# Supplementary material for: Integrated analysis of the Plasmodium species transcriptome
Source: PubMed Central journal article supplement — eBioMedicine. 2016 Apr 22;7:255–66. doi: 10.1016/j.ebiom.2016.04.011 (PMC4909483; doi:10.1016/j.ebiom.2016.04.011), 2016-04-22
Supplement: mmc1.pdf [file mmc1.pdf]

## Supplemental Data

### Supplementary Figure 1

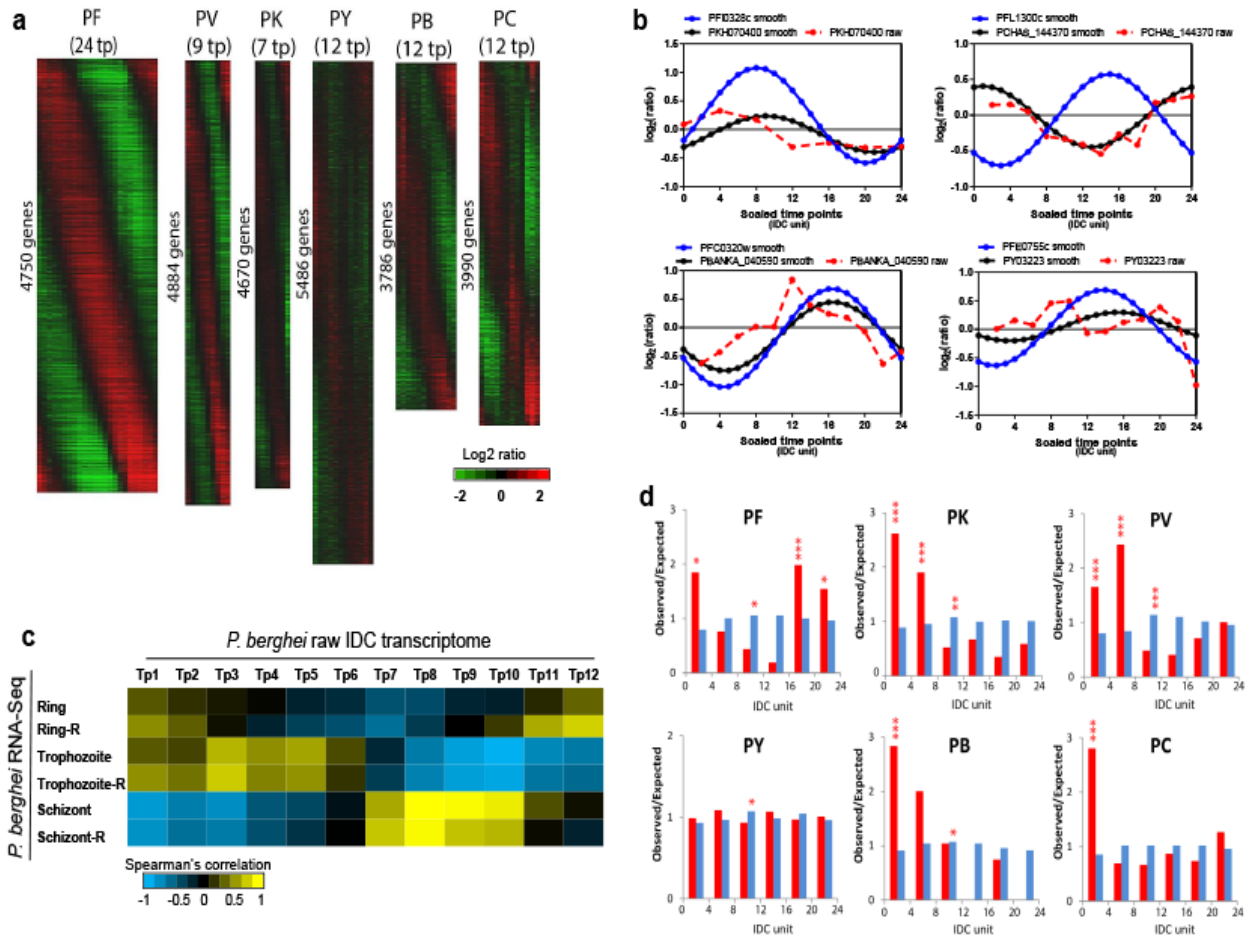

### Supplementary Figure 1: Transcriptome of *P. falciparum*, *P. vivax*, *P. knowlesi*, *P. berghei*, *P. yoelii* and *P. chabaudi*

(a) Raw intraerythrocytic developmental cycle (IDC) transcriptome profiling for *P. falciparum* (Foth et al., 2011) (4750 genes), *P. vivax* (Bozdech et al., 2008) (4884 genes), *P. knowlesi* (Lapp et al., 2015) (4670 genes), *P. yoelii* (5486 genes), *P. berghei* (3787 genes), and *P. chabaudi* (3990 genes) at different IDC time-points. The phaseograms were generated from the log<sub>2</sub> expression ratio and each profile was median centered, with the complete IDC timing indicated above of the different phaseogram. (b) Examples of log<sub>2</sub> expression ratios of orthologous genes in different *Plasmodium* species. The expression profile of the raw dataset for each gene (red line) is best fitted into a sine function which is projected into 25 data points in black line (see methods), as compared to *P. falciparum* (blue line), Related to Figure 1A. (c) Comparison of *P. berghei* RNA seq data to *P. berghei* microarray dataset. Heatmap showed the overall Spearman's correlation coefficient matrix calculated from the ring, trophozoite and schizont stage of *P. berghei* RNA-seq expression values (Otto et al., 2014) from versus *P. berghei* raw

transcriptomes. **(d)** Barplots show the enrichment of stage-specific (peak expression at a particular time interval) genes for 2312 syntenic orthologous (blue bars) and species-specific genes (red bars) of *P. falciparum* (84 genes), *P. knowlesi* (245 genes), *P. vivax* (457 genes), *P. yoelii* (1436 genes), *P. berghei* (29 genes), and *P. chabaudi* (136 genes). The y-axis of observed/expected represents the measurement of enrichment which is the ratio of observed frequency of stage-specific genes to total number of syntenic orthologous/species-specific genes over the ratio of expected frequency of those stage-specific genes to whole genome. Red asterisks represent the significant level of enrichment by binomial test.  $P < 0.05$  (\*),  $P < 0.01$  (\*\*) and  $P < 0.001$  (\*\*\*)).

## Supplementary Figure 2

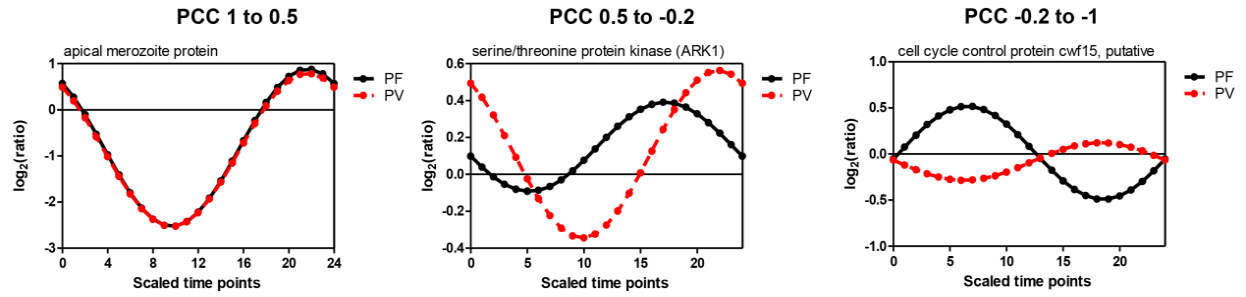

**Supplementary Figure 2:** Representative examples of  $\log_2$  expression ratios of orthologous genes in *P. falciparum* (black line) and *P. vivax* (red line) with PCC scores of 1 to 0.5, 0.5 to -0.2 and -0.2 to -1.

### Supplementary Figure 3

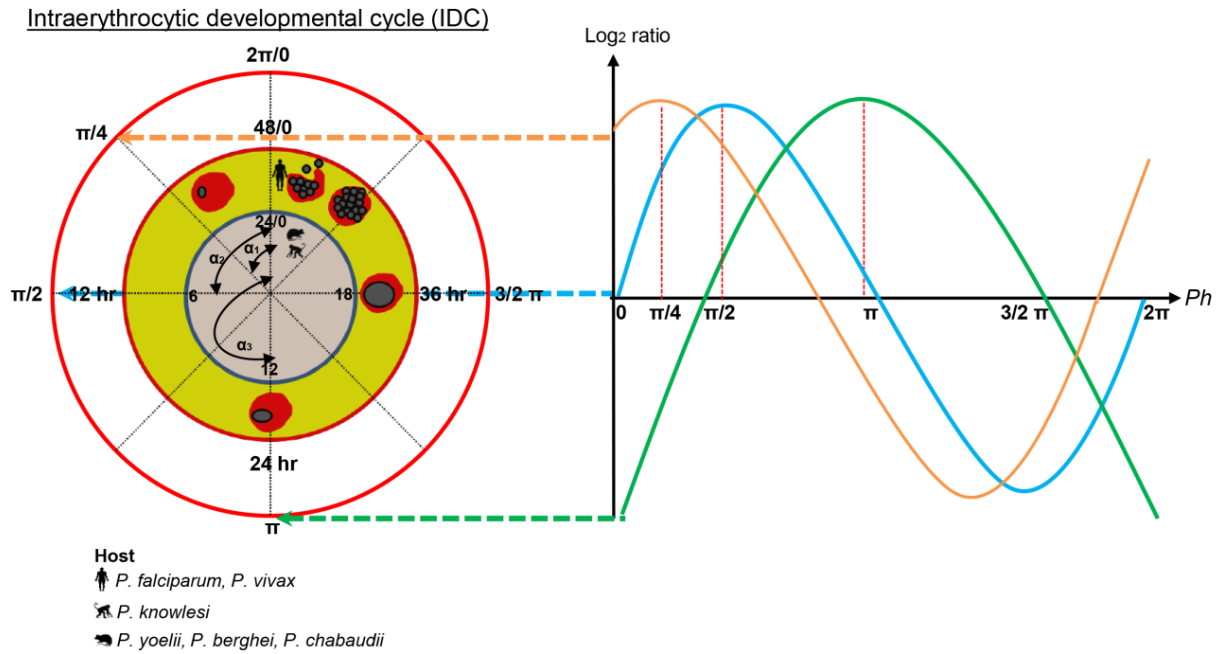

**Supplementary Figure 3: IDC adjustment and projection onto sine wave function**  
Outermost circle in red represents the phase ( $0-2\pi$ ) which corresponds to the parasites IDC in hr at the inner circle (yellow). The time points in hr are adjusted into phase based on the equation described in the methods section.



**Supplementary Table 1: Processed microarray hybridization data of *P. falciparum* (24 time-points), *P. knowlesi* (7 time-points), *P. vivax* (9 time-points), *P. yoelii* (12 time-points), *P. berghei* (12 time-points) and *P. chabaudi* (12 time-points) IDC transcriptome**

The table represents log<sub>2</sub> ratio of mRNA abundance over pooled reference sample from equal mass of RNA from all time-point samples. The raw microarray data were subjected to “normexp” background correction followed by LOWESS (locally weighted scatterplot smoothing) normalization within each array and quantile normalization between arrays using Limma package of R. The data were filtered as described in method section. Related to Figure 1a.

***P. falciparum* (dd2)**

| geneid         | TP01     | TP02     | TP03     | TP04     | TP05     | TP06     | TP07     | TP08     | TP09     | TP10     | TP11     | TP12     | TP13     | TP14     | TP15     | TP16     | TP17     | TP18     | TP19     | TP20     | TP21     | TP22     | TP23     | TP24     |
|----------------|----------|----------|----------|----------|----------|----------|----------|----------|----------|----------|----------|----------|----------|----------|----------|----------|----------|----------|----------|----------|----------|----------|----------|----------|
| PF07_0009      | 1.54618  | 1.0143   | 0.80159  | 1.09067  | 1.4068   | 0.58109  | 0.14742  | 0.17137  | -0.00655 | -0.43707 | -0.48581 | -0.27159 | -0.56451 | -0.55757 | -0.71978 | -0.92737 | -0.39851 | -0.87396 | -0.03656 | 0.2922   | 0.38111  | -0.024   | 0.59784  | 1.16558  |
| PFE1440c       | 0.76779  | 0.58954  | 0.69183  | 0.88593  | 0.85327  | 0.91161  | 0.87339  | 0.69227  | 0.66223  | 0.34193  | 0.1042   | 0.17039  | 0.03707  | -0.02616 | -0.1695  | -0.07326 | -0.08948 | -0.11067 | 0.325    | 0.32734  | 0.53806  | 0.54177  | 0.75169  | 0.65999  |
| PF1377w        | 0.51408  | 0.56092  | 0.44051  | 0.53879  | 0.60322  | 0.42914  | 0.00262  | -0.01434 | -0.04586 | -0.1607  | -0.05363 | -0.01853 | -0.00143 | -0.0841  | -0.01995 | -0.13498 | -0.09212 | -0.09817 | 0.22727  | 0.11406  | 0.38563  | 0.45798  | 0.50116  | 0.70628  |
| PF14_0624      | 0.27144  | 0.32559  | 0.6064   | 0.38353  | 0.61939  | 0.26355  | 0.41563  | 0.24091  | 0.39945  | 0.48252  | 0.36487  | 0.38842  | 0.31908  | 0.21416  | 0.0725   | 0.11895  | -0.04777 | -0.26703 | 0.02705  | -0.13721 | 0.1082   | -0.06406 | -0.12401 | -0.05564 |
| PF1125c        | 0.05522  | 0.54887  | 0.34468  | 0.78484  | 0.77663  | 0.95311  | 1.93015  | 1.70569  | 1.64538  | 1.09226  | 0.65544  | 0.38425  | 0.33892  | 0.04882  | 0.05041  | -0.12015 | -0.16747 | 0.00624  | 0.06308  | 0.24523  | 0.21635  | 0.56056  | 0.61342  | 0.70227  |
| PF1395w        | -0.01622 | -0.07854 | -0.37009 | -0.5364  | -0.70494 | -0.64174 | -0.72919 | -0.90503 | -0.48998 | -0.57052 | -0.54385 | -0.05342 | 0.02702  | 0.26951  | 0.725    | 0.83551  | 0.57698  | 0.80631  | 0.98391  | 0.6714   | 0.28074  | 0.06165  | -0.26611 | -0.41373 |
| PF0495w        | -0.33025 | -0.3349  | -0.49862 | -0.56933 | -0.46686 | -0.58641 | -0.55674 | -0.63359 | -0.16735 | 0.21514  | 0.51263  | 0.64586  | 0.70804  | 0.54744  | 0.77335  | 0.59896  | 0.47642  | 0.23413  | 0.15428  | -0.06626 | -0.05922 | -0.13248 | -0.4323  | -0.24056 |
| PF14_0359      | -0.24578 | -0.11775 | 0.13224  | 0.22261  | 0.06922  | 0.29197  | 0.12034  | 0.39792  | 0.72176  | 0.92907  | 0.95158  | 1.10819  | 0.86947  | 0.54791  | 0.19405  | -0.31702 | -1.19306 | -0.68087 | -1.29924 | -1.44219 | -1.20739 | -0.92183 | -0.78214 | -0.69515 |
| PFL1090w       | 0.75545  | 0.37041  | -0.70212 | -0.35244 | -0.12986 | -1.94796 | -2.16332 | -2.87823 | -3.71937 | -0.95196 | -0.40355 | -3.41327 | -3.13132 | -2.90225 | -1.69636 | -1.06186 | 0.28797  | 0.26024  | 1.14161  | 1.37707  | 1.13967  | 0.57392  | 1.07147  | 0.81732  |
| PF1230c        | 0.32986  | 0.53164  | 0.6351   | 0.76778  | 0.70373  | 0.56349  | 0.61844  | 0.60169  | 0.76608  | 0.61122  | 0.51566  | 0.41375  | 0.33231  | 0.14036  | -0.05751 | -0.06966 | -0.14087 | -0.00083 | 0.05983  | 0.12271  | 0.19988  | 0.30515  | 0.36036  | 0.39125  |
| PF08_0030      | -0.16218 | 0.44256  | -0.07304 | -0.22799 | -0.65441 | -0.14415 | -0.15708 | -0.19902 | 0.95682  | 0.66448  | 0.47381  | 0.82432  | 0.34056  | 0.51738  | 0.54266  | 0.28243  | 0.73749  | 0.20834  | 0.30664  | 0.06935  | -0.07993 | 0.15111  | 0.08239  | 0.11682  |
| MAL13P1.12     | 0.02193  | -0.78264 | 0.19724  | 0.34326  | 0.44359  | 0.03359  | 0.11292  | 0.41195  | -0.07414 | -0.05732 | 0.25989  | 0.3001   | 0.229    | -0.04577 | 0.17741  | -0.12296 | 0.15505  | 0.32274  | 0.43418  | 0.15311  | 0.22815  | 0.14697  | 0.24247  | -0.00332 |
| PF10_0261      | 0.58058  | 0.41668  | 0.43123  | 0.51837  | 0.5428   | 0.23706  | -0.07499 | 0.04981  | -0.46134 | 0.46136  | 0.21857  | -0.18164 | -0.03831 | -0.01922 | 0.15938  | 0.20609  | 0.12417  | -0.04056 | 0.68314  | 0.23196  | 0.33184  | 0.45831  | 0.36957  | 0.5488   |
| PFB0670c       | 0.6253   | 0.01498  | -0.20316 | -0.23123 | -0.25107 | -0.61518 | -0.7805  | -1.02732 | -1.6892  | -1.96724 | -1.85972 | -2.21956 | -2.25452 | -2.1657  | -2.12348 | -1.6886  | -0.68093 | -0.07216 | 1.69178  | 1.17188  | 1.34105  | 1.20505  | 1.28922  | 1.65799  |
| PF0010w        | 0.2032   | 0.44629  | 0.08855  | 0.76978  | 0.76625  | 0.99766  | 1.20006  | 1.07118  | 1.2367   | 1.05486  | 0.79582  | 0.69942  | 0.67443  | 0.6385   | 0.27508  | 0.17394  | -0.2086  | -0.31194 | -0.17267 | -0.31269 | -0.48826 | -0.2646  | -0.18322 | -0.34075 |
| MAL13P1.58     | 0.13907  | 0.30222  | 0.81054  | 0.6047   | 1.51942  | 1.96612  | 2.37055  | 2.70952  | 1.70961  | 1.54712  | 1.05241  | 0.80916  | 0.30836  | 0.1508   | -0.09089 | -0.19517 | -0.66155 | -0.6028  | -0.60694 | -0.44367 | -0.47864 | -0.46389 | -0.45586 | -0.23426 |
| MAL7P1.161     | 0.79366  | 0.6536   | -0.15331 | 0.30152  | 0.0963   | -0.27569 | -0.52485 | -0.49952 | -0.97905 | -0.94098 | -0.86979 | -0.96738 | -0.81058 | -0.94235 | -0.76211 | -0.28684 | 0.30019  | 0.54435  | 1.17181  | 1.26569  | 0.97879  | 0.72707  | 1.13577  | 0.76244  |
| PF13_0215      | -0.09258 | -0.3935  | -0.18879 | -0.05633 | -0.04402 | 0.1843   | 0.33643  | 0.15886  | -0.13421 | 0.54723  | 0.38864  | 0.47263  | 0.21588  | 0.13083  | -0.10335 | -0.3973  | -0.27164 | -1.00962 | 0.29809  | -0.36421 | -0.09967 | 0.02712  | 0.19451  | 0.32153  |
| PF08_0062      | -0.04921 | 0.16698  | 0.51909  | 0.01734  | 0.23915  | 0.09973  | -0.0008  | -0.16864 | 0.91846  | 0.74692  | 0.14436  | 0.42118  | 0.3412   | 0.31644  | 0.15594  | -0.04096 | 0.17048  | 0.07786  | -0.04891 | 0.1245   | 0.20899  | 0.25818  | 0.34769  | 0.54783  |
| PF0110w        | -0.34811 | -0.41365 | -0.36427 | -0.39515 | -0.51707 | -0.48825 | -0.47125 | -0.34047 | -0.12885 | 0.11131  | 0.34641  | 0.99543  | 0.9278   | 0.69179  | 0.55067  | 0.48446  | 0.37268  | 0.32614  | 0.22728  | -0.03609 | -0.21199 | -0.05939 | -0.09282 | -0.13562 |
| PF0730w        | 0.15671  | -0.75271 | -0.31234 | -0.63462 | -0.69566 | 0.19283  | 0.28042  | 0.41921  | -0.07128 | -0.725   | -0.15694 | -0.48211 | -0.39201 | -0.37246 | 0.33374  | 0.48548  | 0.61252  | 0.21164  | 0.56608  | 0.20739  | -0.38435 | -0.60178 | -0.43063 | -1.22501 |
| PF14_0511      | 0.33087  | 0.38997  | 0.33563  | 0.72756  | 0.52765  | 0.41351  | 0.25036  | 0.4034   | 0.00426  | 0.48354  | 0.24086  | 0.07799  | 0.28168  | -0.00609 | 0.01718  | 0.0733   | -0.00314 | -0.22383 | -0.09298 | 0.00456  | 0.19082  | 0.04326  | 0.10652  | -0.09088 |
| MAL13P1.107    | 0.46703  | 0.14248  | 0.15792  | 0.50843  | 0.31317  | -0.03964 | 0.4137   | 0.11473  | 0.52085  | 0.63501  | 0.66848  | 0.73052  | 0.4388   | 0.50201  | 0.08671  | -0.13011 | -0.07387 | -0.07226 | -0.43784 | -0.03482 | 0.15507  | -0.0771  | 0.02716  | -0.06397 |
| MAL8P1.112     | 0.74017  | 0.72906  | 0.43611  | 0.37002  | 0.0197   | 0.05251  | -0.23181 | -0.15643 | -0.1614  | -0.1585  | -0.29491 | -0.26611 | -0.44992 | -0.43971 | -0.48109 | -0.51439 | 0.03668  | 0.36213  | 0.92185  | 0.74478  | 0.83254  | 0.49244  | 0.61693  | 0.62354  |
| PF07_0014      | 0.04674  | 0.39607  | 0.42461  | 0.33708  | 0.36466  | 0.10021  | 0.02419  | -0.18795 | 0.20667  | 0.2888   | 0.03422  | 0.21631  | 0.25255  | 0.16445  | 0.21829  | 0.03056  | -0.03519 | 0.09268  | 0.09433  | 0.18736  | 0.19023  | 0.06712  | 0.27908  | 0.29508  |
| PF14_0653      | -0.29919 | -0.54788 | -0.61311 | -0.76803 | -0.82383 | -0.62702 | -0.45412 | -0.55658 | -0.70358 | -1.25482 | -0.59425 | -0.44476 | -0.14311 | 0.13207  | 0.38691  | 0.74632  | 0.73477  | 0.7266   | 0.54453  | 0.55131  | 0.34173  | -0.24068 | -0.22685 | -0.54746 |
| PFL0140w       | 0.30341  | 0.65235  | 0.47069  | 0.76     | 1.04112  | 1.06367  | 0.81495  | 0.80915  | 0.63798  | 0.58092  | 0.66729  | 0.51375  | 0.49546  | 0.33573  | 0.36073  | 0.18339  | -0.13174 | -0.08969 | -0.12453 | -0.30005 | -0.18456 | -0.17298 | 0.06238  | 0.40264  |
| PF08_0024      | -0.06413 | 0.22566  | 0.27315  | 0.27292  | 0.13934  | 0.40753  | 0.23232  | 0.34726  | 0.31342  | -0.00909 | 0.24922  | 0.5081   | 0.31149  | 0.24339  | 0.1979   | 0.09992  | 0.13712  | 0.15371  | 0.17125  | 0.16114  | 0.3618   | 0.56256  | 0.62723  | 0.46707  |
| PF13_0049      | -0.66833 | 0.1441   | 0.48793  | 0.37063  | 0.52729  | 0.43143  | 0.23398  | 0.45031  | 0.24466  | 0.38719  | 0.55861  | 0.34287  | 0.43378  | 0.20635  | 0.36733  | 0.07866  | -0.64191 | -0.83106 | -1.13857 | -1.31571 | -1.27066 | -1.23321 | -1.15177 | -1.12813 |
| PF13_0163      | 0.34283  | 0.37458  | 0.432    | 0.47055  | 0.2736   | 0.22926  | 0.18366  | 0.26717  | 0.11083  | -0.16476 | -0.08163 | 0.04811  | -0.01567 | -0.38356 | -0.25089 | -0.68444 | -0.58917 | -1.19219 | -0.59212 | -0.06695 | 0.22536  | 0.24552  | 0.57637  | 0.88648  |
| PFL2325c       | -0.36458 | -0.45369 | -0.48571 | -0.55999 | -0.45963 | -0.588   | -0.72777 | -0.49916 | -0.60817 | -0.27124 | -0.13261 | -0.36532 | 0.07353  | -0.03803 | 0.04832  | -0.03408 | 0.03696  | -0.28352 | 0.23909  | -0.27438 | -0.42811 | -0.43858 | -0.09397 | -0.2133  |
| PFL2190c       | 0.37865  | 0.54055  | 0.42019  | 0.37236  | 0.64155  | 0.23903  | 0.17514  | 0.37582  | 0.46865  | 0.57309  | 0.24923  | 0.44096  | 0.24269  | 0.09342  | -0.09947 | -0.09355 | -0.00462 | -0.08953 | 0.06275  | 0.33246  | 0.61052  | 0.35538  | 0.40551  | 0.49953  |
| PFA0610c       | 0.58378  | 1.46232  | 0.41234  | 0.91357  | 0.51524  | 0.24186  | 0.0249   | -0.2541  | -0.69006 | -0.37507 | -0.41664 | -0.37959 | -0.23154 | -0.22492 | 0.02209  | -0.01116 | -0.06129 | -0.30194 | -0.02761 | -0.09732 | 0.06456  | 0.39407  | 0.34864  | 0.31676  |
| PF01010w       | -0.08677 | 0.08425  | 0.46669  | 0.0712   | -0.21452 | -0.18793 | -0.13138 | -0.19912 | 0.19219  | 0.19332  | 0.26068  | 0.37334  | 0.46887  | 0.39956  | 0.19949  | 0.33807  | 0.321    | 0.48946  | 0.34533  | 0.23725  | 0.32399  | 0.33608  | 0.20452  | 0.08012  |
| PF14_0017      | -0.79276 | -1.32124 | -0.49154 | -0.17175 | 0.04398  | 1.24097  | 2.58418  | 2.76392  | 2.08662  | 1.45056  | 1.11734  | 0.6158   | -0.13434 | -0.12791 | -0.24482 | -0.49119 | -0.70376 | -0.54272 | -0.30979 | -0.45063 | -0.28829 | -0.39857 | -0.21138 | -0.05805 |
| PF10_0139      | 0.59763  | 0.38582  | 1.06752  | 0.50084  | 0.27379  | 0.42435  | 0.27214  | 0.23274  | 0.08702  | 0.16114  | 0.01634  | 0.22228  | 0.23792  | 0.20458  | 0.13874  | 0.08963  | 0.13181  | -0.04483 | -0.12242 | -0.01867 | 0.07942  | 0.08438  | -0.0428  | -0.0132  |
| MAL8P1.25a     | -0.7224  | -0.19694 | -0.2219  | -0.27836 | -0.18208 | -0.20816 | -0.01371 | 0.14091  | 0.28508  | 0.23391  | 0.5757   | 0.57371  | 0.64026  | 0.46448  | 0.5396   | 0.51003  | 0.21491  | -0.00493 | 0.51771  | -0.05542 | -0.15439 | -0.18828 | -0.04523 | 0.09629  |
| MAL6_trnA_Ala1 | 0.4276   | 0.9038   | 0.60055  | -0.00497 | -0.27177 | 0.16041  | 0.14073  | 0.0664   | 0.78019  | 0.37335  | 0.40461  | 0.40693  | 0.32267  | 0.06725  | 0.1726   | 0.06334  | -0.48057 | 0.26272  | 0.45447  | -0.10942 | 0.02506  | 0.5994   | 0.07692  | -0.14003 |
| PF11_0474      | -0.05946 | -0.17013 | 0.14304  | -0.27265 | -0.1759  | -0.09519 | -0.31313 | -0.16295 | -0.49647 | -0.57162 | -0.30522 | -0.49209 | -0.39332 | -0.44117 | -0.41196 | -0.3299  | -0.37529 | -0.06492 | 0.02293  | 0.14174  | 0.02771  | 0.0      |          |          |

|             |          |          |          |          |          |          |          |          |          |          |          |          |          |          |          |          |          |          |          |          |          |          |          |          |
|-------------|----------|----------|----------|----------|----------|----------|----------|----------|----------|----------|----------|----------|----------|----------|----------|----------|----------|----------|----------|----------|----------|----------|----------|----------|
| PFA0505c    | 0.30024  | 0.32935  | 0.83236  | 0.6119   | 0.56695  | 0.74035  | 0.70387  | 0.93575  | 0.69236  | 0.68447  | 0.57823  | 0.51057  | 0.45746  | 0.22241  | 0.18429  | -0.00045 | -0.4399  | -0.32193 | -0.15942 | -0.73266 | -0.81934 | -0.16604 | 0.12777  | 0.29033  |
| PF1120c     | -0.06651 | -0.62472 | -0.49253 | -0.20468 | -0.45004 | -0.29173 | -0.60306 | -0.31825 | -0.32804 | 0.3454   | 0.50636  | 0.91247  | 0.49293  | 0.75722  | 0.77756  | 0.49203  | 0.0168   | 0.33585  | 0.71735  | 0.17623  | 0.03384  | -0.05679 | -0.13235 | -0.19763 |
| PF14_0754   | 0.04241  | -0.05206 | -0.23125 | -0.27466 | -0.51384 | -0.41955 | -0.44833 | -0.26266 | -0.11294 | 0.32649  | 0.15004  | 0.68633  | 0.4971   | 0.64466  | 0.69411  | 0.7625   | 0.40816  | 0.33778  | 0.42317  | 0.15564  | 0.12064  | -0.03726 | 0.03707  | -0.07274 |
| PFI0030c    | 1.04319  | 0.13575  | 0.45662  | 0.09783  | -0.2679  | -0.27888 | -0.30018 | -0.11643 | -0.11701 | 0.01276  | 0.06644  | 0.1253   | -0.13216 | -0.21604 | -0.31138 | -0.43108 | -0.19982 | -0.68574 | 0.45791  | 0.28564  | 0.2936   | 0.08565  | 0.167    | 0.31197  |
| PFI0185w    | 0.04224  | 0.25217  | 0.56451  | 0.12145  | 0.35678  | 0.19369  | 0.19431  | 0.19394  | 0.31969  | 0.7018   | 0.43616  | 0.52422  | 0.38206  | 0.28378  | 0.07827  | -0.10517 | -0.07213 | -0.09669 | 0.00569  | 0.01689  | 0.09957  | 0.05205  | 0.15463  | 0.17342  |
| MAL13P1.64  | -0.33616 | -0.58576 | -0.49674 | -0.45107 | -0.52637 | -0.11113 | -0.45169 | -0.54139 | -0.44276 | -0.36505 | -0.19004 | -0.12073 | 0.13384  | 0.3747   | 0.83004  | 0.83837  | 0.67938  | 0.43629  | 0.63064  | 0.29617  | 0.12763  | -0.24093 | -0.36803 | -0.27689 |
| PFB0826c    | -0.06805 | 0.52595  | 0.85941  | 0.13377  | 1.42264  | 1.60886  | 0.67991  | 2.08341  | 0.06054  | 1.43195  | 1.36917  | 1.17793  | 0.86297  | 0.67804  | 0.4171   | 0.13651  | -0.38322 | -0.2442  | -0.35076 | -0.4456  | -0.44545 | -0.46662 | -0.49359 | -0.0565  |
| MAL13P1.325 | -0.22556 | -0.40732 | 0.12027  | -0.31259 | -0.18068 | -0.22469 | -0.29424 | -0.32634 | 0.21996  | 0.83318  | 0.82345  | 1.10143  | 0.93473  | 0.60462  | 0.52837  | 0.42237  | 0.12099  | 0.23763  | 0.1747   | 0.07312  | 0.00936  | -0.0721  | -0.10751 | -0.01642 |
| PF11_0312   | -0.57853 | 1.9174   | 0.98906  | 1.06823  | 0.45509  | 0.82888  | 0.62939  | 0.71423  | 0.66168  | 0.27882  | 0.61499  | 0.41687  | 0.28881  | -0.07855 | 0.5019   | -0.46904 | -0.6192  | -0.30286 | -0.6039  | -1.92152 | -2.1092  | -1.54481 | -1.40087 | -0.16707 |
| MAL13P1.77  | 0.47433  | 0.27516  | 0.58928  | 0.53519  | 0.41863  | 0.37054  | 0.42575  | 0.41099  | 0.15402  | -0.46338 | -0.04539 | -0.05972 | -0.13297 | -0.47595 | -0.14881 | -0.60696 | -0.28128 | -0.50918 | 0.90008  | -0.0978  | 0.00658  | 0.3749   | 0.48349  | 0.51018  |
| MAL13P1.309 | 0.61913  | 0.39329  | 0.26664  | 0.71464  | 1.00894  | 0.77763  | 0.55857  | 0.6585   | 0.35232  | -0.22014 | 0.20932  | -0.25796 | 0.03535  | -0.20475 | -0.19718 | -0.2511  | -0.70795 | -0.17499 | 0.66527  | 0.63031  | 1.16092  | 0.3842   | 0.91332  | 0.53234  |
| PFE0700c    | -0.26743 | -0.57423 | -0.22203 | -0.02432 | -0.54644 | -0.30287 | -0.80227 | -1.22016 | -0.61735 | -0.53072 | -0.64147 | -0.94428 | -0.93241 | -0.80344 | -1.07308 | -1.05022 | -0.413   | -0.43066 | -0.0724  | -0.2334  | -0.48675 | -0.34092 | -0.16694 | -0.05026 |
| PFL0545w    | 0.22042  | -0.08413 | 0.0081   | -0.27633 | -0.35224 | -0.30413 | -0.49656 | -0.45512 | -0.19306 | -0.08726 | -0.12541 | 0.22075  | 0.24816  | 0.36757  | 0.31444  | 0.40245  | 0.31228  | 0.44667  | 0.24203  | 0.34146  | 0.27191  | 0.24818  | 0.15887  | 0.04917  |
| PF0280w     | 0.54466  | 0.50925  | 0.13415  | 0.43228  | 0.0548   | 0.22867  | -0.05766 | -0.45779 | -0.26911 | -0.49282 | -0.3707  | -0.42154 | -0.39589 | -0.46182 | -0.24826 | 0.04467  | 0.22956  | 0.35772  | 1.18439  | 0.75011  | 0.52842  | 0.64427  | 0.10338  | 0.75818  |
| PF14_0753   | 1.82516  | 1.72832  | 2.02433  | 1.8585   | 1.43099  | 0.66057  | 0.63326  | 0.10884  | -0.57411 | -1.02625 | -1.46965 | -1.43564 | -1.66661 | -1.3929  | -0.61743 | -0.38295 | -0.34404 | -0.4162  | -0.10127 | 0.26097  | 0.43116  | 0.88411  | 1.24922  | 1.1731   |
| PFF1195c    | -0.02474 | 0.74467  | -0.89076 | -0.29676 | -0.1011  | -0.03924 | -0.16663 | -0.68435 | -0.26582 | -0.24228 | -0.20228 | -0.06321 | -0.20812 | -0.19086 | -0.36346 | 0.08741  | 0.32165  | -0.07913 | 0.12599  | 0.11089  | -0.09872 | -0.03439 | -0.02821 | -0.09988 |
| PFI0275w    | 0.68586  | 0.14519  | 1.75912  | 0.17459  | 0.03832  | 0.02573  | -0.09819 | 0.02404  | -0.18738 | -0.01943 | -0.23609 | -0.09677 | -0.16169 | -0.08961 | -0.10918 | -0.27925 | -0.04841 | 0.09294  | 0.07806  | 0.36416  | 0.14038  | 0.02403  | 0.25876  |          |
| MAL13P1.245 | 0.39422  | 0.01675  | 0.7709   | 0.05236  | 0.08403  | 0.18004  | -0.04928 | -0.2209  | -0.05598 | -0.14156 | -0.08076 | 0.14418  | 0.04977  | -0.03753 | -0.08032 | -0.04362 | 0.17369  | 0.12899  | 0.65616  | 0.38112  | 0.36476  | 0.37441  | 0.45252  | 0.59174  |
| MAL7P1.24   | 0.10678  | 0.6634   | 0.6789   | 0.73963  | 0.46578  | 0.67316  | 0.59201  | 0.69385  | 0.56499  | 0.60576  | 0.72463  | 0.3855   | 0.43428  | 0.24862  | 0.24318  | -0.09391 | -0.75306 | -0.82594 | -0.44805 | -0.73274 | -0.61953 | -0.22458 | 0.01908  | 0.13676  |
| PFB0400w    | -0.84346 | -0.51243 | -0.37634 | -0.29233 | -0.37036 | -0.80381 | -0.42616 | -0.47011 | -0.4868  | 0.24244  | -0.31202 | -0.32603 | -0.30696 | -0.79123 | 0.1181   | 0.17643  | -0.07008 | -0.2221  | -0.2418  | -0.52451 | -0.70973 | -0.08257 | -0.83092 | -0.3516  |
| PF13_0128   | 0.00076  | 0.81603  | 0.66824  | 1.04665  | 0.60966  | 0.28526  | 0.21002  | 0.58038  | 0.2208   | 0.64496  | 0.27685  | 0.56356  | 0.72495  | 0.39665  | 0.45039  | 0.16605  | -0.02915 | 0.12485  | -0.1175  | -0.13041 | 0.07142  | 0.13067  | 0.01521  |          |
| PFE1135w    | 0.45592  | 0.55826  | 0.98207  | 1.01005  | 0.69693  | 1.06275  | 0.90534  | 1.05176  | 0.87488  | 0.8734   | 0.89038  | 0.73153  | 0.63441  | 0.1117   | 0.08561  | -0.14789 | -0.38066 | -0.68695 | -0.56463 | -0.9523  | -0.73549 | -0.36039 | -0.07528 | 0.47674  |
| PFC0176c    | -0.13137 | 0.21505  | 0.05167  | 0.37733  | 0.5257   | 0.34115  | 0.10866  | 0.02553  | 0.03296  | 0.04788  | 0.1195   | 0.10823  | 0.101    | 0.10041  | 0.35792  | 0.42141  | 0.31229  | 0.28681  | 0.7107   | 0.46927  | 0.3857   | 0.16374  | 0.30168  | 0.26961  |
| MAL13P1.119 | 0.396    | 0.34663  | 0.07746  | -0.0362  | -0.04174 | -0.13019 | -0.29475 | -0.32926 | -0.24609 | -0.74    | -0.17413 | -0.49306 | -0.30826 | -0.30347 | -0.30429 | -0.01534 | 0.409    | 0.38515  | 0.9853   | 0.58767  | 0.62547  | 0.7435   | 0.43353  | 0.32103  |
| PF0580c     | 0.10012  | 0.55819  | 0.41845  | 0.48708  | 0.55675  | 0.59277  | 0.54268  | 0.58541  | 0.65799  | 0.66391  | 0.54986  | 0.4341   | 0.30681  | 0.11652  | 0.23906  | 0.05362  | 0.03427  | 0.03235  | 0.04592  | 0.01917  | 0.32014  | 0.22079  | 0.31228  | 0.42066  |
| PF14_0358   | 0.36607  | 0.39648  | 0.61358  | 0.86713  | 0.88433  | 1.00014  | 0.68568  | 0.71502  | 0.60646  | 0.28701  | 0.39827  | 0.73058  | 0.43946  | 0.32902  | 0.34667  | 0.42026  | -0.0397  | 0.04259  | 0.25278  | -0.03236 | -0.21516 | -0.13432 | 0.18851  | 0.05103  |
| PFI1555w    | 0.6816   | -0.40208 | -0.56747 | -0.61697 | -0.84019 | -1.1374  | -1.01915 | -1.27343 | -1.91187 | -2.53805 | -2.2257  | -2.35542 | -2.12942 | -2.22001 | -2.32719 | -1.54262 | -0.77264 | -0.48814 | 1.51911  | 1.29843  | 1.18993  | 0.62174  | 1.16807  | 1.3744   |
| PFI1525w    | -0.7629  | -0.70753 | -0.57479 | -0.29529 | -0.63637 | -0.28043 | -0.30248 | -0.14214 | -0.07258 | 0.08658  | 0.27775  | 0.48602  | 0.61472  | 0.67348  | 0.90169  | 0.79497  | 0.28911  | 0.5365   | 0.38495  | 0.07132  | -0.41716 | -0.2675  | -0.47648 | -0.54007 |
| MAL13P1.125 | 0.13421  | 0.23235  | 0.36164  | 0.15127  | 0.06205  | 0.16391  | 0.37152  | 0.4877   | 0.63984  | 0.75086  | 0.48788  | 0.49453  | 0.43369  | 0.33249  | 0.11483  | 0.13411  | 0.11067  | 0.04835  | 0.02787  | 0.047    | 0.2201   | 0.29385  | 0.16375  | 0.37365  |
| PFE0220w    | 0.03069  | -0.10874 | 0.50288  | 0.45177  | 0.49903  | 0.42422  | 0.55177  | 0.39485  | -0.23051 | -0.359   | 0.1604   | -1.28719 | 0.30271  | 0.13573  | -0.13428 | 0.11407  | -0.0219  | -0.09856 | 0.29172  | 0.52726  | 0.44543  | 0.20714  | 0.68491  | 0.77183  |
| PF07_0060   | 0.29552  | 0.85601  | 0.56569  | 0.73547  | 0.54606  | 0.45373  | 0.36408  | 0.23948  | 0.11489  | 0.08371  | 0.11883  | 0.11071  | 0.19664  | 0.02502  | -0.0405  | 0.03377  | 0.16882  | 0.01145  | 0.56733  | 0.18863  | 0.2025   | 0.13131  | 0.26298  | 0.09876  |
| PFD0430c    | 0.21721  | 0.54055  | 0.36055  | 0.05313  | 0.44498  | 0.21195  | 0.33215  | 0.33529  | 0.41265  | 0.68644  | 0.4916   | 0.45315  | 0.52005  | 0.44757  | 0.24333  | 0.14579  | -0.07499 | -0.15412 | 0.58688  | -0.16854 | -0.17425 | -0.11322 | -0.23204 | -0.12108 |
| MAL7P1.34   | 1.08697  | 1.16162  | 0.95927  | 1.28382  | 1.31412  | 1.20952  | 1.0006   | 0.59308  | -0.27256 | -0.59637 | -0.82472 | -1.12319 | -1.29314 | -1.36387 | -1.10147 | -0.7657  | -1.33291 | -0.93388 | -0.08454 | 0.17962  | 0.5875   | 0.53612  | 0.96255  | 1.25859  |
| PFD0700c    | 0.50076  | 1.03566  | 0.97089  | 1.58294  | 1.65746  | 1.48247  | 1.45561  | 1.32182  | 0.25411  | 0.7054   | 0.66039  | 0.27039  | 0.3097   | 0.02986  | -0.06141 | -0.14448 | -0.24248 | -0.11419 | 0.19757  | -0.00261 | 0.28541  | 0.1974   | 0.68756  | 1.04747  |
| MAL13P1.410 | 0.00757  | 0.54665  | 0.49552  | 0.96559  | 1.57082  | 0.60312  | 0.66692  | 1.68063  | 0.56354  | 0.75902  | 0.72001  | 0.70788  | 0.5449   | 0.24082  | 0.1436   | -0.13023 | -0.26322 | -0.06349 | 0.13592  | -0.03846 | 0.22316  | 0.19621  | 0.2403   | 0.34208  |
| PF0795w     | 0.1985   | 0.073    | 0.64872  | 0.27826  | 0.35727  | 0.38704  | 0.28439  | 0.27106  | 0.33099  | 0.65667  | 0.44635  | 0.36054  | 0.41441  | 0.27226  | 0.01369  | 0.05242  | -0.09499 | -0.07634 | -0.11763 | -0.10391 | 0.05559  | -0.06325 | 0.06105  | 0.3863   |
| PFC0166w    | -0.41123 | 0.32261  | 0.52993  | -0.61174 | -0.03072 | 0.75608  | 1.05329  | 0.95705  | 1.45438  | 1.49337  | 1.35279  | 1.17362  | 0.80923  | 0.41598  | 0.1259   | -0.07456 | -0.34782 | -0.08859 | -0.42639 | -0.41004 | -0.36602 | -0.61514 | -0.55368 | -0.499   |
| PFA0050c    | 0.64665  | 0.42148  | 0.59495  | 0.409    | 0.28558  | 0.36727  | 0.48661  | 0.7317   | 0.68819  | 0.62533  | 0.51597  | 0.67355  | 0.55804  | 0.22774  | 0.5233   | 0.50059  | 0.12927  | 0.13739  | 0.67259  | 0.01578  | 0.11458  | 0.30302  | -0.0695  | -0.10245 |
| PFD0745c    | 0.35232  | 0.27116  | 0.26309  | 0.27361  | 0.14833  | 0.03492  | -0.01884 | -0.22128 | -0.3922  | -0.91981 | -0.38409 | -0.29324 | -0.4731  | -0.53961 | -0.12882 | -0.00283 | -0.09476 | -0.11944 | 0.58578  | 0.32813  | 0.35404  | 0.3034   | 0.39129  | 0.64677  |
| PFI1640c    | 0.15409  | 0.45818  | 0.58951  | 0.29675  | 0.40073  | 0.56539  | 0.49307  | 0.3452   | 0.60391  | 0.32344  | 0.41184  | 0.5061   | 0.33087  | 0.19581  | -0.05833 | -0.05751 | -0.0622  | -0.19576 | -0.59337 | -0.34758 | -0.21355 | -0.08941 | 0.10782  | 0.09363  |
| PFA0015c    | 0.47534  | 1.25991  | 0.88887  | 1.45234  | 1.66218  | 1.61849  | 1.45257  | 1.82978  | 1.1891   | 0.95491  | 0.88077  | 0.62445  | 0.34048  | 0.31024  | 0.25583  | 0.1106   | -0.34984 | -0.40438 | -0.43856 | -0.56296 | -0.5839  | -0.57044 | -0.52512 |          |

|             |          |          |          |          |          |          |          |          |          |          |          |          |          |          |          |          |          |          |          |          |          |           |          |          |
|-------------|----------|----------|----------|----------|----------|----------|----------|----------|----------|----------|----------|----------|----------|----------|----------|----------|----------|----------|----------|----------|----------|-----------|----------|----------|
| PFL0070c    | -0.04576 | 0.03872  | 0.40071  | 0.10458  | -0.08451 | -0.33852 | -0.24148 | -0.02403 | 0.41139  | 0.61507  | 0.56602  | 0.84558  | 0.75083  | 0.67728  | 0.33859  | 0.09345  | 0.11178  | 0.13129  | -0.21239 | 0.01499  | 0.04128  | 0.1096    | -0.06727 | -0.11922 |
| PFL1265c    | 0.66607  | 1.21762  | 1.20443  | 1.28748  | 1.30379  | 0.77077  | 0.66116  | 0.66526  | 0.24446  | 0.03507  | 0.18598  | 0.08285  | 0.06131  | -0.01869 | -0.08323 | -0.132   | -0.06501 | 0.00469  | 0.12585  | 0.24836  | 0.51402  | 0.54549   | 0.74601  | 1.02577  |
| PFC0831w    | 0.59453  | 0.09485  | 0.61572  | 0.20313  | 0.18013  | 0.01119  | 0.0336   | -0.17093 | -0.04701 | 0.12614  | -0.01298 | -0.09959 | -0.10552 | -0.12355 | -0.09756 | -0.27255 | -0.20189 | -0.15821 | 0.19651  | 0.09683  | 0.39019  | 0.3253    | 0.32044  | 0.5421   |
| PF08_0032   | -0.92966 | -0.91527 | -0.46203 | -0.08604 | -0.03128 | 0.14677  | 0.32819  | 0.10875  | -0.13221 | -0.05132 | -0.22627 | -0.16971 | 0.23084  | 0.56879  | 0.74686  | 0.6377   | 0.57023  | 0.1004   | 0.25256  | -0.03478 | -0.3567  | -0.67344  | -1.06717 | -0.90796 |
| PFE0455w    | -0.12556 | -0.08066 | 0.30189  | 0.04503  | 0.2314   | 0.06912  | 0.02916  | -0.06056 | 0.07749  | 0.34834  | 0.48393  | 0.74188  | 0.69513  | 0.4485   | 0.33098  | 0.15697  | 0.25985  | 0.1094   | 0.09048  | 0.03079  | 0.01989  | 0.0727    | 0.25467  | 0.42447  |
| PFE0630c    | -0.98007 | -0.36702 | -0.1572  | 0.28294  | 0.39754  | 0.525    | 0.52003  | 1.06189  | 1.25522  | 0.9892   | 1.40051  | 1.3138   | 1.00558  | 0.46044  | 0.09748  | -0.32861 | -0.57495 | -0.75735 | -1.32679 | -1.35543 | -1.29543 | -1.34904  | -1.22918 | -1.11547 |
| PFB0880w    | -0.15862 | 0.15605  | 0.45296  | 0.43533  | 0.67078  | 0.41968  | 0.61405  | 1.30443  | 0.98739  | 0.72534  | 0.88035  | 0.43632  | 0.15147  | 0.05289  | -0.1702  | -0.27109 | -0.41219 | -0.279   | -0.36889 | -0.13562 | -0.1607  | -0.08414  | -0.04979 |          |
| MAL13P1.305 | 0.65318  | 0.90535  | 0.81454  | 0.85002  | 1.13276  | 1.06841  | 0.85443  | 0.99418  | 0.35222  | 0.11431  | 0.08027  | -0.10055 | -0.06872 | -0.22867 | -0.28235 | -0.27103 | -0.18652 | 0.0501   | 0.61836  | 0.62785  | 0.79912  | 0.78648   | 1.02503  | 1.12806  |
| PFF1360w    | 0.38357  | 0.2757   | 0.12212  | 0.51421  | 0.63278  | 0.54495  | 0.67594  | 1.17025  | 1.32558  | 1.43921  | 1.48688  | 1.2593   | 0.77951  | 0.22541  | 0.13621  | -0.03394 | -0.64267 | -0.33579 | -0.08448 | -0.19559 | -0.35203 | -0.41754  | -0.00753 | 0.11036  |
| MAL13P1.332 | -0.13819 | -0.44468 | -1.45548 | -0.73629 | -0.9286  | -0.82526 | -0.64698 | -0.40446 | -0.18735 | 0.13291  | 0.37079  | 0.46346  | 0.57226  | 0.36933  | 0.74728  | 0.58248  | 0.48964  | 0.16299  | 0.40623  | -0.11701 | -0.34266 | -0.36435  | -0.40196 | -0.52175 |
| PF07_0055   | 0.2546   | 0.01083  | 0.10111  | 0.03857  | 0.06412  | -0.05105 | -0.13284 | -0.13232 | -0.0167  | -0.03326 | -0.12783 | 0.01564  | 0.02672  | -0.08242 | -0.00645 | 0.04411  | 0.04772  | 0.12965  | 0.34355  | 0.43719  | 0.40728  | 0.21496   | 0.21196  | 0.2826   |
| PFD0340c    | 0.16656  | 0.08657  | 0.85044  | 0.05661  | 0.05122  | 0.00122  | 0.01023  | -0.13705 | 0.31006  | 0.40158  | 0.36059  | 0.55796  | 0.42171  | 0.40165  | 0.2329   | 0.09608  | 0.07136  | 0.19677  | 0.05852  | 0.14692  | 0.20762  | 0.18395   | 0.22558  | 0.23078  |
| PFL0345w    | 0.65066  | 0.51975  | 0.58298  | 0.7113   | 0.48859  | 0.40362  | 0.37655  | 0.13456  | 0.13686  | 0.41293  | 0.45663  | 0.66728  | 0.48463  | 0.38322  | 0.19089  | 0.05605  | 0.13481  | 0.17396  | -0.03815 | 0.24719  | 0.30506  | 0.40089   | 0.5      | 0.55724  |
| PF10_0004   | 0.41605  | 0.58408  | 1.21123  | 0.84014  | 0.43076  | 0.53086  | 1.397    | 0.73729  | 1.28184  | 1.00558  | 0.59565  | 0.53003  | 0.54866  | 0.41497  | 0.27235  | 0.15843  | -0.18388 | -0.39378 | -0.24279 | -0.20237 | -0.17243 | -0.17818  | -0.26817 | -0.15723 |
| PFD0290w    | -0.49172 | -0.72924 | -0.48007 | -0.35105 | -0.58158 | -0.41858 | -0.54142 | -0.60783 | -0.10201 | 0.35065  | 0.66903  | 1.04394  | 0.91879  | 0.82995  | 0.86302  | 0.7474   | 0.29637  | 0.4693   | 0.50021  | 0.20023  | -0.01009 | -0.10142  | -0.03955 | -0.1908  |
| PF10_0302   | 0.19409  | 0.27416  | 0.36468  | 0.42121  | 0.50179  | 0.37308  | 0.15845  | 0.15325  | -0.16048 | -0.09492 | 0.10658  | -0.25829 | -0.06    | -0.1337  | -0.0296  | -0.07578 | -0.0534  | 0.02781  | 0.7682   | 0.63598  | 0.82529  | 0.70466   | 1.06014  | 1.09927  |
| PFL0850w    | 0.15892  | 0.11096  | 0.51643  | 0.34499  | 0.42184  | 0.15577  | 0.08012  | 0.00631  | -0.16801 | -0.08244 | -0.17499 | -0.0573  | -0.04956 | -0.07168 | -0.09638 | -0.71231 | -0.20867 | 0.14808  | 0.03593  | 0.1023   | 0.19365  | 0.30844   | 0.46669  |          |
| PFF0305c    | 0.05558  | -0.01183 | -1.40382 | -0.0222  | -0.19507 | -0.252   | -0.63106 | -0.54167 | -0.549   | -0.73408 | -0.96218 | -1.17895 | -1.28688 | -1.33614 | -0.63679 | -0.16095 | 0.02682  | 0.13372  | 1.37605  | 0.54072  | 0.52224  | 0.70036   | 0.54658  | 0.51442  |
| PF14_0503   | -0.36661 | -0.12899 | -0.26406 | 0.29989  | 0.01329  | 0.27942  | 0.49449  | 0.81159  | 1.21261  | 0.8404   | 0.88762  | 0.84538  | 0.80583  | 0.50535  | 0.42334  | 0.38256  | 0.25846  | 0.13826  | 0.32828  | 0.11468  | 0.02816  | -0.08405  | 0.00946  | 0.00311  |
| PF14_0297   | -0.40343 | -0.51938 | -0.51131 | -1.26711 | -0.9149  | -0.82997 | -0.74001 | -0.42204 | 0.28496  | 0.77913  | 0.85905  | 0.92614  | 0.94353  | 0.6959   | 0.29941  | 0.18713  | 0.12813  | -0.19647 | -0.28991 | -0.67123 | -0.77518 | -0.63524  | -0.69792 | -0.81733 |
| PF14_0019   | 1.15153  | 2.57712  | 2.38416  | 3.10656  | 2.68824  | 2.47474  | 2.06361  | 1.34995  | 0.97318  | 0.45115  | 0.39633  | 0.37097  | 0.17244  | -0.08393 | -0.21865 | -0.2641  | -0.37265 | -0.22305 | -0.00858 | -0.07997 | 0.23517  | 0.41028   | 0.32096  | 0.30127  |
| PF10545w    | 0.16405  | -0.56827 | -0.31948 | -0.5098  | -0.64456 | -0.42039 | -0.47114 | -0.19966 | 0.11166  | 0.28726  | 0.23022  | 0.34766  | 0.41756  | 0.54674  | 0.57381  | 0.62711  | 0.34283  | 0.70467  | 0.60324  | 0.74778  | 0.5143   | -0.02207  | 0.12193  | 0.16891  |
| PFE1065w    | -0.79288 | -0.91949 | -0.20271 | -0.80152 | -0.89531 | -0.88441 | -0.89285 | -1.0421  | -0.39471 | 0.55325  | 0.68666  | 0.81595  | 0.9013   | 0.84877  | 0.68219  | 0.43089  | 0.22506  | 0.1924   | 1.30572  | -0.36447 | -0.51936 | -0.55764  | -0.54387 | -0.49359 |
| PF14_0601   | -0.38606 | -0.41019 | -0.47761 | -0.22914 | -0.38576 | -0.46072 | -0.54104 | -0.58241 | -0.26124 | 0.04397  | 0.53946  | 0.58976  | 0.5904   | 0.5727   | 0.58582  | 0.39241  | 0.12359  | 0.23952  | 0.25331  | -0.02685 | -0.2206  | -0.53062  | -0.73537 | -0.30202 |
| PF14_0242   | -1.05641 | -0.32803 | 0.08583  | 0.30411  | 0.22586  | 0.48207  | 0.59582  | -0.64319 | 0.83613  | 0.85244  | 0.94946  | 0.99047  | 0.85902  | 0.42772  | 0.36941  | -0.04063 | -0.27945 | -0.73852 | -1.04579 | -1.28681 | -1.39387 | -0.95373  | -0.99444 | -0.81156 |
| PFB0110w    | -0.94543 | -0.44125 | -0.83728 | -0.20457 | 0.20291  | 0.77388  | 1.48785  | 2.07787  | 2.05924  | 2.06567  | 1.97001  | 1.48925  | 0.90412  | 0.35317  | -0.12481 | -0.54675 | -0.83892 | -1.369   | -1.23522 | -1.34366 | -1.28295 | -1.36889  | -1.20634 | -1.02885 |
| PF14_0169   | -0.46897 | -0.53194 | -0.51225 | -0.59465 | -0.49696 | -0.36255 | -0.27676 | -0.40859 | 0.3923   | 0.32456  | 0.40582  | 0.68286  | 0.668    | 0.76474  | 0.79537  | 0.83325  | 0.61708  | 0.54362  | 0.59029  | 0.1939   | -0.12441 | -0.03232  | -0.13491 | -0.345   |
| MAL8P1.216  | 0.57498  | 0.9119   | 0.13561  | 1.08686  | 1.16048  | 0.98562  | 0.85205  | 1.01926  | 0.59392  | 0.6479   | 0.70027  | 0.6251   | 0.58292  | 0.46418  | 0.40472  | 0.29962  | -0.10174 | -0.02759 | 0.68586  | -0.25315 | -0.12339 | -0.07709  | -0.24066 | -0.22246 |
| PFB0500c    | -0.74207 | -0.74339 | -0.98443 | -1.12595 | -1.15856 | -0.87724 | -0.95443 | -0.54739 | -0.18964 | 0.00296  | 0.4921   | 0.34944  | 0.50767  | 0.27985  | 0.55235  | 0.58235  | 0.45807  | 0.52201  | 0.42591  | 0.17242  | -0.11096 | -0.72541  | -0.86956 | -1.12468 |
| PF14_0311   | 0.55671  | 0.36463  | 0.12533  | 0.01994  | -0.19253 | -0.21025 | -0.75793 | -0.50931 | -0.47745 | -0.65223 | -0.65955 | -0.34143 | -0.45591 | -0.40623 | 0.21518  | 0.68458  | 0.6515   | 0.95792  | 1.33591  | 1.12268  | 0.99881  | 0.60368   | 0.3818   | -0.06826 |
| PF10400c    | -0.72839 | -0.6227  | -0.70038 | -0.86466 | -0.86587 | -1.02541 | -1.01635 | -0.89662 | -0.58508 | -0.45028 | 0.10528  | 0.20024  | 0.55399  | 0.75613  | 0.65132  | 0.71488  | 0.55257  | 0.45873  | 0.36083  | 0.17909  | -0.03103 | 0.07565   | -0.14429 | -0.16911 |
| PF14_0611   | 0.05759  | 0.52401  | 0.28901  | 0.38807  | 0.61243  | 0.22523  | 0.20351  | 0.58714  | 0.70234  | 0.70593  | 0.56355  | 0.57202  | 0.19902  | -0.07378 | -0.41874 | -0.40177 | -0.21958 | 0.11591  | -0.00513 | 0.09241  | 0.01095  | 0.1764    | 0.28627  |          |
| PFE1290w    | 0.73323  | 0.79506  | 0.70474  | 1.01403  | 1.19676  | 1.24782  | 0.89494  | 1.0704   | 0.67392  | 0.49763  | 0.54617  | 0.4854   | 0.40371  | 0.10457  | 0.1152   | 0.0205   | -0.0373  | 0.03585  | 0.54987  | 0.27476  | 0.66119  | 0.49588   | 0.63281  | 0.6927   |
| PFC0260w    | 0.16309  | 0.64541  | -2.51767 | 0.67971  | 0.57282  | 0.42658  | 0.5818   | 0.76029  | 0.55833  | 0.38236  | -0.10698 | 0.38458  | 0.39541  | 0.30204  | 0.20258  | 0.16467  | 0.21909  | 0.25438  | 0.47232  | 0.32354  | 0.68021  | 0.58151   | 0.63056  | 0.56155  |
| PFL0940c    | -0.11709 | 1.44734  | 1.80408  | 0.81716  | 0.76204  | 0.62917  | 0.87105  | 0.35746  | 0.43713  | 0.37816  | -0.12287 | 0.19932  | 0.12636  | -0.0052  | -0.14806 | -0.11419 | 0.0846   | -0.21064 | -0.05848 | -0.0693  | 0.02591  | 0.06859   | 0.03584  | 0.07734  |
| PF11_0472   | 0.78313  | 0.23566  | 0.56442  | -0.10141 | -0.12599 | -0.21199 | -0.36499 | -0.94844 | -0.29089 | 0.2361   | 0.50435  | 0.83946  | 0.73722  | 0.32826  | 0.25274  | 0.05651  | -0.15713 | -0.06634 | 0.14969  | 0.13515  | -0.00222 | 0.01613   | 0.31316  | 0.54802  |
| PF10_0313a  | 0.09722  | 0.27839  | 0.27657  | -0.15386 | 0.09262  | -0.12987 | -0.23137 | 0.05302  | 0.19368  | 0.73536  | 0.80704  | 0.80197  | 0.69793  | 0.56055  | 0.34476  | 0.24897  | 0.05472  | 0.25104  | -0.01246 | 0.02995  | 0.1283   | -0.16306  | 0.02177  | -0.00255 |
| MAL7P1.100  | -0.17072 | -0.25187 | 0.23107  | 0.12468  | 0.57897  | 0.23325  | 0.59194  | 0.15393  | 0.19835  | 0.33666  | 0.39454  | 0.36055  | 0.24536  | 0.25273  | 0.02062  | 0.19469  | 0.07954  | 0.07587  | 0.25742  | 0.08552  | 0.23277  | 0.11707   | 0.36826  | 0.5353   |
| PF14_0049   | -0.25225 | -0.59164 | -2.17653 | 0.49005  | 0.48771  | 0.7535   | 0.57668  | 0.41222  | 0.3464   | 0.37504  | 0.21051  | 0.47086  | 0.11014  | 0.26375  | 0.33002  | 0.17298  | 0.01839  | 0.24895  | 0.39983  | 0.23362  | -0.06015 | 0.10903   | -0.08541 | -0.01896 |
| PF1130c     | 0.70063  | 0.82484  | 0.46875  | 1.20719  | 1.34634  | 1.29298  | 1.06303  | 1.23473  | 0.95951  | 1.01056  | 0.96612  | 0.88273  | 0.51729  | 0.22137  | -0.06932 | -0.17575 | -0.77508 | -0.60008 | 0.53301  | -0.57256 | -0.52306 | -0.15502  | 0.06022  | 0.39131  |
| PF11_0211   | 0.87576  | 0.71883  | 0.69455  | 1.11838  | 1.14167  | 1.09685  | 1.19854  | 0.84574  | 0.74965  | 0.40679  | 0.42722  | 0.22495  | 0.02491  | -0.0711  | -0.25677 | -0.20015 | -0.73422 | -0.65726 | -0.36711 | -0.23585 | 0.04356  | 0.33854</ |          |          |

|                     |          |          |          |          |          |          |          |          |          |          |          |          |          |          |          |          |          |          |          |          |          |          |          |          |
|---------------------|----------|----------|----------|----------|----------|----------|----------|----------|----------|----------|----------|----------|----------|----------|----------|----------|----------|----------|----------|----------|----------|----------|----------|----------|
| PF11 0456           | -0.0415  | -0.01931 | 0.64023  | 0.22329  | 0.11504  | 0.13134  | 0.17843  | -0.10238 | 0.52696  | 0.663    | 0.57855  | -0.02418 | 0.4541   | 0.54042  | 0.54617  | 0.35308  | 0.35927  | 0.09092  | -0.02237 | 0.10541  | 0.13638  | 0.14248  | 0.19121  | 0.28598  |
| PF11285w            | 1.89055  | 2.54367  | 2.53992  | 2.76622  | 2.27819  | 1.76587  | 2.18546  | 1.9142   | 0.98155  | 0.46574  | 0.00228  | -0.25495 | -0.63718 | -0.61055 | -0.69624 | -0.79294 | -1.17695 | -1.28663 | -0.68236 | -0.60199 | 0.01543  | 0.77043  | 0.83757  | 1.2454   |
| MAL13P1.200         | -0.8712  | -0.62069 | -0.5383  | -0.48723 | -0.12729 | 0.23377  | 0.23593  | 0.13897  | 0.92671  | 0.72674  | 1.03387  | 1.10931  | 1.03028  | 0.71494  | 0.5304   | 0.26809  | -0.02009 | -0.27962 | -0.18818 | -0.36293 | -0.51241 | -0.39579 | -0.41145 | -0.35493 |
| PFL0410w            | 0.59602  | -0.10988 | 1.08731  | -0.06115 | -0.00917 | -0.0124  | -0.1311  | -0.30981 | 0.218    | 0.00019  | -0.04827 | 0.27002  | 0.04134  | 0.08263  | -0.08177 | -0.21541 | 0.15464  | -0.0749  | 0.31769  | 0.31759  | 0.35973  | 0.41882  | 0.39299  | 0.41617  |
| PFE1340w            | 0.07823  | 0.75723  | 0.47023  | 0.87683  | 1.88819  | 1.78863  | 0.5884   | 0.5107   | 0.15343  | 0.25343  | 0.0955   | 0.25137  | 0.3876   | 0.2391   | 0.37495  | 0.5436   | 0.00192  | 0.36098  | -0.02541 | -0.52004 | -0.87705 | -0.4033  | -0.41601 | 0.19389  |
| MAL8P1.2            | -0.59984 | -0.59791 | -0.62059 | -0.13669 | 0.61334  | 1.93948  | 2.48552  | 2.84946  | 2.46372  | 1.762    | 1.32243  | 0.63311  | 0.22974  | -0.19217 | -0.30574 | -0.52949 | -0.93985 | -0.73138 | -0.50313 | -0.81736 | -0.83679 | -0.5671  | -0.62497 | -0.49428 |
| MAL7P1.215          | -0.29052 | -0.34847 | -2.2026  | 0.43311  | 0.21203  | -0.12615 | 0.64622  | 0.66216  | 0.85008  | 0.59379  | 0.75909  | 0.64982  | 0.72633  | 0.56152  | 0.48213  | 0.41834  | 0.065    | 0.1583   | -0.09366 | -0.24246 | -0.2532  | -0.44315 | -0.29895 | -0.26843 |
| PF11635w            | 0.24285  | 0.2826   | 1.5953   | 1.77457  | 0.61518  | 0.60892  | 0.59272  | 0.21973  | 0.21059  | 0.56402  | 0.24551  | 0.59708  | 0.56245  | 0.47148  | 0.28003  | 0.26538  | 0.10788  | 0.09595  | 0.00622  | -0.04113 | -0.22674 | -0.00934 | -0.05014 | 0.1563   |
| PFA0640c            | -0.37228 | -0.41968 | 0.47016  | -0.14671 | 0.14195  | 0.36921  | 0.50499  | 0.4712   | 0.73118  | 1.04376  | 0.83523  | 0.8909   | 0.76889  | 0.54879  | 0.30796  | 0.24897  | 0.10096  | 0.07083  | 0.05063  | 0.03184  | 0.09758  | 0.15108  | 0.11016  | 0.21862  |
| PF14 0284           | 0.23777  | 0.10472  | 0.48931  | 0.1612   | -0.09811 | 0        | -0.15422 | -0.27396 | -0.02538 | 0.01676  | -0.19364 | 0.02664  | -0.02549 | 0.00958  | -0.01742 | 0.00197  | 0.16616  | 0.35723  | 0.64365  | 0.428    | 0.36437  | 0.38776  | 0.47049  | 0.29219  |
| PFE1165c            | -0.16295 | -0.27081 | -0.46983 | -0.71378 | -0.43878 | -0.64074 | -0.71933 | -0.68364 | -0.86732 | -0.78015 | -0.3163  | -0.42792 | -0.04472 | -0.0254  | 0.4315   | 0.46383  | 0.36185  | 0.37369  | 0.65234  | 0.21067  | 0.24669  | -0.01774 | 0.02275  | 0.11197  |
| MAL13P1.240         | 0.74515  | 0.44484  | 0.27534  | 0.0311   | -0.00604 | -0.12016 | -0.23417 | -0.43609 | -0.63126 | -0.60127 | -0.523   | -0.51433 | -0.34295 | -0.2473  | 0.06933  | 0.40508  | 0.74011  | 0.6582   | 0.59702  | 0.97314  | 1.00771  | 0.63909  | 0.44178  | 0.31798  |
| PF11587c            | 0.06915  | -0.35703 | -0.12376 | -0.34161 | -0.31231 | 0.05323  | -0.21415 | 0.16491  | 0.18326  | 0.61695  | 0.65938  | 0.70376  | 0.43036  | 0.1541   | 0.25197  | -0.02175 | -0.06182 | -0.00709 | -0.00647 | 0.07928  | 0.20295  | 0.02194  | 0.107    | 0.03285  |
| PF08 0017           | -0.18883 | -0.09922 | -0.37384 | -0.17249 | 0.31991  | 0.30494  | 0.34668  | 0.21809  | 0.22208  | 0.2226   | 0.21659  | 0.07678  | 0.26537  | 0.19736  | 0.14572  | -0.02764 | 0.15873  | 0.00597  | -0.0617  | 0.37105  | 0.54796  | 0.61763  | 1.03831  | 0.93142  |
| PF13 0052           | 0.18773  | 0.15246  | -0.11143 | 0.26907  | 0.38699  | 0.26565  | 0.11417  | 0.26403  | 0.2281   | 0.34247  | 0.46342  | 0.45688  | 0.32657  | 0.18871  | 0.06457  | -0.05691 | -0.17138 | -0.49449 | 0.00136  | -0.07832 | -0.04988 | 0.06704  | 0.19279  | 0.49968  |
| PF10 0313           | -0.24737 | -0.36625 | 0.12809  | -0.47859 | -0.24025 | -0.56404 | -0.41873 | -0.3797  | 0.04281  | 0.63565  | 0.59493  | 0.81102  | 0.78629  | 0.75638  | 0.65411  | 0.51338  | 0.21663  | 0.20755  | 0.21038  | 0.12338  | -0.09751 | -0.14812 | -0.26332 | -0.49597 |
| PF11 0134           | 0.02019  | 0.17061  | 0.7076   | 0.16562  | 0.07892  | 0.21168  | 0.02107  | 0.0818   | 0.38599  | 0.65185  | 0.54743  | 0.84978  | 0.55505  | 0.34921  | 0.11283  | 0.15482  | 0.07136  | 0.12503  | 0.3227   | 0.11444  | 0.37669  | 0.12964  | 0.15023  | 0.37489  |
| PF11075w            | -1.01784 | -0.23445 | 0.42987  | -0.15195 | -0.1143  | 0.03197  | -0.19583 | -0.40056 | 0.24915  | 0.63773  | 0.62425  | 0.90607  | 0.85753  | 0.70252  | 0.70907  | 0.4153   | 0.04624  | -0.12175 | 0.03445  | -0.47475 | -0.31692 | -0.17083 | -0.24066 | -0.21736 |
| PF14 0682           | 0.02499  | 0.32149  | 0.09724  | -0.01034 | -0.03955 | -0.05995 | -0.19416 | -0.18567 | -0.33834 | -0.44836 | -0.21695 | -0.28862 | -0.34412 | -0.28085 | -0.03005 | 0.20503  | 0.44983  | 0.30808  | 0.78543  | 0.46509  | 0.31211  | 0.22318  | 0.38073  | 0.30105  |
| PF14 0669           | 1.12263  | 1.28232  | 1.34342  | 1.53646  | 1.35138  | 1.5621   | 1.08724  | 1.47603  | 1.30814  | 1.11335  | 0.99303  | 0.74574  | 0.56087  | 0.30801  | 0.00336  | -0.30899 | -0.62114 | -0.56609 | -0.7109  | -0.61546 | -0.23728 | 0.25529  | 0.61114  | 0.78771  |
| PFL0385c            | 0.21187  | 0.75923  | 1.08602  | 0.65286  | 0.66309  | 0.9076   | 0.72277  | 0.90614  | 0.73736  | 0.80815  | 0.58244  | 0.73462  | 0.51517  | 0.30693  | 0.14838  | 0.10521  | 0.12425  | 0.09649  | 0.11805  | 0.10848  | 0.33869  | 0.59619  | 0.58866  | 0.57746  |
| PFC0815c            | 0.32351  | 0.39512  | 0.21187  | 0.2981   | 0.15801  | -0.13008 | -0.01461 | 0.15475  | -0.17027 | -0.16349 | -0.22708 | -0.14184 | -0.07483 | -0.10079 | -0.11312 | -0.02045 | 0.11254  | 0.33557  | 0.3266   | 0.37231  | 0.55634  | 0.49601  | 0.34414  | 0.40056  |
| PFB0960c            | -1.65568 | -1.57431 | -1.32676 | -1.5341  | -1.19797 | 0.39667  | 2.14838  | 3.10688  | 2.75929  | 2.50762  | 2.06814  | 1.55243  | 1.04263  | 0.43335  | -0.05269 | -0.53346 | -1.16759 | -1.5423  | -0.96932 | -1.55064 | -1.7986  | -1.60282 | -1.53162 | -1.71368 |
| MAL13P1.246         | 0.74873  | 0.11987  | 0.81079  | 0.02466  | -0.12883 | -0.19521 | -0.36776 | -0.48458 | -0.51345 | -0.18932 | -0.23206 | -0.26607 | -0.06223 | -0.17147 | -0.22121 | -0.33567 | 0.15796  | 0.13236  | 0.40644  | 0.50345  | 0.6477   | 0.66297  | 0.64759  | 0.52227  |
| PF10 0407           | 0.0687   | 0.14985  | 0.33737  | 0.09389  | -0.0713  | -0.2012  | -0.10987 | -0.01011 | 0.49218  | 0.67348  | 0.54385  | 0.72019  | 0.71182  | 0.57672  | 0.33502  | 0.17133  | 0.16867  | 0.04785  | -0.00979 | 0.04078  | 0.23626  | 0.36514  | 0.23275  | 0.4309   |
| MAL7P1.23           | -0.57638 | -0.92119 | -2.23235 | -0.79439 | -0.7683  | -0.68274 | -0.5844  | -0.3704  | 0.15124  | 0.22566  | 0.31492  | 0.3712   | 0.68945  | 0.7064   | 0.78254  | 0.78008  | 0.64918  | 0.00947  | -0.12325 | 0.02539  | -0.32384 | -0.48008 | -0.52809 | -0.59036 |
| PF11 0449           | 0.9545   | 1.21952  | 0.90003  | 1.4185   | 1.1516   | 1.04537  | 1.17767  | 0.71174  | 0.55481  | 0.13377  | 0.2676   | -0.07177 | -0.06197 | -0.15223 | -0.35808 | -0.15251 | 0.2129   | 0.10085  | 0.1898   | 0.25122  | 0.13815  | 0.32834  | 0.61294  | 0.73903  |
| PFE1205c            | 0.69506  | 0.3531   | -0.05862 | 0.14295  | 0.02468  | -0.18077 | -0.43154 | -0.46384 | -0.78217 | -0.67988 | -0.61779 | -0.45203 | -0.51925 | -0.46205 | 0.04431  | 0.34085  | 0.66411  | 0.27796  | 1.7118   | 1.09646  | 1.04453  | 0.60256  | 0.80866  | 0.56883  |
| PF0895w             | -0.15107 | -0.38827 | -0.22214 | -0.28479 | -0.50108 | -0.30561 | -0.59316 | -0.54628 | -0.9624  | -1.02325 | -0.77964 | -0.62441 | -0.18697 | -0.00794 | 0.61682  | 0.76174  | 0.32457  | 0.66363  | 0.892    | 0.25402  | 0.32062  | 0.17033  | 0.12791  | 0.03583  |
| PF14 0707           | 0.69753  | 1.1129   | 1.33919  | 1.3344   | 1.35316  | 1.10749  | 1.05034  | 1.17772  | 0.79737  | 0.56554  | 0.3141   | -0.01728 | -0.48111 | -0.72704 | -1.07158 | -1.27218 | -1.20399 | -1.15563 | -1.06914 | -0.38541 | 0.0068   | 0.37326  | 0.70155  | 0.79808  |
| PF11 0355           | -0.49951 | -0.38236 | -0.62153 | -0.66593 | -0.65534 | -0.78136 | -0.6843  | -0.24997 | 0.1128   | 0.33146  | 0.65811  | 0.66547  | 0.63642  | 0.54941  | 0.49151  | 0.43206  | 0.06421  | 0.21811  | -0.0779  | -0.27721 | -0.42666 | -0.57178 | -0.38616 | -0.23579 |
| MAL13_tRNA_Ar<br>g2 | 0.95433  | 1.77508  | 0.60091  | 0.99645  | 0.94283  | 1.27155  | 0.68043  | 1.38258  | 0.55936  | 0.2259   | 0.33786  | 0.1394   | -0.20871 | -0.18317 | -0.34549 | -0.10308 | -0.83406 | 0.72027  | -0.35454 | -0.07947 | -0.06661 | 0.66257  | 0.27578  | -0.02634 |
| PF11 0426           | 0.15368  | -0.04288 | 0.21297  | 0.05134  | 0.07957  | 0.0771   | 0.02179  | 0.05442  | 0.21175  | 0.3619   | 0.43757  | 0.51288  | 0.56689  | 0.4558   | 0.41039  | 0.41763  | 0.31749  | 0.0866   | 0.65627  | 0.27268  | 0.27338  | 0.1137   | 0.13615  | 0.05301  |
| PF10 0050           | -0.48611 | -0.6278  | -0.70955 | -0.97093 | -0.78848 | -0.80204 | -0.831   | -0.74152 | -0.32524 | -0.21081 | -0.01235 | -0.10968 | 0.131    | 0.18825  | 0.63992  | 0.70438  | 0.56298  | 0.29762  | 0.58802  | 0.27106  | 0.18677  | -0.22687 | -0.30718 | -0.45256 |
| PFL0455c            | -0.08709 | 0.18813  | 0.39283  | 0.44328  | 0.52071  | 0.79534  | 0.59218  | 0.52916  | 0.73758  | 0.79857  | 0.72384  | 0.79498  | 0.6213   | 0.51941  | 0.35302  | 0.16773  | 0.00407  | -0.07806 | 0.02078  | -0.10768 | -0.07354 | 0.07723  | 0.13085  | 0.45411  |
| PF13 0104           | -0.33659 | -0.23439 | -0.37897 | -0.23521 | 0.19595  | 0.55014  | 0.39225  | 0.16885  | -0.21671 | 0.39918  | 0.17672  | -0.002   | 0.21214  | 0.20496  | 0.08091  | 0.15946  | 0.07469  | 0.11553  | 0.0924   | 0.09883  | 0.21467  | 0.63801  | 0.25699  | 0.91322  |
| PF14 0705           | 0.03288  | -0.05859 | 0.1101   | -0.41746 | -0.43127 | -0.68942 | -0.2249  | 0.85509  | 1.42239  | 1.34626  | 1.27384  | 1.21504  | 0.95564  | 0.45455  | 0.31484  | 0.18923  | -0.00441 | -0.08042 | 0.06532  | 0.04149  | 0.09562  | -0.0453  | -0.2685  | -0.25142 |
| PF14 0292           | 0.86591  | 1.53669  | 1.17037  | 1.28695  | 1.3374   | 1.39547  | 1.28366  | 1.11935  | 1.21103  | 0.9283   | 0.75454  | 0.44592  | 0.20568  | -0.15068 | -0.32937 | -0.55343 | -0.69593 | -0.80171 | -0.83021 | -0.76559 | -0.23946 | 0.29994  | 0.4076   | 0.66256  |
| PF07 0050           | 0.13859  | 0.57814  | 0.64487  | 0.81385  | 0.84324  | 1.80661  | 0.9839   | 1.0094   | 0.85687  | 0.79601  | 0.71207  | 0.7765   | 0.66254  | 0.43517  | 0.32968  | 0.18101  | -0.06328 | 0.05688  | -0.37491 | -0.21119 | -0.15585 | -0.40157 | -0.29875 |          |
| PF10 0226           | -0.48024 | -0.17259 | -0.48445 | -0.34563 | -0.30878 | -0.34481 | -0.34853 | -0.11031 | 0.0574   | -0.14332 | 0.5093   | 0.5814   | 0.63664  | 0.45062  | 0.5762   | 0.42898  | 0.29408  | 0.39298  | 0.09268  | 0.06615  | 0.14251  | -0.2581  | -0.11682 | -0.08681 |
| PFL1805c            | 0.64423  | 0.49582  | 0.28253  | 0.28425  | 0.28844  | 0.12384  | -0.12813 | 0.12053  | 0.0921   | 0.32416  | 0.23747  | 0.30683  | 0.1325   | -0.0704  | -0.05521 | -0.01054 | 0.21578  | 0.58008  | 0.62298  | 0.59093  | 0.57786  | 0.477    |          |          |

|               |          |          |          |          |          |          |          |          |          |          |          |          |          |          |          |          |          |          |          |          |          |          |          |          |
|---------------|----------|----------|----------|----------|----------|----------|----------|----------|----------|----------|----------|----------|----------|----------|----------|----------|----------|----------|----------|----------|----------|----------|----------|----------|
| PF14 0575     | -0.54205 | -0.64336 | -2.62121 | -0.01376 | -0.6035  | -0.40606 | -0.40603 | -0.11204 | 0.52393  | 0.68624  | 0.72224  | 0.75072  | 0.60736  | 0.46909  | 0.50612  | 0.2776   | -0.20158 | 0.06692  | 0.08083  | -0.24731 | -0.39046 | -0.17812 | -0.19991 | -0.12582 |
| PFF0265c      | -0.31914 | -0.14267 | -0.32072 | -0.48259 | -0.36212 | -0.20811 | -0.73181 | -0.70606 | -0.60389 | -0.55601 | 0.05188  | -0.04513 | 0.24424  | 0.20901  | 0.62818  | 0.65516  | 0.4849   | 0.5577   | 0.62208  | 0.61285  | 0.26577  | -0.23446 | -0.25914 | -0.3295  |
| PF10 0235     | -0.48032 | -0.34395 | -0.31572 | -0.57624 | -0.60451 | -0.51032 | -0.38941 | -0.16688 | 0.61439  | 0.78937  | 0.85513  | 0.90828  | 0.94682  | 0.68919  | 0.68785  | 0.48661  | 0.08919  | 0.14875  | -0.03626 | -0.21026 | -0.43319 | -0.27089 | -0.29848 | -0.31269 |
| PF11 0505     | 0.35045  | 1.50323  | 1.93129  | 2.67921  | 3.43378  | 3.22456  | 1.89609  | 1.49579  | 0.17678  | -0.49626 | -0.9747  | -2.11874 | -2.96191 | -3.49325 | -3.51603 | -4.02555 | -3.44005 | -4.10354 | -3.57424 | -2.70591 | -1.69937 | -0.79565 | -0.06824 | 0.79218  |
| PFL0785c      | 0.0258   | 0.5744   | 0.63128  | 0.786    | 0.67382  | 0.6554   | 0.48591  | 0.46525  | 0.01702  | -0.28782 | -0.14876 | -0.23155 | -0.00432 | -0.19929 | 0.26075  | 0.07318  | 0.00954  | -0.4432  | 0.59475  | -0.39378 | -0.25105 | -0.06866 | 0.3058   | -0.12892 |
| PFD0950w      | -0.31308 | 0.03958  | -0.17341 | 0.11689  | -0.01671 | -0.21268 | -0.13491 | -0.22855 | 0.0607   | -0.40224 | 0.10795  | 0.313    | 0.32539  | 0.24723  | 0.38951  | 0.10877  | -0.01131 | -0.24041 | -0.68124 | -0.56145 | -0.39598 | -0.81508 | -0.51337 | -0.69878 |
| PFF0130c      | 0.74897  | 1.28916  | 1.40552  | 1.13108  | 0.91196  | 0.93506  | 0.66617  | 0.43225  | 0.57071  | 0.61043  | 0.57098  | 0.75039  | 0.58925  | 0.33118  | 0.2341   | 0.10342  | -0.0592  | -0.18371 | 0.09458  | -0.0937  | -0.00601 | 0.34915  | 0.38824  | 0.56218  |
| PFI0445c      | 0.3893   | 0.16963  | 0.56556  | 0.06446  | 0.16067  | -0.14483 | -0.17088 | -0.09993 | -0.29322 | -0.1799  | -0.23333 | -0.17564 | -0.25579 | -0.31255 | -0.28595 | -0.33458 | -0.27074 | -0.38016 | 0.46468  | 0.33978  | 0.32811  | 0.18059  | 0.42599  | 0.29347  |
| MAL13P1.149   | 0.63593  | 0.55142  | 0.90738  | 0.93167  | 1.11234  | 0.97924  | 0.74478  | 0.74653  | 0.64202  | 0.45964  | 0.45958  | 0.34727  | 0.33069  | 0.14878  | 0.03708  | 0.08005  | -0.09733 | -0.20752 | -0.05221 | 0.00231  | 0.21533  | 0.15216  | 0.14626  | 0.2696   |
| PF1165c       | 0.33011  | 0.27681  | 0.39595  | 0.74043  | 0.51892  | 0.48691  | 0.33854  | 0.40821  | 0.37411  | 0.2774   | 0.40275  | 0.40897  | 0.43762  | 0.20803  | 0.21372  | 0.11939  | 0.10355  | 0.10201  | 0.41958  | 0.09536  | 0.20601  | -0.09666 | -0.05497 | 0.26655  |
| PF11 0330     | -0.53606 | -0.23217 | -0.67172 | -0.02782 | 0.0378   | 0.22976  | -0.04534 | 0.09501  | -0.06727 | 0.1691   | 0.32391  | 0.36464  | 0.17024  | 0.17154  | 0.18738  | 0.29097  | 0.18952  | 0.05972  | 0.067    | -0.26992 | -0.18509 | -0.12848 | -0.2843  | -0.36745 |
| PFF1245c      | -0.39362 | -0.19176 | -0.13348 | 0.04351  | 0.07877  | 0.22016  | 0.14553  | 0.21416  | 0.29619  | 0.04646  | 0.45089  | 0.66805  | 0.51578  | 0.42433  | 0.52529  | 0.52968  | 0.17838  | 0.22173  | 0.2476   | -0.10899 | -0.24944 | -0.64284 | -0.35802 | -0.52442 |
| MAL13P1.299   | 0.1373   | 0.44556  | 0.34715  | 0.67424  | 0.69184  | 0.71433  | 0.69877  | 0.85325  | 0.81869  | 0.64455  | 0.73256  | 0.6768   | 0.45611  | 0.28666  | 0.15366  | 0.14158  | -0.36962 | -0.21614 | 0.04622  | -0.37845 | -0.55971 | -0.32481 | -0.19407 | 0.14448  |
| PF14 0626     | 0.04083  | -0.18833 | 0.16359  | -0.1267  | -0.35071 | -0.30628 | -0.32319 | 0.01454  | 0.28789  | 0.33864  | 0.23401  | 0.32493  | 0.3351   | 0.52966  | 0.30752  | 0.17358  | 0.23411  | -0.27208 | 1.29403  | 0.33045  | 0.31914  | 0.11341  | 0.10783  | -0.01405 |
| PF14 0763     | 1.96182  | 2.37715  | 2.3041   | 2.25673  | 1.85707  | 1.71993  | 1.43011  | 0.75116  | 0.83793  | 0.65226  | 0.43061  | 0.27166  | -0.03909 | -0.14609 | -0.47501 | -0.45827 | -0.69714 | -1.06189 | -0.71955 | -0.50782 | -0.24089 | 0.4771   | 0.59967  | 0.58733  |
| PFF1050w      | -0.02569 | 0.08004  | 0.09756  | 0.48849  | 0.46506  | 0.67938  | 0.37367  | 0.84634  | 1.17052  | 0.89978  | 0.98388  | 1.149    | 0.62833  | 0.11783  | -0.31312 | -0.5933  | -1.32026 | -1.28828 | -1.33681 | -1.46053 | -1.16798 | -0.82856 | -0.48412 | -0.39646 |
| PFF0085w      | 0.12547  | -0.14633 | -0.00069 | -0.12718 | -0.59256 | -0.67689 | -0.45934 | -0.32174 | 0.02873  | 0.31886  | 0.49041  | 0.49114  | 0.4282   | 0.39583  | 0.2205   | 0.32142  | 0.28534  | 0.26297  | 0.38956  | 0.30955  | 0.34715  | 0.54616  | 0.47338  | 0.40742  |
| PFF0985c      | 1.85788  | 1.02271  | 0.79345  | 0.37064  | 0.34403  | -0.26543 | -0.44404 | -0.78787 | -0.82198 | -0.84898 | -0.58922 | -0.90115 | -0.67769 | -0.68826 | -0.39633 | 0.00182  | -0.50032 | 0.09082  | 1.21528  | 1.1345   | 1.4783   | 0.97095  | 1.26669  | 1.23884  |
| PF14 0073     | 0.27383  | 0.52851  | -0.22528 | 0.71381  | 0.85138  | 0.37311  | 0.12024  | 0.01663  | 0.20955  | 0.26535  | 0.28419  | 0.51797  | 0.63733  | 0.61523  | 0.46492  | 0.24586  | -0.02033 | 0.0718   | -0.2208  | -0.16342 | 0.1502   | -0.24655 | 0.08624  | 0.32232  |
| PFC0940c      | 0.29649  | -0.057   | -0.22708 | -0.47807 | -0.59665 | -0.86341 | -0.7382  | -0.97259 | -0.85479 | -0.70152 | -0.5433  | -0.40477 | -0.22899 | -0.1419  | -0.35287 | 0.0067   | 0.36258  | 0.35198  | 0.62344  | 0.95835  | 0.84796  | 0.3936   | 0.7732   | 0.53352  |
| PF10 0121     | 0.78725  | 0.93619  | 1.30059  | 0.77725  | 0.99236  | 0.71163  | 0.64959  | 0.78476  | 0.77531  | 0.76172  | 0.60261  | 0.66448  | 0.62556  | 0.23664  | 0.17208  | 0.07719  | 0.16177  | 0.07942  | 0.25519  | 0.4161   | 0.18009  | 0.34428  | 0.45868  |          |
| PFL1370w      | -0.5663  | -1.049   | -0.65329 | -1.1441  | -1.25329 | -1.08271 | -1.23481 | -1.24048 | -0.85923 | -1.13171 | -0.38829 | -0.01236 | 0.4813   | 0.53522  | 0.86072  | 0.94156  | 0.56383  | 0.78504  | 0.47005  | 0.27936  | 0.22985  | 0.27239  | -0.08371 | -0.78947 |
| PF14 0634     | 0.59259  | 0.67694  | 1.72849  | 0.89484  | 0.84072  | 0.68487  | 0.8199   | 1.51162  | 1.51101  | 1.21499  | 0.87505  | 0.71705  | 0.4718   | 0.19848  | -0.042   | -0.19876 | -0.34012 | -0.19778 | -0.2638  | -0.05803 | -0.04268 | 0.00594  | 0.08044  | 0.16842  |
| PFF1285w      | 0.44988  | 0.64766  | 0.78019  | 0.56097  | 0.50614  | 0.22506  | 0.39626  | 0.35399  | 0.57678  | 0.58727  | 0.37525  | 0.47283  | 0.39495  | 0.25443  | 0.25507  | 0.16157  | 0.33934  | 0.30883  | 0.31492  | 0.4063   | 0.57302  | 0.27633  | 0.12545  | 0.21458  |
| PF13 0256     | 0.25187  | 0.69878  | 0.7007   | 0.83521  | 0.83789  | 0.65211  | 0.59619  | 0.74038  | 0.30192  | 0.41143  | 0.40287  | 0.26034  | 0.26824  | 0.0246   | 0.21546  | 0.18518  | 0.16313  | 0.04945  | 0.29292  | 0.16912  | 0.23848  | 0.12224  | 0.16841  | 0.35388  |
| PFE0240w      | -0.21018 | -0.2753  | -0.31615 | -0.16725 | -0.33381 | -0.23467 | -0.35412 | -0.46227 | -0.49858 | -0.61496 | -0.47232 | -0.32561 | 0.20267  | 0.28935  | 0.64292  | 0.7222   | 0.81749  | 0.58658  | 0.51011  | 0.36534  | 0.09191  | -0.09479 | -0.15673 | -0.09984 |
| PFL1675c      | 0.09221  | 0.54887  | 0.19387  | 0.74349  | 1.06585  | 1.04127  | 1.0683   | 1.09769  | 0.89582  | 0.533    | 0.52258  | 0.39281  | 0.44464  | 0.2086   | 0.01804  | 0.01655  | -0.02948 | 0.11225  | -0.00633 | 0.10559  | 0.19341  | 0.78189  | 0.4188   | 0.52156  |
| PF11 0080     | -0.01629 | 0.10104  | 1.09754  | 0.2961   | 0.50341  | 0.53725  | 0.49279  | 0.11652  | 0.35152  | 1.27424  | 1.08633  | 1.0186   | 1.02292  | 0.96816  | 0.78211  | 0.57191  | 0.18336  | 0.49389  | 0.03926  | 0.14449  | 0.74489  | -0.14536 | 0.52916  | 0.01982  |
| PFL1045w      | -1.23862 | -2.05859 | -1.79552 | -0.42812 | -0.39147 | -0.07949 | 0.89415  | 1.00163  | 1.20019  | 0.69081  | 0.8187   | 0.68813  | 0.56108  | 0.6311   | 0.48969  | 0.21741  | 0.02984  | 0.05969  | -0.1757  | -0.5266  | -0.73655 | -0.65593 | -0.92707 | -0.92244 |
| PFE1350c      | -0.52088 | -0.35397 | 0.00557  | 0.07578  | -0.16514 | -0.07919 | -0.27079 | -0.1534  | -0.07779 | -0.04622 | 0.32619  | 0.20382  | 0.37356  | 0.37535  | 0.37888  | 0.47447  | 0.25317  | 0.12082  | 0.19739  | -0.30147 | -0.52488 | -0.56708 | -0.38626 | -0.48482 |
| PF14 0248     | -0.73756 | -0.63009 | -0.75427 | -0.86748 | -0.94055 | -1.09698 | -1.30211 | -1.62203 | -1.44236 | -1.2615  | -0.69716 | -0.53219 | -0.08058 | -0.01221 | 0.63984  | 0.67858  | 0.88255  | 0.40009  | 0.51453  | 0.14716  | 0.35883  | -0.26503 | -0.36998 | -0.47234 |
| PF11 0434     | -0.20565 | 0.3043   | 0.27614  | -0.2258  | 0.73566  | 0.74936  | 0.96085  | 1.13487  | 0.8569   | 0.50958  | 0.66704  | 0.60237  | 0.36714  | 0.37778  | 0.2399   | 0.23472  | 0.08803  | 0.25354  | 0.1836   | 0.05056  | 0.13734  | -0.17126 | -0.27137 | -0.16427 |
| PFI0350c      | 0.01333  | 0.1822   | 0.58359  | 0.29074  | 0.33367  | 0.79868  | 0.83503  | 0.76008  | 1.05461  | 0.96236  | 0.9272   | 0.87     | 0.74134  | 0.39729  | 0.47064  | 0.105    | -0.24107 | -0.41619 | -0.6571  | -0.74084 | -0.56859 | -0.54386 | -0.26062 | -0.19616 |
| PF14 0778     | 0.96559  | 0.69728  | 0.36223  | 0.55654  | 0.31287  | 0.38735  | -0.07658 | 0.04213  | 0.05667  | -0.07166 | -0.40261 | -0.36802 | -0.26796 | -0.40513 | -0.0908  | 0.09019  | 0.23506  | 0.36751  | 0.66566  | 1.03499  | 0.7584   | 0.7257   | 0.73143  | 0.82465  |
| PFL1185c      | -0.63176 | 0.14681  | 0.30347  | 0.83939  | 0.98735  | 1.14502  | 1.21233  | 1.30864  | 0.9254   | 0.77783  | 0.73348  | 0.28774  | 0.16714  | -0.20129 | -0.51159 | -0.32705 | -0.72117 | -1.03708 | -0.75816 | -0.86161 | -0.66984 | -0.88201 | -0.51493 | -0.26615 |
| PFC10 API0037 | 0.02395  | -0.83939 | -1.20496 | -0.98907 | -0.73915 | -1.05067 | -0.75061 | -0.36829 | -0.80763 | -0.20062 | -0.06671 | -0.36955 | -0.61728 | 0.07801  | 0.10082  | 0.58815  | 0.40506  | 0.68065  | 0.13276  | 0.38423  | 0.24905  | 0.69344  | -0.22916 | -0.16625 |
| MAL7P1.154    | -1.05179 | -0.46975 | -0.39171 | -0.69475 | -0.79009 | -0.74996 | -0.68566 | -0.7293  | -0.50495 | -0.14785 | 0.19874  | 0.30459  | 0.64014  | 0.42559  | 0.6083   | 0.55767  | 0.24086  | 0.25027  | 0.3626   | -0.17096 | -0.2428  | -0.2058  | -0.1612  | -0.28241 |
| MAL8P1.59     | -0.18833 | -0.18354 | 0.05864  | -0.10375 | -0.36673 | -0.05876 | -0.08571 | -0.07872 | 0.96445  | 0.92924  | 1.01501  | 1.13409  | 0.76056  | 0.71841  | 0.66453  | 0.56149  | 0.10122  | 0.26882  | 0.14816  | -0.07813 | -0.19531 | -0.29458 | -0.28804 | -0.34611 |
| PF1100w       | 1.20884  | 0.12557  | -0.68459 | 0.22752  | 0.30389  | 0.03205  | -0.2024  | -0.21393 | -0.38208 | 0.23633  | 0.56396  | 0.63763  | 0.59886  | 0.49171  | 0.22629  | -0.03372 | -0.14573 | -0.04649 | 0.36798  | 0.54664  | 0.72636  | 0.97378  | 0.95094  | 0.95786  |
| PFI1225w      | 0.75218  | 0.69851  | -0.46709 | 0.64851  | 0.30898  | 0.49597  | 0.85285  | 0.54012  | 0.38448  | 0.1474   | 0.20531  | 0.23244  | 0.20073  | 0.02617  | 0.14141  | 0.11067  | 0.10574  | 0.09841  | 0.74248  | 0.27179  | 0.39062  | 0.55365  | 0.53144  | 0.61272  |
| PFC0750w      | -0.03606 | 0.1991   | 0.17571  | 0.34971  | 0.44211  | 0.16245  | 0.23422  | 0.54784  | 0.42532  | 0.57023  | 0.53529  | 0.67657  | 0.53076  | 0.44399  | 0.12535  | 0.17177  | 0.16473  | 0.14513  | 0.22684  | 0.15041  | 0.24078  |          |          |          |

|               |          |          |          |          |          |          |          |          |          |          |          |          |          |          |          |          |           |          |          |          |          |          |          |          |  |
|---------------|----------|----------|----------|----------|----------|----------|----------|----------|----------|----------|----------|----------|----------|----------|----------|----------|-----------|----------|----------|----------|----------|----------|----------|----------|--|
| PF1345c       | 0.66264  | 0.14146  | -0.15967 | -0.19205 | -0.19336 | -0.35268 | -0.29502 | -0.58396 | -0.51297 | -0.28538 | -0.5286  | -0.3364  | -0.41728 | -0.41833 | -0.45352 | -0.45287 | 0.21053   | 0.70236  | 0.64417  | 0.63621  | 0.51336  | 0.12605  | 0.12692  | 0.14639  |  |
| PF07_0051     | 0.01806  | 0.80641  | 0.41015  | 1.06611  | 0.85125  | 1.16141  | 1.56587  | 1.02915  | 1.2736   | 1.18552  | 0.64934  | 0.56339  | 0.3622   | 0.36504  | 0.05     | 0.13241  | -0.11143  | -0.19869 | -0.28268 | -0.25777 | -0.17312 | -0.17468 | -0.29666 | -0.2192  |  |
| PFL2090c      | -0.00602 | -0.65334 | -1.55678 | -0.61189 | -0.8897  | -0.57124 | -0.48156 | -0.96144 | -1.00896 | -0.95692 | -0.69654 | -0.73018 | -0.19355 | -0.12862 | 0.30367  | 0.67279  | -1.74277  | 0.48179  | 1.31906  | 0.73152  | 0.55789  | 0.2847   | 0.21507  | -0.31321 |  |
| PFD0505c      | 0.32579  | 0.58681  | 0.36347  | 0.48039  | 0.47294  | 0.44086  | 0.47878  | 0.25885  | 0.36848  | 0.27561  | 0.33753  | 0.37113  | 0.30861  | 0.25473  | 0.25053  | 0.23796  | 0.09882   | -0.10095 | -0.07382 | -0.38584 | -0.30457 | -0.13242 | -0.02991 | 0.12088  |  |
| PF13_0021     | -1.62983 | -1.78354 | -1.62246 | -1.75661 | -1.6978  | -1.57013 | -1.15241 | -0.53755 | 0.00627  | 0.31273  | 0.79786  | 0.95009  | 0.94553  | 0.70245  | 0.7637   | 0.40808  | 0.11291   | -0.31269 | -0.24598 | -0.75976 | -0.74476 | -0.91871 | -1.10939 | -1.20938 |  |
| MAL13P1.175   | -0.09163 | -0.37553 | -3.38759 | -0.20714 | -0.38829 | -0.37239 | -0.42591 | -0.52957 | -0.97225 | -1.44014 | -1.56149 | -1.71149 | -1.53736 | -1.34488 | 0.221    | 0.7924   | 1.11315   | 0.96263  | 1.25379  | 0.8952   | 0.74204  | 0.41278  | 0.19959  | -0.21313 |  |
| PFA0105w      | -0.46746 | -0.89058 | -0.13756 | -0.52234 | -0.36056 | 0.24282  | 0.51694  | 1.42068  | 1.42359  | 1.32857  | 0.98303  | 0.95439  | 0.52856  | 0.11953  | -0.06493 | -0.27266 | -1.14212  | -0.5773  | -0.64447 | -0.52213 | -0.5432  | -0.75555 | -0.75801 | -1.00484 |  |
| PFF1005w      | 0.71498  | 1.16762  | 0.8676   | 1.45954  | 1.35304  | 1.45186  | 1.37856  | 1.35918  | 1.10968  | 0.78027  | 0.6667   | 0.30829  | 0.39359  | 0.09796  | 0.09695  | -0.08144 | -0.04585  | 0.19536  | 0.48019  | 0.09801  | 0.71612  | 0.15239  | 0.51686  | 0.42061  |  |
| PF10_0203     | -1.42443 | -1.19559 | -0.99565 | -1.16611 | -1.05134 | -0.78397 | -0.92736 | -0.8259  | -1.03626 | -0.68646 | -0.54812 | -0.36675 | -0.23873 | -0.18834 | 0.40488  | 0.57059  | 0.83306   | 0.5628   | 0.87603  | -0.03456 | -0.566   | -1.00115 | -1.12622 | -0.89324 |  |
| PFI0045c      | 0.13999  | 0.58301  | 0.6704   | 0.55717  | 0.37769  | 0.53649  | 1.11242  | 0.28662  | 1.04977  | 1.03363  | 0.73016  | 0.55872  | 0.64716  | 0.42884  | 0.17981  | -0.13479 | -0.08585  | -0.25903 | -0.21903 | -0.21374 | -0.10792 | -0.30969 | -0.24314 |          |  |
| PFC0215c      | -0.50687 | -0.59066 | -1.12174 | -0.57456 | -0.4029  | -0.45062 | -0.61457 | -0.57135 | -0.53066 | -0.24781 | -0.07054 | 0.24137  | 0.39575  | 0.50334  | 0.4492   | 0.41571  | 0.52638   | 0.44787  | 0.24147  | 0.15665  | 0.01865  | 0.15648  | 0.01495  | 0.06961  |  |
| PF07_0099     | 0.34312  | 0.91638  | 0.95802  | 1.3466   | 1.32716  | 1.51425  | 1.25378  | 1.26704  | 0.70553  | 1.14261  | 1.22826  | 1.04909  | 0.65287  | 0.27315  | 0.07065  | -0.2009  | -0.16296  | -0.68943 | -0.55052 | -0.24651 | -0.45076 | -0.11793 | 0.32087  | 0.56189  |  |
| PFL1360c      | -0.27768 | -0.63868 | -0.01365 | -0.65567 | -0.71697 | -0.70438 | -0.71043 | -0.86426 | 0.01512  | 0.32564  | 0.4131   | 0.59755  | 0.62052  | 0.55532  | 0.40377  | 0.38997  | 0.37499   | 0.19338  | 0.30769  | 0.55772  | 0.37374  | -0.15696 | 0.46929  | 0.43286  |  |
| PFC0441c      | 0.86347  | 0.39306  | 0.38334  | 0.75265  | 0.78378  | 0.89002  | 0.91574  | 1.21665  | 1.05482  | 0.88205  | 1.23954  | 1.29268  | 0.74431  | 0.50535  | 0.18421  | 0.02176  | -0.081539 | -0.29959 | -0.07215 | -0.43873 | -0.39797 | -0.27731 | 0.10377  | 0.26586  |  |
| PF14_0585     | -0.58921 | -0.15003 | -0.0558  | -0.12104 | -0.05043 | 0.02069  | -0.11102 | 0.19993  | -0.00575 | 0.40541  | 0.57666  | 0.2819   | 0.42722  | 0.06741  | 0.08602  | -0.0388  | -0.26144  | -0.47414 | -0.45234 | -1.2096  | -1.3251  | -0.97    | -1.01455 | -0.60767 |  |
| PF14_0179     | -1.04034 | -1.36959 | -0.60909 | -1.5035  | -1.28674 | -1.14961 | -1.17779 | -0.72602 | -1.0989  | -1.50058 | -0.56401 | -0.75047 | -0.11904 | 0.01642  | -0.18632 | -1.17931 | -0.36582  | -1.5077  | -1.5938  | -0.41285 | -0.55685 | -0.8317  | -0.00533 | -0.74893 |  |
| PFB0620w      | -0.60691 | -0.15581 | -0.00892 | 0.45628  | 0.79159  | 0.88731  | 0.89403  | 1.09613  | 1.12958  | 1.1828   | 1.3787   | 1.29968  | 0.92295  | 0.36195  | 0.28131  | -0.16875 | -0.57696  | -1.00331 | -0.85665 | -1.0936  | -0.84737 | -0.60995 | -0.52137 | -0.25692 |  |
| MAL13P1.55    | 0.49743  | 0.89337  | 1.16528  | 0.99936  | 1.40443  | 1.79329  | 1.96222  | 1.91263  | 1.66861  | 1.22876  | 1.12137  | 0.88611  | 0.68003  | 0.34384  | 0.208    | -0.08204 | -0.39273  | -0.31944 | -0.42553 | -0.63558 | -0.57282 | -0.39011 | -0.10536 | 0.35117  |  |
| PF11_0451     | 0.44627  | 0.17599  | 0.65437  | 0.40093  | 0.47481  | 0.30969  | 0.21331  | 0.12983  | 0.11296  | 0.14507  | 0.06965  | 0.18026  | 0.06689  | 0.12392  | -0.02332 | -0.01381 | -0.17444  | 0        | 0.11529  | 0.21293  | 0.22668  | 0.25882  | 0.45214  | 0.48737  |  |
| PF10_0076     | 0.06252  | 0.19891  | 0.46112  | 0.54693  | 0.88462  | 0.18954  | 0.31751  | 1.11596  | 1.11626  | 0.66904  | 0.67555  | 0.58262  | 0.47274  | 0.26272  | -0.02396 | -0.01516 | -0.05273  | 0.0471   | -0.14589 | 0.08809  | 0.31945  | 0.33914  | 0.36613  | 0.36696  |  |
| PF11_0056     | 1.64238  | 1.17645  | 0.73048  | 0.48612  | 0.58914  | 0.18969  | 0.1991   | -0.00136 | -0.27616 | -0.1347  | -0.08799 | -0.15336 | -0.00308 | -0.23975 | -0.2575  | -0.32163 | -0.16202  | 0.22306  | 0.87963  | 0.55887  | 1.25311  | 1.06336  | 0.63321  | 1.16175  |  |
| PFL1460c      | 0.48007  | 0.44673  | 0.08406  | 0.51942  | 0.4851   | 0.44119  | 0.45087  | 0.36762  | 0.41488  | -0.23386 | 0.19206  | 0.0167   | 0.01092  | -0.00483 | 0.0605   | 0.1086   | 0.32493   | 0.35637  | 1.29599  | 0.68152  | 0.73958  | 0.34476  | 0.87683  | 0.46872  |  |
| PF11_0476     | 0.55002  | 0.57592  | 0.71858  | 0.51547  | 0.20597  | 0.31654  | 0.19008  | 0.24626  | 0.12446  | 0.32082  | 0.47725  | 0.60994  | 0.43633  | 0.28289  | 0.12266  | 0.14608  | 0.08741   | 0.29112  | 0.05104  | 0.19501  | 0.17458  | 0.35485  | 0.28935  | 0.18215  |  |
| PF07_0098     | 0.28955  | 0.59425  | 1.02285  | 0.90631  | 0.87909  | 1.38194  | 1.03356  | 0.69543  | 0.63697  | 0.69671  | 0.60458  | 0.74317  | 0.65485  | 0.38417  | 0.35899  | 0.12576  | -0.10029  | -0.30796 | -0.03466 | -0.0574  | -0.09328 | 0.13619  | 0.34977  | 0.63784  |  |
| PF10_0317     | -0.37513 | -0.60101 | 0.29871  | -0.3259  | -0.00707 | 0.37048  | 0.48137  | 0.27969  | -0.02287 | 0.00151  | 0.30057  | 0.30061  | 0.33757  | 0.35328  | 0.70584  | 0.61757  | 0.39144   | 0.09207  | 0.49082  | -0.2473  | -0.59797 | -0.42838 | -0.57125 | -0.59033 |  |
| PF14_0085     | 0.77606  | 1.08668  | 1.55219  | 1.35702  | 1.47887  | 0.89633  | 1.31475  | 0.89213  | 1.14701  | 0.74434  | 0.55575  | 0.29799  | 0.24867  | 0.31089  | 0.054    | -0.09534 | -0.35476  | 0.07722  | -0.22662 | 0.09658  | 0.29556  | 0.23104  | 0.53779  | 0.83091  |  |
| PF07_0130     | -0.21102 | 0.5711   | 0.30813  | 0.47352  | 0.74329  | 0.62876  | 0.65502  | 0.71698  | 0.15329  | 0.11866  | 0.09613  | -0.12981 | 0.11712  | 0.24592  | 0.41817  | 0.61214  | 0.49105   | 0.53785  | 0.58335  | 0.32835  | 0.47486  | 0.20042  | 0.02076  | 0.02146  |  |
| PFF0015c      | -0.73538 | -1.22003 | -1.55525 | -1.17143 | -1.03199 | -1.10494 | -0.72942 | -0.65708 | -0.83944 | -0.87331 | -0.81433 | -0.92854 | -0.74679 | -1.10048 | -1.11911 | -1.09429 | -0.52546  | -0.89452 | -0.68352 | -1.009   | -0.9165  | -0.91651 | -0.99445 | -1.1727  |  |
| PF10_API008:t |          |          |          |          |          |          |          |          |          |          |          |          |          |          |          |          |           |          |          |          |          |          |          |          |  |
| RNA           | 0.88093  | 0.34758  | -0.49056 | -0.03369 | 0.10811  | 0.16136  | -0.04952 | 0.54047  | 0.15567  | 0.00835  | -0.06517 | 0.19309  | -0.20148 | -0.07338 | 0.02141  | 0.44924  | 0.16538   | 0.99099  | 0.6377   | 0.63492  | 0.43065  | 0.83022  | 0.33163  | 0.14944  |  |
| MAL13P1.147   | -0.60057 | -0.68676 | -0.56695 | -0.77394 | -0.4606  | -0.68836 | -0.87783 | -0.8214  | -0.60881 | -0.35082 | -0.01688 | 0.19398  | 0.47164  | 0.5641   | 0.75156  | 0.77871  | 0.55664   | 0.3848   | 0.0682   | 0.31695  | -0.04986 | -0.52527 | -0.50072 | -0.77365 |  |
| PF14_0684     | -0.16833 | 0.21212  | 0.41965  | 0.40461  | 0.58184  | 0.89324  | 0.65818  | 0.51427  | 0.28307  | 0.18994  | 0.23262  | 0.06153  | 0.11681  | 0.00365  | -0.13746 | -0.2173  | -0.03808  | 0.01289  | -0.31029 | 0.25622  | 0.58155  | 0.65483  | 0.87477  | 0.68957  |  |
| PF14_0216     | 0.15959  | -0.20753 | -1.10704 | -0.35725 | -0.76224 | -0.49355 | -1.29703 | -0.70037 | -0.38987 | -0.11742 | -0.00175 | 0.33798  | 0.39767  | 0.44025  | 0.59099  | 0.78365  | 0.103704  | 0.7441   | 1.15512  | 0.89907  | 0.57661  | 0.27747  | 0.45049  | -0.10521 |  |
| MAL8P1.46     | 0.52141  | 0.33876  | 0.62989  | 0.90609  | 0.88782  | 0.39435  | 0.22742  | 0.1861   | 0.09712  | 0.0432   | 0.11696  | 0.14863  | -0.08345 | -0.1007  | -0.52212 | -0.32876 | -0.27406  | -0.11507 | 0.12654  | 0.03723  | 0.42165  | 0.01972  | 0.32104  | 0.42601  |  |
| PFC0545c      | 0.39705  | 0.79891  | 0.53002  | 0.65989  | 0.69426  | 0.46253  | 0.22052  | 0.07216  | -0.28315 | -0.40915 | -0.29024 | -0.30576 | -0.20369 | -0.27019 | -0.02538 | 0.05443  | -0.13303  | 0.17107  | 0.21555  | -0.09621 | -0.11601 | -0.05402 | 0.16312  | 0.26491  |  |
| PFI0560c      | -0.03491 | -0.25048 | 0.33192  | 0.40474  | 0.43846  | 0.39293  | 0.33901  | 0.2041   | 0.10568  | 0.18786  | 0.41758  | 0.48575  | 0.45453  | 0.15403  | 0.20618  | 0.22571  | 0.25618   | 0.29904  | 0.58402  | 0.45752  | 0.37547  | 0.58565  | 0.74089  | 0.64872  |  |
| PF11_0453     | 0.05851  | 0.38079  | 0.13909  | 0.44715  | 0.84224  | 0.90667  | 1.12836  | 1.51094  | 1.37048  | 1.05992  | 1.03059  | 0.94576  | 0.80081  | 0.55429  | 0.25258  | 0.11464  | -0.23294  | 0.01779  | -0.08282 | -0.29611 | -0.18063 | -0.18296 | -0.31483 | -0.28335 |  |
| PF14_0134     | 0.27254  | -0.05644 | 0.19134  | -0.05629 | -0.34484 | -0.3635  | -0.43972 | -0.54223 | -0.25909 | 0.06921  | -0.02806 | 0.14677  | 0.25253  | 0.28836  | 0.38054  | 0.28726  | 0.36371   | 0.4895   | 0.22885  | 0.35029  | 0.0327   | -0.03632 | 0.03519  | -0.02005 |  |
| PFE0615w      | -0.30421 | -0.1837  | -0.25092 | 0.03063  | 0.37731  | 1.11679  | 2.1805   | 1.97417  | 1.86477  | 1.35875  | 0.58048  | 0.43996  | 0.32605  | 0.14706  | -0.18013 | -0.21847 | -0.44657  | -0.53184 | -0.24927 | -0.19082 | -0.10763 | -0.24583 | -0.0693  | -0.39431 |  |
| PF07_0096     | 0.71355  | 0.47727  | 0.56138  | -0.00325 | 0.00924  | -0.18822 | -0.29386 | -0.3786  | -0.53059 | -0.3416  | -0.15067 | -0.04936 | -0.29806 | -0.01897 | 0.07029  | 0.05593  | 0.28181   | 0.35063  | 0.49566  | 0.33945  | 0.30345  | -0.04044 | 0.15684  | 0.28205  |  |
| PF14_0579     | -0.4504  | 0.37516  | 0.57882  | 0.637    | -0.23045 | 0.72898  | 0.45557  | 0.39044  | 0.83621  | 0.34827  | 0.46785  | 0.94784  | 0.1491   | -0.1803  | -0.17214 | -0.48034 | -0.9073   | -1.3789  | -0.9832  | -1.9003  | -1.875   | -1.05049 | -0.82422 | -0.93619 |  |
| PF14_0199     | 0.3924   | -0.10591 | 0.32081  | 0.43375  | 0.34052  | 0.07873  | 0.05623  | -0.01428 | -0.11165 | 0.01223  | -0       |          |          |          |          |          |           |          |          |          |          |          |          |          |  |

|                |          |          |          |          |          |          |          |          |          |          |          |          |          |          |          |          |          |          |          |          |          |          |          |          |
|----------------|----------|----------|----------|----------|----------|----------|----------|----------|----------|----------|----------|----------|----------|----------|----------|----------|----------|----------|----------|----------|----------|----------|----------|----------|
| PF10_0300      | 0.61232  | 1.10057  | 1.38331  | 1.21308  | 1.46412  | 1.52378  | 1.25244  | 1.40216  | 0.75505  | 0.72821  | 0.83592  | 0.70956  | 0.05716  | -0.3833  | -0.29232 | -0.55397 | -0.78672 | -0.71689 | -0.75691 | -1.44369 | -0.54646 | -0.58022 | -0.32568 | 0.28896  |
| MAL7P1.69      | -0.09098 | 0.40319  | -0.19816 | 0.22402  | 0.23003  | 0.08895  | 0.14799  | 1.41467  | 0.99332  | 1.0644   | 1.10818  | 0.89767  | 0.86045  | 0.50617  | 0.4598   | 0.23846  | -0.09725 | -0.05572 | 0.01911  | -0.34469 | -0.34863 | -0.19062 | -0.42461 | -0.3764  |
| PF13_0317      | 0.26816  | 0.13566  | 0.14192  | 0.40994  | 0.23892  | 0.26868  | 0.11243  | 0.23702  | 0.33239  | 0.36369  | 0.66797  | 0.71864  | 0.80924  | 0.63     | 0.43411  | 0.43029  | 0.07824  | 0.11156  | 0.57738  | 0.50177  | 0.5642   | -0.16048 | 0.36255  | 0.37309  |
| PFB0501c       | -0.11667 | -0.37265 | -0.28656 | -0.26817 | -0.28643 | -0.35954 | -0.60534 | -0.53501 | -0.22238 | 0.15997  | 0.41289  | 0.48072  | 0.53126  | 0.42463  | 0.53151  | 0.55763  | 0.46161  | 0.34018  | 0.68413  | 0.39701  | 0.23119  | -0.01397 | 0.01661  | 0.02518  |
| PFA0500w       | -0.6628  | -0.04527 | 0.03839  | -0.1324  | -0.12175 | -0.03823 | -0.05732 | 0.32614  | 0.34562  | 0.28707  | 0.46412  | 0.50209  | 0.68455  | 0.30239  | 0.47705  | 0.27437  | -0.01344 | -0.27754 | -0.49284 | -0.77375 | -1.01912 | -0.94945 | -0.66036 | -0.3573  |
| PF14_0417      | -1.52374 | -1.38227 | -1.89386 | -1.24356 | -0.96725 | -0.71271 | -0.34578 | -0.00937 | 0.37488  | 0.61656  | 0.62679  | 0.75674  | 1.00025  | 0.89599  | 0.68273  | 0.31907  | 0.06299  | -0.00672 | -0.129   | -0.53404 | -0.94913 | -0.72335 | -1.09352 | -1.02338 |
| PDF1055w       | -0.45185 | 0.39009  | 0.32831  | 0.39977  | 0.38127  | 0.84981  | 0.62556  | 0.13297  | 0.10596  | 0.34525  | 0.18977  | 0.49608  | 0.59174  | 0.35391  | -0.13895 | 0.03022  | -0.5694  | -0.58688 | -0.99508 | -1.95109 | -1.63839 | -1.08716 | -0.91286 | -0.50583 |
| PF02040c       | -0.38739 | -0.26279 | -0.20877 | -0.13333 | -0.34271 | -0.1089  | -0.11135 | -0.13575 | 0.10422  | 0.26083  | 1.11215  | 1.03357  | 1.08766  | 0.7674   | 0.82142  | 0.44217  | 0.17748  | -0.07395 | 0.02423  | -0.50752 | -0.4135  | -0.3852  | -0.19137 | -0.27577 |
| PF13330c       | -0.23678 | 0.20759  | 0.23368  | 0.15238  | 0.15241  | 0.3207   | 0.3845   | 0.37757  | 0.61084  | 0.67254  | 1.06009  | 1.16051  | 0.99431  | 0.62225  | 0.66374  | 0.52545  | 0.03561  | 0.27341  | 0.07918  | -0.43979 | -0.5587  | -0.48622 | -0.50951 | -0.25413 |
| PF11_0100      | 0.08751  | 0.22934  | 0.23254  | 0.29018  | 0.27307  | 0.11639  | 0.17976  | 1.11912  | 0.86741  | 0.34515  | 0.61496  | 0.68475  | 0.49163  | 0.26478  | 0.3372   | 0.16469  | 0.0472   | -0.05104 | 0.2762   | -0.12145 | -0.0854  | 0.02631  | -0.01059 | -0.00322 |
| PF14_0180      | -0.58377 | -0.54068 | -0.20552 | 0.11714  | 0.42994  | 0.73612  | 0.8708   | 0.74324  | 0.73433  | 0.68978  | 0.52589  | 0.71414  | 0.70393  | 0.46322  | 0.49815  | 0.33123  | 0.30288  | 0.07022  | 0.02126  | -0.13304 | -0.38976 | -0.45389 | -0.4717  | -0.01404 |
| PFL0805w       | 0.5113   | 0.64517  | 0.97942  | 0.83247  | 0.94654  | 0.76812  | 0.58217  | 0.53563  | 0.26212  | 0.42434  | 0.53226  | 0.57784  | 0.50858  | 0.34855  | 0.14624  | 0.14675  | -0.00917 | -0.05411 | 0.04615  | 0.06072  | 0.17329  | 0.1137   | 0.05988  | 0.22902  |
| PF10_0252      | -0.91812 | -1.15093 | -0.08313 | -1.01233 | -1.21937 | -1.38373 | -1.5445  | -1.16003 | -0.83964 | -0.2203  | 0.73936  | 0.86532  | 1.01802  | 0.61329  | 0.67431  | 0.42016  | 0.10131  | -0.07873 | -0.31311 | -0.27778 | -0.65171 | -0.32526 | -0.3023  | -0.50811 |
| PFC0990c       | 0.11695  | 0.54814  | -0.13109 | 0.61088  | 0.61461  | 0.57297  | 0.70326  | 0.52674  | -0.14072 | 0.18763  | 0.21373  | 0.26718  | 0.09479  | 0.15771  | 0.24345  | 0.30731  | 0.20958  | 0.51902  | 0.32749  | 0.39361  | 0.29515  | 0.31655  | 0.29667  | 0.53298  |
| PFE1590w       | -1.97841 | -1.41643 | -1.02556 | -0.88363 | -0.78237 | -0.14598 | 0.40099  | 1.03254  | 1.52784  | 1.636    | 1.20971  | 1.0206   | 0.66734  | 0.61056  | 0.03798  | -0.34026 | 0.2669   | -1.05441 | -1.28149 | -2.24947 | -2.43465 | -1.54007 | -2.00203 | -1.71416 |
| PFI0955w       | 0.1785   | -0.07703 | 0.7175   | -0.10504 | -0.19847 | -0.34858 | -0.41236 | -0.50755 | -0.1181  | -0.45571 | -0.47447 | 0.09595  | -0.09856 | 0.07727  | 0.1671   | 0.33624  | 0.43636  | 0.43894  | 0.92123  | 0.63232  | 0.49853  | 0.32022  | 0.242    | 0.18904  |
| PF1135c        | 0.48267  | 0.71664  | 0.43305  | 0.84241  | 0.5921   | 1.20254  | 1.55539  | 1.31367  | 1.1496   | 0.86494  | 0.67708  | 0.58201  | 0.34584  | 0.25959  | 0.031746 | 0.1694   | -0.11963 | -0.09723 | 0.20881  | -0.13369 | 0.04966  | 0.28861  | 0.20307  | 0.34691  |
| PF1175c        | -0.15053 | 0.518    | 0.24967  | -0.02086 | 0.02568  | -0.14215 | -0.23925 | -0.13972 | -0.09634 | 0        | 1.49885  | 0.24833  | 0.30308  | 0.24512  | 0.09817  | -0.198   | -0.66342 | -0.33245 | -0.75551 | -0.84457 | -0.75012 | -0.39556 | -0.41416 | -0.4217  |
| PF14_0378      | -1.39978 | -0.69962 | -0.42231 | -0.37668 | -0.34498 | -0.27228 | -0.36528 | -0.48674 | -0.20971 | 0.12485  | 0.55726  | 0.75632  | 0.68282  | 0.63319  | 0.39656  | 0.28626  | -0.52356 | -0.40429 | -1.09225 | -1.54729 | -1.6711  | -1.96942 | -1.87796 | -1.7135  |
| PF0645c        | 0.47317  | -0.41796 | -0.4373  | -0.29856 | -0.34988 | -0.73302 | -0.78998 | -1.34352 | -0.9591  | -2.38784 | -1.32947 | -1.65733 | -1.79925 | -1.50861 | -1.58461 | -0.34349 | 0.54054  | 0.74305  | 1.02729  | 1.57782  | 1.52688  | 1.0421   | 1.3007   | 0.66843  |
| PF14_0435      | 0.01059  | -0.04787 | -0.10469 | -0.18402 | -0.00314 | -0.18258 | -0.34659 | -0.35125 | -0.31849 | -0.20681 | -0.09149 | 0.078    | 0.09861  | 0.33791  | 0.30431  | 0.50757  | 0.74432  | 0.42272  | 0.32749  | 0.20461  | 0.0619   | 0.01644  | -0.00028 | -0.0168  |
| PF1605w        | 0.38663  | 0.65441  | 0.56426  | 0.74863  | 0.75013  | 0.73534  | 0.66306  | 0.51584  | 0.576    | 0.59905  | 0.51565  | 0.38045  | 0.41367  | 0.19551  | 0.10465  | 0.05045  | 0.05433  | 0.09575  | 0.11216  | 0.2592   | 0.4256   | 0.23524  | 0.30779  | 0.46051  |
| PFL0085c       | -0.35616 | -0.39319 | -0.41785 | -0.37022 | -0.37535 | -0.57606 | -0.52142 | -0.19717 | -0.1531  | -0.36676 | 0.28429  | 0.44452  | 0.48673  | 0.54448  | 0.52203  | 0.54744  | 0.35448  | 0.65704  | 0.49286  | 0.12826  | 0.08115  | -0.34689 | -0.3213  | -0.0375  |
| PFB1045w       | 0.60247  | 0.19378  | -0.36318 | 0.05639  | -0.20215 | -0.49615 | 0.37599  | 0.58633  | 0.5565   | 1.13223  | 0.94473  | 0.53678  | 0.36683  | 0.56786  | 0.1418   | 0.32629  | 0.13227  | 0.04108  | 0.26177  | -0.02653 | -0.01776 | -0.05366 | -0.06608 | 0.038    |
| PFI1455w       | 0.5569   | 0.70033  | 0.7638   | 0.51433  | 0.48335  | 0.5224   | 0.29132  | 0.82201  | 0.71932  | 0.66509  | 0.52946  | 0.65529  | 0.45987  | 0.2524   | 0.09864  | 0.15518  | 0.13242  | 0.3352   | -0.10525 | 0.11778  | -0.16221 | 0.14852  | 0.35895  | 0.24476  |
| PFI1380c       | 0.64447  | 1.00107  | 1.06052  | 1.3526   | 1.382    | 1.27134  | 1.28276  | 0.96191  | 0.60278  | 0.42839  | 0.39353  | 0.11036  | 0.1115   | -0.06458 | -0.24219 | -0.35572 | -0.13278 | -0.03322 | 0.03672  | 0.3676   | 0.84179  | 0.96138  | 1.28045  | 1.54675  |
| MAL8P1.69      | -0.68947 | -0.70011 | -0.74708 | -0.56369 | -0.71769 | -1.08746 | -1.14606 | -0.97904 | -1.23099 | -0.51877 | -0.2714  | -0.19661 | 0.28453  | 0.48438  | 0.89866  | 0.75511  | 0.23513  | 0.12551  | -0.14616 | -0.2328  | -0.52643 | -0.56106 | -0.39663 | -0.58423 |
| PF14_0757      | 1.20985  | 1.08834  | 0.19436  | 0.98341  | 0.99512  | 1.11908  | 1.02982  | 1.52771  | 0.99114  | 0.60257  | 0.34303  | 0.19596  | -0.12118 | 0.11842  | 0.25916  | 0.37325  | -0.00475 | 0.49216  | 0.8973   | 0.00046  | 0.36674  | 0.51434  | -0.13064 | 0.31928  |
| PF10_API0054:t |          |          |          |          |          |          |          |          |          |          |          |          |          |          |          |          |          |          |          |          |          |          |          |          |
| RNA            | 0.29594  | 0.38528  | -0.06438 | -0.51884 | -0.71138 | -0.68536 | -0.68015 | -0.34767 | -0.41569 | -0.08782 | -0.12866 | 0.13636  | -0.145   | 0.07738  | 0.20478  | 0.60964  | 0.41677  | 0.76598  | 0.80526  | 0.33978  | 0.11532  | 0.43676  | -0.06971 | -0.41717 |
| MAL8P1.134     | 0.15737  | -0.42087 | -0.51755 | -0.7112  | -0.6281  | -0.60706 | -0.39071 | -0.70673 | -0.82966 | -1.02799 | -1.25948 | -1.22903 | -0.86834 | -0.18808 | 0.30449  | 0.70455  | 1.05642  | 0.77338  | 1.2861   | 1.13263  | 0.97477  | 0.353    | 0.20354  | -0.17575 |
| PF11_0431      | 0.05383  | -0.15641 | 0.465    | 0.36485  | 0.34554  | 0.46227  | 0.37024  | 0.28826  | 0.17166  | 0.1241   | 0.24039  | 0.16088  | 0.1311   | 0.05686  | -0.03578 | -0.15223 | -0.21946 | 0.09124  | 0.23564  | 0.26654  | 0.46232  | 0.53068  | 0.76795  | 0.81249  |
| PF10_API0048:t |          |          |          |          |          |          |          |          |          |          |          |          |          |          |          |          |          |          |          |          |          |          |          |          |
| RNA            | 1.13655  | 0.83768  | 0.41621  | 0.56275  | 0.70082  | 0.62037  | 0.20934  | 0.97048  | 0.06838  | -0.63104 | -0.5821  | -0.73768 | -0.95139 | -0.66646 | -0.67928 | 0.00243  | -0.50832 | 0.53173  | 1.2648   | 0.30362  | 0.76187  | 1.23096  | 0.62225  | 0.68403  |
| PFF0560c       | 0.14092  | 0.33333  | 0.07047  | 0.53408  | 0.41125  | 0.27296  | 0.25501  | 0.24213  | 0.34315  | 0.46957  | 0.469    | 0.49649  | 0.4224   | 0.50604  | 0.35089  | 0.19222  | 0.23704  | 0.12837  | -0.08815 | -0.06925 | -0.10874 | -0.20447 | -0.02442 | 0.03048  |
| PF11_0404      | -0.41352 | -0.50321 | -0.0158  | 0.3701   | 0.89395  | 1.49269  | 1.64359  | 1.26117  | 1.38317  | 1.8111   | 0.94256  | 0.73656  | 0.43655  | 0.28821  | -0.21339 | -0.54241 | -0.59099 | -0.67102 | -1.09019 | -0.76019 | -0.54892 | -0.45161 | -0.39777 | -0.22853 |
| PFL1720w       | -1.08646 | -1.40158 | -1.98123 | -1.66025 | -2.05981 | -1.91495 | -1.91358 | -1.82665 | -1.57562 | -1.36866 | -0.50618 | -0.13434 | 0.34282  | 0.50726  | 0.93719  | 1.03217  | 0.53671  | 0.83328  | 0.62208  | -0.17765 | -0.55626 | -0.72032 | -0.96322 | -1.18784 |
| PFI0965w       | -1.06535 | -0.48221 | -0.32842 | -0.2037  | 0.03015  | 0.46969  | 0.66182  | 0.9243   | 0.93469  | 1.10004  | 1.16068  | 1.10691  | 0.87477  | 0.41779  | 0.22575  | -0.12048 | -0.41332 | -0.72495 | -0.85116 | -0.9631  | -1.04049 | -1.07173 | -1.00466 | -0.63056 |
| PF08_0047      | 0.54321  | 0.67846  | 0.84098  | 0.9123   | 0.95238  | 0.76842  | 0.57642  | 0.41499  | -0.10094 | -0.13062 | -0.39882 | -0.49859 | -0.6496  | -0.87761 | -0.69058 | -0.48797 | -0.21814 | -0.40486 | 0.31187  | 0.08035  | 0.20657  | 0.47213  | 0.78513  | 0.5936   |
| PF14_0388      | 0.644    | 0.37351  | -0.22747 | -0.03994 | -0.57499 | -0.67742 | -0.74788 | -0.87224 | -1.02497 | -1.17297 | -1.2003  | -1.26494 | -1.50769 | -1.36917 | -0.76182 | 0.02285  | 0.59449  | 0.67503  | 1.54918  | 1.04029  | 1.14103  | 1.03814  | 0.9634   | 0.37634  |
| PF13_0226      | 0.65224  | 0.00133  | 0.05871  | 0.1801   | 0.06398  | 0.01899  | -0.13863 | -0.51568 | -0.70523 | -0.74736 | -0.5862  | -0.6323  | -0.58581 | -0.59358 | -0.35909 | 0.12199  | 0.5293   | 0.38607  | 1.51628  | 1.10935  | 1.38959  | 0.87015  | 1.15917  | 1.00177  |
| PFF1025c       | -1.47774 | -0.77983 | -0.33169 | -0.35582 | -0.28428 | 0.41842  | 0.71667  | 1.24515  | 1.33684  | 1.63033  | 1.4041   | 1.21351  | 0.76491  | -0.08618 | -0.82772 | -1.2234  | -1.82604 | -2.07395 | -2.05802 | -2.27479 | -1.98531 | -1.46177 | -1.32951 | -1.20929 |
| PF11_0438      | -0.1853  | 0.3264   | 0.7019   | 0.4677   |          |          |          |          |          |          |          |          |          |          |          |          |          |          |          |          |          |          |          |          |

|             |          |          |          |          |          |          |          |          |          |          |          |          |          |          |          |          |          |          |          |          |          |          |          |          |         |
|-------------|----------|----------|----------|----------|----------|----------|----------|----------|----------|----------|----------|----------|----------|----------|----------|----------|----------|----------|----------|----------|----------|----------|----------|----------|---------|
| PF14 0314   | -0.01612 | -0.24367 | -0.26113 | -0.53693 | -0.35782 | -0.16462 | 0.05491  | 0.37477  | 0.06192  | -0.12557 | -0.3927  | -0.41107 | -0.36273 | -0.32586 | 0.13055  | 0.46585  | 0.59515  | 0.63328  | 1.34956  | 0.85018  | 0.9071   | 0.39518  | 0.3324   | 0.27574  |         |
| PF14 0665   | -0.35554 | 0.02416  | -0.14437 | -0.17692 | -0.24345 | -0.72156 | -0.09908 | 0.06728  | 0.20432  | 0.38587  | 0.52307  | 0.38028  | 0.46703  | 0.49695  | 0.23532  | 0.33433  | 0.06661  | 0.38068  | -0.00697 | -0.104   | -0.26746 | -0.36794 | -0.4363  | -0.27635 |         |
| PF0500c     | -1.30732 | -1.66541 | -1.51999 | -2.15097 | -2.21761 | -2.32935 | -2.14869 | -1.97247 | -1.01118 | -0.12166 | 0.00459  | 0.2286   | 0.44446  | 0.70566  | 0.50711  | 0.42951  | 0.68453  | 0.47642  | -0.44059 | -0.17218 | -0.34523 | -0.46518 | -0.72123 | -1.16721 |         |
| PFI0605c    | -0.68095 | -0.8161  | -0.70312 | -1.06366 | -0.9038  | -0.99632 | -1.0249  | -0.62664 | -0.23718 | -0.14258 | 0.28745  | 0.2978   | 0.59533  | 0.53151  | 0.62274  | 0.548    | 0.17268  | 0.21457  | 0.08129  | -0.21972 | -0.49422 | -0.5626  | -0.67974 | -0.62803 |         |
| PF14 0014   | -2.41147 | -2.54974 | -2.43244 | -2.92296 | -2.73452 | -2.35751 | -0.97631 | 0.00978  | 0.5041   | 0.67385  | 0.84069  | 1.00733  | 0.90223  | 0.66272  | 0.57481  | 0.2726   | -0.11205 | -0.14462 | -1.19181 | -1.4542  | -2.01638 | -2.18928 | -2.35833 | -2.46022 |         |
| PF13 0174   | -0.23031 | -0.29241 | 0.12784  | -0.09305 | 0.10107  | -0.00524 | -0.04371 | -0.16479 | -0.23168 | -0.1773  | 0.06679  | 0.0802   | 0.18166  | 0.01431  | 0.21615  | 0.15593  | 0.22238  | -0.09896 | 0.68099  | 0.21484  | 0.20645  | -0.25542 | -0.01469 | 0.30045  |         |
| PF08 0031   | -1.11176 | -0.99869 | -0.53362 | -0.71123 | -0.18737 | 0.47263  | 0.04474  | 0.34544  | 0.66091  | 0.80985  | 0.96943  | 1.02854  | 0.95451  | 0.55925  | 0.62712  | 0.43681  | -0.06677 | -0.19277 | 0.23066  | -0.20984 | -0.42008 | -0.87241 | -0.83363 | -0.83005 |         |
| PF01155w    | 1.42681  | 1.03639  | 0.39396  | 0.33674  | -0.01427 | -0.17661 | -0.39247 | -0.54565 | -0.5697  | -0.64299 | -0.68703 | -0.60004 | -0.58902 | -0.7992  | -1.01815 | -0.94367 | -0.08144 | -0.50632 | 0.53057  | 0.96819  | 1.21486  | 1.5658   | 1.46398  | 1.52504  |         |
| PFI0680c    | 0.00205  | 0.16829  | 0.32935  | 0.48831  | 0.59801  | 0.89549  | 0.94274  | 0.95561  | 0.95161  | 0.96747  | 0.83252  | 0.99567  | 0.55292  | 0.42281  | 0.01967  | -0.20969 | -0.48732 | -0.59691 | -0.20804 | -0.41427 | -0.31551 | -0.02386 | 0.16464  | 0.26343  |         |
| PF11290c    | 0.2824   | 0.4844   | -1.97936 | 1.37419  | 1.2205   | 1.06913  | 0.89749  | 0.93121  | 0.68684  | 0.6164   | 0.81191  | 0.69671  | 0.62988  | 0.22867  | 0.4165   | 0.22811  | -0.05569 | -0.01944 | -0.00114 | -0.50746 | -0.59575 | -0.49695 | -0.10982 | 0.09641  |         |
| PF14 0442   | -0.26655 | -0.18525 | 0.14896  | 0.20716  | 0.34622  | 0.34096  | 0.37034  | 0.30308  | 0.34413  | 0.48915  | 0.38289  | 0.352    | 0.47194  | 0.51919  | 0.25168  | -0.00602 | -0.09853 | -0.31646 | -0.81386 | -0.62881 | -0.51753 | -0.52898 | -0.3213  | -0.03576 |         |
| PFE1235c    | 0.41939  | -0.1341  | -0.02869 | 0.66972  | 0.75001  | 0.85081  | 0.75912  | 1.15079  | 0.91397  | 0.6476   | 0.40027  | 0.21493  | -0.02311 | -0.06677 | -0.42625 | -0.45434 | -0.44565 | -0.2896  | 1.36382  | 0.78494  | 0.64488  | 0.34267  | 0.96036  | 0.7579   |         |
| PF14 0126   | -0.64956 | -0.46792 | 0.12952  | 0.25441  | 0.23609  | 0.52236  | 0.56176  | 0.51264  | 0.86371  | 0.9168   | 0.91517  | 0.96312  | 0.78846  | 0.68389  | 0.2858   | -0.06075 | -0.08262 | -0.32795 | -0.79379 | -0.97891 | -1.03671 | -0.84423 | -0.88643 | -0.66385 |         |
| PF09293c    | -1.09338 | -1.03765 | -0.80064 | -0.61906 | -0.0985  | 0.75119  | 2.06664  | 2.68719  | 2.66832  | 1.95326  | 1.6114   | 1.0995   | -0.04819 | -0.62977 | -0.58617 | -0.85851 | -0.96113 | -0.88106 | -0.72181 | -1.05203 | -1.19459 | -0.9831  | -0.97353 | -0.58794 |         |
| PF0420c     | -1.39993 | -0.9675  | -0.68587 | -1.02734 | -0.83174 | -0.68265 | -0.61069 | -0.38456 | -0.35864 | -0.17516 | 0.15332  | 0.38165  | 0.57533  | 0.3723   | 0.79113  | 0.50726  | 0.15347  | 0.11652  | -0.20519 | -0.60485 | -0.9293  | -1.09172 | -1.16635 | -1.15408 |         |
| PFF1040w    | 0.0426   | 0.52659  | 0.74131  | 0.28876  | 0.63969  | 0.6382   | 0.48646  | 0.74535  | 0.72346  | 0.51362  | 0.60398  | 0.46301  | 0.30263  | -0.01419 | 0.1058   | 0.20407  | -0.03694 | -0.03166 | 0.25238  | -0.01755 | -0.13749 | -0.26609 | -0.06409 | 0.12123  |         |
| PFI0 0293   | 0.25005  | 0.2766   | 0.29914  | 0.20526  | 0.3808   | 0.19896  | 0.07144  | 0.28224  | 0.03383  | -0.12526 | 0.07423  | -0.03935 | -0.10396 | -0.28764 | -0.17867 | -0.09582 | 0.16922  | 0.0018   | 0.26653  | 0.36197  | 0.41208  | 0.42974  | 0.25223  | 0.35512  |         |
| MAL13P1.212 | 2.05894  | 1.1749   | 0.42443  | 0.81447  | 0.57536  | -0.01828 | -0.50798 | -0.75788 | -1.10391 | -1.27891 | -0.78871 | -0.52348 | -0.5766  | -0.79522 | -0.82324 | -0.95039 | -0.93517 | -0.88906 | 1.21368  | 1.14776  | 1.56693  | 1.54938  | 1.76127  | 1.94494  |         |
| PF0425w     | 0.91     | 0.79677  | 0.51451  | 1.32816  | 1.50166  | 1.58106  | 1.41746  | 1.45751  | 1.01508  | 0.57656  | 0.2204   | -0.35486 | -0.21259 | -0.39522 | -0.32257 | -0.32847 | -0.17528 | -0.36942 | -1.01038 | -0.50667 | -0.18747 | 0.0043   | -0.0033  | 0.38272  |         |
| PF11 0281   | 1.28678  | 1.53089  | 0.50646  | 1.45958  | 1.37576  | 1.36566  | 0.98143  | 1.07932  | 0.72652  | 0.55775  | 0.50212  | 0.41646  | 0.36687  | 0.35373  | 0.1703   | -0.078   | -0.43556 | -0.63958 | -0.23918 | -0.27009 | 0.22781  | 0.55943  | 0.51044  | 0.22919  |         |
| PF10 0320   | 0.98754  | 1.21191  | 1.4311   | 1.5929   | 1.39762  | 1.54971  | 1.55536  | 1.31012  | 1.42378  | 1.17893  | 0.9559   | 0.8948   | 0.58141  | 0.3914   | 0.00908  | -0.0278  | -0.2375  | -0.5384  | -0.75812 | -0.80839 | -0.86026 | -0.43107 | -0.0239  | 0.189    | 0.42488 |
| PFL1795c    | 0.40294  | 0.03851  | 0.16359  | 0.05067  | 0.19269  | 0.41691  | 0.69008  | 0.81466  | 1.15275  | 1.22576  | 0.95886  | 0.84754  | 0.69266  | 0.5389   | 0.01677  | -0.35965 | -0.52229 | -0.52251 | -0.46441 | -0.0333  | 0.04369  | 0.22818  | 0.28528  | 0.48959  |         |
| PF13 0356   | -0.13304 | 0.09116  | 0.12497  | 0.4109   | 0.21659  | 0.18267  | -0.00111 | 0.02655  | -0.11776 | -0.11366 | -0.27671 | -0.2744  | -0.20015 | 0.20673  | 0.20671  | 0.36387  | 0.32267  | 0.19585  | 0.29646  | 0.1729   | -0.23834 | -0.23502 | -0.36353 | -0.2699  |         |
| MAL13P1.106 | 0.77986  | 1.0632   | 0.74001  | 1.36344  | 1.39609  | 1.3762   | 1.05245  | 1.12859  | 0.69914  | 0.22209  | 0.341    | -0.06245 | -0.07587 | -0.10664 | -0.02699 | -0.05406 | -0.15776 | -0.11211 | 0.56111  | 0.26521  | 0.63338  | 0.60369  | 0.88068  | 0.9281   |         |
| PF0390w     | 0.25451  | 0.47516  | 0.39562  | 0.9597   | 1.19244  | 1.2066   | 1.09774  | 1.01502  | 0.7565   | 0.34795  | 0.30945  | 0.02156  | -0.00619 | -0.23974 | -0.00245 | 0.10238  | -0.09479 | 0.03617  | 0.14591  | 0.01037  | 0.04598  | 0.33941  | 0.41111  | 0.69872  |         |
| MAL7P1.209  | -0.57797 | -0.6437  | -0.11317 | -0.02574 | 0.1325   | 0.34904  | 0.64011  | 0.85159  | 0.97688  | 1.10583  | 1.05916  | 1.15804  | 0.83705  | 0.48278  | -0.02386 | -0.25192 | -0.5002  | -0.54178 | -0.46283 | -0.77172 | -0.46329 | -0.65688 | -0.33229 | -0.46815 |         |
| PF13 0241   | -1.11025 | -0.97917 | -0.80101 | -0.94746 | -0.86584 | -0.55613 | -0.34455 | -0.23994 | -0.09412 | 0.19756  | 0.36563  | 0.58417  | 0.43982  | 0.29441  | 0.35204  | 0.24539  | 0.1626   | 0.11431  | -0.18617 | -0.33441 | -0.54371 | -0.58682 | -0.75396 | -0.86428 |         |
| PFL1455w    | -0.90246 | -1.08346 | -0.72127 | -1.08347 | -1.18856 | -1.06043 | -0.86015 | -0.30089 | 0.75655  | 0.96975  | 1.04716  | 0.93684  | 1.00348  | 0.75159  | 0.47596  | 0.1884   | -0.30603 | -0.14867 | -0.60252 | -0.55204 | -0.62375 | -0.58873 | -0.635   | -0.63215 |         |
| PF0705w     | 0.69227  | 0.64081  | 0.62356  | 0.68156  | 0.7225   | 0.12446  | 0.33322  | 0.58984  | 0.39177  | 0.3133   | 0.49206  | 0.22599  | 0.01071  | -0.0895  | -0.3588  | -0.48152 | -0.46062 | -0.27747 | 0.28631  | 0.022    | 0.13199  | 0.06795  | 0.36353  | 0.46346  |         |
| PF13 0203   | 0.38994  | 0.56772  | 0.55336  | 0.3972   | 0.52836  | 0.66619  | 0.55324  | 0.51699  | 0.67044  | 0.46462  | 0.45987  | 0.19151  | 0.10443  | -0.31652 | -0.51043 | -0.7083  | -1.36524 | -0.93626 | -0.85262 | -0.37129 | -0.49344 | -0.15937 | 0.20274  | 0.28936  |         |
| PFI1185c    | -0.2483  | 0.02265  | 0.14314  | 0.29518  | 0.34947  | 0.54261  | 0.52446  | 0.71005  | 0.68702  | 0.70749  | 0.59412  | 0.6072   | 0.46011  | 0.51237  | 0.44977  | 0.26432  | 0.32445  | 0.17137  | 0.03033  | 0.02551  | -0.05558 | -0.14718 | -0.21016 | -0.16143 |         |
| PFL1420w    | -1.54746 | -0.8721  | -0.53828 | -0.71488 | -0.71535 | -0.70124 | -0.61101 | -0.45237 | -0.37527 | 0.09152  | 0.63166  | 0.72709  | 0.76176  | 0.62394  | 0.59376  | 0.19162  | 0.04442  | -0.72997 | -1.08398 | -1.78108 | -2.01449 | -1.96703 | -1.94827 | -1.68143 |         |
| PF14 0676   | -1.09979 | -0.82369 | -0.84066 | -0.67746 | -0.70519 | -0.65217 | -0.52214 | -0.39846 | -0.47821 | -0.184   | 0.22411  | 0.29547  | 0.39117  | 0.32123  | 0.71503  | 0.62278  | 0.02657  | 0.51463  | -0.01847 | -0.34076 | -0.71949 | -0.9837  | -1.05515 | -0.92539 |         |
| PFL1195w    | 0.84805  | 0.69911  | 0.00499  | 0.418    | 0.049    | 0.09254  | 0.00749  | 0.02773  | -0.16395 | -0.02065 | -0.0226  | 0.05404  | -0.02307 | 0.14817  | 0.49296  | 0.47418  | 0.33049  | 0.38278  | 0.79469  | 0.46165  | 0.45919  | 0.6706   | 0.50945  | 0.56422  |         |
| PF13 0238   | 0.62466  | 1.14585  | 0.61813  | 1.04621  | 0.8221   | 0.46504  | 0.01549  | 0.25711  | -0.4321  | -0.06651 | -0.54242 | -0.92673 | -1.03711 | -1.42706 | -1.19435 | -0.80073 | -0.35932 | -0.75705 | -0.02378 | 0.00756  | 0.18542  | 0.59655  | 0.6816   | 0.69357  |         |
| MAL8P1.105  | 0.04272  | 0.23635  | 0.48276  | 0.42351  | 0.31932  | 0.4183   | 0.37957  | 0.10043  | 0.24514  | 0.24778  | 0.26931  | 0.21759  | 0.42556  | 0.42056  | 0.38389  | 0.15135  | 0.01843  | -0.03546 | -0.31919 | -0.59989 | -0.61736 | -0.4323  | -0.47927 | -0.3991  |         |
| PFI0410c    | 0.77254  | 0.14621  | -0.90806 | -0.03156 | -0.35591 | -0.39721 | -0.67543 | -0.84014 | -1.06689 | -1.05287 | -0.96951 | -1.19381 | -1.1949  | -1.19526 | -0.83354 | -0.15962 | 0.71728  | 0.58463  | 1.44303  | 1.24102  | 1.3444   | 1.05142  | 1.05089  | 0.65536  |         |
| PFF1085c    | -0.34105 | -0.13662 | 0.49939  | 0.79706  | 1.21093  | 1.55895  | 1.4217   | 1.18914  | 1.02881  | 0.905    | 0.75904  | 0.7653   | 0.48633  | 0.31605  | 0.22573  | 0.1238   | 0.12796  | -0.11859 | 0.17646  | -0.06475 | -0.13772 | -0.22582 | -0.2334  | -0.14453 |         |
| PFF1375c    | 1.18952  | 0.32287  | -0.36749 | -0.16232 | -0.57928 | -1.25622 | -1.8997  | -1.97187 | -2.55595 | -2.19159 | -1.81984 | -1.56133 | -1.34281 | -1.31471 | -1.00829 | -0.97942 | -0.58203 | -0.42761 | 0.89781  | 1.47707  | 1.0732   | 0.73236  | 1.72421  | 1.8251   |         |
| PF13 0140   | -0.7932  | -0.8284  | -0.73391 | -0.5549  | -0.58048 | -0.55799 | -0.51146 | -0.5156  | -0.34616 | -0.16851 | 0.22901  | 0.45584  | 0.80659  | 0.65359  | 0.85806  | 0.68537  | 0.23401  | 0.38506  | 0.19017  | -0.23898 | -0.47952 | -0.98108 | -1.09991 | -1.07515 |         |
| PF14 0192   | -1.19884 | -1.23798 | -1.59991 | -1.48415 | -1.24094 | -0.73266 | -0.18814 | -0.14457 | 0.31509  | 0.68053  | 0.78614  | 0.91873  | 1.04959  | 1.03955  | 0.80463  | 0.62204  | 0.13752  | -0.10038 | 0.11363  | -0.28772 | -0.6388  |          |          |          |         |



|             |          |          |          |          |          |          |          |          |          |          |          |          |          |          |          |          |          |          |          |          |          |          |          |          |
|-------------|----------|----------|----------|----------|----------|----------|----------|----------|----------|----------|----------|----------|----------|----------|----------|----------|----------|----------|----------|----------|----------|----------|----------|----------|
| PF14_0531   | -0.32405 | -0.50364 | -0.42718 | -0.62007 | -0.50709 | -0.62823 | -0.69244 | -0.97084 | -0.91836 | -0.64904 | -0.39849 | -0.13221 | 0.19815  | 0.45071  | 0.51961  | 0.55791  | 0.60615  | 0.36739  | 0.43403  | 0.23726  | 0.22783  | -0.03677 | -0.07814 | 0.00214  |
| PFE0400w    | -0.12548 | -0.30405 | -0.6585  | -1.05134 | -1.41875 | -1.53984 | -1.82359 | -1.82921 | -2.32194 | -2.54471 | -2.69189 | -2.67913 | -2.13596 | 0.09342  | 0.87746  | 0.94334  | 1.29864  | 0.85539  | 0.91754  | 0.8007   | 0.4      | -0.14009 | -0.62679 |          |
| PF11_0392   | -0.31023 | -0.58777 | -0.8079  | -1.08014 | -1.22061 | -1.42493 | -1.48242 | -1.89529 | -2.19078 | -2.43373 | -2.68989 | -2.74973 | -2.26227 | -1.09993 | 0.02995  | 0.71422  | 1.2843   | 1.15392  | 0.46522  | 0.98502  | 1.07992  | 0.5633   | 0.13972  | -0.49499 |
| PF1575c     | -0.51413 | -0.74339 | -0.98531 | -1.12161 | -1.23449 | -1.19533 | -1.23034 | -0.47132 | -0.38096 | -0.02911 | 0.16437  | 0.46595  | 0.6544   | 0.53767  | 0.59245  | 0.69786  | 0.55455  | 0.47747  | 0.36907  | 0.17929  | -0.0338  | -0.10943 | -0.39064 | -0.6141  |
| PF13_0217   | -0.65169 | -0.48209 | -0.55964 | -0.4031  | -0.08865 | 0.17209  | 0.13301  | 0.35364  | 0.13685  | 0.10603  | 0.17747  | 0.22276  | 0.24767  | 0.29813  | 0.50785  | 0.52665  | 0.72932  | 0.23158  | 0.28998  | 0.23309  | -0.067   | -0.52962 | -0.38414 | -0.45783 |
| PFE0620w    | -0.29162 | -0.45468 | -0.40589 | -0.21969 | 0.06392  | -0.16288 | -0.18712 | 0.04494  | 0.20891  | 0.55712  | 0.69236  | 0.81867  | 0.54693  | 0.45798  | 0.23789  | 0.246    | -0.01564 | 0.41142  | -0.0918  | 0.19384  | -0.06202 | -0.28134 | -0.37541 | -0.34719 |
| PFB0680w    | -0.00233 | -0.3698  | -0.72042 | -1.15795 | -1.40245 | -1.64635 | -1.90119 | -2.46443 | -2.86504 | -2.64261 | -3.14328 | -3.04779 | -3.42444 | -2.79923 | -1.47843 | -0.21746 | -0.65382 | 1.00925  | -0.66877 | 1.16423  | 0.11011  | 0.848    | 0.54289  | -0.11524 |
| PF14_0161   | -0.26633 | -0.93377 | -0.79614 | -0.52321 | -0.37463 | 0.16361  | 0.2894   | 0.44076  | 0.52026  | 0.52582  | 0.62221  | 0.73315  | 0.69898  | 0.61817  | 0.44671  | 0.56688  | 0.37028  | 0.53858  | 0.46253  | 0.33039  | 0.00282  | -0.22502 | -0.15368 | -0.28397 |
| PFD0890w    | -0.60503 | -0.54091 | -0.24408 | -0.35007 | -0.07211 | 0.52391  | 0.92356  | 1.45838  | 1.10286  | 0.7218   | 0.82628  | 0.5127   | 0.56675  | 0.18724  | 0.33633  | 0.14268  | -0.40542 | -0.35362 | 0.23068  | -0.54959 | -0.55425 | -0.67553 | -0.5443  | -0.269   |
| MAL7P1.170  | 1.05684  | 1.56641  | 1.65106  | 1.63143  | 1.8909   | 1.38226  | 1.666    | 0.96049  | 0.75684  | 0.26016  | -0.14282 | -0.70656 | -1.68177 | -2.97735 | -3.3151  | -3.96821 | -3.48404 | -3.71932 | -2.37917 | -1.11199 | -0.10592 | 0.24532  | 0.59606  | 1.11879  |
| PFF0150c    | -0.10957 | 0.12861  | -0.05939 | 0.02053  | 0.06382  | 0.05747  | 0.03243  | 0.1954   | -0.01695 | -0.05105 | 0.2457   | 0.31829  | 0.40607  | 0.42136  | 0.54234  | 0.52437  | 0.12734  | 0.42269  | 0.40622  | 0.21139  | 0.01785  | -0.04317 | -0.07787 | 0.00977  |
| PF14_0430   | -0.43901 | -0.11579 | -0.44836 | -0.3045  | -0.5941  | -0.70479 | -0.54514 | -0.4036  | -0.06581 | 0.22873  | 0.68551  | 0.90065  | 0.92568  | 0.77879  | 0.72064  | 0.56299  | 0.1691   | 0.14652  | 0.03498  | -0.50582 | -0.38391 | -0.40266 | -0.46069 | -0.42141 |
| PFL1520w    | 0.60627  | 0.412    | 0.56629  | 0.34814  | 0.26113  | 0.36189  | 0.14148  | 0.3018   | 0.20345  | 0.22253  | 0.29691  | 0.2431   | -0.06741 | -0.14819 | -0.10934 | -0.20003 | -0.78531 | -0.22913 | 0.90889  | 0.28729  | 0.21128  | 0.2522   | 0.47434  | 1.01189  |
| PF14_0350   | -0.07316 | 0.13617  | 0.18103  | 0.48742  | 0.57886  | 0.52987  | 0.42367  | 0.10599  | 0.05712  | 0.03071  | 0.01396  | 0.02814  | 0.10987  | 0.051    | 0.04047  | 0.24364  | 0.19535  | 0.11677  | 0.08453  | -0.04494 | -0.00752 | -0.11095 | -0.20168 | -0.13369 |
| PFL2115c    | -0.3588  | -0.37796 | -1.02542 | -0.98138 | -1.0706  | -0.91176 | -0.8185  | -0.41515 | 0.13121  | 0.38931  | 0.43908  | 0.4725   | 0.6933   | 0.64957  | 0.5423   | 0.38194  | 0.14599  | 0.30697  | 0.26885  | 0.18477  | 0.06545  | 0.05111  | -0.18085 | -0.2598  |
| PF14_0207   | 0.14819  | 0.88379  | 0.67473  | 0.88011  | 0.97426  | 1.05575  | 0.94894  | 0.99443  | 1.02904  | 0.97685  | 1.08755  | 0.86092  | 0.63126  | 0.12054  | -0.09059 | -0.41344 | -0.65568 | -0.57776 | -0.8323  | -1.01066 | -0.81021 | -0.50025 | -0.3214  | 0.12726  |
| PFL0800c    | -0.32626 | -0.56757 | -0.55811 | -0.51025 | -0.40809 | -0.4322  | -0.41949 | 0.0427   | -0.40721 | -0.3657  | -0.06088 | -0.16668 | -0.087   | -0.39221 | 0.35244  | 0.52023  | 0.22909  | 0.35562  | 0.70396  | -0.5491  | -0.15064 | -0.06208 | -0.60538 | -0.3827  |
| PFL0315c    | 0.31971  | -0.19551 | -0.33528 | -0.86993 | -0.97291 | -1.21181 | -1.46055 | -1.54177 | -1.70639 | -1.72737 | -1.75218 | -1.71349 | -1.53433 | -1.37731 | -0.93752 | -0.02651 | 0.80253  | 0.91325  | 0.42889  | 1.0742   | 1.14104  | 0.97141  | 0.82211  | 0.16328  |
| PFB0445c    | -0.68202 | -0.2225  | -0.01681 | -0.02554 | 0.07769  | 0.09084  | -0.00134 | 0.17904  | 0.17471  | 0.24574  | 0.39015  | 0.43583  | 0.426    | 0.34315  | 0.19813  | -0.04595 | -0.26769 | -0.68216 | -1.12959 | -1.3564  | -1.27829 | -1.16572 | -1.08641 | -0.84202 |
| PF11_0473   | 1.11051  | 0.64258  | 0.32972  | 0.32134  | 0.22902  | 0.47117  | 0.43845  | 0.51617  | 0.3512   | 0.24527  | 0.0581   | -0.12345 | -0.27084 | -0.67136 | -0.56372 | -0.83238 | -0.87681 | -0.45769 | 1.21071  | 0.82385  | 0.99697  | 1.34674  | 1.39363  | 1.2942   |
| PF14_0588   | 0.62022  | 0.74258  | 0.88025  | 1.07439  | 1.21923  | 1.22613  | 0.94842  | 0.86171  | 0.43243  | 0.22428  | -0.05126 | -0.32044 | -0.35102 | -0.4485  | -0.59155 | -0.6035  | -0.31064 | 0.03716  | -0.34992 | 0.62837  | 0.92526  | 1.3523   | 1.51367  | 1.55835  |
| PF13_0264   | -0.1494  | -0.07626 | -0.24287 | 0.09709  | -0.10979 | 0.01735  | -0.32885 | 0.00531  | 0.15551  | 0.12425  | 0.26157  | 0.4513   | 0.30361  | 0.41555  | 0.44743  | 0.60993  | 0.51587  | 0.40723  | 0.59455  | 0.22376  | -0.12735 | 0.08127  | -0.14274 |          |
| PFB0715w    | 0.0266   | 0.183    | -0.12079 | 0.32688  | 0.34972  | 0.38309  | 0.40947  | 0.58445  | 0.54783  | 0.64638  | 0.681    | 0.66322  | 0.67497  | 0.40071  | 0.28477  | 0.07913  | -0.24182 | -0.47933 | -0.36887 | -0.70958 | -0.65828 | -0.357   | -0.29908 | -0.05508 |
| PFO7_0073   | -0.30536 | -0.20577 | 0.05174  | 0.29309  | 0.44501  | 0.59172  | 0.47706  | 0.37334  | 0.28584  | 0.26733  | 0.46229  | 0.46578  | 0.53007  | 0.42835  | 0.37906  | 0.34894  | 0.23179  | -0.08659 | 0.00073  | -0.33691 | -0.46523 | -0.54899 | -0.52108 | -0.44853 |
| PFL1840w    | 0.16309  | -0.08903 | -0.22146 | -0.13905 | -0.2194  | -0.42119 | -0.6229  | -0.78311 | -1.41396 | -1.77783 | -1.62713 | -2.09913 | -1.84251 | -1.58099 | -0.22477 | 0.60121  | 1.10333  | 0.63135  | 1.58439  | 1.09414  | 0.83838  | 0.36644  | 0.59548  | 0.39672  |
| PF14_0368   | -0.78223 | -0.19617 | 0.04234  | 0.06886  | 0.09573  | 0.18612  | 0.06326  | -0.07366 | -0.30522 | -0.02998 | 0.55169  | 0.64501  | 0.68562  | 0.50588  | 0.59668  | 0.18716  | -0.26332 | -0.76923 | -0.87275 | -1.41302 | -1.27558 | -0.86414 | -0.89896 | -0.78682 |
| PFD0945c    | 0.85278  | 0.63547  | -0.6951  | 1.17486  | 1.04658  | 0.86422  | 0.85864  | 0.55564  | 0.48269  | 0.26397  | 0.05277  | 0.2646   | -0.03206 | 0.12821  | 0.13587  | 0.22275  | 0.13535  | 0.29183  | 0.13497  | 0.46859  | 0.19053  | 0.22771  | 0.40314  | 0.2935   |
| PFB0932w    | 1.39136  | 1.47294  | 1.00021  | 1.46808  | 1.21484  | 1.39257  | 1.15412  | 1.31755  | 0.99562  | 0.61937  | 0.69931  | 0.45003  | -0.36881 | -0.72995 | -0.90688 | -1.39494 | -1.5712  | -1.75106 | -1.6208  | -0.76896 | -0.11077 | 0.12714  | 0.6991   | 0.94689  |
| MAL7P1.113  | 0.20868  | 0.56392  | 0.65072  | 0.95589  | 0.91509  | 1.05111  | 0.98816  | 1.0693   | 1.172    | 1.08883  | 0.8005   | 0.63784  | 0.40655  | 0.14634  | -0.11891 | -0.50489 | -0.58164 | -0.88697 | -0.10656 | -0.91207 | -0.58121 | -0.07712 | 0.06436  | 0.28457  |
| mal mito 1  | -0.29997 | -0.22895 | -0.83562 | -0.77422 | -0.84345 | -0.7289  | -1.16773 | -0.36414 | -0.69484 | -0.63799 | -0.15506 | -0.13197 | -0.06649 | 0.06058  | 0.21624  | 0.46594  | -0.28923 | 0.84879  | 0.45034  | 0.06919  | 0.01098  | 0.28878  | -0.05997 | -0.19391 |
| PF1365w     | -0.25404 | -0.23263 | -0.47163 | -0.50844 | -0.63828 | -0.70775 | -0.69264 | -0.77328 | -0.89296 | -0.60073 | -0.29797 | -0.20878 | -0.00424 | -0.06595 | 0.47392  | 0.60264  | 0.65211  | 0.44829  | 0.97286  | 0.55312  | 0.28924  | 0.0994   | 0.06468  | -0.18298 |
| PF14_0662   | -0.60023 | -0.62356 | -1.57408 | -0.20488 | 0.22447  | 0.65104  | 1.08585  | 1.65402  | 1.34668  | 1.14167  | 1.01989  | 0.53328  | 0.25497  | -0.0176  | -0.08839 | -0.18526 | -0.42623 | -0.15634 | -0.12698 | -0.2829  | -0.40127 | -0.17123 | -0.11919 | 0.0802   |
| PFD0275w    | -0.25598 | -0.38982 | -0.30038 | 0.13634  | 0.12931  | 0.2312   | 0.34     | 0.42372  | 0.48777  | 0.52695  | 0.633    | 0.46712  | 0.5601   | 0.42874  | 0.4268   | 0.23279  | 0.10145  | -0.23869 | -0.3575  | -0.57089 | -0.76247 | -0.67771 | -0.49461 | -0.31819 |
| PF08_0054   | -0.6246  | -0.37573 | -0.16913 | 0.13954  | -0.07893 | -0.05439 | -0.12371 | 0.7788   | 0.36344  | 0.40601  | 0.5775   | 0.53907  | 0.87641  | 0.82503  | -0.08253 | -0.38159 | -0.57428 | -0.76215 | -0.75626 | -0.62758 | -1.11788 | -1.00609 | -0.51476 | -0.30281 |
| PFE0770w    | 0.47842  | 0.09487  | 0.02478  | -0.25213 | -0.33363 | -0.58977 | -0.66108 | -0.63902 | -1.11506 | -1.28259 | -1.28834 | -1.46371 | -1.6187  | -1.73301 | -1.37944 | -0.86418 | -0.28823 | 0.02921  | 0.53663  | 0.51152  | 0.6697   | 0.48841  | 0.55412  | 0.54834  |
| PFE0320w    | 0.59689  | 0.36395  | 0.08524  | 0.17107  | 0.2992   | 0.20213  | 0.10888  | -0.15606 | 0.02726  | -0.11393 | -0.39921 | -0.35153 | -0.31407 | -0.12776 | -0.38434 | -0.36689 | 0.00051  | 0.19778  | 0.03941  | 0.69863  | 0.85859  | 0.58953  | 0.69688  | 0.66882  |
| MAL13P1.320 | -0.04766 | -0.00518 | 0.41277  | 0.13009  | 0.18156  | 0.33344  | 0.15526  | -0.1402  | -0.05416 | 0.53948  | 0.57134  | 0.63578  | 0.58647  | 0.55141  | 0.69264  | 0.54971  | 0.3095   | 0.49563  | 0.41352  | 0.20864  | 0.2165   | 0.26865  | 0.31825  | 0.56509  |
| PF08_0083   | 1.56246  | 1.35118  | 0.91381  | 1.4188   | 1.23347  | 1.00711  | 0.69741  | 0.67492  | 0.07304  | -0.48323 | -0.60282 | -0.72032 | -1.05195 | -1.0198  | -1.23284 | -1.22603 | -1.277   | -1.11076 | -0.09694 | 0.64634  | 1.06482  | 0.9566   | 1.47439  | 1.57025  |
| PFA0355w    | -0.49362 | -0.58375 | -0.6683  | -0.43344 | -0.53099 | -0.41804 | -0.28367 | 0.04049  | 0.66038  | 0.83803  | 0.96065  | 0.9458   | 1.0613   | 0.83046  | 0.6381   | 0.49165  | 0.16766  | 0.17542  | -0.13211 | -0.33152 | -0.40981 | -0.33872 | -0.32713 | -0.11338 |
| MAL8P1.54   | 0.14275  | 0.20445  | 0.38457  | 0.37531  | 0.24739  | 0.09231  | -0.20054 | -0.52802 | -0.66114 | -0.66603 | -0.74602 | -0.78233 | -0.53337 | 0.02935  | 0.30288  | 0.47596  | 0.53454  | 0.51274  | 0.06293  | 0.35793  | 0.30777  | 0.11479  | -0.04887 | -0.02807 |
| PF1510w     | 0.48946  | 0.97099  | 0.76271  | 0.89627  | 0.91785  | 0.52334  | 0.49671  | 0.76453  | 0.4225   | 0.23781  | -0.05204 | -0.35857 | -0.47786 | -0.73149 | -1.00038 | -1.24928 | -1.15451 | -1.4433  | -1.31322 | -0.68678 | -0.20528 | -0.00849 | 0.20545  | 0.       |

|                   |          |          |          |          |          |          |          |          |          |          |          |          |          |          |          |          |          |          |          |          |          |          |          |          |
|-------------------|----------|----------|----------|----------|----------|----------|----------|----------|----------|----------|----------|----------|----------|----------|----------|----------|----------|----------|----------|----------|----------|----------|----------|----------|
| PFB0450w          | -0.72762 | -0.3968  | 0.17249  | -0.08653 | 0.11525  | 0.30792  | 0.39133  | 0.35466  | 0.19343  | 0.17982  | 0.13732  | 0.19238  | 0.09158  | 0.1719   | 0.47186  | 0.41355  | 0.16215  | 0.17975  | -0.14415 | -0.13319 | -0.55801 | -0.84281 | -0.90283 | -0.77801 |
| MAL8P1.75a        | -0.60381 | -0.37493 | -0.17012 | -0.36161 | -0.36601 | -0.16913 | 0.39811  | 0.105179 | 1.43986  | 1.50485  | 1.31029  | 1.2735   | 1.0333   | 0.82836  | 0.4693   | 0.07302  | -0.33671 | -0.03601 | -0.47758 | -0.38412 | -0.40203 | -0.31522 | -0.33579 | -0.24396 |
| PFL0950c          | -0.21111 | -0.00583 | 0.29286  | 0.55579  | 0.51576  | 0.57681  | 0.52448  | 0.69008  | 0.50655  | 0.42864  | 0.20051  | -0.00772 | 0.11195  | 0.09019  | 0.06394  | 0.10291  | 0.2199   | 0.03005  | 0.49467  | 0.05976  | -0.06743 | 0.11419  | -0.00562 | -0.01246 |
| PF14 0551         | 0.44218  | 0.48353  | 0.05664  | -0.01672 | 0.05735  | -0.29697 | -0.29681 | -0.23671 | -0.2469  | -0.0902  | 0.14017  | 0.22796  | 0.06179  | 0.10201  | 0.08894  | 0.23266  | 0.04254  | 1.05309  | 0.84617  | 0.99723  | 0.72589  | 0.34652  | 0.28009  | 0.03602  |
| PF14 0718         | 0.11088  | -0.1381  | 0.53283  | 1.01335  | 1.24555  | 1.42166  | 1.37674  | 1.44218  | 0.82575  | 0.79567  | 0.63036  | 0.42588  | 0.27209  | 0.15196  | 0.15294  | -0.08403 | -0.33104 | -0.10256 | -0.24423 | -0.3705  | -0.91972 | -0.78127 | -0.79118 | -0.62317 |
| PF13 0326         | 0.09477  | -0.18174 | -0.32867 | -0.53826 | -1.03029 | -1.33264 | -1.51332 | -1.61589 | -1.98386 | -1.7359  | -1.82616 | -1.75068 | -1.65411 | -1.88428 | -1.56327 | -0.83234 | 0.24429  | 0.30771  | 1.29608  | 1.05623  | 0.94096  | 0.98205  | 0.82529  | 0.73984  |
| PF1280c           | 0.30968  | 0.2976   | 0.55124  | 0.62528  | 0.731    | 0.77587  | 0.66964  | 0.22482  | 0.17686  | 0.1025   | -0.04663 | -0.1661  | -0.12679 | 0.18108  | 0.11461  | 0.07162  | 0.15031  | 0.06929  | -0.43779 | -0.23627 | -0.12835 | 0.00969  | 0.04267  | 0.09918  |
| PF14 0331         | -0.41353 | -0.53341 | -0.68897 | -0.91471 | -1.27175 | -1.19464 | -1.20978 | -1.16909 | -0.36267 | -0.04311 | 0.35571  | 0.54691  | 0.75304  | 0.5867   | 0.73413  | 0.67298  | 0.56313  | 0.39238  | 0.57009  | 0.07622  | -0.07604 | -0.1795  | -0.39079 | -0.68222 |
| PF07 0012         | -0.98199 | -1.12017 | -1.81896 | -1.04664 | -1.1497  | -0.90504 | -0.76736 | -0.84398 | -0.67078 | -0.39798 | -0.17915 | 0.18821  | 0.50906  | 0.76217  | 0.89665  | 0.81055  | 0.74264  | 0.49627  | 0.13328  | 0.19066  | -0.13464 | -0.32959 | -0.50237 | -0.89543 |
| MAL13P1.73        | -0.41204 | -0.47873 | 0.0187   | 0.46372  | 0.54349  | 0.81002  | 0.90293  | 1.08892  | 1.13811  | 1.09438  | 1.09359  | 0.98901  | 0.67228  | 0.44235  | 0.06111  | -0.27138 | -0.37735 | -0.35087 | -0.66401 | -0.84675 | -0.8158  | -0.70444 | -0.4766  |          |
| PF11 0347         | 0.61989  | 1.70957  | 1.93688  | 2.19625  | 2.19426  | 1.81079  | 1.33299  | 0.75245  | 0.1463   | -0.48762 | -1.23376 | -1.60401 | -1.78306 | -1.84406 | -2.25611 | -2.31989 | -1.79179 | -1.77614 | -2.21587 | -1.43531 | -0.89183 | -0.10787 | 0.1774   | 0.59356  |
| MAL7P1.64         | 0.39027  | 0.38418  | 0.22688  | 0.01678  | 0.07336  | -0.05035 | -0.01187 | -0.07059 | -0.18485 | -0.30944 | -0.34451 | -0.40885 | -0.52198 | -0.57522 | -0.21355 | -0.15959 | -0.33587 | -0.48914 | 0.04139  | 0.08235  | -0.16164 | 0.14918  | 0.29557  | 0.33841  |
| PFF1335c          | -1.32551 | -0.43677 | 0.0094   | 0.20974  | 0.27472  | 0.56     | 0.32237  | 0.33801  | -0.19739 | 0.20743  | 0.68155  | 0.62438  | 0.6913   | 0.34674  | 0.38178  | -0.03508 | -0.61416 | -1.08001 | -1.22272 | -2.14731 | -2.14683 | -1.72207 | -1.66127 | -1.30809 |
| PF10_API0049t:RNA | -0.0551  | 0.70518  | 0.27924  | -0.37615 | -0.09832 | 0.49757  | -0.25351 | 0.54717  | 0.32655  | -0.10414 | -0.05184 | 0.01523  | -0.29649 | -0.34117 | -0.18977 | 0.00982  | -0.44852 | 0.51248  | 0.73421  | 0.25378  | 0.6019   | 1.08189  | 0.47632  | 0.50984  |
| MAL7P1.108        | 0.33579  | 0.48601  | 0.65225  | 0.64423  | 0.52358  | 0.37535  | 0.13112  | -0.2992  | -0.72045 | -1.01752 | -1.2133  | -1.29963 | -1.08722 | -0.86858 | -0.71613 | -0.42917 | 0.23783  | 0.1219   | 0.26683  | 0.44438  | 0.53433  | 0.611    | 0.50813  | 0.27362  |
| PF10 0140         | -0.10757 | -0.45734 | -0.3612  | -0.528   | -0.4801  | -0.69949 | -0.91115 | -1.03181 | -0.84136 | -0.29968 | -0.07787 | 0.13469  | 0.38124  | 0.47389  | 0.521    | 0.34221  | 0.5289   | -0.09388 | 0.27866  | 0.30308  | 0.30907  | 0.14837  | 0.11106  |          |
| PFL1645w          | -0.11031 | 0.06468  | 0.27927  | 0.0655   | 0.09485  | 0.09297  | 0.19888  | 0.13689  | 0.38013  | 0.40371  | 0.13917  | 0.19344  | 0.34938  | 0.56995  | 0.29965  | 0.11529  | 0.23833  | 0.10133  | -0.63884 | -0.22217 | -0.25031 | -0.06504 | -0.20207 | -0.26273 |
| PF14 0724         | 1.16127  | 1.29459  | 0.80295  | 1.32987  | 1.4313   | 1.30168  | 1.20988  | 1.41882  | 1.02899  | 0.67945  | 0.43724  | 0.33735  | -0.00177 | -0.02676 | -0.05948 | -0.25272 | -0.52113 | -0.49851 | -0.00619 | -0.06712 | 0.0761   | 0.35932  | 0.7388   | 1.00993  |
| PF10 0040         | 0.39124  | 0.49415  | 0.39261  | 0.7416   | 0.61419  | 0.69536  | 0.80933  | 0.80029  | 0.65693  | 0.31348  | 0.38352  | 0.20179  | 0.37987  | 0.36551  | 0.30688  | 0.25419  | 0.2582   | 0.34986  | 0.21979  | 0.40846  | 0.69381  | 0.61344  | 0.70443  | 0.76047  |
| PFL0415w          | -1.45444 | -1.38598 | -1.64619 | -1.30809 | -1.34635 | -1.01311 | -0.70564 | -0.15736 | 0.45932  | 0.69644  | 0.95758  | 1.00045  | 1.13213  | 0.69193  | 0.68865  | 0.37207  | -0.03641 | -0.11656 | -0.05755 | -0.53043 | -0.85323 | -0.81616 | -0.87772 | -0.8626  |
| PF0445w           | 0.81383  | 0.19863  | -0.14265 | 1.08134  | 1.36321  | 1.52575  | 1.31185  | 1.36633  | 1.2622   | 0.70978  | 0.70378  | 0.62995  | 0.48693  | 0.37379  | 0.08208  | 0.23867  | -0.1144  | -0.14744 | 0.89691  | 0.55892  | 0.22502  | 0.47618  | 0.7361   | 0.89339  |
| PFL2465c          | -0.3839  | -0.5496  | -0.55686 | -0.62681 | -0.71629 | -0.85865 | -0.83724 | -0.7475  | -0.63032 | -0.46218 | 0.17043  | 0.21536  | 0.45582  | 0.08667  | 0.49403  | 0.62551  | 0.23226  | 0.45269  | 0.83302  | 0.13564  | 0.04485  | -0.14812 | -0.03955 | -0.09849 |
| PF14 0326         | 0.42125  | 0.41306  | 0.78166  | 0.44269  | 0.31283  | 0.54087  | 0.70882  | 0.38045  | 1.02863  | 0.91934  | 0.63493  | 0.59329  | 0.47598  | 0.30061  | -0.31884 | -0.85963 | -0.74344 | -0.97743 | -1.2981  | -0.62884 | -0.35438 | -0.01166 | 0.05513  | 0.26575  |
| MAL8P1.206        | -3.51153 | -3.50828 | -3.49047 | -3.97461 | -3.15574 | -2.8567  | -0.18897 | 1.10786  | 1.92766  | 2.28077  | 1.62962  | 1.4752   | 1.10154  | 0.26257  | -0.72432 | -1.805   | -2.36619 | -2.91849 | -3.46918 | -3.58108 | -3.73497 | -3.66058 | -4.09678 | -4.01491 |
| PF11 0303         | -0.58729 | -0.56409 | -0.62319 | -0.4872  | -0.42064 | -0.43137 | -0.45157 | -0.3678  | -0.39208 | -0.27796 | 0.04608  | 0.1437   | 0.29499  | 0.2554   | 0.58969  | 0.50966  | 0.24343  | 0.21296  | 0.26098  | -0.11394 | -0.095   | -0.45576 | -0.52046 | -0.47405 |
| PFL1345c          | 0.82389  | 0.93212  | 0.87076  | 1.17994  | 1.21629  | 1.14596  | 1.19089  | 1.28397  | 1.22545  | 1.20484  | 0.96214  | 0.77059  | 0.27238  | -0.03375 | -0.51093 | -0.84603 | -1.17018 | -1.32982 | -0.7621  | -0.65281 | -0.07077 | 0.19038  | 0.44658  | 0.74681  |
| PF11 0077         | -0.48843 | -0.8461  | -0.61174 | -1.40707 | -1.036   | -1.7622  | -1.99187 | -1.69965 | -1.96446 | -1.62903 | -1.52173 | -2.31869 | -2.2078  | -1.05459 | -0.67611 | -0.31309 | 0.40756  | -0.13001 | -0.03913 | -0.21654 | 0.1379   | 0.1829   | -0.53192 | -0.4621  |
| MAL8P1.122        | 0.52066  | -0.14685 | -0.30087 | -0.65175 | -1.08568 | -1.16489 | -1.37294 | -1.63479 | -1.93817 | -2.19709 | -1.9575  | -1.76791 | -1.70882 | -1.49078 | -0.92748 | -0.85272 | -0.50231 | -0.18728 | 0.58423  | 0.83351  | 0.92663  | 0.86547  | 1.03214  | 1.00152  |
| PF10 0259         | -0.09363 | -0.00671 | -0.23386 | 0.16189  | 0.27072  | 0.29567  | 0.45378  | 0.7347   | 0.65596  | 0.90358  | 0.9409   | 0.86874  | 0.70384  | 0.39931  | 0.25904  | 0.20113  | -0.02273 | -0.1104  | 0.13014  | 0.02653  | -0.07382 | -0.15863 | -0.1184  | -0.042   |
| PFL1895w          | -0.52059 | -1.27954 | -2.44448 | -0.60556 | -0.6859  | -1.15735 | -0.82684 | -0.5323  | -0.30688 | 0.05142  | 0.48364  | 0.61926  | 0.76313  | 0.50314  | 0.6998   | 0.62244  | 0.37407  | 0.1204   | 0.48843  | -0.027   | -0.01693 | -0.44406 | -0.0962  | -0.20286 |
| PFA0155c          | -0.29788 | -0.33245 | -0.51753 | -0.63357 | -0.67121 | -0.72782 | -0.82114 | -0.98883 | -0.86336 | -0.70055 | -0.61266 | -0.50936 | -0.36205 | -0.09347 | 0.15506  | 0.45753  | 0.85149  | 0.66847  | 0.41353  | 0.67423  | 0.53648  | 0.50134  | 0.19349  | -0.14234 |
| PF13 0076         | 0.52926  | 0.83028  | 1.03719  | 1.18012  | 1.37279  | 1.3495   | 1.11485  | 0.95515  | 0.80187  | 0.51822  | 0.32757  | 0.0807   | -0.41144 | -1.09756 | -1.4764  | -2.03134 | -2.39777 | -2.47978 | -2.20465 | -1.94642 | -1.16919 | -0.35756 | -0.10315 | 0.22109  |
| PFA0590w          | -1.93896 | -2.28781 | -1.98724 | -2.15888 | -2.09632 | -1.50558 | -0.52567 | 0.24334  | 0.83545  | 1.14736  | 1.14009  | 1.26951  | 1.19307  | 1.05666  | 0.50693  | 0.19469  | -0.0365  | -0.37379 | -0.91919 | -1.2284  | -1.84635 | -2.04794 | -2.42319 | -2.57041 |
| MAL7P1.175        | -0.6849  | -1.11169 | -0.94682 | -1.25555 | -1.05961 | -0.29217 | 0.71589  | 1.25825  | 1.26852  | 1.28687  | 1.29891  | 1.15861  | 0.93834  | 0.66475  | 0.36497  | -0.13681 | -0.28384 | -0.29199 | -0.61746 | -0.9249  | -1.15846 | -1.22491 | -1.27702 | -1.0781  |
| PFL0520c          | 1.28332  | 1.40733  | 1.75169  | 1.21328  | 1.14331  | 1.01547  | 0.7878   | 0.80596  | 0.58544  | 0.45038  | 0.32609  | 0.11028  | 0.15186  | 0.10098  | 0.07805  | -0.06067 | -0.32745 | -0.29038 | -0.14967 | 0.15856  | 0.54568  | 0.48099  | 0.75572  | 1.13546  |
| PFI1680w          | -0.49999 | -0.60383 | -0.24972 | -0.36596 | -0.25393 | -0.09941 | 0.08288  | 0.00605  | 0.0886   | 0.08654  | 0.15423  | 0.11962  | 0.17577  | 0.2004   | -0.00789 | 0.2393   | 0.25453  | 0.15591  | 0.23728  | 0.15216  | 0.11544  | 0.03337  | 0.10192  | 0.12559  |
| PF11 0251         | -0.31103 | -0.16487 | 0.26073  | 0.16825  | 0.08142  | 0.02707  | -0.0735  | -0.41632 | -0.56262 | -0.73645 | -0.56112 | -0.54688 | -0.22702 | 0.01445  | 0.52557  | 0.51046  | 0.63978  | 0.33446  | 0.40243  | 0.14996  | -0.1413  | -0.05332 | -0.04438 | -0.15527 |
| PF10 0106         | -0.14645 | 0.02599  | 0.45656  | 0.21532  | 0.33666  | 0.46015  | 0.40366  | 0.50999  | 0.70768  | 0.64483  | 0.64985  | 0.40283  | 0.33663  | 0.04423  | 0.09928  | -0.19909 | -0.27678 | -0.37958 | -0.42763 | -0.57472 | -0.2838  | -0.39321 | -0.07746 | 0.21293  |
| PF14 0271         | 0.81926  | 1.22269  | 0.88132  | 0.91626  | 1.0425   | 1.17723  | 0.97606  | 0.81274  | 0.5601   | 0.45126  | 0.34419  | 0.27416  | 0.18953  | 0.3013   | 0.06704  | 0.06357  | 0.10702  | 0.30325  | 0.02577  | 0.3004   | 0.51504  | 0.67236  | 0.7072   | 0.80706  |
| PFE1310c          | 0.52969  | 0.84466  | 0.81665  | 1.09032  | 1.10117  | 0.93638  | 0.80423  | 1.00311  | 0.81785  | 0.678    | 0.58177  | 0.42965  | -0.10611 | -0.48392 | -0.25705 | -0.50434 | -0.45985 | -0.6673  | -0.51625 | -0.52117 | -0.49549 | -0.22486 | 0.09185  | 0.41187  |
| PFF1395c          | -0.91127 | -1.2302  | -0.84676 | -1.36506 | -1.27219 | -1.02733 | -0.22111 | 0.05548  | 0.75164  | 0.91039  | 0.90131  | 1.02176  | 0.93753  | 0.83284  | 0.51197  | 0.32956  | 0.16075  | 0.01706  | -0.33032 | -0.43358 | -0.75559 | -0.7     |          |          |

|             |          |          |          |          |          |          |          |          |          |          |          |          |          |          |          |          |          |          |          |          |          |          |          |          |
|-------------|----------|----------|----------|----------|----------|----------|----------|----------|----------|----------|----------|----------|----------|----------|----------|----------|----------|----------|----------|----------|----------|----------|----------|----------|
| PFD0462w    | -0.20205 | -0.07218 | 0.30655  | 0.10537  | 0.35943  | 0.48455  | 0.60961  | 0.88819  | 1.07983  | 1.1713   | 1.12336  | 1.05882  | 0.68246  | 0.20325  | -0.23966 | -0.4269  | -0.75723 | -0.81769 | -0.60078 | -0.6526  | -0.4851  | -0.31851 | -0.14263 | 0.02129  |
| PFL2340w    | 0.41555  | 0.55242  | 0.14422  | 0.58668  | 0.90407  | 0.65226  | 0.55313  | 0.7357   | 0.6428   | 0.51628  | 0.54449  | 0.27425  | 0.29241  | 0.10222  | 0.10043  | 0.05304  | -0.12472 | 0.12411  | 0.06237  | 0.06489  | -0.01146 | 0.01948  | -0.01528 | 0.22614  |
| PF13 0273   | 0.16342  | 0.38251  | 0.64651  | 0.61379  | 0.68587  | 0.84964  | 0.77168  | 0.59559  | 0.72507  | 0.68094  | 0.63447  | 0.62819  | 0.62933  | 0.61177  | 0.34341  | -0.05016 | -0.15706 | -0.30224 | -0.76274 | -0.79024 | -0.72354 | -0.48233 | -0.40367 | -0.14745 |
| PFC0615w    | -0.27431 | -0.56253 | -0.1587  | -1.15048 | -1.33205 | -1.48143 | -1.67929 | -1.83862 | -1.45215 | -2.50705 | -1.79018 | -1.83719 | -1.25292 | -0.56625 | 0.30846  | 0.82105  | 1.09454  | 0.97218  | 0.844    | 1.06422  | 0.93278  | 0.42787  | -0.00743 | -0.78623 |
| PFL0465c    | 0.22358  | -0.19652 | -0.66768 | -0.65595 | -0.90217 | -0.9819  | -0.90899 | -0.70091 | -0.72081 | -0.68597 | -0.75115 | -0.72617 | -0.58166 | -0.24923 | -0.22637 | 0.19845  | 0.36815  | 0.54378  | 0.58178  | 0.73677  | 0.87409  | 0.58528  | 0.50671  | 0.18284  |
| PF11 0197   | -0.77578 | -0.77589 | -1.09164 | -0.85043 | -0.70425 | -0.58063 | -0.49176 | -0.26233 | -0.15927 | 0.03636  | 0.24922  | 0.30296  | 0.62496  | 0.44337  | 0.63251  | 0.44024  | 0.41755  | 0.05976  | 0.25456  | -0.08315 | -0.40493 | -0.47044 | -0.59423 | -0.78893 |
| PF1385c     | -0.23739 | 0.14988  | 0.47362  | 0.50582  | 0.59594  | 0.6035   | 0.54835  | 0.88447  | 0.52747  | 0.50399  | 0.61546  | 0.68956  | 0.64235  | 0.46705  | 0.20603  | -0.00545 | -0.10186 | -0.29762 | -0.47329 | -0.68595 | -0.71904 | -0.67967 | -0.95511 | -0.28312 |
| MAL13P1.255 | -0.94982 | -0.89445 | -0.53253 | -0.91313 | -1.03644 | -0.74498 | -0.17539 | 0.49049  | 0.79027  | 0.84648  | 0.86845  | 0.99461  | 0.83946  | 0.7846   | 0.54732  | 0.39935  | 0.16972  | 0.08276  | -0.12576 | -0.46141 | -0.7296  | -0.70909 | -0.80226 | -0.8441  |
| PFD0445c    | -0.38707 | -1.00457 | -0.85891 | -0.82694 | -0.77828 | -0.8986  | -0.90722 | -1.01478 | -1.04395 | -0.87171 | -0.70337 | -0.21354 | 0.10023  | 0.58078  | 0.63647  | 0.69186  | 0.98378  | 0.73433  | 0.1297   | 0.64142  | 0.12001  | -0.102   | -0.30516 | -0.16328 |
| PF07 0029   | -0.72733 | -0.59297 | -0.526   | -0.39619 | -0.45933 | -0.58391 | -0.52295 | -0.38302 | 0.65305  | 1.05108  | 0.85152  | 1.10543  | 0.76565  | 1.04644  | 0.23258  | -0.43226 | -0.67023 | -0.97534 | -1.60567 | -1.67216 | -1.32694 | -1.1796  | -0.94688 | -0.42548 |
| PFL1280w    | -0.25309 | -0.38501 | -1.75211 | -0.8306  | -0.9654  | -1.21771 | -1.26358 | -0.82193 | -0.72241 | -0.60661 | -0.22401 | -0.21793 | 0.20557  | 0.07561  | 0.48692  | 0.55032  | 0.30767  | 0.30466  | 0.86789  | 0.45676  | 0.05458  | -0.08576 | -0.00075 | -0.18783 |
| PF11 0238   | 0.07782  | -0.40195 | -0.74337 | -1.14008 | -1.09678 | -1.33882 | -1.34798 | -1.35366 | -1.58196 | -1.49824 | -1.49015 | -1.17328 | -0.67182 | -0.08064 | 0.49593  | 0.85667  | 1.08398  | 0.85101  | 1.16338  | 1.04752  | 0.80877  | -0.11853 | -0.34213 | -0.59797 |
| PFA0675w    | 0.96814  | 1.34454  | 0.91452  | 1.39388  | 1.5141   | 1.43061  | 1.36734  | 1.27766  | 1.18803  | 0.76073  | 0.3414   | 0.07977  | -0.00869 | 0.11327  | -0.2394  | -0.28686 | -0.06976 | 0.15704  | -0.39888 | 0.55204  | 0.79685  | 1.18623  | 1.23777  | 1.35637  |
| PF13 0159   | -0.49759 | -0.01791 | -0.33492 | -0.18987 | 0.1      | -0.03377 | 0.15222  | 0.40537  | 0.42899  | 0.39361  | 0.42101  | 0.33525  | -0.14548 | -0.23528 | -0.3978  | -0.61264 | -0.50508 | -0.66697 | 1.0764   | 0.56104  | 0.94636  | 0.41744  | 0.85346  | 1.39398  |
| PF14 0062   | -0.3537  | -0.37821 | -0.33251 | -0.35546 | -0.55902 | -0.63208 | -0.57495 | -0.23886 | 0.72341  | 0.89372  | 0.9908   | 1.14642  | 1.04294  | 0.721    | 0.48544  | 0.24761  | 0.10951  | 0.16465  | -0.0989  | -0.123   | 0.0194   | -0.10118 | -0.17133 | -0.21956 |
| PF11 0069   | -1.0271  | -1.01391 | -0.75836 | -0.8008  | -0.8267  | -0.57156 | -0.24894 | 0.13513  | 0.35346  | 0.38215  | 0.44146  | 0.52263  | 0.38719  | 0.02034  | -0.00595 | -0.03937 | -0.36877 | -0.4     | 0.05992  | -0.39241 | -0.58045 | -0.58463 | -0.38691 | -0.47812 |
| MAL7 ITS1   | -1.00077 | -1.06032 | -0.77561 | -0.10012 | 0.57884  | 0.78665  | 0.74198  | 1.6785   | 1.72835  | 0.63968  | 1.31999  | 1.99365  | 0.01315  | 0.02517  | -0.30221 | -0.00543 | -1.42634 | -0.42909 | 0.83154  | 0.14341  | -0.34454 | -0.28967 | -0.04909 | 0.18376  |
| PFE1400c    | 0.29538  | 0.11122  | 0.01983  | 0.49693  | 0.25665  | 0.34826  | -0.01503 | 0.03943  | 0.23484  | 0.07589  | 0.22442  | 0.3013   | 0.26437  | 0.08715  | 0.00922  | -0.02226 | -0.09405 | -0.2935  | 0.22595  | -0.04203 | -0.04786 | 0.12277  | 0.09998  | 0.22747  |
| PFD0550c    | 0.63087  | 0.23285  | -0.21589 | -0.19397 | -0.09491 | -0.27963 | 0.00501  | 0.12876  | 0.24753  | 0.18654  | 0.35732  | 0.21159  | -0.0714  | -0.08833 | -0.06603 | -0.16399 | -0.13676 | 0.03985  | 1.10963  | 0.94695  | 1.24808  | 0.68513  | 0.87122  | 1.14648  |
| PF13 0130   | -0.73234 | -0.14222 | 0.20808  | 0.19899  | 0.42242  | 0.68603  | 0.6483   | 0.41561  | 0.38269  | 0.1579   | 0.34556  | 0.27443  | 0.1417   | -0.05453 | 0.3117   | 0.25455  | -0.1454  | -0.3608  | 0.08622  | -0.47866 | -0.72759 | -0.6885  | -0.67505 | -0.6119  |
| PF10 0348   | 0.57511  | 0.01431  | -0.35699 | -1.12878 | -1.41528 | -1.8544  | -2.23244 | -2.52463 | -3.18409 | -3.57438 | -3.83857 | -4.1548  | -3.80209 | -3.01988 | -1.92597 | -0.90309 | -0.48456 | 0.7475   | 1.43305  | 1.35074  | 1.22523  | 1.22183  | 1.12571  | 0.50421  |
| PF1690c     | 1.48217  | 1.57067  | 1.71809  | 1.68609  | 1.55706  | 1.22448  | 1.07567  | 1.17222  | 0.64506  | 0.14645  | 0.08443  | 0.18046  | 0.08403  | 0.15669  | 0.13003  | 0.05697  | 0.10238  | 0.20055  | 0.20375  | 0.5721   | 0.59194  | 0.41132  | 0.59086  | 0.62235  |
| PFF1165c    | -0.28673 | -0.11775 | -0.44967 | -0.11668 | -0.18647 | 0.02825  | 0.23509  | 0.432    | 0.52942  | 0.47619  | 0.44362  | 0.2912   | 0.58723  | 0.4992   | 0.5463   | 0.4537   | 0.30588  | 0.46995  | 0.48206  | 0.27802  | 0.07775  | -0.19785 | 0.00639  | -0.04291 |
| PF13 0360   | 0.32335  | 0.51858  | 0.76525  | 0.79547  | 0.7491   | 0.71111  | 0.62055  | 0.52166  | 0.43642  | 0.71839  | 0.70664  | 0.84382  | 0.63323  | 0.68846  | 0.44946  | 0.19108  | 0.1926   | -0.1019  | -0.4828  | -0.03072 | 0.00934  | -0.0771  | 0.35444  | 0.55806  |
| PFL1595w    | -0.42642 | -0.54147 | -1.35735 | -0.30183 | -0.18906 | -0.02179 | 0.06336  | 0.10683  | -1.25878 | -0.31156 | -0.1132  | -0.39819 | -0.02792 | -0.07402 | -0.09263 | 0.23069  | 0.44628  | -0.15498 | 0.1789   | -0.13367 | -0.54284 | -0.40808 | -0.62014 | -0.45887 |
| PFE0175c    | 1.44067  | 0.51423  | -0.01649 | -0.14981 | -0.217   | -0.78627 | -1.12209 | -1.60802 | -2.36664 | -2.37086 | -2.15617 | -2.13291 | -2.32292 | -2.35853 | -2.45246 | -1.95414 | -1.23947 | -0.30821 | 1.60924  | 1.32236  | 1.54247  | 1.47304  | 1.60461  | 1.79966  |
| PFD0690c    | -1.02205 | -1.14852 | -1.05657 | -1.09312 | -1.04053 | -0.59681 | 0.0805   | 0.57866  | 1.00105  | 1.10184  | 1.06834  | 1.19173  | 0.92189  | 0.71518  | 0.31777  | 0.03457  | -0.13412 | -0.29826 | -0.52534 | -0.75958 | -0.82998 | -0.7259  | -0.74158 | -0.73943 |
| PFB0888w    | -1.13551 | -1.19708 | -0.62789 | -0.99054 | -1.07191 | -0.51635 | -0.3648  | -0.16733 | -0.76847 | -0.57757 | -0.22756 | -0.24034 | -0.05892 | -0.05882 | 0.65969  | 0.71254  | 0.62323  | 0.12843  | 0.69516  | -0.24005 | -0.48651 | -0.70688 | -0.67301 | -0.73089 |
| PFL0510c    | 0.2236   | 0.34102  | 0.831    | 0.86441  | 0.81857  | 1.08849  | 0.88742  | 0.49543  | 0.49125  | 0.45467  | 0.43439  | 0.30818  | 0.33658  | 0.13469  | 0.04721  | -0.13731 | -0.14962 | 0.08001  | 0.3411   | 0.53093  | 0.7628   | 0.77198  | 1.3018   | 1.18849  |
| PFF1180w    | -0.28279 | -0.52813 | -0.7099  | -1.1488  | -0.97634 | -0.9944  | -1.01705 | -0.84738 | -0.82714 | -1.02624 | -0.56329 | -0.4332  | -0.00378 | -0.02472 | 0.5484   | 0.7761   | 0.68214  | 0.66022  | 0.93049  | 0.43572  | 0.31438  | -0.10257 | -0.00777 | -0.39214 |
| PFE0250w    | -0.34382 | -0.31208 | 0.05377  | -0.01606 | -0.13169 | 0.01228  | 0.06396  | -0.24755 | 0.10682  | 0.08489  | 0.07192  | 0.18017  | 0.26417  | 0.48466  | 0.53029  | 0.54021  | 0.54573  | 0.28377  | 0.05921  | 0.02616  | 0.02051  | -0.13584 | -0.36123 | -0.56199 |
| PF14 0264   | 1.63568  | 1.54851  | 1.4962   | 1.02424  | 1.11402  | 1.22664  | 0.81438  | 0.26952  | -0.07601 | 0.0755   | -0.13795 | -0.14498 | 0.00678  | 0.18361  | 0.17494  | 0.13705  | 0.20374  | -0.00991 | 0.02108  | 0.01595  | 0.44089  | 0.62685  | 0.73384  | 0.70385  |
| PF11 0245   | -0.2528  | 0.19503  | 0.2752   | 0.31319  | 0.19609  | 0.50204  | 0.41998  | 0.58654  | 0.50254  | 0.55199  | 0.78484  | 0.77822  | 0.65156  | 0.43601  | 0.37226  | 0.02203  | -0.54135 | -0.60812 | -1.04377 | -1.18314 | -1.03258 | -0.82487 | -0.62983 | -0.45907 |
| PF07 0085   | -0.47761 | -0.25927 | 0.07603  | 0.07916  | 0.15325  | 0.5254   | 0.59482  | 0.58453  | 0.9704   | 1.0391   | 1.12086  | 1.11302  | 1.07383  | 0.85478  | 0.5208   | 0.20244  | -0.1198  | -0.39478 | -0.42734 | -0.97336 | -1.05333 | -0.613   | -0.898   | -0.68056 |
| PF07 0124   | 0.61213  | 0.34487  | 0.17761  | 0.21485  | 0.12036  | -0.2038  | -0.00918 | -0.42061 | -0.57888 | -0.46333 | -0.46052 | -0.51289 | -0.58195 | -0.56124 | -0.59061 | -0.15256 | 0.7019   | 0.04378  | 1.38769  | 0.99461  | 0.95875  | 0.70123  | 0.86158  | 0.74583  |
| PFE0595w    | -1.1398  | -0.65157 | -0.18033 | -0.15215 | -0.04452 | 0.22526  | 0.42907  | 0.56645  | 0.45967  | 0.40375  | 0.46681  | 0.47372  | 0.45773  | 0.21867  | 0.39054  | 0.12991  | -0.27786 | -0.21914 | -0.66131 | -0.86737 | -0.83062 | -0.89219 | -0.95521 | -0.65038 |
| PFC0600w    | 0.58706  | 1.08033  | 1.1042   | 1.29871  | 1.31148  | 1.08807  | 1.0658   | 1.29808  | 1.17118  | 1.00842  | 0.68239  | 0.50124  | 0.33781  | 0.06896  | -0.06652 | -0.3013  | -0.35768 | -0.44201 | -0.70114 | -0.56643 | -0.53941 | -0.31686 | -0.13141 | 0.30498  |
| PF14 0395   | 0.22923  | -0.44036 | -1.12731 | -0.45207 | -0.51796 | 0.19085  | 0.4316   | 0.28148  | 0.30838  | -0.01771 | -0.1261  | -0.07833 | -0.11554 | -0.11375 | 0.10775  | 0.36229  | 0.54899  | 0.49837  | 1.08237  | 0.65849  | 0.57888  | 0.36719  | 0.47198  | -0.08915 |
| PF11 0315   | -0.57445 | -0.67789 | -1.9076  | -0.78831 | -1.00585 | -0.99762 | -1.07237 | -0.85675 | -0.20814 | -0.08839 | 0.05005  | 0.25068  | 0.20118  | 0.39991  | 0.69608  | 0.59793  | 0.56913  | 0.66095  | 0.48064  | 0.44162  | 0.24365  | -0.03131 | -0.25194 | -0.44956 |
| PFL1255c    | -0.21092 | -0.20569 | 0.14742  | 0.00311  | -0.28919 | 0.02393  | 0.47361  | 0.53547  | 0.76257  | 0.91301  | 0.91986  | 0.84367  | 0.77939  | 0.5993   | 0.52194  | 0.2834   | 0.00449  | -0.1255  | -0.23679 | -0.27246 | -0.19466 | -0.05944 | -0.14169 | -0.10863 |
| PF07 0121   | 0.54552  | 0.74542  | 0.64232  | 0.75462  | 0.67595  | 0.59447  | 0.66815  | 1.13027  | 0.92091  | 1.1674   | 1.03555  | 0.84717  | 0.43359  | 0.1415   | -0.31522 | -0.73303 | -1.122   | -1.2091  | -1.40016 | -1.13919 | -0.63382 | -0.25278 |          |          |

|            |          |          |          |          |          |          |          |          |          |          |          |          |          |          |          |          |          |          |          |          |          |          |          |          |
|------------|----------|----------|----------|----------|----------|----------|----------|----------|----------|----------|----------|----------|----------|----------|----------|----------|----------|----------|----------|----------|----------|----------|----------|----------|
| PF14 0174  | 0.32812  | 0.65752  | 0.58474  | 0.79563  | 0.70292  | 0.67701  | 0.57168  | 0.7649   | 0.72587  | 0.79482  | 0.78918  | 0.64834  | 0.40401  | 0.04613  | -0.15513 | -0.50285 | -0.65681 | -0.87593 | -0.81075 | -0.90558 | -0.70529 | -0.31394 | -0.11712 | 0.17371  |
| PFE1560c   | -0.72215 | -0.90311 | -1.02976 | -0.88596 | -0.73805 | -0.73757 | -0.67127 | -0.14199 | 0.34853  | 0.7127   | 0.80431  | 0.82839  | 0.73471  | 0.57593  | 0.45048  | 0.33257  | 0.42447  | -0.01158 | 0.25964  | -0.00625 | -0.28882 | -0.24267 | -0.18246 | -0.10898 |
| PF11325w   | -0.67131 | -0.46081 | -0.19961 | -0.62909 | -0.39875 | -0.39755 | -0.74258 | -0.49994 | -0.70654 | -0.59191 | -0.46113 | -0.48278 | -0.14265 | -0.13863 | 0.58057  | 0.68357  | 0.7288   | 0.50936  | 0.60472  | 0.37777  | 0.14385  | -0.27471 | -0.42552 | -0.40686 |
| PF13 0150  | 0.34198  | 0.56583  | 0.62908  | 0.79029  | 0.7349   | 0.82263  | 0.86011  | 0.81018  | 1.00976  | 0.94825  | 0.82731  | 0.71297  | 0.55079  | 0.33998  | -0.08252 | -0.39255 | -0.58428 | -0.59389 | -0.7671  | -0.56179 | -0.41979 | -0.17252 | -0.02641 | 0.11301  |
| PF08 0099  | 0.20985  | 0.93414  | 0.61952  | 0.68215  | 0.32756  | 0.69115  | 0.82796  | 1.25882  | 1.25139  | 0.81035  | 0.96742  | 1.01504  | 0.49259  | 0.44248  | 0.78471  | 0.66327  | -0.27556 | 0.11819  | 0.50473  | -0.24823 | -0.41465 | -0.42836 | -0.55484 | -0.78126 |
| PF14 0308  | -0.35715 | 0.04711  | 0.41129  | 0.29266  | 0.29559  | 0.40426  | 0.37867  | 0.1955   | 0.29412  | 0.49223  | 0.66402  | 0.82129  | 0.82222  | 0.72407  | 0.58032  | 0.27431  | 0.05898  | -0.07866 | -0.08631 | -0.46981 | -0.6073  | -0.3606  | -0.49441 | -0.33704 |
| PF11 0113  | 0.0216   | -0.30115 | -0.60625 | -0.58623 | -0.6244  | -0.72508 | -0.3767  | -0.53522 | -0.83321 | -0.5394  | 0.02178  | 0.17718  | 0.34965  | 0.36533  | 0.65385  | 0.89228  | 0.42573  | 0.82864  | 0.98251  | 0.54062  | 0.48782  | 0.2744   | 0.18081  | -0.06063 |
| PF13 0106  | 0.95985  | 0.85528  | 0.83391  | 0.83135  | 0.82619  | 0.5329   | 0.2833   | -0.00772 | -0.56756 | -0.74352 | -0.83261 | -0.94177 | -0.958   | -0.82485 | -0.76167 | -0.68397 | -0.62681 | -0.45175 | -0.10555 | 0.46341  | 0.69565  | 0.81837  | 0.95225  | 0.97425  |
| PFL1100w   | -0.34238 | -0.62495 | -1.31889 | -0.58844 | -0.51769 | -0.39589 | -0.26743 | 0.03702  | 0.10052  | 0.47381  | 0.49543  | 0.71047  | 0.66427  | 0.48619  | 0.26896  | 0.15371  | -0.04334 | -0.14968 | -0.25758 | -0.40448 | -0.51329 | -0.31952 | -0.20399 | -0.17335 |
| MAL8P1.60  | -0.05872 | -0.01571 | -0.13012 | -0.03068 | -0.22462 | -0.28646 | -0.27012 | -0.27092 | -0.27552 | 0.0942   | 0.23134  | 0.34527  | 0.39185  | 0.38426  | 0.30545  | 0.29608  | 0.31267  | 0.42215  | 0.22099  | 0.468    | 0.39546  | 0.26532  | 0.26373  | 0.08459  |
| PF07 0118  | -0.61442 | -0.75813 | -0.61624 | -0.94691 | -0.76166 | -0.89781 | -0.79194 | -0.83699 | -0.35798 | 0.06349  | 0.05785  | 0.28869  | 0.52488  | 0.85353  | 0.63031  | 0.51272  | 0.50225  | 0.48107  | -0.32183 | 0.20704  | -0.12387 | -0.26398 | -0.43153 | -0.5464  |
| PFF0655c   | -0.22843 | -0.65278 | -0.34905 | -0.1333  | 0.23037  | 0.35128  | 0.54022  | 0.70345  | 0.71261  | 0.6381   | 0.50964  | 0.44624  | 0.40833  | 0.4432   | 0.18584  | 0.18821  | -0.14894 | 0.19603  | 0.08725  | 0.24536  | -0.19597 | -0.18736 | 0.21703  | 0.16718  |
| PFF0105w   | -0.33424 | 0.16266  | 0.39037  | 0.59104  | 0.61222  | 0.9481   | 0.966    | 1.26228  | 1.37191  | 1.35766  | 1.53444  | 1.31773  | 1.14326  | 0.46305  | 0.35424  | -0.09964 | -0.5528  | -0.68657 | -0.50535 | -0.9539  | -0.10754 | -0.56951 | -0.36097 | -0.28308 |
| PFL0325w   | 0.47069  | 0.7523   | 0.62779  | 0.73572  | 0.96979  | 0.83339  | 0.57773  | 0.62087  | 0.23374  | 0.08839  | -0.02991 | -0.24299 | -0.18934 | -0.19852 | -0.22622 | -0.43578 | -0.04678 | -0.00251 | -0.24926 | 0.332    | 0.59386  | 0.38744  | 0.65999  | 0.80523  |
| PF14 0142  | -0.72935 | -1.1978  | -1.63425 | -2.00541 | -2.2378  | -2.21926 | -2.17295 | -1.78711 | -1.51002 | -1.19014 | -0.7739  | -0.53952 | -0.37498 | -0.18742 | 0.3484   | 0.71044  | 0.53326  | 1.01511  | 0.75081  | 0.5675   | 0.15601  | -0.33086 | -0.43405 | -0.80043 |
| PFI0130c   | -0.24222 | -0.38623 | -0.13441 | -0.07071 | 0.09061  | 0.83425  | 0.906    | 1.24577  | 1.27699  | 0.91226  | 0.82597  | 0.8404   | 0.65985  | 0.40417  | 0.52217  | 0.60841  | 0.41842  | 0.51623  | 0.51258  | 0.13041  | -0.00585 | -0.08964 | -0.29696 | -0.3856  |
| MAL8P1.10  | 0.14832  | 0.50363  | 0.75792  | 0.63107  | 0.61243  | 0.75068  | 0.6603   | 0.61742  | 0.70356  | 0.63647  | 0.60021  | 0.4952   | 0.34039  | 0.05409  | 0.02111  | -0.03979 | -0.18552 | -0.30894 | -0.27599 | -0.64482 | -0.58542 | -0.356   | -0.2694  | 0.10522  |
| PF08 0026  | 0.57236  | 1.01218  | 0.92872  | 1.13435  | 0.95391  | 0.70896  | 0.69786  | 0.68208  | 0.6901   | 0.58529  | 0.49118  | 0.40235  | 0.15018  | -0.20405 | -0.50206 | -0.95342 | -1.01893 | -1.01117 | -1.41205 | -0.70496 | -0.32861 | 0.04519  | 0.26516  | 0.43735  |
| PFF0820w   | 0.16103  | 0.47813  | 0.54813  | 0.32073  | 0.48456  | 0.57462  | 0.58326  | 0.52014  | 0.61738  | 0.57402  | 0.52176  | 0.49575  | 0.59722  | 0.63335  | 0.49708  | 0.20508  | 0.28108  | -0.03659 | -0.75107 | -0.56462 | -0.57331 | -0.29967 | -0.35291 | -0.08755 |
| PFE0870w   | -1.21063 | -1.00485 | -0.7868  | -0.66065 | -0.58913 | -0.39937 | -0.34    | -0.28415 | 0.08509  | 0.3539   | 0.49582  | 0.79176  | 0.81523  | 0.87517  | 0.56913  | 0.33817  | 0.30303  | -0.24647 | -0.42769 | -0.48713 | -0.64876 | -0.89367 | -0.91907 | -0.90131 |
| PFD0540c   | -0.31067 | 0.24178  | 0.51248  | 0.57134  | 0.82486  | 0.82962  | 0.70488  | 0.71445  | 0.45815  | 0.72997  | 0.75962  | 0.62665  | 0.77211  | 0.55233  | 0.4355   | 0.31007  | 0.02063  | -0.23424 | -0.353   | -0.42994 | -0.42458 | -0.05457 | -0.01051 | 0.04924  |
| MAL13P1.26 | -0.0643  | 0.37561  | 0.55814  | 0.64104  | 0.60936  | 0.52491  | 0.54541  | 0.31168  | 0.67335  | 0.78884  | 0.75264  | 0.70963  | 0.81948  | 0.69127  | 0.27825  | -0.17083 | -0.11891 | -0.58788 | -1.20467 | -1.06496 | -0.93457 | -0.57544 | -0.56407 | -0.37824 |
| PF14 0507  | 0.22059  | 0.16375  | 0.54015  | 0.5336   | 0.81832  | 0.84626  | 0.78951  | 0.42401  | 0.18037  | 0.24915  | 0.10605  | 0.13439  | 0.29707  | 0.52146  | 0.37714  | 0.31442  | 0.39156  | 0.11627  | -0.23017 | 0.08914  | -0.25259 | -0.0939  | -0.13855 | -0.09823 |
| PFL1565c   | 0.12546  | -0.34993 | -0.65303 | -0.91135 | -1.31337 | -1.70534 | -2.05842 | -2.49025 | -2.73101 | -3.14356 | -3.17858 | -3.40229 | -3.04449 | -2.35021 | -1.13761 | -0.49378 | 0.21466  | 0.31903  | 1.10417  | 1.05701  | 1.04095  | 0.69526  | 0.72792  | 0.75161  |
| PFB0625w   | -0.43283 | -0.71108 | -0.08937 | -0.33777 | -0.22469 | -0.19402 | -0.18973 | -0.19529 | -0.87207 | -0.08313 | 0.40551  | 0.01097  | -0.0228  | -0.19896 | -0.23886 | -0.42217 | -1.96808 | -0.67487 | -0.62817 | -0.46621 | -0.48808 | -0.539   | -0.40923 | -0.23679 |
| PF10 0380  | -0.52726 | -0.39091 | 0.15898  | 0.24704  | 0.43356  | 0.99815  | 1.3645   | 1.69791  | 1.8139   | 1.67841  | 1.24884  | 0.90996  | 0.24057  | -0.45898 | -1.06957 | -1.65215 | -2.0758  | -1.76238 | -1.30576 | -1.35653 | -1.17116 | -0.91577 | -0.73981 | -0.39514 |
| PFD0170c   | -0.85023 | -1.18159 | -1.20901 | -1.31427 | -1.39743 | -1.4672  | -1.4428  | -1.53278 | -0.85658 | -0.50837 | -0.13651 | 0.38825  | 0.54871  | 0.77027  | 0.7596   | 0.83071  | 0.62223  | 0.47639  | 0.36317  | 0.13621  | -0.21261 | -0.41971 | -0.58011 | -0.84412 |
| PF13 0065  | -0.73619 | -0.69706 | -0.1605  | -0.37561 | -0.3127  | -0.11153 | -0.19125 | -0.0214  | 0.12182  | 0.0782   | 0.27153  | 0.29345  | 0.35784  | 0.24822  | 0.49013  | 0.51741  | 0.17912  | 0.27157  | 0.10963  | -0.4708  | -0.81336 | -0.76539 | -0.7043  | -0.91089 |
| PF11 0264  | -0.42146 | -0.04623 | -0.22023 | 0.5261   | 0.67705  | 1.01033  | 1.00308  | 1.17548  | 1.34802  | 1.31345  | 1.16054  | 1.00833  | 0.75254  | 0.38868  | 0.0487   | -0.14972 | -0.127   | -0.5628  | -0.58137 | -0.61582 | -0.69774 | -0.59887 | -0.44212 | -0.33008 |
| MAL7P1.162 | 0.46217  | 0.26927  | 0.19749  | 0.31448  | 0.07603  | 0.25396  | 0.19856  | 0.11678  | 0.07026  | 0.09957  | -0.0144  | -0.01907 | -0.09591 | 0.008    | -0.0263  | 0.16648  | 0.16366  | 0.38532  | 0.22698  | 0.38607  | 0.54331  | 0.56033  | 0.44046  | 0.3268   |
| PF14 0195  | 0.7042   | 0.65886  | 0.50687  | 0.39219  | 0.43243  | 0.57051  | 0.74167  | 0.51707  | 0.54711  | 0.46187  | 0.54416  | 0.43939  | 0.40964  | 0.24391  | 0.09408  | -0.0365  | -0.1224  | 0.24515  | 0.15583  | 0.39554  | 0.54677  | 0.77289  | 0.71281  | 0.70855  |
| MAL7P1.163 | -0.53796 | -0.26685 | -0.3054  | -0.50369 | -0.31109 | -0.03794 | 0.39865  | 0.74261  | 0.86806  | 0.70197  | 0.70091  | 0.62573  | 0.61619  | 0.44879  | 0.24351  | 0.07741  | 0.0289   | -0.14697 | 0.10345  | 0.17533  | 0.17244  | 0.19026  | 0.22362  | 0.34767  |
| PFL0135w   | 0.75207  | 0.71427  | 0.81921  | 0.96977  | 0.974    | 0.98348  | 0.93883  | 1.03521  | 1.07576  | 0.88009  | 0.70191  | 0.46484  | 0.18528  | -0.09605 | -0.28665 | -0.42065 | -0.60126 | -0.1736  | -0.30372 | -0.00629 | 0.12492  | 0.26836  | 0.46944  | 0.67518  |
| PFE0590w   | -0.76218 | -0.57324 | -0.51669 | -0.30122 | 0.23687  | -0.44173 | -0.01184 | 1.00921  | 1.21521  | 1.33455  | 1.33401  | 1.33454  | 1.14376  | 0.80703  | 0.51122  | 0.31483  | -0.11187 | -0.02583 | -0.27994 | -0.43552 | -0.31682 | -0.56136 | -0.6828  | -0.63214 |
| PFD0225w   | -1.26361 | -1.00603 | 0.10895  | 0.74102  | 1.3049   | 1.74913  | 1.78329  | 1.0944   | 1.13563  | 0.96699  | 0.57884  | 0.44441  | 0.45674  | 0.44181  | -0.17999 | -0.44748 | -0.52393 | -0.752   | -1.3912  | -1.20205 | -1.20356 | -0.99551 | -0.99232 | -0.9622  |
| PF14 0290  | 0.22232  | 0.62009  | 0.80524  | 0.83161  | 0.88438  | 0.97235  | 0.5517   | 0.58323  | 0.27004  | -0.06828 | 0.0356   | -0.55471 | -0.46346 | -0.6564  | -0.83292 | -0.76984 | -0.34742 | -0.53213 | 0.2766   | 0.41998  | 0.79618  | 0.60453  | 1.09075  | 1.32714  |
| PF13 0056  | 0.77382  | 0.49195  | 0.60614  | 0.31321  | 0.39206  | 0.48627  | 0.43658  | 0.37157  | 0.48465  | 0.41044  | 0.33668  | 0.23529  | -0.0983  | -0.34705 | -0.66868 | -0.97969 | -0.77008 | -0.84757 | -0.38124 | -0.04638 | 0.1896   | 0.4191   | 0.6014   | 0.76356  |
| PFE1505w   | 1.49041  | 0.92054  | 0.78326  | 0.53829  | 0.24518  | 0.07144  | -0.10021 | -0.06129 | -0.38828 | -0.61291 | -0.74366 | -0.84494 | -0.81407 | -1.00041 | -0.71707 | -0.70307 | -0.70036 | -0.19449 | 1.01008  | 0.96618  | 1.08362  | 1.29571  | 1.44193  | 1.29503  |
| PF11 0407  | 0.4673   | 0.02953  | -0.09952 | -0.03642 | -0.07988 | -0.40221 | -0.34246 | -0.38532 | -0.28357 | -0.18499 | 0.14765  | 0.43581  | 0.31425  | 0.17498  | 0.2346   | -0.44072 | -0.16127 | 0.25821  | 0.21945  | 0.40142  | 0.10725  | 0.22238  | 0.50579  | 0.50579  |
| PF07 0024  | 0.28636  | 0.22348  | 0.36204  | 0.23981  | 0.23791  | 0.14323  | 0.05567  | -0.3642  | -0.46757 | -0.67479 | -0.87352 | -0.8074  | -0.57327 | -0.12213 | -0.09927 | 0.09049  | 0.40364  | 0.23235  | -0.14779 | 0.26139  | 0.26151  | 0.28065  | 0.2887   | 0.13434  |
| PF14 0613  | -0.77777 | -1.06219 | -0.65179 | -1.10676 | -1.20699 | -0.98165 | -0.6444  | -0.62028 | -0.02324 | 0.19569  | -0.00298 | 0.12523  | 0.31869  | 0.64192  | 0.53735  | 0.48781  | 0.57142  | 0.42591  | -0.21314 | 0.0616   |          |          |          |          |

|                     |          |          |          |          |          |          |          |          |          |          |          |          |          |          |          |          |          |          |          |          |          |          |          |          |
|---------------------|----------|----------|----------|----------|----------|----------|----------|----------|----------|----------|----------|----------|----------|----------|----------|----------|----------|----------|----------|----------|----------|----------|----------|----------|
| PFE1125w            | -0.69885 | -0.84615 | -1.15498 | -0.97148 | -1.20075 | -1.19186 | -1.34273 | -1.14013 | -0.83121 | -0.6413  | -0.24633 | 0.01959  | 0.3606   | 0.34898  | 0.73036  | 0.86115  | 0.4144   | 0.53836  | 1.01505  | 0.60958  | 0.24389  | -0.10298 | -0.1109  | -0.59188 |
| PF00770c            | -0.63059 | 0.24844  | 0.64769  | 0.43131  | 0.5491   | 0.63697  | 0.52897  | 0.61877  | 0.509    | 0.72721  | 1.41905  | 0.64986  | 0.56796  | 0.34582  | 0.23797  | -0.01945 | -0.92373 | -0.89737 | -1.48014 | -1.91373 | -1.77629 | -1.5094  | -1.34685 | -0.92177 |
| MAL7P1.88           | -0.70755 | -0.30927 | -0.07398 | 0.10629  | 0.40855  | 0.42472  | 0.61279  | 0.75312  | 1.06251  | 1.14944  | 1.12959  | 1.01002  | 0.884    | 0.36158  | 0.15351  | -0.1546  | -0.3398  | -0.55577 | -0.68357 | -0.68864 | -0.65798 | -0.52696 | -0.47794 | -0.29313 |
| MAL13P1.279         | -0.96534 | -1.077   | -1.05507 | -1.03673 | -1.31537 | -1.1338  | -1.24021 | -1.1554  | -0.97717 | -0.07741 | 0.51076  | 0.9473   | 1.1217   | 0.7917   | 0.87551  | 0.83499  | 0.44275  | 0.24986  | 0.49143  | -0.04443 | -0.57828 | -0.70136 | -0.75813 | -0.89951 |
| PF14_0427           | -0.24777 | -0.23552 | -0.40267 | -0.39387 | -0.35983 | -0.3282  | -0.37364 | -0.51238 | -0.81625 | -0.89708 | -0.74915 | -0.57062 | -0.22357 | 0.10974  | 0.58775  | 0.81043  | 0.66293  | 0.7263   | 0.69645  | 0.56531  | 0.43954  | -0.09758 | -0.14849 | -0.33914 |
| PFC0_0098           | -0.03716 | -0.24376 | -0.21442 | -0.17703 | -0.44048 | -0.14428 | 0.16199  | 0.62423  | 0.92151  | 0.82969  | 0.80602  | 0.81938  | 0.6477   | 0.71394  | 0.44144  | 0.276    | 0.09545  | 0.044    | -0.11349 | -0.26097 | -0.2003  | -0.24015 | -0.15668 | -0.12224 |
| PF21060c            | 0.34292  | 0.45358  | 0.18957  | 0.34088  | 0.3141   | 0.13116  | 0.22368  | 0.41644  | 0.29611  | 0.13376  | 0.0052   | 0.01729  | -0.04049 | 0.0521   | 0.10503  | 0.02696  | -0.1893  | 0.23329  | 0.15233  | 0.21893  | 0.35541  | 0.17872  | 0.19146  | 0.45405  |
| PFE0735w            | 0.05782  | 0.23928  | 0.16258  | 0.3948   | 0.24662  | 0.28098  | 0.09828  | 0.11261  | 0.10128  | 0.15808  | 0.28872  | 0.39855  | 0.39721  | 0.3932   | 0.42334  | 0.48297  | 0.35088  | 0.25192  | -0.16756 | -0.1134  | -0.10799 | -0.11938 | -0.22122 | -0.11335 |
| PF11_0095           | 0.31078  | 0.17462  | 0.25463  | 0.01891  | 0.1319   | 0.23712  | 0.12989  | 0.20123  | 0.27274  | 0.3664   | 0.33036  | 0.51361  | 0.10514  | -0.13545 | -0.42397 | -0.46954 | -0.38321 | -0.13749 | 0.50703  | 0.20828  | 0.25277  | 0.15142  | 0.50706  | 0.39102  |
| PF13_0218           | -0.92448 | -0.55622 | -1.19073 | -0.80485 | -0.59428 | -0.24869 | 0.46923  | 0.55917  | 0.79074  | 0.68794  | 0.65523  | 0.63515  | 0.60818  | 0.47657  | 0.44619  | 0.24805  | 0.32161  | 0.25156  | 0.00809  | -0.34846 | -0.22897 | -0.6147  | -0.57696 |          |
| PFL2280w            | -0.04376 | -0.45385 | -0.67087 | -0.60744 | -0.70148 | -0.83519 | -1.10014 | -1.04757 | -0.98531 | -1.06833 | -0.83229 | -0.94401 | -0.70203 | -0.60108 | -0.07686 | 0.45578  | 0.96596  | 0.57139  | 0.93194  | 0.86066  | 0.78576  | 0.62931  | 0.60557  | 0.4673   |
| PF10_0286           | -0.85221 | -0.89698 | -0.94701 | -0.9885  | -0.82029 | -0.82984 | -0.66082 | -0.18144 | 0.39705  | 0.75738  | 1.13383  | 1.16935  | 1.00316  | 0.78895  | 0.27992  | -0.02184 | -0.07896 | 0.01745  | -0.82154 | -0.45482 | -0.51823 | -0.35504 | -0.49729 | -0.53598 |
| PF14_0105           | -0.82768 | -1.18372 | -0.97661 | -1.53232 | -1.88066 | -2.09515 | -2.24137 | -2.30318 | -2.4005  | -2.07385 | -1.47007 | -0.84026 | 0.06238  | 0.44967  | 0.95624  | 1.05451  | 0.65019  | 0.87232  | 0.59237  | 0.26835  | -0.37722 | -0.4672  | -0.70253 | -0.98416 |
| PF10_0081           | -0.64558 | -0.70752 | -0.73283 | -0.75102 | -0.79425 | -0.66969 | -0.60137 | -0.60262 | -0.56806 | -0.42061 | -0.25414 | -0.12592 | 0.04785  | 0.13924  | 0.52616  | 0.57761  | 0.31402  | 0.46777  | 0.3583   | -0.0163  | -0.12035 | -0.42729 | -0.60745 | -0.66214 |
| PFC0580c            | 0.47684  | 0.22695  | 0.96248  | 0.43416  | 0.52347  | 0.36473  | 0.28723  | -0.00719 | 0.015    | 0.23995  | 0.12119  | 0.31457  | 0.36876  | 0.36408  | 0.10978  | 0.15623  | 0.04189  | 0.29249  | 0.13709  | 0.40986  | 0.53753  | 0.50933  | 0.51759  | 0.75389  |
| PFE1460w            | -0.86074 | -0.81903 | -0.51282 | -1.0261  | -0.78181 | -0.07933 | 0.05663  | 0.1742   | 0.54582  | 0.61431  | 0.6561   | 0.72049  | 0.79364  | 0.6952   | 0.9      | 0.71159  | 0.55854  | 0.25303  | 0.58596  | 0.01709  | -0.25627 | -0.25556 | -0.49967 | -0.56523 |
| PF14_0106           | 0.53544  | 0.01028  | -0.64809 | -0.43573 | -0.64142 | -0.72175 | -1.04999 | -1.29251 | -1.528   | -1.80035 | -1.81786 | -1.74476 | -1.75219 | -1.68282 | -0.59388 | 0.41493  | 0.78653  | 0.95298  | 1.6882   | 1.24938  | 1.13148  | 0.92332  | 0.82865  | 0.28768  |
| PF13_0011           | -0.69551 | -0.88986 | -1.14632 | -1.4702  | -1.25101 | -0.76195 | -1.58132 | -1.43811 | -1.59848 | -1.22683 | -1.25051 | -1.33983 | -0.84569 | -0.62642 | -0.5163  | -0.28747 | -0.03411 | 0.53851  | -0.02938 | 0.44012  | 0.38239  | 0.40965  | 0.70527  | 0.89749  |
| PFB0460c            | -0.90022 | -0.8558  | -0.85537 | -1.17916 | -1.16447 | -1.2623  | -1.20886 | -1.08871 | -0.68325 | -0.1307  | -0.06528 | 0.2365   | 0.56384  | 0.88283  | 0.80791  | 0.71503  | 0.73537  | 0.60365  | -0.14907 | 0.15506  | -0.03645 | -0.26033 | -0.66841 | -0.94795 |
| PF13_0088           | 0.18738  | 0.17437  | 0.25083  | 0.24963  | 0.30578  | 0.22636  | 0.38556  | 0.65206  | 0.54182  | 0.40052  | 0.42131  | 0.53797  | -0.08984 | -0.17869 | -0.19982 | -0.1523  | -0.33616 | 0.00026  | -0.16218 | -0.25331 | -0.29314 | -0.37139 | -0.24529 | -0.06688 |
| PF14_0281           | 0.14363  | -0.13258 | -0.20604 | -0.68169 | -0.66958 | -0.78192 | -1.03135 | -0.99925 | -1.62016 | -2.07652 | -1.96899 | -2.22954 | -2.32053 | -2.11287 | -0.06169 | 0.53589  | 0.65481  | 1.2384   | 0.90253  | 0.82061  | 0.68558  | 0.62257  | 0.25829  |          |
| PF10_0137           | 0.16594  | 0.05419  | -0.28218 | -0.42928 | -0.60207 | -0.86051 | -1.01712 | -1.16435 | -1.26154 | -0.87694 | -0.40958 | 0.07587  | 0.0975   | -0.03904 | -0.14742 | -0.13592 | 0.0203   | 0.26695  | 0.91722  | 0.69453  | 0.84617  | 0.59193  | 0.76062  | 0.65596  |
| PF00785c            | 0.85074  | 0.57647  | 0.48021  | 0.33324  | 0.11366  | 0.13329  | 0.08695  | -0.24253 | -0.33169 | -0.4269  | -0.62134 | -0.67223 | -0.52335 | -0.6058  | -0.6184  | -0.61537 | -0.49516 | 0.04846  | 0.07867  | 0.47807  | 0.67246  | 0.64146  | 0.71709  | 0.61285  |
| PFB0485c            | 1.29509  | 1.43945  | 1.22987  | 1.43703  | 1.38842  | 1.14045  | 0.91979  | 0.95867  | 0.33156  | 0.06595  | 0.01989  | -0.20334 | -0.64806 | -0.90531 | -1.19088 | -1.34637 | -1.68481 | -1.60431 | -0.66523 | -0.24251 | 0.47856  | 0.79352  | 1.07455  | 1.31445  |
| PF14_0751           | -0.34376 | -0.31767 | -0.53635 | -0.55649 | -0.40774 | -0.28824 | 0.20277  | 0.70099  | 1.16352  | 1.01525  | 0.86273  | 0.59531  | 0.71127  | 0.51343  | 0.20237  | 0.18322  | -0.08742 | -0.01488 | -0.11599 | -0.13259 | -0.00333 | 0.0002   | -0.2065  | 0.0648   |
| PFE0935c            | 0.13933  | 0.5599   | 0.7258   | 0.7261   | 1.02934  | 1.30858  | 0.85905  | 0.68513  | 0.70048  | 0.62978  | 0.29751  | 0.29211  | 0.25239  | 0.2913   | 0.06668  | 0.04901  | 0.15327  | 0.162    | -0.60594 | 0.30172  | 0.52319  | 0.74854  | 1.11408  | 0.99959  |
| PFA0535c            | 0.05711  | -0.23526 | -0.38523 | -0.48979 | -0.60737 | -0.67578 | -0.73499 | -0.7689  | -0.53039 | -0.39878 | -0.3671  | -0.27041 | -0.06862 | 0.15481  | 0.28929  | 0.55733  | 0.71419  | 0.76037  | 0.52931  | 0.69638  | 0.54668  | 0.6019   | 0.31634  | -0.04282 |
| PFE0790c            | -0.09718 | 0.03388  | 0.21937  | 0.50598  | 0.55257  | 0.6872   | 0.64426  | 0.79293  | 0.57286  | 0.60552  | 0.95237  | 0.98646  | 0.7888   | 0.66281  | 0.64615  | 0.59169  | 0.00175  | 0.27238  | 0.43622  | 0.15882  | 0.09372  | -0.19623 | -0.11775 | 0.10675  |
| PFA0525w            | 0.66216  | 0.02555  | 0.28575  | 0.04771  | -0.0664  | 0.06437  | 0.11701  | 0.24999  | 0.44484  | 0.40512  | 0.41124  | 0.39592  | -0.01288 | -0.24391 | -0.56162 | -0.77283 | -1.01948 | -0.45004 | 0.25536  | 0.25857  | 0.43195  | 0.73991  | 0.6514   | 0.66022  |
| 1399.pre-tRNA-Gly-1 | -0.4785  | 0.37388  | -0.50506 | 0.08946  | 0.31399  | -0.02274 | -0.4355  | 0.1354   | -0.81498 | -0.53982 | -0.46777 | -0.6552  | -0.48539 | -0.73438 | -0.15649 | -0.16622 | -1.19925 | 0.46206  | 0.60926  | 0.36022  | 0.782    | 1.31916  | 1.08273  | 1.05326  |
| PFE1135w            | -0.66777 | -0.68108 | -0.60802 | -0.92163 | -1.25171 | -1.28376 | -1.34123 | -1.21387 | -1.3099  | -1.27809 | -0.76524 | -0.21696 | 0.2666   | 0.56692  | 1.00938  | 1.10254  | 0.4557   | 0.74252  | 0.59325  | -0.00445 | -0.33345 | -0.10843 | -0.37502 | -0.65787 |
| PF0515c             | -0.13256 | 0.30265  | 0.59122  | 0.64169  | 0.78646  | 0.71318  | 0.70176  | 0.82619  | 0.80354  | 0.91312  | 1.09601  | 0.90897  | 0.66726  | 0.22435  | 0.07835  | -0.19668 | -0.43565 | -0.51942 | -0.76815 | -1.07764 | -1.4122  | -1.14856 | -0.80428 | -0.46304 |
| PFL1495w            | -0.13205 | -0.32386 | -0.00864 | -0.54172 | -0.35548 | -0.51812 | -0.63418 | -0.63127 | -0.8175  | -0.67895 | -0.47405 | -0.25869 | 0.08734  | 0.2853   | 0.27792  | 0.24816  | 0.2596   | 0.2842   | 0.04584  | 0.21317  | 0.2804   | 0.27614  | 0.37535  | 0.32779  |
| PF13_0216           | -0.25755 | -0.5288  | -0.76203 | -1.02172 | -1.24356 | -1.28682 | -1.51856 | -1.47683 | -1.70877 | -1.48811 | -1.00099 | -0.91688 | -0.64522 | -0.59382 | 0.1229   | 0.37709  | 0.42289  | 0.41692  | 0.86453  | 0.44196  | 0.27727  | 0.14195  | 0.04604  | -0.03247 |
| PF11_0341           | 0.53047  | 0.74054  | 0.79816  | 0.92088  | 0.62821  | 0.69709  | 0.71624  | 0.69563  | 0.59288  | 0.66234  | 0.58549  | 0.50921  | 0.19985  | -0.20515 | -0.43155 | -0.86547 | -0.76069 | -1.08524 | -0.81227 | -0.71297 | -0.20405 | 0.22567  | 0.40889  | 0.57255  |
| PF14_0077           | -0.25253 | -0.67714 | -0.64674 | -0.35419 | -0.40446 | -0.12599 | 0.12663  | 0.51094  | 0.80005  | 0.72296  | 0.93367  | 0.8783   | 0.64405  | 0.40298  | 0.20505  | -0.0034  | -0.58216 | -0.80294 | -0.22936 | -0.61425 | -0.62499 | -0.49292 | -0.27036 | -0.10238 |
| PF13_0198           | 0.70107  | 0.2322   | -0.30562 | -0.85084 | -1.18096 | -1.52667 | -1.93162 | -2.20723 | -2.82586 | -2.73655 | -2.96257 | -2.91451 | -3.19974 | -3.09562 | -3.41291 | -2.96636 | -1.38711 | -1.0257  | 0.6419   | 1.17128  | 1.297    | 1.16967  | 1.18445  | 1.10291  |
| MAL13P1.179         | 0.39479  | 0.55195  | 0.56236  | 0.55541  | 0.50048  | 0.4557   | 0.3543   | 0.45782  | 0.06342  | -0.02927 | 0.00114  | 0.03759  | -0.11451 | -0.32181 | -0.00945 | -0.06759 | -0.19362 | -0.5009  | -0.01905 | -0.32119 | -0.14031 | 0.02878  | 0.19061  | 0.45259  |
| PF11_0429           | -0.14363 | -0.52038 | -1.3209  | -0.92572 | -1.24632 | -0.79753 | -1.4465  | -1.47923 | -1.57744 | -1.46448 | -1.70287 | -1.66682 | -1.31007 | -0.71661 | 0.18574  | 0.99459  | 1.15575  | 1.05475  | 1.54785  | 1.26646  | 1.04687  | 0.57938  | 0.35185  | -0.40768 |
| PFL0595c            | -0.67169 | -0.61106 | -0.40406 | -0.23914 | 0.12547  | 0.23469  | 0.37658  | 0.27411  | 0.36507  | 0.46059  | 0.633    | 0.4928   | 0.78557  | 0.88202  | 0.91671  | 0.72452  | 0.24426  | 0.43968  | 0.39841  | 0.10822  | -0.18924 | -0.63692 | -0.80324 | -0.87037 |
| MAL13P1.50          | -0.23545 | -0.11188 | 0.0018   | 0.08483  | 0.17143  | 0.38233  | 0.3052   | 0.29316  | 0.17533  | 0.37954  | 0.72582  | 0.41242  | 0.59937  | 0.60995  | 0.59555  | 0.48806  | 0.20811  | 0.0544   | 0.21347  | -0.13848 | -0.49632 | -0.56955 |          |          |

|               |          |          |          |          |          |          |          |          |          |          |          |          |          |          |          |          |          |          |          |          |          |          |          |          |
|---------------|----------|----------|----------|----------|----------|----------|----------|----------|----------|----------|----------|----------|----------|----------|----------|----------|----------|----------|----------|----------|----------|----------|----------|----------|
| PF11 0336     | 0.27147  | 0.60882  | 0.66837  | 0.75437  | 0.54135  | 0.65361  | 0.54787  | 0.38087  | 0.45059  | 0.31716  | 0.25546  | 0.35087  | 0.24087  | 0.18635  | 0.35995  | 0.34267  | 0.25949  | 0.22378  | 0.19563  | 0.03105  | -0.0615  | 0.00187  | 0.01326  | 0.21089  |
| PFC0040w      | 0.23735  | 0.29168  | -0.03446 | 0.28568  | 0.85669  | 0.56331  | 0.50573  | 0.87333  | 0.98015  | 1.25388  | 1.38787  | 1.15658  | 0.92527  | 0.65013  | 0.21998  | -0.41972 | -0.53132 | -0.86624 | -0.88498 | -0.90052 | -0.40919 | -0.56644 | -0.34201 | 0.2385   |
| PF10440w      | 0.48723  | -0.48528 | 0.54794  | -0.54794 | 0.47041  | 0.38102  | 0.10776  | -0.24214 | -0.18498 | -0.26913 | -0.43389 | -0.36884 | -0.28433 | 0.01172  | 0.31482  | 0.64331  | 0.49522  | 0.88322  | 0.8184   | 0.85328  | 0.85148  | 0.60113  | 0.49465  | 0.19409  |
| PFC0740c      | 0.51533  | 0.73082  | 0.23166  | 0.44581  | 0.10679  | -0.10455 | -0.08938 | -0.15677 | -0.47678 | -0.51552 | -0.62223 | -0.53723 | -0.66751 | -0.70692 | -0.39474 | -0.25187 | -0.73373 | -0.29254 | 0.20274  | 0.30502  | 0.40083  | 0.52143  | 0.49942  | 0.59915  |
| PF11 0371     | -0.5609  | -0.94163 | -0.86682 | -1.29722 | -1.44833 | -1.3594  | -1.51812 | -1.7106  | -1.56236 | -1.02083 | -0.73097 | -0.37858 | 0.02793  | 0.62957  | 0.7289   | 0.75913  | 0.9783   | 0.88959  | 0.05227  | 0.65132  | 0.31599  | -0.21424 | -0.54883 | -0.82758 |
| PFA0760w      | -0.11127 | 0.14215  | -1.23792 | -0.2312  | -0.67918 | 0.19312  | 0.65666  | 1.67446  | 1.60268  | 1.10592  | 0.96361  | 0.5602   | 0.61994  | 0.23175  | 0.28978  | 0.01621  | -0.20632 | 0.36948  | 0.91767  | -0.04925 | 0.43659  | 0.65896  | 0.5286   | 0.14252  |
| PF07 0032     | -0.47716 | -0.68596 | -0.63219 | -0.54548 | -0.62288 | -0.67251 | -0.74549 | -0.86272 | -1.27635 | -1.21567 | -0.27949 | -0.50587 | 0.15017  | 0.28965  | 0.68985  | 0.84362  | 0.68871  | 0.45876  | 0.47052  | 0.22097  | -0.09741 | -0.02167 | 0.02385  |          |
| PF11 0279     | 0.19112  | 0.57922  | 0.7308   | 0.95165  | 1.42003  | 1.54284  | 1.55603  | 1.43302  | 1.01549  | 0.87715  | 0.56832  | 0.20435  | 0.16933  | 0.04549  | -0.25424 | -0.41881 | -0.25543 | -0.27017 | -0.31213 | 0.0733   | 0.42231  | 0.32095  | 0.56213  | 0.80759  |
| PFC0381c      | 0.67245  | 0.96584  | 0.95726  | 1.00065  | 1.19279  | 1.08316  | 1.06802  | 1.06236  | 0.52896  | -0.00931 | 0.22408  | 0.11579  | 0.06539  | 0.08118  | 0.12561  | 0.22592  | 0.27692  | 0.56599  | 0.36339  | 0.51251  | 0.59994  | 0.45256  | 0.46981  | 0.52362  |
| PFL2345c      | -1.00642 | -0.91427 | -0.97063 | -0.72743 | -0.65804 | -0.72612 | -0.6013  | -0.38625 | -0.224   | -0.15641 | 0.01706  | 0.13652  | 0.21151  | 0.20191  | 0.46581  | 0.4464   | 0.325    | 0.43128  | 0.38739  | -0.15414 | 0        | -0.59639 | -0.65289 | -0.65347 |
| PFD0680c      | -0.59339 | -0.29223 | -0.34406 | -0.20989 | -0.26077 | -0.43573 | -0.31024 | -0.42034 | -0.41139 | -0.26579 | -0.14301 | -0.06836 | 0.12052  | 0.17422  | 0.44746  | 0.41805  | 0.39883  | 0.30074  | 0.137    | -0.04452 | -0.14718 | -0.50449 | -0.69565 | -0.68786 |
| PFC10 API0040 | -0.52337 | -1.10337 | -1.31889 | -1.42938 | -0.68169 | -0.9001  | -1.33954 | -0.23051 | -1.33026 | -0.76413 | -0.60062 | -0.66364 | -0.76051 | 0.01981  | 0.19769  | 0.47395  | 0.89334  | 0.49084  | -0.28818 | 0.09967  | -0.10009 | 0.63102  | -0.34619 | -0.35747 |
| MAL13P1.204   | 0.4606   | 0.73698  | 1.04706  | 1.02152  | 0.90652  | 1.1951   | 0.97855  | 1.09202  | 1.1839   | 0.97965  | 0.82486  | 0.66323  | 0.43304  | 0.2199   | 0.15693  | 0.06321  | -0.14285 | -0.06615 | 0.09959  | -0.13071 | -0.52005 | -0.00089 | -0.46724 | 0.3272   |
| PF0775w       | -0.1534  | -0.0711  | 0.02016  | -0.12798 | 0.19266  | 0.71885  | 0.84739  | 0.95629  | 0.72881  | 0.79592  | 0.80683  | 0.64601  | 0.41634  | 0.24383  | 0.23837  | 0.0882   | 0.02043  | 0.10018  | 0.23051  | 0.07525  | -0.05457 | 0.0719   | 0.41302  | 0.32134  |
| PF10 0160     | -1.18384 | -0.72842 | -1.02548 | -0.51617 | -0.29819 | -0.26616 | -0.14088 | -0.01333 | -0.27609 | 0.11568  | 0.61451  | 0.47825  | 0.70938  | 0.37967  | 0.63649  | 0.29911  | 0.09575  | -0.50457 | -0.59811 | -1.54472 | -1.362   | -1.19784 | -1.49799 | -1.1949  |
| PFD0420c      | -0.75024 | -0.79675 | -2.04813 | -1.29785 | -1.44252 | -1.56953 | -1.51575 | -1.37252 | -1.19668 | -0.57965 | -0.39339 | -0.11923 | 0.3816   | 0.44925  | 0.88619  | 0.95819  | 0.78213  | 0.55638  | 0.72173  | 0.23173  | -0.04326 | -0.42882 | -0.62399 | -0.75615 |
| PFL2205w      | 0.65789  | 0.84935  | 1.14866  | 1.49378  | 1.58745  | 1.30493  | 1.03329  | 1.11507  | 0.66579  | 0.47808  | 0.55147  | 0.41137  | 0.22168  | 0.11463  | -0.10651 | -0.17338 | -0.29208 | -0.21924 | -0.24196 | -0.13515 | -0.08356 | -0.17517 | 0.20658  | 0.65076  |
| MAL13P1.292   | 0.67418  | 0.88173  | -0.3168  | 1.10522  | 0.86419  | 0.96943  | 1.04717  | 0.82503  | 0.93173  | 0.73775  | 0.65554  | 0.52462  | 0.18357  | 0.00706  | -0.14252 | -0.25081 | -0.23976 | -0.50557 | 0.25079  | -0.27187 | -0.04733 | -0.04003 | 0.21439  | 0.45814  |
| PF10 0365     | 0.37981  | -0.11054 | 0.46503  | 0.20145  | 0.18909  | -0.04626 | 0.12854  | -0.03744 | -0.01061 | -0.01219 | 0.06409  | 0.19457  | 0.28039  | 0.13126  | 0.02909  | -0.01418 | -0.04764 | 0.15268  | 0.5243   | 0.40439  | 0.43468  | 0.43664  | 0.4511   | 0.63043  |
| MAL13P1.126   | 0.00812  | -0.38238 | -0.46059 | -0.59175 | -0.75869 | -0.8141  | -0.10941 | -1.21344 | -1.61319 | -1.69309 | -1.29686 | -1.17253 | -0.8011  | -0.43831 | 0.30161  | 0.78302  | 0.59478  | 0.63     | 1.18134  | 0.74753  | 0.78731  | 0.46912  | 0.262    | -0.06713 |
| PF1685w       | -0.62459 | -1.10103 | -1.23144 | -2.04148 | -2.22824 | -2.59935 | -2.8063  | -3.07389 | -3.51606 | -3.98317 | -3.98909 | -4.00907 | -3.72465 | -2.61208 | -0.69168 | 0.28839  | 0.76819  | 0.71053  | 1.4806   | 1.19442  | 0.9484   | 0.2034   | 0.44006  | 0.18318  |
| MAL13P1.35    | 0.47576  | 0.67532  | 0.52537  | 0.65387  | 0.55325  | 0.60499  | 0.55922  | 0.42674  | 0.35914  | 0.26594  | 0.25622  | 0.17906  | -0.00822 | 0.02155  | -0.07568 | -0.03188 | -0.12637 | -0.15126 | 0.28162  | 0.15083  | 0.0888   | 0.22517  | 0.34717  | 0.52714  |
| PF0620c       | 0.3357   | 0.64055  | 0.74397  | 1.0224   | 1.31662  | 1.20394  | 1.04485  | 1.21795  | 0.97096  | 0.70573  | 0.58625  | 0.56568  | 0.40349  | 0.25129  | 0.05612  | -0.01427 | 0.02138  | -0.13128 | 0.03569  | -0.12346 | -0.23961 | -0.04366 | 0.16777  | 0.44489  |
| PF11 0129     | -0.09227 | -0.12601 | -0.26436 | -0.38671 | -0.36991 | -0.3755  | -0.03081 | 0.37542  | 0.73785  | 0.71376  | 0.84495  | 0.79816  | 0.59518  | 0.40524  | 0.38608  | 0.33656  | -0.01701 | 0.40331  | 0.26765  | 0.22101  | 0.04606  | -0.00415 | -0.05821 | -0.05378 |
| PF14 0361     | -0.49426 | -0.54443 | -0.12363 | -0.58401 | -0.46413 | -0.37159 | -0.4861  | -0.72013 | -1.12912 | -0.89309 | -0.57372 | -0.51346 | -0.09539 | 0.05242  | 0.54321  | 0.7173   | 0.98778  | 0.23337  | 0.67761  | 0.06433  | -0.10907 | -0.32651 | -0.51913 | -0.75396 |
| MAL8P1.161    | -0.58715 | -0.76198 | -0.41795 | -0.93351 | 0.01539  | 1.3217   | 2.14945  | 2.55967  | 2.60661  | 1.73358  | 1.36204  | 0.7584   | 0.1494   | -0.56049 | -0.89399 | -1.23502 | -0.35939 | -1.08739 | 0.6755   | -0.12448 | -0.26126 | -0.56023 | -0.1424  | 1.04818  |
| PF13 0034     | -0.17497 | 0.05028  | -0.03959 | 0.44359  | 0.54174  | 0.53233  | 0.54349  | 0.5886   | 0.47587  | 0.51858  | 0.6014   | 0.57212  | 0.54346  | 0.41023  | 0.47391  | 0.39416  | 0.33584  | 0.15998  | 0.15417  | -0.04064 | -0.25499 | -0.31703 | -0.33301 | -0.26339 |
| PF13 0036     | -0.18608 | 0.14257  | 0.07212  | -0.21987 | 0.05911  | 0.12868  | 0.20236  | 0.18595  | -0.1978  | 0.18088  | 0.14697  | 0.28446  | 0.48923  | 0.35515  | 0.55602  | 0.49596  | 0.06328  | 0.19777  | 0.23196  | -0.24967 | -0.34772 | -0.20176 | -0.26618 | -0.18038 |
| MAL13P1.38    | 0.15463  | -0.22571 | -0.58716 | -0.63028 | -1.32764 | -1.59143 | -1.41087 | -1.6624  | -2.12179 | -2.27666 | -2.21875 | -2.1735  | -1.9036  | -1.54358 | -0.48204 | 0.27294  | 0.75225  | 0.62695  | 1.22188  | 0.85756  | 1.15406  | 0.75344  | 0.60334  | 0.18965  |
| MAL13P1.193   | -0.15674 | -0.11323 | -0.10587 | -0.11918 | -0.10205 | -0.23324 | -0.28285 | -0.02532 | 0.03536  | 0.19129  | 0.1026   | 0.34974  | 0.33595  | 0.36147  | 0.34635  | 0.17699  | 0.10047  | 0.16808  | 0.17738  | -0.12814 | -0.18773 | 0.4033   | -0.17571 | -0.03993 |
| PFL0490c      | -0.59061 | -0.75629 | -0.76128 | -0.63819 | -0.67122 | -0.22546 | 0.25733  | 1.07103  | 1.2048   | 1.13957  | 1.17858  | 1.10773  | 0.7397   | 0.61618  | 0.45787  | 0.3124   | -0.05269 | 0.08731  | 0.00804  | -0.25432 | -0.27356 | -0.24662 | -0.29124 | -0.42074 |
| PF0700c       | -1.21257 | -0.28056 | 0.14911  | 0.22539  | 0.32663  | 0.68977  | 1.1025   | 0.77625  | 1.16486  | 0.94533  | 0.78701  | 0.8552   | 0.67883  | 0.39903  | 0.09292  | -0.08654 | -0.47051 | -0.6082  | -1.07214 | -1.89325 | -1.97669 | -1.55878 | -1.29163 | -1.26995 |
| PF14 0234     | 0.48959  | 0.13977  | -0.0239  | -0.71442 | -0.7389  | -0.89988 | -0.92487 | -0.88881 | -0.79282 | -0.79587 | -0.93786 | -1.18979 | -1.17945 | -1.28757 | -1.22882 | -0.93863 | -0.20957 | 0.18769  | 0.97951  | 0.83701  | 0.86353  | 1.01575  | 0.9919   | 0.81805  |
| PF11 0294     | 0.25681  | 0.45895  | 0.34765  | 0.50052  | 0.83942  | 0.92948  | 1.05611  | 1.07726  | 0.95092  | 0.73431  | 0.63804  | 0.47743  | 0.43761  | 0.20365  | 0.17701  | 0.06334  | -0.02491 | -0.09955 | 0.01767  | -0.06842 | 0.03879  | 0.11269  | 0.16017  | 0.26995  |
| MAL8P1.86     | -1.45692 | -1.34444 | -1.45716 | -1.42824 | -0.81362 | -0.52443 | -0.12997 | 0.36831  | 0.66078  | 1.12668  | 1.16218  | 1.37138  | 1.11127  | 0.98884  | 0.41059  | 0.16712  | -0.15996 | -0.285   | -0.70674 | -0.73668 | -0.17628 | -1.07504 | -1.17235 | -0.95645 |
| PF11 0364     | -1.00961 | -0.4737  | -0.36504 | -0.15922 | 0.00781  | -0.32622 | -0.36906 | -0.23077 | -0.13686 | 0.14443  | 0.4219   | 0.50358  | 0.5116   | 0.33676  | 0.47404  | 0.3737   | 0.18009  | -0.1814  | -0.27121 | -0.66952 | -0.95051 | -1.0353  | -1.26583 | -1.08275 |
| PFB0850c      | -0.87648 | -0.81494 | -0.44619 | -0.38915 | -0.1586  | 0.1065   | 0.2925   | 0.33046  | 0.32546  | 0.38659  | 0.45199  | 0.23684  | 0.45561  | 0.37409  | 0.35966  | 0.18381  | 0.55177  | -0.339   | -0.00652 | -0.11809 | 0.0108   | -0.31226 | -0.29963 | -0.15613 |
| PFD0260c      | -0.16673 | 0.06573  | -0.43901 | 0.18226  | 0.254    | 0.46341  | 0.09269  | 0.15955  | 0.21381  | 0.22514  | 0.0037   | 0.08317  | 0.0523   | 0.18224  | 0.13631  | 0.44772  | 0.31907  | 0.16172  | -0.06279 | 0.01798  | 0.16358  | 0.22936  | 0.08902  | 0.11021  |
| PF14 0539     | -0.23714 | -0.18244 | 0.3141   | -0.15041 | -0.30355 | -0.23945 | -0.44281 | -0.35456 | -0.12891 | 0.54607  | 0.75054  | 0.90222  | 0.69733  | 0.65778  | 0.5784   | 0.50213  | -0.07248 | 0.09125  | 0.13478  | -0.12399 | -0.23871 | -0.36264 | -0.27384 | -0.21972 |
| PFL0575w      | -0.33511 | -0.2064  | 0.03919  | -0.01772 | -0.0494  | 0.25307  | 0.46228  | 0.28969  | 0.61882  | 0.69672  | 0.45392  | 0.49089  | 0.60313  | 0.81466  | 0.44292  | 0.19568  | 0.24865  | 0.01714  | -0.72088 | -0.2468  | -0.38606 | -0.2198  | -0.29504 | -0.34736 |
| MAL8P1.36     | -0.50869 | -0.07155 | 0.09665  | 0.27318  | 0.60159  | 0.99313  | 1.06524  | 1.46779  | 1.02886  | 0.93293  | 0.94066  | 0.92023  | 0.48185  | -0.05621 | -0.13548 | -0.46512 | -0.93341 | -0.42819 | -0.47991 | -0.85668 |          |          |          |          |

|                 |          |          |          |          |          |          |          |          |          |          |          |          |          |          |          |          |          |          |          |          |          |          |          |          |
|-----------------|----------|----------|----------|----------|----------|----------|----------|----------|----------|----------|----------|----------|----------|----------|----------|----------|----------|----------|----------|----------|----------|----------|----------|----------|
| PF14_0671       | -0.21679 | 0.0167   | -0.10728 | 0.17618  | 0.24221  | 0.21053  | 0.32644  | 0.16668  | 0.16463  | 0.09397  | 0.16661  | 0.24564  | 0.41804  | 0.27788  | 0.55778  | 0.42722  | 0.55009  | 0.03118  | 0.3058   | 0.09326  | 0.07525  | 0.14086  | 0.24736  | 0.33758  |
| PF08_0110       | -0.32455 | -0.2125  | -0.57033 | 0.12043  | 0.05161  | 0.28965  | 0.14592  | 0.32963  | 0.49426  | 0.33558  | 0.39376  | 0.62304  | 0.48416  | 0.23439  | 0.30683  | 0.31141  | 0.35109  | -0.24305 | 0.69881  | -0.07985 | -0.22325 | 0.06297  | 0.1296   | -0.00646 |
| PFL2310w        | 0.88326  | 0.75645  | 0.57309  | 1.04286  | 1.01199  | 0.92901  | 0.90436  | 0.92971  | 0.66833  | 0.49953  | 0.46935  | 0.2878   | 0.19086  | 0.0388   | -0.09551 | -0.13815 | -0.27727 | -0.23683 | 0.22151  | -0.00738 | 0.15661  | 0.30001  | 0.43455  | 0.72966  |
| PFF1595c        | 0.80931  | 0.57554  | 1.41802  | 0.74385  | 0.2038   | -0.03205 | -0.11167 | 0.18517  | 0.52474  | -0.03307 | 0.02697  | -0.22046 | 0.01939  | -0.05983 | -0.20097 | -0.46809 | -0.43767 | -0.38477 | 0.14818  | 0.06159  | 0.12486  | 0.0157   | 0.14039  | 0.03018  |
| PFE0150c        | -0.99193 | -0.98783 | -0.6797  | -0.56833 | -0.20414 | 0.22985  | 0.64085  | 0.72755  | 0.70016  | 0.59269  | 0.74622  | 0.81654  | 0.7663   | 0.80399  | 0.81352  | 0.7409   | 0.29783  | 0.37133  | 0.29749  | -0.18283 | -0.50443 | -0.90622 | -1.12969 | -1.15632 |
| PF11_0457       | -0.54717 | -0.06049 | -3.58235 | 0.13416  | -0.09104 | 0.33928  | 0.30996  | 0.39511  | 0.54735  | 0.66579  | 0.90509  | 1.00512  | 1.04749  | 0.49652  | 0.53623  | 0.23329  | -0.05672 | -0.29018 | -0.22614 | -0.92092 | -1.26306 | -0.64544 | -0.75307 | -0.39397 |
| PF10_0294       | 0.20973  | 0.32064  | 0.41388  | 0.35068  | 0.40402  | 0.48329  | 0.46657  | 0.30823  | 0.56971  | 0.67753  | 0.70337  | 0.72449  | 0.64774  | 0.50683  | 0.24573  | 0.08994  | -0.17216 | -0.2669  | -0.42306 | -0.39886 | -0.29732 | -0.06773 | -0.03867 | 0.0258   |
| MAL13P1.70      | 0.70024  | 0.811    | 0.75191  | 0.71805  | 0.55619  | 0.56911  | 0.53519  | 0.2627   | 0.22665  | 0.12868  | -0.03655 | -0.05908 | -0.24027 | -0.27018 | -0.58266 | -0.73761 | -0.26473 | -0.58876 | 0.13242  | 0.07791  | 0.33285  | 0.60646  | 0.6829   | 0.78614  |
| PFL0750w        | 0.51389  | 0.54554  | -0.20078 | 0.26065  | -0.05574 | 0.02672  | -0.02358 | 0.04272  | -0.00465 | -0.07476 | 0.09604  | 0.32504  | 0.04761  | -0.04458 | 0.03188  | 0.46005  | 0.13889  | 1.0225   | 1.17538  | 1.11876  | 0.79506  | 0.56115  | 0.71417  | 0.42147  |
| PFC0670c        | -1.44473 | -1.61478 | -2.00331 | -1.82425 | -1.82042 | -1.78218 | -1.42608 | -1.01421 | -0.88197 | -0.50683 | -0.00166 | 0.29995  | 0.56515  | 0.74585  | 1.08631  | 0.85379  | 0.25355  | 0.48665  | 0.13033  | -0.28548 | -0.6695  | -1.07288 | -1.31951 | -1.41629 |
| PF14_0092       | 0.12191  | -0.80913 | -1.08284 | -1.66292 | -2.10533 | -2.35856 | -2.62429 | -2.57766 | -2.86731 | -2.64024 | -2.11883 | -2.02861 | -1.73087 | -1.58773 | -0.85704 | 0.04036  | 0.83316  | 0.85752  | 1.35721  | 1.14715  | 0.87236  | 0.74558  | 0.6484   | 1.04575  |
| PFB0555c        | 0.17268  | 0.21657  | 0.40814  | 0.21801  | 0.16432  | 0.20989  | 0.26166  | 0.10886  | 0.31614  | 0.40227  | 0.34964  | 0.38338  | 0.50929  | 0.66526  | 0.42874  | 0.20211  | 0.19668  | -0.03359 | -0.49442 | -0.21196 | -0.17642 | -0.18287 | -0.18252 | -0.02427 |
| MAL7P1.38       | -1.21572 | -0.71624 | -0.31003 | -0.35926 | -0.19151 | 0.01563  | 0.18069  | 0.58737  | 0.66152  | 0.61981  | 0.71388  | 0.63204  | 0.69686  | 0.48264  | 0.50362  | 0.1905   | -0.08327 | -0.11996 | -0.553   | -0.69179 | -0.98498 | -0.9833  | -0.91778 | -0.73355 |
| PF11_0488       | -0.6883  | -0.84186 | -0.72104 | -0.74549 | -0.92223 | -0.96305 | -0.94062 | -0.98913 | -0.72121 | -0.31314 | -0.00376 | 0.3232   | 0.70011  | 0.8975   | 0.88425  | 0.6089   | -0.69924 | 0.45171  | -0.30369 | -0.17556 | -0.31096 | -0.36725 | -0.06657 | -0.69023 |
| PF14_0470       | -0.31004 | -0.55988 | -0.4157  | -0.77822 | -0.83382 | -0.95124 | -0.86974 | -0.86829 | -0.37092 | -0.06109 | 0.12281  | 0.08251  | 0.25844  | 0.46262  | 0.47132  | 0.48457  | 0.76068  | 0.5038   | 0.28885  | 0.41439  | 0.30799  | -0.00453 | -0.23104 | -0.41195 |
| PF10_0025       | 1.5126   | 1.82071  | 1.7331   | 1.91557  | 1.51658  | 1.37651  | 0.75616  | 0.38486  | -0.24133 | -1.04296 | -1.32797 | -1.80142 | -2.01573 | -2.36762 | -2.21224 | -2.22074 | -2.01947 | -2.16055 | -1.27932 | -0.30439 | 0.26771  | 0.69536  | 1.04917  | 1.21435  |
| PFC10_API0047:t |          |          |          |          |          |          |          |          |          |          |          |          |          |          |          |          |          |          |          |          |          |          |          |          |
| RNA             | 0.74381  | 1.34322  | 0.52521  | 0.30678  | 0.05362  | 0.5683   | -0.02208 | 0.4581   | 0.45745  | 0.02698  | -0.09808 | 0.02536  | -0.32076 | -0.24449 | -0.02417 | 0.23539  | -0.10077 | 0.56906  | 1.00926  | 0.2997   | 0.70968  | 1.09836  | 0.51617  | 0.23263  |
| PFF0630c        | -1.76636 | -1.66722 | -1.74395 | -2.09971 | -1.98291 | -2.02471 | -2.19032 | -1.42808 | -0.81814 | -0.04139 | 0.80513  | 1.03042  | 1.11748  | 0.89011  | 0.87321  | 0.54016  | 0.04827  | -0.39417 | -0.34186 | -0.96901 | -1.15864 | -1.44614 | -1.56175 | -1.55306 |
| PF10_0039       | 0.9576   | -0.30271 | -0.97136 | -1.10906 | -1.41187 | -1.88888 | -2.25179 | -2.61248 | -3.1713  | -3.50823 | -3.54681 | -3.71506 | -4.15366 | -4.36313 | -3.81796 | -2.56986 | -0.418   | -0.82986 | 1.27018  | 1.50224  | 1.37778  | 1.10593  | 1.58351  | 1.51595  |
| PF14_0548       | 0.25008  | -0.28574 | -0.38361 | -0.39631 | -0.61032 | -0.596   | -0.70642 | -0.62085 | -0.44387 | -0.38731 | -0.2769  | -0.15053 | -0.1531  | -0.26879 | -0.08144 | 0.28724  | 0.4902   | 0.51831  | 1.29293  | 0.80872  | 0.7853   | 0.6039   | 0.66457  | 0.29241  |
| PF13_0252       | -1.45423 | -1.03239 | -0.70804 | -0.63523 | -0.43302 | -0.39662 | 0.23907  | 0.6369   | 1.51338  | 1.12146  | 1.4028   | 1.46669  | 1.0066   | 0.67047  | 0.24567  | -0.17565 | -0.41297 | -0.97919 | -1.59837 | -2.47789 | -2.42402 | -2.04571 | -2.20221 | -1.64821 |
| PF13_0116       | 0.30181  | 0.5981   | 0.55452  | 0.53856  | 0.86901  | 0.70978  | 0.4985   | 0.24498  | -0.2207  | -0.66035 | -0.92111 | -1.01689 | -0.85601 | -0.58796 | -0.67166 | -0.61342 | -0.39015 | -0.64803 | -0.20266 | -0.31188 | -0.1583  | -0.02053 | 0.1047   | 0.16467  |
| PF11_0162       | -0.11517 | -0.10236 | -0.26369 | -0.06474 | -0.00959 | -0.17524 | -0.28581 | -0.37514 | -0.5168  | -0.62622 | -0.49249 | -0.33889 | -0.12336 | 0.11787  | 0.45363  | 0.43598  | 0.2864   | 0.16203  | 0.07697  | 0.00399  | -0.09827 | -0.41513 | -0.24622 | -0.08083 |
| PF13_0345       | -0.85922 | -0.44081 | -0.47467 | -0.36803 | -0.32856 | -0.20841 | -0.04261 | 0.29222  | 0.38228  | 0.5881   | 0.92948  | 0.82105  | 0.86416  | 0.59352  | 0.51436  | 0.28278  | -0.05327 | -0.17812 | -0.34585 | -0.57423 | -0.73934 | -0.67084 | -0.62532 | -0.47112 |
| PFD0090c        | -3.26209 | -3.43794 | -3.08178 | -3.65198 | -2.99028 | -1.8857  | -0.09935 | 0.62092  | 1.84442  | 2.48778  | 1.25417  | 1.33832  | 0.93233  | 0.65855  | -0.08906 | -0.73844 | -1.1453  | -1.64308 | -2.68652 | -2.75731 | -2.77167 | -3.09459 | -3.33176 | -3.5542  |
| PF10_0172       | 0.57724  | 0.73015  | 0.72581  | 0.7569   | 0.71398  | 0.54401  | 0.62724  | 0.69318  | 0.70391  | 0.36431  | 0.32581  | 0.38562  | 0.23517  | 0.3551   | 0.32212  | 0.35382  | 0.43536  | 0.51611  | 0.44763  | 0.68982  | 0.71817  | 0.32433  | 0.52937  | 0.51672  |
| MAL8P1.111      | 0.63134  | 0.7679   | 0.66668  | 0.66088  | 0.78192  | 0.23932  | 0.09274  | -0.18379 | -0.40549 | -0.36177 | -0.23706 | -0.2503  | 0.0504   | 0.30052  | 0.30261  | 0.32159  | 0.37028  | 0.2752   | -0.0111  | 0.06986  | 0.13321  | 0.29728  | 0.32468  | 0.4256   |
| PF13_0182       | -0.30078 | -0.845   | -1.35046 | -0.54804 | -0.37599 | -0.17719 | 0.13489  | 0.25649  | 0.38916  | 0.42137  | 0.31477  | 0.27605  | 0.30781  | 0.56427  | 0.4545   | 0.4067   | 0.36668  | 0.35311  | 0.14229  | 0.17608  | 0.00776  | -0.22259 | -0.2602  | -0.18917 |
| MAL13P1.248     | 0.57524  | 0.38184  | 0.11312  | 0.2997   | 0.29992  | 0.20912  | 0.03874  | -0.1837  | -0.68043 | -0.81967 | -0.46826 | -0.39188 | -0.21381 | -0.09783 | 0.32375  | 0.65565  | 0.9559   | 0.76901  | 1.61139  | 1.04088  | 1.08225  | 0.63811  | 0.53828  | 0.15409  |
| PFI0550w        | -0.08102 | 0.15351  | 0.44368  | 0.10789  | 0.19143  | 0.25796  | 0.29455  | 0.49477  | 0.65417  | 0.80455  | 0.59149  | 0.85599  | 0.72533  | 0.44708  | 0.41453  | 0.19934  | -0.12475 | 0.08065  | 0.01864  | -0.28445 | -0.31013 | -0.2451  | -0.25555 | -0.07494 |
| PF14_0320       | -0.06782 | -0.28553 | -0.29204 | -0.45879 | -0.40117 | -0.49866 | -0.42342 | -0.47235 | -0.27769 | -0.11487 | -0.06799 | 0.12094  | 0.15476  | 0.37964  | 0.27271  | 0.34319  | 0.44198  | 0.32869  | 0.06022  | 0.18857  | 0.09652  | 0.02659  | -0.15629 | -0.25855 |
| PF10_0343       | 0.10783  | -0.73787 | -1.45769 | -1.49415 | -0.61586 | -1.2375  | -1.3105  | -1.41342 | -3.54074 | -0.79796 | -1.62992 | -1.45139 | -3.02164 | -1.10551 | -1.61975 | -0.07114 | 0.37268  | 0.61332  | 0.102975 | 1.37854  | 1.33994  | 1.8636   | 0.57373  | -0.05674 |
| PFI1255w        | -0.11854 | 0.11164  | -0.0382  | 0.0654   | 0.1077   | -0.00913 | -0.08867 | -0.20457 | -0.53401 | -0.63472 | -0.42722 | -0.46028 | -0.21207 | -0.12721 | 0.34877  | 0.49051  | 0.52546  | 0.52724  | 1.03141  | 0.50886  | 0.41632  | -0.16543 | 0.03733  | 0.11595  |
| MAL8P1.140      | -0.42026 | -0.55999 | -0.79569 | -0.65471 | -0.65929 | -0.83578 | -0.8156  | -0.61852 | -0.10848 | 0.01909  | -0.00649 | 0.31177  | 0.38816  | 0.80339  | 0.81621  | 0.91452  | 0.44529  | 0.73489  | 0.73221  | 0.4526   | 0.22155  | -0.1833  | -0.33222 | -0.55186 |
| PFD1060w        | -0.00076 | 0.20698  | 0.24003  | 0.92264  | 0.24288  | 0.3036   | 0.3274   | 0.2099   | 0.51015  | 0.56466  | 0.57133  | 0.5476   | 0.50097  | 0.49584  | 0.18376  | -0.10407 | -0.17686 | -0.30689 | -0.74531 | -0.68789 | -0.53588 | -0.37405 | -0.35374 | -0.2746  |
| PFB0580w        | 0.02475  | 0.0884   | 0.17473  | 0.20381  | 0.14419  | 0.18682  | 0.38896  | 0.43032  | 0.36436  | 0.45233  | 0.48182  | 0.54347  | 0.54389  | 0.42394  | 0.48679  | 0.42419  | 0.33914  | 0.21649  | 0.32703  | -0.03639 | -0.10206 | 0.25363  | 0.04004  | 0.04049  |
| PFE0235c        | -0.89247 | -0.92569 | -1.01698 | -1.37151 | -1.41007 | -1.52408 | -1.4764  | -1.61233 | -1.53551 | -1.12477 | -0.86756 | -0.48901 | 0.12878  | 0.68748  | 0.91704  | 0.843    | 0.87829  | 0.7167   | -0.07419 | 0.20326  | 0.05325  | -0.23522 | -0.66369 | -1.005   |
| PFI0850w        | 0.59363  | 0.28875  | 0.02925  | -0.07447 | -0.14255 | -0.39295 | -0.59276 | -0.70521 | -0.89886 | -0.86387 | -0.71717 | -0.67623 | -0.71896 | -0.63954 | -0.28207 | 0.10179  | 0.47732  | 0.93555  | 0.91905  | 1.0288   | 1.06197  | 0.75664  | 0.73152  | 0.39327  |
| PFI1445w        | -0.73356 | -1.66536 | -1.76141 | -2.2156  | -2.50134 | -2.80283 | -3.07896 | -3.41102 | -3.90695 | -4.05065 | -3.98403 | -3.90665 | -2.90305 | -1.37356 | -0.34661 | 0.7777   | 0.62653  | 1.04503  | 1.01108  | 1.24998  | 0.82903  | 0.61378  | 0.15197  | -0.65536 |
| PFL2665c        | -0.09147 | 0.6029   | 0.25972  | 0.52646  | 2.4726   | 1.7458   | 1.22609  | 0.92727  | 1.30617  | 1.17533  | 0.26826  | -0.03067 | -0.42084 | -0.34527 | -2.37873 | -0.50663 | -2.80329 | -2.04568 | -2.90004 | -1.06307 | -0.77976 | -0.74798 | -0.51428 | -0.18682 |
| PFE0895c        | 0.065    | -0.77218 | -1.28322 | -0.60838 | -0.68494 | -0.75902 | -0.84611 | -0.98011 | -1.38588 | -1.48462 | -        |          |          |          |          |          |          |          |          |          |          |          |          |          |

|             |          |          |          |          |          |          |          |          |          |           |          |          |          |          |          |          |          |          |          |          |          |          |          |          |
|-------------|----------|----------|----------|----------|----------|----------|----------|----------|----------|-----------|----------|----------|----------|----------|----------|----------|----------|----------|----------|----------|----------|----------|----------|----------|
| MAL7P1.153  | -0.19304 | -0.54476 | -0.53488 | -0.52161 | -0.68917 | -0.58306 | -0.66692 | -0.62374 | -0.43778 | 0.00144   | 0.28207  | 0.45196  | 0.44393  | 0.57043  | 0.61054  | 0.68343  | 0.86577  | 0.51023  | 0.51039  | 0.28679  | -0.02921 | -0.14037 | -0.25468 | -0.26785 |
| PF05081w    | -0.36058 | -0.25403 | -0.61267 | -1.00597 | -1.00437 | -1.05136 | -0.90121 | -1.05703 | -0.95667 | -1.04993  | -0.80937 | -0.69981 | -0.42651 | 0.05489  | 0.49853  | 0.92412  | 0.57528  | 0.76727  | 0.63448  | 0.36543  | 0.37147  | 0.08077  | -0.20364 | -0.26784 |
| PFA0460c    | -0.62195 | -0.68223 | -0.62427 | -0.52116 | -0.37833 | -0.57775 | -0.64113 | -0.49967 | -0.05845 | 0.18607   | 0.71129  | 0.77775  | 0.683    | 0.35246  | 0.39201  | 0.2386   | -0.17113 | -0.16003 | 0.03167  | -0.26658 | -0.16589 | -0.049   | -0.04801 | 0.11905  |
| PF13 0188   | 0.03243  | -0.03937 | 0.07262  | -0.16078 | -0.15635 | -0.27108 | -0.32345 | -0.55279 | -0.69884 | -0.24734  | -0.00168 | 0.16016  | 0.30937  | 0.4043   | 0.56836  | 0.58526  | 0.6022   | 0.63319  | 0.47724  | 0.66896  | 0.44946  | 0.33557  | 0.29247  | 0.26487  |
| PFL2455w    | 0.15805  | 0.55728  | 1.19062  | 0.79097  | 0.65123  | 0.87386  | 0.57269  | 0.83362  | 0.55866  | 0.15225   | 0.15577  | -0.13469 | 0.16474  | -0.12807 | 0.25253  | 0.07611  | -0.00749 | -0.11894 | 0.19504  | -0.07578 | -0.18972 | 0.22702  | 0.21642  | 0.27908  |
| PFD0311w    | -0.47225 | -0.17444 | -0.1109  | -0.20874 | -0.0969  | 0.06545  | 0.10572  | 0.20935  | -0.19592 | -0.2581   | 0.12322  | 0.23964  | -0.04248 | -0.11741 | -0.06194 | -0.13026 | -0.16092 | -0.02172 | 0.1738   | -0.45071 | -0.55088 | -0.52078 | -0.53083 | -0.62789 |
| PF10 0322   | 0.57982  | 0.34165  | -0.14939 | -0.2104  | 0.37495  | 0.33941  | 0.71079  | 0.88203  | 0.87486  | 0.30569   | 0.20721  | 0.04485  | -0.04619 | -0.48996 | -0.17562 | -0.09711 | -0.19481 | -0.08352 | 0.30874  | -0.1008  | 0.17835  | 0.37458  | 0.12516  | 0.23078  |
| PF11 0159   | -0.82371 | -0.77338 | -0.93959 | -1.11534 | -1.06863 | -1.15951 | -1.05317 | -0.34244 | -0.12343 | 0.23734   | 0.74494  | 0.81783  | 0.75036  | 0.52422  | 0.61402  | 0.62193  | 0.42977  | 0.22112  | 0.32944  | -0.21892 | -0.29451 | -0.62854 | -0.69909 | -0.75206 |
| MAL13P1.233 | -0.24779 | 0.22878  | 0.37995  | 0.40265  | 0.73247  | 0.34318  | 0.14841  | -0.18178 | -0.43646 | -0.14105  | -0.07188 | -0.09467 | -0.06201 | -0.119   | -0.15689 | -0.36874 | -0.57039 | -1.30798 | -1.57968 | -1.72567 | -1.28131 | -0.83324 | -0.71549 | -0.40104 |
| PF14 0213   | 0.40714  | 0.07763  | -0.42554 | -0.32998 | -0.60905 | -0.79486 | -0.58013 | -0.54894 | -1.0073  | -1.17316  | -1.14149 | -1.58087 | -1.48736 | -1.13597 | -0.73687 | 0.18663  | 0.53638  | 1.01676  | 0.88254  | 1.06879  | 0.84461  | 0.77529  | 0.63573  | 0.21303  |
| PFI0405w    | -0.77483 | -0.97516 | -1.16346 | -1.33784 | -1.4934  | -1.9005  | -1.94346 | -1.95657 | -2.12432 | -1.80652  | -1.32484 | -0.86907 | -0.3747  | 0.00883  | 0.50555  | 0.67741  | 0.67696  | 0.38197  | 1.00784  | 0.43962  | 0.18463  | -0.29681 | -0.43527 | -0.54713 |
| PF08 0085   | -0.32949 | -0.26252 | -0.20712 | -0.28698 | -0.15586 | -0.27786 | -0.28323 | -0.41559 | -0.35975 | -0.43323  | 0.04613  | 0.05476  | 0.24213  | 0.19262  | 0.29276  | 0.2948   | 0.07234  | 0.01171  | 0.0434   | -0.31773 | -0.43117 | -0.16556 | -0.13349 | 0.01592  |
| PFE0710w    | -0.21377 | 0.03049  | 0.19632  | 0.62357  | 0.78753  | 0.50005  | 0.40861  | 0.29903  | 0.10928  | -7.93E-05 | 0.04128  | 0.22003  | 0.17779  | 0.36856  | 0.40954  | 0.43489  | 0.42633  | 0.37019  | 0.59592  | 0.35086  | 0.06664  | -0.10508 | -0.09294 | -0.07776 |
| PF11 0471   | 0.41516  | 0.16274  | 0.04185  | -0.28382 | 0.12488  | -0.07266 | -0.71462 | 0.25948  | -0.19902 | -1.33325  | -0.43175 | -1.42273 | -1.03503 | -0.54702 | -0.71853 | -0.24983 | 0.15293  | -0.33002 | 0.34623  | 0.01451  | 0.0542   | 0.82771  | 0.73485  | 0.31771  |
| PF11 0248   | -0.74591 | -0.48461 | -0.84539 | -0.63479 | -0.86603 | -0.6607  | -0.80613 | -0.5155  | -0.15232 | 0.07515   | 0.73644  | 0.79238  | 0.94557  | 0.71264  | 0.73478  | 0.51324  | 0.38368  | 0.22595  | 0.14365  | -0.19676 | -0.15645 | -0.42513 | -0.36092 | -0.31281 |
| PFL0680c    | -0.38501 | -0.66438 | -0.43591 | -0.52232 | -0.8327  | -0.82914 | -1.06891 | -1.05573 | -0.7111  | -0.04009  | 0.25103  | 0.48521  | 0.65939  | 0.52711  | 0.55188  | 0.63725  | 0.30176  | 0.47974  | 0.63551  | 0.16385  | -0.09904 | -0.18206 | -0.17796 | -0.14753 |
| PFD0840w    | -0.05065 | 0.06604  | 0.45049  | 0.15549  | 0.3069   | 0.39591  | 0.51443  | 0.07127  | 0.35313  | 0.32889   | -0.04754 | -0.08766 | 0.08129  | 0.46754  | 0.14698  | 0.06741  | 0.20833  | 0.19507  | -0.63805 | -0.07964 | -0.15267 | -0.16611 | -0.27096 | -0.18865 |
| PFD0692c    | -0.34476 | -0.42703 | -0.87963 | -0.88367 | -1.27597 | -1.60102 | -1.45463 | -1.46113 | -1.87672 | -1.78159  | -1.20356 | -0.76729 | -0.0939  | 0.11039  | 0.80682  | 0.92582  | 0.70561  | 1.08182  | 1.02193  | 0.51655  | 0.05075  | -0.22241 | -0.5642  | -0.69805 |
| MAL8P1.29   | -0.40351 | -0.5531  | -0.56214 | -0.5722  | -0.60197 | -0.68126 | -0.65794 | -0.75304 | -0.48952 | -0.24432  | -0.17725 | 0.0228   | 0.25182  | 0.49689  | 0.45229  | 0.49119  | 0.45157  | 0.52153  | -0.08625 | 0.16895  | 0.14695  | 0.01723  | -0.17177 | -0.34404 |
| PF10 0208   | 0.00772  | 0.05352  | 0.33445  | 0.36484  | 0.59986  | 0.61928  | 0.45629  | 0.21557  | -0.01081 | 0.0104    | 0.06438  | -0.02387 | 0.22613  | 0.40316  | 0.53628  | 0.57179  | 0.46212  | 0.12298  | 0.31252  | -0.15086 | -0.35207 | -0.33282 | -0.49534 | -0.25226 |
| PF14 0254   | -1.34407 | -1.49422 | -1.52113 | -1.748   | -1.71346 | -1.63355 | -1.68298 | -1.17512 | -0.92267 | -0.23774  | 0.30965  | 0.6161   | 0.82224  | 0.79364  | 1.00212  | 0.62303  | 0.34365  | 0.06847  | 0.02093  | -0.47784 | -0.71208 | -1.09425 | -1.4448  | -1.69656 |
| PFB0375w    | 0.81825  | 1.02371  | 1.05679  | 1.11981  | 1.11348  | 1.35312  | 1.21552  | 1.07826  | 0.9898   | 0.85326   | 0.63093  | 0.59469  | 0.38023  | 0.29551  | 0.01957  | -0.21613 | -0.36868 | -0.28347 | -0.58286 | -0.31769 | -0.24186 | 0.06952  | 0.32103  | 0.53818  |
| PF11 0185   | -0.13363 | -0.15104 | -0.10413 | 0.00286  | 0.19489  | 0.17928  | 0.31937  | 0.08079  | 0.00564  | -0.13751  | -0.35303 | -0.43118 | -0.21221 | 0.08829  | 0.21875  | 0.39271  | 0.86362  | 0.49447  | 0.10409  | 0.49426  | 0.57877  | 0.27116  | 0.19706  | 0.05251  |
| PFL1290w    | 0.48581  | 0.89042  | 1.04794  | 1.02241  | 1.09716  | 1.10444  | 1.0188   | 1.14483  | 1.09658  | 0.93778   | 0.8323   | 0.53231  | 0.25483  | 0.0713   | -0.08669 | -0.31242 | -0.41518 | -0.60235 | -0.5251  | -0.5841  | -0.36623 | -0.20949 | 0.01606  | 0.3496   |
| PF07071w    | 1.09995  | 0.33824  | -0.1357  | -0.23191 | -0.30096 | -0.63425 | -0.81949 | -0.62549 | -0.68844 | -0.62431  | -0.55225 | -0.33017 | -0.44821 | -0.38138 | -0.49898 | -0.64043 | -0.76997 | -0.28336 | 0.9553   | 0.94079  | 1.10699  | 1.06026  | 1.28044  | 1.3154   |
| PF11 0066   | -0.73029 | -0.77479 | -0.57291 | -1.11285 | -0.91163 | -1.04174 | -1.24654 | -1.23186 | -1.31111 | -1.17938  | -0.52699 | -0.11845 | 0.3826   | 0.44227  | 1.00628  | 0.83201  | 0.26537  | 0.40512  | 0.31954  | -0.12219 | -0.25099 | -0.61466 | -0.70882 | -0.52379 |
| PF11 0329   | 0.2737   | 0.02397  | -0.2844  | -0.04977 | -0.09722 | -0.20691 | -0.22034 | -0.25278 | -0.1515  | -0.15584  | -0.14926 | -0.05842 | 0.06123  | -0.00527 | 0.00272  | 0.0705   | -0.16015 | -0.07771 | 0.57808  | 0.31932  | 0.40396  | 0.35664  | 0.40856  | 0.54294  |
| PFL1580w    | 0.86335  | 0.27471  | -0.20827 | -0.26793 | -0.23879 | -0.52796 | -0.85514 | -0.76467 | -1.1136  | -1.12068  | -1.09738 | -1.11529 | -0.91832 | -0.53093 | -0.12576 | 0.23308  | 0.44231  | 0.80337  | 1.20428  | 1.24043  | 1.2598   | 0.95186  | 0.75195  | 0.69873  |
| PF14 0116   | 0.70246  | 0.39925  | -0.13746 | 0.31066  | 0.01112  | 0.22044  | 0.5392   | 0.34414  | 0.82738  | 0.78308   | 0.64962  | 0.62371  | 0.51172  | 0.57698  | 0.39587  | 0.10066  | -0.07909 | -0.24143 | -0.20378 | -0.29147 | -0.22437 | -0.14768 | 0.02725  | 0.15027  |
| PF14 0338   | -0.35415 | -0.49308 | -0.30177 | -0.40722 | -0.3724  | -0.14248 | -0.08017 | 0.05634  | 0.47507  | 0.67999   | 0.72899  | 0.7411   | 0.43944  | 0.5307   | 0.17957  | 0.04656  | -0.12193 | 0.04092  | -0.28181 | -0.02718 | 0.07137  | 0.12764  | 0.14969  | -0.025   |
| PF11 0206   | 0.74554  | 0.86623  | 0.96169  | 1.03296  | 0.94489  | 0.88755  | 0.65151  | 0.39776  | 0.19894  | -0.08562  | -0.13653 | -0.17722 | -0.03268 | -0.00901 | 0.04175  | 0.16247  | 0.19852  | -0.07007 | 0.06168  | 0.10595  | 0.14593  | 0.41015  | 0.38398  | 0.16478  |
| MAL13P1.168 | -0.25423 | -0.8356  | -1.02421 | -1.28089 | -1.42981 | -1.65905 | -1.62226 | -1.64269 | -1.70873 | -1.24646  | -0.77188 | -0.24112 | 0.24988  | 0.61011  | 0.7192   | 0.93954  | 0.58405  | 0.58344  | 0.5746   | 0.51365  | 0.09694  | 0.46546  | -0.66727 | -0.88657 |
| PF14 0226   | 0.33103  | -0.04622 | -0.48182 | -0.51225 | -0.63034 | -0.78099 | -0.90701 | -0.70371 | -0.98289 | -0.9263   | -1.11651 | -1.10858 | -1.03291 | -0.68397 | 0.05562  | 0.65548  | 0.98833  | 1.24887  | 1.58149  | 1.2458   | 1.04466  | 0.69124  | 0.3674   | -0.09562 |
| PFD0915w    | -0.23178 | 0.01061  | -0.13375 | -0.00274 | 0.06785  | 0.20229  | -0.02607 | 0.0587   | 0.07575  | 0.13783   | 0.38215  | 0.37443  | 0.64464  | 0.47103  | 0.47977  | 0.31806  | 0.05417  | 0.16549  | 0.35893  | 0.0535   | 0.11841  | 0.25105  | 0.36268  | 0.39726  |
| PFD0730w    | 0.42408  | 0.90532  | 0.82032  | 1.07038  | 1.23293  | 1.08349  | 0.83938  | 0.75587  | 0.0298   | 0.03633   | 0.1026   | 0.11699  | 0.20276  | 0.13589  | 0.19112  | 0.04574  | -0.06048 | -0.16876 | -0.64022 | -0.58115 | -0.21833 | -0.04092 | 0.24274  |          |
| PF11 0357   | -0.39526 | -0.40237 | -0.12535 | -0.0547  | 0.51414  | 0.8116   | 1.08042  | 0.96482  | 1.02273  | 0.81078   | 0.35881  | 0.17447  | 0.15277  | 0.28092  | -0.08558 | -0.14567 | 0.2682   | 0.16051  | -0.51926 | 0.23229  | 0.39909  | 0.38842  | 0.32419  | 0.23871  |
| PF13 0147   | -0.05963 | 0.16046  | 0.19621  | 0.01004  | 0.03768  | 0.02756  | 0.02825  | 0.0138   | 0.31258  | 0.32186   | 0.52656  | 0.57666  | 0.51309  | 0.31822  | 0.30023  | 0.12474  | -0.11071 | -0.25235 | -0.45694 | -0.62253 | -0.7085  | -0.43524 | -0.4962  | -0.27956 |
| PF10 0065   | -0.95603 | -0.68375 | -0.68102 | -0.93969 | -0.84652 | -0.4909  | -0.08531 | 0.36024  | 0.71345  | 0.92358   | 1.03127  | 1.18423  | 1.07241  | 0.6428   | 0.4947   | 0.36079  | -0.05527 | 0.10347  | -0.02527 | -0.42321 | -0.77594 | -0.87128 | -0.80986 | -0.74699 |
| MAL13P1.144 | 0.21917  | 0.59084  | 0.59615  | 0.75747  | 0.79481  | 0.83304  | 0.65813  | 0.67899  | 0.67948  | 0.56179   | 0.74385  | 0.74262  | 0.71171  | 0.42879  | 0.23777  | 0.12274  | -0.18525 | -0.45428 | -0.3462  | -0.88237 | -0.81507 | -0.39034 | -0.31009 | -0.14625 |
| PFD0760c    | -0.01367 | -0.50595 | -0.88935 | -0.77229 | -0.8057  | -1.23176 | -1.10363 | -0.87575 | -0.7137  | -0.55208  | -0.31696 | -0.14315 | 0.05086  | 0.37852  | 0.41905  | 0.37454  | 0.04229  | 0.21448  | 0.71928  | 0.55096  | 0.30725  | -0.19717 | 0.2348   | 0.67205  |
| PF13 0249   | -0.46034 | -1.12136 | -0.95756 | -1.04368 | -1.04397 | -1.16476 | -1.36626 | -1.48115 | -1.20352 | -0.65398  | -0.44983 | -0.06012 | 0.06775  | 0.26477  | 0.45347  | 0.75555  | 0.63224  | 0.71468  |          |          |          |          |          |          |



|             |          |          |          |          |          |          |          |          |          |          |          |          |          |          |          |          |          |          |          |          |          |          |          |          |
|-------------|----------|----------|----------|----------|----------|----------|----------|----------|----------|----------|----------|----------|----------|----------|----------|----------|----------|----------|----------|----------|----------|----------|----------|----------|
| PF14 0373   | -0.40032 | -0.54877 | -0.82214 | -0.51236 | -0.69939 | -0.82946 | -1.0375  | -1.02706 | -1.24614 | -1.18292 | -0.90431 | -0.8434  | -0.12701 | 0.00502  | 0.59112  | 0.83487  | 0.77689  | 0.5809   | 1.10119  | 0.66836  | 0.48787  | 0.11547  | 0.08418  | 0.01417  |
| PF11 0439   | -0.44732 | 0.75027  | 0.85066  | 1.27259  | 0.83918  | 1.24791  | 1.03366  | 1.00417  | 1.16273  | 0.94155  | 0.866    | 0.86431  | 0.48808  | 0.27573  | 0.17826  | -0.04899 | -0.42426 | -0.34244 | -0.28327 | -0.76029 | -0.63947 | -0.2173  | -0.11785 | 0.10149  |
| PF13 0251   | -0.44397 | -0.49805 | -0.60551 | -0.8444  | -1.19876 | -1.24152 | -1.31599 | -1.18566 | -0.81233 | -0.25548 | 0.01309  | 0.17016  | 0.43744  | 0.51717  | 0.57981  | 0.63006  | 0.67111  | 0.54593  | 0.63676  | 0.41818  | 0.27951  | 0.05811  | -0.10449 | -0.46578 |
| PFI0220w    | -0.61639 | -0.33275 | -0.05942 | 0.09049  | -0.02802 | 0.41129  | 0.49037  | 0.60535  | 0.76556  | 0.7564   | 1.02106  | 1.04558  | 1.00762  | 0.55512  | 0.58003  | 0.61865  | -0.10597 | 0.09936  | 0.24642  | -0.24342 | -0.58118 | -0.60552 | -0.65202 | -0.84956 |
| MAL7P1.16   | 0.3759   | 0.61438  | 0.7338   | 0.64975  | 0.71855  | 0.74378  | 0.76472  | 0.63041  | 0.75415  | 0.67234  | 0.72377  | 0.74463  | 0.7092   | 0.66057  | 0.23126  | -0.1388  | -0.09654 | -0.32232 | -0.61784 | -0.43514 | -0.35112 | -0.191   | -0.08028 | -0.12913 |
| PFD0675w    | -0.12063 | -0.26462 | -0.5369  | -0.5998  | -0.68889 | -0.47237 | -0.6162  | -0.63456 | -0.25963 | -0.0123  | 0.19122  | 0.30077  | 0.48677  | 0.58484  | 0.8266   | 1.05355  | 0.67687  | 0.87881  | 1.31091  | 0.92678  | 0.44987  | -0.04788 | -0.01367 | -0.27281 |
| PCF0770c    | -0.20879 | -0.39749 | -0.34035 | -0.60541 | -0.70607 | -1.04659 | -0.72707 | -0.64204 | -0.1137  | -0.23581 | -0.00032 | 0.24189  | 0.42302  | 0.60257  | 0.60912  | 0.46535  | 0.41194  | 0.5936   | 0.00314  | 0.08667  | -0.06482 | -0.20637 | -0.41153 | -0.65248 |
| PF14 0589   | -0.04185 | 0.24963  | 0.49233  | 0.59229  | 0.61456  | 0.75942  | 0.83984  | 0.86957  | 1.10237  | 1.09012  | 1.0022   | 1.14878  | 0.8319   | 0.55454  | 0.14364  | -0.32141 | -0.73827 | -0.93686 | -1.07029 | -1.65896 | -1.35986 | -0.89048 | -0.79314 | -0.44424 |
| PFL0790w    | 0.41475  | 0.75358  | 0.72089  | 0.78445  | 0.70041  | 0.51529  | 0.36326  | 0.24277  | -0.13579 | -0.27967 | -0.40805 | -0.20764 | -0.27256 | -0.12267 | 0.02873  | 0.11434  | 0.06052  | -0.05775 | -0.14937 | -0.11732 | 0.0039   | 0.21192  | 0.17899  | 0.26739  |
| PFD1006w    | 0.3438   | 0.32496  | 0.25083  | 0.179    | 0.26411  | 0.31798  | 0.37587  | 0.30444  | -0.01137 | -0.25802 | -0.1052  | -0.15306 | -0.05731 | -0.00764 | 0.10916  | 0.34137  | 0.36214  | 0.61574  | 0.93123  | 0.83638  | 0.8379   | 0.54316  | 0.30085  | 0.26233  |
| PF07 0074   | -0.14213 | -0.00457 | 0.04833  | -0.06135 | -0.29273 | -0.28016 | -0.12925 | 0.25521  | 0.44089  | 0.43576  | 0.30452  | 0.46843  | 0.44791  | 0.36512  | 0.13343  | 0.08036  | -0.19193 | -0.00388 | -0.04171 | -0.04319 | 3.60E-05 | -0.08272 | -0.26335 | -0.29534 |
| PF07 0122   | 0.73605  | 0.81871  | 0.90997  | 1.0155   | 1.0472   | 1.08793  | 1.02797  | 1.28683  | 1.48414  | 1.24709  | 1.22416  | 1.02153  | 0.6433   | 0.13871  | -0.12819 | -0.46841 | -1.30207 | -0.80576 | -1.06061 | -0.83722 | -0.43412 | -0.00944 | 0.19451  | 0.52665  |
| MAL13P1.490 | -1.41981 | -1.64792 | -1.05633 | -1.07126 | -0.39872 | 0.98304  | 2.16869  | 2.79279  | 2.5255   | 2.21363  | 1.71078  | 1.43244  | 0.8749   | 0.35159  | -0.10009 | -0.28037 | -2.11359 | -1.20777 | -1.02281 | -1.29416 | -1.44517 | -1.42001 | -1.45313 | -1.54961 |
| MAL8P1.51   | -0.5347  | -0.29899 | 0.00834  | 0.15341  | 0.09996  | 0.69877  | 0.84725  | 0.832    | 0.95278  | 0.36702  | 0.52577  | 0.36473  | 0.25478  | 0.3585   | 0.62004  | 0.45356  | 0.17822  | 0.19663  | 0.27586  | -0.0423  | -0.55782 | -0.48594 | -0.35602 | -0.54676 |
| MAL7P1.112  | 0.65902  | 0.81522  | 0.78175  | 0.74323  | 0.69068  | 0.67268  | 0.64819  | 0.58997  | 0.19999  | 0.11429  | 0.01193  | 0.10261  | 0.08382  | 0.15751  | 0.15922  | 0.17843  | 0.06689  | 0.14743  | 0.29753  | 0.19472  | -0.02378 | 0.19896  | 0.27909  | 0.32121  |
| PF14 0301   | -0.22893 | -0.26124 | -0.32989 | -0.05397 | 0.10849  | -0.08684 | 0.04237  | 0.57486  | 0.30377  | 0.2771   | 0.53299  | 0.53214  | 0.43112  | 0.24027  | 0.2034   | 0.19878  | -0.28161 | 0.02191  | -0.17577 | -0.39081 | -0.57908 | -0.38483 | -0.4712  | -0.38715 |
| PFL0 0238   | -0.29705 | -0.68675 | -0.59321 | -0.67615 | -0.68385 | -0.39965 | -0.16615 | -0.05677 | -0.13035 | -0.0917  | 0.12911  | 0.29656  | 0.51804  | 0.62846  | 0.77431  | 0.87714  | 0.55054  | 0.42789  | 0.6811   | 0.00045  | -0.11932 | -0.60144 | -0.58525 | -0.66852 |
| MAL13P1.258 | -0.79357 | -0.6071  | -0.651   | -0.33544 | -0.21259 | -0.26957 | -0.24464 | -0.31083 | 0.23253  | 0.3656   | 0.53968  | 0.77306  | 0.96068  | 0.7966   | 0.58955  | 0.36491  | 0.42095  | -0.20532 | -0.138   | -0.51588 | -0.56393 | -0.91407 | -0.75395 |          |
| PFL2180w    | -0.09519 | 0.18992  | 0.32504  | 0.64623  | 0.61028  | 0.91398  | 0.60215  | 0.80468  | 0.7484   | 0.56578  | 0.77843  | 0.61829  | 0.63221  | 0.41147  | 0.52365  | 0.47612  | 0.21988  | 0.33625  | 0.48774  | 0.01409  | -0.01095 | 0.15535  | 0.24192  | 0.33061  |
| PF1645c     | -0.83828 | -0.55095 | -0.30153 | 0.26725  | 0.41632  | 0.84928  | 0.9543   | 0.94883  | 0.97938  | 0.92763  | 0.81028  | 0.67754  | 0.48477  | 0.29426  | 0.20845  | 0.1026   | -0.01917 | -0.07418 | -0.35473 | -0.55152 | -0.91471 | -0.8545  | -0.75759 | -0.6187  |
| MAL13P1.495 | 0.20297  | 0.21253  | 0.19216  | 0.43469  | 0.59347  | 0.80443  | 1.39633  | 1.64683  | 1.40715  | 1.16863  | 1.15131  | 0.80857  | 0.67347  | 0.48697  | 0.21912  | 0.13965  | -0.14571 | 0.04247  | -0.21326 | -0.32131 | -0.56717 | -0.43312 | -0.64184 | -0.63123 |
| PF07 0061   | -0.56695 | -0.52613 | -0.44815 | -0.7003  | -0.62075 | -0.69497 | -0.81046 | -0.97193 | -1.16325 | -1.02969 | -0.88686 | -0.68948 | -0.1623  | 0.2995   | 0.39365  | 0.55912  | 0.80852  | 0.70398  | -0.10739 | 0.35025  | 0.30967  | 0.25678  | 0.14284  | -0.13233 |
| PF11 0389   | -0.04639 | -0.24552 | -0.89515 | -0.09478 | 0.06655  | -0.13009 | -0.07514 | -0.29676 | -0.01964 | 0.15381  | 0.09211  | 0.52917  | 0.44312  | 0.49237  | 0.42492  | 0.33626  | 0.58023  | 0.37197  | 0.24139  | 0.25439  | 0.20397  | 0.40192  | 0.43315  | 0.44666  |
| PF14 0668   | -0.47187 | -0.18346 | -0.13062 | -0.14296 | -0.00066 | 0.03264  | 0.26728  | 0.53297  | 0.77615  | 0.92959  | 0.91302  | 0.85082  | 0.65793  | 0.59349  | 0.34694  | 0.05773  | -0.12017 | -0.17811 | -0.52482 | -0.36753 | -0.4667  | -0.44382 | -0.50504 | -0.39205 |
| PF10 0060   | 0.35461  | 0.12061  | -0.40807 | 0.15832  | -0.05012 | -0.17077 | -0.18711 | -0.23468 | -0.32021 | -0.19437 | -0.2252  | -0.05767 | 0.02645  | 0.23123  | 0.45952  | 0.54333  | 0.47939  | 0.55235  | 0.65523  | 0.48868  | 0.31442  | 0.00668  | -0.06771 | -0.16411 |
| PFL0725w    | -0.19536 | -0.11021 | -0.0461  | -0.20412 | -0.22456 | -0.27032 | -0.48847 | -0.62435 | -0.954   | -0.91952 | -0.92482 | -1.13866 | -0.69706 | -0.64454 | 0.15713  | 0.39988  | 0.69746  | 0.46378  | 0.92921  | 0.64057  | 0.54249  | 0.32562  | 0.27416  | 0.22944  |
| PF14 0698   | 0.21792  | 0.93296  | 0.768    | 0.99199  | 0.98906  | 0.97572  | 1.398    | 1.23259  | 1.21142  | 1.04432  | 0.83089  | 0.76116  | 0.63856  | 0.43286  | 0.13949  | 0.03862  | 0.02877  | -0.15435 | -0.33502 | -0.4103  | -0.29123 | -0.29683 | -0.19482 | -0.07253 |
| PF14 0577   | -0.52778 | -0.87513 | -1.5446  | -0.82601 | -0.84965 | -0.95494 | -0.77907 | -0.83585 | -0.46763 | -0.00169 | -0.0769  | 0.16827  | 0.50343  | 0.86186  | 0.6141   | 0.55439  | 0.56425  | 0.61591  | -0.23619 | 0.26401  | 0.23312  | 0.12473  | 0.02493  | -0.1322  |
| PF14 0215   | -0.13643 | -0.33516 | -0.52377 | -0.6798  | -0.6242  | -0.68262 | -0.86202 | -0.93872 | -1.09736 | -1.1004  | -0.73581 | -0.50685 | -0.18438 | 0.05472  | 0.54079  | 0.79836  | 0.42915  | 0.78003  | 0.83323  | 0.32992  | 0.06567  | -0.10182 | -0.26356 |          |
| PF13 0263   | 0.43807  | 0.75977  | 0.7804   | 0.85168  | 0.80145  | 0.39486  | 0.40256  | 0.71759  | 0.34038  | 0.46997  | 0.63996  | 0.45585  | 0.25389  | 0.13958  | 0.22656  | -0.07947 | -0.50473 | -0.5295  | -0.71815 | -0.70763 | -0.39152 | -0.2621  | -0.09084 | 0.30144  |
| PFE1070c    | 0.32399  | 0.70739  | 1.09092  | 0.86401  | 0.83776  | 0.89994  | 0.95124  | 0.60118  | 0.40138  | 0.24537  | 0.07869  | -0.16698 | -0.20609 | -0.15061 | -0.18759 | -0.41877 | -0.36238 | -0.69421 | -0.92348 | -0.71703 | -0.56118 | -0.15503 | 0.19238  | 0.28646  |
| MAL13P1.298 | 0.76179  | 0.76668  | 0.39594  | 0.86455  | 0.78712  | 0.63151  | 0.4961   | 0.25633  | 0.01167  | -0.22626 | -0.50018 | -0.63108 | -0.42876 | -0.13981 | -0.08437 | 0.09019  | 0.23269  | 0.18963  | 0.36432  | 0.42854  | 0.53075  | 0.58607  | 0.55601  | 0.5477   |
| PCF0920w    | 0        | -0.3135  | -0.62219 | -0.92314 | -1.65511 | -1.31119 | -1.53557 | -1.67478 | -1.92511 | -1.83999 | -1.64596 | -1.34173 | -1.14558 | -0.76222 | 0.22763  | 0.13209  | 0.19952  | 0.77214  | 0.80417  | 0.63009  | 0.489    | 1.07771  | -0.22069 |          |
| MAL8P1.57   | 0.56152  | 0.71874  | 0.63693  | 0.79637  | 0.78681  | 0.6037   | 0.58687  | 0.67761  | 0.11237  | -0.12331 | -0.1606  | -0.3003  | -0.44001 | -0.52949 | -0.49506 | -0.37639 | -0.04637 | -0.40873 | 0.02648  | -0.12029 | 0.16152  | 0.28555  | 0.48532  | 0.57959  |
| MAL13P1.121 | -0.57651 | -1.17596 | -2.28536 | -1.63539 | -1.54081 | -1.91765 | -1.90235 | -1.83138 | -1.75001 | -1.14697 | -0.58359 | -0.08851 | 0.36315  | 0.7902   | 0.98461  | 1.05852  | 0.58917  | 0.72798  | 0.55259  | 0.17053  | -0.17818 | -0.47571 | -0.80294 | -0.74115 |
| PF13 0266   | 0.2354   | 0.25819  | 0.10899  | 0.28026  | 0.21973  | 0.35128  | 0.20479  | 0.40333  | -0.14528 | -0.02443 | 0.15377  | 0.14416  | 0.11382  | 0.00458  | 0.38079  | 0.48728  | 0.78172  | 0.43967  | 0.91368  | 0.62922  | 0.73093  | 0.26408  | 0.5608   | 0.53213  |
| PF11 0319   | -0.6356  | -0.80366 | -0.40952 | -0.67178 | -0.64928 | -0.48325 | 0.03891  | 0.52641  | 1.26341  | 1.27756  | 1.14606  | 1.14054  | 0.94326  | 0.76214  | 0.45442  | 0.16535  | 0.02354  | -0.08063 | -0.32072 | -0.33343 | -0.46818 | -0.40598 | -0.43755 | -0.33746 |
| PF08 0082   | 0.22279  | -0.11677 | -0.25252 | -0.41113 | -0.6139  | -0.82822 | -0.96456 | -1.34123 | -1.9267  | -1.93935 | -2.00358 | -2.15397 | -2.04051 | -1.63083 | -0.53986 | 0.42318  | 1.09614  | 0.68616  | 1.40899  | 1.22579  | 1.30331  | 0.85781  | 0.91808  | 0.35226  |
| MAL13P1.194 | -0.82361 | -1.06396 | -1.03459 | -1.48509 | -1.7142  | -1.77555 | -1.5531  | -1.48811 | -0.92205 | -0.57805 | -0.31556 | 0.01216  | 0.22168  | 0.45019  | 0.78772  | 0.88651  | 0.64006  | 0.70433  | 0.55976  | 0.28536  | -0.0229  | -0.58909 | -0.73735 | -1.09515 |
| PFE1320w    | 0.47372  | 0.74889  | 0.52294  | 0.82353  | 0.84743  | 0.83627  | 0.72762  | 0.52903  | 0.45355  | 0.53556  | 0.43955  | 0.29566  | 0.28625  | 0.27566  | 0.09152  | -0.22291 | -0.23225 | -0.40007 | -0.63096 | -0.67471 | -0.50392 | -0.13935 | -0.12157 | 0.12791  |
| PF11 0455   | -0.46415 | -0.83982 | -0.42601 | -0.2439  | -0.11964 | -0.14118 | -0.18271 | 0.64791  | 1.06417  | 0.9311   | 0.94051  | 0.82357  | 0.72542  | 0.47185  | 0.34105  | 0.21256  | -0.05465 | 0.02173  | 0.32334  | -0.13708 | -0.0005  |          |          |          |

|               |          |          |          |          |          |          |          |          |          |          |          |          |          |          |          |          |          |          |          |          |          |          |          |          |
|---------------|----------|----------|----------|----------|----------|----------|----------|----------|----------|----------|----------|----------|----------|----------|----------|----------|----------|----------|----------|----------|----------|----------|----------|----------|
| PFB0410c      | 0.83113  | 1.09461  | 0.65576  | 1.03435  | 0.9878   | 1.05972  | 0.80672  | 0.54111  | 0.16666  | 0.05581  | 0.09545  | 0.13395  | 0.11865  | 0.18381  | 0.24916  | 0.36536  | 0.03545  | 0.13857  | 0.30475  | 0.07786  | -0.03499 | 0.11797  | 0.29792  | 0.43606  |
| PFL0445w      | -0.90375 | -1.20179 | -0.84746 | -1.01743 | -0.89991 | -0.83305 | -0.78724 | -0.46967 | -0.15389 | 0.08284  | 0.24598  | 0.37922  | 0.3906   | 0.56158  | 0.55524  | 0.36724  | 0.25849  | 0.25242  | 0.01338  | -0.20898 | -0.31661 | -0.44941 | -0.58286 |          |
| PFD0600c      | -0.2675  | 0.36132  | 0.09973  | 0.71728  | 0.18728  | 0.34056  | 0.24659  | 0.50611  | 0.51167  | 0.57736  | 0.77032  | 0.76678  | 0.69836  | 0.55303  | 0.75883  | 0.70414  | 0.15202  | 0.45592  | 0.34167  | -0.20876 | -0.43123 | -0.70441 | -0.78387 | -0.58546 |
| PF14_0053     | -0.82884 | -0.95177 | -1.27342 | -1.13765 | -1.21035 | -1.77767 | -1.7905  | -1.48366 | -0.97399 | -0.18098 | 0.51942  | 0.49217  | 0.65557  | 0.62902  | 0.87243  | 0.72136  | 0.14112  | 0.04903  | 0.13931  | -0.28215 | -0.43248 | -0.71151 | -0.72002 | -0.93596 |
| PFC0395w      | -0.11559 | 0.55501  | 0.24993  | 0.4391   | 0.61598  | 0.80218  | 0.72129  | 0.85095  | -0.06152 | 0.40709  | 0.70898  | 0.49249  | 0.26129  | 0.36886  | 0.02567  | -0.06777 | -0.53676 | -0.64212 | -0.46313 | -0.74383 | -0.80202 | -0.49968 | -0.22261 | -0.48002 |
| PF14_0630     | -0.533   | -0.7885  | -1.02454 | -1.18538 | -1.27209 | -1.14965 | -1.30584 | -1.22955 | -0.72401 | -0.31289 | -0.02009 | 0.05524  | 0.36595  | 0.43074  | 0.74816  | 0.78383  | 0.51846  | 0.86527  | 0.32212  | 0.21359  | -0.03318 | -0.19732 | -0.46314 |          |
| PFF0830w      | 0.82983  | 0.44353  | 0.6679   | 0.75278  | 0.70674  | 0.69052  | 0.50027  | 0.3333   | 0.67324  | 0.62487  | 0.41299  | 0.39323  | 0.30883  | 0.22222  | 0.30278  | -0.30521 | -0.22705 | -0.50518 | 0.44751  | 0.0789   | 0.36472  | 0.66291  | 0.79937  | 0.71806  |
| PFC0925w      | -0.17108 | 0.01165  | 0.04785  | 0.04984  | 0.1023   | 0.2087   | 0.38707  | 0.30872  | 0.41444  | 0.25846  | 0.21578  | 0.33766  | 0.4273   | 0.39256  | 0.11358  | -0.22403 | -0.13103 | -0.05061 | -0.49638 | -0.32394 | -0.11728 | -0.21306 | -0.20093 | 0.04829  |
| PF14_0482     | 0.18808  | 0.47739  | 0.35628  | 0.50577  | 0.47998  | 0.24418  | 0.31416  | 0.43434  | 0.3131   | 0.39715  | 0.39241  | 0.41767  | 0.29464  | 0.20619  | 0.19404  | -0.06692 | -0.02406 | -0.0732  | -0.56427 | -0.3223  | -0.15564 | -0.02521 | -0.02351 | 0.09455  |
| PFF0715c      | -0.17624 | -0.24629 | -0.27218 | -0.21895 | -0.11353 | 0.0368   | 0.30377  | 0.52212  | 0.64234  | 0.73128  | 0.93766  | 0.71896  | 0.7407   | 0.44976  | 0.44614  | 0.23466  | 0.15976  | 0.03752  | 0.1211   | -0.02968 | -0.01054 | -0.34363 | -0.12727 | -0.30085 |
| PF10_0298     | -0.41197 | -0.233   | -0.02872 | -0.0482  | -0.02414 | -0.01535 | -0.09896 | 0.16874  | 0.27191  | 0.39815  | 0.49492  | 0.6582   | 0.48876  | 0.41513  | 0.55414  | 0.52557  | 0.07026  | 0.11597  | 0.58102  | 0.02074  | -0.18844 | -0.45148 | -0.30742 | -0.40119 |
| PFL1730c      | 0.36582  | 0.09427  | 0.82693  | 0.26686  | 0.37386  | 0.72682  | 0.38153  | 0.13496  | 0.41554  | 0.65714  | 0.73525  | 0.80413  | 0.7932   | 0.68007  | 0.43519  | 0.25058  | -0.18004 | 0.00576  | -0.19291 | -0.35014 | -0.30274 | -0.26765 | -0.2795  | -0.16519 |
| PF10_0377     | 0.31137  | 0.49642  | 0.16209  | 0.63168  | 0.92783  | 0.7723   | 0.67966  | 0.70892  | 0.62494  | 0.58302  | 0.53938  | 0.41219  | 0.36991  | 0.26798  | 0.21527  | 0.00971  | 0.07082  | 0.03987  | 0.12451  | 0.32769  | 0.39903  | 0.33493  | -0.00589 | 0.7941   |
| PFL1170w      | 0.15846  | 0.26429  | 0.64341  | 0.3859   | 0.41687  | 0.08635  | 0.16401  | -0.28071 | -0.25522 | 0.13432  | -0.14859 | 0.13075  | 0.09495  | 0.32311  | -0.02378 | -0.14321 | -0.37486 | -0.57871 | -1.64671 | -0.92156 | -0.77206 | -0.58148 | -0.36706 | -0.15786 |
| PFE1260c      | 1.41109  | 0.69203  | -0.08164 | -0.01628 | -0.32645 | -0.58453 | -0.88219 | -1.37773 | -1.44873 | -1.57625 | -1.60708 | -1.47383 | -1.70805 | -1.58379 | -1.7115  | -1.67867 | -1.1354  | -0.3419  | 1.36305  | 1.20487  | 1.47267  | 1.42514  | 1.56505  | 1.66572  |
| PFI0415c      | 0.89685  | 1.51193  | 1.33382  | 1.27504  | 0.76369  | 1.42002  | 1.24709  | 1.44276  | 1.50136  | 0.82975  | 1.10838  | 0.98825  | 0.47151  | 0.37738  | 0.37529  | 0.09671  | -0.75249 | -0.40045 | -0.5016  | -0.8817  | -0.64372 | -0.08913 | 0.15736  | 0.27173  |
| PFF13_0124    | 0.35404  | 0.20026  | -0.06509 | 0.26853  | 0.55513  | 0.59651  | 0.4714   | 0.60518  | 0.50537  | 0.3546   | 0.51288  | 0.27892  | 0.25793  | -0.01912 | -0.16921 | -0.31943 | -0.68848 | -0.51952 | -0.11824 | -0.37451 | -0.28289 | 0        | 0.25602  | 0.48864  |
| PF14_0044     | 2.13012  | 1.1245   | 0.06157  | 0.84703  | 0.9632   | 0.26179  | -0.16542 | -0.28083 | -0.96561 | -1.11419 | -1.07953 | -1.05384 | -1.26411 | -1.37065 | -1.47572 | -1.13738 | -2.35576 | 0.72982  | 1.61406  | 1.42092  | 1.53469  | 1.33914  | 1.68832  | 2.19534  |
| PF10_0024     | 2.13767  | 2.4113   | 2.11377  | 1.93815  | 1.61915  | 1.19426  | 0.53465  | -0.32988 | -0.9677  | -0.97114 | -0.86547 | -0.89695 | -0.65305 | -0.71258 | -0.54157 | -0.81407 | -0.6219  | -0.97914 | -0.7276  | -0.50134 | 0.19522  | 1.05232  | 1.39832  | 1.4458   |
| PFC10_API0028 | -0.18682 | -0.88758 | -0.74587 | -1.25978 | -1.26278 | -1.30482 | -1.46369 | -1.12839 | -1.08606 | -1.0992  | -1.13534 | -0.70605 | -0.68102 | -0.2524  | -0.19118 | 0.44601  | 0.84754  | 1.30152  | 0.1526   | 0.38547  | 0.18936  | 0.94595  | 0.34459  | -0.01106 |
| PF10_0270     | 0.02618  | 0.39653  | 1.10981  | 0.9493   | 0.9467   | 0.85324  | 0.45665  | 1.16768  | 1.01056  | 0.82368  | 0.77303  | 0.85203  | 0.65734  | 0.44285  | 0.22854  | 0.08709  | -0.26573 | -0.30627 | -0.22686 | -0.33173 | -0.31393 | -0.34522 | -0.22967 | -0.09346 |
| PFE0690c      | -0.90877 | -1.35874 | -0.84676 | -1.3596  | -1.60265 | -1.41916 | -1.42965 | -1.22066 | -0.60849 | -0.02071 | 0.38987  | 0.63704  | 0.85406  | 0.761    | 0.97879  | 0.78833  | 0.45442  | 0.31689  | 0.05824  | -0.36402 | -0.70595 | -0.89113 | -0.90702 | -1.01387 |
| PFB0210c      | 0.04644  | -0.12567 | -0.14091 | 0.03602  | 0.20199  | 0.41616  | 0.27439  | 0.60522  | 0.40444  | 0.34911  | 0.40463  | 0.43325  | 0.31388  | 0.19353  | -0.05356 | -0.07832 | -0.28631 | -0.35147 | -0.19851 | -0.48714 | -0.44095 | -0.21806 | -0.15915 | 0.11546  |
| PFI1300w      | -0.34287 | -0.33309 | -0.34224 | -0.42993 | -0.59506 | -0.46883 | -0.25303 | 0.45345  | 0.80028  | 0.78215  | 0.766    | 1.1188   | 0.61254  | 0.55021  | 0.486    | 0.37144  | -0.06057 | 0.32377  | 0.37483  | 0.13942  | -0.18989 | -0.05445 | -0.09418 | -0.33689 |
| PFI1075w      | 0.01211  | 0.47227  | 0.3553   | 0.42931  | 0.43398  | 0.45979  | 0.42384  | 0.5076   | 0.52117  | 0.52286  | 0.59756  | 0.58527  | 0.3678   | 0.14094  | 0.15644  | -0.23116 | -0.67196 | -0.5707  | -1.06889 | -0.86496 | -0.60962 | -0.59079 | -0.38907 | -0.16664 |
| PF13_0232     | -0.22319 | -0.02444 | 0.00232  | 0.24255  | 0.14638  | 0.11947  | 0.17718  | 0.39371  | 0.57881  | 0.55384  | 0.79406  | 1.05327  | 1.05859  | 0.93298  | 0.9524   | 0.64957  | 0.02259  | -0.0028  | -0.29055 | -0.63211 | -0.68465 | -0.39871 | -0.44107 | -0.24228 |
| PFI0480w      | 0.42241  | 0.55523  | 0.798    | 0.7131   | 0.6382   | 0.5876   | 0.34504  | 0.23857  | 0.19279  | 0.30252  | 0.47302  | 0.37301  | 0.51271  | 0.29343  | 0.25781  | 0.13237  | 0.04045  | -0.20811 | -0.23323 | -0.50486 | -0.19795 | -0.04002 | 0.02267  | 0.13966  |
| PF14_0013     | 1.5577   | 1.89382  | 1.93923  | 1.94899  | 1.74233  | 1.16136  | 0.63681  | 0.11046  | -0.68715 | -1.35384 | -1.66318 | -2.3747  | -2.715   | -3.3247  | -3.76471 | -3.68265 | -3.49301 | -1.40939 | -0.50753 | 0.25147  | 0.44136  | 1.11311  | 1.50176  |          |
| MAL13P1.213   | 0.45776  | 0.66085  | 0.54203  | 0.60417  | 0.68503  | 0.72755  | 0.54052  | 0.78591  | 0.56898  | 0.36095  | 0.57328  | 0.40365  | 0.22103  | -0.2604  | -0.15085 | -0.28742 | -0.38394 | -0.68687 | -0.06932 | -0.44392 | -0.23559 | -0.04671 | 0.17316  | 0.667    |
| PF14_0076     | 1.21456  | 1.3615   | 1.40404  | 1.51786  | 1.47533  | 1.18033  | 0.94118  | 0.63092  | 0.63738  | 0.46987  | 0.26113  | 0.04401  | -0.35717 | -0.75203 | -1.2132  | -1.5019  | -1.94825 | -2.07974 | -1.86963 | -1.44691 | -0.40322 | 0.57212  | 0.60924  | 0.73158  |
| PFD0350w      | 0.49597  | 0.56383  | 0.69671  | 0.32548  | 0.26157  | 0.35721  | 0.30048  | 0.39489  | 0.58799  | 0.68332  | 0.47868  | 0.50376  | 0.56907  | 0.41309  | 0.49535  | 0.33282  | 0.10869  | 0.22799  | -0.00741 | -0.07487 | -0.18651 | -0.07738 | 0.02117  | 0.2653   |
| PF14_0132     | -0.77769 | -1.01128 | -0.87745 | -1.02503 | -1.20531 | -1.0462  | -1.27319 | -1.14594 | -0.64438 | -0.10719 | 0.22124  | 0.35022  | 0.63735  | 0.8147   | 0.93249  | 0.73952  | 0.89982  | 0.63347  | 0.34861  | 0.28542  | -0.12267 | -0.55163 | -0.5754  | -0.57949 |
| PF11_0370     | -0.46479 | -0.6018  | -0.67131 | -0.76998 | -0.55794 | -0.61806 | -0.85544 | -1.0591  | -1.58552 | -1.48355 | -0.96014 | -0.67631 | -0.03558 | 0.19091  | 0.69593  | 0.81343  | 0.54796  | 0.55533  | 0.61045  | 0.34064  | 0.02793  | -0.41151 | -0.64431 | -0.78637 |
| PFO8_0025     | 0.404    | 0.56991  | 0.45933  | 0.40634  | 0.35975  | 0.01822  | 0.12424  | 0.10632  | -0.05774 | -0.00058 | 0.10231  | 0.13356  | 0.35362  | 0.22773  | 0.39802  | 0.23128  | -0.01996 | 0.11942  | -0.24663 | -0.0022  | 0.02343  | -0.06733 | 0.23303  | 0.40572  |
| PF07_0066     | 0.22144  | 0.35177  | 0.61066  | 0.52893  | 0.44876  | 0.48646  | 0.46825  | 0.40086  | 0.66286  | 0.59206  | 0.67208  | 0.82818  | 0.81719  | 0.7779   | 0.43966  | 0.03994  | -0.30754 | -0.35086 | -0.92134 | -0.83245 | -0.65366 | -0.21313 | -0.26002 | 0.03263  |
| PFC0630w      | -0.3869  | -0.19962 | -0.38947 | -0.53752 | -0.44832 | -0.62661 | -0.6626  | -0.48895 | -0.21928 | 0.14264  | 0.45061  | 0.67246  | 0.97592  | 0.69938  | 0.78347  | 0.62605  | 0.16314  | 0.4893   | 0.3328   | 0.04268  | 0.02091  | -0.13436 | -0.14658 | -0.05266 |
| PFE0160c      | -0.46539 | 0.08624  | 0.33918  | 0.18804  | 0.19435  | 0.29226  | 0.41658  | 0.2828   | 0.58318  | 0.56299  | 0.46994  | 0.64933  | 0.3246   | 0.11731  | -0.12551 | -0.44403 | -0.59592 | -0.75902 | -1.09912 | -1.0289  | -1.14182 | -0.60085 | -0.53102 | -0.53907 |
| MAL13P1.239   | -0.75411 | -0.94391 | -0.93642 | -0.99307 | -1.05915 | -1.08545 | -1.14279 | -0.92284 | -0.10385 | 0.3156   | 0.42357  | 0.6622   | 0.74001  | 0.92373  | 0.63064  | 0.43464  | 0.43925  | 0.29421  | -0.09605 | -0.26043 | -0.35203 | -0.37474 | -0.61126 | -0.70168 |
| PF14_0538     | -1.02051 | -0.82748 | -0.9323  | -1.18145 | -1.24712 | -1.27945 | -1.18731 | -1.15496 | -0.74919 | -0.28184 | 0.16715  | 0.43956  | 0.70939  | 0.85015  | 0.77702  | 0.51747  | 0.65964  | 0.1507   | -0.31843 | -0.26564 | -0.41067 | -0.4903  | -0.76631 | -1.00059 |
| PFC0130c      | 1.11267  | 1.09067  | 0.84215  | 1.16771  | 1.319    | 0.92276  | 0.93082  | 1.25462  | 0.85926  | 0.8572   | 0.76315  | 0.61215  | 0.12605  | -0.19662 | -0.45262 | -0.43969 | -0.60146 | -0.26389 | 0.33779  | 0.40965  | 0.48255  | 0.32353  | 0.69836  | 0.97115  |
| PFD0780w      | -0.27814 | -0.54351 | -0.52657 | -0.62436 | -0.43318 | -0.20331 | -0.05365 | -0.10407 | -0.16118 | -0.19603 | -0.0324  | 0.24256  | 0.27651  | 0.48396  | 0.64344  | 0.58552  | 0.36045  | 0.65317  | 0.32426  | 0.33857  | 0.06284  | 0.02522  | -0.14068 | -        |

|               |          |          |          |          |          |          |          |          |          |          |          |          |          |          |          |          |          |          |          |          |          |          |          |          |
|---------------|----------|----------|----------|----------|----------|----------|----------|----------|----------|----------|----------|----------|----------|----------|----------|----------|----------|----------|----------|----------|----------|----------|----------|----------|
| PF14 0740     | -0.92982 | -1.11764 | -0.67714 | -0.53855 | 0.22629  | 1.37012  | 2.37957  | 2.13722  | 1.55594  | 1.2073   | 0.62473  | -0.24941 | -1.00888 | -1.74393 | -1.83447 | -2.39547 | -0.37523 | -1.80895 | -1.07319 | -2.00954 | -1.64478 | -1.30847 | -1.16239 | -0.75214 |
| PF13 0062     | -0.61688 | -0.44714 | -0.10415 | 0.11353  | 0.21587  | 0.25993  | 0.33874  | 0.39863  | 0.20413  | 0.24067  | 0.29252  | 0.29153  | 0.31959  | 0.29416  | 0.26411  | 0.13003  | -0.02024 | -0.22003 | -0.36804 | -0.58507 | -0.7023  | -0.63816 | -0.51536 |          |
| PF11390w      | 0.0905   | 0.47407  | 0.53962  | 0.27176  | 0.8164   | 0.86978  | 0.80848  | 0.70858  | 0.73948  | 0.69766  | 0.74866  | 0.52656  | 0.46221  | 0.20643  | 0.30224  | 0.15635  | -0.08861 | -0.34113 | 0.29169  | -0.17377 | -0.13452 | -0.24593 | 0.06812  | 0.43628  |
| PFF1405c      | -0.30556 | -0.39876 | -0.51424 | -0.72544 | -0.53645 | -0.39414 | -0.03192 | 0.75158  | 0.63564  | 0.8814   | 0.90784  | 0.76837  | 0.73562  | 0.54874  | 0.48219  | 0.35231  | 0.01269  | -0.00604 | -0.08506 | -0.22842 | -0.41086 | -0.73964 | -0.74269 | -0.5214  |
| PFD0200c      | 0.18379  | 0.14431  | -0.09012 | 0.05403  | 0.01611  | 0.1512   | 0.31956  | 0.11212  | 0.20362  | 0.14645  | -0.09142 | 0.05149  | -0.08271 | -0.03566 | 0.30599  | 0.5737   | 0.55804  | 0.55486  | 0.34591  | 0.41374  | 0.3004   | 0.36721  | 0.17797  | 0.09378  |
| MAL7P1.138    | 0.18992  | 0.35796  | 0.56829  | 0.55776  | 0.39587  | 0.42172  | 0.36763  | 0.31102  | 0.46725  | 0.37501  | 0.37222  | 0.31398  | 0.38594  | 0.37987  | 0.39557  | 0.26016  | 0.38835  | 0.26501  | 0.12184  | 0.13118  | -0.06617 | 0.07486  | -0.03391 | 0.00417  |
| MAL13P1.390   | -0.7933  | -0.09428 | 0.14896  | -0.80583 | -0.39376 | -0.34466 | -0.83564 | -0.07448 | 0.35502  | 0.44525  | 0.71591  | 0.79629  | 0.8455   | 0.66939  | 0.49561  | 0.29814  | 0.06855  | -0.11825 | -0.12368 | -0.39679 | -0.49742 | -0.07503 | -0.56756 | -0.11324 |
| PFB0115w      | -0.46553 | -0.54208 | -0.70591 | 0.17809  | 0.64089  | 0.78702  | 0.77099  | 0.48627  | 0.56462  | 0.3159   | -0.16568 | 0.04407  | 0.19597  | 0.61837  | 0.41475  | 0.38021  | 0.6205   | 0.77555  | -0.36431 | 0.36991  | 0.04471  | -0.08032 | -0.24396 | -0.37442 |
| PF14 0530     | 0.3977   | -0.11884 | -0.64554 | -0.71244 | -0.96357 | -1.07531 | -1.11405 | -1.25957 | -1.17034 | -1.15982 | -1.01416 | -0.81811 | -0.76722 | -0.57905 | -0.10722 | 0.54575  | 0.80322  | 0.74427  | 1.13785  | 1.18438  | 1.09026  | 0.53575  | 0.24085  | -0.23909 |
| PFF08 0132    | -1.39343 | -1.91912 | -1.60492 | -2.01221 | -1.67489 | -0.46398 | 0.22752  | 0.39041  | 0.72436  | 0.70864  | 0.73132  | 0.79977  | 0.80902  | 0.76423  | 0.66246  | 0.15923  | -0.00388 | -0.41366 | -0.83118 | -1.30298 | -1.5288  | -1.27992 | -1.50526 | -1.53128 |
| PFF0225w      | -0.11528 | -0.23843 | -0.94495 | 0.15051  | 0.00302  | -0.07603 | 0.4045   | 0.56984  | 0.97183  | 0.89705  | 0.78814  | 0.85043  | 0.70242  | 0.67546  | 0.46148  | 0.2029   | 0.12347  | -0.06404 | -0.17694 | -0.33261 | -0.38226 | -0.18646 | -0.16818 | -0.16463 |
| PF13 0227     | -0.53555 | -0.27063 | 0.01022  | -0.1514  | 0.04497  | 0.31144  | 0.34122  | 0.52204  | 0.47736  | 0.40606  | 0.47253  | 0.46472  | 0.46016  | 0.13863  | 0.32998  | 0.2128   | -0.10985 | -0.12386 | -0.03569 | -0.48315 | -0.60073 | -0.64288 | -0.44582 | -0.42582 |
| PFL2125c      | 0.57742  | 0.74002  | 0.81079  | 0.95668  | 1.1093   | 1.09772  | 0.97798  | 0.94106  | 0.90538  | 0.70675  | 0.67769  | 0.71964  | 0.56286  | 0.42418  | 0.14105  | -0.06025 | -0.16217 | -0.15003 | -0.35629 | -0.50838 | -0.54089 | -0.2736  | -0.03179 | 0.13101  |
| PF08 0016     | 0.62008  | 0.77711  | 0.95302  | 0.84232  | 0.62095  | 0.73066  | 0.53233  | 0.65244  | 0.68259  | 0.60162  | 0.60711  | 0.50343  | 0.53802  | 0.27768  | 0.06289  | -0.18286 | -0.19292 | -0.47983 | -0.51855 | -0.75202 | -0.59579 | 0.03205  | -0.0904  | 0.3575   |
| MAL7P1.137    | 1.25308  | 0.39587  | -0.12669 | -0.40193 | -0.8001  | -1.0889  | -1.26958 | -1.39819 | -1.69117 | -1.63961 | -1.51596 | -1.27985 | -1.01724 | -1.18164 | -0.83781 | -0.86222 | -0.62168 | -0.19319 | 0.87358  | 0.80355  | 0.88428  | 1.32329  | 1.09946  | 0.93715  |
| PF08 0121     | 0.58754  | 0.99984  | 1.28706  | 1.16556  | 1.00998  | 1.06033  | 0.83521  | 0.76563  | 0.48635  | 0.32057  | 0.50698  | 0.5432   | 0.48849  | 0.24041  | 0.42017  | 0.03851  | -0.66406 | -0.57301 | -0.57593 | -0.99903 | -0.82571 | -0.36811 | -0.18609 | 0.16307  |
| PFI0645w      | -1.1556  | -0.29462 | -0.0944  | -0.11924 | -0.15944 | 0.05363  | 0.01517  | 0.18719  | -0.15554 | 0.43738  | 0.57363  | 0.41363  | 0.50214  | 0.28848  | 0.3547   | 0.15316  | -0.42626 | -0.63924 | -1.08853 | -1.66576 | -1.79157 | -1.40152 | -1.53038 | -1.24436 |
| PF11 0174     | 0.51198  | 0.53007  | 0.11091  | -0.01083 | 0.03187  | -0.03173 | 0.21219  | 0.48851  | 0.34123  | 0.39471  | 0.4394   | -0.00156 | 0.03299  | -0.25957 | -0.43716 | -0.84912 | -1.2433  | -1.02478 | -0.48522 | -0.62045 | -0.21876 | -0.15156 | -0.02718 | -0.13314 |
| MAL7P1.13     | -0.57271 | -0.81092 | -0.73157 | -1.44022 | -1.4865  | -1.75122 | -1.86766 | -1.6527  | -1.76463 | -1.84533 | -1.43828 | -1.34156 | -0.93657 | -0.83944 | -0.08323 | 0.43931  | 0.95328  | 0.70338  | 0.72649  | 0.48944  | 0.55017  | 0.22494  | -0.14203 | -0.47053 |
| PFF0610c      | 0.25656  | -0.22288 | -0.37062 | -0.56169 | -0.68404 | -0.80732 | -0.79299 | -0.84683 | -0.77809 | -0.97122 | -1.07149 | -1.1049  | -1.17187 | -1.00619 | -0.62621 | -0.13806 | 0.15888  | 0.59048  | 0.70566  | 0.79179  | 0.60843  | 0.38024  | 0.59127  | 0.52034  |
| PFF0270c      | -0.05202 | 0.1221   | 0.06359  | -0.44708 | -0.54738 | -0.78908 | -0.82112 | -0.47656 | -0.41375 | -0.31181 | -0.14212 | -0.16429 | 0.22143  | 0.34701  | 0.56425  | 0.55502  | 0.72855  | 0.84738  | 0.56805  | 0.62871  | 0.3871   | -0.07522 | -0.19261 | -0.42215 |
| PFE1325w      | -0.43941 | -0.25439 | -0.06013 | -0.28939 | -0.07321 | 0.04211  | 0.00827  | -0.16835 | 0.43459  | 0.64509  | 0.68964  | 0.81577  | 0.78375  | 0.81529  | 0.45813  | 0.34248  | 0.28684  | 0.11516  | -0.29985 | -0.02112 | -0.12066 | 0.09955  | -0.02861 | -0.13212 |
| PF10 0334     | -0.63502 | -0.86086 | -0.7645  | -1.0123  | -1.04375 | -1.06843 | -1.08973 | -0.71344 | 0.02801  | 0.26342  | 0.50008  | 0.5232   | 0.69757  | 0.49905  | 0.60862  | 0.52264  | 0.43354  | 0.31228  | 0.62364  | 0.18734  | 0.00643  | -0.26344 | -0.38018 | -0.41911 |
| PFL2225w      | 1.22597  | 0.57101  | -0.69075 | -1.15551 | -1.84694 | -2.15049 | -2.79106 | -3.03225 | -2.99524 | -3.57771 | -3.33024 | -3.4012  | -3.46722 | -3.74357 | -2.96296 | -1.95331 | -1.28066 | 0.08919  | 0.99128  | 1.38494  | 1.00638  | 0.82503  | 1.34851  | 1.00322  |
| PF14 0261     | -0.3475  | 0.30645  | 0.55774  | 0.60566  | 0.7713   | 0.58509  | 0.37848  | 0.3712   | 0.35117  | 0.49177  | 0.47458  | 0.60565  | 0.46963  | 0.2275   | 0.02576  | -0.29494 | -0.77451 | -0.71518 | -1.1834  | -1.57543 | -1.5417  | -1.08337 | -0.98042 | -0.61156 |
| PF14 0175     | 0.48341  | 0.34002  | 0.80627  | 0.56778  | 0.45843  | 0.61463  | 0.65     | 0.1838   | 0.48136  | 0.47215  | -0.0184  | -0.03399 | 0.11407  | 0.44944  | -0.00219 | -0.18143 | 0.12157  | -0.02976 | -0.70906 | 0.07205  | 0.06642  | 0.22802  | 0.23598  | 0.34524  |
| PF1295c       | -0.40939 | -0.36237 | -0.08701 | 0.01267  | -0.11388 | -0.08013 | -0.32204 | -0.5825  | -0.87089 | -1.21881 | -0.5309  | -0.37454 | -0.13866 | 0.44547  | 0.84465  | 0.88227  | 0.45831  | 0.66301  | 0.46403  | 0.16393  | -0.39051 | -0.26844 | -0.56705 | -0.32783 |
| PFE0550w      | 0.32291  | 0.62982  | 0.67174  | 1.28038  | 1.42406  | 1.43333  | 1.33006  | 1.23391  | 0.87008  | 0.51781  | 0.42654  | 0.31     | 0.0477   | -0.12869 | -0.08162 | -0.0947  | -0.05828 | 0.28448  | 0.57114  | 0.46742  | 0.39595  | 0.40737  | 0.62191  | 0.67091  |
| PFE0520c      | -0.37613 | -0.53794 | -0.37641 | -0.48654 | -0.41276 | -0.30163 | -0.14196 | -0.07156 | 0.05156  | -0.02086 | -0.06918 | 0.11418  | 0.17366  | 0.38104  | 0.48762  | 0.41602  | 0.38137  | 0.48064  | -0.16187 | 0.00979  | -0.00107 | -0.25933 | -0.32997 | -0.21921 |
| PFL1480w      | 0.06467  | 0.13357  | 0.05593  | 0.23615  | 0.27546  | 0.15691  | -0.09134 | -0.05217 | -0.33994 | -0.26409 | -0.13153 | -0.08945 | 0.08366  | -0.00787 | 0.18722  | 0.22217  | -0.35191 | -0.09368 | -0.03165 | -0.14727 | 0.01909  | -0.02517 | 0.06267  | 0.00274  |
| PF13 0361     | -0.9273  | -0.87303 | -0.54353 | -0.96466 | -0.76632 | -0.51781 | -0.52134 | -0.21257 | -0.11762 | 0.01663  | -0.0113  | 0.1772   | 0.52301  | 0.6715   | 0.76547  | 0.50744  | 0.43855  | 0.27496  | -0.2446  | -0.15432 | -0.49219 | -0.5768  | -0.67493 | -0.59167 |
| PF10 0248     | 0.76432  | 0.13875  | -0.28936 | -0.39195 | -0.52955 | -0.91424 | -1.02612 | -1.20515 | -1.48776 | -1.44649 | -1.47204 | -1.45508 | -1.40867 | -1.1865  | -0.74255 | -0.14139 | 0.76911  | 0.97777  | 1.11666  | 1.40706  | 1.26102  | 0.85496  | 0.81707  | 0.264    |
| PF14 0028     | -0.07166 | 0.403    | 0.79239  | 0.82779  | 0.77635  | 0.92638  | 0.78401  | 0.86956  | 0.8328   | 0.77338  | 0.81438  | 0.6968   | 0.58669  | 0.22898  | 0.13981  | -0.04996 | -0.2252  | -0.22902 | -0.4588  | -0.55926 | -0.55337 | -0.32507 | -0.34216 | -0.16054 |
| PFE0815w      | 0.43892  | 0.75411  | 0.6078   | 1.04952  | 1.29148  | 1.12886  | 1.08938  | 1.38821  | 0.97887  | 0.90486  | 0.86593  | 0.60475  | 0.29064  | 0.03603  | -0.07254 | -0.1618  | -0.5465  | -0.17814 | 0.01253  | -0.01673 | 0.02543  | 0.06994  | 0.00519  | 0.03802  |
| PF13 0101     | -0.69353 | -0.65774 | -0.03877 | -0.06385 | 0.38168  | 0.78941  | 1.05571  | 1.07943  | 1.30407  | 1.05642  | 0.78325  | 0.61764  | 0.56743  | 0.54036  | 0.22567  | 0.07152  | 0.20534  | -0.05436 | -0.35049 | -0.15567 | -0.25775 | -0.28652 | -0.22877 | -0.21029 |
| MAL8P1.11     | 0.0729   | -0.13003 | 0.03347  | 0.05597  | 0.11211  | 0.20066  | 0.32076  | 0.09877  | 0.27534  | 0.35198  | 0.24283  | 0.26856  | 0.34597  | 0.32542  | 0.43787  | 0.30231  | 0.42538  | 0.32399  | 0.20939  | 0.2386   | 0.25463  | 0.12528  | 0.04006  | -0.01425 |
| PFC10 API0018 | -0.22717 | -0.40914 | -1.03574 | -1.33558 | -1.15119 | -1.56439 | -1.79341 | -1.14837 | -1.72893 | -1.63112 | -1.59806 | -1.38163 | -1.09759 | -0.60098 | 0.61067  | 0.66122  | 0.65444  | 0.83147  | 0.16267  | 0        | 0.14826  | 0.45325  | -0.43026 | -0.61392 |
| PF14 0209     | -0.00255 | 0.19017  | 0.75934  | 0.52655  | 0.58592  | 0.84304  | 0.87292  | 0.7157   | 1.01939  | 0.89649  | 1.01424  | 1.14076  | 0.87208  | 0.6388   | 0.33259  | 0.08408  | -0.4028  | -0.14201 | -0.62496 | -0.9171  | -0.94891 | -0.70424 | -0.47858 | -0.37159 |
| PF13 0248     | 0.53023  | 0.61694  | 0.40921  | 0.8746   | 0.94803  | 0.83077  | 0.77215  | 0.49943  | -0.08559 | -0.00038 | 0.09863  | -0.11847 | -0.00514 | -0.1689  | -0.18236 | -0.12261 | -0.11047 | 0.18697  | 0.81185  | 0.68234  | 1.03057  | 0.88795  | 1.14631  | 1.15904  |
| PFL0960w      | -0.61254 | -0.32589 | 0.01932  | -0.2342  | 0.09499  | 0.40929  | 0.47755  | 0.75777  | 0.52813  | 0.47667  | 0.59115  | 0.70924  | 0.61264  | 0.30811  | 0.46861  | 0.43286  | -0.07781 | 0.13296  | 0.34941  | -0.18274 | -0.39871 | -0.53889 | -0.46916 | -0.36122 |
| MAL13P1.326   | 0.75834  | 1.07391  | 1.39841  | 1.63582  | 1.55663  | 1.77154  | 1.39207  | 1.14681  | 1.28153  | 1.0134   | 0.85986  | 0.92722  | 0.9969   | 0.90469  | 0.64969  | 0.56971  | 0.28748  | 0.12118  | -0.14853 |          |          |          |          |          |

|             |          |          |          |          |          |          |          |          |          |          |          |          |          |          |          |          |          |          |          |          |          |          |          |          |
|-------------|----------|----------|----------|----------|----------|----------|----------|----------|----------|----------|----------|----------|----------|----------|----------|----------|----------|----------|----------|----------|----------|----------|----------|----------|
| PF13 0047   | -0.71082 | -0.74744 | -0.9697  | -0.96631 | -1.01752 | -1.14116 | -0.83151 | -0.76364 | -0.51404 | 0.17813  | 0.00402  | 0.24302  | 0.1902   | 0.48189  | 0.37524  | 0.30599  | 0.56913  | 0.44547  | -0.16769 | 0.11624  | 0.07417  | -0.29782 | -0.33209 | -0.43442 |
| PFF0220w    | 0.28363  | 0.39892  | 0.29044  | 0.18541  | 0.15792  | -0.23296 | -0.14506 | 0.00508  | -0.20673 | -0.12521 | -0.25375 | -0.11103 | 0.00883  | 0.24778  | -0.27716 | -0.18885 | -0.03838 | -0.13141 | -1.15557 | -0.34804 | -0.18457 | 0.02418  | -0.08818 | -0.01596 |
| PFL1565w    | -0.14219 | -0.10772 | -0.03187 | 0.01311  | 0.48501  | 0.95295  | 1.04428  | 1.26825  | 1.38822  | 1.31727  | 1.35843  | 1.11329  | 0.83865  | 0.30047  | 0.05488  | -0.17718 | -0.37388 | -0.34881 | -0.37581 | -0.31115 | -0.27248 | -0.21967 | -0.13953 | -0.10177 |
| PFL0205w    | -0.27134 | -0.03297 | -0.15535 | -0.13838 | 0.22025  | 0.06391  | 0.02853  | 0.31068  | 0.40827  | 0.5496   | 0.45407  | 0.543    | 0.38947  | 0.28666  | 0.19165  | 0.14311  | 0.01076  | 0.30097  | 0.13383  | 0.43613  | 0.24543  | 0.63771  | 0.48839  | 0.60645  |
| PF14 0547   | 0.45681  | 0.60215  | 0.49462  | 0.72744  | 0.89529  | 0.4145   | 0.19876  | 0.22031  | -0.01062 | -0.16847 | -0.17329 | -0.06553 | 0.1618   | 0.46212  | 0.54934  | 0.51236  | 0.45649  | 0.49029  | -0.03171 | 0.36529  | 0.15734  | -0.15015 | -0.24439 | -0.37972 |
| MAL8P1.136  | -0.26296 | -0.13314 | -0.47772 | 0.22198  | -0.29874 | -0.59288 | 0.24592  | 0.3082   | 0.07786  | 0.08466  | 0.05959  | -0.21624 | -0.36308 | -0.49308 | -0.79067 | -1.92066 | -1.21222 | -1.0593  | -1.37479 | -1.54078 | -1.37988 | -1.17697 | -0.95045 |          |
| PFL1565w    | -0.35822 | -1.10038 | -1.37718 | -1.86445 | -2.38523 | -2.71432 | -2.77048 | -3.09985 | -3.19647 | -3.01264 | -2.6964  | -1.89666 | -1.60882 | -1.16999 | -0.21098 | 0.0888   | 0.25119  | 0.27861  | 1.27734  | 1.21116  | 0.34132  | 0.2819   | 0.56524  | 0.4385   |
| PFE0905w    | -1.06231 | -0.97395 | -0.70419 | -0.75322 | -0.41894 | 0.18417  | 0.4827   | 0.59729  | 0.88774  | 0.86032  | 0.80433  | 0.79971  | 0.72346  | 0.65419  | 0.40126  | 0.19525  | 0.18417  | 0.09825  | -0.19313 | -0.23075 | -0.21143 | -0.621   | -0.68045 | -0.70099 |
| PF11 0304   | 0.2877   | 0.0372   | -0.85206 | -0.59675 | -0.99812 | -1.30934 | -1.55119 | -1.85689 | -1.99476 | -2.25826 | -2.29478 | -2.52043 | -2.27258 | -1.68186 | -0.55323 | 0.42759  | 1.22683  | 0.93155  | 1.35002  | 1.38764  | 1.37777  | 1.016    | 0.83966  | 0.13875  |
| PFE0110w    | -0.0829  | 0.05816  | 0.22435  | 0.22997  | 0.16409  | 0.37439  | 0.42826  | 0.47625  | 0.42678  | 0.41823  | 0.50904  | 0.45079  | 0.33945  | 0.18096  | 0.22572  | 0.21791  | -0.04539 | 0.19776  | 0.17734  | -0.13508 | -0.40469 | -0.36288 | -0.42729 | -0.353   |
| PF10 0406   | 0.71375  | 1.27961  | 1.57899  | 0.26228  | 0.39244  | 0.38849  | 0.51376  | 0.19616  | 0.80726  | 0.74852  | 0.52643  | 0.71509  | 0.58295  | 0.49918  | 0.33228  | 0.30944  | -0.07128 | 0.01079  | -0.2878  | 0.07498  | -0.08666 | -0.45268 | 0.09875  | 0.10613  |
| PF14 0323   | -1.16901 | -0.8116  | -0.68476 | -1.10527 | -1.2834  | -1.05543 | -1.13583 | -1.01267 | -1.07463 | -1.18285 | -0.60007 | -0.25218 | -0.0679  | -0.11627 | 0.46125  | 0.86819  | 0.36128  | 0.66084  | 0.537    | -0.13993 | -0.34485 | -0.62489 | -0.97508 | -1.20797 |
| PFB0355c    | -0.8013  | -0.30936 | 0.60309  | -0.41548 | -0.4893  | -0.62325 | -0.63379 | -0.86086 | -0.70884 | -0.66768 | -0.61296 | -0.36671 | 0.12525  | 0.15672  | 0.63494  | 0.78961  | 0.78103  | 0.61164  | 0.52166  | 0.37285  | 0.09837  | -0.03024 | -0.37087 | -0.27582 |
| PF14 0652   | 0.73565  | -0.04738 | -0.09579 | -0.51237 | -0.87607 | -1.0769  | -1.47075 | -1.70145 | -2.05931 | -2.63182 | -2.70893 | -2.90453 | -2.91127 | -3.14203 | -2.57748 | -1.96136 | -0.29697 | 0.21939  | 1.51847  | 1.22854  | 1.15788  | 1.01026  | 1.30632  | 1.05531  |
| MAL13P1.137 | -0.60617 | -0.72596 | -0.76284 | -0.99631 | -1.14276 | -1.24137 | -1.43535 | -1.52702 | -1.93347 | -1.90323 | -1.69748 | -1.48922 | -0.75208 | -0.06538 | 0.43004  | 0.74161  | 1.20737  | 0.91199  | 0.35376  | 0.82494  | 0.67162  | 0.34065  | -0.03605 | -0.49337 |
| MAL13P1.155 | 0.05836  | 0.48114  | 0.53573  | 0.69395  | 0.75141  | 0.77421  | 0.7635   | 0.86228  | 0.77816  | 0.85921  | 0.89648  | 0.65909  | 0.43896  | 0.38032  | 0.07367  | -0.29755 | -0.43647 | -0.69632 | -1.06322 | -0.97221 | -0.81673 | -0.53464 | -0.31372 | 0.06106  |
| PFC0865w    | 0.40773  | 0.93363  | 0.86076  | 0.88605  | 0.86124  | 1.01244  | 0.86464  | 0.79829  | 0.86658  | 0.82402  | 0.83231  | 1.09528  | 0.88088  | 0.86148  | 0.7263   | 0.51303  | -0.07336 | 0.28761  | -0.20799 | -0.34158 | -0.39844 | -0.06947 | 0.05854  | 0.30823  |
| MAL7P1.32   | -0.50152 | -0.03524 | 0.37358  | 0.28848  | 0.56732  | 0.70462  | 0.84402  | 0.82094  | 0.75584  | 0.75948  | 0.70719  | 0.63375  | 0.50942  | 0.21668  | 0.25341  | 0.1031   | 0.02304  | -0.26842 | -0.25012 | -0.49762 | -0.60236 | -0.58651 | -0.54059 | -0.32672 |
| PFE1180c    | -0.01659 | -0.46617 | 0.68237  | -0.29544 | -0.14964 | 0.03102  | 0.23284  | 0.20954  | 0.79118  | 0.89566  | 0.84689  | 0.91744  | 0.75089  | 0.70474  | 0.31499  | 0.10488  | -0.01799 | -0.19576 | -0.10829 | -0.16488 | -0.16786 | -0.14826 | -0.06925 | -0.01148 |
| MAL13P1.52  | 0.80817  | 0.5654   | 0.30786  | 1.21935  | 1.08695  | 1.24324  | 1.19403  | 1.13352  | 1.05368  | 1.115    | 0.86223  | 0.78247  | 0.61895  | 0.42753  | 0.16113  | -0.06713 | -0.38469 | -0.35727 | -0.3659  | -0.40463 | -0.32972 | -0.22424 | -0.10755 | 0.05482  |
| PFI0815c    | 1.2193   | 1.28788  | 1.86331  | 1.49385  | 1.43807  | 1.51096  | 1.20272  | 1.21383  | 1.48662  | 1.24298  | 1.18897  | 1.23168  | 0.6868   | 0.41403  | 0.1735   | -0.03484 | -0.10241 | -0.41631 | -0.4301  | -0.24823 | -0.20602 | 0.05213  | 0.13469  | 0.32211  |
| PFC0455w    | 0.18006  | -0.24264 | -1.29387 | -0.35277 | -0.48096 | -0.39095 | -0.32216 | -0.21682 | -0.39688 | -0.08924 | -0.02508 | 0.05145  | 0.14978  | 0.30617  | 0.39737  | 0.60273  | 0.44858  | 0.71111  | 0.88037  | 0.71361  | 0.45781  | 0.23332  | 0.30687  | -0.01417 |
| PFF1280w    | 0.34106  | -0.31906 | -0.21712 | -0.26696 | -0.2406  | -0.40186 | -0.58814 | -0.83492 | -0.92728 | -0.60616 | -0.37384 | -0.2195  | 0.06641  | 0.11059  | 0.14734  | 0.34886  | 0.61067  | 0.62147  | 1.04404  | 0.51617  | 0.82239  | 0.45386  | 0.56528  | 0.30721  |
| PF14 0336   | -0.41818 | 0.05456  | 0.09331  | 0.11481  | 0.14129  | 0.0134   | 0.07456  | 0.18313  | -0.07811 | -0.13813 | 0.00461  | 0.01204  | 0.16848  | 0.08256  | 0.49646  | 0.35748  | 0.02239  | 0.04589  | -0.17159 | -0.35886 | -0.51053 | -0.55031 | -0.50515 | -0.55053 |
| PF10 0165   | -0.81726 | -1.13103 | -1.42091 | -1.23716 | -1.18835 | -1.40392 | -1.11266 | -0.88381 | -0.10503 | 0.34062  | 0.60954  | 0.8452   | 0.88492  | 0.85126  | 0.63445  | 0.45272  | 0.196    | 0.10007  | 0.27958  | -0.15931 | -0.27668 | -0.53367 | -0.42355 | -0.35352 |
| FFF1350c    | -0.04831 | 0.00219  | -0.08883 | 0.13247  | 0.19609  | 0.18479  | 0.251    | 0.52307  | 0.49166  | 0.46417  | 0.53214  | 0.55709  | 0.3243   | 0.34983  | 0.2117   | 0.09846  | -0.27681 | -0.40698 | -0.31943 | -0.43171 | -0.3693  | -0.37239 | -0.25045 | 0.05668  |
| PF14 0068   | 0.75605  | 0.87304  | 0.74995  | 0.93042  | 0.92183  | 1.14529  | 1.00951  | 1.24133  | 1.25994  | 0.92066  | 0.88709  | 0.62444  | 0.56098  | 0.08005  | -0.07262 | -0.18086 | -0.539   | -0.30442 | -0.43429 | -0.53224 | -0.40602 | 0.40172  | 0.43308  | 0.47101  |
| PFI0280c    | -0.32027 | -0.1265  | -0.31838 | -0.3948  | -0.08446 | -0.01652 | 0.01277  | 0.37967  | 0.41041  | 0.2113   | 0.38322  | 0.13931  | 0.25197  | 0.10172  | 0.27637  | 0.29751  | 0.07553  | 0.05718  | 0.34256  | -0.0349  | -0.15903 | -0.24587 | -0.38694 | -0.15769 |
| PFL0915c    | 0.20662  | -0.08527 | 0.69356  | 0.91651  | 1.14171  | 0.73717  | 0.91519  | 1.02113  | 0.47411  | 0.4174   | 0.49356  | 0.31807  | 0.17097  | 0.09595  | 0.21742  | 0.07052  | 0.26703  | -0.00362 | 0.32495  | 0.07793  | 0.36469  | 0.36626  | 0.58841  | 0.98568  |
| PFC0515c    | -0.11325 | 0.05732  | -0.4483  | 0.1754   | 0.21942  | 0.31844  | 0.36498  | 0.18536  | 0.00262  | -0.153   | -0.12791 | -0.07707 | 0.15662  | 0.11156  | 0.33459  | 0.33024  | 0.64328  | 0.27763  | 0.22329  | 0.32545  | 0.37503  | 0.43977  | 0.49765  | 0.33665  |
| PFF1270c    | 0.9453   | 0.96256  | 0.7084   | 1.80944  | 1.76388  | 1.92247  | 1.60402  | 1.66302  | 1.45514  | 1.11667  | 0.94427  | 0.63445  | 0.70004  | 0.43898  | 0.15724  | 0.07082  | -0.44586 | -0.11124 | -0.23663 | -0.48837 | -0.40706 | -0.19145 | 0.16635  | 0.52472  |
| PFF0290w    | 1.10241  | 0.75563  | 0.33841  | 1.05914  | 1.0259   | 0.3012   | -0.39245 | -0.7414  | -1.37944 | -1.63489 | -1.59116 | -2.04485 | -2.19444 | -1.92545 | -1.95404 | -2.10496 | -1.90524 | -0.26109 | 0.68878  | 0.95537  | 0.61343  | 1.26917  | 1.58348  |          |
| PFE1020w    | -0.60246 | 0.0534   | 0.19238  | 0.09256  | 0.20903  | 0.18312  | 0.17716  | 0.39712  | 0.31048  | 0.47867  | 0.82123  | 0.72767  | 0.67853  | 0.30377  | 0.55     | 0.2029   | -0.06918 | -0.3172  | -0.43188 | -1.06668 | -1.04243 | -0.10732 | -0.97809 | -0.64594 |
| PF13 0280   | -0.67044 | -0.52196 | -0.58964 | -0.61755 | -0.45593 | -0.22338 | -0.27598 | -0.33355 | -0.55526 | -0.47014 | -0.45809 | -0.35317 | -0.20656 | -0.20709 | 0.17431  | 0.30295  | 0.43565  | 0.44168  | 0.43425  | 0.12616  | -0.24303 | -0.51622 | -0.57396 | -0.66142 |
| PFC0360w    | -1.29332 | -0.58017 | -0.55348 | 0.27138  | 0.57476  | 0.20139  | -0.02282 | 0.36351  | 0.34912  | 0.42932  | 0.76772  | 0.70327  | 0.45717  | -0.02801 | -0.19926 | -0.64994 | -1.47145 | -1.36937 | -1.48284 | -1.47787 | -1.07319 | -1.03873 | 0.25138  | 0.99235  |
| PFB0285c    | 0.87172  | 0.77895  | 0.58337  | 0.84405  | 0.72425  | 0.74195  | 0.75922  | 0.64724  | 0.65002  | 0.39009  | 0.3078   | 0.40433  | 0.17529  | 0.21649  | -0.00576 | -0.3105  | -0.44084 | -0.54526 | -0.66932 | -0.28687 | 0.00051  | 0.34032  | 0.50188  | 0.63542  |
| PFL2250c    | 0.0244   | -0.25266 | -0.02767 | -0.03776 | -0.31033 | -0.22637 | -0.19078 | -0.16774 | 0.01786  | 0.29265  | 0.43771  | 0.47431  | 0.46841  | 0.46284  | 0.4531   | 0.36239  | 0.34287  | 0.19798  | 0.41527  | 0.12602  | 0.03682  | -0.01885 | -0.02496 | 0.12613  |
| PF14 0273   | -0.0651  | 0.32283  | 0.80274  | 1.07412  | 1.24523  | 1.37231  | 1.5605   | 1.37905  | 1.30227  | 1.08683  | 0.86556  | 0.67472  | 0.54869  | 0.46747  | 0.12083  | -0.14591 | -0.21673 | -0.46016 | -0.83018 | -0.78927 | -0.76427 | -0.66168 | -0.6789  | -0.35686 |
| PF14 0272   | 0.89379  | 0.95683  | 0.53482  | 1.08428  | 1.28742  | 1.15837  | 0.84974  | 1.1883   | 0.77999  | 0.49161  | 0.35341  | 0.14822  | 0.09672  | 0.02681  | -0.03344 | 0.02208  | -0.25891 | 0.12965  | 0.32588  | 0.15469  | 0.39368  | 0.61887  | 0.55638  | 0.74586  |
| MAL0215a    | 1.54992  | 1.89918  | 1.86838  | 2.17717  | 1.92054  | 1.361    | 1.66078  | 1.63192  | 1.35578  | 0.61263  | 0.66686  | 0.34863  | 0.16672  | -0.19731 | -0.35435 | -0.43966 | -0.30963 | -0.43738 | -0.04027 | -0.5497  | -0.23936 | 0.42845  | 0.74554  | 1.03479  |
| PF08 0113   | 0.75691  | 0.2905   | 0.14398  | 0.08506  | -0.07144 | -0.28722 | -0.45162 | -0.37026 | -0.62623 | -0.67362 | -0.63145 | -0.79291 | -0.7152  | -0.88088 | -0.6806  | -0.54783 | -0.10902 | -0.37545 | 0.36269  | 0.47368  | 0.4367   |          |          |          |

|                       |          |          |          |          |          |          |          |          |          |          |          |          |          |          |          |          |          |          |          |          |          |          |          |          |
|-----------------------|----------|----------|----------|----------|----------|----------|----------|----------|----------|----------|----------|----------|----------|----------|----------|----------|----------|----------|----------|----------|----------|----------|----------|----------|
| PF11 0227             | 0.02321  | -0.38993 | -0.48064 | -0.76475 | -1.19838 | -1.13757 | -1.40477 | -1.47852 | -1.65506 | -1.50074 | -1.17759 | -0.68037 | -0.28991 | 0.24904  | 0.79968  | 1.02558  | 0.67203  | 1.03473  | 1.04344  | 0.76477  | 0.44855  | -0.22738 | -0.5769  | -0.92664 |
| PF14 0450             | 0.2516   | 0.59041  | 0.58973  | 0.82121  | 0.73044  | 0.68237  | 0.65442  | 0.62571  | 0.48637  | 0.3165   | 0.13094  | -0.11888 | -0.17839 | 0.0035   | -0.12393 | -0.32427 | -0.39677 | -0.09118 | -0.70157 | -0.40533 | -0.49544 | -0.20689 | 0.00716  | 0.16158  |
| PF07 0079             | -1.1892  | -0.06443 | 0.27916  | 0.35712  | 0.47692  | 0.67037  | 0.98577  | 0.7795   | 0.76468  | 0.56369  | 0.67292  | 0.46416  | 0.27888  | 0.11039  | 0.25947  | -0.14262 | -0.5193  | -0.97976 | -1.28565 | -2.26808 | -2.10795 | -1.62474 | -1.62259 | -1.19739 |
| PFE0995c              | -0.50041 | -0.01627 | 0.34752  | 0.39154  | 0.4581   | 0.82062  | 0.79031  | 0.50732  | 0.70159  | 0.63753  | 0.58489  | 0.49441  | 0.58511  | 0.33513  | 0.07611  | -0.28344 | -0.50744 | -0.83388 | -1.11196 | -1.13872 | -1.12572 | -0.6898  | -0.37051 | -0.23356 |
| PFA0520c              | -1.13653 | -1.17938 | -1.35859 | -1.41491 | -1.51127 | -1.70056 | -1.58622 | -1.07618 | -0.3552  | 0.37829  | 1.02858  | 1.11939  | 1.08374  | 0.80509  | 0.48506  | 0.16046  | -0.59317 | -0.46054 | -0.63679 | -0.77819 | -0.8274  | -0.80655 | -0.75599 | -0.66019 |
| PF11 0196             | 0.59097  | 0.59338  | 0.76517  | 0.63486  | 0.52714  | 0.60409  | 0.53914  | 0.5776   | 0.38129  | 0.31177  | 0.29845  | 0.25003  | 0.13611  | 0.07052  | 0.00827  | -0.0139  | -0.35672 | 0.18958  | 0.05684  | -0.02811 | 0.24868  | 0.44589  | 0.37596  | 0.40728  |
| PF10 0195             | 0.57587  | 0.706    | 0.54407  | 0.41023  | 0.57131  | 0.50751  | 0.54087  | 0.0098   | 0.1657   | -0.16658 | -0.18429 | -0.07996 | -0.32361 | -0.35156 | -0.24472 | -0.10938 | 0.35589  | 0.43897  | 0.72872  | 0.85116  | -1.11887 | 1.09666  | 1.20106  | 0.98096  |
| MAL13P1.93            | 0.72994  | 1.31649  | 1.1619   | 1.4095   | 1.32531  | 1.27052  | 1.09539  | 1.2921   | 1.20859  | 1.12272  | 0.90317  | 0.59987  | 0.24973  | -0.072   | -0.35108 | -0.38994 | -0.8026  | -1.2722  | -0.74427 | -1.02088 | -0.64234 | -0.1524  | 0.1023   | 0.42829  |
| PFL0640w              | -0.23819 | 0.06158  | -0.4223  | 0.21613  | 0.01466  | -0.26434 | 0.20365  | 0.43017  | 0.59139  | 0.6315   | 0.98081  | 0.94848  | 0.60486  | 0.33126  | 0.55295  | 0.26869  | -0.08333 | 0.18423  | 0.05289  | -0.55144 | -0.64971 | -0.61186 | -0.76972 | -0.43824 |
| PF10_API0002:r<br>RNA | 0.39042  | 0.13339  | -0.31881 | -0.33787 | -0.80869 | -0.80089 | -1.35128 | -0.97123 | -0.79525 | -1.1483  | -1.2704  | -0.99872 | -1.02151 | -0.64848 | -0.5461  | -0.13181 | 0.10787  | 0.57343  | 0.19406  | 0.34193  | 0.01049  | 0.54357  | 0.76834  | 0.53883  |
| MAL13P1.30            | 0.00933  | -0.04397 | -0.09247 | -0.49585 | -0.46856 | -0.68755 | -0.53822 | -0.41793 | -0.12675 | 0.0613   | 0.38434  | 0.46701  | 0.47813  | 0.59293  | 0.8603   | 0.9356   | 0.48977  | 0.84436  | 0.77047  | 0.72881  | 0.62285  | 0.13028  | 0.10378  | -0.01767 |
| PF1355w               | 0.22106  | 0.35556  | 0.60406  | 0.89856  | 0.78534  | 0.7015   | 0.48705  | 0.67316  | 0.74566  | 0.44285  | 0.56127  | 0.63788  | 0.42606  | -0.073   | -0.01115 | 0.18053  | -0.49575 | 0.11858  | 0.47421  | -0.14585 | -0.26269 | -0.03322 | 0.24302  | 0.28774  |
| PFB0125c              | -0.88375 | -0.53653 | -0.54101 | -0.18879 | 0.15092  | 0.35366  | 0.18275  | 0.2356   | 0.13983  | 0.24996  | 0.26265  | 0.10624  | 0.28913  | 0.50098  | 0.44624  | 0.3427   | 0.27063  | 0.06913  | -0.40976 | -0.38507 | -0.2216  | -0.50559 | -0.60752 | -0.61432 |
| MAL13P1.76            | 0.1112   | 0.38808  | 0.72348  | 0.7036   | 0.77056  | 0.85827  | 0.71935  | 0.77676  | 0.71673  | 0.76911  | 0.85645  | 0.72945  | 0.61218  | 0.38818  | 0.35408  | 0.106    | -0.28982 | -0.30608 | -0.61217 | -0.67946 | -0.87083 | -0.75889 | -0.5668  | -0.14356 |
| PFA0420w              | 1.65073  | 2.09066  | 2.28978  | 2.0113   | 2.0244   | 0.92637  | 0.09772  | -0.46317 | -1.8024  | -2.00823 | -1.99965 | -2.5112  | -3.10879 | -3.74255 | -3.46453 | -3.85325 | -3.45711 | -2.98448 | -1.627   | 0.40874  | 0.93121  | 0.70526  | 1.63424  | 1.77444  |
| MAL7P1.152            | -0.30472 | -0.39569 | -0.24751 | 0.59852  | 0.31373  | 0.58552  | 0.77001  | 0.91841  | 0.98551  | 1.01253  | 0.98105  | 0.82386  | 0.44453  | 0.36566  | 0.22234  | 0.0862   | -0.03324 | -0.19408 | -0.38871 | -0.19923 | -0.44869 | -0.4489  | -0.45294 | -0.36292 |
| PFB0775w              | 0.40201  | 0.47629  | 0.24584  | 0.30248  | 0.29869  | 0.38982  | 0.32235  | 0.00696  | -0.50674 | 0.07522  | 0.11963  | 0.13213  | 0.09956  | 0.10142  | 0.21446  | 0.3516   | 0.49688  | 0.71267  | 0.66608  | 0.74594  | 0.71759  | 0.35739  | 0.41041  | 0.44344  |
| PFD0930w              | -0.13975 | 0.00693  | 0.13444  | -0.22821 | -0.15623 | -0.18301 | -0.33325 | -0.07682 | -0.25853 | -0.31815 | -0.22076 | -0.25861 | -0.10769 | -0.33335 | -0.00436 | 0.21861  | 0.22092  | 0.20518  | 0.90341  | 0.37316  | 0.30166  | 0.25918  | 0.14703  | 0.14574  |
| PFL0125c              | 0.74155  | 0.96393  | 0.99241  | 1.07529  | 0.75546  | 0.94303  | 0.74328  | 0.74566  | 0.7251   | 0.62963  | 0.57674  | 0.45229  | 0.36916  | 0.04131  | -0.23204 | -0.32606 | -1.37641 | -0.28413 | -0.05329 | 0.34436  | 0.53397  | 0.39613  | 0.68322  | 0.82651  |
| PF13 0180             | -0.5528  | -0.53128 | -0.36185 | -0.09774 | -0.00514 | 0.09367  | 0.04094  | 0.20892  | 0.15827  | 0.5023   | 0.88255  | 0.87277  | 0.70257  | 0.2863   | 0.08872  | -0.35393 | -0.20831 | -0.65444 | -0.7853  | -0.86731 | -0.81761 | -0.78355 | -0.59591 |          |
| PFF1410c              | 0.00084  | 0.1444   | -0.14595 | -0.35952 | -0.5932  | -0.71154 | -0.70082 | -0.37358 | 0.10388  | 0.39811  | 0.7193   | 0.75765  | 0.73689  | 0.59411  | 0.54639  | 0.31315  | -0.2038  | -0.19431 | -0.3852  | -0.51101 | -0.58634 | -0.51188 | -0.47948 | -0.36483 |
| PF11 0047             | 0.4845   | 0.77179  | 0.90001  | 1.56198  | 1.35891  | 1.7286   | 1.54661  | 1.57685  | 1.06646  | 0.93399  | 0.94056  | 0.8864   | 0.77611  | 0.54066  | 0.42747  | 0.22443  | -0.31019 | -0.35885 | -0.34418 | -0.72771 | -0.91596 | -0.40955 | -0.19888 | -0.00152 |
| PFI0328c              | -0.00038 | 0.34035  | 1.00024  | 0.58123  | 0.77826  | 0.87253  | 0.809    | 0.67275  | 0.98315  | 1.1104   | 0.98715  | 0.87667  | 0.61284  | 0.29676  | 0.10358  | -0.16606 | -0.37857 | -0.63124 | -0.40618 | -0.68822 | -0.70767 | -0.56935 | -0.43618 | -0.09987 |
| PF10 0319             | -0.32605 | 0.06564  | 0.26261  | 1.04211  | 0.07733  | -0.1533  | -0.07582 | 0.10496  | -0.00156 | 0.09534  | 0.05386  | -0.07387 | -0.07783 | 0.02639  | 0.22374  | 0.08442  | 0.3281   | 0.02509  | -0.40847 | -0.17197 | -0.27918 | -0.25594 | -0.32062 | -0.26374 |
| PF13 0035             | 0.34637  | 0.78284  | 1.00296  | 0.82619  | 0.71643  | 0.64926  | 0.59453  | 0.70352  | 0.59068  | 0.60649  | 0.49788  | 0.49313  | 0.34012  | 0.02507  | -0.22843 | -0.48378 | -0.48507 | -0.87362 | -0.80339 | -0.75578 | -0.46815 | 0.06412  | 0.23624  | 0.40008  |
| PFI0190w              | 0.09566  | 0.52877  | 0.59789  | 0.70276  | 0.67895  | 0.80913  | 0.54657  | 0.78677  | 0.78614  | 0.57363  | 1.04974  | 0.97179  | 0.48415  | 0.27485  | 0.30611  | 0.0915   | -0.89482 | -0.2762  | -1.06862 | -1.28745 | -1.24057 | -0.90306 | -0.71107 | -0.54637 |
| PFB0180w              | -0.64884 | -0.73382 | -0.25472 | -0.86736 | -0.63848 | -0.36641 | 0.06938  | 0.44572  | 0.71349  | 0.89193  | 0.91314  | 1.07285  | 0.9946   | 0.95444  | 0.51494  | 0.42819  | 0.08082  | 0.15547  | -0.09096 | -0.2725  | -0.60446 | -0.51173 | -0.59914 | -0.56331 |
| MAL7P1.157            | -1.14611 | -1.14785 | -1.60589 | -1.18943 | -1.32756 | -1.30045 | -0.72485 | -0.37871 | 0.19017  | 0.58635  | 0.7852   | 1.08195  | 1.23868  | 1.0446   | 0.91826  | 0.70798  | 0.22733  | 0.07814  | -0.11193 | -0.60028 | -0.70923 | -0.67135 | -0.86522 | -0.94727 |
| PF08 0044             | 1.36881  | 1.27589  | 1.03793  | 1.47438  | 1.33639  | 1.1535   | 0.83533  | 0.6274   | 0.09225  | -0.17498 | -0.20061 | -0.26381 | -0.20642 | -0.26692 | -0.31037 | -0.46068 | -0.73003 | -0.62882 | -0.66555 | -0.12588 | 0.18768  | 0.42973  | 0.84786  | 0.73629  |
| PFE0695w              | 0.48972  | 0.41454  | 0.15931  | 0.10359  | 0.30749  | 0.15842  | -0.09809 | 0.40896  | 0.22095  | -0.11771 | 0.00323  | -0.0672  | -0.11127 | 0.1119   | 0.33451  | 0.26388  | 0.28033  | 0.50027  | 0.37339  | 0.18903  | 0.61028  | 0.26588  | 0.28857  |          |
| MAL7P1.37             | -0.81431 | -0.89819 | -1.35722 | -0.82322 | -0.44478 | -0.17311 | 0.10644  | 0.33209  | 0.47603  | 0.51236  | 0.4393   | 0.4193   | 0.76408  | 0.66912  | 0.38499  | 0.15061  | 0.21042  | -0.10045 | -0.32234 | -0.30609 | -0.54719 | -0.47302 | -0.54335 |          |
| PFL2160c              | -0.01971 | 0.04877  | -0.02463 | 0.10639  | 0.21508  | 0.32829  | 0.05863  | 0.1831   | 0.08333  | 0.00349  | 0.03995  | 0.09909  | 0.17583  | 0.13354  | 0.35023  | 0.32538  | 0.24769  | 0.25289  | 0.12576  | -0.02031 | -0.10921 | -0.01581 | -0.05994 | 0.09212  |
| PFI0110c              | 1.39112  | 1.49114  | 1.2191   | 1.16512  | 1.2405   | 1.49326  | 1.25677  | 0.76291  | 0.24814  | -0.54813 | -0.97897 | -1.52842 | -1.7889  | -1.98577 | -1.85096 | -1.70024 | -0.92186 | -1.07289 | -0.42233 | 0.18942  | 0.55449  | 0.92631  | 1.0581   | 1.16826  |
| PFL14 0604            | 1.41765  | 1.66182  | 1.22955  | 1.51768  | 1.57559  | 1.22946  | 0.8336   | 0.61552  | -0.07288 | -0.28596 | -0.12385 | -0.37624 | -0.28176 | -0.12132 | -0.05275 | -0.09086 | -0.52293 | -0.15097 | 0.20316  | 0.01463  | 0.4589   | 0.68131  | 0.92535  | 1.04713  |
| MAL8P1.41             | 0.67328  | 1.18854  | 0.97602  | 1.54065  | 1.40312  | 1.36673  | 1.11917  | 1.12897  | 1.03876  | 1.06787  | -1.8009  | 0.97479  | 0.44607  | -0.04833 | -0.22444 | -0.61923 | -1.44278 | -1.00537 | -0.10783 | -1.06012 | -0.71117 | -0.35675 | 0.22734  | 0.46304  |
| PF11 0230             | 0.96443  | 1.13552  | 1.11342  | 1.32867  | 1.29685  | 1.37945  | 1.28272  | 0.92591  | 0.4733   | 0.14636  | -0.0787  | -0.39778 | -0.568   | -0.58732 | -0.68393 | -0.55958 | -0.27547 | -0.56081 | -0.1148  | 0.11745  | 0.52495  | 0.49757  | 0.72982  | 0.83273  |
| PF11 0333             | -0.3472  | -0.62099 | -0.54745 | -0.64301 | -0.52117 | -0.28773 | -0.03485 | 0.1389   | 0.27287  | 0.31035  | 0.38452  | 0.41733  | 0.50553  | 0.641    | 0.52486  | 0.48305  | 0.42316  | 0.48591  | 0.14842  | 0.18478  | 0.0517   | -0.11001 | -0.29608 | -0.40545 |
| PF11 0365             | -0.54486 | -0.61289 | -0.57189 | -0.67269 | -0.64249 | -0.72244 | -0.71755 | -0.74013 | -0.4812  | -0.08161 | 0.14957  | 0.60218  | 0.73555  | 0.80507  | 0.78085  | 0.34472  | 0.52992  | 0.29432  | -0.04768 | -0.10142 | -0.29119 | -0.27056 | -0.17795 |          |
| PF14 0125             | 0.6304   | 1.01656  | 0.5658   | 1.15044  | 1.25612  | 1.21115  | 1.19539  | 1.34164  | 1.23189  | 1.21303  | 1.17604  | 0.88132  | 0.60246  | 0.12748  | -0.11031 | -0.49409 | -0.56709 | -0.72299 | -0.90648 | -0.98843 | -0.80556 | -0.3565  | 0.02151  | 0.36708  |
| PF08 0071             | -0.38168 | -0.51271 | -0.85616 | -0.43356 | -0.55578 | -0.46044 | -0.78631 | -0.3112  | -0.3271  | -0.41983 | -0.02241 | -0.08974 | -0.00543 | -0.1144  | 0.45704  | 0.55074  | 0.31927  | 0.1018   | 0.28419  | -0.60989 | -0.53277 | -0.12845 | -0.68749 | -0.76526 |
| PFD0160w              | 0.89371  | 0.82069  | 0.8226   | 0.53361  | 0.584    | 0.42855  | 0.27945  | -0.0316  | 0.10591  | 0.33555  | 0.08129  | 0.0975   | 0.15274  | 0.51314  | 0.057    | -0.02019 | -0.20089 | -0.06179 | -0.79409 | 0.05265  | 0.14209  | 0.2455   | 0.40484  |          |

|             |          |          |          |          |          |          |          |          |          |          |          |          |          |          |          |          |          |          |          |          |          |          |          |          |
|-------------|----------|----------|----------|----------|----------|----------|----------|----------|----------|----------|----------|----------|----------|----------|----------|----------|----------|----------|----------|----------|----------|----------|----------|----------|
| PF11 0295   | -1.14467 | -0.95458 | -0.93175 | -1.13063 | -0.91884 | -0.91799 | -0.56643 | -0.1699  | 0.06065  | 0.38788  | 0.77456  | 0.77552  | 0.9259   | 0.62125  | 0.65492  | 0.3557   | -0.08462 | -0.2187  | -0.62637 | -0.70242 | -0.97459 | -1.24906 | -1.11601 | -0.85582 |
| PF14 0295   | -0.16421 | -0.17054 | -0.63713 | -0.29987 | -0.44022 | -0.43794 | -0.57766 | -0.4101  | -0.54721 | -0.45978 | -0.16241 | 0.08399  | 0.36228  | 0.54623  | 0.80178  | 0.79779  | 0.43848  | 0.64556  | 0.7239   | 0.46325  | 0.35823  | -0.04442 | -0.10232 | -0.32499 |
| PF10305c    | -0.27358 | -0.03774 | 0.13323  | 0.01638  | 0.09368  | 0.17791  | 0.35291  | 0.21176  | 0.19219  | 0.13858  | 0.26156  | 0.22675  | 0.31165  | 0.28351  | 0.4746   | 0.45939  | 0.45662  | 0.23343  | 0.34317  | 0.10319  | -0.08117 | -0.06655 | -0.06074 | -0.03075 |
| PF13 0037   | 0.06317  | 0.57152  | 0.78063  | 0.81054  | 1.09224  | 1.27556  | 1.20446  | 1.05563  | 0.99544  | 0.93258  | 0.8111   | 0.67309  | 0.61585  | 0.40611  | 0.16528  | -0.0282  | -0.15723 | -0.27205 | -0.52583 | -0.57324 | -0.46875 | -0.34046 | -0.1473  | 0.1339   |
| PF14 0416   | -0.10443 | 0.1216   | 0.30065  | 0.24505  | 0.12534  | 0.31131  | 0.34216  | 0.36712  | 0.48219  | 0.38912  | 0.54429  | 0.51458  | 0.46036  | 0.42697  | 0.52666  | 0.45984  | 0.38228  | 0.35655  | 0.17359  | -0.12993 | -0.3109  | -0.2854  | -0.24688 | -0.03986 |
| PFE0830c    | -0.36847 | -0.54517 | -0.72542 | -0.57271 | -0.49961 | -0.36337 | -0.11525 | 0.06993  | 0.38174  | 0.48352  | 0.48706  | 0.5907   | 0.65679  | 0.76604  | 0.46403  | 0.3635   | 0.21835  | 0.34752  | -0.14576 | 0.17572  | -0.03981 | -0.26096 | -0.28063 | -0.41357 |
| MAL13P1.333 | -0.0473  | 0.13657  | 0.26046  | 0.24812  | 0.27146  | 0.17631  | 0.32653  | 0.27117  | 0.55576  | 0.55499  | 0.51785  | 0.51323  | 0.46771  | 0.56587  | -0.02214 | -0.19034 | -0.19055 | -0.29369 | -0.64381 | -0.32796 | -0.17263 | -0.23507 | -0.16803 | -0.08684 |
| PF14 0298   | 0.9147   | 0.0328   | -0.08296 | -0.18015 | -0.09938 | -0.38955 | -0.49524 | -0.61061 | -0.92199 | -0.75212 | -0.61595 | -0.63119 | -0.54703 | -0.36419 | -0.10253 | 0.27079  | 0.71999  | 0.75165  | 1.05755  | 0.89022  | 0.88143  | 0.70845  | 0.54102  | 0.16504  |
| PF14 0251   | 0.97371  | 0.95423  | 0.6329   | 0.66638  | 0.33945  | 0.1667   | -0.13678 | -0.63156 | -1.24354 | -1.34755 | -1.28595 | -1.07209 | -0.86865 | -0.37397 | 0.1851   | 0.68378  | 0.71328  | 0.6804   | 1.11913  | 0.73447  | 0.77607  | 0.7534   | 0.57232  | 0.36403  |
| PFL1380w    | -0.22329 | -0.54299 | -0.81242 | -1.00323 | -1.12903 | -1.02137 | -1.14736 | -0.57002 | -0.55429 | -0.10513 | 0.01135  | 0.19176  | 0.11141  | 0.04995  | 0.24165  | 0.37237  | 0.36781  | 0.43242  | 0.68925  | 0.61754  | 0.53798  | 0.24886  | 0.10541  | -0.31191 |
| MAL13P1.36  | 0.02812  | 0.34382  | 0.29917  | 0.28493  | 0.32976  | 0.36164  | 0.4093   | 0.51923  | 0.29516  | 0.53489  | 0.53482  | 0.51884  | 0.46225  | 0.37748  | 0.24126  | 0.01086  | -0.34932 | -0.31957 | -0.72589 | -0.67705 | -0.51904 | -0.43411 | -0.24081 | -0.02615 |
| PFD0255w    | 0.29207  | -0.35347 | -0.5006  | -0.59925 | -0.68772 | -0.85071 | -0.96559 | -0.94964 | -0.80655 | -1.02122 | -1.12349 | -0.8631  | -1.13638 | -1.11569 | -0.79456 | -0.11563 | 0.54656  | 0.69424  | 1.00186  | 0.91393  | 0.90606  | 0.63351  | 0.58751  | 0.13722  |
| PF10 0190   | -0.82531 | -0.61763 | -0.66935 | -0.73463 | -0.70408 | -0.77156 | -0.98387 | -1.19634 | -1.12335 | -0.87447 | -1.29993 | -1.13273 | -0.56949 | 0.08011  | 0.41394  | 0.31143  | 0.47905  | 0.73544  | -0.03199 | 0.31001  | 0.35042  | 0.01124  | 0.34366  | -0.41431 |
| PFC0405c    | 0.85065  | 0.09568  | 1.04134  | 1.09396  | 0.84316  | 0.51043  | 0.57751  | 0.39279  | 0.22375  | 0.22466  | 0.12931  | 0.21565  | 0.14777  | 0.12554  | 0.02659  | -0.17086 | -0.08301 | 0.02845  | -0.43987 | -0.03752 | 0.11525  | 0.31581  | 0.52975  | 0.79205  |
| PF0683c     | -0.61757 | -0.63347 | -0.51652 | -0.97359 | -1.06744 | -1.18529 | -1.31572 | -1.5807  | -1.69654 | -1.76593 | -1.81149 | -1.93431 | -1.56392 | -1.09269 | -0.20755 | 0.37051  | 1.10783  | 0.64227  | 0.47072  | 0.74766  | 0.69664  | 0.41037  | 0.12589  | -0.39301 |
| PFL1130c    | 0.11822  | 0.11473  | 0.46071  | 0.31808  | 0.36565  | 0.60902  | 0.70246  | 0.38018  | 0.57825  | 0.59641  | 0.40677  | 0.41061  | 0.41756  | 0.60887  | 0.29017  | 0.18266  | 0.32649  | 0.09188  | -0.36109 | -0.10677 | -0.0824  | -0.03862 | -0.27982 | -0.23005 |
| PF14 0614   | 0.77065  | 0.47372  | 0.20785  | -0.0234  | -0.05612 | -0.16578 | -0.08327 | -0.14621 | 0.0212   | 0.01299  | -0.20048 | -0.21013 | -0.43182 | -0.61379 | -1.03761 | -1.29447 | -1.3558  | -1.09475 | 0.14874  | 0.48983  | 0.72038  | 0.91055  | 0.95707  | 1.0739   |
| PFE1640w    | 1.06508  | 0.91067  | 0.90607  | 0.91316  | 1.24844  | 1.41753  | 1.18245  | 1.20021  | 0.38328  | 0.43     | 0.08601  | -0.16852 | -0.04332 | -0.15774 | -0.14875 | 0.0583   | 0.20131  | 0.42668  | 0.63102  | 0.24499  | 0.35581  | 0.80146  | 0.30397  | 0.19877  |
| PF11 0273   | 0.0764   | 0.05611  | 0.12409  | 0.29248  | 0.40408  | 0.37837  | 0.16815  | 0.3968   | 0.31661  | 0.07471  | -0.02449 | 0.1068   | -0.13246 | -0.03197 | 0.07792  | 0.37722  | 0.05442  | 0.45909  | 0.46427  | 0.41369  | 0.12152  | -0.09838 | 0.01787  | -0.15277 |
| PF11 0526   | 0.37946  | 0.69038  | 0.60427  | 0.65471  | 0.74118  | 0.73472  | 0.56415  | 0.72203  | 0.72031  | 0.7771   | 0.91541  | 0.74933  | 0.59973  | 0.3164   | 0.30256  | -0.05728 | -0.17509 | -0.20805 | -0.38801 | -0.62788 | -0.60733 | -0.72275 | -0.40803 | -0.01829 |
| PFI0750c    | -0.56881 | -0.45734 | -0.29127 | -0.16548 | -0.11974 | 0.29324  | 0.61114  | 0.91786  | 1.31747  | 1.33779  | 1.1749   | 1.10009  | 0.86463  | 0.58897  | 0.33232  | 0.07283  | -0.29857 | -0.30431 | -0.40033 | -0.49641 | -0.43837 | -0.45075 | -0.30495 | -0.25463 |
| PF0415c     | -0.33961 | -0.10221 | 0.6491   | -0.56272 | -0.32545 | -0.42079 | -0.43053 | -0.25936 | -0.46681 | -0.26494 | 0.12114  | 0.32722  | 0.52475  | 0.40669  | 0.4186   | 0.63959  | -0.05104 | 0.19134  | 0.61198  | 0.04686  | -0.02409 | -0.0929  | -0.0487  | -0.04026 |
| MAL7P1.700  | -1.07382 | -0.34467 | 0.09879  | 0.15389  | 0.21939  | 0.20497  | 0.32388  | 0.23608  | 0.10086  | 0.14495  | 0.11059  | 0.26573  | 0.15539  | 0.12649  | -0.24349 | -0.17403 | -0.34769 | -0.66409 | -1.20136 | -1.80562 | -1.85588 | -1.59458 | -1.51143 | -0.93047 |
| MAL7P1.77   | -2.32551 | -2.41571 | -2.35367 | -3.0872  | -3.03936 | -2.69661 | -2.13708 | -1.6151  | -1.20913 | -0.69941 | -0.36778 | 0.00658  | 0.64358  | 1.11627  | 0.89881  | 0.84305  | 0.54667  | 0.48451  | -0.17436 | -0.81725 | -1.24303 | -1.50237 | -1.95544 | -2.38971 |
| PF14 0506   | 0.03745  | 0.13279  | -0.55318 | -0.89196 | -1.06778 | -1.28166 | -1.19739 | -1.60338 | -1.04767 | -0.76634 | -1.02625 | -0.84202 | -0.49455 | 0.07493  | 0.58074  | 0.79842  | 0.95384  | 0.99296  | 0.90919  | 0.95037  | 0.63761  | 0.05586  | -0.09027 | -0.32591 |
| PF14 0107   | 0.35776  | 0.1899   | 0.28264  | 0.00362  | 0.08378  | 0.09231  | 0.13446  | 0.22227  | 0.13596  | 0.087    | -0.07914 | -0.19577 | -0.35472 | -0.2592  | -0.30636 | -0.32161 | -0.06474 | 0.12527  | 0.69423  | 0.57183  | 0.7027   | 0.652    | 0.72325  | 0.9436   |
| PF14 0020   | -0.37186 | -0.68623 | -0.6023  | -0.97154 | -0.67417 | -0.67224 | -0.60431 | -0.52125 | -0.55698 | -0.50671 | -0.41685 | -0.22747 | -0.20615 | -0.07549 | 0.08635  | 0.30822  | 0.33178  | 0.57409  | 0.62571  | 0.53667  | 0.31973  | 0.0815   | 0.1326   | -0.05442 |
| MAL13P1.89  | -0.48067 | -0.30722 | -0.33132 | -0.30883 | -0.11092 | -0.0227  | 0.17286  | 0.40129  | 0.60428  | 0.57981  | 0.81619  | 0.72077  | 0.52228  | 0.29026  | 0.24615  | 0.21134  | 0.00491  | -0.02905 | 0.19918  | -0.12005 | -0.37157 | -0.43055 | -0.50434 | -0.29704 |
| PFE0880c    | 0.93699  | 1.1859   | 1.04698  | 1.38949  | 1.66099  | 1.35247  | 1.1555   | 1.38932  | 0.55096  | 0.40865  | 0.41659  | 0.13761  | 0.20314  | -0.06813 | -0.17868 | -0.24576 | -0.38578 | 0.03436  | 0.438    | 0.4009   | 0.52435  | 0.52863  | 0.95565  | 0.59196  |
| PF10 0080   | 0.03823  | -0.10564 | -0.5836  | -0.65186 | -0.83546 | -0.81885 | -0.91206 | -0.99189 | -0.91538 | -0.63185 | -0.34639 | -0.1132  | 0.03615  | 0.12542  | 0.46933  | 0.71931  | 0.63198  | 0.74254  | 1.04366  | 0.75603  | 0.63362  | 0.15285  | -0.05137 | -0.34521 |
| PFL1480w    | 0.27967  | 0.6287   | 0.7016   | 0.70392  | 0.41139  | 0.61664  | 0.44526  | 0.31724  | 0.29966  | 0.38144  | 0.07863  | 0.17689  | 0.11487  | -0.18073 | -0.5547  | -0.82291 | -0.70266 | -0.49563 | -0.81313 | -0.46011 | -0.25591 | 0.16393  | 0.26143  | 0.2636   |
| PFL1260c    | -0.4593  | -0.14984 | 0.09671  | 0.43221  | 0.37745  | 0.80117  | 0.63773  | 0.5718   | 0.3697   | 0.07266  | 0.25163  | 0.30522  | 0.34673  | 0.18763  | 0.40579  | 0.42343  | 0.31946  | 0.15179  | 0.11538  | -0.33501 | -0.37288 | -0.62197 | -0.54417 | -0.58755 |
| PF10 0186   | 0.07425  | -0.09838 | -0.01633 | -0.10281 | -0.0258  | -0.09498 | -0.1446  | -0.24192 | -0.66173 | -0.79678 | -0.74221 | -0.73173 | -0.52073 | -0.10553 | 0.20326  | 0.53248  | 0.98821  | 0.72327  | 0.33771  | 0.56814  | 0.53725  | 0.61489  | 0.312    | 0.15386  |
| PFE0775c    | 0.17878  | 0.1516   | 0.64617  | 0.337    | 0.5063   | 0.37326  | 0.38304  | 0.32503  | 0.11383  | 0.34647  | 0.42127  | 0.28194  | 0.16246  | 0.20621  | -0.07243 | -0.13243 | -0.59791 | -0.23119 | -0.1501  | 0.07826  | 0.09693  | 0.26909  | 0.3271   | 0.54624  |
| PFL0355c    | 0.14949  | 0.31484  | 0.32233  | 0.3487   | 0.28687  | 0.21593  | 0.26348  | 0.43455  | 0.45372  | 0.46646  | 0.44744  | 0.45809  | 0.24305  | 0.09031  | -0.12647 | -0.57209 | -0.79535 | -0.79195 | -0.86421 | -0.5178  | -0.07657 | -0.06233 | 0.05848  | 0.24412  |
| PF14 0723   | -0.34752 | -0.6279  | -0.36736 | -0.39044 | -0.45674 | -0.26558 | -0.28685 | -0.11087 | -0.09222 | -0.14369 | -0.06747 | -0.03511 | 0.0387   | 0.05092  | -0.02089 | -0.00691 | 0.17802  | 0.12878  | 0.15262  | 0.1924   | 0.22564  | 0.5845   | 0.4873   | 0.56833  |
| MAL7P1.14   | 0.47813  | 0.60556  | 0.1178   | 0.10602  | 0.1878   | -0.04859 | -0.1605  | 0.24144  | 0.35617  | 0.58229  | 0.44932  | 0.36089  | 0.43969  | 0.11976  | -0.24817 | -0.58228 | -1.19077 | -1.34283 | -1.17218 | -1.02766 | -0.59776 | -0.38349 | -0.1065  | 0.11636  |
| PF13 0075   | 1.47677  | 1.41954  | 1.92326  | 1.22285  | 0.69072  | 0.4193   | 0.20323  | -0.19652 | -0.18974 | -0.17789 | -0.34751 | -0.60182 | -0.28463 | -0.3137  | -0.73905 | -0.33458 | -0.7528  | -0.86246 | -0.68128 | -0.22162 | 0.04629  | 0.50523  | 0.46455  | 0.90406  |
| MAL13P1.226 | -0.74486 | -1.23689 | -0.62334 | -1.38876 | -1.38538 | -1.2678  | -1.12237 | -0.85821 | -0.92347 | -0.50957 | -0.01569 | 0.18624  | 0.54201  | 0.78723  | 0.91316  | 0.72009  | 0.73664  | 0.49969  | -0.17456 | 0.09126  | -0.15934 | -0.43673 | -0.73672 | -0.98676 |
| PF14 0194   | 0.26095  | 0.46061  | 0.56879  | 0.81048  | 0.82136  | 1.11979  | 0.97688  | 1.00185  | 0.76608  | 0.55509  | 0.62356  | 0.46196  | 0.27273  | 0.05245  | -0.17466 | -0.26573 | -0.43864 | -0.43241 | -0.75786 | -0.80994 | -0.77957 | -0.31043 | -0.16725 | 0.12745  |
| PF14 0637   | 0.02557  | 0.29532  | 0.18656  | 0.50328  | 0.56963  | 0.5854   | 0.80636  | 0.82495  | 0.75769  | 0.49081  | 0.31735  | 0.27474  | 0.24182  | 0.24311  | 0.09699  | -0.04202 | 0.0719   | 0.0062   | -0.244   |          |          |          |          |          |

|             |          |          |          |          |          |          |          |          |          |          |          |          |          |          |          |          |          |          |          |          |          |          |          |          |         |
|-------------|----------|----------|----------|----------|----------|----------|----------|----------|----------|----------|----------|----------|----------|----------|----------|----------|----------|----------|----------|----------|----------|----------|----------|----------|---------|
| PF13_0080   | -0.99753 | -1.20631 | -0.93668 | -1.55759 | -1.6544  | -1.65529 | -1.52126 | -1.34241 | -0.29662 | 0.34516  | 0.49945  | 0.71945  | 0.80881  | 0.99057  | 0.70539  | 0.50429  | 0.53809  | 0.21823  | -0.59806 | -0.42321 | -0.86732 | -0.93449 | -1.1142  | -1.13816 |         |
| PF10_0023   | 1.53389  | 1.88018  | 1.53084  | 1.73564  | 1.68976  | 1.20582  | 0.63     | 0.34732  | -0.45618 | -0.57437 | -0.37836 | -0.61116 | -0.90186 | -1.28895 | -1.46066 | -1.80069 | -2.00865 | -2.13525 | -1.54917 | -0.82014 | -0.08812 | 0.24758  | 0.74436  | 0.96361  |         |
| PF10_0156   | 1.06219  | 1.04234  | 0.20464  | 0.20464  | 0.08512  | 0.13146  | -0.33832 | -0.55146 | -0.80725 | -1.17493 | -1.31246 | -1.32263 | -1.42763 | -1.56057 | -1.46269 | -1.53147 | -1.24647 | -0.73772 | -0.0714  | 1.48547  | 1.35619  | 1.43578  | 1.13192  | 1.50572  | 1.75759 |
| PF07_0021   | 0.18727  | -0.02488 | -0.38504 | -0.29688 | -0.3098  | -0.35707 | -0.47488 | -0.82951 | -0.61912 | -1.15861 | -1.22305 | -1.24241 | -1.1079  | -0.64694 | 0.18511  | 0.48748  | 0.87891  | 1.0885   | 0.93162  | 1.11366  | 1.00245  | 0.46036  | 0.28833  | -0.23691 |         |
| PF08_0008   | 1.45603  | -0.03099 | -0.50417 | -0.82955 | -0.83948 | -1.4876  | -1.7915  | -2.26417 | -2.8355  | -3.39486 | -3.54547 | -3.89235 | -4.40906 | -4.241   | -4.39537 | -3.70734 | -1.98326 | -1.5994  | 1.24974  | 1.40556  | 1.30357  | 1.09777  | 1.65519  | 2.00771  |         |
| PF13_0202   | -0.131   | -0.08846 | -0.42764 | -0.28537 | -0.62929 | -0.4199  | -0.57058 | -0.68708 | -0.50234 | -0.40339 | 0.23203  | 0.30879  | 0.4736   | 0.42586  | 0.66671  | 0.60041  | 0.50383  | 0.37424  | 0.55075  | 1.14771  | 0.01455  | -0.21364 | -0.07324 | -0.00534 |         |
| PFC0160w    | 0.09267  | -0.56335 | -0.54943 | -0.68064 | -0.72017 | -0.94103 | -0.97654 | -0.99337 | -1.07583 | -1.06652 | -0.99692 | -0.83439 | -0.49749 | -0.15976 | 0.27572  | 0.7117   | 0.76619  | 0.83338  | 1.04254  | 0.982    | 0.78331  | 0.44211  | 0.20371  | -0.08771 |         |
| PF11_0382   | 0.40536  | 0.61232  | 1.07738  | 0.77276  | 0.57614  | 0.99065  | 0.85479  | 0.7892   | 0.93372  | 0.64742  | 0.69459  | 0.46044  | 0.38875  | 0.18436  | 0.35095  | 0.12913  | -0.15619 | 0.11184  | -0.04134 | -0.3162  | -0.55704 | -0.30481 | -0.06365 | 0.16568  |         |
| PFF0880c    | -0.36718 | 0.31454  | 0.54404  | 0.58492  | 0.46647  | 0.82886  | 0.7536   | 0.77323  | 0.68763  | 0.65582  | 0.78872  | 0.80206  | 0.68493  | 0.44612  | 0.45882  | 0.05108  | -0.67402 | -0.33329 | -0.61741 | -0.87089 | -1.1456  | -1.061   | -0.78283 | -0.40402 |         |
| PF08_0079   | -0.2349  | 0.3645   | 0.3628   | 0.608    | 0.65807  | 0.71795  | 0.5469   | 0.4625   | 0.48388  | 0.46418  | 0.64942  | 0.59064  | 0.69739  | 0.40909  | 0.35282  | -0.10998 | -0.3466  | -0.49445 | -0.89604 | -0.97381 | -1.02995 | -0.72805 | -0.59287 | -0.29047 |         |
| PF07_0107   | 2.00309  | 2.35399  | 2.23499  | 2.0791   | 1.74525  | 1.37038  | 1.00937  | 0.66857  | 0.15263  | -0.29706 | -0.66179 | -0.99791 | -1.33887 | -1.37558 | -1.6701  | -1.88208 | -1.8261  | -1.80397 | -1.51061 | -0.65289 | 0.34314  | 0.91049  | 1.19434  | 1.2677   |         |
| PFL2395c    | -0.31465 | -0.06288 | 0.30966  | 0.30966  | 0.08953  | 0.1837   | 0.27755  | 0.34516  | 0.5656   | 0.59945  | 0.59897  | 0.75628  | 0.68124  | 0.57978  | 0.38632  | 0.03511  | 0.21237  | -0.35657 | -0.74916 | -0.85339 | -1.05486 | -0.81343 | -0.78295 | -0.58927 |         |
| PF13_0087   | -0.13069 | -0.27738 | 0.79868  | 0.63367  | 0.67084  | 0.83423  | 0.87294  | 0.99192  | 0.79874  | 0.89396  | 0.85201  | 0.62105  | 0.31381  | -0.09621 | -0.1072  | -0.07144 | -0.08182 | -0.35245 | -0.04895 | -0.32422 | -0.56687 | -0.352   | -0.24612 | 0.01875  |         |
| PFB0765w    | 1.03863  | 0.24546  | -0.19992 | -0.8476  | -1.2657  | -1.87397 | -2.10443 | -2.23479 | -2.25383 | -1.87082 | -1.87704 | -1.46074 | -1.36064 | -1.06943 | -1.36439 | -1.5977  | -1.0667  | -0.39809 | -0.09321 | 0.91517  | 1.14061  | 1.25566  | 1.01328  | 0.92649  |         |
| PFI0865w    | 0.76405  | 1.00937  | 0.77371  | 1.06032  | 1.07001  | 1.08895  | 1.04947  | 0.93945  | 1.01152  | 0.81975  | 0.74841  | 0.77217  | 0.4496   | 0.32106  | 0.14798  | -0.07219 | -0.41599 | -0.1394  | -0.3912  | -0.53963 | -0.51067 | -0.00728 | 0.07062  | 0.37918  |         |
| PF11_0158   | 0.01547  | -0.24949 | -1.53957 | -0.65695 | -1.00933 | -1.15062 | -1.25114 | -1.45882 | -1.72891 | -1.67915 | -1.76642 | -1.62141 | -1.63426 | -0.97653 | -0.0051  | 0.69014  | 1.35902  | 0.89223  | 0.95464  | 0.89718  | 1.08868  | 0.81399  | 0.36402  | -0.39779 |         |
| PFL1570w    | 0.50847  | -0.12946 | -0.35895 | -0.50522 | -0.61159 | -0.94465 | -1.10935 | -0.82179 | -1.07259 | -0.95157 | -0.49662 | -0.82202 | -0.64675 | -0.64214 | -0.98742 | -0.74696 | -0.83261 | 0.01583  | 1.04322  | 0.93853  | 0.65029  | 0.64728  | 0.88785  | 1.10121  |         |
| PFI0425w    | -0.41511 | -0.03815 | 0.54403  | 0.46485  | 0.59206  | 0.88859  | 0.76462  | 0.83628  | 0.9541   | 0.8846   | 0.75039  | 0.70116  | 0.45373  | 0.14576  | -0.04769 | -0.05626 | -0.22277 | -0.27858 | -0.05391 | -0.3196  | -0.5007  | -0.35625 | -0.24432 | -0.21363 |         |
| PFE0655w    | 0.28042  | 0.31     | 0.44394  | 0.48992  | 0.48325  | 0.40447  | 0.29891  | 0.225    | 0.29606  | 0.4119   | 0.28951  | 0.37771  | 0.31746  | 0.41155  | 0.10138  | -0.03904 | 0.00211  | -0.22596 | -0.28152 | -0.12264 | -0.0209  | -0.0287  | 0.07077  | 0.09265  |         |
| PFB0800c    | -0.24668 | -0.48648 | -0.216   | -0.42825 | -0.2499  | -0.2838  | -0.21861 | 0.02015  | 0.47775  | 0.7408   | 0.82389  | 0.8334   | 0.85857  | 0.808    | 0.39788  | 0.0856   | 0.04179  | 0.00081  | -0.48651 | -0.19134 | -0.12062 | -0.17147 | -0.13006 | -0.16636 |         |
| PF14_0144   | 0.49581  | 0.8298   | 0.59309  | 0.78544  | 1.00269  | 0.94887  | 0.77195  | 0.77138  | 1.16449  | -0.13546 | -0.26421 | -0.6502  | -0.80545 | -0.96834 | -0.85137 | -0.64879 | -0.54037 | -0.21922 | 0.34256  | 0.10571  | 0.21953  | 0.39281  | 0.59978  | 0.66152  |         |
| PF11_0323   | -0.05852 | -0.09193 | 0.23134  | 0.14513  | 0.30389  | 0.25748  | 0.39178  | 0.00063  | 0.3452   | 0.45398  | 0.6394   | 0.7761   | 0.77799  | 0.74007  | 0.62201  | 0.50223  | 0.23349  | 0.37112  | 0.12198  | 0.0592   | -0.18893 | -0.27961 | -0.21607 | -0.06607 |         |
| PF14_0214   | 0.3745   | 0.59534  | 0.56755  | 0.65859  | 0.63142  | 0.39087  | 0.46687  | 0.68478  | 0.64814  | 0.69738  | 0.61386  | 0.43353  | 0.18088  | -0.10836 | -0.3524  | -0.56327 | -0.46549 | -0.61695 | -0.39895 | -0.32467 | -0.18094 | -0.00668 | 0.12421  | 0.25435  |         |
| PFB0100c    | -0.07255 | 0.4902   | 1.01746  | 1.30299  | 1.65244  | 1.74061  | 1.73185  | 1.8755   | 1.51731  | 0.99896  | 0.6991   | 0.4797   | 0.13435  | -0.24959 | -0.33104 | -0.61882 | -0.87203 | -0.90379 | -1.27399 | -1.03576 | -0.98277 | -0.95616 | -0.82398 | -0.22796 |         |
| MAL13P1.42  | -0.55938 | -0.71904 | -0.57151 | -1.0349  | -1.26874 | -1.29131 | -0.92407 | -1.12525 | -0.38152 | -0.4889  | -0.56557 | -0.21562 | 0.155    | 0.38434  | 0.55604  | 0.74132  | 0.3873   | 0.51463  | 0.1664   | 0.06655  | -0.16964 | -0.46614 | -0.68474 | -0.88853 |         |
| PF07_0129   | -1.94073 | -2.16543 | -2.06097 | -2.29897 | -2.1072  | -2.01473 | -1.42815 | -0.8614  | 0.03813  | 0.27591  | 0.43334  | 0.70443  | 0.8299   | 1.21021  | 0.94806  | 0.55033  | 0.24022  | 0.22249  | -0.67169 | -0.85122 | -1.4083  | -1.83266 | -2.387   | -2.61043 |         |
| PFI0945w    | 1.37773  | 0.18588  | -0.35228 | -0.18867 | -0.58876 | -0.9363  | -1.32533 | -1.61012 | -2.44467 | -2.94081 | -3.12677 | -3.64516 | -3.72522 | -3.64947 | -2.8488  | -2.69816 | -1.97665 | -0.92117 | 1.66703  | 0.99624  | 1.20782  | 1.13633  | 1.34122  | 1.73215  |         |
| PF13_0302   | -0.12996 | -0.1448  | -0.03015 | 0.03766  | 0.16318  | 0.08225  | 0.06662  | 0.12957  | 0.13418  | 0.29188  | 0.26599  | 0.31276  | 0.49239  | 0.58356  | 0.37122  | 0.38433  | 0.29264  | 0.03255  | -0.05447 | -0.26599 | -0.34971 | -0.38851 | -0.29597 | -0.15684 |         |
| PFI1030c    | -0.51794 | -0.29033 | -0.16888 | 0.04263  | 0.24424  | 0.27894  | 0.20237  | 0.53649  | 0.35346  | 0.52313  | 0.77073  | 0.56632  | 0.41854  | -0.09211 | 0.25551  | 0.04367  | -0.16366 | -0.24975 | -0.0925  | -0.47235 | -0.63111 | -0.48454 | -0.21141 | -0.24085 |         |
| PFC0245c    | -0.12111 | -0.30628 | -0.12315 | -0.15642 | -0.30021 | -0.12687 | -0.05528 | -0.23538 | 0.08258  | 0.1549   | 0.02511  | 0.13519  | -0.16137 | -0.16338 | -0.42365 | -0.47684 | -0.07768 | -0.13705 | 0.13246  | 0.13243  | 0.24244  | 0.3324   | 0.14932  | 0.12616  |         |
| PF11_0127   | 0.26775  | -0.44703 | -0.68113 | -0.89029 | -1.06542 | -1.44208 | -1.55257 | -1.52401 | -1.24481 | -0.92687 | -0.91698 | -0.73951 | -0.54764 | -0.04116 | 0.1157   | 0.51546  | 0.60888  | 0.24867  | 0.75736  | 0.83138  | 0.52343  | 0.43213  | 0.33925  | 0.39925  |         |
| PF11_0118   | -0.11873 | 0.28156  | 0.3595   | 0.35185  | 0.4465   | 0.6028   | 0.6251   | 1.04177  | 1.05756  | 1.05846  | 1.09258  | 1.01105  | 0.84004  | 0.56341  | 0.29255  | -0.00824 | -0.22236 | -0.17814 | -0.49156 | -0.45106 | -0.50896 | -0.32531 | -0.23626 | -0.02402 |         |
| PFL1575w    | 0.58956  | 0.22975  | -0.6125  | -0.07431 | -0.21318 | -0.53834 | -0.48092 | -0.52966 | -0.9923  | -0.72506 | -0.74367 | -0.66549 | -0.57774 | -0.26543 | -0.00529 | 0.41692  | 0.62987  | 0.70814  | 1.33838  | 1.25059  | 1.1412   | 0.83403  | 0.76477  | 0.66388  |         |
| PF10_0378   | 1.58491  | 1.90124  | 1.74011  | 2.33716  | 2.40378  | 2.29328  | 1.91374  | 1.27562  | 0.78471  | 0.27273  | -0.22089 | -0.36263 | -0.56093 | -0.66505 | -0.89217 | -1.0508  | -1.8077  | -1.11541 | -0.90107 | -0.36    | 0.19372  | 0.66342  | 1.12483  | 1.1827   |         |
| PFL1110c    | -0.21489 | -0.91793 | -1.03364 | -1.7181  | -2.04753 | -2.48622 | -2.76693 | -3.07388 | -3.1472  | -3.44116 | -2.86425 | -2.69125 | -0.23911 | -1.46604 | -0.48569 | 0.11665  | 0.35322  | 0.6491   | 1.26952  | 1.2844   | 0.99024  | 1.01458  | 0.73677  | 0.7653   |         |
| MAL13P1.271 | 0.08009  | 0.00256  | 0.23924  | 0.33926  | 0.40788  | 0.48573  | 0.42152  | 0.5276   | 0.26872  | 0.27409  | 0.26229  | -0.00313 | -0.17873 | -0.40024 | -0.21261 | -0.19752 | -0.16662 | -0.43051 | 0.82974  | 0.3408   | 0.25432  | 0.01609  | 0.31845  | 0.58479  |         |
| PFI0960w    | -1.09354 | -1.16507 | -1.00441 | -1.15845 | -1.08333 | -1.1867  | -0.71101 | -0.21551 | 0.18949  | 0.61483  | 0.86329  | 1.01575  | 0.95919  | 0.83822  | 0.55108  | 0.39617  | -0.00366 | -0.08904 | -0.24919 | -0.59315 | -0.69395 | -0.71631 | -0.77738 | -0.63716 |         |
| PF11_0271   | -0.48368 | -0.87782 | -0.92458 | -0.52759 | -0.41473 | 0.08388  | 0.25569  | 0.19762  | 0.64168  | 0.53816  | 0.56795  | 0.66074  | 0.82866  | 0.82347  | 0.74395  | 0.61646  | 0.46811  | 0.18582  | 0.40094  | 0.04959  | -0.31341 | -0.39952 | -0.53405 | -0.81109 |         |
| PF14_0413   | -0.77981 | -0.75203 | -0.68269 | -0.84519 | -0.81249 | -0.2472  | 0.57737  | 1.17134  | 1.52499  | 1.46259  | 1.43112  | 1.39623  | 0.97026  | 0.74934  | 0.34243  | -0.0079  | -0.13862 | -0.18481 | -0.51769 | -0.45752 | -0.37133 | -0.38254 | -0.42908 | -0.50561 |         |
| PF13_0109   | 0.30444  | 0.45114  | 0.35207  | 0.7073   | 0.70463  | 0.54985  | 0.64923  | 0.8651   | 0.74624  | 0.75487  | 0.76784  | 0.66822  | 0.30348  | -0.08147 | -0.15558 | -0.49078 | -0.69996 | -0.98148 | -0.71843 | -0.90003 | -0.54337 | -0.15507 | -0.05151 | 0.16439  |         |
| PFL1350w    | 0.19691  | 0.30583  | 0.79162  | 0.73285  | 0.87519  | 0.84129  | 1.07912  | 1.27545  | 1.21264  | 0.99439  | 0.9366   | 0.87396  | 0.49506  | 0.07472  | -0.18258 | -0.47658 | -0.04186 | -0.73464 | -0.78916 | -0.84464 | -0       |          |          |          |         |

|             |          |          |          |          |          |          |          |          |          |          |          |          |          |          |          |          |          |          |          |          |          |          |          |          |
|-------------|----------|----------|----------|----------|----------|----------|----------|----------|----------|----------|----------|----------|----------|----------|----------|----------|----------|----------|----------|----------|----------|----------|----------|----------|
| PF14 0093   | 0.55943  | 0.11839  | 0.14538  | 0.00926  | 0.02677  | -0.34533 | -0.39296 | -0.6595  | -0.28663 | 0.29348  | 0.21997  | 0.23475  | 0.11436  | 0.13128  | -0.12594 | -0.19655 | -0.13012 | 0.4316   | 0.31189  | 0.92834  | 1.18606  | 0.51715  | 0.87363  | 0.7902   |
| PFF0605c    | 1.20684  | 0.79189  | 0.76934  | 1.02834  | 1.05927  | 0.90888  | 0.74629  | 0.80429  | 0.55901  | 0.26348  | 0.34235  | -0.00433 | -0.151   | -0.25275 | -0.20125 | -0.28016 | -0.27756 | 0.74856  | 0.85916  | 1.12949  | 1.3251   | 0.89671  | 1.21503  | 1.4227   |
| MAL13P1.145 | -0.09971 | -0.25596 | -0.01484 | -0.07025 | -0.00308 | 0.12864  | 0.12581  | -0.14424 | -0.00545 | 0.16766  | 0.20998  | 0.25712  | 0.44687  | 0.61181  | 0.42376  | 0.31602  | 0.50173  | 0.35077  | -0.10763 | 0.08207  | 0.0794   | 0.0867   | 0.10591  | 0.13871  |
| PF13 0329   | 0.09611  | -0.10409 | -0.29504 | -0.07872 | 0.04372  | -0.08677 | -0.20674 | -0.15991 | -0.60253 | -0.66647 | -0.3571  | -0.41885 | -0.17763 | -0.13353 | 0.2268   | 0.42846  | 0.44374  | 0.30169  | 1.08243  | 0.73426  | 0.66955  | 0.27569  | 0.54156  | 0.39848  |
| PF10 0366   | -1.24694 | -0.78898 | -0.18576 | 0.13506  | 0.53843  | 1.02142  | 0.87902  | 0.74485  | 0.77544  | 0.66863  | 0.82938  | 0.89191  | 0.61251  | 0.28282  | 0.03173  | -0.28394 | -1.13718 | -1.13155 | -1.33712 | -1.72657 | -1.76071 | -1.47985 | -1.47183 | -1.09004 |
| PF14 0225   | 0.97774  | 0.57248  | 1.23871  | 1.29267  | 1.4673   | 1.19414  | 1.30044  | 0.92252  | 0.58534  | 0.46274  | 0.38414  | 0.18966  | 0.08008  | 0.00453  | -0.40723 | -0.3415  | -0.2056  | 0.17436  | -0.00689 | 0.52784  | 1.02248  | 0.55774  | 0.92504  | 1.03875  |
| PF14 0115   | 0.07472  | 0.20311  | 0.49936  | 0.62971  | 0.75629  | 0.93806  | 0.96287  | 0.82159  | 0.81703  | 0.78895  | 0.75957  | 0.8587   | 0.74145  | 0.85394  | 0.73695  | 0.61633  | -0.14127 | 0.44039  | 0.29313  | 0.08045  | -0.1637  | -0.15411 | -0.0714  | -0.04612 |
| PFD0215c    | 0.11665  | 0.00111  | 0.56212  | 1.56392  | 2.17062  | 1.93937  | 1.54025  | 1.77527  | 1.1086   | 0.81134  | 0.77446  | 0.65611  | 0.38049  | 0.08887  | -0.14967 | -0.04391 | -0.1633  | -0.07704 | 0.05977  | -0.03017 | 0.07673  | 0.13056  | 0.08663  | 0.22036  |
| MAL13P1.96  | -0.78681 | -0.92745 | -1.01944 | -1.11186 | -1.07022 | -1.15789 | -1.2189  | -1.34303 | -1.01633 | -0.70224 | -0.42021 | -0.22676 | 0.29704  | 0.65149  | 0.77931  | 0.56829  | 0.67707  | 0.73371  | -0.06304 | 0.32487  | 0.09111  | -0.34365 | -0.56612 | -0.74034 |
| PF14 0502   | -0.80769 | -0.58641 | -0.79122 | -0.73036 | -0.49863 | -0.4696  | -0.19099 | 0.30246  | 0.64418  | 0.66012  | 0.85964  | 0.95664  | 0.8132   | 0.53178  | 0.36243  | 0.24599  | -0.21166 | 0.03582  | -0.18152 | -0.20253 | -0.50002 | -0.58212 | -0.44846 | -0.47401 |
| PF11 0240   | 0.75431  | 0.80655  | 0.13659  | 1.15806  | 0.86482  | 0.79596  | 0.64107  | 0.65719  | 0.49848  | 0.58323  | 0.50945  | 0.51864  | 0.40867  | 0.49987  | -0.11434 | -0.01693 | -0.22831 | -0.33523 | -0.27224 | -0.05137 | 0.07787  | 0.25954  | 0.40682  | 0.50886  |
| PF11 0184   | -0.14577 | 0.21558  | 0.06885  | 0.82371  | 0.88725  | 1.0097   | 0.98404  | 0.64527  | 0.4122   | 0.64103  | 0.53965  | 0.37279  | 0.55047  | 0.43458  | 0.53365  | 0.60212  | 0.57216  | 0.16129  | 0.52067  | 0.12755  | 0.1523   | -0.10264 | -0.0536  | -0.01391 |
| PF13 0187   | -0.3473  | -0.57995 | -0.82636 | -0.79228 | -1.08265 | -1.10267 | -0.67774 | -0.78846 | -0.00484 | 0.39475  | 0.59648  | 0.77833  | 0.67282  | 0.83969  | 0.61515  | 0.57755  | 0.45895  | 0.67233  | 0.20673  | 0.28221  | -0.31389 | -0.46156 | -0.58417 | -0.71658 |
| PF10 0145   | 0.16238  | 0.4007   | 0.45334  | 0.28324  | 0.49861  | 0.42397  | 0.29826  | 0.4874   | 0.40242  | 0.40013  | 0.48143  | -0.08245 | 0.45627  | 0.33503  | 0.35549  | 0.43855  | 0.40232  | 0.36125  | 0.28664  | 0.20111  | 0.17361  | -0.01659 | -0.07944 | -0.00167 |
| PFC0240c    | 0.69018  | 0.88213  | 0.57417  | 0.92131  | 0.90385  | 0.59416  | 0.42157  | 0.38427  | -0.09371 | -0.16476 | -0.30448 | -0.31605 | -0.42913 | -0.50647 | -0.60975 | -0.65958 | -0.66215 | -0.68002 | -0.1362  | -0.08631 | 0.09709  | 0.3921   | 0.47409  | 0.66613  |
| PF14 0471   | -0.58461 | -0.80816 | -0.82119 | -1.09457 | -0.85641 | -1.14696 | -0.88713 | -0.63197 | -0.19047 | 0.09283  | 0.35289  | 0.37289  | 0.37023  | 0.44198  | 0.50756  | 0.40085  | 0.24024  | 0.34976  | -0.09628 | -0.09629 | -0.21404 | -0.42806 | -0.38345 | -0.61294 |
| PF13 0190   | -0.78605 | -0.23959 | -0.01855 | 0.19956  | 0.2773   | 0.44325  | 0.64075  | 0.96972  | 1.07182  | 1.26147  | 1.21911  | 1.10039  | 0.8791   | 0.37699  | -0.09848 | -0.52613 | -0.17665 | -1.06346 | -1.51427 | -1.63488 | -1.57687 | -1.02865 | -0.91626 | -0.68132 |
| MAL13P1.540 | -0.38857 | -0.0319  | 0.18856  | 0.3824   | 0.39527  | 0.57122  | 0.37358  | -0.12534 | -0.35006 | -0.58851 | -0.69316 | -0.38298 | 0.06451  | 0.57233  | 0.64192  | 0.55556  | 0.47395  | 0.27254  | -0.15905 | -0.17727 | -0.45101 | -0.55181 | -0.70492 | -0.656   |
| PF11 0067   | 1.42019  | 1.00036  | 0.88011  | 0.68758  | 0.96454  | 0.72331  | 0.38861  | 0.3238   | 0.14321  | -0.3056  | -0.28599 | -0.49604 | -0.92206 | -1.34749 | -1.64178 | -1.84128 | -1.92647 | -1.75216 | -0.35865 | 0.19873  | 0.34597  | 0.53385  | 0.71298  | 0.69009  |
| PFD0975w    | 0.34289  | 0.726    | 0.65716  | 0.60255  | 0.63797  | 0.42509  | 0.53506  | 0.83957  | 0.7526   | 0.67589  | 0.54616  | 0.42845  | 0.17616  | -0.09475 | -0.23451 | -0.43485 | -0.50232 | -0.47063 | -0.63947 | -0.4103  | -0.02651 | 0.03606  | 0.22969  | 0.49672  |
| PF10 0161   | -0.09976 | 0.05285  | 0.45123  | 0.3833   | 0.72088  | 1.12029  | 1.23803  | 1.00543  | 1.01668  | 0.86944  | 0.67232  | 0.59326  | 0.60972  | 0.44539  | 0.29246  | 0.2009   | 0.073    | 0.17029  | 0.08987  | 0.08291  | 0.19856  | 0.25842  | 0.14128  | 0.37158  |
| PF14 0025   | -0.46136 | -0.58811 | -0.19812 | -0.28094 | -0.25941 | -0.18153 | -0.0783  | -0.03036 | -0.1315  | 0.21447  | 0.26127  | 0.64784  | 0.45163  | 0.59057  | 0.66749  | 0.62345  | 0.42681  | 0.48798  | 0.3116   | -0.02997 | 0.30273  | -0.24069 | -0.26827 | -0.60539 |
| PF1220w     | 0.44893  | 0.25469  | 0.9326   | 0.34203  | 0.33214  | 0.24502  | 0.29487  | 0.09821  | 0.23157  | 0.48359  | 0.16364  | 0.1996   | 0.05675  | 0.12145  | 0.03142  | 0.1912   | -0.43552 | 0.17143  | 0.31776  | 0.0168   | 0.00498  | -0.12587 | -0.01309 | 0.0256   |
| PF13 0019   | 0.30686  | 0.18795  | 0.29207  | 0.19002  | 0.00272  | -0.18255 | -0.32078 | -0.67889 | -0.94178 | -1.18534 | -1.29047 | -1.43773 | -1.38425 | -1.15551 | -0.70586 | 0.05546  | 0.55685  | 0.72054  | 0.33809  | 0.49559  | 0.56594  | 0.48903  | 0.15686  | 0.02997  |
| PFF0545c    | -0.45946 | -0.52375 | -0.85318 | -0.97439 | -1.18093 | -1.38032 | -1.34188 | -1.45996 | -1.69574 | -1.32012 | -0.82712 | -0.41354 | 0.13494  | 0.16464  | 0.8439   | 0.97171  | 0.86301  | 0.64725  | 1.02051  | 0.35129  | 0.0587   | -0.19916 | -0.52943 | -0.65353 |
| MAL13P1.120 | 0.04314  | 0.26606  | 0.11898  | 0.46633  | 0.34048  | 0.44213  | 0.34735  | 0.56506  | 0.88452  | 0.95368  | 0.67653  | 0.69616  | 0.83087  | 0.57816  | 0.34343  | 0.1078   | -0.04153 | -0.03909 | -0.41103 | -0.4357  | -0.55915 | -0.11589 | -0.13416 | -0.07409 |
| PFL2075c    | 0.11628  | 0.60301  | 0.63451  | 0.59862  | 0.76125  | 0.94489  | 0.71897  | 0.73536  | 0.77079  | 0.65113  | 0.7133   | 0.78879  | 0.82055  | 0.4775   | 0.55035  | 0.31641  | -0.28062 | -0.00465 | -0.09524 | -0.68882 | -0.87333 | -0.69089 | -0.55741 | -0.16819 |
| PF14 0528   | 0.37316  | 0.55654  | 0.46086  | 0.27535  | 0.3818   | 0.2379   | 0.29519  | 0.22034  | 0.11435  | 0.02115  | 0.31825  | 0.34149  | 0.29043  | 0.08595  | 0.06383  | -0.18747 | -0.3324  | -0.78878 | -0.64958 | -0.85151 | -0.63293 | -0.18474 | -0.07075 | 0.23032  |
| PF08 0039   | -0.82634 | -0.05412 | 0.16988  | 0.15865  | 0.44851  | 0.26071  | 0.17629  | 0.43136  | 0.1203   | 0.31397  | 0.38928  | 0.19975  | 0.14341  | 0.03548  | 0.07734  | -0.14597 | -0.78335 | -0.71036 | -1.30749 | -1.52687 | -1.6333  | -1.54244 | -1.33284 | -0.90954 |
| PFI0460w    | 0.63267  | 0.2837   | 0.09929  | -0.24267 | -0.37672 | -0.56299 | -0.74603 | -0.77267 | -0.90876 | -0.88872 | -0.75399 | -0.78685 | -0.79296 | -0.67036 | -0.3325  | 0.16333  | 0.65433  | 0.66322  | 1.65115  | 1.09665  | 1.22004  | 0.91107  | 0.74124  | 0.28663  |
| PF1275w     | -0.26316 | 0.05746  | 0.00542  | -0.08832 | 0.01011  | 0.23576  | 0.14893  | 0.4463   | 0.4199   | 0.70545  | 0.812    | 0.90992  | 0.80906  | 0.68862  | 0.57307  | 0.16829  | 0.13794  | 0.21592  | -0.57552 | -0.6643  | -0.68559 | -0.45147 | -0.66952 | -0.45713 |
| PFA0140c    | -0.1403  | -0.19829 | -0.47941 | -0.40861 | -0.33926 | -0.47825 | -0.31777 | -0.15625 | -0.10143 | 0.10539  | 0.35206  | 0.37439  | 0.49664  | 0.42891  | 0.36597  | 0.36966  | 0.19057  | 0.26914  | 0.20668  | 0.23923  | 0.00372  | -0.08537 | -0.1418  | -0.17073 |
| PFI0570w    | -0.58615 | -0.65262 | -0.59922 | -0.74757 | -1.0552  | -0.38903 | 0.28257  | 0.45336  | 0.73997  | 0.66018  | 0.54882  | 0.76274  | 0.53579  | 0.76637  | 0.62581  | 0.57242  | 0.47737  | 0.54422  | 0.12791  | -0.00161 | -0.21877 | -0.41802 | -0.69728 | -0.90021 |
| PFF0165c    | -0.25342 | -0.17293 | -0.07366 | 0.03423  | 0.05196  | 0.25068  | 0.47837  | 0.45008  | 0.70131  | 0.67669  | 0.53079  | 0.68032  | 0.46611  | 0.50043  | 0.19438  | 0.0067   | 0.08353  | -0.22365 | -0.28413 | -0.33254 | -0.27642 | -0.09224 | -0.03869 | 0.00729  |
| PFL0930w    | -0.52018 | -0.24811 | -0.15099 | 0.0677   | 0.03398  | -0.06758 | -0.03315 | -0.074   | -0.10175 | 0.05672  | 0.07692  | 0.25429  | 0.43838  | 0.62368  | 0.6474   | 0.50288  | 0.47485  | 0.06584  | -0.10305 | -0.24696 | -0.46002 | -0.373   | -0.49558 | -0.65043 |
| PFL14 0402  | -0.60108 | -0.76084 | -0.77564 | -0.98851 | -0.90376 | -0.65436 | 0.09282  | 0.34579  | 0.48193  | 0.14238  | -0.15794 | -0.31457 | -0.39783 | -0.12815 | -0.05503 | 0.14192  | 0.16185  | 0.26612  | 0.05506  | 0.24409  | 0.33156  | 0.08403  | 0.01121  | -0.3315  |
| PFL0900c    | -0.08463 | 0.18718  | 0.26899  | 0.49332  | 0.68223  | 0.63051  | 0.66484  | 0.92069  | 0.78355  | 0.90352  | 0.99899  | 0.73584  | 0.57609  | 0.38366  | 0.07875  | -0.14453 | -0.22241 | -0.63272 | -0.63571 | -0.78708 | -0.69841 | -0.50959 | -0.39025 | -0.07657 |
| PF11 0173   | -0.44944 | -0.8016  | -0.45129 | -0.23988 | -0.05228 | 0.10127  | 0.31972  | 0.55173  | 0.40593  | 0.68761  | 0.64245  | 0.82643  | 0.67289  | 0.74175  | 0.40926  | 0.29609  | 0.04212  | 0.03449  | -0.03893 | -0.25843 | -0.5236  | -0.62572 | -0.56264 | -0.50739 |
| PFL0110c    | -0.65256 | -0.64689 | -1.19706 | -0.77979 | -1.05939 | -0.99799 | -0.97919 | -1.00661 | -1.41416 | -1.4114  | -0.95768 | -0.59841 | 0.08369  | 0.26986  | 0.99633  | 1.09563  | 0.80124  | 0.87476  | 0.81521  | 0.32092  | 0.08939  | -0.0109  | -0.20767 | -0.41114 |
| PFL0495c    | -0.7555  | -1.15431 | -1.03672 | -1.28688 | -1.30452 | -1.25107 | -0.8217  | -0.54406 | -0.00097 | 0.40178  | 0.32414  | 0.54319  | 0.61438  | 0.67277  | 0.5922   | 0.57008  | 0.55179  | 0.34938  | 0.19629  | 0.1103   | -0.19589 | -0.45852 | -0.6045  | -0.83678 |
| PFL1040w    | -0.81653 | -0.50676 | -0.89069 | -1.21422 | -0.95019 | -1.0257  | -1.00634 | -0.64911 | 0.1976   | 0.60562  | 0.79681  | 0.73086  | 0.8347   | 0.70564  | 0.69845  | 0.51113  | 0.4294   | 0.20723  | 0        |          |          |          |          |          |



|                |          |          |          |          |          |          |          |          |          |          |          |          |          |          |          |          |          |          |          |          |          |           |          |          |
|----------------|----------|----------|----------|----------|----------|----------|----------|----------|----------|----------|----------|----------|----------|----------|----------|----------|----------|----------|----------|----------|----------|-----------|----------|----------|
| PFL1475w       | -0.52951 | -0.27346 | -0.03218 | 0.26575  | 0.31615  | 0.43494  | 0.405    | 0.51823  | 0.38125  | 0.66531  | 0.94549  | 1.07564  | 0.84614  | 0.51551  | 0.32038  | 0.25282  | 0.02681  | -0.3499  | -0.0752  | -0.61337 | -0.66258 | -0.53215  | -0.44643 | -0.3291  |
| PF13_0344      | 0.08704  | 0.31663  | 0.51369  | 0.42083  | 0.98114  | 0.94492  | 1.03928  | 1.04914  | 1.03618  | 1.0882   | 0.87155  | 0.78393  | 0.44825  | 0.28378  | -0.11996 | -0.3432  | -0.472   | -0.36491 | -0.80596 | -0.58785 | -0.59484 | -0.17088  | -0.13775 | 0.18325  |
| PF10_0237      | 0.50839  | 0.31992  | -0.04718 | 0.18845  | 0.05424  | 0.06549  | -0.11024 | -0.15305 | -0.48092 | -0.78587 | -0.15496 | -0.13108 | 0.1484   | 0.39624  | 0.54157  | 1.01425  | 0.41634  | 0.61036  | 0.62879  | 0.56005  | 0.17996  | 0.38593   | 0.08772  |          |
| PFB0330c       | -0.57711 | -0.903   | -1.22348 | -1.41768 | -1.63835 | -1.99208 | -2.23103 | -2.2823  | -2.18117 | -1.86413 | -1.78298 | -1.64912 | -0.79731 | 0.38995  | 0.99742  | 1.14247  | 0.93218  | 1.12576  | 0.83197  | 0.60528  | 0.23172  | -0.33881  | -0.79995 | -1.06707 |
| MAL5_tRNA_Leu2 | 0.19317  | 0.85862  | 0.03826  | 0.47415  | 0.24588  | 0.6361   | 0.56179  | 1.15743  | 0.95264  | 0.17849  | 0.3337   | 0.52779  | -0.1875  | -0.19038 | -0.04326 | -0.07501 | -0.33301 | 0.52314  | 0.7489   | 0.00636  | 0.3559   | 1.22997   | 0.79089  | 0.32349  |
| PFL2365w       | -0.23345 | -0.25021 | 0.00156  | -0.27534 | -0.1345  | 0.00309  | -0.06578 | -0.16378 | 0.13756  | 0.18682  | 0.36814  | 0.53398  | 0.62654  | 0.72079  | 0.75536  | 0.53446  | 0.26451  | 0.43139  | -0.09379 | -0.18779 | -0.37102 | -0.38911  | -0.38141 | -0.40001 |
| MAL13P1.60     | 1.4737   | 0.39931  | 0.01485  | -0.97188 | -1.33938 | -1.71139 | -2.27661 | -2.6919  | -3.27853 | -3.68695 | -3.70619 | -4.10409 | -4.34811 | -4.7923  | -4.70003 | -3.97824 | -2.13656 | -0.79403 | 1.05464  | 1.34186  | 1.43437  | 1.48638   | 1.58302  | 1.43806  |
| PF10_0173      | -0.2416  | -0.04112 | 0.3221   | 0.26675  | 0.2574   | 0.44093  | 0.57046  | 0.53881  | 0.7403   | 0.92459  | 0.65987  | 0.75948  | 0.20983  | 0.18058  | -0.07865 | -0.10196 | 0.18439  | -0.0611  | -0.21264 | -0.03264 | -0.25819 | -0.23722  | -0.29084 | -0.20223 |
| PF0565c        | 0.48057  | -0.03115 | 0.05638  | 0.28892  | 0.07972  | 0.10049  | -0.06986 | -0.38063 | -0.5901  | -0.41927 | -0.33582 | 0.00632  | -0.146   | -0.22221 | -0.20387 | -0.06727 | 0.11058  | 0.0642   | 1.22139  | 0.63283  | 0.68234  | 0.42357   | 0.91734  | 0.90949  |
| PF10_0136      | -0.05654 | 0.14125  | 0.71324  | 0.53955  | 0.62456  | 0.84327  | 0.68499  | 0.16167  | -0.0175  | -0.00032 | 0.02815  | 0.12826  | 0.20458  | 0.25738  | 0.31195  | 0.09145  | -0.24331 | -0.04975 | -0.26347 | -0.50114 | -0.29676 | -0.35867  | -0.0541  |          |
| PFL1650w       | -0.41685 | -0.29161 | -0.53145 | -0.59346 | -0.50982 | -0.57585 | -0.23027 | 0.11012  | 0.0685   | 0.46111  | 0.43579  | 0.49208  | 0.54622  | 0.63227  | 0.45055  | 0.28883  | 0.12169  | 0.24741  | -0.08336 | 0.07789  | -0.04596 | -0.11179  | -0.28667 | -0.40638 |
| PFL0615w       | -0.35914 | -0.26562 | -0.4521  | -0.36667 | -0.60814 | -0.40555 | -0.22328 | 0.24885  | 0.32455  | 0.29876  | 0.4596   | 0.71565  | 0.60697  | 0.44247  | 0.6143   | 0.45266  | 0.25114  | 0.33319  | 0.24771  | -0.12922 | -0.15238 | -0.34538  | -0.38935 | -0.28906 |
| PF11_0054      | -0.59772 | -0.77281 | -0.68639 | -0.85253 | -0.9446  | -0.89759 | -0.58555 | -0.68101 | -0.63233 | -0.46957 | -0.2724  | 0.08628  | 0.62211  | 0.82877  | 0.88833  | 0.74108  | 0.49459  | 0.60222  | 0.07432  | -0.10002 | -0.32913 | -0.24768  | -0.49395 | -0.51355 |
| PF10_0128      | 0.19708  | 0.68335  | 0.71332  | 0.82487  | 0.79679  | 0.72077  | 0.69529  | 0.72872  | 0.69798  | 0.70694  | 0.71848  | 0.64669  | 0.53994  | 0.27629  | 0.18632  | -0.2137  | -0.39596 | -0.86423 | -0.79278 | -0.94671 | -0.67839 | -0.2105   | -0.12516 | 0.08476  |
| PF14_0282      | 0.45449  | 0.75304  | 0.6572   | 0.52331  | 0.50958  | 0.41212  | 0.29893  | 0.07932  | 0.35922  | 0.51847  | 0.71184  | 0.79365  | 0.79629  | 0.91055  | 0.50908  | 0.18153  | 0.07925  | -0.19719 | -0.84298 | -0.75848 | -0.65285 | -0.21771  | -0.20201 | -0.10382 |
| PF13_0181      | 0.13626  | 0.10596  | 0.27523  | -0.22388 | -0.30169 | -0.24033 | -0.23287 | -0.22388 | -0.59678 | 0.23421  | -0.07098 | 0.30434  | 0.1719   | 0.37496  | 0.07232  | -0.01756 | 0.09031  | 0.25701  | 0.04971  | 0.34509  | 0.31923  | 0.47199   | 0.38704  | 0.53763  |
| PF10_0342      | -0.11534 | -0.33557 | -0.61463 | -1.12482 | -1.58553 | -1.91708 | -2.05076 | -2.46615 | -2.80934 | -3.35721 | -3.44947 | -3.43197 | -2.86432 | -2.08777 | -0.59513 | 0.39965  | 0.78887  | 0.92199  | 1.23688  | 0.95742  | 0.75679  | 0.41742   | 0.21908  | -0.29874 |
| PF14_0527      | 0.70469  | -0.58209 | -0.80051 | -0.8936  | -0.74212 | -1.30882 | -1.49627 | -1.45706 | -1.80511 | -2.46468 | -2.54407 | -3.02606 | -3.28678 | -3.43614 | -3.22971 | -2.50503 | -0.59959 | -0.92133 | 1.70027  | 1.46897  | 1.47354  | 0.91176   | 1.46829  | 1.72171  |
| PFD0735c       | -1.1868  | -1.38096 | -1.62864 | -1.50605 | -1.50916 | -1.59115 | -1.25153 | -1.02456 | -0.42503 | 0.03786  | -0.06946 | 0.16987  | 0.59909  | 0.97075  | 0.76119  | 0.53749  | 0.48201  | 0.45176  | -0.35073 | -0.07566 | -0.52002 | -0.86392  | -1.15194 | -1.37154 |
| PFL0720w       | 0.22504  | 0.19536  | 0.08231  | -0.08287 | -0.24987 | -0.04868 | 0.1352   | 0.49291  | 0.87162  | 0.48768  | 0.59728  | 0.63942  | 0.31098  | 0.5191   | 0.52946  | 0.70257  | 0.42265  | 0.51413  | 0.64628  | 0.47794  | 0.23724  | 0.10803   | -0.20337 | -0.48609 |
| PF11_0084      | -0.8418  | -0.8485  | -0.21578 | -0.34722 | -0.22591 | -0.09319 | 0.10572  | 0.1015   | 0.2336   | 0.4831   | 0.56587  | 0.60263  | 0.67072  | 0.66477  | 0.46633  | 0.35317  | 0.33213  | 0.05309  | -0.24282 | -0.31308 | -0.5729  | -0.66644  | -0.72164 | -0.459   |
| PFB0315w       | 0.7267   | 0.12106  | -0.45709 | -0.43015 | -0.84081 | -1.16916 | -1.37628 | -1.54851 | -1.7127  | -1.69061 | -1.59472 | -1.41981 | -1.31659 | -1.27831 | -1.06648 | -0.90982 | -0.30593 | 0.19136  | 0.99165  | 0.94803  | 1.14933  | 1.06768   | 1.11213  | 0.99118  |
| MAL7P1.5       | 2.39094  | 2.32955  | 1.58296  | 2.09345  | 1.89886  | 1.79669  | 1.40105  | 1.22029  | 0.30774  | -0.07542 | -0.01103 | -0.04717 | -0.34338 | -0.31346 | -0.46461 | -0.66291 | -0.77349 | -0.07427 | 0.6944   | 1.30227  | 1.36702  | 1.56678   | 1.61309  |          |
| MAL8P1.150     | 0.40414  | -0.06253 | -0.26376 | -0.55548 | -0.81546 | -1.01492 | -1.25632 | -1.46101 | -1.84364 | -2.15985 | -2.40291 | -2.58686 | -2.43596 | -1.97972 | -1.02456 | -0.09803 | 0.7125   | 0.77187  | 0.99138  | 1.11574  | 1.20415  | 0.99435   | 0.76223  | 0.40529  |
| PF08_0084      | 0.38775  | 0.45751  | 0.79305  | 1.22508  | 0.95666  | 0.76603  | 0.67461  | 1.02316  | 0.94319  | 0.7635   | 0.89733  | 0.99741  | 0.58213  | 0.4727   | 0.45342  | 0.45617  | -0.27415 | 0.02111  | 0.10182  | -0.15197 | -0.2183  | -0.14384  | -0.01504 | 0.07667  |
| PFL1410c       | 0.72069  | 1.05678  | 1.47657  | 1.71173  | 1.8761   | 1.70639  | 1.32062  | 0.90366  | 0.57059  | 0.13147  | -0.2838  | -0.50361 | -0.71625 | -0.73571 | -1.0206  | -1.06399 | -1.09969 | -1.06962 | -1.18749 | -0.73635 | -0.33774 | -0.00193  | 0.3043   | 0.51525  |
| PFD0485w       | 0.09615  | 0.26665  | 0.22289  | 0.29342  | 0.24038  | 0.29819  | 0.32228  | 0.3762   | 0.24124  | 0.13094  | 0.07752  | 0.07475  | -0.26026 | -0.52547 | -0.85469 | -0.50583 | -0.15255 | -0.31517 | 0.3013   | 0.14356  | 0.12157  | 0.01199   | 0.1454   | 0.11878  |
| PF10_0077      | -0.07155 | -0.18647 | -0.12701 | -0.24352 | -0.33882 | -0.29733 | -0.35709 | 0.54385  | 0.59214  | 0.59579  | 0.61588  | 0.71827  | 0.67211  | 0.35633  | 0.06953  | -0.18692 | -0.50106 | -0.4618  | -0.5747  | -0.75504 | -0.63184 | -0.50156  | -0.36752 | -0.11171 |
| MAL7P1.145     | 0.60802  | 0.45612  | 0.27692  | 0.13245  | 0.12849  | 0.24728  | 0.21043  | -0.00214 | 0.2871   | 0.1545   | 0.07785  | 0.10171  | 0.33006  | 0.33987  | 0.32973  | 0.39455  | 0.3762   | 0.47084  | 0.30495  | 0.25463  | 0.01301  | 0.18247   | 0.08643  | 0.06267  |
| PFC0070c       | -0.89193 | -0.76403 | -0.68291 | -1.22922 | -0.30271 | 0.66302  | 1.33817  | 1.83159  | 1.50189  | 1.26091  | 1.11095  | 0.77869  | 0.43268  | 0.37059  | 0.23923  | 0.09296  | -0.20817 | -0.18098 | -0.26187 | -0.68447 | -0.94523 | -0.95652  | -1.03777 | -1.13291 |
| PF11110c       | -0.16142 | 0.35958  | 0.40462  | 0.56832  | 0.41241  | 0.48186  | 0.52702  | 0.5408   | 0.68356  | 0.68866  | 0.73031  | 0.77459  | 0.61443  | 0.33436  | 0.26856  | -0.085   | -0.58788 | -0.57626 | -0.92724 | -1.02543 | -0.85461 | -0.36763  | -0.20294 | -0.2263  |
| PF14_0237      | -0.18934 | -0.04928 | 0.43185  | 0.32023  | 0.29102  | 0.47551  | 0.41618  | 0.27418  | 0.18225  | 0.04306  | 0.03537  | -0.01013 | 0.11448  | 0.12904  | 0.41213  | 0.41571  | 0.19818  | 0.27164  | 0.30976  | 0.1389   | -0.0188  | -0.17064  | -0.15714 | 0.03067  |
| PF13_0291      | -0.96619 | -1.22874 | -1.374   | -1.59224 | -1.71159 | -1.85631 | -2.00762 | -1.89611 | -1.45686 | -0.84205 | -0.25781 | -0.08185 | 0.41469  | 0.50975  | 0.746    | 0.83824  | 0.45876  | 0.37883  | 0.57432  | 0.11183  | -0.05913 | -0.49842  | -0.83393 | -1.07909 |
| MAL8P1.135     | 0.48793  | 0.03156  | 0.1612   | -0.46208 | -0.26015 | -0.5646  | -0.73379 | -0.83703 | -1.50179 | -1.53136 | -1.45135 | -1.40504 | -1.24474 | -0.73277 | -0.19481 | 0.46725  | 0.61156  | 0.76896  | 1.39122  | 1.25925  | 1.10491  | 0.66221   | 0.67968  | 0.35626  |
| PF11_0349      | 0.38059  | 0.50095  | 0.549    | 0.48868  | 0.43077  | 0.42398  | 0.36189  | -0.02    | -0.06166 | -0.16297 | -0.18066 | -0.07149 | 0.21763  | 0.46947  | 0.42025  | 0.40677  | 0.38698  | 0.24155  | -0.08531 | -0.12357 | -0.24388 | -0.03388  | -0.12963 | -0.13563 |
| PFL2270w       | 1.0246   | 0.7211   | 0.36039  | 0.59894  | 0.58464  | 0.33405  | 0.07855  | 0.10488  | -0.25312 | -0.43463 | -0.07717 | -0.1533  | -0.17463 | -0.41481 | -0.27138 | -0.39978 | -0.61256 | -0.61684 | -0.26568 | 0.16109  | 0.37203  | 0.40405   | 0.83322  | 1.1342   |
| PFF0400w       | -0.48813 | -0.42266 | -0.21903 | -0.30846 | -0.31082 | -0.09213 | 0.02459  | -0.16375 | 0.05736  | 0.14862  | 0.22427  | 0.50217  | 0.72814  | 0.91143  | 0.83195  | 0.48842  | 0.3881   | 0.32126  | -0.42322 | -0.34631 | -0.5479  | -0.60536  | -0.74058 | -0.63706 |
| PF08_0067      | -0.49994 | -0.60177 | -0.41367 | -0.74695 | -0.6745  | -0.32727 | 0.01404  | 0.07715  | 0.45093  | 0.42986  | 0.31329  | 0.60473  | 0.44001  | 0.49093  | 0.42943  | 0.40758  | 0.19231  | 0.26469  | 0.34083  | 0.16987  | -0.28243 | -0.4193   | -0.53604 | -0.58102 |
| PFL1515c       | 0.82678  | 0.29864  | 0.15425  | 0.05718  | -0.16336 | -0.33676 | -0.61303 | -0.59047 | -0.89878 | -0.98145 | -1.01666 | -0.99439 | -1.1405  | -1.1801  | -1.26558 | -1.19617 | -0.22602 | -0.2814  | 0.94856  | 0.82449  | 1.03914  | 1.03627   | 1.16974  | 1.30349  |
| PF14_0256      | 0.28256  | 0.43276  | 0.57936  | 0.55852  | 0.83584  | 0.90772  | 0.71585  | 0.86358  | 0.80109  | 0.83327  | 1.11728  | 1.06665  | 0.87636  | 0.41823  | 0.27573  | -0.03913 | -0.47508 | -0.2695  | -0.37631 | -0.53671 | -0.36813 | -0.13951  | 0.21804  | 0.50903  |
| PFL13_0260     | -0.49612 | -0.51372 | -1.66864 | -0.8013  | -0.80834 | -0.81251 | -0.90702 | -0.79748 | -0.82799 | -1.0253  | -0.99227 | -0.85305 | -0.33722 | -0.2034  | 0.59114  | 0.94825  | 0.79785  | 0.76916  | 1.27773  | 0.76318  | 0.61947  | 0.15473</ |          |          |

|             |          |          |          |          |          |          |          |          |          |          |          |          |          |          |          |          |          |          |          |          |          |          |          |          |
|-------------|----------|----------|----------|----------|----------|----------|----------|----------|----------|----------|----------|----------|----------|----------|----------|----------|----------|----------|----------|----------|----------|----------|----------|----------|
| PF1200w     | 0.64659  | -0.11943 | 0.13927  | -0.19084 | -0.1144  | -0.27979 | -0.33768 | -0.63151 | -0.84956 | -0.6415  | -0.59758 | -0.73753 | -0.65303 | -0.54608 | -0.53548 | -0.54343 | -0.38312 | -0.1938  | 0.68751  | 0.76276  | 0.83192  | 0.66031  | 0.72147  | 1.03782  |
| PF14 0390   | 0.15874  | 0.5171   | 0.5683   | 0.32463  | 0.32768  | 0.03304  | -0.18876 | -0.43301 | -0.64271 | -0.24192 | -0.10005 | 0.14042  | 0.24575  | 0.33961  | 0.25854  | 0.12714  | -0.32845 | -0.16986 | -0.92554 | -0.81029 | -0.50103 | -0.16203 | -0.06567 | -0.13481 |
| PFE0125w    | 0.95912  | 2.04437  | 1.04202  | 0.86221  | 0.69655  | 1.06936  | 1.41353  | 0.68853  | 1.58693  | 0.93046  | 0.60867  | 0.58275  | 0.22772  | 0.12302  | 0.05199  | -0.11498 | -0.28086 | -0.08693 | 0.0293   | 0.01852  | 0.13196  | 0.10089  | 0.04715  | 0.08346  |
| PF11 0305   | 0.05971  | 0.69654  | 0.7823   | 0.91976  | 0.77276  | 0.69623  | 1.11966  | 1.23521  | 1.30099  | 1.30651  | 0.94507  | 0.83632  | 0.5797   | 0.18939  | -0.24969 | -0.73327 | -0.87756 | -0.92735 | -1.52855 | -1.48349 | -1.21771 | -0.72732 | -0.54791 | -0.05244 |
| PFL2370c    | -0.54954 | -0.49506 | -0.23022 | -0.72153 | -0.48528 | -0.56734 | -0.40989 | -0.30699 | -0.19131 | -0.35196 | -0.1156  | 0.00138  | 0.17965  | 0.20776  | 0.20895  | 0.56478  | 0.14776  | 0.45086  | 0.40829  | 0.05098  | -0.00605 | -0.38423 | -0.4801  | -0.42408 |
| PF14 0345b  | -0.21473 | -0.2195  | -0.13703 | -0.16432 | -0.07514 | -0.17639 | -0.0756  | 0.04621  | 0.01871  | 0.08766  | 0.4605   | 0.29638  | 0.47196  | 0.34155  | 0.32572  | 0.39362  | 0.13885  | 0.17727  | 0.25067  | 0.09945  | -0.12817 | -0.29711 | -0.23113 | -0.04236 |
| PFL2065c    | -0.37601 | -0.4905  | -0.73929 | -0.44365 | -0.37005 | -0.12068 | 0.07378  | 0.84509  | 0.61151  | 0.53075  | 0.69039  | 0.74884  | 0.28422  | -0.10336 | 0.02329  | 0.09027  | -0.04885 | 0.16912  | 0.56102  | 0.19686  | -0.02564 | -0.16412 | -0.16084 | -0.32579 |
| PFC0850c    | -0.08132 | 0.27973  | 0.60162  | 0.52581  | 0.36281  | 0.38914  | 0.44308  | 0.51742  | 0.49843  | 0.6832   | 0.6758   | 0.75144  | 0.62384  | 0.48575  | 0.27538  | -0.07042 | -0.17481 | -0.3809  | -0.60562 | -0.71164 | -0.85566 | -0.47858 | -0.26258 | -0.12536 |
| PF14 0419   | 0.435    | 0.44904  | 0.22064  | 0.102    | 0.14232  | 0.02787  | -0.02134 | -0.20169 | -0.3714  | -0.26382 | -0.29625 | -0.16234 | -0.16995 | -0.05685 | -0.00519 | 0.19628  | 0.56316  | 0.6595   | 0.39252  | 0.74086  | 0.7559   | 0.74291  | 0.53825  | 0.21434  |
| PF08 0097   | -0.41237 | -0.42812 | -0.35828 | -0.21907 | 0.07118  | 0.54101  | 0.69589  | 0.87196  | 0.99309  | 0.77586  | 0.7163   | 0.62635  | 0.45627  | 0.36705  | 0.30485  | -0.00021 | 0.16091  | 0.26891  | -0.01543 | -0.22982 | -0.32855 | -0.33219 | -0.31787 |          |
| PF14 0549   | 0.51096  | 0.71095  | 1.1555   | 1.20786  | 0.98403  | 1.14197  | 1.00622  | 1.01365  | 0.76245  | 0.71852  | 0.64709  | 0.54879  | 0.57325  | 0.31227  | 0.29916  | 0.23549  | 0.08307  | 0.03209  | 0.77689  | 0.14325  | 0.06709  | 0.4601   | 0.33625  | 0.16036  |
| PFB0279w    | -0.27227 | -0.03419 | 0.26626  | 0.29944  | 0.46773  | 0.52625  | 0.88781  | 0.71306  | 0.94227  | 0.88084  | 0.53061  | 0.34699  | 0.27349  | 0.327    | -0.29767 | -0.54428 | -0.36665 | -0.48073 | -1.38295 | -0.61479 | -0.51512 | -0.25523 | -0.09973 | 0.34106  |
| MAL13P1.209 | -1.24948 | -0.32845 | 0.05976  | -0.07202 | 0.07815  | 0.08748  | -0.02304 | 0.51087  | 0.05069  | 0.33745  | 0.47528  | 0.26331  | 0.27524  | 0.08091  | 0.1559   | -0.23377 | -0.97436 | -0.86364 | -1.10205 | -1.58549 | -1.19743 | -1.29292 | -1.18177 | -0.95305 |
| PF1700c     | 0.43518  | 0.19002  | 0.46446  | 0.22082  | 0.26686  | 0.22483  | 0.08837  | -0.01736 | -0.01063 | 0.00105  | 0.08245  | 0.20742  | 0.33765  | 0.3783   | 0.22657  | 0.03303  | -0.2447  | -0.05242 | -0.08012 | -0.06003 | 0.79504  | 0.08346  | 0.18439  | 0.45431  |
| PF14 0485   | -0.83997 | -0.44645 | -0.56321 | 0.45651  | 0.31927  | 0.59479  | 0.79124  | 0.87501  | 0.79891  | 0.75214  | 0.58346  | 0.67999  | 0.70442  | 0.52251  | 0.41037  | 0.18351  | 0.15958  | -0.03558 | -0.30617 | -0.24016 | -0.27709 | -0.14707 | -0.04001 | -0.02175 |
| MAL13P1.31  | -0.96493 | -1.2559  | -0.51955 | -1.06258 | -0.88001 | -0.94251 | -0.52123 | 0.14709  | 0.60845  | 0.89692  | 0.93706  | 1.02879  | 0.89881  | 0.86134  | 0.49401  | 0.26707  | 0.05685  | -0.07139 | -0.58763 | -0.54932 | -0.72251 | -0.69835 | -0.82678 | -0.66716 |
| PF11735c    | 0.63052  | 1.41782  | 2.58405  | 2.55095  | 3.3618   | 2.62212  | 2.82103  | 1.47289  | 0.63086  | -0.12642 | -1.33569 | -2.53318 | -1.33817 | -3.8749  | -4.07394 | -4.36481 | -2.82004 | -3.69475 | -2.98745 | -3.14916 | -1.91555 | -0.72651 | -0.31374 | 0.63408  |
| PF11 0122   | -0.10561 | -0.06963 | -0.47563 | -0.14644 | -0.10009 | -0.06816 | -0.17218 | -0.19499 | -0.18434 | -0.21543 | -0.09307 | 0.05831  | 0.23748  | 0.229    | 0.55101  | 0.57286  | 0.56597  | 0.49635  | 0.51251  | 0.17704  | 0.04358  | 0.27435  | 0.08543  | 0.12126  |
| PFB0175c    | 0.77277  | 1.21451  | 1.06551  | 1.12904  | 1.10185  | 1.09459  | 1.22296  | 1.23479  | 1.3614   | 1.17522  | 0.90713  | 0.57451  | 0.19417  | -0.20839 | -0.71663 | -1.05961 | -1.17699 | -1.30733 | -1.64521 | -0.97122 | -0.4238  | 0.17328  | 0.39366  | 0.67732  |
| PF11 0253   | 0.17915  | -0.36045 | -0.64852 | -0.40571 | -0.59675 | -0.41158 | -0.22824 | 0.15476  | 0.07549  | -0.22368 | -0.35395 | -0.44488 | -0.43359 | -0.3241  | 0.1503   | 0.59781  | 0.821    | 0.63293  | 1.16584  | 0.6675   | 0.64532  | 0.49078  | 0.30386  | 0.0882   |
| PFI0755c    | -0.79492 | -0.28168 | 0.04026  | 0.46132  | 0.59474  | 0.73172  | 0.59678  | 0.51126  | 0.45714  | 0.55301  | 0.66187  | 0.62368  | 0.58893  | 0.50685  | 0.27981  | -0.04352 | -0.44167 | -0.75727 | -0.93778 | -1.4387  | -1.54568 | -1.29805 | -1.24852 | -0.86071 |
| PF14 0462   | -0.88133 | -0.85653 | -1.00849 | -0.8404  | -0.62035 | -0.6174  | -0.39033 | -0.36778 | -0.28989 | -0.07523 | 0.04033  | 0.15505  | 0.39033  | 0.55976  | 0.57549  | 0.60024  | 0.34505  | 0.39275  | 0.17801  | 0.10041  | -0.23822 | -0.35071 | -0.54066 | -0.7248  |
| PF14 0243b  | 0.51211  | 0.62087  | 0.46036  | 0.63727  | 0.9427   | 0.73523  | 0.93115  | 0.85807  | 0.44405  | 0.18253  | 0.11192  | 0.07743  | 0.04967  | 0.1744   | 0.37117  | 0.51165  | 0.6486   | 0.33381  | 0.65373  | 0.3844   | 0.49081  | 0.36943  | 0.21174  | 0.21956  |
| PF07 0078   | 0.04491  | -0.67371 | -0.56116 | -0.98566 | -1.06679 | -1.03695 | -1.1923  | -1.1899  | -0.72193 | -0.39253 | -0.31934 | 0.00624  | 0.03214  | 0.23625  | 0.38709  | 0.61085  | 0.76016  | 0.71264  | 1.25464  | 0.96087  | 0.85341  | 0.46127  | 0.42012  | -0.01191 |
| PFL1355w    | -0.09233 | -0.24628 | -0.38186 | -0.1829  | -0.25145 | 0.08917  | 0.1187   | 0.27289  | 0.32224  | 0.23918  | 0.49395  | 0.46934  | 0.58567  | 0.48074  | 0.34423  | 0.6388   | -0.01529 | 0.43204  | 0.54461  | -0.1754  | -0.13084 | -0.30523 | -0.48406 | -0.42335 |
| PFC0365w    | -0.32752 | 0.0477   | -0.04789 | 0.76021  | 1.02792  | 0.67712  | 0.36547  | 0.43018  | 0.26489  | 0.15797  | 0.48735  | 0.412    | 0.19115  | -0.01201 | -0.18664 | -0.39533 | -0.81211 | -0.83504 | -0.87246 | -0.97101 | -0.65567 | -0.66036 | 0.56525  | 1.06135  |
| PF14 0576   | -0.38189 | 0.19682  | 0.24503  | 0.1021   | 0.55332  | 0.38507  | 0.33134  | 0.68613  | 0.67315  | 0.62555  | 0.73981  | 0.63916  | 0.47694  | 0.03322  | -0.02376 | -0.05806 | -0.24402 | -0.27246 | -0.35773 | -0.69885 | -0.759   | -0.56221 | -0.55119 | -0.50579 |
| PFC1000w    | 0.05623  | 0.72161  | 0.95108  | 0.95565  | 0.94515  | 0.92868  | 1.02963  | 0.92732  | 1.06615  | 0.90571  | 0.73131  | 0.65932  | 0.42523  | 0.21762  | -0.04523 | -0.26251 | -0.53762 | -0.30363 | -0.44756 | -0.47967 | -0.58114 | -0.26968 | -0.179   | 0.04053  |
| PFF1295w    | 0.11098  | 0.38065  | 0.46099  | 0.44904  | 0.56032  | 0.55265  | 0.47915  | 0.43314  | 0.29685  | 0.36852  | 0.68837  | 0.74365  | 0.65218  | 0.24041  | 0.21575  | -0.12889 | -0.5873  | -0.50071 | -0.83328 | -1.0591  | -1.06342 | -0.7618  | -0.59643 | 0.33143  |
| PFA0245w    | 0.21088  | -0.50439 | -0.90673 | -1.17006 | -1.46988 | -1.45242 | -1.98436 | -1.96578 | -1.92445 | -1.2103  | -0.39958 | -0.29952 | -0.03105 | 0.02243  | 0.171    | 0.23176  | 0.02961  | 0.12252  | 0.9584   | 0.66998  | 0.41738  | 0.31089  | 0.3144   | 0.30769  |
| PFE0840c    | -0.4187  | -0.51915 | -0.38284 | -0.52616 | -0.51767 | -0.58367 | -0.58571 | -0.68364 | -0.85976 | -0.89687 | -0.98278 | -0.8364  | -0.21261 | 0.47267  | 0.77052  | 0.84845  | 0.65685  | 0.80142  | 0.11836  | 0.4226   | 0.24849  | 0.07708  | -0.0958  | -0.27299 |
| PFL2410w    | 0.35847  | 0.26472  | 0.00575  | 0.01888  | -0.04248 | -0.40806 | -0.52201 | -0.27624 | -0.58567 | -0.58323 | -0.73717 | -0.84725 | -0.9596  | -1.07844 | -1.35357 | -1.06332 | -0.48075 | 0.05654  | 0.55196  | 0.58595  | 0.42521  | 0.5515   | 0.55615  | 0.49617  |
| PFE0980c    | -1.01902 | -0.97759 | -0.5605  | -0.37668 | -0.01059 | 0.2779   | 0.53625  | 0.45411  | 1.04906  | 1.00901  | 0.7107   | 0.75158  | 0.77705  | 0.81749  | 0.1925   | -0.07102 | 0.0333   | -0.11108 | -0.82437 | -0.47597 | -0.65342 | -0.55399 | -0.59171 | -0.68132 |
| PF14 0433   | 0.55507  | 0.47783  | 0.13319  | 0.48587  | 0.61511  | 0.34916  | 0.22615  | 0.5793   | 0.5188   | 0.34518  | 0.23108  | 0.11827  | -0.3106  | -0.49376 | -0.81286 | -0.67195 | -0.90232 | 0.00169  | 0.10499  | 0.38482  | 0.39491  | 0.33662  | 0.54138  | 0.46118  |
| PFF1365c    | 0.28774  | -0.40117 | -0.59086 | -0.96263 | -1.27405 | -1.53619 | -1.8475  | -2.159   | -2.68789 | -2.8309  | -3.20545 | -3.42455 | -3.4053  | -2.96384 | -1.69565 | -0.18241 | 0.8953   | 1.00334  | 0.89301  | 1.17783  | 1.21428  | 1.06475  | 0.82426  | 0.11291  |
| PF14 0394   | -0.56815 | -0.4839  | -0.2504  | -0.64956 | -0.36124 | -0.14734 | -0.14832 | -0.22376 | -0.21305 | -0.05452 | 0.04979  | 0.26384  | 0.37428  | 0.36897  | 0.55315  | 0.60323  | 0.47811  | 0.42668  | 0.24106  | 0.07467  | -0.16019 | -0.44713 | -0.60492 | -0.63742 |
| PF14 0631   | 0.03567  | 0.16056  | 0.26155  | 0.54797  | 0.69127  | 0.83503  | 0.76843  | 0.55541  | 0.48727  | 0.47772  | 0.31099  | 0.1202   | 0.18162  | 0.22533  | -0.12274 | -0.07467 | 0.05763  | 0.14187  | -0.264   | 0.41178  | 0.65347  | 0.88501  | 0.92127  | 0.88978  |
| MAL8P1.81   | -0.21671 | 0.12645  | 0.12092  | -0.33771 | -0.55154 | -0.53528 | -0.77598 | -1.0267  | -1.65604 | -2.1321  | -2.51152 | -2.87541 | -2.47013 | -1.65174 | -0.15647 | 0.2792   | 0.66682  | 0.29085  | 0.99573  | 0.54665  | 0.37418  | 0.23801  | 0.2696   | 0.16155  |
| PFE1173c    | -0.30101 | 0.04641  | -0.06111 | -0.13556 | -0.01976 | -0.18716 | -0.20892 | -0.16063 | 0.09107  | 0.38291  | 0.41052  | 0.50969  | 0.58813  | 0.34997  | 0.44043  | 0.42191  | 0.46737  | 0.28145  | 0.43479  | 0.17768  | 0.17173  | 0.0813   | 0.18941  | 0.18584  |
| PFB0615c    | 0.1653   | 0.09398  | 0.54726  | 0.25178  | 0.37099  | 0.14543  | -0.01587 | 0.12988  | 0.37843  | 0.57889  | 0.49615  | 0.60359  | 0.58482  | 0.54812  | 0.31824  | 0.02168  | 0.3302   | 0.26318  | -0.315   | 0.06908  | 0.26646  | 0.42441  | 0.27332  | 0.42781  |
| PF13 0258   | 0.40868  | -0.00135 | 0.25044  | 0.42476  | 0.46029  | 0.37164  | -0.14688 | 0.17833  | -0.02484 | -0.15822 | -0.33684 | -0.26425 | -0.13709 | 0.05477  | 0.17953  | 0.49978  | 0.8205   | 0.4342   | 0.57381  | 0.54256  | 0.55429  |          |          |          |

|               |          |          |          |          |          |          |          |          |          |          |          |          |          |          |          |          |          |          |          |          |          |          |          |          |
|---------------|----------|----------|----------|----------|----------|----------|----------|----------|----------|----------|----------|----------|----------|----------|----------|----------|----------|----------|----------|----------|----------|----------|----------|----------|
| PFL1600c      | 0.54522  | 0.74562  | 0.66977  | 0.87673  | 0.97131  | 0.75128  | 0.70809  | 0.68416  | 0.28734  | 0.0365   | -0.27385 | -0.53491 | -0.61744 | -0.44225 | -0.49293 | -0.24993 | 0.35125  | 0.25974  | -0.20234 | 0.61509  | 0.78785  | 0.92895  | 1.01826  | 1.0196   |
| PF13 0285     | 0.31221  | 0.04685  | -0.07276 | 0.06516  | 0.0599   | 0.15858  | 0.16761  | 0.20445  | 0.23745  | 0.10701  | 0.03426  | -0.188   | -0.22117 | -0.27275 | -0.11767 | 0.12868  | 0.43528  | 0.51066  | 1.00572  | 0.69648  | 0.70685  | 0.55115  | 0.50588  | 0.30678  |
| PFA0335w      | -0.56031 | -0.72064 | -1.16064 | -1.07328 | -1.08613 | -1.16755 | -1.11731 | -0.97389 | -0.79267 | -0.65061 | -0.12711 | -0.09669 | 0.14868  | 0.20523  | 0.51768  | 0.67649  | 0.5439   | 0.67759  | 0.61572  | 0.22398  | -0.00581 | -0.53329 | -0.6656  | -0.80905 |
| PFI0195c      | -0.36306 | -0.00065 | 0.20129  | 0.08443  | -0.01176 | 0.08727  | 0.17229  | 0.14547  | 0.20132  | 0.13162  | 0.15819  | 0.29953  | 0.27485  | 0.19512  | 0.35885  | 0.02345  | -0.32473 | -0.33781 | -0.50616 | -0.65503 | -0.72128 | -0.45789 | -0.36951 | -0.32313 |
| PF14 0720     | -0.1373  | -0.33663 | -0.64379 | -0.54633 | -0.57572 | -0.57791 | -0.7117  | -0.50889 | -0.19005 | 0.00529  | 0.30861  | 0.53961  | 0.51347  | 0.50681  | 0.52422  | 0.53667  | 0.3405   | 0.47558  | 0.28768  | -0.00417 | -0.15691 | 0.05598  | -0.23213 | -0.2613  |
| PF14 0716     | -0.8905  | -0.65452 | -0.52343 | -0.48519 | -0.48896 | -0.36013 | -0.35571 | -0.39427 | -0.10452 | -0.01585 | 0.34016  | 0.49584  | 0.48585  | 0.26463  | 0.62277  | 0.45033  | -0.03021 | 0.05104  | 0.01001  | -0.30001 | -0.5055  | -0.77654 | -0.67861 | -0.66121 |
| PF10 0031     | -0.49455 | -0.48463 | -0.25679 | -0.19937 | -0.17125 | 0.01618  | -0.00289 | -0.73604 | -0.89111 | -0.59587 | -0.55051 | -0.29232 | -0.0724  | 0.51496  | 0.62677  | 0.72985  | 0.75305  | 0.59419  | 0.41336  | 0.56432  | 0.44293  | -0.00674 | -0.24952 | -0.54442 |
| PF08 0137     | 1.14661  | 1.02405  | 0.95682  | 0.92666  | 0.79374  | 0.78051  | 0.98052  | 1.08956  | 1.58776  | 1.28045  | 0.85219  | 0.61512  | 0.11857  | -0.5126  | -1.16414 | -1.30771 | -1.05824 | -1.50133 | -1.23229 | -0.73288 | -0.11304 | 0.23965  | 0.77824  | 1.05418  |
| PF08 0009     | -0.0413  | -0.3121  | -0.85321 | -0.6224  | -0.70259 | -0.6684  | -0.75657 | -0.71734 | -0.41516 | -0.21811 | -0.01331 | 0.25668  | 0.50329  | 0.61831  | 0.80403  | 0.92035  | 0.4348   | 0.91619  | 0.88348  | 0.61218  | 0.31167  | -0.04671 | -0.17123 | -0.28588 |
| PF14 0600     | 0.07935  | 0.10113  | -0.07826 | 0.18642  | 0.1882   | 0.28153  | 0.27973  | 0.74719  | 0.67523  | 0.39304  | 0.3803   | 0.41389  | 0.07166  | -0.002   | -0.07944 | 0.01566  | -0.34135 | 0.09478  | -0.0141  | -0.13888 | -0.2496  | -0.23956 | -0.00626 | -0.11881 |
| PF13 0228     | -0.26862 | 0.32352  | 0.76772  | 0.64354  | 0.77335  | 0.62349  | 0.85685  | 0.71654  | 0.57313  | 0.80609  | 0.9308   | 0.32942  | 0.26391  | 0.26679  | -0.02424 | -0.1596  | -0.13993 | -0.58115 | -1.34436 | -1.75156 | -1.67467 | -0.80546 | -0.86415 | -0.76906 |
| MAL7P1.174    | -2.4966  | -2.13634 | -1.48941 | -1.19069 | -0.25177 | 0.78326  | 1.29744  | 1.45537  | 1.71666  | 1.27488  | 1.03255  | 1.05615  | 0.39189  | -0.08034 | -0.56926 | -0.98955 | -1.50093 | -1.49267 | -1.79571 | -2.4806  | -2.64427 | -2.5524  | -2.56773 | -1.60031 |
| PF14 0103     | -0.34238 | -0.2806  | -0.69991 | -0.1186  | -0.17349 | -0.28311 | -0.5839  | 0.12729  | 0.18035  | 0.42163  | 0.49632  | 0.62868  | 0.77639  | 0.33895  | 0.42193  | 0.35922  | -0.04876 | 0.1284   | 0.21253  | -0.37664 | -0.26226 | -0.16887 | -0.15214 | -0.30464 |
| PFC10 API0012 | -0.21404 | -0.60521 | -0.8343  | -1.15327 | -0.96493 | -1.23536 | -1.17149 | -0.93782 | -1.05057 | -0.79219 | -0.82494 | -0.58425 | -0.39283 | 0.01937  | 0.34406  | 0.79008  | 0.96303  | 0.91009  | 0.28827  | 0.43316  | 0.14464  | 0.46306  | -0.225   | -0.51931 |
| PFL1955w      | -0.03835 | -0.42759 | 0.54939  | 1.09032  | 1.47403  | 2.67235  | 2.55502  | 1.86176  | 1.50363  | 0.94629  | 0.42725  | -0.14453 | -1.17909 | -1.73647 | -2.52955 | -2.40522 | -3.20001 | -2.90213 | -3.05535 | -2.64487 | -2.11248 | -1.66512 | -1.22679 | -0.47218 |
| PFI1500w      | -0.62022 | -0.78316 | -0.74142 | -0.90959 | -0.75076 | -0.5044  | -0.22113 | -0.27766 | 0.17654  | 0.44065  | 0.31575  | 0.52113  | 0.61385  | 0.83821  | 0.53763  | 0.45534  | 0.44274  | 0.32686  | -0.02211 | 0.24662  | 0.10579  | 0.04308  | -0.16223 | -0.41573 |
| PF14 0176     | -0.46488 | -0.5814  | -1.14742 | -0.05492 | -0.0246  | 0.13682  | -0.05422 | 0.04864  | 0.1419   | 0.17591  | 0.28105  | 0.37816  | 0.47066  | 0.49307  | 0.7827   | 0.67521  | 0.27274  | 0.34048  | 0.31886  | -0.19745 | -0.49729 | -0.3316  | -0.54327 | -0.62603 |
| PFI1695c      | -0.29129 | -0.20411 | 0.10769  | 0.17243  | -0.1378  | 0.16882  | 0.08318  | 0.23417  | 0.00399  | -0.006   | 0.14311  | 0.12736  | 0.45129  | 0.10708  | 0.5811   | 0.389    | -0.03804 | -0.15172 | -0.08719 | -0.50881 | -0.65742 | -0.75084 | -0.42195 | -0.30597 |
| PF14 0339     | -0.19798 | -0.48533 | -0.20944 | -0.25567 | -0.26709 | -0.16268 | 0.01357  | 0.10926  | 0.56503  | 0.904    | 0.92639  | 0.92636  | 0.86302  | 0.52729  | 0.33147  | 0.28337  | -0.22225 | -0.03726 | 0.05271  | -0.05781 | -0.03348 | -0.17562 | -0.13734 | -0.08563 |
| MAL8P1.204    | 1.79418  | 1.93912  | 1.47026  | 1.36092  | 1.26343  | 0.93576  | 0.66199  | 0.3737   | -0.15883 | -0.55102 | -0.72233 | -0.72399 | -0.50705 | -0.32506 | -0.02167 | 0.08097  | -0.12084 | 0.07326  | -0.02695 | 0.00677  | 0.31451  | 0.8421   | 0.94125  | 1.06338  |
| PF11 0385     | -0.37735 | -0.34921 | 0.04269  | -0.34101 | -0.56763 | 0.06581  | 0.38355  | 0.9086   | 1.03875  | 0.83362  | 0.99771  | 1.01615  | 0.95059  | 0.62225  | 0.52941  | 0.36144  | 0.1567   | 0.04519  | 0.15336  | -0.2933  | -0.31191 | -0.05245 | -0.28085 | -0.34954 |
| PF14 0114     | -0.27302 | -0.33607 | -0.86937 | -0.34134 | -0.39944 | -0.44278 | -0.18926 | 0.18778  | 0.32487  | 0.40581  | 0.4253   | 0.24683  | 0.45158  | 0.46341  | 0.45839  | 0.38871  | 0.37549  | 0.23872  | 0.04686  | -0.16423 | -0.242   | -0.22797 | -0.37647 | -0.48487 |
| PF14 0222     | 1.15962  | 0.64607  | 0.33684  | 0.16124  | -0.09471 | -0.43702 | -0.62538 | -0.91964 | -0.95826 | -0.97377 | -0.97168 | -0.99156 | -1.02068 | -1.15659 | -0.86591 | -0.3671  | 0.34725  | 0.83353  | 1.48762  | 1.3414   | 1.33453  | 1.09434  | 1.21992  | 0.85838  |
| PF10 0104     | -0.46007 | -0.06993 | 0.27179  | 0.19032  | 0.21167  | 0.32768  | 0.46899  | 0.45537  | 0.4581   | 0.36781  | 0.47187  | 0.43217  | 0.41946  | 0.32177  | 0.51938  | 0.38033  | -0.08778 | -0.26873 | -0.03934 | -0.3616  | -0.56938 | -0.3855  | -0.4141  | -0.31113 |
| PFL0885w      | 0.63128  | 0.42699  | 0.27613  | 0.45291  | 0.34898  | 0.08483  | -0.14265 | -0.10339 | -0.3776  | -0.36904 | -0.53906 | -0.56518 | -0.68582 | -0.75356 | -0.66341 | -0.16404 | 0.18298  | 0.13389  | 0.70533  | 0.57696  | 0.66124  | 0.62384  | 0.70405  | 0.50464  |
| PF14 0374     | 0.79841  | -0.20855 | -0.3333  | -0.03808 | -0.18406 | -0.70336 | -1.14724 | -1.46514 | -2.2292  | -2.49748 | -2.49168 | -2.52184 | -2.49899 | -2.25501 | -2.12817 | -1.38182 | -0.50403 | -0.55616 | 0.89676  | 1.20076  | 1.27117  | 1.14961  | 1.7247   | 1.71502  |
| PF10 0047     | -1.67672 | -1.37701 | -1.18138 | -1.44778 | -1.11447 | -0.78455 | -0.15261 | 0.34777  | 0.99556  | 1.07987  | 0.94458  | 0.97671  | 0.85742  | 0.51986  | -0.05939 | -0.44206 | -0.44018 | -0.47576 | -1.23589 | -0.87341 | -0.99051 | -1.07177 | -1.17102 | -1.3501  |
| PF14 0727     | 0.03585  | 0.36138  | 0.18957  | 0.21963  | 0.94404  | 0.79504  | 0.5005   | 0.34945  | 0.32928  | 0.14251  | 0.21377  | -0.45944 | -0.30093 | -0.53577 | -0.61819 | -0.48185 | 0.68071  | -0.00302 | -0.04035 | 0.18199  | 0.8791   | 0.88352  | 0.9982   | 1.30788  |
| PF07 0087     | -2.24962 | -2.46204 | -2.44589 | -2.86306 | -2.95664 | -2.7385  | -1.90436 | -1.14517 | -0.64783 | -0.23654 | 0.18947  | 0.40363  | 0.78851  | 0.979    | 0.97282  | 0.73433  | 0.40144  | 0.42383  | -0.39885 | -0.95996 | -1.3977  | -1.72412 | -1.99927 | -2.05152 |
| PF14 0697     | -0.00117 | 0.10323  | 0.13998  | 0.6274   | 0.75228  | 0.76328  | 0.56818  | 0.40776  | 0.42723  | 0.27691  | 0.54685  | -0.009   | -0.11527 | -0.15252 | -0.33551 | -0.20706 | -0.54255 | -0.15123 | 0.10966  | 0.28596  | 0.74053  | 0.95799  | 1.01019  | 1.14605  |
| MAL13P1.323   | 0.37752  | 0.3326   | 0.52524  | 0.39213  | 0.40435  | 0.5255   | 0.53267  | 0.38475  | 0.84521  | 0.79788  | 0.48283  | 0.56802  | 0.57806  | 0.58422  | 0.18516  | 0.01896  | -0.05681 | -0.35756 | -0.07651 | -0.04234 | 0.10824  | 0.16607  | 0.16607  | 0.10806  |
| PF07 0022     | -0.4251  | -0.64074 | -0.01371 | -0.60222 | -0.33867 | -0.48494 | -0.52877 | 0.39231  | 1.18096  | 1.30374  | 1.12069  | 1.09221  | 0.98442  | 0.7517   | 0.42323  | 0.1546   | -0.0177  | 0.02449  | -0.29209 | -0.20877 | -0.34164 | -0.29125 | -0.25205 | -0.29993 |
| PF08 0140     | 0.03666  | 0.1136   | 0.35533  | 0.35098  | 0.48567  | 0.57169  | 0.42345  | 0.20452  | 0.72305  | 0.69857  | 0.54797  | 0.67949  | 0.49859  | 0.59357  | 0.46898  | 0.57655  | 0.63576  | 0.69525  | 0.25574  | 0.44411  | 0.43246  | 0.21804  | -0.15794 | -0.23351 |
| PFF0910c      | -0.31115 | -0.55634 | -0.66399 | -0.83089 | -0.78204 | -0.87446 | -0.53785 | 0.11352  | 0.62506  | 0.85804  | 0.85538  | 1.00734  | 0.47962  | 0.46291  | 0.23765  | 0.33433  | 0.34759  | 0.3846   | 0.33299  | 0.30607  | 0.14388  | -0.10065 | -0.09655 | -0.31143 |
| PFL0730w      | 0.06293  | 0.3711   | 0.29341  | 0.58861  | 0.61805  | 1.08317  | 0.87823  | 1.23277  | 0.89346  | 0.7199   | 0.55609  | 0.47866  | 0.48598  | 0.28296  | 0.2299   | 0.00965  | 0.37454  | -0.40814 | 0.17966  | -0.15087 | -0.00393 | 0.10377  | 1.2381   | 1.7428   |
| PFE0045c      | 0.56372  | 0.06969  | -0.446   | -0.73729 | -0.90066 | -1.14953 | -1.38957 | -1.36149 | -1.60126 | -1.67225 | -1.83374 | -1.73445 | -1.6248  | -1.39558 | -0.56637 | 0.41241  | 0.95925  | 0.86322  | 1.64706  | 1.16663  | 1.26285  | 1.01064  | 0.62072  | 0.14566  |
| PFE0370c      | 0.70524  | -0.01304 | -0.59772 | -0.53662 | -0.85163 | -1.26685 | -1.70681 | -1.98942 | -2.65155 | -3.09073 | -3.33914 | -3.46425 | -3.37244 | -2.26755 | -3.14618 | -2.3622  | -1.09911 | -0.29698 | 1.63157  | 1.25052  | 1.42488  | 1.24912  | 1.46661  | 1.32903  |
| PFL1015w      | 0.30438  | 0.1129   | -0.03539 | -0.05974 | 0.20294  | -0.15045 | -0.35786 | -0.285   | -0.5364  | -0.62925 | -0.70377 | -0.94351 | -0.74873 | -0.60523 | -0.31226 | -0.10259 | -0.1966  | 0.3149   | 0.07916  | 0.4475   | 0.70082  | 0.49404  | 0.37508  | 0.37831  |
| PFL11 0337    | 0.03883  | -0.00481 | 0.24181  | 0.37725  | 0.54796  | 0.8827   | 0.72319  | 0.31643  | 0.20182  | 0.20074  | 0.34965  | 0.28653  | 0.4638   | 0.37997  | 0.49632  | 0.4122   | 0.07857  | 0.56671  | 0.66394  | 0.35526  | 0.18624  | -0.00542 | 0.02796  | 0.08355  |
| PFL0830w      | 0.91863  | 1.08934  | 1.22509  | 1.12872  | 1.11273  | 0.94271  | 0.93023  | 1.01687  | 0.90088  | 0.84254  | 0.53589  | 0.40871  | 0.16249  | 0.06626  | -0.33223 | -0.69858 | -0.73073 | -0.83562 | -1.32005 | -0.58457 | -0.09266 | 0.22447  | 0.48625  | 0.76771  |
| PFE0210c      | 0.57203  | 0.48826  | 0.23277  | 0.24729  | 0.49998  | 0.56919  | 0.42143  | 0.50857  | 0.31829  | 0.16255  | 0.18493  | 0.1051   | 0.13651  | 0.23818  | 0.1509   | 0.29074  | 0.23579  | 0.55524  | 0.67424  |          |          |          |          |          |

|               |          |          |          |          |          |          |          |          |          |          |          |          |          |          |          |          |          |          |          |          |          |          |          |          |
|---------------|----------|----------|----------|----------|----------|----------|----------|----------|----------|----------|----------|----------|----------|----------|----------|----------|----------|----------|----------|----------|----------|----------|----------|----------|
| PFE0485w      | 0.25187  | 0.16436  | 0.0711   | -0.015   | -0.01743 | -0.10768 | -0.10328 | -0.05298 | -0.07057 | -0.12174 | -0.15246 | -0.32438 | -0.28936 | -0.35324 | -0.58113 | -0.64119 | -0.42056 | -0.06823 | 0.154    | 0.43779  | 0.35234  | 0.3672   | 0.30406  | 0.45937  |
| PFI0625c      | 0.30757  | 0.83419  | 1.03771  | 1.36889  | 1.35776  | 1.32012  | 1.30633  | 1.6618   | 1.29581  | 1.02556  | 0.98817  | 0.66477  | 0.37408  | 0.27885  | 0.1498   | -0.06748 | -0.3748  | -0.40975 | -0.39599 | -0.57163 | -0.54619 | -0.21397 | 0.03715  | 0.27682  |
| PFE0290c      | -0.60347 | -0.42002 | -0.56772 | -0.2395  | -0.12513 | -0.21397 | -0.0694  | 0.04077  | 0.21409  | 0.2905   | 0.69983  | 0.7557   | 0.90566  | 0.60377  | 0.63933  | 0.35313  | -0.15438 | 0.10196  | 0.13048  | -0.30698 | -0.5453  | -0.59449 | -0.61074 | -0.41558 |
| PFE1175w      | -0.06906 | -0.15405 | -0.43477 | -0.61095 | -0.67271 | -0.50893 | -0.57949 | -0.08089 | 0.15687  | 0.26046  | 0.29707  | 0.3968   | 0.30252  | 0.32284  | 0.38063  | 0.60052  | 0.39819  | 0.4929   | 0.67022  | 0.39416  | 0.25615  | -0.06889 | -0.02069 | -0.10418 |
| PF11 0317     | -1.12856 | -1.12051 | -1.03162 | -1.0898  | -0.93231 | -1.04263 | -0.88458 | -0.85673 | -0.31796 | 0.08774  | 0.39544  | 0.51955  | 0.80727  | 0.82031  | 0.77264  | 0.48083  | 0.43796  | 0.16605  | -0.60722 | -0.43074 | -0.58971 | -0.7735  | -0.89422 | -0.99396 |
| PFL2005w      | -0.78212 | -0.81083 | -0.939   | -1.01346 | -1.06897 | -0.97207 | -0.97169 | -0.52281 | -0.06586 | 0.1345   | 0.69131  | 0.91734  | 0.8315   | 0.86096  | 0.80491  | 0.60068  | 0.06661  | 0.2616   | 0.07311  | -0.38235 | -0.6041  | -0.82967 | -0.80542 | -0.8852  |
| PFI0 0230     | -0.40715 | -0.92136 | -0.31448 | -0.26124 | -0.81906 | -0.79251 | -0.83156 | -0.45092 | -0.8845  | -0.74247 | -0.70655 | -0.77338 | -0.17972 | -0.71672 | -0.76432 | -1.12531 | -1.55913 | -0.86308 | -0.75744 | -0.60461 | -0.54623 | -0.7805  | -0.23302 | -0.25663 |
| PF07 0064     | -1.20504 | -1.18661 | -1.11228 | -1.44373 | -1.44648 | -1.4173  | -1.04191 | -0.62907 | -0.39907 | -0.1593  | 0.27774  | 0.42752  | 0.6201   | 0.76034  | 0.87693  | 0.71483  | 0.47608  | 0.40351  | 0.14899  | -0.2978  | -0.78514 | -0.72662 | -0.90031 | -0.80783 |
| PF11 0256     | 0.18646  | 0.27227  | -1.53977 | 0.67629  | 0.68842  | 0.4923   | 0.70794  | 0.53529  | 0.33469  | 0.26621  | 0.13165  | 0.2149   | 0.29143  | 0.35661  | 0.36863  | 0.34701  | 0.25117  | 0.25308  | 0.19179  | 0.06058  | 0.08302  | 0.17559  | 0.10583  | 0.43326  |
| PF0370w       | 0.27979  | 0.5718   | 0.38052  | 1.1167   | 1.28306  | 1.07082  | 0.94075  | 1.06483  | 0.80576  | 0.7505   | 0.78361  | 0.66716  | 0.47325  | 0.28756  | 0.21456  | -0.08296 | 0.15074  | -0.09373 | -0.13262 | -0.37461 | -0.26055 | -0.1355  | 0.06041  |          |
| PF14 0389     | 0.41001  | 0.60791  | 0.79557  | 1.03961  | 1.3885   | 1.45507  | 1.30823  | 1.37094  | 1.0551   | 0.88331  | 0.83712  | 0.80701  | 0.491    | 0.26157  | 0.02259  | -0.07459 | -0.53352 | -0.59588 | -0.4714  | -0.98233 | -0.80492 | -0.56015 | -0.10038 | 0.25188  |
| PF08 0048     | -0.00735 | 0.33714  | 0.65433  | 0.50464  | 0.50637  | 0.68253  | 0.64465  | 0.5218   | 0.61079  | 0.71865  | 0.73796  | 0.72436  | 0.71459  | 0.64072  | 0.33976  | 0.01163  | -0.06368 | -0.50815 | -0.72647 | -0.85689 | -0.67639 | -0.21766 | -0.19205 | -0.01412 |
| PFE1155c      | -0.63876 | -0.53783 | -0.42017 | -0.46621 | -0.28889 | -0.12348 | -0.10737 | -0.04402 | 0.24988  | 0.46565  | 0.71071  | 0.81806  | 0.77627  | 0.58375  | 0.49886  | 0.31375  | -0.13408 | -0.28535 | -0.06008 | -0.42037 | -0.55881 | -0.63639 | -0.52335 | -0.27541 |
| MAL1 28s      | 0.68722  | 0.44074  | 0.17043  | 0.3972   | 0.42681  | 0.22516  | -0.06919 | 0.22206  | -0.4007  | -0.64255 | -0.53614 | -0.81899 | -0.90258 | -0.91702 | -0.72609 | -0.60957 | -0.38487 | -0.59344 | 0.12445  | -0.01265 | 0.37278  | 0.54576  | 0.35013  | 0.54662  |
| PF14 0501     | -0.19209 | -0.01076 | 0.24666  | 0.10463  | 0.02507  | 0.29769  | 0.05148  | -0.30964 | -0.28704 | -0.2955  | -0.2114  | -0.10487 | 0.13885  | 0.34348  | 0.13488  | 0.25548  | 0.52516  | 0.21446  | -0.03381 | 0.21196  | 0.13622  | 0.17396  | -0.0103  | -0.21605 |
| PF11 0436     | 0.27693  | 0.58619  | 0.88691  | 0.62932  | 0.60022  | 0.71378  | 0.532    | 0.37725  | 0.13288  | 0.04748  | 0.3956   | 0.37434  | 0.334    | -0.05050 | 0.24602  | 0.28259  | -0.07227 | 0.10523  | 0.24102  | -0.14807 | -0.33092 | -0.16351 | -0.14264 | -0.09827 |
| PFB0305c      | 0.40818  | -0.19072 | -0.49268 | -0.94963 | -0.85459 | -1.35291 | -1.62474 | -1.49403 | -1.7182  | -1.87419 | -1.84168 | -1.8146  | -1.66408 | -2.03155 | -1.75812 | -1.61561 | -1.08532 | -0.63624 | 1.62377  | 0.87209  | 0.9975   | 0.61643  | 0.93842  | 1.22746  |
| PF13 0123     | 0.55264  | 0.96354  | 0.29934  | 1.07835  | 1.2462   | 1.15469  | 1.23436  | 1.00281  | 0.75198  | 0.58463  | 0.49828  | 0.35029  | 0.28941  | 0.11263  | -0.19712 | -0.4402  | -0.12005 | 0.0841   | 0.31719  | 0.62969  | 0.51012  | 0.79182  | 0.99142  |          |
| PFL1820w      | 0.63945  | 0.75891  | 0.67078  | 0.63758  | 0.75051  | 0.80749  | 0.80781  | 0.97456  | 0.9207   | 0.70027  | 0.67552  | 0.31682  | 0.06886  | -0.33382 | -0.36358 | -0.46838 | -0.47841 | -0.53632 | -0.38969 | -0.32273 | -0.12247 | 0.22626  | 0.36874  | 0.66406  |
| PFC10 API0029 | -0.5868  | -1.20902 | -1.44613 | -1.3055  | -0.55572 | -0.7409  | -1.371   | -0.39197 | -1.54987 | -0.97993 | -1.15443 | -0.82424 | -0.8471  | -0.26873 | -0.33537 | 0.43268  | 0.8545   | 0.94612  | -0.13001 | 0.22817  | 0.40224  | 1.04942  | 0.34652  | 0.10685  |
| PFF0295c      | 1.02619  | 1.15503  | 0.97094  | 1.25555  | 1.13284  | 0.91822  | 0.79334  | 0.72703  | 0.10891  | -0.46041 | -0.56823 | -0.94889 | -1.25743 | -1.36619 | -1.36309 | -1.13697 | -0.75851 | -0.75888 | 0.07616  | 0.09244  | 0.59176  | 0.77936  | 0.88155  | 0.94127  |
| PFF0250w      | 0.5204   | 0.59115  | 0.14801  | 0.87847  | 0.99471  | 0.55936  | 0.45561  | 1.10401  | 0.82591  | 0.66191  | 0.47618  | 0.4027   | -0.59479 | -0.82611 | -0.8874  | -0.54796 | -0.69842 | 0.30629  | 0.31101  | 0.41629  | 0.37774  | 0.21764  | 0.40852  | 0.30605  |
| PFC0235w      | 0.16883  | 0.08494  | 0.30609  | 0.22648  | 0.20653  | 0.33373  | 0.40269  | 0.39292  | 0.4322   | 0.45276  | 0.07807  | -0.17882 | -0.40884 | -0.44312 | -0.39172 | -0.06096 | 0.56066  | 0.04159  | 0.29748  | 0.55876  | 0.61199  | 0.36012  | 0.3601   | 0.20619  |
| PFE1250w      | 0.10171  | 0.04509  | -0.14213 | -0.29825 | -0.57214 | -0.75117 | -0.78468 | -0.55424 | -0.3283  | -0.30757 | -0.10016 | -0.06032 | 0.03414  | -0.1185  | -0.08868 | -0.25556 | -0.57002 | -0.55675 | 0.32098  | 0.00309  | 0.02889  | 0.13035  | 0.38212  | 0.44723  |
| PF14 0660     | 0.54751  | 0.00997  | -0.37908 | -0.44592 | -0.67396 | -0.98394 | -1.1728  | -1.65316 | -1.49631 | -2.19905 | -2.07384 | -1.85227 | -2.02649 | -1.92637 | -1.42779 | -0.95326 | -0.16295 | -0.0755  | 1.65287  | 1.16439  | 1.01058  | 0.95354  | 1.24448  | 1.14415  |
| PFL1165w      | 1.27007  | 0.47151  | 0.2107   | -0.08233 | -0.14666 | -0.47347 | -0.70648 | -0.53606 | -0.73683 | -1.44347 | -1.00687 | -1.14342 | -1.46121 | -1.4071  | -1.2536  | -1.0957  | -0.38462 | -0.17081 | 1.50636  | 1.03346  | 1.26702  | 1.35946  | 1.4177   | 1.39627  |
| PF14 0131     | 0.76261  | 0.9984   | 0.76453  | 1.07288  | 1.01657  | 0.81472  | 0.73021  | 0.57343  | 0.23051  | -0.10389 | -0.31925 | -0.47437 | -0.44617 | -0.37337 | -0.46019 | -0.53791 | -0.02485 | -0.04572 | -0.29454 | 0.36219  | 0.80423  | 0.87536  | 1.12382  | 1.35582  |
| PF07 0040     | 0.03931  | -0.09455 | 0.08947  | -0.41143 | -0.45074 | -0.43932 | -0.61513 | -0.84673 | -1.12728 | -1.01796 | -0.54741 | -0.40287 | -0.19373 | 0.01729  | 0.58057  | 0.7789   | 0.75623  | 0.54895  | 0.89858  | 0.5585   | 1.17027  | 0.05604  | 0.11866  | -0.02175 |
| PF0530w       | 0.31228  | 0.34156  | 0.45929  | 0.71679  | 0.66301  | 0.59903  | 0.46879  | 0.54102  | 0.54295  | 0.72983  | 0.81735  | 0.80258  | 0.49093  | 0.13558  | -0.14598 | -0.4553  | -0.82661 | -1.09551 | -0.73079 | -0.85312 | -0.43506 | -0.25895 | 0.01751  | 0.22966  |
| PFC0225c      | -0.09604 | 0.01635  | -0.03994 | 0.12656  | 0.23366  | 0.48887  | 0.60543  | 0.41267  | 0.32534  | 0.28692  | 0.19373  | 0.21907  | 0.27247  | 0.27896  | 0.47942  | 0.40022  | 0.44412  | 0.23415  | 0.55601  | 0.43264  | 0.35076  | 0.28142  | 0.33072  | 0.21981  |
| PF13 0262     | -0.57255 | -0.33307 | 0.02649  | 0.07541  | 0.111    | 0.34344  | 0.29958  | 0.48879  | 0.59396  | 0.63501  | 0.86083  | 0.83781  | 0.85883  | 0.46722  | 0.43601  | 0.13868  | -0.52737 | -0.58599 | -0.65247 | -1.28015 | -1.27542 | -0.88899 | -0.97356 | -0.70758 |
| PFF0460w      | -0.56243 | -0.70192 | -0.49731 | -0.78938 | -0.82508 | -0.84264 | -1.05125 | -0.45412 | 0.01276  | 0.27902  | 0.34369  | 0.60198  | 0.61972  | 0.7075   | 0.55591  | 0.49388  | 0.58402  | 0.25388  | 0.01125  | -0.0455  | -0.21496 | -0.27363 | -0.33399 | -0.42837 |
| PF10 0281     | 1.46462  | 0.32018  | -0.47009 | -1.17976 | -1.60915 | -1.94339 | -2.5009  | -2.84972 | -3.36224 | -3.69816 | -3.66495 | -3.54679 | -3.22127 | -3.03    | -2.43279 | -1.94037 | -1.40475 | -0.03201 | 1.11384  | 1.48686  | 1.55327  | 1.37006  | 2.00352  | 1.36015  |
| PFC10125w     | -0.81956 | -0.88358 | -0.78517 | -0.82253 | -0.75505 | -0.8018  | -0.36357 | 0.24055  | 0.58739  | 0.91753  | 0.89307  | 1.10841  | 0.77306  | 0.82803  | 0.46219  | 0.2238   | 0.07075  | 0.12227  | -0.24341 | -0.22713 | -0.61008 | -0.7669  | -0.74044 | -0.64319 |
| PF13 0301     | 0.07222  | -0.36856 | -0.4103  | -1.3918  | -1.57904 | -1.83189 | -1.75814 | -1.91278 | -2.10133 | -2.12776 | -1.9587  | -1.91191 | -1.60173 | -1.54669 | -0.68403 | 0.2673   | 0.15329  | 0.97796  | 0.10723  | 0.51981  | 0.37705  | 0.32899  | -0.09611 | -0.47892 |
| PFD1150c      | 1.59525  | 1.33869  | 1.32294  | 0.82208  | 0.63885  | 0.17878  | -0.05272 | -0.40463 | -0.24801 | -0.24879 | -0.44019 | -0.34881 | -0.29864 | -0.61079 | -0.78044 | -0.96395 | -0.78324 | -0.59193 | 0.24199  | 0.7136   | 1.05422  | 1.27471  | 1.42097  | 1.43791  |
| PF14 0241     | -0.31445 | 0.1088   | 0.16953  | 0.653    | 0.31628  | 0.76695  | 0.807    | 1.04907  | 1.40301  | 1.19452  | 1.30051  | 1.60787  | 0.80127  | 0.40313  | -0.13604 | -0.52893 | -1.31201 | -1.27193 | -1.50026 | -1.61538 | -1.47084 | -1.05489 | -0.76342 | -0.68304 |
| PF13 0330     | 0.02165  | 0.36478  | 0.59007  | 1.01576  | 0.83672  | 1.32393  | 0.96635  | 1.11964  | 1.30432  | 1.11055  | 1.07019  | 0.8555   | 0.70911  | 0.26015  | 0.08846  | 0.00339  | -0.32833 | -0.37294 | -0.29066 | -0.5357  | -0.51731 | -0.07822 | 0.02811  | 0.04314  |
| PFD0810w      | -0.94281 | -0.67693 | -0.47405 | -0.4858  | -0.27202 | -0.11075 | -0.05252 | 0.24044  | 0.05226  | -0.07213 | 0.08781  | 0.25652  | 0.3678   | 0.42069  | 0.80171  | 0.60368  | 0.17667  | 0.29193  | -0.15338 | -0.54342 | -0.79623 | -1.11829 | -1.1628  | -1.05578 |
| MAL13P1.57    | 0.10894  | 0.38166  | 0.31054  | 0.77388  | 0.71871  | 0.62428  | 0.72485  | 0.76813  | 0.56161  | 0.40134  | 0.37281  | 0.37265  | 0.23895  | 0.09972  | 0.2794   | 0.31114  | -0.03642 | 0.16461  | 0.52012  | 0.36631  | 0.32422  | 0.25461  | 0.25905  | 0.22901  |
| PFI0390c      | 0.09654  | -0.53117 | -0.37146 | -0.42357 | -0.53628 | -0.64436 | -0.75806 | -0.74908 | -0.69633 | -0.38714 | -0.01904 | 0.34663  | 0.31157  | 0.29989  | 0.28369  | 0.35401  | 0.42426  | 0.52817  | 0.70275  | 0.6153   | 0.29109  | 0.2937   | 0.40023  |          |

|             |          |          |          |          |          |          |          |          |          |          |          |          |          |          |          |          |          |          |          |          |          |          |          |          |
|-------------|----------|----------|----------|----------|----------|----------|----------|----------|----------|----------|----------|----------|----------|----------|----------|----------|----------|----------|----------|----------|----------|----------|----------|----------|
| PF10_0138   | 0.85281  | -0.02949 | -0.67649 | -0.6416  | -0.80356 | -1.34318 | -1.52161 | -2.07681 | -2.68834 | -3.1005  | -3.20033 | -3.3537  | -3.51247 | -3.50447 | -3.21629 | -2.22112 | -0.74398 | -0.5236  | 1.56636  | 1.57932  | 1.40705  | 1.14025  | 1.62415  | 1.53233  |
| PF14_0558   | -0.51656 | -0.74654 | -0.69857 | -0.79    | -0.93832 | -0.95384 | -0.89529 | -1.23334 | -1.29149 | -0.99535 | -0.8057  | -0.50706 | 0.05145  | 0.65189  | 0.70255  | 0.74969  | 0.73345  | 0.71967  | 0.19762  | 0.3934   | 0.26204  | 0.04439  | -0.29036 | -0.51359 |
| MAL8P1.92   | 1.16671  | 1.14536  | 1.38394  | 1.4839   | 1.42065  | 1.39712  | 1.11836  | 1.25876  | 0.94206  | 0.83637  | 0.59464  | 0.4255   | 0.30124  | 0.07934  | -0.25715 | -0.54478 | -0.72253 | -0.83319 | -0.82956 | -0.29426 | 0.1746   | 0.39139  | 0.83059  | 1.06614  |
| MAL7P1.156  | 0.35487  | 0.60702  | 0.55318  | 0.20729  | 0.80746  | 0.2692   | 0.70952  | 0.25439  | -0.16411 | -0.12877 | 0.03101  | 0.07484  | -0.18608 | 0.0285   | 0.12112  | 0.10444  | -0.01182 | 0.46228  | 0.07648  | 0.28515  | 0.53891  | 0.68443  | 0.81736  | 0.84485  |
| PF08_0112   | -0.16238 | 0.03543  | 0.05479  | 0.07037  | 0.14565  | 0.4381   | 0.42159  | 0.29962  | 0.33517  | 0.17316  | 0.23492  | 0.37819  | 0.47532  | 0.4594   | 0.58032  | 0.60736  | 0.39003  | 0.37209  | 0.46721  | 0.11837  | -0.07427 | -0.30928 | -0.39864 | -0.3533  |
| PF10_0057   | -0.95777 | -0.80492 | -0.49945 | -0.66395 | -0.4851  | -0.27672 | -0.15492 | -0.24025 | 0.01397  | 0.10776  | 0.32452  | 0.50998  | 0.6427   | 0.62807  | 0.64131  | 0.44459  | 0.33896  | 0.06687  | -0.16502 | -0.16964 | -0.34868 | -0.2794  | -0.38899 | -0.52025 |
| PFD1070w    | 0.44572  | 0.69219  | 0.48321  | 0.77858  | 0.62657  | 0.81458  | 0.69519  | 0.84094  | 0.86785  | 0.90295  | 0.10017  | 0.91193  | 0.81043  | 0.39855  | 0.21124  | 0.01775  | -0.3781  | -0.34029 | -0.22074 | -0.52573 | -0.46563 | -0.22447 | 0.06155  | 0.30013  |
| PF11_0149   | 0.29295  | -0.23737 | -0.06695 | -0.28648 | -0.23833 | -0.28883 | -0.39456 | -0.4653  | -0.38834 | -0.44366 | -0.13016 | -0.29103 | 0.0313   | 0.06001  | 0.2568   | 0.23397  | -0.32858 | -0.09966 | 0.67299  | 0.35732  | 0.21728  | 0.21783  | 0.3934   | 0.85752  |
| PF10_0276   | -0.58209 | -0.66611 | -0.56829 | -0.96953 | -1.04797 | -1.09668 | -1.17437 | -1.13405 | -1.01894 | -0.848   | -0.35806 | -0.28481 | 0.16724  | 0.25273  | 0.8628   | 0.94609  | 0.7056   | 0.59877  | 0.99524  | 0.5854   | 0.1052   | -0.42799 | -0.4595  | -0.62593 |
| PF14_0592   | -0.84942 | -0.51728 | -1.05852 | -1.00612 | -1.0005  | -1.21018 | -0.91012 | -0.36041 | -0.23212 | 0.05161  | 0.35009  | 0.32415  | 0.33048  | 0.36403  | 0.66855  | 0.57426  | 0.39831  | 0.36789  | 0.23675  | -0.03332 | -0.30014 | -0.61131 | -0.68136 | -0.70222 |
| PF14_0704   | -0.00912 | 0.36634  | 0.60431  | 0.96903  | 0.97871  | 0.909    | 0.98077  | 0.87901  | 0.73524  | 0.92334  | 0.77802  | 0.66858  | 0.39631  | 0.16637  | -0.09206 | -0.16596 | -0.51143 | -0.37183 | -0.5934  | -0.58571 | -0.56644 | -0.26064 | -0.08454 | 0.08435  |
| PF14_0157   | 0.4201   | 0.88237  | 0.92681  | 0.95229  | 0.96706  | 1.05627  | 0.92077  | 1.06148  | 0.81572  | 0.61566  | 0.6854   | 0.35104  | 0.2972   | -0.08703 | 0.0372   | -0.16064 | -0.17009 | -0.21199 | -0.19473 | -0.38674 | -0.15237 | -0.1103  | 0.172    | 0.50323  |
| PFL1160c    | -0.21624 | -0.87551 | -0.82699 | -1.39046 | -1.6198  | -1.98867 | -1.25257 | -2.24234 | -2.54329 | -2.2371  | -2.28351 | -2.358   | -1.83565 | -1.00932 | 0.14674  | 0.80326  | 0.90807  | 1.0592   | 0.8684   | 0.73272  | 0.56965  | 0.16096  | -0.14673 | -0.51272 |
| PF10_0295   | 0.67422  | 0.04384  | -0.46008 | -0.24737 | -0.40019 | -0.82372 | -1.16366 | -1.33297 | -2.08528 | -2.51658 | -2.37652 | -2.85598 | -3.05783 | -3.03492 | -2.49095 | -1.60948 | -0.70044 | -0.46046 | 1.93831  | 1.12176  | 1.1603   | 1.03639  | 1.34067  | 1.45371  |
| PFA0410w    | 0.00317  | 0.15357  | 0.25433  | 0.31242  | 0.23098  | 0.3633   | 0.45609  | 0.22117  | 0.52463  | 0.43516  | 0.27908  | 0.41817  | 0.33542  | 0.19616  | -0.06711 | -0.36493 | -0.30425 | -0.48713 | -0.7183  | -0.28499 | -0.12598 | -0.02402 | 0.11385  | -0.05337 |
| PFB0820c    | -0.27725 | -0.22364 | -0.60891 | -0.00271 | 0.10331  | 0.45085  | 0.58118  | 0.51344  | 0.80505  | 0.65602  | 0.50034  | 0.52127  | 0.56917  | 0.64933  | 0.40699  | 0.33956  | 0.37572  | 0.28199  | 0.06644  | 0.11185  | -0.07108 | -0.1857  | -0.10212 | -0.15931 |
| PF14_0312   | -0.24401 | -0.16206 | -0.15057 | 0.00754  | 0.17632  | 0.10161  | 0.21696  | 0.34516  | 0.26787  | 0.44587  | 0.5566   | 0.55312  | 0.4708   | 0.55212  | 0.36746  | 0.30415  | 0.13547  | 0.22779  | 0.16032  | -0.07022 | -0.05267 | -0.36078 | -0.40602 | -0.32572 |
| MAL13P1.210 | -0.27692 | -0.63148 | -0.54762 | -0.57774 | -0.46439 | -0.46602 | -0.50247 | -0.19478 | -0.23581 | 0.49746  | 0.52294  | 0.83453  | 0.57152  | 0.67768  | 0.5154   | 0.51423  | 0.43943  | 0.35561  | 0.46237  | 0.23135  | -0.05158 | -0.13644 | -0.23263 | -0.40812 |
| PFB0720c    | -0.95749 | -0.98768 | -0.94373 | -1.23498 | -1.24573 | -1.19532 | -1.1812  | -0.93807 | -0.41326 | 0.14629  | 0.39571  | 0.43258  | 0.70985  | 0.74552  | 0.74263  | 0.57902  | 0.3095   | 0.27966  | 0.01981  | -0.13314 | -0.59325 | -0.70519 | -0.67536 | -0.89201 |
| PF13_0186   | 0.13868  | 0.18106  | 0.17884  | 0.50426  | 0.31241  | 0.33802  | 0.07732  | -0.17901 | 0.09737  | 0.13926  | 0.41233  | 0.47703  | 0.20382  | -0.2066  | -0.24461 | -0.41901 | -0.46871 | -0.2096  | 0.38726  | 0.17846  | 0.24689  | 0.09598  | 0.23156  | 0.34058  |
| PF13_0221   | -0.08683 | -0.03227 | -0.17364 | 0.28853  | 0.54668  | 0.52916  | 0.68931  | 0.90453  | 0.89393  | 0.50504  | 0.28829  | 0.28441  | 0.4108   | 0.41236  | 0.09945  | -0.04537 | 0.1724   | 0.16809  | 0.00805  | 0.27148  | 0.2199   | 0.16725  | 0.28463  | 0.18284  |
| PF11_0079   | -0.1721  | -0.09234 | -0.31781 | 0.02417  | -0.07489 | 0.20847  | 0.34109  | 0.28314  | 0.50806  | 0.58174  | 0.4875   | 0.49607  | 0.5209   | 0.66234  | 0.33683  | 0.26368  | 0.19152  | 0.21243  | -0.55532 | -0.05292 | -0.22951 | -0.09163 | -0.03058 | -0.12548 |
| PF14_0400   | -0.26077 | -0.47944 | -0.2285  | -0.1696  | -0.32081 | -0.33617 | -0.4502  | -0.14134 | 0.5392   | 0.65359  | 0.63033  | 0.72031  | 0.75118  | 0.62804  | 0.38618  | 0.08826  | 0.11429  | -0.17354 | -0.22182 | -0.11798 | 0.06848  | 0.02931  | 0.2017   | 0.19494  |
| PF10_0362   | -0.39325 | -0.59927 | -0.61738 | -0.60114 | -0.60769 | -0.79708 | -0.8505  | -0.7078  | -0.24664 | 0.25558  | 0.31892  | 0.41435  | 0.60305  | 0.81851  | 0.64579  | 0.49039  | 0.51211  | 0.44734  | -0.10592 | 0.13944  | -0.13122 | -0.42553 | -0.44313 | -0.54456 |
| PF10_0105   | -0.44075 | -0.38924 | -0.04766 | -0.11011 | -0.10377 | 0.37947  | 0.40451  | 0.28322  | 0.59917  | 0.53567  | 0.71403  | 0.84461  | 0.79231  | 0.53443  | 0.59832  | 0.3914   | 0.36807  | 0.05583  | 0.37569  | -0.18073 | -0.2963  | -0.26327 | -0.01647 | -0.09759 |
| PF11_0208   | -1.75538 | -0.86327 | -0.3465  | 0.03023  | 0.14198  | 0.44415  | 0.24296  | -0.08748 | -0.31795 | -0.1291  | 0.25843  | 0.51681  | 0.47006  | 0.40395  | 0.26401  | 0.07542  | -0.23387 | -0.60945 | -1.10824 | -1.717   | -2.1288  | -1.97087 | -1.93422 | -1.69282 |
| PF10_0073   | -0.40403 | -0.51065 | 0.06157  | -0.51391 | -0.80392 | -0.62913 | -0.60016 | -0.81229 | -0.74092 | -0.90314 | -0.7621  | -0.71222 | -0.5822  | -0.86717 | -0.17337 | 0.06215  | 0.65458  | 0.13727  | 0.72122  | 0.20074  | 0.23418  | -0.00895 | 0.17546  | -0.07636 |
| PF13_0137   | 0.41036  | 0.10250  | 1.39976  | 1.37727  | 1.36826  | 1.57509  | 1.44591  | 1.25078  | 1.27553  | 1.16744  | 0.97386  | 0.8164   | 0.54785  | 0.27604  | -0.01569 | -0.59798 | -0.45725 | -0.62165 | -0.66831 | -0.42137 | -0.07744 | 0.05423  | 0.35661  |          |
| MAL13P1.192 | 0.36693  | -0.34291 | 0.00672  | -0.21224 | -0.39335 | -0.55727 | -0.69168 | -0.70396 | 0.88777  | 0.72944  | 0.83465  | 0.99131  | 0.9668   | 0.86766  | 0.57336  | 0.30948  | 0.03199  | 0.15866  | -0.00602 | -0.1306  | -0.20407 | -0.36276 | -0.1772  | -0.12923 |
| PFD0480w    | -0.05757 | 0.05095  | -0.38532 | -0.39868 | -0.24112 | 0.19253  | 0.26426  | 0.27934  | 0.32486  | 0.16117  | 0.23374  | 0.06883  | -0.06816 | -0.33651 | -0.14903 | 0.18452  | 0.04778  | 0.18821  | 0.75414  | 0.29462  | 0.28835  | 0.24832  | 0.14447  | -0.05254 |
| PFL1980c    | -0.37859 | -0.38437 | -0.41712 | 0.09812  | 0.22852  | 0.24094  | 0.44412  | 0.3917   | 0.50757  | 0.70702  | 0.56329  | 0.50184  | 0.54931  | 0.63148  | 0.44637  | 0.24748  | 0.21713  | -0.0564  | -0.38236 | -0.27012 | -0.50348 | -0.55401 | -0.54474 | -0.40349 |
| PF11_0160   | -0.05112 | 0.09968  | 0.23716  | 0.3855   | 0.47363  | 0.65002  | 0.53586  | 0.15939  | -0.3225  | -0.89072 | -1.12057 | -1.26497 | -0.98332 | -0.7334  | -0.02263 | 0.40328  | 0.62143  | 0.39751  | 0.61968  | 0.30015  | 0.34615  | 0.20369  | 0.07313  | 0.01931  |
| PFB0280w    | -0.20651 | 0.04489  | 0.2851   | 0.17382  | 0.50016  | 0.65395  | 0.84886  | 0.67873  | 0.90365  | 0.99731  | 0.61519  | 0.52623  | 0.48483  | 0.50057  | -0.1022  | -0.3943  | -0.29701 | -0.30559 | -0.10531 | -0.53487 | -0.29065 | -0.03621 | 0.00845  | 0.37877  |
| PF14_0443   | -1.07394 | -1.26866 | -1.50399 | -1.92072 | -1.86843 | -2.40371 | -2.51611 | -2.48381 | -2.69786 | -2.10337 | -1.3544  | -1.20815 | -0.80042 | -0.58836 | -0.11059 | 0.57579  | 0.64043  | 0.66064  | 0.83     | 0.42803  | 0.43923  | -0.398   | -0.36642 | -0.53459 |
| PF11_0482   | -1.18361 | -1.35696 | -1.75325 | -0.99202 | -1.13989 | -1.13202 | -1.03272 | -0.75118 | -0.36928 | -0.11862 | 0.22406  | 0.36083  | 0.65357  | 0.74393  | 0.82697  | 0.53254  | 0.3556   | 0.14176  | -0.23264 | -0.41307 | -0.53946 | -0.64971 | -0.72696 | -0.85188 |
| MAL8P1.4    | 1.87291  | 2.28928  | 2.09443  | 1.90304  | 1.86323  | 1.38568  | 0.95708  | 0.44501  | -0.02087 | -0.5874  | -1.04591 | -1.73826 | -2.20308 | -2.30868 | -2.51707 | -2.66523 | -2.4348  | -2.38628 | -1.99324 | -0.90946 | 0.2955   | 0.7859   | 0.89249  | 1.20722  |
| PF13_0064   | 0.66535  | 0.64059  | 0.56886  | 0.69415  | 0.58741  | 0.51757  | 0.56335  | 0.35844  | 0.17151  | 0.02484  | -0.27256 | -0.49521 | -0.50639 | -0.63234 | -0.3492  | -0.21087 | 0.24509  | -0.07571 | 0.86201  | 0.62009  | 0.73878  | 0.60522  | 0.75232  | 0.75614  |
| PFB0365w    | -0.71504 | -0.98076 | -1.2051  | -1.45356 | -1.4292  | -1.39061 | -1.46785 | -1.50776 | -1.37595 | -0.8668  | -0.49231 | -0.2341  | 0.39725  | 0.88376  | 0.89614  | 0.80969  | 0.85442  | 0.60346  | -0.04996 | 0.06954  | -0.33051 | -0.5205  | -0.87617 | -1.1211  |
| PF14_0088   | -0.36903 | -0.26478 | -0.34344 | -0.20375 | -0.29006 | -0.49457 | -0.0942  | -0.25726 | -0.22709 | -0.2428  | -0.35268 | -0.02326 | 0.19744  | 0.6956   | 0.11341  | 0.5313   | 0.78647  | 0.53267  | -0.0528  | 0.29688  | -0.01438 | -0.216   | -0.26467 | -0.4159  |
| PF13_0308   | -0.32076 | -0.62816 | -0.82237 | -0.4803  | -0.6105  | -0.24523 | -0.36964 | -0.41266 | -0.49144 | -0.26139 | -0.07147 | -0.04464 | 0.23702  | 0.31742  | 0.59046  | 0.62309  | 0.5884   | 0.39576  | 0.72622  | 0.21341  | 0.11717  | -0.08367 | -0.1085  | -0.36701 |
| PF0535c     | 0.33159  | 0.63888  | 0.43138  | 0.53172  | 0.56174  | 0.38737  | 0.40416  | 0.56073  | 0.38618  | 0.40457  | 0.27171  | 0.17725  | 0.14554  | -0.01847 | -0.08078 | -0.36356 | -0.52131 | -0.54023 | -0.7707  | -0.50805 | -0.234   |          |          |          |

|             |          |          |          |          |          |          |          |          |          |          |          |          |          |          |          |          |          |          |          |          |          |          |          |          |
|-------------|----------|----------|----------|----------|----------|----------|----------|----------|----------|----------|----------|----------|----------|----------|----------|----------|----------|----------|----------|----------|----------|----------|----------|----------|
| PFIO360c    | 0.05473  | -0.03658 | -0.21541 | -0.40402 | -0.3262  | -0.62105 | -1.01568 | -1.14131 | -1.51959 | -1.81506 | -1.82709 | -2.03388 | -1.87817 | -1.61367 | -1.59076 | -0.57836 | 0.64778  | 0.61312  | 1.30056  | 1.08703  | 1.09662  | 1.0457   | 0.99232  | 0.86357  |
| PFIO200c    | -0.50693 | -0.15917 | 0.17759  | 0.27081  | 0.21535  | 0.24474  | 0.2646   | 0.05099  | -0.03131 | 0.16605  | 0.24443  | 0.37154  | 0.61806  | 0.72549  | 0.58579  | 0.47925  | 0.56774  | 0.16643  | -0.20514 | -0.22931 | -0.50939 | -0.43867 | -0.56813 | -0.51225 |
| MAL13P1.329 | -0.51583 | -0.02776 | -0.35199 | -0.08833 | -0.15041 | -0.16062 | -0.22666 | -0.35484 | -0.52883 | -0.63266 | -0.53717 | -0.55398 | -0.63288 | -0.53396 | -0.47873 | -0.16985 | 0.00412  | 0.21687  | -0.68928 | 0.73998  | 0.55172  | 0.48024  | 0.69868  | 0.61782  |
| PF07_0075   | -0.30005 | -0.56603 | -0.29025 | -0.20855 | -0.45743 | -0.24986 | 0.03759  | 0.63088  | 0.81156  | 0.86089  | 0.93848  | 0.93281  | 0.68615  | 0.58468  | 0.47074  | 0.27594  | 0.12835  | 0.14763  | -0.02994 | -0.29776 | -0.39984 | -0.2397  | -0.25985 | -0.28379 |
| PFA0510w    | -0.25492 | -0.4448  | -0.35344 | -0.45571 | -0.35334 | -0.21382 | 0.05485  | 0.11174  | 0.67772  | 0.8445   | 0.78933  | 0.80909  | 0.97747  | 0.88659  | 0.4317   | 0.07253  | 0.02931  | -0.13134 | -0.51197 | -0.29824 | -0.16672 | -0.07678 | -0.12881 | -0.07032 |
| PF10_0267   | 0.15142  | 0.29061  | 0.45381  | 0.85497  | 0.82864  | 1.13935  | 1.09176  | 1.29369  | 1.32888  | 1.05694  | 1.11804  | 1.02086  | 0.6817   | 0.4076   | 0.23613  | 0.08296  | -0.33221 | -0.36416 | -0.45123 | -0.47456 | -0.49025 | -0.40122 | -0.30419 | -0.09934 |
| PFB0560w    | -0.18964 | -0.04391 | -0.14383 | -0.05622 | -0.07351 | -0.13839 | -0.03987 | -0.08614 | 0.21604  | 0.29213  | 0.21448  | 0.31826  | 0.46216  | 0.53348  | 0.35407  | 0.14389  | 0.0779   | -0.15452 | -0.66096 | -0.33144 | -0.38888 | -0.31832 | -0.34456 | -0.23812 |
| PFA0150c    | -0.15326 | -0.52474 | -0.29012 | -0.69886 | -0.57508 | -0.60815 | -0.76259 | -0.74405 | -0.26944 | 0.31111  | 0.58252  | 0.5571   | 0.54888  | 0.4358   | 0.66127  | 0.7565   | 0.66374  | 0.70168  | 0.83666  | 0.51319  | 0.275    | -0.24187 | -0.31753 | -0.42524 |
| PF13_0247   | 0.93937  | 1.24458  | 1.18905  | 1.76597  | 1.70731  | 1.71817  | 1.47417  | 1.26993  | 0.83264  | 0.56786  | 0.56613  | 0.15468  | 0.15658  | -0.03362 | -0.1945  | -0.25837 | -0.48163 | -0.32499 | 0.22021  | 0.36414  | 0.71818  | 0.68845  | 1.08705  | 1.20561  |
| MAL7P1.12   | -0.30829 | -0.4945  | -0.14263 | 0.04448  | 0.09428  | 0.44465  | 0.56555  | 0.37686  | 0.65629  | 0.66498  | 0.5071   | 0.50547  | 0.41109  | 0.3122   | 0.10506  | -0.16487 | -0.12326 | -0.51694 | -0.93678 | -0.91868 | -0.85578 | -0.61274 | -0.60602 | -0.5314  |
| PF10_0027   | -0.23015 | -0.08195 | 0.33467  | 0.49739  | 0.50266  | 0.85915  | 1.04465  | 1.04903  | 1.66296  | 1.56482  | 1.43737  | 1.33145  | 1.11821  | 0.65832  | 0.36265  | 0.03782  | -0.41323 | -0.36932 | -0.54769 | -0.5489  | -0.57988 | -0.52875 | -0.35437 | -0.25869 |
| PF1340w     | 0.23505  | -0.00595 | -1.51312 | -0.32971 | -0.66887 | -0.76945 | -0.67747 | -0.57462 | -0.87825 | -0.80693 | -0.73596 | -0.58236 | -0.28574 | -0.0936  | 0.46341  | 0.76756  | 0.90511  | 0.896    | 1.1654   | 0.63158  | 0.54128  | 0.40601  | 0.21587  | -0.09945 |
| PF1775w     | 2.32387  | 2.59015  | 2.18011  | 2.56768  | 2.42849  | 2.15987  | 1.87015  | 1.6587   | 0.60934  | 0.06893  | -0.18994 | -0.53636 | -0.91298 | -1.02295 | -1.15558 | -1.43193 | -1.07524 | -1.62924 | -0.60126 | 0.18134  | 0.87165  | 1.15304  | 1.60567  | 1.80178  |
| MAL8P1.50   | -0.49448 | -0.41011 | -0.46417 | -0.44773 | -0.25227 | -0.21521 | -0.09933 | 0.07837  | 0.34302  | 0.52683  | 0.77713  | 0.79101  | 0.87266  | 0.6052   | 0.67042  | 0.39744  | -0.04646 | 0.18678  | 0.18877  | -0.35446 | -0.25895 | -0.50085 | -0.36076 | -0.25442 |
| PF13_0027   | -0.10191 | -0.09413 | 0.40234  | 0.64244  | 0.12624  | 0.69431  | 0.66668  | 0.66589  | 1.09521  | 1.20412  | 1.15455  | 0.99011  | 0.8021   | 0.69074  | 0.56716  | 0.27919  | -0.07449 | -0.00151 | -0.2063  | -0.17619 | -0.30123 | -0.20899 | -0.09323 | -0.06266 |
| PF14_0055   | 0.91169  | 0.97065  | 1.11969  | 1.29083  | 0.94941  | 1.17404  | 1.07085  | 1.1317   | 1.09105  | 0.77122  | 0.46101  | 0.43494  | 0.00662  | -0.34734 | -0.73829 | -0.96096 | -1.15115 | -1.20015 | -1.09647 | -0.68995 | -0.10068 | 0.35782  | 0.58273  | 0.76481  |
| MAL8P1.56   | -0.07928 | -0.96762 | -0.68911 | -0.80594 | -0.81875 | -0.89431 | -0.94283 | -1.00944 | -0.8844  | -0.90071 | -0.8724  | -0.6293  | -0.43608 | 0.15845  | 0.4906   | 0.74098  | 0.75237  | 0.7849   | 0.93958  | 0.76453  | 0.34807  | -0.22757 | -0.34165 | -0.51699 |
| PF0235c     | 0.62084  | 0.67224  | 0.07193  | 0.06037  | -0.23242 | -0.57239 | -0.99223 | -1.14508 | -1.81035 | -1.82724 | -1.82857 | -1.88625 | -1.80145 | -1.56404 | -0.12634 | -0.56363 | 0.29238  | 0.46166  | 1.63611  | 1.27883  | 1.37315  | 1.20943  | 1.19928  | 0.7275   |
| PFL2330w    | -0.17147 | -0.29891 | -0.33575 | -0.04454 | -0.07493 | -0.34779 | -0.47887 | -0.25962 | -0.55649 | -0.39628 | -0.09435 | 0.27188  | 0.54339  | 0.79776  | 0.71747  | 0.75761  | 0.42153  | 0.46386  | 0.33093  | 0.20796  | 0.03944  | -0.10548 | -0.26739 | -0.18193 |
| PFL2235w    | 0.03299  | 0.49403  | 0.6802   | 0.8048   | 0.90232  | 1.00629  | 0.81357  | 0.7754   | 0.42842  | 0.43916  | 0.32785  | 0.32024  | 0.43729  | -0.0644  | 0.27993  | 0.12044  | 0.09169  | -0.12909 | -0.10706 | -0.43275 | -0.38595 | 0.03945  | 0.05969  | 0.29764  |
| PF14_0183b  | 0.92839  | 1.11586  | 1.19777  | 1.16342  | 0.92914  | 0.82983  | 0.67053  | 0.80432  | 0.65758  | 0.57032  | 0.55443  | 0.29267  | 0.13276  | -0.25184 | -0.35521 | -0.81925 | -1.04638 | -1.0781  | -0.81197 | -0.27556 | 0.13406  | 0.29618  | 0.67341  | 1.01231  |
| PF14_0409   | -0.58893 | -0.39517 | -0.026   | -0.08684 | -0.27282 | -0.1793  | -0.17765 | -0.15979 | -0.09577 | -0.1866  | -0.20797 | -0.16823 | -0.16609 | -0.07325 | 0.2906   | 0.40417  | 0.57829  | 0.46206  | 0.5276   | 0.34186  | 0.33584  | 0.04568  | -0.12042 | -0.51305 |
| PF11_0417   | 0.24988  | 0.26788  | -0.20913 | -0.02407 | -0.34129 | -0.42187 | -0.56312 | -1.20782 | -1.02307 | -0.86999 | -0.89557 | -1.11053 | -0.92165 | -0.89657 | -0.34507 | 0.29006  | 1.25231  | 0.67866  | 0.88743  | 1.1777   | 1.13106  | 0.9037   | 0.69461  | 0.27297  |
| PF07_0037   | 0.33414  | 0.41501  | 0.68641  | 0.86904  | 0.88886  | 0.94124  | 0.86524  | 0.76935  | 0.75056  | 0.72051  | 0.66036  | 0.61921  | 0.57972  | 0.46843  | 0.30291  | 0.10023  | -0.03847 | -0.14048 | -0.31045 | -0.39585 | -0.39324 | -0.12617 | -0.22875 | -0.03404 |
| PF0810c     | 0.76411  | 0.59357  | 0.27758  | 1.03054  | 0.99241  | 0.98068  | 0.82757  | 0.52213  | 0.48299  | 0.31649  | 0.13002  | 0.12589  | 0.1035   | 0.39944  | 0.27686  | 0.30104  | 0.13113  | 0.36004  | 0.1927   | 0.32     | 0.17283  | 0.34697  | 0.36273  | 0.29576  |
| PF13_0341   | 0.6988   | 1.04869  | 1.15666  | 1.18243  | 1.26592  | 1.29463  | 1.17777  | 1.28464  | 1.18514  | 0.96918  | 0.84708  | 0.59438  | 0.36682  | -0.25253 | -0.27303 | -0.5059  | -0.93624 | -1.08513 | -0.8427  | -0.97174 | -0.49949 | 0.09663  | 0.16383  | 0.58709  |
| PFIO925w    | 0.25078  | 0.13313  | 0.13243  | 0.42267  | 0.40842  | 0.17894  | 0.45477  | 0.74648  | 0.70103  | 0.62023  | 0.93182  | 0.84077  | 0.47394  | 0.26906  | -0.26927 | -0.55883 | -0.31298 | -0.67071 | -0.49463 | -0.62859 | -0.47322 | -0.16165 | -0.02551 | -0.14995 |
| PF14_0113   | 0.88496  | 1.12567  | 1.08204  | 1.27918  | 1.34879  | 1.13879  | 1.0976   | 1.26094  | 1.09587  | 0.97905  | 0.79126  | 0.62322  | 0.27977  | 0.029    | -0.37994 | -0.65071 | -0.95148 | -0.87567 | -1.31863 | -0.8317  | -0.4061  | 0.00179  | 0.26045  | 0.67926  |
| PF14_0124   | 0.00305  | 0.3153   | 0.54685  | 0.52697  | 1.02365  | 1.7417   | 1.49641  | 1.87015  | 1.65545  | 1.05319  | 1.21119  | 0.68952  | 1.16331  | -0.65328 | -0.93446 | -0.72594 | -1.59206 | -1.35059 | -1.3176  | -0.33765 | -0.98112 | -0.69717 | -0.37316 | 0.1753   |
| PFE0800w    | -0.30168 | -0.39903 | -0.43528 | -0.43393 | -0.06944 | 0.17112  | 0.66036  | 0.91012  | 1.18448  | 1.19632  | 1.13083  | 0.90216  | 0.73652  | 0.37033  | 0.06965  | -0.21668 | -0.16252 | -0.06444 | -0.15564 | 0.01653  | 0.26638  | -0.05224 | -0.11212 | -0.09806 |
| PF10_0292   | -0.9172  | -1.40315 | -1.16504 | -1.94409 | -2.32823 | -2.59392 | -2.82099 | -3.16325 | -3.56033 | -3.48922 | -3.56639 | -3.33857 | -2.53045 | -1.18549 | 0.2937   | 1.00566  | 1.39635  | 1.37996  | 0.3839   | 0.72164  | 0.32909  | -0.16723 | -0.54974 | -1.02128 |
| PFIO565w    | -0.69601 | -0.69126 | -0.7812  | -0.99166 | -0.96212 | -0.95541 | -1.05327 | -1.14795 | -1.30483 | -0.81273 | -0.65407 | -0.31337 | -0.01758 | 0.27959  | 0.65745  | 0.55828  | 0.65541  | 0.63649  | 0.13402  | 0.15431  | -0.11984 | -0.22444 | -0.5676  | -0.50698 |
| MAL13P1.161 | -0.84426 | -0.93655 | -0.5612  | -1.09172 | -1.10133 | -1.04064 | -1.05708 | -1.00615 | -0.82462 | -0.93657 | -0.25587 | -0.10398 | 0.41609  | 0.33173  | 0.76151  | 0.77276  | 0.47211  | 0.45242  | 0.33727  | -0.05416 | -0.30748 | -0.65125 | -0.75042 | -0.97471 |
| PF0400w     | -0.86662 | -0.24312 | 0.01017  | 0.31153  | 0.59294  | 0.59627  | 0.5005   | 0.53862  | 0.83953  | 0.90778  | 0.69857  | 0.98387  | 0.59661  | 0.25861  | 0.28155  | -0.19269 | -0.25319 | -0.60735 | -0.803   | -1.26121 | -1.32645 | -0.89429 | -0.81245 | -0.64354 |
| PF14_0673   | -0.96432 | -0.33855 | -0.35247 | 0.21215  | 0.35144  | 0.60954  | 0.63501  | 0.84173  | 1.07087  | 1.2969   | 1.32432  | 1.13611  | 0.91861  | 0.50356  | 0.3112   | -0.06063 | -0.22514 | -0.54562 | -0.68539 | -0.8424  | -0.7083  | -0.64268 | -0.51885 | -0.32125 |
| PF13_0114   | 0.75637  | 0.70553  | 0.32675  | 0.71826  | 1.00574  | 0.94313  | 0.76546  | 0.44196  | 0.12501  | -0.03503 | -0.20239 | -0.42978 | -0.38867 | -0.25871 | -0.02283 | 0.15535  | 0.6228   | 0.63931  | 0.28952  | 0.83141  | 1.0492   | 0.98697  | 1.14132  | 1.16869  |
| PF11_0161   | -0.16418 | 0.12708  | 0.69666  | 1.13097  | 1.30327  | 1.40299  | 1.39431  | 1.44003  | 1.49677  | 1.34274  | 1.0381   | 1.03862  | 0.30957  | -0.1396  | -0.96159 | -1.27023 | -1.38386 | -1.80178 | -2.06588 | -2.02449 | -1.75218 | -1.32736 | -0.95322 | -0.52091 |
| PF11_0459   | -0.71529 | -0.80581 | -0.87503 | -0.90162 | -0.76759 | -0.96747 | -0.95322 | -0.85005 | -0.85347 | -0.50532 | 0.16492  | 0.33794  | 0.68064  | 0.60955  | 0.7931   | 0.6765   | 0.60317  | 0.21149  | -0.01465 | -0.20612 | -0.46388 | -0.50067 | -0.56655 | -0.51107 |
| PF13_0018   | 0.5123   | 0.57279  | 0.59222  | 0.59913  | 0.44216  | 0.41172  | 0.3878   | 0.52821  | 0.5912   | 0.54446  | 0.39361  | 0.32157  | 0.19069  | -0.14924 | -0.37213 | -0.47857 | -0.52605 | -0.20001 | -0.11575 | 0.07519  | 0.25641  | 0.50127  | 0.54805  |          |
| MAL13P1.142 | -0.47015 | -0.31781 | 0.00509  | -0.03906 | 0.01602  | 0.22863  | 0.23344  | 0.45503  | 0.10883  | 0.3599   | 0.5785   | 0.68011  | 0.60448  | 0.45808  | 0.43236  | 0.34281  | -0.00383 | -0.12073 | -0.06796 | -0.32168 | -0.42266 | -0.42875 | -0.49818 | -0.45937 |
| PFD1175w    | -0.17285 | 0.57958  | 1.34773  | 1.46623  | 2.07407  | 2.02946  | 2.23094  | 2.7198   | 1.95025  | 1.52479  | 0.57869  | -0.22083 | -0.97291 | -1.06338 | -1.47784 | -1.47806 | -1.42461 | -1.83644 | -1.64849 |          |          |          |          |          |

|             |          |          |          |          |          |          |          |          |          |          |          |          |          |          |          |          |          |          |          |          |          |          |          |          |
|-------------|----------|----------|----------|----------|----------|----------|----------|----------|----------|----------|----------|----------|----------|----------|----------|----------|----------|----------|----------|----------|----------|----------|----------|----------|
| PF11 0183   | -0.78502 | -0.45715 | -0.18347 | -0.71755 | -0.5067  | -0.59614 | -0.7562  | -0.42855 | -0.70991 | -0.35381 | -0.24014 | -0.22431 | 0.15765  | 0.19795  | 0.23563  | 0.16199  | 0.24408  | 0.29253  | -0.32848 | -0.63617 | -1.0065  | -1.36599 | -1.65204 | -1.40498 |
| PF14 0034   | 0.07723  | 0.50828  | 0.34585  | 0.38391  | 0.5402   | 0.50968  | 0.51129  | 0.38947  | 0.15326  | 0.26115  | 0.48473  | 0.42404  | 0.47788  | 0.36677  | 0.40082  | 0.2231   | 0.14115  | 0.44286  | 0.29764  | 0.43936  | 0.69467  | 0.91368  | 0.76379  |          |
| PFD0150w    | 0.14188  | 0.9594   | 0.81609  | 0.80786  | 0.7545   | 0.60182  | 0.66714  | 0.60232  | 0.65353  | 0.58407  | 0.20381  | 0.33477  | 0.38391  | 0.44127  | 0.21992  | -0.19116 | -0.36698 | -0.33842 | -1.13639 | -0.52335 | -0.41522 | -0.19289 | -0.1344  | 0.04691  |
| PF14 0324   | -0.23195 | -0.32429 | -0.0769  | -0.31053 | -0.11762 | -0.05249 | 0.279    | 0.69234  | 1.0559   | 1.03421  | 1.07406  | 1.25212  | 0.96569  | 0.56526  | 0.16966  | -0.49942 | -1.01115 | -0.87767 | -1.58644 | -1.43785 | -1.21051 | -1.14558 | -0.94011 | -0.72225 |
| MAL7P1.95   | 1.13768  | 0.73278  | 0.11413  | 0.21548  | -0.28177 | -0.55803 | -0.67982 | -0.6847  | -0.29665 | -0.16871 | -0.06191 | 0.11365  | 0.15509  | 0.06245  | -0.12706 | -0.29093 | 0.13389  | 0.37616  | 0.64832  | 0.99236  | 1.00289  | 1.12125  | 1.12389  | 0.87279  |
| MAL13P1.413 | -0.43496 | 0.96551  | 1.75298  | 2.73501  | 3.01306  | 3.39728  | 2.85613  | 1.74061  | 1.09103  | -0.42523 | -1.17609 | -2.46237 | -3.1537  | -4.10547 | -4.20732 | -4.65592 | -4.84468 | -5.13884 | -4.7905  | -4.68107 | -3.54835 | -1.98272 | -1.28873 | 0.12417  |
| PFE1420w    | 0.24272  | 0.34     | 0.46233  | 0.57315  | 0.74026  | 0.60159  | 0.50016  | 0.3178   | 0.13783  | 0.11082  | 0.26429  | 0.40965  | 0.40981  | 0.35013  | 0.47543  | 0.06962  | 0.29451  | 0.42433  | 0.65513  | 0.32242  | 0.40256  | 0.20611  | 0.33009  | 0.58388  |
| PF11235w    | 0.73747  | 1.07166  | 0.98174  | 1.00685  | 1.05322  | 0.94439  | 1.01966  | 0.96341  | 0.7165   | 0.61669  | 0.41625  | 0.18163  | -0.01869 | -0.3458  | -0.56458 | -0.99986 | -0.93125 | -0.90587 | -1.48031 | -1.14836 | -0.74032 | -0.16649 | 0.02203  | 0.39281  |
| PF13 0347   | 0.92381  | 1.32011  | 0.66379  | 1.62862  | 1.75665  | 1.2753   | 1.08536  | 1.56737  | 1.3588   | 0.98062  | 1.02611  | 0.79358  | -0.09922 | -0.54929 | -0.62762 | -0.63285 | -0.81446 | 0.01467  | 0.60085  | 0.46639  | 0.41371  | 0.4192   | 0.76168  | 0.82793  |
| PF10 0184   | -0.09776 | -0.26941 | -0.33877 | -1.01739 | -1.22113 | -1.32165 | -1.37734 | -1.61379 | -1.75394 | -1.86512 | -1.73588 | -1.84393 | -1.68097 | -1.06794 | -0.09738 | 0.66367  | 1.27337  | 0.97434  | 0.56654  | 1.18248  | 1.14227  | 0.71866  | 0.37587  | -0.27881 |
| PFF0425w    | -0.68656 | -0.17001 | -0.24285 | -0.08954 | 0.06408  | -0.1703  | -0.32375 | -0.08152 | -0.32476 | -0.49044 | -0.0013  | 0.03736  | 0.38957  | 0.2165   | 0.35789  | 0.20097  | 0.21312  | 0.05574  | 0.0802   | -0.06245 | -0.02897 | -0.1484  | 0.09726  | 0.1981   |
| PFF0485c    | 0.34413  | -0.34871 | 0.02303  | -0.79006 | -1.25312 | -0.94999 | -1.38571 | -1.66018 | -1.88263 | -2.25418 | -1.67132 | -1.93461 | -1.87119 | -1.47249 | -0.34298 | 0.69115  | 0.98687  | 0.8123   | 1.43264  | 1.07095  | 0.87565  | 0.77959  | 0.48267  | -0.11578 |
| PF10 0170   | 1.03622  | 0.19125  | -0.31281 | 0.07493  | -0.25967 | -0.64508 | -1.29892 | -1.41837 | -2.39217 | -2.98115 | -2.75073 | -3.21224 | -3.60087 | -3.82827 | -3.63725 | -3.55272 | -1.85359 | -1.99696 | 1.32079  | 1.21111  | 1.3213   | 1.01496  | 1.76024  | 1.80997  |
| PF11 0384   | 0.3712   | 0.36761  | 0.68703  | 0.61059  | 0.64598  | 0.64524  | 0.51365  | 0.38312  | 0.48256  | 0.56894  | 0.51607  | 0.43933  | 0.457    | 0.27822  | -0.13723 | -0.31217 | -0.55356 | -0.5766  | -0.43971 | -0.47605 | -0.2629  | -0.06932 | 0.18304  | 0.37347  |
| PFF1210w    | 1.23256  | 0.22859  | -0.67897 | 0.08957  | 0.14951  | -0.30757 | -0.5143  | -0.63897 | -1.00898 | -0.9579  | -0.87008 | -0.6382  | -0.60239 | -0.52632 | -0.36412 | -0.1503  | 0.02046  | 0.09905  | 1.57691  | 1.32252  | 1.18509  | 1.01506  | 1.36336  | 1.63307  |
| PF10015c    | 0.09443  | -0.06414 | 0.1929   | -0.16055 | -0.22561 | -0.04835 | -0.33841 | -0.38332 | -0.27726 | 0.01188  | -0.23045 | -0.16427 | -0.15518 | 0.15458  | 0.25433  | 0.36242  | 0.47845  | 0.60798  | 0.0692   | 0.35635  | 0.29052  | 0.01612  | -0.1556  | -0.31719 |
| PF14 0212   | -0.13181 | -0.48556 | -0.49114 | -0.84295 | -0.80381 | -1.12123 | -1.21508 | -0.95229 | -0.8775  | -0.72299 | -0.4201  | -0.30806 | 0.02206  | -0.20054 | 0.00667  | 0.25064  | 0.29794  | 0.69225  | 0.73674  | 0.65289  | 0.68927  | 0.25525  | 0.19131  | -0.21563 |
| PFB0855c    | -0.79892 | -0.80161 | -1.21974 | -0.44403 | -0.75462 | -0.802   | -0.23688 | 0.2152   | 0.32356  | 0.55677  | 0.6405   | 0.63406  | 0.71542  | 0.35715  | 0.54257  | 0.3515   | 0.40539  | -0.02954 | 0.20699  | -0.30237 | -0.39478 | -0.3728  | -0.33292 | -0.42446 |
| PFC0320w    | -0.51142 | -0.69662 | -0.85775 | -0.85233 | -0.97296 | -1.10254 | -1.0941  | -1.00979 | -0.72058 | -0.25645 | 0.03895  | 0.43545  | 0.53135  | 0.75848  | 0.69984  | 0.61709  | 0.49964  | 0.70214  | 0.1368   | 0.31575  | 0.09293  | -0.21337 | -0.32141 | -0.56442 |
| PFD0345c    | 1.668    | 1.52359  | 1.34339  | 1.72938  | 1.64235  | 1.73288  | 1.62238  | 1.54216  | 1.25604  | 0.94703  | 0.64984  | 0.52671  | 0.08689  | -0.11261 | -0.29495 | -0.45777 | -0.63498 | -0.45018 | -0.57025 | -0.58301 | -0.26432 | 0.47366  | 0.52837  | 0.95483  |
| PFF0775w    | -0.80758 | -0.74975 | -0.23802 | -0.79811 | -1.12422 | -1.01283 | -0.95724 | -0.38301 | 0.11981  | 0.41549  | 0.61557  | 0.76009  | 0.72151  | 0.54607  | 0.64565  | 0.59188  | 0.44069  | 0.39242  | 0.31668  | -0.02005 | -0.48417 | -0.45838 | -0.59756 | -0.73097 |
| PF14 0266   | -0.7952  | -1.0655  | -0.62798 | -0.47826 | 0.04256  | 0.95253  | 1.06685  | 1.00457  | 0.96381  | 0.77928  | 0.7479   | 0.72597  | 0.49357  | 0.47368  | 0.45281  | 0.31524  | 0.15094  | 0.08923  | -0.13978 | -0.06835 | -0.55432 | -0.90331 | -0.83673 | -0.86765 |
| PFL0765w    | -0.24977 | 0.02714  | -0.0102  | 0.43402  | 0.47224  | 0.52992  | 0.49927  | 0.18439  | -0.06802 | -0.20529 | -0.22786 | -0.18025 | -0.00422 | 0.17683  | 0.51536  | 0.64123  | 0.41463  | 0.41365  | 0.25087  | 0.031    | -0.2555  | -0.27076 | -0.45258 | -0.50485 |
| PFL1610c    | 0.34703  | 0.69965  | 0.98153  | 0.9492   | 0.8941   | 0.76791  | 0.7973   | 0.89334  | 0.61066  | 0.69609  | 0.65252  | 0.4784   | 0.47119  | 0.30195  | 0.09294  | -0.16337 | -0.29137 | -0.36224 | -0.50083 | -0.43775 | -0.35312 | -0.04397 | 0.14805  | 0.28136  |
| PFB0350c    | -0.40273 | -0.58618 | -1.26963 | -0.96033 | -1.16283 | -1.22904 | -1.52548 | -1.68087 | -1.68589 | -1.70475 | -2.08921 | -1.85589 | -1.39642 | -0.66527 | 0.11822  | 0.72241  | 0.10639  | 0.56897  | 0.80863  | 0.77241  | 0.50113  | 0.22739  | -0.10046 | -0.73307 |
| PF13 0250   | 0.66682  | 0.24351  | 0.64236  | 0.58255  | 0.7965   | 0.10288  | 0.15153  | 0.2485   | 0.31007  | 0.36249  | 0.45549  | 0.48305  | 0.45296  | 0.32016  | 0.31978  | 0.20866  | -0.15521 | 0.25962  | 0.2844   | -0.00655 | -0.05079 | -0.01639 | -0.12437 | -0.02481 |
| PFE1210c    | -0.42269 | 0.05003  | 0.13702  | 0.37939  | 0.52357  | 0.66209  | 0.55056  | 0.62622  | 0.74514  | 0.64556  | 0.58711  | 0.5925   | 0.43639  | 0.26578  | 0.33823  | 0.16211  | -0.12586 | 0.00656  | -0.05846 | -0.35208 | -0.44828 | -0.43661 | -0.39203 | -0.15372 |
| PFA0620c    | -3.28095 | -2.10022 | -1.28866 | -0.85223 | 0.20017  | 1.10924  | 2.39317  | 1.80669  | 2.23993  | 1.89041  | 0.6742   | 0.69886  | 0.20252  | -0.75412 | -1.79986 | -0.98713 | -2.87371 | -3.75189 | -4.34073 | -4.35073 | -3.73506 | -4.00957 | -3.31945 |          |
| PF08 0058   | 0.58018  | 1.06888  | -0.12501 | -0.3239  | -0.85474 | -1.04998 | -1.48837 | -1.86825 | -2.29911 | -2.80296 | -2.68955 | -2.78599 | -2.86847 | -2.52264 | -1.50895 | -0.31129 | 0.49186  | 0.66854  | 1.58266  | 1.0983   | 1.27987  | 1.07405  | 1.12878  | 0.6576   |
| PF13 0208   | 0.19478  | 0.48571  | 0.72073  | 0.74806  | 0.87991  | 0.9465   | 0.85536  | 0.98949  | 1.03832  | 1.05777  | 0.98665  | 0.88798  | 0.54024  | 0.31331  | 0.06897  | -0.22083 | -0.44078 | -0.51412 | -0.50214 | -0.71793 | -0.53796 | -0.38218 | -0.1147  | 0.02882  |
| PFC0350c    | -0.35891 | -0.44454 | -0.16433 | -0.00862 | -0.15078 | 0.16662  | 0.21084  | 0.54908  | 0.64769  | 0.70673  | 0.86882  | 0.85057  | 0.64495  | 0.10229  | -0.14146 | -0.40884 | -1.10769 | -0.94323 | -0.34134 | -0.66268 | -0.42207 | -0.50813 | -0.35446 | -0.25347 |
| PF14 0541   | 0.41551  | 0.32513  | 0.13009  | 0.7758   | 0.8259   | 0.8847   | 0.49349  | 0.29145  | 0.42732  | 0.24554  | 0.28018  | 0.14034  | -0.11715 | -0.48813 | -0.85991 | -1.04505 | -1.39641 | -1.42587 | -0.50444 | -0.36664 | -0.19439 | -0.09926 | 0.46349  | 0.74148  |
| PFD0740w    | 0.14112  | 0.38599  | 0.62028  | 0.64487  | 0.45837  | 0.55032  | 0.51064  | 0.55095  | 0.49107  | 0.79132  | 0.73839  | 0.67254  | 0.56102  | 0.2287   | -0.06108 | -0.337   | -0.2224  | -0.67114 | -0.88968 | -0.78999 | -0.624   | -0.29446 | -0.13564 | 0.00447  |
| MAL13P1.235 | -0.53516 | -0.69014 | -0.5486  | -0.63986 | -0.291   | -0.43906 | -0.21112 | 0.04455  | 0.27228  | 0.22444  | 0.27927  | 0.41415  | 0.36113  | 0.46516  | 0.65665  | 0.59858  | 0.57601  | 0.41539  | 0.50581  | 0.218    | 0.24345  | -0.36012 | -0.51576 | -0.57396 |
| MAL13P1.75  | -0.35473 | -0.25236 | -0.18721 | -0.18051 | -0.3758  | -0.00475 | 0.04866  | 0.311    | 0.57113  | 0.60159  | 0.6441   | 0.6554   | 0.96338  | 0.8419   | 0.62142  | 0.48413  | 0.1021   | 0.23062  | -0.24148 | -0.17862 | -0.04839 | -0.05684 | 0.09901  | 0.02845  |
| PFA0220w    | 1.24424  | 0.68624  | 0.33822  | 0.02104  | -0.19571 | -0.50622 | -0.68361 | -0.95757 | -0.89538 | -0.83666 | -1.23623 | -1.32089 | -1.38924 | -1.29991 | -1.74241 | -2.03381 | -1.68087 | -0.93283 | -0.33897 | 0.73298  | 0.83701  | 1.03173  | 1.00252  | 0.94255  |
| PF14 0421   | 0.0949   | -0.19935 | -0.64614 | -0.27859 | -0.33582 | -0.21527 | -0.44175 | -0.13884 | -0.2433  | -0.26805 | -0.15267 | -0.30202 | -0.11246 | -0.15135 | 0.24957  | 0.34457  | -0.13813 | 0.3415   | 1.24329  | 0.47775  | 0.55752  | 0.48737  | 0.45563  | 0.44335  |
| PFF0825c    | -0.4685  | -0.05325 | 0.06275  | 0.23155  | 0.51673  | 0.81229  | 0.98994  | 1.36924  | 1.34057  | 1.26731  | 1.42924  | 1.15329  | 0.93848  | 0.31257  | 0.04913  | -0.33982 | -0.71064 | -0.89707 | -1.0588  | -1.19586 | -1.22638 | -1.08124 | -0.97632 | -0.65065 |
| PF14 0031a  | -0.71209 | -0.86948 | -0.87012 | -0.96356 | -1.13718 | -1.22187 | -1.1555  | -1.20618 | -0.9047  | -0.49993 | -0.04508 | 0.19773  | 0.50469  | 0.60868  | 0.68919  | 0.60449  | 0.70174  | 0.41867  | 0.0495   | 0.14424  | 0.10876  | -0.14001 | -0.26248 | -0.62616 |
| MAL8P1.22   | -0.01675 | -0.4871  | -0.8928  | -1.26612 | -1.40632 | -1.3925  | -1.50991 | -1.63303 | -1.53264 | -0.8582  | -0.69364 | -0.56668 | -0.30876 | -0.06131 | 0.494    | 0.89402  | 0.75844  | 1.14927  | 1.3662   | 0.80665  | 0.57417  | 0.17617  | -0.16474 | -0.49895 |
| PF11 0115   | 0.57235  | 0.59354  | 0.85952  | 0.48936  | 0.39206  | 0.48159  | 0.41256  | 0.47225  | 0.38945  | 0.34107  | 0.30439  | 0.30489  | 0.3022   | 0.17369  | 0.22131  | 0.06663  | 0.06153  | -0.00627 | 0.14341  | 0.00425  | 0.08921  | 0.34     |          |          |

|                   |          |          |          |          |          |          |          |          |          |          |          |          |          |          |          |          |          |          |          |          |          |          |          |          |
|-------------------|----------|----------|----------|----------|----------|----------|----------|----------|----------|----------|----------|----------|----------|----------|----------|----------|----------|----------|----------|----------|----------|----------|----------|----------|
| MAL13P1.69        | 0.21566  | 0.46299  | 0.05093  | 0.48663  | 0.63973  | 0.69617  | 0.52942  | 0.66463  | 0.30078  | 0.48341  | 0.67096  | 0.61891  | 0.29479  | 0.55108  | 0.44553  | 0.50553  | 0.02016  | 0.14007  | 0.33562  | -0.01853 | -0.1239  | -0.08202 | -0.18829 | -0.25834 |
| PFL0860c          | 0.49209  | 0.67101  | 1.09203  | 0.78373  | 0.74901  | 0.70405  | 0.63978  | 0.52525  | 0.31845  | 0.48589  | 0.57133  | 0.51148  | 0.34682  | 0.22986  | 0.0532   | 0.06408  | -0.05496 | 0.01668  | 0.29309  | 0.202    | 0.1765   | 0.19286  | 0.30679  | 0.50516  |
| PFI1150w          | -0.832   | -0.75519 | -0.53579 | -0.40656 | -0.17385 | -0.03247 | -0.43579 | 0.65032  | 0.89928  | 0.89464  | 0.80815  | 0.85341  | 0.89863  | 0.78976  | 0.54339  | 0.19872  | -0.02595 | -0.04636 | -0.72611 | -0.65917 | -0.659   | -0.58112 | -0.50552 | -0.19475 |
| PF10_0125         | -0.52188 | -0.54234 | -0.47199 | -0.61069 | -0.43188 | -0.48756 | -0.47235 | -0.12877 | 0.58989  | 0.80697  | 0.93949  | 0.97819  | 0.80823  | 0.64869  | 0.47301  | 0.38014  | 0.07539  | 0.38143  | 0.24599  | 0.0774   | -0.1851  | -0.11512 | -0.06022 | -0.06065 |
| PF10 API0019      | 1.00215  | 1.68905  | 0.50384  | 0.52921  | -0.00703 | 0.34652  | -0.03132 | 0.47456  | 0.27763  | -0.82393 | -0.76877 | -0.89058 | -1.18547 | -1.14552 | -0.54747 | -0.13205 | 0.07811  | 0.47297  | 0.94342  | 0.27394  | 0.72901  | 1.26482  | 0.82693  | 0.42379  |
| PFF0435w          | -2.61683 | -2.4753  | -2.37358 | -2.72788 | -2.34263 | -2.09783 | -1.65843 | -0.38171 | 1.10273  | 0.92175  | 1.30008  | 1.10713  | 0.99004  | 1.00341  | 0.48376  | 0.22583  | -0.17708 | -0.10757 | -0.50267 | -1.34339 | -1.57354 | -1.69298 | -2.24398 | -1.82529 |
| PFL1325c          | 0.01243  | 0.2552   | 0.24741  | 0.48429  | 0.43971  | 0.42899  | 0.3814   | 0.60954  | 0.2694   | 0.37168  | 0.29169  | 0.34697  | 0.29291  | 0.37165  | 0.42588  | 0.37119  | 0.29251  | 0.12717  | 0.23227  | 0.16509  | 7.34E-06 | -0.12695 | -0.18351 | -0.08571 |
| PF14_0496         | 0.84095  | 1.42747  | 1.4389   | 1.74826  | 1.35854  | 1.93251  | 1.88768  | 1.77259  | 1.37866  | 1.05275  | 0.74339  | 0.60686  | 0.40937  | 0.11473  | -0.06244 | -0.20349 | -0.55623 | -0.62962 | -0.55038 | -0.7744  | -0.35155 | -0.10764 | 0.07132  | 0.39246  |
| PFI11_0441a       | 0.38006  | 0        | -0.20606 | 0.34528  | 0.57742  | 0.48014  | 0.39468  | 0.39177  | 0.06505  | 0.1273   | 0.28846  | 0.22575  | 0.28821  | 0.2723   | 0.3998   | 0.4688   | 0.38068  | 0.37879  | 0.72915  | 0.39085  | 0.4949   | 0.2897   | 0.27851  | 0.33096  |
| PF14_0425         | 0.02291  | -0.83969 | -1.20331 | -1.07465 | -1.12511 | -0.8562  | -0.63562 | -0.35074 | -0.18859 | 0        | -0.05349 | -0.16332 | -0.21706 | -0.20285 | -0.08371 | -0.11974 | -0.36101 | -0.25445 | -0.08843 | -0.05528 | -0.0836  | -0.18645 | -0.06651 | 0.1487   |
| MAL5_trNA_Glu1    | 0.31619  | 0.98863  | -0.42277 | -0.22668 | -1.27886 | -0.26327 | -0.86722 | 0.21258  | -1.15881 | -0.43020 | -1.04678 | -0.8063  | -1.02205 | -1.36403 | -0.21779 | -0.91712 | 0.7526   | -0.51996 | -0.54267 | -0.0756  | 0.89671  | 0.12077  | -0.45561 |          |
| MAL13P1.185       | -1.40011 | -1.04991 | -1.14503 | -1.2196  | -0.7899  | -0.2512  | 0.50933  | 0.87508  | 1.2843   | 1.38027  | 1.52146  | 1.37034  | 1.21412  | 0.64145  | 0.36502  | 0.04717  | -0.17358 | -0.32663 | -0.67214 | -0.9402  | -0.8975  | -0.79631 | -0.92565 | -0.7562  |
| PF14_0641         | -0.87723 | -0.73758 | -0.80985 | -1.08412 | -1.16789 | -1.26911 | -1.31064 | -1.20612 | -0.45243 | -0.00102 | 0.4371   | 0.75891  | 0.94459  | 0.8618   | 1.01163  | 0.94987  | 0.4662   | 0.50649  | 0.4992   | 0.10752  | -0.21649 | -0.55275 | -0.72592 | -0.86009 |
| PF14_0223         | -0.26409 | 0.28741  | 0.6081   | 0.62347  | 0.6834   | 0.83658  | 0.8296   | 0.73662  | 0.92153  | 0.95842  | 0.887    | 0.98364  | 0.91522  | 0.64127  | 0.39126  | 0.12915  | -0.08057 | -0.25354 | -0.30418 | -0.50163 | -0.48142 | -0.27007 | -0.17437 | 0.00053  |
| PF14_0045         | 1.10486  | 1.36019  | 1.30576  | 1.65878  | 1.7418   | 1.37138  | 1.10345  | 0.74814  | 0.39734  | 0.08021  | -0.47453 | -1.1416  | -1.94271 | -2.72909 | -3.20165 | -3.43393 | -3.51852 | -3.48135 | -1.88974 | -0.84502 | -0.15307 | 0.06673  | 0.66983  | 0.97972  |
| PFI0395w          | 0.13826  | -0.41756 | -1.12772 | -0.71886 | -0.90394 | -1.10182 | -1.11277 | -1.34067 | -1.36725 | -0.98738 | -0.83253 | -0.50168 | -0.26862 | 0.06007  | 0.29561  | 0.4453   | 0.88758  | 0.72842  | 0.8479   | 0.76218  | 0.60876  | 0.49136  | 0.31475  | 0.00773  |
| PF10_0174         | -0.52085 | -0.54217 | -0.33844 | -0.40814 | -0.59493 | -0.46458 | -0.30198 | -0.06616 | 0.02317  | 0.17293  | 0.4161   | 0.69342  | 0.75826  | 0.7975   | 0.82707  | 0.87711  | 0.15825  | 0.5697   | 0.43655  | -0.08602 | -0.2843  | -0.45914 | -0.5388  | -0.86292 |
| PF10_API0024:tRNA | 0.0636   | -0.43647 | -0.78095 | -1.27675 | -1.40865 | -1.24118 | -1.29773 | -0.9911  | -0.65737 | -0.40789 | -0.4702  | -0.11416 | -0.23114 | 0.02646  | 0.29148  | 1.00311  | 0.7299   | 1.43587  | 0.73891  | 0.68169  | 0.26934  | 0.71161  | -0.27225 | -0.64344 |
| PF14_0024         | -0.18318 | -0.55558 | -0.52318 | -0.79645 | -1.12139 | -1.40708 | -1.49479 | -1.40489 | -1.8694  | -1.88454 | -1.32999 | -1.14323 | -0.8362  | -0.73845 | -0.07594 | 0.3278   | 0.6778   | 0.03329  | 1.24672  | 0.60329  | 0.5047   | 0.15521  | 0.29157  | 0.31265  |
| PF11_0354         | -0.40064 | -0.50942 | -0.3594  | -0.90783 | -0.94667 | -1.10704 | -1.13388 | -1.43038 | -1.52106 | -1.92561 | -1.68502 | -1.35198 | -0.78343 | -0.04729 | 0.52093  | 0.80838  | 1.09397  | 0.98118  | 0.13484  | 0.55463  | 0.51284  | 0.17743  | -0.17302 | -0.50674 |
| PF11_0064         | 0.5043   | -0.27304 | -0.87833 | -0.63592 | -0.74789 | -0.88835 | -0.82275 | -0.84326 | -0.52829 | -0.55624 | -0.71281 | -0.52845 | -0.50675 | -0.11372 | -0.1775  | 0.1827   | 0.65269  | 0.45825  | 1.28932  | 1.09499  | 1.07759  | 0.7863   | 0.95602  | 0.58096  |
| PF11_0229         | -0.28044 | -0.59047 | -1.15851 | -0.02975 | -0.27288 | -0.49669 | -0.40891 | -0.27097 | -0.52983 | -0.34197 | 0.02772  | 0.13845  | 0.43763  | 0.4682   | -0.75735 | 0.6604   | 0.40909  | 0.36943  | 0.3444   | -0.04078 | -0.25107 | -0.16431 | -0.31044 | -0.23749 |
| PF14_0479         | 0.27551  | 0.32549  | 0.60705  | 0.84862  | 0.92786  | 0.79548  | 0.57075  | 0.69093  | 0.31675  | 0.39482  | 0.3458   | 0.41902  | 0.40948  | 0.40198  | 0.1784   | 0.10231  | -0.00856 | 0.03016  | -0.04232 | -0.08561 | 0.08501  | -0.00166 | -0.02331 | 0.01534  |
| PF10_0311         | -0.10625 | -0.48277 | -0.67917 | -0.90373 | -1.17185 | -1.23713 | -1.21455 | -0.71583 | -0.7093  | -0.47223 | -0.05289 | -0.052   | 0.14093  | -0.09478 | 0.34487  | 0.53246  | 0.20176  | 0.53494  | 0.71957  | 0.29823  | 0.2719   | -0.08295 | -0.20333 | -0.15135 |
| PF11_0327         | 0.25646  | -0.47774 | -0.49425 | -0.7371  | -0.66879 | -0.7119  | -0.29897 | 0.23599  | 0.68717  | 0.74689  | 0.548    | 0.41983  | 0.13996  | 0.0919   | -0.138   | -0.28961 | -0.3412  | -0.26147 | 0.57791  | 0.3785   | 0.5649   | 0.4108   | 0.5767   | 0.76701  |
| PFI1085w          | 0.60275  | 0.50927  | 0.27894  | 0.13057  | 0.266    | 0.0797   | 0.08008  | -0.19655 | -0.36591 | -0.64637 | -1.05451 | -1.28978 | -1.44638 | -1.25857 | -0.75145 | -0.14639 | 0.26317  | 0.50984  | 0.57832  | 1.12304  | 1.24148  | 1.15182  | 1.14657  | 0.86331  |
| PFI1285w          | 1.47165  | 0.88012  | 0.40114  | 0.43821  | 0.53605  | 0.14275  | -0.07776 | -0.01056 | -0.34848 | -0.29473 | -0.14925 | -0.0459  | -0.19648 | -0.1291  | -0.40059 | -0.45623 | -0.12424 | 0.28435  | 0.40698  | 0.93553  | 1.33882  | 1.18344  | 1.06571  | 1.28899  |
| PFE1150w          | 0.87933  | 0.7864   | 0.7341   | 1.05877  | 0.96881  | 0.34957  | 0.09645  | -0.22217 | -0.33808 | -0.13804 | -0.26953 | -0.36649 | -0.29767 | -0.2818  | -0.71439 | -1.09227 | -1.10491 | -1.6358  | -1.26753 | -0.62843 | 0.07138  | 0.10028  | 0.61732  | 0.81382  |
| PFF0720w          | -0.19433 | -0.34432 | -0.62948 | -0.81912 | -0.8946  | -1.04769 | -1.16918 | -1.22953 | -1.44445 | -1.3049  | -1.31318 | -0.9031  | -0.41751 | 0.20153  | 0.33968  | 0.53753  | 0.50532  | 0.70476  | 0.47239  | 0.63382  | 0.44346  | 0.21363  | -0.00961 | -0.29556 |
| PDF0400w          | 1.4366   | 1.3613   | 0.87453  | 1.2442   | 1.18331  | 0.70926  | 0.47794  | 0.24774  | -0.15572 | -0.24402 | -0.42363 | -0.35747 | -0.60178 | -0.47435 | -0.31021 | -0.18872 | 0.22933  | 0.36588  | 0.4266   | 0.88517  | 1.17788  | 1.03205  | 1.09198  | 1.0868   |
| PF14_0050         | -0.21732 | -0.10881 | 0.1166   | 0.13525  | 0.10491  | 0.1428   | 0.15383  | 0.05243  | -0.00945 | 0.0714   | 0.13044  | 0.27432  | 0.10701  | 0.2392   | 0.17076  | 0.23061  | 0.16619  | 0.25814  | 0.44653  | 0.14929  | 0.03279  | -0.10481 | -0.11893 | -0.22973 |
| PF14_0197         | 1.13511  | 1.17614  | 1.01318  | 0.79401  | 0.7233   | 0.71282  | 0.72355  | 0.80486  | 0.57174  | 0.44905  | 0.21501  | -0.42432 | -0.95927 | -1.36424 | -1.3216  | -1.40319 | -0.99721 | -0.68161 | 0.45747  | 0.36955  | 0.49736  | 0.67766  | 0.79612  | 1.1988   |
| PDF1100c          | 0.23495  | -0.40596 | -0.58832 | -0.19369 | -1.40333 | -1.91436 | -2.14428 | -2.51095 | -3.27907 | -3.58561 | -3.45493 | -3.89432 | -3.8024  | -3.11964 | -1.6195  | -0.37537 | 0.78457  | 0.71545  | 1.10198  | 1.21998  | 1.13746  | 0.57555  | 0.66912  | 0.22153  |
| PF08_0068         | -0.05155 | -0.39111 | -0.23326 | -0.54341 | -0.39735 | -0.48092 | -0.38947 | -0.08365 | 0.2658   | 0.56548  | 0.67977  | 0.63288  | 0.57519  | 0.56311  | 0.50904  | 0.41585  | 0.40816  | 0.10184  | 0.38179  | 0.2747   | 0.1144   | 0.07754  | 0.06148  | 0.1552   |
| PFL1870c          | -0.10576 | -0.40577 | -0.7426  | -0.76376 | -0.92838 | -1.21169 | -1.28062 | -1.5549  | -1.63119 | -1.70336 | -1.46828 | -1.43652 | -1.26666 | -0.94763 | 0.03572  | 0.65696  | 0.88434  | 0.74926  | 1.25858  | 0.88996  | 0.7816   | 0.40816  | 0.3892   | 0.02814  |
| PFL1425w          | -0.72566 | -0.28373 | 0.05497  | -0.12965 | -0.2223  | 0.01928  | 0.19592  | 0.31135  | 0.56813  | 0.67036  | 0.90683  | 0.97058  | 1.05662  | 0.62537  | 0.48608  | 0.04544  | -0.54263 | -0.85648 | -0.9092  | -1.2951  | -1.12717 | -0.73425 | -0.73329 | -0.65957 |
| PF11_0292         | -0.97717 | -0.60865 | 0.10424  | -0.2947  | -0.30376 | -0.01675 | 0.10096  | 0.18474  | 0.49051  | 0.66631  | 0.84798  | 0.94156  | 1.0012   | 0.64785  | 0.78151  | 0.45643  | -0.12221 | -0.02744 | -0.28691 | -0.61086 | -0.8015  | -0.71066 | -0.56671 | -0.55483 |
| PFL2145w          | -0.15879 | 0.33365  | 0.17739  | 0.8342   | 1.01092  | 0.57332  | 0.25926  | 0.34011  | -0.21037 | -0.40346 | -0.09904 | -0.32902 | -0.55651 | -0.79179 | -0.50337 | -0.54011 | -0.2769  | -0.21194 | -0.34353 | -0.22633 | -0.15505 | -0.04605 | 0.66461  | 1.10149  |
| PDF0080c          | -0.9562  | -1.36065 | -1.1339  | -1.24208 | -1.13812 | 0.18471  | 1.52471  | 1.8861   | 2.49505  | 2.09529  | 1.61566  | 1.24904  | 0.01733  | -1.19729 | -2.13922 | -2.14351 | -1.94861 | -1.51296 | -0.89438 | -0.91397 | -0.99296 | -0.80819 | -0.82642 | -0.81581 |
| PF10_0266         | 1.01164  | 1.37648  | 1.31542  | 1.66023  | 1.36865  | 1.21571  | 1.02001  | 0.96443  | 1.0875   | 0.98221  | 0.89212  | 0.77116  | 0.5014   | 0.2811   | 0.1293   | -0.4593  | -0.77577 | -1.04238 | -0.80313 | -0.39732 | 0.12343  | 0.60267  | 0.7967   | 1.00394  |
| PDF0305c          | -0.8705  | -0.63222 | -0.30475 | -0.14534 | -0.06718 | 0.29456  | 0.29213  | 0.35278  | 0.31119  | 0.25919  | 0.42946  | 0.43305  | 0.62104  | 0.29127  | 0.36298  | 0.30732  | -0.14842 | -0.09623 | -0.19322 | -0.60061 | -0.79747 | -0.82869 | -0.80916 | -0.      |



|                     |          |          |          |          |          |          |          |          |          |          |          |          |          |           |          |          |          |          |          |           |          |          |          |          |         |
|---------------------|----------|----------|----------|----------|----------|----------|----------|----------|----------|----------|----------|----------|----------|-----------|----------|----------|----------|----------|----------|-----------|----------|----------|----------|----------|---------|
| PFF1155w            | -0.87929 | -0.58955 | -0.34972 | -0.3565  | -0.2322  | 0.05353  | 0.1193   | 0.27352  | -0.09007 | 0.07287  | 0.62573  | 0.07648  | 0.33647  | 0.31009   | 0.49441  | 0.28735  | -0.02652 | -0.28068 | -0.37716 | -0.99414  | -1.1683  | -1.15463 | -1.25997 | -1.14428 |         |
| PF0210c             | -0.20607 | -0.76473 | -0.66929 | -0.27367 | -0.52157 | -0.53668 | -0.45964 | -0.2354  | -0.04954 | 0.36359  | 0.21388  | 0.51792  | 0.4763   | 0.542     | 0.4139   | 0.34366  | 0.40839  | 0.21989  | -0.04437 | -0.0082   | -0.1964  | -0.18658 | -0.02952 | -0.15857 |         |
| PFI0325c            | -0.78334 | -0.78667 | -0.89204 | 0.13943  | 1.02726  | 0.80982  | 0.65546  | 0.4867   | 0.52692  | 0.59199  | 0.42666  | 0.4343   | -0.06664 | -0.39914  | -1.1007  | -1.50765 | -1.85229 | -1.85807 | -1.82839 | -0.88448  | -0.51081 | -0.26768 | 0.14308  | 0.21823  |         |
| PFI0300w            | -0.4595  | -0.32439 | -0.29311 | -0.21194 | -0.40386 | -0.37712 | -0.24371 | -0.20239 | -0.29596 | 0.06478  | 0.35625  | 0.32988  | 0.52751  | 0.37491   | 0.63633  | 0.7352   | 0.39756  | 0.22475  | 0.88482  | -0.00588  | 0.04459  | -0.06247 | -0.18531 | -0.43538 |         |
| MAL13P1.28          | 0.11146  | 0.46374  | 0.47726  | 0.5883   | 0.71148  | 0.85516  | 0.93686  | 0.86375  | 1.03231  | 0.8377   | 0.80208  | 0.82195  | 0.68936  | 0.44347   | 0.33764  | 0.12245  | -0.19863 | -0.15708 | -0.31609 | -0.65567  | -0.55207 | -0.28612 | -0.21227 | -0.17026 |         |
| PF14_0691           | 0.61255  | 0.02131  | -0.12051 | 0.14031  | 0.21473  | -0.00288 | 0.02324  | 0.0317   | -0.08843 | -0.32578 | -0.54316 | -0.4199  | -0.61767 | -0.59332  | -0.75283 | -0.50935 | -0.34213 | -0.05208 | 0.98789  | 0.74194   | 0.57759  | 0.56309  | 0.85996  | 0.95304  |         |
| PFL1400c            | -0.53297 | -0.05328 | 0.07208  | 0.16     | 0.21771  | -0.1898  | 0.19412  | 0.47491  | 0.78114  | 0.85777  | 0.93805  | 0.91154  | 0.74757  | 0.3612    | 0.08357  | -0.33153 | -0.44854 | -0.76715 | 0.94922  | -1.17337  | -0.95788 | -0.69603 | -0.68083 | -0.50129 |         |
| PF14_0354           | -0.37202 | -0.52544 | -0.5097  | -0.36156 | -0.43262 | -0.2214  | 0.02479  | 0.34472  | 0.39003  | 0.43793  | 0.68005  | 0.78942  | 0.8261   | 0.71779   | 0.62002  | 0.50688  | 0.15765  | 0.19467  | 0.08384  | -0.30771  | -0.52043 | -0.81239 | -0.91481 | -1.13762 |         |
| PF14_0505           | 0.03874  | 0.02531  | -0.3746  | -0.27136 | -0.54299 | -0.54863 | -0.60501 | -0.56589 | -0.53131 | -0.49441 | -0.43223 | -0.1249  | -0.01883 | 0.11146   | 0.30641  | 0.46054  | 0.22019  | 0.65197  | 0.72823  | 0.6182    | 0.37881  | 0.26389  | -0.07099 | -0.1852  |         |
| MAL8P1.107          | -0.68884 | -0.05945 | -0.20701 | -0.1072  | 0.28126  | 0.51535  | 0.85289  | 1.14976  | 1.05843  | 0.93482  | 1.02031  | 0.89281  | 0.77424  | 0.39174   | 0.48246  | 0.25462  | 0.01523  | -0.05397 | -0.02593 | -0.4887   | -0.72373 | -0.18603 | -0.58753 | -0.53809 |         |
| PFF0815w            | -0.67984 | -0.81252 | -0.56264 | -0.63677 | -0.40208 | 0.14634  | 0.60323  | 0.71904  | 0.60943  | 0.42794  | 0.33361  | 0.35896  | 0.47764  | 0.41442   | 0.5283   | 0.53297  | 0.34556  | 0.35378  | 0.36135  | 0.0673    | -0.18569 | -0.44558 | -0.38502 | -0.37979 |         |
| PF14_0615           | 0.74629  | 0.4743   | 0.09796  | 0.38379  | 0.44628  | 0.50024  | 0.37342  | 0.43738  | 0.15014  | 0.07954  | 0.03614  | -0.06389 | -0.36787 | -0.39472  | -0.33971 | -0.0998  | -0.25671 | -0.03275 | 0.97678  | 0.68298   | 0.73091  | 0.6511   | 0.74845  | 0.76452  |         |
| PF07_0108           | -0.21352 | -0.31662 | -0.41299 | -0.63468 | -0.58898 | -0.76718 | -0.82021 | -0.59621 | -0.51253 | -0.21041 | -0.27708 | -0.13724 | -0.0988  | -0.01886  | 0.21665  | 0.33143  | 0.29813  | 0.47029  | 0.20601  | 0.06378   | 0.06047  | 0.18193  | -0.06509 | -0.10082 |         |
| PF13_0313           | 0.30184  | 0.8036   | 1.28921  | 1.46914  | 1.42489  | 1.61236  | 1.62648  | 1.75853  | 1.88777  | 1.57742  | 1.25897  | 0.9995   | 0.62989  | 0.21571   | -0.02352 | -0.41313 | -0.84113 | -0.93084 | -0.83363 | -1.13572  | -0.87906 | -0.59017 | -0.34845 | 0.02595  |         |
| 1400.pre-tRNA-Gln-1 | 0.81978  | 1.5274   | 0.36645  | 0.08249  | -0.31635 | 0.36894  | -0.07522 | 0.47156  | 0.31283  | 0.72976  | -0.26675 | -0.25043 | -0.59971 | -0.64616  | -0.53004 | 0.21241  | -0.41866 | 1.39058  | -0.56873 | -0.85949  | -0.33116 | 1.90209  | -0.15161 | -0.4134  |         |
| MAL13P1.29          | 0.01617  | -0.37882 | -0.5992  | -1.1101  | -1.27742 | -1.5206  | -1.62164 | -1.8925  | -2.0569  | -2.24615 | -1.70963 | -1.89746 | -1.39066 | -0.53274  | 0.34761  | 0.76601  | 1.41385  | 0.93025  | 0.70775  | 1.1914    | 0.90351  | 0.40947  | 0.14979  | -0.3169  |         |
| PF14_0678           | -0.59818 | -0.878   | -1.22945 | -0.97698 | -0.86591 | -0.98932 | -1.13373 | -0.44585 | 0.6688   | 0.6626   | 0.53233  | 0.8992   | 0.82996  | 0.78371   | -0.04379 | -0.41045 | -0.24394 | -0.92103 | -1.00846 | -0.69013  | -0.63471 | -0.89899 | -0.21066 | -0.23876 |         |
| PFI0375w            | -0.53174 | -0.5467  | -0.60192 | -0.67103 | -0.62746 | -0.6114  | -0.71758 | -0.84408 | -1.13055 | -1.13315 | -0.83253 | -0.63508 | -0.22212 | -0.08653  | 0.6521   | 0.79008  | 0.66704  | 0.75592  | 0.61282  | 0.432     | 0.137    | -0.28844 | -0.33349 | -0.38635 |         |
| PF14_0283           | -0.18828 | 0.00719  | 0.03867  | 0.20632  | 0.313    | 0.50063  | 0.51128  | 0.4115   | 0.63904  | 0.59455  | 0.71667  | 0.71662  | 0.72462  | 0.58588   | 0.53239  | 0.41508  | 0.18294  | 0.16848  | -0.06229 | -0.36796  | -0.47928 | -0.39456 | -0.30738 | -0.28485 |         |
| PF13_0214           | -0.82341 | -0.45744 | -0.30059 | -0.15371 | -0.05874 | -0.0102  | -0.27275 | -0.17612 | -0.13045 | 0.24306  | 0.52723  | 0.25011  | 0.37404  | 0.22711   | 0.35282  | 0.08711  | -0.08126 | -0.3609  | -0.54642 | -1.54588  | -1.41717 | -0.84495 | -1.21056 | -1.12305 |         |
| PFL0735w            | 0.01981  | -0.10189 | -0.62238 | -0.43093 | -0.61767 | -0.59758 | -0.5286  | -0.60891 | -0.53008 | -0.16786 | -0.22228 | 0.36631  | 0.51064  | 0.48432   | -0.50498 | 0.92295  | 0.42615  | 0.86296  | 0.92125  | 0.41947   | 0.15676  | -0.02487 | -0.18607 | -0.23653 |         |
| PF10_0114           | -0.55829 | -0.30625 | -0.13782 | -0.11506 | -0.06135 | 0.05946  | 0.38458  | 0.34579  | 0.6891   | 0.6371   | 0.58052  | 0.5366   | 0.3847   | 0.30445   | 0.2253   | 0.05159  | -0.0189  | -0.25529 | -0.52524 | -0.49571  | -0.58335 | -0.6445  | -0.52872 | -0.4531  |         |
| PF14_0513           | 0.3655   | 0.5758   | 1.02367  | 0.51294  | 0.37973  | 0.59712  | 0.62419  | 0.74003  | 1.05747  | 0.87272  | 0.78814  | 0.9278   | 0.60654  | 0.52469   | 0.44268  | 0.36638  | 0.12333  | -0.11524 | -0.18215 | -0.09423  | -0.24685 | -0.08746 | -0.05801 | 0.06663  | 0.25844 |
| PF14_0081           | -0.71685 | -0.55623 | -0.17282 | -0.38376 | -0.49236 | -0.46432 | -0.23876 | -0.14273 | 0.32748  | 0.45269  | 0.63272  | 0.76346  | 0.46311  | 0.51663   | 0.36251  | 0.15438  | 0.17866  | -0.11985 | -0.05099 | -0.32371  | -0.48483 | -0.43707 | -0.42414 | -0.50633 |         |
| PF08_0007           | 0.2289   | -0.21204 | -0.50705 | -0.66011 | -0.89053 | -0.97024 | -1.19707 | -1.25849 | -1.74967 | -2.02571 | -2.14081 | -1.72525 | -1.49618 | -0.92556  | 0.12573  | 0.72443  | 0.67409  | 0.68101  | 1.45816  | 1.04657   | 0.73424  | 0.28648  | 0.30727  | 0.03042  |         |
| MAL13P1.84          | 0.44743  | 0.5338   | 0.66395  | 0.97954  | 0.97376  | 1.0842   | 0.93046  | 0.91986  | 0.635    | 0.44145  | 0.59417  | 0.41923  | 0.33492  | 0.12246   | -0.00384 | -0.02539 | 0.25672  | 0.00141  | 0.42807  | 0.2977    | 0.4873   | 0.51162  | 0.7402   | 0.89817  |         |
| PFL2480w            | 0.29511  | 0.63357  | 0.68137  | 0.57902  | 0.58121  | 0.40295  | 0.45766  | 0.63512  | 0.73384  | 0.56029  | 0.68326  | 0.44626  | 0.26584  | 0.11799   | -0.03267 | -0.35031 | -0.37044 | -0.69188 | -1.08551 | -0.62812  | -0.26295 | -0.18102 | 0.06353  | 0.29526  |         |
| PFC10_API0023:tRNA  | -0.27205 | -0.82564 | -3.42924 | -1.26409 | -1.52347 | -1.20423 | -1.65755 | -1.27902 | -1.23594 | -1.06978 | -0.99346 | -0.57961 | -0.39675 | -0.21192  | 0.37673  | 1.10348  | 0.13394  | 1.3629   | 0.64742  | 0.15543   | 0.04607  | 0.51337  | -0.09319 | -0.4071  |         |
| PFL1470c            | 1.00824  | 1.31359  | 1.27136  | 1.67099  | 1.74408  | 1.22034  | 1.66353  | 1.5671   | 1.32603  | 1.11553  | 1.01857  | 0.86128  | 0.45668  | 0.1653    | -0.07476 | -0.41048 | -0.8295  | -0.7543  | -0.70718 | -0.85528  | -0.72504 | -0.32573 | -0.05924 | 0.32485  |         |
| PF11_0093           | 0.7196   | 0.91228  | 0.77826  | 0.9959   | 0.672    | 0.75289  | 0.69507  | 0.61108  | 0.42758  | 0.21751  | 0.18695  | 0.28909  | 0.04032  | -0.09881  | -0.04477 | -0.35477 | -0.67722 | -0.42448 | -0.003   | -0.069    | 0.31493  | 0.63155  | 0.75142  | 0.6987   |         |
| PFI0500w            | -0.10692 | -0.18218 | -0.09451 | 0.03472  | 0.14524  | 0.10212  | 0.28472  | 0.6382   | 0.39855  | 0.38506  | 0.37108  | 0.21746  | -0.05443 | -0.26579  | -0.17975 | -0.08974 | 0.01487  | 0.04917  | 0.15823  | -0.06227  | -0.15661 | -0.18784 | -0.10317 | 0.07266  |         |
| PFB0520w            | -1.09212 | -0.78795 | -1.29541 | -1.53957 | -1.40722 | -1.40659 | -0.81437 | -0.60566 | -0.35543 | 0.38702  | 0.44619  | 0.37229  | 0.90443  | 0.84757   | 0.29026  | 0.09014  | 0.34843  | -0.11716 | -0.62647 | -0.47583  | -0.96631 | -1.05457 | -1.12297 | -1.23728 |         |
| PFD0795w            | -0.80689 | -1.13909 | -0.81748 | -1.37054 | -1.28453 | -1.29157 | -1.27068 | -1.15365 | -0.84861 | -0.56859 | -0.4617  | -0.26053 | 0.08564  | 0.56921   | 0.42409  | 0.79278  | 0.43182  | 0.63595  | -0.06641 | 0.20087   | 0.09609  | -0.17136 | -0.5269  | -0.79317 |         |
| PF11_0464           | -0.13618 | -0.79348 | -0.73874 | -1.15748 | -1.32203 | -2.24155 | -2.7319  | -2.91819 | -3.42016 | -3.3897  | -3.56815 | -3.6959  | -3.04366 | -1.133815 | 0.20994  | 1.14891  | 1.4318   | 0.66175  | 1.16916  | 1.24179   | 0.85106  | 0.47384  | -0.27801 |          |         |
| PFF0750w            | -0.51921 | -0.71737 | -0.71018 | -0.76266 | -0.67802 | -0.66505 | -0.79667 | -0.59276 | -0.636   | -0.60705 | -0.34819 | -0.1262  | 0.14477  | 0.38941   | 0.80439  | 0.89667  | 0.55429  | 0.55976  | 0.53296  | 0.13113   | 0.03772  | -0.38787 | -0.51775 | -0.64117 |         |
| PF10_0367           | 0.55943  | 0.19206  | -0.28358 | -0.21383 | -0.05843 | -0.43639 | -0.46921 | -0.17194 | -0.12771 | 0.14024  | 0.08093  | -0.06161 | -0.6486  | -0.81834  | -1.13773 | -0.84793 | -0.78946 | 0.25054  | 0.83989  | 1.09256   | 1.0129   | 0.79015  | 1.08382  | 1.10739  |         |
| PF10_0018           | 1.30854  | 1.61897  | 1.43078  | 1.90041  | 1.87067  | 1.95636  | 1.79277  | 1.40049  | 0.80911  | 0.17979  | -0.43789 | -0.89675 | -1.29538 | -1.61079  | -2.16069 | -1.81346 | -1.60947 | -2.20402 | -1.63721 | -1.36475  | -0.44426 | 0.31921  | 0.50857  | 0.94851  |         |
| MAL13P1.224         | 0.22356  | 1.26957  | 0.48553  | 0.97287  | 0.98033  | 1.0327   | 0.86425  | 0.85529  | 0.6454   | 0.32817  | 0.4555   | 0.50238  | 0.47614  | 0.34176   | 0.3711   | 0.275    | 0.20281  | -0.07609 | 0.75479  | 1.17714   | 0.42382  | 0.51962  | 0.52809  | 0.65877  |         |
| MAL13P1.308         | 0.40018  | -0.63555 | -0.88167 | -1.19494 | -1.38259 | -1.81466 | -2.3237  | -2.66838 | -3.00613 | -3.82759 | -3.84105 | -3.81993 | -3.5168  | -2.76646  | -1.52336 | -0.58857 | 0.19441  | 0.3276   | 1.52704  | 1.25475   | 1.14823  | 0.89322  | 1.09999  | 0.93994  |         |
| MAL8P1.42           | -0.06778 | 0.09533  | -0.4969  | 0.48089  | 0.44023  | 0.81449  | 0.77578  | 0.61006  | 0.47192  | 0.66286  | 0.58062  | 0.61185  | 0.52691  | 0.15513   | 0.41192  | 0.23497  | 0.27978  | -0.04583 | 0.15356  | -0.04119  | -0.09098 | -0.14594 | -0.10462 | -0.06083 |         |
| PF10_0287           | 0.09252  | 0.38432  | 0.29409  | 0.72789  | 0.57427  | 0.60698  | 0.62331  | 0.62609  | 0.36678  | 0.34741  | 0.31343  | 0.2488   | -0.01729 | 0.04823   | 0.17237  | -0.09195 | 0.17405  | 0.50555  | 0.12518  | 0.00274</ |          |          |          |          |         |

|               |          |          |          |          |          |          |          |          |          |          |          |          |          |          |          |          |          |          |          |          |          |          |          |          |
|---------------|----------|----------|----------|----------|----------|----------|----------|----------|----------|----------|----------|----------|----------|----------|----------|----------|----------|----------|----------|----------|----------|----------|----------|----------|
| PFD0230c      | 0.0551   | -0.36195 | -0.42198 | -1.16095 | -1.60026 | -1.82073 | -2.13094 | -2.71009 | -3.02648 | -3.33885 | -3.61298 | -3.82696 | -3.72258 | -3.086   | -1.44479 | -0.07075 | 1.0039   | 0.86365  | 1.41534  | 1.29035  | 1.16484  | 0.96486  | 0.90102  | 0.20235  |
| PF11_0106     | 0.04287  | 0.19395  | 0.79108  | 0.63319  | 0.67718  | 0.99522  | 0.62342  | 0.41085  | 0.61357  | 0.63662  | 0.41658  | 0.78508  | 0.45457  | 0.29177  | 0.23586  | -0.37067 | -0.85745 | -0.46177 | -1.02632 | -1.4837  | -1.40252 | -1.03907 | -0.80004 | -0.36201 |
| PFL0692c      | -0.39797 | -0.04612 | 0.27674  | 0.14853  | 0.26555  | 0.38664  | 0.3501   | 0.40493  | 0.22115  | 0.25526  | 0.0422   | 0.12896  | 0.59195  | 0.41215  | 0.45563  | 0.3542   | 0.12328  | -0.06104 | -0.38571 | -0.62521 | -0.93004 | -0.69964 | -0.60589 | -0.40221 |
| PFL0690c      | -0.76589 | -0.25363 | 0.12012  | -0.26465 | -0.14454 | -0.26522 | -0.27804 | 0.62334  | 1.08725  | 0.91769  | 1.05095  | 1.00617  | 0.94105  | 0.67418  | 0.27941  | 0.15518  | -0.26964 | -0.21985 | -0.40681 | -0.66208 | -0.77903 | -0.53936 | -0.78139 | -0.58852 |
| MAL7P1.129    | -0.78013 | -0.52827 | -0.36417 | -0.50543 | -0.30819 | -0.47878 | -0.18916 | -0.09929 | 0.43601  | 0.56961  | 0.40652  | 0.73064  | 0.81656  | 0.87187  | 0.54571  | 0.22408  | 0.32737  | 0.21757  | -0.90774 | -0.49287 | -0.65154 | -0.49064 | -0.55111 | -0.61958 |
| PFL0055c      | -0.85846 | -0.0676  | -0.28214 | -0.24267 | -0.37431 | 1.32976  | 2.68376  | 2.8199   | 3.07587  | 2.14578  | 1.53392  | 1.10069  | 0.7071   | 0.00438  | -0.38136 | -0.41626 | -0.81747 | -0.84078 | -0.85978 | -0.8143  | -0.78778 | -0.42834 | -0.74688 | -0.674   |
| MAL13P1.128   | -0.34564 | 0.0238   | -0.17743 | 0.08091  | 0.19599  | 0.06387  | -0.0793  | -0.11351 | -0.68001 | -0.27993 | 0.21035  | 0.19455  | 0.55356  | 0.34741  | 0.49671  | 0.38809  | 0.29936  | 0.11234  | 0.45811  | 0.01417  | 0.05601  | 0.09346  | 0.32417  | 0.5135   |
| PF10_0169     | 0.17057  | 0.68164  | 0.58946  | 0.81251  | 0.86903  | 0.96859  | 0.97212  | 0.86521  | 0.67078  | 0.29655  | 0.39349  | 0.25502  | 0.10292  | -0.18406 | -0.21481 | -0.46008 | -0.41217 | -0.44476 | -0.28037 | -0.41045 | -0.21572 | 0.07722  | 0.08144  | 0.40399  |
| PFB0470w      | -0.17749 | -0.00552 | 0.11267  | 0.12415  | 0.22066  | 0.48896  | 0.53356  | 0.64336  | 1.06002  | 1.03128  | 1.02521  | 1.11873  | 0.77101  | 0.55702  | 0.11766  | -0.19106 | -0.32227 | -0.24738 | -0.0039  | -0.06307 | 0.01244  | 0.13641  | 0.30955  | 0.44929  |
| PF14_0382     | -0.88497 | -1.00001 | -0.88734 | -0.79005 | -0.30846 | -0.02716 | 0.29975  | 0.39659  | 0.66524  | 0.71016  | 0.75152  | 0.76954  | 0.83251  | 0.78385  | 0.48922  | 0.28172  | 0.1408   | 0.10211  | -0.35514 | -0.3916  | -0.5916  | -0.72694 | -0.91736 | -0.89472 |
| PFC10_API0060 | -0.53075 | -1.11135 | -1.14211 | -1.66504 | -1.52353 | -1.73944 | -1.88438 | -1.41991 | -1.65026 | -1.25384 | -1.07864 | -0.89842 | -0.89876 | -0.46976 | 0.09244  | 0.74763  | 1.00846  | 1.21334  | 0.30159  | 0.13279  | -0.07319 | 0.4406   | -0.50374 | -0.69644 |
| PFL0600w      | -0.75771 | -0.61841 | -0.2528  | -0.28216 | -0.27108 | -0.03298 | -0.23889 | -0.37766 | -0.17159 | -0.03629 | 0.07683  | 0.17439  | 0.43127  | 0.66676  | 0.65048  | 0.4644   | 0.73186  | 0.25726  | 0.03424  | 0.00775  | -0.43939 | -0.46892 | -0.70342 | -0.47782 |
| PFA0405w      | -0.34013 | -0.6187  | -0.2732  | -0.465   | -0.06323 | 0.12755  | 0.14853  | -0.08496 | 0.19837  | 0.14325  | 0.29149  | 0.39763  | 0.2463   | 0.50153  | 0.46444  | 0.45516  | 0.15772  | 0.43283  | 0.39472  | 0.42882  | 0.12093  | -0.19914 | -0.1581  | -0.28018 |
| PF14_0363     | -0.17972 | -0.51733 | -0.6902  | -0.68574 | -0.6215  | -0.54482 | -0.40236 | -0.24424 | -0.13086 | -0.12795 | -0.52089 | -0.73125 | -0.77749 | -0.71352 | -0.65822 | -0.08298 | 0.64831  | 0.58089  | 0.66605  | 0.81962  | 0.82778  | 0.61178  | 0.44849  | 0.08237  |
| PF11_0198     | -1.02688 | 0.03502  | -0.32312 | 0.62183  | 0.50697  | 0.65986  | 0.75855  | 1.04336  | 0.81821  | 1.09897  | 0.9474   | 0.8145   | 0.70438  | 0.15173  | 0.11585  | -0.10406 | -0.22245 | -0.54721 | -0.42416 | -0.93329 | -1.14445 | -0.81121 | -0.80477 | -0.71787 |
| MAL13P1.16    | -0.63935 | -0.7328  | -0.42653 | -0.80327 | -0.47012 | -0.51374 | -0.5997  | -0.4445  | -0.63205 | -0.41871 | 0.14596  | 0.25111  | 0.41007  | 0.48691  | 0.80861  | 0.37468  | 0.36929  | 0.43032  | 0.19111  | -0.06441 | -0.70236 | -0.70029 | -0.63017 | -0.50147 |
| PF11_0373     | 0.5003   | -0.08591 | -0.49706 | -0.38942 | -0.46019 | -0.86199 | -1.06688 | -1.31312 | -1.74686 | -2.1028  | -0.20258 | -2.18432 | -2.35755 | -1.91375 | -0.82952 | 0.07802  | 0.94599  | 0.41274  | 0.22171  | 1.19886  | 1.26298  | 0.91962  | 0.79914  | -0.55428 |
| PF14_0484     | -1.2326  | -1.12036 | -1.1511  | -1.50083 | -1.33745 | -1.30072 | -1.2784  | -0.86237 | 0.20523  | 0.66406  | 1.03227  | 1.1078   | 1.15525  | 0.77956  | 0.68747  | 0.44349  | 0.33358  | -0.01002 | -0.24935 | -0.65672 | -1.00572 | -1.00211 | -1.04601 | -0.99772 |
| PF14_0347     | -0.72117 | -0.83684 | -0.9764  | -0.80284 | -0.41871 | -0.4186  | -0.58926 | -0.31237 | -0.18674 | 0.21613  | 0.38949  | 0.73086  | 0.66649  | 0.81258  | 0.55795  | 0.41026  | 0.23859  | 0.34275  | -0.0099  | 0.11043  | -0.20518 | -0.48059 | -0.59042 | -0.53892 |
| PFC0490w      | 0.88626  | 0.43477  | -0.13215 | 0.40036  | 0.42159  | -0.0778  | 0.08983  | 0.32949  | 0.49187  | 0.63057  | 0.76458  | 0.77333  | 0.72437  | 0.39851  | 0.16735  | -0.05799 | -0.36624 | -0.2104  | 0.25953  | 0.3987   | 0.7407   | 0.53904  | 0.74457  | 0.93895  |
| PF10_0037     | 0.58712  | 0.29609  | 0.17881  | 0.18375  | 0.07172  | 0.06705  | -0.02939 | -0.32527 | -0.47551 | -0.68003 | -0.91106 | -0.77665 | -0.85806 | -0.80446 | -0.54459 | -0.07608 | 0.57527  | 0.44452  | 1.07373  | 0.94699  | 1.03523  | 0.95554  | 0.93318  | 0.60147  |
| PFA0625w      | 0.03919  | -0.30117 | -0.18914 | -0.39008 | -0.46913 | -0.56402 | -0.42204 | -0.2892  | 0.03435  | 0.20476  | 0.10075  | -0.17381 | 0.17018  | 0.1619   | 0.00209  | 0.19434  | 0.68791  | 0.69156  | 0.18883  | 0.27632  | 0.61309  | 0.50963  | 0.06837  | -0.01533 |
| PF14_0408     | 0.118    | -0.13209 | 0.00154  | -0.14852 | -0.11904 | -0.30429 | -0.38372 | -0.5753  | -0.52709 | -0.37458 | -0.15576 | -0.09781 | -0.05708 | 0.1191   | 0.29289  | 0.35738  | 0.84046  | 0.27964  | 0.9663   | 0.77152  | 0.83343  | 0.37818  | 0.40203  | 0.34473  |
| PFL1320c      | 0.17114  | 0.52001  | 0.21801  | 0.27494  | 0.23046  | 0.4952   | 0.15303  | 0.04639  | -0.23162 | -0.2141  | -0.14038 | -0.12979 | -0.08197 | -0.0442  | 0.38007  | 0.46706  | 0.44164  | 0.33453  | 0.49831  | 0.29545  | 0.28182  | 0.09031  | 0.00696  | 0.15104  |
| PF14_0648     | 0.26733  | 0.21883  | 0.01968  | 0.17368  | -0.01692 | -0.0754  | -0.00806 | 0.18232  | 0.15937  | 0.16245  | -0.00353 | -0.01839 | -0.05913 | -0.08422 | 0.15248  | 0.17351  | 0.03619  | 0.262    | 0.18774  | -0.07697 | 0.15675  | 0.16605  | -0.1013  | 0.06343  |
| MAL7P1.36     | -0.19061 | -0.15458 | -0.2704  | -0.12548 | -0.07232 | -0.14049 | -0.10057 | 0.45899  | 0.24061  | 0.39468  | 0.61713  | 0.40306  | 0.32456  | 0.12453  | 0.26437  | 0.09571  | -0.11994 | -0.1903  | -0.15028 | -0.29148 | -0.34664 | -0.45754 | -0.18844 | 0.10565  |
| PFL1725w      | -0.68147 | -0.54553 | -0.83188 | -0.61191 | -0.64757 | -0.67499 | -0.9076  | -0.68513 | -0.5398  | -0.17973 | 0.48568  | 0.53588  | 0.84505  | 0.66914  | 0.7782   | 0.61     | 0.19879  | 0.32562  | 0.36716  | -0.17076 | -0.19436 | -0.41415 | -0.38159 | -0.36509 |
| PFE0555w      | -0.47905 | -0.87464 | -1.23803 | -1.4018  | -1.29194 | -1.74319 | -1.83228 | -1.96702 | -2.17374 | -1.80761 | -1.39416 | -0.93296 | -0.27535 | 0.3209   | 0.55853  | 0.75962  | 0.79507  | 0.8442   | 0.62828  | 0.49438  | 0.29219  | -0.21708 | -0.59896 | -0.90927 |
| PFI0655c      | -1.14398 | -0.71568 | -0.58479 | -0.52233 | -0.48453 | -0.09504 | -0.0057  | 0.8013   | 1.3203   | 0.95358  | 1.1711   | 1.2157   | 0.88967  | 0.5828   | 0.43326  | 0.27531  | -0.11083 | -0.0329  | 0.03676  | -0.16786 | -0.25492 | -0.30357 | -0.06883 | -0.02918 |
| PF14_0236     | 0.2508   | 0.35004  | 0.5312   | 0.40475  | 0.49602  | 0.53784  | 0.39392  | 0.2806   | 0.57867  | 0.26086  | 0.29325  | 0.35867  | 0.40017  | 0.40035  | -0.27509 | 0.1413   | 0.28369  | 0.17692  | 0.10848  | 0.12169  | 0.26377  | 0.44384  | 0.51297  | 0.5167   |
| PF11_0215     | -0.68615 | -0.68436 | -0.43081 | -0.76645 | -0.73384 | -0.6058  | -0.65943 | -0.42704 | -0.18897 | 0.33536  | 0.929    | 1.07685  | 0.89932  | 0.65407  | 0.59482  | 0.51401  | 0.10824  | -0.00044 | 0.26458  | -0.12992 | -0.38794 | -0.65026 | -0.59555 | -0.60833 |
| PF13_0038     | -0.12662 | -0.1321  | -0.25481 | -0.00071 | -0.00268 | -0.06298 | -0.26889 | 0.01598  | 0.05036  | 0.01536  | 0.07315  | 0.30101  | 0.42388  | 0.33054  | 0.55253  | 0.41582  | 0.61959  | 0.35382  | 0.12529  | 0.00315  | -0.02584 | 0.00241  | -0.22605 | -0.24999 |
| PFL1315w      | -0.35936 | -0.27553 | 0.00442  | -0.20672 | -0.13558 | -0.07276 | 0.01306  | 0.0146   | 0.38097  | 0.39485  | 0.38884  | 0.42383  | 0.42936  | 0.42275  | 0.16193  | 0.17615  | 0.04168  | 0.01295  | -0.18435 | -0.18709 | -0.35111 | -0.31697 | -0.45977 | -0.38678 |
| MAL13P1.48    | -0.0456  | 0.0224   | -0.50608 | -0.27646 | 0.19084  | -0.08037 | -0.03536 | 0.40557  | 0.86382  | 0.87684  | 0.88708  | 0.8155   | 0.57071  | 0.43636  | 0.09711  | 0.02184  | -0.06358 | 0.03795  | -0.39888 | 0.14471  | 0.25158  | 0.37987  | 0.36669  | 0.43278  |
| PF07_0007     | -1.80077 | -1.02248 | -0.90881 | -0.299   | 0.6996   | 1.89938  | 2.86688  | 2.75997  | 2.36168  | 1.43342  | 0.7254   | 0.42589  | -0.42398 | -0.84424 | -1.20414 | -1.70077 | -0.51702 | -2.22284 | -2.50658 | -3.20804 | -3.01101 | -2.47378 | -3.20999 | -1.66653 |
| PF08_0134     | -0.25558 | -0.29711 | -0.36274 | -0.25933 | -0.22826 | -0.0807  | -0.11662 | 0.10363  | -0.1362  | -0.15971 | 0.1949   | 0.33147  | 0.46764  | 0.37475  | 0.60076  | 0.58384  | 0.3135   | 0.22661  | 0.45365  | 0.08391  | -0.00749 | -0.1103  | -0.14463 | 0.12341  |
| PF08_0028     | 0.19921  | 0.52745  | 0.52847  | 0.56307  | 0.56745  | 0.46731  | 0.47273  | 0.46897  | 0.35121  | 0.44364  | 0.52404  | 0.50073  | 0.4757   | 0.48798  | 0.41049  | 0.21522  | -0.07676 | -0.09804 | -0.33136 | -0.34776 | -0.18271 | 0.02017  | -0.10558 | 0.13063  |
| PF07_0092     | 0.32557  | 0.56502  | 0.51057  | 0.39771  | 0.39943  | 0.26348  | 0.27255  | 0.3648   | 0.26435  | 0.27322  | 0.26038  | 0.08355  | 0.10451  | -0.18579 | -0.26085 | -0.47144 | -0.42678 | -0.43214 | -0.57592 | -0.45601 | -0.28158 | -0.13063 | -0.15799 | 0.06298  |
| PFD0835c      | -0.38749 | -0.06853 | 0.26823  | 0.25302  | 0.27731  | 0.44238  | 0.49631  | 0.54245  | 0.77664  | 0.70068  | 0.65231  | 0.632    | 0.59298  | 0.47254  | 0.28999  | -0.05511 | -0.10705 | -0.45719 | -0.55339 | -0.62894 | -0.66879 | -0.66104 | -0.5424  | -0.26422 |
| PFL1710c      | -0.29007 | -0.13934 | 0.20525  | 0.11457  | 0.33172  | 0.75004  | 0.85645  | 0.79957  | 0.70598  | 0.75993  | 0.76206  | 0.67815  | 0.7165   | 0.74995  | 0.58754  | 0.34097  | 0.37098  | -0.02    | -0.06636 | -0.17311 | -0.10516 | -0.10222 | -0.05703 | 0.14478  |
| PFL11_0254    | -0.30383 | 0.23642  | 0.17429  | -0.07872 | -0.25811 | -0.09091 | 0.12909  | 0.2768   | 0.52796  | 0.48507  | 0.55091  | 0.52596  | 0.57684  | 0.21686  | 0.47558  | 0.23243  | -0.00787 | -0.34651 | -0.36537 | -0.74389 |          |          |          |          |

|             |          |          |          |          |          |          |          |          |          |          |          |          |          |          |          |          |          |          |          |          |          |          |          |          |
|-------------|----------|----------|----------|----------|----------|----------|----------|----------|----------|----------|----------|----------|----------|----------|----------|----------|----------|----------|----------|----------|----------|----------|----------|----------|
| MAL8P1.49   | 0.46638  | 1.02994  | 1.23449  | 1.69408  | 1.67951  | 1.57394  | 1.56103  | 1.46013  | 1.24277  | 1.14928  | 1.00068  | 0.89062  | 0.57222  | 0.41927  | 0.12642  | -0.17907 | -0.75527 | -0.71468 | -0.89942 | -0.82366 | -0.6828  | -0.29286 | -0.09933 | 0.25222  |
| PF10_0067   | 0.4876   | 0.87636  | 1.05246  | 0.88393  | 0.80211  | 0.82492  | 0.83662  | 0.97423  | 0.88859  | 1.12118  | 0.84727  | 0.55495  | 0.32843  | -0.18626 | -0.59672 | -0.88325 | -0.85032 | -0.86862 | -1.09065 | -0.66639 | -0.42862 | 0.18762  | 0.40757  | 0.52153  |
| PFA0270c    | -0.4993  | -0.67091 | -0.64343 | -0.70997 | -0.65897 | -0.55044 | -0.47882 | -0.08295 | 0.56778  | 0.77465  | 0.90718  | 1.18149  | 1.02072  | 0.80228  | 0.67993  | 0.49846  | 0.06052  | 0.25146  | 0.0873   | -0.23849 | -0.39293 | -0.37417 | -0.34523 | -0.30658 |
| PF14_0711   | -0.17013 | -0.03795 | 0.17427  | -0.0772  | -0.00596 | 0.14247  | 0.23648  | 0.55158  | 0.57803  | 0.65486  | 0.77675  | 0.70297  | 0.79305  | 0.56738  | 0.3542   | 0.17409  | 0.00584  | 0.04488  | -0.15256 | -0.44371 | -0.26024 | -0.21217 | -0.28798 | -0.12533 |
| PFF1080w    | -0.6657  | -0.52774 | -0.69455 | -0.55313 | -0.56593 | -0.5298  | -0.38747 | 0.00639  | 0.27536  | 0.60881  | 0.90842  | 1.25286  | 1.30753  | 1.0268   | 0.87635  | 0.72082  | 0.14964  | 0.37368  | 0.32698  | -0.09284 | -0.21581 | 0.18755  | -0.0622  | -0.23526 |
| MAL8P1.93   | 0.32967  | 0.34338  | 0.29407  | 0.67571  | 0.91689  | 0.47023  | 0.29701  | 0.72419  | 0.43486  | 0.3069   | 0.54251  | 0.48433  | 0.56472  | 0.3593   | 0.32133  | 0.14256  | -0.37768 | 0.00609  | -0.00499 | -0.1509  | -0.07724 | -0.22346 | 0.01749  | 0.22241  |
| PFE0475w    | -0.66582 | -0.72262 | -0.71719 | -0.39671 | -0.40717 | 0.0028   | 0.16823  | 0.37286  | 0.53677  | 0.71344  | 0.80373  | 0.87196  | 0.79252  | 0.63014  | 0.39497  | 0.15279  | -0.03951 | -0.0362  | -0.22783 | -0.44017 | -0.5993  | -0.66497 | -0.71795 | -0.60476 |
| PF10_0090   | 0.4334   | 0.55676  | 0.42351  | 0.61446  | 0.62043  | 0.44552  | 0.41434  | 0.43274  | 0.45045  | 0.40596  | 0.50034  | 0.59724  | 0.25545  | 0.33384  | 0.31568  | 0.30696  | 0.19256  | 0.47134  | 0.10396  | 0.15248  | -0.08244 | -0.05752 | 0.06673  | 0.1273   |
| PFC1050w    | 0.58191  | 0.15048  | 0.2084   | -0.24205 | -0.22799 | -0.08727 | -0.15407 | -0.19157 | -0.3265  | -0.22654 | -0.40465 | -0.31179 | -0.352   | -0.57927 | -0.66982 | -0.71629 | -0.83144 | -0.34217 | 0.31861  | 0.29098  | 0.46276  | 0.67834  | 0.84605  | 0.75638  |
| PFL2040w    | -0.04635 | 0.11087  | 0.01808  | -0.02211 | -0.01457 | -0.08807 | -0.01875 | -0.07271 | 0.08953  | 0.11577  | 0.27856  | 0.35663  | 0.52767  | 0.46068  | 0.53816  | 0.46541  | 0.52165  | 0.34722  | 0.5261   | 0.16215  | 0.0833   | 0.21462  | 0.26539  | 0.38442  |
| PF14_0026   | -0.17152 | 0.03897  | 0.52729  | 0.42763  | 0.30581  | 0.62696  | 0.5085   | 0.42672  | 0.54331  | 0.3803   | 0.38536  | 0.43841  | 0.49954  | 0.44023  | 0.48741  | 0.5122   | 0.52588  | 0.47318  | 0.48766  | 0.06151  | -0.22195 | -0.23067 | -0.19686 | -0.21725 |
| PF1105w     | -1.83045 | -1.29309 | -0.68299 | -0.49142 | -0.20567 | 0.15332  | -0.13647 | -0.21984 | -0.26952 | -0.05201 | 0.60114  | 0.54849  | 0.84859  | 0.68356  | 0.47163  | 0.11131  | -0.53272 | -0.51106 | -1.33405 | -1.92138 | -2.18499 | -2.13305 | -2.04725 | -2.01236 |
| PFC0765c    | -0.73037 | -0.77001 | -1.03066 | -1.01233 | -0.3958  | -0.35049 | -0.11608 | 0.37697  | 0.64188  | 0.5211   | 0.66297  | 0.54305  | 0.72033  | 0.72329  | 0.66125  | 0.68728  | 0.76833  | 0.42789  | 0.68165  | 0.30428  | -0.14977 | -0.30697 | -0.46209 | -0.88208 |
| PFF0765c    | -0.4419  | -0.6066  | -0.79794 | -0.50021 | -0.68847 | -0.60462 | -0.36611 | -0.34421 | -0.27496 | 0.01457  | 0.09225  | 0.17417  | 0.3951   | 0.52361  | 0.43506  | 0.45252  | 0.31301  | 0.39968  | 0.2077   | 0.27426  | -0.0364  | -0.23492 | -0.39328 | -0.58944 |
| PFE1050w    | -1.8722  | -1.62243 | -1.23973 | -1.495   | -1.44433 | -1.24609 | -1.50834 | -1.61142 | -1.51401 | -0.87365 | -0.53468 | -0.25251 | 0.36873  | 0.54987  | 0.81843  | 0.71552  | 0.40181  | 0.22116  | -0.19623 | -0.86229 | -1.22732 | -1.6897  | -2.05283 | -2.23841 |
| PF08_0141   | 0.75494  | 0.95475  | 0.21795  | 0.8936   | 0.14504  | 0.0723   | 0.08439  | 0.56507  | 0.57645  | 0.50543  | 0.42474  | 0.51821  | -0.07218 | 0.13596  | 0.23947  | 0.3404   | 0.18958  | 0.09498  | 0.62832  | 0.03146  | 0.32338  | 0.23086  | -0.18188 | -0.17498 |
| MAL13P1.336 | -0.44908 | -0.23162 | 0.07129  | 0.19094  | -0.05357 | 0.0713   | 0.08825  | -0.03686 | 0.10143  | 0.10508  | 0.12624  | 0.3327   | 0.44021  | 0.5061   | 0.55119  | 0.36799  | 0.20257  | 0.24315  | -0.44918 | -0.46253 | -0.56707 | -0.47006 | -0.43309 | -0.56683 |
| PFL0535c    | -0.50383 | -0.80314 | -0.76714 | -0.94173 | -1.06661 | -1.00206 | -1.21363 | -1.19559 | -1.00973 | -0.40167 | -0.09917 | 0.25863  | 0.52313  | 0.59073  | 0.83294  | 0.81746  | 0.51248  | 0.64645  | 0.57587  | 0.29349  | -0.11798 | -0.40125 | -0.50009 | -0.51317 |
| PFF1230c    | 1.00008  | 0.83653  | 0.79096  | 0.89112  | 1.09859  | 1.24819  | 1.08669  | 0.89177  | 0.42086  | -0.30395 | -0.74064 | -1.50014 | -2.23106 | -2.78382 | -2.86568 | -3.40024 | -2.55715 | -1.96581 | 0.41592  | 0.40228  | 0.51435  | 0.46387  | 0.68719  | 1.03469  |
| PF11_0393   | 1.08164  | 1.25373  | 0.8883   | 1.10429  | 1.05672  | 1.03634  | 0.78761  | 0.80988  | 0.53703  | 0.34373  | 0.38204  | 0.3088   | 0.1414   | 0.10901  | 0.04015  | -0.03517 | -0.21112 | -0.45979 | -0.22235 | -0.59241 | -0.07051 | 0.01766  | 0.14318  | 0.58273  |
| PFF1470c    | -0.72456 | -0.8937  | -0.89688 | -1.07674 | -0.94675 | -1.05372 | -1.00056 | -0.96316 | -0.43153 | 0.08184  | 0.30714  | 0.49719  | 0.58904  | 0.86677  | 0.67492  | 0.52109  | 0.28927  | -0.02362 | -0.10355 | -0.21049 | -0.50323 | -0.73994 | -0.56651 |          |
| mal_mito_3  | -0.6709  | -0.82667 | -1.15135 | -1.56998 | -1.53807 | -1.55383 | -1.64404 | -0.97851 | -1.58643 | -1.50735 | -1.05587 | -0.71536 | -0.36883 | -0.03259 | 0.40476  | 0.91296  | 0.65188  | 1.23345  | 0.71575  | 0.07629  | 0.03493  | 0.51101  | -0.64113 | -0.82607 |
| PF10_0332   | 0.21531  | 0.26415  | 0.00531  | 0.35827  | 0.32571  | 0.3471   | 0.38536  | 0.31794  | 0.26403  | 0.2362   | 0.14977  | 0.1929   | 0.05991  | 0.27337  | 0.51763  | 0.6707   | 0.41597  | 0.46061  | 0.58245  | 0.37293  | 0.22189  | 0.01014  | -0.15506 | -0.13868 |
| PFF0375c    | -0.9841  | -1.11958 | -1.07403 | -1.4626  | -1.73468 | -1.84423 | -1.77957 | -1.94457 | -1.83651 | -1.55218 | -1.30556 | -1.06155 | -0.35205 | 0.25635  | 0.86606  | 0.95899  | 1.01951  | 0.69471  | 0.27361  | 0.42373  | 0.10955  | -0.18377 | -0.58458 | -0.98327 |
| PF13_0077   | -0.59221 | -0.52119 | -0.71883 | -0.63465 | -0.5677  | -0.3005  | -0.13853 | 0.0537   | 0.28122  | 0.27692  | 0.51519  | 0.46313  | 0.39373  | 0.31558  | 0.06183  | -0.03858 | 0.21062  | 0.03228  | -0.13926 | 0.12921  | 0.2298   | -0.23149 | -0.05373 | -0.3384  |
| PF13_0071   | -1.36482 | -1.44891 | -1.42305 | -1.32847 | -1.16289 | -1.05161 | -0.45176 | 0.20891  | 0.92052  | 1.41142  | 1.37856  | 1.46899  | 1.11241  | 0.79629  | 0.39419  | -0.11567 | -0.45809 | -0.7318  | -1.00739 | -1.14041 | -1.26206 | -1.47216 | -1.36406 | -1.08717 |
| PF08_0136   | 0.82106  | 0.80489  | 0.59273  | 0.83247  | 1.13107  | 1.19356  | 0.98943  | 1.29867  | 0.80752  | 0.44261  | 0.45219  | 0.01028  | -0.14529 | -0.15692 | -0.25661 | -0.21708 | -0.2942  | -0.2594  | 0.54106  | 0.20814  | 0.65915  | 0.4911   | 0.76711  | 0.6503   |
| PF08_0018   | 0.00906  | -0.00229 | 0.20679  | 0.14853  | 0.16704  | 0.60872  | 0.52562  | 0.42557  | 0.56034  | 0.59477  | 0.49959  | 0.46267  | 0.42152  | 0.45371  | 0.21616  | 0.24122  | 0.21628  | 0.02738  | 0.13923  | 0.13634  | 0.06154  | 0.26949  | 0.14545  |          |
| MAL7P1.11   | -0.64776 | -0.33522 | 0.35315  | 0.00662  | 0.04504  | 0.27635  | -0.5509  | 0.80977  | 0.38972  | 0.86105  | 0.82173  | 0.83127  | 0.37584  | -0.04967 | 0.2095   | 0.08506  | -0.31041 | -0.1483  | 0.30276  | -0.29246 | -0.54569 | -0.36681 | -0.30529 | -0.33869 |
| PFE1390w    | 0.42488  | 0.72879  | 0.98387  | 0.49408  | 0.83954  | 0.90546  | 0.54656  | 0.77181  | 0.64847  | 0.50523  | 0.71408  | 0.60561  | 0.58966  | 0.27613  | 0.14472  | -0.05992 | -0.3718  | -0.44433 | -0.36153 | -0.6501  | -0.46486 | -0.19005 | 0.07385  | 0.24825  |
| PF14_0112   | -1.07473 | -1.17058 | -1.17159 | -1.26007 | -1.15751 | -1.12441 | -1.15989 | -1.21718 | -0.50691 | -0.01714 | 0.27913  | 0.50823  | 0.8794   | 1.05616  | 0.65328  | 0.377    | 0.6295   | 0.02565  | -0.85091 | -0.40995 | -0.84916 | -0.83138 | -0.93106 | -0.94767 |
| MAL13P1.322 | 0.92766  | 0.98055  | 0.80555  | 1.14697  | 0.91333  | 0.96921  | 0.84184  | 0.95287  | 0.8051   | 0.65466  | 0.59375  | 0.37338  | 0.33172  | 0.10053  | 0.03771  | 0.04986  | 0.06189  | -0.27159 | 0.25612  | 0.12636  | 0.10256  | 0.35818  | 0.59571  | 0.51014  |
| PFL0200c    | -0.09097 | 0.23222  | 0.07719  | 0.16193  | 0.29966  | 0.04479  | -0.04561 | 0.16384  | 0.37692  | 0.61317  | 0.64007  | 0.63785  | 0.7523   | 0.6973   | 0.50543  | 0.21706  | 0.14416  | -0.15281 | -0.36413 | -0.25563 | -0.06417 | -0.08408 | -0.06386 | 0.09221  |
| PFE1015c    | -0.45032 | -0.22941 | 0.05723  | 0.01409  | 0.18965  | 0.49847  | 0.55535  | 0.69034  | 0.75477  | 0.80682  | 0.64934  | 0.67971  | 0.72867  | 0.52957  | 0.40415  | 0.21068  | 0.15506  | -0.32937 | -0.05803 | -0.44784 | -0.31657 | -0.6103  | -0.5017  | -0.41556 |
| PF13_0107   | 0.52544  | 0.82876  | 1.20028  | 1.17708  | 1.02523  | 1.04186  | 1.04813  | 0.68788  | 0.60462  | 0.54488  | 0.42272  | 0.53514  | 0.42292  | 0.18838  | 0.04582  | -0.0792  | 0.49953  | 0.04465  | -0.0448  | 0.18034  | 0.40265  | 0.4287   | 0.6647   | 0.71124  |
| PF14_0300   | -1.1796  | -1.03744 | -0.98181 | -0.89729 | -0.90861 | -0.69148 | -0.36799 | -0.1259  | -0.07858 | 0.21058  | 0.45016  | 0.7155   | 0.72787  | 0.669    | 0.82003  | 0.6814   | 0.19653  | 0.23183  | 7.39E-05 | -0.23688 | -0.7456  | -0.87772 | -0.93512 | -0.89705 |
| PF08_0122   | 0.75385  | 1.06145  | 1.10283  | 1.46626  | 1.44213  | 1.38565  | 1.09782  | 0.84265  | 0.36896  | 0.13481  | -0.15637 | -0.22193 | -0.0245  | 0.09267  | -0.0009  | -0.15389 | 0.01295  | -0.02712 | -0.30648 | 0.10712  | 0.54617  | 0.96753  | 1.13497  | 1.18579  |
| MAL8P1.139  | -0.84149 | -0.88545 | -0.52393 | -0.91066 | -0.86007 | -0.6844  | -0.55433 | -0.76327 | -0.20891 | -0.00854 | -0.1148  | 0.04644  | 0.21012  | 0.56865  | 0.40116  | 0.39344  | 0.56712  | 0.38783  | -0.40903 | -0.0008  | -0.06989 | -0.26798 | -0.55042 | -0.73202 |
| MAL13P1.122 | 1.4131   | 1.48805  | 1.03977  | 1.15683  | 1.02339  | 0.7978   | 0.67017  | 0.4267   | 0.48839  | 0.52149  | 0.34076  | 0.08506  | 0.07691  | -0.00306 | -0.4554  | -0.83349 | -0.85146 | -0.95599 | -1.26621 | -0.23837 | 0.38651  | 0.81741  | 0.9396   | 1.01977  |
| PFL2105c    | 0.7381   | 0.7182   | 0.95188  | 0.84405  | 0.7247   | 0.77332  | 0.74945  | 0.7048   | 0.51391  | 0.36833  | 0.4737   | 0.29176  | 0.18911  | -0.13613 | -0.15386 | -0.26815 | -0.50313 | -0.27752 | 0.1687   | -0.0586  | -0.07701 | -0.09354 | 0.19353  | 0.40995  |
| MAL13P1.241 | 0.39881  | -0.00052 | -0.1803  | -0.23519 | -0.44969 | -0.47771 | -0.65663 | -0.73349 | -1.17342 | -0.98378 | -0.61024 | -0.47037 | -0.29127 | -0.17461 | 0.1721   | 0.60272  | 0.34801  | 0.80966  | 1.17713  | 0.89003  | 0.69891  | 0.225    |          |          |

|             |          |          |          |          |          |          |          |          |          |          |          |          |          |          |          |          |          |          |          |          |          |          |          |          |
|-------------|----------|----------|----------|----------|----------|----------|----------|----------|----------|----------|----------|----------|----------|----------|----------|----------|----------|----------|----------|----------|----------|----------|----------|----------|
| PF14 0469   | 0.93694  | 1.01581  | 0.66955  | 0.87361  | 0.77734  | 0.59923  | 0.2995   | 0.22128  | -0.1884  | -0.22129 | -0.18793 | -0.37983 | -0.37498 | -0.41575 | -0.19776 | -0.16023 | -0.36639 | -0.18785 | 0.03767  | -0.05108 | 0.13126  | 0.2356   | 0.41995  | 0.67651  |
| PFE1010w    | 0.34791  | 0.35306  | 0.58401  | 1.07536  | 1.08749  | 1.30296  | 1.18299  | 0.92769  | 1.03591  | 0.97235  | 0.91576  | 0.77752  | 0.58717  | 0.44382  | 0.14474  | 0.05839  | -0.17064 | -0.15074 | -0.37594 | -0.37885 | -0.57188 | -0.3835  | -0.17034 | 0.23681  |
| PFF0920c    | -0.53748 | -0.26697 | 0.00457  | -0.25639 | -0.19695 | 0.05568  | 0.12123  | 0.00574  | 0.22288  | 0.33178  | 0.29517  | 0.41499  | 0.57859  | 0.56114  | 0.38597  | 0.22077  | 0.2482   | 0.10944  | -0.55674 | -0.43144 | -0.44013 | -0.41571 | -0.72376 | -0.74223 |
| MAL13P1.201 | -0.20415 | -0.2502  | -0.07674 | 0.24477  | 0.43657  | 0.53323  | 0.48427  | 0.33994  | 0.47229  | 0.52244  | 0.62816  | 0.99207  | 0.85307  | 0.76676  | 0.58846  | 0.31448  | -0.05833 | 0.1878   | 0.08377  | 0.03631  | -0.1221  | -0.34031 | -0.19117 | -0.20236 |
| PFL1235c    | 0.21246  | 0.49492  | 0.68324  | 0.40401  | 0.51526  | 0.53893  | 0.51137  | 0.65352  | 0.65641  | 0.5276   | 0.50969  | 0.53108  | 0.49339  | 0.16849  | 0.04968  | -0.22725 | -0.35225 | -0.40321 | -0.78244 | -0.82858 | -0.59214 | -0.18562 | -0.08214 | 0.05     |
| PF10 0167   | -0.01007 | -0.44389 | -0.3723  | -0.42032 | -0.84742 | -0.86331 | -0.98854 | -0.95654 | -0.76048 | -0.18771 | 0.20635  | 0.55975  | 0.46713  | 0.41484  | 0.46838  | 0.37205  | 0.08147  | 0.53863  | 0.65056  | 0.51649  | 0.33524  | 0.03512  | -0.02464 | -0.25089 |
| MAL8P1.18   | -0.67097 | -0.84972 | -0.83084 | -0.84131 | -0.78038 | -0.52884 | -0.40323 | -0.26302 | 0.0755   | 0.36395  | 0.27018  | 0.55229  | 0.80873  | 0.99447  | 0.75574  | 0.64601  | 0.44271  | 0.60075  | 0.06827  | 0.09701  | -0.2926  | -0.36522 | -0.61356 | -0.78517 |
| PF11660w    | -0.4442  | -0.68313 | -1.82189 | -0.41858 | -0.95226 | -0.96294 | -1.08443 | -0.86281 | -0.78486 | -0.71119 | -0.32218 | -0.1496  | 0.0625   | -0.02738 | 0.6061   | 0.5088   | 0.45918  | 0.35827  | 0.96677  | 0.2935   | -0.02648 | -0.13754 | -0.25088 | -0.48393 |
| PFI0770c    | 0.12348  | 0.23753  | -0.21573 | 0.02115  | -0.14361 | -0.08909 | -0.16448 | -0.19702 | -0.50187 | -0.61577 | -0.43043 | -0.15232 | -0.21297 | -0.05483 | 0.39941  | 0.5614   | 0.60573  | 0.43785  | 0.82985  | 0.44659  | 0.35196  | 0.39267  | 0.3259   | 0.23488  |
| PFL1825w    | -1.39316 | -1.43036 | -1.15461 | -1.50509 | -1.64781 | -1.49092 | -1.16972 | -0.90869 | -1.34173 | -0.65964 | -0.37925 | -0.20727 | 0.02805  | 0.26443  | 0.53313  | 0.47134  | 0.49259  | 0.39819  | 0.25389  | 0.22467  | -0.47823 | -1.00924 | -1.02704 | -1.23465 |
| PF11035w    | 0.24643  | 0.13866  | 0.72126  | 0.44823  | 0.74768  | 1.22223  | 1.45534  | 1.46465  | 1.51553  | 1.35066  | 1.28615  | 1.0929   | 0.80397  | 0.4542   | 0.2278   | 0.00741  | -0.51119 | -0.48917 | -0.32492 | -0.31314 | -0.10201 | -0.09509 | -0.09294 | 0.25841  |
| PF14 0733   | 1.44265  | 1.09738  | 0.56131  | 0.83608  | 0.60767  | 0.2335   | -0.29786 | -0.31087 | -0.38239 | -0.68953 | -1.1309  | -1.15556 | -1.78014 | -2.35618 | -2.74565 | -3.10369 | -3.02167 | -2.62381 | -0.43357 | 0.6149   | 0.79842  | 0.61225  | 1.32103  | 1.421    |
| PFF0795w    | 0.3137   | 0.39184  | 0.34312  | 0.31774  | 0.42708  | 0.34305  | 0.42384  | 0.543    | 0.62663  | 0.75713  | 0.7718   | 1.01679  | 0.53621  | 0.51135  | 0.11071  | 0.05783  | -0.19188 | 0.323    | -0.27952 | -0.11443 | -0.32717 | -0.18863 | -0.21121 | -0.13957 |
| MAL8P1.123  | -0.75617 | -0.6532  | -0.19681 | -0.44188 | -0.19394 | -0.08176 | 0.08136  | 0.19596  | 0.17859  | 0.241    | 0.29818  | 0.3586   | 0.42692  | 0.66951  | 0.66435  | 0.54318  | 0.46746  | 0.24603  | 0.04761  | -0.06909 | -0.29664 | -0.55139 | -0.75373 | -0.69707 |
| PFF1020c    | 0.26046  | -0.24974 | -0.62672 | -0.73229 | -0.87276 | -1.11879 | -1.34045 | -1.47324 | -1.90073 | -2.12984 | -2.15669 | -2.17967 | -2.05762 | -1.77146 | -0.74868 | 0.35923  | 0.70591  | 0.86882  | 1.30439  | 0.91751  | 1.12432  | 0.88165  | 0.59441  | 0.10684  |
| MAL13P1.54  | -0.41775 | 0.02507  | 0.57305  | 0.73906  | 0.58081  | 0.66707  | 0.6081   | 0.77106  | 0.74402  | 0.76507  | 0.64855  | 0.52261  | 0.5397   | 0.2213   | 0.41042  | 0.27991  | 0.24048  | -0.08109 | 0.06725  | -0.31145 | -0.33448 | -0.32566 | -0.33962 | -0.30223 |
| PF07 0011   | 0.00173  | 0.56548  | 0.54743  | 0.84829  | 0.98574  | 1.16268  | 1.05809  | 1.34116  | 1.0243   | 0.88688  | 1.02094  | 0.72125  | 0.76248  | 0.42735  | 0.3993   | 0.21761  | -0.40132 | -0.19423 | -0.31909 | -0.41967 | -0.56263 | -0.62002 | -0.43167 | -0.12302 |
| PFD0365c    | -1.18088 | -0.55828 | -2.59544 | -0.24639 | -0.15943 | 0.03188  | 0.19749  | 0.68646  | 0.5695   | 0.60913  | 1.12623  | 1.11253  | 0.95054  | 0.37976  | 0.51245  | 0.33122  | 0.01612  | -0.12629 | -0.38054 | -0.73269 | -0.84913 | -0.6349  | -0.48513 | -0.5577  |
| PFB0895c    | -0.80386 | -0.90484 | -1.0326  | -0.96016 | -1.00118 | -1.34507 | -1.18003 | -0.97954 | -0.39188 | 0.11686  | 0.424    | 0.78507  | 0.85777  | 0.82545  | 0.75106  | 0.54966  | 0.37049  | 0.34041  | 0.06204  | -0.15777 | -0.36099 | -0.53388 | -0.67204 | -0.78866 |
| PF14 0329   | -1.63212 | -1.6845  | -1.74358 | -1.59051 | -1.27747 | -0.9732  | -0.42043 | 0.53582  | 0.97448  | 1.16297  | 1.44147  | 1.45648  | 1.17307  | 0.53666  | 0.42907  | 0.02727  | -0.9436  | -0.65773 | -0.67635 | -1.18292 | -1.35812 | -1.35855 | -1.36591 | -1.16542 |
| PFA0480w    | 0.29284  | 0.55028  | 0.47999  | 0.71866  | 0.77353  | 0.73317  | 0.70343  | 0.81236  | 0.77066  | 0.65121  | 0.67511  | 0.60345  | 0.49934  | 0.25167  | 0.23325  | 0.02634  | -0.51585 | -0.30468 | -0.47734 | -0.77218 | -0.64755 | -0.19607 | -0.1066  | 0.04548  |
| PF11 0291   | 0.40642  | 0.41643  | 0.57691  | 0.49989  | 0.31792  | 0.23373  | 0.23257  | 0.1499   | -0.03134 | -0.04657 | 0.06871  | 0.10261  | 0.09503  | 0.12217  | 0.04932  | -0.08671 | -0.24906 | -0.35217 | 0.0043   | -0.13648 | -0.01673 | 0.24062  | 0.29971  | 0.3866   |
| PF08 0092   | 0.97459  | 1.41822  | 1.14544  | 1.44781  | 1.30425  | 1.18392  | 0.94819  | 1.12312  | 1.19555  | 1.22035  | 0.98304  | 0.97466  | 0.29071  | 0.11625  | -0.09254 | -0.53567 | -0.68126 | -0.91066 | -1.1822  | -0.92664 | -0.53726 | -0.0555  | 0.20577  | 0.45348  |
| PF13 0327   | -0.19348 | -0.37148 | -0.5449  | -0.50216 | -0.57378 | -0.66358 | -0.77933 | -0.91071 | -1.20706 | -0.97839 | -0.58788 | -0.33855 | -0.1793  | -0.13955 | 0.35382  | 0.51902  | 0.34335  | 0.52005  | 1.01384  | 0.64267  | 0.45714  | 0.19823  | 0.20954  | 0.00218  |
| PF14 0354a  | -0.02203 | 0.28947  | 0.52335  | 0.47299  | 0.56211  | 0.80476  | 1.05147  | 1.07453  | 1.32059  | 1.18693  | 1.09069  | 1.06906  | 0.81312  | 0.57629  | 0.1678   | -0.07586 | -0.11396 | -0.3971  | -0.51255 | -0.34952 | -0.25879 | -0.16469 | -0.13948 | 0.36423  |
| PF13 0293   | 1.00546  | 1.06089  | 1.07862  | 1.35068  | 1.3308   | 1.32963  | 1.06989  | 1.10478  | 0.6655   | 0.71107  | 0.66598  | 0.53949  | 0.23342  | -0.03333 | -0.09339 | -0.40419 | -0.80497 | -0.85919 | -0.32464 | -0.60109 | -0.32434 | 0.12334  | 0.53724  | 0.79024  |
| PFD0850c    | -0.71291 | -1.11335 | -0.96195 | -1.12372 | -0.78388 | -0.77562 | -0.56494 | -0.28587 | 0.03879  | -0.25154 | 0.29736  | 0.37014  | 0.38215  | 0.42592  | 0.12336  | 0.28685  | 0.09331  | 0.10759  | 0.3306   | 0.2477   | -0.05337 | -0.6272  | -0.40067 | -0.67577 |
| MAL13P1.131 | -0.24336 | -0.47979 | -0.61328 | -0.73638 | -0.92611 | -1.00267 | -0.92825 | -0.89625 | -0.86493 | -0.49785 | -0.00072 | 0.28874  | 0.49042  | 0.42626  | 0.65155  | 0.83841  | 0.44691  | 0.66295  | 0.73356  | 0.42362  | 0.28634  | -0.11076 | -0.24993 | -0.51126 |
| PF11 0076   | -0.28215 | -0.05448 | 0.43928  | 0.34742  | 0.4042   | 0.6277   | 0.85198  | 0.77015  | 1.06736  | 1.08232  | 0.90621  | 0.89227  | 0.84898  | 0.81887  | 0.33079  | 0.00357  | 0.00161  | -0.12362 | -0.87386 | -0.62319 | -0.88138 | -0.55559 | -0.5424  | -0.40418 |
| PF08 0096   | -0.41895 | -0.32697 | 0.13466  | 0.21642  | 0.17136  | 0.29961  | 0.30187  | 0.39355  | 0.71248  | 0.97244  | 1.00604  | 1.05531  | 0.96575  | 0.65661  | 0.19477  | -0.3271  | -0.68909 | -1.07686 | -1.62742 | -1.36512 | -1.20932 | -0.77452 | -0.52383 | -0.51356 |
| PFF0945c    | -0.99735 | -0.41761 | 0.14364  | 0.53997  | 0.66728  | 0.77864  | 0.7507   | 0.78242  | 0.87381  | 0.89432  | 0.94214  | 0.84832  | 0.83586  | 0.70603  | 0.44427  | 0.18043  | -0.03575 | -0.29929 | -0.49909 | -0.83136 | -1.06552 | -1.26815 | -1.43708 | -1.22941 |
| PFD1090c    | -0.17439 | 0.31674  | 0.30878  | 0.10182  | 0.24101  | 0.10724  | 0.00501  | -0.08965 | -0.50573 | -0.46384 | -0.06425 | -0.00794 | 0.23589  | 0.11971  | 0.49074  | 0.32906  | 0.08496  | -0.11963 | -0.06445 | -0.37271 | -0.58479 | -0.58324 | -0.5756  | -0.20492 |
| PF07 0120   | -1.02823 | -0.97764 | -0.79045 | -1.09582 | -0.94495 | -0.79756 | -0.69231 | -0.81031 | -0.94299 | -0.20409 | -0.08715 | 0.17744  | 0.57695  | 0.80641  | 0.67632  | 0.50302  | 0.34846  | 0.34219  | -0.39707 | -0.1139  | -0.11641 | -0.11076 | -0.39985 | -0.53861 |
| PF10 0089   | 0.83517  | 1.07877  | 1.01009  | 1.40899  | 1.212    | 1.29785  | 1.02828  | 1.0866   | 1.07865  | 0.84114  | 0.70204  | 0.44668  | 0.34343  | 0.18301  | 0.01616  | -0.19938 | -0.48415 | -0.51518 | -0.54014 | -0.60075 | -0.33861 | 0.0936   | 0.26393  | 0.61067  |
| PFB0405w    | 0.77058  | 0.92458  | 0.882    | 0.9799   | 1.27979  | 1.27522  | 1.27226  | 1.24071  | 0.9049   | 0.48374  | 0.34259  | 0.11678  | 0.07279  | 0.0421   | -0.24297 | -0.21673 | -0.09328 | -0.06445 | -0.16471 | 0.30708  | 0.39773  | 0.8484   | 0.88287  | 0.87711  |
| PFB0732c    | 0.04055  | 0.02012  | 0.11312  | 0.17446  | 0.37126  | 0.28272  | 0.34151  | 0.50192  | 0.4301   | 0.6514   | 0.60423  | 0.75143  | 0.47101  | 0.4322   | 0.16572  | -0.03388 | -0.04043 | 0.14317  | -0.53592 | -0.04934 | -0.31566 | -0.36722 | -0.32059 | -0.28431 |
| PF10 0046   | 0.16792  | 0.31929  | 0.54164  | 0.59504  | 0.57543  | 0.45137  | 0.27792  | -0.05142 | -0.20177 | -0.04005 | -0.24404 | -0.09862 | 0.09802  | 0.10864  | -0.03023 | -0.06178 | -0.21317 | -0.31606 | -0.41649 | -0.24445 | -0.01919 | 0.27038  | 0.32323  | 0.34964  |
| PF14 0393   | -0.99984 | -0.7342  | -0.53481 | -0.38741 | -0.28687 | -0.22005 | -0.09503 | 0.11591  | 0.33643  | 0.55304  | 0.70596  | 0.9469   | 0.82472  | 0.63813  | 0.58187  | 0.44445  | -0.17295 | -0.31237 | -0.26113 | -0.71428 | -0.77165 | -0.8121  | -0.79655 | -0.67027 |
| PF11 0146   | -0.64417 | -0.79028 | -0.54048 | -0.79909 | -0.85368 | -0.5987  | -0.51244 | -0.87778 | -0.57911 | -0.29294 | -0.29478 | 0.04929  | 0.26016  | 0.55645  | 0.6577   | 0.75115  | 0.80719  | 0.50836  | 0.52077  | 0.27116  | 0.04341  | -0.04017 | -0.37739 | -0.78606 |
| PFL0480w    | 1.27315  | 0.94618  | 0.26702  | 0.47434  | 0.42822  | 0.01227  | -0.13281 | -0.21947 | -0.29417 | -0.37473 | -0.34987 | -0.17139 | -0.22646 | -0.53947 | -0.51599 | -0.41733 | -0.12032 | 0.53662  | 1.00671  | 0.7918   | 1.53999  | 1.09351  | 1.02562  | 0.86249  |
| PF10 0193   | 0.43147  | -0.38908 | -1.01589 | -1.03503 | -1.50388 | -1.64897 | -1.65061 | -1.35466 | -1.07108 | -1.25611 | -0.98461 | -1.16782 | -1.52371 | -1.8122  | -1.67767 | -0.8044  | -0.23462 | 0.08411  | 1.6      |          |          |          |          |          |

|             |          |          |          |          |          |          |          |          |          |          |          |          |          |          |          |          |          |          |          |          |          |          |          |          |
|-------------|----------|----------|----------|----------|----------|----------|----------|----------|----------|----------|----------|----------|----------|----------|----------|----------|----------|----------|----------|----------|----------|----------|----------|----------|
| PF10 0206   | -0.41705 | -0.63024 | -0.59854 | -0.53553 | -0.60903 | -0.64307 | -0.69824 | -0.74944 | -0.49982 | -0.1701  | 0.08142  | 0.55682  | 0.62905  | 0.70388  | 0.76842  | 0.75675  | 0.81232  | 0.57876  | 0.40989  | 0.23739  | 0.13161  | -0.12826 | -0.14431 | -0.34366 |
| MAL8P1.3    | -0.5421  | -0.15967 | 0.39074  | 0.02939  | 0.33627  | 0.7063   | 0.99689  | 1.39312  | 1.63871  | 1.74778  | 1.60001  | 1.47583  | 0.80431  | -0.20245 | -0.57088 | -1.01768 | -1.53903 | -1.89123 | -1.79041 | -2.09547 | -1.82655 | -1.49567 | -1.21782 | -0.73629 |
| PF07 0068   | -0.81532 | -0.83667 | -0.85765 | -0.58779 | -0.34616 | 0.02775  | 0.31734  | 0.40523  | 0.61669  | 0.85368  | 0.77192  | 0.92482  | 0.75255  | 0.57686  | 0.43319  | 0.33264  | 0.18719  | 0.0531   | -0.07844 | -0.19932 | -0.42298 | -0.31387 | -0.28961 | -0.26178 |
| PF08 0037   | -0.00216 | 0.22928  | 0.47224  | 0.50613  | 0.38365  | 0.50483  | 0.48674  | 0.53043  | 0.66972  | 0.71024  | 0.7803   | 0.74185  | 0.48016  | 0.21619  | 0.12988  | -0.23898 | -0.41898 | -0.52551 | -0.8237  | -0.80187 | -0.58665 | -0.37905 | -0.10253 | 0.1734   |
| PF14 0061   | -0.75647 | -1.08291 | -1.23739 | -1.29856 | -1.37484 | -1.51617 | -1.25591 | -0.70864 | -0.05108 | 0.31027  | 0.50173  | 0.63693  | 0.67815  | 0.57878  | 0.57176  | 0.54502  | 0.58548  | 0.2128   | 0.45918  | 0.12873  | -0.38503 | -0.60696 | -0.77626 | -0.97813 |
| MAL13P1.103 | -0.92757 | -1.10243 | -1.07161 | -1.56024 | -1.44083 | -1.81505 | -1.74996 | -1.60826 | -1.14805 | -0.81265 | -0.49173 | -0.04585 | 0.26544  | 0.67056  | 0.83454  | 0.78704  | 0.66612  | 0.67794  | -0.14967 | 0.0323   | -0.17897 | -0.50763 | -0.71937 | -0.82318 |
| PF13 0309   | 0.62652  | 1.05673  | 0.9641   | 1.44708  | 1.4858   | 1.36885  | 1.39867  | 1.35652  | 1.16189  | 1.05328  | 0.87863  | 0.67152  | 0.35795  | 0.12158  | 0.32525  | -0.63454 | -0.85563 | -1.06155 | -1.35377 | -1.08964 | -0.71143 | -0.33346 | -0.05058 | 0.34815  |
| PF14 0675   | -0.63264 | -0.75637 | -0.81281 | -0.83175 | -0.86307 | -0.63657 | -0.59596 | -0.41605 | -0.25243 | -0.23806 | -0.22999 | -0.02285 | 0.28281  | 0.61207  | 0.70298  | 0.79461  | 0.38181  | 0.63528  | 0.33335  | 0.26642  | -0.01928 | -0.21571 | -0.47911 | -0.57681 |
| PF08 0109   | -0.44041 | -0.33779 | -0.22501 | -0.22265 | -0.31856 | -0.24214 | -0.34365 | -0.1859  | -0.06042 | -0.14949 | 0.04629  | 0.08523  | 0.2549   | 0.16936  | 0.36269  | 0.44962  | 0.36854  | 0.37314  | 0.47686  | 0.18729  | -0.05296 | -0.28446 | -0.1968  | -0.33514 |
| PF14 0608   | 0.6529   | 0.57468  | -0.64    | 0.56975  | 0.54428  | 0.61385  | 0.45663  | 0.50346  | 1.05168  | 0.69302  | 0.23735  | 0.20495  | 0.05256  | 0.00278  | -0.20624 | 0.03062  | -0.27993 | -0.43794 | -0.3277  | -0.13334 | 0.10185  | 0.29053  | 0.49512  |          |
| PF14 0444   | -0.19128 | -0.46508 | -0.43251 | -0.57152 | -0.59303 | -0.3555  | -0.33144 | -0.08668 | -0.06672 | 0.01942  | 0.07248  | 0.19154  | 0.12268  | 0.19313  | 0.35117  | 0.42852  | 0.36971  | 0.31297  | 0.84606  | 0.47208  | 0.37187  | 0.02234  | 0.12675  | -0.27105 |
| PFC0500w    | -0.43961 | -0.34466 | -0.49214 | -0.42142 | -0.59261 | -0.5687  | -0.61938 | -0.70986 | -0.34939 | -0.39336 | -0.25236 | 0.04421  | 0.30211  | 0.36121  | 0.67118  | 0.73941  | 0.43591  | 0.60143  | 0.50398  | 0.27785  | 0.20954  | 0.04547  | -0.10859 | -0.14742 |
| PF13 0205   | 0.23961  | 0.27265  | -0.29684 | -0.18502 | -0.0556  | -0.02471 | 0        | 0.03464  | -0.46475 | -0.41557 | -0.03492 | -0.04874 | -0.06395 | 0.14472  | 0.63081  | 0.73923  | 0.45957  | 0.44159  | 0.56283  | 0.15807  | 0.32452  | 0.138    | -0.31541 | -0.11422 |
| PFE1245w    | -1.44629 | -1.44649 | -1.25147 | -0.98031 | -0.64326 | -0.04358 | 1.1767   | 1.74704  | 2.04913  | 1.70506  | 1.29811  | 0.99385  | 0.34829  | -0.00145 | -0.48886 | -0.54057 | -0.84772 | -0.79098 | -1.07387 | -0.99015 | -0.86781 | -0.75496 | -0.72735 | -0.61864 |
| PFE0875c    | 0.64081  | 0.72641  | -1.32271 | 1.19855  | 1.42488  | 1.37581  | 1.23105  | 1.3119   | 0.83474  | 0.52002  | 0.53239  | 0.33005  | 0.29263  | 0.13695  | -0.05106 | -0.10543 | -0.13879 | -0.10699 | 0.154    | 0.17631  | 0.36682  | 0.56034  | 0.87375  | 1.0715   |
| PF11 0440   | -0.29473 | -0.1483  | 0.32832  | 0.12065  | 0.16844  | 0.12518  | 0.12421  | -0.15259 | -0.05692 | -0.1033  | 0.04425  | 0.33047  | 0.5031   | 0.39857  | 0.64593  | 0.66573  | 0.39744  | 0.2965   | 0.55158  | 0.20212  | 0.06096  | -0.11473 | -0.09607 | -0.13953 |
| PDF1085w    | -0.23999 | -0.1558  | -0.14857 | -0.54787 | -0.64652 | -0.74752 | -0.80042 | -1.0421  | -0.60517 | -0.02049 | 0.22013  | 0.5004   | 0.49633  | 0.42975  | 0.65543  | 0.62885  | 0.54447  | 0.46241  | 0.6804   | 0.46952  | 0.23284  | -0.22293 | -0.26218 | -0.15801 |
| PF14 0696   | -0.5062  | -0.44491 | -0.67224 | -0.42997 | -0.58176 | -0.5822  | -0.63278 | -0.78519 | -0.95329 | -0.80703 | -0.3172  | 0.28513  | 0.66965  | 0.5684   | 0.76674  | 0.77277  | 0.38914  | 0.40105  | 0.48806  | -0.13089 | -0.09457 | -0.11061 | -0.08431 | -0.11797 |
| FFF0660w    | 0.8204   | 0.18289  | -0.19352 | -0.34567 | 0.11704  | -0.3259  | -0.06664 | -0.94595 | -0.37202 | -0.70349 | -0.54309 | -0.53428 | -0.56622 | -0.35586 | -0.48894 | -0.31579 | -0.02181 | 0.39048  | 1.48413  | 1.24744  | 1.13837  | 1.17176  | 1.35282  | 1.39285  |
| MAL13P1.321 | 0.46059  | 0.65871  | 0.78852  | 0.76429  | 0.84038  | 0.71237  | 0.65608  | 0.2769   | -0.11804 | -0.34056 | -0.46347 | -0.63062 | -0.52274 | -0.32987 | 0.06231  | 0.17405  | 0.09723  | 0.11848  | 0.06747  | 0.01816  | 0.16533  | 0.19453  | 0.2227   |          |
| PF10 0062   | 0.32659  | 0.34786  | 0.22266  | 0.56365  | 0.79465  | 0.64191  | 0.41116  | 0.47181  | 0.02894  | -0.08494 | 0.29133  | 0.09372  | 0.17277  | -0.03651 | 0.00922  | -0.31659 | 0.10488  | 0.21577  | 0.15633  | 0.47256  | 0.42122  | 0.77746  | 1.01508  |          |
| PF11 0483   | -0.0592  | -0.13421 | 0.89588  | 0.64227  | 0.91193  | 1.40306  | 1.88603  | 1.87529  | 1.64326  | 1.41908  | 0.94601  | 0.92043  | 0.73412  | 0.51558  | -0.03387 | -0.18641 | -0.50905 | -0.46784 | -0.81922 | -0.65934 | -0.6868  | -0.48301 | -0.41903 | -0.12965 |
| PFB0465c    | -0.8315  | -1.31892 | -1.10155 | -1.50143 | -1.79308 | -1.33047 | -1.07921 | -0.25227 | 0.01863  | 0.36496  | 0.61924  | 0.65917  | 0.71013  | 0.84763  | 0.80629  | 0.68136  | 0.4414   | 0.43461  | 0.23284  | -0.11108 | -0.55658 | -0.73158 | -0.93346 | -0.99689 |
| PF14 0346   | 0.34183  | -0.23326 | -0.50937 | -0.67298 | -0.70209 | -0.94795 | -1.08261 | -1.42092 | -1.88401 | -2.03573 | -1.93948 | -1.97251 | -1.80532 | -1.49617 | -0.87196 | -0.12843 | 0.37782  | 0.40268  | 1.55366  | 1.08744  | 1.13053  | 0.82493  | 0.97974  | 0.9172   |
| PF11 0171   | -0.33084 | -0.24563 | 0.00649  | -0.00329 | 0.00445  | 0.18496  | 0.19759  | 0.30465  | 0.2687   | -0.03022 | 0.08371  | 0.12422  | 0.04353  | -0.14258 | -0.03885 | 0.10809  | 0.25232  | 0.16211  | 0.53856  | 0.16758  | 0.09455  | -0.05109 | 0.01884  | -0.1779  |
| PF10 0168   | 0.29319  | -0.01404 | -0.23477 | 0.00634  | -0.14644 | -0.10433 | 0.09957  | 0.25385  | 0.70705  | 0.37978  | 0.47967  | 0.27418  | 0.0736   | -0.18782 | -0.14807 | -0.1203  | 0.33728  | 0.13167  | 0.94882  | 0.56118  | 0.73438  | 0.78306  | 0.68787  | 0.67097  |
| PF14 0536   | -0.20907 | 0.30241  | 0.55763  | 0.80179  | 0.88374  | 1.01015  | 1.15577  | 1.21625  | 1.31594  | 1.24682  | 1.18378  | 1.02402  | 0.68262  | 0.32178  | 0.06651  | -0.1486  | -0.51002 | -0.50507 | -0.67165 | -0.57998 | -0.45937 | -0.2731  | -0.08179 | 0.2281   |
| PF14 0411   | -0.26087 | 0.42827  | 0.5583   | 0.64813  | 0.54955  | 0.79293  | 0.70441  | 0.75791  | 0.62549  | 0.53944  | 0.80541  | 0.85861  | 0.64934  | 0.30319  | 0.3673   | 0.04638  | -0.57259 | -0.47937 | -0.55304 | -1.10831 | -1.05067 | -0.58995 | -0.60561 | -0.2828  |
| PF13 0138   | 0.81348  | 1.18328  | 1.15205  | 1.18518  | 1.43056  | 1.2665   | 0.97157  | 0.81572  | 0.26487  | -0.1237  | -0.20265 | -0.50115 | -0.75762 | -1.09237 | -0.9689  | -1.2232  | -1.41706 | -1.33969 | -0.95127 | -0.78728 | -0.26951 | 0.10491  | 0.36771  | 0.7413   |
| PF13 0158   | 0.60346  | 0.96924  | 0.9869   | 0.81393  | 0.95315  | 0.89317  | 0.73651  | 0.75312  | 0.38834  | 0.30564  | 0.55999  | 0.36646  | 0.3059   | -0.09767 | -0.12883 | -0.26018 | -0.9062  | -0.50846 | -0.5162  | -0.77466 | -0.55106 | -0.07934 | 0.26905  | 0.50587  |
| PF10 0219   | 0.96492  | 1.16258  | 1.15469  | 1.11635  | 1.10562  | 0.98266  | 0.93349  | 0.98016  | 0.8452   | 0.63922  | 0.54556  | 0.28391  | -0.01584 | -0.36726 | -0.55619 | -0.95525 | -0.93076 | -1.26672 | -0.88841 | -0.50079 | -0.05311 | 0.30092  | 0.55573  | 0.74674  |
| PFC0430w    | 0.22551  | 0.60016  | 0.73154  | 0.57448  | 0.81399  | 0.96793  | 1.06154  | 1.00929  | 0.99958  | 0.96554  | 0.85621  | 0.65223  | 0.53842  | 0.31574  | -0.04396 | -0.39624 | -0.32061 | -0.67001 | -0.96746 | -0.92855 | -0.65464 | -0.38602 | -0.1316  | 0.12384  |
| PFC0410w    | 1.34693  | 0.97619  | 0.75981  | 0.75716  | 0.8108   | 0.87751  | 0.45686  | 0.42085  | 0.4836   | 0.25551  | 0.33365  | 0.19973  | 0.07567  | -0.23945 | -0.31804 | -0.55947 | -0.89113 | -0.35954 | 0.18003  | 0.19877  | 0.25556  | 0.49817  | 0.75226  | 1.07879  |
| PF14 0550   | 0.47218  | 0.75092  | 0.76115  | 0.90669  | 0.86918  | 0.78076  | 0.83688  | 1.01723  | 1.18834  | 1.03816  | 1.00106  | 0.76206  | 0.34576  | -0.10144 | -0.58676 | -1.09495 | -1.17046 | -1.616   | -1.21068 | -0.83427 | -0.37003 | 0.17827  | 0.33512  | 0.43013  |
| PF10 0355   | 0.83209  | 0.46131  | 0.42382  | 0.23935  | 0.01589  | -0.08374 | -0.10508 | -0.25631 | -0.13789 | -0.21277 | -0.24194 | -0.09236 | -0.16268 | -0.09047 | -0.10165 | -0.01801 | 0.25207  | 0.15952  | 0.62747  | 0.39464  | 0.42974  | 0.36844  | 0.39651  | 0.18663  |
| PF08 0056   | 0.35938  | 0.49538  | 0.53003  | 0.63595  | 0.69365  | 0.68582  | 0.01148  | -0.19919 | -0.41151 | -0.54498 | -0.52419 | -0.61582 | -0.74403 | -0.8902  | -0.85818 | -0.68408 | -0.87189 | -0.7041  | 0.42107  | 0.47692  | 0.65256  | 0.24471  | 0.75881  | 1.02066  |
| MAL13P1.296 | 0.57665  | 0.10217  | -0.41002 | -0.27889 | -0.41972 | -0.59057 | -0.83089 | -1.07775 | -1.4609  | -1.59735 | -1.75932 | -1.66635 | -1.55475 | -0.94146 | -0.2859  | 0.22958  | 0.71052  | 0.60563  | 0.89383  | 1.07538  | 1.22834  | 0.85549  | 0.76631  | 0.4551   |
| PF13 0338   | -1.0969  | -1.41296 | -1.73432 | -2.06149 | -1.96084 | -2.36224 | -2.3521  | -2.58432 | -2.84532 | -2.57384 | -2.16363 | -1.53563 | -0.38332 | 0.32632  | 0.77173  | 1.06468  | 0.95379  | 1.03629  | 0.57711  | 0.45039  | -0.12524 | -0.52024 | -0.98218 | -1.17454 |
| PFC0556c    | -0.35129 | -0.68533 | -0.59498 | -0.21617 | -0.03945 | -0.04114 | -0.00239 | 0.16505  | -0.01342 | 0.1761   | 0.49739  | 0.67168  | 0.50831  | 0.63337  | 0.45229  | 0.48878  | 0.25777  | 0.26782  | 0.0074   | 0.01478  | -0.13337 | -0.35239 | -0.24819 | -0.20109 |
| PF10 0026   | 0.65617  | 0.71881  | 0.68497  | 0.77026  | 0.5569   | 0.2887   | 0.54016  | 0.62177  | 0.80454  | 0.66845  | 0.36762  | 0.43602  | 0.36841  | 0.35184  | 0.07425  | -0.20205 | -0.17956 | -0.44958 | -0.6476  | -0.31866 | 0.14235  | 0.18052  | 0.56189  | 0.52298  |
| PF14 0056   | 0.47581  | 0.70582  | 0.52743  | 0.71115  | 0.61036  | 0.41165  | 0.59532  | 0.58779  | 0.66703  | 0.53939  | 0.31426  | 0.30764  | 0.0544   | -0.097   | -0.48988 | -0.92544 | -0.8561  | -0.9896  | -1.29227 | -0.68243 | -        |          |          |          |

|             |          |          |          |          |          |          |          |          |          |          |          |          |          |          |          |          |          |          |          |          |          |          |          |          |
|-------------|----------|----------|----------|----------|----------|----------|----------|----------|----------|----------|----------|----------|----------|----------|----------|----------|----------|----------|----------|----------|----------|----------|----------|----------|
| PFE1610w    | -0.90479 | -0.71055 | -0.52604 | -0.76325 | -0.06795 | 1.20452  | 2.09415  | 2.34083  | 2.34217  | 1.59414  | 1.61728  | 0.85863  | 0.32423  | 0.015    | 0.09676  | 0.02186  | -0.13843 | -0.19762 | -0.16851 | -0.77222 | -1.02337 | -1.15757 | -1.29785 | -1.16431 |
| PF08_0046   | -0.26982 | -0.00825 | -0.0346  | 0.17474  | 0.16826  | 0.12531  | -0.24512 | 0.08677  | 0.51206  | 0.73432  | 0.91068  | 0.95515  | 0.79206  | 0.60127  | 0.42595  | 0.21744  | 0.0397   | -0.10991 | -0.10197 | -0.22628 | -0.27159 | -0.3711  | -0.09113 | -0.06865 |
| MAL8P1.63   | -0.14809 | -0.35491 | -0.13398 | -0.05951 | 0.20924  | 0.97173  | 1.47932  | 2.07523  | 1.89568  | 1.56649  | 1.41129  | 0.93458  | 0.46564  | 0.04973  | -0.22122 | -0.39241 | -0.29998 | -0.3242  | 0.04069  | -0.17117 | 0.05544  | 0.06725  | 0.2162   | 0.3244   |
| PF14_0559   | 0.49496  | 0.83844  | 0.65608  | 0.99556  | 1.14682  | 0.72576  | 0.55419  | 0.71303  | 0.39974  | 0.52003  | 0.31172  | 0.18498  | 0.20128  | 0.11567  | 0.15726  | -0.08243 | 0.08027  | -0.36552 | -0.24263 | -0.29969 | -0.23178 | 0.04044  | 0.08429  | 0.24037  |
| PFC0900w    | -0.67914 | -0.3771  | 0.10322  | -0.01804 | -0.01319 | 0.13677  | 0.20214  | 0.60379  | 0.75183  | 0.76539  | 1.03041  | 0.86316  | 0.89888  | 0.40744  | 0.33082  | -0.11514 | -0.77607 | -0.67486 | -0.85749 | -1.2171  | -1.17418 | -0.86596 | -0.93688 | -0.71977 |
| PFL0040c    | 1.48075  | 1.57437  | 1.30194  | 1.41733  | 1.25318  | 1.25894  | 1.00053  | 1.01369  | 0.93451  | 0.58331  | 0.36362  | 0.00417  | -0.43565 | -0.66864 | -0.9054  | -1.06052 | -1.15169 | -1.08251 | -0.59426 | -0.25103 | 0.47643  | 0.81596  | 1.08379  | 1.18749  |
| PFL0170w    | -0.09654 | -0.32971 | -0.38756 | -0.46625 | -0.38797 | -0.60217 | -0.64766 | -0.57373 | -0.70969 | -0.46413 | -0.23047 | -0.10642 | 0.18438  | 0.5398   | 0.73491  | -0.77103 | 0.40396  | 0.62715  | 0.55998  | 0.37815  | -0.0413  | -0.28922 | -0.44366 | -0.51756 |
| PF0310w     | -0.61158 | -0.38159 | 0.19948  | 0.21411  | 0.07349  | -0.10633 | 0.03752  | -0.49149 | -0.14938 | -0.13373 | 0.04895  | -0.65028 | -0.52239 | -0.51532 | -0.5167  | -0.5485  | -0.3404  | -0.17727 | -0.5303  | -0.05435 | 0.11174  | 0.14796  | 0.77619  | 1.07645  |
| PF14_0642   | -0.31325 | -0.37548 | -0.22342 | -0.18496 | -0.23878 | 0.17486  | 0.2159   | -0.21758 | -0.00147 | -0.12049 | 0.09364  | 0.13269  | 0.23752  | 0.416    | 0.7244   | 0.70433  | 0.69613  | 0.41169  | 0.74     | 0.29327  | 0.09436  | -0.40971 | -0.5072  | -0.50585 |
| PF11_0486   | 0.04595  | 0.45468  | 0.8114   | 0.27902  | 0.45687  | 0.39148  | 0.38849  | 0.17224  | 0.59374  | 0.70228  | 0.27991  | 0.64938  | 0.525    | 0.538    | 0.37465  | 0.33764  | 0.00775  | 0.4113   | -0.52174 | 0.12132  | 0.10761  | 0.37254  | 0.03362  | 0.02553  |
| MAL7P1.79   | -0.39179 | -0.36067 | -0.51455 | -0.67652 | -0.67732 | -0.75822 | -0.68893 | -0.17722 | 0.19464  | 0.40698  | 0.68263  | 0.78554  | 0.67094  | 0.47418  | 0.51607  | 0.48702  | 0.34354  | 0.41307  | 0.29631  | 0.07268  | -0.06476 | -0.30445 | -0.4096  | -0.46428 |
| PF13_0286   | 0.63454  | 1.09518  | 0.94461  | 1.19994  | 1.06189  | 0.97853  | 1.03282  | 1.1051   | 1.20316  | 0.97177  | 0.72673  | 0.56103  | 0.15813  | -0.21145 | -0.67624 | -1.18823 | -1.49068 | -1.5713  | -1.72561 | -1.05672 | -0.47504 | -0.03409 | 0.10347  | 0.30467  |
| PF0830w     | -0.91221 | -1.23974 | -1.51819 | -1.5374  | -1.63036 | -1.77242 | -1.70455 | -0.99752 | -0.33158 | 0.12046  | 0.56528  | 0.875    | 0.97642  | 0.91757  | 0.94835  | 0.79448  | 0.36098  | 0.37582  | 0.27317  | -0.13163 | -0.35858 | -0.7489  | -0.94018 | -1.15185 |
| PFA0580c    | -0.22269 | 0.26464  | 0.2364   | 0.27565  | 0.39769  | 0.64395  | 0.71041  | 0.25868  | 0.52331  | 0.50978  | 0.58542  | 0.69563  | 0.71439  | 0.57761  | 0.36936  | 0.23246  | -0.0154  | 0.00222  | -0.29493 | -0.79656 | -0.88541 | -0.65216 | -0.76539 | -0.56894 |
| PF07_0063   | -0.67911 | -0.58522 | -0.27228 | -0.61259 | -0.76046 | -0.62065 | -0.84713 | -0.47584 | 0.0241   | 0.49374  | 0.64719  | 0.68731  | 0.75856  | 0.55986  | 0.57062  | 0.41678  | 0.16576  | 0.33763  | 0.34906  | -0.03201 | -0.19399 | -0.36376 | -0.22929 | 0.04402  |
| PFF0635w    | 0.43321  | 0.10503  | -0.21812 | 0.06758  | 0.1203   | 0.12943  | -0.05538 | 0.15584  | -0.09793 | -0.09657 | 0.08737  | 0.03796  | -0.36848 | -0.44716 | -0.44519 | -0.29876 | -0.88987 | -0.16421 | 0.79267  | 0.26062  | 0.26298  | 0.25799  | 0.39829  | 0.62822  |
| MAL13P1.100 | -0.2238  | -0.71167 | -0.41665 | -0.43672 | -0.19853 | -0.2495  | -0.35941 | -0.32335 | -0.39504 | -0.07582 | 0.01648  | 0.22681  | 0.37396  | 0.34558  | 0.4389   | 0.61847  | 0.39066  | 0.57963  | 0.49118  | 0.36734  | 0.05438  | -0.00625 | -0.10297 | 0.02428  |
| PF14_0095   | -0.13356 | -0.19193 | -0.12369 | -0.01647 | -0.26966 | 0.05739  | 0.36423  | 0.48246  | 0.88416  | 0.94059  | 0.99233  | 1.07877  | 0.88896  | 0.82118  | 0.7051   | 0.56568  | 0.10429  | 0.25501  | 0.10284  | -0.16076 | -0.1768  | -0.24648 | -0.15778 | -0.22388 |
| PFL1815c    | 0.03128  | 0.26878  | 0.28805  | 0.43668  | 0.41183  | 0.12656  | 0.09274  | 0.36331  | -0.04157 | 0.08156  | 0.01032  | -0.0887  | 0.07007  | 0.06806  | 0.21927  | -0.04331 | 0.15191  | -0.20437 | -0.49539 | -0.22649 | -0.09754 | 0.08229  | 0.02882  | 0.07513  |
| PF09075c    | -0.39332 | 0.4156   | 1.04438  | 0.68109  | 0.9558   | 0.96281  | 0.87595  | 0.80913  | 1.13553  | 1.06386  | 1.15101  | 1.40408  | 0.84308  | 0.46885  | 0.37653  | -0.02403 | -0.56755 | -0.35219 | -0.71464 | -1.58117 | -1.54052 | -0.99591 | -0.97621 | -0.62522 |
| PF10_0326   | 0.43897  | 0.59064  | 0.34161  | 0.63055  | 0.49561  | 0.53283  | 0.62128  | 0.56095  | 0.58114  | 0.55645  | 0.33204  | 0.50085  | 0.37543  | 0.1893   | 0.1708   | 0.06076  | 0.01176  | -0.28233 | 0.08445  | -0.23944 | -0.23437 | 0.14534  | 0.13162  | 0.21617  |
| PF14_0332   | -0.61639 | -0.86788 | -0.72332 | -1.14746 | -1.20528 | -1.33769 | -1.32006 | -0.5701  | -0.45338 | 0.17857  | 0.61659  | 1.04621  | 0.95772  | 0.7448   | 0.48689  | 0.52974  | -0.11619 | 0.2978   | 0.19511  | -0.21566 | -0.52419 | -0.80105 | -0.84672 | -0.80702 |
| PFE1410c    | 1.07351  | 0.48576  | 0.007    | -0.15048 | -0.32293 | -0.83273 | -1.08779 | -1.27219 | -1.58053 | -2.23113 | -2.25941 | -2.098   | -2.49192 | -2.41808 | -1.91237 | -0.97409 | -0.15475 | 0.61263  | 1.37689  | 1.37701  | 1.31705  | 1.10792  | 1.21859  | 1.05947  |
| PF11_0338   | -0.59529 | -1.37669 | -1.45959 | -2.38266 | -2.52459 | -2.53155 | -2.42399 | -2.24567 | -2.3843  | -1.98733 | -1.53776 | -1.66633 | -1.11436 | -0.83936 | -0.43145 | 0.29677  | 0.77074  | 0.91091  | 0.62129  | 0.72272  | 0.63725  | 0.06769  | -0.26952 | -0.93712 |
| PF14_0632   | -0.60341 | -0.62106 | -0.27391 | -0.32231 | -0.43047 | -0.26477 | -0.31319 | -0.82324 | -0.19474 | -0.10254 | 0.04311  | 0.26266  | 0.30345  | 0.2828   | 0.54792  | 0.52618  | 0.45653  | 0.34594  | 0.25493  | -0.15863 | -0.40664 | -0.36147 | -0.56323 | -0.81609 |
| PF07_0110   | -0.89341 | -0.80677 | -0.53952 | -0.41442 | -0.21766 | 0.20687  | 0.55926  | 0.7825   | 0.97998  | 1.04275  | 1.09611  | 1.03064  | 1.02226  | 0.71026  | 0.53244  | 0.29645  | 0.00814  | -0.08161 | -0.31673 | -0.55155 | -0.68675 | -0.75275 | -0.81776 | -0.69036 |
| PF11_0088   | -0.43659 | 0.13463  | 0.12649  | -0.04852 | 0.03334  | 0.25184  | 0.17821  | 0.45807  | 0.61991  | 0.4796   | 0.62666  | 0.4156   | 0.50337  | 0.11541  | 0.29725  | 0.0058   | 0.03637  | -0.49152 | -0.44497 | -0.84174 | -0.88876 | -0.6851  | -0.64621 | -0.3012  |
| PF11_0416   | 0.31587  | 0.56742  | 0.60725  | 0.36571  | 0.33996  | 0.44806  | 0.53649  | 0.13047  | 0.20918  | 0.2942   | 0.36241  | 0.4465   | 0.42118  | 0.31896  | 0.27032  | 0.25915  | 0.64519  | 0.39164  | 0.1437   | 0.44162  | 0.49529  | 0.47835  | 0.53798  | 0.58404  |
| PF13_0050   | -0.63222 | -0.64206 | -0.33466 | -0.39322 | -0.40761 | -0.36336 | -0.32089 | -0.41043 | -0.14223 | 0.01318  | -0.0237  | 0.07542  | 0.26761  | 0.35347  | 0.42452  | 0.46731  | 0.6112   | 0.45096  | -0.00732 | 0.20739  | 0.19772  | 0.04051  | -0.09497 | -0.11431 |
| PF13_0122   | 0.31673  | 1.05937  | 0.91615  | 1.30263  | 1.16073  | 1.30796  | 1.17743  | 1.18857  | 0.95522  | 0.52088  | 0.501    | 0.49848  | 0.39594  | 0.24379  | 0.42779  | 0.34675  | -0.15656 | 0.13993  | 0.01316  | -0.36084 | -0.52874 | -0.17163 | -0.1137  | 0.11596  |
| PFB0106c    | 1.61782  | 1.85069  | 1.90476  | 2.14392  | 2.10768  | 1.85821  | 1.40876  | 0.78976  | -0.05169 | -0.95898 | -1.66352 | -2.26805 | -2.63197 | -2.98554 | -2.81264 | -3.50502 | -2.90168 | -2.89989 | -2.01263 | -0.90923 | -0.03604 | 0.70546  | 1.00624  | 1.40243  |
| PFI0930c    | -0.19093 | 0.17986  | 0.08424  | -0.01927 | -0.03829 | -0.04717 | -0.49607 | -0.49937 | -0.52885 | -0.24193 | -0.24691 | 0.3564   | 0.14186  | 0.32457  | 0.43979  | 0.24962  | -0.26255 | -0.26583 | -0.91265 | -1.14415 | -1.10347 | -0.9386  | -0.90385 | -0.82011 |
| PF11_0437   | -0.24562 | 0.58524  | 0.57225  | 0.61437  | 0.53222  | 0.81311  | 0.73907  | 1.02556  | 0.78147  | 0.85325  | 0.97599  | 1.01397  | 0.54345  | 0.2517   | 0.34383  | -0.07107 | -0.19083 | -0.76843 | -0.93811 | -1.25692 | -1.22992 | -0.82824 | -0.75535 | -0.61211 |
| PF14_0130   | -0.66027 | -0.59092 | -0.38716 | -0.65991 | -0.61685 | -0.42318 | -0.63406 | -0.78578 | -0.96579 | -0.79413 | -0.48667 | -0.7637  | -0.63885 | -0.6526  | -0.68692 | -0.49172 | -1.51579 | -0.83374 | -0.79833 | -0.75375 | -0.87363 | -0.69894 | -0.58492 | -0.45962 |
| MAL13P1.215 | -0.8181  | -1.49503 | -1.36026 | -1.79434 | -2.28399 | -2.51066 | -2.83175 | -2.83707 | -2.85218 | -2.47855 | -2.01804 | -1.37399 | -0.7697  | -0.61185 | 0.21892  | 0.71745  | 1.1319   | 0.8146   | 1.12774  | 0.55153  | 0.24899  | -0.20895 | -0.16181 | -0.7445  |
| PF14_0221   | 0.67861  | 0.7961   | 1.08188  | 1.22404  | 1.03631  | 1.10263  | 1.00281  | 1.0651   | 1.06684  | 0.86997  | 0.82607  | 0.80987  | 0.43115  | 0.24736  | -0.14832 | -0.14001 | -0.58465 | -0.63112 | -0.19724 | -0.38429 | -0.08325 | 0.26     | 0.53734  | 0.37421  |
| PF13_0261   | 0.93142  | 1.25349  | 1.16948  | 1.40483  | 1.33274  | 1.38729  | 1.36649  | 1.23408  | 1.06194  | 1.01108  | 0.80596  | 0.67444  | 0.44203  | 0.22254  | 0.07331  | -0.11858 | -0.57614 | -0.51669 | -0.29144 | -0.30507 | -0.08279 | 0.13364  | 0.38619  | 0.65747  |
| PF11_0135   | 0.64726  | 0.73818  | 0.33329  | 0.27404  | 0.43464  | 0.06393  | 0.04138  | -0.17772 | -0.30519 | -0.44989 | -0.52354 | -0.64171 | -0.63378 | -0.49685 | -0.28578 | 0.07208  | 0.59741  | 0.68432  | 0.66789  | 0.77914  | 1.07215  | 0.63461  | 0.40033  | 0.24665  |
| PFL2315c    | -0.39702 | -0.48721 | -0.6473  | -0.57353 | -0.73335 | -0.65212 | -0.70879 | -0.51752 | -0.27302 | -0.14357 | 0.18003  | 0.32296  | 0.53053  | 0.51001  | 0.75653  | 0.73604  | 0.58712  | 0.49639  | 0.83744  | 0.25701  | -0.07649 | -0.26453 | -0.31111 | -0.26847 |
| PF14_0247   | 0.80162  | 0.79582  | 1.04461  | 1.01458  | 0.90833  | 0.81405  | 0.67137  | 0.5744   | 0.61341  | 0.64684  | 0.4767   | 0.45714  | 0.37792  | 0.38672  | -0.04939 | -0.3645  | -0.43633 | -0.55319 | -0.78765 | -0.49299 | -0.11508 | 0.04494  | 0.39987  | 0.58451  |
| PFE1375c    | -0.01435 | -0.23915 | -0.39177 | -0.34231 | -0.51886 | -0.3297  | -0.37735 | -0.41443 | -0.21351 | -0.13938 | 0.01306  | 0.37449  | 0.14473  | 0.22906  | 0.19539  | 0.51508  | 0.04209  | 0.60586  |          |          |          |          |          |          |

|                 |          |          |          |          |          |          |          |          |          |          |          |          |          |          |          |          |          |          |          |          |          |          |          |          |
|-----------------|----------|----------|----------|----------|----------|----------|----------|----------|----------|----------|----------|----------|----------|----------|----------|----------|----------|----------|----------|----------|----------|----------|----------|----------|
| PF08 0060       | -1.45217 | -1.75657 | -1.51825 | -1.48945 | -1.31109 | -0.41821 | 0.91086  | 1.14537  | 1.43054  | 1.34195  | 0.96693  | 0.84206  | 0.54625  | 0.48341  | 0.09741  | 0.01765  | 0.12673  | -0.2103  | -0.56311 | -0.45918 | -0.64656 | -0.514   | -0.58039 | -0.74064 |
| PF10 0171       | 0.35133  | 0.67082  | 0.50296  | 0.67582  | 0.52237  | 0.39248  | 0.45564  | 0.55911  | 0.55945  | 0.45397  | 0.38106  | 0.46808  | 0.4928   | 0.57079  | 0.19918  | -0.14424 | -0.22125 | -0.22115 | -1.1531  | -0.6099  | -0.46873 | -0.04663 | 0.01649  | 0.21226  |
| PFE0127c        | -0.42906 | -0.29719 | -0.16003 | -0.51109 | -0.32684 | -0.28785 | -0.09296 | 0.01546  | 0.16644  | 0.57422  | 0.69365  | 0.90135  | 0.82907  | 0.73898  | 0.30007  | 0.02644  | -0.01113 | -0.00209 | -0.70884 | -0.46467 | -0.45284 | -0.26633 | -0.36957 | -0.30376 |
| PFD0207c        | -0.43519 | -0.02978 | 0.31805  | 0.30671  | 0.25897  | 0.54743  | 0.40283  | 0.18959  | 0.36655  | 0.19623  | 0.17377  | 0.12934  | 0.3213   | 0.31288  | 0.30081  | 0.12745  | 0.04894  | 0.04396  | -0.60911 | -0.62353 | -0.80453 | -0.51399 | -0.49471 | -0.52761 |
| MAL13P1.23      | 0.76178  | -0.0432  | -1.07536 | -0.39355 | -0.44052 | -0.63531 | -0.71036 | -0.9164  | -0.95363 | -0.97085 | -1.01975 | -1.10842 | -1.37042 | -1.42348 | -1.46801 | -0.89611 | -0.14166 | -0.00859 | 1.65417  | 1.10356  | 1.09101  | 0.86634  | 1.31505  | 1.16893  |
| PF10 0070       | -1.12356 | -0.96986 | -0.40029 | -0.86147 | -0.44322 | 0.01486  | 0.35262  | 0.32071  | 0.33814  | 0.19133  | 0.48802  | 0.39564  | 0.63131  | 0.40137  | 0.63921  | 0.48986  | 0.18089  | 0.04226  | -0.08535 | -0.51152 | -0.8857  | -0.72597 | -0.93678 | -0.79161 |
| PF11 0094       | 1.17538  | 0.91413  | 0.3522   | 0.43249  | 0.25254  | 0.0244   | -0.21715 | -0.33645 | -0.9555  | -1.12039 | -1.13364 | -1.17279 | -1.502   | -1.43318 | -1.50933 | -0.48849 | 0.39698  | 0.73766  | 1.57751  | 1.47734  | 1.52787  | 1.46577  | 1.44885  | 1.09603  |
| PF1155w         | -0.47377 | -0.79275 | -0.51114 | -0.75335 | -0.86233 | -0.69687 | -0.70646 | -0.7773  | -0.97168 | -1.0109  | -0.60132 | -0.23433 | -0.0276  | 0.16943  | 0.39642  | 0.71467  | 0.79666  | 0.21893  | 0.62293  | 0.46119  | 0.20901  | -0.31143 | -0.17434 | -0.81138 |
| PF10 0296       | 0.61505  | 0.63687  | 0.0292   | 0.2033   | 0.48041  | -0.34004 | -0.50985 | -0.08535 | -0.71335 | -0.84293 | -0.8649  | -1.01093 | -1.80944 | -1.64271 | -1.94242 | -1.63052 | -1.61488 | -0.148   | -0.05518 | 0.64995  | 0.77647  | 0.53456  | 0.84339  | 0.88026  |
| PF10 0275       | 0.2638   | 0.42705  | 0.81046  | 0.73551  | 0.73257  | 0.90274  | 0.98685  | 1.06619  | 1.12776  | 1.01028  | 1.00596  | 0.77364  | 0.59369  | 0.325    | 0.24587  | -0.32984 | -0.28268 | -0.11426 | -0.29021 | -0.27132 | -0.1854  | -0.1935  | 0.08282  |          |
| PFE0715w        | -0.99524 | -0.99306 | -0.95887 | -1.12631 | -0.79534 | -0.63101 | -0.24803 | 0.22616  | 0.55267  | 0.8085   | 0.66493  | 0.78536  | 0.78945  | 0.83136  | 0.61125  | 0.40404  | 0.08074  | 0.28109  | -0.37213 | -0.16609 | -0.19549 | -0.44956 | -0.48424 | -0.64872 |
| PFA0305c        | 0.31015  | 0.03225  | 0.13342  | -0.38694 | -0.63959 | -0.77866 | -0.872   | -1.11509 | -1.32339 | -1.33038 | -1.11554 | -0.92893 | -0.7121  | -0.32603 | 0.45605  | 0.98507  | 0.9909   | 1.08623  | 1.19712  | 0.93696  | 0.86145  | 0.36317  | 0.12184  | -0.18002 |
| MAL13P1.211     | 0.76298  | 0.8281   | 1.11444  | 0.90041  | 0.89228  | 0.72697  | 0.18233  | 0.57817  | 0.14543  | 0.1474   | 0.35238  | -0.06577 | -0.13994 | -0.2576  | -0.32721 | -0.40224 | -0.50638 | -0.13618 | 0.97039  | 0.48094  | 0.76799  | 0.52139  | 1.14106  | 1.52347  |
| PF13 0257       | 0.07532  | 0.55409  | 0.39401  | 0.45034  | 0.39349  | 0.23856  | 0.15446  | 0.18189  | -0.00551 | 0.10829  | 0.2903   | 0.30721  | 0.29585  | 1.0814   | 0.03361  | -0.40493 | -0.54405 | -0.92191 | -1.43546 | -1.34055 | -0.93126 | -0.61332 | -0.5505  | -0.3514  |
| PF11 0424       | -0.25165 | -0.31251 | -0.31532 | -0.3424  | -0.54863 | -0.65003 | -0.61764 | -0.79463 | -0.81344 | -0.47761 | -0.35923 | -0.24086 | -0.09747 | 0.25223  | 0.43457  | 0.36639  | 0.35881  | 0.19288  | -0.03408 | 0.13376  | 0.14736  | -0.08684 | -0.15616 | -0.13755 |
| PFL1995c        | -0.89332 | -1.0003  | -0.66245 | -0.53365 | -0.15235 | 0.24291  | 0.5268   | 0.95894  | 1.21709  | 1.27325  | 1.25851  | 1.22613  | 0.87486  | 0.67257  | 0.26168  | 0.15866  | -0.25458 | 0.08728  | -0.57909 | -0.35856 | -0.47787 | -0.77034 | -0.57794 | -0.53279 |
| MAL13P1.63      | -0.49041 | -0.40066 | -0.19887 | -0.46062 | -0.35635 | -0.32975 | -0.0116  | 0.01609  | -0.03352 | 0.03533  | -0.15391 | -0.12764 | -0.04911 | -0.04634 | -0.04737 | -0.23009 | 0.02799  | 0.03079  | -0.5317  | 0.00986  | -0.08758 | -0.0813  | -0.01123 | -0.15593 |
| PFL1505c        | 0.91192  | 0.26874  | 0.01144  | 0.01631  | 0.16767  | -0.2887  | -0.48794 | -0.72248 | -1.16649 | -1.45038 | -1.42499 | -1.56473 | -1.67065 | -1.68097 | -1.44927 | -1.4063  | -0.96871 | -0.33191 | 1.51261  | 0.9903   | 1.24342  | 1.03835  | 1.37242  | 1.7946   |
| PFC0255c        | -0.50885 | -0.33066 | -0.09974 | -0.24996 | -0.22075 | -0.12306 | -0.04931 | 0.03097  | -0.14661 | -0.35245 | -0.14877 | -0.20565 | -0.31364 | -0.2427  | 0.02576  | 0.18413  | -0.05417 | -0.06008 | 0.29639  | -0.22637 | -0.36717 | -0.62602 | -0.45891 | -0.28129 |
| PFL0145c        | -0.28548 | 0.12506  | -0.16064 | -0.10993 | -0.10896 | -0.30536 | -0.40929 | -0.69427 | -1.16533 | -0.91872 | -0.86719 | -0.90083 | -0.56709 | -0.53458 | 0.2034   | 0.0407   | -0.06886 | -0.35768 | -0.25229 | -0.02892 | -0.17343 | -0.37452 | -0.1292  | -0.08451 |
| PFL1200w        | 0.76912  | 0.80465  | 0.71959  | 0.76827  | 0.57856  | 0.56502  | 0.40373  | 0.38473  | 0.32811  | 0.30489  | 0.2402   | 0.25946  | 0.2336   | 0.02041  | -0.2117  | -0.28016 | -0.10947 | -0.12858 | 0.15522  | 0.13876  | 0.34702  | 0.49943  | 0.47599  |          |
| PFL0320w        | 0.99312  | 0.59224  | -0.51476 | -0.00327 | -0.46891 | -0.82096 | -1.12459 | -1.38539 | -1.4689  | -1.49337 | -1.45138 | -1.2055  | -1.23507 | -1.198   | -0.96894 | -0.29876 | 0.17485  | 0.85836  | 1.70254  | 1.54783  | 1.26724  | 0.10106  | 1.44211  | 0.88948  |
| PFD1065c        | 0.4936   | 0.73898  | 0.7206   | 0.90143  | 0.98718  | 1.05528  | 0.88155  | 0.84262  | 0.71962  | 0.49712  | 0.65478  | 0.61346  | 0.50482  | 0.33404  | 0.46419  | 0.36698  | 0.05636  | 0.16786  | 0.33028  | -0.03527 | -0.15668 | -0.09293 | 0.12325  | 0.31025  |
| PF10 0123       | 0.39398  | 0.7854   | 0.57709  | 0.82807  | 0.82105  | 0.89624  | 0.69152  | 0.73979  | 0.75475  | 0.8618   | 0.95929  | 0.94279  | 0.72931  | 0.2056   | -0.07088 | -0.56238 | -0.87173 | -1.04917 | -1.40133 | -1.59541 | -1.16604 | -0.5581  | -0.42334 | -0.16508 |
| PF14 0355       | 0.01016  | -0.09766 | -0.15874 | -0.00983 | -0.07434 | -0.11605 | -0.09315 | -0.17205 | -0.67754 | -0.93026 | -0.42711 | -0.27053 | -0.38585 | -0.00737 | 0.34141  | 0.67158  | 0.33539  | 0.27333  | 0.3893   | 0.07109  | -0.18939 | -0.2857  | -0.25341 | -0.18244 |
| PF10 0030       | -0.40215 | -0.79478 | -0.73598 | -0.9433  | -0.61793 | -0.62401 | -0.30047 | 0.01786  | 0.22973  | 0.49519  | 0.58406  | 0.70646  | 0.74344  | 0.76176  | 0.65825  | 0.38892  | 0.35117  | 0.29992  | 0.08229  | -0.02155 | -0.39011 | -0.68266 | -0.49856 | -0.12629 |
| PF10 0052       | -0.63489 | -0.69876 | -2.85269 | -0.37862 | -0.41909 | -0.61897 | -0.36799 | -0.15396 | -0.00157 | 0.1803   | 0.67474  | 0.68256  | 0.73586  | 0.41722  | 0.80751  | 0.76722  | 0.50496  | 0.14824  | 0.45933  | -0.27227 | -0.07407 | -0.11729 | -0.17586 | -0.14553 |
| PF10 0072       | 0.92264  | 0.37968  | 0.08264  | 0.15786  | -0.05176 | -0.37902 | -0.67739 | -0.99022 | -1.62756 | -1.89403 | -1.82294 | -1.98896 | -2.02481 | -1.99901 | -1.48046 | -0.64099 | 0.40836  | 0.43326  | 1.86888  | 1.47044  | 1.45885  | 1.02049  | 1.30144  | 1.21472  |
| MAL8P1.34       | -1.08809 | -0.93547 | -1.19952 | -1.02303 | -1.06552 | -1.04506 | -0.74145 | -0.31603 | 0.13882  | 0.37937  | 0.67437  | 0.64491  | 0.89305  | 0.85486  | 0.6411   | 0.35131  | 0.04244  | -0.07055 | -0.30075 | -0.73151 | -0.75619 | -0.96863 | -0.97717 | -0.87939 |
| PFD1075w        | -0.32646 | -0.55403 | -0.77716 | -1.10567 | -1.20425 | -1.19156 | -1.19265 | -1.17063 | -0.73687 | -0.43656 | -0.081   | 0.1459   | 0.10453  | 0.45017  | 0.63934  | 0.79981  | 0.60983  | 0.55057  | 0.93303  | 0.45138  | 0.09666  | -0.17625 | -0.39364 | -0.72874 |
| PF14 0432       | 0.37641  | 0.45996  | 0.68462  | 0.88666  | 1.00231  | 1.5486   | 1.84489  | 1.64783  | 1.50053  | 0.75458  | 0.59915  | 0.20419  | -0.44771 | -0.83346 | -0.87214 | -0.88041 | -1.00784 | -1.03279 | 0.59739  | 0.08602  | 0.21508  | 0.13838  | 0.58289  | 0.62598  |
| PFL2470c        | -0.07212 | 0.28363  | 0.2613   | 0.73413  | 0.80229  | 1.00913  | 0.87958  | 0.94461  | 0.64876  | 0.64773  | 0.674    | 0.55257  | 0.46701  | 0.30309  | 0.0912   | 0.03257  | -0.2256  | -0.23036 | -0.20026 | -0.39876 | -0.60392 | -0.24711 | -0.10552 | 0.12163  |
| PFE0365c        | 0.89123  | 0.60053  | 0.3461   | -0.39526 | -0.6992  | -0.69044 | -1.21878 | -1.57133 | -1.76244 | -2.88425 | -2.23433 | -2.57125 | -2.81583 | -2.56343 | -1.8312  | -1.4566  | -1.391   | -0.83265 | 1.7072   | 1.09214  | 1.11178  | 1.11762  | 1.19049  | 2.27696  |
| PFB0340c        | -1.58998 | -1.59953 | -2.42059 | -3.51699 | -3.98333 | -4.31973 | -4.46647 | -4.91819 | -5.48673 | -5.73155 | -5.67831 | -4.77081 | -2.39549 | -0.5695  | 0.5928   | 1.08837  | 0.93934  | 1.17799  | 0.3119   | 0.66279  | 0.07814  | -0.40612 | -1.60929 | -2.47257 |
| PFC10_API0007:t |          |          |          |          |          |          |          |          |          |          |          |          |          |          |          |          |          |          |          |          |          |          |          |          |
| RNA             | -0.09367 | 0.4506   | -1.21714 | -1.14579 | -1.91668 | -1.14044 | -1.60879 | -0.90918 | -2.36742 | -1.93682 | -1.37323 | -1.14942 | -1.49736 | -1.17611 | -0.28472 | 0.30157  | -0.4072  | 0.88943  | 1.02731  | 0.4539   | 0.99328  | 1.27276  | 1.07618  | 0.77638  |
| PF14 0151       | 0.21621  | -0.21836 | -0.67602 | -0.48879 | -0.62307 | -0.46531 | 0.11     | 0.51488  | 0.39885  | 0.35352  | 0.55143  | 0.16015  | -0.16831 | -0.31552 | -0.27118 | 0.03759  | 0.17925  | 0.48322  | 1.13606  | 0.81811  | 0.60458  | 0.38318  | 0.52023  | 0.31443  |
| PF1725w         | 1.28183  | 1.53024  | 1.37336  | 0.93077  | 0.71197  | 0.50024  | 0.336    | 0.50261  | 0.55975  | 0.21406  | -0.61952 | -0.8977  | -1.67176 | -2.04489 | -2.34599 | -2.48872 | -1.65455 | -1.01316 | 0.48593  | 0.55748  | 0.83105  | 1.13168  | 1.19316  | 1.12749  |
| PF13 0209       | 0.45748  | 0.84138  | 0.9865   | 0.95338  | 0.89215  | 0.8472   | 0.62173  | 0.48744  | 0.30714  | 0.2687   | 0.29445  | 0.49487  | 0.39475  | 0.25744  | 0.03815  | -0.13565 | -0.44587 | -0.35087 | -0.6983  | -0.85171 | -0.59356 | -0.26602 | -0.18401 | 0.13072  |
| PFL2535w        | -0.81938 | -0.393   | -0.12679 | -0.23121 | -0.21545 | -0.00413 | -0.02966 | -0.25264 | 0.06005  | 0.38926  | 0.54589  | 0.76864  | 0.55323  | 0.30233  | 0.42737  | -0.27613 | -0.05711 | 0.10754  | -0.02895 | -0.22748 | -0.75767 | -0.64794 | -0.55908 | -0.55232 |
| PF10 0200       | 0.79345  | 0.8394   | 0.81687  | 0.98607  | 0.8087   | 0.7971   | 0.86398  | 0.86214  | 1.04174  | 0.95314  | 0.90694  | 0.64784  | 0.47336  | 0.10375  | -0.32332 | -0.73672 | -0.74638 | -0.97095 | -1.04736 | -0.723   | -0.26537 | -0.03623 | 0.22491  | 0.60974  |
| PFE1500c        | 0.69267  | 0.69699  | 0.48741  | 0.61323  | 0.28272  | 0.15873  | -0.0801  | -0.26275 | -0.30231 | -0.1846  | 0.1243   | 0.74314  | 0.67522  | 0        |          |          |          |          |          |          |          |          |          |          |

|             |          |          |          |          |          |          |          |          |          |          |          |          |          |          |          |          |          |          |          |          |          |          |          |          |
|-------------|----------|----------|----------|----------|----------|----------|----------|----------|----------|----------|----------|----------|----------|----------|----------|----------|----------|----------|----------|----------|----------|----------|----------|----------|
| PFB0920w    | 1.1032   | 1.3012   | 1.31023  | 1.54977  | 1.54118  | 1.44468  | 1.30889  | 1.36631  | 1.12404  | 0.61761  | 0.27085  | -0.14783 | -0.49446 | -0.73034 | -0.64141 | -0.7454  | -0.72477 | -0.7271  | -0.60925 | -0.32048 | 0.15199  | 0.59081  | 0.93874  | 0.93863  |
| MAL13P1.335 | -0.26772 | -0.30742 | 0.05278  | 0.08471  | 0.4827   | 0.76392  | 1.04691  | 1.35828  | 1.17312  | 1.10775  | 0.95878  | 0.60341  | 0.46646  | 0.26732  | 0.03519  | 0.15405  | -0.25492 | -0.25846 | 0.25912  | -0.05387 | -0.25187 | -0.04355 | -0.11815 | 0.05866  |
| PF11 0224   | -0.22513 | 0.02661  | -0.23722 | 0.24953  | 0.50839  | 0.11657  | 0.17616  | 0.0668   | 1.07001  | 0.90633  | 0.62766  | 0.80609  | 0.4024   | 0.12647  | -0.29656 | -0.74264 | -0.75315 | -1.03548 | -0.76241 | -0.35969 | -0.21942 | -0.52516 | 0.46515  | 0.6651   |
| PF11780w    | -2.68347 | -2.18957 | -1.28957 | -0.55863 | 0.41007  | 1.61151  | 2.5074   | 2.60585  | 1.97473  | 1.37329  | 0.75834  | 0.49764  | -0.08482 | -0.59052 | -0.95456 | -1.365   | -1.67382 | -2.21272 | -2.34979 | -2.85009 | -2.94775 | -2.60473 | -2.55592 | -1.80247 |
| PF11045w    | 0.22053  | 0.21044  | 0.5227   | 0.60429  | 0.57669  | 1.03262  | 1.12173  | 0.86569  | 0.9877   | 0.90044  | 0.93197  | 0.89158  | 0.70072  | 0.51881  | 0.49173  | 0.30336  | 0.06949  | -0.00038 | 0.16847  | -0.32453 | -0.2796  | -0.16735 | -0.21536 | 0.0383   |
| PF10 0051   | -0.63304 | -0.82907 | -0.28024 | -0.12408 | 0.43522  | 0.82261  | 1.05329  | 1.06984  | 0.92436  | 0.6797   | 0.70662  | 0.69403  | 0.69289  | 0.55641  | 0.55642  | 0.30999  | 0.3439   | 0.20494  | -0.00223 | -0.36083 | -0.76785 | -0.90936 | -0.92962 |          |
| PF14 0046   | 0.58604  | 0.27457  | -0.02263 | 0.11133  | 0.11817  | -0.03781 | -0.12171 | -0.07755 | -0.28946 | -0.19344 | -0.22372 | -0.15923 | -0.19557 | -0.27999 | -0.11228 | -0.25801 | -0.46925 | -0.39564 | 0.28006  | 0.11569  | 0.09449  | 0.37897  | 0.63911  | 0.94804  |
| PF11 0427   | -0.82612 | -0.61404 | -0.73145 | -0.96542 | -0.76822 | -0.44959 | -0.20306 | -0.15749 | 0.30728  | 0.17287  | 0.4482   | 0.53197  | 0.69579  | 0.73462  | 0.8809   | 0.73373  | 0.37387  | 0.48084  | 0.31856  | 0.07961  | -0.42373 | -0.8416  | -0.9573  | -0.95734 |
| PFL2200w    | -0.00663 | 0.08711  | -0.06017 | 0.0912   | 0.2028   | 0.25106  | 0.18084  | 0.32008  | 0.12041  | 0.20397  | 0.56978  | 0.61078  | 0.53721  | 0.46402  | 0.48731  | 0.4147   | -0.1192  | 0.32983  | -0.14151 | -0.32257 | -0.48053 | -0.37622 | -0.28914 | -0.11273 |
| PF11465w    | -0.36598 | -0.01329 | -0.90093 | 0.19066  | 0.17134  | 0.24116  | 0.11013  | 0.31313  | -0.01036 | 0.01853  | 0.1157   | 0.30689  | 0.22725  | -0.60197 | 0.36454  | 0.22815  | -0.50795 | 0.11745  | 0.2193   | 0.31953  | 0.57368  | 0.53803  | 1.10043  | 1.10742  |
| PF1015w     | 0.50003  | -0.252   | -0.33499 | -0.52234 | -0.75823 | -0.88014 | -1.14258 | -1.09175 | -1.18712 | -1.46789 | -1.50776 | -1.50469 | -1.60893 | -1.61966 | -1.44891 | -0.94666 | -0.24976 | 0.01399  | 1.39228  | 1.05682  | 1.04139  | 0.94041  | 1.24418  | 1.00844  |
| PF07 0127   | 1.37499  | 0.83975  | -0.05458 | 0.19813  | 0.36266  | -0.26386 | -0.59107 | -0.75041 | -0.9729  | -0.82038 | -0.70813 | -0.71598 | -0.82867 | -0.67901 | -0.85221 | -0.59773 | -0.40048 | 0.02257  | 2.24399  | 1.50327  | 1.58981  | 1.14355  | 1.5452   | 2.07748  |
| PF11405c    | -0.73229 | -0.55596 | -0.43944 | -0.51405 | -0.41061 | 0.50807  | 1.168    | 1.7781   | 1.95389  | 1.62491  | 1.4787   | 1.16547  | 0.65096  | 0.34815  | 0.18499  | 0.02222  | -0.14072 | -0.41771 | -0.17252 | -0.39841 | -0.19545 | -0.26502 | -0.05748 | -0.11888 |
| PFL0275w    | 0.86321  | 0.51179  | 0.44329  | 0.37394  | 0.45399  | 0.01049  | -0.40252 | -0.89573 | -1.28933 | -1.49276 | -1.59168 | -1.59377 | -1.32658 | -0.87232 | -0.65645 | -0.4912  | -0.485   | -0.31072 | -0.08914 | 0.91745  | 0.9825   | 0.67057  | 0.94729  | 1.12312  |
| PFF1160w    | -0.26818 | -0.51929 | -0.94079 | -0.17931 | -0.59938 | -0.53753 | -0.81454 | -0.95381 | -0.5614  | 0.2143   | 0.54825  | 0.78369  | 0.60648  | 0.58556  | 0.6119   | 0.65866  | 0.46951  | 0.34501  | 0.7616   | 0.26698  | 0.03473  | -0.03683 | -0.01711 | -0.25494 |
| PFL2390c    | -0.03178 | -0.1684  | 0.0921   | -0.31647 | -0.40185 | -0.36106 | -0.27083 | -0.35598 | -0.02332 | 0.10216  | -0.07377 | 0.06925  | 0.11851  | 0.17157  | -0.02957 | -0.17681 | -0.01772 | -0.09848 | -0.3195  | -0.0495  | -0.03118 | 0.20166  | 0.10828  | -0.01423 |
| PF10 0310   | -0.55797 | -0.29185 | -0.0823  | -0.2664  | -0.04996 | 0.06609  | 0.12127  | 0.32345  | 0.41161  | 0.40613  | 0.36775  | 0.25903  | 0.37631  | 0.50641  | 0.446    | 0.33408  | 0.04605  | 0.31648  | -0.24518 | -0.02919 | -0.15834 | -0.40852 | -0.52337 | -0.49114 |
| PF00705c    | -0.71969 | -0.74574 | -0.94771 | -1.11635 | -1.00488 | -1.11475 | -1.09473 | -0.98983 | -0.92443 | -0.58663 | -0.29715 | 0.00908  | 0.33343  | 0.73044  | 0.62766  | 0.69468  | 0.52701  | 0.65971  | -0.1168  | 0.2065   | 0.0558   | -0.17366 | -0.45948 | -0.64882 |
| PFC0890w    | -0.26071 | 0.03876  | 0.0296   | 0.55654  | 0.5576   | 0.54594  | 0.39087  | 0.5724   | 0.08899  | 0.1192   | 0.07806  | 0.11679  | 0.28584  | 0.24408  | 0.54753  | 0.63803  | 0.4164   | 0.17087  | 0.84504  | 0.20633  | -0.02611 | -0.04168 | 0.00421  | -0.0707  |
| PFL1015c    | 0.8441   | 1.52173  | 1.03943  | 1.33564  | 1.23059  | 1.39191  | 1.05962  | 1.0486   | 0.84313  | 0.56686  | 0.56939  | 0.44164  | 0.37755  | 0.12734  | 0.14583  | 0.0027   | -0.13402 | -0.1426  | -0.22961 | -0.44506 | -0.2843  | -0.0347  | 0.09429  | 0.24403  |
| PF14 0495   | -0.00974 | -0.62387 | -0.64346 | -1.58695 | -1.86718 | -2.06174 | -2.66714 | -3.06103 | -3.41168 | -3.8338  | -3.9378  | -4.4674  | -4.19578 | -3.21116 | -1.49376 | 0.11465  | 1.04514  | 1.07658  | 1.29354  | 1.23371  | 1.02949  | 0.80774  | 0.40984  | -0.22241 |
| PFB0585w    | -0.26553 | -0.76895 | -0.61061 | -0.93329 | -1.02386 | -1.29511 | -1.35512 | -1.62815 | -1.68233 | -1.35476 | -1.0412  | -0.66219 | -0.33056 | -0.29177 | 0.2717   | 0.53666  | 0.6471   | 0.56718  | 1.02414  | 0.7294   | 0.45238  | 0.05407  | 0.26369  | 0.08748  |
| PFF0160c    | -0.40914 | 0.03075  | 0.08842  | 0.53817  | 0.5345   | 0.96986  | 1.17535  | 1.46352  | 1.62493  | 1.63082  | 1.61326  | 1.36893  | 1.053    | 0.58607  | 0.32896  | 0.06341  | -0.34098 | -0.32375 | -0.5447  | -0.96314 | -1.13515 | -1.03291 | -1       | -0.79174 |
| PF11 0249   | -0.43271 | -0.82635 | -0.91833 | -1.23198 | -1.22042 | -1.3136  | -1.1834  | -0.97908 | -0.57387 | -0.46653 | -0.13648 | -0.04851 | 0.28513  | 0.60195  | 0.64819  | 0.58781  | 0.51713  | 0.67778  | 0.11133  | 0.42745  | 0.1218   | -0.26248 | -0.30868 | -0.74787 |
| PFL0665c    | 0.10607  | 0.50498  | 0.58402  | 0.54638  | 0.62074  | 0.83306  | 0.73138  | 1.05855  | 0.87447  | 0.71641  | 0.90135  | 0.83798  | 0.53713  | -0.17985 | -0.17985 | -0.62672 | -0.80202 | -1.2308  | -1.15794 | -1.48704 | -1.22964 | -0.72943 | -0.43792 | 0.14627  |
| PF14 0426   | 0.72933  | 0.37213  | -0.15273 | 0.20776  | 0.37264  | 0.467    | 0.90297  | 1.36187  | 1.41533  | 1.27439  | 1.58902  | 1.39626  | 0.84137  | 0.36032  | 0.28878  | 0.00285  | -0.60475 | -0.30621 | 0.06724  | -0.04872 | 0.20202  | 0.09576  | 0.1286   | 0.10474  |
| PFL0220c    | 0.39061  | 0.76775  | 0.76425  | 1.02278  | 0.96068  | 1.03263  | 0.87852  | 1.42434  | 0.71336  | 0.39377  | 0.52126  | 0.32211  | 0.21416  | 0.05864  | -0.03773 | -0.07151 | -0.12212 | -0.15029 | 0.20807  | 0.24316  | 0.47041  | 0.51683  | 0.61661  | 0.745    |
| PF11600w    | 0.41288  | 0.66443  | 0.55915  | 0.79036  | 0.66131  | 0.559    | 0.43477  | 0.42572  | 0.2044   | -0.11923 | -0.10514 | -0.16063 | -0.21159 | -0.2664  | -0.24159 | -0.34717 | -0.41825 | -0.57393 | -0.14726 | -0.1071  | 0.18276  | 0.19698  | 0.34435  | 0.54024  |
| PF1245c     | -0.0151  | -0.15447 | -0.25104 | 0.01729  | -0.0701  | 0.18663  | 0.2523   | 0.60684  | 0.79268  | 0.76455  | 0.87978  | 0.70272  | 0.58596  | 0.47296  | 0.41689  | 0.37351  | -0.00729 | 0.12297  | 0.24595  | -0.14037 | -0.07503 | 0.09619  | 0.10727  | 0.2522   |
| PFL0185c    | -0.08341 | 0.05736  | 0.05232  | 0.06683  | -0.06056 | -0.38832 | -0.67517 | -0.60686 | -0.66336 | -0.34977 | -0.21885 | -0.00056 | 0.10794  | 0.24973  | 0.14432  | 0.09515  | -0.38332 | -0.41236 | -0.67745 | -0.90372 | -0.62596 | -0.58932 | -0.30914 | -0.13556 |
| PFC0425w    | 0.8462   | 0.60492  | 0.51422  | 0.23018  | -0.0282  | -0.01268 | 0.15622  | -0.09696 | 0.54438  | 0.45667  | 0.24819  | 0.25631  | 0.2796   | 0.27758  | -0.28536 | -0.62862 | -0.74369 | -0.75162 | -1.04    | 0.10668  | 0.29028  | 0.35892  | 0.54537  | 0.66291  |
| PF11 0356   | 0.04124  | 0.03117  | 0.0947   | 0.39485  | 0.72877  | 0.60013  | 0.8333   | 0.6406   | 0.30151  | 0.10687  | 0.07804  | 0.06339  | 0.04056  | 0.17064  | 0.18471  | 0.16555  | 0.28199  | 0.0782   | -0.29431 | -0.04392 | -0.00383 | -0.3551  | -0.36532 | -0.09198 |
| PFL1800w    | 0.75893  | 0.77782  | 0.72783  | 0.84926  | 0.8155   | 0.70343  | 0.83133  | 0.8479   | 1.08245  | 1.06265  | 0.90412  | 0.66777  | 0.38069  | 0.07696  | -0.04509 | -0.8426  | -0.91487 | -1.0911  | -0.48494 | -1.17849 | 0.18138  | 0.35002  | 0.50622  | 0.75716  |
| MAL13P1.290 | -0.69936 | -0.53731 | -0.37574 | -0.41671 | -0.37909 | -0.28215 | -0.30194 | -0.22761 | -0.1018  | 0.02474  | 0.22037  | 0.45926  | 0.616    | 0.47513  | 0.50325  | 0.43004  | 0.06438  | 0.01876  | -0.24395 | -0.32416 | -0.46635 | -0.5465  | -0.34141 | -0.31945 |
| PFF0585c    | -0.50685 | -0.54208 | -0.46793 | -0.68878 | -0.60339 | -0.8249  | -0.97284 | -0.86294 | -0.74023 | -0.63802 | -0.37089 | -0.02703 | 0.05229  | 0.07242  | 0.32484  | 0.50489  | 0.5519   | 0.71954  | 0.59775  | 0.31498  | 0.10528  | -0.31505 | -0.24659 | -0.38044 |
| PF11065c    | -0.63215 | -0.67259 | -0.33219 | -0.9042  | -0.97896 | -0.92033 | -0.74388 | 0.81134  | 0.20417  | 0.53173  | 0.65758  | 0.66936  | 0.74579  | 0.63265  | 0.8689   | 0.72909  | 0.66189  | 0.60595  | 0.36486  | 0.25576  | -0.18778 | -0.44254 | -0.74725 | -0.86143 |
| PF10 0312   | 0.29715  | -0.28194 | -0.48781 | -0.73519 | -0.77927 | -1.09905 | -1.28554 | -1.50656 | -1.57256 | -1.18529 | -1.24447 | -0.73669 | -0.54247 | -0.20608 | 0.32038  | 0.58046  | 0.68641  | 0.61779  | 1.47151  | 0.89664  | 0.77228  | 0.18227  | 0.29902  | 0.28878  |
| PF07 0117   | -0.41641 | 0.01753  | -0.21928 | -0.19517 | -0.04289 | -0.07117 | -0.04542 | 0.14614  | 0.13588  | 0.17765  | 0.43946  | 0.60309  | 0.67602  | 0.41957  | 0.38147  | 0.23619  | -0.17069 | -0.18932 | -0.62878 | -0.95843 | -0.93163 | -0.773   | -0.68477 | -0.67213 |
| PF14 0658   | -0.7782  | -0.52236 | -0.36185 | -0.84404 | -0.47969 | 0.06843  | 0.15756  | 0.33686  | 0.22829  | 0.05849  | 0.15765  | 0.19367  | 0.32924  | 0.29132  | 0.53902  | 0.69904  | 0.3338   | 0.46914  | 0.43675  | 0.27168  | -0.24525 | -0.55236 | -0.52713 | -0.61172 |
| PF10 0291   | -0.45194 | -0.78287 | -0.89051 | -0.94655 | -1.04734 | -0.85022 | -0.83562 | -0.59276 | -0.33703 | -0.05313 | 0.26251  | 0.57421  | 0.47104  | 0.52605  | 0.56807  | 0.69042  | 0.31866  | 0.48066  | 0.59583  | 0.19469  | 0.09175  | -0.18272 | -0.23432 | -0.43285 |
| PF14 0023   | -0.20158 | 0.39532  | 1.03892  | 0.69929  | 0.56298  | 1.19508  | 1.11548  | 0.76943  | 1.29408  | 1.32403  | 0.91904  | 1.02507  | 0.7283   | 0.58934  | 0.29389  | 0.13969  | 0.18736  | -0.34892 | -0.32852 | -0.48471 | -0.51152 | -0.32477 | -0.385   |          |



|            |          |          |          |          |          |          |          |          |          |          |          |          |          |          |          |          |          |          |          |          |          |          |          |          |
|------------|----------|----------|----------|----------|----------|----------|----------|----------|----------|----------|----------|----------|----------|----------|----------|----------|----------|----------|----------|----------|----------|----------|----------|----------|
| PF10_0214  | -0.79267 | -0.73074 | -0.31346 | -0.13097 | 0.11583  | 0.20538  | 0.36926  | 0.31096  | 0.80349  | 0.98482  | 0.89732  | 1.19514  | 0.86428  | 0.79346  | 0.22272  | -0.05492 | -0.11968 | -0.58883 | -1.00489 | -0.81704 | -0.92463 | -0.70562 | -0.74544 | -0.6052  |
| PFE1445c   | 0.49936  | 0.37701  | 0.24593  | 0.28528  | 0.08696  | 0.0553   | -0.00609 | 0.01659  | -0.13334 | -0.09404 | -0.00372 | -0.01782 | -0.15792 | -0.23555 | -0.25604 | -0.30051 | -0.39121 | -0.60405 | 0.4717   | 0.2037   | 0.18154  | 0.20106  | 0.33793  | 0.39536  |
| PF11_0448  | -0.29298 | -0.29841 | -0.36298 | -0.40026 | -0.30519 | -0.48893 | -0.4941  | -0.50814 | -0.60747 | -0.28456 | -0.03086 | 0.35681  | 0.38251  | 0.53846  | 0.51307  | 0.45894  | 0.41114  | 0.49682  | -0.12681 | 0.15993  | -0.06412 | 0.0169   | -0.05338 | -0.09109 |
| PF11_0086  | 0.40047  | 0.22645  | 0.37422  | 0.32581  | 0.29807  | 0.16839  | 0.16571  | -0.00158 | 0.21976  | 0.38849  | 0.11799  | 0.18763  | 0.14084  | 0.32968  | -0.21841 | -0.30681 | -0.2992  | -0.37293 | -1.27105 | -0.46873 | -0.14044 | -0.08007 | 0.04787  | 0.13448  |
| PF13_0246  | 0.21847  | 0.15926  | -0.08415 | -0.06799 | -0.1041  | -0.3313  | -0.1541  | -0.23038 | -0.304   | -0.26139 | -0.0489  | -0.06843 | 0.09862  | 0.01576  | 0.41936  | 0.55642  | 0.39311  | 0.66051  | 0.7378   | 0.5035   | 0.36772  | -0.08817 | 0.01878  | -0.08537 |
| PFL1210w   | -1.02557 | -0.90079 | -0.64485 | -0.86701 | -0.40977 | 0.3432   | 0.89359  | 0.90307  | 1.29223  | 1.2277   | 1.16071  | 1.09003  | 0.90367  | 0.81874  | 0.42068  | 0.08584  | 0.00101  | -0.07617 | -0.87686 | -0.57256 | -0.83913 | -0.66596 | -0.84169 | -0.85141 |
| PFB0595w   | -1.02971 | -0.51858 | -0.37138 | -0.52849 | -0.33497 | -0.15439 | 0.1163   | 0.59157  | 0.71715  | 0.72745  | 0.83649  | 0.79736  | 0.74713  | 0.40068  | 0.19189  | -0.06168 | -0.88681 | -0.6621  | -0.79071 | -1.23835 | -1.2049  | -0.95195 | -0.97579 | -0.72784 |
| PFI0260c   | 0.76477  | 1.00904  | 0.74911  | 0.69254  | 0.57431  | 0.61924  | 0.77041  | 0.27064  | 0.29317  | 0.1747   | 0.02521  | -0.0484  | -0.10824 | -0.05325 | -0.24384 | -0.15275 | 0.31172  | 0.1694   | 0.33138  | 0.41922  | 0.49979  | 0.64966  | 0.60275  | 0.53171  |
| PF10_0220  | 0.71326  | -0.25043 | -0.80279 | -0.22474 | -0.55089 | -0.68294 | -1.10996 | -1.30823 | -1.69384 | -1.79486 | -1.81942 | -1.80914 | -2.03268 | -2.09905 | -1.30727 | -0.48116 | 0.22375  | 0.24243  | 2.07604  | 1.40688  | 1.26311  | 0.56388  | 1.12644  | 1.20732  |
| PFL0475w   | 0.84064  | -0.15063 | -0.71322 | -0.39486 | -0.23893 | -0.72626 | -0.99306 | -1.21996 | -1.2735  | -1.12051 | -1.02928 | -0.81485 | -0.74217 | -0.55667 | -0.27345 | 0.05438  | 0.68517  | 0.51105  | 1.52505  | 1.25369  | 1.3081   | 0.94405  | 1.15121  | 1.00378  |
| PFD0385w   | -0.10642 | -0.64361 | -0.67096 | -1.17813 | -1.41762 | -1.61873 | -1.9341  | -2.34036 | -2.68624 | -3.06105 | -3.14077 | -3.05868 | -2.49225 | -1.77332 | -0.55866 | 0.26405  | 0.63582  | 0.68892  | 1.28673  | 1.17706  | 1.15425  | 0.86683  | 0.80753  | 0.42951  |
| MAL7P1.176 | 1.62478  | 0.3953   | -0.26225 | -0.96468 | -1.22896 | -1.97611 | -2.55851 | -3.11387 | -4.27154 | -4.52427 | -4.73461 | -5.33015 | -5.7677  | -6.20861 | -5.85435 | -5.18286 | -2.52117 | -1.5355  | 0.13048  | 1.39194  | 1.27898  | 1.13557  | 1.48873  | 1.45341  |
| PF11_0344  | 1.05956  | 0.09522  | -0.53743 | -0.83983 | -1.01786 | -1.62176 | -1.90616 | -2.24656 | -3.11357 | -3.50175 | -3.53333 | -3.82703 | -3.42739 | -2.9141  | -2.43385 | -2.02815 | -1.39778 | -0.65399 | 1.50813  | 1.20794  | 1.29522  | 1.13239  | 1.32423  | 1.53636  |
| PFL1490w   | 1.16636  | 1.40465  | 1.27078  | 1.23151  | 1.0543   | 0.8382   | 0.85578  | 0.76193  | 0.87936  | 0.63669  | 0.40171  | 0.29672  | -0.02728 | -0.55979 | -0.80354 | -1.24334 | -1.37385 | -1.5132  | -0.98447 | -0.4313  | 0.06731  | 0.5035   | 0.78071  | 0.95801  |
| PF10_0036  | -0.16918 | -0.4078  | -0.17878 | -0.02303 | 0.00833  | 0.17345  | 0.29945  | 0.49656  | 0.39582  | 0.42703  | 0.49869  | 0.33382  | 0.01826  | -0.37596 | -0.32541 | -0.31866 | -0.21986 | -0.48624 | 0.95949  | 0.19461  | 0.42113  | 0.28575  | 0.34421  | 0.53676  |
| PF10_0122  | 0.00045  | 0.13333  | 0.27109  | 0.70684  | 0.81532  | 0.8972   | 0.73486  | 0.78485  | 0.74963  | 0.83488  | 0.97665  | 0.76693  | 0.75596  | 0.54896  | 0.41529  | 0.23869  | -0.22057 | -0.3466  | -0.0653  | -0.70591 | -0.65591 | -0.64883 | -0.50581 | -0.42906 |
| MAL8P1.62  | -0.5451  | -1.06319 | -1.00873 | -1.51038 | -1.91665 | -1.61749 | -1.43058 | -1.12133 | -1.06385 | -0.80919 | 0.65062  | -0.6186  | -0.84002 | -0.9646  | -0.5597  | 0.19254  | 0.55752  | 0.59758  | 0.91427  | 0.69219  | 0.68662  | 0.22295  | 0.29813  | -0.35384 |
| PFD0415c   | -0.62314 | -0.69873 | -0.41033 | -0.612   | -0.69073 | -0.53855 | -0.67485 | -0.57743 | -0.23701 | 0.13077  | 0.63508  | 0.78317  | 0.85424  | 0.70333  | 0.76937  | 0.47415  | 0.16369  | -0.0503  | -0.09682 | -0.51925 | -0.62283 | -0.60012 | -0.50472 | -0.4918  |
| PFE0330w   | -0.28639 | -0.54407 | -0.4838  | -0.45769 | -0.09802 | -0.03045 | 0.18287  | 0.28499  | 0.19416  | -0.12203 | 0.02212  | -0.0161  | -0.03291 | 0.11083  | 0.31351  | 0.39023  | 0.17528  | 0.13804  | 0.25102  | 0.16955  | 0.11417  | -0.15042 | -0.27919 | -0.26401 |
| PFI0735c   | 0.15434  | -0.19489 | -0.51566 | -0.25526 | -0.29461 | -0.32    | -0.55646 | -0.75466 | -0.91971 | -1.06703 | -0.85229 | -0.65961 | -0.34915 | -0.22954 | 0.21417  | 0.50403  | 0.5996   | 0.67157  | 1.26254  | 0.9907   | 0.66958  | 0.31873  | 0.50787  | 0.24925  |
| PFI1445c   | 0.16418  | 0.35937  | 0.70625  | 0.72639  | 0.51822  | 0.64748  | 0.51095  | 0.25404  | 0.1078   | 0.01943  | 0.03135  | 0.11913  | 0.33964  | 0.26839  | 0.14031  | 0.22187  | -0.12087 | -0.15478 | -0.27287 | -0.3562  | -0.19534 | -0.05357 | 0.05875  |          |
| PFL0290w   | 0.76899  | 0.36077  | 0.06223  | -0.07595 | -0.07266 | -0.31062 | -0.29087 | -0.25553 | -0.29272 | 0.01529  | -0.13628 | 0.07118  | 0.08583  | 0.27968  | -0.05029 | -0.16318 | 0.00968  | -0.29457 | 0.15178  | 0.27612  | 0.41261  | 0.28993  | 0.32113  |          |
| PF07_0056  | 0.4143   | 0.18267  | -0.69307 | 0.34009  | 0.00941  | -0.11087 | -0.11013 | -0.09052 | -0.13863 | -0.17109 | -0.18814 | -0.28274 | -0.23572 | -0.06033 | 0.01484  | 0.0012   | 0.1367   | 0.15177  | 0.62077  | 0.35567  | 0.56093  | 0.52156  | 0.66332  | 0.48135  |
| PF14_0137  | 0.25801  | 0.4951   | 0.81685  | 0.60619  | 0.99048  | 0.53954  | 0.69881  | 0.87446  | 0.4772   | 0.32205  | 0.3688   | 0.22232  | 0.15854  | 0.26106  | 0.51025  | 0.33858  | 0.21439  | 0.05822  | 0.18164  | 0.3392   | 0.00279  | -0.16151 | 0.00351  | -0.0142  |
| MAL8P1.157 | -0.6887  | -0.46219 | -0.37358 | -0.31377 | -0.31374 | -0.22186 | -0.00665 | -0.12627 | 0.50416  | 0.60155  | 0.74649  | 0.74164  | 0.88734  | 0.94906  | 0.47916  | 0.1928   | -0.11415 | 0.0141   | -0.90943 | -0.63088 | -0.5931  | -0.66823 | -0.69426 | -0.67815 |
| PFA0470c   | 0.11302  | 0.04651  | -1.26919 | 0.52358  | 0.18372  | 0.17093  | 0.37041  | 0.99038  | 1.31567  | 0.98576  | 0.98644  | 0.80661  | 0.73012  | 0.47358  | 0.42963  | 0.25236  | -0.0483  | -0.02731 | 0.17614  | -0.21726 | -0.21079 | -0.2803  | -0.07752 | -0.14705 |
| PF11_0052  | 0.19018  | 0.45665  | 0.33359  | 0.34583  | 0.38988  | -0.03066 | -0.09293 | 0.16474  | 0.00405  | -0.03613 | 0.06281  | -0.12035 | -0.23762 | -0.27459 | -0.14299 | -0.23226 | -0.63132 | -0.46621 | -0.14093 | -0.21102 | -0.09205 | -0.2318  | 0.0246   | 0.37238  |
| PFA0495c   | 0.222    | 0.29914  | 0.41126  | 0.26836  | 0.46577  | 0.53084  | 0.43994  | 0.55945  | 0.61778  | 0.63846  | 0.82641  | 0.90725  | 0.79437  | 0.67183  | 0.46536  | 0.28508  | 0.01956  | -0.04837 | 0.12074  | -0.50863 | -0.43767 | -0.20844 | -0.16847 | 0.05698  |
| PFE0165w   | 0.4763   | -0.15067 | -1.08885 | -1.73819 | -2.32833 | -2.74501 | -3.12602 | -3.07697 | -2.66335 | -2.15966 | -1.4791  | -1.31714 | -1.01205 | -0.74499 | -0.09876 | 0.15578  | 0.06394  | 0.7095   | 0.4254   | 1.02202  | 0.88375  | 0.2513   | 0.33687  | 0.26989  |
| PFC0575w   | -0.99021 | -0.92563 | -1.04585 | -0.95732 | -1.15428 | -0.73501 | -0.53715 | -0.20351 | 0.13781  | 0.28362  | 0.19091  | 0.6448   | 0.64004  | 0.74893  | 0.62269  | 0.49726  | 0.48034  | 0.23558  | -0.04951 | -0.35932 | -0.47407 | -0.44757 | -0.68328 | -0.87062 |
| PFL1930w   | -0.94621 | -1.11723 | -1.02925 | -1.32638 | -1.1602  | -1.02855 | -0.79903 | -0.99408 | -0.48857 | -0.17773 | -0.30929 | -0.14837 | 0.24731  | 0.70809  | 0.61929  | 0.47671  | 0.78539  | 0.4945   | -0.43053 | 0.06658  | -0.06123 | -0.24658 | -0.57516 | -0.9195  |
| MAL8P1.130 | 0.09391  | 0.06865  | 0.32173  | 0.61346  | 1.02353  | 1.52581  | 1.57844  | 1.55984  | 1.48386  | 1.15654  | 1.05023  | 0.90071  | 0.71016  | 0.61137  | 0.42476  | 0.30409  | -0.34035 | 0.01734  | -0.09422 | -0.23984 | -0.49063 | -0.46824 | -0.3853  | -0.33133 |
| MAL8P1.110 | 0.34078  | 0.24904  | -0.0466  | 0.09122  | 0.19701  | -0.0749  | -0.07227 | -0.03495 | -0.13373 | 0.06002  | -0.13563 | -0.21778 | -0.15668 | -0.11394 | -0.14768 | -0.08402 | 0.22002  | 0.34534  | 0.27745  | 0.27263  | 0.59873  | 0.25298  | 0.27973  | 0.06327  |
| PFC0530w   | -0.28049 | -0.08627 | 0.1537   | 0.38824  | 0.4462   | 0.63271  | 0.79755  | 1.04882  | 1.22203  | 1.26296  | 1.35541  | 0.96538  | 0.52628  | 0.27931  | -0.05888 | -0.19945 | -0.40258 | -0.40253 | -0.35373 | -0.69165 | -0.68119 | -0.6977  | -0.62219 | -0.49839 |
| MAL13P1.51 | 0.49992  | 0.15     | -0.27762 | -0.28946 | -0.55673 | -0.68679 | -0.60348 | -0.31169 | -0.61275 | -0.74262 | -0.80796 | -1.00394 | -0.91526 | -0.97054 | -0.55953 | 0.15079  | 0.62981  | 0.48548  | 1.26358  | 1.09728  | 0.96527  | 0.52969  | 0.57744  | 0.33748  |
| PFE0600c   | -0.74031 | -0.34396 | -0.36521 | -0.13863 | -0.14497 | -0.03181 | -0.22339 | 0.7593   | 0.92504  | 0.79726  | 1.00789  | 0.93555  | 0.99886  | 0.65768  | 0.59229  | 0.43584  | -0.16276 | 0.13986  | 0.09306  | -0.35311 | -0.39934 | -0.54628 | -0.4882  | -0.45479 |
| PFL1695c   | 0.42133  | 0.50063  | 0.24458  | -0.02673 | -0.08171 | -0.10195 | -0.19508 | -0.29333 | -0.74416 | -0.90873 | -0.6464  | -0.45941 | -0.28323 | -0.14475 | 0.30072  | 0.56708  | 0.62452  | 0.83555  | 1.29369  | 0.73067  | 0.78362  | 0.51443  | 0.46459  | 0.34574  |
| PF0710w    | 0.58787  | 0.15772  | -0.05958 | -0.11034 | -0.23508 | -0.40172 | -0.66481 | -0.63593 | -1.15976 | -1.33808 | -1.3655  | -1.57813 | -1.4917  | -1.67522 | -1.15193 | -0.34768 | 0.58839  | 0.5554   | 1.32468  | 1.07519  | 1.13834  | 0.77844  | 1.05832  | 0.76408  |
| PF11490c   | -0.2561  | 0.10548  | 0.37618  | 0.24982  | 0.21506  | 0.22259  | 0.35369  | 0.3114   | 0.31194  | 0.24439  | 0.31434  | 0.40675  | 0.43657  | 0.39442  | 0.33335  | 0.09622  | 0.07049  | 0.00668  | -0.45282 | -0.43826 | -0.57337 | -0.34216 | -0.31569 | -0.10959 |
| PFI0635c   | 0.38085  | 0.59195  | 0.52391  | 0.73646  | 0.62833  | 0.89878  | 0.8803   | 1.0984   | 0.91867  | 0.73681  | 0.92619  | 0.74636  | 0.3548   | -0.00923 | -0.04498 | -0.31634 | -0.7239  | -0.7545  | -0.39397 | -0.52851 | -0.2406  | -0.14406 | 0.29502  | 0.54187  |
| PF13_0091  | -0.01589 | 0.06384  | -0.00304 | -0.07034 | 0.01078  | 0.20408  | 0.1796   | 0.3577   | 0.35639  | 0.47982  | 0.44864  | 0.52579  | 0.30966  | 0.20344  | 0.21455  | -0.04622 | -0.34228 | -0.2448  | -0.37143 | -0.78634 | -0.69799 | -0.19143 | -0.23    |          |

|               |          |          |          |          |          |          |          |          |          |          |          |          |          |          |          |          |          |          |          |          |          |          |          |          |
|---------------|----------|----------|----------|----------|----------|----------|----------|----------|----------|----------|----------|----------|----------|----------|----------|----------|----------|----------|----------|----------|----------|----------|----------|----------|
| MAL13P1.78    | -0.34697 | -0.64333 | -0.2862  | -0.4697  | -0.15498 | 0.32893  | 0.62307  | 0.60707  | 1.18452  | 1.10476  | 0.93873  | 0.93642  | 0.78718  | 0.57485  | 0.23287  | 0.11665  | 0.05366  | 0.06648  | -0.13047 | -0.08121 | -0.13526 | -0.29782 | -0.31254 | -0.34357 |
| MAL7P1.87     | -0.0759  | -0.49161 | -0.68255 | -0.80549 | -1.04229 | -1.18472 | -1.34584 | -1.47481 | -1.71318 | -1.65308 | -1.40341 | -1.09269 | -0.84935 | -0.40448 | 0.18696  | 0.67055  | 0.79478  | 1.03436  | 0.58393  | 0.54287  | 0.2936   | 0.44796  | 0.11494  | -0.42225 |
| PF11 0214     | 0.14121  | 0.26121  | 0.43774  | 0.48339  | 0.60884  | 0.56269  | 0.50627  | 0.47561  | 0.3275   | 0.21172  | 0.03019  | 0.03701  | 0.18495  | 0.18918  | 0.14324  | 0.05957  | 0.20855  | 0.12299  | -0.27208 | 0.1439   | 0.58296  | 0.32232  | 0.45655  | 0.45507  |
| MAL7P1.155    | -0.37333 | -0.30334 | -0.45613 | -0.43646 | -0.57407 | -0.69406 | -0.5798  | -0.69338 | -1.0348  | -0.9748  | -1.08362 | -0.85465 | -0.2671  | 0.41882  | 0.66271  | 0.77306  | 0.83416  | 0.77014  | 0.039    | 0.43645  | 0.29298  | 0.2147   | 0.02497  | -0.21882 |
| PF14 0104     | -0.12677 | 0.24418  | 0.26436  | 0.46091  | 0.36817  | 0.38545  | 0.36712  | 0.49217  | 0.40729  | 0.41122  | 0.6117   | 0.69994  | 0.59516  | 0.39158  | 0.41714  | 0.08294  | -0.28853 | -0.35704 | -0.69626 | -0.87388 | -0.89813 | -0.67235 | -0.57111 | -0.3252  |
| PF14 0364     | 0.40467  | 0.84855  | -0.5477  | 0.96939  | 0.94869  | 0.8137   | 0.72528  | 0.93223  | 0.80653  | 0.75807  | 0.81185  | 0.5498   | 0.38848  | 0.22765  | 0.23526  | -0.0398  | -0.20998 | -0.54936 | -0.35404 | -0.59448 | -0.38386 | -0.19657 | -0.13209 | 0.17497  |
| PFL0970w      | 0.30048  | 0.6167   | 0.44045  | 0.81722  | 0.72921  | 0.54078  | 0.51962  | 0.66568  | 0.55466  | 0.5108   | 0.48368  | 0.4685   | 0.44378  | 0.36491  | 0.38229  | 0.13662  | -0.09076 | 0.05253  | -0.07229 | -0.17825 | -0.25005 | -0.13636 | 0.04552  | 0.2485   |
| PF11 0470     | 0.33613  | -0.14593 | -0.51424 | -0.7006  | -0.60846 | -0.87261 | -0.97286 | -0.99839 | -1.15877 | -1.36238 | -1.25869 | -1.32987 | -1.16288 | -1.04765 | -0.52365 | 0.31621  | 0.62383  | 0.78658  | 1.05659  | 0.70465  | 0.80234  | 0.61603  | 0.35175  | -0.02712 |
| PF1760w       | -0.15899 | 0.17372  | 0.56998  | 0.85726  | 1.41699  | 1.7917   | 1.82896  | 1.60665  | 1.18532  | 0.63594  | 0.36083  | -0.41842 | -0.45441 | -0.64846 | -0.69195 | -0.70366 | -0.61708 | -0.47945 | -0.26852 | -0.36176 | -0.01611 | 0.03161  | 0.29915  | 0.91254  |
| MAL13P1.47    | -0.49907 | -0.35125 | -0.21021 | -0.42034 | -0.15227 | -0.20249 | -0.35287 | -0.37446 | -0.3412  | -0.14678 | 0.43777  | 0.24655  | 0.5035   | 0.3015   | 0.47231  | 0.47496  | 0.22165  | -0.01313 | 0.1427   | -0.05417 | 0.00464  | -0.17169 | -0.05831 | 0.09706  |
| MAL13P1.32    | 0.54273  | 0.82311  | 0.91241  | 0.84924  | 1.10497  | 1.06106  | 1.06427  | 0.83226  | 0.76843  | 0.59432  | 0.34796  | 0.30722  | 0.22054  | 0.20027  | -0.15215 | -0.23513 | -0.16652 | 0.1353   | -0.2683  | 0.29307  | 0.45471  | 0.5778   | 0.60077  | 0.56921  |
| PF11 0105     | 0.46888  | 0.59533  | 0.79933  | 1.0268   | 0.96653  | 1.00534  | 0.94035  | 1.06714  | 0.87478  | 0.64941  | 0.60878  | 0.52092  | 0.08922  | -0.30293 | -0.53394 | -0.74342 | -1.17088 | -1.11594 | -0.94175 | -0.80266 | -0.35819 | 0.04599  | 0.28544  | 0.48728  |
| PFF0255c      | -0.1717  | -0.21577 | 1.37141  | -0.25449 | -0.63587 | -0.23674 | -0.36032 | -0.27573 | -0.08898 | 0.04547  | 0.2686   | 0.55443  | 0.74095  | 0.67116  | 1.00801  | 1.05081  | 0.59925  | 0.70634  | 0.9656   | 0.27841  | -0.09921 | -0.07018 | 0.0843   | -0.13302 |
| PFD0669c      | -0.93939 | -0.46613 | -0.05454 | -0.15396 | 0.03416  | 0.44455  | 0.60703  | 0.84     | 0.60051  | 0.5014   | 0.68574  | 0.8324   | 0.74885  | 0.33999  | 0.48312  | 0.33051  | -0.20097 | -0.2201  | -0.14478 | -0.78634 | -0.11539 | -1.08966 | -1.1849  | -0.967   |
| PF13 0359     | -0.52763 | -0.84292 | -0.66512 | -0.88627 | -0.82145 | -0.69916 | -0.44079 | -0.14405 | 0.14758  | 0.31086  | 0.3666   | 0.61781  | 0.62974  | 0.78616  | 0.63486  | 0.55236  | 0.36511  | 0.61188  | 0.09164  | 0.20018  | -0.1543  | -0.34653 | -0.45296 | -0.62622 |
| PFL2525c      | 0.37584  | 0.34112  | 0.95861  | 0.48276  | 0.57958  | 0.72022  | 0.41381  | 0.20359  | 0.31917  | 0.55927  | 0.22361  | 0.38207  | 0.38251  | 0.27294  | 0.08663  | 0.03173  | -0.01852 | 0.17824  | 0.11532  | 0.33652  | 0.37404  | 0.4594   | 0.67781  | 0.89302  |
| PFB0870w      | -0.67164 | -0.75001 | -0.46957 | -0.27701 | -0.2971  | -0.00369 | 0.2594   | 0.3363   | 0.85607  | 0.89595  | 0.75208  | 0.65139  | 0.60687  | 0.46196  | 0.07358  | -0.22497 | -0.21633 | -0.41642 | -0.03464 | -0.05429 | -0.31375 | -0.34682 | -0.16786 | -0.30569 |
| PF08 0115     | 0.49325  | 0.27683  | -0.02933 | -0.06871 | 0.00227  | -0.27231 | -0.34323 | -0.18764 | -0.38978 | -0.46585 | -0.56757 | -0.63195 | -0.7563  | -0.9024  | -0.85193 | -0.79515 | -0.5442  | -0.57669 | 0.71216  | 0.4899   | 0.73368  | 0.62153  | 0.73336  | 0.89562  |
| PF14 0566     | 0.50314  | 0.36935  | 0.18732  | 0.27426  | 0.16499  | 0.06487  | -0.07119 | -0.54309 | -0.73332 | -0.78932 | -0.66089 | -0.25544 | -0.25511 | 0.0162   | 0.47376  | 0.74276  | 0.72072  | 0.51014  | 0.63522  | 0.67979  | 0.42749  | 0.1879   | 0.30253  | 0.33543  |
| PF11 0400     | 0.37727  | 0.39889  | 0.43341  | 0.56835  | 0.58976  | 0.45782  | 0.45585  | 0.25504  | 0.28222  | 0.25508  | 0.08354  | 0.06589  | 0.17081  | 0.32023  | 0.15332  | 0.00215  | -0.07961 | 0.02351  | -0.43212 | -0.12053 | 0.02206  | -0.01469 | -0.00243 | 0.07246  |
| PF1375w       | -0.35431 | -0.74928 | -0.85173 | -1.05983 | -1.29283 | -1.3531  | -1.47298 | -1.57073 | -1.78305 | -1.61323 | -1.21589 | -1.17832 | -0.81605 | -0.58139 | 0.28098  | 0.59725  | 0.60975  | 0.53657  | 0.96818  | 0.40896  | 0.45922  | 0.07332  | 0.05943  | -0.12269 |
| PFA0130c      | -0.35704 | -0.46584 | -2.12708 | -0.22015 | 0.01002  | 1.4445   | 2.46502  | 2.81881  | 2.55296  | 1.89365  | 1.50442  | 0.71089  | 0.14189  | -0.26013 | -0.4921  | -0.49849 | -0.94071 | -0.85501 | -0.78443 | -0.84139 | -0.89076 | -0.37311 | -0.73873 | -0.71166 |
| PF14 0275     | 0.48932  | 0.63253  | 0.15459  | 0.61982  | 0.51154  | 0.70066  | 0.56273  | 0.64475  | 0.24035  | 0.15355  | 0.1678   | 0.22352  | 0.04069  | 0.23382  | 0.27436  | 0.33821  | -0.23208 | 0.25276  | 0.61263  | 0.07185  | 0.30317  | 0.51911  | 0.44557  | 0.27365  |
| PFE1315w      | 0.09844  | -0.06667 | -0.12605 | -0.13483 | -0.17409 | -0.24857 | -0.06557 | -0.28449 | -0.3608  | -0.24891 | -0.07806 | -0.09236 | 0.01118  | 0.48261  | 0.75514  | 0.25976  | 0.79311  | 1.12679  | 0.75297  | 0.38847  | 0.06841  | -0.02598 | 0.01648  |          |
| PF13 0148     | -0.66917 | -0.77171 | -0.77269 | -1.0104  | -1.1374  | -1.21408 | -1.09347 | -1.06578 | -0.44    | 0.06154  | 0.25129  | -0.44636 | 0.72347  | 0.96315  | 0.63021  | 0.46602  | 0.59562  | 0.3789   | 0.32455  | -0.04388 | -0.16662 | -0.3141  | -0.57368 | -0.76863 |
| PFE0930w      | -0.26073 | -0.18321 | -0.3775  | -0.33137 | -0.2712  | -0.22935 | -0.35165 | -0.56842 | -0.69623 | -0.48341 | -0.20245 | -0.10391 | 0.27465  | 0.36698  | 0.62934  | 0.67084  | 0.71625  | 0.61391  | 0.57336  | 0.4652   | 0.36771  | 0.21691  | 0.18987  | 0.04008  |
| PF11 0205     | 0.67991  | 0.92593  | 0.95126  | 0.67414  | 0.5847   | 0.63983  | 0.50446  | 0.48952  | 0.52122  | 0.25852  | 0.33473  | 0.09659  | -0.34443 | -0.4701  | -0.32467 | -0.17639 | -0.49268 | 0.01428  | 0.04724  | -0.01223 | 0.05073  | 0.15056  | 0.15706  | 0.04387  |
| MAL13P1.380   | 0.31086  | -0.07463 | -0.38642 | -0.50118 | -0.55886 | -0.76461 | -0.81127 | -1.19805 | -1.49308 | -1.59514 | -1.83863 | -2.00757 | -1.90141 | -1.5014  | -0.91061 | 0.01005  | 1.04824  | 0.68837  | 0.66755  | 1.05566  | 1.1969   | 0.98918  | 0.71293  | 0.22269  |
| PF14 0383     | -0.01587 | -0.28058 | -0.63561 | -0.97981 | -1.30031 | -1.46447 | -1.62216 | -1.73914 | -1.8532  | -2.01648 | -1.8717  | -1.93845 | -1.60916 | -1.83184 | -1.4108  | 0.79383  | 1.13146  | 1.057    | 0.97368  | 1.19884  | 1.18238  | 0.48422  | 0.22757  | -0.47022 |
| MAL13P1.90    | -0.91148 | -0.51287 | 0.16545  | 0.53656  | 0.60603  | 0.62244  | 0.46863  | 0.26284  | 0.13405  | 0.17496  | 0.31382  | 0.39042  | 0.517    | 0.54665  | 0.57943  | 0.41378  | 0.34266  | 0.26286  | -0.0034  | -0.21041 | -0.63752 | -0.85282 | -0.92721 | -0.79353 |
| PF10 0166     | 0.18826  | -0.47077 | -0.24472 | -0.98009 | -1.40748 | -1.75528 | -2.09499 | -2.34219 | -2.49112 | -2.27578 | -2.11238 | -1.90164 | -1.98438 | -1.889   | -0.88923 | 0.0667   | 0.52616  | 0.71084  | 1.37667  | 1.14192  | 1.11054  | 0.62121  | 0.59197  | -0.00963 |
| PFC0571c      | -0.67199 | -0.9636  | -0.87022 | -1.16039 | -1.32561 | -1.3449  | -1.23241 | -0.86381 | -0.19455 | 0.02982  | 0.18148  | 0.38931  | 0.68634  | 0.78197  | 0.72816  | 0.62014  | 0.44412  | 0.42406  | 0.22989  | -0.00887 | -0.30187 | -0.53149 | -0.7721  | -0.78936 |
| PF14 0649     | -0.5243  | -0.37359 | 0.17407  | -0.15766 | -0.096   | 0.20325  | 0.23698  | -0.17188 | 0.07894  | 0.13551  | -0.01688 | -0.05675 | -0.08034 | 0.16223  | 0.28634  | 0.415    | 0.55566  | 0.26611  | -0.48009 | -0.29153 | -0.41995 | -0.45965 | -0.65722 | -0.76895 |
| PFI0215c      | -0.67882 | -0.76766 | -1.14529 | -0.94458 | -0.98008 | -0.78686 | -0.7781  | -0.87143 | -0.82245 | -0.58235 | -0.16024 | 0.08498  | 0.35491  | 0.46046  | 0.93826  | 0.96639  | 0.70228  | 0.36211  | 0.67578  | 0.00584  | -0.06594 | -0.22971 | -0.56429 | -0.65031 |
| MAL8P1.145    | 0.01222  | 0.00418  | -0.21898 | -0.55573 | -0.69675 | -0.72658 | -0.70743 | -0.57706 | -0.34473 | -0.32769 | -0.24948 | -0.17054 | -0.06144 | 0.46843  | 0.82313  | 0.99531  | 0.80951  | 1.01374  | 0.79753  | 0.64629  | 0.23884  | 0.16344  | -0.02891 |          |
| PFI0670w      | -0.81522 | -0.88576 | -0.63167 | -0.615   | -0.6817  | -0.38874 | -0.33979 | -0.14362 | 0.05538  | 0.13745  | 0.21808  | 0.50847  | 0.56457  | 0.61474  | 0.65887  | 0.46959  | 0.33001  | -0.18718 | 0.18652  | -0.15517 | -0.31445 | -0.39243 | -0.49649 | -0.72049 |
| PFL0035c      | 1.58314  | 1.60649  | 1.52732  | 1.57151  | 1.48174  | 1.12694  | 0.50394  | 0.16864  | -0.29558 | -0.92568 | -1.19504 | -1.50463 | -1.71227 | -2.10924 | -1.812   | -1.85269 | -1.81567 | -1.35429 | -0.66369 | -0.29552 | 0.24687  | 0.7127   | 0.88056  | 0.99943  |
| PF10 0111     | -0.88873 | -0.94929 | -0.88961 | -0.77631 | -0.9594  | -0.56239 | -0.5468  | -0.40524 | -0.28448 | -0.28747 | 0.08999  | 0.4232   | 0.35372  | 0.39908  | 0.59496  | 0.69453  | 0.21411  | 0.39189  | 0.24065  | -0.54467 | -0.64647 | -0.77756 | -0.92763 | -1.02576 |
| PFC0375c      | 0.36709  | 0.48121  | 0.50108  | 0.98442  | 1.06353  | 1.02373  | 0.77944  | 0.89898  | 0.76377  | 0.72107  | 0.60554  | 0.4388   | 0.42712  | 0.29682  | 0.05503  | -0.12623 | -0.29873 | -0.22607 | -0.52202 | -0.577   | -0.55655 | -0.30703 | -0.21392 | 0.03027  |
| PFC10 API0059 | -0.67136 | -1.21488 | -1.44689 | -2.03585 | -1.0897  | -1.64987 | -1.96642 | -1.35087 | -1.59193 | -0.88931 | -0.99366 | -0.74915 | -0.70659 | -0.14418 | 0.06868  | 0.61277  | 0.60058  | 1.33144  | -0.30534 | 0.45419  | 0.39469  | 0.60207  | -0.13911 | -0.04484 |
| MAL13P1.225   | 0.89261  | 0.60104  | 0.73367  | 0.78446  | 0.85371  | 1.03822  | 0.91335  | 0.88095  | 0.83466  | 0.54531  | 0.58917  | 0.42807  | 0.00658  | -0.44459 | -0.76285 | -1.0251  | -1.84613 | -1.2397  | 0.00725  | 0.12056  | 0.3406   |          |          |          |

|              |          |          |          |          |          |          |          |          |          |          |          |          |          |          |          |          |          |          |          |          |          |          |          |          |
|--------------|----------|----------|----------|----------|----------|----------|----------|----------|----------|----------|----------|----------|----------|----------|----------|----------|----------|----------|----------|----------|----------|----------|----------|----------|
| PFL0295c     | -0.36583 | -0.10468 | -0.10454 | 0.10566  | 0.29372  | 0.36256  | 0.5427   | 0.61557  | 0.47189  | 0.30475  | 0.28385  | 0.04343  | 0.07451  | -0.00789 | 0.15923  | 0.11105  | 0.26449  | -0.1467  | 0.24507  | -0.12543 | -0.16038 | -0.00138 | -0.08124 | -0.19539 |
| PF0695w      | -0.54094 | 0.10926  | 0.56056  | 0.73553  | 0.79292  | 1.26147  | 1.1023   | 0.87309  | 0.53159  | 0.2076   | 0.20992  | 0.19762  | 0.0597   | -0.33816 | -0.37788 | -0.42508 | -0.61918 | -0.59952 | -0.20625 | -0.57736 | -0.65903 | -0.63025 | -0.33244 | -0.14131 |
| MAL13_tRNA_M |          |          |          |          |          |          |          |          |          |          |          |          |          |          |          |          |          |          |          |          |          |          |          |          |
| et1          | -0.02717 | 0.55028  | -0.21891 | -0.69049 | -0.85935 | -0.24518 | -0.86823 | -0.25602 | -0.74695 | -0.63752 | -0.1386  | -0.34299 | -0.21356 | -0.24769 | 0.26074  | -0.0741  | -0.91031 | 0.74851  | 0.92571  | 0.19911  | 0.60528  | 1.06703  | 0.79463  | 0.50621  |
| PF10_0370    | 0.80854  | 1.42004  | 1.13731  | 1.67253  | 1.45253  | 1.59715  | 1.40932  | 1.53602  | 1.2422   | 0.61585  | 0.63317  | 0.56744  | 0.25881  | 0.16055  | 0.14794  | -0.10616 | -0.30409 | -0.55383 | -0.61302 | -0.91924 | -0.87038 | -0.59677 | -0.38286 | -0.09338 |
| PF0847w      | 1.48985  | 1.4025   | 0.59756  | 0.77034  | 0.36875  | 0.47351  | 0.84929  | 1.51529  | 0.80822  | 0.46607  | 0.40956  | 0.23047  | 0.19714  | 0.08832  | 0.27955  | 0.32399  | 0.41435  | 0.38401  | 0.54067  | -0.20698 | 0.0542   | 0.38253  | -0.34758 | -0.30876 |
| PF14_0487    | 0.37241  | 0.69611  | 0.67156  | 0.6214   | 0.54642  | 0.30022  | 0.20113  | -0.11682 | -0.22823 | -0.34563 | -0.31852 | -0.26966 | -0.08265 | 0.00698  | -0.0205  | -0.28489 | -0.39043 | -0.68467 | -0.94366 | -0.41249 | -0.03422 | 0.11258  | 0.38372  | 0.33496  |
| PF11_0409    | 0.07781  | 0.27719  | 0.51631  | 0.44363  | 0.57624  | 0.74991  | 0.73886  | 0.80567  | 0.42086  | 0.22795  | 0.56592  | 0.5037   | 0.58132  | 0.35418  | 0.5076   | 0.20816  | -0.3179  | -0.1171  | -0.38109 | -0.90107 | -0.88339 | -0.66081 | -0.47705 | -0.14557 |
| PFB0215c     | 0.14782  | 0.51716  | 0.01338  | 0.35472  | 0.04933  | 0.35116  | -0.02395 | 0.41294  | 0.25751  | 0.10064  | 0.39237  | 0.33946  | 0.33517  | -0.02239 | 0.15673  | 0.08055  | 0.01781  | 0.04502  | -0.03748 | -0.46531 | -0.35191 | -0.30525 | -0.56036 | -0.35967 |
| PFA0530c     | -0.32755 | 0.17495  | 0.63908  | 0.34662  | 0.38742  | 0.6935   | 0.78753  | 1.02745  | 1.00515  | 0.96223  | 1.04922  | 1.038    | 0.75084  | 0.07105  | -0.10951 | -0.418   | -0.83228 | -0.99991 | -0.637   | -1.14707 | -1.26911 | -0.93601 | -0.63569 | -0.17072 |
| PF14_0146    | 0.15782  | 0.3413   | -0.22895 | 0.7522   | 0.4843   | 0.83656  | 0.73403  | 0.81757  | 1.06903  | 0.49911  | 0.81292  | 0.85812  | 0.63376  | 0.34263  | 0.22588  | 0.18198  | -0.36984 | -0.41876 | 0.00246  | -0.72188 | -0.68668 | -0.54124 | -0.255   | -0.24006 |
| PF14_0033    | -0.37495 | -0.31891 | -0.0419  | -0.65006 | -0.78046 | -1.2803  | -1.08149 | -1.30161 | -1.11728 | -1.66757 | -1.33989 | -1.29071 | -0.72065 | -0.53663 | 0.10758  | 0.13841  | 0.21544  | 0.1452   | 0.8158   | 0.30857  | 0.49155  | 0.06674  | 0.21147  | 0.19853  |
| MAL7P1.127   | 0.00888  | -0.12722 | -0.36946 | -0.35108 | -0.15704 | -0.42232 | -0.29765 | 0.05309  | 0.10275  | 0.00185  | 0.03415  | 0.03119  | -0.01883 | 0.26226  | 0.32433  | 0.50052  | 0.33432  | 0.61266  | 0.2096   | 0.51778  | 0.34854  | 0.01549  | -0.2356  | -0.18742 |
| PF14_0712    | 0.18452  | -0.09386 | 1.23622  | 0.49255  | 0.34756  | 0.32437  | 0.30528  | 0.1514   | 0.06183  | 0.04311  | 0.14882  | 0.36556  | 0.44781  | 0.59616  | 0.46681  | 0.38023  | 0.32159  | 0.32563  | -0.11595 | 0.18598  | 0.16337  | 0.12684  | 0.28658  | 0.23318  |
| PF14_0082    | -0.00613 | 0.39693  | 0.61564  | 0.52874  | 0.40824  | 0.49318  | 0.3902   | 0.42857  | 0.58665  | 0.55492  | 0.50526  | 0.55541  | 0.15877  | -0.25836 | -0.32291 | -0.70628 | -0.6184  | -1.09049 | -0.81641 | -0.94649 | -0.86132 | -0.61569 | -0.39249 | -0.0788  |
| PF08_0029    | -1.02292 | -0.98429 | -0.34544 | -0.85258 | -0.54961 | 0.24431  | 0.57587  | 0.94113  | 1.28739  | 1.11485  | 1.20047  | 1.12281  | 0.93061  | 0.5615   | 0.65319  | 0.34493  | 0.04027  | -0.33757 | -0.33513 | -0.75015 | -0.83846 | -0.86514 | -0.8555  | -0.75332 |
| PFL2285c     | 0.56565  | -0.03762 | -0.14064 | -0.0915  | -0.25567 | -0.44625 | -0.5378  | -0.54687 | -0.80328 | -0.74161 | -0.15998 | -0.33749 | -0.4895  | -0.5544  | -0.3688  | -0.07007 | 0.37388  | 0.36044  | 1.20276  | 0.9537   | 0.55115  | 0.57195  | 0.83926  | 0.73997  |
| PFE1615c     | -1.37876 | -2.10278 | -1.1738  | -1.73556 | -1.0556  | 1.16303  | 2.37423  | 2.84164  | 2.8805   | 2.40169  | 1.95631  | 1.13478  | 0.58783  | -0.12118 | -0.58783 | -1.01139 | -1.78138 | -1.40058 | -1.25375 | -1.69771 | -2.0801  | -2.05627 | -1.78598 | -1.41023 |
| PF10_0158    | 0.68426  | 0.53393  | 0.70586  | 0.61221  | 0.64877  | 0.54523  | 0.68722  | 0.72839  | 0.79048  | 0.70843  | 0.70175  | 0.73072  | 0.24692  | 0.06809  | -0.25955 | -0.38795 | -0.65495 | -0.46333 | 0.27888  | 0.09557  | 0.04773  | 0.17026  | 0.40295  | 0.80631  |
| PFE0335w     | -0.01804 | 0.01135  | 0.2854   | 0.29861  | 0.35559  | 0.51574  | 0.4608   | 0.28064  | 0.36465  | 0.32443  | 0.13612  | 0.411    | 0.24652  | 0.27955  | -0.02686 | -0.11113 | -0.26244 | -0.29905 | -0.60806 | -0.35768 | -0.38221 | -0.20585 | -0.17925 | -0.08996 |
| PFL2420w     | 0.14332  | 0.41367  | 0.30292  | 0.43926  | 0.59838  | 0.68685  | 0.5633   | 0.37721  | 0.05322  | -0.21566 | -0.3757  | -0.45856 | -0.60791 | -0.29271 | 0.05004  | 0.18774  | 0.41915  | 0.54689  | 0.45499  | 0.71028  | 0.83456  | 0.86205  | 1.03251  | 1.02904  |
| MAL7P1.118   | 0.43638  | 0.75084  | 0.87835  | 1.15765  | 1.12626  | 1.39077  | 1.13973  | 0.74798  | 0.44417  | 0.18401  | 0.2475   | 0.36879  | 0.3872   | 0.30375  | 0.52971  | 0.51083  | 0.14524  | 0.18958  | 0.47392  | 0.1218   | 0.14422  | -0.206   | -0.0809  | 0.13338  |
| PF14_0204    | 1.32803  | 1.09949  | 0.99215  | 0.67056  | 0.66382  | 0.09051  | -0.13941 | -0.33667 | -0.49628 | -0.52776 | -0.54838 | -0.58984 | -0.56479 | -0.56623 | -0.45458 | -0.21502 | 0.13983  | -0.01608 | 0.48236  | 0.80212  | 1.08262  | 0.71037  | 1.07892  | 1.07944  |
| PF11_0368    | -0.35249 | -0.35133 | -0.22457 | -0.51996 | -0.51098 | -0.51827 | -0.49125 | -0.56373 | -0.09912 | 0.29764  | 0.44644  | 0.62659  | 0.72574  | 0.70002  | 0.44732  | 0.38798  | 0.29228  | 0.32385  | -0.1655  | -0.04462 | -0.20006 | -0.07675 | -0.19348 | -0.16098 |
| PF08_0069    | -0.24233 | -0.15583 | -1.35814 | 0.22214  | 0.19528  | 0.37094  | 0.92979  | 0.64981  | 0.66688  | 0.61824  | 0.64766  | 0.61299  | 0.54956  | 0.39233  | 0.1708   | 0.02754  | -0.39828 | -0.39831 | -0.43122 | -0.57735 | -0.53832 | -0.20608 | -0.07471 | -0.05549 |
| PFL1560c     | 0.26966  | 0.24105  | 0.08153  | -0.03469 | -0.10752 | -0.2785  | -0.30627 | -0.20864 | -0.91994 | -0.66918 | -0.66023 | -0.64296 | -0.63629 | -0.80171 | -0.46257 | -0.5798  | -0.69818 | -0.73255 | 0.57553  | 0.41669  | 0.53578  | 0.51634  | 0.60807  | 0.82556  |
| PF1025w      | 0.07414  | 0.33009  | 0.37613  | 0.45244  | 0.32966  | 0.38666  | 0.28502  | 0.32572  | 0.29498  | 0.34033  | 0.52853  | 0.68102  | 0.59453  | 0.39159  | 0.47941  | 0.28305  | -0.26259 | 0.05146  | 0.02756  | -0.38462 | -0.30492 | -0.20988 | -0.09004 | -0.06385 |
| PFL2350c     | 0.13837  | 0.06897  | 0.66813  | 1.14047  | 1.22553  | 1.74382  | 1.79849  | 1.72648  | 1.75309  | 1.43663  | 1.07204  | 0.97581  | 0.66634  | 0.37936  | -0.01281 | -0.14635 | -0.63028 | -0.36342 | -0.55962 | -0.36602 | -0.45396 | -0.19344 | -0.03202 | 0.12265  |
| MAL7P1.26    | 0.73938  | 0.83769  | 0.95459  | 1.5556   | 1.43397  | 1.52163  | 1.32927  | 1.015    | 0.91086  | 0.92022  | 0.9252   | 0.7587   | 0.59032  | 0.34222  | 0.13471  | -0.14173 | -0.26699 | -0.44402 | -0.27832 | -0.55986 | -0.43029 | -0.09806 | -0.26232 | 0.69022  |
| PFI0365w     | 0.46819  | 0.72721  | 0.73107  | 0.81115  | 0.77016  | 0.77043  | 0.53936  | 0.31635  | 0.20859  | 0.36016  | 0.36039  | 0.22072  | 0.11724  | -0.06772 | -0.27259 | -0.38849 | -0.30937 | -0.46005 | -0.15153 | -0.04909 | 0.10035  | 0.29386  | 0.4925   | 0.42985  |
| PF14_0690    | 0.31546  | 0.7007   | 0.69217  | 0.52933  | 0.35932  | 0.35004  | 0.4451   | 0.08956  | 0.25779  | 0.20636  | -0.00077 | -0.06273 | -0.04845 | -0.00463 | -0.25821 | -0.46021 | -0.31068 | -0.56044 | -1.06409 | -0.52535 | -0.23674 | 0.14918  | 0.21728  | 0.33281  |
| PF14_0360    | 0.40593  | 0.42967  | 0.62598  | 0.93597  | 0.98391  | 0.76988  | 0.81975  | 0.87363  | 0.60993  | 0.66517  | 0.5849   | 0.48954  | 0.25629  | 0.15187  | -0.06727 | -0.26901 | -0.55052 | -0.46502 | -0.54787 | -0.57192 | -0.55164 | -0.24935 | -0.61815 | 0.19115  |
| MAL13P1.151  | -0.76529 | -1.01058 | -0.96206 | -1.21993 | -1.24267 | -1.17311 | -1.22713 | -1.31977 | -0.91708 | -0.44998 | -0.36221 | -0.01113 | 0.50298  | 0.76886  | 0.8573   | 0.68594  | 0.66877  | 0.54112  | 0.04659  | 0.12088  | -0.24674 | -0.4535  | -0.66559 | -0.79939 |
| PF11_0242    | 0.09765  | 0.26365  | 0.17925  | 0.10682  | -0.13355 | -0.18248 | -0.1386  | -0.40304 | -0.43228 | -0.5623  | -0.96108 | -1.0917  | -0.89451 | -0.61998 | -0.58109 | -0.18392 | 0.36257  | 0.40624  | -0.31659 | 0.25532  | 0.39402  | 0.46608  | 0.27684  | 0.00868  |
| PFF0450c     | 0.85654  | 0.90762  | 0.72472  | 0.98834  | 0.94364  | 0.83282  | 0.68153  | 0.71864  | 0.22296  | 0.02092  | 0.07904  | -0.11478 | -0.15382 | -0.11193 | -0.08681 | -0.0656  | -0.10087 | -0.04846 | 0.25713  | -0.03102 | -0.04749 | 0.10061  | 0.21061  | 0.37268  |
| PF14_0602    | -0.92202 | -1.11448 | -1.70717 | -1.3506  | -1.33421 | -1.34879 | -1.29043 | -1.22387 | -0.40562 | -0.48302 | -0.58017 | 0.78179  | 0.87933  | 0.69373  | 0.73095  | 0.64344  | 0.31411  | 0.15172  | 0.15147  | -0.05744 | -0.53243 | -0.58403 | -0.65038 | -0.83562 |
| PF14_0196    | 0.34037  | -0.05311 | -0.27067 | -0.14508 | -0.15997 | -0.19421 | -0.28638 | -0.26464 | -0.48645 | -0.55177 | -0.4695  | -0.66746 | -0.5586  | -0.49914 | -0.26229 | -0.01559 | 0.19032  | 0.1907   | 1.12997  | 0.71101  | 0.76075  | 0.55113  | 0.72524  | 0.62458  |
| PF01007w     | -0.02897 | 0.62912  | -1.34186 | 1.19511  | 1.43672  | 1.60265  | 1.32303  | 1.28907  | 0.36805  | 0.23166  | 0.47393  | -0.0347  | -0.10442 | -0.31844 | -0.28359 | -0.42227 | -0.22982 | -0.51237 | 0.41701  | 0.15882  | 0.60277  | 0.45461  | 1.21212  | 1.49627  |
| MAL13P1.20   | 0.20665  | 0.19756  | 0.00685  | 0.28685  | 0.43134  | 0.47142  | 0.59365  | 0.37982  | 0.27402  | 0.24166  | 0.25308  | 0.09272  | 0.06621  | -0.00142 | 0.19906  | 0.26131  | 0.56143  | 0.36838  | 0.76947  | 0.30969  | 0.38541  | 0.4484   | 0.10748  | 0.05093  |
| PF14_0504    | 0.31945  | 0.33264  | 0.02068  | 0.54274  | 0.43563  | 0.50086  | 0.70922  | 0.78204  | 0.69227  | 0.56895  | 0.51884  | 0.37246  | 0.50384  | 0.43465  | 0.32085  | 0.32951  | 0.18616  | 0.09829  | 0.00342  | -0.18415 | -0.39236 | -0.42829 | -0.34745 | -0.17121 |
| PFE0740c     | 0.15917  | -0.12072 | 0.2421   | 0.1275   | 0.45224  | 0.99279  | 1.03423  | 0.9458   | 0.7765   | 0.64913  | 0.48717  | 0.51198  | 0.59122  | 0.69734  | 0.61068  | 0.44049  | 0.45679  | 0.42046  | 0.05414  | -0.01341 | -0.35606 | -0.44578 | -0.55701 | -0.36323 |
| PF10_0115    | -0.80112 | -0.28208 | -0.36782 | -0.31683 | -0.37681 | -0.67855 | -0.5449  | -0.78442 | 0.12658  |          |          |          |          |          |          |          |          |          |          |          |          |          |          |          |

|             |          |          |          |          |          |          |          |          |          |          |          |          |          |          |          |          |          |          |          |          |          |          |          |          |
|-------------|----------|----------|----------|----------|----------|----------|----------|----------|----------|----------|----------|----------|----------|----------|----------|----------|----------|----------|----------|----------|----------|----------|----------|----------|
| PFI0710c    | -0.23273 | -0.30568 | -0.18186 | -0.41833 | -0.32047 | -0.28606 | -0.27944 | -0.43546 | -0.45065 | -0.51234 | -0.35801 | -0.12938 | 0.15109  | 0.46106  | 0.46589  | 0.52559  | 0.60925  | 0.29353  | 0.10005  | 0.25896  | 0.18533  | 0.04033  | 0.00551  | -0.08884 |
| MAL13P1.21  | -0.50518 | -0.57735 | -0.64146 | -0.96724 | -1.07115 | -1.12793 | -1.26674 | -1.25161 | -0.98754 | -0.50732 | -0.1088  | 0.14776  | 0.44824  | 0.71337  | 0.71281  | 0.44968  | 0.55893  | 0.70377  | 0.44623  | 0.3109   | -0.05574 | -0.15475 | -0.38047 |          |
| PF10 0019   | -0.13954 | 0.63637  | 2.3958   | 2.36599  | 3.39301  | 3.39477  | 2.88826  | 2.45705  | -1.93449 | 0.13745  | -0.42559 | -1.68718 | -2.42728 | -3.50054 | -3.75621 | -4.73478 | -4.40266 | -5.05387 | -4.01452 | -3.24618 | -1.6727  | -0.98789 | -0.45302 | 0.06703  |
| PF14 0639   | 0.43544  | 0.69494  | 0.93666  | 0.97914  | 0.80096  | 1.0285   | 0.88531  | 0.84422  | 0.84537  | 0.68562  | 0.75877  | 0.86145  | 0.48751  | 0.42198  | 0.31875  | 0.09137  | 0.14008  | -0.04165 | -0.45221 | -0.62329 | -0.8469  | -0.46737 | -0.4965  | -0.12863 |
| PFC0290w    | -1.08133 | -0.23018 | 0.41465  | 0.11547  | 0.5095   | 0.93029  | 0.16222  | 0.2194   | 0.7941   | 0.80488  | 0.63009  | 0.77098  | 0.85157  | 0.43658  | 0.31195  | -0.0458  | -0.96163 | -0.30495 | -0.85552 | -1.85305 | -2.00148 | -1.22805 | -1.13396 | -0.8504  |
| PF07 0113   | -0.65818 | -0.84653 | -0.7872  | -1.24579 | -1.13904 | -0.91464 | -0.3662  | -0.0236  | 0.17735  | 0.24754  | 0.25577  | 0.45269  | 0.5523   | 0.78762  | 0.687    | 0.61115  | 0.37605  | 0.51307  | 0.1588   | 0.02289  | -0.36515 | -0.61348 | -0.74207 | -0.72878 |
| MAL7P1.167  | -0.01572 | -0.45182 | -1.04349 | -0.83192 | -1.01516 | -1.31996 | -1.41618 | -1.52833 | -1.55102 | -1.14137 | -1.22563 | -0.97141 | -0.56082 | 0.04381  | -0.05183 | 0.09079  | 0.50514  | 0.64268  | 0.27556  | 0.8265   | 0.70843  | 0.55141  | 0.4788   | 0.26017  |
| PF11 0290   | 1.31508  | 0.51702  | 0.02584  | -0.16624 | -0.35828 | -0.73823 | -0.62303 | -0.67982 | -1.00926 | -1.22461 | -1.3085  | -1.46889 | -1.92844 | -2.06474 | -2.07555 | -1.82683 | -1.2542  | -0.27453 | 1.38834  | 1.0266   | 1.33197  | 1.27622  | 1.34138  | 1.43149  |
| PFF0260w    | -0.06195 | 0.09345  | -0.24858 | 0.11267  | 0.13214  | 0.13665  | 0.01797  | -0.12289 | -0.37614 | -0.11645 | 0.14314  | 0.17588  | 0.37495  | 0.22931  | 0.57408  | 0.58344  | 0.39038  | 0.20045  | 0.66982  | 0.1979   | 0.1985   | -0.02176 | 0.10028  | 0.21001  |
| MAL13P1.236 | -0.7405  | -0.1852  | 0.28171  | 0.06263  | 0.25029  | 0.28404  | 0.20133  | 0.53751  | 0.54193  | 0.5806   | 0.80267  | 0.69714  | 0.61946  | 0.31014  | 0.51725  | 0.32181  | 0.19148  | -0.07887 | 0.09945  | -0.2729  | -0.45451 | -0.38414 | -0.29058 | -0.12512 |
| PFD0205c    | -0.25166 | -0.17332 | -0.13229 | -0.16135 | -0.21354 | -0.16223 | -0.18753 | -0.38359 | -0.56951 | -0.14091 | 0.32323  | 0.40419  | 0.54163  | 0.39925  | 0.48642  | 0.46523  | 0.52819  | 0.04186  | 0.42446  | 0.01322  | 0.04307  | -0.3561  | -0.1363  | 0.09092  |
| PFI0210c    | 0.15944  | -0.03815 | -0.50677 | 0.09344  | -0.06079 | -0.21142 | -0.28663 | -0.4303  | -0.23117 | -0.16611 | -0.0756  | -0.02126 | 0.125    | 0        | -0.05327 | 0.09841  | 0.33433  | 0.50562  | 0.08756  | 0.3793   | 0.10302  | 0.02888  | 0.17967  | 0.10347  |
| PF14 0542   | -0.47822 | 0.06861  | 0.56624  | 0.67606  | 0.78588  | 0.81905  | 0.63645  | 0.50868  | 0.27161  | 0.33272  | 0.34601  | 0.31117  | 0.35249  | 0.29381  | 0.38623  | 0.29429  | 0.0538   | -0.12363 | -0.2002  | -0.31526 | -0.41027 | -0.2729  | -0.25743 | -0.03368 |
| PFL1690w    | -0.44488 | -0.72086 | -0.2886  | -1.01054 | -0.55896 | -0.31119 | -0.17198 | 0.42808  | 1.04138  | 1.18905  | 1.29652  | 0.98738  | 0.36209  | 0.45946  | 0.2323   | 0.1926   | 0.1428   | -0.21296 | -0.00894 | -0.08339 | -0.19489 | -0.32823 | -0.49075 | -0.48426 |
| PFF0095c    | 0.14994  | 0.21723  | 0.04477  | 0.28344  | 0.39093  | 0.32097  | 0.29044  | 0.2521   | 0.09911  | 0.16926  | 0.24948  | 0.17806  | 0.25123  | 0.33986  | 0.11968  | 0.11837  | 0.11242  | 0.29904  | -0.22399 | 0.2379   | 0.33456  | 0.6525   | 0.65059  | 0.67414  |
| MAL13P1.341 | 0.50625  | 0.64041  | 0.77692  | 1.01703  | 0.70168  | 1.0712   | 0.72945  | 1.19834  | 1.12119  | 0.81806  | 1.02013  | 0.55895  | 0.52847  | -0.06756 | -0.04731 | -0.35068 | -0.63963 | -0.81266 | -0.44786 | -0.67825 | -0.41641 | 0.06426  | -0.24467 | 0.3884   |
| PF14 0646   | -0.34456 | -0.68315 | -0.33003 | -0.17315 | 0.19859  | 0.49052  | 0.50679  | 0.84716  | 0.37515  | 0.48026  | 0.71844  | 0.57825  | 0.54073  | 0.55148  | 0.65329  | 0.70039  | 0.11316  | 0.49101  | 0.77362  | 0.28766  | 0.09779  | -0.31304 | -0.16105 | -0.12735 |
| PFD0775c    | -0.53843 | -0.71503 | -0.37917 | -0.59494 | -0.575   | -0.31811 | -0.30477 | -0.43634 | -0.17701 | 0.00031  | 0.11914  | 0.22393  | 0.1972   | 0.19346  | 0.22328  | 0.30258  | 0.18591  | 0.30114  | 0.77267  | 0.09515  | -0.092   | 0.12568  | -0.04154 | -0.18045 |
| PF14 0267   | -0.35846 | -0.11596 | 0.26259  | 0.26259  | 0.32601  | 0.49643  | 0.45037  | 0.41309  | 0.32486  | 0.21445  | 0.25482  | 0.26379  | 0.32229  | 0.02009  | 0.20792  | 0.24506  | 0.10048  | 0.06699  | 0.2434   | -0.09748 | -0.37047 | -0.31626 | -0.27366 | -0.15638 |
| PF14 0317   | -0.89871 | -1.06468 | -0.99441 | -1.28927 | -1.1686  | -0.96434 | -0.54701 | -0.48627 | -0.28235 | -0.02869 | 0.47644  | 0.51384  | 0.80668  | 0.61124  | 0.92168  | 0.74309  | 0.33176  | 0.21767  | 0.49035  | -0.32427 | -0.67613 | -0.74607 | -0.84515 | -1.12083 |
| PFC0895w    | -0.36219 | 0.15383  | 0.30932  | 0.09672  | 0.10256  | 0.27006  | 0.13142  | -0.00931 | 0.2527   | 0.38537  | 0.57831  | 0.59965  | 0.25809  | 0.40018  | 0.12355  | 0.00421  | 0.04196  | -0.03341 | 0.05196  | 0.39923  | 0.367    | 0.2079   | 0.66411  | 0.70251  |
| PF14 0100   | 0.0313   | 0.422    | 0.0109   | 0.49727  | 0.67335  | 0.68894  | 0.80119  | 1.14     | 0.88533  | 1.0369   | 1.08928  | 0.55339  | 0.23524  | -0.17154 | -0.01701 | -0.20234 | -0.75124 | -0.61749 | 0.15813  | -0.65286 | -0.44502 | 0.19186  | -0.30063 | -0.07265 |
| PFC0800w    | -0.97202 | -0.73524 | -0.62175 | -0.31828 | 0.05315  | 0.77493  | 0.71898  | 1.02577  | 1.08483  | 0.90664  | 1.17972  | 0.96896  | 0.97837  | 0.57325  | 0.50367  | 0.22744  | -0.19644 | -0.24572 | -0.38231 | -0.73225 | -1.11532 | -1.0125  | -0.95937 | -0.96345 |
| PF07 0052   | 0.20487  | -0.13989 | -0.58648 | -0.52349 | -0.85505 | -1.09963 | -1.21625 | -1.39054 | -1.8894  | -2.03592 | -1.76714 | -1.58287 | -1.2664  | -1.33616 | -0.58199 | -0.00687 | 0.56591  | 0.4164   | 1.11929  | 0.90696  | 0.87615  | 0.61756  | 0.67087  | 0.49668  |
| PF10 0133   | -0.8734  | -0.97113 | -0.98721 | -1.1744  | -1.3269  | -1.47906 | -1.3357  | -1.19239 | -0.65368 | -0.13243 | 0.16958  | 0.45149  | 0.62206  | 0.73382  | 0.65908  | 0.60779  | 0.76266  | 0.43503  | 0.22109  | 0.20855  | 0.11576  | -0.13541 | -0.36002 | -0.6583  |
| PF13 0167   | -0.01255 | 0.42672  | 0.64353  | 0.58455  | 0.61955  | 0.38559  | 0.35489  | 0.50256  | 0.37403  | 0.3477   | 0.39713  | 0.3001   | 0.07755  | -0.0886  | -0.37417 | -0.17974 | -0.17613 | -0.21219 | -0.09537 | -0.35057 | -0.1523  | -0.17536 | -0.15356 | -0.08577 |
| PFI0780w    | -0.17465 | 0.07337  | 0.12344  | 0.10802  | 0.23395  | 0.16944  | 0.11579  | 0.2737   | -0.11972 | -0.08208 | 0.11453  | 0.04467  | 0.18459  | 0.04415  | 0.28478  | 0.14195  | 0.05368  | 0.21239  | 0.10105  | -0.34933 | -0.56731 | -0.86127 | -0.48338 | -0.25131 |
| PF10 0327   | 0.00908  | 0.42198  | 0.55242  | 0.52589  | 0.40546  | 0.38636  | 0.42117  | 0.53065  | 0.25749  | 0.49048  | 0.50372  | 0.49657  | 0.3377   | 0.16312  | 0.18055  | -0.16219 | -0.22276 | -0.38131 | -0.63224 | -0.76994 | -0.6806  | -0.18386 | -0.16067 | 0.06202  |
| PFD0590c    | -1.21813 | -1.37837 | -1.17151 | -1.58926 | -1.47014 | -1.64566 | -1.66937 | -1.78518 | -1.76521 | -0.91332 | -0.31787 | 0.07134  | 0.48866  | 0.82503  | 0.82997  | 0.71834  | 0.76432  | 0.33505  | -0.31262 | -0.20971 | -0.23103 | -0.4934  | -0.7132  | -0.85791 |
| PFE1480c    | -0.13711 | -0.30103 | -0.38671 | -0.66165 | -0.49991 | -0.19303 | 0.30585  | 0.64171  | 0.92307  | 1.01161  | 0.7729   | 0.84558  | 0.44022  | 0.27356  | -0.01058 | 0.00868  | -0.02775 | 0.2653   | 0.09351  | 0.38893  | 0.07918  | 0.25127  | 0.32476  | 0.20806  |
| PFL2405c    | -0.19798 | -0.60455 | -0.6338  | -0.34337 | -0.33616 | -0.42083 | -0.3308  | -0.18622 | 0.02477  | -0.15216 | -0.11557 | 0.07025  | 0.03354  | 0.09604  | -0.00574 | 0.03965  | -0.18109 | 0.36478  | 0.07764  | 0.50741  | 0.53501  | 1.01213  | 0.83128  | 0.72     |
| PFD0560w    | -0.43292 | -0.34818 | -0.36354 | -0.37489 | -0.53787 | -0.18943 | 0.06436  | 0.15269  | 0.4348   | 0.55603  | 0.5579   | 0.723    | 0.76385  | 0.72273  | 0.61933  | 0.39653  | 0.29934  | 0.13504  | -0.01398 | -0.22842 | -0.29513 | -0.23866 | -0.20407 | -0.39407 |
| PFF0125c    | 0.55354  | 0.62196  | 0.34968  | 0.75259  | 1.02794  | 0.62829  | 0.48851  | 0.71063  | 0.39177  | 0.56504  | 0.57521  | 0.32474  | 0.34725  | 0.27599  | 0.07501  | -0.1632  | -0.25957 | -0.35587 | -0.60428 | -0.40278 | -0.1224  | 0.09868  | 0.22401  | 0.52122  |
| PFF0960c    | -0.3311  | -0.30127 | -0.51355 | -0.40416 | -0.47986 | -0.68746 | -0.48374 | -0.47978 | -0.41253 | -0.41531 | -0.26245 | -0.19939 | -0.0457  | 0.09952  | 0.23995  | 0.15299  | -0.00149 | 0.21684  | -0.12593 | -0.02963 | -0.01731 | -0.25208 | -0.394   | -0.33318 |
| PF10 0189   | -0.14539 | -0.25102 | -0.2274  | -0.38349 | -0.55764 | -0.54875 | -0.66087 | -0.90495 | -1.22593 | -1.22801 | -1.12732 | -1.09074 | -0.83859 | -0.52405 | 0.15282  | 0.54758  | 1.12855  | 0.5771   | 0.98563  | 0.80948  | 0.94021  | 0.71064  | 0.60954  | -0.08898 |
| PFC0710w    | -1.25137 | -1.35785 | -1.21062 | -1.82754 | -2.15678 | -2.3587  | -2.19223 | -2.04996 | -1.66904 | -1.30778 | -0.74992 | -0.45134 | -0.00535 | 0.22871  | 0.65373  | 0.81213  | 0.85529  | 0.67913  | 0.17167  | -0.02805 | -2.44404 | -0.57532 | -0.91746 | -1.25189 |
| PFC0785c    | -0.43126 | -0.10253 | 0.33476  | -0.0498  | 0.08262  | 0.13035  | 0.04369  | 0.0664   | 0.45097  | 0.47225  | 0.72677  | 0.84627  | 0.91823  | 0.66856  | 0.66962  | 0.51097  | 0.24986  | 0.10998  | -0.41263 | -0.79946 | -1.23048 | -0.84012 | -0.97327 | -0.88304 |
| PFF1585w    | 0.99369  | 1.00574  | 0.73823  | 0.90205  | 0.89041  | 1.12747  | 1.22436  | 1.21434  | 1.12522  | 0.7985   | 0.76442  | 0.4502   | 0.47856  | 0.4489   | 0.25306  | 0.2374   | 0.20716  | 0.09318  | 0.31378  | 0.06361  | -0.06386 | 0.12961  | 0.09815  | 0.18013  |
| PF10 0035   | -0.27163 | -0.06874 | -0.33473 | -0.15277 | 0.11927  | 0.40212  | 0.59217  | 0.74934  | 0.87568  | 0.59966  | 0.73809  | 0.46472  | 0.60957  | 0.32768  | 0.33208  | 0.20984  | 0.14857  | -0.02476 | 0.20755  | -0.06359 | -0.05214 | -0.34547 | 0.23696  | 0.10311  |
| PFC0005w    | -0.41392 | -0.95041 | -0.05613 | -0.16409 | -0.69121 | -0.61742 | -0.32154 | -0.402   | -0.04829 | -0.33437 | -0.66107 | -0.41536 | -0.27909 | -1.06353 | -0.93395 | -0.69589 | -0.40054 | -0.41866 | -0.50847 | -0.48845 | -0.57139 | -1.31083 | -0.55752 | -0.54165 |
| PF08 0022   | 0.18218  | 0.143    | -0.06792 | 0.05302  | 0.23717  | 0.20572  | -0.17668 | -0.25379 | -0.31679 | -0.31576 | -0.28852 | -0.28154 | -0.35788 | -0.14355 | -0.01549 | 0.33097  | 0.37499  | 0.50754  | 0.53091  | 0.61343  | 0.55963  | 0.23647  |          |          |

|                |          |          |          |          |          |          |          |          |          |          |          |          |          |          |          |          |          |          |          |          |          |          |          |          |
|----------------|----------|----------|----------|----------|----------|----------|----------|----------|----------|----------|----------|----------|----------|----------|----------|----------|----------|----------|----------|----------|----------|----------|----------|----------|
| PFL0450c       | -0.26583 | 0.07167  | 0.56534  | 0.28186  | 0.48828  | 0.57118  | 0.52057  | 0.88688  | 0.78844  | 0.77139  | 0.75983  | 0.70623  | 0.60304  | 0.19617  | 0.22575  | 0.03922  | -0.04421 | -0.0316  | -0.04311 | -0.49678 | -0.77415 | -0.66055 | -0.62744 | -0.31062 |
| PFE1005w       | -0.83894 | 0.03969  | 0.24731  | 0.49079  | 0.89443  | 0.88076  | 0.97142  | 0.64838  | 0.55989  | 0.9696   | 0.87812  | 0.52381  | 0.3512   | 0.16186  | 0.03868  | -0.29726 | -0.60128 | -0.8023  | -1.08749 | -1.90011 | -1.89449 | -1.49659 | -1.40109 | -1.03218 |
| MAL13P1.176    | 1.29437  | 0.43416  | 0.0954   | -0.45916 | -0.52577 | -0.92081 | -1.17173 | -1.66681 | -2.15164 | -2.41423 | -2.55576 | -2.54172 | -2.76889 | -2.67183 | -2.87282 | -2.50542 | -1.41618 | -0.32021 | 0.77269  | 1.42462  | 1.61532  | 1.40572  | 1.48173  | 1.37229  |
| PFE1030c       | 0.2892   | -0.26743 | -0.535   | -0.51733 | -0.57996 | -0.18766 | 0.49696  | 0.53238  | 0.3032   | 0.21385  | 0.2832   | 0.3128   | 0.26426  | 0.03515  | 0.16604  | 0.29439  | 0.61615  | 0.14782  | 1.29236  | 0.62133  | 0.65607  | 0.33847  | 0.3154   | 0.11111  |
| PFL2055w       | -0.35107 | 0.08501  | 0.29882  | 0.3752   | 0.18449  | 0.58979  | 0.43891  | 0.31941  | 0.9184   | 0.41444  | 0.59225  | 0.73538  | 0.29123  | -0.10028 | 0.10681  | -0.12579 | -0.44003 | -0.42274 | -0.86605 | -1.65251 | -1.37351 | -0.93177 | -0.85215 | -0.67756 |
| PF10950w       | -0.78644 | -0.86735 | -1.08073 | -0.95975 | -1.02486 | -1.0307  | -1.20428 | -1.29205 | -1.56018 | -1.7678  | -1.50108 | -1.23191 | -0.4368  | 0.26087  | 0.89093  | 0.99895  | 0.8916   | 0.654    | 0.51539  | 0.35292  | 0.01323  | -0.10607 | -0.31112 | -0.37863 |
| PF10170w       | 0.77953  | 0.75888  | 1.03225  | 0.87831  | 0.72379  | 0.63591  | 0.51024  | 0.43868  | 0.57172  | 0.59402  | 0.41267  | 0.50339  | 0.35095  | 0.34     | 0.16237  | -0.17615 | -0.3076  | -0.34842 | -0.50371 | -0.09022 | 0.03386  | 0.22928  | 0.50423  | 0.57909  |
| PFA0275c       | 0.16189  | 0.60187  | 0.70925  | 0.92583  | 0.92427  | 1.01954  | 0.90073  | 0.83391  | 0.74947  | 0.63547  | 0.63384  | 0.5675   | 0.44411  | 0.42345  | 0.2241   | 0.02202  | -0.23745 | -0.0233  | -0.04289 | -0.34824 | -0.32811 | -0.07245 | 0.02588  | -0.05186 |
| PF10_0007      | -1.22654 | -1.13871 | -0.35634 | -0.35805 | -0.58196 | -0.44814 | 1.42254  | 2.60257  | 2.86006  | 2.49226  | 2.10739  | 1.57458  | 0.73283  | 0.06591  | -0.5955  | -1.07115 | -1.68456 | -1.7041  | -1.75103 | -1.51869 | -2.00836 | -2.06842 | -1.87274 | -1.94366 |
| PF14_0155      | 0.70515  | 0.62705  | 0.30625  | 0.47562  | 0.51012  | 0.53977  | 0.43575  | 0.38057  | 0.11973  | -0.07738 | 0.12864  | -0.16561 | -0.24002 | -0.18518 | -0.00285 | 0.31053  | 0.41973  | 0.53508  | 0.79779  | 0.55596  | 0.63155  | 0.78193  | 0.68103  | 0.66184  |
| PF10_0289      | -1.48145 | -1.30009 | -1.04391 | -1.02034 | -1.0177  | -0.84376 | -1.00779 | -0.98449 | -0.8423  | -0.22973 | 0.38423  | 0.72135  | 0.83944  | 0.77648  | 0.7172   | 0.44661  | -0.01629 | -0.4171  | -0.95897 | -1.58843 | -1.68544 | -1.5495  | -1.68667 | -1.42196 |
| MAL13P1.274    | 0.08034  | 0.26485  | 0.44715  | 0.48765  | 0.49222  | 0.41867  | 0.42569  | 0.38078  | 0.53639  | 0.73373  | 0.86303  | 0.83193  | 0.84973  | 0.60613  | 0.46035  | 0.0924   | -0.19012 | -0.37328 | -0.48102 | -0.79401 | -0.75039 | -0.59353 | -0.41677 | -0.18551 |
| PF13_0314      | 0.51301  | 0.39397  | 0.2036   | 0.42394  | 0.4907   | 0.28648  | 0.13139  | 0.05116  | -0.37056 | -0.45666 | -0.46531 | -0.82453 | -0.77028 | -0.86164 | -0.38279 | 0.23729  | 0.42866  | 0.75593  | 1.00751  | 1.27192  | 1.02788  | 1.30935  | 1.24221  |          |
| PF0595c        | -0.46678 | -0.49348 | -0.48424 | -0.91923 | -1.13067 | -1.17046 | -1.29006 | -1.83552 | -1.80534 | -1.88683 | -1.93865 | -1.64232 | -0.72256 | 0.1264   | 0.75245  | 1.04785  | 0.94885  | 1.15766  | 0.44288  | 0.69947  | 0.65814  | 0.50685  | 0.12221  | -0.34826 |
| PF13_0096      | 0.12642  | 0.18929  | -1.04043 | 0.84898  | 0.8181   | 1.09474  | 1.00194  | 1.01001  | 0.86864  | 0.43494  | 0.38315  | 0.28465  | 0.30853  | 0.24808  | 0.43826  | 0.30722  | 0.2871   | 0.04465  | 0.5026   | 0.02029  | -0.14399 | -0.12443 | -0.14712 | -0.13124 |
| PF10_0177a     | -0.34226 | -0.54604 | -0.6058  | -0.90702 | -1.02375 | -1.2387  | -1.43504 | -1.59703 | -1.99627 | -2.25604 | -2.31483 | -2.50158 | -2.16282 | -1.49868 | -0.24219 | 0.60931  | 1.05602  | 0.87615  | 0.5946   | 0.88032  | 0.96056  | 0.36438  | 0.1287   | -0.40554 |
| PF08_0036      | 0.40116  | 0.45787  | 0.33752  | 0.53652  | 0.3018   | 0.32136  | 0.01891  | -0.1585  | -0.63044 | -0.84474 | -0.55071 | -0.45196 | -0.33088 | -0.33314 | 0.03903  | 0.23097  | 0.06661  | 0.04952  | 0.28773  | -0.01801 | -0.05088 | 0.08875  | 0.21414  | 0.08243  |
| PF11_0504      | 2.26746  | 2.65449  | 2.28063  | 2.20109  | 1.83221  | 1.7943   | 0.64929  | 0.97482  | 0.84026  | 1.21416  | 1.3208   | 0.22832  | 0.11329  | -0.16435 | -0.19897 | -0.33281 | -0.99064 | -0.70466 | -0.74309 | -0.51695 | -0.03153 | 0.87396  | 1.20206  | 1.14568  |
| PF14_0686      | 0.66968  | 0.891    | 1.05846  | 0.96727  | 0.99669  | 1.08233  | 0.98426  | 0.58774  | 0.73683  | 0.67747  | 0.546    | 0.67643  | 0.64212  | 0.80914  | 0.3931   | 0.05307  | 0.15076  | -0.0591  | -0.94431 | -0.56048 | -0.63261 | -0.19947 | -0.10314 | 0.01759  |
| PFA0430c       | -0.60478 | -0.35313 | -0.42052 | -0.39863 | -0.22351 | -1.17138 | 0.13242  | 0.11536  | 0.41676  | 0.02761  | 0.03319  | -0.01263 | 0.21799  | 0.53977  | 0.46843  | 0.45289  | -0.0954  | 0.30345  | -0.22547 | -0.29881 | -0.48611 | -0.19251 | -0.47522 | -0.54132 |
| MAL13P1.197    | 0.52411  | 0.88241  | 0.64049  | 0.68268  | 0.93564  | 0.74055  | 0.75202  | 0.87039  | 0.73368  | 0.70627  | 0.59664  | 0.40543  | 0.3284   | 0.12563  | 0.08034  | -0.05421 | 0.18308  | 0.0751   | -0.20122 | 0.06716  | 0.00601  | -0.00052 | 0.07515  |          |
| PF07_0045      | 0.14357  | 0.43426  | 0.64691  | 0.65517  | 0.63716  | 0.66893  | 0.62006  | 0.33496  | 0.25126  | 0.2126   | 0.37814  | 0.37034  | 0.40912  | 0.31174  | 0.3787   | 0.30029  | 0.02449  | -0.17152 | -0.24873 | -0.52925 | -0.63363 | -0.51435 | -0.33329 | 0.01971  |
| PF13_0172      | 0.44908  | 0.67942  | -0.98272 | 0.70243  | 1.07744  | 0.4037   | 0.33665  | 1.38916  | 0.56401  | 0.25562  | 0.1803   | 0.01928  | -0.22385 | -0.29885 | -0.35565 | -0.2798  | -0.30563 | 0.07443  | 0.16201  | 0.17629  | 0.28216  | 0.35346  | 0.28597  | 0.26598  |
| PFL1020w       | 0.04687  | -0.85186 | -1.62316 | 0.97196  | 1.06044  | 1.41367  | 1.37672  | 1.55777  | 1.32143  | 0.84047  | 0.93394  | 0.7155   | 0.74669  | 0.58415  | 0.62206  | 0.63219  | -0.07764 | 0.10475  | 0.35257  | -0.19738 | -0.44076 | -0.40803 | -0.32436 | -0.16877 |
| PF13_0179      | -0.80173 | -0.21109 | -0.04178 | 0.66611  | 0.15128  | 0.23472  | 0.36151  | 0.32349  | 0.51155  | 0.6117   | 0.78248  | 0.80149  | 1.03284  | 0.61279  | 0.56775  | 0.01803  | -0.30874 | -0.7099  | -0.9102  | -1.53618 | -1.55291 | -1.19658 | -1.21842 | -0.86847 |
| PFC0065c       | 1.22216  | 0.5453   | 0.47219  | 0.57233  | 0.86499  | 0.99553  | 1.06687  | 1.0977   | 0.95753  | 0.68788  | 0.32827  | -0.11498 | -0.60176 | -1.0424  | -1.4883  | -1.84466 | -1.55332 | -1.33734 | 0.6746   | 0.73802  | 0.92315  | 0.9254   | 1.15645  | 1.4196   |
| PFD0685c       | -1.14075 | -1.09406 | -1.24128 | -1.24149 | -1.30258 | -1.33021 | -1.29485 | -1.06102 | -0.28649 | 0.19302  | 0.46691  | 0.70231  | 0.87464  | 0.94084  | 0.93177  | 0.4795   | 0.35074  | 0.30672  | -0.53525 | -0.36616 | -0.51252 | -0.63891 | -0.68922 | -0.69649 |
| MAL13P1.222    | 0.51997  | 0.76533  | 0.85985  | 1.01059  | 1.11526  | 1.18327  | 1.13433  | 1.11172  | 0.99902  | 0.72915  | 0.63447  | 0.34327  | 0.10938  | -0.13863 | -0.51895 | -0.82789 | -0.94864 | -1.19095 | -1.07007 | -0.76809 | -0.43127 | -0.1582  | 0.06338  | 0.41472  |
| PF11_0233      | -0.64092 | -0.84066 | -0.88913 | -1.12717 | -1.22333 | -1.26317 | -1.20743 | -0.83659 | -0.44559 | -0.27939 | -0.21974 | 0.02243  | 0.25267  | 0.62629  | 0.62077  | 0.70869  | 0.65046  | 0.2502   | 0.37437  | 0.30216  | -0.0743  | -0.35159 | -0.73871 |          |
| PFB0415c       | 0.56539  | 0.691    | 0.76796  | 0.91256  | 0.85584  | 1.14779  | 1.04098  | 0.87995  | 0.84803  | 0.68426  | 0.81065  | 0.86157  | 0.58242  | 0.46403  | 0.34976  | 0.28936  | -0.24998 | 0.07713  | -0.05789 | -0.3811  | -0.44953 | -0.3002  | -0.11707 | 0.15665  |
| PF11_0403      | 0.24458  | 0.28463  | -0.23845 | 0.87994  | 0.94879  | 0.96393  | 0.87912  | 0.87003  | 0.5289   | 0.53216  | 0.64482  | 0.31096  | 0.59772  | 0.38732  | 0.42056  | 0.31632  | -0.06421 | -0.06122 | 0.14769  | -0.25415 | -0.57153 | -0.38467 | -0.35373 | -0.03635 |
| MAL7_trna_Thr2 | 0.58519  | 0.93456  | 0.55975  | 0.02931  | 0.06204  | 0.21412  | 0.29363  | 0.77313  | 1.15655  | 0.85483  | 0.9124   | 0.98274  | 0.51419  | 0.40725  | 0.15996  | 0.14974  | 0.00525  | 0.06809  | -0.07823 | -0.19038 | -0.16668 | -0.01815 | -0.20669 | -0.30998 |
| MAL13P1.289    | 0.27754  | 0.70972  | 0.50251  | 1.00881  | 0.76088  | 0.88174  | 0.92918  | 0.73117  | 0.84424  | 0.80788  | 0.86529  | 0.77209  | 0.64397  | 0.49249  | 0.3578   | 0.01824  | -0.1654  | -0.32969 | -0.5447  | -0.495   | -0.35778 | -0.03631 | 0.03322  | 0.39983  |
| PF11750c       | -1.00996 | -1.00762 | -0.61204 | -0.35798 | 0.22371  | 1.24206  | 2.18149  | 2.65336  | 2.41553  | 1.77184  | 1.49032  | 0.70652  | 0.04431  | -0.84748 | -1.04931 | -1.0212  | -1.25088 | -1.19343 | -1.53658 | -1.04073 | -0.91533 | -1.0012  | -0.67515 |          |
| PF10140c       | 0.57744  | 0.69853  | 0.51489  | 0.55891  | 0.36289  | 0.30992  | 0.14568  | -0.08714 | -0.53841 | -0.75027 | -0.88856 | -0.78918 | -0.86987 | -0.66318 | -0.27111 | 0.16062  | 0.53884  | 0.36104  | 0.82242  | 0.76404  | 0.74624  | 0.64519  | 0.82623  | 0.53198  |
| PF13_0339      | 0.88613  | 0.59716  | 0.31223  | 0.48006  | 0.46877  | 0.2834   | 0.13489  | 0.05579  | 0.02563  | -0.03577 | -0.05626 | -0.01924 | -0.13656 | -0.16631 | -0.37994 | -0.40566 | -0.54129 | -0.68116 | -0.23827 | 0.179    | 0.29548  | 0.4297   | 0.65914  | 0.81051  |
| PF13_0061      | -0.43463 | -0.47802 | 0.63441  | -0.15402 | -0.16462 | 0.09097  | 0.05756  | 0.20576  | 0.34056  | 0.38145  | 0.53491  | 0.61336  | 0.71964  | 0.46518  | 0.6129   | 0.62379  | 0.22346  | 0.43236  | 0.58386  | 0.23698  | -0.17584 | -0.32821 | -0.2452  | -0.37135 |
| MAL7P1.149     | -0.64047 | -0.73269 | -1.38643 | -0.87973 | -1.10179 | -0.81403 | -0.49431 | -0.43411 | 0.16652  | 0.35088  | 0.26973  | 0.35203  | 0.48902  | 0.70265  | 0.66541  | 0.71566  | 0.61844  | 0.36082  | 0.56301  | 0.18965  | -0.12121 | -0.28972 | -0.31589 | -0.70924 |
| PFC0261c       | -0.40426 | -0.34817 | -1.07119 | -0.33714 | -0.49449 | -0.63863 | -0.62411 | -0.51055 | -1.14398 | -0.87668 | -0.5129  | -0.59002 | -0.43835 | -0.48304 | -0.34723 | -0.0643  | -0.07295 | -0.04749 | 0.56066  | 0.24862  | -0.01437 | -0.05207 | 0.06057  | -0.1202  |
| PFC0950c       | -0.60559 | -0.63414 | -0.85128 | -0.91141 | -0.95128 | -0.94957 | -0.61935 | -0.03848 | 0.24876  | 0.32924  | 0.72974  | 0.99189  | 0.80081  | 0.79476  | 1.01897  | 0.75992  | 0.27587  | 0.43509  | 0.63037  | 0.16703  | 0.07439  | -0.18136 | -0.41855 | -0.62823 |
| PF0385c        | 0.99159  | 0.5961   | -0.10273 | 0.03726  | 0.03112  | -0.44106 | -0.60306 | -0.30892 | 0.29224  | 0.47911  | 0.54322  | 0.4713   | 0.34547  | 0.19432  | 0.10016  | -0.24876 | -0.28054 | -0.37692 | 0.27333  | 0.59571  | 0.93571  | 0.77742  | 0.       |          |

|                     |          |          |          |          |          |          |          |          |          |          |          |          |          |          |          |          |          |          |          |          |          |          |          |          |
|---------------------|----------|----------|----------|----------|----------|----------|----------|----------|----------|----------|----------|----------|----------|----------|----------|----------|----------|----------|----------|----------|----------|----------|----------|----------|
| MAL13P1.310         | 0.66195  | 0.83418  | 0.79619  | 0.79272  | 0.6005   | 0.56984  | 0.507    | 0.43202  | 0.30496  | 0.26368  | 0.05825  | -0.11115 | -0.13839 | -0.08699 | -0.2009  | -0.0047  | 0.14907  | 0.25131  | -0.01973 | 0.31547  | 0.38035  | 0.43233  | 0.39264  | 0.3382   |
| PF1270w             | -0.43073 | 0.07377  | 0.07655  | 0.02047  | 0.58029  | -0.21836 | -0.13241 | 0.37992  | 1.13865  | 0.99556  | 0.71993  | 0.71268  | 0.36932  | 0.04212  | -0.49562 | -0.97224 | -0.98761 | -1.65798 | -1.81457 | -1.34342 | -0.84467 | -0.8182  | -0.24996 | 0.06329  |
| PF13 0079           | -0.12728 | -0.16857 | -0.14207 | -0.50874 | -0.51637 | -0.64991 | -0.74621 | -1.07032 | -1.30768 | -1.19457 | -1.45966 | -1.46234 | -1.36273 | -1.0541  | -0.29094 | 0.48137  | 1.33608  | 0.80092  | 0.92752  | 1.19461  | 1.21677  | 0.559    | 0.33646  | -0.12407 |
| MAL13P1.46          | -0.6282  | -0.27235 | -0.33924 | -0.50929 | -0.36892 | -0.25097 | -0.04138 | 0.24314  | 0.72091  | 0.75856  | 0.95517  | 0.83567  | 0.87236  | 0.70798  | 0.40231  | 0.33813  | 0.1196   | -0.23419 | -0.3822  | -0.64021 | -0.86176 | -0.78347 | -0.95007 | -0.67969 |
| PFE0430w            | -0.02759 | 0.28511  | 0.45451  | 0.36661  | 0.21699  | 0.28249  | 0.3349   | 0.13437  | 0.25001  | 0.41046  | 0.31089  | 0.36271  | 0.44868  | 0.46157  | 0.1818   | -0.0657  | 0.17147  | -0.06017 | -0.65503 | -0.3958  | -0.2757  | -0.09118 | -0.09786 | -0.03982 |
| PFB0795w            | -0.46434 | -0.46598 | -0.54831 | -0.69739 | -0.76921 | -0.61543 | -1.02783 | -0.91929 | -0.76114 | -0.33516 | 0.08153  | 0.22794  | 0.61673  | 0.55113  | 0.67256  | 0.57223  | 0.43305  | 0.10304  | 0.30839  | 0.14135  | -0.06866 | -0.21644 | -0.27013 | -0.421   |
| PFIO205w            | 0.19318  | 0.67709  | 0.85399  | -1.12333 | 1.14825  | 1.05518  | 1.01995  | 1.05181  | 0.44411  | 0.0813   | 0.21722  | -0.15387 | -0.28086 | -0.33873 | 0.35972  | -0.42808 | -0.18625 | -0.31238 | 0.0977   | 0.26227  | 0.08645  | 0.77731  | 1.21994  | 1.33259  |
| PFL1395c            | -0.86973 | -0.91655 | -0.62913 | -1.14281 | -1.17478 | -1.16108 | -0.93935 | -0.88019 | -0.56945 | -0.365   | -0.26738 | -0.18803 | 0.1396   | 0.38731  | 0.51122  | 0.53428  | 0.49539  | 0.63294  | -0.38458 | -0.03583 | -0.12245 | -0.3032  | -0.63865 | -0.85567 |
| PF11 0332           | -1.06226 | -1.2475  | -1.57351 | -1.49224 | -1.19898 | -1.67258 | -1.36733 | -0.81985 | -0.2479  | 0.00603  | 0.43701  | 0.68488  | 0.6892   | 0.57628  | 0.52926  | 0.46067  | -0.06341 | 0.24373  | 0.02971  | -0.1232  | -0.55126 | -0.9144  | -0.80442 | -0.91935 |
| MAL8P1.114          | 0.95435  | 1.04744  | 0.52961  | 0.5557   | 0.76816  | 0.63007  | 0.32478  | 0.7324   | 0.42558  | 0.47159  | 0.54045  | 0.52914  | 0.55553  | 0.2945   | 0.4682   | 0.25607  | -0.17888 | 0.1406   | 0.16365  | 0.07195  | 0.04729  | 0.10249  | 0.34687  | 0.64986  |
| PFA0570w            | -1.50414 | -1.27152 | -1.23551 | -0.94401 | -0.7577  | -0.3601  | 0.05198  | 0.21644  | 0.35318  | 0.70219  | 0.71892  | 0.81409  | 0.95947  | 0.84302  | 0.58939  | 0.22102  | 0.10579  | -0.03806 | -0.53797 | -0.74774 | -0.89036 | -0.78294 | -0.91655 | -0.79452 |
| PFF0675c            | 0.60575  | -0.02355 | -0.38199 | -1.12939 | -1.72987 | -2.07437 | -2.45197 | -2.85133 | -3.18496 | -3.6515  | -3.59011 | -3.87798 | -3.96353 | -4.16574 | -3.71592 | -2.48111 | -0.50171 | 0.39309  | 0.80277  | 1.37525  | 1.66432  | 1.30045  | 1.27022  | 0.70015  |
| PF13 0212           | 0.81865  | 0.62925  | 0.63188  | 0.37788  | 0.19256  | 0.13741  | 0.12169  | 0.01822  | -0.05376 | -0.1888  | -0.00167 | -0.02921 | -0.09741 | -0.20532 | 0.27918  | 0.13441  | -0.15411 | -0.10585 | 0.07191  | -0.19534 | 0.08948  | 0.02199  | 0.10108  | 0.35867  |
| PFL1620w            | -0.28359 | -0.11438 | 0.14212  | -0.289   | -0.53098 | -0.379   | -0.34177 | -0.70723 | -0.2552  | 0.25608  | 0.27239  | 0.48486  | 0.67459  | 0.82573  | 0.4268   | 0.18629  | 0.02626  | 0.03557  | -0.10549 | -0.61923 | -0.59875 | -0.11731 | -0.43239 | -0.41584 |
| PFB0200c            | -0.03841 | 0.2131   | 0.47069  | 0.58423  | 0.64796  | 0.75528  | 0.62001  | 0.53658  | 0.51464  | 0.50453  | 0.74388  | 0.64431  | 0.7115   | 0.39592  | 0.15964  | -0.09632 | -0.39951 | -0.40009 | -0.68819 | -0.8887  | -1.00313 | -0.79145 | -0.63673 | -0.35826 |
| PFF0950w            | -0.88006 | -0.61294 | -0.31952 | -0.39458 | -0.34814 | 0.08682  | 0.58758  | 0.11954  | 0.87936  | 0.88387  | 0.82266  | 0.68556  | 0.78332  | 0.77192  | 0.56308  | 0.3149   | 0.34512  | -0.03481 | -0.44425 | -0.53369 | -0.40061 | -0.76039 | -0.70773 | -0.73589 |
| PF14 0276           | -0.0885  | 0.28133  | 0.50053  | 0.59295  | 0.57264  | 0.72569  | 0.46429  | 0.20644  | 0.04903  | 0.08639  | 0.46693  | 0.54131  | 0.55425  | 0.40938  | 0.55222  | 0.46137  | -0.01795 | 0.1699   | 0.27592  | -0.21436 | -0.29682 | -0.266   | -0.14201 | 0.06782  |
| PFL0230w            | 0.53035  | 0.9024   | 1.24894  | 1.00272  | 1.28537  | 1.47475  | 1.3383   | 1.53925  | 1.30269  | 0.99523  | 0.83489  | 0.59485  | 0.38171  | 0.2286   | 0.21497  | -0.08038 | -0.46432 | -0.28312 | -0.60784 | -0.73007 | -0.9136  | -0.58169 | -0.2767  | 0.29334  |
| MAL7P1.10           | -0.13112 | 0.4129   | 0.38291  | 0.31148  | 0.34638  | 0.43915  | 0.53873  | 0.62973  | 0.77794  | 0.6628   | 0.71819  | 0.65954  | 0.41304  | 0.05493  | 0.14263  | -0.18555 | -0.2015  | -0.3129  | 0.01965  | -0.3421  | -0.4897  | -0.32343 | -0.26959 | -0.01084 |
| PFD0495c            | 0.88647  | 0.29974  | 0.34484  | 0.3088   | 0.29803  | 0.39587  | 0.49971  | 0.63166  | 0.14301  | -0.38358 | -0.82977 | -1.04609 | -1.54487 | -1.41822 | -1.7228  | -1.51426 | -0.77082 | -0.68125 | 1.24729  | 1.07262  | 1.15637  | 0.80835  | 1.30529  | 1.59522  |
| PFE0505w            | 0.18587  | 0.1984   | 0.05628  | 0.09573  | 0.13828  | 0.16547  | 0.06402  | 0.21624  | 0.30622  | 0.44111  | 0.55107  | 0.46335  | 0.35637  | 0.14928  | 0.30358  | 0.28581  | 0.19389  | 0.26758  | 0.23613  | -0.0133  | -0.09728 | -0.15492 | -0.20281 | -0.09341 |
| PF11 0201           | 0.28164  | 0.35436  | 0.23235  | 0.50887  | 0.38672  | 0.44177  | 0.30381  | 0.19472  | 0.12385  | 0.10563  | -0.00015 | 0.03483  | 0.16589  | 0.41831  | 0.26234  | 0.2426   | 0.25212  | 0.07006  | -0.09145 | -0.01623 | -0.03026 | -0.09128 | -0.21095 | -0.14516 |
| PFC0520w            | -0.83635 | -0.62905 | -0.07988 | -0.38554 | -0.39989 | -0.12004 | -0.12001 | -0.08501 | -0.2331  | -0.10645 | 0.27044  | 0.25487  | 0.37318  | 0.12092  | 0.47849  | 0.43474  | 0.22757  | -0.1439  | 0.4629   | -0.2403  | -0.48848 | -0.47037 | -0.63569 | -0.53847 |
| PF11 0301           | -1.08677 | -0.7743  | -1.26234 | -1.23466 | -1.30256 | -0.42005 | -0.33774 | 0.50113  | 0.12793  | 0.82249  | 0.4934   | 0.18214  | 0.53968  | 0.47935  | 0.32546  | 0.1595   | -0.7528  | -0.52508 | -1.1747  | -1.20028 | -1.66144 | -1.94863 | -1.5079  | -1.649   |
| PFL0395c            | -0.58637 | -0.59399 | -0.03956 | -0.519   | -0.50021 | -0.40857 | 0.04431  | 0.0662   | 1.19484  | 1.20982  | 1.17966  | 1.03212  | 0.84914  | 0.70842  | 0.48345  | 0.20375  | -0.07762 | -0.17836 | -0.16039 | -0.35792 | -0.47965 | -0.29927 | -0.32041 | -0.27015 |
| PF14 0405           | -0.37419 | -0.45684 | -0.49303 | -0.65026 | -0.62288 | -0.62129 | -0.81412 | -0.76691 | -1.29424 | -0.8533  | -0.67145 | -0.43891 | 0.11327  | 0.54186  | 0.66692  | 0.58463  | 0.91789  | 0.67132  | -0.15572 | 0.47516  | 0.25275  | 0.06652  | -0.14503 | -0.31944 |
| PFE0915c            | -1.22088 | -1.13306 | -1.00416 | -1.08643 | -1.1138  | -0.76313 | -0.63953 | -0.26423 | -0.45012 | -0.16839 | 0.20659  | 0.34541  | 0.48726  | 0.35076  | 0.76313  | 0.70709  | 0.58446  | 0.35454  | 0.1308   | -0.45585 | -0.70472 | -0.9806  | -1.14294 | -1.11866 |
| PF10 0307           | 0.41936  | 0.26186  | -0.24161 | -0.14077 | -0.12302 | 0.14653  | 0.86523  | 0.88521  | 0.58709  | 0.28103  | -0.0313  | -0.25565 | -0.15138 | 0.04609  | 0.03519  | 0.14745  | 0.32361  | 0.70218  | 0.48512  | 0.76699  | 0.96306  | 0.55077  | 0.62616  | 0.67034  |
| PF11 0096           | -0.26599 | 0.33331  | -0.07577 | -0.09768 | -0.1154  | -0.26224 | -0.3184  | -0.14013 | -0.26774 | -0.08862 | 0.23073  | 0.25264  | 0.31774  | 0.25123  | 0.48349  | 0.35464  | 0.32329  | 0.05326  | -0.56276 | -0.99861 | -1.09408 | -0.91738 | -0.97987 | -0.83553 |
| PFA0180w            | 0.01436  | -0.06979 | -0.10435 | 0.02232  | 0.25607  | 0.43101  | 0.61887  | 0.57833  | 0.83966  | 0.77285  | 0.49111  | 0.57046  | 0.48137  | 0.73784  | 0.14748  | -0.10898 | -0.05237 | 0.08741  | -0.80694 | 0.04192  | 0.02855  | -0.20435 | -0.20044 | -0.10313 |
| MAL13P1.301         | 0.1941   | 0.39246  | 0.65887  | 0.43714  | 0.59842  | 0.46102  | 0.59723  | 0.39935  | 0.44187  | 0.55443  | 0.48617  | 0.59264  | 0.46055  | 0.50129  | 0.3495   | 0.24663  | 0.06083  | 0.17064  | -0.24943 | 0.00147  | 0.06795  | 0.31725  | 0.28824  | 0.48821  |
| MAL7P1.117          | -0.84344 | -0.72352 | -0.41799 | -0.60242 | -1.0752  | -0.50203 | -0.26164 | -0.11709 | 0.08639  | 0.03759  | 0.43432  | 0.32176  | 0.64584  | 0.48806  | 0.6507   | 0.68414  | -0.19769 | 0.23726  | -0.1387  | -0.51095 | -0.77646 | -0.91835 | -1.15238 | -1.05663 |
| PF11 0425           | -1.24042 | -1.31839 | -1.34976 | -1.68352 | -1.76883 | -2.00498 | -2.03625 | -1.92197 | -2.02451 | -1.18293 | -0.52003 | 0.05406  | 0.44478  | 0.61224  | 0.93632  | 0.74604  | 0.85257  | 0.41681  | -0.12349 | -0.14033 | -0.37222 | -0.68719 | -0.94853 | -1.13809 |
| PF14 0659           | 0.10544  | 0.3891   | 0.43862  | 0.55918  | 0.61663  | 0.77962  | 0.68253  | 0.72247  | 0.56773  | 0.52563  | 0.5042   | 0.39079  | 0.24709  | 0.28411  | 0.38001  | 0.30603  | 0.01411  | 0.03263  | -0.00185 | -0.11181 | -0.22469 | -0.20971 | -0.08326 | 0.34659  |
| MAL13_tRNA_GI<br>y1 | 0.09843  | 1.46876  | -0.11889 | -0.01751 | -0.31875 | 0.44338  | -0.36749 | 0.39015  | 0.37638  | -0.13484 | -0.33284 | -0.51128 | -0.54303 | -0.66469 | -0.14661 | -0.08764 | -1.19032 | 0.76689  | 0.28143  | 0.31377  | 0.27195  | 1.53919  | 0.42866  | 0.1662   |
| MAL13P1.140         | -0.68171 | -0.62609 | -0.34367 | -0.70075 | -0.99926 | -1.08044 | -0.85993 | -1.35226 | -0.87536 | -1.03667 | -1.00889 | -0.59686 | 0.01553  | 0.55497  | 0.63827  | 0.7511   | 0.76135  | 0.77275  | 0.08126  | 0.49947  | 0.26926  | -0.13247 | -0.44051 | -0.70398 |
| PF14 0734           | 1.68499  | 1.79215  | 1.16685  | 1.38665  | 0.95392  | 0.67478  | 0.24782  | 0.23684  | 0.0578   | -0.35475 | -0.35856 | -0.73802 | -1.34403 | -1.7624  | -1.96724 | -2.35183 | -3.25797 | -2.38888 | -0.03438 | 0.81494  | 1.08644  | 1.16606  | 1.48687  | 1.70381  |
| PF08 0065           | 0.95096  | 1.29664  | 1.20207  | 1.43702  | 1.43461  | 1.35915  | 1.23469  | 1.12933  | 0.81998  | 0.66642  | 0.57083  | 0.15945  | -0.08036 | -0.38841 | -0.53088 | -0.59511 | -0.81818 | -0.91069 | -0.22154 | -0.33634 | -0.002   | 0.35502  | 0.60865  | 0.75673  |
| PFO7 0005           | 1.45583  | 0.80406  | 0.58706  | 0.58772  | 0.84883  | 0.76006  | 0.73765  | 0.68713  | -0.16898 | -0.71687 | -1.12152 | -1.74267 | -2.17892 | -2.36703 | -2.48206 | -2.60402 | -2.19143 | -2.09327 | 0.63117  | 0.92168  | 1.22082  | 0.8689   | 1.20826  | 1.77413  |
| PF11 0036           | -0.32193 | -0.42152 | -0.29522 | -0.24723 | -0.15542 | -0.04248 | 0.17207  | 0.4397   | 0.68248  | 0.63087  | 0.62785  | 0.47397  | 0.35943  | 0.03055  | 0.20293  | -0.07807 | -0.056   | -0.28324 | 0.39899  | -0.01663 | 0.01759  | -0.21654 | 0.02476  | 0.33794  |
| PFE0730c            | 0.23393  | 0.31155  | 0.43249  | 0.30529  | 0.65991  | 0.61694  | 0.63508  | 0.88734  | 1.09274  | 0.7537   | 0.85063  | 0.94834  | 0.65987  | 0.21353  | 0.14882  | 0.12202  | -0.25223 | -0.39148 | -0.08543 | -0.4     |          |          |          |          |

|             |          |          |          |          |          |          |          |          |          |          |          |          |          |          |          |          |          |          |          |          |          |          |          |          |
|-------------|----------|----------|----------|----------|----------|----------|----------|----------|----------|----------|----------|----------|----------|----------|----------|----------|----------|----------|----------|----------|----------|----------|----------|----------|
| PFL2050w    | 0.05563  | 0.27549  | 1.24021  | 1.07716  | 1.07766  | 1.46437  | 1.3755   | 1.36423  | 1.24934  | 1.03983  | 1.0772   | 0.74037  | 0.65805  | 0.46428  | 0.18558  | -0.02583 | -0.09301 | -0.29385 | -0.60893 | -0.7327  | -0.9165  | -0.48691 | -0.43016 | -0.12175 |
| PFI0810c    | -0.6152  | -0.76041 | -0.28087 | -0.34538 | -0.31255 | -0.21286 | 0.02697  | 0.38393  | 0.51152  | 0.26973  | 0.69453  | 0.68068  | 0.74304  | 0.59818  | 0.63738  | 0.48568  | 0.26841  | 0.44828  | 0.3707   | 0.07641  | -0.12045 | -0.38795 | -0.42349 | -0.15649 |
| MAL13P1.53  | 0.99987  | 1.48831  | 1.20187  | 1.1772   | 1.3842   | 1.29491  | 1.12201  | 1.45757  | 1.19008  | 0.96536  | 1.01602  | 0.69483  | 0.29761  | 0.0285   | -0.1548  | -0.36872 | -0.45832 | -0.51442 | -0.46252 | -0.86632 | -0.4670  | -0.0856  | 0.2606   | 0.59975  |
| MAL13P1.302 | 0.43371  | 0.26559  | 0.44109  | 0.34817  | 0.35961  | 0.2957   | 0.13285  | 0.04024  | 0.14889  | 0.10901  | 0.11798  | 0.19114  | 0.22037  | 0.35246  | 0.16727  | 0.11962  | -0.04435 | -0.2007  | -0.19082 | 0.00878  | -0.06729 | 0.07943  | 0.23933  | 0.38916  |
| MAL7P1.93   | -0.00721 | -0.5205  | -0.70918 | -0.53833 | -0.52145 | -0.44084 | -0.25176 | 0.08822  | 0.05108  | -0.28584 | -0.07799 | -0.10308 | 0.04208  | -0.16188 | 0.19002  | 0.31361  | 0.35506  | 0.19614  | 0.83539  | 0.45881  | 0.52337  | 0.27552  | 0.26235  | 0.32301  |
| PFA0165c    | 0.52123  | 0.70382  | 0.78158  | 0.95082  | 0.78881  | 0.90664  | 0.72509  | 0.51934  | 0.64829  | 0.43412  | 0.25704  | 0.18052  | 0.19006  | 0.05338  | 0.0566   | -0.16827 | -0.2186  | -0.04309 | 0.02749  | 0.29581  | 0.49205  | 0.37711  | 0.57893  | 0.65194  |
| PFL1450c    | 0.67928  | 0.53035  | 0.52483  | 0.78575  | 0.83229  | 0.73016  | 0.77598  | 0.76697  | 0.33338  | 0.08442  | 0.08448  | -0.03034 | -0.13008 | -0.14281 | -0.2837  | -0.24199 | 0.0549   | 0.11319  | 0.89268  | 0.73823  | 0.9039   | 0.78852  | 1.11537  | 1.00975  |
| PF11 0362   | 0.34858  | 0.59061  | 0.53822  | 0.78278  | 0.94874  | 1.12526  | 0.91453  | 0.56709  | -0.13475 | -0.79803 | -1.26491 | -1.93981 | -2.1468  | -2.03175 | -1.17098 | -0.21407 | 0.44761  | -0.04849 | 0.69482  | 0.31377  | 0.50961  | 0.35899  | 0.34472  | 0.30787  |
| PFL1550c    | 0.24055  | -0.09725 | -0.52023 | -0.36246 | -0.47617 | -0.98694 | -1.01218 | -1.19301 | -1.77558 | -1.65562 | -1.66485 | -1.64779 | -1.64522 | -1.91264 | -1.63419 | -1.49331 | -0.59237 | 0.15409  | 1.10706  | 1.14165  | 1.03531  | 0.91114  | 1.16275  | 1.25947  |
| PF0995c     | 0.49043  | 0.0281   | -0.26569 | -0.38708 | -0.67134 | -0.78401 | -1.04609 | -1.27101 | -1.68031 | -0.98131 | -2.00783 | -1.91483 | -2.18584 | -2.34516 | -1.43464 | -0.8909  | 0.06916  | 0.39096  | 1.09551  | 1.14194  | 1.06518  | 1.01886  | 0.96838  | 0.33633  |
| PF14 0229   | 0.44289  | 0.99583  | 0.85704  | 0.55519  | 1.12593  | 1.11621  | 0.63735  | 0.6044   | 0.70369  | 0.44545  | 0.42329  | 0.26776  | 0.38126  | 0.44261  | 0.26987  | -0.09227 | 0.03038  | 0.08389  | -0.42084 | -0.28777 | -0.33446 | -0.1255  | -0.09139 | 0.09737  |
| PF13 0040   | -0.01171 | -0.35165 | -0.53297 | -0.70166 | -0.69458 | -0.87167 | -0.83804 | -0.71846 | -0.59531 | -0.71194 | -0.51861 | -0.30321 | -0.21482 | -0.18086 | 0.01578  | 0.22703  | -0.01386 | 0.48227  | 0.4707   | 0.43266  | 0.36451  | 0.32455  | 0.08773  | 0.05997  |
| MAL8P1.88   | 1.69137  | 1.60493  | 1.37203  | 1.743    | 1.85808  | 1.11083  | 0.51388  | 0.32852  | -0.85253 | -1.15598 | -1.30881 | -1.71438 | -2.03461 | -2.2575  | -2.18259 | -2.43393 | -3.46722 | -1.96715 | -0.60108 | 0.60496  | 1.20078  | 1.12285  | 1.71671  | 2.09118  |
| PFC0300c    | -0.35888 | 1.14745  | 0.19717  | 0.44006  | 0.37738  | 0.61818  | 0.22299  | 0.41559  | 0.55386  | 0.33254  | 0.46644  | 0.51232  | 0.28537  | 0.2473   | -0.02621 | -0.1371  | -0.92519 | -0.79654 | -1.1987  | -1.51192 | -1.35253 | -0.97182 | -0.8507  | -0.71827 |
| PFD0872w    | 0.29243  | 0.30431  | 0.25346  | 0.03078  | 0.16886  | 0.05958  | 0.07713  | -0.14965 | -0.10682 | 0.21884  | 0.05742  | 0.20576  | 0.09454  | 0.20019  | 0.15893  | 0.28877  | 0.54143  | 0.52345  | 0.17044  | 0.59483  | 0.5875   | 0.7082   | 0.5574   | 0.28657  |
| PF14 0375   | -0.34542 | -0.35699 | -0.38723 | -0.40736 | -0.51193 | -0.66385 | -0.66438 | -1.04572 | -1.3713  | -1.3569  | -0.75932 | -0.70878 | -0.20713 | -0.07314 | 0.41842  | 0.53752  | 0.36215  | 0.61633  | 1.16283  | 0.71558  | 0.61522  | 0.29298  | 0.35915  | 0.27626  |
| PFL1735c    | 0.05716  | 0.21114  | 0.34312  | 0.26938  | 0.26965  | 0.32055  | 0.38448  | 0.42387  | 0.4017   | 0.46268  | 0.53035  | 0.43953  | 0.53256  | 0.42906  | 0.43938  | 0.25999  | -0.04848 | -0.20002 | -0.45706 | -0.61503 | -0.613   | -0.33712 | -0.4387  | -0.20124 |
| PFF1045w    | -0.34687 | -0.38768 | -0.11011 | -0.23761 | -0.1146  | 0.09273  | 0.34248  | 0.46871  | 1.06044  | 1.148    | 0.96583  | 0.88765  | 0.84122  | 0.72485  | 0.31496  | 0.12872  | -0.07936 | -0.16678 | -0.36634 | -0.43125 | -0.39398 | -0.34905 | -0.45941 | -0.38904 |
| PF10 0179   | 0.71514  | 0.70968  | 0.6929   | 0.53975  | 0.51564  | 0.29193  | 0.23733  | 0.36251  | 0.76369  | 0.68349  | 0.61247  | 0.37782  | 0.12032  | -0.27912 | -0.6124  | -0.7094  | -0.6595  | -0.40162 | -0.5072  | 0.09747  | 0.22139  | 0.21292  | 0.42089  | 0.44159  |
| MAL8P1.32   | -1.71297 | -1.62684 | -1.41223 | -1.59707 | -1.37313 | -1.13985 | -0.49101 | 0.27853  | 1.09477  | 1.23292  | 1.23385  | 1.23389  | 1.07715  | 0.85257  | 0.51234  | 0.14335  | -0.39774 | -0.28459 | -0.54965 | -0.95661 | -1.33181 | -1.42082 | -1.52606 | -1.55464 |
| PFL0285w    | -0.34856 | -0.42014 | -0.702   | -0.29752 | -0.32286 | -0.04541 | -0.04457 | 0.23202  | 0.6359   | 0.34958  | 0.50869  | 0.53304  | 0.12246  | 0.08347  | 0.04785  | 0.17317  | 0.14091  | 0.04729  | 0.18974  | -0.00815 | -0.20626 | -0.39115 | -0.33136 | -0.32149 |
| PFL1335w    | -0.2653  | -0.75987 | -0.97981 | -0.85008 | -0.92671 | -0.87105 | -1.01113 | -1.23092 | -0.77081 | -0.79707 | -0.51129 | -0.21211 | -0.0521  | 0.20353  | 0.36152  | 0.66024  | 0.6678   | 0.9014   | 0.78256  | 0.71486  | 0.52974  | 0.24063  | 0.06765  | -0.30082 |
| PF14 0029a  | 0.83668  | -0.08569 | 0.02371  | -0.31921 | -0.29194 | -0.37606 | -0.4237  | -0.36588 | 0.04238  | 0.25476  | 0.08211  | 0.31588  | 0.05481  | 0.05917  | -0.19571 | -0.12549 | -0.09368 | 0.37321  | 0.63763  | 1.04967  | 1.17339  | 0.72778  | 0.95805  | 1.33275  |
| PF10 0053   | 0.55696  | 0.51617  | 0.38555  | 0.29668  | 0.12718  | 0.30488  | 0.29301  | 0.4163   | 0.3277   | 0.4864   | 0.31605  | 0.35252  | 0.26751  | 0.33396  | 0.21107  | 0.1056   | -0.01935 | 0.37794  | -0.07678 | 0.03422  | 0.26047  | 0.1989   | 0.22403  |          |
| PF10 0205   | 0.6345   | 0.86553  | 0.48653  | 0.86097  | 0.69377  | 0.57647  | 0.40824  | 0.20916  | -0.12195 | 0.04058  | 0.03962  | 0.03442  | 0.13792  | 0.1968   | 0.31061  | 0.06344  | 0.22422  | -0.14611 | -0.15686 | 0.1229   | 0.1495   | 0.16553  | 0.32426  | 0.38926  |
| PFE0985w    | -0.15632 | 0.12405  | 0.64729  | 0.86901  | 0.80362  | 0.99545  | 0.87438  | 0.771    | 0.84597  | 0.81409  | 0.8379   | 0.88224  | 0.79047  | 0.64769  | 0.52631  | 0.43411  | -0.03872 | -0.07549 | -0.16922 | -0.39406 | -0.60525 | -0.61397 | -0.5424  | -0.22283 |
| PFL1890c    | 0.39393  | 0.24805  | 0.16624  | 0.39675  | 0.4469   | 0.37438  | 0.23993  | 0.44505  | 0.40169  | 0.29705  | 0.25536  | 0.11036  | -0.02343 | -0.08344 | -0.25674 | -0.11038 | 0.08381  | -0.03611 | 0.57109  | 0.34856  | 0.44114  | 0.22535  | 0.36818  | 0.58415  |
| PFF0755c    | 0.3358   | 0.68384  | 0.06826  | 0.97997  | 0.90485  | 0.97589  | 0.83544  | 0.6924   | 0.59487  | 0.72107  | 0.64926  | 0.59884  | 0.57818  | 0.49697  | 0.27048  | 0.09034  | 0.23185  | -0.15556 | -0.24423 | -0.33635 | -0.24008 | -0.09994 | -0.13378 | -0.04328 |
| PFE0675c    | -0.94836 | -0.90699 | -1.07888 | -1.02054 | -1.2941  | -1.09327 | -0.97411 | -0.7485  | -0.31821 | -0.07877 | 0.19863  | 0.35222  | 0.56184  | 0.55411  | 0.58061  | 0.37001  | 0.27052  | 0.20878  | -0.43866 | -0.66078 | -0.6126  | -0.35309 | -0.55149 | -0.61198 |
| PF07 0091   | 0.13249  | 0.25226  | 0.53313  | 0.44994  | 0.42874  | 0.5041   | 0.39627  | 0.48026  | 0.2051   | 0.33236  | 0.3734   | 0.20076  | 0.01326  | -0.31252 | -0.25953 | -0.38054 | -0.59557 | -0.40675 | -0.3775  | -0.37805 | -0.46212 | -0.44199 | -0.25382 | -0.10319 |
| PFE1215c    | 0.61262  | 0.5466   | 0.55361  | 0.89229  | 0.68354  | 0.81974  | 0.66012  | 0.69183  | 0.73806  | 0.50767  | 0.62513  | 0.78933  | 0.17913  | 0.07941  | -0.21428 | -0.20098 | -0.68093 | -0.54516 | -0.13529 | -0.50946 | -0.29387 | -0.02756 | 0.19466  | 0.17632  |
| PF14 0544   | -0.42865 | -0.28605 | 0.07185  | 0.69273  | 1.13091  | 1.63422  | 1.86794  | 1.51831  | 1.17047  | 0.61687  | 0.29067  | -0.0599  | -0.2307  | -0.24549 | -0.24036 | -0.33817 | -0.28702 | -0.07946 | -0.01635 | -0.01978 | 0.16641  | -0.03635 | -0.11441 | 0.10723  |
| PFL0715w    | -0.57388 | -0.3769  | 0.06773  | -0.06815 | 0.26722  | 0.1199   | 0.27809  | 0.19177  | 0.2223   | 0.34258  | 0.47189  | 0.51893  | 0.46277  | 0.25887  | 0.24498  | 0.19114  | 0.19815  | 0.16227  | 0.38635  | 0.48424  | 0.68536  | 0.3401   | 0.87944  | 1.02154  |
| PFI0245c    | -0.01893 | -0.10064 | -0.21054 | -0.17705 | -0.07385 | -0.18088 | -0.29394 | -0.29153 | -0.06997 | 0.31091  | 0.48504  | 0.74991  | 0.62937  | 0.6565   | 0.67367  | 0.62214  | 0.49099  | 0.31513  | 0.57292  | 0.35915  | -0.19592 | -0.34386 | 0.12846  | -0.18033 |
| PF13 0143   | -0.62101 | -0.12367 | -0.00415 | 0.03579  | 0.0376   | -0.03825 | -0.0437  | 0.15518  | 0.36847  | 0.37001  | 0.50834  | 0.55801  | 0.60969  | 0.36573  | 0.26674  | 0.01976  | -0.46719 | -0.70852 | -1.01077 | -1.3419  | -1.47552 | -1.17385 | -1.17347 | -0.90371 |
| PFC0886w    | -1.15574 | -1.31058 | -1.26506 | -1.83285 | -1.90213 | -1.88474 | -1.65307 | -1.16853 | -0.10516 | -0.51811 | -0.0749  | 0.25199  | 0.61536  | 0.61434  | 0.82773  | 0.74565  | 0.15146  | 0.62028  | 0.26127  | -0.18468 | -0.58423 | -0.74443 | -0.75951 | -0.76434 |
| MAL8P1.24   | -0.19653 | -0.82582 | -1.39842 | -0.42663 | -0.4415  | 0.21695  | 0.68145  | 0.83329  | 1.27353  | 1.235    | 1.00151  | 1.1627   | 0.73496  | 0.61559  | 0.1245   | -0.0945  | -0.11752 | -0.37861 | -0.288   | -0.11623 | -0.10476 | -0.14107 | 0.19641  | 0.2108   |
| MAL7P1.83   | -0.63242 | -0.6904  | -0.59687 | -0.72345 | -0.86937 | -0.66381 | -0.2846  | -0.0147  | 0.07441  | 0.36349  | 0.73441  | 0.75794  | 0.81501  | 0.80562  | 0.78824  | 0.6974   | 0.52858  | 0.14284  | 0.15363  | -0.19729 | -0.35367 | -0.43572 | -0.68121 | -0.82357 |
| MAL13P1.92  | -0.64019 | -0.0274  | 0.26777  | 0.24015  | 0.35922  | 0.06472  | 0.06347  | 0.29517  | 0.29407  | 0.55452  | 0.66698  | 0.49563  | 0.34302  | 0.46596  | 0.24178  | -0.01393 | -0.31589 | -0.63904 | -1.32732 | -1.87162 | -1.51267 | -1.23031 | -1.16446 | -0.86012 |
| MAL7P1.91   | -0.55531 | -0.7112  | -0.90009 | -0.66595 | -0.57295 | -0.51034 | -0.56425 | -0.83639 | -0.73632 | -0.2205  | 0.00217  | 0.31093  | 0.6516   | 0.8726   | 0.71333  | 0.53366  | 0.55932  | 0.52297  | -0.34089 | 0.01551  | -0.13868 | -0.16224 | -0.23033 | -0.31473 |
| PF11 0053   | 0.08218  | 0.36827  | 0.44941  | 0.57188  | 0.57344  | 0.75532  | 0.72552  | 0.59227  | 0.37429  | 0.12437  | 0.09692  | -0.08806 | 0.09878  | 0.18481  | 0.2915   | 0.22313  | 0.13567  | -0.15587 | -0.23346 | -0.37774 | -0.2263  | -0.1     |          |          |

|               |          |          |          |          |          |          |          |          |          |          |          |          |          |          |          |          |          |          |          |          |          |          |          |          |
|---------------|----------|----------|----------|----------|----------|----------|----------|----------|----------|----------|----------|----------|----------|----------|----------|----------|----------|----------|----------|----------|----------|----------|----------|----------|
| MAL13P1.352   | 0.24173  | 0.57093  | 0.24458  | 0.86709  | 0.61546  | 0.8011   | 0.72947  | 0.61942  | 0.89414  | 0.77064  | 0.76985  | 0.6499   | 0.57792  | 0.45528  | 0.30641  | 0.06384  | -0.20996 | -0.38466 | -0.35244 | -0.86617 | -0.71314 | -0.44543 | -0.30849 | -0.08021 |
| PF10 0149     | -0.00718 | 0.28285  | 0.39843  | 0.61079  | 0.63041  | 0.69457  | 0.74148  | 0.719    | 1.03978  | 1.14416  | 1.10721  | 1.16194  | 0.84357  | 0.40123  | 0.08948  | -0.26524 | -0.73999 | -0.89557 | -0.87653 | -1.17043 | -1.00563 | -0.56523 | -0.50682 | -0.38562 |
| PF07 0028     | 0.18444  | 0.37964  | 0.97087  | 0.84661  | 0.72433  | 0.58907  | 0.41269  | 0.17205  | 0.23412  | 0.36275  | 0.30113  | 0.37492  | 0.32213  | 0.28472  | 0.082    | -0.08334 | -0.88574 | -0.06582 | -0.12184 | 0.03386  | 0.22419  | 0.32938  | 0.58435  | 0.85162  |
| PF11 0065     | -0.49427 | 0.07073  | 0.23596  | 0.34041  | 0.33222  | 0.63482  | 0.374    | 0.59684  | 0.55081  | 0.72226  | 0.3683   | 0.87603  | 0.66363  | 0.43145  | 0.20365  | -0.07324 | -0.62287 | -0.37751 | -1.09887 | -1.92115 | -1.87435 | -1.49667 | -1.34473 | -1.1341  |
| PFA0310c      | -0.4521  | -0.25123 | -0.17716 | -0.14618 | -0.12308 | -0.2911  | -0.32651 | -0.41443 | -0.36364 | -0.08794 | -0.01571 | 0.0705   | 0.35275  | 0.47804  | 0.61948  | 0.64646  | 0.49298  | 0.14712  | -0.00298 | -0.29194 | -0.40891 | -0.3109  | -0.49858 | -0.54275 |
| PFL0190w      | 1.35053  | 0.80366  | 0.21224  | 0.9598   | 0.70278  | 1.04742  | 0.65213  | 0.94963  | 0.89592  | 0.4144   | 0.27961  | 0.25605  | -0.10347 | -0.12483 | -0.30294 | -0.2396  | -0.6265  | 0.12563  | 1.06171  | 0.76955  | 0.94734  | 0.87427  | 1.01664  | 0.9715   |
| PFE0515w      | 0.97632  | 1.43514  | 1.24037  | 1.40767  | 1.4048   | 1.49379  | 1.32063  | 1.32937  | 1.06364  | 0.93984  | 0.86317  | 0.71905  | 0.47897  | 0.34409  | 0.166    | -0.07181 | -0.56909 | -0.58111 | -0.42815 | -0.71736 | -0.58108 | 0.22766  | 0.33001  | 0.51529  |
| PF08 0108     | 1.4559   | 0.70959  | 0.2084   | -0.53295 | -0.98794 | -1.21621 | -1.68457 | -2.58261 | -3.15494 | -3.82165 | -3.84041 | -3.68481 | -4.74079 | -4.83171 | -4.56067 | -3.46273 | -1.95433 | -0.64023 | 1.46228  | 0.9254   | 1.34264  | 1.69372  | 1.35223  | 1.61707  |
| MAL13P1.266   | -0.33158 | -0.38907 | -0.37851 | 0.18391  | 0.44071  | 0.33039  | 0.32636  | 0.31539  | -0.3608  | 0.20841  | 0.19639  | 0.26514  | 0.42945  | 0.57007  | 0.39587  | 0.38148  | 0.30042  | 0.25408  | -0.05884 | -0.11748 | -0.35711 | -0.58461 | -0.67587 | -0.57821 |
| PFL1260w      | 0.62365  | 0.61884  | 0.46335  | 0.56545  | 0.83387  | 0.97745  | 0.95871  | 1.13141  | 0.95378  | 0.70343  | 0.61316  | 0.36914  | 0.33171  | 0.12018  | 0.11536  | 0.10912  | 0        | -0.03112 | 0.13995  | -0.00974 | 0.19469  | 0.35075  | 0.33647  | 0.4549   |
| PF14 0431     | -0.04599 | -0.02479 | 0.14781  | 0.1943   | 0.43358  | 0.96575  | 1.32871  | 1.36007  | 1.09073  | 0.8036   | 0.66804  | 0.23758  | -0.07012 | -0.4964  | -0.799   | -1.11479 | -0.99162 | -1.21416 | -0.23785 | -0.46255 | -0.16364 | -0.27071 | 0.07995  | 0.23425  |
| MAL7P1.229    | 0.19601  | -0.3558  | -0.96506 | -0.80198 | -1.10585 | -1.26557 | -1.58394 | -1.8111  | -2.06313 | -2.36322 | -2.41183 | -2.30946 | -2.25082 | -1.49573 | -0.52308 | 0.47805  | 0.99636  | 0.89563  | 1.62529  | 1.42546  | 1.33568  | 0.95517  | 0.79942  | -0.0834  |
| PF14 0493     | -0.98681 | -1.17145 | -1.55701 | -1.84541 | -1.74111 | -1.90116 | -1.27852 | -0.73854 | -0.54388 | -0.47947 | -0.12419 | -0.0247  | 0.40586  | 0.45555  | 0.88084  | 0.85271  | 0.55004  | 0.70149  | 0.0277   | -0.1929  | -0.48341 | -0.56925 | -0.96494 | -1.01301 |
| PF11 0062     | -0.56284 | -0.63389 | -0.52613 | -0.8843  | -0.81677 | -0.7104  | -1.07319 | -1.17199 | -0.7767  | -0.6443  | -0.32606 | 0.36666  | 0.96863  | 1.29948  | 0.80538  | 0.806    | 0.26855  | 0.87781  | 0.80351  | 1.54951  | 0.23383  | -0.12566 | -0.32938 | -0.26134 |
| PFL0405w      | 1.01706  | 0.84764  | 0.97294  | 1.02138  | 0.889    | 0.79047  | 0.85787  | 0.7726   | 1.09934  | 1.00572  | 0.82784  | 0.68241  | 0.42519  | 0.24981  | -0.3149  | -0.57929 | -0.70467 | -0.71426 | -0.84027 | -0.43797 | -0.11462 | 0.10462  | 0.32201  | 0.46067  |
| PFC0535w      | -0.35006 | -0.02431 | 0.1864   | 0.21257  | -0.01505 | 0.39135  | 0.18368  | 0.28716  | 0.54917  | 0.42759  | 0.53384  | 0.635    | 0.29152  | 0.13447  | 0        | -0.17265 | -0.92928 | -0.67315 | -0.91135 | -1.42939 | -1.38504 | -0.96314 | -0.72987 | -0.7424  |
| PFL1375w      | 0.64767  | 0.80692  | 1.11873  | 1.10754  | 1.02096  | 1.17651  | 1.0687   | 1.10708  | 0.94459  | 0.87664  | 0.66971  | 0.63035  | 0.49795  | 0.37652  | 0.22898  | 0.0929   | -0.15894 | -0.28073 | -0.20016 | -0.14401 | -0.1466  | 0.20093  | 0.37137  | 0.25474  |
| PF14 0574     | 1.85358  | 1.34584  | 0.70742  | 1.73985  | 1.61421  | 1.31906  | 1.09544  | 1.19968  | 0.62192  | 0.19318  | -0.03703 | -0.09409 | -0.30291 | -0.50028 | -0.76568 | -0.84886 | -1.88058 | -1.17746 | 0.93449  | 1.10529  | 1.40722  | 1.26137  | 1.59125  | 1.21738  |
| PF14 0477     | 0.43454  | 0.74303  | 0.55303  | 0.84012  | 0.92563  | 0.82599  | 0.53844  | 0.45675  | 0.17798  | -0.04659 | -0.14827 | -0.23125 | -0.30718 | -0.49274 | -0.32271 | -0.35932 | -0.41497 | -0.39153 | -0.21011 | -0.22732 | -0.10537 | 0.01721  | 0.11573  | 0.20772  |
| MAL13P1.337   | -0.79462 | -0.50589 | -0.2614  | -0.79613 | -0.58592 | -0.42772 | -0.55178 | -0.17498 | -0.03188 | 0.15122  | 0.65212  | 0.72926  | 0.88648  | 0.59075  | 0.84265  | 0.56705  | 0.12239  | 0.06724  | 0.10437  | -0.58945 | -0.64193 | -0.78774 | -0.77868 | -0.66187 |
| PFC0355c      | 0.94399  | 0.17826  | -0.38788 | -0.87908 | -1.18729 | -1.86129 | -2.09601 | -2.3418  | -2.94887 | -3.25811 | -3.36053 | -3.61451 | -3.91285 | -4.05531 | -3.51253 | -2.65149 | -1.29648 | 0.20371  | 1.59727  | 1.31112  | 1.30699  | 1.08043  | 1.24267  | 1.11384  |
| PF14 0522     | -0.00764 | -0.09061 | -0.64636 | 0.66895  | 0.81412  | 1.01501  | 0.78432  | 0.92999  | 0.66223  | 0.10909  | 0.35142  | -0.07972 | -0.08869 | -0.08073 | -0.10232 | -0.15591 | -0.19537 | 0.19962  | 0.66472  | 0.621    | 0.88761  | 1.05586  | 1.48084  | 1.46046  |
| MAL7P1.141    | 0.71305  | 0.22867  | -0.6684  | -1.47781 | -1.90501 | -2.64432 | -3.02238 | -3.63361 | -4.57042 | -4.95708 | -4.99592 | -5.38561 | -5.56474 | -5.7782  | -4.55163 | -3.29171 | -1.29222 | -0.63391 | 1.53983  | 1.55625  | 1.23714  | 0.51087  | 1.5263   | 1.71013  |
| PF11 0369     | -0.37937 | 0.1447   | 0.59888  | 0.20514  | 0.31583  | 0.44664  | 0.45819  | 0.83814  | 0.56132  | 0.68582  | 0.91437  | 0.62784  | 0.57419  | -0.00119 | 0.15303  | -0.17771 | -0.31854 | -0.66717 | -0.4702  | -0.67345 | -0.56845 | -0.36271 | -0.15317 | 0.05693  |
| PFE1185w      | 1.61212  | 1.63663  | 1.3741   | 1.97801  | 1.95567  | 1.72761  | 1.54918  | 1.13522  | 0.52958  | 0.0898   | -0.08859 | -0.1206  | -0.12099 | 0.0396   | 0.12632  | 0.08416  | -0.12923 | -0.02079 | -0.12769 | -0.00348 | 1.37475  | 0.45258  | 0.71955  | 0.7995   |
| PF11 0508     | -1.04234 | -2.37097 | -1.37198 | -1.53794 | -1.3972  | -1.07617 | -0.72887 | -0.14426 | 0.42472  | 0.81198  | 1.32771  | 0.7188   | 1.08316  | 0.84882  | 0.26722  | -0.29453 | -0.44078 | -1.12418 | -2.13593 | -2.14658 | -2.66309 | -2.61665 | -2.61321 | -2.61638 |
| PFC10 API0038 | -0.5078  | -1.0839  | -0.968   | -1.48014 | -1.13183 | -1.40096 | -1.40396 | -1.23884 | -1.01198 | -0.79366 | -0.84109 | -0.45123 | -0.41161 | 0.03925  | 0.13307  | 0.65822  | 0.57914  | 1.06303  | -0.02809 | 0.24188  | 0.05236  | 0.7922   | 0.01364  | -0.19372 |
| PF14 0140     | 0.62085  | 0.28394  | 0.147    | -0.03796 | 0.00539  | -0.17753 | -0.33927 | -0.28323 | -0.5196  | -0.51479 | -0.5898  | -0.59437 | -0.88569 | -0.99559 | -0.89299 | -0.69574 | -0.50062 | -0.26655 | 0.63567  | 0.46201  | 0.51382  | 0.41683  | 0.5807   | 0.82746  |
| FFF1000w      | 0.71754  | 0.66951  | 0.71368  | 0.75505  | 0.80654  | 0.84714  | 0.64378  | 0.63278  | 0.8289   | 0.34999  | 0.47878  | 0.30928  | 0.30431  | 0.26443  | 0.19491  | 0.04274  | 0.09543  | 0.0204   | 0.46813  | 0.31633  | 0.24681  | 0.18641  | 0.48886  | 0.38489  |
| PF11 0540a    | 0.12129  | 0.21584  | 0.49908  | 0.18814  | 0.47669  | 0.35217  | 0.18218  | 0.07751  | -0.11709 | 0.10492  | 0.1269   | 0.11681  | 0.15309  | 0.0994   | -0.09499 | -0.19384 | 0.50968  | 0.01533  | 0.0787   | 0.43967  | 0.75817  | 0.649    | 0.92804  | 0.97671  |
| PF10 0315     | -0.58092 | -0.43302 | -0.24332 | -0.22875 | -0.08582 | -0.17847 | 0.19565  | 0.62551  | 0.61584  | 0.79871  | 0.80165  | 0.85378  | 0.61869  | 0.46955  | 0.13214  | -0.15524 | -0.21586 | -0.38042 | -0.47634 | -0.36397 | -0.248   | -0.31751 | -0.23208 | -0.14587 |
| PF08 0127     | 0.31054  | 0.92767  | 0.70244  | 0.75443  | 0.60802  | 0.50568  | 0.53887  | 0.60432  | 0.74014  | 0.84365  | 0.48046  | 0.53407  | 0.38827  | 0.29049  | 0.05548  | -0.49337 | -0.30817 | -0.73392 | -0.81707 | -0.72757 | -0.67397 | -0.00038 | 0.19652  | 0.41593  |
| PF10 0127     | 0.41009  | 0.14495  | -0.03976 | 0.20519  | 0.31933  | 0.0703   | 0.22263  | 0.55576  | 0.35845  | 0.15702  | 0.06668  | -0.00374 | -0.42869 | -0.64417 | -0.37751 | 0.03095  | 0.24944  | 0.50518  | 0.73069  | 0.65358  | 0.64178  | 0.44559  | 0.47828  | 0.49023  |
| PFB0635w      | -0.04211 | 0.2569   | 0.1346   | 0.44693  | 0.41552  | 0.43441  | 0.49801  | 0.80004  | 0.94061  | 1.12658  | 1.35225  | 1.33559  | 1.00165  | 0.54447  | 0.15185  | -0.25701 | -0.89642 | -0.86183 | -1.02638 | -1.18488 | -0.90785 | -0.60714 | -0.49682 | -0.27616 |
| PF08 0088     | 0.22592  | 0.40246  | -0.17105 | 0.5755   | 0.64508  | 0.33036  | 0.1833   | 0.50883  | 0.19543  | 0.21302  | 0.15738  | -0.03567 | 0.02833  | -0.05668 | 0.05211  | 0.19924  | 0.27464  | 0.47025  | 1.14249  | 0.64846  | 0.72212  | 0.29165  | 0.40658  | 0.28731  |
| PF14 0761     | 2.0652   | 1.88142  | 1.31656  | 1.44926  | 1.35234  | 0.99224  | 0.49615  | 0.20197  | -0.63966 | -1.0072  | -1.13469 | -1.18634 | -1.44485 | -1.566   | -1.12878 | -1.64728 | -1.19802 | -1.37156 | 0.17442  | 0.89047  | 1.22408  | 1.27621  | 1.69516  | 1.72786  |
| PFB0575c      | 0.02582  | 0.01163  | 0.4314   | 0.23584  | 0.38845  | 0.8554   | 1.0033   | 1.11834  | 0.92039  | 0.75774  | 0.68952  | 0.67713  | 0.61969  | 0.4777   | 0.44382  | 0.2923   | 0.21285  | 0.16221  | 0.04284  | -0.0204  | -0.23296 | -0.15705 | -0.07767 | 0.04998  |
| PFB0815w      | -0.16348 | -0.91402 | -1.00698 | -1.27624 | -1.7284  | -2.02245 | -2.23179 | -2.37043 | -2.75879 | -3.09245 | -3.03509 | -2.98303 | -2.73349 | -2.45312 | -1.23272 | -0.30411 | 0.4407   | 0.29391  | 1.37502  | 1.26507  | 1.01966  | 0.6101   | 0.87186  | 0.65414  |
| PFL1835w      | 1.05157  | 0.67626  | 0.30303  | 0.23539  | -0.17518 | -0.28764 | -0.30413 | -0.56988 | -0.21186 | -0.34095 | -0.63124 | -0.62234 | -0.74378 | -0.98839 | -1.46635 | -1.66772 | -1.15385 | -0.77902 | 0.18829  | 0.7212   | 0.9847   | 1.05876  | 1.31647  | 1.03588  |
| PF10 0098     | 1.01615  | 1.04278  | 0.51236  | 0.90602  | 0.86342  | 0.36275  | 0.01671  | 0.11869  | -0.39348 | -0.50491 | -0.55986 | -0.68894 | -0.76535 | -0.87131 | -0.84346 | -0.81057 | -1.03098 | -0.68348 | -0.34933 | 0.35456  | 0.78369  | 0.70004  | 1.08701  | 1.38821  |
| PFE0635c      | -0.62285 | -0.23153 | -0.16603 | 0.22466  | 0.46926  | 0.81936  | 0.85601  | 0.96383  | 1.33858  | 1.29058  | 1.28654  | 1.11804  | 0.9798   | 0.62615  | 0.36479  | 0.05822  | 0.0341   | -0.32335 | -0.58883 | -0.60419 |          |          |          |          |



|               |          |          |          |          |          |          |          |          |          |          |          |          |          |          |          |          |          |          |          |          |          |          |          |          |
|---------------|----------|----------|----------|----------|----------|----------|----------|----------|----------|----------|----------|----------|----------|----------|----------|----------|----------|----------|----------|----------|----------|----------|----------|----------|
| PF10 0246     | -0.8544  | -1.22014 | -0.92336 | -0.68264 | -0.61858 | -0.23877 | 0.3094   | 0.33225  | 0.79429  | 0.65056  | 0.63377  | 0.70228  | 0.74004  | 0.78255  | 0.70704  | 0.55593  | 0.36711  | 0.12754  | 0.0736   | -0.35844 | -0.72052 | -0.80463 | -0.91784 | -0.99976 |
| PFIO370c      | -0.19143 | 0.25862  | 0.35201  | 0.29891  | 0.04528  | 0.28343  | 0.40214  | 0.33887  | 0.26694  | 0.22718  | 0.33151  | 0.41485  | 0.20533  | -0.16116 | -0.06865 | -0.0535  | -0.29393 | -0.26673 | -0.17479 | -0.6518  | -0.58158 | -0.28444 | -0.55501 | -0.41924 |
| PF08 0107     | 0.64309  | 0.73077  | 0.84554  | 0.58285  | 1.2206   | 0.48089  | 0.79698  | 0.75785  | 0.98636  | 0.88892  | 0.46886  | 0.7808   | 0.53306  | 0.46776  | 0.30258  | 0.12735  | -0.1931  | 0.19367  | 0.29842  | 0.16613  | 0.13112  | -0.04179 | 0.05708  | 0.28817  |
| MAL8P1.25     | 0.22727  | 0.37537  | 0.35278  | 0.74677  | 0.19076  | 0.13223  | 0.69619  | 0.79018  | 0.62952  | 0.3273   | 0.29688  | 0.3907   | 0.25991  | 0.1517   | 0.08824  | 0.0728   | 0.34246  | -0.00127 | 0.23642  | 0.20587  | 0.46307  | 0.58798  | 0.67989  | 0.76719  |
| PF14 0681     | -0.19271 | -0.66914 | -0.76532 | -1.07697 | -1.27888 | -1.2743  | -1.4289  | -1.48073 | -1.56016 | -1.45865 | -1.23802 | -0.86753 | -0.45299 | -0.20488 | 0.33429  | 0.71213  | 0.79603  | 0.53958  | 1.22213  | 0.63872  | 0.62633  | 0.4521   | 0.44937  | 0.04517  |
| PFE0450w      | -1.20909 | -1.30273 | -1.1628  | -1.79584 | -1.96828 | -2.05834 | -2.1209  | -2.24759 | -1.56645 | -0.95817 | -0.44827 | 0.15264  | 0.68919  | 1.01788  | 1.05699  | 0.84934  | 0.74628  | 0.58204  | -0.24646 | -0.06379 | -0.30038 | -0.66814 | -1.11519 | -1.44205 |
| MAL8P1.64     | 0.44981  | 0.73713  | 0.6958   | 0.58685  | 0.49736  | 0.4146   | 0.43771  | 0.364    | 0.49328  | 0.39863  | 0.3268   | 0.28424  | 0.18756  | 0.080754 | -0.25719 | -0.59981 | -0.72323 | -0.94631 | -1.21557 | -0.92062 | -0.60831 | -0.2923  | -1.04608 | 0.10378  |
| PF08 0014     | -0.9228  | -0.95601 | -0.76557 | -1.56567 | -1.56427 | -1.61559 | -1.4942  | -1.11053 | -0.68952 | -0.31422 | 0.13136  | 0.54166  | 0.74244  | 0.77132  | 0.91933  | 0.76779  | 0.31284  | 0.40196  | 0.13483  | -0.31482 | -0.42383 | -0.66482 | -0.89623 | -1.04649 |
| PF11 0258     | -0.51432 | -0.29172 | -0.21693 | 0.07417  | 0.40539  | 0.50411  | 0.70791  | 1.15861  | 1.2446   | 1.25657  | 1.38259  | 1.23692  | 0.79548  | 0.24342  | -0.15902 | -0.4507  | -0.93208 | -0.98461 | -0.53243 | -0.8227  | -0.67608 | -0.5749  | -0.46218 | -0.32997 |
| PF11 0108     | 0.63966  | 0.85192  | 0.596    | 0.32773  | 0.25901  | 0.25343  | 0.08072  | 0.21948  | 0.25019  | 0.39725  | 0.35353  | 0.33579  | 0.23138  | 0.04973  | 0.01571  | 0.0488   | -0.67174 | 0.11673  | -0.18899 | -0.24477 | -0.06944 | 0.5466   | 0.16039  | 0.26488  |
| PF1455c       | 0.00475  | 0.31651  | 0.08363  | -0.05906 | -0.31466 | -0.55003 | -0.61814 | -0.87731 | -0.80616 | -0.85515 | -0.79928 | -0.80353 | -0.80064 | -0.75701 | -0.63184 | -0.2778  | 0.29494  | 0.09158  | 1.69894  | 1.15459  | 1.30883  | 0.52207  | 0.93398  | 0.62045  |
| PFIO430c      | 0.04764  | -0.07414 | 0.09961  | -0.20579 | 0.27885  | 0.27109  | 0.90215  | 1.01746  | 0.19065  | 1.14383  | 0.71887  | 0.82688  | 0.67523  | 0.53302  | 0.29074  | 0.17175  | 0.12096  | 0.00584  | 0.17089  | 0.03987  | -0.22427 | -0.21242 | 0.08694  | 0.11574  |
| PF11 0408     | -0.30014 | -0.29668 | -0.03925 | -0.13273 | -0.02975 | -0.1379  | -0.19142 | -0.30086 | -0.3732  | -0.08685 | 0.04151  | 0.17984  | 0.26893  | 0.44591  | 0.40146  | 0.38969  | 0.35155  | 0.1868   | -0.12944 | -0.07898 | -0.27788 | -0.37492 | -0.57738 | -0.44667 |
| PFC0550w      | -0.94226 | -0.95877 | -0.783   | -0.96691 | -0.56035 | -0.29315 | -0.0703  | 0.29871  | 0.53692  | 0.6557   | 0.6566   | 0.73882  | 0.87386  | 0.81604  | 0.57402  | 0.32096  | 0.19572  | 0.09761  | -0.29091 | -0.39213 | -0.69234 | -0.79946 | -0.90771 | -0.86922 |
| PFD1110w      | -0.1589  | -0.81079 | -0.57646 | -1.33129 | -1.72061 | -1.8366  | -1.95843 | -2.12516 | -2.345   | -2.65748 | -2.52712 | -2.44481 | -2.15396 | -1.68412 | -0.61264 | 0.42519  | 1.08824  | 1.14588  | 1.30049  | 0.94178  | 0.77251  | 0.49332  | 0.23924  | -0.30191 |
| PF14 0384     | 0.22049  | 0.33285  | 0.48606  | 0.74756  | 0.87233  | 1.446    | 1.52738  | 1.72569  | 1.53612  | 1.20092  | 0.98323  | 0.55876  | 0.3193   | 0.27855  | 0.13742  | 0.13502  | 0.00804  | 0.02801  | 0.30152  | 0.07621  | 0.3123   | 0.30501  | 0.33807  | 0.4775   |
| PFD1037w      | -0.64315 | -0.45271 | -0.14455 | 0.2272   | 0.03578  | 0.21074  | 0.32436  | 0.1336   | 0.18705  | 0.23236  | 0.46753  | 0.61645  | 0.72513  | 0.6989   | 0.57384  | 0.44753  | 0.20369  | -0.30846 | -0.19598 | -0.69736 | -0.92437 | -0.84721 | -1.13551 | -0.78816 |
| PFL0305c      | 0.6043   | 0.23784  | 0.11562  | 0.31455  | 0.23393  | 0.11151  | -0.14443 | -0.3528  | -0.67435 | -0.59332 | -0.45354 | -0.59988 | -0.45329 | -0.57151 | -0.41161 | -0.08641 | 0.37192  | 0.40139  | 1.10208  | 0.81997  | 0.78831  | 0.589    | 0.81256  | 0.59416  |
| PFC0315c      | -0.95966 | -1.09423 | -1.49078 | -1.15019 | -1.22259 | -1.20556 | -1.06896 | -1.10538 | -0.80931 | -0.2743  | 0.05408  | 0.20136  | 0.66796  | 0.509    | 0.76882  | 0.73102  | 0.52629  | 0.45015  | 0.62894  | 0.13342  | -0.09665 | -0.35289 | -0.50218 | -0.70346 |
| PF1435w       | 0.09072  | 0.562    | 0.21797  | 0.39466  | 0.37841  | 0.29378  | 0.11198  | 0.26011  | 0.07911  | 0.06373  | 0.28861  | 0.17507  | 0.14341  | -0.17158 | -0.05008 | -0.21155 | -0.62639 | -0.35203 | -0.30264 | -0.368   | -0.28251 | -0.21689 | -0.07548 | 0.09236  |
| PFI030c       | -0.37206 | -0.59977 | -0.36371 | -0.28428 | -0.4462  | -0.43728 | -0.65018 | -0.75749 | -0.51952 | -0.20588 | 0.27898  | 0.62239  | 0.76411  | 0.73089  | 0.75582  | 0.64367  | 0.25587  | 0.18572  | 0.15122  | -0.11702 | -0.37988 | -0.49573 | -0.60667 | -0.69091 |
| MAL13P1.105   | -0.35289 | -0.54682 | -0.21382 | -0.23094 | -0.27414 | -0.34862 | -0.44592 | -0.57951 | -0.39194 | 0.18219  | 0.3437   | 0.51935  | 0.724    | 0.71797  | 0.72676  | 0.55581  | 0.51468  | 0.3703   | 0.41689  | 0.26902  | 0.17057  | -0.02378 | 0.06776  | 0.13882  |
| PF1720w       | 1.78408  | 1.91965  | 1.3586   | 1.61368  | 1.2035   | 0.79747  | 0.28389  | 0.10051  | -0.79657 | -1.4088  | -1.50869 | -1.99453 | -2.07503 | -2.55941 | -2.37789 | -2.61265 | -1.99777 | -1.87282 | -1.00979 | -0.11073 | 0.68318  | 0.96931  | 1.16862  | 1.37916  |
| PFI0515w      | 0.81964  | 0.30634  | 0.12946  | 0.07372  | 0.0239   | 0.18596  | 0.15452  | 0.27473  | -0.06369 | 0.06902  | 0.04456  | -0.3916  | -0.1603  | -0.39078 | -0.50894 | -0.38997 | -0.27067 | 0.01575  | 1.40725  | 0.83805  | 0.92819  | 0.85135  | 1.06581  | 0.95001  |
| PFD0855c      | 0.0346   | -0.16728 | -0.23371 | -0.34202 | -0.37766 | -0.28356 | -0.44885 | -0.66308 | -0.54428 | -0.4785  | -0.51719 | -0.37381 | -0.1615  | -0.01067 | 0.25613  | 0.51983  | 0.85911  | 0.54229  | 0.52104  | 0.44419  | 0.38353  | 0.31543  | 0.15392  | 0.07457  |
| PFL0250w      | 0.71368  | -0.02837 | -0.05587 | -0.11331 | -0.06732 | 0.01018  | -0.27156 | -0.73091 | 0.04434  | -0.67802 | -0.59855 | -0.32187 | -0.09745 | 0.13506  | 0.26733  | 0.43473  | 0.5479   | 0.95287  | 0.84076  | 0.91554  | 0.96177  | 0.61393  | 0.55806  | 0.47586  |
| PF14 0171     | 0.29365  | -0.14034 | -0.48799 | -0.66759 | -0.78595 | -1.11232 | -1.20597 | -1.56872 | -1.77515 | -1.80412 | -1.84623 | -1.57228 | -1.31565 | -0.85353 | -0.28978 | 0.19728  | 0.80352  | 0.80312  | 0.68711  | 1.02578  | 0.93559  | 0.6104   | 0.43738  | 0.05309  |
| PFB0240w      | 0.46721  | 0.59771  | 0.69114  | 0.78205  | 0.77827  | 0.80528  | 0.69088  | 0.81458  | 0.79167  | 0.73612  | 0.85653  | 0.75814  | 0.74543  | 0.36047  | 0.31741  | 0.10384  | -0.40134 | -0.38169 | -0.46265 | -0.79994 | -0.65712 | -0.2986  | -0.03587 | 0.20116  |
| PF14 0392     | 0.44469  | 0.12567  | -0.16487 | -0.08612 | -0.22441 | -0.51008 | -0.73869 | -0.80518 | -0.88247 | -1.13651 | -1.20663 | -1.08061 | -0.94243 | -0.42174 | 0.17635  | 0.65645  | 0.86122  | 1.17484  | 0.75614  | 1.14785  | 1.10391  | 0.67919  | 0.48069  | -0.14933 |
| PF14 0554     | 0.10239  | 0.34864  | 0.39081  | 0.29984  | 0.20898  | -0.00955 | -0.09267 | -0.28223 | -0.97024 | -1.03084 | -0.54226 | -0.30123 | -0.12085 | 0.02789  | 0.42537  | 0.468    | 0.15881  | 0.24765  | -0.10197 | -0.15131 | -0.29509 | -0.26642 | -0.30352 | -0.06252 |
| PFF0480w      | 1.22792  | 1.21355  | 0.93172  | 1.02245  | 0.92407  | 0.43671  | 0.32023  | 0.08065  | -0.14525 | -0.51264 | -0.90129 | -1.3812  | -1.60094 | -1.8119  | -1.67238 | -1.14805 | -0.31883 | -0.37226 | 0.05407  | 0.49477  | 0.89405  | 0.97796  | 1.06018  | 1.03827  |
| PFE1120w      | -0.17648 | -0.66584 | -0.66068 | -1.17613 | -1.30758 | -1.46968 | -1.63519 | -1.8458  | -2.08833 | -2.40753 | -2.65154 | -2.70791 | -2.53181 | -1.91787 | -1.07016 | 0.05126  | 1.12443  | 0.97301  | 0.54643  | 0.92764  | 0.93253  | 0.84593  | 0.4814   | 0.00612  |
| MAL13P1.117   | 0.79752  | 0.65474  | 0.59366  | 0.55838  | 0.64227  | 0.43294  | 0.44606  | 0.6045   | 0.20505  | 0.10729  | 0.06069  | -0.02354 | 0.07928  | 0.10379  | 0.2153   | 0.05495  | -0.22721 | 0.04216  | 0.89166  | 0.486    | 0.58749  | 0.55641  | 0.60175  | 1.16051  |
| PF11 0377     | -0.09368 | -0.25958 | -0.38581 | -0.56046 | -0.68335 | -0.7596  | -0.78082 | -0.89618 | -1.29079 | -0.94074 | -0.68021 | -0.69509 | -0.49275 | -0.27989 | -0.06803 | 0.01123  | 0.20365  | 0.06016  | 0.48706  | 0.30554  | 0.18363  | 0.33482  | 0.30907  | 0.26843  |
| PFC10 API0033 | -0.63056 | -1.12837 | -1.34325 | -1.9339  | -1.73374 | -2.04803 | -2.0063  | -1.70181 | -1.39536 | -1.19329 | -1.03776 | -0.6881  | -0.51659 | -0.05824 | 0.19817  | 0.604    | 0.70969  | 1.19296  | -0.25616 | 0.11512  | -0.05477 | 0.43744  | -0.53001 | -0.5344  |
| PF08 0117     | -0.33744 | 0.16535  | 0.51748  | 0.72833  | 0.69992  | 0.95837  | 1.02461  | 0.91489  | 1.07721  | 0.99344  | 0.74418  | 0.8749   | 0.73098  | 0.62672  | 0.43127  | 0.13153  | 0.2033   | -0.21917 | -0.67884 | -0.65444 | -0.83105 | -0.53661 | -0.44366 | -0.34444 |
| PFF0845c      | 0.68976  | 1.19427  | 1.27601  | 0.67844  | 2.39416  | 2.71668  | 1.53505  | 2.4566   | 1.85939  | 1.14837  | 0.58419  | 0.30559  | 0.0462   | -0.12536 | -0.21533 | -0.29958 | -0.15544 | -0.5839  | 0.73258  | -0.03429 | -0.00613 | 0.05809  | 0.10695  | 0.72325  |
| MAL13P1.306   | 0.49497  | -0.02487 | -0.46534 | -0.70822 | -1.1898  | -1.48928 | -1.89247 | -2.08535 | -2.78448 | -3.14035 | -3.48562 | -3.66936 | -3.63038 | -3.43876 | -2.40069 | -1.09257 | 0.13334  | 0.65117  | 1.47373  | 1.12781  | 1.04048  | 1.20496  | 1.00817  | 0.71978  |
| PF13 0120     | -0.40184 | -0.39757 | -0.64281 | -0.87374 | -1.17679 | -1.34004 | -1.49918 | -1.71536 | -2.00073 | -1.83189 | -1.94961 | -1.72787 | -1.39926 | -0.85767 | 0.03641  | 0.56327  | 1.0965   | 0.86864  | 0.60546  | 0.75496  | 0.84873  | 0.52414  | 0.16248  | -0.41201 |
| PF14 0556     | 0.36179  | -0.18657 | -0.45607 | -0.65668 | -1.22903 | -1.31064 | -1.47283 | -1.58347 | -1.44178 | -1.36967 | -1.01353 | -0.46789 | -0.16549 | 0.1206   | 0.28954  | 0.65798  | 0.70198  | 0.87279  | 1.04372  | 0.9046   | 0.91859  | 0.54921  | 0.28179  | -0.44199 |
| PFD0525w      | 0.02517  | -0.14022 | -0.17038 | 0.13451  | 0.01154  | 0.21666  | 0.42439  | 0.8395   | 0.87009  | 0.95898  | 1.1364   | 0.87325  | 0.33861  | -0.11683 | -0.52185 | -0.64204 | -0.6613  | -0.36463 | 0.62812  | 0.1036   |          |          |          |          |

| PFC10_API0026:t | RNA      | 0.14827  | -0.64475 | -1.17767 | -0.68029 | -0.3258  | -0.40379 | -0.97652 | -0.0516  | -0.90793 | -0.82766 | -0.72167 | -0.71788 | -0.77621 | -0.17925 | -0.12093 | 0.75933  | 0.90765  | 0.98153  | 0.74444  | 0.56078  | 0.79489  | 1.40264  | 0.72386  | 0.42027 |
|-----------------|----------|----------|----------|----------|----------|----------|----------|----------|----------|----------|----------|----------|----------|----------|----------|----------|----------|----------|----------|----------|----------|----------|----------|----------|---------|
| PFL1365w        | 0.11014  | -0.47492 | -0.5415  | -0.78829 | -0.85278 | -0.97791 | -0.70866 | -0.15718 | 0.32674  | 0.61369  | 0.69415  | 0.71279  | 0.5746   | 0.45372  | 0.10463  | -0.07047 | -0.13332 | -0.42609 | 0.40447  | 0.11117  | 0.28744  | 0.16403  | 0.36567  | 0.76205  |         |
| PF14_0356       | 0.07055  | -0.00829 | -0.11792 | -0.22426 | -0.32117 | -0.5567  | -0.32214 | 0.00932  | 0.45296  | 0.74106  | 0.86585  | 0.82483  | 0.74707  | 0.63529  | 0.31864  | 0.21797  | -0.10921 | 0.00738  | -0.12948 | -0.27319 | -0.21025 | -0.27076 | -0.26852 | -0.13406 |         |
| PF14_0517       | -0.91535 | -0.59329 | -0.53177 | -0.35671 | -0.26805 | -0.27501 | -0.04116 | 0.12097  | 0.45677  | 0.70727  | 0.68158  | 0.66487  | 0.65278  | 0.42936  | 0.07246  | -0.40926 | -0.76742 | -0.96627 | -1.2357  | -1.32512 | -1.33365 | -1.26817 | -1.19832 | -0.92037 |         |
| PF14_0758       | -1.71478 | -1.39027 | -0.93584 | -0.54146 | 0.19059  | 1.38282  | 2.3403   | 2.36507  | 2.3336   | 2.07631  | 1.46344  | 0.60012  | -0.19009 | -0.81359 | -1.46924 | -1.99023 | -1.80006 | -1.95175 | -2.50618 | -2.42848 | -1.46842 | -1.99236 | -1.84393 | -1.11773 |         |
| PF13_0082       | -0.47596 | -0.09922 | -0.17126 | -0.19792 | -0.11899 | 0.11021  | 0.28692  | 0.07418  | 0.01877  | 0.01273  | 0.41331  | 0.34607  | 0.53098  | 0.43143  | 0.67694  | 0.50734  | 0.13081  | 0.17101  | 0.00148  | -0.40592 | -0.6264  | -0.89808 | -1.01543 | -0.82293 |         |
| PF14_0342       | -0.14933 | 0.01344  | 0.41301  | -0.05355 | 0.28867  | 0.28579  | 0.25694  | 0.2329   | 0.12098  | 0.29788  | 0.13609  | 0.15994  | 0.32003  | 0.51468  | 0.25999  | 0.15621  | 0.18479  | 0.11802  | -0.53168 | -0.17924 | -0.34966 | -0.1718  | -0.24823 | -0.02382 |         |
| PFL1960w        | 0.44434  | 0.08097  | 0.0453   | 0.71789  | -0.02932 | 0.19682  | 0.59386  | -0.22457 | -0.02766 | 0.35744  | -0.0118  | 0.14058  | 0.33476  | 0.2292   | -0.21564 | 0.32323  | -0.12197 | 0.04391  | -0.1627  | -0.12283 | -0.17286 | -0.23118 | -0.11273 | -0.26563 |         |
| PFL1775c        | -0.44493 | -0.50561 | -0.52347 | 0.01536  | 0.23774  | 0.38092  | 0.27766  | 0.63048  | 0.54331  | 0.73765  | 0.69754  | 0.89     | 0.64069  | 0.51512  | 0.49981  | 0.48237  | 0.16987  | 0.43501  | 0.57203  | 0.24976  | 0.06312  | -0.47922 | -0.55573 | -0.71588 |         |
| PFL2150c        | 0.13566  | 0.42798  | 0.30627  | 0.67423  | 0.6922   | 0.77808  | 0.62872  | 0.65888  | 0.87858  | 0.71115  | 0.90602  | 0.62819  | 0.57155  | 0.33784  | 0.05543  | -0.18448 | -0.79921 | -0.43752 | -0.43054 | -0.76393 | -0.54231 | -0.23092 | 0.04077  | 0.52777  |         |
| PF13_0144       | 0.99475  | 0.78327  | 0.72914  | 0.86505  | 0.93003  | 0.87056  | 0.81271  | 0.7054   | 0.46146  | 0.54463  | 0.44062  | 0.3228   | 0.32122  | 0.13521  | 0.07324  | 0.05341  | -0.07385 | 0.30468  | 0.59246  | 0.23347  | 0.56363  | 0.59858  | 0.51538  | 0.89707  |         |
| PFL0400w        | -0.21655 | -0.21604 | -0.42164 | 0.15322  | -0.00243 | 0.12479  | 0.44536  | 0.42989  | 0.64974  | 0.65883  | 0.63097  | 0.54694  | 0.59986  | 0.52343  | 0.46653  | 0.32883  | 0.34164  | -0.10416 | 0.37379  | 0.06485  | 0.03318  | 0.16769  | 0.06018  | 0.10786  |         |
| MAL8P1.6        | 0.22923  | 0.36527  | 0.19534  | 0.21019  | 0.44653  | 0.22679  | 0.08758  | -0.16592 | -0.4317  | -0.62537 | -0.33731 | -0.46444 | -0.22693 | -0.21255 | 0.20457  | 0.32654  | 0.82987  | 0.41932  | 0.96028  | 0.79921  | 0.82869  | 0.5335   | 0.77974  | 0.8419   |         |
| PF14_0584       | 1.15084  | 1.13892  | 0.89327  | 1.51359  | 1.45166  | 1.46767  | 1.17493  | 1.21719  | 1.29577  | 0.91019  | 0.95201  | 0.59283  | 0.18655  | -0.10988 | -0.123   | -0.61615 | -0.73236 | -0.68952 | -0.57422 | -0.5942  | -0.23545 | 0        | 0.31639  | 0.7327   |         |
| PF13_0353       | -0.27185 | -0.3374  | -0.51012 | -0.46374 | -0.67307 | -0.96459 | -1.30306 | -0.92226 | -0.85973 | -0.47276 | -0.20597 | -0.09167 | 0.26409  | 0.35818  | 0.92387  | 0.88476  | 1.06465  | 0.55715  | 0.72015  | 0.26935  | 0.09983  | -0.14505 | -0.45533 | -0.59988 |         |
| PFE0650c        | 0.49834  | 0.16988  | -0.50095 | -0.18081 | -0.54781 | -0.40987 | -0.65457 | -0.74317 | -0.7398  | -0.67205 | -0.78336 | -0.67498 | -0.76524 | -0.55252 | 0.04329  | 0.5486   | 0.53019  | 0.80453  | 1.43198  | 1.0081   | 0.86856  | 0.553    | 0.4059   | 0.03294  |         |
| PF14_0695       | 0.34965  | 0.07679  | -0.60376 | -0.52125 | -0.61069 | -0.86508 | -0.97152 | -0.72311 | -0.44811 | -0.43186 | -0.38459 | -0.18325 | -0.10595 | -0.01295 | 0.08246  | 0.1246   | 0.02189  | 0.43553  | 0.88615  | 0.87204  | 0.97589  | 0.66703  | 0.78674  | 0.37781  |         |
| PFL1880w        | 0.41998  | 0.50266  | 0.16983  | 0.14073  | -0.1659  | -0.30408 | -0.49732 | -0.32646 | -0.12514 | -0.02242 | 0.06856  | 0.2545   | 0.10731  | -0.01295 | -0.06308 | -0.20345 | -0.31096 | -0.22582 | -0.29433 | -0.04022 | 0.10594  | 0.13938  | 0.14971  | 0.12763  |         |
| PF11_0008       | 0.20203  | 0.53563  | 0.63165  | 0.79422  | 0.58825  | 0.5774   | 0.91413  | 0.81811  | 0.83936  | 0.6554   | 0.46398  | 0.21187  | 0.26382  | 0.26515  | 0.2104   | 0.29601  | 0.0584   | -0.27549 | 0.04867  | 0.00612  | 0.05201  | -0.17115 | -0.20023 | -0.05998 |         |
| MAL13P1.316     | 0.43772  | 0.35968  | 0.65165  | 0.56916  | 0.40985  | 0.25933  | 0.33947  | 0.2664   | 0.07452  | 0.04194  | 0.08158  | -0.01812 | 0.13838  | 0.18469  | 0.1402   | 0.11953  | 0.30541  | 0.26683  | 0.38877  | 0.38044  | 0.34283  | 0.47243  | 0.51234  | 0.38089  |         |
| MAL13P1.139     | 0.14865  | -0.03014 | -0.53857 | -0.60755 | -0.58883 | -0.88163 | -0.99124 | -0.72488 | -0.88376 | -0.70969 | -0.4131  | -0.24891 | -0.18101 | -0.18865 | 0.2407   | 0.55081  | 0.59822  | 0.70501  | 1.14748  | 0.93262  | 0.67097  | 0.36992  | 0.35129  | 0.0863   |         |
| PF10_0045       | -0.85297 | -0.99808 | -0.85918 | -1.06536 | -1.03151 | -0.77854 | -0.77554 | -0.79168 | -0.41089 | -0.16796 | -0.04692 | 0.14599  | 0.34689  | 0.56167  | 0.55707  | 0.67765  | 0.65012  | 0.47619  | 0.11298  | 0.15888  | 0.00216  | -0.26567 | -0.61374 | -1.01234 |         |
| PFF0335c        | -1.04465 | -0.83458 | -0.81542 | -1.11724 | -1.18642 | -1.35624 | -1.59085 | -1.50289 | -1.65684 | -1.68439 | -1.1877  | -0.66208 | 0.1047   | 0.49817  | 1.1319   | 1.12643  | 0.8181   | 0.58141  | 0.76775  | 0.11435  | -0.18002 | -0.38148 | -0.7548  | -0.89736 |         |
| PF13_0267       | -0.02956 | 0.47688  | -0.86377 | 1.25923  | 1.49905  | 1.60198  | 1.58682  | 1.38422  | 0.98829  | 0.60866  | 0.51729  | 0.36044  | 0.3314   | 0.20242  | 0.15852  | 0.12104  | -0.00753 | 0.036    | 0.04636  | 0.03997  | 0.30235  | 0.4721   | 0.56018  | 0.68583  |         |
| PF14_0057       | -0.55027 | 0.00172  | 0.2287   | 0.23377  | 0.29936  | 0.49668  | 0.49084  | 0.59267  | 0.59947  | 0.61213  | 0.92302  | 0.82882  | 0.90809  | 0.37235  | 0.61782  | 0.30705  | -0.41101 | -0.36858 | -0.00416 | -0.90358 | -1.02892 | -0.66208 | -0.70708 | -0.31991 |         |
| PF14_0650       | -0.91779 | -0.44182 | -0.22053 | -0.36048 | -0.10369 | 0.34836  | 0.30576  | -0.03048 | 0.15177  | 0.03118  | 0.05617  | 0.01829  | -0.11402 | -0.51384 | -0.43261 | -0.11847 | -0.18996 | 0.13149  | 0.32361  | -0.11917 | -0.35507 | -0.64028 | -0.597   | -0.69447 |         |
| PF13_0322       | -0.84295 | -0.50652 | -0.13621 | -0.16639 | -0.12151 | 0.00713  | 0.04589  | -0.0425  | 0.21123  | 0.30397  | 0.28681  | 0.30186  | 0.59383  | 0.47929  | 0.46136  | 0.17726  | 0.02152  | -0.24122 | -0.59992 | -0.82459 | -0.94065 | -0.74416 | -0.75354 | -0.79407 |         |
| PF14_0097       | -0.94534 | -0.9372  | -0.69021 | -0.63275 | -0.69713 | -0.47057 | -0.08375 | 0.16061  | 0.30981  | 0.40622  | 0.55568  | 0.64376  | 0.73564  | 0.61998  | 0.58199  | 0.43532  | -0.06686 | -0.01172 | -0.30552 | -0.50445 | -0.75239 | -0.63883 | -0.67254 | -0.6364  |         |
| PF10_0331       | 0.55968  | 0.58249  | 0.50255  | 0.75581  | 0.92975  | 1.05204  | 0.86768  | 0.88146  | 0.55056  | 0.26415  | 0.108    | 0.1797   | 0.0938   | 0.21028  | 0.28947  | 0.43597  | 0.13686  | 0.40602  | 0.52767  | 0.31994  | 0.23453  | 0.10857  | 0.0539   | -0.00643 |         |
| PF14_0661       | -0.10172 | 0.46147  | 0.31777  | 0.27435  | 0.40038  | 0.40385  | 0.46349  | 0.86259  | 0.73237  | 0.59953  | 0.56111  | 0.49609  | 0.07202  | -0.32522 | -0.44204 | -0.66848 | -0.69806 | -1.10811 | -0.93895 | -0.96814 | -0.65236 | -0.54308 | -0.08072 | 0.12905  |         |
| PF11_0223       | 0.24099  | 0.20196  | -0.13425 | -0.06606 | -0.25777 | -0.44209 | -0.38869 | -0.27419 | -0.16065 | 0.03195  | 0.27604  | 0.53339  | 0.38953  | 0.26396  | 0.32646  | 0.48024  | 0.40729  | 0.66216  | 0.67082  | 0.43372  | 0.0388   | -0.00942 | -0.21831 | -0.27478 |         |
| PF14_0239       | 0.41347  | 0.7991   | 0.80945  | 0.8285   | 1.04065  | 1.49528  | 1.44689  | 1.45916  | 1.32538  | 0.87192  | 0.67009  | 0.48582  | 0.05389  | -0.52756 | -0.60147 | -0.94216 | -1.3321  | -0.13862 | -0.76273 | -1.00975 | -0.64299 | -0.18798 | 0.01643  | 0.16869  |         |
| PFE0805w        | -0.33698 | -0.35963 | -0.70953 | -0.51789 | -0.31283 | -0.34988 | -0.24549 | -0.00429 | 0.36543  | 0.55041  | 0.59152  | 0.71836  | 0.77073  | 0.70943  | 0.29723  | 0.14619  | 0.11509  | 0.19344  | -0.4227  | -0.05475 | -0.18954 | -0.0927  | -0.14991 | -0.19275 |         |
| PFE0385w        | 0.29153  | 0.4043   | 0.3501   | 0.19269  | 0.03054  | -0.07446 | 0.12981  | 0.11437  | 0.09962  | -0.08157 | -0.20179 | -0.27922 | -0.43186 | -0.60868 | -0.74987 | -0.62656 | -0.7325  | -0.40256 | 0.07284  | 0.24173  | 0.31019  | 0.30114  | 0.44584  |          |         |
| PF1580c         | -0.20139 | -0.5189  | -0.61465 | -0.92459 | -1.05306 | -1.17023 | -1.23845 | -1.05868 | -0.96632 | -0.5767  | -0.43465 | -0.20822 | -0.00872 | 0.19688  | 0.34794  | 0.55934  | 0.87601  | 0.79204  | 0.71222  | 0.80864  | 0.52859  | 0.23     | -0.08046 | -0.42567 |         |
| PF13_0161       | 0.85046  | 0.08519  | -0.02609 | -0.54347 | -0.8255  | -1.01963 | -0.88281 | -1.01947 | -1.29038 | -1.37904 | -1.68201 | -1.99375 | -1.95275 | -1.96845 | -2.43403 | -2.24318 | -1.21183 | -0.41402 | 0.03871  | 0.78338  | 1.05748  | 1.31869  | 1.15598  | 1.207    |         |
| PFB0270w        | 0.54112  | 0.3948   | 0.44675  | 0.12559  | 0.43187  | 0.4886   | 0.22073  | 0.2685   | 0.34225  | 0.40142  | 0.46202  | 0.43685  | 0.2693   | -0.08123 | -0.24372 | -0.31769 | -0.49906 | -0.08904 | 0.42031  | 0.45618  | 0.377    | 0.20932  | 0.4383   | 0.67013  |         |
| PFD0515w        | 0.66968  | 0.96376  | 0.75442  | 1.22934  | 1.14452  | 1.23753  | 1.11024  | 1.21017  | 1.13799  | 0.84613  |          |          |          |          |          |          |          |          |          |          |          |          |          |          |         |

|            |          |          |          |          |          |          |          |          |          |          |          |          |          |          |           |          |          |          |          |          |          |          |          |          |
|------------|----------|----------|----------|----------|----------|----------|----------|----------|----------|----------|----------|----------|----------|----------|-----------|----------|----------|----------|----------|----------|----------|----------|----------|----------|
| PF10_0212a | -0.31201 | -0.53512 | -0.69483 | -1.04355 | -1.31076 | -1.8297  | -1.87977 | -1.93969 | -1.8181  | -1.17881 | -1.46203 | -1.22666 | -0.79866 | -0.33416 | 0.10308   | 0.48953  | 0.93122  | 0.82064  | 0.18381  | 0.73295  | 0.63925  | 0.42487  | 0.25916  | -0.21335 |
| PF0285c    | -0.44919 | -0.09403 | 0.32914  | 0.39471  | 0.67842  | 0.90403  | 0.51454  | 0.67905  | 0.74214  | 0.37801  | 0.94437  | 0.84875  | 0.84716  | 0.37333  | 0.1442    | -0.27815 | -1.05007 | -0.99035 | -1.38986 | -1.52045 | -1.5488  | -1.477   | -1.01553 | -0.87692 |
| PF0545c    | -1.37301 | -0.81791 | -0.22855 | -0.47    | -0.22422 | 0.165    | -0.01137 | 0.68444  | 0.1512   | 0.31536  | 0.5303   | 0.48108  | 0.6227   | 0.24742  | 0.32891   | 0.0477   | -0.3966  | -0.37488 | -0.78639 | -1.19666 | -1.80624 | -1.60095 | -1.571   | -1.41177 |
| PF14_0746  | -0.54194 | -0.27984 | -0.2608  | -0.18586 | 0.53552  | 1.65272  | 2.18138  | 2.11144  | 1.93511  | 1.51243  | 1.00978  | 0.17594  | -0.33599 | -0.87239 | -1.1684   | -1.52935 | -1.27329 | -1.47476 | -1.3461  | -1.39101 | -1.24226 | -0.95396 | -0.87573 | -0.54993 |
| PFA0230c   | -0.30305 | 0.35125  | 0.79725  | 1.0593   | 0.66694  | 0.85457  | 0.79449  | 0.99902  | 1.15476  | 1.04276  | 1.18472  | 0.96395  | 1.10897  | 0.38272  | 0.24278   | -0.11849 | -0.27172 | -0.53    | -0.67745 | -1.13381 | -1.27732 | -0.64307 | -0.55274 | -0.35547 |
| PF0940c    | 0.30893  | -0.3902  | -0.82364 | -1.12532 | -1.22308 | -1.98556 | -2.34691 | -2.63243 | -3.35392 | -3.60063 | -3.70001 | -4.04154 | -4.44673 | -4.67854 | -4.17202  | -3.11259 | -0.88036 | -1.01532 | 1.2946   | 0.77472  | 0.98221  | 0.46661  | 0.8557   | 1.43745  |
| PF11_0396  | 0.21942  | 0.31299  | 0.07814  | 0.37298  | 0.3426   | 0.2944   | 0.2096   | 0.02877  | -0.21306 | -0.16041 | -0.1671  | 0.02271  | -0.11683 | 0.14435  | 0.13105   | 0.22280  | 0.12959  | 0.05969  | -0.09672 | 0.0718   | 0.35522  | 0.24618  | 0.37097  | 0.21585  |
| PF11_0480  | 0.97366  | 0.7081   | 0.34093  | 0.50217  | 0.35561  | 0.10074  | 0.07347  | -0.14725 | 0.06447  | -0.1461  | -0.31228 | -0.10575 | -0.1373  | -0.0207  | 0.21528   | 0.15824  | 0.41577  | 0.29543  | 0.25738  | 0.76194  | 0.78893  | 0.67277  | 0.67503  | 0.56012  |
| PFL0130c   | -0.10041 | -0.07716 | -0.00147 | -0.29361 | -0.41545 | -0.23147 | -0.23463 | -0.37817 | -0.1257  | -0.24296 | -0.35858 | -0.28774 | -0.11505 | -0.01832 | -0.0324   | 0.12048  | 0.24608  | 0.30881  | 0.0514   | 0.248    | 0.30591  | 0.31607  | 0.20456  | -0.09927 |
| PF14_0232  | -0.75651 | -1.01481 | -0.74635 | -0.97942 | -0.75469 | -0.09962 | 0.23361  | 0.48849  | 0.70943  | 0.81072  | 0.83229  | 0.84436  | 0.82777  | 0.63769  | 0.65521   | 0.60569  | 0.24658  | 0.04682  | 0.22909  | -0.22145 | -0.59738 | -0.67425 | -0.76459 | -0.78225 |
| PF11_0484  | -0.24123 | -0.32116 | -0.30714 | -0.39432 | -0.1661  | -0.23986 | -0.34327 | -0.45699 | -0.43083 | -0.25626 | -0.1411  | -0.04929 | 0.26541  | 0.4453   | 0.56793   | 0.61079  | 0.413    | 0.47229  | 0.42823  | 0.24632  | 0.17842  | 0.02392  | 0.03798  | 0.06092  |
| PF13_0155  | -0.43066 | -0.50615 | -0.5923  | -0.89792 | -0.88205 | -0.93513 | -0.9673  | -1.18552 | -0.94556 | -0.5448  | -0.56237 | -0.35963 | 0.12377  | 0.47581  | 0.46851   | 0.53225  | 0.97494  | 0.7581   | 0.22869  | 0.64522  | 0.54872  | 0.25454  | -0.03234 | -0.47254 |
| PFB0161c   | -1.53617 | -1.57169 | -1.56974 | -1.87367 | -2.31956 | -2.24641 | -2.20768 | -2.04815 | -1.68191 | -0.95253 | -0.24904 | 0.10728  | 0.5503   | 0.39496  | 0.83829   | 1.015    | 0.49133  | 0.34258  | 0.221    | -0.46433 | -0.78657 | -0.73476 | -0.98236 | -1.09631 |
| PDF1050w   | 0.16695  | -0.08405 | 0.10215  | 0.1556   | 0.01153  | 0.28876  | -0.07728 | 0.13651  | -0.00586 | -0.58658 | -0.12768 | -0.4459  | -0.06056 | -0.30741 | -0.28656  | -0.13799 | -0.45582 | 0.0354   | 0.3286   | 0.09436  | 0.20255  | 0.73506  | 0.74226  | 0.69516  |
| PF07_0025  | 0.34011  | 0.61235  | 0.43223  | 0.28571  | 0.26548  | 0.27362  | 0.30562  | 0.50316  | 0.19053  | -0.00823 | 0.03352  | 0.06871  | -0.03207 | -0.20272 | 0.1525    | 0.14453  | -0.22716 | -0.31501 | -0.04054 | -0.24095 | -0.09665 | 0.35996  | 0.07224  | 0.24386  |
| PF10_0336  | -0.59956 | -0.70867 | -0.83917 | -0.7648  | -0.87389 | -1.07265 | -1.08407 | -0.91449 | -1.05183 | -0.76824 | -0.46127 | -0.0805  | -0.03178 | 0.15297  | 0.39868   | 0.39304  | 0.51412  | 0.12185  | 0.46057  | 0.41591  | 0.26548  | -0.03675 | -0.17233 | -0.2639  |
| MAL13P1.79 | -0.03281 | -0.1217  | 0.01916  | -0.09401 | 0.00947  | 0.03722  | 0.06077  | 0.24987  | 0.27132  | 0.22691  | 0.2633   | 0.36927  | 0.2388   | -0.07357 | -0.19682  | -0.21042 | -0.45144 | -0.26284 | -0.7048  | -0.24663 | -0.19527 | -0.16808 | -0.07913 | 0.1492   |
| PF10_0213  | -0.88452 | -1.71438 | -1.3499  | -1.89783 | -1.46602 | -1.39845 | -1.14351 | -1.0778  | -0.3249  | -0.13408 | -0.23621 | 0.04666  | 0.36073  | 0.71563  | 0.69492   | 0.51535  | 0.80185  | 0.60831  | -0.7054  | -0.19732 | -0.38931 | -0.46233 | -0.73201 | -1.28415 |
| MAL8P1.31  | 0.66693  | 0.93552  | 0.69149  | 1.11435  | 1.06899  | 1.05707  | 0.90299  | 0.88654  | 0.93373  | 0.70015  | 0.79629  | 0.68924  | 0.20972  | 0.06927  | -0.05699  | -0.19618 | -0.45937 | -0.50366 | -0.43094 | -0.38343 | -0.29128 | 0.1459   | 0.28546  | 0.4731   |
| PF13_0245  | 0.40464  | 1.30616  | 1.05422  | 1.29621  | 1.49792  | 1.51825  | 1.06114  | 1.05546  | 1.1363   | 1.06941  | 0.97476  | 0.7684   | 0.66723  | 0.53434  | 0.40558   | 0.21611  | -0.0987  | -0.22954 | -0.64119 | -0.71619 | -0.67865 | -0.22246 | -0.05059 | 0.35747  |
| PF11_0509  | 1.33331  | 1.39403  | 0.9878   | 1.43284  | 1.05555  | 0.37624  | -0.24327 | -0.70113 | -1.77098 | -2.05779 | -2.16383 | -3.31221 | -3.86231 | -3.51845 | -3.97957  | -3.84367 | -3.34345 | -1.18443 | 0.44161  | 1.13698  | 1.01349  | 1.85225  | 2.0975   |          |
| PF0845c    | -0.80381 | -0.50498 | -0.30604 | -0.64142 | -0.61614 | -0.5806  | -0.46391 | -0.22052 | 0.09286  | 0.16706  | 0.28044  | 0.49798  | 0.55557  | 0.37258  | 0.53479   | 0.45494  | 0.20523  | 0.0476   | 0.25056  | -0.13004 | -0.21492 | -0.29025 | -0.35877 | -0.39569 |
| PFB0015c   | 0.69966  | 0.92385  | 0.80281  | 1.10009  | 1.24522  | 1.24963  | 1.40904  | 1.35457  | 0.91636  | 0.56839  | 0.49489  | 0.20301  | 0.10265  | 0.30406  | 0.22773   | 0.13623  | -0.11009 | 0.00967  | 0.02719  | -0.06986 | -0.11422 | -0.05849 | 0.04945  | 0.32059  |
| MAL8P1.205 | -0.2604  | 0.1402   | 0.33387  | 0.15625  | 0.12184  | 0.20938  | 0.13714  | -0.00484 | 0.02479  | -0.07038 | 0.07364  | 0.12043  | 0.19963  | 0.22815  | -0.15581  | -0.17958 | -0.0373  | -0.0287  | -0.66566 | -0.01765 | 0.3252   | 0.6396   | 0.46135  | 0.53111  |
| PFL1240c   | 0.05544  | -0.01874 | -0.06441 | 0.04512  | 0.16549  | 0.04302  | -0.17557 | 0.0106   | -0.29448 | -0.44362 | -0.25895 | -0.36954 | -0.37228 | -0.38443 | 0.27395   | 0.22534  | 0.24333  | 0.37802  | 0.11827  | -0.03072 | -0.03033 | 0.07593  | 0.20305  |          |
| PF10_0345  | 0.47206  | -0.12266 | -0.93991 | -1.17841 | -0.21852 | -0.86354 | -2.45072 | -1.8898  | -3.91682 | -3.4793  | -3.44259 | -3.95179 | -3.66077 | -1.54532 | -1.99796  | -0.66945 | -0.11001 | -0.19097 | 1.44826  | 1.25551  | 1.78608  | 1.24273  | 1.36352  | 1.3998   |
| PF13_0089  | -0.35218 | 0.10314  | 0.2088   | 0.08059  | -0.04762 | 0.04135  | 0.10312  | -0.15851 | -0.1709  | -0.10604 | -0.12379 | 0.05735  | 0.10677  | 0.44176  | 0.45257   | 0.46624  | 0.40838  | 0.30806  | -0.19007 | -0.06071 | -0.017   | 0.01995  | -0.22247 | -0.30459 |
| PF10_0359  | -0.58018 | -0.23455 | -0.5274  | -0.09393 | 0.05207  | 0.1263   | 0.37656  | 0.69705  | 0.95656  | 1.19265  | 1.47232  | 1.2323   | 1.00502  | 0.25245  | -0.18724  | -0.16997 | -0.20643 | -0.20978 | -0.25533 | -0.57282 | -0.53318 | -0.32099 | -0.3906  | -0.27909 |
| PF14_0728  | 1.59709  | 2.12265  | 2.10408  | 2.32896  | 2.59578  | 2.8338   | 2.70904  | 2.55274  | 2.0074   | 1.13586  | 0.82603  | 0.4071   | -0.00978 | -0.2944  | 0.73251   | -0.77395 | -1.63944 | -1.12587 | -0.76773 | -0.70868 | -0.38903 | -0.32561 | 0.29873  | 0.6754   |
| PFL1240c   | 0.06315  | 0.57769  | 0.60678  | 0.7522   | 0.99346  | 0.72606  | 0.84347  | 0.46578  | 0.35933  | 0.55874  | 0.59049  | 0.69386  | 0.6852   | 0.69239  | 0.33496   | -0.04644 | -0.25149 | -0.55818 | -0.90404 | -0.99944 | -0.78099 | -0.40288 | -0.33942 | -0.20742 |
| PFF0870w   | 0.17879  | -0.68848 | -1.10278 | -1.24438 | -1.65746 | -2.04405 | -2.39281 | -2.85065 | -3.56123 | -4.06008 | -4.13872 | -4.4923  | -4.29435 | -3.82223 | -2.42453  | -0.6115  | 0.67502  | 0.51187  | 1.50897  | 1.28121  | 1.26639  | 0.9283   | 0.90125  | 0.38757  |
| PF11_0241  | 0.28644  | 0.37961  | 0.51077  | 0.36465  | 0.26751  | -0.04639 | 0.03328  | -0.01248 | -0.16748 | -0.09517 | -0.3488  | -0.36074 | -0.28397 | -0.19353 | -0.36868  | -0.3325  | -0.01102 | 0.15651  | -0.46303 | 0.27316  | 0.30774  | 0.23919  | 0.31742  | 0.22797  |
| MAL7P1.75  | -1.29808 | -1.04847 | -0.9554  | -1.0065  | -0.98846 | -1.11647 | -1.26224 | -1.18001 | -0.98444 | -0.3583  | 0.41219  | 0.76785  | 0.16158  | 0.74201  | 0.63924   | 0.38591  | 0.24967  | -0.08078 | -0.30977 | -0.5413  | -0.6498  | -0.68174 | -0.64432 | -0.56073 |
| PF11_0298  | -0.01377 | 0.05901  | -0.37791 | -0.19816 | -0.19135 | -0.27853 | -0.25502 | -0.53082 | -0.5146  | -0.42494 | -0.52521 | -0.46105 | -0.28061 | -0.02096 | 0.42902   | 0.69148  | 0.76589  | 0.75746  | 1.12744  | 0.73354  | 0.48075  | 0.24799  | 0.15984  | -0.03017 |
| PF14_0111  | 0.21191  | 0.06903  | 0.25208  | 0.01184  | 0.12971  | 0.13331  | 0.02076  | -0.01685 | -0.10496 | -0.09873 | -0.04055 | -0.01848 | 0.02134  | -0.18493 | 0.02802   | 0.04071  | 0.0793   | 0.11806  | 0.65725  | 0.45385  | 0.62592  | 0.2143   | 0.20783  | 0.38231  |
| MAL7P1.171 | -0.65608 | -0.19873 | 0.36671  | 0.37141  | 0.53932  | 1.46811  | 2.09801  | 2.06007  | 2.40243  | 2.09902  | 1.45605  | 0.84233  | 0.05371  | -0.9817  | -0.180394 | -2.34096 | -2.06502 | -2.4341  | -2.57365 | -2.28896 | -1.59713 | -0.93668 | -0.61309 | -0.05245 |
| MAL8P1.71  | 0.24974  | 0.31994  | 0.2645   | 0.21758  | 0.06728  | 0.09082  | -0.01121 | -0.05118 | -0.16804 | -0.20935 | -0.15574 | 0.00094  | -0.28248 | -0.47754 | -0.51777  | -0.26764 | -0.26427 | 0.03917  | 0.26902  | 0.24737  | 0.34656  | 0.39995  | 0.56526  | 0.10698  |
| PF10_0253  | -0.65813 | -0.6546  | -0.59599 | -0.63269 | -0.69491 | -0.7166  | -0.84006 | -0.51161 | -0.31151 | 0.16542  | 0.68602  | 0.82078  | 1.02952  | 0.68766  | 0.68533   | 0.38981  | 0.15968  | 0.06836  | 0.24163  | -0.04055 | -0.29797 | -0.23954 | -0.25764 | -0.15547 |
| PFL1415w   | -0.11758 | -0.52882 | -0.87866 | -1.27229 | -1.37898 | -1.67866 | -1.98287 | -2.25577 | -2.45507 | -2.61758 | -2.55894 | -2.36072 | -1.67705 | -0.85894 | -0.06706  | 0.63204  | 0.99697  | 1.24206  | 1.02834  | 1.04659  | 0.9256   | 0.6196   | 0.20746  | -0.36517 |
| PFE0355c   | 0.243    | -0.22164 | -0.59711 | -0.82898 | -0.88569 | -1.36736 | -1.63529 | -1.80377 | -2.19772 | -2.5581  | -2.75569 | -1.68941 | -2.17737 | -1.29407 | -0.26723  | 0.55104  | 0.95747  | 0.88912  | 1.18875  | 1.2237   | 1.17856  | 0.62237  | 0.38079  | 0.00531  |
| PFL0580w   | -1.04476 | -1.40397 | -1.87768 | -1.50065 | -1.56142 | -1.74948 | -1.34772 | -1.73363 | -1.2506  | -0.82088 | -0.30869 | -0.03029 | 0.3719   | 0.43889  | 0.84626   | 0.82667  | 0.78452  | 0.36184  | 0.76373  | 0.28321  | 0.061    | -0.26931 | -0.60757 | -1.0     |

|             |          |          |          |          |          |          |          |          |          |          |          |          |          |          |          |          |          |          |          |          |          |          |          |          |
|-------------|----------|----------|----------|----------|----------|----------|----------|----------|----------|----------|----------|----------|----------|----------|----------|----------|----------|----------|----------|----------|----------|----------|----------|----------|
| PF14 0610   | 1.68181  | 1.81267  | 1.08857  | 1.52214  | 1.36751  | 0.41341  | 1.02511  | 1.03984  | 0.96385  | 0.8131   | 0.78955  | 0.5526   | 0.16633  | -0.03776 | -0.44664 | -0.46321 | -0.77617 | -0.57103 | -0.64313 | -0.68379 | -0.1239  | 0.46875  | 0.77298  | 1.09858  |
| PFB0420w    | -0.77211 | -0.69072 | -0.37789 | -0.56696 | -0.59704 | -0.25234 | -0.24197 | 0.1171   | 0.35176  | 0.42168  | 0.75958  | 0.97758  | 0.90804  | 0.7478   | 0.91579  | 0.72993  | 0.41378  | -0.01104 | -0.03684 | -0.63141 | -0.77504 | -0.99175 | -0.94332 | -0.75985 |
| PF10 0074   | 0.00681  | 0.64647  | 0.35683  | 0.55337  | 0.35619  | 0.2777   | 0.3087   | 0.27198  | 0.29325  | 0.20808  | 0.26774  | 0.33383  | 0.49523  | 0.30909  | 0.49232  | 0.2968   | 0.20182  | -0.06033 | 0.02172  | -0.2281  | -0.22415 | -0.28036 | -0.10707 | -0.19027 |
| PFI0470w    | 0.8821   | 0.628    | 0.60055  | 0.79944  | 0.88318  | 0.68175  | 0.54535  | 0.39596  | 0.08338  | -0.21023 | -0.35804 | -0.49216 | -0.5979  | -0.62705 | -0.60752 | -0.58027 | -0.41224 | -0.41817 | 0.29037  | 0.4262   | 0.69902  | 0.97776  | 1.07919  | 0.98787  |
| PF07 0016   | -0.85051 | -1.13845 | -0.94312 | -1.66263 | -1.83774 | -2.07689 | -2.09291 | -2.38859 | -2.47749 | -1.98262 | -1.57542 | -1.00241 | -0.16143 | 0.36478  | 0.54976  | 0.73969  | 1.24347  | 0.81903  | -0.04343 | 0.39158  | 0.22221  | 0.09472  | -0.38981 | -0.903   |
| MAL13P1.130 | -0.01242 | -0.90294 | -0.7192  | -1.48981 | -2.2006  | -2.18878 | -2.67216 | -2.80668 | -3.43099 | -3.88344 | -3.53559 | -3.91273 | -3.24338 | -2.50808 | -0.99349 | 0.32181  | 0.94733  | 0.79652  | 1.27642  | 1.24793  | 0.90843  | 0.67628  | 0.74639  | -0.25575 |
| PFI0970c    | -0.06492 | -0.08982 | -0.15113 | -0.28805 | -0.64467 | -0.6059  | -0.96303 | -1.12498 | -1.43446 | -1.4338  | -1.16982 | -0.88075 | -0.46589 | -0.06601 | 0.30055  | 0.54296  | 0.58948  | 0.61653  | 0.34524  | 0.32873  | 0.3011   | 0.18802  | 0.02945  | -0.12095 |
| PFF1475c    | 0.29621  | -0.20479 | -0.42641 | -0.32933 | -0.24886 | -0.44054 | -0.774   | -0.93317 | -1.30269 | -1.37561 | -1.31537 | -1.41149 | -1.27343 | -0.98703 | -0.42966 | 0.38776  | 0.66107  | 0.55317  | 1.25157  | 1.27625  | 1.04678  | 0.54805  | 0.63256  | 0.62733  |
| PF11 0343   | 0.14262  | -0.16512 | -0.35285 | -0.62912 | -1.05084 | -1.31301 | -1.60414 | -1.7322  | -2.06988 | -2.38307 | -2.27836 | -2.19816 | -1.71191 | -1.21233 | -0.02757 | 0.77515  | 1.19742  | 1.04454  | 1.48073  | 1.27249  | 1.16653  | 0.68439  | 0.53792  | -0.23736 |
| PF14 0721   | -0.14934 | -0.38661 | -0.56507 | -0.9186  | -0.84417 | -0.89459 | -0.78378 | -0.28808 | -0.15436 | 0.23592  | 0.26267  | 0.42748  | 0.33682  | 0.34639  | 0.40848  | 0.49257  | 0.45957  | 0.55609  | 0.12304  | 0.32292  | 0.07513  | -0.19596 | -0.14481 | -0.30329 |
| PFF0180w    | -0.79987 | -0.99965 | -0.94094 | -0.95561 | -0.50665 | -0.46437 | -0.49629 | -0.15225 | 0.35139  | 0.71324  | 0.8187   | 0.8177   | 0.76203  | 0.7811   | 0.48356  | 0.46648  | 0.11212  | 0.34267  | 0.01175  | -0.03461 | -0.37949 | -0.34071 | -0.46718 | -0.59663 |
| PFF0455w    | 0.62488  | 0.76288  | 0.97697  | 0.87938  | 0.86654  | 1.07896  | 0.89562  | 0.87905  | 0.90312  | 0.7995   | 0.61031  | 0.44898  | 0.24275  | -0.15871 | -0.34303 | -0.21978 | -0.36487 | 0.04211  | 0.33571  | 0.19961  | 0.15469  | 0.24363  | 0.39143  | 0.53147  |
| MAL7P1.81   | -0.57841 | -0.21234 | 0.13638  | 0.18557  | 0.01139  | 0.14476  | 0.21939  | 0.4651   | 0.45188  | 0.78631  | 0.695    | 0.72741  | 0.70976  | 0.4374   | 0.29256  | -0.06891 | -0.61225 | -1.00951 | -1.06103 | -1.67442 | -1.58222 | -0.80895 | -0.87122 | -0.67813 |
| PFI1055c    | 0.64605  | 0.98798  | 1.08018  | 1.47253  | 1.57071  | 1.66363  | 1.78776  | 1.54624  | 0.96456  | 0.51975  | -0.28106 | -1.19026 | -1.76383 | -2.2111  | -2.23996 | -2.43612 | -1.94576 | -2.23012 | -1.49238 | -0.79468 | -0.32004 | 0.2264   | 0.5733   | 0.83617  |
| PFI1620c    | -0.48665 | -0.49416 | -0.39538 | -0.34701 | -0.4324  | -0.09928 | -0.13226 | -0.31201 | -0.11873 | -0.07234 | 0.04352  | 0.19889  | 0.31578  | 0.71088  | 0.73478  | 0.68715  | 0.62233  | 0.55782  | 0.20404  | 0.26937  | 0.05914  | -0.03219 | -0.16119 | -0.40688 |
| PFF1265w    | -0.11899 | -0.15503 | -0.51495 | 0.19794  | 0.32779  | 0.33853  | 0.48739  | 0.68018  | 0.55456  | 0.3954   | 0.59206  | 0.55052  | 0.6136   | 0.53473  | 0.53553  | 0.53671  | 0.22673  | 0.36384  | 0.44813  | 0.07285  | -0.0354  | -0.20907 | -0.11416 | -0.09736 |
| PFL2130w    | -0.54717 | 0.12909  | -0.45322 | 1.23548  | 1.27626  | 0.81058  | 0.29043  | 0.49399  | -0.16568 | -0.13818 | 0.16208  | 0.01311  | -0.12108 | -0.22382 | -0.26757 | -0.58907 | -0.90114 | -1.05123 | -1.11319 | -0.86117 | -0.52275 | -0.39875 | 0.83767  | 1.52822  |
| PFF0380w    | -0.61895 | -0.79698 | -0.93904 | -1.31195 | -1.29806 | -1.42535 | -1.55589 | -1.76446 | -2.21329 | -2.35633 | -2.42065 | -2.56887 | -1.90605 | -0.72432 | 0.46987  | 1.02257  | 1.2888   | 1.04967  | 0.49821  | 0.91275  | 0.71242  | 0.38261  | -0.04975 | -0.50103 |
| PFI1400c    | 0.58813  | 1.01494  | 0.99953  | 1.32663  | 1.32428  | 1.25436  | 1.22125  | 1.00506  | 1.24783  | 1.09488  | 0.76212  | 0.55195  | 0.25908  | -0.10901 | -0.1719  | -0.4032  | -0.49702 | -0.51692 | -0.56435 | -0.43768 | -0.26428 | 0.0616   | 0.22309  | 0.54646  |
| PF11 0466   | -1.0224  | -0.83753 | -0.77293 | -0.7745  | -0.82974 | -0.74865 | -0.37851 | 0.14531  | 0.41883  | 0.58565  | 0.79397  | 0.95167  | 0.91995  | 0.77202  | 0.70963  | 0.40743  | 0.20627  | -0.02554 | -0.09344 | -0.57088 | -0.77123 | -0.73648 | -0.91329 | -0.94867 |
| PFL0880c    | 0.49351  | 0.57171  | 0.28723  | 0.52883  | 0.44601  | 0.28597  | 0.22307  | 0.29472  | 0.18997  | 0.2302   | 0.23289  | 0.07145  | 0.04531  | 0.03479  | -0.10045 | -0.17559 | -0.02465 | -0.16608 | -0.30771 | 0.07415  | 0.09033  | 0.22666  | 0.3259   | 0.34604  |
| PFL0335c    | -0.23291 | -0.23131 | 0.10882  | 0.06075  | -0.04664 | 0.16591  | 0.24484  | 0.32336  | 0.17075  | 0.37111  | 0.44546  | 0.48069  | 0.24463  | 0.28899  | 0.26616  | -0.0651  | -0.61074 | -0.42965 | -0.73516 | -0.75967 | -0.70241 | -0.53242 | -0.486   | -0.30478 |
| MAL8P1.35   | -0.29056 | -0.4143  | -0.20232 | -0.47872 | -0.57641 | -0.54685 | -0.46862 | 0.14712  | 0.75729  | 0.90854  | 1.16126  | 1.07033  | 0.93903  | 0.68291  | 0.46262  | 0.2729   | -0.22833 | -0.11008 | -0.15164 | -0.27985 | -0.21076 | -0.21221 | -0.24463 | -0.20517 |
| PFE0285c    | -1.60191 | -1.04862 | -0.67376 | -0.86564 | -0.95615 | -0.4482  | -0.36676 | -0.18318 | -0.20037 | -0.0255  | 0.42911  | 0.5214   | 0.49348  | 0.43465  | 0.6366   | 0.61517  | 0.14623  | 0.12036  | -0.3209  | -1.02166 | -1.38852 | -1.33276 | -1.43837 | -1.53024 |
| PFE1335c    | -0.52275 | 0.00986  | 0.54287  | 0.57847  | 0.69428  | 0.84786  | 0.87137  | 0.71223  | 0.57097  | 0.47831  | 0.50796  | 0.64574  | 0.60002  | 0.23345  | 0.17376  | -0.14257 | -0.41096 | -0.74964 | -0.81225 | -1.15561 | -1.24334 | -0.9582  | -0.85136 | -0.477   |
| PF13 0277   | -0.6579  | -0.69644 | -0.54943 | -0.61647 | -0.32641 | -0.05181 | 0.07923  | -0.03597 | 0.09212  | 0.13229  | -0.05062 | 0.16265  | 0.23908  | 0.56746  | 0.2444   | 0.21528  | 0.47797  | 0.30956  | -0.29217 | 0.0065   | -0.09014 | -0.22034 | -0.41763 | -0.6459  |
| PF10 0101   | 0.5709   | 0.97019  | 0.61469  | 0.06904  | -0.04916 | -0.17939 | -0.3358  | -0.43077 | -0.45641 | -0.37027 | -0.53737 | -0.32848 | -0.32811 | -0.24758 | -0.20385 | 0.17011  | 0.4742   | 0.6162   | 0.82038  | 0.62711  | 0.56728  | 0.36198  | 0.2018   | 0.13139  |
| PF10 0180   | 0.14365  | 0.25775  | 0.24995  | 0.34385  | 0.38218  | 0.14537  | 0.21619  | 0.50588  | 0.48063  | 0.56094  | 0.58565  | 0.57121  | 0.07938  | -0.13994 | -0.35829 | -0.53241 | -0.51016 | -0.94303 | -0.60687 | -0.43931 | -0.27434 | -0.5573  | -0.28079 | 0.00839  |
| PF13 0276   | 0.05931  | 1.14325  | 1.89181  | 2.21574  | 2.83849  | 2.46929  | 2.05141  | 1.07239  | 0.35065  | -0.37697 | -1.31201 | -2.43525 | -3.27927 | -3.78623 | -3.93036 | -4.19711 | -3.8743  | -4.42324 | -3.66808 | -3.56452 | -2.36969 | -1.10832 | -0.51372 | -0.27337 |
| PFE0885w    | 0.07698  | 0.40809  | 0.40305  | 0.56053  | 0.56856  | 0.48341  | 0.42775  | 0.71005  | 0.54156  | 0.5763   | 0.80095  | 0.60565  | 0.5084   | 0.31256  | 0.18126  | -0.31393 | -0.80785 | -0.72387 | -0.93135 | -1.13718 | -0.82649 | -0.58871 | -0.40773 | -0.26023 |
| PFL1790w    | -0.83044 | -0.54173 | -0.32584 | -0.12406 | -0.20889 | 0.14404  | 0.10883  | 0.24255  | 0.74618  | 0.79448  | 0.85624  | 1.14459  | 0.86868  | 0.67061  | 0.54008  | 0.48363  | 0.05044  | 0.08037  | 0.18716  | -0.57108 | -0.84935 | -0.75049 | -0.98522 | -1.15407 |
| MAL13P1.111 | -0.19892 | -0.18134 | -0.25633 | -0.4296  | -0.45755 | -0.45187 | -0.51885 | -0.72868 | -0.85485 | -0.65198 | -0.49258 | -0.47771 | 0.09152  | 0.16904  | 0.67871  | 0.64928  | 0.49345  | 0.58837  | 0.80364  | 0.46239  | 0.10834  | -0.1533  | -0.1034  | -0.11358 |
| PFE1040c    | 0.29485  | 0.54977  | 0.63686  | 0.95349  | 0.76177  | 0.97859  | 0.79014  | 0.82451  | 0.96002  | 0.93276  | 0.99024  | 0.85527  | 0.57793  | 0.55747  | 0.30355  | 1.12103  | -0.13083 | -0.1631  | -0.36695 | -0.58523 | -0.60975 | -0.40585 | -0.35104 | -0.04638 |
| PFE1450c    | -0.87599 | -1.04231 | -1.11467 | -1.19388 | -0.94838 | -0.84486 | -0.73673 | -0.48584 | -0.32106 | -0.04971 | 0.46922  | 0.71704  | 0.94387  | 0.75501  | 0.797    | 0.72095  | 0.27244  | 0.47173  | 0.03887  | -0.25911 | -0.44732 | -0.61842 | -0.67954 | -0.60911 |
| MAL13P1.348 | 0.35947  | 0.40526  | 0.4247   | 0.32861  | 0.25559  | 0.01637  | -0.11301 | -0.19921 | -0.4589  | -0.20954 | -0.0839  | 0.00497  | 0.21542  | 0.30247  | 0.40553  | 0.45253  | 0.60841  | 0.16726  | 0.17667  | -0.01285 | -0.04901 | -0.00748 | -0.13954 | 0.07314  |
| PF07 0114   | -0.3298  | -0.12422 | -0.11757 | -0.24425 | -0.02332 | 0.09378  | 0.18273  | 0.15746  | 0.0977   | 0.00708  | 0.03712  | -0.02692 | 0.07053  | 0.12317  | 0.20359  | 0.26772  | 0.52615  | 0.38583  | 0.39084  | 0.25751  | 0.04346  | 0.1441   | -0.09214 | -0.14265 |
| PF11 0007   | -0.21593 | 0.82031  | 1.07875  | 1.91508  | 2.95924  | 2.75799  | 2.53047  | 2.41505  | 1.90789  | 1.32788  | 0.63721  | 0.01594  | -0.21999 | -0.1667  | -1.23816 | -0.69706 | -1.64231 | -1.47941 | -1.83259 | -1.22148 | -0.78552 | -1.1686  | -0.82252 | -0.79177 |
| PF0610c     | 0.50093  | 0.69979  | 0.50546  | 1.014    | 1.13857  | 1.02406  | 0.72155  | 0.73429  | 0.45403  | 0.31457  | 0.29732  | 0.08781  | 0.19483  | 0.20743  | -0.0943  | -0.11201 | -0.04847 | 0.04033  | -0.04789 | 0.38016  | 0.68979  | 0.82277  | 1.0816   | 1.2397   |
| PFD1145c    | 0.89527  | 0.33763  | -0.38933 | -0.87084 | -1.13701 | -1.81832 | -2.20514 | -2.46799 | -3.06311 | -3.44227 | -3.72831 | -4.12053 | -4.24061 | -4.23173 | -4.08216 | -3.27275 | -1.41076 | -0.55064 | 1.24822  | 1.29949  | 1.28158  | 1.25809  | 1.39193  | 1.25372  |
| PF11 0144   | 0.84244  | 1.03134  | 1.01584  | 1.14133  | 1.10029  | 0.84697  | 0.79815  | 0.8579   | 0.63342  | 0.41071  | 0.30405  | 0.17072  | 0.19283  | 0.13308  | 0.16565  | 0.03247  | -0.27176 | -0.03942 | 0.21788  | 0.26195  | 0.32971  | 0.31523  | 0.49147  | 0.79446  |
| PFE0005w    | -0.2152  | 0.81142  | 0.87383  | 1.2158   | 1.3136   | 1.61083  | 1.45003  | 1.46199  | 1.37831  | 1.07019  | 0.60719  | 0.24546  | -0.14379 | -0.48728 | -0.67515 | -2.07877 | -2.43625 | -1.21438 | -2.13078 | -2.      |          |          |          |          |

|             |          |          |          |          |          |          |          |          |          |          |          |          |          |          |          |          |          |          |          |          |          |          |          |          |
|-------------|----------|----------|----------|----------|----------|----------|----------|----------|----------|----------|----------|----------|----------|----------|----------|----------|----------|----------|----------|----------|----------|----------|----------|----------|
| PF13 0191   | -0.92027 | -0.77422 | -0.76517 | -0.79544 | -0.47227 | -0.26238 | 0.14861  | 0.69608  | 0.95946  | 1.04277  | 1.04744  | 0.98051  | 0.84248  | 0.58937  | 0.29256  | -0.06139 | 0.05122  | -0.22082 | -0.53056 | -0.42876 | -0.52129 | -0.63066 | -0.79297 | -0.69541 |
| PF10 0278   | 0.46337  | 0.64623  | 0.50504  | 0.81164  | 0.72769  | 0.76577  | 0.8177   | 1.03253  | 0.98671  | 1.07244  | 0.98831  | 0.80574  | 0.43745  | 0.04559  | -0.30347 | -0.55696 | -0.95208 | -1.04599 | -1.02084 | -0.90004 | -0.61763 | -0.15479 | 0.01836  | 0.43001  |
| MAL7P1.33   | -0.81025 | -0.86648 | -0.68269 | -0.57445 | -0.27312 | 0.3902   | 0.58039  | 0.62542  | 0.95141  | 0.9146   | 1.15257  | 1.1246   | 0.95933  | 0.53219  | 0.38815  | 0.2426   | -0.2429  | -0.3652  | -0.32833 | -0.74593 | -0.81057 | -0.77308 | -0.75724 | -0.54738 |
| PF11 0540   | 0.36137  | 0.58592  | 0.65983  | 0.7899   | 0.65141  | 0.49822  | 0.53851  | 0.47369  | 0.53177  | 0.57063  | 0.59287  | 0.73435  | 0.51064  | 0.4653   | 0.32828  | 0.07942  | 0.17096  | -0.1488  | 0.05591  | 0.00259  | 0.18188  | 0.13747  | 0.22491  | 0.43361  |
| MAL8P1.125  | -0.5035  | -0.23485 | 0.22383  | 0.00323  | 0.20207  | 0.23387  | 0.24722  | 0.49746  | 0.40518  | 0.2227   | 0.55381  | 0.56724  | 0.62191  | 0.29949  | 0.4624   | 0.30466  | -0.09637 | -0.24888 | -0.1433  | -0.64774 | -0.8555  | -0.49363 | -0.55496 | -0.64733 |
| PFL0470w    | 1.04155  | 0.82696  | -0.20416 | 0.14656  | -0.495   | -0.61535 | -0.67496 | -0.73182 | -0.76565 | -1.15372 | -0.76132 | -0.657   | -0.9241  | -1.07502 | -1.00976 | -1.83985 | -1.51203 | -0.31817 | 1.02178  | 0.55198  | 0.9829   | 1.17857  | 0.9991   | 0.94806  |
| PF11 0307   | 0.77535  | 0.60949  | 0.56936  | 0.46013  | 0.49883  | 0.563    | 0.50217  | 0.41335  | 0.08251  | -0.07364 | -0.22183 | -0.3805  | -0.40731 | -0.35754 | -0.25347 | -0.2067  | 0.34365  | 0.45778  | 0.9148   | 1.1118   | 1.36145  | 1.12686  | 0.36363  | 1.0544   |
| PF11 0422   | 0.05008  | 0.31764  | 1.30717  | 0.94718  | 0.76775  | 1.13073  | 1.13583  | 0.71545  | 0.59179  | 0.66619  | 0.37812  | 0.31577  | 0.20591  | 0.19031  | -0.07905 | -0.15669 | -1.12667 | -0.04223 | -0.43045 | 0.11485  | 0.15339  | 0.21197  | 0.55391  | 0.58112  |
| PF14 0122   | -0.56981 | -0.20635 | -0.44331 | -0.50878 | -0.59006 | -0.67699 | -0.63201 | -0.36277 | -0.45265 | -0.0932  | 0.33317  | 0.3913   | 0.41568  | 0.48032  | 0.61458  | 0.4972   | 0.17955  | 0.1864   | -0.46632 | -0.9554  | -1.00618 | -1.00477 | -1.14193 | -0.93101 |
| PFE1305c    | -0.37674 | -0.57803 | -0.66981 | -0.74415 | -0.68968 | -0.67602 | -0.65949 | -0.34994 | -0.42569 | -0.2563  | -0.16672 | 0.08088  | -0.00271 | 0.03748  | 0.29529  | 0.49278  | 0.36217  | 0.36     | 0.93535  | 0.53365  | 0.4371   | 0.05793  | 0.08607  | -0.05819 |
| PF10 0379   | -0.80301 | -0.90949 | -1.24586 | -1.07417 | -1.00801 | -0.7206  | -0.28769 | 0.19879  | 0.45759  | 0.62383  | 0.77116  | 0.73348  | 0.87048  | 0.63853  | 0.77091  | 0.58934  | 0.206    | 0.16729  | 0.43067  | -0.15123 | -0.48187 | -0.4328  | -0.47955 | -0.44448 |
| PF10 0218   | 1.0753   | 0.22536  | -0.32464 | -0.10719 | -0.00598 | -0.49311 | -0.72244 | -0.83071 | -1.44981 | -1.55686 | -1.44604 | -1.27639 | -0.93385 | -0.66897 | -0.13102 | 0.03961  | -0.02656 | 0.15039  | 1.14255  | 0.92491  | 0.93802  | 0.63552  | 0.81936  | 1.2561   |
| PFE0940c    | -0.03099 | 0.12249  | 0.27608  | 0.54482  | 0.65621  | 0.59578  | 0.57295  | 0.54752  | 0.2787   | 0.2277   | 0.2622   | 0.17489  | 0.22067  | 0.08327  | -0.2057  | -0.02127 | -0.21047 | -0.19626 | 0.07125  | -0.00998 | 0.10738  | 0.20874  | 0.39559  | 0.52948  |
| PF07 0088   | -0.02026 | -0.29791 | 0.16902  | 0.22553  | 0.15678  | 0.58143  | 0.35131  | 0.51774  | 0.83016  | 0.66789  | 0.85443  | 0.63949  | 0.77092  | 0.46672  | 0.4381   | 0.14888  | -0.616   | -0.75255 | -1.11794 | -1.67829 | -1.84117 | -1.29226 | -1.09667 | -1.11529 |
| PF10 0034   | 0.48744  | 0.0415   | -0.81154 | -0.33666 | -0.50172 | -0.84926 | -1.14263 | -1.4537  | -1.90933 | -2.18212 | -2.35243 | -2.34577 | -2.36161 | -1.74862 | -0.83056 | 0.10685  | 0.77293  | 0.98656  | 1.16775  | 1.31982  | 1.24088  | 1.18125  | 1.03196  | 0.547    |
| PFC0145c    | 0.32123  | -0.02748 | -0.27476 | -0.22578 | -0.23792 | -0.1722  | -0.17421 | -0.1874  | -0.21267 | -0.40218 | -0.53988 | -0.70731 | -0.63273 | -0.62079 | -0.34342 | -0.0598  | 0.28888  | 0.46442  | 0.9573   | 0.80439  | 0.7524   | 0.65377  | 0.64754  | 0.47736  |
| PF08 0040   | 0.78031  | 1.09175  | 1.05697  | 1.4015   | 1.12154  | 1.12477  | 1.02479  | 0.90043  | 0.80189  | 0.63965  | 0.68732  | 0.63085  | 0.51475  | 0.33258  | 0.24322  | 0.05496  | -0.3891  | -0.37081 | -0.05731 | -0.58253 | -0.33744 | -0.34165 | 0.14993  | 0.47289  |
| PFE1545c    | 0.09576  | -0.22217 | -0.27139 | -0.56682 | -0.6641  | -0.68299 | -0.81522 | -1.11352 | -1.23582 | -1.2659  | -1.27983 | -1.3094  | -1.1313  | -0.5536  | -0.0398  | 0.46782  | 1.25214  | 0.9103   | 0.71753  | 0.97519  | 1.12577  | 0.72642  | 0.47568  | -0.05144 |
| PF13 0093   | 0.07198  | 0.24169  | 0.29244  | 0.31731  | 0.50594  | 0.4312   | 0.4543   | 0.69479  | 0.6264   | 0.50082  | 0.70404  | 0.61526  | 0.49417  | 0.2979   | 0.25762  | 0.1577   | -0.72937 | 0.01894  | 0.12629  | 0.01177  | 0.11245  | -0.0638  | -0.09291 | -0.04471 |
| MAL13P1.229 | -0.80159 | -0.77647 | -0.79894 | -0.87774 | -0.7225  | -0.70437 | -0.70951 | -0.54455 | -0.65031 | -0.49737 | 0.1586   | -0.08882 | 0.45502  | 0.23733  | 0.60933  | 0.58171  | 0.40349  | 0.41325  | 0.37157  | -0.00112 | -0.21797 | -0.39803 | -0.50264 | -0.38879 |
| PFE1000c    | -0.31431 | -0.3325  | -0.04461 | -0.46398 | -0.2476  | 0.08449  | 0.06136  | 0.52733  | 0.43843  | 0.6465   | 0.59377  | 0.74192  | 0.386    | 0.40655  | 0.49111  | 0.48173  | 0.13112  | 0.34346  | 0.07773  | -0.02098 | -0.40598 | -0.4096  | -0.76019 | -0.78485 |
| PF13 0200   | -0.95219 | -1.04458 | -0.99025 | -1.2684  | -1.36073 | -1.31536 | -0.87502 | -0.68012 | -0.26203 | 0.04253  | 0.18258  | 0.47486  | 0.64004  | 0.61603  | 0.64615  | 0.60807  | 0.24947  | 0.43912  | 0.10239  | -0.07229 | -0.24964 | -0.50504 | -0.7464  | -0.9236  |
| PFE0440w    | -0.2208  | -0.53664 | -0.69615 | -1.14662 | -1.24054 | -1.52137 | -1.81863 | -2.006   | -2.35835 | -2.63386 | -2.78378 | -2.7221  | -2.07004 | -0.98271 | -0.02857 | 0.62907  | 1.02789  | 1.06852  | 0.2607   | 1.03579  | 0.88874  | 0.49141  | 0.12694  | -0.38204 |
| PFI0820c    | 1.25153  | 1.22383  | 1.06982  | 1.36513  | 1.30078  | 1.23657  | 0.81824  | 0.63779  | 0.0527   | -0.6839  | -0.65039 | -0.93212 | -1.31687 | -1.33923 | -1.25842 | -1.14553 | -1.43412 | -1.24004 | 0.00666  | -0.0241  | 0.20911  | 0.29114  | 0.74283  | 0.88885  |
| PF10 0084   | -1.22302 | -1.35564 | -0.92838 | -1.48261 | -1.7631  | -1.56811 | -1.54993 | -1.94299 | -1.03441 | -0.74691 | -0.37554 | 0.00977  | 0.1338   | 0.62556  | 0.72389  | 0.77536  | 0.47142  | 0.58704  | 0.28266  | 0.03619  | -0.41611 | -0.02123 | -0.33359 | -0.65844 |
| PF10 0017   | -1.47437 | -1.51949 | -1.35903 | -1.55648 | -1.49238 | -1.81611 | -1.81047 | -1.02987 | -0.62308 | 0.0763   | 0.88914  | 1.01567  | 1.142    | 0.8835   | 0.8429   | 0.50005  | -0.17266 | -0.08172 | -0.51776 | -1.15455 | -1.64185 | -2.10643 | -2.24    | -2.12941 |
| PF10 0357   | 1.05705  | 0.35908  | -0.35678 | -0.84067 | -1.35481 | -1.93278 | -2.24629 | -2.60014 | -3.30654 | -3.47592 | -3.66737 | -3.90801 | -4.0906  | -4.14627 | -3.94156 | -3.2221  | -1.68841 | -0.03176 | 0.86661  | 1.16315  | 1.39911  | 1.1885   | 1.22025  | 0.9439   |
| PFL1590c    | -0.18327 | -0.31638 | -0.20478 | -0.32464 | -0.40767 | -0.07325 | 0.02375  | 0.13039  | 0.30018  | 0.51493  | 0.59335  | 0.70555  | 0.81756  | 0.76631  | 0.41542  | 0.37308  | 0.78026  | 0.20053  | 0.15638  | -0.07781 | -0.27256 | -0.29342 | -0.38736 | -0.31386 |
| PF11 0188   | -1.35408 | -1.12512 | -0.66293 | -0.22497 | -0.26736 | 0.07107  | 0.33436  | 1.0474   | 1.60248  | 1.79491  | 1.74381  | 1.56188  | 0.99709  | 0.53956  | 0.00519  | -0.43818 | -0.84394 | -0.92954 | -1.06388 | -0.70087 | -1.22433 | -1.10373 | -1.0328  | -0.99666 |
| PF14 0156   | 0.50546  | 0.99589  | 0.53564  | 1.19467  | 1.03286  | 1.03218  | 1.16565  | 1.25826  | 1.18834  | 1.14626  | 1.04694  | 0.76777  | 0.51165  | 0.06098  | -0.07209 | -0.38619 | -0.83535 | -0.81411 | -0.91257 | -1.01995 | -0.73349 | -0.24518 | 0.03611  | 0.21774  |
| PFA0395w    | -1.38359 | -0.96148 | -0.9165  | -1.00864 | -0.51123 | -0.26521 | 0.13142  | 0.46476  | 0.67164  | 0.6508   | 0.72993  | 0.78947  | 0.69097  | 0.5321   | 0.61129  | 0.32645  | 0.01129  | -0.25519 | -0.25772 | -0.64738 | -0.7852  | -0.87841 | -0.92365 | -0.73448 |
| PFI1650w    | -0.00662 | 0.15817  | 0.35801  | 0.47482  | 0.41685  | 0.61826  | 0.70876  | 0.51778  | 0.53154  | 0.55096  | 0.63963  | 0.64938  | 0.5272   | 0.35524  | 0.35858  | 0.24717  | 0.37154  | -0.04912 | 0.32927  | 0.05155  | -0.0643  | -0.07089 | 0.03225  | 0.1966   |
| PFI0715w    | -0.36577 | 0.11983  | -0.00841 | -0.2852  | -0.18121 | -0.27716 | -0.35756 | -0.20208 | -0.25627 | -0.33921 | -0.1789  | -0.26318 | -0.18434 | -0.40828 | -0.17521 | -0.0501  | -0.24663 | -0.26286 | 0.43605  | -0.14416 | -0.3508  | -0.41606 | -0.18248 | 0.00875  |
| PF14 0102   | -0.06548 | -0.89824 | -1.54741 | -2.33968 | -3.03328 | -3.46334 | -3.95928 | -4.58799 | -5.20919 | -5.42529 | -5.53565 | -6.01134 | -5.64127 | -4.00716 | -1.41238 | -0.11776 | 0.44761  | 0.71705  | 0.87777  | 1.80872  | 0.87003  | 0.47332  | 0.6825   | -0.28302 |
| PFC0115c    | 0.3522   | 0.36561  | 0.44742  | 0.65175  | 0.84305  | 0.71988  | 0.66828  | 0.82662  | 0.35381  | 0.29243  | -0.05361 | 0.14997  | 0.04282  | 0.02952  | 0.04224  | 0.20601  | 0.39206  | 0.26636  | 0.32729  | 0.58467  | 0.52279  | 0.43901  | 0.38574  | 0.4684   |
| PFE0490w    | 0.27903  | 0.36322  | 0.34131  | 0.38566  | 0.45415  | 0.4777   | 0.5835   | 0.55724  | 0.37834  | 0.19794  | 0.12771  | 0.15972  | -0.0184  | 0.23275  | 0.23295  | 0.22873  | 0.02016  | 0.17677  | 0.47465  | 0.31207  | 0.27157  | -0.03504 | -0.15985 | -0.03777 |
| PF14 0286   | -0.67047 | -0.62433 | -0.51865 | -0.70574 | -0.61828 | -0.70539 | -0.49892 | -0.53459 | -0.37338 | 0.28213  | 0.46714  | 0.5228   | 0.60308  | 0.72343  | 0.64619  | 0.51173  | 0.26414  | 0.20723  | -0.16172 | -0.2216  | -0.57523 | -0.64856 | -0.78233 | -0.79632 |
| PFE0860c    | 1.75185  | 1.94267  | 1.43589  | 2.07642  | 2.17522  | 1.58213  | 1.15427  | 1.20205  | 0.31567  | -0.04021 | 0.04288  | -0.21556 | -0.32203 | -0.61877 | -0.81469 | -0.89118 | -0.59873 | -0.76574 | -0.56697 | 0.29044  | 1.10226  | 0.62174  | 1.32924  | 1.58207  |
| PF07 0046   | 0.05227  | 0.39957  | 0.62623  | 0.70996  | 0.66089  | 0.90459  | 0.79359  | 0.61447  | 0.59823  | 0.48692  | 0.53825  | 0.66554  | 0.56684  | 0.49236  | 0.48346  | 0.34338  | 0.16627  | -0.13329 | -0.12655 | -0.46258 | -0.61008 | -0.33008 | -0.27978 | 0.05084  |
| MAL13P1.81  | -0.09177 | -0.33536 | -0.08129 | 0.20139  | 0.31368  | 0.49311  | 0.42832  | 0.67707  | 0.86123  | 0.63376  | 0.83172  | 0.73418  | 0.45483  | -0.10939 | -0.09967 | -0.23354 | -0.51588 | -0.24086 | 0.93411  | 0.06604  | 0.01376  | -0.10983 | 0.17647  | 0.33937  |
| PF11 0375   | 0.58563  | 0.41981  | 0.6217   | 0.63692  | 0.58859  | 0.31825  | 0.22964  | 0.22327  | -0.11672 | -0.02017 | 0.00064  | 0.15681  | -0.053   | -0.01476 | -0.11877 | -0.21519 | -0.23414 | -0.31596 | -0.03638 | 0.10494  | 0.27117  |          |          |          |

|             |          |          |          |          |          |          |          |          |          |          |          |          |          |          |          |          |          |          |          |          |          |          |          |          |
|-------------|----------|----------|----------|----------|----------|----------|----------|----------|----------|----------|----------|----------|----------|----------|----------|----------|----------|----------|----------|----------|----------|----------|----------|----------|
| PFC0915w    | -0.58678 | -0.52645 | -0.56629 | -0.73973 | -0.54904 | -0.41287 | -0.17183 | -0.00967 | 0.29296  | 0.39681  | 0.59287  | 0.5286   | 0.42522  | 0.27247  | 0.32038  | 0.17848  | -0.09751 | 0.05579  | -0.13699 | -0.15042 | -0.26949 | -0.18482 | -0.24465 | -0.33066 |
| PFE0480c    | 0.26925  | -0.2078  | 0.25344  | 0.15249  | 0.1779   | 0.09843  | 0.03095  | 0.13827  | 0.08388  | 0.34031  | 0.44442  | 0.63861  | 0.64567  | 0.39972  | 0.2198   | 0.11829  | -0.25435 | 0.00646  | 0.15323  | 0.07987  | 0.41211  | 0.36788  | 0.42995  | 0.45392  |
| PF13 0171   | -0.34532 | -0.05021 | 0.11685  | 0.40726  | 0.33572  | 0.65797  | 0.45459  | 0.73896  | 0.85053  | 0.69609  | 0.8531   | 0.8105   | 0.67823  | 0.35138  | 0.19321  | -0.11909 | -0.83127 | -0.76278 | -0.8415  | -1.23128 | -1.48879 | -1.11876 | -0.87109 | -0.68894 |
| PF14 0348   | -0.83316 | -0.62498 | -0.78591 | -0.86705 | -0.6773  | -0.75669 | -0.6705  | -0.48483 | -0.28521 | 0.09811  | 0.18142  | 0.64493  | 0.47191  | 0.53066  | 0.39248  | 0.26561  | 0.45609  | 0.17385  | -0.27386 | -0.14722 | -0.34992 | -0.58348 | -0.57219 | -0.77483 |
| PFD0755c    | 0.90067  | 1.02148  | 0.62164  | 0.8509   | 0.60015  | 0.38406  | 0.13208  | 0.11087  | -0.00131 | 0.01965  | -0.12527 | -0.08578 | -0.43199 | -0.4936  | -0.64779 | -0.77307 | -0.72187 | -0.5311  | -0.39268 | 0.13754  | 0.43313  | 0.34146  | 0.65437  | 0.73439  |
| PF03 0255   | 0.12413  | -0.41699 | -0.61528 | -0.49324 | -0.62168 | -1.00261 | -1.1758  | -1.48417 | -1.86096 | -2.01121 | -1.99315 | -2.02009 | -2.13656 | -1.92964 | -1.15341 | -0.12606 | 0.84824  | 0.24498  | 1.78886  | 1.00899  | 1.15765  | 0.68362  | 0.81474  | 0.74062  |
| PFF07 0104  | 1.53112  | 0.35885  | -0.03387 | -0.49596 | -0.89234 | -1.31746 | -1.6746  | -1.95653 | -2.42817 | -2.87306 | -2.9697  | -3.13532 | -3.27495 | -3.4006  | -3.58942 | -3.20723 | 0.51266  | -0.65521 | 0.41802  | 1.05918  | 1.373    | 1.60742  | 1.37309  | 1.36382  |
| MAL8P1.99   | -0.84719 | -1.20558 | -0.63914 | -0.8557  | -0.85491 | -0.75151 | -0.71137 | -0.56112 | -0.08776 | 0.23905  | 0.53577  | 0.67712  | 0.77223  | 0.71705  | 0.62529  | 0.55075  | 0.34823  | 0.22423  | 0.16055  | -0.2813  | -0.50255 | -0.65624 | -0.70718 | -0.64124 |
| PF10 0264   | -0.57344 | -0.0777  | 0.56123  | 0.32337  | 0.54943  | 0.42478  | 0.43853  | 0.13046  | 0.35804  | 0.42255  | 0.63997  | 0.33289  | 0.34231  | 0        | -0.08039 | -0.43139 | -0.39735 | -0.85918 | -1.92313 | -2.28382 | -1.93439 | -1.45188 | -1.3496  | -0.73769 |
| PFL0825c    | 0.69329  | 0.87187  | 0.38987  | 1.22598  | 1.45575  | 1.21995  | 1.24709  | 1.52138  | 1.03992  | 0.80455  | 0.54787  | 0.42143  | 0.17985  | -0.04959 | -0.16146 | -0.13225 | -0.03084 | 0.03111  | 0.16337  | 0.40776  | 0.44661  | 0.56     | 1.00775  | 1.05192  |
| PF11 0463   | 0.11005  | -0.07194 | -0.05552 | 0.53656  | 0.69543  | 0.69546  | 0.55877  | 0.39011  | 0.14448  | 0.10445  | -0.1638  | 0.05537  | -0.05656 | 0.18782  | -0.14454 | 0.05331  | 0.26214  | -0.10308 | 0.08156  | 0.01482  | -0.01679 | 0.05606  | -0.00293 |          |
| MAL13P1.45  | -0.22128 | 0.38112  | 0.51853  | 0.51308  | 0.32612  | 0.26972  | 0.2895   | 0.43943  | 0.16129  | 0.15541  | 0.10874  | 0.13735  | 0.12552  | -0.04014 | 0.06857  | 0.02946  | 0.03919  | -0.40896 | -0.59638 | -0.68846 | -0.59386 | -0.29929 | -0.31087 | -0.21628 |
| PF11 0402   | 0.80176  | 1.04005  | 1.12329  | 1.68883  | 1.80509  | 1.97423  | 1.86416  | 1.42455  | 1.13657  | 0.64925  | 0.15078  | -0.08368 | -0.14172 | -0.20079 | -0.45389 | -0.59849 | -0.70858 | -0.86657 | -1.1912  | -0.78667 | -0.35458 | -0.09342 | 0.3009   | 0.62576  |
| PFI0785c    | 0.59231  | -0.06942 | -0.43809 | -0.33283 | -0.57024 | -0.61742 | -0.9181  | -1.1991  | -1.25439 | -1.22277 | -1.41876 | -1.47505 | -1.41386 | -1.5241  | -0.69373 | 0.08675  | 0.07738  | 0.52463  | 1.42914  | 1.06141  | 0.97251  | 0.82505  | 0.8475   | 0.72895  |
| PFL0590c    | 0.20733  | -0.20199 | -0.18921 | -0.01444 | 0.00088  | 0.11341  | 0.21176  | 0.30962  | 0.41121  | 0.14795  | 0.29079  | 0.11189  | 0.09771  | -0.21215 | -0.51827 | -0.56034 | -0.37188 | -0.356   | 0.40396  | 0.08017  | 0.15715  | 0.01876  | 0.21052  | -0.02473 |
| PF14 0365   | 0.82898  | 0.91091  | 0.65675  | 1.01386  | 0.95053  | 0.81413  | 0.77397  | 0.63815  | 0.34358  | 0.3473   | 0.53432  | 0.66527  | 0.2613   | 0.09137  | 0.19985  | 0.11884  | -0.24844 | -0.22912 | -0.04201 | -0.19704 | -0.04098 | 0.07281  | 0.37058  | 0.50221  |
| PF1145w     | 0.28376  | 0.71511  | 0.45055  | 0.78663  | 0.70317  | 0.70869  | 0.78324  | 1.32412  | 0.80162  | 0.69063  | 0.52695  | 0.56162  | 0.28007  | 0.51265  | 0.16302  | 0.00804  | -0.00916 | -0.24378 | -0.16098 | -0.23026 | -0.17715 | -0.18906 | -0.13286 | 0.24466  |
| PFL0165c    | -0.20696 | -0.144   | -0.15834 | -0.1276  | 0.03414  | -0.10755 | -0.17283 | -0.2891  | -0.12141 | 0.14346  | 0.26197  | 0.32975  | 0.39567  | 0.39694  | 0.61057  | 0.48555  | 0.08508  | 0.21121  | 0.60696  | 0.34986  | 0.26763  | 0.24054  | 0.29056  | 0.17801  |
| PFF1015w    | -1.13201 | -0.91793 | -0.74945 | -0.58262 | -0.20273 | -0.10202 | 0.21844  | 0.4122   | 0.64486  | 0.82326  | 0.87017  | 0.80086  | 0.78121  | 0.64468  | 0.4196   | 0.12955  | 0.07107  | -0.20796 | -0.44782 | -0.64119 | -0.73854 | -1.00956 | -0.95257 | -0.76225 |
| PFI0995w    | -0.25489 | -0.40925 | -0.50084 | -0.3601  | -0.06971 | -0.23393 | -0.33529 | -0.42652 | -0.28918 | -0.08693 | 0.14826  | 0.30619  | 0.49614  | 0.36073  | 0.55934  | 0.56004  | 0.47171  | 0.53602  | 0.64157  | 0.371    | 0.37635  | 0.08875  | 0.33543  | 0.4317   |
| PF11 0423   | -0.03229 | 0.15796  | -0.35304 | -0.35701 | 0.01353  | -0.03544 | 0.14669  | -0.17622 | -0.20956 | -0.11239 | -0.24568 | -0.3477  | 0.07099  | 0.33463  | 0.5278   | 0.15429  | 0.27617  | 0.67054  | 0.16921  | 0.20902  | 0.2236   | 0.11694  | 0.18242  |          |
| PF13 0315   | -0.12823 | 0.09975  | 0.22319  | 0.31306  | 0.30437  | 0.40539  | 0.42145  | 0.65933  | 0.75102  | 0.78388  | 0.65521  | 0.70257  | 0.43779  | 0.25556  | 0.03489  | -0.23352 | -0.52858 | -0.84298 | -0.9497  | -0.96642 | -0.95049 | -0.47532 | -0.35186 | -0.21183 |
| PFC0486c    | 1.35736  | 1.43805  | 1.00338  | 0.91934  | 0.93496  | 0.66349  | 0.14246  | 0.09451  | -0.33853 | -0.75226 | -0.65957 | -0.81045 | -1.12127 | -1.54117 | -1.46508 | -1.29231 | -1.61996 | -0.94846 | 0.02382  | 0.06562  | 0.34508  | 0.41535  | 0.60272  | 0.75899  |
| PFD0335c    | -0.56903 | -0.27785 | -0.37394 | -0.62888 | -1.01063 | -0.95573 | -1.05081 | -0.99035 | -0.18778 | 0.38451  | 0.66662  | 0.82304  | 1.01036  | 0.71772  | 0.87632  | 0.64201  | 0.12732  | 0.30279  | 0.35599  | -0.08191 | -0.27023 | -0.21936 | -0.23877 | -0.31454 |
| MAL13P1.300 | -0.52854 | -0.41929 | -0.27519 | -0.34404 | -0.44041 | 0.47103  | 0.44659  | 0.65624  | 0.82526  | 0.847    | 0.88443  | 0.92537  | 0.65813  | 0.46977  | 0.26776  | 0.15041  | -0.09505 | 0.07619  | -0.27929 | -0.29184 | -0.60465 | -0.42404 | -0.47651 | -0.33854 |
| PFL2295w    | 0.74728  | 1.18883  | 1.18426  | 1.19865  | 1.06935  | 1.32903  | 1.26807  | 1.2531   | 0.90367  | 0.75539  | 0.81882  | 0.41019  | 0.02708  | -0.2803  | -0.51742 | -0.82068 | -1.18483 | -1.42796 | -1.32806 | -1.22291 | -0.72082 | -0.21362 | 0.04891  | 0.53105  |
| MAL13P1.153 | 0.77096  | 1.15525  | 1.43442  | 0.86838  | 1.02729  | 1.21826  | 1.0013   | 1.09605  | 1.058    | 0.6789   | 0.76854  | 0.91289  | 0.76543  | 0.30416  | 0.18411  | -0.03029 | -0.5341  | -0.60752 | -0.47991 | -0.93335 | -0.82298 | -0.13157 | 0.16702  | 0.32592  |
| PFD0800c    | -0.5465  | -0.66635 | -0.4453  | -0.88199 | -0.78064 | -0.99153 | -1.00213 | -1.21144 | -1.3387  | -1.03956 | -0.83839 | -0.61722 | -0.02523 | 0.28329  | 0.50863  | 0.58175  | 0.615    | 0.44732  | 0.32844  | 0.22547  | 0.07201  | -0.01003 | -0.11522 | -0.27948 |
| PF11 0255   | 0.10226  | 0.283    | 0.20503  | 0.24285  | 0.24998  | 0.23636  | 0.8763   | 0.31197  | 0.28668  | 0.27145  | 0.545    | 0.52333  | 0.37667  | 0.18768  | 0.29395  | 0.18813  | -0.16276 | 0.09641  | -0.06348 | -0.26592 | -0.10265 | -0.22468 | -0.05739 | 0.17015  |
| PFE0215w    | -0.70607 | -0.80877 | -0.75967 | -0.77324 | -0.71715 | -0.769   | -0.80951 | -0.38781 | -0.0413  | 0.13167  | 0.31124  | 0.42946  | 0.70526  | 0.81842  | 0.74343  | 0.71558  | 0.26942  | 0.36861  | 0.36974  | -0.13711 | -0.3463  | -0.52623 | -0.66617 | -0.58002 |
| PF11 0099   | -1.12041 | -0.83708 | -0.56467 | -0.56796 | -0.64429 | -0.43183 | -0.2214  | -0.37156 | -0.31417 | -0.41168 | -0.4021  | -0.25004 | 0.03545  | 0.20251  | 0.5872   | 0.66282  | 0.41401  | 0.35001  | -0.07933 | -0.45462 | -0.63954 | -0.77847 | -1.01704 | -0.92741 |
| PFF0670w    | -1.29416 | -1.70329 | -1.59111 | -2.26519 | -2.45048 | -2.71777 | -2.9475  | -3.31307 | -3.31844 | -3.29496 | -3.1925  | -2.4914  | -1.43264 | -0.17393 | 0.43492  | 0.89929  | 1.37828  | 1.11241  | -0.11368 | 0.44587  | 0.20017  | -0.16066 | -0.69794 | -1.2609  |
| PF14 0318   | -0.74082 | -1.06454 | -1.01379 | -1.29059 | -1.20548 | -0.76773 | -0.17171 | -0.00382 | 0.41866  | 0.57226  | 0.52666  | 0.82799  | 0.78219  | 0.84618  | 0.46677  | 0.26625  | 0.23938  | 0.32651  | -0.22473 | 0.00972  | -0.09825 | -0.34176 | -0.63998 | -0.89736 |
| PFF0195c    | -0.41318 | -0.64094 | 0.24463  | -0.1677  | -0.17761 | -0.09195 | 0.00665  | -0.00195 | 0.7907   | 1.0611   | 1.03122  | 1.10608  | 1.06799  | 0.89111  | 0.59379  | 0.32343  | 0.22826  | -0.06817 | -0.17419 | -0.20355 | -0.24463 | -0.05475 | -0.06085 | -0.0752  |
| PF14 0238   | -0.55711 | -0.32674 | -0.58953 | -0.75084 | -0.76796 | -1.03234 | -1.03183 | -1.16572 | -1.21948 | -0.94387 | -0.67183 | -0.74176 | -0.3806  | -0.08779 | 0.45032  | 0.456    | 1.02079  | 0.64928  | 0.37168  | 0.52526  | 0.38703  | 0.00811  | -0.3296  | -0.2813  |
| PFD0990w    | -0.05532 | -0.15309 | -0.71759 | -0.38648 | -0.41226 | -0.20295 | 0.05846  | 0.424    | 0.36476  | 0.43067  | 0.61479  | 0.7779   | 0.65529  | 0.31188  | 0.42517  | 0.59628  | 0.30292  | 0.47947  | 0.49866  | 0.36111  | 0.47214  | 0.24673  | 0.35572  | -0.05298 |
| PFC1080c    | 0.13197  | 0.67224  | 0.51679  | 0.90888  | 1.13734  | 1.09557  | 1.18236  | 1.71328  | 1.45409  | 1.44269  | 1.41845  | 0.93264  | 0.68603  | 0.12152  | 0.08691  | -0.25736 | -0.40581 | -0.72296 | -0.41946 | -0.70746 | -0.75313 | -0.7416  | -0.45005 | -0.16551 |
| MAL13P1.344 | -0.58162 | -0.40473 | -0.16692 | 0.42268  | 0.62485  | 0.49511  | 0.52256  | 0.62197  | 0.73161  | 0.76542  | 0.83373  | 0.79801  | 0.81652  | 0.56948  | 0.40008  | 0.18415  | -0.11771 | -0.31505 | -0.31109 | -0.66844 | -0.92038 | -0.82231 | -0.7253  | -0.60541 |
| PFA0660w    | 1.50892  | 1.59504  | 1.60595  | 1.75121  | 1.82817  | 1.82897  | 1.69333  | 1.56445  | 1.11106  | 0.46834  | -0.10424 | -0.61655 | -0.89275 | -1.13947 | -1.1486  | -1.36021 | -1.17487 | -1.61948 | -1.10502 | -0.74817 | -0.0104  | 0.57827  | 0.93526  | 1.23361  |
| PFF0970w    | 0.37509  | 0.47975  | 0.23339  | 0.49535  | 0.27065  | 0.20793  | 0.19343  | 0.27708  | 0.28844  | 0.28354  | 0.43684  | 0.409    | 0.15096  | -0.08508 | 0.14246  | 0.10856  | -0.32163 | -0.3045  | 0.70525  | 0.18311  | 0.44162  | 0.37782  | 0.52237  | 0.58971  |
| PF13 0156   | -1.23297 | -1.00646 | -0.76518 | -0.93907 | -0.88345 | -0.81201 | -0.76699 | -0.28018 | -0.61799 | -0.38386 | -0.04775 | 0.12909  | 0.28956  | 0.25678  | 0.53272  | 0.51505  | 0.20805  | 0.26345  | -0.2431  | -0.44409 | -1.03088 | -        |          |          |

|             |          |          |          |          |          |          |          |          |          |          |          |          |          |          |          |          |          |          |          |          |          |          |          |          |
|-------------|----------|----------|----------|----------|----------|----------|----------|----------|----------|----------|----------|----------|----------|----------|----------|----------|----------|----------|----------|----------|----------|----------|----------|----------|
| PFI1710w    | -0.80602 | -1.1188  | -1.35181 | -1.63808 | -1.69857 | -1.81872 | -1.86642 | -1.87208 | -1.7303  | -1.1191  | -0.7116  | -0.08506 | 0.50538  | 1.08863  | 1.12194  | 1.07073  | 0.42399  | 0.90594  | 0.26205  | 0.02637  | -0.61478 | -1.03072 | -1.24268 | -1.39764 |
| PFI0985c    | -0.12491 | -0.33976 | -0.67365 | 0.04981  | 0.27763  | 0.29116  | 0.15518  | 0.58257  | 0.45674  | 0.21993  | 0.53002  | 0.36529  | 0.18909  | -0.03673 | 0.01466  | -0.07546 | -0.50685 | -0.21959 | 0.11863  | -0.34895 | -0.1495  | -0.06642 | -0.13987 | 0.18781  |
| MAL13P1.340 | 0.77888  | 0.7021   | 0.471    | 0.46887  | 0.66475  | 0.41398  | 0.39957  | 0.40717  | -0.01261 | 0.03392  | -0.25097 | -0.55968 | -0.57671 | -0.32005 | -0.26394 | 0.04649  | -0.08587 | 0.31353  | 0.32391  | 0.50045  | 0.45537  | 0.37526  | 0.4505   |          |
| PF0625w     | 0.15436  | 0.52659  | 0.6519   | 0.89155  | 0.78473  | 0.70184  | 0.84923  | 1.21267  | 1.26248  | 1.29506  | 1.1081   | 0.91679  | 0.53522  | 0.23679  | -0.13669 | -0.47103 | -1.05979 | -1.14593 | -1.33113 | -1.2009  | -0.92916 | -0.45103 | -0.28441 | 0.00258  |
| PF0100c     | 0.74507  | 0.95486  | 1.21288  | 0.89939  | 0.79093  | 0.96691  | 0.81409  | 0.70899  | 0.7503   | 0.60153  | 0.77248  | 0.38699  | 0.5192   | 0.27829  | 0.35149  | 0.12444  | 0.23948  | -0.30222 | -0.13536 | -0.40428 | -0.25818 | 0.08412  | 0.22619  | 0.40053  |
| PF13 0193   | -0.22132 | -0.74801 | -0.52325 | -0.86639 | -1.12551 | -1.18163 | -1.05831 | -1.53394 | -1.42878 | -1.387   | -1.20532 | -0.71519 | -0.31877 | 0.02626  | 0.4741   | 0.70073  | 0.95785  | 0.64029  | 1.16983  | 0.88776  | 0.64755  | -0.12723 | -0.49317 | -0.80823 |
| PF0085c     | -1.81051 | -2.01856 | -1.12714 | -1.66399 | -0.93182 | -0.1926  | 1.16     | 1.43344  | 1.57993  | 1.53558  | 1.31791  | 1.25818  | 0.86917  | 0.55146  | 0.0237   | -0.22244 | -0.61291 | -0.70643 | -1.11801 | -1.42688 | -1.68657 | -1.86632 | -1.88945 | -1.46195 |
| PFL1830w    | 0.03553  | 0.52922  | 0.80713  | 0.47334  | 0.32064  | 0.59628  | 0.45501  | 0.57773  | 0.41613  | 0.51391  | 0.65446  | 0.49465  | 0.61235  | 0.11973  | 0.32694  | 0.13555  | 0.23444  | -0.38307 | -0.42687 | -0.64768 | -0.78827 | -0.36617 | -0.18479 | 0.02963  |
| PF0575c     | -0.05764 | -0.05164 | -0.21848 | -0.2445  | -0.4644  | -0.68095 | -0.60391 | -0.98013 | -0.97121 | -1.12411 | -1.50096 | -1.49729 | -1.6132  | -1.59748 | -0.71647 | 0.08099  | 0.892    | 0.14618  | 1.11232  | 0.70456  | 1.00339  | 0.42965  | 0.28359  | 0.16832  |
| PFI1040c    | 0.649    | 0.77323  | 1.11946  | 1.164    | 1.22167  | 1.26966  | 1.21167  | 1.16818  | 1.16574  | 1.05094  | 0.93462  | 0.64199  | 0.39453  | 0.09445  | -0.29264 | -0.59939 | -0.60031 | -0.98951 | -1.02844 | -1.06815 | -0.80843 | -0.33838 | -0.11223 | 0.06038  |
| PF0690c     | -0.47298 | -0.61442 | -0.3354  | -0.15242 | -0.28347 | 0.05655  | 0.09333  | 0.09809  | 0.01987  | -0.27559 | -0.04081 | 0.23653  | 0.2389   | 0.41672  | 0.53488  | 0.61888  | 0.07652  | 0.4276   | 0.30133  | -0.32011 | -0.32535 | -0.02939 | -0.54661 | -0.80856 |
| PF07 0106   | 0.6108   | 0.72494  | 0.62997  | 0.91111  | 1.18485  | 1.1365   | 1.15197  | 1.42322  | 1.36327  | 1.18021  | 1.00141  | 0.60801  | 0.11461  | -0.20642 | -0.51187 | -0.8439  | -0.58258 | -1.12718 | -0.08333 | -0.38299 | -0.01759 | 0.33324  | 0.64578  | 0.73175  |
| PFL0845w    | -0.17023 | 0.08959  | 0.26544  | 0.37149  | 0.24957  | 0.13048  | 0        | 0.00934  | -0.24077 | -0.38106 | -0.28215 | -0.36341 | -0.33459 | -0.73246 | -0.54159 | -0.49711 | -0.5346  | -0.69587 | -0.40851 | -0.38471 | -0.35024 | -0.21063 | -0.21358 | 0.11558  |
| PF08 0100   | 0.3214   | 0.40094  | 0.7409   | 0.46649  | 0.26563  | 0.37775  | 0.19256  | 0.40444  | 0.14858  | 0.3717   | 0.40196  | 0.40854  | 0.25544  | 0.29723  | 0.22609  | 0.50202  | 0.26856  | 0.3509   | 0.22535  | 0.18247  | 0.2584   | 0.2476   | 0.44992  |          |
| PF14 0191   | -0.27782 | 0.33753  | 0.30459  | 0.37687  | 0.46552  | 0.40799  | 0.20543  | 0.33506  | 0.3892   | 0.40809  | 0.42815  | 0.4956   | 0.51875  | 0.271    | 0.08599  | -0.38576 | -0.46463 | -0.80963 | -1.43312 | -1.17065 | -1.13217 | -0.75615 | -0.66865 | -0.42767 |
| PF10 0272   | -0.66443 | -0.29976 | -0.0839  | -0.02943 | -0.26507 | 0.05496  | 0.07383  | 0.11838  | 0.20924  | 0.41509  | 1.16166  | 0.49653  | 0.51645  | 0.52543  | 0.37729  | 0.15002  | -0.31189 | -0.57017 | -1.18262 | -1.70579 | -1.69466 | -1.15873 | -1.27472 | -1.05057 |
| PF14 0101   | 0.02092  | -0.01869 | -0.14096 | 0.33846  | 0.27744  | 0.29013  | 0.16927  | -0.21804 | 0.07573  | 0.12976  | 0.08286  | 0.41408  | 0.52887  | 0.7602   | 0.38882  | 0.16972  | 0.502    | 0.07225  | -0.50531 | -0.20927 | -0.141   | -0.13056 | -0.19009 | -0.14126 |
| PF0635c     | 0.77273  | 0.903    | 0.56044  | 0.84667  | 0.71004  | 0.74687  | 0.63499  | 0.96959  | 0.73411  | 0.37124  | 0.51445  | 0.63992  | 0.19475  | -0.2605  | -0.20854 | -0.44478 | -0.85238 | -0.64907 | -0.22302 | -0.35784 | -0.10926 | 0.28341  | 0.56075  | 0.54905  |
| PF1460c     | 1.28455  | 0.45694  | 0.55879  | 0.12601  | 0.56751  | 0.23598  | 0.58362  | 0.49358  | -0.02937 | 0.34823  | -0.59502 | -0.12608 | -0.53706 | -0.74597 | -1.05765 | -1.19295 | -1.7945  | -0.73757 | 1.1723   | 0.92449  | 1.04373  | 1.06895  | 1.02001  | 1.99178  |
| MAL13P1.283 | -0.48402 | 0.11982  | 0.30053  | 0.26161  | 0.35228  | 0.42063  | 0.42879  | 0.69241  | 0.80454  | 0.84547  | 0.98253  | 1.04204  | 0.89958  | 0.39353  | 0.13325  | -0.37128 | -0.82861 | -1.22891 | -1.4433  | -1.72893 | -1.52112 | -1.00835 | -0.84031 | -0.58878 |
| PFL2020c    | -0.10861 | 0.12067  | -0.411   | 0.25274  | 0.24542  | 0.23804  | 0.33974  | 0.2809   | 0.24759  | 0.12656  | 0.15001  | 0.24041  | 0.27934  | 0.45175  | 0.60258  | 0.74066  | 0.58283  | 0.50654  | 0.73011  | 0.39594  | 0.03897  | -0.05085 | -0.17564 | -0.1633  |
| PF0745c     | -0.47621 | -0.31369 | -0.13964 | -0.34101 | -0.18057 | -0.39097 | -0.34215 | -0.32108 | -0.5871  | -0.40054 | -0.11262 | -0.08119 | 0.2281   | 0.23108  | 0.50101  | 0.44348  | 0.14387  | 0.17543  | 0.22046  | -0.01099 | -0.07416 | -0.09969 | -0.21843 | -0.24033 |
| PF11 0270   | -0.78546 | -0.4717  | 0.05956  | -0.03729 | -0.1148  | 0.28015  | 0.20641  | 0.36349  | 0.35326  | 0.4567   | 0.45131  | 0.42466  | 0.54082  | 0.30164  | 0.36359  | 0.1085   | -0.07628 | -0.5242  | -0.45227 | -0.9927  | -1.005   | -0.72972 | -0.83332 | -0.72358 |
| PFL0560c    | -0.25244 | -0.37859 | -0.63974 | -0.65122 | -0.60009 | -0.83999 | -0.70073 | -0.81923 | -0.79995 | -0.22963 | -0.41172 | -0.41923 | -0.14884 | 0.45242  | 0.42373  | 0.36178  | 0.64884  | 0.53778  | 0.54756  | 0.61332  | 0.44843  | -0.05814 | -0.9657  | -0.23821 |
| PFI1785w    | -1.35163 | -1.25641 | -0.76413 | -0.85105 | -0.4788  | 0.46866  | 1.23682  | 1.68509  | 2.59936  | 2.44158  | 1.99728  | 1.47864  | 0.67704  | 0.21674  | -0.2302  | -0.60345 | -0.73518 | -0.98129 | -1.17061 | -1.54763 | -1.61171 | -1.49093 | -1.96255 | -1.89675 |
| PFL0300c    | 0.09853  | -0.30391 | -0.37427 | -1.07412 | -1.33579 | -1.86557 | -2.15251 | -2.4476  | -2.91554 | -3.42368 | -3.48251 | -3.6423  | -3.55184 | -2.98514 | -1.44834 | 0.08596  | 0.86647  | 0.77366  | 1.29333  | 1.03481  | 0.98598  | 0.55773  | 0.51943  | 0.01885  |
| PF10 0361   | 0.39851  | 0.48568  | 0.52614  | 0.69442  | 0.58656  | 0.5619   | 0.46272  | 0.21034  | 0.42628  | 0.45481  | 0.36602  | 0.48758  | 0.3491   | 0.48346  | -0.02419 | -0.3975  | -0.5656  | -0.5447  | -1.28556 | -0.39264 | -0.15224 | 0.10013  | 0.26768  | 0.3638   |
| MAL7P1.208  | -0.21854 | -0.86923 | -1.34992 | -2.10848 | -2.89855 | -3.28825 | -3.46808 | -4.45059 | -4.53884 | -5.20515 | -5.34101 | -5.64407 | -5.47623 | -3.58096 | -1.1885  | 0.18975  | 0.43123  | 0.90785  | 0.68853  | 1.45502  | 1.39677  | 0.92445  | 0.87266  | -0.28962 |
| PF14 0514   | -0.77407 | -0.85578 | -0.96164 | -1.21786 | -1.20042 | -1.29041 | -1.26918 | -0.44839 | -0.17015 | 0.13518  | 0.67577  | 0.72797  | 0.83865  | 0.67163  | 0.6997   | 0.73378  | 0.31081  | 0.5074   | 0.4007   | -0.21972 | -0.46153 | -0.87306 | -1.16136 | -0.97688 |
| MAL13P1.166 | 0.57137  | 0.25984  | 0.48242  | 0.79367  | 1.1481   | 1.19187  | 1.05836  | 0.94245  | 0.56924  | 0.48643  | 0.1845   | 0.13321  | -0.09791 | -0.11472 | -0.19749 | 0.00983  | 0.52032  | 0.28927  | 0.93949  | 0.88013  | 0.91887  | 0.63838  | 0.72713  | 0.58537  |
| PFI095w     | 0.42169  | 0.39726  | 0.32538  | 0.4453   | 0.65864  | 0.3654   | 0.22092  | -0.10578 | -0.33342 | -0.54286 | -0.68482 | -0.72663 | -0.70296 | -0.3526  | -0.23677 | -0.09813 | 0.4605   | 0.47727  | 0.30909  | 0.81612  | 0.85338  | 0.63883  | 0.74615  | 0.74276  |
| PFI1230c    | -0.56201 | -0.24171 | -0.1662  | 0.32982  | 0.46775  | 0.64398  | 0.65761  | 1.10749  | 1.19062  | 1.14759  | 1.24955  | 1.11831  | 0.77045  | 0.30649  | 0.11647  | -0.18381 | -0.54698 | -0.60904 | -0.59171 | -0.69483 | -0.43653 | -0.74114 | -0.67712 | -0.44093 |
| PFI0650c    | -0.01396 | 0.2124   | 0.50446  | 0.52891  | 0.92653  | 0.98095  | 0.9432   | 1.00649  | 0.96425  | 0.76368  | 0.74976  | 0.70344  | 0.5241   | 0.43325  | 0.30036  | 0.16409  | -0.13175 | 0.02492  | -0.07778 | -0.34268 | -0.76004 | -0.60602 | -0.51769 | -0.37778 |
| PFE0080c    | -0.2229  | -1.00102 | -1.01281 | -1.59667 | -1.93502 | -2.16828 | -2.55042 | -2.86628 | -3.40895 | -4.03205 | -4.08934 | -4.50168 | -4.66423 | -4.01787 | -1.89517 | -0.10696 | 0.21875  | 0.61846  | 1.4575   | 1.36784  | 1.07955  | 0.76303  | 0.89503  | 0.10987  |
| PF14 0087   | 0.63902  | 0.90798  | 0.94962  | 1.36468  | 1.31935  | 1.5479   | 1.38295  | 1.40692  | 1.4013   | 1.30905  | 1.14195  | 0.82525  | 0.50738  | 0.23207  | 0.06188  | -0.10193 | -0.30974 | -0.41435 | -0.45161 | -0.65071 | -0.69851 | -0.37997 | -0.123   | 0.24898  |
| PF10 0152   | -0.63627 | -0.8697  | -0.81308 | -1.13542 | -1.11395 | -0.89221 | -0.5997  | -0.24659 | 0.47979  | 0.57057  | 0.72671  | 0.73881  | 0.74198  | 0.43055  | 0.42147  | 0.2829   | 0.31306  | -0.14984 | 0.1814   | -0.09901 | -0.10703 | -0.31188 | -0.07763 | -0.38981 |
| PF08 0003   | 1.73636  | 2.00591  | 1.8174   | 1.55294  | 1.36057  | 0.50578  | -0.04275 | -0.65513 | -1.68969 | -2.48874 | -2.73482 | -3.402   | -3.80401 | -4.16699 | -4.22826 | -4.49654 | -4.19342 | -3.56347 | -1.96231 | -0.32043 | 0.38857  | 0.858    | 1.10913  | 1.49741  |
| PF14 0357   | 0.15611  | -0.04041 | -0.14196 | -0.00538 | -0.08857 | -0.09583 | -0.18235 | -0.21222 | -0.42882 | -0.43729 | -0.22527 | -0.20698 | 0.08959  | 0.21372  | 0.46535  | 0.56946  | 0.67925  | 0.58666  | 0.8663   | 0.59021  | 0.49014  | 0.38164  | 0.16749  | 0.21295  |
| MAL13P1.141 | -0.20772 | -0.43027 | -0.89067 | -0.8069  | -1.27221 | -1.26862 | -1.7259  | -1.62854 | -1.72702 | -1.5258  | -1.0111  | -0.61104 | -0.29727 | -0.30564 | 0.35755  | 0.614    | 0.52834  | 0.74121  | 0.89619  | 0.47462  | 0.41638  | 0.19178  | 0.12672  | -0.2527  |
| PF10 0279   | 0.78453  | 0.94591  | 0.29159  | 0.45223  | 0.33144  | 0.05551  | -0.03295 | 0.01007  | -0.26668 | -0.33683 | -0.23226 | -0.37415 | -0.3631  | -0.42748 | -0.40408 | -0.59058 | -0.60035 | -0.29336 | -0.46006 | 0.27565  | 0.47318  | 0.52158  | 0.59822  | 0.69669  |
| PFE0380c    | -0.21635 | -0.27629 | -0.72141 | 0.20571  | 0.35557  | 0.63655  | 0.55646  | 0.57045  | 0.39249  | 0.48897  | 0.52062  | 0.59007  | 0.64353  | 0.56699  | 0.52047  | 0.523    | 0.21571  | 0.32778  | 0.33725  | 0.02646  | -0.28472 | -0.36482 | -0.21152 | -0.2921  |

|             |          |          |          |          |          |          |          |          |          |          |          |          |          |          |          |          |          |          |          |          |          |          |          |          |
|-------------|----------|----------|----------|----------|----------|----------|----------|----------|----------|----------|----------|----------|----------|----------|----------|----------|----------|----------|----------|----------|----------|----------|----------|----------|
| PFL0115w    | 0.41737  | 0.60887  | 0.60404  | 0.56418  | 0.79427  | 0.58774  | 0.67027  | 0.24162  | 0.46087  | 0.31937  | 0.04195  | 0.26851  | 0.19655  | 0.31818  | 0.16099  | 0.19616  | 0.24957  | 0.36552  | -0.07221 | 0.25166  | 0.26035  | 0.53158  | 0.4445   | 0.52721  |
| PFE0960w    | -0.23404 | -0.17042 | -0.64498 | -0.51312 | -0.82131 | -0.88539 | -0.93681 | -0.77532 | -0.53679 | -0.4793  | -0.04043 | 0.19169  | 0.38018  | 0.36713  | 0.85323  | 0.94554  | 0.51535  | 0.72068  | 1.00149  | 0.58331  | 0.45393  | 0.08147  | 0.07811  | -0.18461 |
| MAL13P1.385 | 0.45023  | 0.72409  | 0.76343  | 1.03673  | 0.91922  | 0.58127  | 0.47104  | 0.71545  | 0.55256  | 0.49433  | 0.4505   | 0.45699  | 0.42705  | 0.2862   | 0.19391  | 0.29032  | 0.16733  | 0.34003  | 0.61378  | 0.27683  | 0.21929  | 0.02905  | 0.21536  | 0.10036  |
| PFB0735c    | 0.94948  | 1.39657  | 1.42034  | 1.70998  | 1.63074  | 1.73128  | 1.42689  | 1.40092  | 1.2278   | 0.88208  | 1.05037  | 0.53421  | 0.43897  | 0.23105  | -0.07104 | -0.22209 | -0.35854 | -0.55542 | -0.8122  | -0.67679 | -0.46544 | -0.25666 | 0.01851  | 0.16994  |
| PFE0375w    | 0.29156  | 0.1379   | 0.17484  | 0.35742  | 0.4024   | 0.37187  | 0.2598   | 0.28674  | 0.20751  | -0.02892 | 0.00819  | 0.13531  | 0.0542   | 0.0232   | -0.04815 | -0.04269 | -0.25343 | -0.17655 | 0.2936   | 0.15362  | 0.26686  | 0.31954  | 0.44096  | 0.49919  |
| PF14_0492   | -0.21445 | -0.85816 | -1.11079 | -1.03121 | -1.27807 | -1.60278 | -2.0307  | -2.37199 | -2.73378 | -1.92952 | -2.07682 | -1.79501 | -1.17748 | -0.80548 | 0.00773  | 0.59228  | 0.87996  | 0.76115  | 1.04051  | 0.6367   | 0.57302  | 0.01921  | -0.09271 | -0.04392 |
| PF11_0226   | 0.89359  | 0.9816   | 0.79919  | 0.61953  | 0.57242  | 0.33691  | 0.17895  | -0.1285  | -0.28576 | -0.08594 | -0.17554 | -0.26976 | 0.03738  | -0.15795 | -0.45611 | -0.4624  | -0.2334  | -0.08127 | 0.57561  | 0.82887  | 0.98644  | 0.65321  | 0.109676 | 1.00993  |
| PF11180w    | 0.50079  | 0.17591  | 0.1102   | 0.1279   | 0.03862  | -0.38643 | -0.53528 | -0.70077 | -1.00401 | -1.19003 | -1.26452 | -1.4247  | -1.34745 | -1.20767 | -1.19746 | -0.79304 | -0.27986 | -0.04937 | 0.72542  | 0.65635  | 0.70741  | 0.69366  | 0.81872  | 0.96492  |
| PF08_0012   | -0.24226 | 0.15725  | 0.26968  | 0.48264  | 0.29106  | 0.23986  | 0.15794  | -0.37468 | -0.50911 | -0.27253 | -0.43342 | -0.11484 | 0.209    | 0.53981  | 0.54171  | 0.50923  | 0.50617  | 0.48865  | -0.22037 | 0.13906  | 0.14923  | 0.03677  | -0.08208 | -0.26931 |
| PF0155w     | -1.13729 | -1.17245 | -0.86779 | -1.11635 | -1.36523 | -1.25677 | -0.87041 | -0.16493 | 0.29637  | 0.64038  | 0.95241  | 1.14073  | 1.1772   | 0.83614  | 0.76208  | 0.63684  | 0.27833  | -0.02291 | 0.04205  | -0.6161  | -0.84915 | -0.79719 | -0.98072 | -1.01864 |
| PFL0935c    | 0.1999   | 0.03287  | 0.18223  | 0.14132  | -0.0652  | -0.21962 | -0.23646 | -0.08722 | 0.03362  | -0.14435 | -0.11665 | 0.13496  | 0.09217  | 0.08073  | 0.17262  | 0.28836  | 0.27576  | 0.26447  | 0.30379  | 0.52025  | 0.58711  | 0.09357  | 0.19122  | -0.10672 |
| PF11_0059   | -1.30674 | -1.50451 | -0.93699 | -0.73295 | 0.21345  | 0.83663  | 1.05416  | 1.31379  | 1.27963  | 1.09514  | 1.27261  | 1.15899  | 0.97155  | 0.81441  | 0.51351  | 0.32944  | -0.25027 | -0.20302 | -0.27733 | -0.73468 | -1.13085 | -1.20478 | -1.29283 | -1.13967 |
| PF11_0043   | -0.74793 | -0.02055 | 0.65351  | 0.74264  | 0.94519  | 0.65938  | 0.89805  | 0.68889  | 1.05659  | 0.61937  | 0.75509  | 0.86531  | 0.35574  | 0.08445  | 0.27722  | -0.47574 | -0.39126 | -0.75315 | -1.19022 | -2.01538 | -1.90148 | -1.40297 | -1.10829 | -0.61749 |
| PF13_0135   | 0.33803  | 0.50042  | 0.77585  | 0.88148  | 0.83173  | 0.90095  | 0.76172  | 0.48828  | 0.32818  | 0.28962  | 0.23734  | 0.33613  | 0.47142  | 0.60198  | 0.64578  | 0.43407  | 0.56921  | 0.25765  | 0.09608  | 0.0934   | -0.00698 | 0.08975  | 0.15956  | 0.2529   |
| PF10_0182   | 0.43176  | 0.26935  | -0.03039 | 0.84093  | 1.0684   | 0.40889  | 0.37238  | 1.0044   | 0.76024  | 0.5593   | 0.55716  | 0.63124  | 0.39241  | 0.3087   | -0.00758 | -0.00438 | -0.24159 | 0.27121  | 0.10345  | 0.27072  | 0.22459  | 0.00169  | 0.11044  | 0.15273  |
| PFB0130w    | -0.41952 | -0.70237 | -0.2757  | -0.45707 | -0.4867  | -0.45371 | -0.03514 | 0.00969  | 0.22781  | 0.47231  | 0.54472  | 0.78324  | 0.52883  | 0.60278  | 0.384    | 0.44047  | 0.2385   | 0.3377   | 0.11258  | 0.21772  | -0.25889 | -0.36016 | -0.36572 | -0.48215 |
| PFI0575c    | 0.3347   | -0.15608 | -0.33338 | -0.51953 | -0.77848 | -1.44268 | -1.00484 | -0.38875 | -1.57508 | -1.64628 | -1.60794 | -1.26024 | -0.7502  | -0.36913 | 0.38545  | 0.70879  | 0.54079  | 1.03876  | 1.04995  | 0.6927   | 0.58146  | 0.28894  | 0.18916  | 0.01973  |
| PFI0620w    | 0.57709  | 0.78364  | 0.35259  | 0.29161  | 0.57382  | 0.3878   | 0.24462  | 0.24936  | -0.09658 | -0.28565 | -0.12125 | -0.15116 | 0.04687  | -0.11483 | 0.04633  | -0.00347 | -0.06216 | 0.30421  | 0.78794  | 0.67165  | 0.75748  | 0.7795   | 0.88889  | 1.12788  |
| PF11_0058   | -1.36393 | -0.83198 | -0.60585 | -0.16717 | 0.16956  | 0.64861  | 0.78982  | 1.10815  | 0.91792  | 0.6636   | 1.02632  | 0.81287  | 0.79782  | 0.41601  | 0.47143  | 0.18018  | 0.09171  | -0.55108 | -0.2054  | -1.00718 | -1.19263 | -1.07606 | -1.17631 | -0.85898 |
| PF11_0114   | 0.04986  | -0.19232 | -0.49793 | -0.61575 | -0.64453 | -0.84319 | -0.96308 | -0.9789  | -1.23867 | -1.50174 | -1.46445 | -1.38304 | -0.95792 | -0.59061 | 0.20378  | 0.63117  | 0.50574  | 0.74321  | 1.21506  | 0.73397  | 0.65091  | 0.23272  | 0.13555  | 0.03393  |
| PFI0225w    | -0.02093 | -0.13461 | -0.05477 | -0.25207 | -0.18091 | -0.3401  | -0.26607 | -0.23998 | -0.26719 | -0.30452 | -0.38459 | -0.42097 | -0.17208 | 0.00017  | -0.23025 | -0.38054 | -0.1299  | -0.24287 | -0.44815 | 0.07435  | 0.14072  | 0.14984  | 0.12156  | 0.18485  |
| PF14_0474   | 0.46382  | 0.56033  | 0.60518  | 0.48391  | 0.43279  | 0.46266  | 0.56782  | 0.65598  | 0.48886  | 0.36097  | 0.53653  | 0.49615  | 0.23585  | 0.229    | 0.41522  | 0.51772  | 0.03895  | 0.15845  | 0.37424  | 0.07668  | -0.09499 | -0.14532 | 0.03183  | 0.13867  |
| PFF1055c    | 0.18889  | 0.24064  | 0.20791  | 0.58041  | 0.54628  | 0.46777  | 0.43325  | 0.54081  | 0.33901  | 0.13713  | 0.23594  | 0.31703  | 0.33391  | 0.18061  | 0.21761  | 0.20873  | -0.18877 | -0.13251 | -0.01306 | -0.35297 | -0.18711 | -0.05415 | -0.05712 | -0.07223 |
| PF11_0479   | 0.38031  | 0.63029  | 0.71119  | 0.85696  | 0.86412  | 0.83233  | 0.63891  | 0.62249  | 0.2958   | 0.16301  | 0.1036   | 0.02455  | -0.14992 | -0.13549 | -0.09589 | -0.17817 | -0.12903 | -0.15142 | -0.22503 | 0.27735  | 0.35069  | 0.65382  | 0.89695  | 0.87594  |
| PFF0780w    | 0.33907  | 0.67637  | 0.55372  | 0.72987  | 0.98509  | 1.19355  | 1.27387  | 1.13535  | 0.95273  | 0.77694  | 0.58223  | 0.52624  | 0.51188  | -0.28218 | 0.31885  | 0.31682  | -0.11156 | 0.32286  | 0.48025  | 0.45093  | 0.42611  | 0.27063  | 0.33951  | 0.33162  |
| PFE1395c    | -0.62741 | -0.35201 | -0.25448 | -0.44884 | -0.49661 | -0.39291 | -0.5193  | -0.34032 | -0.51399 | -0.65997 | 0.10623  | 0.23543  | 0.07996  | 0.15754  | 0.55958  | 0.61172  | 0        | 0.29348  | -0.00407 | -0.50825 | -0.82171 | -0.96748 | -1.12251 | -0.96406 |
| PFE1600w    | -2.52962 | -1.3994  | -0.27135 | 0.34253  | 1.72132  | 2.69971  | 3.1031   | 2.67514  | 1.97031  | 1.52391  | 0.58605  | -0.22643 | -1.16469 | -2.20882 | -2.82785 | -3.28628 | -3.61415 | -3.79333 | -3.71114 | -4.07788 | -3.93092 | -3.23404 | -2.89117 | -1.72679 |
| PFB0910w    | 1.85638  | 1.75789  | 1.02529  | 1.22488  | 0.78495  | 0.64461  | 0.05477  | -0.11838 | -0.91454 | -1.48294 | -1.86634 | -2.04925 | -2.86065 | -2.96492 | -2.74688 | -2.64961 | -1.87331 | -1.40894 | 0.25541  | 0.51487  | 0.91927  | 1.27283  | 1.22835  | 1.40821  |
| PF11_0386   | -0.64438 | -0.76814 | -0.66463 | -0.9437  | -0.8222  | -0.35584 | -0.96825 | -0.74327 | -0.663   | -0.29391 | -0.1666  | 0.27811  | 0.31069  | 0.80445  | 1.02116  | 0.3971   | 0.59939  | 1.06145  | 0.33491  | 0.15439  | -0.18544 | -0.47781 | -0.47989 |          |
| PF08_0090   | 0.43546  | -0.01359 | -0.04623 | -0.26185 | -0.27854 | -0.52087 | -0.61743 | -0.74589 | -0.61176 | -0.67883 | -0.58539 | -0.67458 | -0.64927 | -0.64276 | -0.21039 | 0.17182  | 0.51891  | 0.76014  | 1.24865  | 1.20003  | 0.76532  | 0.3574   | 0.68687  | 0.55689  |
| PF10_0132   | 0.50337  | 0.03077  | 0.21     | 0.00589  | -0.11837 | -0.07111 | -0.06707 | 0.25653  | 0.25899  | 0.19809  | 0.37336  | 0.54057  | 0.27037  | 0.20461  | 0.00815  | 0.04956  | -0.10327 | -0.10823 | 0.30599  | 0.11814  | 0.11395  | 0.14825  | 0.02735  | 0.27221  |
| PF14_0188   | 0.35365  | 0.55004  | 0.69882  | 0.66145  | 0.72777  | 0.60369  | 0.54818  | 0.49985  | 0.67218  | 0.61741  | 0.49467  | 0.43067  | 0.46282  | 0.4533   | 0.17148  | -0.179   | -0.26882 | -0.48973 | -0.68152 | -0.28958 | -0.17209 | 0.13509  | 0.21508  | 0.24463  |
| PFC0955w    | -0.48095 | -0.67424 | -0.67045 | -0.71237 | -0.61078 | -0.5226  | -0.21591 | 0.07868  | 0.29607  | 0.51131  | 0.60515  | 0.72005  | 0.57401  | 0.63719  | 0.55387  | 0.57152  | 0.37132  | 0.40719  | 0.31849  | 0.21009  | 0.1397   | -0.17933 | -0.23196 | -0.4573  |
| MAL13P1.124 | -0.73419 | -0.94177 | -1.00293 | -1.09149 | -1.05104 | -1.03834 | -0.95845 | -0.89483 | -0.68247 | -0.34233 | -0.30371 | -0.12215 | 0.17254  | 0.52993  | 0.38839  | 0.53613  | 0.66276  | 0.54247  | -0.01151 | 0.31258  | 0.26412  | -0.04008 | -0.28166 | -0.55849 |
| PF10_0141   | 0.92659  | 1.28969  | 1.14731  | 1.42363  | 1.37442  | 1.39793  | 1.22943  | 1.3635   | 1.00963  | 0.82615  | 0.84486  | 0.68628  | 0.41888  | -0.02977 | 0.18323  | -0.03831 | -0.25046 | -0.37316 | -0.51075 | -0.79037 | -0.68824 | -0.34676 | -0.06325 | 0.23867  |
| PFI0980w    | -0.07026 | -0.02453 | -0.36986 | -0.05568 | 0.12967  | 0.32515  | 0.47846  | 0.65069  | 0.65935  | 0.52002  | 0.39266  | 0.32585  | 0.37218  | 0.33849  | 0.15276  | 0.15252  | 0.08079  | 0.20517  | 0.33373  | 0.33827  | 0.51794  | 0.61364  | 0.24378  | 0.48021  |
| PFF0430w    | -0.98952 | -0.32758 | -0.22906 | -0.07149 | -0.16583 | 0.11336  | 0.13114  | 0.3004   | 0.50201  | 0.48791  | 0.79677  | 0.84733  | 0.57628  | 0.25466  | 0.00039  | -0.38957 | -0.59833 | -1.37421 | -1.25779 | -1.8313  | -1.61566 | -1.1431  | -1.03841 | -0.98081 |
| PFL1640c    | -0.66081 | -0.41681 | -0.26696 | -0.04503 | 0.19529  | 0.41128  | 0.63867  | 0.61127  | 0.49097  | 0.58356  | 0.71395  | 0.71731  | 0.64652  | 0.32771  | 0.41762  | 0.22652  | 0.15873  | -0.1695  | 0.03688  | -0.27038 | -0.41868 | -0.56043 | -0.47645 | -0.4445  |
| PF11_0269   | 0.43028  | 0.55568  | 0.71779  | 0.40579  | 0.44556  | 0.6852   | 0.56121  | 0.64659  | 0.60087  | 0.2887   | 0.43607  | 0.38398  | 0.20558  | -0.14061 | -0.16619 | -0.41457 | -1.02566 | -0.48483 | 0.02547  | -0.17819 | -0.06892 | -0.04112 | 0.16618  | 0.18226  |
| MAL13P1.71  | -0.35099 | 0.10227  | -0.12664 | 0.57048  | 0.61579  | 0.98743  | 1.14357  | 1.25969  | 1.3203   | 0.85924  | 0.7866   | 0.76888  | 0.53561  | 0.42622  | 0.33119  | 0.22906  | -0.03848 | -0.2692  | -0.33047 | -0.56742 | -0.67909 | -0.48255 | -0.50561 | -0.36845 |
| PFC0755c    | -0.84559 | -1.04125 | -0.92932 | -1.66077 | -1.96746 | -1.91808 | -1.16599 | -2.18795 | -1.57699 | -1.44011 | -0.9388  | -0.07462 | -0.03236 | 0.30468  | 0.78486  | 0.98469  | 0.70534  | 1.03888  | 0.12371  | 0        |          |          |          |          |



|                |          |          |          |          |          |          |          |          |          |          |          |          |          |          |          |          |          |          |          |          |          |          |          |          |
|----------------|----------|----------|----------|----------|----------|----------|----------|----------|----------|----------|----------|----------|----------|----------|----------|----------|----------|----------|----------|----------|----------|----------|----------|----------|
| PF14_0424      | -0.65816 | -0.57645 | -1.04445 | -0.85357 | -0.7995  | -0.93999 | -0.84746 | -0.4107  | -0.07049 | 0.10481  | 0.49714  | 0.74558  | 0.83867  | 0.77464  | 0.89205  | 0.70832  | 0.59929  | 0.29354  | 0.15212  | -0.14142 | -0.32943 | -0.4849  | -0.64168 | -0.59867 |
| PF10_0141      | -0.38075 | 0.01826  | 0.27291  | 0.23193  | 0.48715  | 0.65193  | 0.26071  | 0.3624   | 0.37546  | 0.47227  | 0.65878  | 0.28737  | 0.3856   | -0.01528 | 0.04797  | 0.02018  | -0.44697 | -0.20564 | -0.68672 | -1.36797 | -1.29222 | -1.11247 | -1.01627 | -0.84588 |
| PF10_0069      | 0.17974  | 0.37845  | 0.18168  | 0.30428  | 0.27753  | 0.32595  | 0.30931  | 0.36914  | 0.1523   | 0.16254  | 0.35485  | 0.24216  | 0.36289  | 0.32681  | 0.45155  | 0.45802  | 0.12898  | 0.41875  | 0.44375  | -0.00876 | -0.11056 | 0.01457  | 0.17998  |          |
| PF13_0015      | -0.91536 | -1.12839 | -1.51946 | -0.45565 | 0.2539   | 0.45332  | 1.094    | 1.30641  | 1.55374  | 1.44564  | 1.29999  | 1.21856  | 0.90115  | 0.5507   | 0.17547  | -0.08914 | -0.72505 | -0.52533 | -0.99666 | -0.8116  | -0.78776 | -0.67783 | -0.81657 | -0.89022 |
| PFF1140c       | 0.07055  | 0.05191  | 0.21453  | 0.10027  | 0.18461  | -0.04579 | 0.13304  | 0.71068  | 1.22639  | 1.00834  | 1.06739  | 0.96277  | 0.74315  | 0.58757  | 0.2467   | 0.15611  | -0.10096 | -0.09744 | -0.14707 | -0.01103 | -0.04541 | -0.2091  | -0.01539 | -0.08446 |
| PF14_0255      | -0.59401 | -0.63749 | -0.56396 | -0.69494 | -0.65288 | -0.41374 | -0.22319 | -0.0386  | 0.0812   | 0.30219  | 0.71033  | 0.81001  | 1.00171  | 0.73794  | 0.68832  | 0.50366  | 0.07771  | 0.1987   | -0.06679 | -0.22126 | -0.26704 | -0.34406 | -0.35773 | -0.27595 |
| PFL115w        | 0.32275  | -0.07904 | -0.1344  | 0.28109  | 0.42202  | 0.37535  | 0.13292  | 0.27643  | 0.19333  | 0.1622   | 0.23639  | 0.34953  | 0.27672  | 0.35305  | 0.23884  | 0.42969  | -0.08122 | 0.42897  | 0.62478  | 0.29632  | 0.12357  | -0.16638 | 0.01147  | 0.06907  |
| PF11_0395      | -0.17109 | -0.3568  | -0.60136 | -0.73356 | -0.68344 | -0.7579  | -0.88367 | -1.08876 | -1.38472 | -1.33194 | -1.43162 | -1.26429 | -0.82576 | -0.12089 | 0.35103  | 0.86525  | 1.16012  | 0.93356  | 0.63497  | 0.84045  | 0.75446  | 0.51899  | 0.09026  | -0.36379 |
| PFA0280w       | -0.14073 | -0.13527 | -0.22379 | -0.17197 | -0.12573 | -0.19635 | -0.24205 | -0.38122 | -0.16321 | -0.03838 | -0.07883 | 0.01705  | 0.33081  | 0.60148  | 0.29241  | 0.28722  | 0.46869  | 0.44813  | -0.19304 | 0.42418  | 0.38377  | 0.41833  | 0.3662   | 0.22937  |
| MAL13P1.68     | -0.1586  | -0.18393 | -0.00471 | -0.36403 | -0.31857 | -0.32818 | -0.47468 | -0.03624 | 0.76639  | 0.97595  | 0.87498  | 0.8421   | 0.75716  | 0.32402  | 0.06564  | -0.08717 | -0.46304 | -0.2853  | -0.30674 | 0.25031  | 0.33048  | 0.19667  | 0.50217  | 0.73863  |
| PF11_0037      | -0.42085 | -0.39941 | -0.16889 | 0.06461  | 0.1837   | 0.63798  | 1.01601  | 1.01224  | 1.25813  | 1.05116  | 0.75408  | 0.56566  | 0.40957  | 0.32692  | -0.04855 | -0.18167 | -0.31397 | -0.03293 | -0.18606 | -0.05593 | 0.16285  | 0.54053  | 0.38761  | 0.21664  |
| PFL0225c       | -0.14424 | 0.40183  | 0.01186  | 0.10256  | 0.1005   | 0.40123  | 0.38469  | 0.54816  | 0.797    | 0.63651  | 0.96265  | 0.87959  | 0.70677  | 0.41187  | 0.44036  | 0.43162  | 0.0578   | -0.02717 | 0.19147  | -0.61161 | -0.84745 | -0.50614 | -0.49685 | -0.2473  |
| PFI0295c       | -0.69906 | -0.72836 | -0.8001  | -0.34445 | -0.1307  | 0.38077  | 0.58836  | 0.8665   | 1.1618   | 1.20889  | 1.08771  | 0.98995  | 0.8746   | 0.81247  | 0.37241  | 0.10175  | 0.00837  | -0.03072 | -0.51142 | -0.47905 | -0.40705 | -0.35866 | -0.59173 | -0.62755 |
| PFE0785c       | -0.26333 | -1.0482  | -1.03313 | -1.78606 | -1.90057 | -1.48918 | -1.94005 | -2.11952 | -2.862   | -2.6565  | -2.59931 | -2.41017 | -2.59668 | -1.83949 | -0.15643 | 0.58403  | 1.22699  | 1.18655  | 1.09404  | 0.84431  | 0.96014  | 0.61314  | -0.00095 | -0.57894 |
| PF10_0233      | -0.27424 | -0.43928 | -0.66308 | -0.47058 | -0.33669 | -0.49687 | -0.20213 | -0.0895  | 0.00838  | 0.18792  | 0.37948  | 0.40777  | 0.50051  | 0.29241  | 0.42562  | 0.16738  | -0.01632 | -0.19884 | 0.19776  | -0.02497 | 0.2223   | -0.19917 | -0.04775 | 0.13328  |
| PFA0190c       | 0.50574  | 0.27932  | -0.11578 | 0.0607   | 0.13763  | 0.11035  | -0.23842 | -0.16148 | -0.60238 | -0.61434 | -0.54032 | -0.75848 | -0.54475 | -0.34867 | 0.16726  | 0.63359  | 0.69276  | 0.71346  | 1.38933  | 0.86265  | 0.86661  | 0.42681  | 0.39647  | 0.35688  |
| PF14_0406      | 0.64072  | 0.64164  | 0.17625  | 1.39622  | 1.74688  | 1.10285  | 0.79116  | 0.9981   | 0.34531  | 0.3953   | 0.40066  | 0.59551  | 0.41086  | 0.34821  | 0.09973  | 0.13292  | -0.21532 | 0.36972  | 0.16455  | 0.17504  | -0.03818 | -0.05216 | 0.00408  | -0.10645 |
| MAL7_trNA_His1 | 0.57867  | 1.48151  | 0.07237  | 0.11805  | -0.27503 | 0.23583  | -0.28653 | 0.76109  | -0.42043 | 0.03341  | 0.08849  | 0.08233  | -0.09154 | -0.21614 | -0.16059 | -0.26042 | -1.49759 | 0.29464  | 0.23399  | -0.20533 | -0.15237 | 0.53335  | 0.14186  | -0.31158 |
| PF13_0129      | -0.536   | 0.23142  | 0.43742  | 0.33187  | 0.46357  | 0.55327  | 0.32324  | 0.71721  | 0.36282  | 0.47062  | 0.5847   | 0.42872  | 0.27755  | 0.2016   | 0.16968  | 0.04963  | -0.82668 | -0.71526 | -1.20384 | -1.76299 | -1.7371  | -1.53368 | -1.43215 | -1.03876 |
| PFI0495w       | -0.49536 | -0.33476 | 0.0053   | 0.05933  | 0.11448  | 0.0604   | -0.03973 | -0.52157 | -0.47162 | -0.16187 | -0.30848 | -0.0522  | 0.30718  | 0.4311   | 0.36687  | 0.57324  | 0.35187  | -0.47158 | 0.07762  | -0.06403 | -0.15896 | -0.32556 | -0.3553  |          |
| PFC0650w       | 0.29313  | 0.00843  | 0.19847  | -0.13443 | -0.17462 | -0.38961 | -0.36633 | -0.45352 | -0.16612 | 0.14339  | 0.12439  | 0.1874   | 0.25028  | 0.37242  | 0.30988  | 0.24458  | 0.36323  | 0.56003  | 0.44414  | 0.53849  | 0.53081  | 0.38231  | 0.29059  | 0.21913  |
| PF11_0302      | -0.13392 | -0.46771 | -0.31843 | 0.00393  | 0.10814  | 0.1238   | 0.32462  | 0.93209  | 0.89725  | 0.9478   | 0.84001  | 0.3512   | 0.07562  | -0.16419 | -0.47346 | -0.8263  | -0.72955 | -1.37385 | -0.84562 | -0.7806  | -0.50904 | -0.66922 | -0.15529 | 0.29512  |
| PFC0310c       | -0.81233 | -0.84819 | -0.90195 | -1.28029 | -1.27654 | -1.43462 | -1.24477 | -1.204   | -0.84824 | -0.56305 | -0.20783 | -0.02425 | 0.19891  | 0.20627  | 0.66879  | 0.67388  | 0.59169  | 0.49847  | 0.58227  | 0.2062   | 0.00771  | -0.48853 | -0.5899  | -0.78251 |
| PF13_0146      | -0.48047 | -0.23733 | 0.12756  | 0.05206  | 0.36323  | 1.30139  | 1.69325  | 1.75926  | 1.64547  | 1.22225  | 0.76228  | 0.49585  | 0.34505  | -0.18814 | -0.45898 | -0.5526  | -0.3587  | -0.88182 | -0.4821  | -0.14322 | -0.19421 | -0.06897 | 0.07373  |          |
| PFL1780w       | 0.05195  | -0.45214 | -0.61034 | -0.71462 | -0.69085 | -0.74786 | -0.7652  | -0.74473 | -0.84326 | -0.84032 | -0.43962 | -0.48574 | -0.19926 | 0.03167  | 0.34634  | 0.76694  | 0.72623  | 0.82677  | 1.01331  | 0.71822  | 0.59209  | 0.08134  | -0.13123 | -0.42318 |
| PFI0160w       | -0.82285 | -1.07053 | -1.26755 | -1.45579 | -1.57387 | -1.69806 | -1.83617 | -2.17706 | -2.43222 | -2.24333 | -2.09075 | -1.6573  | -0.6837  | 0.4044   | 0.60592  | 0.85374  | 0.96064  | 0.93153  | -0.10692 | 0.4341   | 0.10826  | -0.09296 | -0.63132 | -0.86388 |
| PF11_0346      | 0.60813  | 0.98303  | 0.71605  | 1.21415  | 1.70108  | 1.30263  | 1.03044  | 1.69034  | 1.02924  | 0.88584  | 0.81293  | 0.69897  | 0.00932  | -0.22608 | -0.47277 | -0.40169 | -0.32976 | -0.06776 | 0.04594  | 0.219    | 0.37715  | 0.52068  | 0.79448  | 1.04388  |
| PF14_0466      | 0.21685  | 0.42332  | 0.141    | 0.36457  | 0.26328  | 0.59788  | 0.64697  | 1.05809  | 1.13224  | 0.80452  | 0.85257  | 0.84856  | 0.53179  | 0.5167   | 0.49822  | 0.41495  | 0.06969  | 0.10079  | 0.05829  | -0.31336 | -0.18758 | -0.11376 | -0.08378 | 0.02086  |
| PF11_0260      | -0.97285 | -0.06016 | 0.19124  | 0.35852  | -0.06529 | 0.01171  | 0.28471  | 0.44428  | 0.43189  | 0.4484   | 0.3406   | 0.36189  | 0.34526  | 0.05684  | 0.19603  | -0.06196 | -0.92562 | -0.86519 | -1.63753 | -2.12493 | -2.14609 | -1.41329 | -1.42253 | -1.2136  |
| PF14_0448      | -0.84074 | -0.32072 | -0.02069 | 0.18398  | 0.07083  | 0.25751  | 0.47649  | 0.56605  | 0.86695  | 0.71988  | 1.04458  | 0.59724  | 0.42691  | 0.28502  | 0.2075   | -0.08854 | -0.73799 | -0.58153 | -1.12736 | -1.56128 | -1.58166 | -1.34392 | -1.20679 | -1.00506 |
| PFC0525c       | -0.96433 | -1.17992 | -1.25084 | -1.56751 | -1.20968 | -1.39626 | -1.37294 | -1.03134 | -0.73473 | -0.5501  | -0.18075 | -0.18425 | 0.08158  | 0.26738  | 0.50604  | 0.5942   | 0.23989  | 0.3977   | 0.3417   | -0.09739 | -0.22929 | -0.35975 | -0.4546  | -0.56602 |
| PFD0005w       | 0.52201  | 0.28256  | -0.13545 | -0.08505 | 0.11903  | -0.00972 | -0.27185 | -0.16313 | -0.23933 | -0.22535 | -0.26847 | -0.24316 | 0.043    | 0.11414  | 0.12557  | 0.06338  | -0.14152 | 0.16397  | 0.14529  | 0.32218  | 0.47604  | 0.41198  | 0.31611  | 0.35504  |
| PFF0540c       | -0.56507 | -0.90565 | -1.12207 | -1.32397 | -1.36702 | -1.42886 | -1.57461 | -1.45907 | -1.19322 | -0.98534 | -0.36965 | 0.06201  | 0.46966  | 0.5592   | 0.74209  | 0.86976  | 0.66315  | 0.49103  | 0.69332  | 0.59554  | 0.07412  | -0.25611 | -0.59252 | -0.72518 |
| MAL13P1.475    | -0.15191 | 0.43205  | 0.19969  | 0.01171  | 0.02649  | 0.0267   | -0.22097 | -0.38946 | -0.43086 | -0.22084 | -0.07301 | 0.11293  | 0.3078   | 0.45621  | 0.25068  | 0.33726  | 0.41713  | 0.58747  | 0.46697  | 0.54275  | 0.65362  | 0.85275  | 0.52783  | 0.37013  |
| PF10_0009      | -2.64046 | -2.67044 | -2.56976 | -3.01723 | -2.6078  | -1.81264 | 0.29957  | 1.58619  | 2.50235  | 2.28063  | 1.74538  | 1.76092  | 0.90431  | -0.19707 | -1.31309 | -2.21847 | -2.73806 | -2.8659  | -3.26742 | -3.47866 | -2.87595 | -3.44248 | -3.73592 | -3.63748 |
| PF11_0078      | 0.28102  | 0.58895  | 0.50032  | 0.65301  | 0.63113  | 0.47887  | 0.80462  | 0.89123  | 0.85708  | 0.65896  | 0.83117  | 0.71191  | 0.67078  | 0.63763  | 0.5608   | 0.38167  | 0.23351  | 0.0836   | 0.03407  | -0.31363 | -0.12474 | -0.16022 | -0.09088 | -0.03848 |
| PFE0065w       | 0.84157  | 1.37982  | 2.44044  | 2.38545  | 3.15444  | 2.7725   | 2.22964  | 1.0819   | 0.36152  | -0.64027 | -1.66507 | -2.71706 | -3.15695 | -4.02238 | -4.27943 | -4.52214 | -4.47101 | -4.81878 | -4.27163 | -3.25135 | -1.74318 | -0.42566 | 0.2165   | 0.6642   |
| PF13_0041      | 0.75748  | 0.29084  | 0.2202   | 0.44282  | 0.52929  | 0.33354  | 0.36984  | 0.31588  | 0.01477  | -0.20233 | -0.32398 | -0.37145 | -0.41632 | -0.36379 | -0.29286 | -0.29323 | -0.21379 | 0.04355  | 0.85103  | 0.75836  | 0.93867  | 0.91504  | 1.01444  | 0.99946  |
| PFL2380c       | -0.11659 | -0.2201  | -0.53457 | -0.38969 | -0.35338 | -0.24335 | -0.36049 | -0.17563 | -0.18711 | -0.19442 | 0.00801  | 0.06296  | 0.07992  | 0.25319  | 0.30644  | 0.41211  | 0.33046  | 0.45896  | 0.48279  | 0.11771  | 0.11689  | 0.03696  | -0.2528  | -0.38283 |
| PFL1310c       | -0.77639 | -0.70551 | -0.4295  | -0.27335 | -0.13339 | 0.19758  | 0.30184  | 0.63187  | 0.95467  | 1.05541  | 0.89651  | 0.90853  | 0.8789   | 0.64572  | 0.41247  | 0.25389  | -0.14938 | -0.04965 | -0.18301 | -0.59648 | -0.88255 | -0.69414 | -0.71792 | -0.7812  |
| MAL8P1.101     | -0.72218 | -0.89576 | -1.27833 | -1.06613 | -1.19013 | -1.13883 | -0.94527 | -0.68944 | -0.21164 | 0.00738  | -0.1502  | 0.02998  | 0.23224  | 0.47304  | 0.6795   | 0.72263  | 0.86437  | 0.73337  | 0.36673  | 0.41115  | 0.16219  | -0.190   |          |          |

|             |          |          |          |          |          |          |          |          |          |          |          |          |          |          |          |          |          |          |          |          |          |          |          |          |
|-------------|----------|----------|----------|----------|----------|----------|----------|----------|----------|----------|----------|----------|----------|----------|----------|----------|----------|----------|----------|----------|----------|----------|----------|----------|
| PF13_0095   | -1.22331 | -1.59036 | -1.26774 | -2.10015 | -2.18045 | -2.34991 | -2.44682 | -2.12142 | -1.46012 | -0.79365 | -0.21496 | 0.15634  | 0.44168  | 0.59589  | 0.87531  | 0.83629  | 0.27262  | 0.57671  | 0.17126  | -0.23383 | -0.48394 | -0.84244 | -1.12166 | -1.43792 |
| PF14_0437   | 0.36197  | 0.46027  | 0.48925  | 0.52376  | 0.5981   | 0.6268   | 0.53491  | 0.75294  | 0.65482  | 0.62519  | 0.72047  | 0.51535  | 0.47399  | -0.07711 | -0.30898 | -0.64681 | -1.0274  | -0.98719 | -1.01208 | -0.96284 | -0.59607 | -0.25116 | -0.08478 | 0.17748  |
| PFE0185c    | -0.65553 | 0.18982  | 0.49457  | 0.36485  | 0.24217  | 0.55627  | 0.41848  | 0.64384  | 0.66786  | 0.67905  | 0.59763  | 0.74535  | 0.48917  | -0.01674 | 0.16076  | -0.16522 | -0.77057 | -0.85424 | -0.87189 | -1.50751 | -1.40308 | -1.00482 | -0.90043 | -0.89749 |
| MAL13P1.102 | 1.0213   | 0.51225  | 0.06397  | 0.17483  | 0.05141  | -0.46194 | -0.65831 | -1.05804 | -1.62731 | -1.97896 | -2.08227 | -2.12393 | -2.29069 | -2.18844 | -1.98668 | -1.46089 | -0.11351 | 0.00926  | 1.48079  | 1.43084  | 1.67912  | 1.28402  | 1.60218  | 1.52213  |
| PF10_0204   | -0.12429 | -0.19906 | -0.25616 | -0.3564  | -0.4397  | -0.44961 | -0.53042 | -0.22664 | 0.20353  | 0.15278  | 0.38169  | 0.51743  | 0.70111  | 0.57179  | 0.53618  | 0.59255  | 0.22838  | 0.41127  | 0.64664  | 0.29579  | 0.08092  | 0.01964  | -0.15238 | -0.3856  |
| MAL7P1.218  | 1.45431  | 1.93118  | 1.21678  | 1.69897  | 0.87126  | 1.24245  | 1.21556  | 2.13     | 1.29719  | 0.41497  | 0.44698  | 0.33807  | 0.10663  | 0.01132  | -0.06431 | 0.07292  | 0.14995  | -0.05476 | 0.1433   | -0.36609 | -0.20308 | -0.05237 | -0.3508  | -0.26822 |
| PF14_0098   | 0.40143  | 0.47765  | 0.49729  | 0.74491  | 0.9654   | 0.94106  | 0.8663   | 0.95033  | 0.95676  | 0.35496  | 0.60638  | 0.41829  | 0.21084  | -0.01503 | 0.03403  | -0.21252 | -0.39657 | -0.20091 | -0.29551 | -0.47311 | -0.41419 | -0.28663 | 0.14337  | 0.2458   |
| PF14_0666   | -1.02485 | -0.9456  | -0.66654 | -1.06563 | -1.18404 | -1.12949 | -0.93805 | -0.45265 | -0.20002 | 0.15365  | 0.38797  | 0.38018  | 0.44953  | 0.14705  | 0.29167  | 0.22023  | 0.13856  | 0.24724  | 0.17714  | -0.15129 | -0.24259 | -0.38685 | -0.31436 | -0.62171 |
| PF13_0254   | -0.5287  | -0.39427 | -0.43954 | -0.36772 | -0.2243  | -0.15165 | -0.08251 | -0.16657 | 0.08744  | 0.34526  | 0.28203  | 0.37323  | 0.5401   | 0.90896  | 0.50867  | 0.35034  | 0.29565  | 0.28018  | -0.63762 | -0.04551 | -0.10106 | 0.18834  | 0.06582  | -0.01961 |
| PF13_0162   | 1.05481  | 1.12707  | 1.35494  | 1.50557  | 1.53454  | 1.16139  | 0.58214  | 0.09286  | -0.27671 | -0.28474 | -0.35109 | -0.43394 | -0.44416 | -0.6243  | -1.02927 | -1.2353  | -1.24929 | -1.50895 | -1.33242 | -0.53024 | -0.13783 | 0.19876  | 0.57757  | 0.78423  |
| PFL2165w    | -0.26158 | -0.13691 | -0.22486 | 0.58335  | 0.65757  | 0.31959  | 0.09158  | 0.03844  | -0.15802 | -0.26662 | 0.01594  | 0.17487  | 0.31269  | 0.46896  | 0.50207  | 0.39624  | 0.33131  | 0.07407  | 0.14121  | -0.00855 | -0.04726 | 0.07616  | 0.54251  | 0.87786  |
| MAL8P1.53   | -0.75092 | -1.37013 | -1.28891 | -1.52223 | -1.47872 | -1.6954  | -1.63392 | -1.41915 | -0.93871 | -0.5448  | -0.22994 | 0.16687  | 0.20494  | 0.45321  | 0.40993  | 0.66156  | 0.52573  | 0.5102   | 0.69581  | 0.48076  | 0.12133  | -0.16899 | -0.31058 | -0.70988 |
| PDF1105w    | 0.0043   | -0.46975 | -0.66815 | -0.88076 | -1.15915 | -1.48171 | -1.60731 | -1.91518 | -2.27368 | -2.83159 | -2.98354 | -3.28083 | -3.35212 | -3.04872 | -1.42999 | 0.03643  | 1.10783  | 1.16601  | 1.72711  | 1.03071  | 1.05521  | 0.60695  | 0.67905  | 0.51065  |
| PF10_0277   | 0.57786  | 0.93878  | 0.64217  | 0.96367  | 1.00714  | 0.98553  | 0.89162  | 1.08068  | 0.94369  | 0.80472  | 0.74443  | 0.53636  | 0.13593  | -0.22546 | -0.55529 | -0.94549 | -1.25361 | -1.14014 | -1.20938 | -1.19382 | -0.55512 | -0.39035 | -0.21166 | 0.2451   |
| PFF0320c    | 0.68221  | 1.04747  | 0.83094  | 1.30061  | 1.37317  | 1.36783  | 1.22279  | 0.95833  | 0.8372   | 0.57415  | 0.36357  | 0.19403  | 0.15778  | -0.00675 | -0.23131 | -0.34577 | -0.59187 | -0.36762 | -0.59074 | -0.46533 | -0.44844 | 0.05571  | 0.28025  | 0.52896  |
| PF14_0606   | 0.08343  | -0.04982 | -0.10321 | -0.36934 | -0.44717 | -0.30042 | -0.15011 | -0.1284  | -0.16352 | -0.03603 | 0.312    | 0.30507  | 0.37776  | -0.00256 | 0.20499  | 0.21821  | 0.09916  | 0.32371  | 0.63256  | 0.27168  | 0.46125  | 0.3634   | 0.23596  | 0.1042   |
| PF11_0107   | 0.11205  | -0.1457  | 0.03327  | 0.12769  | 0.13591  | 0.22836  | 0.13131  | 0.0186   | -0.44373 | -0.63823 | -0.67969 | -0.80674 | -0.77134 | -0.56585 | -0.13043 | 0.47521  | 0.59973  | 0.45306  | 0.77144  | 0.55801  | 0.58848  | 0.30059  | 0.24705  | -0.11234 |
| PF10_0344   | 0.33228  | -0.18005 | -0.4053  | -1.16523 | -1.67221 | -1.94036 | -2.33864 | -2.80567 | -3.19824 | -3.70177 | -3.7856  | -4.23979 | -4.22845 | -4.19561 | -3.15071 | -1.5148  | -0.11944 | 0.43855  | 1.30487  | 1.36233  | 1.22424  | 1.23654  | 0.92753  | 0.60497  |
| PF14_0029   | -0.28976 | -0.6991  | 0.06518  | -0.49168 | -0.09878 | 0.22344  | 0.65117  | 0.14905  | 0.14218  | -0.18304 | -0.36376 | -0.33112 | -0.19645 | 0.27112  | 0.22443  | 0.26706  | 0.53318  | 0.20721  | 0.23725  | 0.33777  | 0.24533  | 0.2797   | 0.39838  | 0.5347   |
| MAL8P1.108  | -0.41976 | -0.09633 | 0.39402  | 0.20017  | 0.2386   | 0.58047  | 0.90693  | 0.75745  | 0.85277  | 0.81346  | 0.84487  | 0.75586  | 0.75573  | 0.45144  | 0.22405  | -0.03243 | 0.02548  | -0.48311 | -0.43871 | -0.79593 | -0.90479 | -0.63194 | -0.37566 | -0.36201 |
| PFL1665c    | 0.58911  | 1.00209  | 0.92746  | 0.90872  | 0.86217  | 0.89561  | 0.82206  | 0.62786  | 0.81096  | 0.78443  | 0.74696  | 0.633    | 0.40981  | 0.16186  | -0.00372 | -0.17123 | -0.28602 | -0.39463 | -0.46403 | -0.44093 | -0.55433 | -0.05526 | 0.13617  | 0.31682  |
| PF1160w     | -0.00957 | -0.19862 | -0.34671 | -0.24812 | -0.14578 | -0.27806 | -0.20393 | -0.17834 | 0.19253  | 0.41307  | 0.52149  | 0.47484  | 0.40418  | 0.37054  | 0.29483  | 0.32234  | 0.18652  | 0.4998   | 0.43935  | 0.35389  | 0.2267   | -0.05476 | -0.11061 | -0.07518 |
| PFI0435c    | 0.54616  | 0.67053  | 0.71103  | 0.74297  | 1.01723  | 0.79461  | 0.63353  | 0.41953  | 0.08851  | -0.03734 | -0.04666 | -0.15416 | -0.24789 | -0.09648 | -0.04651 | 0.16604  | 0.41411  | 0.43268  | 0.25217  | 0.61632  | 0.66635  | 0.44644  | 0.52216  | 0.38672  |
| PF14_0058   | 0.19439  | 0.29327  | 0.63711  | 0.54013  | 0.4872   | 0.64936  | 0.59319  | 0.33422  | 0.20031  | 0.19819  | 0.07492  | 0.03613  | 0.0901   | 0.22447  | 0.18761  | 0.3622   | 0.01335  | -0.02952 | 0.08561  | 0.042    | -0.01507 | 0.20246  | 0.23416  |          |
| PFE0340c    | -0.10797 | -0.64439 | -0.57349 | -1.3519  | -1.54459 | -1.7672  | -1.97549 | -2.24008 | -2.64863 | -2.90866 | -0.78616 | -2.95519 | -2.60885 | -1.89808 | -0.26403 | 0.72853  | 1.24102  | 1.0267   | 1.26486  | 0.82172  | 0.76646  | 0.55238  | 0.20419  | -0.35243 |
| PF13_0269   | -0.32781 | -0.28145 | -0.6769  | 0.31155  | 0.70944  | 0.88774  | 0.82868  | 0.8347   | 0.53781  | 0.52771  | 0.48461  | 0.26554  | 0.30682  | 0.05422  | -0.02353 | -0.18058 | 0.04636  | -0.1261  | 0.58194  | 0.50257  | 0.69069  | 0.54556  | 0.97053  | 1.08124  |
| MAL13P1.250 | -0.57804 | -0.65388 | -0.33593 | -0.84123 | -0.8168  | -0.72628 | -0.78346 | -0.79413 | -0.49083 | -0.293   | -0.11304 | 0.01866  | -0.0034  | 0.04894  | 0.36     | 0.45482  | 0.2397   | 0.59934  | 0.31247  | 0.14301  | -0.02482 | -0.25242 | -0.47329 | -0.63543 |
| PFB0160w    | -0.01952 | 0.20954  | 0.27789  | 0.52322  | 0.62699  | 0.90917  | 0.79236  | 0.75319  | 0.44598  | 0.28405  | 0.37921  | 0.23595  | 0.28082  | 0.26327  | 0.44505  | 0.57092  | 0.50291  | 0.38614  | 0.79957  | 0.46371  | 0.33624  | -0.06936 | -0.00881 | -0.05063 |
| PF07_0069   | -0.09499 | -0.1869  | -0.14785 | -0.36869 | -0.3527  | -0.26125 | -0.11853 | 0.06173  | 0.48687  | 0.61924  | 0.70809  | 0.73631  | 0.5437   | 0.39695  | 0.21182  | 0.15705  | 0.33675  | -0.04249 | 0.38765  | 0.18087  | 0.3034   | 0.09763  | 0.24325  | 0.05541  |
| MAL13P1.480 | -1.43901 | -0.04327 | 1.37034  | 1.84573  | 2.4505   | 3.31207  | 3.01458  | 2.40645  | 0.81119  | 0.59102  | -0.41829 | -1.54729 | -2.697   | -3.9004  | -4.65903 | -4.94136 | -4.91911 | -5.84123 | -5.04876 | -5.40865 | -4.55561 | -2.90022 | -2.01495 | -0.87653 |
| PF13_0352   | 1.06307  | 1.06236  | 1.03792  | 1.20238  | 1.13538  | 1.00748  | 0.94707  | 1.14048  | 1.14283  | 1.01993  | 0.82856  | 0.63485  | 0.04778  | -0.23264 | -0.53218 | -0.86176 | -1.14597 | -1.38172 | -0.62178 | -0.29917 | 0.15393  | 0.56119  | 0.80414  | 0.99723  |
| PF11_0216   | -1.23567 | -1.05132 | -1.00246 | -1.00079 | -1.07595 | -0.95926 | -0.76549 | -0.44374 | -0.28501 | 0.35605  | 0.77514  | 0.89862  | 0.86505  | 0.51636  | 0.58265  | 0.35999  | 0.18166  | -0.17351 | 0.04044  | -0.32456 | -0.66664 | -0.71278 | -0.84586 | -0.83444 |
| PFE0605c    | -0.82348 | -0.44761 | 0.06096  | 0.27885  | 0.67502  | 1.09107  | 1.26306  | 1.51266  | 1.57166  | 1.54515  | 1.39336  | 1.16688  | 0.94817  | 0.58486  | 0.19048  | -0.04332 | -0.47667 | -0.72673 | -0.80416 | -1.10534 | -1.23593 | -1.10228 | -0.94036 | -0.68212 |
| PF13_0136   | 0.0191   | 0.28299  | 0.18295  | 0.55885  | 0.56892  | 0.42547  | 0.38015  | 0.56134  | 0.30055  | 0.17896  | 0.30434  | 0.24173  | 0.21149  | 0.11949  | 0.22917  | 0.04248  | -0.20162 | -0.13558 | -0.26208 | -0.45055 | -0.47903 | -0.3198  | -0.35037 | -0.10922 |
| PF14_0489   | 0.12725  | 0.39229  | 0.61912  | 0.85193  | 0.73172  | 0.63842  | 0.91589  | 0.82439  | 0.93833  | 0.8699   | 0.8727   | 0.7015   | 0.17677  | 0.5606   | 0.2867   | 0.19342  | -0.05248 | -0.13862 | -0.29381 | -0.4979  | -0.55905 | -0.48465 | -0.53532 | -0.36114 |
| PF07_0070   | -0.32276 | -0.35667 | -2.87404 | 0.05723  | -0.31337 | 0.37891  | 0.48539  | 0.75204  | 0.94527  | 0.92872  | 0.96826  | 0.95776  | 0.61599  | 0.48458  | 0.4608   | 0.13929  | -0.08094 | -0.14813 | -0.4146  | -0.68627 | -0.9023  | -0.70344 | -0.53945 | -0.49812 |
| PF13_0307   | -0.14024 | -0.50098 | -0.16198 | -0.57222 | -0.47555 | -0.03547 | 0.18004  | 0.29796  | 0.63124  | 0.73252  | 0.69136  | 0.63132  | 0.73473  | 0.67325  | 0.40955  | 0.26341  | 0.39771  | 0.12962  | 0.29399  | 0.21417  | 0.16084  | 0.02327  | 0.06482  | -0.16942 |
| PF10_0177b  | 1.21448  | 0.88328  | 0.52154  | 0.9977   | 1.07013  | 1.0459   | 0.86199  | 0.74049  | 0.63236  | 0.38966  | 0.02087  | 0.06659  | -0.2034  | -0.16737 | -0.33618 | -0.33386 | -0.9727  | -0.13731 | 0.41866  | 0.83111  | 0.92722  | 0.8705   | 1.13759  | 1.13083  |
| PF11_0452   | 0.83329  | 0.78054  | 0.44965  | 1.02338  | 1.181    | 0.9034   | 0.78395  | 0.9795   | 0.51214  | 0.39762  | 0.12774  | -0.05226 | -0.30591 | -0.7882  | -1.07253 | -1.23003 | -1.43961 | -1.15263 | 0.33993  | 0.29162  | 0.51236  | 0.51448  | 0.76352  | 1.0134   |
| PFI0090c    | 0.65544  | 0.70871  | 0.58372  | 0.44506  | 0.29605  | 0.27615  | 0.83285  | 1.15761  | 1.12334  | 1.04461  | 1.10627  | 0.99694  | 0.83983  | 0.70883  | 0.50234  | 0.28942  | 0.00719  | -0.2759  | -0.37533 | -0.69349 | -0.84668 | -0.61969 | -0.44517 | 0.02766  |
| MAL13P1.15  | -0.87763 | -1.01404 | -0.62587 | -0.24249 | -0.02439 | 0.33108  | 0.16747  | 0.08375  | 0.08741  | 0.13402  | 0.57756  | 0.88076  | 0.76472  | 0.71197  | 0.52825  | 0.43967  | -0.19018 | 0.24655  |          |          |          |          |          |          |

|             |          |          |          |          |          |          |          |          |          |          |          |          |          |          |          |          |          |          |          |          |          |          |          |          |
|-------------|----------|----------|----------|----------|----------|----------|----------|----------|----------|----------|----------|----------|----------|----------|----------|----------|----------|----------|----------|----------|----------|----------|----------|----------|
| PFL1295w    | -0.08367 | -0.19282 | -0.46087 | -0.354   | -0.33149 | -0.0369  | -0.12268 | -0.15403 | -0.39865 | -0.5185  | -0.61629 | -0.66469 | -0.49255 | -0.25056 | 0.33162  | 0.70853  | 0.608    | 0.77632  | 1.08374  | 0.66769  | 0.43224  | 0.15952  | 0.05231  | -0.22324 |
| MAL8P1.128  | -1.01839 | -0.91644 | -0.55315 | -0.71665 | -0.68344 | -0.51655 | -0.4307  | -0.40357 | -0.22146 | 0.10674  | 0.3679   | 0.63506  | 0.80133  | 0.58426  | 0.86623  | 0.67518  | 0.19887  | 0.23045  | 0.17182  | -0.37684 | -0.72822 | -0.84577 | -0.84548 | -0.94949 |
| MAL13P1.216 | 0.43213  | 0.6026   | 0.58508  | 0.66695  | 0.85441  | 0.51128  | 0.24886  | 0.05758  | 0.22041  | 0.02959  | 0.15261  | 0.16769  | 0.15622  | 0.25371  | 0.25936  | 0.29836  | 0.24217  | 0.41951  | 0.18973  | 0.12661  | 0.0882   | 0.08117  | 0.08666  | 0.07207  |
| PFL2170c    | -0.87508 | -0.95688 | -1.46396 | -0.42743 | -0.536   | -0.48391 | -0.03819 | 0.60588  | 0.92251  | 0.96331  | 1.06377  | 1.10831  | 0.92673  | 0.72976  | 0.52484  | 0.23491  | 0.02141  | -0.4118  | -0.35016 | -0.44499 | -0.70491 | -0.67126 | -0.58505 | -0.54581 |
| PFF0300w    | 0.48342  | 0.68291  | 0.51562  | 0.48742  | 0.42411  | 0.3422   | 0.4259   | 0.43932  | 0.39959  | 0.34385  | 0.28554  | 0.13752  | 0.06592  | -0.18559 | -0.2748  | -0.60153 | -0.71238 | -0.82002 | -0.66575 | -0.50757 | -0.14231 | 0.22075  | 0.17004  | 0.22834  |
| PF13_0337   | -0.69057 | -0.77362 | -0.64542 | -1.09156 | -1.05119 | -1.04129 | -0.66854 | -0.22833 | 0.76309  | 0.80953  | 0.81284  | 0.96755  | 0.80049  | 0.59238  | 0.51653  | 0.44677  | 0.18032  | 0.1446   | 0.25988  | -0.05008 | -0.48824 | -0.33538 | -0.50332 | -0.6235  |
| PF10_0304   | -0.40659 | -1.04883 | 0.1446   | 0.21976  | 0.31226  | 0.49818  | 0.56239  | 0.86263  | 0.63436  | 0.5072   | 0.48774  | 0.32766  | 0.0727   | -0.09458 | -0.1241  | -0.25741 | -0.11347 | -0.476   | 0.04878  | -0.34491 | -0.37108 | -0.47251 | -0.3854  | -0.22809 |
| PFI0895c    | -0.17535 | 0.23895  | 0.20003  | 0.56113  | 0.53824  | 0.65686  | 0.59947  | 0.85767  | 0.77874  | 0.77218  | 0.82149  | 0.8938   | 0.49292  | 0.15376  | 0.11411  | -0.2055  | -0.87579 | -0.85753 | -0.65265 | -1.00533 | -0.85458 | -0.38043 | -0.23661 | 0.04926  |
| PF14_0640   | 1.20067  | 1.499    | 1.37376  | 1.55732  | 1.51809  | 1.39997  | 1.09322  | 1.05581  | 0.83564  | 0.81385  | 0.82374  | 0.41968  | 0.34647  | -0.05268 | -0.11784 | -0.38634 | -0.22824 | -0.66375 | -1.02743 | -0.93972 | -0.6116  | -0.02638 | 0.23062  | 0.72448  |
| PF11_0481   | 0.818    | 1.11559  | 0.43411  | 1.11008  | 1.20632  | 0.99593  | 1.1466   | 0.80777  | 0.49409  | 0.16994  | 0.07388  | -0.10628 | -0.1682  | -0.20258 | -0.24014 | 0.26302  | 0.40713  | 0.3385   | 0.88245  | 1.08407  | 1.11162  | 1.23552  | 1.22013  |          |
| MAL8P1.141  | 1.59829  | 1.76393  | 1.39161  | 1.40886  | 1.40023  | 1.1954   | 1.24334  | 1.18899  | 0.84771  | 0.6735   | 0.42736  | 0.14313  | -0.1194  | -0.35916 | -0.6257  | -1.00948 | -0.92354 | -0.90433 | -1.04835 | -0.31766 | 0.14988  | 0.51964  | 0.87189  | 0.98558  |
| PFL0605c    | -0.36076 | -0.44894 | -0.51559 | 0.06045  | 0.39083  | 0.37123  | 0.49497  | 0.82629  | 0.79665  | 1.01961  | 1.21867  | 1.08081  | 0.7451   | 0.41288  | 0.23352  | -0.04734 | -0.31297 | -0.40508 | -0.06018 | -0.3969  | -0.32053 | -0.35233 | 0.01473  | 0.45908  |
| PF11_0414   | -0.09609 | 0.02228  | -0.29599 | -0.35018 | -0.19367 | 0.17682  | 0.10622  | 0.5108   | 0.24344  | 0.28078  | 0.29933  | 0.21884  | 0.16109  | 0.13244  | 0.11687  | 0.24382  | -0.1897  | 0.36526  | 0.64038  | 0.28634  | 0.36267  | 0.59006  | 0.48698  | 0.34509  |
| PFI0765w    | 0.77553  | 0.94528  | 0.91878  | 1.2545   | 1.04211  | 0.8057   | 1.13233  | 1.2199   | 1.16482  | 0.99594  | 0.77317  | 0.68299  | 0.19088  | -0.14021 | -0.44389 | -0.62746 | -1.14297 | -0.95129 | -1.17974 | -1.02152 | -0.42352 | -0.07973 | 1.14488  | 0.34107  |
| PFI1590c    | -0.7341  | -0.92498 | -0.82261 | -0.28257 | -0.26506 | -0.31523 | -0.19969 | 0.12604  | 0.34938  | 0.55136  | 0.5114   | 0.6459   | 0.553    | 0.59533  | 0.22581  | 0.17321  | 0.05045  | -0.07507 | -0.40774 | -0.43116 | -0.61233 | -0.80555 | -0.89705 | -0.80887 |
| PF14_0439   | -1.12681 | -0.78463 | -0.45363 | 0.44463  | 0.65111  | 1.07503  | 0.82884  | 0.8723   | 0.4918   | 0.562    | 0.86798  | 0.86949  | 0.60765  | 0.36572  | 0.1674   | -0.08192 | -0.68633 | -0.77679 | -0.76262 | -1.28219 | -1.33422 | -1.35749 | -1.20829 | -0.91056 |
| PF14_0706   | -0.86104 | -0.53472 | 0.26329  | 0.42891  | 1.08811  | 1.39956  | 1.58651  | 1.23622  | 1.46166  | 1.23721  | 0.80608  | 0.16919  | -0.06957 | -0.36363 | -0.91584 | -1.1069  | -0.87758 | -0.71782 | -1.07953 | -0.64968 | -0.41216 | -0.02196 | 0.32522  | 1.04962  |
| PFL0100c    | 0.45837  | 0.68295  | 0.7708   | 1.14333  | 1.32812  | 1.41081  | 1.16889  | 0.94462  | 0.86382  | 0.60075  | 0.63822  | 0.67874  | 0.4361   | 0.41176  | 0.12188  | 0.00747  | -0.4178  | -0.22835 | -0.34018 | -0.25531 | -0.2503  | -0.05716 | 0.05265  | 0.17769  |
| PF14_0148   | -0.39399 | -0.51924 | -0.89178 | -0.95882 | -1.08141 | -1.37268 | -1.46624 | -1.37772 | -0.91436 | -0.58693 | -0.09503 | 0.21564  | 0.58829  | 0.60282  | 0.68242  | 0.71775  | 0.26196  | 0.74503  | 0.63533  | 0.29138  | -0.04523 | -0.41514 | -0.28498 | -0.28591 |
| PFC0265c    | 0.12479  | 0.34286  | 0.38371  | 0.50019  | 0.50675  | 0.17162  | 0.19461  | 0.31164  | 0.15395  | 0.20243  | 0.3865   | 0.35607  | 0.37784  | 0.2702   | 0.43298  | 0.27138  | 0.09784  | -0.00062 | -0.08914 | -0.2189  | -0.24168 | -0.21775 | -0.20339 | -0.04069 |
| PFI0065w    | 0.77581  | 1.19084  | 0.62663  | 0.97999  | 1.07138  | 0.97295  | 0.68692  | 0.93447  | 0.46234  | 0.51486  | 0.2248   | 0.11477  | 0.09204  | 0.04539  | 0.05689  | 0.20872  | 0.00583  | 0.42528  | 0.01016  | 0.1148   | 0.11748  | 0.92798  | 0.05624  | 0.19756  |
| PF10_0245   | 0.22493  | 0.43271  | 0.34444  | 0.38334  | 0.45837  | 0.38259  | 0.18428  | -0.08741 | 0.11252  | -0.21188 | 0.01266  | -0.06246 | 0.19105  | 0.18709  | 0.25724  | 0.25879  | 0.10923  | 0.23894  | 0.60839  | 0.47812  | 0.37899  | 0.20983  | 0.46799  | 0.44156  |
| PFE0090w    | -0.688   | -0.7949  | -1.01351 | -1.09186 | -1.36594 | -1.53917 | -0.87935 | -0.8421  | -0.55583 | -0.30351 | 0.00393  | 0.26852  | 0.55636  | 0.80492  | 0.81633  | 0.77195  | 0.33131  | 0.6446   | 0.18525  | -0.03385 | -0.13013 | -0.35065 | -0.69054 | -0.91548 |
| PF14_0516   | 0.80292  | 1.22045  | 1.29377  | 1.39408  | 1.42439  | 1.1801   | 1.13148  | 1.20276  | 0.88184  | 0.49899  | 0.57238  | 0.39892  | 0.31493  | 0.20443  | 0.0842   | 0.08197  | -0.02208 | 0.08444  | 0.04927  | 0.07569  | 0.2667   | 0.19171  | 0.41035  | 0.52426  |
| PFB0750w    | -0.66971 | -0.79211 | -1.40137 | -0.75449 | -0.69711 | -0.70933 | -0.54    | -0.8607  | -0.8027  | -0.11689 | -0.04412 | 0.09204  | 0.46551  | 0.73019  | 0.90603  | 0.91329  | 0.84318  | 0.45944  | 0.7814   | 0.32294  | 0.06037  | -0.10994 | -0.26674 | -0.76734 |
| PFB0885w    | -0.88658 | -0.31689 | -0.20665 | -0.12192 | -0.0694  | -0.2135  | -0.1764  | 0.64729  | -0.16711 | 0.19642  | 0.82499  | 0.35061  | 0.04133  | 0.06472  | 0        | -0.22886 | -0.58499 | -0.44715 | -0.90101 | -1.82238 | -1.60586 | -1.61525 | -1.57233 | -1.14632 |
| PFI0720w    | 0.31086  | 0.42931  | 0.43901  | 0.37839  | 0.60825  | 0.35084  | -0.06169 | -0.0463  | -0.42744 | -0.29228 | 0.11292  | 0.20851  | 0.47127  | 0.41864  | 0.33127  | 0.1455   | -0.33637 | -0.38742 | -0.82377 | -1.13089 | -1.00632 | -0.4563  | -0.29835 | -0.13    |
| PFA0255c    | -0.9433  | -1.05129 | -1.16482 | -1.05885 | -0.82036 | -0.66367 | -0.33074 | 0.12164  | 0.56902  | 0.85516  | 1.07804  | 1.02581  | 0.83251  | 0.40171  | 0.25582  | 0.01595  | -0.21849 | -0.02255 | -0.09338 | -0.26678 | -0.27422 | -0.57253 | -0.55523 | -0.61208 |
| MAL7P1.125  | 0.75479  | 0.44564  | 0.03727  | -0.02728 | -0.2758  | -0.45654 | -0.51518 | -0.70005 | -0.98999 | -0.94502 | -0.9667  | -1.08903 | -1.10548 | -0.97847 | -0.43837 | -0.04029 | 0.2753   | 0.49735  | 1.46445  | 1.02537  | 1.15195  | 0.90499  | 0.98635  | 0.96125  |
| PF13_0348   | -0.14766 | -0.07132 | -0.29805 | 0.03619  | 0.13304  | 0.36446  | 0.40582  | 0.12859  | 0.38509  | 0.72587  | 0.55046  | 1.0016   | 0.81512  | 0.87157  | 0.5577   | 0.41903  | 0.37703  | 0.01944  | -0.4985  | -0.30952 | -0.5057  | -0.37856 | -0.14238 | -0.38642 |
| PF10_0324   | -0.25448 | 0.05076  | 0.20545  | 0.14163  | 0.11437  | 0.29248  | 0.45198  | 0.74202  | 1.00673  | 0.98958  | 1.31715  | 1.27003  | 0.91913  | 0.55384  | 0.49623  | 0.15119  | -0.26712 | -0.46048 | -0.28349 | -0.90647 | -0.91312 | -0.75935 | -0.64176 | -0.40168 |
| PF10_0015   | 3.00945  | 2.44502  | 1.87722  | 1.5299   | 1.34388  | 0.68603  | 0.07515  | 0.30679  | 0.02226  | -0.02268 | 0.01601  | -0.76748 | -0.39807 | -0.61158 | -0.80005 | -1.00683 | -1.49088 | -1.17686 | -0.95097 | -0.41152 | 0.92876  | 1.25441  | 1.42722  | 2.04734  |
| PF13_0235   | -0.0087  | 0.00505  | 0.44602  | 0.55726  | 0.63828  | 0.74129  | 0.80492  | 0.69696  | 0.91635  | 1.00082  | 0.77166  | 0.60182  | 0.59744  | 0.6657   | 0.02546  | -0.23511 | -0.16416 | -0.06855 | -0.82947 | -0.37211 | -0.27393 | -0.16305 | -0.06652 | 0.29982  |
| MAL8P1.65   | -0.25906 | 0.05388  | 0.51206  | 0.54103  | 0.50388  | 0.45835  | 0.12327  | -0.27919 | -0.28351 | -0.27496 | -0.13412 | -0.08491 | 0.32848  | 0.42233  | 0.51058  | 0.25597  | -0.12471 | 0.10765  | -0.36295 | -0.5638  | -0.5732  | -0.53486 | -0.47084 | -0.2604  |
| MAL13P1.31  | -0.83409 | -0.81344 | -0.3464  | -0.78936 | -0.75005 | -0.58423 | -0.45468 | -0.76355 | -0.17059 | 0.09296  | 0.02132  | 0.27397  | 0.52049  | 0.83885  | 0.63025  | 0.56999  | 0.44522  | 0.42895  | -0.37706 | -0.05162 | -0.25666 | -0.49294 | -0.7749  | -0.96192 |
| PFF0275c    | 0.55083  | 0.7937   | 0.18386  | 0.89522  | 0.91083  | 0.75136  | 0.54441  | 0.68603  | 0.52112  | 0.44105  | 0.36452  | 0.35586  | 0.26599  | 0.14306  | -0.09074 | -0.18319 | -0.33101 | -0.01434 | -0.10347 | 0.05867  | 0.2055   | 0.42208  | 1.8896   | 0.44197  |
| PFL1635w    | 0.02597  | 0.24647  | 0.06974  | 0.31959  | -0.02399 | 0.31438  | 0.33936  | 0.27646  | 0.53142  | 0.61334  | 0.82955  | 0.68393  | 0.61186  | 0.54271  | 0.5033   | 0.43708  | -0.04704 | 0.24976  | 0.02931  | -0.2829  | -0.47514 | -0.41681 | -0.4563  | -0.39135 |
| PF14_0710   | -0.10933 | -0.17536 | 0.39983  | 0.11946  | 0.02291  | 0.00562  | 0.04272  | -0.09756 | 0.14367  | 0.4341   | 0.48637  | 0.76629  | 0.60569  | 0.55473  | 0.41701  | 0.32628  | 0.27843  | 0.21879  | 0.02243  | 0.19317  | 0.19989  | 0.27785  | 0.20113  | 0.1416   |
| PF13_0119   | 0.18404  | 0.19756  | 0.18112  | 0.19075  | 0.04934  | 0.16493  | -0.03861 | -0.06293 | -0.27911 | -0.35291 | -0.18747 | -0.05979 | -0.33858 | -0.44231 | -0.43154 | -0.42082 | -0.46832 | -0.32172 | 0.58157  | 0.14173  | 0.15676  | -0.17043 | 0.18508  | 0.2658   |
| PFB0525w    | -0.92655 | -0.50142 | -0.17333 | 0.06755  | 0.19416  | 0.44937  | 0.28781  | 0.25237  | 0.25557  | 0.34032  | 0.66247  | 0.71873  | 0.90593  | 0.66083  | 0.6441   | 0.3432   | -0.30196 | -0.35655 | -0.7293  | -1.15502 | -1.28099 | -1.15331 | -1.15738 | -1.05347 |
| PFB0360c    | 0.07252  | -0.29785 | -0.31623 | -0.75669 | -0.951   | -0.98969 | -1.16331 | -1.43223 | -1.59712 | -1.69328 | -1.84099 | -1.53958 | -1.08076 | -0.21169 | 0.56942  | 0.95031  | 0.89583  | 1.07057  | 1.24333  | 1.00674  | 0.79713  | 0.4311   |          |          |

|             |          |          |          |          |           |          |          |          |          |          |          |          |          |          |          |          |          |          |          |          |          |          |          |          |
|-------------|----------|----------|----------|----------|-----------|----------|----------|----------|----------|----------|----------|----------|----------|----------|----------|----------|----------|----------|----------|----------|----------|----------|----------|----------|
| PF11 0286   | -0.32803 | -0.47389 | -0.55727 | -0.45177 | -0.32556  | -0.31559 | -0.5008  | -0.41247 | -0.51086 | -0.40965 | -0.46531 | -0.23652 | -0.07089 | 0.18113  | 0.44554  | 0.53135  | 0.35637  | 0.40188  | 0.57986  | 0.48541  | 0.33141  | 0.19661  | 0.02098  | 0.08085  |
| PF11 0465   | -0.1841  | -0.28511 | -0.40325 | -0.25494 | -0.52646  | -0.43183 | -0.61419 | -0.87555 | -1.10782 | -1.16669 | -1.14866 | -1.12207 | -0.6777  | -0.39039 | 0.30073  | 0.62414  | 0.64917  | 0.7808   | 0.67182  | 0.4232   | 0.35937  | 0.13424  | -0.10417 | -0.42017 |
| PFD0530c    | -0.0489  | -0.65244 | -0.58668 | -0.79087 | -0.72777  | -0.83632 | -0.69834 | -0.80852 | -0.83229 | -0.88109 | -1.0703  | -0.84053 | -0.93943 | -0.51832 | -0.4994  | -0.28558 | 0.03569  | 0.13186  | 0.60371  | 0.63245  | 0.54359  | 0.34747  | 0.49119  | 0.52118  |
| PFI0310w    | 0.77872  | 1.0207   | 0.85812  | 1.46461  | 1.39729   | 1.66883  | 1.47336  | 1.17189  | 1.14912  | 0.76802  | 0.64945  | 0.64891  | 0.29891  | 0.22122  | -0.10705 | -0.20546 | -0.23752 | -0.52491 | -0.71662 | -0.69975 | -0.61964 | -0.23486 | 0.07993  | 0.18465  |
| PF10 0284   | -0.82101 | -1.02674 | -0.5981  | -0.80293 | -0.98013  | -0.81424 | -0.43928 | -0.00703 | 0.9483   | 1.18879  | 1.1788   | 1.1897   | 1.0112   | 0.84094  | 0.53193  | 0.18238  | 0.03374  | -0.35917 | -0.4953  | -0.64416 | -0.6608  | -0.6296  | -0.71528 | -0.69575 |
| PF14 0557   | -0.21525 | 0.04274  | 0.63554  | 0.83317  | 0.91706   | 1.38295  | 1.41044  | 1.35545  | 1.39208  | 1.19604  | 1.16856  | 1.13241  | 0.79974  | 0.53812  | 0.4122   | 0.16307  | -0.20702 | -0.52785 | -0.58874 | -0.80889 | -0.87852 | -0.69128 | -0.39279 |          |
| PF11 0167   | 1.35406  | 1.359    | 0.70772  | 1.32623  | 1.20748   | 0.689148 | 0.4252   | 0.41941  | -0.48354 | -0.85846 | -0.74623 | -0.7984  | -1.05301 | -0.99261 | -0.65104 | -0.26577 | 0.28541  | 0.64545  | 1.26671  | 1.02143  | 1.39478  | 1.1846   | 1.19197  | 1.18227  |
| PF11 0435   | 0.04003  | -0.22889 | -0.4853  | -0.5025  | -0.678    | -0.59213 | -0.36773 | -0.38231 | -0.23031 | -0.32405 | -0.22064 | -0.16213 | 0.03718  | 0.26426  | 0.30251  | 0.50066  | 0.50883  | 0.55392  | 0.58081  | 0.65497  | 0.75473  | 0.4976   | 0.28789  | -0.18736 |
| MAL8P1.58   | -0.203   | -0.04615 | 0.10458  | 0.26949  | 0.28663   | 0.29079  | 0.31863  | 0.30439  | 0.29765  | 0.34663  | 0.38966  | 0.51021  | 0.32158  | 0.45214  | 0.38807  | 0.53476  | 0.08047  | 0.12568  | 0.09184  | 0.20499  | -0.00478 | -0.34545 | -0.20049 | -0.30568 |
| PFB0495w    | -0.49457 | -0.24502 | 0.21177  | 0.09923  | 0.34462   | 0.66183  | 0.94494  | 1.47144  | 0.99037  | 1.2526   | 0.90998  | 0.59767  | 0.2149   | 0.02088  | 0.02786  | -0.60581 | -1.3943  | -0.64688 | 0.48337  | 0.35519  | 0.55585  | -0.01791 | 0.67023  | 1.07304  |
| PFL2335w    | -0.04792 | 0.14516  | 0.19537  | 0.33417  | 0.23485   | 0.23872  | 0.25125  | 0.01192  | 0.07616  | -0.03661 | -0.16684 | -0.2339  | -0.09094 | 0.12911  | 0.08409  | 0.18093  | 0.0372   | 0.32276  | -0.73095 | -0.08178 | -0.02961 | -0.01032 | 0.05764  | -0.0892  |
| PF14 0694   | 0.09939  | -0.45347 | -0.8679  | -1.29489 | -1.09906  | -1.29467 | -1.46871 | -1.71693 | -1.91785 | -2.0385  | -2.07995 | -2.11016 | -1.7493  | -1.78046 | -0.73898 | -0.33686 | 0.2529   | 0.33608  | 1.6692   | 1.00663  | 0.76173  | 0.31368  | 0.87965  | 0.51431  |
| PFL0440c    | 0.50977  | 0.73266  | 0.58066  | 0.90832  | 0.94978   | 0.536    | 0.35585  | 0.42395  | -0.10705 | -0.07948 | -0.2798  | -0.2944  | -0.21933 | -0.03193 | -0.15893 | -0.06831 | -0.04184 | -0.04278 | -0.40549 | 0.01294  | 0.04318  | 0.2425   | 0.39766  | 0.44573  |
| PF11 0169   | 0.31118  | 0.72447  | 0.55145  | 1.03259  | 1.27854   | 1.50027  | 1.32789  | 1.37497  | -0.89826 | 0.26232  | 0.44906  | 0.087    | -0.20235 | -0.45219 | -0.45334 | -0.57165 | -0.08982 | -0.47517 | -0.33706 | -0.33334 | -0.55696 | -0.28541 | 0.06897  | 0.47077  |
| PFB0745w    | 0.20931  | 0.65768  | 0.99964  | 0.73103  | 0.6788    | 1.04816  | 0.84399  | 0.77374  | 1.16002  | 1.21021  | 1.19506  | 1.08096  | 0.89319  | 0.66711  | 0.32783  | 0.00073  | -0.23616 | -0.35418 | -0.6888  | -0.89157 | -0.9029  | -0.52054 | -0.59012 | -0.22399 |
| PF13 0081   | 0.34426  | 0.41394  | 0.33034  | 0.74403  | 0.81509   | 0.77981  | 0.61437  | 0.48532  | 0.03049  | 0.14228  | 0.36541  | 0.32328  | 0.6125   | 0.44104  | 0.54808  | 0.3575   | 0.5124   | 0.30525  | 0.35429  | 0.13999  | 0.25947  | 0.22342  | 0.46058  | 0.5495   |
| PF11 0277   | 0.36295  | -0.1773  | -0.23572 | -0.88415 | -1.3067   | -1.42051 | -1.65245 | -1.98817 | -2.45525 | -2.81576 | -2.9926  | -3.02534 | -3.07892 | -2.93618 | -2.77435 | -1.83892 | -0.03156 | 0.38361  | 0.66721  | 1.23184  | 1.17319  | 0.94762  | 1.23219  | 0.86495  |
| PFC0220w    | -0.63926 | -0.95927 | -0.72297 | -1.07824 | -1.10326  | -1.12803 | -1.15743 | -1.06756 | -0.7133  | -0.08717 | -0.09232 | 0.24822  | 0.42489  | 0.66501  | 0.65497  | 0.57951  | -0.60931 | 0.50029  | 0.0342   | 0.35171  | -0.23109 | -0.33139 | -0.38434 | -0.47113 |
| MAL13P1.351 | -0.07117 | 0.21438  | 0.54527  | 0.60544  | 0.54019   | 0.55793  | 0.60568  | 0.41442  | 0.2009   | 0.31866  | 0.38118  | 0.40557  | 0.54468  | 0.67113  | 0.45946  | 0.37973  | 0.29667  | 0.18674  | -0.06204 | 0.10414  | 0.15145  | 0.10764  | 0.25437  | 0.3294   |
| PF11 0170   | -0.13561 | 0.17546  | 0.52679  | 0.4409   | 0.41395   | 0.50997  | 0.57833  | 0.43859  | 0.35884  | 0.428    | 0.35575  | 0.4858   | 0.45339  | 0.1769   | 0.32606  | 0.23485  | -0.04849 | -0.07462 | 0.16084  | -0.27809 | -0.3338  | -0.19823 | -0.06417 | 0.09794  |
| PFL0075w    | 0.68621  | 1.00999  | 0.7778   | 0.96147  | 0.891     | 0.82617  | 0.82617  | 0.853    | 0.83362  | 0.71666  | 0.73785  | 0.57408  | 0.19015  | -0.06722 | -0.29214 | -0.63936 | -0.57176 | -0.95133 | -1.0324  | -0.90959 | -0.50403 | -0.08385 | 0.08369  | 0.37538  |
| PF14 0555   | 0.42431  | 0.56888  | 0.71281  | 0.66527  | 0.55798   | 0.2738   | 1.04905  | 0.06781  | -0.17589 | -0.47097 | -0.34907 | -0.216   | -0.03746 | 0.06643  | 0.466    | 0.51808  | 0.16491  | 0.44166  | 0.4331   | 0.34134  | 0.11309  | 0.00883  | 0.11302  | 0.15789  |
| PFA0540c    | -0.83637 | -0.34984 | -0.67234 | -0.9151  | -1.05507  | -1.10827 | -1.01943 | -0.52    | -0.04093 | 0.12731  | 0.55503  | 0.59271  | 0.71477  | 0.43828  | 0.67269  | 0.61058  | 0.22146  | 0.56535  | 0.56881  | 0.0457   | -0.20076 | -0.4696  | -0.5322  | -0.51849 |
| PFC0385c    | -0.00445 | 0.17235  | -0.12932 | -0.27158 | -1.38E-05 | 0.00553  | 0.01827  | 0.09679  | -0.25575 | -0.21916 | -0.3542  | -0.37256 | -0.23909 | 0.12155  | 0.20019  | 0.27311  | 0.45588  | 0.4888   | -0.0604  | 0.14071  | 0.12781  | 0.33893  | -0.08081 | -0.19851 |
| MAL13P1.338 | -0.10196 | 0.26069  | 0.39041  | 0.30117  | 0.28619   | 0.36273  | 0.42017  | 0.64099  | 0.40601  | 0.4646   | 0.54862  | 0.36222  | 0.48568  | 0.17746  | 0.27494  | 0.1356   | 0.06259  | -0.28759 | -0.31506 | -0.49664 | -0.39312 | -0.27739 | -0.31697 | -0.10902 |
| PF14 0200   | -0.80171 | -0.9218  | -0.89683 | -0.6021  | -0.39112  | 0.02523  | 0.17439  | 0.34385  | 0.61327  | 0.62868  | 0.89259  | 0.88273  | 0.88178  | 0.71475  | 0.69738  | 0.52695  | -0.01296 | 0.02035  | 0.0114   | -0.48925 | -0.74679 | -0.99965 | -1.18045 | -1.09594 |
| PF11 0503   | -0.52937 | -0.43023 | 0.3323   | 0.68913  | 1.55314   | 2.23924  | 2.10644  | 1.72605  | 1.35615  | 0.85205  | 0.05113  | -0.66367 | -1.11009 | -1.36677 | -1.68048 | -1.93024 | -1.77213 | -1.46933 | -1.78171 | -1.23539 | -1.02405 | -0.69834 | -0.38518 | 0.02561  |
| MAL13P1.97  | 0.39105  | 0.38829  | 0.54968  | 0.7961   | 0.99674   | 0.82347  | 0.77505  | 0.94054  | 0.50397  | 0.46636  | 0.34741  | 0.11889  | -0.0463  | -0.20993 | -0.24958 | -0.11527 | -0.11899 | -0.06336 | 0.33425  | 0.07336  | 0.29118  | 0.49249  | 0.39263  | 0.37205  |
| PF10 0109   | 0.20798  | 0.20425  | -0.05345 | 0.38169  | 0.68722   | 0.63326  | 0.7415   | 0.87065  | 0.62459  | 0.53865  | 0.6515   | 0.36374  | 0.21233  | 0.07237  | -0.05934 | 0.03158  | -0.31379 | -0.20071 | 0.41671  | -0.22461 | -0.2378  | -0.20639 | 0.00936  | 0.36013  |
| PF07 0119   | -0.28752 | -0.17517 | -0.30306 | -0.13775 | 0.00363   | 0.02857  | -0.05887 | 0.2714   | 0.27925  | 0.27035  | 0.53672  | 0.4541   | 0.38869  | 0.18306  | 0.25823  | 0.31305  | 0.14447  | 0.20833  | 0.51928  | 0.14714  | 0.24108  | -0.10227 | -0.05526 | 0.11654  |
| PF10 0044   | 0.54407  | 0.54626  | 0.64718  | 0.50806  | 0.5981    | 0.43632  | 0.37277  | 0.80755  | 0.38397  | 0.35847  | 0.34668  | 0.34778  | 0.33499  | 0.22833  | 0.22962  | 0.32954  | 0.34553  | 0.27453  | 0.29759  | 0.20897  | 0.20335  | 0.34066  | 0.20115  | 0.23571  |
| PFE0190c    | -1.07619 | -1.5299  | -0.52283 | -1.10381 | -1.02563  | -0.05858 | 0.31095  | 0.11972  | 0.59155  | 0.71416  | 0.78824  | 0.84884  | 0.95388  | 0.94375  | 0.7371   | 0.4349   | 0.08591  | -0.11256 | -0.29882 | -0.65737 | -0.90721 | -0.99032 | -1.13453 | -1.01421 |
| PF14 0656   | -0.29071 | -0.2455  | 0.24382  | 0.0893   | 0.03268   | 0.42893  | 0.41407  | 0.22894  | 0.46191  | 0.37183  | 0.44512  | 0.40645  | 0.54495  | 0.41318  | 0.47577  | 0.19233  | 0.13083  | -0.18273 | -0.35886 | -0.26573 | -0.43662 | -0.41442 | -0.39237 | -0.11806 |
| MAL7P1.104  | 0.39047  | 0.62435  | 0.23463  | 0.71063  | 0.51405   | 0.40708  | 0.5594   | 0.81977  | 0.67     | 0.52286  | 0.79565  | 0.61325  | 0.43742  | 0.16229  | 0.35244  | 0.12029  | 0.05528  | 0.14422  | -0.064   | -0.29825 | -0.40104 | -0.47154 | -0.32228 | -0.1476  |
| PF10 0096   | 0.71222  | 1.1228   | 0.73773  | 1.18448  | 1.20666   | 0.72943  | 0.69408  | 0.96855  | 0.90212  | 0.89836  | 0.82413  | 0.79723  | 0.56863  | 0.30783  | 0.20289  | -0.01392 | -0.0442  | -0.27545 | -0.3569  | -0.17154 | -0.12511 | 0.04404  | 0.18732  | 0.381    |
| PFE0705c    | -0.64957 | -0.62177 | -1.93125 | -0.71598 | -0.65177  | -0.73101 | -0.92539 | -1.01891 | -0.74685 | -0.50414 | -0.17138 | -0.26235 | 0.22781  | 0.35737  | 0.60128  | 0.45752  | 0.68871  | 0.52891  | 0.33078  | 0.2925   | 0.21063  | 0.08466  | -0.16434 | -0.37006 |
| PF13 0224   | 0.51735  | 0.97891  | 1.12192  | 1.37055  | 1.2028    | 1.46159  | 1.20021  | 1.55574  | 1.47868  | 1.25321  | 1.39507  | 1.20138  | 0.97453  | 0.50318  | 0.65142  | 0.25427  | -0.20642 | -0.33457 | -0.23009 | -0.59016 | -0.785   | -0.34081 | 0.07595  | 0.21537  |
| PF11 0152   | 1.35914  | 1.23512  | 0.88928  | 1.38277  | 1.09176   | 1.06945  | 0.54122  | 0.43145  | -0.1531  | -0.61029 | -0.61056 | -0.75884 | -1.27001 | -1.51729 | -1.69136 | -1.85324 | -2.23513 | -1.75626 | -0.47496 | 0.21105  | 0.63296  | 0.71443  | 1.11307  | 1.25491  |
| PF10 0350   | -2.17275 | -1.93592 | -1.14131 | -0.32901 | 1.16943   | 2.40156  | 2.76354  | 2.47362  | 2.39685  | 1.73264  | 0.7962   | -0.22529 | -1.60667 | -2.46862 | -2.78564 | -2.92726 | -3.61573 | -2.50746 | -2.53583 | -2.38124 | -2.87482 | -2.58782 | -2.28116 | -2.1317  |
| PFC0760c    | -0.21488 | -0.0657  | 0.20155  | -0.09518 | -0.17854  | -0.27104 | -0.11777 | -0.28777 | -0.24069 | -0.08568 | -0.33692 | -0.2798  | -0.09048 | 0.17861  | 0.04278  | -0.04109 | -0.13988 | 0.0715   | -0.52282 | -0.00961 | 0.11277  | 0.04268  | -0.05776 | -0.11966 |
| PF07 0035   | -0.85605 | -1.04041 | -1.06056 | -1.20723 | -1.04923  | -1.15964 | -1.12893 | -1.05497 | -0.93341 | -0.54575 | -0.19393 | 0.11421  | 0.43239  | 0.79377  | 0.70019  | 0.74793  | 0.62198  | 0.62654  | 0.20702  | 0.15396  | -0.27317 | -0.4     |          |          |

|                     |          |          |          |          |          |          |          |          |          |          |          |          |          |          |          |          |          |          |          |          |          |           |          |          |
|---------------------|----------|----------|----------|----------|----------|----------|----------|----------|----------|----------|----------|----------|----------|----------|----------|----------|----------|----------|----------|----------|----------|-----------|----------|----------|
| PFL0905c            | -0.00625 | 0.10258  | 0.14166  | 0.05317  | 0.04979  | -0.19739 | -0.13511 | -0.05046 | 0.07704  | -0.04915 | 0.15388  | 0.28336  | 0.21959  | 0.15866  | 0.21109  | 0.22658  | 0.38115  | 0.08724  | 0.12471  | 0.01387  | -0.08202 | 0.04954   | -0.11642 | -0.12386 |
| PF14_0064           | -0.42487 | -0.51673 | -0.79372 | -0.61795 | -0.54809 | -0.47726 | -0.29763 | -0.00889 | -0.05647 | 0.05763  | 0.25083  | 0.34691  | 0.40525  | 0.42619  | 0.51305  | 0.60359  | 0.41154  | 0.51248  | 0.88646  | 0.43916  | 0.14472  | -0.10802  | -0.18784 | -0.22551 |
| PFE0810c            | -0.48456 | 0.04351  | 0.44154  | 0.61297  | 0.59604  | 0.71347  | 0.3732   | 0.64199  | 0.44399  | 0.51717  | 0.72247  | 0.63732  | 0.43903  | 0.25616  | 0.15888  | -0.08953 | -0.91899 | -0.62184 | -1.07664 | -1.38894 | -1.48249 | -1.16992  | -0.96802 | -0.5245  |
| PF08_0124           | 0.38026  | 0.28575  | 0.49092  | 0.39682  | 0.34719  | 0.26198  | 0.03847  | 0.21916  | 0.21829  | 0.22941  | 0.28874  | 0.28794  | 0.29457  | -0.03089 | 0.0209   | -0.27336 | -0.0091  | -0.56546 | -0.3462  | -0.23388 | -0.03498 | 0.02696   | 0.15617  | 0.16425  |
| PFC0911c            | -0.5549  | -0.41726 | -0.24122 | -0.4678  | -0.67122 | -0.74014 | -0.65712 | -0.46609 | -0.38477 | -0.46015 | -0.1495  | 0.21624  | 0.56556  | 0.4729   | 0.67928  | 0.70857  | 0.35107  | 0.57164  | 0.90513  | 0.52413  | 0.18708  | -0.12927  | 0.11795  | 0.06894  |
| PFF1420w            | 1.29085  | 0.52285  | 0.03931  | -0.16056 | -0.55704 | -0.66195 | -1.12327 | -1.13231 | -1.31084 | -1.7639  | -1.96056 | -1.7474  | -1.9255  | -1.89914 | -1.99648 | -1.5381  | -0.3981  | -0.03495 | 1.45016  | 1.30059  | 1.35621  | 1.44087   | 1.69104  | 1.54541  |
| PF10_0199           | -0.35779 | -0.11631 | 0.26868  | 0.19667  | 0.12234  | 0.51794  | 0.59833  | 0.40029  | 0.77161  | 0.80724  | 0.69286  | 0.82941  | 0.71528  | 0.83857  | 0.48818  | 0.21093  | 0.04063  | -0.01869 | -0.43761 | -0.41668 | -0.49687 | -0.24994  | -0.24882 | -0.31362 |
| PFD0095c            | 1.74256  | 1.5574   | 1.15994  | 1.37685  | 1.11418  | 0.92164  | 0.47817  | -0.16706 | -0.63562 | -1.19669 | -1.4857  | -1.83111 | -2.4771  | -2.90398 | -3.07281 | -3.37891 | -3.44325 | -2.65003 | -0.06834 | 0.96877  | 1.16546  | 1.10771   | 1.62116  | 1.70826  |
| MAL8P1.12           | 0.41722  | 0.28807  | 0.09758  | 0.08746  | 0.03665  | -0.16421 | -0.26961 | -0.44807 | -0.80031 | -0.80837 | -0.48663 | -0.99316 | -0.89165 | -0.52992 | -0.0153  | 0.1932   | 1.10641  | 0.60852  | 0.75665  | 1.15852  | 1.09113  | 0.8414    | 0.74313  | 0.53907  |
| PF11_0485           | -0.43344 | -0.20566 | -0.36037 | -0.52145 | -0.62239 | -0.53256 | -0.38628 | -0.34939 | -0.15897 | -0.00357 | 0.30452  | 0.60731  | 0.71371  | 0.58191  | 0.80454  | 0.76379  | 0.35522  | 0.57887  | 0.18963  | 0.03146  | -0.06532 | 0.04099   | -0.11524 | -0.03275 |
| PF14_0265           | -0.35167 | -0.57795 | -0.65531 | -1.04556 | -1.16367 | -1.01039 | -0.81757 | -0.20893 | 0.41665  | 0.62707  | 0.79471  | 0.77132  | 0.75567  | 0.51456  | 0.60226  | 0.459    | 0.28677  | 0.26873  | 0.41257  | 0.1122   | -0.00535 | -0.16304  | -0.30664 | -0.5659  |
| MAL13P1.317         | 1.35592  | 1.56368  | 1.6813   | 1.69421  | 1.55498  | 1.33952  | 1.55569  | 1.16834  | 1.15562  | 0.88666  | 0.69577  | 0.52819  | 0.22921  | 0.06352  | -0.26231 | -0.62038 | -0.29628 | -0.89247 | -1.0575  | -0.65568 | -0.1213  | 0.28848   | 0.52354  | 0.95764  |
| PF14_0573           | 0.68109  | 0.1881   | 0.79175  | 0.26517  | 0.24702  | 0.11514  | 0.08864  | -0.01267 | 0.18378  | 0.28325  | 0.2686   | 0.09253  | 0.06916  | -0.04576 | -0.17485 | -0.22191 | -0.30049 | -0.37963 | 0.77294  | 0.37693  | 0.36965  | 0.13969   | 0.46415  | 0.6141   |
| PFE0585c            | -0.97294 | -0.83633 | -0.80482 | -0.81766 | -0.83665 | -0.75613 | -0.89799 | -0.81075 | -0.85716 | -0.33511 | -0.05668 | 0.38796  | 0.63727  | 0.61845  | -0.70507 | 0.73519  | 0.34767  | 0.46025  | 0.02688  | -0.40303 | -0.73903 | -0.178402 | -1.0184  | -1.17887 |
| PF13_0290           | -0.18393 | -0.02342 | 0.02909  | 0.29376  | 0.20526  | 0.18361  | 0.2185   | 0.27633  | 0.3181   | 0.40192  | 0.21294  | 0.2732   | 0.23974  | 0.20975  | 0.32764  | 0.12983  | 0.45672  | 0.15872  | -0.01817 | 0.04416  | -0.01189 | -0.07549  | -0.04554 | -0.01909 |
| PFD0885c            | 0.14643  | 0.021    | -0.20197 | -0.0982  | -0.19588 | -0.49968 | -0.42778 | -0.54168 | -0.29874 | -0.22612 | -0.37963 | -0.36231 | -0.36731 | -0.3414  | -0.51386 | -0.27755 | -0.18853 | 0.10764  | -0.59384 | 0.20943  | 0.4593   | 0.39807   | 0.42929  | 0.23523  |
| PF11_0179           | 0.36264  | 0.19897  | 0.073    | 0.42292  | 0.64855  | 0.71584  | 0.29134  | -0.01194 | -0.49476 | -1.04912 | -0.8533  | -0.68409 | -0.75141 | -0.49377 | -0.28825 | -0.05468 | 0.10419  | 0.4437   | 0.37472  | 0.14856  | -0.028   | 0.23643   | 0.30798  |          |
| PF14_0110           | 0.30588  | 0.22821  | 0.09541  | 0.0479   | 0.01329  | -0.06756 | -0.11523 | -0.16035 | -0.44865 | -0.56162 | -0.70159 | -0.86572 | -1.12001 | -1.23698 | -1.45399 | -1.36979 | -0.5431  | -0.73737 | 0.31637  | 0.3871   | 0.48786  | 0.3448    | 0.52195  | 0.59975  |
| PFF0490w            | 0.8398   | 0.72573  | 0.6878   | 0.27059  | -0.00343 | -0.06931 | -0.09405 | -0.2192  | -0.11584 | -0.00015 | -0.07824 | -0.0078  | 0.0339   | 0.02127  | -0.062   | 0.14288  | 0.43075  | 0.58757  | 0.61731  | 0.64866  | 0.83079  | 0.66862   | 0.52196  | 0.22104  |
| MAL13_tRNA_Ar<br>g3 | 0.94287  | 1.35433  | 0.32735  | 0.2551   | 0.04963  | 0.38345  | 1.74E-05 | 0.39859  | -0.17732 | -0.24499 | -0.36731 | -0.4409  | -0.42605 | -0.65408 | -0.35133 | 0.05321  | -0.62643 | 1.04181  | 0.72466  | 0.44131  | 0.62785  | 1.47297   | 0.91269  | 0.65939  |
| PFE0405c            | 0.41449  | 0.4344   | 0.07655  | 0.22821  | 0.25371  | 0.25077  | 0.08398  | 0.09587  | -0.29063 | -0.46977 | -0.23927 | -0.29719 | -0.01918 | 0.24408  | 0.53839  | 0.77434  | 0.27079  | 0.90493  | 1.03525  | 0.85603  | 0.79848  | 0.66479   | 0.58619  | 0.5653   |
| PFF1250w            | 0.09121  | 0.15472  | 0.48759  | 0.78951  | 0.89631  | 1.2644   | 1.10177  | 0.85368  | 0.83291  | 0.73864  | 0.52726  | 0.71862  | 0.61947  | 0.71914  | 0.47313  | 0.36262  | 0.21575  | 0.19263  | 0.02335  | -0.20154 | -0.38164 | -0.25014  | -0.07138 | -0.00106 |
| PF07_0013           | -0.03635 | -0.10203 | 0.04383  | 0.50677  | 0.75324  | 0.20512  | 0.40859  | 1.39328  | 1.2537   | 0.97667  | 0.88645  | 0.87308  | 0.48478  | 0.46577  | 0.19853  | 0.09346  | 0.10413  | 0.2177   | 0.13808  | -0.06347 | 0.10502  | 0.0195    | -0.11354 | -0.12542 |
| MAL13P1.190         | -1.01046 | -0.92103 | -0.75166 | -0.63989 | -0.53235 | -0.31677 | -0.2649  | -0.19966 | -0.26706 | -0.06211 | 0.0958   | 0.3767   | 0.52854  | 0.44185  | 0.7702   | 0.73635  | 0.46686  | 0.54167  | 0.26653  | -0.05155 | -0.31123 | -0.53217  | -0.65917 | -0.83988 |
| PFD0440w            | -0.16946 | -0.68188 | -0.95077 | -1.09102 | -1.1801  | -1.46003 | -1.34164 | -0.72624 | 0.3544   | 0.52461  | 0.73778  | 0.91781  | 0.8611   | 0.7762   | 0.66718  | 0.41931  | 0.22933  | 0.17499  | -0.11231 | -0.15058 | -0.30716 | -0.30588  | -0.58508 | -0.63786 |
| PFL715w             | 0.10728  | 0.23971  | 0.41712  | 0.50206  | 0.60741  | 0.72321  | 0.57678  | 0.92788  | 0.86541  | 0.86703  | 0.68683  | 0.78731  | 0.55407  | 0.45152  | 0.1671   | 0.18817  | -0.16721 | -0.02403 | -0.05061 | -0.24921 | -0.40825 | -0.25959  | -0.18947 | 0.09031  |
| PFD0935c            | -0.60539 | -0.69888 | -0.67686 | -0.94339 | -0.88512 | -1.01913 | -0.94612 | -0.70567 | -0.23741 | -0.06367 | 0.02712  | 0.21534  | 0.23163  | 0.44439  | 0.50763  | 0.61384  | 0.67834  | 0.4517   | 0.54387  | 0.44276  | 0.16857  | -0.16396  | -0.42335 | -0.616   |
| PF11_0083           | 0.01629  | -0.33635 | -0.59374 | -0.63629 | -0.63255 | -0.66418 | -0.76112 | -0.81513 | -1.0565  | -0.8565  | -0.10341 | -0.79805 | -0.61594 | -0.19829 | 0.37991  | 0.73953  | 0.67391  | 0.8813   | 0.81222  | 0.70906  | 0.60757  | 0.33223   | 0.09623  | -0.25774 |
| MAL8P1.30           | -1.05166 | -1.0235  | -1.24064 | -1.22835 | -1.4021  | -1.45054 | -1.25682 | -1.24089 | -1.0204  | -0.72179 | -0.34759 | -0.1133  | 0.34577  | 0.52664  | 0.85903  | 0.92539  | 0.50097  | 0.61509  | 0.5461   | 0.23462  | -0.2663  | -0.60718  | -1.0346  | -0.99791 |
| PFD0865c            | -0.90462 | -0.89407 | -0.91838 | -1.05077 | -1.0846  | -0.51025 | 0.0067   | 0.18257  | 0.28534  | 0.34728  | 0.34065  | 0.45803  | 0.51876  | 0.67877  | 0.54546  | 0.43747  | 0.29581  | 0.32215  | -0.23472 | -0.14091 | -0.47322 | -0.74102  | -0.86973 | -0.9612  |
| PF10_0124           | 0.06307  | 0.04965  | 0.14156  | -0.03384 | -0.17006 | -0.09516 | -0.31439 | -0.50748 | -0.39276 | -0.23457 | -0.23635 | -0.10696 | 0.14495  | 0.45211  | 0.36409  | 0.41158  | 0.57351  | 0.42457  | 0.03722  | 0.18356  | 0.06445  | -0.08523  | -0.29588 | -0.45238 |
| PFB0295w            | 0.59661  | 0.48833  | 0.5265   | 0.62936  | 0.40043  | 0.44401  | 0.54185  | 0.6048   | 0.43188  | 0.37073  | 0.62702  | 0.32033  | 0.26994  | 0.01894  | 0.02517  | -0.10186 | -0.34025 | -0.22284 | -0.01627 | -0.22836 | -0.40918 | -0.22002  | 0.14111  | 0.38204  |
| PF1265w             | -0.4344  | -0.44628 | -0.16572 | -0.19725 | -0.1448  | 0.05019  | -0.00891 | -0.02568 | 0.14097  | 0.42858  | 0.5165   | 0.64163  | 0.61319  | 0.82885  | 0.34711  | 0.24322  | 0.16038  | 0.19837  | -0.49058 | -0.09416 | -0.11705 | -0.21553  | -0.27331 | -0.27911 |
| MAL7P1.157a         | -0.0391  | 0.311    | 0.33711  | 0.25681  | 0.35174  | 0.45869  | 0.44555  | 0.49856  | 0.46457  | 0.40181  | 0.3194   | 0.4908   | 0.46952  | 0.44444  | 0.28736  | 0.07009  | 0.00743  | -0.03576 | -0.40687 | -0.50405 | -0.42219 | -0.28216  | -0.29323 | -0.22686 |
| PFD1120c            | -0.81154 | -1.22271 | -1.25052 | -1.49829 | -1.26396 | -1.20414 | -1.08701 | -1.15721 | -1.42381 | -1.3239  | -1.36247 | -1.36335 | -1.12164 | -0.54587 | 0.21401  | 0.55241  | 0.55294  | 0.77086  | 0.38664  | 0.62586  | 0.78236  | 0.21166   | 0.13354  | -0.00814 |
| PF10_0265           | -0.46373 | -0.54308 | -0.31429 | -0.30177 | -0.34059 | -0.31871 | -0.47067 | -0.5128  | -0.08685 | 0.48086  | 0.55727  | 0.56977  | 0.75141  | 0.70033  | 0.54439  | 0.38664  | 0.38412  | 0.03095  | -0.2558  | -0.2773  | -0.21975 | -0.19166  | -0.20566 | -0.27255 |
| PF14_0580           | -0.72385 | -0.93349 | -2.00765 | -0.57188 | -0.48664 | -0.44513 | 0.0143   | 0.09899  | 0.2725   | 0.38072  | 0.31692  | 0.32953  | 0.33505  | 0.49184  | 0.67736  | 0.52099  | 0.4415   | -0.00479 | 0.25428  | -0.02757 | -0.44232 | -0.67143  | -0.50977 | -0.50659 |
| PF08_0081           | 0.60602  | 0.61437  | 0.71419  | 1.26742  | 1.40162  | 1.24891  | 1.20109  | 0.72936  | 1.00646  | 0.71113  | 0.64681  | 0.53092  | 0.21317  | -0.15006 | -0.27249 | -0.53525 | -0.77766 | -0.8337  | -0.71376 | -0.97237 | -0.49219 | -0.27586  | -0.08981 | 0.07281  |
| PFL0365c            | 0.55146  | 0.98671  | 1.05431  | 1.3996   | 1.43669  | 1.2754   | 1.34149  | 1.10161  | 0.38812  | 0.44351  | 0.57497  | 0.26736  | 0.30257  | 0.02224  | -0.09628 | -0.18821 | -0.32798 | -0.18078 | 0.24466  | -0.02116 | 0.45093  | 0.32973   | 0.64774  | 0.89522  |
| PFE0360c            | 1.65158  | 1.00592  | -0.12162 | 0.38674  | 0.19296  | -0.51528 | -0.90595 | -1.09833 | -1.67259 | -1.90336 | -2.07294 | -2.14333 | -2.02016 | -2.18916 | -1.85985 | -1.83194 | -0.90046 | -0.14123 | 1.20125  | 1.42026  | 1.74548  | 1.5141    | 1.63735  | 1.71547  |
| PF14_0135           | 1.04574  | 0.47953  | 0.32569  | -0.38989 | -0.49059 | -0.83758 | -1.16623 | -1.42166 | -1.68092 | -2.74723 | -1.68917 | -1.50046 | -1.45787 | -1.35216 | -1.41998 | -1.11929 | -0.32902 | -0.1255  | 0.51517  | 0.9599   | 1.148    |           |          |          |

|             |          |          |          |          |          |          |          |          |          |          |          |          |          |          |          |          |          |          |          |          |          |          |          |          |
|-------------|----------|----------|----------|----------|----------|----------|----------|----------|----------|----------|----------|----------|----------|----------|----------|----------|----------|----------|----------|----------|----------|----------|----------|----------|
| PF10_0229   | -0.11756 | -0.02783 | -0.60944 | -0.53954 | -0.28941 | -0.36167 | -0.40254 | -0.41147 | -0.28685 | -0.46152 | -0.22958 | -0.0381  | 0.04271  | 0.30515  | 0.56275  | 0.64016  | 0.50693  | 0.42329  | 0.46488  | 0.06575  | 0.01476  | -0.04109 | -0.12778 | -0.07466 |
| PFL0610w    | -0.35667 | -0.40235 | -0.20266 | -0.57557 | -0.58948 | -0.50335 | -0.17517 | -0.06841 | 0.50267  | 0.79349  | 0.69456  | 0.86114  | 0.82726  | 0.67868  | 0.42048  | 0.13105  | 0.07581  | 0.09112  | -0.47038 | -0.25987 | -0.24732 | -0.16742 | -0.13686 | -0.05239 |
| PF13_0169   | 1.28489  | 0.65928  | -0.81506 | 0.20554  | -0.14358 | -0.35895 | -0.59671 | -0.67675 | -1.04554 | -1.03875 | -1.28437 | -1.18255 | -1.17298 | -1.1942  | -1.31631 | -1.2193  | -0.54964 | 0.11268  | 1.10101  | 1.26974  | 1.3803   | 1.48196  | 1.53745  | 1.4117   |
| PFB0755w    | -0.2137  | -0.24284 | -0.43418 | -0.41602 | -0.31871 | -0.14911 | 0.06554  | 0.24061  | 0.26975  | 0.16259  | 0.15812  | 0.18117  | 0.3062   | 0.4244   | 0.44964  | 0.50124  | 0.2535   | 0.53996  | 0.23375  | 0.40127  | 0.1735   | -0.09827 | -0.26395 | -0.49931 |
| MAL7P1_76   | 0.73228  | 1.39421  | 1.12678  | 1.43679  | 1.35742  | 1.19796  | 0.92646  | 0.82084  | 0.4385   | 0.11395  | 0.17484  | 0.05214  | -0.0527  | -0.40761 | -0.47504 | -0.89108 | -1.35561 | -1.5403  | -1.65132 | -1.43144 | -0.67956 | 0.08972  | 0.15014  | 0.31002  |
| PFD0750w    | 0.08484  | 0.38131  | -1.66547 | 0.43627  | -0.05005 | 0.37641  | 0.3153   | 0.03172  | 0.30897  | 0.15552  | 0.21779  | 0.64397  | 0.53504  | 0.12739  | 0.29525  | 0.19981  | -0.14223 | -0.41172 | 0.18048  | -0.40077 | -0.20003 | 0.24993  | 0.48041  | 0.05069  |
| MAL13P1.56  | -0.40367 | -0.4895  | -0.48265 | 0.05664  | 0.37488  | 0.60519  | 0.57858  | 0.59644  | 0.60476  | 0.77524  | 0.67542  | 0.70452  | 0.43818  | 0.41093  | -0.18138 | -0.44975 | -0.57722 | -0.61497 | 0.23998  | -1.41716 | -1.18931 | -0.95028 | -0.78626 | -0.59639 |
| PF14_0391   | -0.62141 | -0.09892 | 0.52397  | 0.40967  | 0.37983  | 0.58096  | 0.72619  | 0.55025  | 0.6208   | 0.80514  | 0.55537  | 0.79641  | 0.43617  | 0.10391  | -0.25046 | -0.55983 | -1.66172 | -0.81335 | -1.49012 | -1.71395 | -1.80768 | -1.42129 | -1.278   | -0.82204 |
| PF11_0311   | -0.25068 | -0.34466 | -0.12418 | -0.00503 | -0.12109 | -0.11995 | 0.1792   | 0.36341  | 0.60018  | 0.61333  | 0.68408  | 0.72255  | 0.7155   | 0.63079  | 0.3938   | 0.1136   | 0.09137  | -0.00769 | -0.56604 | -0.34418 | -0.56442 | -0.70827 | -0.71578 | -0.62397 |
| PFL1845c    | -0.92818 | -0.60513 | -0.07124 | -0.27881 | -0.29767 | -0.03969 | 0.1906   | 0.70637  | 1.16094  | 1.29088  | 1.45227  | 1.57075  | 1.26078  | 0.90164  | 0.57772  | 0.26087  | -0.74374 | -0.46761 | -0.67345 | -1.02158 | -1.00037 | -1.0942  | -1.01708 | -0.82607 |
| MAL7P1.82   | -0.23681 | -0.45996 | -0.73375 | -0.72295 | -0.70926 | -0.76225 | -0.98465 | -0.99331 | -1.44247 | -1.22238 | -0.99062 | -0.76286 | -0.23211 | 0.09432  | 0.58924  | 0.87773  | 0.91206  | 0.73805  | 0.96239  | 0.5588   | 0.51216  | -0.05145 | -0.20959 | -0.04572 |
| MAL13P1.164 | -0.83797 | -0.83376 | -0.91032 | -0.8696  | -0.95092 | -0.9505  | -0.91263 | -0.70365 | -0.21718 | 0.11387  | 0.46008  | 0.76477  | 0.9907   | 0.87078  | 0.87276  | 0.66326  | 0.36234  | 0.213    | 0.29836  | -0.18092 | -0.34358 | -0.51505 | -0.52975 | -0.69151 |
| PFL1785c    | -0.14889 | -0.38351 | -0.64206 | -0.56985 | -0.48716 | -0.89655 | -1.03339 | -0.94915 | -1.50691 | -1.53967 | -1.34351 | -1.52253 | -1.52249 | -1.47842 | -0.84774 | 0.11488  | 0.37149  | 0.38565  | 1.35105  | 1.02371  | 0.84607  | 0.47043  | 0.59013  | 0.44428  |
| MAL13P1.158 | -0.10129 | -0.17435 | -0.32874 | -0.18732 | 0.02237  | 0.31113  | 0.51612  | 0.78669  | 1.0892   | 0.97706  | 0.85673  | 0.88783  | 0.6342   | 0.44561  | -0.27722 | 0.02835  | -0.21372 | -0.26608 | 0.03063  | 0.02719  | 0.22953  | 0.06967  | 0.11274  | 0.23836  |
| PFF0805c    | -0.51818 | -0.53866 | -0.79225 | -0.77612 | -0.89334 | -0.89823 | -0.78813 | -0.65982 | -0.45299 | -0.1148  | 0.02166  | 0.10035  | 0.46544  | 0.37749  | 0.52238  | 0.56792  | 0.76613  | 0.38209  | 0.38663  | 0.22489  | 0.14369  | -0.22875 | -0.23808 | -0.43255 |
| PF13_0299   | -0.63274 | -0.94178 | -1.00633 | -1.43416 | -1.43067 | -1.7149  | -1.95944 | -2.05237 | -2.37286 | -2.12653 | -1.71137 | -1.29486 | -0.56714 | -0.01126 | 0.50553  | 0.69389  | 0.87162  | 0.89056  | 0.49887  | 0.71056  | 0.58681  | 0.10186  | -0.04462 | -0.37794 |
| PFI0825w    | -0.10071 | 0.27025  | 0.70338  | 0.43609  | 0.27432  | 0.19068  | 0.1145   | 0.09117  | -0.30468 | -0.40737 | -0.36199 | -0.23061 | -0.13887 | -0.30739 | 0.00922  | -0.01288 | 0.15219  | 0.07793  | -0.25725 | -0.18111 | -0.4857  | -0.34691 | -0.26136 | -0.22367 |
| PFE1105c    | 0.35508  | -0.20778 | -0.10907 | -0.1203  | -0.20929 | -0.25769 | -0.41933 | -0.46668 | -0.81457 | -1.21209 | -1.26058 | -1.62707 | -1.36282 | -1.27743 | -0.83559 | -0.30032 | 0.31747  | 0.47017  | 1.25045  | 1.12766  | 1.20364  | 0.8527   | 1.09852  | 1.25958  |
| PF10_0121   | -2.67921 | -2.38984 | -1.73595 | -1.63933 | -0.99902 | -0.56433 | -0.4571  | 0.20626  | 0.69361  | 1.33315  | 1.2423   | 2.00788  | 1.19041  | 0.83236  | 0.19051  | -0.16268 | -0.26706 | -0.58399 | -1.19899 | -2.56608 | -2.83243 | -2.81589 | -3.25255 | -3.12298 |
| PFL1230w    | 1.07916  | 1.34274  | 1.24     | 1.71187  | 1.51746  | 1.36435  | 1.26426  | 1.55509  | 1.31969  | 1.02722  | 1.11756  | 0.73118  | 0.44416  | 0.13476  | -0.03639 | -0.33678 | -0.45861 | -0.6667  | -0.65502 | -0.40661 | 0.14812  | 0.38164  | 0.69559  | 1.00199  |
| PF14_0220   | 1.80445  | 1.10341  | 0.88958  | 1.34617  | 1.03829  | 0.98424  | 0.8044   | 0.73031  | -0.02534 | -0.04976 | 0.0413   | -0.02001 | -0.15077 | -0.24203 | -0.47917 | -0.49588 | -0.61505 | -0.1166  | 0.54779  | 0.66542  | 1.04133  | 1.07653  | 1.31122  | 1.71299  |
| PFA0300c    | -0.56658 | -0.19989 | -0.56859 | -0.20768 | -0.21214 | -0.13354 | -0.10993 | 0.21009  | 0.40636  | 0.26491  | 0.32842  | 0.58086  | 0.33563  | 0.27978  | 0.1493   | 0.1143   | -0.11899 | -0.34523 | 0.21917  | -0.19139 | -0.37022 | -0.45932 | -0.51942 | -0.45664 |
| PFL2255w    | -0.40245 | -0.47747 | -0.50163 | -0.54976 | -0.38914 | -0.42762 | -0.10358 | -0.62963 | -0.62224 | -0.38464 | -0.17189 | -0.03407 | 0.1131   | 0.18234  | 0.5019   | 0.66068  | 0.57259  | 0.48533  | 0.8366   | 0.42179  | 0.26595  | 0.02516  | -0.01657 | -0.04697 |
| PFI1415w    | -0.56088 | -0.72323 | -0.53741 | -0.41457 | -0.40861 | -0.52186 | -0.32575 | -0.08492 | 0.29288  | 0.51234  | 0.55491  | 0.52948  | 0.70511  | 0.49365  | 0.50212  | 0.30661  | 0.18185  | 0.16175  | -0.10802 | -0.17608 | -0.15445 | -0.25328 | 0.01539  | -0.01379 |
| PFB0925w    | 1.60987  | 1.76395  | 1.37773  | 1.11657  | 1.36946  | 0.87089  | 0.53025  | 0.26373  | -0.40333 | -0.89287 | -1.20191 | -1.46856 | -1.78544 | -2.01322 | -2.01189 | -2.12135 | -1.4503  | -1.49514 | 0.18713  | 1.27436  | 1.39555  | 1.18442  | 1.73463  | 1.76115  |
| PF14_0463   | -0.95958 | -1.04655 | -1.49144 | -1.4679  | -1.6011  | -1.63958 | -1.51368 | -1.40992 | -0.75527 | -0.4472  | -0.50574 | -0.21385 | 0.0588   | 0.531    | 0.53484  | 0.48252  | 0.8564   | 0.43487  | -0.34082 | 0.10099  | -0.00219 | -0.21966 | -0.56471 | -1.01227 |
| PF10_0085   | 0.85617  | 0.68255  | 0.78445  | 0.74823  | 0.66547  | 0.75662  | 0.67099  | 0.80216  | 0.4389   | 0.44573  | 0.4547   | 0.3629   | 0.07636  | -0.42328 | -0.64609 | -1.07369 | -1.5623  | -1.55839 | -0.92143 | -0.60012 | -0.15943 | 0.18877  | 0.33067  | 0.6902   |
| PFL0555c    | 0.44713  | 0.53511  | 0.18282  | 0.46551  | 0.4155   | 0.36432  | 0.33176  | 0.26882  | 0.33215  | 0.39413  | 0.32299  | 0.31812  | 0.3341   | 0.38186  | 0.28699  | -0.02529 | 0.00862  | -0.09603 | -0.68806 | -0.34261 | -0.31995 | -0.20957 | -0.14387 | 0.05639  |
| PFL1975c    | 0.50595  | 0.78946  | 0.32374  | -0.06239 | 0.28846  | 0.02155  | 0.1482   | 0.17671  | -0.47477 | 0.00365  | -0.40705 | -0.48967 | -0.3426  | -0.02861 | -0.45868 | -0.33038 | 0.10507  | 0.06105  | 0.00326  | -0.55566 | -0.29456 | -0.46469 | 0.00561  | -0.28711 |
| PFO8_0019   | -1.11668 | -0.26099 | 0.06061  | 0.41608  | 0.8081   | 0.68537  | 0.71446  | 0.42591  | 0.37157  | 0.53549  | 0.64801  | 0.55073  | 0.37805  | 0.22221  | 0.16505  | -0.18112 | -0.90613 | -0.8973  | -1.57215 | -2.14638 | -2.21515 | -1.85902 | -1.73593 | -1.26394 |
| PFI0585c    | -0.56879 | -0.66071 | -0.34799 | -0.50938 | -0.39284 | -0.33521 | -0.18247 | 0.01841  | 0.36256  | 0.57207  | 0.78046  | 0.95915  | 0.86181  | 0.74259  | 0.47986  | 0.19679  | 0.03519  | -0.0818  | -0.69293 | -0.37354 | -0.56987 | -0.72151 | -0.55488 | -0.58796 |
| MAL13P1.133 | -0.08001 | 0.02909  | -0.0974  | -0.00834 | 0.22733  | -0.13477 | 0.06119  | 0.18483  | 0.52298  | 0.71544  | 0.58146  | 0.60082  | 0.67537  | 0.84695  | 0.27004  | 0.10859  | 0.18879  | 0.18673  | -0.54091 | -0.0192  | -0.0896  | 0.15931  | -0.023   | -0.02738 |
| PFI0285w    | 0.41103  | 0.36085  | 0.72862  | 0.54714  | 0.47131  | 0.46929  | 0.45492  | 0.78462  | 0.83538  | 0.77229  | 0.57376  | 0.49167  | 0.5501   | 0.37398  | 0.0483   | -0.10325 | -0.22325 | -0.13579 | -0.47617 | -0.10004 | -0.07682 | -0.09894 | -0.06499 | 0.27355  |
| MAL8P1.45   | -0.40838 | -0.42093 | -0.61595 | -0.41138 | -0.26725 | -0.66729 | -0.72124 | -0.56262 | 0.55762  | 1.07606  | 1.25844  | 1.32702  | 0.95494  | 0.7836   | 0.41487  | 0.14832  | -0.09857 | -0.19958 | -0.31472 | -0.52288 | -0.61333 | -0.52369 | -0.63217 | -0.71256 |
| MAL8P1.104  | 0.33161  | 0.3741   | 0.25046  | 0.43738  | 0.45566  | 0.25996  | 0.1019   | -0.0805  | -0.14833 | -0.08212 | -0.24133 | -0.21778 | -0.21337 | -0.05433 | -0.20304 | -0.14063 | -0.11151 | -0.17879 | -0.88159 | -0.12112 | 0.02287  | 0.08366  | 0.36457  | 0.33828  |
| PFE1465w    | -0.77135 | -1.00981 | -1.04976 | -1.49926 | -1.70222 | -1.60225 | -1.61098 | -1.67972 | -1.27711 | -0.87658 | -0.7846  | -0.4635  | -0.17308 | 0.0881   | 0.3724   | 0.73442  | 0.80978  | 0.96045  | 0.41819  | 0.32307  | 0.24281  | 0.14738  | -0.20541 | -0.70293 |
| PFE0260w    | -0.31598 | -0.38194 | -0.49101 | -0.67542 | -0.67023 | -0.7895  | -0.70938 | -0.8095  | -0.51202 | -0.1665  | -0.03419 | 0.3324   | 0.45729  | 0.59536  | 0.69002  | 0.64609  | 0.5732   | 0.5704   | 0.50626  | 0.35087  | -0.34535 | -0.7297  | -0.81857 | -0.75418 |
| PFO8_0142   | -0.14387 | -0.07787 | 0.16511  | -0.0266  | 0.18707  | 0.00254  | -0.05872 | -0.15553 | -0.36681 | -0.70848 | -0.24508 | -0.29939 | -0.33742 | -0.05893 | 0.0453   | -0.20622 | 0.11944  | -0.50395 | -0.62842 | 0.04618  | 0.07395  | -0.69702 | -0.28314 | -0.56161 |
| PFA0465c    | -0.04166 | 0.05335  | -0.17967 | 0.76462  | 0.80419  | 1.07749  | 1.00686  | 1.05612  | 1.17436  | 0.83037  | 0.82895  | 0.71239  | 0.39733  | 0.35575  | 0.43064  | 0.34091  | -0.11125 | -0.0199  | 0.4942   | -0.12152 | -0.22563 | -0.19799 | -0.32208 | -0.30131 |
| PF13_0042   | -0.19853 | 0.39912  | 0.22271  | 0.55048  | 0.53402  | 0.73424  | 0.70738  | 0.85971  | 0.95476  | 0.81061  | 0.69835  | 0.75718  | 0.69419  | 0.33552  | 0.27209  | -0.14688 | -0.04258 | -0.58638 | -0.76265 | -1.02008 | -0.73376 | -0.50824 | -0.51552 | -0.31415 |
| PF14_0546   | -0.19449 | 0.27629  | 0.19071  | 0.36551  | 0.3767   | 0.18122  | 0.14851  | 0.23186  | 0.31334  | 0.52986  | 0.6584   | 0.73562  | 0.7241   | 0.41334  | 0.21988  | -0.18583 | -0.76367 | -1.14246 | -1.5658  | -1.442   |          |          |          |          |

|             |          |          |          |          |          |          |          |          |          |          |          |          |          |          |          |          |          |          |          |          |          |          |          |          |
|-------------|----------|----------|----------|----------|----------|----------|----------|----------|----------|----------|----------|----------|----------|----------|----------|----------|----------|----------|----------|----------|----------|----------|----------|----------|
| PF13_0343   | 0.77001  | 0.90762  | 0.69641  | 0.90288  | 0.89057  | 0.73265  | 0.72137  | 0.70237  | 0.6345   | 0.50375  | 0.53975  | 0.38169  | 0.27955  | 0.20829  | 0.20296  | 0.03374  | -0.10001 | -0.26177 | -0.13616 | -0.08425 | 0.03231  | 0.28049  | 0.44071  | 0.71011  |
| PFD0195c    | 0.79109  | 0.22654  | -0.02407 | -0.27724 | -0.10099 | -0.6384  | -0.82268 | -1.02546 | -1.6082  | -1.81261 | -1.88206 | -2.01888 | -2.02703 | -1.90979 | -1.65593 | -1.06057 | 0.17446  | -0.04289 | 1.68568  | 1.24172  | 1.46046  | 0.86425  | 1.15441  | 1.39802  |
| PFL1535w    | -0.06727 | 0.30508  | 0.33009  | 0.71493  | 0.8355   | 0.75176  | 0.79042  | 0.94426  | 0.78942  | 0.89687  | 0.91612  | 0.81938  | 0.29416  | 0.14493  | -0.01202 | -0.085   | -0.20591 | -0.05146 | -0.15309 | -0.1498  | -0.42019 | -0.39506 | -0.27429 | -0.10093 |
| PFL0360c    | -0.34615 | -0.35662 | -1.08053 | -0.45472 | -0.39785 | -0.55866 | -0.48536 | -0.5954  | -0.35452 | -0.15987 | -0.07538 | 0.17373  | 0.32461  | 0.64753  | 0.35608  | 0.54451  | 0.36861  | 0.69053  | -0.01133 | 0.3697   | 0.28068  | 0.27566  | 0.06256  | -0.03925 |
| PFF1100c    | 0.68616  | 0.88883  | 1.20823  | 0.87847  | 0.85941  | 0.60795  | 0.4756   | 0.27781  | -0.33202 | -0.2681  | -0.62803 | -0.81758 | -0.75951 | -0.83933 | -1.08014 | -1.22315 | -0.91932 | -1.11726 | -0.37411 | 0.11761  | 0.40999  | 0.65442  | 0.82905  | 0.92411  |
| MAL7P1.115  | -0.1388  | -0.16992 | -0.20718 | -0.18977 | -0.10476 | -0.25474 | -0.23143 | -0.34533 | -0.49196 | -0.47706 | -0.19427 | 0.12325  | 0.35077  | 0.67898  | 0.80131  | 0.71518  | 0.54853  | 0.61201  | 0.20259  | 0.40332  | 0.13211  | -0.08011 | -0.09332 | 0.04564  |
| PF13_0022   | -0.13031 | -0.68109 | -0.28234 | -0.43085 | -0.34668 | -0.27146 | 0.1937   | 0.19989  | 0.56752  | 0.62655  | 0.63191  | 0.79438  | 0.65036  | 0.63123  | 0.49385  | 0.53539  | 0.17674  | 0.43524  | 0.73831  | 0.33784  | 0.11359  | 0.04863  | 0.13965  | 0.27732  |
| PF11_0378   | 0.58184  | 0.59875  | 0.76617  | 0.72315  | 0.7574   | 0.53316  | 0.47599  | 0.6625   | 0.51219  | 0.56368  | 0.38676  | 0.1951   | -0.00282 | -0.37404 | -0.79853 | -1.26198 | -1.16105 | -1.25218 | -0.94957 | -0.33565 | 0.05772  | 0.11217  | 0.44513  | 0.69743  |
| PF10_0303   | 0.3578   | 0.81158  | 0.15409  | 0.14483  | -0.18128 | 0.03661  | -0.21393 | 0.52817  | 0.28399  | -0.64472 | -0.33403 | -0.53096 | -0.45873 | -0.82587 | 0.01978  | 0.14771  | -0.17115 | 0.34806  | 0.36295  | -0.17284 | 0.35311  | 0.89395  | 0.54041  | 0.29435  |
| PF11_0125   | -0.17561 | -0.08338 | -0.06022 | -0.22859 | -0.42482 | -0.62867 | -0.32274 | -0.42808 | -0.00077 | 0.2919   | 0.4419   | 0.52158  | 0.46385  | 0.42573  | 0.22681  | 0.34108  | 0.27958  | 0.26534  | 0.77175  | 0.48807  | 0.38438  | 0.13952  | 0.18848  | 0.05134  |
| PF14_0553   | 0.71876  | 0.77137  | 0.59344  | 0.78507  | 0.80112  | 0.62323  | 0.56523  | 0.65757  | 0.15114  | 0.13647  | -0.09492 | -0.35165 | -0.4509  | -0.66774 | -0.68446 | -0.83986 | -0.82909 | -1.01556 | -0.02103 | 0.0929   | 0.33457  | 0.4982   | 0.71341  | 0.94777  |
| PF14_0569   | 0.17248  | 0.14102  | 0.49706  | 0.46082  | 0.25075  | 0.23514  | 0.065    | 0.01959  | 0.05191  | 0.06559  | 0.14139  | 0.26334  | 0.35108  | 0.33209  | 0.49938  | 0.33004  | 0.04417  | -0.08905 | 0.06266  | -0.30437 | -0.28433 | -0.11049 | -0.07387 | 0.06639  |
| MAL8P1.26   | -0.53685 | -0.37981 | -0.40401 | -0.40187 | -0.16689 | 0.04124  | 0.16455  | 0.3415   | 0.14832  | 0.1312   | 0.48125  | 0.48139  | 0.5281   | 0.32375  | 0.51147  | 0.54261  | 0.47408  | 0.07829  | 0.12352  | -0.03371 | -0.05155 | -0.20788 | -0.22331 | -0.18792 |
| PF11_0187   | -0.30196 | -0.12994 | 0.09051  | 0.18613  | 0.29364  | 0.50892  | 0.4418   | 0.28372  | 0.10494  | -0.04526 | 0.17546  | 0.25798  | 0.22759  | 0.18412  | 0.44335  | 0.4179   | -0.00629 | 0.11048  | -0.08578 | -0.32085 | -0.38951 | -0.33436 | -0.18437 |          |
| PF14_0472   | -0.07415 | -0.1457  | -0.30101 | -0.20076 | -0.33302 | -0.80459 | -0.75854 | -0.47655 | -1.0161  | -1.37595 | -1.45069 | -1.68291 | -1.70528 | -1.67749 | -0.53662 | 0.34561  | 0.88988  | 0.56572  | 1.41679  | 0.92285  | 0.95231  | 0.52205  | 0.48953  | 0.23635  |
| PFF0735w    | 0.46079  | 0.78332  | 1.00898  | 1.11195  | 0.84636  | 1.03852  | 1.07858  | 0.51782  | 0.37611  | 0.05535  | -0.09998 | -0.06397 | 0.11691  | 0.09332  | 0.29733  | 0.3241   | 0.45889  | 0.57688  | 0.77922  | 0.45469  | 0.43854  | 0.57606  | 0.62943  | 0.68112  |
| PF14_0403   | -1.28415 | -0.87786 | 0.2241   | -0.53837 | -0.24321 | 0.49714  | 0.71324  | 0.87291  | 1.14163  | 1.16825  | 1.19529  | 1.06997  | 1.11905  | 0.8256   | 0.52443  | 0.17851  | -0.01543 | -0.23004 | -0.44172 | -0.95567 | -1.13664 | -1.00849 | -1.13521 | -1.08202 |
| PFE0345c    | -0.76741 | -0.51532 | -2.34552 | -0.42899 | -0.41905 | -0.36093 | -0.43273 | -0.17879 | 0.09183  | 0.21056  | 0.46552  | 0.58102  | 0.61527  | 0.30254  | 0.67936  | 0.49499  | 0.36984  | 0.18449  | 0.12978  | -0.32958 | -0.57393 | -0.53148 | -0.60378 | -0.60372 |
| PFE0970w    | -0.05227 | 0.16982  | -0.08433 | 0.10951  | -0.12223 | -0.0904  | -0.18185 | -0.07797 | -0.2163  | -0.03865 | 0.22658  | 0.42484  | 0.63409  | 0.6208   | 0.62268  | 0.59555  | 0.36315  | 0.3438   | 0.13736  | -0.11137 | -0.34578 | -0.39783 | -0.23284 | -0.17691 |
| PFF0965c    | -0.34589 | -0.3586  | -0.21406 | -0.29642 | -0.26472 | 0.10074  | 0.11158  | -0.06887 | 0.18783  | 0.17394  | 0.17754  | 0.39573  | 0.48885  | 0.56661  | 0.40898  | 0.22317  | 0.14805  | -0.07163 | -0.3569  | -0.10006 | -0.21545 | -0.18887 | -0.20512 | -0.07678 |
| PFE1090w    | -0.20891 | -0.05338 | -0.12606 | 0.02441  | -0.00193 | -0.02073 | -0.03177 | 0.04701  | -0.0328  | 0.11993  | 0.18674  | 0.17705  | 0.30399  | 0.15191  | 0.35374  | 0.2821   | 0.30758  | 0.12737  | 0.27186  | 0.07937  | 0.05991  | 0.03731  | -0.03997 | -0.00651 |
| PFL1940w    | 1.14377  | 1.22322  | 1.26815  | 1.35901  | 1.35327  | 1.2402   | 0.96793  | 0.83291  | 0.60361  | 0.17865  | 0.01264  | -0.11623 | -0.07863 | -0.07224 | -0.01681 | -0.06553 | -0.10027 | 0.1259   | 0.22266  | 0.32882  | 0.47448  | 0.54172  | 0.68663  | 0.75286  |
| MAL13P1.94  | 0.62854  | 0.06882  | -0.18266 | -0.46246 | -0.85955 | -1.08628 | -1.33426 | -1.66761 | -2.09064 | -2.57405 | -2.74753 | -2.77531 | -2.68325 | -2.49858 | -1.00548 | 0.2852   | 0.79357  | 0.72087  | 1.54815  | 1.11904  | 1.00746  | 0.70186  | 0.85611  | 0.31822  |
| PFF0875w    | -0.05114 | -0.40812 | -0.67498 | -0.7438  | -0.91023 | -1.05725 | -1.13396 | -0.89498 | -0.87682 | -0.66929 | -0.52281 | -0.33385 | -0.28382 | -0.54095 | -0.50733 | -0.45519 | -0.21635 | 0.13908  | 0.80966  | 0.75632  | 0.73053  | 0.38402  | 0.52037  | 0.2095   |
| PF10_0131   | 1.13065  | 0.68778  | 0.38176  | 0.34723  | 0.24338  | -0.21139 | -0.3422  | -0.54412 | -0.7822  | -0.5682  | -0.35632 | -0.2372  | -0.26465 | -0.19657 | 0.31425  | -0.33612 | -0.40211 | 0.15635  | 0.93899  | 0.96715  | 1.33488  | 1.26669  | 1.25849  | 1.3282   |
| PF11_0203   | 0.00437  | 0.15388  | 0.37742  | 0.72441  | 0.84013  | 1.03026  | 1.02989  | 1.15564  | 1.25772  | 0.99181  | 0.98666  | 0.77979  | 0.82291  | 0.61838  | 0.3425   | 0.13064  | 0.04543  | -0.22213 | -0.44654 | -0.73514 | -0.78778 | -0.79372 | -0.79142 | -0.54487 |
| PF07_0043   | -0.7561  | 0.11228  | 0.33183  | 0.26575  | 0.12324  | 0.44579  | 0.23318  | 0.30317  | 0.54864  | 0.49256  | 0.60961  | 0.58706  | 0.23624  | 0.14531  | 0.22694  | -0.08028 | -0.65802 | -0.59046 | -0.84692 | -1.51334 | -1.63983 | -0.99242 | -0.98312 | -0.80846 |
| PFC0140c    | -0.10529 | 0.04849  | 0.26752  | 0.29109  | 0.35339  | 0.46423  | 0.46791  | 0.41802  | 0.36245  | 0.29315  | 0.28472  | 0.36783  | 0.51405  | 0.43977  | 0.48186  | 0.37909  | 0.46331  | 0.12937  | 0.37894  | 0.19786  | 0.08601  | -0.1002  | -0.05184 | -0.0907  |
| PF11_0231   | 1.50129  | 1.42939  | 1.40692  | 1.60496  | 1.50318  | 1.34562  | 1.01503  | 0.73058  | 0.66992  | -0.45767 | -0.8506  | -0.93697 | -1.0518  | -1.15284 | -0.85991 | -0.53978 | -0.15363 | -0.29609 | 0.7236   | 0.4544   | 0.68516  | 0.9179   | 1.16495  | 1.21268  |
| MAL13P1.238 | 1.43682  | 0.88393  | 0.82398  | 0.23899  | 0.0587   | -0.47824 | -0.71508 | -0.76008 | -0.69372 | -0.40193 | -0.05075 | 0.38097  | 0.43605  | 0.33115  | 0.20969  | 0.32606  | 0.26027  | 0.2857   | 0.48778  | 0.45109  | 0.32147  | 0.19153  | 0.41923  | 0.59849  |
| PFL1305c    | -0.70076 | -0.8665  | -1.05138 | -0.88164 | -0.82387 | -0.97767 | -1.13022 | -0.78619 | -0.90924 | -0.60789 | -0.41514 | -0.09842 | 0.06638  | 0.15203  | 0.4782   | 0.54032  | 0.72238  | 0.52651  | 0.70059  | 0.47854  | 0.29026  | -0.18057 | -0.36597 | -0.47362 |
| PF14_0449   | 0.15971  | 0.38949  | 0.52836  | 0.65906  | 0.66019  | 0.68041  | 0.76349  | 0.72558  | 0.54818  | 0.46818  | 0.39506  | 0.22824  | 0.30423  | -0.01006 | 0.24525  | 0.03027  | -0.06962 | -0.49164 | -0.40839 | -0.68243 | -0.5885  | -0.34775 | -0.20256 | 0.29538  |
| PFA0115w    | -2.06359 | -2.13715 | -2.3316  | -2.8732  | -2.59982 | -2.9477  | -2.93177 | -2.24933 | -1.3107  | -0.22106 | 0.66477  | 1.02647  | 1.23685  | 1.02551  | 0.96048  | 0.53523  | 0.054    | -0.18082 | -0.47519 | -1.16962 | -1.62431 | -1.89185 | -2.00037 | -2.02243 |
| PFC1035w    | -0.6537  | -0.76368 | -0.49614 | -0.78135 | -0.80023 | -0.85155 | -0.67351 | -0.5265  | -0.2569  | 0.01422  | 0.4261   | 0.52354  | 0.6299   | 0.57373  | 0.61436  | 0.50289  | 0.20712  | 0.08446  | -0.11698 | -0.43327 | -0.58733 | -0.94007 | -0.93572 | -0.86163 |
| PFL1285c    | 0.01526  | -0.36674 | -0.94653 | -0.5863  | -0.64315 | -0.79051 | -0.84567 | -0.64045 | -0.23291 | 0.09473  | 0.51722  | 0.71597  | 0.40041  | 0.39314  | 0.36782  | 0.53002  | -0.11574 | 0.63339  | 0.62632  | 0.37191  | 0.00609  | -0.17311 | -0.25064 | -0.4342  |
| MAL8P1.154  | 0.65935  | 0.54982  | 0.69673  | 1.31512  | 1.46816  | 1.4807   | 1.41672  | 1.10445  | 1.08449  | 0.76813  | 0.23657  | 0.03     | -0.01643 | 0.09843  | -0.37751 | -0.48923 | -0.33161 | -0.19477 | -0.52464 | 0.27845  | 0.4001   | 0.71756  | 0.81041  | 0.84709  |
| PF10_0308   | 0.52785  | 0.05478  | -0.34641 | -0.32485 | -0.52086 | -0.71054 | -1.19446 | -1.03284 | -1.42189 | -1.82968 | -1.99335 | -1.77601 | -1.9767  | -1.95879 | -1.32515 | -0.46103 | 0.26593  | 0.76918  | 1.37146  | 1.25425  | 1.2244   | 1.10651  | 1.15871  | 0.84675  |
| MAL13P1.165 | -0.68731 | -1.18019 | -1.68896 | -0.50233 | -0.42096 | -0.54452 | -0.58962 | -0.40293 | -0.45243 | -0.32947 | -0.16564 | -0.11433 | 0.03529  | 0.18272  | 0.24577  | 0.35113  | 0.31551  | 0.24411  | 0.03693  | -0.00833 | -0.23548 | -0.4216  | -0.46013 | -0.45185 |
| PF11730w    | -0.49648 | -1.32688 | -1.49774 | -1.85365 | -2.10128 | -2.52355 | -2.55008 | -2.81318 | -3.01379 | -3.23487 | -3.3528  | -3.287   | -2.65698 | -1.19555 | -0.01691 | 0.96815  | 1.21918  | 1.39375  | 1.17784  | 1.19183  | 0.75     | 0.26381  | -0.08351 | -0.84112 |
| PF11_0445   | 0.05609  | 0.45308  | 0.51112  | 0.37483  | 0.51862  | 0.52929  | 0.71918  | 0.99221  | 0.97495  | 0.8561   | 0.66901  | 0.51202  | 0.21894  | -0.18629 | -0.52228 | -0.60743 | -1.11004 | -0.68413 | -0.95125 | -0.83993 | -0.59835 | -0.37234 | -0.20224 | 0.04484  |
| PFL1150c    | -1.01091 | -0.97097 | -0.93216 | -1.07728 | -0.88172 | -0.73934 | -0.24633 | -0.24369 | 0.29656  | 0.4366   | 0.99369  | 1.21011  | 1.23361  | 0.85762  | 0.77169  | 0.51315  | 0.17847  | -0.08272 | -0.16301 |          |          |          |          |          |

|             |          |          |          |          |          |          |          |          |          |          |          |          |          |          |          |          |          |          |          |          |          |          |          |          |
|-------------|----------|----------|----------|----------|----------|----------|----------|----------|----------|----------|----------|----------|----------|----------|----------|----------|----------|----------|----------|----------|----------|----------|----------|----------|
| MAL13P1.253 | -0.17865 | 0.36509  | 0.31186  | 0.43554  | 0.46033  | 0.44742  | 0.42557  | 0.41739  | 0.34035  | 0.34052  | 0.60799  | 0.57578  | 0.58824  | 0.29371  | 0.43771  | 0.23818  | -0.33549 | -0.30289 | -0.24332 | -0.87031 | -0.69019 | -0.47281 | -0.56508 | -0.17723 |
| PF13 0271   | 0.26336  | 0.44041  | -0.10276 | 0.37726  | 0.55567  | 0.80943  | 0.93826  | 0.93308  | 1.02827  | 0.92125  | 0.63154  | 0.27794  | -0.03644 | -0.45026 | -0.59324 | -0.60794 | -0.08871 | -0.42676 | 0.8825   | 0.55393  | 0.53279  | 0.5248   | 0.75445  | 0.65755  |
| PF14 0041   | 0.25934  | 0.50252  | 0.56291  | 0.64038  | 0.57264  | 0.70942  | 0.54968  | 0.5796   | 0.33146  | 0.29829  | 0.21958  | 0.34216  | 0.32895  | 0.43465  | 0.47321  | 0.41614  | 0.40182  | 0.49465  | 0.27067  | 0.48999  | 0.37295  | 0.32366  | 0.37737  | 0.20817  |
| PF14 0490   | 0.10935  | 0.64113  | 0.87501  | 0.90346  | 0.62532  | 0.91671  | 0.4673   | 0.09434  | 0.72949  | 0.51052  | 0.43288  | 0.51881  | 0.64226  | 0.31438  | 0.49264  | 0.33423  | 0.09794  | -0.14141 | -0.05875 | -0.52125 | -0.4073  | -0.34439 | -0.11049 | 0.16581  |
| MAL7P1.207  | -0.15992 | -0.34854 | -0.65903 | -0.76238 | -0.79416 | -0.95236 | -0.80846 | -0.89952 | -0.58925 | -0.57788 | -0.40144 | -0.34956 | -0.12972 | 0.2086   | 0.35029  | 0.50176  | 0.54299  | 0.70471  | 0.52401  | 0.74795  | 0.61805  | 0.2265   | 0.0296   | -0.43317 |
| PF0205w     | -1.1127  | -1.34191 | -1.38454 | -1.2423  | -1.37095 | -1.00492 | -0.52424 | 0.01893  | 0.80903  | 0.79856  | 0.88868  | 0.88224  | 0.95505  | 0.65491  | 0.45673  | 0.3374   | 0.1721   | 0.16605  | 0.09862  | -0.3851  | -0.54921 | -0.4255  | -0.5988  | -0.68438 |
| PF14 0491   | -0.30251 | -0.54736 | 0.03192  | -0.11587 | -0.00084 | 0.02204  | 0.06475  | -0.09353 | -0.04041 | 0.34546  | 0.12951  | 0.08468  | 0.08096  | 0.00048  | -0.22936 | 0.00147  | -0.01399 | 0.2612   | 0.13507  | 0.23981  | 0.44437  | 0.29186  | 0.35772  | 0.31355  |
| PF14 0520   | -0.95849 | -0.39053 | -0.3303  | -0.24136 | -0.21425 | -0.0221  | -0.19292 | -0.23849 | -0.27322 | -0.10961 | 0.16467  | 0.37821  | 0.72629  | 0.53673  | 0.86055  | 0.63913  | -0.14219 | 0.06744  | -0.37084 | -0.95101 | -1.22474 | -1.11428 | -1.23485 | -1.14309 |
| PF0945w     | 0.32779  | -0.02594 | -0.42202 | -0.5309  | -0.82062 | -0.82873 | -0.9586  | -1.06348 | -1.37455 | -1.72485 | -1.93247 | -1.94439 | -1.98779 | -2.0592  | -1.23554 | -0.20998 | 0.36853  | 0.34362  | 1.54797  | 0.94071  | 0.89881  | 0.79341  | 0.91185  | 0.59138  |
| PF13 0183   | -0.29136 | -0.46956 | -0.03815 | -0.40486 | -0.52609 | -0.27943 | -0.24291 | 0.22136  | 0.64193  | 0.82619  | 1.08219  | 0.99159  | 1.08674  | 0.6873   | 0.55017  | 0.31418  | -0.00604 | -0.10712 | -0.37991 | -0.7322  | -0.67812 | -0.77277 | -0.81674 | -0.75677 |
| PF14 0228   | -0.48858 | -0.14106 | 0.19456  | 0.1122   | 0.26018  | 0.34496  | 0.43181  | 0.42315  | 0.42744  | 0.4707   | 0.41509  | 0.41548  | 0.44177  | 0.45231  | 0.11637  | -0.20901 | -0.35353 | -0.54602 | -1.2827  | -1.0653  | -0.93434 | -0.75104 | -0.72522 | -0.47556 |
| PF10 0129   | -0.07129 | -0.30178 | 0.12009  | -0.28795 | -0.21469 | -0.17351 | -0.01985 | 0.12531  | 0.17296  | 0.26788  | 0.24976  | 0.1874   | 0.05404  | -0.04909 | -0.22214 | 0.02451  | 0.32191  | 0.15342  | 0.66874  | 0.6351   | 0.44826  | 0.53692  | 0.53332  | 0.39764  |
| MAL13P1.395 | 0.63307  | 0.50255  | 0.71605  | 1.09693  | 1.07263  | 1.01339  | 0.83919  | 0.82835  | 0.5303   | 0.4281   | 0.15663  | 0.0049   | -0.26251 | -0.46844 | -0.61212 | -0.74105 | -0.65505 | -0.7013  | 1.1572   | 0.62643  | 0.70515  | 0.68914  | 1.05656  | 1.27017  |
| PF11 0060   | 0.27124  | -0.38359 | -0.46645 | -1.08744 | -1.24897 | -1.64396 | -1.84689 | -2.04013 | -2.43002 | -2.51049 | -2.57449 | -2.93529 | -3.05543 | -2.84327 | -2.77473 | -1.77295 | -2.24189 | -0.00992 | 0.85522  | 1.0165   | 1.00287  | 0.86033  | 0.91423  | 0.8015   |
| PFE1110w    | -0.67047 | -0.22209 | 0.06959  | -0.0375  | -0.11166 | -0.27871 | -0.30369 | -0.104   | -0.40108 | -0.20748 | -0.00577 | 0.01672  | -0.08441 | -0.18697 | 0.01781  | -0.0982  | -0.24107 | -0.35974 | -0.24053 | -0.59572 | -0.54035 | -0.7445  | -0.65766 | -0.42031 |
| PF11 0111   | 0.02948  | 0.34898  | 0.38741  | 0.50378  | 0.31201  | 0.32312  | 0.17679  | -0.02453 | 0.45272  | 0.40406  | 0.23582  | 0.36616  | 0.42106  | 0.34905  | 0.06085  | -0.27877 | -0.56774 | -0.73741 | -1.4769  | -0.99859 | -0.6332  | -0.46051 | -0.20588 | -0.23668 |
| PFD0144c    | 1.86868  | 2.10431  | 1.12981  | 1.55254  | 1.51198  | 0.74314  | 0.34647  | 0.39968  | -0.34614 | -0.77275 | -0.56769 | -0.85723 | -1.04458 | -1.28735 | -1.36414 | -1.47043 | -1.47989 | -1.14013 | 0.57811  | 1.2318   | 1.62311  | 1.09779  | 1.79049  | 1.99035  |
| PF11 0398   | 1.36447  | 1.33254  | 1.10143  | 1.10737  | 1.11812  | 0.63709  | 0.52888  | 0.3532   | -0.22575 | -0.38679 | -0.85562 | -1.09531 | -1.29141 | -1.30048 | -1.51955 | -1.80943 | -1.52631 | -1.28236 | -0.15413 | 0.56347  | 0.96592  | 1.05916  | 1.31048  | 1.25641  |
| PF11 0268   | 1.11498  | -0.02813 | -0.63989 | -0.47945 | -0.65167 | -1.12966 | -1.64787 | -1.98698 | -2.6503  | -3.26371 | -3.22331 | -3.4944  | -3.64269 | -3.54326 | -3.38761 | -3.00962 | -1.77469 | -1.04388 | 1.47404  | 1.2221   | 1.32271  | 1.10972  | 1.31777  | 1.66257  |
| MAL7P1.320  | -0.81013 | -0.11781 | -0.0851  | 0.21134  | 0.25957  | 0.2566   | 0.43033  | 0.60373  | 0.37385  | 0.2929   | 0.48681  | 0.6058   | 0.42565  | 0.19963  | 0.09208  | -0.28616 | -1.03114 | -0.77827 | -1.21494 | -1.58302 | -1.73224 | -1.48995 | -1.37434 | -1.0011  |
| PF07 0026   | 0.03184  | -0.22812 | -0.10655 | -0.00394 | -0.08    | -0.0639  | -0.11973 | -0.11285 | -0.06695 | -0.15939 | -0.16023 | 0.04541  | -0.26057 | -0.44483 | -0.55211 | -0.51275 | -0.41421 | -0.28473 | 0.40989  | 0.21215  | 0.30868  | 0.19737  | 0.39117  | 0.43102  |
| MAL8P1.66   | 1.47822  | 0.86216  | 0.45852  | 0.36095  | 0.46784  | -0.20495 | -0.43059 | -0.65696 | -1.18163 | -1.00384 | -0.76317 | -0.56536 | -0.61306 | -0.5797  | -0.41407 | -0.51847 | -0.72216 | -0.38702 | 1.41551  | 1.13063  | 1.34359  | 1.14486  | 1.43114  | 1.78816  |
| PFA0260c    | -0.75355 | -0.94061 | -1.01676 | -1.61628 | -1.5812  | -1.96234 | -2.23905 | -2.30808 | -2.83976 | -2.94617 | -2.63249 | -2.47112 | -1.86904 | -1.50428 | -0.11033 | 0.5421   | 0.92764  | 0.3722   | 1.15578  | 0.60287  | 0.66925  | -0.12201 | 0.00638  | -0.32511 |
| PFD0245c    | 0.21376  | 0.60464  | 0.92426  | 0.93323  | 0.75971  | 0.85124  | 0.70884  | 0.81283  | 0.85293  | 0.71383  | 0.63892  | 0.51595  | 0.2782   | -0.30291 | -0.25743 | -0.41835 | -0.53815 | -0.58749 | -0.35189 | -0.75955 | -0.59395 | -0.16505 | 0.03435  | 0.19358  |
| PFE0665c    | -0.27677 | -0.44795 | 0.06202  | -0.08049 | 0.3227   | 0.67758  | 0.81848  | 0.82636  | 0.87435  | 0.69747  | 1.00457  | 0.83914  | 0.79031  | 0.50977  | 0.39256  | 0.32618  | -0.04964 | 0        | -0.02395 | -0.20717 | -0.35891 | -0.38644 | -0.29315 | 0.00574  |
| PFD0450c    | 0.34258  | 0.59549  | 0.42513  | 0.556    | 0.47838  | 0.31311  | 0.36879  | 0.59562  | 0.43468  | 0.54144  | 0.49638  | 0.36697  | 0.11492  | 0.02916  | -0.00371 | -0.18439 | -0.4072  | -0.52458 | -0.12079 | -0.15976 | 0.00958  | 0.0898   | 0.25908  | 0.52202  |
| PF11 0339   | -1.3816  | -1.51379 | -0.88404 | -1.36847 | -1.23155 | -1.05713 | -1.03342 | -0.78015 | -0.62836 | -0.10629 | 0.3413   | 0.54769  | 0.61212  | 0.61101  | 0.975    | 0.9209   | 0.47155  | 0.30102  | -0.19609 | -0.79986 | -0.75379 | -1.1914  | -1.5023  | -1.70126 |
| PF13 0117   | 0.08128  | -0.01148 | 0.08573  | 0.04998  | 0.1358   | -0.016   | 0.05328  | 0.27645  | 0.387    | 0.46669  | 0.35339  | 0.42605  | 0.40645  | 0.36022  | 0.47109  | 0.42695  | 0.26236  | 0.39957  | 0.4351   | 0.32285  | 0.1767   | -0.07822 | 0.01615  | 0.06224  |
| PF14 0036   | -1.36685 | -1.30602 | -0.7524  | -0.80403 | -0.55326 | 0.12593  | 0.54877  | 0.9716   | 0.86411  | 0.87625  | 1.03441  | 0.90084  | 0.80441  | 0.41796  | 0.35451  | 0.03627  | -0.3668  | -0.56481 | -0.4216  | -0.91042 | -0.9699  | -1.0622  | -1.02988 | -0.74774 |
| PF11130c    | 0.35625  | 0.41882  | 0.23666  | 0.80616  | 0.8691   | 1.10548  | 0.81388  | 0.75191  | 0.58003  | 0.26806  | 0.42279  | 0.43711  | 0.35608  | 0.41318  | 0.46201  | 0.52317  | 0.17395  | 0.438    | 0.78858  | 0.32523  | 0.21289  | 0.0108   | 0.07504  | 0        |
| PF10 0232   | -0.05794 | -0.28214 | -0.31837 | -0.57628 | -0.90767 | -0.74871 | -0.71942 | -1.06735 | -0.5835  | -0.34634 | -0.37705 | -0.23793 | 0.00387  | 0.19283  | -0.00179 | -0.02726 | 0.29298  | 0.31021  | -0.45986 | 0.24314  | 0.26931  | 0.20001  | 0.24226  | -0.0575  |
| PF10 0147   | 0.22056  | -0.04299 | -0.31378 | -0.17537 | -0.26413 | -0.33088 | -0.16874 | -0.20619 | -0.2873  | -0.09222 | 0.05959  | -0.03024 | -0.38292 | -0.16606 | 0.06646  | 0.38532  | 0.53308  | 0.63554  | 0.74119  | 0.66646  | 0.67126  | 0.44342  | 0.204    | -0.10335 |
| PFL0245w    | 0.58688  | -0.14486 | -0.1918  | -0.72058 | -0.59465 | -1.14967 | -1.15288 | -1.56461 | -1.8874  | -2.20653 | -2.32243 | -2.5049  | -2.60593 | -2.79913 | -2.28781 | -2.28483 | -1.19177 | -0.68931 | 1.95226  | 1.04845  | 1.06753  | 0.98954  | 1.11769  | 1.47748  |
| PFB0805c    | 0.03874  | 0.29     | 0.24648  | 0.23261  | 0.19118  | -0.02303 | -0.08899 | 0.05365  | -0.4528  | -0.5708  | -0.36183 | -0.67405 | -0.83246 | -1.11721 | -0.48482 | -0.13019 | 0.35424  | -0.27966 | 0.88258  | 0.24158  | 0.11098  | 0.12752  | 0.28706  | 0.29495  |
| PFL1755w    | 0.0123   | -0.05306 | -0.06938 | -0.15451 | -0.08048 | -0.06345 | -0.05971 | 0.02878  | -0.04945 | 0.11581  | 0.17476  | 0.29388  | 0.16394  | 0.28292  | 0.56889  | 0.67892  | 0.58074  | 0.61059  | 1.11813  | 0.80552  | 0.63582  | 0.58563  | 0.61707  | 0.66929  |
| MAL13P1.268 | 2.67165  | 2.38702  | 1.86968  | 1.96666  | 1.59888  | 1.20277  | 0.73999  | 0.34115  | -0.17415 | -0.41087 | -0.45385 | -0.43546 | -0.60868 | -0.71372 | -0.67785 | -0.83624 | -0.65699 | -0.78855 | -0.51869 | -0.1807  | 0.822    | 1.43029  | 1.51377  | 1.65903  |
| PFL0330c    | 0.68284  | 1.07915  | 1.00292  | 1.19947  | 1.17355  | 1.20717  | 1.18771  | 1.23877  | 1.12443  | 0.97974  | 0.81221  | 0.67172  | 0.45785  | -0.02235 | -0.26877 | -0.7108  | -0.6736  | -0.98874 | -1.26773 | -1.32521 | -0.77541 | -0.10686 | 0.04609  | 0.25547  |
| PFI0915w    | 1.63595  | 1.19135  | 0.80187  | 0.6847   | 0.4046   | -0.13513 | -0.49994 | -0.90199 | -1.57906 | -1.88949 | -2.08187 | -2.31451 | -2.5471  | -2.54534 | -2.52048 | -2.57034 | -3.09926 | -1.37774 | 0.68339  | 1.06368  | 1.31922  | 1.41075  | 1.50747  | 1.75975  |
| PF14 0006   | 0.69689  | 0.38872  | 0.08491  | 0.23287  | 0.49058  | 0.32638  | 0.22191  | 0.18413  | 0.03889  | -0.05527 | -0.41623 | -0.56423 | -0.43491 | -0.30307 | -0.32105 | 0.04035  | 0.31341  | 0.54396  | 0.50597  | 0.80261  | 0.81459  | 0.72745  | 0.63112  | 0.50843  |
| MAL13P1.72  | -0.89592 | -0.95717 | -0.92318 | -0.84723 | -0.76634 | -0.83386 | -0.54461 | -0.31626 | 0.18985  | 0.40874  | 0.60361  | 0.5838   | 0.75954  | 0.75839  | 0.6275   | 0.49184  | 0.35235  | 0.11095  | -0.10562 | -0.3416  | -0.45071 | -0.42117 | -0.57826 | -0.5698  |
| MAL13P1.330 | 0.82063  | 0.42713  | 0.02839  | 0.20944  | 0.01732  | -0.02573 | -0.27355 | -0.28738 | -0.39821 | -0.5031  | -0.38952 | -0.53502 | -0.7566  | -0.64104 | -0.56268 | -0.24994 | -0.33449 | 0.39689  | 0.72007  | 0.68883  | 0.62     |          |          |          |



|             |          |          |          |          |          |          |          |          |          |          |          |          |          |          |          |          |          |          |          |          |          |          |          |          |
|-------------|----------|----------|----------|----------|----------|----------|----------|----------|----------|----------|----------|----------|----------|----------|----------|----------|----------|----------|----------|----------|----------|----------|----------|----------|
| PFL2155w    | -0.21025 | -0.07837 | 0.06197  | 0.28794  | 0.27242  | 0.30055  | -0.0365  | 0.15742  | 0.09742  | 0.0066   | 0.33359  | 0.39215  | 0.31556  | 0.27447  | 0.02482  | 0.02312  | -0.13728 | -0.43762 | -0.07176 | -0.15284 | -0.15977 | 0.00219  | 0.39772  | 0.50272  |
| PF08_0004   | -0.19617 | 0.26723  | 0.63343  | 0.3258   | 0.37514  | 0.45222  | 0.27814  | 0.38172  | 0.14275  | 0.15088  | 0.43765  | 0.35547  | 0.37974  | 0.19372  | 0.2742   | 0.16762  | -0.96388 | -0.41522 | -0.68162 | -1.41583 | -1.13603 | -0.89216 | -0.78311 | -0.72102 |
| MAL13P1.178 | 0.39818  | 0.57286  | 0.52214  | 1.03111  | 1.01757  | 0.4902   | 0.61659  | 0.7195   | 0.40929  | 0.21969  | 0.00632  | 0.12115  | 0.04305  | 0.18221  | 0.23459  | 0.39147  | 0.17512  | 0.27989  | 0.54083  | 0.13189  | -0.15398 | -0.10443 | -0.28762 | 0.04828  |
| PF14_0621   | 0.79726  | 1.13601  | 1.32144  | 1.51485  | 1.77082  | 1.7133   | 1.42504  | 1.0694   | 0.55324  | -0.11121 | -0.14524 | -0.66516 | -1.24701 | -1.80833 | -1.62828 | -1.72781 | -1.34872 | -1.31655 | -0.35707 | -0.5902  | -0.37581 | -0.10179 | 0.27803  | 0.72355  |
| PFB0630c    | 0.69081  | 1.04496  | 0.89745  | 1.00446  | 1.01548  | 0.63354  | 0.68928  | 0.85455  | 0.93107  | 1.12423  | 0.98723  | 0.71579  | 0.61536  | 0.41402  | -0.13491 | -0.37622 | -0.44186 | -0.84607 | -1.10772 | -0.55791 | -0.15558 | 0.12339  | 0.3367   | 0.60877  |
| PFE0760w    | -0.36356 | -0.34106 | -0.49762 | -0.48073 | -0.45354 | -0.09749 | 0.20344  | 0.05946  | -0.18365 | -0.16303 | 0.14704  | 0.30137  | 0.46747  | 0.54585  | 0.68539  | 0.69298  | 0.65713  | 0.50105  | 0.32283  | -0.00357 | -0.13088 | -0.049   | -0.23651 | -0.2461  |
| PF14_0418   | 0.13024  | 0.55606  | 0.84636  | 0.42189  | 0.34834  | 0.5637   | 0.64622  | 0.64061  | 1.07757  | 0.68249  | 0.68504  | 0.77328  | 0.72617  | 0.50613  | 0.45665  | 0.39541  | 0.42838  | 0.28738  | 0.13415  | 0.0663   | -0.08534 | -0.0548  | -0.231   | -0.18986 |
| PF14_0119   | 0.30676  | 0.04216  | -0.90021 | -0.41524 | -0.92629 | -1.15986 | -1.4519  | -1.50912 | -2.09119 | -2.31248 | -2.44781 | -2.53558 | -2.69134 | -2.20831 | -1.19698 | 0.04162  | 0.72787  | 0.92456  | 1.77351  | 1.4207   | 1.22004  | 1.27782  | 1.10876  | 0.35937  |
| PFD0720w    | 0.99407  | 0.25617  | -0.13542 | -0.73936 | -0.86636 | -1.30093 | -1.70372 | -1.80373 | -2.24947 | -2.71234 | -2.93658 | -3.10859 | -3.32898 | -3.49229 | -2.84582 | -2.38128 | -1.26831 | -0.03912 | 1.84031  | 0.85328  | 0.95732  | 1.09688  | 1.11338  | 1.26154  |
| PF08_0045   | -0.30637 | -0.65179 | -0.58377 | -0.52215 | -0.43814 | -0.29001 | -0.32095 | -0.47044 | -0.40021 | -0.26255 | 0.08097  | 0.29374  | 0.53184  | 0.61087  | 0.74636  | 0.75513  | 0.50648  | 0.56728  | 0.41769  | 0.05223  | -0.14777 | -0.3511  | -0.48737 | -0.54785 |
| PF10_0325   | -0.86249 | -0.32646 | 0.01931  | -0.01593 | -0.03146 | 0.35697  | 0.25968  | 0.47703  | 0.58694  | 0.93038  | 0.92828  | 0.96691  | 0.70075  | 0.41644  | -0.05434 | -0.382   | -1.12345 | -1.39964 | -1.6017  | -2.06188 | -2.04211 | -1.41771 | -1.48117 | -1.15224 |
| PF14_0386   | -0.84299 | -0.95746 | -0.71356 | -0.7402  | -0.42916 | -0.10211 | 0.31064  | 0.47016  | 0.30931  | 0.32516  | 0.32833  | 0.40187  | 0.14181  | 0.32275  | 0.23489  | 0.28013  | -0.00186 | 0.33528  | -0.10343 | -0.10911 | -0.52492 | -0.84604 | -0.95087 | -1.09995 |
| PFF0120w    | -0.71113 | -0.40833 | -0.0152  | -0.07891 | -0.04467 | 0.56316  | 0.81637  | 1.28957  | 1.3351   | 1.29795  | 1.33295  | 1.33871  | 0.74919  | 0.47858  | 0.23884  | 0.15672  | -0.2363  | -0.21268 | -0.43525 | -0.60446 | -0.95942 | -0.99274 | -1.11008 | -0.91041 |
| PF08_0072   | 1.37685  | 1.75407  | 1.07215  | 1.95487  | 2.0796   | 1.48995  | 1.02518  | 0.83168  | -0.3109  | -0.5153  | -0.20698 | -0.53797 | -0.6868  | -1.15483 | -0.90398 | -1.27125 | -0.55467 | -0.99238 | 0.51696  | 0.56695  | 1.06784  | 0.78166  | 1.68314  | 1.12004  |
| PFL0870w    | 1.22279  | 0.36191  | -0.1125  | -0.56854 | -0.67304 | -1.13606 | -1.43219 | -1.61847 | -2.08023 | -2.5172  | -2.65179 | -2.89081 | -2.88779 | -2.99629 | -2.7591  | -2.3488  | -1.44151 | -1.03317 | 1.07728  | 0.96692  | 1.17493  | 1.17798  | 1.14696  | 1.22424  |
| MAL13P1.257 | 0.41903  | 0.81367  | 0.76882  | 0.69672  | 0.63034  | 0.50434  | 0.28567  | 0.42305  | 0.15901  | 0.23525  | 0.7196   | 0.83982  | 0.57145  | 0.2914   | 0.14082  | 0.0227   | -0.27533 | -0.31007 | -0.38909 | -0.67712 | -0.93774 | -0.47098 | -0.24341 | -0.092   |
| PFE0845c    | -1.12591 | -0.36117 | 0.12121  | 0.19399  | 0.28257  | 0.64441  | 0.42397  | 0.81337  | 0.56573  | 0.70345  | 0.85319  | 0.59834  | 0.47417  | 0.39969  | 0.08393  | -0.21068 | -0.34905 | -0.90599 | -1.12094 | -2.31613 | -2.28499 | -1.72288 | -1.83363 | -1.37859 |
| PFF1495w    | 0.34677  | 0.46978  | 0.4661   | 0.10378  | 0.12647  | -0.02566 | 0.02567  | -0.20489 | -0.62655 | -0.66943 | -0.80038 | -0.80434 | -0.8583  | -0.38968 | -0.0124  | -0.28699 | 0.72568  | 0.91432  | 1.01366  | 0.98723  | 0.8945   | 0.52169  | 0.39329  | 0.24099  |
| PFF1430c    | 0.67837  | 0.38924  | 0.33274  | 0.22852  | 0.10503  | -0.00119 | 0.23119  | 0.38451  | 0.69846  | 0.77339  | 0.69372  | 0.53869  | 0.15241  | -0.29249 | -0.72874 | -1.13784 | -1.24503 | -1.26387 | -0.0621  | 0.10899  | 0.20059  | 0.38587  | 0.48974  | 0.72683  |
| PF14_0269   | -0.12587 | 0.39339  | 0.81612  | 0.86098  | 1.07361  | 1.3736   | 1.3864   | 1.29534  | 1.09838  | 0.91158  | 0.76983  | 0.61642  | 0.32268  | -0.008   | 0.23454  | 0.14618  | 0.16148  | -0.13055 | 0.38136  | -0.33153 | -0.50795 | -0.29346 | -0.08586 | -0.09552 |
| PFL2030w    | -0.47241 | -0.30557 | 0.23615  | -0.05585 | -0.0711  | 0.27631  | 0.46963  | 0.52128  | 0.5935   | 0.72462  | 0.7161   | 0.8835   | 0.52692  | 0.48474  | 0.21904  | 0.22961  | 0.20513  | 0.00168  | -0.19971 | -0.42446 | -0.69228 | -0.53734 | -0.60467 | -0.28187 |
| MAL7P1.31   | -0.7625  | -0.48937 | -0.17126 | 0.25245  | 0.51248  | 0.7352   | 0.85681  | 1.14295  | 1.06544  | 0.93673  | 1.26688  | 1.02067  | 0.70378  | 0.47746  | 0.31404  | 0.12017  | -0.3059  | -0.39815 | -0.42712 | -1.1023  | -1.2304  | -1.3425  | -1.28898 | -0.84587 |
| PFA0125c    | 1.51338  | 0.45047  | -0.13755 | -0.72759 | -0.91147 | -1.353   | -1.75902 | -2.27014 | -2.86399 | -3.3072  | -3.47749 | -3.46815 | -3.57373 | -3.37074 | -3.61963 | -3.04923 | -1.78768 | -0.58498 | 0.81654  | 1.28834  | 1.40173  | 1.39798  | 1.4159   | 1.36     |
| PFE1605w    | -2.89625 | -2.82423 | -1.64794 | -1.5798  | -0.3914  | 1.00448  | 1.81192  | 1.61523  | 1.61516  | 1.38462  | 0.96273  | 0.80392  | 0.48398  | 0.00861  | -0.46812 | -0.95321 | -1.30259 | -1.62571 | -2.26568 | -2.61523 | -3.03193 | -2.98751 | -3.15469 | -2.81038 |
| PF13_0165   | 0.27315  | 0.49498  | 0.46962  | 0.44076  | 0.27679  | 0.27956  | 0.41941  | 0.68099  | 1.04372  | 1.15149  | 1.03295  | 0.86258  | 0.6932   | 0.14904  | -0.2042  | -0.62993 | -0.95119 | -0.90789 | -1.0548  | -0.71614 | -0.48583 | -0.03937 | 0.06853  | 0.01902  |
| PF10_0113   | 0.45612  | 0.66822  | 0.04852  | 1.24152  | 1.49194  | 1.22404  | 1.29755  | 1.84978  | 1.50645  | 1.20238  | 1.03961  | 0.97551  | 0.51389  | 0.26257  | -0.10759 | 0.05119  | -0.66774 | 0.25028  | 0.15274  | 0.10987  | 0.08967  | 0.23195  | 0.21253  | 0.20115  |
| PF10_0049   | 1.14126  | 0.81221  | 0.27193  | 0.07191  | -0.08617 | -0.34426 | -0.57071 | -0.48802 | -0.557   | -0.49869 | -0.58247 | -0.48643 | -0.70458 | -0.53867 | -0.39597 | -0.04374 | 0.07186  | 1.04272  | 0.46429  | 1.09854  | 0.76453  | 0.71416  | 0.79065  | 0.25205  |
| PF1215w     | 0.52453  | 0.67812  | 0.40079  | 0.55216  | 0.49286  | 0.44855  | 0.4614   | 0.43898  | 0.33073  | 0.22353  | 0.3371   | 0.25131  | 0.34639  | 0.10115  | 0.13372  | -0.03699 | -0.24592 | -0.20944 | -0.24134 | -0.26468 | -0.04643 | 0.12593  | 0.26842  | 0.46818  |
| MAL13P1.303 | -1.19303 | -1.24562 | -1.14795 | -1.25837 | -1.23333 | -1.14097 | -1.26669 | -1.11286 | -1.0228  | -0.59935 | 0.06664  | 0.42841  | 0.69839  | 0.70106  | 0.98475  | 0.81701  | 0.37847  | 0.32359  | 0.31195  | -0.18518 | -0.43247 | -0.69521 | -0.66564 | -0.84399 |
| PFE0435c    | 0.20884  | -0.25305 | -0.51026 | -0.42322 | -0.58835 | -0.49197 | -0.30684 | -0.14452 | -0.11884 | -0.19617 | -0.01786 | 0.13962  | 0.36419  | 0.52912  | 0.82925  | 0.7476   | 0.42924  | 0.98488  | 0.95923  | 0.94101  | 0.72592  | 0.01411  | 0.05273  | -0.54463 |
| PFA0400c    | -0.88079 | -0.96815 | -0.76565 | -0.99638 | -0.98834 | -0.731   | -0.65757 | -0.51685 | -0.36949 | -0.23802 | 0.23707  | 0.33599  | 0.47551  | 0.35002  | 0.82513  | 0.75055  | 0.26522  | 0.48161  | 0.1638   | -0.38044 | -0.82349 | -0.88058 | -1.08253 | -1.16207 |
| PFF0740c    | -0.65292 | -0.65343 | -0.56398 | -0.63013 | -0.65393 | -0.53562 | -0.53812 | -0.54105 | -0.36811 | -0.17485 | -0.09467 | 0.12983  | 0.39541  | 0.58858  | 0.66477  | 0.69428  | 0.7132   | 0.40064  | 0.29128  | 0.04245  | -0.21399 | -0.30389 | -0.45597 | -0.50258 |
| MAL13P1.242 | 0.52934  | 0.7752   | 0.81511  | 0.23455  | 0.55792  | 0.36927  | 0.34495  | 0.52774  | 0.39234  | 0.22947  | 0.24885  | 0.06076  | -0.07607 | -0.24354 | -0.07978 | -0.18752 | -0.28658 | -0.17618 | 0.05518  | 0.08331  | -0.10908 | 0.01329  | 0.30549  | 0.4528   |
| PFL0485w    | 0.0791   | -0.29361 | -0.32807 | -0.06868 | 0.09541  | 0.24036  | 0.0336   | 0.20597  | 0.37206  | 0.5606   | 0.74733  | 0.76697  | 0.58829  | 0.35992  | 0.08554  | 0.00486  | -0.17792 | 0.18989  | 0.23945  | 0.10176  | 0.11024  | -0.16882 | -0.13269 | -0.1332  |
| PFD0565c    | 0.30414  | 0.25761  | 0.63517  | 0.89988  | 1.17602  | 1.37455  | 1.22822  | 1.23236  | 1.21331  | 1.29006  | 1.13533  | 1.11555  | 0.6792   | 0.4684   | -0.09475 | -0.41022 | -0.57435 | -0.26821 | -1.11479 | -0.74765 | -0.91814 | -0.69778 | -0.53826 | -0.09281 |
| MAL7P1.159  | -0.81905 | -0.95438 | -1.81179 | -1.10473 | -1.32983 | -1.14964 | -1.2031  | -0.95308 | -1.0823  | 0.564    | 0.77198  | 0.89314  | 0.87489  | 0.86349  | 0.68517  | 0.59973  | 0.41276  | 0.19285  | 0.21489  | -0.21003 | -0.58603 | -0.72837 | -0.66972 | -0.86419 |
| PFE1365w    | 0.91805  | 1.29381  | 0.9946   | 1.10822  | 1.28943  | 0.83479  | 0.7278   | 0.77987  | 0.65351  | 0.45226  | 0.20543  | 0.00848  | -0.61859 | -0.9669  | -1.16679 | -1.24866 | -1.52374 | -1.03618 | -0.72263 | -0.36513 | -0.10734 | 0.1481   | 0.37657  | 0.64223  |
| PF1705w     | 0.08882  | 0.2616   | 0.36097  | 0.50899  | 0.45909  | 0.28349  | 0.08779  | 0.04567  | -0.26485 | -0.29844 | -0.10347 | -0.05095 | 0.19779  | 0.30626  | 0.55456  | 0.38085  | 0.30065  | -0.0424  | 0.40352  | 0.07209  | 0.14631  | -0.1516  | -0.09574 | 0.32224  |
| PF08_0011   | -0.9161  | -0.79685 | -0.41993 | -0.60072 | -0.26459 | 0.14968  | 0.41453  | 0.69002  | 0.8928   | 0.95945  | 0.93281  | 0.94641  | 0.76822  | 0.7024   | 0.55754  | 0.329    | 0.13984  | 0.0386   | -0.14501 | -0.29238 | -0.49494 | -0.44935 | -0.65335 | -0.69008 |
| PFF0330w    | -0.54156 | -0.06855 | 0.04153  | 0.13275  | 0.04792  | -0.07266 | -0.10579 | -0.12483 | -0.61555 | -0.35359 | -0.30131 | -0.22899 | 0.09132  | 0.13771  | 0.3584   | 0.41316  | 0.53931  | 0.04352  | -0.10821 | -0.41901 | -0.43413 | -0.3078  | -0.48621 | -0.3638  |
| PFF1490w    | 0.99072  | 0.44602  | 0.23455  | 0.31709  | 0.39075  | 0.6691   | 0.65597  | 0.67528  | 0.33181  | 0.01329  | -0.00074 | -0.16508 | -0.08404 | -0.07233 | -0.08859 | -0.17191 | -0.11793 | -0.05361 | 0.92182  | 0.69592  | 1        |          |          |          |

|                |          |          |          |          |          |          |          |          |          |          |           |          |          |          |          |          |          |          |          |          |          |          |          |          |
|----------------|----------|----------|----------|----------|----------|----------|----------|----------|----------|----------|-----------|----------|----------|----------|----------|----------|----------|----------|----------|----------|----------|----------|----------|----------|
| PF14 0701      | 0.02607  | 0.33083  | 0.24039  | 0.26897  | 0.33938  | 0.20395  | 0.3427   | 0.07371  | 0.17246  | 0.03692  | 0.17507   | 0.26117  | 0.39128  | 0.3804   | 0.28812  | 0.32824  | 0.07442  | 0.39972  | 0.40605  | 0.20487  | 0.08093  | 0.25682  | 0.09928  | 0.45619  |
| PF1515w        | 0.0217   | 0.47905  | 0.67189  | 0.7477   | 0.86103  | 0.79889  | 0.55805  | 0.49864  | 0.20558  | -0.02693 | -0.10233  | -0.05316 | 0.07392  | 0.16717  | 0.46556  | 0.36644  | 0.43167  | 0.3118   | 0.58804  | 0.0288   | -0.37933 | -0.50556 | -0.41268 | -0.14186 |
| PF0271c        | -1.64121 | -0.63285 | -0.01367 | 0.01931  | -0.04619 | 0.34029  | 0.25795  | 0.42573  | 0.08108  | 0.52133  | 0.62545   | 0.84912  | 0.8365   | 0.57608  | 0.55082  | 0.23619  | -0.27434 | -0.49889 | -0.65167 | -1.28074 | -1.56667 | -1.25726 | -1.25266 | -1.19163 |
| PF13 0063      | -0.72146 | -0.68679 | -0.52598 | -0.51198 | -0.72344 | -0.62136 | -0.51977 | -0.39865 | -0.46889 | -0.31168 | -0.14358  | 0.0172   | 0.07278  | 0.09755  | 0.49841  | 0.62139  | 0.52888  | 0.34656  | 0.60931  | 0.12235  | -0.08285 | -0.26676 | -0.34954 | -0.49255 |
| PF11 0225      | 0.40115  | 0.51337  | 0.6392   | 0.76878  | 0.81017  | 0.97201  | 0.95055  | 0.93565  | 0.94687  | 0.80473  | 0.74634   | 0.61318  | 0.60119  | 0.25419  | -0.04026 | -0.30387 | -0.7891  | -0.69544 | -0.77964 | -0.71997 | -0.35802 | -0.16972 | 0.04307  | 0.20464  |
| FFF1035w       | 0.85217  | 0.72047  | 0.42311  | 0.7465   | 0.75216  | 0.55074  | 0.17518  | 0.01947  | -0.41189 | -0.27017 | -0.18631  | -0.32311 | -0.3277  | -0.35201 | -0.45606 | -0.27657 | -0.1451  | 0.04443  | 1.24007  | 0.92956  | 0.99036  | 0.90264  | 1.33038  | 1.26155  |
| PF13 0170      | -0.4485  | 0.17664  | 0.64943  | 0.74687  | 0.66722  | 0.87744  | 0.6776   | 0.56442  | 0.4833   | 0.37127  | 0.46968   | 0.42454  | 0.4259   | 0.2404   | 0.22387  | -0.00192 | -0.56506 | -0.40844 | -0.6969  | -1.03918 | -0.98373 | -0.90349 | -0.79485 | -0.55178 |
| PF13 0177      | 1.10307  | 1.33265  | 1.16081  | 1.41087  | 1.24356  | 1.15281  | 1.03396  | 1.15938  | 0.9007   | 0.47701  | 0.46452   | 0.16349  | -0.29684 | -0.66042 | -0.743   | -0.99286 | -0.98864 | -1.2482  | -0.72563 | -0.62012 | -0.09187 | 0.32357  | 0.51429  | 0.87786  |
| PF14 0609      | -0.48466 | -0.15994 | -0.45766 | -0.21712 | -0.07242 | 0.17432  | 0.34116  | 0.88189  | 1.10084  | 1.16463  | 1.0598    | 0.99651  | 0.81371  | 0.41131  | 0.41468  | 0.26865  | 0.15867  | 0.0895   | -0.21699 | -0.1489  | -0.41064 | -0.43515 | -0.34876 | -0.21183 |
| FFA0290w       | -0.10995 | -0.36975 | -0.65013 | -0.59053 | -0.67011 | -0.84436 | -0.86245 | -0.70011 | -0.63116 | -0.22633 | 0.05747   | 0.17372  | 0.05239  | 0.02494  | 0.05633  | 0.19352  | 0.17917  | 0.44104  | 0.41898  | 0.54218  | 0.08852  | 0.05108  | 0.15113  | 0.12431  |
| PF11 0363      | 0.29252  | 0.25916  | 0.21075  | 1.00675  | 1.14584  | 1.13843  | 0.95159  | 1.04744  | 0.8791   | 0.66546  | 0.5807    | 0.56895  | 0.33926  | 0.30319  | 0.29554  | 0.39462  | 0.26029  | 0.27999  | 0.63101  | 0.38894  | 0.11873  | -0.07523 | 0.05064  | 0.05489  |
| PFI0580c       | 0.23583  | 0.16858  | 0.27269  | 0.32204  | 0.45913  | 0.27175  | 0.11554  | -0.03893 | -0.05746 | -0.08473 | -0.29116  | -0.28262 | -0.3193  | -0.34943 | -0.42481 | -0.40093 | -0.5229  | -0.42213 | -0.41902 | 0.0159   | 0.10855  | -0.08397 | 0.21418  | 0.5985   |
| MAL7P1.177     | -0.5247  | -0.20929 | -0.24522 | -0.18012 | -0.24722 | -0.19431 | 0.07494  | 0.77948  | 0.75739  | 0.37338  | 0.41977   | 0.25816  | 0.68697  | 0.5831   | 0.64903  | 0.55733  | 0.63385  | 0.12535  | 0.08028  | -0.26886 | -0.7461  | -1.09812 | -1.24912 |          |
| PF11 0180      | 0.3432   | 0.08462  | -0.85633 | 0.20248  | 0.14468  | -0.34097 | -0.60635 | -0.83766 | -1.2605  | -1.24812 | -1.37583  | -1.43137 | -1.54355 | -1.31925 | -0.55627 | 0.20718  | 0.67171  | 0.4785   | 1.42311  | 1.05927  | 1.21642  | 0.74206  | 0.86247  | 0.78732  |
| PF07 0065      | -1.69512 | -1.80082 | -2.11937 | -2.96213 | -2.41153 | -3.04578 | -2.61042 | -3.18731 | -1.69237 | -0.62011 | -0.14398  | 0.25512  | 0.74307  | 0.92451  | 0.97841  | 0.80712  | 0.55895  | 0.29988  | -0.09101 | -0.30687 | -0.79701 | -1.0897  | -1.49904 | -1.51466 |
| MAL13P1.171    | -0.25148 | -0.12563 | 0.39019  | 0.48062  | 0.60157  | 0.76468  | 0.67681  | 0.6931   | 0.43776  | 0.18012  | 0.34208   | 0.37806  | 0.26412  | 0.13376  | 0.22189  | 0.24853  | -0.15861 | -0.14309 | -0.14735 | -0.42158 | -0.5332  | -0.72363 | -0.59304 | -0.5099  |
| PF14 0287      | 0.67303  | 0.77828  | 0.83312  | 0.99016  | 0.85532  | 0.87696  | 0.71841  | 0.59311  | 0.26725  | -0.16224 | 0.06109   | -0.52573 | -0.79173 | -0.80128 | -0.63003 | -0.51053 | -0.27987 | -0.22347 | 0.51774  | 0.4596   | 0.7317   | 0.88076  | 1.13735  | 1.21831  |
| PF14 0429      | 0.24613  | 0.49308  | 0.75287  | 0.80183  | 0.84131  | 1.24916  | 1.23544  | 1.27033  | 1.06108  | 0.91076  | 0.85848   | 0.55619  | 0.31875  | -0.11778 | -0.34801 | -0.65791 | -0.62666 | -0.92456 | -1.24992 | -1.10597 | -0.68333 | -0.37502 | -0.04872 | 0.21629  |
| PF07 0034      | -0.07012 | 0.59549  | 0.45654  | 0.62859  | 0.91414  | 0.4048   | 0.13629  | 0.40456  | -0.06502 | -0.30526 | 0.01839   | 0.14304  | 0.13784  | 0.05758  | 0.21354  | 0.26121  | -0.03975 | 0.09718  | 0.05793  | -0.19714 | -0.32289 | -0.26281 | -0.1231  | -0.04084 |
| PF10_API0001:t |          |          |          |          |          |          |          |          |          |          |           |          |          |          |          |          |          |          |          |          |          |          |          |          |
| RNA            | -1.16436 | -0.68867 | -2.67832 | -2.17617 | -2.7387  | -2.65548 | -3.34973 | -2.62165 | -2.45698 | -2.69064 | -1.78841  | -1.5452  | -1.08494 | -0.89651 | 0.50409  | 0.24724  | 0.31036  | 1.22531  | 1.14128  | 0.00429  | 0.40372  | 0.41181  | -0.41419 | -0.96362 |
| PFE1255w       | -0.02627 | -0.28229 | -0.61222 | -0.77824 | -0.76527 | -1.07185 | -1.10116 | -1.10398 | -1.09422 | -0.89909 | -0.67026  | -0.51033 | -0.06889 | 0.24956  | 0.38188  | 0.28691  | 0.44898  | 0.4131   | -0.11023 | 0.39079  | 0.36996  | 0.08765  | 0.00803  | 0.0865   |
| PFD0125c       | -1.44388 | -1.63666 | -1.32991 | -1.55883 | -1.07931 | -1.23609 | -0.42797 | 1.73671  | 2.37639  | 2.21442  | 2.10678   | 1.57173  | 1.18971  | 0.61297  | 0.16222  | -0.31981 | -1.22465 | -1.32095 | -1.21944 | -1.41285 | -1.38828 | -1.4502  | -1.49315 | -1.50264 |
| FFF0650w       | -0.46288 | -0.77396 | -1.10076 | -1.10269 | -1.24797 | -1.37641 | -1.59222 | -1.37796 | -1.3372  | -1.04044 | -0.5258   | -0.45919 | 0.00522  | 0.00857  | 0.39255  | 0.66151  | 0.19644  | 0.66217  | 0.88086  | 0.51152  | 0.30751  | -0.23168 | -0.21711 | -0.26387 |
| PFI1765c       | 0.47456  | 0.99772  | 1.03276  | 1.53302  | 1.68307  | 1.62626  | 1.76373  | 1.58753  | 1.12323  | 0.73402  | 0.52081   | 0.43073  | 0.27097  | 0.17865  | -0.25574 | -0.35754 | -0.39379 | -0.30277 | -0.58384 | -0.19059 | -0.22497 | 0.28594  | 0.35397  | 1.02156  |
| PF11 0044      | -0.8916  | -1.08474 | -1.08918 | -1.09069 | -1.03943 | -0.99593 | -0.75152 | -0.65358 | 0.05533  | 0.19869  | 0.25133   | 0.54091  | 0.87068  | 1.00481  | 0.64475  | 0.52916  | 0.30934  | 0.43965  | -0.31566 | -0.1956  | -0.47503 | -0.62577 | -0.79491 | -0.83685 |
| PFB0150c       | 0.94759  | 0.29071  | 0.03324  | -0.17588 | -0.4338  | -0.64499 | -0.84249 | -1.10083 | -1.22657 | -1.4246  | -1.6033   | -1.65292 | -1.73085 | -1.83377 | -1.80889 | -1.5476  | -0.25994 | 0.2256   | 0.96055  | 1.20022  | 1.27245  | 1.32882  | 1.35925  | 1.23329  |
| PF03071w       | 0.40128  | 0.08009  | -0.23721 | 0.08974  | 0.43633  | -0.14709 | -0.61631 | -0.43853 | -0.7339  | -0.74962 | -0.32698  | -0.4453  | -0.32921 | -0.42137 | -0.33781 | -0.22727 | -0.23567 | -0.03839 | 0.8481   | 0.59992  | 0.62172  | 0.35312  | 0.71407  | 0.94878  |
| PF13 0210      | 0.30354  | 0.37817  | 0.6447   | 0.66288  | 0.69765  | 0.68401  | 0.52186  | 0.11957  | 0.13806  | 0.19175  | -0.12504  | -0.11248 | 0.03556  | 0.31704  | -0.05037 | -0.09995 | 0.30927  | 0.07792  | -0.64768 | 0.09276  | 0.22767  | 0.51455  | 0.60885  | 0.61562  |
| PF13 0032      | -1.28161 | -1.3821  | -1.35485 | -1.77438 | -1.69206 | -1.91192 | -1.87613 | -1.97488 | -1.57034 | -0.9767  | -0.62102  | -0.00986 | 0.53007  | 0.92895  | 0.98692  | 0.88887  | 0.54342  | 0.45357  | 0.40508  | 0.02232  | -0.48721 | -0.73427 | -1.10281 | -1.32729 |
| PFD0250c       | 0.14757  | 0.08591  | -0.38645 | 0.02176  | -0.10619 | -0.04097 | -0.13313 | -0.29886 | -0.24304 | -0.32576 | -0.10021  | -0.14614 | 0.0561   | 0.10746  | 0.27508  | 0.41672  | 0.36949  | 0.3907   | 0.4635   | 0.37621  | 0.10963  | 0.105    | 0.06505  | -0.21642 |
| PFI0235w       | -1.17687 | -1.35571 | -1.29102 | -1.44505 | -1.4253  | -1.31105 | -1.30109 | -0.82158 | -0.37932 | 0.00575  | 0.47777   | 0.63291  | 0.87974  | 0.65078  | 0.96948  | 0.87296  | 0.24385  | 0.49412  | 0.18672  | -0.18514 | -0.47268 | -0.70993 | -0.8738  | -1.13581 |
| PF13 0316      | -0.96563 | -0.02481 | 0.26513  | 0.20955  | 0.16812  | 0.13817  | 0.16076  | 0.52965  | 0.43131  | 0.50694  | 0.34575   | 0.47997  | 0.29354  | 0.099    | 0.13123  | -0.21163 | -0.32221 | -0.88784 | -1.57838 | -1.90681 | -1.82331 | -1.53014 | -1.37276 | -1.09401 |
| PFB0250w       | -0.12782 | -0.43312 | -0.40657 | -0.27428 | -0.3702  | -0.43616 | -0.22453 | 0.02122  | 0.23069  | 0.26744  | 0.5464    | 0.69587  | 0.64464  | 0.67497  | 0.8521   | 0.84593  | 0.63253  | 0.41619  | 0.56135  | 0.13419  | 0.08917  | -0.14939 | -0.29666 | -0.43279 |
| PF14 0598      | -1.30851 | -0.7537  | -0.5237  | -0.38922 | -0.05897 | 0.04059  | 0.05865  | -0.20757 | 0.2284   | 0.5054   | 0.96212   | 1.26345  | 1.12319  | 0.62065  | -0.11406 | -0.22698 | -0.58205 | -0.70499 | -1.37454 | -1.53282 | -1.26921 | -1.43269 | -1.26123 |          |
| PF13 0318      | 0.36239  | 0.56321  | 0.423    | 0.72109  | 0.67429  | 0.74527  | 0.53803  | 0.66128  | 0.47035  | 0.43089  | 0.48095   | 0.42118  | 0.40903  | 0.24044  | 0.38483  | 0.20581  | -0.09265 | -0.08632 | 0.35886  | -0.05842 | -0.05006 | -0.17876 | 0.01736  | 0.18381  |
| PF11 0219      | -0.87263 | -0.74343 | -1.56954 | -1.09314 | -1.03197 | -0.94045 | -0.98046 | -0.79918 | -0.33635 | 0.2965   | 0.55463   | 0.7473   | 0.82263  | 0.58027  | 0.54524  | 0.2894   | 0.26563  | 0.26637  | 0.08661  | -0.14372 | -0.20751 | -0.52603 | -0.75186 | -0.65972 |
| PFI1300c       | 0.03309  | 0.02219  | -0.23466 | -0.06843 | -0.14048 | -0.27094 | -0.22273 | -0.41678 | -0.55891 | -0.73046 | -0.94381  | -0.83648 | -0.59461 | 0.11164  | 0.17481  | 0.56152  | 0.76871  | 0.72293  | 0.06197  | 0.60162  | 0.56948  | 0.47383  | 0.31113  | 0.16269  |
| PF14 0021      | 0.1918   | 0.43794  | 0.56357  | 0.26688  | 0.06169  | 0.04949  | -0.07289 | -0.13502 | -0.48676 | -0.66343 | -0.77634  | -0.94032 | -0.96991 | -1.14823 | -0.99056 | -0.78982 | -0.22377 | -0.10945 | 0.62522  | 0.46232  | 0.609    | 0.46726  | 0.61433  | 0.75844  |
| PFC1055w       | 0.1286   | 0.65571  | 0.74249  | 1.05104  | 1.08714  | 0.97821  | 0.94524  | 1.07991  | 0.99212  | 0.86917  | 0.99145   | 0.90799  | 0.81133  | 0.77996  | 0.55302  | 0.45788  | 0.01335  | 0.17675  | -0.08736 | -0.17247 | -0.25065 | -0.24688 | -0.35987 | -0.0041  |
| PFL0095c       | -0.07125 | -0.24929 | 0.22052  | 0.13603  | -0.31159 | 0.11557  | 0.023    | 0.10889  | 0.2423   | -0.17265 | 0.187     | 0.17457  | 0.43144  | 0.05579  | 0.38829  | 0.39129  | 0.18264  | 0.21377  | 0.66718  | 0.18668  | 0.09798  | 0.12363  | 0.0753   | -0.08002 |
| PFB0390w       | -1.28023 | -1.25265 | -1.32487 | -1.65949 | -1.59872 | -1.59704 | -1.30432 | -1.01838 | -0.32258 | -0.01485 | 0.23582</ |          |          |          |          |          |          |          |          |          |          |          |          |          |

|                |          |          |          |          |          |          |          |          |          |          |          |          |          |          |          |          |          |          |          |          |          |          |          |          |
|----------------|----------|----------|----------|----------|----------|----------|----------|----------|----------|----------|----------|----------|----------|----------|----------|----------|----------|----------|----------|----------|----------|----------|----------|----------|
| MAL13P1.312    | -0.29303 | 0.23752  | 0.1894   | 0.58067  | 0.66337  | 0.58097  | 0.38414  | 0.40915  | 0.03572  | -0.26623 | 0.03448  | -0.37092 | -0.39942 | -0.43245 | -0.3628  | -0.36908 | -0.03195 | -0.01286 | 0.54505  | 0.628    | 0.98602  | 0.8088   | 1.14526  | 1.43806  |
| PF14_0054      | 0.65473  | 0.01035  | -0.21726 | -0.53713 | -0.63695 | -0.72682 | -0.78404 | -0.77542 | -0.83603 | -0.91953 | -1.13803 | -1.25691 | -1.68141 | -1.63533 | -1.26405 | -0.36653 | -0.16067 | 0.95935  | 0.81543  | 0.8962   | 0.8514   | 0.86435  | 0.77968  |          |
| PF14_0735      | -0.26982 | -0.0861  | 0.12979  | 0.06868  | 0.08787  | 0.00478  | -0.13336 | -0.15438 | -0.18791 | -0.45531 | -0.32236 | -0.4016  | -0.19037 | -0.47946 | -0.30371 | -0.29897 | -0.30149 | -0.00924 | -0.00964 | -0.0147  | 0.19264  | 1.04748  | 0.73143  | 0.63495  |
| PFD0295c       | -0.11887 | -0.72364 | -0.72112 | -1.47023 | -1.83417 | -2.28316 | -2.57948 | -2.99806 | -3.39452 | -3.75679 | -3.94164 | -4.10337 | -3.73763 | -3.3258  | -1.76961 | -0.27739 | 0.76358  | 0.82454  | 0.85194  | 1.15819  | 1.0275   | 0.64308  | 0.49388  | -0.02232 |
| PFL2375c       | -0.42329 | -0.78937 | -1.05146 | -1.05561 | -1.14736 | -1.14032 | -1.23324 | -1.05642 | -0.54387 | -0.28213 | -0.15441 | 0.26259  | 0.42724  | 0.63344  | 0.52408  | 0.69965  | 0.40684  | 0.75233  | 0.52443  | 0.3638   | -0.05148 | -0.19838 | -0.3943  | -0.78067 |
| PFE1025c       | -1.02029 | -1.04019 | -0.78889 | -1.08785 | -1.30696 | -0.95048 | -0.57996 | -0.55173 | -0.20517 | -0.02172 | 0.35122  | 0.26954  | 0.63612  | 0.46313  | 0.6855   | 0.59779  | 0.45433  | 0.11623  | 0.34209  | -0.20354 | -0.55487 | -0.84438 | -0.99949 | -1.07887 |
| PF0090w        | -0.23373 | -0.0842  | -0.21284 | 0.02083  | 0.07628  | 0.5497   | 1.47355  | 1.07031  | -0.19975 | 0.77688  | 0.34073  | 0.04059  | -0.05649 | 0.00431  | -0.0657  | -0.15167 | -0.24575 | -0.82734 | -0.89705 | -1.06712 | -0.90731 | 0.24541  | -0.21503 | -0.37983 |
| PFD0285c       | -0.29153 | -0.21587 | -0.06636 | -0.08025 | 0.16472  | 0.34123  | 0.65615  | 0.80245  | 0.80974  | 0.9164   | 0.77449  | 0.5897   | 0.52872  | 0.36907  | 0.18987  | 0.09957  | 0.19222  | 0.12279  | -0.0463  | 0.15905  | 0.32842  | 0.24733  | 0.45368  | 0.40825  |
| PF07_0047      | -0.66329 | -0.59754 | -0.60371 | -0.42035 | -0.28961 | -0.32444 | -0.20232 | -0.04121 | 0.45345  | 0.73055  | 0.77717  | 0.80571  | 0.84171  | 0.75622  | 0.38476  | 0.02842  | -0.31865 | -0.31437 | -0.44244 | -0.68705 | -0.56251 | -0.67235 | -0.34606 | -0.40786 |
| PFL1080c       | 0.46355  | 0.79027  | 0.4826   | 0.80837  | 0.68667  | 0.91249  | 0.82327  | 0.76685  | 0.48635  | 0.09186  | -0.21733 | -0.49346 | -0.27567 | -0.32436 | 0.06523  | 0.20138  | 0.12437  | -0.05233 | 0.51131  | 0.14017  | 0.10719  | 0.15572  | 0.04118  | 0.34469  |
| PF10_0360      | -0.42808 | -0.7469  | -1.11357 | -1.02052 | -0.88112 | -1.11566 | -1.33828 | -1.25391 | -1.22436 | -0.89849 | -0.75851 | -0.56972 | 0.1161   | 0.57686  | 0.5676   | 0.77625  | 0.4395   | 0.73043  | 0.53745  | 0.45744  | 0.08793  | -0.132   | -0.61458 | -0.62354 |
| MAL13P1.118    | -0.06722 | -0.58765 | -0.70326 | -1.18879 | -1.19414 | -1.28492 | -1.29551 | -1.59248 | -1.78249 | -1.98155 | -1.81894 | -1.81802 | -1.24066 | -0.71418 | 0.12126  | 0.79739  | 0.97129  | 0.77841  | 1.01984  | 0.65493  | 0.49652  | 0.38913  | 0.14586  | -0.2995  |
| PFD1035w       | -0.89278 | -0.66952 | -0.63561 | -0.15016 | 0.28491  | 0.3989   | 0.6804   | 0.72997  | 0.81758  | 0.86294  | 0.95396  | 0.60122  | 0.63064  | 0.38556  | 0.21889  | 0.13485  | -0.08608 | -0.03782 | -0.00532 | -0.01082 | 0.08807  | -0.0334  | -0.04287 | -0.05996 |
| PF08_0021      | -0.48574 | -0.60236 | -0.50989 | -0.6235  | -0.8672  | -0.68843 | -0.70434 | -0.52555 | -0.88797 | -0.49057 | -0.19632 | -0.10045 | -0.34329 | 0.38734  | 0.74159  | 0.77051  | 0.44968  | 0.53174  | 0.43363  | 0.11475  | -0.15521 | -0.31091 | -0.29166 | -0.33119 |
| MAL8P1.203     | -0.71316 | -0.96989 | -1.01276 | -1.30838 | -1.47042 | -1.57879 | -1.74115 | -1.94994 | -1.85434 | -1.54861 | -1.29611 | -1.09516 | -0.53777 | 0.09017  | 0.65994  | 0.92964  | 0.91776  | 0.96136  | 0.67988  | 0.69297  | 0.47899  | 0.03254  | -0.25032 | -0.78411 |
| PF10_0347      | 0.28458  | 0.10805  | -0.89814 | -0.41767 | -0.88797 | -1.13006 | -1.31276 | -1.37    | -1.69776 | -1.75371 | -1.99858 | -2.00132 | -1.55312 | -1.04766 | -0.17144 | 0.63914  | 0.98633  | 0.87839  | 1.60195  | 1.22501  | 1.14477  | 0.93874  | 0.56807  | 0.03986  |
| PFC0262c       | -0.35784 | -0.66716 | -0.65091 | -1.05851 | -1.12938 | -1.34828 | -1.49169 | -1.43507 | -1.46404 | -0.95647 | -0.19554 | -0.02341 | 0.07806  | 0.36241  | 0.42592  | 0.4324   | 0.49844  | 0.74117  | 0.47151  | 0.11062  | -0.07282 | -0.01466 | -0.16649 |          |
| PF14_0090      | -0.68353 | -0.80843 | -0.40406 | -0.75521 | -0.60098 | -0.76674 | -0.6327  | -0.78146 | -1.07233 | -1.26872 | -1.07944 | -0.94981 | -0.70423 | -0.28232 | 0.54366  | 0.57167  | 0.55934  | 1.07248  | 0.46678  | 0.41716  | -0.0694  | -0.14776 | -0.22554 |          |
| PF11_0259      | -0.06296 | 0.18462  | 0.13278  | 0.49906  | 0.45447  | 0.52231  | 0.64134  | 0.71887  | 0.73735  | 0.61774  | 0.64373  | 0.4245   | 0.28542  | -0.57763 | -0.15554 | -0.43634 | -0.71595 | -0.70565 | -0.53443 | -0.79682 | -0.70807 | -0.35147 | -0.16711 | 0.20798  |
| PF14_0481      | 0.3669   | 0.65204  | 0.71402  | 1.04989  | 1.22936  | 1.4268   | 1.228    | 1.388    | 1.11024  | 1.0341   | 1.01578  | 0.77185  | 0.44248  | 0.13816  | 0.11157  | -0.16369 | -0.40954 | -0.56011 | -0.31105 | -0.58674 | -0.51271 | -0.44128 | -0.28305 | 0.21507  |
| PFL0170w       | -0.75403 | -0.93581 | -1.02881 | -1.32655 | -1.23965 | -1.52458 | -1.35907 | -1.14868 | -0.80497 | -0.4633  | -0.32189 | -0.14538 | 0.11879  | 0.297    | 0.28654  | 0.31187  | 0.60005  | 0.54691  | 0.20385  | 0.31008  | 0.07072  | -0.10729 | -0.2597  | -0.62806 |
| PF1475w        | 0.21479  | -0.74988 | -1.43279 | -1.98295 | -2.53566 | -3.0056  | -3.44197 | -4.38291 | -4.82338 | -5.39714 | -5.53951 | -4.88017 | -3.30053 | -1.65245 | -0.92247 | -0.37278 | 0.1681   | 0.23036  | 0.65343  | 1.71896  | 1.09419  | 0.52718  | 1.14367  | 0.48378  |
| MAL8P1.127     | -0.08074 | 0.05485  | 0.32593  | 0.3544   | 0.28846  | 0.50431  | 0.50741  | 0.38607  | 0.71378  | 0.59491  | 0.4726   | 0.61407  | 0.60451  | 0.56598  | 0.19764  | -0.01476 | -0.11415 | -0.18579 | -0.66121 | -0.50371 | -0.37606 | -0.26148 | -0.18695 | -0.19863 |
| PF11_0345      | 0.48494  | 0.00015  | -0.27203 | -0.3876  | -0.51646 | -0.42079 | 0.01921  | -0.06518 | 0.27876  | 0.40444  | 0.4801   | 0.70422  | 0.63302  | 0.49147  | 0.35945  | 0.33926  | 0.10491  | 0.05841  | 0.56114  | 0.16724  | 0.38142  | -0.05148 | 0.22019  | 0.35355  |
| PFL0615w       | 0.41986  | 0.47101  | 0.2977   | 0.28238  | 0.42106  | 0.38788  | 0.31099  | 0.48095  | 0.9298   | 0.4639   | 0.74532  | 0.55499  | 0.45834  | 0.24343  | 0.45565  | 0.45704  | 0.32908  | 0.36831  | 0.27529  | 0.09387  | 0.11138  | 0.29335  | 0.20433  | -0.01012 |
| MAL8P1.95      | -0.01471 | 0.28182  | 0.14086  | 0.44448  | 0.80038  | 0.49181  | 1.03203  | 1.73808  | 1.72375  | 1.82893  | 1.49283  | 1.31802  | 0.62968  | 0.01658  | -0.59796 | -1.03397 | -1.51796 | -1.37796 | -1.11611 | -0.95214 | -0.42241 | -0.14015 | -0.08692 | 0.4975   |
| PFI0800c       | 0.38844  | 0.03742  | -0.262   | -0.49724 | -0.77301 | -0.72438 | -1.02222 | -0.91309 | -1.22018 | -1.24597 | -1.00183 | -1.11929 | -0.70686 | -0.24144 | 0.40091  | 0.89702  | 0.35485  | 0.89191  | 1.32444  | 0.69701  | 0.62099  | 0.17039  | -0.09112 | -0.33369 |
| PFI0510c       | 0.37923  | 0.18598  | -0.69805 | 0.23375  | 0.30836  | 0.45394  | 0.08057  | 0.03029  | -0.09356 | -0.16251 | -0.30617 | -0.30165 | -0.29068 | -0.18706 | -0.20517 | 0.14878  | 0.11843  | 0.48652  | 0.49132  | 0.401    | 0.40949  | -0.47195 | 0.50062  |          |
| PF11_0468      | -0.23343 | -0.31971 | -0.87507 | -0.17772 | -0.2626  | -0.32755 | -0.30418 | -0.46542 | -0.77465 | -0.6498  | -0.44406 | -0.206   | 0.12898  | 0.32139  | 0.73265  | 0.86229  | 0.83526  | 0.66602  | 0.62603  | 0.53536  | 0.29046  | 0.07216  | -0.09888 | -0.20652 |
| MAL7P1.67      | -0.06715 | -0.22692 | -0.06987 | 0.17323  | 0.51671  | 0.67953  | 0.45849  | 0.60672  | 0.39155  | 0.1809   | 0.30677  | 0.16118  | 0.18697  | 0.27496  | 0.46733  | 0.53179  | 0.9507   | 0.21421  | 0.40601  | 0.27109  | 0.17884  | -0.33751 | -0.31159 | -0.31083 |
| MAL4_trNA_Ser1 | 0.73093  | 0.97811  | -0.24863 | 0.11191  | 0.54418  | 0.41605  | 0.37727  | 1.29285  | 0.93184  | 0.46544  | 1.30809  | 1.10198  | -0.32545 | -1.1067  | -0.89275 | -0.79626 | -1.45422 | 0.29993  | 0.48961  | 0.49639  | 0.15716  | 0.48986  | 0.36761  | 0.29312  |
| PFF0505c       | -0.16846 | 0.0764   | 0.40011  | 0.28323  | 0.22431  | 0.28675  | 0.31023  | 0.1861   | 0.38894  | 0.62229  | 0.64007  | 0.56495  | 0.50067  | 0.60457  | 0.19428  | -0.16802 | -0.34273 | -0.19855 | -1.2647  | -0.92782 | -0.85028 | -0.60921 | -0.46726 | -0.35521 |
| PF14_0335      | -0.38494 | -0.08242 | 0.27978  | 0.25324  | 0.38194  | 0.45629  | 0.23775  | 0.56086  | 0.28525  | 0.34302  | 0.58595  | 0.57763  | 0.5733   | 0.2826   | 0.37127  | 0.19374  | -0.10988 | -0.17551 | -0.14956 | -0.78315 | -1.05738 | -0.71573 | -0.4849  | -0.42122 |
| PFE1430c       | 0.80895  | 0.84321  | -0.33059 | 1.29127  | 1.13346  | 1.36547  | 0.99139  | 1.092    | 1.03468  | 0.57765  | 0.62861  | 0.61202  | 0.41971  | 0.34356  | 0.34967  | 0.26968  | -0.17445 | -0.09842 | 0.29459  | -0.27497 | -0.25476 | 0.11238  | 0.29715  | 0.45853  |
| PFC0675c       | -0.33325 | -0.34055 | -0.43282 | -0.13072 | -0.3482  | -0.18675 | -0.31845 | -0.26806 | -0.1482  | -0.06694 | 0.17185  | 0.43278  | 0.33959  | 0.34853  | 0.31249  | 0.25419  | 0.31323  | 0.0151   | 0.18467  | -0.02905 | -0.12291 | 0.03746  | -0.08122 |          |
| PF14_0270      | -1.02347 | -0.88993 | -0.96643 | -0.8493  | -0.81468 | -0.58808 | -0.55534 | -0.74442 | -0.67167 | -0.42969 | -0.25862 | -0.00133 | 0.33392  | 0.65448  | 0.87653  | 0.78084  | 0.64035  | 0.62074  | 0.1808   | 0.06322  | -0.28557 | -0.61599 | -0.90486 | -1.00188 |
| PF13_0118      | -0.98522 | -0.85911 | -0.75159 | -0.74486 | -0.46804 | -0.32934 | -0.15321 | 0.13728  | 0.51383  | 0.70034  | 0.9455   | 1.08193  | 0.99457  | 0.80952  | 0.70759  | 0.54186  | 0.05302  | 0.09792  | -0.2416  | -0.58201 | -0.76789 | -0.88738 | -0.97963 | -0.93758 |
| MAL8P1.142     | -1.07747 | -1.0457  | -0.57471 | -0.83083 | -0.72003 | -0.42977 | -0.46299 | -0.39361 | -0.26722 | -0.15039 | 0.04666  | 0.09414  | 0.16814  | 0.27017  | 0.48548  | 0.62965  | 0.15418  | 0.16231  | -0.31898 | -0.52613 | -0.92706 | -1.03592 | -1.10589 |          |
| PF13_0133      | -0.66346 | -0.22912 | -0.10104 | 0.01799  | 0.32775  | 0.32909  | 0.35733  | 0.35821  | 0.07287  | 0.0172   | 0.09212  | 0.22084  | 0.1991   | 0.32325  | 0.54665  | 0.4421   | 0.17989  | 0.09542  | -0.20695 | -0.40882 | -0.75347 | -0.80906 | -0.91977 | -0.70485 |
| PF08_0063      | -0.72696 | -0.70946 | -0.65292 | -0.6649  | -0.32867 | -0.18333 | -0.00124 | 0.15943  | 0.43374  | 0.70599  | 0.83419  | 0.83415  | 0.88449  | 0.72793  | 0.33238  | 0.08831  | -0.08253 | -0.53304 | -0.35966 | -0.58036 | -0.53058 | -0.43376 | -0.47289 | -0.27264 |
| PFL2425w       | -0.8547  | -0.82666 | -0.47576 | -0.77608 | -0.81073 | -0.34663 | -0.14241 | 0.29607  | 0.27804  | 0.24845  | 0.65282  | 0.4954   | 0.67292  | 0.54629  | 0.84119  | 0.62139  | -0.0482  | 0.27798  | 0.37802  | -0.21533 | -0.38845 | -0.49604 | -0.46425 | -0.46981 |
|                |          |          |          |          |          |          |          |          |          |          |          |          |          |          |          |          |          |          |          |          |          |          |          |          |













|            |          |          |          |          |          |          |          |          |          |          |          |          |          |          |          |          |          |          |          |          |          |          |          |          |
|------------|----------|----------|----------|----------|----------|----------|----------|----------|----------|----------|----------|----------|----------|----------|----------|----------|----------|----------|----------|----------|----------|----------|----------|----------|
| PF14 0030  | 0.34408  | 0.52256  | 0.68185  | 0.75322  | 0.7814   | 0.22808  | 0.91517  | 0.65236  | 0.42697  | 0.53554  | 0.39291  | 0.35106  | 0.39766  | 0.29621  | -0.06683 | -0.30565 | -0.05399 | -0.07719 | -0.11978 | 0.11724  | 0.30476  | 0.46886  | 0.65148  | 0.52712  |
| PFE0580w   | 0.13401  | 0.07668  | 0.37237  | -0.01495 | 0.09995  | 0.01289  | -0.1352  | 0.02494  | -0.16786 | -0.16182 | 0.20457  | 0.0395   | 0.0173   | -0.41658 | 0.01036  | 0.17482  | 0.29542  | -0.04102 | 0.46232  | 0.21376  | 0.2094   | 0.10273  | 0.01571  | -0.21107 |
| PFC0250c   | -0.80433 | -0.96469 | -1.08161 | -1.57168 | -1.71682 | -1.8743  | -2.03698 | -2.04497 | -1.7461  | -1.29533 | -0.75505 | -0.12151 | 0.20302  | 0.36785  | 0.83019  | 0.99543  | 0.66074  | 0.68151  | 0.76578  | 0.3772   | 0.0526   | -0.20833 | -0.40491 | -0.91714 |
| PF13 0270  | 0.95801  | 1.04856  | 1.11262  | 1.06433  | 1.37542  | 1.27624  | 0.87796  | 0.79945  | 0.54159  | 0.24291  | 0.07845  | -0.03375 | -0.57438 | -0.85726 | -1.15388 | -1.31749 | -1.57041 | -1.31698 | -0.21102 | 0.21007  | 0.45513  | 0.06336  | 0.61494  | 0.75462  |
| PF10 0134  | -0.16746 | -0.00952 | -0.03226 | 0.23247  | 0.29489  | 0.53827  | 0.44747  | 0.72148  | 0.42575  | 0.40019  | 0.69496  | 0.53176  | 0.64213  | 0.45196  | 0.59825  | 0.44929  | -0.00789 | 0.21012  | 0.43354  | -0.05404 | -0.2061  | -0.33425 | -0.36585 | -0.08982 |
| MAL5 ITS1  | -0.3365  | -0.23605 | 0.62411  | 0.39451  | 0.87959  | 0.73312  | 0.90687  | 1.49706  | 1.45776  | 0.3422   | 1.00022  | 1.70746  | -0.13181 | -0.19391 | -0.02697 | -0.01849 | -1.44622 | -0.64742 | 0.87412  | 0.21701  | -0.71488 | -0.4322  | -0.037   | 0.51373  |
| PF07 0123  | 0.65685  | 0.76133  | 0.8102   | 0.74808  | 0.79456  | 0.73876  | 0.59092  | 0.80305  | 0.67894  | 0.64796  | 0.60579  | 0.40358  | 0.35105  | 0.0114   | -0.06333 | -0.32156 | -0.62351 | -0.4883  | 0.37314  | 0.03972  | 0.21112  | 0.23927  | 0.44631  | 0.80672  |
| PF11 0524  | -0.13675 | -0.12674 | -0.06375 | -0.07353 | -0.08538 | 0.05393  | 0.01513  | 0.2028   | 0.1395   | -0.01333 | 0.29493  | 0.43147  | 0.45071  | 0.25708  | 0.33679  | 0.35556  | -0.2053  | 0.14249  | 0.40168  | -0.16804 | -0.25144 | -0.22658 | -0.25492 | -0.27067 |
| PFB0953w   | -1.24837 | -1.08011 | -0.77104 | -0.24393 | 0.0698   | 0.31326  | 1.03413  | 1.93211  | 1.90937  | 1.85523  | 1.87093  | 1.63686  | 0.97079  | 0.2081   | 0.06671  | -0.24576 | -0.52948 | -0.9075  | -1.05497 | -1.56887 | -2.07389 | -2.23573 | -2.12419 | -1.82754 |
| PFF0835w   | -1.11535 | -0.3815  | -0.12898 | -0.147   | -0.05064 | -0.09605 | -0.05363 | -0.06647 | -0.09853 | -0.0493  | -0.03757 | -0.01177 | 0.15647  | 0.30611  | 0.15125  | -0.00758 | -0.2302  | -0.32036 | -1.19321 | -1.26206 | -1.30791 | -1.38494 | -1.36252 | -1.28474 |
| MAL7P1.22  | 1.73963  | 1.40371  | 0.89813  | 1.14712  | 1.03191  | 0.37012  | -0.08984 | -0.16485 | -0.51226 | -0.50076 | -0.66006 | -0.69393 | -0.89066 | -0.90586 | -1.23006 | -1.47257 | -1.5883  | -1.50523 | 0.90019  | 1.23984  | 0.97984  | 1.50536  | 1.82047  |          |
| PF14 0313  | 0.123    | 0.311    | -0.32613 | 0.38946  | 0.56587  | 0.31373  | 0.47337  | 0.62751  | 0.60828  | 0.46632  | 0.43262  | 0.31737  | 0.2731   | 0.10927  | -0.02779 | -0.11455 | 0.02175  | 0.16871  | 0.0889   | 0.35918  | 0.54025  | 0.41358  | 0.45358  | 0.5526   |
| PFL1630c   | -0.40236 | -0.56214 | -0.86063 | -0.68575 | -0.94451 | -1.00652 | -1.06287 | -0.92845 | -0.57752 | -0.20656 | 0.37976  | 0.53474  | 0.41603  | 0.37868  | 0.60971  | 0.56868  | 0.15984  | 0.60557  | 0.1843   | -0.24029 | -0.49007 | -0.31164 | -0.63863 | -0.68074 |
| PFL0770w   | -0.89052 | -0.82792 | -0.6542  | -0.6569  | -0.5249  | -0.23373 | -0.12966 | 0.11517  | 0.5537   | 0.50129  | 0.49401  | 0.58349  | 0.57094  | 0.59881  | 0.39225  | 0.18369  | 0.29458  | 0.13285  | -0.35833 | -0.11967 | -0.37286 | -0.75974 | -0.74164 | -0.90551 |
| PFC0420w   | 0.98199  | 1.16352  | 0.39251  | 0.41521  | 0.82808  | 1.2683   | 1.18756  | 1.61425  | 0.57288  | -0.03407 | 0.33022  | -0.02534 | -0.1267  | -0.09558 | 0.12437  | 0.079    | 0.2045   | 0.15399  | 0.1987   | -0.00054 | 0.16779  | 0.32144  | 0.45262  | 0.35498  |
| PF11 0209  | -0.00608 | -0.35565 | -0.29102 | -0.42026 | -0.44049 | -0.41464 | -0.38914 | -0.27556 | -0.51527 | -0.67276 | -0.33782 | -0.41055 | -0.49912 | -0.40709 | 0.11492  | 0.37491  | 0.46866  | 0.12343  | 0.85902  | 0.57218  | 0.31073  | 0.03242  | 0.08926  | 0.13005  |
| PF10 0373  | -0.28062 | -0.07504 | 0.33621  | 0.78101  | 1.09718  | 0.36934  | 1.0605   | 1.22787  | 1.1898   | 1.27648  | 1.04067  | 0.98609  | 0.63653  | 0.60112  | 0.11319  | 0.01824  | -0.18807 | -0.10831 | -0.20437 | -0.51019 | -0.62637 | -0.48563 | -0.4604  | -0.45126 |
| PF10 0316  | -0.59254 | -0.98404 | -1.2788  | -1.17954 | -1.36758 | -1.39289 | -1.52314 | -1.29179 | -0.76969 | -0.26129 | 0.10194  | 0.42659  | 0.55636  | 0.5731   | 0.69379  | 0.68679  | 0.5416   | 0.49013  | 0.49973  | 0.12497  | -0.14492 | -0.59328 | -0.65743 | -0.75309 |
| PFI1050c   | -0.54753 | -0.97759 | -0.78577 | -0.76382 | -0.33099 | -0.81056 | -0.14477 | -0.98876 | -0.32497 | 0.47061  | 0.63064  | 0.6643   | 0.83864  | 0.64565  | 0.57758  | 0.46836  | 0.56109  | 0.03587  | 0.14213  | -0.34578 | -0.63417 | -0.08119 | -0.45032 | -0.23433 |
| PFE0230w   | -0.1834  | 0.13219  | 0.14951  | 0.17571  | 0.47439  | 0.63893  | 0.93924  | 0.4992   | 0.46383  | 0.62232  | 0.33043  | 0.33893  | 0.50427  | 0.63591  | 0.33174  | 0.18264  | 0.27027  | 0.22591  | -0.38757 | 0.19906  | 0.19717  | 0.32755  | 0.35665  | 0.40894  |
| PFF0210w   | 0.67561  | 0.32555  | 0.16269  | -0.07971 | -0.34674 | -0.22704 | -0.20437 | -0.37381 | 0.00943  | 0.34283  | 0.34007  | 0.57855  | 0.44532  | 0.42721  | 0.12672  | 0.21549  | 0.07287  | 0.27971  | 0.61585  | 0.51169  | 0.51461  | 0.2337   | 0.22313  | 0.30279  |
| PFL1760w   | 0.39008  | 0.43307  | 0.43972  | 0.80636  | 0.70228  | 0.58736  | 0.38245  | 0.21427  | -0.12228 | -0.41365 | -0.4057  | -0.44093 | -0.22546 | -0.08501 | 0.2147   | 0.27114  | 0.07419  | 0.14387  | 0.24695  | 0.10235  | -0.17704 | -0.22069 | -0.0749  | 0.22728  |
| PFI1810w   | -1.6491  | -1.71189 | -1.96328 | -1.65639 | -1.67946 | -1.68212 | -1.54785 | -1.39596 | -1.67453 | -1.66083 | -1.38887 | -1.56681 | -1.3357  | -1.38206 | -1.64748 | -1.66465 | -1.67461 | -1.70029 | -1.61574 | -1.49768 | -1.60781 | -2.08409 | -1.69886 | -1.94412 |
| PFI1495w   | 0.12366  | 0.46804  | 0.58353  | 0.73791  | 0.84836  | 0.85335  | 0.86118  | 1.09282  | 1.19316  | 1.15008  | 1.026    | 1.06042  | 0.41734  | 0.17999  | -0.08634 | -0.39048 | -0.66908 | -0.68921 | -0.9877  | -1.01733 | -0.98232 | -0.53183 | -0.38029 | 0.02277  |
| MAL7P1.99  | -0.55388 | -0.2494  | -0.44602 | -0.06488 | -0.16879 | -0.23578 | -0.38473 | -0.22773 | -0.37198 | -0.41096 | 0.14112  | 0.19979  | 0.50329  | 0.4292   | 0.66212  | -0.48739 | 0.7549   | 0.24512  | 0.23172  | 0.05397  | -0.07719 | -0.19785 | 0.00943  | -0.06655 |
| PFF0285c   | -0.50584 | -0.22672 | -0.49647 | -0.26587 | -0.35823 | -0.73376 | -0.74632 | -0.53989 | -0.18628 | 0.14229  | 0.33441  | 0.45721  | 0.70556  | 0.80046  | 0.69729  | 0.36743  | 0.38813  | 0.07219  | -0.60117 | -0.18    | -0.17774 | -0.41606 | -0.1433  | -0.04245 |
| PF14 0316  | 1.22662  | 0.80073  | 0.4036   | 0.53828  | 0.26546  | -0.03146 | -0.34962 | -0.65087 | -0.98453 | -1.35027 | -1.38661 | -1.19907 | -1.11669 | -0.99937 | -0.82708 | -0.89185 | -0.92198 | -0.67059 | -0.00047 | 0.53999  | 0.7478   | 0.8206   | 0.8634   | 0.89626  |
| PFL0255c   | -0.11857 | 0.13192  | 0.33889  | 0.56706  | 0.57437  | 0.93655  | 0.96221  | 1.10645  | 1.24983  | 1.16604  | 1.18764  | 1.08527  | 0.75731  | 0.47219  | 0.33676  | 0.09289  | -0.16021 | -0.30906 | -0.23752 | -0.42377 | -0.23911 | -0.24719 | -0.18021 | -0.07975 |
| PF08 0064  | -0.45853 | -0.4096  | -0.54332 | -0.86293 | -0.85957 | -0.93197 | -1.00249 | -1.13429 | -1.51147 | -1.4726  | -1.31275 | -1.07053 | -0.5733  | -0.13997 | 0.60903  | 0.83849  | 0.78575  | 0.53886  | 0.85186  | 0.49266  | 0.27313  | -0.38428 | -0.38929 | -0.51155 |
| PFL2565w   | 1.8947   | 2.21549  | 1.9932   | 1.95029  | 1.68958  | 0.99431  | 0.79315  | 0.74784  | -0.17101 | -0.66516 | -1.22887 | -1.77492 | -2.21498 | -2.53475 | -2.7253  | -2.89918 | -2.64764 | -2.83612 | -1.95432 | -0.89806 | 0.31191  | 0.88746  | 1.13001  | 1.41786  |
| PFL1435c   | 0.64427  | -0.08115 | -0.25045 | -0.79566 | -1.25538 | -1.50323 | -1.98172 | -2.30581 | -2.83419 | -3.047   | -3.10281 | -3.39955 | -3.55948 | -3.71405 | -2.99821 | -1.73525 | 0.05222  | 0.45238  | 1.23217  | 1.14927  | 1.23146  | 1.27475  | 1.15388  | 0.71908  |
| PFB0550w   | -0.15665 | 0.0382   | 0.03115  | 0.18996  | 0.11374  | 0.20465  | 0.33397  | 0.57791  | 0.61539  | 0.55573  | 0.77207  | 0.70859  | 0.73574  | 0.32392  | 0.30576  | -0.11889 | -0.60597 | -0.73551 | -0.85305 | -0.89205 | -0.87937 | -0.68456 | -0.43274 | -0.33469 |
| PF14 0325  | 0.63947  | 0.1541   | -0.12062 | -0.04219 | -0.06906 | -0.36403 | -0.40261 | -0.83688 | -0.81075 | -0.88692 | -1.12161 | -0.98746 | -0.96802 | -0.99526 | -1.00846 | -0.59251 | -0.17103 | 0.15246  | 0.31101  | 0.80692  | 0.97784  | 0.55852  | 0.90522  | 0.88977  |
| PFE0725c   | 0.5013   | 0.5331   | -0.79888 | 1.03259  | 1.41031  | 1.27245  | 1.2233   | 1.23006  | 0.26294  | 0.34593  | 0.50925  | 0.33452  | 0.34722  | 0.12384  | 0.19644  | 0.11121  | 0.06912  | 0.02552  | 0.75703  | 0.56299  | 0.6849   | 0.53822  | 1.04318  | 1.33738  |
| PF07 0006  | 2.0974   | 1.30727  | 2.42211  | 1.9042   | 2.17371  | 2.08909  | 2.10195  | 1.11489  | 1.12587  | 0.33551  | -0.43801 | -0.8342  | -1.31019 | -1.80057 | -1.79634 | -2.27672 | -4.56931 | -2.49589 | -1.60333 | -0.4254  | 0.5596   | 1.38436  | 1.53872  | 1.80058  |
| MAL13P1.66 | 0.27078  | 0.28314  | 0.652    | 0.69788  | 0.72293  | 0.3439   | 0.65128  | 0.47999  | 0.9059   | 0.93364  | 0.67444  | 0.65732  | 0.36595  | 0.25463  | -0.11629 | -0.23334 | 0.157863 | -0.26165 | -0.6372  | -0.11688 | 0.12912  | 0.40085  | 0.16287  | 0.27604  |
| PF11 0348  | -0.46212 | -0.64167 | -0.39897 | -0.66039 | -0.53995 | -0.54021 | -0.52599 | -0.44008 | -0.35157 | -0.33896 | -0.07389 | 0.15996  | 0.13667  | 0.18874  | 0.32193  | 0.35068  | 0.43874  | 0.24325  | 0.25525  | 0.04299  | -0.13861 | -0.50965 | -0.42319 | -0.58868 |
| PFI0675w   | 0.5023   | -0.13722 | -0.16779 | -0.7467  | -0.77044 | -1.38233 | -1.68937 | -2.08476 | -2.62689 | -2.98724 | -3.0393  | -3.38026 | -3.72232 | -3.47815 | -3.22718 | -3.02145 | -1.77801 | -0.6862  | 1.55259  | 0.99457  | 1.09968  | 0.99623  | 1.12542  | 1.57885  |
| PF10 0306  | 0.4479   | -0.01039 | -0.45339 | -0.98446 | -1.42814 | -1.64416 | -1.93758 | -2.22656 | -2.6987  | -3.07512 | -3.30282 | -3.63456 | -3.57677 | -3.17789 | -1.661   | -0.04622 | 0.74524  | 1.19145  | 1.33665  | 1.14119  | 1.24348  | 0.96181  | 0.62231  | 0.01578  |
| PF10 0126  | 0.08962  | 0.07468  | 0.0837   | 0.19552  | 0.20685  | 0.20818  | 0.15442  | 0.36281  | 0.47837  | 0.24724  | 0.35235  | 0.38106  | 0.18591  | -0.2478  | -0.32416 | -0.39806 | -0.20368 | -0.90174 | -0.30214 | -0.22217 | -0.17724 | -0.14465 | 0.17281  | 0.29849  |
| PFI1625c   | -0.69388 | -0.50042 | -0.43308 | -0.31976 | -0.18004 | 0.03415  | 0.01929  | 0.19958  | 0.4196   | 0.62381  | 1.01272  | 0.9006   | 1.03549  | 0.73355  | 0.79856  | 0.5465   | -0.03021 | -0.05417 | 0.03597  | -0.67369 | -0.77266 | -0.69668 |          |          |

|             |          |          |          |          |          |          |          |          |          |          |          |          |          |          |          |          |          |          |          |          |          |          |          |          |
|-------------|----------|----------|----------|----------|----------|----------|----------|----------|----------|----------|----------|----------|----------|----------|----------|----------|----------|----------|----------|----------|----------|----------|----------|----------|
| PFA0160c    | -1.54815 | -1.39022 | -0.84104 | -1.17482 | -1.01118 | -0.79999 | -0.41474 | 0.03027  | 0.34494  | 0.62362  | 0.80358  | 0.76741  | 0.76388  | 0.4906   | 0.52075  | 0.03847  | -0.40841 | -0.65042 | -0.82478 | -1.31871 | -1.48068 | -1.45677 | -1.41805 | -1.40885 |
| PF11_0265   | -0.27288 | 0.05235  | 0.46673  | 0.48503  | 0.512    | 0.7693   | 1.01232  | 1.30071  | 1.59448  | 1.587    | 1.55023  | 1.3503   | 0.76364  | 0.27061  | -0.19049 | -0.59059 | -1.14034 | -1.30058 | -1.58467 | -1.58632 | -1.36065 | -1.13073 | -0.92495 | -0.4912  |
| PF11_0186   | -0.56106 | -0.13847 | -0.47223 | 0.17652  | 0.30309  | 0.40876  | 0.31605  | 0.23593  | -0.19657 | 0.05475  | 0.03632  | -0.02487 | 0.14966  | 0.24489  | 0.55018  | 0.63569  | 0.47142  | 0.38398  | 0.77973  | 0.21032  | -0.08751 | 0.01936  | -0.07329 | -0.11489 |
| PFC0725c    | -1.07098 | -1.03359 | -0.58548 | -0.22646 | 0.29095  | 0.97128  | 0.99445  | 1.05125  | 0.6709   | 0.50667  | 0.51506  | 0.61539  | 0.58809  | 0.3916   | 0.27002  | 0.0056   | -0.46466 | -0.50806 | -0.77102 | -1.11239 | -1.46021 | -1.4241  | -1.33352 | -0.99989 |
| PFL1430c    | -0.48791 | -0.79809 | -1.2716  | -0.80502 | -1.00319 | -1.15044 | -1.19051 | -1.28926 | -0.99033 | -0.45473 | -0.41188 | -0.12502 | 0.36489  | 0.57013  | 0.43105  | 0.2422   | 0.6291   | 0.22498  | -0.27169 | 0.10519  | 0.20527  | -0.08356 | -0.21465 | -0.27147 |
| PF11110w    | 0.9194   | 0.86284  | 1.06204  | 1.43151  | 1.48153  | 1.64853  | 1.22912  | 1.20177  | 0.8108   | 0.34805  | 0.51932  | 0.47407  | 0.30293  | 0.24866  | 0.1732   | 0.14649  | -0.60023 | -0.22696 | 0.0998   | -0.2926  | -0.2273  | 0.02296  | 0.31494  | 0.28771  |
| PF14_0473   | 0.71521  | 0.91923  | 0.89499  | 0.88145  | 0.79135  | 0.74092  | 0.73928  | 0.75424  | 0.70723  | 0.67183  | 0.469    | 0.47572  | 0.33921  | 0.37119  | 0.13131  | -0.19014 | -0.32299 | -0.35696 | -0.76627 | -0.26021 | -0.0491  | 0.13111  | 0.33147  | 0.49845  |
| PFB0235w    | 0.17963  | 0.30614  | 0.50123  | 0.2014   | 0.23123  | 0.05561  | -0.01574 | -0.08438 | 0.09267  | 0.3709   | 0.63019  | 0.80608  | 0.6885   | 0.16638  | -0.05855 | 0.05454  | -0.08161 | -0.03256 | 0.19471  | 0.20871  | -0.37323 | 0.47188  | 0.40657  | 0.46972  |
| PFA0175w    | 0.39912  | -0.25219 | -0.5766  | -0.31109 | -0.10934 | -0.36362 | -0.25495 | 0.17761  | 0.36344  | 0.6866   | 0.54057  | 0.62127  | 0.53436  | 0.43276  | -0.01186 | -0.09664 | -0.22213 | 0.12048  | -0.19657 | 0.33677  | 0.42497  | 0.44114  | 0.37435  | 0.44739  |
| PF11_0039   | 1.51638  | 1.37434  | 2.27564  | 2.26539  | 2.32468  | 2.12698  | 1.53918  | -0.00792 | -0.68489 | -1.49644 | -1.85105 | -2.44068 | -3.19108 | -3.75196 | -4.03354 | -4.3014  | -3.41529 | -3.40089 | -1.15931 | 0.19259  | 0.84779  | 0.30926  | 1.96282  | 2.00636  |
| MAL8P1.200  | 0.7023   | 1.00053  | 0.34644  | 0.33468  | 0.35422  | 0.38432  | 0.3373   | 0.587    | 0.19152  | 0.4515   | 0.23519  | 0.08091  | -0.19609 | -0.25643 | -0.38438 | -0.13968 | -0.46627 | 0.23174  | 0.02575  | 0.029    | 0.23159  | 0.78902  | 0.40091  | 0.579    |
| PF13_0043   | 0.02258  | 0.24981  | 0.68113  | 0.68185  | 0.61155  | 0.39776  | 0.48349  | 0.25419  | 0.46677  | 0.33276  | 0.54602  | 0.44272  | 0.54655  | 0.45121  | 0.36158  | 0.23484  | 0.22208  | -0.03572 | 0.08634  | -0.28406 | -0.35312 | -0.30656 | -0.60452 | -0.25707 |
| PF10_0340   | -0.62464 | -0.27782 | -0.58421 | -0.46342 | -0.45479 | -0.81708 | -0.7923  | -1.04214 | -0.93937 | -0.32368 | 0.19445  | 0.36075  | 0.6992   | 0.62688  | 0.7409   | 0.55177  | 0.27245  | -0.1756  | -0.56269 | -1.08531 | -1.05166 | -0.86038 | -1.09591 | -0.9304  |
| MAL7P1.114  | -1.22206 | -1.13791 | -1.09612 | -1.29796 | -1.38191 | -1.25532 | -0.99946 | -0.82576 | -0.45538 | -0.20133 | 0.45525  | 0.51349  | 0.78395  | 0.61883  | 0.93181  | 0.75584  | 0.2338   | 0.4895   | 0.39785  | -0.19443 | -0.59422 | -0.86403 | -1.09012 | -1.20582 |
| PFI0855w    | -0.24236 | -0.41732 | -0.33845 | -0.43877 | -0.37165 | -0.45439 | -0.43141 | -0.26104 | 0.01001  | 0.12915  | 0.25266  | 0.37614  | 0.44716  | 0.64712  | 0.56908  | 0.62736  | 0.23561  | 0.43436  | 0.27514  | 0.11243  | 0.02152  | -0.16663 | -0.32861 | -0.45486 |
| PFD0100c    | 1.55117  | 0.73933  | 0.53945  | -0.03095 | -0.28808 | -0.80242 | -1.09744 | -1.47164 | -2.00372 | -2.60771 | -2.91357 | -3.30011 | -3.3971  | -3.05439 | -2.58209 | -2.29257 | -1.48454 | -0.46126 | 0.57414  | 1.2713   | 1.5254   | 1.51037  | 1.5497   | 1.54264  |
| PFI1005w    | 0.26094  | -0.48565 | -0.36384 | -0.10150 | -0.86082 | -1.61367 | -1.64061 | -1.82644 | -2.58162 | -2.46454 | -2.33935 | -2.33342 | -1.96031 | -2.16603 | -1.57853 | -0.99556 | -0.44981 | 0.06467  | 1.55412  | 0.79599  | 0.78754  | 0.6357   | 0.7618   | 0.90036  |
| PF10_0041   | 0.23842  | 0.62481  | 0.90335  | 0.73594  | 0.9667   | 1.036    | 0.8006   | 0.5186   | 1.0282   | 0.97092  | 0.77154  | 0.65484  | 0.94201  | 0.4501   | 0.38988  | -0.19203 | -0.20639 | -0.53393 | -0.77946 | -0.56366 | -0.86702 | -0.56616 | -0.23359 | 0.07211  |
| PF10_0048   | -0.64144 | -0.86587 | -0.90468 | -1.12493 | -1.08889 | -1.28918 | -1.21686 | -1.17023 | -1.14331 | -0.83332 | -0.56423 | -0.27614 | -0.3191  | -0.15558 | 0.15285  | 0.48812  | 0.32671  | 0.67862  | 0.99078  | 0.58701  | 0.42761  | -0.08777 | -0.11505 | -0.37233 |
| MAL13P1.313 | -0.25655 | -0.23616 | -0.9031  | -0.13231 | 0.0698   | 0.11109  | 0.10453  | 0.00938  | -0.01502 | 0.06905  | -0.26818 | -0.30565 | -0.07829 | 0.20791  | -0.01397 | -0.1187  | 0.3329   | 0.3832   | -0.83507 | 0.48705  | 0.57751  | 0.89898  | 0.76956  | 0.87697  |
| MAL8P1.70   | 0.64314  | -0.13098 | -0.6988  | -0.61737 | -0.43856 | -1.11058 | -1.29977 | -1.44282 | -2.12046 | -2.27106 | -2.37511 | -2.53983 | -2.82454 | -2.89989 | -2.75902 | -2.56601 | -1.39901 | -0.79935 | 1.56028  | 0.87576  | 1.18856  | 0.9056   | 1.2396   | 1.74558  |
| MAL8P1.82   | -0.47291 | -0.66391 | -0.64561 | -1.09982 | -1.17779 | -1.32357 | -1.22662 | -0.90302 | -1.22652 | -1.24345 | -1.17151 | -1.25322 | -0.79823 | -0.39194 | 0.13114  | 0.50278  | 0.80699  | 0.84597  | 0.3814   | 0.57641  | 0.59097  | 0.34507  | 0.04833  | -0.20814 |
| PFF0520w    | -0.66308 | -0.79812 | -0.74144 | -0.69128 | -0.53014 | -0.03841 | 0.11001  | 0.34636  | 0.5469   | 0.70709  | 0.75057  | 0.65637  | 0.56126  | 0.3504   | 0.41158  | 0.44719  | 0.35455  | 0.1652   | 0.33525  | 0.07162  | -0.09051 | -0.45356 | -0.48377 | -0.65337 |
| PF14_0441   | 0.28945  | 0.20899  | -1.22187 | 0.76555  | 0.46767  | 0.34178  | 0.32345  | 0.81193  | 0.48281  | 0.3048   | 0.39243  | 0.33052  | 0.29984  | 0.24471  | 0.29156  | 0.34981  | 0.34475  | 0.30866  | 0.34221  | 0.05475  | 0.16162  | 0.39161  | 0.25388  | 0.19136  |
| PF14_0468   | -0.07901 | -0.33926 | -0.225   | -0.46569 | -0.53335 | -0.59548 | -0.68477 | -0.7946  | -1.6246  | -1.23595 | -1.19646 | -1.06497 | -0.69966 | -0.39523 | 0.04041  | 0.51636  | 0.80741  | 0.87977  | 0.83827  | 0.71884  | 0.78535  | 0.61881  | 0.47701  | 0.00637  |
| PF14_0352   | -1.10387 | -1.50847 | -1.46898 | -1.6769  | -1.92777 | -1.75437 | -1.77183 | -1.65057 | -1.26884 | -0.73202 | -0.17089 | 0.31811  | 0.52699  | 0.53915  | 0.72337  | 0.78725  | 0.73226  | 0.45757  | 0.44108  | -0.00035 | -0.2222  | -0.53213 | -0.69127 | -1.07827 |
| PFF1115w    | 0.68426  | 0.93609  | -0.11743 | 1.17427  | 1.30002  | 1.49921  | 1.18818  | 1.55346  | 1.26562  | 1.08237  | 0.87303  | 1.03108  | 0.44167  | 0.2096   | 0.06855  | 0.03393  | -0.48241 | -0.18915 | -0.40816 | -0.53039 | -0.50903 | -0.24505 | -0.0254  | 0.17456  |
| PFI1440w    | -0.57902 | -0.27988 | -0.32906 | -0.30274 | -0.21378 | -0.27208 | -0.12048 | 0.05817  | -0.23125 | 0.03344  | 0.27228  | 0.30905  | 0.58007  | 0.57179  | 0.73066  | 0.529    | 0.51481  | 0.30614  | -0.00816 | -0.11625 | -0.11142 | -0.09829 | 0.03033  | 0.06196  |
| PFA0285c    | -0.55078 | -0.91776 | -1.07756 | -0.93921 | -0.94541 | -1.34228 | -1.49771 | -1.47538 | -1.49743 | -0.91182 | -0.4441  | -0.09699 | -0.08125 | 0.2543   | 0.47935  | 0.64341  | 0.72221  | 0.41382  | 0.67839  | 0.49106  | 0.44435  | -0.01699 | -0.37823 | -0.34885 |
| MAL8P1.27   | -0.59445 | -0.62179 | -0.76532 | -1.15188 | -1.00484 | -1.45766 | -1.08917 | -0.99842 | -0.93296 | -1.33095 | -0.28076 | -0.089   | 0.21167  | 0.37697  | 0.87971  | 0.95746  | 0.62961  | 0.39821  | 0.54169  | 0.21235  | 0.04741  | -0.57762 | -0.45046 | -0.74986 |
| PF14_0599   | -0.3449  | 0.53775  | 0.80153  | 1.10786  | 0.8438   | 1.23762  | 1.27984  | 0.97012  | 1.25869  | 1.08503  | 0.89706  | 0.88844  | 0.6127   | 0.51856  | 0.39374  | 0.21326  | -0.09095 | -0.27677 | -0.15975 | -0.53942 | -0.65826 | -0.31291 | -0.19148 | -0.03656 |
| PF14_0404   | 0.3952   | -0.06759 | 0.62903  | 0.49815  | 0.24582  | 0.41672  | 0.7489   | 0.41209  | 0.7968   | 0.71021  | 0.07989  | 0.14658  | 0.34345  | 0.35291  | 0.45428  | 0.33438  | 0.02422  | 0.19644  | 0.06038  | 0.1408   | 0.10518  | -0.03535 | 0.14262  | 0.05687  |
| PF11_0068   | 0.69116  | 0.61454  | 0.93785  | 0.82575  | 0.95397  | 1.08705  | 0.79239  | 0.89765  | 0.93466  | 0.85655  | 0.72531  | 0.50465  | 0.40779  | 0.17382  | -0.0573  | -0.1605  | -0.54988 | -0.48603 | -0.55016 | -0.40424 | -0.20251 | 0.05647  | 0.29427  | 0.50692  |
| PF1330c     | -0.32908 | -0.02155 | -0.0325  | -0.08692 | 0.1628   | 0.1558   | -0.0241  | -0.04949 | -0.19049 | -0.14576 | 0.23559  | 0.36284  | 0.33784  | 0.18237  | 0.22248  | 0.23902  | -0.0422  | 0.08676  | 0.40004  | 0.22404  | 0.19605  | 0.22807  | 0.43534  | 0.65348  |
| PF14_0280   | -0.38784 | -1.04672 | -0.93845 | -0.90758 | -1.04836 | -1.04148 | -0.70734 | 0.19835  | 0.51637  | 0.55009  | 0.83925  | 0.75767  | 0.66564  | 0.51443  | 0.32753  | 0.2571   | 0.05675  | -0.0478  | 0.22904  | -0.05283 | -0.0263  | -0.16095 | -0.31458 | -0.38511 |
| PFL0090c    | -0.5821  | -0.4142  | -0.40369 | -0.85135 | -1.07719 | -1.06571 | -0.95883 | -0.61896 | -0.21524 | 0.05392  | 0.17482  | 0.54536  | 0.73128  | 0.66706  | 0.76571  | 0.57087  | 0.38039  | 0.31114  | 0.30344  | 0.05496  | -0.41271 | -0.46304 | -0.51402 | -0.63118 |
| MAL8P1.103  | -0.46429 | -0.52645 | 0.20974  | -0.21744 | -0.16043 | 0.24845  | 0.38673  | 0.54103  | 0.49892  | 0.50599  | 0.55794  | 0.61647  | 0.54795  | 0.43377  | 0.33541  | 0.07192  | -0.28102 | -0.45651 | -0.38908 | -0.8786  | -0.83529 | -0.77455 | -0.71765 | -0.57616 |
| PFE0275w    | -0.07147 | 0.25643  | 0.44899  | 0.27091  | 0.5364   | 0.58891  | 0.58595  | 0.60592  | 0.60049  | 0.43315  | 0.46238  | 0.47357  | 0.40428  | 0.27359  | 0.38832  | 0.27187  | 0.16104  | -0.1287  | 0.24509  | -0.20828 | -0.1319  | -0.54808 | -0.44877 | -0.21065 |
| PFB0510w    | 0.30158  | -0.05017 | 0.12236  | -0.22982 | -0.26899 | -0.44704 | -0.55859 | -0.66316 | -0.70378 | -0.69031 | -0.40639 | -0.15101 | 0.12464  | 0.32836  | 0.34541  | 0.39799  | -0.46036 | 0.54474  | 0.55426  | 0.54744  | 0.60231  | 0.38742  | 0.35655  | 0.31486  |
| PF10_0130   | -0.15093 | -0.21697 | -0.00943 | 0.02435  | 0.17275  | 0.26414  | 0.24135  | 0.24226  | 0.37074  | 0.48695  | 0.41341  | 0.54498  | 0.58203  | 0.72715  | 0.59876  | 0.3494   | 0.30161  | -0.05324 | -0.02649 | -0.29894 | -0.39377 | -0.33337 | -0.43862 | -0.46735 |
| PFC0370w    | 0.45807  | 0.029    | -0.22588 | 0.36977  | 0.45122  | -0.01149 | -0.41    | -0.48287 | -1.57515 | -1.81703 | -1.52842 | -2.0771  | -2.27316 | -2.51259 | -2.01044 | -1.26938 | -0.22072 | -0.03463 | 1.14435  | 0.81434  | 0.       |          |          |          |

|                |          |          |          |          |          |          |          |          |          |          |          |          |          |          |          |          |          |          |          |          |          |          |          |          |
|----------------|----------|----------|----------|----------|----------|----------|----------|----------|----------|----------|----------|----------|----------|----------|----------|----------|----------|----------|----------|----------|----------|----------|----------|----------|
| PFC0155c       | 0.20333  | 0.4972   | 0.34687  | 0.59184  | 0.58275  | 0.42491  | 0.39979  | 0.62888  | 0.647    | 0.67904  | 0.73527  | 0.53142  | 0.52407  | 0.12804  | 0.11136  | -0.13927 | -0.56219 | -0.33016 | -0.37374 | -0.49056 | -0.38757 | -0.37098 | -0.04188 | 0.14509  |
| PF08_0034      | -0.749   | -0.46576 | -0.36676 | -0.41326 | -0.49102 | -0.4738  | -0.14844 | 0.0431   | 0.42284  | 0.43416  | 0.35092  | 0.41505  | 0.45766  | 0.46062  | 0.39053  | 0.11818  | 0.12379  | -0.20569 | -0.65269 | -0.67433 | -0.59822 | -0.63132 | -0.6156  | -0.52805 |
| PF11_0142      | 0.75104  | 0.59883  | 0.16074  | 0.46172  | 0.04192  | 0.29685  | 0.04064  | 0.36166  | 0.39605  | -0.14752 | 0.04883  | -0.168   | -0.09478 | -0.20777 | -0.10939 | -0.09317 | -0.36308 | -0.15396 | 0.67473  | 0.41035  | 0.4542   | 0.67888  | 0.75862  | 0.5521   |
| PFI0875w       | -1.70283 | -1.37653 | -1.11504 | -0.90591 | -0.5831  | -0.53337 | -0.62781 | -1.04054 | -1.21726 | -0.80167 | -0.69717 | -0.67372 | 0.09348  | 0.7042   | 0.59742  | 0.60332  | 0.35519  | 0.17082  | -0.39298 | -0.55475 | -0.92229 | -1.04347 | -1.67595 | -1.6751  |
| MAL13P1.170    | 0.33144  | 0.31408  | 0.5458   | 1.0484   | 1.11899  | 1.00863  | 1.07414  | 1.10612  | 1.00723  | 0.76275  | 0.72492  | 0.65229  | 0.43864  | 0.32166  | 0.00484  | -0.2077  | -0.37221 | -0.36963 | -0.28963 | -0.32937 | -0.15074 | -0.22432 | 0.05632  | 0.4248   |
| PFD0905w       | 0.80058  | 0.75306  | 0.43332  | 0.37524  | 0.10916  | 0.15518  | 0.27987  | 0.37646  | 0.11807  | 0.00498  | -0.16244 | -0.3511  | -0.90388 | -1.25712 | -1.45484 | -0.8981  | -0.44142 | 0.47533  | 0.67002  | 1.02262  | 0.8982   | 0.94596  | 0.9563   |          |
| PFA0320w       | -0.30688 | -0.62869 | -0.38505 | -0.68271 | -0.67542 | -0.61342 | -0.68502 | -0.81323 | -0.73178 | -0.48264 | -0.24827 | 0.07659  | 0.32659  | 0.57464  | 0.67384  | 0.68472  | 0.68687  | 0.61774  | 0.31263  | 0.40355  | 0.15784  | -0.11042 | -0.21555 | -0.26456 |
| PF13_0242      | -0.72865 | -0.67523 | -0.50237 | -0.2124  | -0.18647 | -0.07254 | -0.13277 | 0.026    | -0.03235 | 0.12373  | 0.42807  | 0.44243  | 0.68472  | 0.37687  | 0.47961  | 0.52713  | 0.25004  | 0.10848  | 0.54741  | -0.00154 | -0.33156 | -0.40244 | -0.37806 | -0.47292 |
| PF14_0700      | -1.17688 | -1.00315 | -0.68983 | -0.46115 | -0.16137 | 0.04874  | 0.07471  | 0.18215  | 0.14011  | 0.14125  | 0.32029  | 0.32582  | 0.41085  | 0.29905  | 0.54669  | 0.37691  | -0.04776 | -0.06763 | -0.17903 | -0.60193 | -0.52764 | -0.68919 | -0.692   | -0.42463 |
| PFE1285w       | 0.10249  | -0.73884 | -1.04197 | -1.20454 | -1.02968 | -2.04012 | -2.12741 | -2.44348 | -3.1573  | -3.5717  | -3.4488  | -3.65425 | -3.85192 | -4.23553 | -3.65615 | -2.81174 | -1.01846 | -1.34068 | 1.6217   | 1.30878  | 0.97914  | 0.34326  | 1.29517  | 2.0174   |
| MAL13P1.180    | -0.37136 | -0.46868 | -0.52925 | -0.62647 | -0.55883 | -0.3196  | -0.01444 | 0.05408  | 0.09972  | 0.27587  | 0.38838  | 0.63909  | 0.62266  | 0.89868  | 0.70096  | 0.46617  | 0.91483  | 0.39693  | 0.23474  | -0.05319 | -0.19554 | -0.26065 | -0.35952 |          |
| PF14_0685      | 0.40427  | 0.46233  | 0.33665  | 1.05445  | 0.90462  | 1.29536  | 1.1689   | 1.59966  | 0.82812  | 0.5337   | 0.6223   | 0.55365  | 0.33212  | 0.37387  | 0.31713  | 0.12272  | 0.1563   | 0.11828  | 0.2934   | 0.07985  | 0.4191   | 0.5225   | 1.00978  | 0.77144  |
| PF14_0736      | 0.15749  | 0.26705  | 0.13888  | 0.43625  | 0.75684  | 0.69489  | 0.6582   | 0.72891  | 0.75469  | 0.69877  | 0.4872   | 0.31788  | 0.35887  | 0.22516  | 0.04774  | 0.00664  | 0.05521  | 0.20963  | 0.00086  | 0.38366  | 0.5365   | 0.83481  | 1.07087  | 0.91182  |
| PF13_0033      | -0.85558 | -0.87768 | -0.70632 | -0.85163 | -1.01558 | -0.88733 | -0.62774 | -0.59716 | -0.1947  | 0.03879  | 0.01286  | 0.05153  | 0.17788  | 0.19794  | 0.64048  | 0.56679  | 0.5199   | 0.49737  | 0.06876  | 0.11788  | -0.3893  | -0.64618 | -0.82742 | -0.78913 |
| PF07_0048      | 0.51374  | 0.67307  | 0.34603  | 0.5249   | 0.8319   | 0.70991  | 0.76707  | 0.66602  | 0.5798   | 0.54745  | 0.37695  | 0.35735  | 0.38967  | 0.54056  | 0.30015  | 0.27035  | 0.34966  | 0.37326  | 0.15351  | 0.00851  | -0.14837 | -0.05785 | -0.28654 | -0.1867  |
| PFA0575c       | -0.34375 | -0.24213 | -0.36798 | -0.09859 | -0.23518 | -0.00197 | -0.05753 | 0.12851  | 0.44512  | 0.24607  | 0.34852  | 0.56153  | 0.47674  | 0.5703   | 0.61318  | 0.6967   | 0.44447  | 0.47649  | 0.73384  | 0.22254  | 0.0436   | -0.05256 | -0.26261 | -0.58418 |
| PFB0145c       | 0.55745  | 0.0199   | -0.46334 | -0.48893 | -0.88213 | -1.15759 | -1.3488  | -1.7825  | -1.10222 | -1.65877 | -1.72179 | -1.51935 | -1.17393 | -0.70158 | -0.58536 | -0.3849  | 0.16143  | 0.39296  | 0.40628  | 0.96641  | 1.05078  | 0.86851  | 0.95854  | 0.75009  |
| MAL7P1.6       | 2.08138  | 1.8974   | 1.47699  | 1.21941  | 0.83385  | 0.11725  | -0.35648 | -0.76224 | -1.63402 | -2.26725 | -2.5143  | -3.10849 | -3.19551 | -3.73988 | -3.55664 | -3.96862 | -3.86526 | -3.05071 | -1.46388 | 0.2127   | 0.74012  | 1.01352  | 1.82261  | 1.34233  |
| PF14_0288      | -0.21076 | -0.20287 | -0.40113 | -0.30397 | -0.36306 | -0.44032 | -0.49135 | -0.74697 | -0.97382 | -0.8462  | -0.48962 | -0.37151 | -0.13691 | -0.19971 | 0.40657  | 0.52296  | 0.54987  | 0.31963  | 0.87623  | 0.37331  | 0.52192  | 0.17922  | 0.15047  | 0.12668  |
| PFD0075w       | -1.28255 | -1.45321 | -1.70847 | -1.77272 | -1.93224 | -0.73052 | 0.52072  | 1.32071  | 2.26519  | 2.46271  | 2.15958  | 1.90489  | 1.16512  | 0.55929  | -0.05645 | -0.45802 | -1.65486 | -1.516   | -1.63827 | -1.86041 | -1.77544 | -1.95167 | -1.79347 | -2.14277 |
| PFC0735w       | -0.18129 | 0.29616  | 0.67106  | 0.57171  | 0.19338  | 0.58953  | 0.32007  | 0.61357  | 0.48306  | 0.2392   | 0.59848  | 0.50315  | 0.49028  | 0.29608  | 0.20093  | 0.16215  | -0.32886 | -0.50125 | -0.54363 | -1.20796 | -1.05186 | -0.78071 | -0.45828 | -0.44027 |
| PFI0685w       | 0.18443  | 0.24222  | 0.42321  | 0.49217  | 0.56476  | 0.72971  | 0.77902  | 0.80769  | 0.92341  | 1.06748  | 1.10401  | 0.79882  | 0.56768  | 0.40546  | 0.03437  | -0.30242 | -0.40607 | -0.59742 | -0.3711  | -0.14253 | 0.04741  | 0.06657  | 0.21986  | 0.53837  |
| PFC0860w       | -0.32443 | -0.241   | -0.34194 | -0.35057 | -0.35572 | -0.1946  | -0.50869 | -0.49235 | -0.80544 | -0.77208 | -0.465   | -0.06311 | 0.58849  | 0.93279  | 1.09404  | 1.08581  | 0.71805  | 0.90257  | 0.51445  | 0.48872  | 0.16365  | 0.07345  | -0.02861 | -0.31027 |
| MAL7P1.86      | 0.96071  | 0.44051  | -0.06791 | -0.05254 | -0.01946 | -0.28098 | -0.41186 | -0.06204 | -0.30649 | -0.34805 | -0.41407 | -0.43186 | -0.90882 | -0.99632 | -0.95897 | -0.67199 | -0.7082  | 0.36831  | 0.65531  | 0.81741  | 0.93291  | 0.8565   | 0.91895  | 0.80915  |
| PF14_0760      | 1.32863  | 1.10997  | 1.14915  | 1.11403  | 1.15844  | 0.90211  | 0.66217  | 0.66811  | 0.47709  | 0.16409  | -0.35834 | -0.71558 | -1.03777 | -1.46691 | -1.14768 | -1.16651 | -1.41354 | -1.16624 | 0.38131  | 0.8401   | 0.93447  | 0.81289  | 1.52773  | 1.82219  |
| PFE0610c       | 0.39367  | 0.68588  | 1.00965  | 0.9662   | 1.00812  | 1.16179  | 1.03026  | 0.90269  | 0.74563  | 0.48281  | 0.51897  | 0.54492  | 0.34069  | 0.30883  | 0.47586  | 0.25507  | 0.10259  | -0.04276 | -0.00971 | -0.43494 | -0.51532 | -0.39602 | -0.23163 | 0.20165  |
| PF10_0086      | -1.03958 | -0.74084 | -0.39216 | -0.42297 | -0.51208 | -0.14609 | 0.06861  | 0.44171  | 0.58689  | 0.43478  | 0.7158   | 0.83358  | 0.69892  | 0.41146  | 0.5708   | 0.24121  | -0.20544 | -0.42652 | -0.42202 | -0.89099 | -1.22118 | -1.14647 | -1.03636 | -0.94309 |
| PFD0180c       | -0.26311 | 0.20916  | 0.33566  | 0.30135  | 0.13942  | 0.35386  | 0.44068  | 0.54638  | 0.56113  | 0.5548   | 0.49585  | 0.5876   | 0.52325  | 0.27004  | 0.20753  | -0.08422 | -0.37177 | -0.41717 | -0.64151 | -0.69675 | -0.68243 | -0.2955  | -0.15587 | -0.1743  |
| PF14_0410      | -0.39956 | -0.25667 | -0.23593 | 0.26386  | 0.34833  | 0.84518  | 1.00445  | 1.0598   | 1.35365  | 1.30458  | 1.18432  | 1.14244  | 0.88778  | 0.63665  | 0.32841  | 0.1941   | -0.16944 | 0.24529  | -0.01597 | -0.17374 | -0.21803 | -0.22945 | -0.18069 | -0.27927 |
| PFA0490w       | -0.14472 | 0.33168  | 0.41771  | 0.64674  | 0.49442  | 0.67325  | 0.41262  | 0.38077  | 0.26492  | -0.08258 | 0.40093  | 0.06451  | 0.08672  | -0.22744 | -0.16618 | -0.29992 | -0.58041 | -0.47474 | -0.11924 | -0.21053 | -0.13229 | -0.01671 | 0.26888  | 0.42221  |
| PF14_0257      | -2.07266 | -1.92774 | -1.49497 | -1.65769 | -1.79547 | -1.55755 | -1.49061 | -1.13235 | -0.99368 | -0.14219 | 0.39461  | 0.73027  | 0.87564  | 0.97088  | 0.85193  | 0.71453  | 0.35567  | 0.1856   | -0.4285  | -0.90598 | -1.35864 | -1.53105 | -1.65329 | -1.90443 |
| PF07_0102      | 0.15838  | 0.79924  | 0.83994  | 1.10343  | 1.00941  | 1.15733  | 1.11915  | 0.82179  | 0.9052   | 0.69784  | 0.69364  | 0.72875  | 0.56332  | 0.4654   | 0.36596  | 0.16616  | -0.09077 | -0.11861 | -0.26726 | -0.60919 | -0.62902 | -0.51379 | -0.46264 | -0.3105  |
| MAL13P1.227    | -0.29895 | -0.56957 | -0.27998 | -0.53607 | -0.65864 | -0.33154 | -0.03926 | -0.19271 | 0.39782  | 0.50587  | 0.40148  | 0.60856  | 0.54255  | 0.55308  | 0.5131   | 0.54033  | 0.33473  | 0.54466  | 0.86569  | 0.52123  | 0.09169  | 0.01143  | -0.18898 | -0.24258 |
| PFA0550w       | -0.94382 | -0.95587 | -1.46004 | -0.97238 | -1.0435  | -0.95862 | -0.80823 | -0.60113 | -0.22829 | 0.20633  | 0.3846   | 0.67295  | 0.89459  | 0.91319  | 0.99488  | 0.7296   | 0.40795  | 0.66366  | -0.10065 | -0.03976 | -0.35595 | -0.49112 | -0.51605 | -0.63147 |
| MAL13P1.295    | -1.82441 | -1.94248 | -1.81657 | -2.52442 | -2.58791 | -2.47933 | -1.63749 | -0.87189 | 0.32695  | 0.55425  | 0.54295  | 0.72097  | 0.79431  | 0.84545  | 0.60764  | 0.46493  | 0.46288  | 0.37329  | -0.96397 | -0.74172 | -0.98082 | -1.17178 | -1.41434 | -1.67069 |
| PFL2185w       | -0.19976 | -0.11541 | -0.48974 | -0.24235 | -0.04105 | -0.43086 | -0.55424 | -0.65822 | -1.3318  | -1.59426 | -1.41905 | -1.31756 | -0.88097 | -0.21205 | 0.42463  | 0.78834  | 0.70602  | 0.76087  | 0.79786  | 0.56916  | 0.48472  | 0.16845  | 0.03806  | 0.09338  |
| PF11_0528      | 0.33527  | -0.16366 | -0.28833 | -0.76906 | -0.90014 | -0.83188 | -1.16738 | -1.31935 | -1.39663 | -1.47572 | -1.38161 | -1.18438 | -1.26569 | -0.80163 | -0.18342 | 0.6308   | 1.08087  | 0.96993  | 0.62639  | 1.2458   | 1.29429  | 0.81749  | 0.25284  | -0.2358  |
| PFC10_API0050t |          |          |          |          |          |          |          |          |          |          |          |          |          |          |          |          |          |          |          |          |          |          |          |          |
| RNA            | -0.13036 | -0.64974 | -1.29362 | -0.59312 | -0.7073  | -0.72419 | -0.84688 | -0.47713 | -0.2695  | -0.09687 | 0.02989  | 0.32707  | 0.11445  | 0.22836  | 0.35659  | 0.78604  | 0.65811  | 1.02139  | 0.75101  | 0.25672  | -0.0048  | 0.30337  | -0.19601 | -0.36815 |
| MAL8P1.77      | -0.63415 | -0.56699 | -0.27638 | 0.17667  | 0.43478  | 0.78869  | 0.69526  | 0.61448  | 0.82749  | 0.71815  | 0.803    | 0.76555  | 0.56165  | 0.11     | 0.28839  | 0.32656  | 0.27444  | 0.09777  | 0.46478  | -0.11894 | -0.31928 | 0.02429  | 0.02447  | -0.0147  |
| PFI1210w       | 0.16765  | 0.07767  | -0.36899 | -0.06324 | -0.10577 | -0.21742 | -0.31074 | -0.69585 | -0.84337 | -0.98401 | -1.09366 | -1.19471 | -0.89255 | -0.38055 | 0.2372   | 0.60055  | 1.17683  | 0.85462  | 0.72328  | 0.9986   | 1.0622   | 0.67685  | 0.54003  | 0.19259  |
| PFE0825w       | 0.27788  | -0.05331 | 0.30484  | 0.27243  | 0.31468  | 0.92753  | 0.08883  | 0.32197  | 0.22085  | 0.13804  | 0.1914   | 0.15151  | -0.0683  |          |          |          |          |          |          |          |          |          |          |          |

|             |          |          |          |          |          |          |          |          |          |          |          |          |          |          |          |          |          |          |          |          |          |          |          |          |
|-------------|----------|----------|----------|----------|----------|----------|----------|----------|----------|----------|----------|----------|----------|----------|----------|----------|----------|----------|----------|----------|----------|----------|----------|----------|
| MAL13P1.33  | 0.15122  | -0.01515 | 0.03799  | 0.05312  | -0.34083 | -0.27379 | -0.42841 | -0.63552 | -0.21072 | 0.2702   | 0.34678  | 0.75044  | 0.59293  | 0.69616  | 0.66188  | 0.64641  | 0.34291  | 0.59401  | 0.23621  | -0.01104 | 0.03201  | 0.00078  | 0.07381  | 0.03414  |
| PF14 0543   | -1.01919 | -0.92039 | -0.45272 | -0.51784 | -0.19947 | 0.07164  | 0.0835   | 0.0394   | -0.24223 | -0.42879 | -0.15128 | -0.27799 | -0.05018 | 0.03754  | 0.38874  | 0.39776  | 0.56842  | 0.25623  | -0.01409 | -0.26668 | -0.62067 | -0.861   | -0.87819 | -1.02864 |
| PF14 0086   | 0.80657  | 1.24866  | 1.17779  | 1.24306  | 1.14094  | 1.54282  | 1.54797  | 1.83014  | 1.69348  | 1.30679  | 1.35592  | 0.98099  | 0.75579  | 0.29747  | 0.0158   | -0.31737 | -0.53694 | -0.55585 | -0.46783 | -0.76039 | -0.54703 | -0.38297 | 0.00391  | -0.26775 |
| PFA0615w    | -2.04115 | -2.76966 | -3.28107 | -3.51479 | -0.94203 | -2.04081 | -0.44066 | 0.63019  | 1.76304  | 2.30014  | 1.27937  | 0.89194  | -0.26799 | 0.06786  | -0.30319 | -1.66297 | -1.20867 | -1.63843 | -2.47265 | -0.63616 | 0.88109  | -0.41075 | -0.27192 | 0.15823  |
| MAL8P1.149  | 0.17104  | -0.29647 | 0.25651  | -0.16058 | -0.26228 | -0.24254 | -0.33671 | -0.5448  | -0.51224 | -0.42491 | -0.21381 | -0.0084  | 0.14495  | 0.21822  | 0.31879  | 0.24186  | 0.32795  | 0.34744  | 0.38334  | 0.39903  | 0.34629  | 0.10965  | 0.14991  | 0.20163  |
| PF14 0387   | -0.83812 | -1.38627 | -1.51273 | -1.27224 | -0.81956 | 0.0171   | 0.78666  | 0.85135  | 1.11999  | 0.92744  | 0.74172  | 0.81262  | 0.69876  | 0.60078  | 0.38258  | 0.37506  | 0.15374  | 0.14936  | 0.00695  | -0.03778 | -0.5955  | -0.69717 | -0.67505 | -0.71685 |
| PF1410c     | -0.62258 | -0.31438 | -0.62329 | -0.85657 | -0.78679 | -0.77289 | -0.48696 | -0.18649 | 0.75379  | 0.98328  | 0.91146  | 0.8896   | 0.90692  | 0.83966  | 0.48193  | 0.27454  | 0.18302  | 0.14954  | -0.20932 | -0.19919 | -0.45563 | -0.394   | -0.47938 | -0.39593 |
| PFI0330c    | -0.45117 | -0.07548 | 0.48006  | 0.55996  | 0.47632  | 0.86772  | 0.78775  | 0.79569  | 1.29627  | 1.26666  | 1.17862  | 1.14387  | 0.94622  | 0.66456  | 0.18005  | -0.13464 | -0.30536 | -0.44911 | -1.07505 | -0.95582 | -1.11879 | -0.81319 | -0.59841 | -0.2716  |
| PFB0640c    | 0.30334  | 0.27535  | 0.13105  | 0.33312  | 0.23776  | 0.03006  | -0.1509  | -0.28842 | -0.42472 | -0.44011 | -0.47178 | -0.25687 | -0.20285 | -0.18338 | 0.04923  | 0.08763  | -0.05691 | -0.24321 | -0.12922 | 0.05063  | 0.09206  | 0.15469  | 0.25451  | 0.16002  |
| PFD0470c    | -0.57585 | -0.82582 | -0.81846 | -1.04791 | -0.76178 | -0.50818 | -0.4476  | -0.04115 | -0.001   | 0.19751  | 0.33049  | 0.27895  | 0.42621  | 0.30501  | 0.55579  | 0.37323  | 0.55468  | 0.32254  | 0.32129  | 0.09939  | 0.13763  | -0.04382 | -0.25881 | -0.68153 |
| PF11 0359   | 0.47349  | 0.7511   | 0.59793  | 0.95727  | 0.99773  | 0.9359   | 0.78594  | 0.80641  | 0.4741   | 0.16239  | 0.21828  | 0.2555   | 0.07273  | 0.1148   | 0.12459  | 0.25845  | 0.01337  | 0.17435  | 0.38538  | 0.01132  | 0.1475   | 0.2098   | 0.15654  | 0.04718  |
| PFI0790w    | 0.44102  | 0.06933  | 0.09364  | 0.23433  | 0.38033  | 0.17552  | 0.11226  | 0.1127   | -0.04082 | -0.27752 | -0.14555 | -0.20625 | -0.02568 | 0.07578  | 0.16149  | 0.2584   | -0.00997 | 0.44469  | 0.66541  | 0.52434  | 0.41596  | 0.18038  | 0.28966  | 0.32345  |
| MAL13P1.87  | -0.13515 | 0.11826  | 0.23239  | 0.23956  | 0.16138  | 0.0311   | 0.20508  | 0.09105  | 0.02591  | 0.09658  | 0.30859  | 0.39917  | 0.48771  | 0.31471  | 0.34431  | 0.28333  | 0.09071  | 0.09953  | -0.01188 | -0.36162 | -0.44253 | -0.55612 | -0.46816 | -0.33347 |
| PFD0145c    | -0.28301 | -0.14513 | 0.04023  | 0.01794  | 0.07248  | 0.24215  | 0.0356   | -0.21173 | -0.06421 | 0.15487  | 0.39327  | 0.42894  | 0.61437  | 0.62783  | 0.80686  | 0.78935  | 0.50269  | 0.38981  | -0.05652 | -0.07048 | -0.30967 | -0.32336 | -0.12816 |          |
| MAL13P1.202 | -0.94498 | -1.04757 | -0.96897 | -1.47806 | -1.52577 | -1.64669 | -1.34381 | -1.28685 | -1.13579 | -1.06566 | -1.08244 | -0.76962 | -0.23564 | 0.45983  | 0.82565  | 0.7692   | 0.86929  | 0.79762  | -0.11991 | 0.34972  | 0.14797  | -0.2391  | -0.70587 | -1.17229 |
| MAL13P1.237 | 0.17106  | 0.49817  | 0.62709  | 0.59538  | 0.76352  | 0.4852   | 0.29206  | -0.10541 | -0.19483 | 0.10124  | 0.38606  | 0.15474  | 0.17871  | 0.19659  | 0.03544  | -0.25455 | -0.87205 | -1.04583 | -1.54492 | -1.56707 | -1.04597 | -0.87648 | -0.50148 | -0.13079 |
| PF11 0109   | 0.00102  | 0.24362  | 0.34122  | 0.21965  | 0.2424   | 0.11719  | 0.15765  | 0.46031  | 0.59493  | 0.54302  | 0.46205  | 0.4757   | 0.24823  | -0.3225  | -0.38367 | -0.5495  | -0.85374 | -0.73546 | -0.99151 | -0.72687 | -0.59141 | -0.49416 | -0.26458 | -0.02081 |
| PF10 0328   | 0.04379  | 0.22813  | 0.43375  | 0.47151  | 0.29026  | 0.53332  | 0.42756  | 0.5864   | 0.59623  | 0.58409  | 0.77598  | 0.68897  | 0.60951  | 0.31287  | 0.3798   | -0.22791 | -0.27193 | -0.28735 | -0.12669 | -0.62712 | -0.66446 | -0.35973 | -0.31226 | -0.06689 |
| PF13 0166   | 1.00712  | 0.64388  | 0.14465  | 0.35209  | 0.10271  | -0.47146 | -0.48013 | -0.62969 | -0.93057 | -1.10228 | -1.11475 | -0.94639 | -1.06841 | -1.19574 | -0.9865  | -0.89226 | -0.20967 | -0.09469 | 1.43895  | 1.25125  | 1.57906  | 1.1205   | 1.38299  | 1.53366  |
| PFL1745c    | -1.25628 | -0.97892 | -0.42174 | -0.11549 | 0.4304   | 0.71419  | 0.81492  | 0.67715  | 0.46941  | 0.3773   | 0.25011  | 0.39274  | 0.33249  | 0.26321  | 0.11926  | -0.02469 | -0.09783 | -0.25059 | -0.74386 | -0.85545 | -1.05765 | -0.99361 | -1.05642 | -0.84166 |
| PF11 0156   | 0.13178  | 0.13267  | 0.39553  | 0.07002  | -0.04381 | 0.12674  | 0.05713  | 0.02978  | 0.09262  | 0.0811   | 0.09753  | 0.06884  | 0.16918  | 0.11328  | 0.20021  | 0.2532   | 0.07212  | 0.19204  | -0.18905 | -0.20188 | -0.12574 | -0.15094 | -0.16665 | -0.31592 |
| PFF1390w    | 0.02731  | 0.19218  | 0.09199  | 0.5807   | 0.7177   | 0.58302  | 0.60879  | 0.8755   | 0.81757  | 0.96278  | 0.89705  | 0.88266  | 0.35901  | 0.21031  | 0.03534  | -0.02639 | -0.18754 | 0.1071   | -0.17871 | -0.14873 | -0.21935 | -0.36635 | -0.29327 | -0.0903  |
| PFC1065w    | 0.20174  | 0.61146  | 0.82631  | 1.07096  | 1.03457  | 1.10744  | 0.80249  | 0.71576  | 0.49881  | 0.59809  | 0.39831  | 0.27041  | 0.24739  | 0.18115  | 0.0876   | -0.16754 | -0.31559 | -0.52887 | -0.49758 | -0.25799 | -0.31201 | -0.02272 | 0.16159  | 0.14238  |
| MAL13P1.24  | 0.43635  | -0.04347 | -0.03185 | 0.19958  | 0.18831  | 0.12333  | 0.07693  | 0.652    | 0.43227  | 0.19879  | 0.3058   | 0.1889   | -0.08214 | -0.25509 | -0.05341 | 0.00391  | -0.49784 | 0.08317  | 0.7981   | 0.368    | 0.4255   | 0.27912  | 0.42855  | 0.60286  |
| PFI0150c    | 0.03944  | 0.0992   | -0.0049  | 0.35909  | 0.66033  | 0.73391  | 0.86237  | 1.104    | 0.56909  | 0.48842  | 0.66399  | 0.31265  | -0.00725 | -0.17348 | -0.297   | -0.32219 | -0.47429 | -0.77927 | -0.37436 | -0.75454 | -0.67649 | -0.72557 | -0.5954  | -0.12435 |
| PF14 0509   | -0.31426 | 0.01213  | 0.65068  | 0.39576  | 0.60332  | 1.04016  | 1.193    | 1.35804  | 1.60257  | 1.52691  | 1.40618  | 1.24499  | 0.76134  | 0.47427  | -0.03696 | -0.24841 | -0.51522 | -0.27194 | -0.69086 | -0.60178 | -0.51517 | -0.29016 | -0.32335 | -0.1691  |
| PFD0395c    | 1.58345  | 1.23846  | 0.49618  | 0.36915  | 0.02088  | -0.21082 | -0.54332 | -0.77028 | -1.32111 | -1.62533 | -1.58261 | -1.73044 | -2.09997 | -2.10958 | -1.69982 | -1.88546 | -1.51291 | -0.62496 | 1.67858  | 1.14323  | 1.2775   | 1.46788  | 1.69412  | 1.75076  |
| PF14 0250   | 1.24532  | 1.48704  | 1.61186  | 1.50584  | 1.59368  | 0.8344   | 1.19906  | 1.50723  | 0.25029  | -0.37977 | -0.3582  | -1.03449 | -1.3248  | -1.26123 | -2.24802 | -2.25883 | -1.75924 | -2.34899 | -1.49249 | -0.28457 | 0.14505  | 0.45737  | 0.61346  | 1.2437   |
| PFB0970c    | 1.34757  | 0.95858  | 1.06928  | 0.95153  | 0.36378  | 0.5265   | 0.1692   | -0.50174 | -1.023   | -1.58082 | -2.11128 | -2.65592 | -2.66132 | -2.95977 | -2.77159 | -3.19069 | -3.21571 | -2.57255 | -0.21773 | 0.96287  | 1.14166  | 1.04793  | 1.63667  | 1.47975  |
| PF10 0154   | -0.9725  | -1.728   | -1.73843 | -1.61729 | -1.44979 | -1.87809 | -1.67612 | -1.80488 | -1.3659  | -0.61177 | 0.18789  | 0.61503  | 0.73747  | 0.83612  | 0.6966   | 0.7415   | 0.39183  | 0.58093  | 0.25354  | -0.04523 | -0.46713 | -0.77197 | -0.77684 | -0.9738  |
| PFB0840w    | -1.09053 | -1.15952 | -1.26883 | -1.39901 | -1.49783 | -1.65676 | -1.5107  | -1.21898 | -0.77052 | -0.14376 | 0.68431  | 0.90882  | 0.9345   | 0.84162  | 1.06364  | 0.7975   | 0.24934  | 0.29808  | 0.21036  | -0.33753 | -0.73157 | -0.90914 | -1.08727 | -1.0334  |
| PF08 0001   | 0.57332  | 0.61092  | 0.56991  | 0.31002  | 0.11613  | 0.21971  | 0.71132  | 0.95592  | 0.81399  | 0.54851  | 0.49358  | 0.22373  | -0.06101 | -0.38395 | -0.48288 | -0.8179  | -0.65063 | -0.32249 | 0.26926  | 0.18388  | 0.54481  | 0.4606   | 0.44166  | 0.56084  |
| PF14 0042   | 0.44049  | 0.867    | 0.81545  | 1.11252  | 0.8475   | 0.74492  | 0.46398  | 0.98223  | 0.6358   | 0.51377  | 0.46907  | 0.33614  | 0.33177  | 0.19188  | 0.14482  | -0.1259  | 0.0114   | -0.39248 | -0.2095  | -0.07218 | -0.0096  | 0.07271  | 0.26474  | 0.4056   |
| MAL7P1.158  | 0.35797  | 0.47008  | 0.25183  | 0.36983  | 0.68654  | 0.30774  | 0.06609  | 0.1933   | -0.23479 | 0.03962  | 0.14905  | -0.00477 | 0.12538  | -0.02683 | 0.20341  | 0.2443   | 0.10205  | 0.1837   | 0.18671  | -0.1531  | -0.07237 | 0.22986  | -0.00391 | 0.20538  |
| PF10 0363   | -0.57676 | -1.11439 | -1.12113 | -0.97625 | -0.48882 | 0.06148  | 0.41702  | 0.62719  | 0.84937  | 1.22227  | 1.1831   | 1.14035  | 0.83808  | 0.7216   | -0.23716 | -0.37929 | -0.13949 | -0.24465 | -0.32035 | -0.43378 | -0.32424 | -0.15596 |          |          |
| PF13 0090   | 0.61044  | 0.01314  | -0.21602 | -0.18562 | -0.18051 | -0.60742 | -0.57944 | -0.6236  | -0.9122  | -1.15735 | -1.33891 | -1.59312 | -1.73083 | -1.93643 | -1.95617 | -1.6288  | -0.74624 | -0.52996 | 1.8701   | 1.21201  | 1.22666  | 0.77958  | 1.25196  | 1.67837  |
| PFL2010c    | 0.72612  | 0.8918   | 0.73258  | 0.90195  | 0.84182  | 0.84035  | 0.89298  | 0.83086  | 1.15656  | 1.06276  | 0.85739  | 0.63826  | 0.2587   | 0.0027   | -0.23235 | -0.59132 | -0.64389 | -0.76967 | -0.57343 | -0.47109 | -0.13841 | 0.12633  | 0.32581  | 0.5482   |
| PFI0135c    | -1.23043 | -1.19571 | -1.71021 | -1.65071 | -1.51986 | -1.50711 | -1.32623 | -1.53345 | -1.01209 | -0.71677 | -0.30963 | 0.13611  | 0.82942  | 1.03213  | 1.08139  | 0.88519  | 0.47472  | 0.42963  | 0.23369  | -0.26869 | -0.72931 | -1.05609 | -1.53528 | -1.64186 |
| PF14 0677   | 0.42111  | 0.71847  | 0.85827  | 1.22192  | 1.19251  | 1.43965  | 1.3495   | 1.44731  | 1.54424  | 1.32843  | 1.22281  | 0.92911  | 0.62152  | 0.10373  | -0.06457 | -0.35971 | -0.70511 | -0.8245  | -1.00424 | -1.08104 | -0.98319 | -0.53597 | -0.48344 | 0.03205  |
| PFC0080c    | 1.31339  | 1.15101  | 1.25908  | 1.41016  | 1.44802  | 1.48467  | 1.31606  | 1.42004  | 1.44353  | 1.0963   | 0.72924  | 0.18786  | -0.44299 | -1.07131 | -1.61384 | -2.11025 | -2.18736 | -2.08972 | -1.73775 | -0.99881 | -0.7211  | 0.21802  | 0.69025  | 0.71075  |
| PFI0355c    | -1.25501 | -1.17332 | -0.92608 | -1.23374 | -1.13171 | -0.76464 | -0.5929  | -0.53581 | -0.48086 | -0.57693 | -0.52278 | -0.50092 | -0.31229 | -0.25792 | 0.19822  | 0.51682  | 0.67536  | 0.7852   | 0.04893  | -0.06935 | -0.18736 | -0.48854 | -0.82545 | -1.      |

|                |          |          |          |          |          |          |          |          |          |          |          |          |          |          |          |          |          |          |          |          |          |          |          |          |
|----------------|----------|----------|----------|----------|----------|----------|----------|----------|----------|----------|----------|----------|----------|----------|----------|----------|----------|----------|----------|----------|----------|----------|----------|----------|
| PF10_0197      | 0.46588  | 0.97331  | 0.35923  | 1.58967  | 1.44228  | 0.99245  | 1.00566  | 1.42936  | 1.50816  | 0.80701  | 0.91338  | 0.8221   | 0.6886   | 0.44248  | 0.18679  | 0.16323  | -0.2308  | -0.24303 | 0.18248  | -0.70785 | -0.61693 | 0.09846  | 0.1754   | 0.44426  |
| PF11170c       | 1.2405   | 1.15546  | 0.63352  | 1.37969  | 1.53598  | 0.42859  | -0.07401 | 0.19408  | -1.04004 | -0.69067 | -0.49964 | -0.97    | -1.23329 | -1.95171 | -2.00712 | -2.72171 | -3.19647 | -3.3571  | -1.30239 | -0.07936 | 0.64098  | 0.45572  | 1.61339  | 1.84336  |
| PF14_0218      | -0.46443 | 0.18998  | 0.43503  | 0.40737  | 0.43732  | 0.4554   | 0.56412  | 0.07243  | 0.39556  | 0.46732  | 0.58422  | 0.5201   | 0.56281  | 0.435    | 0.39908  | 0.13848  | 0.06404  | -0.65774 | -0.72295 | -0.8949  | -0.95324 | -0.92081 | -0.72191 | -0.40715 |
| PF11_0154      | -0.60284 | -0.29298 | -0.73052 | -0.36571 | -0.40205 | -0.30626 | -0.32113 | -0.04166 | 0.36048  | 0.44961  | 0.49973  | 0.58648  | 0.52511  | 0.44896  | 0.53692  | 0.46429  | 0.34854  | 0.40066  | 0.53317  | 0.29818  | -0.04368 | -0.21397 | -0.20053 | -0.33507 |
| PF14_0397      | -0.12769 | -0.08741 | -0.17599 | -0.26563 | -0.29834 | -0.05065 | 0.06244  | 0.036    | 0.05257  | 0.14515  | 0.28003  | 0.33218  | 0.42082  | 0.32906  | 0.74525  | 0.81074  | 0.62028  | 0.76007  | 0.70968  | 0.46511  | 0.39022  | -0.11951 | -0.31031 | -0.38741 |
| PF14_0465      | 0.95568  | 1.04906  | 0.62534  | 1.02402  | 0.70694  | 0.92735  | 0.8379   | 1.01703  | 0.81409  | 0.56281  | 0.42347  | 0.20881  | -0.44972 | -0.4642  | -0.38397 | -0.58952 | -0.2599  | -0.3115  | 0.11899  | 0.02288  | 0.06181  | 0.15567  | 0.41922  | 0.45406  |
| PF10_0095      | 0.76305  | 1.01469  | 1.0913   | 1.14323  | 1.05947  | 1.01759  | 0.87046  | 0.92355  | 0.78425  | 0.62382  | 0.64948  | 0.35889  | 0.29259  | 0.0575   | -0.28891 | -0.38192 | -0.36005 | -0.62397 | -0.65892 | -0.15919 | 0.31361  | 0.41976  | 0.59046  |          |
| PF11300w       | -1.61528 | -1.33849 | -0.74882 | -0.48476 | 0.0396   | 0.24128  | 0.05433  | -0.19917 | -0.30363 | 0.2534   | 0.42807  | 0.61935  | 0.72087  | 0.63511  | 0.51012  | 0.24284  | -0.0556  | -0.43063 | -0.97103 | -1.62553 | -1.89205 | -1.92439 | -2.00085 | -1.7008  |
| PF14_0587      | 0.25918  | 0.60971  | 0.86791  | 0.85662  | 0.72999  | 0.71943  | 0.6663   | 0.65542  | 0.62515  | 0.69149  | 0.54199  | 0.52507  | 0.54258  | 0.29962  | 0.19817  | -0.01825 | -0.31058 | -0.27757 | -0.51505 | -0.65846 | -0.56915 | 0.04615  | 0.18953  | 0.33778  |
| PF11_0243      | 0.57379  | -0.04485 | -0.28577 | -0.37386 | -0.35759 | -0.58015 | -0.81067 | -0.94379 | -1.23682 | -1.12897 | -0.97609 | -0.83158 | -0.72657 | -0.35525 | -0.12501 | 0.32799  | 0.35328  | 0.6291   | 1.07724  | 0.85722  | 0.8567   | 0.77182  | 0.68023  | 0.47045  |
| PF10_API0025:t |          |          |          |          |          |          |          |          |          |          |          |          |          |          |          |          |          |          |          |          |          |          |          |          |
| RNA            | 0.20632  | -0.22329 | -0.65931 | -0.69136 | -0.7605  | -0.72599 | -0.7     | -0.36053 | -0.41871 | -0.27635 | -0.34044 | -0.06574 | -0.18749 | 0.02636  | 0.12303  | 0.64577  | 0.16242  | 0.79806  | 0.74607  | 0.49446  | 0.25793  | 0.50308  | -0.04784 | -0.087   |
| PF14_0343      | -0.20443 | -0.63237 | -0.87749 | -0.88441 | -0.97997 | -1.33639 | -1.52907 | -1.57045 | -1.93567 | -1.96139 | -2.03159 | -2.12073 | -2.2332  | -1.95786 | -0.85026 | 0.17026  | 0.93287  | 0.56244  | 0.66511  | 0.74575  | 1.04488  | 0.51008  | 0.27799  | -0.02809 |
| PF1485w        | -0.34534 | -0.64275 | -0.22769 | -0.17649 | -0.15555 | -0.09057 | -0.05431 | -0.1409  | -0.27035 | -0.04526 | -0.10112 | -0.02156 | 0.21892  | 0.25227  | 0.0499   | 0.43185  | 0.38432  | -0.01249 | 0.47783  | 0.21042  | 0.02657  | -0.13747 | -0.0012  | -0.30719 |
| PFE0205w       | 0.54659  | -0.04455 | -0.48064 | -0.45054 | -0.59023 | -0.82361 | -0.58105 | -0.3019  | -0.01888 | 0.1278   | 0.12463  | 0.33986  | 0.29727  | 0.26902  | 0.25778  | 0.17499  | 0.00952  | 0.27919  | 0.91079  | 0.58089  | 0.73232  | 0.57568  | 0.66103  | 0.80133  |
| PF101045c      | -0.12866 | 0.03888  | 0.5146   | 0.44809  | 0.4364   | 0.55185  | 0.49267  | 0.07507  | 0.48607  | 0.62233  | 0.39206  | 0.32663  | 0.32608  | 0.36347  | -0.17625 | -0.36424 | -0.1083  | -0.21438 | -0.48825 | -0.07048 | -0.08    | 0.10836  | 0.06563  | -0.01117 |
| PF10_0215      | -1.31861 | -1.82708 | -1.43914 | -1.65507 | -1.4481  | -1.17394 | -0.834   | -0.51281 | -0.0633  | 0.27701  | 0.70077  | 0.74387  | 0.96925  | 0.97041  | 0.89585  | 0.69459  | 0.30821  | 0.1291   | -0.20349 | -0.28619 | -0.8666  | -0.8369  | -0.90075 | -1.19459 |
| PF13_0141      | -2.49524 | -1.54559 | -1.05288 | -0.7674  | -0.55081 | -0.34123 | -0.29927 | -0.57411 | -0.63542 | 0.01798  | 0.6193   | 0.77015  | 0.83116  | 0.69067  | 0.22511  | 0.04253  | -0.12283 | -0.59611 | -0.9109  | -2.29056 | -2.50497 | -2.40851 | -2.47913 | -2.01344 |
| PF11335w       | 0.85748  | 0.82488  | 0.73916  | 0.9169   | 1.14247  | 0.98944  | 0.95339  | 0.92004  | 0.4302   | 0.0635   | -0.04949 | -0.27725 | -0.18026 | -0.17705 | -0.44836 | -0.39059 | -0.17412 | 0.12966  | 0.30455  | 0.77698  | 1.02141  | 1.36484  | 1.58985  | 1.60309  |
| PFC0282w       | 0.31379  | 0.52447  | 0.72648  | 0.64253  | 0.71854  | 0.72651  | 0.53105  | 0.55445  | 0.32044  | 0.34819  | 0.68204  | 0.53398  | 0.52306  | 0.16904  | 0.30351  | 0.05281  | -0.20126 | -0.28022 | -0.25747 | -0.58561 | -0.5704  | -0.5231  | -0.32051 | 0.01825  |
| PF0745c        | -1.13593 | -1.0513  | -0.94311 | -0.74041 | -0.65124 | -0.49274 | -0.45301 | -0.20091 | -0.35699 | -0.10829 | 0.26364  | 0.35614  | 0.40163  | 0.30313  | 0.72862  | 0.38659  | 0.39299  | 0.24562  | 0.4867   | -0.50819 | -0.5558  | -0.92197 | -1.0428  | -0.96762 |
| PF10405c       | -0.34691 | -0.13234 | 0.02032  | 0.17689  | 0.29001  | 0.57201  | 0.69934  | 0.75276  | 0.72361  | 0.76179  | 0.6196   | 0.41745  | 0.30525  | -0.05453 | -0.04336 | -0.10553 | -0.0713  | -0.084   | 0.05113  | -0.13221 | -0.19046 | -0.18665 | -0.20388 | -0.04415 |
| PFE1220w       | 0.3201   | 0.35444  | 0.26442  | 0.33022  | 0.22231  | 0.26618  | 0.10287  | 0.18007  | 0.09142  | 0.24454  | 0.52336  | 0.52305  | 0.2895   | 0.13881  | 0.31015  | 0.20273  | -0.22804 | 0.12281  | 0.3165   | -0.09745 | -0.29551 | -0.38797 | -0.12522 | 0.04289  |
| PF11_0097      | -0.31816 | -0.35362 | -0.37368 | -0.58379 | -0.68348 | -0.64393 | -0.97978 | -0.87422 | -1.28359 | -1.25452 | -0.55403 | -0.20755 | 0.1825   | 0.21994  | 0.75538  | 0.83137  | 0.43668  | 0.65854  | 0.72974  | 0.23924  | 0.01903  | -0.30309 | -0.43031 | -0.46374 |
| PF13_0310      | 0.43742  | 0.8971   | 0.77608  | 0.84491  | 0.78517  | 0.65934  | 0.74123  | 0.80455  | 0.92781  | 0.80992  | 0.66271  | 0.46403  | 0.38819  | 0.07066  | -0.30799 | -0.68402 | -0.67142 | -0.94965 | -1.12514 | -0.66927 | -0.25738 | 0.17135  | 0.22409  | 0.2861   |
| PF14_0532      | 0.26449  | 0.43276  | 0.70963  | 0.64804  | 0.922    | 0.90896  | 0.92584  | 0.90994  | 0.55146  | 0.52915  | 0.53089  | 0.37085  | 0.35621  | 0.25278  | 0.12094  | 0.07099  | 0.00685  | 0.05367  | 0.13147  | 0.22339  | 0.29066  | 0.43611  | 0.53035  | 0.63367  |
| PFC0910w       | 0.08441  | -0.65735 | -0.85844 | -1.10654 | -0.99278 | -0.94312 | -0.21822 | 0.44664  | 0.11217  | -0.28467 | -0.36781 | -0.57205 | -0.78069 | -0.82428 | -0.69063 | -0.30918 | -0.05239 | 0.00815  | 1.46387  | 0.86532  | 0.7626   | 0.3428   | 0.48905  | 0.50483  |
| PF11_0518      | -0.91439 | -0.85458 | -1.13851 | -0.59354 | -0.77468 | -0.89806 | -0.97611 | -1.02882 | -1.12921 | -1.11559 | -0.79781 | -1.08546 | -1.04528 | -1.16806 | -1.28624 | -1.01645 | -1.41364 | -1.21249 | -1.27307 | -1.21125 | -1.28492 | -1.5483  | -1.22985 | -1.17033 |
| PF08_0130      | 0.61828  | 0.91077  | 0.91362  | 0.92189  | 0.90635  | 0.91709  | 0.94788  | 1.05162  | 1.21399  | 1.01097  | 0.65519  | 0.39623  | -0.07332 | -0.43992 | -0.64833 | -0.40283 | -0.94652 | -0.64044 | -0.54808 | -0.23104 | -0.17872 | 0.17281  | 0.43237  |          |
| PF10602w       | 0.01931  | 0.26424  | 0.31277  | -0.41474 | -0.71197 | -0.65908 | -0.5292  | -0.46578 | -0.10246 | -0.05407 | -0.00764 | 0.16288  | 0.08867  | 0.01271  | 0.05955  | 0.37074  | 0.1605   | 0.85445  | 0.77649  | 0.78832  | 0.36176  | 0.13598  | 0.13704  | -0.12656 |
| PF11_0131      | -0.24851 | -0.36845 | -0.40451 | -0.50925 | -0.65477 | -0.69068 | -0.77893 | -0.78068 | -0.79438 | -0.42828 | -0.07349 | 0.20008  | 0.60408  | 0.58256  | 0.65434  | 0.48099  | 0.50188  | 0.46986  | 0.35143  | 0.14524  | 0.17008  | 0.0693   | -0.00879 | -0.09358 |
| PF11275c       | 0.11336  | 0.45252  | -0.05032 | 0.30445  | 0.16275  | 0.1151   | 0.22591  | -0.23904 | -0.09082 | -0.00925 | 0.02289  | 0.29938  | 0.56547  | 0.53377  | 0.48407  | 0.50143  | 0.55263  | 0.72073  | 0.82134  | 0.34467  | 0.61989  | 0.36378  | 0.09596  | 0.02278  |
| PFE0070w       | 1.48016  | 1.87107  | 1.80632  | 1.69394  | 1.56116  | 1.20235  | 0.99085  | 1.00585  | -0.21138 | -0.74072 | -1.72698 | -2.02126 | -2.14506 | -2.00241 | -1.90846 | -1.75252 | -1.43238 | -1.55187 | -1.81006 | -0.54383 | 0.24083  | 1.04512  | 1.16021  | 1.26543  |
| PF10340c       | -0.18109 | -0.3452  | -0.19514 | -0.26882 | -0.11889 | -0.21814 | -0.21784 | -0.06922 | 0.25466  | 0.60294  | 0.83     | 0.48508  | 0.7885   | 0.63757  | 0.42114  | 0.25827  | 0.15759  | 0.01444  | -0.12862 | -0.18496 | -0.02769 | -0.12661 | -0.10614 | -0.05121 |
| PF10_0163      | 1.79766  | 1.62101  | 0.79466  | 0.44561  | 0.24396  | -0.29661 | -0.65798 | -1.07186 | -1.84638 | -2.25113 | -2.70925 | -2.89812 | -2.97522 | -3.24785 | -3.45424 | -3.23151 | -3.02094 | -2.22472 | -0.15936 | 0.83902  | 0.85019  | 0.86367  | 1.10339  | 1.19364  |
| PF0915w        | -0.43885 | -0.6504  | -1.00719 | -1.32797 | -1.56287 | -1.71096 | -1.69325 | -1.70438 | -1.47769 | -1.31453 | -1.16077 | -0.77335 | -0.25836 | 0.13659  | 0.63634  | 0.84051  | 0.85749  | 0.90029  | 0.54881  | 0.4167   | 0.13343  | -0.06664 | -0.53861 | -0.73984 |
| PF13_0175      | 0.82518  | 1.0048   | 1.03172  | 1.2339   | 1.12139  | 1.3522   | 1.02018  | 1.18762  | 0.83017  | 0.33673  | 0.42453  | 0.13129  | -0.0703  | -0.40282 | -0.45791 | -0.62413 | -0.92031 | -0.6576  | -0.42778 | -0.45646 | -0.12749 | -0.02623 | 0.37654  | 0.74336  |
| PF07_0126      | 0.68224  | 0.45716  | 0.43142  | 0.73062  | 0.6523   | 0.55273  | 0.26574  | -0.02855 | 0.25856  | 0.47777  | 0.3352   | 0.3475   | -0.05803 | -0.31722 | -0.99366 | -1.5415  | -1.37189 | -1.16918 | -0.2119  | -0.03697 | 0.33522  | 0.53021  | 0.50206  | 0.65463  |
| PF11_0049      | -0.22548 | -0.81185 | -0.67999 | -0.84148 | -0.66623 | -0.65419 | -0.58255 | -0.69266 | -0.20721 | -0.04457 | -0.0822  | 0.09579  | 0.29133  | 0.6931   | 0.23507  | 0.20107  | 0.31229  | 0.13402  | -0.59361 | 0.04259  | -0.09203 | 0.14187  | 0.01447  | -0.00217 |
| PF13_0297      | 0.30134  | 0.63132  | 0.94298  | 0.63326  | 0.81599  | 0.78427  | 0.60571  | 0.48481  | 0.33071  | 0.30311  | 0.35737  | 0.52322  | 0.63979  | 0.3771   | 0.27046  | 0.00905  | -0.12316 | -0.22113 | -0.05457 | -0.52779 | -0.54901 | -0.10766 | 0.20865  | 0.42296  |
| PFI0095c       | 0.36169  | 0.29509  | 0.5693   | 0.30036  | 0.15493  | 0.32053  | 0.5862   | 1.22054  | 1.80253  | 1.93286  | 1.71162  | 1.57184  | 0.8766   | 0.33236  | -0.10714 | -0.49493 | -1.60555 | -0.92534 | -0.91939 | -1.0275  | -0.99318 | -0.78484 | -0.59446 | -0.2988  |
| MAL8P1.85      | -0.64494 | -0.43251 | -0.60175 | -0.38995 | -0.50024 | -0.42332 | -0.5386  | -0.53477 | -0.5726  | -0.4871  | 0.01906  | 0.05376  | 0        |          |          |          |          |          |          |          |          |          |          |          |

|             |          |          |          |          |          |          |          |          |          |          |          |          |          |          |          |          |          |          |          |          |          |          |          |          |
|-------------|----------|----------|----------|----------|----------|----------|----------|----------|----------|----------|----------|----------|----------|----------|----------|----------|----------|----------|----------|----------|----------|----------|----------|----------|
| MAL13P1.360 | 0.57118  | 0.33644  | 0.2387   | 0.55399  | 0.70673  | 0.5276   | 0.57801  | 0.79598  | 0.4679   | 0.34554  | 0.27407  | 0.39911  | -0.31697 | -0.45187 | -0.81321 | -0.64368 | -0.88867 | -0.17788 | 0.38365  | 0.48849  | 0.46504  | 0.45211  | 0.81535  | 0.94724  |
| PF13_0289   | 0.29576  | 0.4597   | 1.13827  | 0.99659  | 1.20167  | 1.43373  | 1.38336  | 1.18606  | 0.80569  | 0.68222  | 0.31952  | 0.397    | 0.10937  | 0.13853  | 0.08791  | 0.06107  | 0.0122   | 0.15043  | 0.08644  | 0.29962  | 0.26833  | 0.29331  | 0.50073  | 0.51805  |
| PFI1150w    | -0.19731 | -0.18445 | -0.3532  | 0.07615  | 0.06348  | 0.16595  | 0.2353   | 0.39996  | 0.45515  | 0.62222  | 0.72443  | 0.64995  | 0.53442  | 0.29461  | 0.35436  | 0.2596   | -0.0447  | 0.17245  | 0.49623  | -0.07961 | -0.05802 | -0.07634 | -0.19446 | -0.07881 |
| MAL7P1.122  | -0.07011 | -0.20549 | 0.14708  | 0.0088   | -0.10624 | 0.15493  | 0.17618  | 0.32283  | 0.39445  | 0.53178  | 0.65347  | 0.88671  | 0.80454  | 0.58826  | 0.43946  | 0.0706   | -0.49187 | -0.62207 | -0.49712 | -0.77475 | -0.74212 | -0.51424 | -0.30493 | -0.17201 |
| PFI0805w    | -0.02828 | 0.09209  | 0.15853  | 0.2545   | 0.02134  | 0.28861  | 0.19136  | -0.03288 | 0.10269  | 0.35001  | 0.08218  | 0.14333  | 0.15371  | 0.29762  | -0.00512 | -0.03782 | -0.04633 | 0.04714  | 0.14754  | 0.32863  | 0.04225  | 0.25042  | 0.10048  | 0.49238  |
| PF11_0390   | 0.90099  | 0.65669  | 0.3746   | 0.37801  | 0.4513   | 0.36027  | 0.21681  | 0.17199  | 0.16748  | 0.07916  | 0.09066  | 0.024    | -0.08519 | -0.09712 | -0.08081 | -0.04344 | 0.05959  | 0.13581  | 0.27167  | 0.41548  | 0.61166  | 0.51119  | 0.51793  | 0.62951  |
| PF10_0299   | 0.30716  | 0.66598  | 0.77239  | 0.42817  | 0.52163  | 0.63203  | 0.59827  | 0.45871  | 0.57352  | 0.67421  | 0.73059  | 0.83047  | 0.79267  | 0.59059  | 0.36862  | 0.08972  | -0.44356 | -0.29199 | -0.60411 | -0.83795 | -0.71262 | -0.45987 | -0.36226 | -0.10669 |
| PF14_0480   | -0.06236 | -0.28272 | -0.08877 | -0.43739 | -0.52665 | -0.57683 | -0.63225 | -0.67701 | -0.85898 | -0.62656 | -0.83915 | -0.74495 | -0.32744 | -0.16224 | 0.06141  | 0.38576  | 0.26906  | 0.40862  | 0.21482  | 0.67935  | 0.65824  | 0.17089  | 0.30804  | 0.01531  |
| PF14_0060   | -0.68424 | -0.72519 | -0.73843 | -0.79411 | -0.71324 | -0.95784 | -0.83368 | -0.46226 | -0.15804 | 0.2583   | 0.65339  | 0.82956  | 0.87866  | 0.88526  | 0.8245   | 0.48161  | -0.04297 | -0.15419 | -0.02237 | -0.32121 | -0.47152 | -0.8414  | -0.82627 | -0.5149  |
| PFL2045w    | -0.64332 | -0.81875 | -0.69181 | -1.31899 | -1.38879 | -1.03115 | -1.08727 | -0.73696 | -0.42783 | -0.09854 | 0.00587  | 0.27815  | 0.46065  | 0.39993  | 0.67921  | 0.47373  | 0.57856  | 0.21375  | -0.12717 | -0.21437 | -0.46783 | -0.63226 | -0.98364 |          |
| PFI1310w    | -1.13816 | -1.15303 | -0.78171 | -0.71877 | -0.44509 | -0.28567 | -0.11952 | 0.14533  | 0.39867  | 0.58225  | 0.86216  | 0.94019  | 0.91235  | 0.64245  | 0.69661  | 0.33309  | -0.11842 | -0.02445 | -0.22305 | -0.75798 | -1.12599 | -1.34084 | -1.46861 | -1.42442 |
| MAL8P1.47   | 0.72291  | 1.1765   | 0.74168  | 1.46116  | 1.37523  | 1.35052  | 1.16662  | 1.20482  | 0.92954  | 0.65526  | 0.48247  | 0.38227  | 0.22563  | 0.18607  | 0.16957  | 0.08164  | 0.26256  | 0.35346  | 0.51927  | 0.47176  | 0.4542   | 0.58133  | 0.7427   |          |
| PFE1140c    | -0.09321 | 0.306    | 0.31978  | 0.37159  | 0.28731  | 0.37509  | 0.22151  | 0.207    | 0.19496  | 0.3364   | 0.52661  | 0.66806  | 0.6164   | 0.4076   | 0.47156  | 0.13837  | -0.38079 | -0.15316 | -0.52842 | -0.67267 | -0.71812 | -0.58109 | -0.44003 | -0.16106 |
| MAL8P1.102  | -0.88808 | -0.81501 | -0.55366 | -0.41108 | -0.38958 | -0.13236 | 0.22397  | 0.2831   | 0.4991   | 0.71919  | 0.79599  | 1.09089  | 0.65818  | 0.56999  | 0.35755  | 0.14494  | 0.06085  | -0.06779 | -0.55083 | -0.49068 | -0.74544 | -0.89839 | -0.90787 | -0.85011 |
| PF13_0196   | 0.73781  | 0.33356  | -0.06205 | -0.07862 | -0.27264 | -0.35127 | -0.39036 | -0.38838 | -0.13839 | -0.37135 | -1.39329 | -0.82834 | -1.12755 | -1.18899 | -0.82937 | -0.28222 | 0.32031  | 0.55241  | 1.69549  | 1.64192  | 1.46124  | 0.95418  | 0.89679  | 0.18227  |
| PF13_0282   | -0.86759 | -0.64869 | -0.67182 | -0.59061 | -0.63253 | -0.36733 | -0.50183 | -0.34613 | -0.33999 | -0.19621 | 0.27078  | 0.47512  | 0.52829  | 0.49245  | 0.87032  | 0.67221  | 0.00946  | 0.44376  | 0.21281  | -0.50366 | -0.81591 | -1.03053 | -1.11685 | -1.05868 |
| PF14_0636   | 0.16588  | 0.39671  | 0.54373  | 0.68868  | 0.5889   | 0.66871  | 0.48308  | 0.4765   | 0.23683  | 0.1368   | 0.29613  | -0.23671 | -0.22191 | -0.63223 | -0.79652 | -0.9217  | -0.83536 | -0.65559 | -0.1557  | -0.18388 | 0.25065  | 0.58486  | 0.73374  | 1.04628  |
| PF14_0737   | -0.31546 | 0.05534  | 0.05757  | 0.21641  | 0.66372  | 1.0834   | 1.24912  | 1.38226  | 1.18191  | 0.9125   | 0.89872  | 0.57611  | 0.18169  | 0.08251  | 0.02499  | 0.07043  | -0.35482 | 0.01927  | 0.19004  | 0.14898  | 0.08306  | 0.42152  | 0.43252  | 0.62023  |
| FFF1580c    | 0.33944  | 0.40463  | 0.89813  | 0.67132  | 0.64856  | 1.18409  | 1.05888  | 0.76865  | 0.68654  | 0.42318  | 0.3893   | 0.36701  | 0.1886   | 0.40496  | 0.12743  | 0.14308  | 0.00579  | -0.04638 | 0.10857  | -0.0193  | 0.02181  | 0.1011   | 0.06829  | 0.47325  |
| PF14_0170   | 0.16084  | 0.26434  | 0.22699  | 0.23128  | 0.1017   | 0.11321  | 0.20126  | 0.03085  | 0.22259  | 0.21031  | -0.06402 | 0.02556  | 0.10776  | 0.27366  | -0.12415 | -0.25615 | -0.01725 | -0.24398 | -0.85934 | -0.24771 | -0.08583 | 0.16261  | 0.06811  | 0.05089  |
| MAL13P1.277 | -0.12774 | -0.21628 | 0.00356  | 0.68997  | 0.82903  | 1.30325  | 1.33202  | 1.33936  | 1.24271  | 0.63402  | 0.66025  | 0.55454  | 0.49436  | 0.02776  | -0.02369 | -0.04817 | 0.10102  | -0.20772 | 0.80415  | 0.24738  | 0.18037  | 0.04422  | 0.27367  | 0.05587  |
| PFB0687c    | -0.03283 | -0.32078 | -0.41584 | -0.38673 | -0.35272 | -0.20839 | -0.26507 | -0.15293 | -0.32109 | -0.2422  | -0.05557 | -0.14233 | -0.27718 | -0.44626 | -0.00275 | 0.32885  | 0.34865  | 0.61314  | 0.60877  | 0.35632  | 0.21558  | 0.17032  | 0.04628  | -0.24453 |
| PF11_0250   | 0.47301  | 0.60224  | 0.62364  | 0.83248  | 0.68275  | 1.03354  | 0.85274  | 0.98716  | 1.00991  | 0.85883  | 0.86309  | 0.89852  | 0.69017  | 0.13354  | 0.10063  | -0.44671 | -0.77994 | -0.87851 | -0.30465 | -0.87585 | -0.32917 | -0.13917 | 0.08242  | 0.41736  |
| PFB0190c    | -0.2838  | -0.51597 | -0.68379 | -1.1805  | -1.11248 | -1.239   | -1.4294  | -1.49716 | -1.72787 | -1.64131 | -1.90772 | -1.75183 | -1.57526 | -0.86189 | -0.01569 | 0.66913  | 0.71635  | 0.8811   | 0.48519  | 0.90373  | 0.70239  | 0.36859  | -0.08119 | -0.52643 |
| PFD0115c    | 0.42397  | 0.41214  | 0.26278  | -0.1197  | -0.38582 | -0.33762 | -0.13556 | 0.23191  | 0.51899  | 0.6195   | 0.40761  | 0.30236  | 0.02989  | -0.17256 | -0.18437 | -0.34525 | -0.07982 | -0.49853 | -0.14589 | -0.2099  | 0.11095  | -0.13775 | 0.01517  | -0.04819 |
| PFL0620c    | -0.42617 | -0.1773  | 0.16204  | 0.40542  | 0.42316  | 0.33939  | 0.0582   | -0.19051 | -0.55688 | -0.67499 | -0.30833 | 0.01665  | 0.33185  | 0.41379  | 0.60703  | 0.59931  | 0.35599  | 0.06381  | -0.20758 | -0.44502 | -0.68497 | -0.6697  | -0.50902 | -0.28811 |
| PF08_0020   | -0.33733 | -0.1204  | -0.01049 | 0.10048  | 0.0335   | 0.03011  | -0.14805 | -0.14089 | -0.41926 | -0.15007 | -0.02263 | 0.10436  | 0.25302  | 0.34328  | 0.4947   | 0.46355  | 0.33208  | 0.29103  | 0.10552  | -0.10121 | -0.29364 | -0.44373 | -0.46823 | -0.40715 |
| PFI10_0028  | 0.17582  | 0.53769  | 0.26576  | 0.13924  | 0.03033  | -0.12399 | -0.31234 | -0.30903 | -0.16805 | 0.05821  | 0.24981  | 0.30336  | 0.37374  | 0.21084  | 0.21346  | -0.0694  | -0.48207 | -0.18839 | -0.85375 | -0.7439  | -0.68732 | -0.51966 | -0.50607 | -0.28308 |
| PFI1350c    | 1.16023  | 1.12456  | 0.42148  | 0.51956  | 0.3961   | 0.09699  | -0.11812 | -0.05073 | -0.38346 | -0.36583 | -0.33842 | -0.32174 | -0.43298 | -0.56116 | -0.30681 | -0.16495 | -0.31853 | 0.6899   | 1.07155  | 1.11693  | 0.95575  | 0.64201  | 0.71159  | 0.47863  |
| PF14_0071   | -0.06173 | 0.16028  | 0.0328   | 0.12602  | 0.15067  | 0.08021  | 0.0046   | 0.14116  | 0.04331  | 0.02746  | 0.47153  | 0.28056  | 0.18844  | -0.0367  | 0.12193  | 0.11676  | -0.09284 | 0.02547  | 0.27282  | -0.23031 | -0.21385 | -0.1502  | -0.11012 | 0.05486  |
| PF13_0152   | 0.92953  | 0.76085  | 0.35465  | 0.86609  | 0.97075  | 0.45284  | 0.36457  | 0.50599  | 0.11663  | -0.29709 | -0.31253 | -0.42911 | -0.57799 | -0.73133 | -0.3319  | 0.10914  | 0.43356  | 0.50549  | 1.33213  | 1.15433  | 1.39931  | 0.47405  | 0.9268   | 0.80684  |
| PF08_0080   | -0.56242 | -0.37412 | -0.35806 | -0.31413 | -0.33042 | -0.32242 | -0.05582 | 0.01955  | 0.03091  | 0.25845  | 0.54126  | 0.62341  | 0.54868  | 0.5494   | 0.49089  | 0.48598  | 0.07287  | 0.14886  | 0.22959  | -0.11743 | -0.11616 | -0.28531 | -0.26582 | -0.25137 |
| MAL7P1.131  | 1.6735   | 1.18585  | 1.60019  | 1.12104  | 0.82179  | 0.62389  | 0.62662  | 0.78316  | 0.67232  | 0.64879  | 0.46592  | 0.55753  | 0.1431   | -0.05339 | 0.06229  | -0.11414 | -0.34097 | 0.02435  | 0.26501  | 0.22872  | 0.34898  | 0.26314  | 0.37382  | 0.39164  |
| PFD0710w    | 0.09719  | -0.28898 | -1.11122 | -0.41835 | -0.57892 | -0.60482 | -0.32732 | -0.17385 | -0.32553 | -0.0501  | -0.17467 | -0.08709 | -0.09244 | -0.03267 | 0.01103  | 0.41166  | 0.22077  | 0.99378  | 0.86879  | 0.84728  | 0.57655  | 0.91228  | 0.68188  |          |
| PFI0910w    | -0.64635 | -0.67036 | -0.4314  | -0.37187 | -0.13324 | 0.30784  | 0.40874  | 0.35724  | 0.35254  | 0.36727  | 0.54686  | 0.57087  | 0.5025   | 0.45478  | 0.46122  | 0.37722  | 0.24815  | 0.09608  | 0.0725   | -0.17902 | -0.41662 | -0.5272  | -0.592   | -0.581   |
| PFA0135w    | 1.68584  | 1.37261  | 1.19346  | 1.02421  | 0.85428  | 0.50675  | 0.19702  | 0.2105   | -0.38762 | -0.54367 | -0.63344 | -0.84218 | -1.05727 | -1.07461 | -1.15947 | -1.22498 | -1.12713 | -1.08059 | 0.38532  | 0.71871  | 1.19778  | 1.17586  | 1.48435  | 1.78173  |
| PFI0920c    | 0.92021  | 0.78335  | 0.85014  | 1.57666  | 1.33629  | 1.5209   | 1.23206  | 1.60161  | 1.4896   | 1.15844  | 0.99326  | 0.80788  | 0.40883  | 0.16     | -0.15126 | -0.41171 | -0.86164 | -0.55602 | -0.40284 | -0.59183 | -0.52994 | 0.16311  | 0.32874  | 0.49942  |
| PFI0845w    | 0.53108  | 0.13744  | -0.47441 | -0.49228 | -0.95788 | -1.20396 | -1.31959 | -1.45829 | -1.49529 | -1.46968 | -1.54551 | -1.4437  | -1.35064 | -1.15505 | -0.27337 | 0.44656  | 0.81443  | 0.78183  | 1.86079  | 1.33197  | 1.18226  | 0.62642  | 0.87076  | 0.37738  |
| MAL13P1.162 | -0.35844 | -0.14684 | -0.18225 | -0.0626  | -0.06555 | -0.00029 | 0.07905  | 0.25133  | 0.41205  | 0.48619  | 0.58373  | 0.65978  | 0.48505  | 0.3081   | 0.33851  | 0.18159  | 0.04752  | -0.20728 | -0.00496 | -0.16498 | -0.19296 | -0.14124 | -0.27144 | -0.24544 |
| PFI1485c    | 0.32684  | 0.18518  | 0.17874  | 0.08567  | 0.08999  | -0.24497 | -0.35314 | -0.41796 | -0.58032 | -0.7307  | -0.88058 | -0.97276 | -1.17631 | -0.93646 | -0.87729 | -0.51146 | 0.24424  | 0.16944  | 0.41511  | 0.65871  | 0.75927  | 0.60668  | 0.54619  | 0.42191  |
| PF14_0545   | -0.84852 | -0.87243 | -0.45251 | -0.45772 | -0.24762 | -0.19177 | -0.33469 | -0.3582  | -0.4299  | -0.26606 | 0.44867  | 0.65238  | 0.40889  | 0.42854  | 0.66216  | 0.68227  | 0.37185  | 0.26594  | 0.57979  | 0.24975  | -0.42618 | -0       |          |          |

|             |          |          |          |          |          |          |          |          |          |          |          |          |          |          |          |          |          |          |          |          |          |          |          |          |
|-------------|----------|----------|----------|----------|----------|----------|----------|----------|----------|----------|----------|----------|----------|----------|----------|----------|----------|----------|----------|----------|----------|----------|----------|----------|
| PF14 0066   | 0.46407  | -0.4157  | -0.33406 | -0.01775 | -0.04291 | 0.06128  | -0.12257 | 0.47134  | 0.64924  | 0.61916  | 0.75468  | 0.6936   | 0.54908  | 0.34044  | 0.10894  | 0.05259  | -0.10784 | 0.21858  | 0.41478  | 0.42677  | 0.52875  | 0.16713  | 0.34167  | 0.33021  |
| PF08 0043   | -0.07878 | 0.23933  | 0.52536  | 0.22738  | 0.14951  | 0.228    | -0.10804 | 0.38918  | -0.1114  | 0.01479  | -0.00496 | -0.01521 | 0.17144  | -0.0242  | 0.37239  | 0.36235  | 0.05952  | 0.02283  | 0.2779   | -0.30984 | -0.27118 | -0.25158 | -0.09619 | 0.0331   |
| PF07 0082   | 0.17753  | 0.37737  | 0.63489  | 0.37098  | 0.45101  | 0.4916   | 0.48098  | 0.66342  | -0.22321 | 0.3172   | 0.11211  | 0.1991   | 0.35749  | 0.65745  | 0.4716   | 0.31328  | 0.17541  | 0.2125   | -0.37974 | -0.11593 | -0.19065 | -0.11462 | -0.3079  | -0.18814 |
| PFC0680w    | -0.21756 | -0.18719 | 0.04034  | -0.3412  | -0.43115 | -0.49869 | -0.51596 | -0.5026  | -0.50656 | -0.18604 | 0.07857  | 0.10241  | 0.31114  | 0.22032  | 0.12238  | 0.08267  | 0.12185  | 0.31243  | 0.24669  | 0.40247  | 0.71388  | 0.89574  | 0.79022  | 0.81278  |
| PFL2015w    | 0.43575  | 0.68654  | 0.68435  | 0.66285  | 0.36378  | 0.39429  | 0.40535  | 0.17489  | 0.23588  | 0.04091  | -0.04219 | -0.07449 | -0.00953 | 0.02803  | 0.15099  | 0.198    | 0.25842  | 0.14109  | -0.06558 | 0.11445  | 0.29351  | 0.38982  | 0.35138  | 0.35499  |
| PF11820w    | 0.13567  | 0.07719  | -0.16725 | 0.35616  | 0.58085  | 0.66701  | 0.84168  | 1.08953  | 1.04212  | 0.84544  | 0.65814  | 0.37752  | 0.10078  | 0.21027  | 0.2581   | 0.2965   | -0.10985 | 0.13309  | 0.2067   | 0.1176   | 0.05887  | -0.08149 | -0.33331 | -0.08489 |
| PFE1510c    | -0.54957 | -0.9542  | -1.01908 | -1.10582 | -0.93934 | -1.06915 | -1.15292 | -1.03655 | -0.85445 | -0.42991 | 0.05548  | 0.2826   | 0.52944  | 0.76361  | 0.62465  | 0.68442  | 0.28017  | 0.49734  | 0.33889  | 0.26747  | -0.30681 | -0.40458 | -0.5155  | -0.6676  |
| PF14 0774   | -0.00469 | -0.44262 | -0.55447 | -0.72133 | -0.64573 | -0.85426 | -0.91413 | -0.8478  | -1.28915 | -1.23552 | -0.86857 | -0.99239 | -0.75176 | -0.61057 | 0.12346  | 0.55297  | 0.69281  | 0.45538  | 1.08212  | 0.40688  | 0.48929  | 0.48186  | 0.30037  | 0.00699  |
| PF11 0442   | 1.04805  | 0.31076  | -0.10043 | -0.62967 | -0.75022 | -1.21129 | -1.56118 | -1.82536 | -2.40282 | -2.83917 | -2.99723 | -3.21009 | -3.15858 | -3.22864 | -3.15848 | -2.48819 | -1.1652  | -0.09551 | 1.06441  | 1.33364  | 1.57313  | 1.35657  | 1.45989  | 1.55376  |
| PFD0940w    | -0.20015 | -0.78389 | -0.91098 | -1.3257  | -1.2397  | -0.97066 | -1.47134 | -1.73408 | -1.80252 | -1.86311 | -1.89097 | -1.39998 | -1.00997 | -0.18562 | 0.34034  | 0.90036  | 1.20321  | 1.04001  | 0.80925  | 1.14637  | 0.82374  | 0.42064  | -0.15933 | -0.71316 |
| PFL0675c    | 0.75362  | 0.79729  | 0.6767   | 0.92611  | 1.04792  | 0.93614  | 0.83358  | 0.88084  | 0.4879   | 0.26423  | 0.26312  | 0.08869  | -0.06249 | -0.27859 | -0.52059 | -0.74844 | -0.90385 | -1.16719 | -1.03352 | -0.54985 | -0.17275 | -0.00802 | 0.37711  | 0.73714  |
| PFF1095w    | -0.56677 | -0.11391 | 0.25221  | 0.45951  | 0.55359  | 0.60258  | 0.61193  | 0.59538  | 0.55722  | 0.63543  | 0.69945  | 0.72096  | 0.69759  | 0.53651  | 0.32478  | -0.03435 | -0.31098 | -0.65485 | -1.02058 | -1.20581 | -1.21608 | -0.92671 | -0.8516  | -0.74735 |
| PF11 0454   | 0.15904  | 0.47366  | 0.38723  | 0.69994  | 0.75508  | 0.92047  | 0.75399  | 1.39451  | 1.18843  | 0.94166  | 1.27927  | 1.04282  | 0.77505  | 0.55118  | 0.44947  | 0.37207  | -0.75725 | -0.00054 | -0.02495 | -0.40887 | -0.44254 | -0.37236 | -0.20087 | -0.1172  |
| PF10740c    | -0.46405 | -0.13627 | 0.14001  | -0.0062  | -0.05609 | 0.16896  | 0.08865  | 0.01065  | -0.20737 | 0.03898  | 0.54222  | 0.55847  | 0.54934  | 0.44645  | 0.62371  | 0.44153  | -0.13977 | -0.22349 | -0.08983 | -0.8485  | -1.00159 | -0.75475 | -0.7821  | -0.58172 |
| PFL0280c    | -2.28366 | -2.14847 | -1.84096 | -2.31596 | -2.22861 | -2.12371 | -1.47065 | -0.82904 | -0.23209 | 0.2508   | 0.51446  | 0.79866  | 0.93931  | 0.94049  | 0.73473  | 0.36318  | -0.19758 | -0.36871 | -0.8484  | -1.24237 | -1.55449 | -1.54129 | -1.62381 | -1.76138 |
| PFF0725w    | 0.73053  | 1.18709  | 1.29749  | 0.96532  | 1.08055  | 1.15258  | 0.94757  | 0.88128  | 0.5758   | 0.43444  | 0.63169  | 0.36791  | 0.35182  | -0.04146 | -0.03699 | -0.19684 | -0.25604 | -0.68174 | -0.40045 | -0.56596 | -0.27357 | 0.02969  | 0.16823  | 0.59384  |
| PF11070c    | 0.80975  | 1.05564  | 1.08994  | 1.1589   | 1.24444  | 1.29234  | 1.19951  | 1.31439  | 1.28913  | 1.05967  | 1.10133  | 0.77893  | 0.55661  | 0.07815  | -0.01473 | -0.35363 | -0.96814 | -0.77015 | -0.70059 | -0.77837 | -0.3693  | -0.01687 | 0.3013   | 0.62856  |
| PF13 0335   | -0.52176 | -0.19998 | 0.20537  | 0.03731  | 0.04894  | 0.13642  | 0.09615  | 0.05087  | 0.0548   | 0.1204   | 0.30769  | 0.26749  | 0.39741  | 0.36949  | 0.53023  | 0.31623  | 0.32267  | 0.01402  | -0.12943 | -0.33949 | -0.27006 | -0.50349 | -0.41057 | -0.3401  |
| PF14 0328   | -0.82238 | -0.67949 | -0.36799 | 0.06253  | 0.05971  | 0.62895  | 0.85707  | 1.22468  | 1.25386  | 1.50727  | 1.66315  | 1.65027  | 1.21996  | 0.66694  | 0.29432  | 0.10498  | -0.51193 | -0.4469  | -0.12889 | -0.55665 | -0.40821 | -0.22152 | -0.19665 | -0.3344  |
| PF14 0154   | -0.86852 | -1.02804 | -0.39981 | -0.54931 | 0.0469   | 0.47261  | 0.62942  | 0.76523  | 0.49798  | 0.5423   | 0.54388  | 0.58159  | 0.62005  | 0.70681  | 0.58398  | 0.49014  | 0.42268  | 0.20773  | 0.15163  | -0.00658 | -0.33497 | -0.42884 | -0.56983 | -0.69031 |
| PFC0135c    | -0.46709 | -0.47991 | -0.35217 | -0.12737 | 0.04423  | 0.07824  | -0.04361 | -0.26233 | -0.18995 | 0.00575  | 0.28035  | 0.44246  | 0.51465  | 0.62033  | 0.37526  | 0.20848  | -0.06246 | -0.02993 | -0.25545 | -0.43621 | -0.66534 | -0.68969 | -0.61353 | -0.66792 |
| PFE0795c    | -0.72845 | -1.04688 | -0.88927 | -0.69339 | -0.62403 | -0.33887 | -0.17943 | -0.18777 | 0.13884  | 0.3279   | 0.51763  | 0.66546  | 0.38804  | 0.24216  | 0.23986  | 0.32238  | 0.3104   | 0.00761  | 0.8426   | 0.27678  | 0.01982  | -0.36458 | -0.19796 | -0.33425 |
| PFL0670c    | -0.36656 | 0.02404  | 0.31052  | 0.54198  | 0.57821  | 0.59595  | 0.4009   | 0.54634  | 0.64956  | 0.74987  | 0.77788  | 0.94342  | 0.87954  | 0.4921   | 0.32153  | 0.01567  | -0.57146 | -0.70355 | -0.87763 | -1.09405 | -1.058   | -1.02392 | -0.63172 | -0.47564 |
| PFE1080w    | -0.91173 | -0.62991 | -0.16602 | -0.30138 | -0.18738 | 0.33394  | 0.50154  | 0.65171  | 0.69224  | 0.78023  | 0.80235  | 0.8104   | 0.80684  | 0.68084  | 0.61293  | 0.3783   | 0.20514  | -0.03185 | -0.25911 | -0.56269 | -0.85441 | -0.81775 | -0.81284 | -0.65077 |
| PF14 0730   | -3.40916 | -1.84127 | -1.53579 | -1.30331 | 0.09808  | 1.33593  | 2.21     | 2.6082   | 2.07732  | 1.12777  | 0.97771  | 0.38007  | -0.60602 | -1.78511 | -0.00307 | -1.51917 | -2.86467 | -2.56859 | -2.60328 | -3.39646 | -3.42328 | -2.68724 | -2.9231  | -2.53992 |
| PF11190w    | -0.29359 | -0.04567 | -0.03056 | 0.25753  | 0.51572  | 0.49342  | 0.46724  | 0.71328  | 0.70899  | 0.76897  | 0.74431  | 0.63096  | 0.52887  | 0.50937  | 0.37115  | 0.14036  | 0.03176  | -0.11859 | -0.11334 | -0.12736 | -0.25901 | -0.39047 | -0.28902 | -0.10804 |
| MAL13P1.49  | 0.19443  | -0.16254 | -0.41646 | -1.04257 | -1.32851 | -1.40168 | -1.87415 | -2.06938 | -2.73921 | -3.40215 | -3.23219 | -3.3983  | -3.60306 | -3.02788 | -1.6703  | -0.11935 | 0.64858  | 0.42049  | 1.64512  | 0.94989  | 1.00142  | 0.69898  | 0.64065  | 0.28956  |
| PF13 0160   | -0.60836 | -0.93282 | -0.69535 | -1.59341 | -1.90263 | -2.19458 | -2.3699  | -2.3162  | -2.02637 | -1.66585 | -1.25105 | -0.75186 | -0.42349 | -0.35395 | 0.3333   | 0.69336  | 0.56282  | 0.95476  | 0.87907  | 0.61631  | 0.35275  | -0.16319 | -0.35163 | -0.6122  |
| PF11 0145   | -0.23057 | -0.09219 | 0.35503  | 0.81918  | 0.95651  | 1.33052  | 1.25541  | 1.17318  | 1.14604  | 0.9862   | 0.91332  | 0.96509  | 0.93374  | 0.69041  | 0.51487  | 0.29574  | -0.05771 | -0.09915 | -0.23136 | -0.45107 | -0.78076 | -0.69198 | -0.61861 | -0.42743 |
| PFF1385c    | 0.13098  | 0.45305  | 0.63447  | 0.60122  | 0.75396  | 0.85352  | 0.80838  | 0.7989   | 0.80511  | 0.67154  | 0.54483  | 0.51429  | 0.35347  | 0.19239  | 0.06374  | -0.02967 | -0.18327 | -0.24209 | -0.09237 | -0.41058 | -0.47053 | -0.19845 | -0.04714 | 0.11662  |
| PFL2210w    | 0.25738  | 0.28828  | 0.45419  | 0.75066  | 1.07125  | 0.88126  | 0.68643  | 0.58105  | 0.32622  | 0.39347  | 0.65005  | 0.46212  | 0.56869  | 0.44652  | 0.19544  | 0.12742  | 0.14627  | 0.18444  | 0.20991  | 0.1938   | 0.32542  | 0.14119  | 0.43869  | 0.77767  |
| PF11 0192   | 0.62421  | 0.66201  | 0.5253   | 0.70803  | 0.63441  | 0.59934  | 0.47951  | 0.46197  | 0.48817  | 0.30192  | 0.39142  | 0.17321  | 0.16866  | -0.15583 | -0.22951 | -0.42458 | -0.4193  | -0.31171 | -0.08094 | 0.07212  | 0.34402  | 0.22768  | 0.48653  | 0.7156   |
| PF14 0027   | -0.29232 | 0.22075  | 0.42674  | 0.71405  | 0.55179  | 0.85604  | 0.81147  | 1.02111  | 0.95266  | 0.90511  | 1.04741  | 1.0083   | 0.76613  | 0.4132   | 0.32028  | 1.2619   | -0.91405 | -0.83764 | -0.91682 | -1.36356 | -1.42195 | -1.10463 | -0.8137  | -0.58197 |
| PFL1225c    | 0.83115  | 1.3813   | 1.04755  | 0.93047  | 1.10365  | 0.97667  | 0.79342  | 1.04609  | 0.9489   | 0.86052  | 0.63211  | 0.33261  | 0.02395  | -0.49326 | -0.54864 | -0.84367 | -0.91446 | -0.84043 | -0.49665 | -0.29672 | 0.09636  | 0.33883  | 0.56668  | 0.80774  |
| PF11 0428   | -0.81672 | -0.45093 | -0.1825  | -0.13804 | -0.16529 | 0.33905  | 0.23227  | 0.51085  | 0.68298  | 0.79842  | 0.73704  | 1.25309  | 0.85952  | 0.6737   | 0.53097  | 0.34848  | 0.03066  | -0.02325 | -0.12051 | -0.65131 | -0.77435 | -0.90525 | -0.97413 | -0.90539 |
| PF11 0361   | -0.25877 | -0.28397 | -0.51484 | -0.19864 | -0.36461 | -0.37756 | -0.44929 | -0.2959  | -0.17931 | 0.07356  | 0.54843  | 0.60128  | 0.69231  | 0.60708  | 0.62128  | 0.54327  | 0.44756  | 0.19909  | 0.22597  | -0.05352 | -0.1445  | -0.19674 | -0.40555 | -0.15011 |
| MAL13P1.196 | 0.0383   | -0.07723 | -0.35443 | -0.35902 | -0.45767 | -0.62669 | -0.90179 | -0.76445 | -0.60255 | -0.14205 | 0.04744  | 0.27484  | 0.51836  | 0.69806  | 0.6677   | 0.72294  | 0.53644  | 0.67522  | 0.53458  | 0.31853  | 0.20864  | 0.00368  | -0.14389 | -0.229   |
| PF13 0278   | -0.04949 | 0.75148  | 0.89726  | 1.13574  | 1.22366  | 1.28823  | 1.31275  | 1.07615  | 0.94658  | 0.77272  | 0.61379  | 0.42115  | 0.37772  | 0.3597   | 0.22576  | 0.08767  | 0.12701  | -0.16105 | -0.24732 | -0.32987 | -0.34984 | -0.36965 | -0.19966 | 0.13852  |
| PF14 0719   | -0.65998 | -0.21975 | 0.19991  | 0.43547  | 0.65094  | 0.90713  | 1.05932  | 0.82253  | 0.57911  | 0.34162  | 0.35533  | 0.26659  | 0.14973  | 0.17005  | 0.20594  | 0.13543  | -0.05194 | -0.02812 | -0.21029 | -0.38171 | -0.67135 | -0.71353 | -0.8937  | -0.74411 |
| PFD0900w    | 0.7504   | 0.23812  | -0.20867 | -0.878   | -1.00598 | -1.5687  | -1.82497 | -2.1335  | -2.72279 | -2.89519 | -2.95285 | -3.27523 | -3.18021 | -3.35929 | -3.1982  | -2.50376 | -0.91781 | 0.03366  | 1.25736  | 1.37851  | 1.47636  | 1.23739  | 1.26512  | 1.22254  |
| MAL7P1.18   | -0.59341 | -0.84033 | -0.91804 | -1.35183 | -1.526   | -1.57536 | -1.62707 | -1.8821  | -1.93583 | -2.35447 | -2.70414 | -2.78612 | -2.10931 | -0.91623 | 0.59982  | 1.05775  | 1.2952   | 1.23905  | 0.69522  |          |          |          |          |          |

|                |          |          |          |          |          |          |          |          |          |          |          |          |          |          |          |          |          |          |          |          |          |          |          |          |
|----------------|----------|----------|----------|----------|----------|----------|----------|----------|----------|----------|----------|----------|----------|----------|----------|----------|----------|----------|----------|----------|----------|----------|----------|----------|
| PFF1260c       | -0.50295 | -0.40013 | -0.14232 | 0.57985  | 0.89086  | 1.02096  | 1.09374  | 1.19241  | 1.02777  | 1.10042  | 0.90971  | 0.81179  | 0.52383  | 0.547    | 0.09282  | -0.03095 | -0.26623 | -0.42563 | -0.63302 | -0.5544  | -0.73882 | -0.75483 | -0.66174 | -0.55742 |
| PFD0965w       | -0.45957 | -0.30074 | 0.39627  | 0.05869  | 0.08021  | 0.37904  | 0.45198  | -0.18149 | -0.36705 | -0.41451 | -0.77618 | -0.76567 | -0.38107 | 0.09973  | 0.10287  | 0.18591  | 0.5635   | 0.25204  | -0.48409 | 0.00042  | -0.14901 | -0.15009 | -0.3076  | -0.34362 |
| MAL8P1.143     | -0.56508 | 0.27669  | -0.72193 | 0.32607  | 0.0468   | 0.01499  | -0.04892 | -0.22098 | -0.25773 | -0.41457 | -0.54983 | -0.4384  | -0.27477 | -0.04869 | 0.13815  | 0.38585  | 0.76093  | 0.70292  | -0.75753 | 0.66024  | 0.68822  | 0.52095  | 0.31635  | 0.03909  |
| PF13_0268      | -0.57451 | 0.20519  | 0.53535  | 0.35667  | 0.52502  | 0.46417  | 0.31881  | 0.42818  | 0.56869  | 0.57054  | 0.70326  | 0.65215  | 0.31948  | 0.24369  | 0.04581  | -0.1318  | -0.90417 | -0.70688 | -1.30054 | -1.51315 | -1.50918 | -1.23663 | -1.02847 | -0.75692 |
| PFB0660w       | 0.64548  | 0.92932  | 1.19257  | 1.26456  | 1.19856  | 1.27438  | 1.2781   | 1.27446  | 1.01954  | 0.8664   | 0.92101  | 0.97028  | 0.32658  | 0.12662  | 0.0371   | -0.02626 | -0.28997 | -0.40696 | -0.23682 | -0.30596 | -0.24244 | -0.17295 | 0.08826  | 0.37884  |
| PFI0890c       | -0.25006 | -0.28071 | -0.39336 | -0.30151 | -0.27664 | -0.35059 | -0.44265 | -0.19334 | -0.11999 | -0.00949 | 0.14255  | 0.16887  | 0.35529  | 0.32323  | 0.58398  | 0.67529  | 0.25391  | 0.66933  | 0.61584  | 0.20351  | -0.07405 | -0.32169 | -0.5193  | -0.39133 |
| PFI0745w       | -0.16325 | 0.28347  | 0.36012  | 0.3502   | 0.61781  | 0.69747  | 0.71765  | 0.55575  | 0.57567  | 0.5839   | 0.86086  | 0.6617   | 0.49438  | 0.37407  | 0.20047  | -0.01919 | 0.06376  | -0.0969  | -0.10675 | -0.40423 | -0.21477 | -0.03597 | 0.0488   |          |
| PFB0685c       | -0.32967 | -0.12145 | -0.01961 | 0.07412  | 0.39575  | 0.35889  | 0.48391  | 0.42236  | 0.49973  | 0.33973  | 0.2102   | 0.02459  | 0.2861   | 0.35656  | 0.06597  | 0.01265  | -0.1876  | 0.05177  | -0.45703 | 0.01807  | 0.02272  | 0.37609  | 0.36379  | 0.3843   |
| MAL8P1.55      | -0.5183  | -0.93763 | -0.60411 | -0.90132 | -0.82408 | -0.95386 | -1.01312 | -0.85509 | -0.18743 | 0.28112  | 0.53517  | 0.7137   | 0.81319  | 0.80793  | 0.53305  | 0.42201  | 0.65834  | 0.20523  | -0.05371 | -0.05686 | -0.17043 | -0.24639 | -0.45329 | -0.92655 |
| PFB0177c       | -0.52759 | -0.37421 | -0.61963 | -0.53985 | -0.29443 | -0.42579 | -0.47612 | -0.29565 | -0.36252 | 0.17312  | 0.42247  | 0.36528  | 0.56829  | 0.57798  | 0.55481  | 0.49316  | 0.39751  | 0.36921  | 0.29977  | 0.10358  | 0.04437  | -0.02416 | 0.06799  | 0.17025  |
| PF14_0561      | 0.79963  | 1.10094  | 1.29837  | 1.67397  | 1.65274  | 1.59749  | 1.56185  | 1.46478  | 1.2778   | 1.1608   | 0.88966  | 0.74926  | 0.5656   | 0.3783   | 0.18629  | -0.1413  | -0.21221 | -0.54038 | -0.62089 | -0.58596 | -0.4111  | 0.10174  | 0.34328  | 0.61887  |
| PFF1235w       | 0.66805  | 0.5106   | 0.22516  | 0.59536  | 0.86706  | 0.32778  | 0.29923  | 0.92985  | 0.628    | 0.64486  | 0.44324  | 0.32678  | -0.60645 | -0.73082 | -0.57902 | -0.4689  | -0.04225 | 0.30976  | 0.3213   | 0.71021  | 0.41666  | 0.72574  | 0.85455  | 0.99506  |
| PF11_0342      | -1.07749 | -1.19613 | -1.03896 | -1.52968 | -1.63518 | -1.80458 | -1.80799 | -1.91483 | -1.58154 | -0.97115 | -0.64458 | -0.04664 | 0.46707  | 0.79305  | 0.91715  | 0.75951  | 0.94431  | 0.61172  | -0.2128  | -0.01359 | -0.06061 | -0.39532 | -0.67307 | -1.09984 |
| PFE0660c       | -2.23009 | -2.22994 | -1.69756 | -1.992   | -2.04763 | -1.84056 | -1.66161 | -0.96736 | -0.31812 | 0.86382  | 1.62482  | 1.63953  | 1.16558  | 0.97521  | 0.5342   | 0.25595  | -0.30262 | -0.63624 | -1.56731 | -2.45368 | -2.7965  | -2.75955 | -0.3336  | -2.51703 |
| PFI1195c       | 0.64732  | 0.18793  | -0.32384 | -0.14152 | -0.03556 | -0.45898 | -0.66675 | -0.63059 | -0.65093 | -0.44759 | -0.36451 | -0.08149 | 0.00231  | 0.04238  | 0.28254  | 0.34406  | 0.09649  | 0.59861  | 0.97039  | 0.75167  | 0.82734  | 0.23717  | 0.43755  | 0.71142  |
| PF13_0350      | 0.36987  | 0.30865  | 0.07997  | 0.00918  | -0.06333 | -0.37367 | -0.10715 | 0.02677  | 0.03298  | 0.02695  | -0.04775 | 0.02308  | -0.04695 | -0.15599 | -0.14366 | -0.38528 | -0.52107 | -0.20635 | -0.1677  | 0.07447  | 0.13915  | 0.30859  | 0.27327  | 0.41989  |
| PFF0885w       | -1.1434  | -0.37942 | -0.05822 | 0.02456  | -0.08985 | 0.29003  | 0.08512  | 0.27081  | 0.32352  | 0.27626  | 0.52492  | 0.33838  | 0.49457  | 0.1346   | 0.37151  | 0.11859  | -0.6126  | -0.63361 | -0.96529 | -1.80128 | -1.94639 | -1.27861 | -1.20293 | -1.22893 |
| PF10_0223      | 1.46271  | 0.67162  | 0.09473  | -0.2846  | -0.55894 | -0.9646  | -1.19824 | -1.32732 | -1.92691 | -2.11887 | -2.01295 | -2.39129 | -2.28663 | -2.34313 | -1.85868 | -1.39963 | -0.75025 | -0.26507 | 0.10907  | 0.9725   | 0.95583  | 1.13379  | 1.07355  | 1.18561  |
| PFI0775w       | 0.00948  | 0.27377  | 0.15265  | 0.18987  | 0.28334  | 0.0902   | 0.17272  | 0.22102  | -0.21179 | -0.16596 | -0.22784 | -0.23054 | -0.46957 | -0.49658 | -0.22815 | -0.04954 | 0.03796  | 0.46658  | 0.50321  | 0.76411  | 0.95212  | 0.92461  | 1.14425  | 1.21265  |
| PFI0475w       | -0.06166 | 0.23046  | 0.32626  | 0.19449  | 0.45329  | 0.48825  | 0.43641  | 0.5494   | 0.43417  | 0.25     | 0.63665  | 0.44274  | 0.34775  | -0.04472 | -0.01242 | -0.16264 | -0.34619 | -0.63158 | -0.42782 | -0.85419 | -0.53484 | -0.58539 | -0.43311 | 0.03356  |
| PF13_0069      | 1.19909  | 1.46967  | 0.98701  | 1.37383  | 0.62951  | 0.24706  | -0.37798 | 0.06964  | -0.62989 | -0.4266  | -0.04064 | 0.37372  | 0.3734   | 0.41812  | -0.63775 | -1.01226 | -1.11877 | -1.12246 | -0.32713 | -0.2369  | -0.03652 | -0.16846 | 0.41691  |          |
| PF14_0205      | -0.66121 | -0.24905 | 0.26064  | 0.50936  | 0.49684  | 0.68769  | 0.44421  | 0.84613  | 0.10493  | 0.77124  | 0.89526  | 0.85331  | 0.738    | 0.34296  | 0.1206   | 0.01346  | -0.64542 | -0.65786 | -1.06068 | -1.59973 | -1.7093  | -1.116   | -1.10565 | -0.90372 |
| PF14_0303      | 0.31202  | -0.00273 | -0.4013  | -0.57734 | -0.91915 | -1.18306 | -1.38184 | -1.57579 | -1.82719 | -2.06568 | -2.2253  | -2.23456 | -1.94621 | -1.20201 | -0.2944  | 0.45659  | 0.8891   | 1.10687  | 0.78686  | 1.30555  | 1.20269  | 0.7135   | 0.47577  | -0.1736  |
| PF10_0064      | -0.80976 | -0.70251 | -0.84818 | -0.51879 | -0.83336 | -0.41084 | -0.03076 | 0.42602  | 0.71305  | 0.7269   | 1.04439  | 1.03584  | 0.97244  | 0.71599  | 0.46599  | 0.23548  | 0.18062  | 0.05493  | -0.2426  | -0.49261 | -0.56342 | -0.55562 | -0.57291 | -0.36157 |
| PFI0630w       | -0.68562 | -0.27754 | -0.3793  | -0.17171 | -0.19522 | -0.13351 | -0.16575 | 0.04626  | -0.06666 | 0.03627  | 0.20533  | 0.26834  | 0.2151   | 0.27187  | 0.52014  | 0.62412  | 0.162    | 0.08611  | -0.04525 | -0.40681 | -0.51526 | -0.63806 | -0.75313 | -0.88352 |
| MAL3_tRNA Ile1 | 0.90611  | 1.32622  | 1.09621  | 0.99116  | 0.88231  | 0.76108  | 0.76632  | 1.75662  | 1.21763  | 0.88465  | 1.04023  | 1.13479  | -0.00262 | -0.23626 | -0.87076 | -0.30983 | -1.08719 | -0.01289 | -0.1607  | -0.28526 | -0.90888 | 0.40947  | -0.6296  | -0.58746 |
| PFB0935w       | 0.12387  | -0.52778 | -1.06786 | -1.20777 | -1.41191 | -1.72748 | -2.05675 | -2.16175 | -2.19063 | -2.08931 | -2.10921 | -2.07341 | -2.15248 | -1.90981 | -0.70497 | 0.53328  | 1.3111   | 1.02284  | 1.14212  | 1.08314  | 0.98257  | 0.81879  | 0.53386  | -0.15789 |
| PFC10_API0034  | -0.54303 | -1.13886 | -1.24554 | -1.20827 | -0.5369  | -0.82854 | -1.64427 | -0.54814 | -1.24988 | -0.62485 | -0.62542 | -0.68056 | -0.45769 | 0.10828  | 0.36651  | 0.93323  | 0.98688  | 1.06284  | 0.2854   | 0.50079  | 0.47588  | 1.16923  | 0.12846  | -0.1223  |
| PFL1540c       | -0.6515  | -0.77491 | -0.79004 | -0.96955 | -1.07252 | -0.87447 | -0.42425 | 0.07679  | 0.34842  | 0.36121  | 0.21928  | 0.42558  | 0.48923  | 0.62956  | 0.60971  | 0.5397   | 0.23881  | 0.43591  | 0.15314  | 0.05904  | -0.26753 | -0.55184 | -0.56475 | -0.62703 |
| PF14_0578      | 0.17964  | -0.34291 | -0.85859 | -1.28997 | -1.48784 | -1.96112 | -2.11618 | -2.2957  | -2.74789 | -3.05999 | -2.79624 | -2.8214  | -2.67729 | -2.59105 | -1.817   | -1.09442 | -0.30622 | -0.04855 | 1.3674   | 1.09302  | 0.94698  | 0.4238   | 0.87765  | 0.99878  |
| PFC0970w       | 0.61124  | 0.66099  | 0.7296   | 0.71867  | 0.70784  | 0.4184   | 0.35772  | 0.25149  | 0.29479  | 0.15787  | -0.00778 | -0.08515 | -0.02443 | 0.14746  | 0.17903  | 0.06564  | 0.25018  | -0.15615 | -0.1277  | -0.03253 | 0.01603  | 0.15324  | 0.25236  | 0.34838  |
| PF07_0023      | -0.67975 | -0.86991 | -0.95607 | -1.35186 | -1.46947 | -1.57621 | -1.67478 | -1.59752 | -1.31315 | -0.78695 | -0.10312 | 0.32588  | 0.62792  | 0.70784  | 1.0807   | 1.1027   | 0.56033  | 0.63379  | 0.7724   | 0.24873  | 0.24838  | -0.20813 | -0.42158 | -0.79033 |
| PF13_0054      | -1.30443 | -1.31118 | -0.99378 | -1.15338 | -1.19686 | -0.93863 | -0.69328 | 0.11956  | 0.50648  | 0.80081  | 1.2006   | 1.19719  | 1.11706  | 0.80687  | 0.55343  | 0.22589  | 0.10067  | -0.38344 | -0.54341 | -0.88746 | -0.88763 | -0.93723 | -1.04999 | -0.92442 |
| PFI11_0116     | 0.72845  | 0.69444  | 0.87655  | 0.88329  | 0.93507  | 1.15088  | 1.18476  | 1.19684  | 1.17681  | 0.9919   | 0.99096  | 0.80347  | 0.56118  | 0.27536  | 0.07022  | -0.14138 | -0.16553 | -0.36528 | -0.27325 | -0.40683 | -0.26797 | 0.03773  | 0.23939  | 0.35201  |
| PFF0200c       | -0.83529 | -1.14159 | -1.08688 | -1.72905 | -2.18606 | -2.26875 | -2.64765 | -3.07582 | -3.17757 | -3.41212 | -3.64334 | -3.61866 | -2.81622 | -1.66401 | 0.18856  | 1.06163  | 1.37285  | 1.16593  | 0.67655  | 0.81073  | 0.84159  | 0.43294  | -0.15992 | -0.91611 |
| PF11_0397      | 0.33457  | 0.64782  | 0.36832  | 0.64775  | 0.56639  | 0.53904  | 0.73929  | 0.33361  | 0.61092  | 0.43706  | 0.3262   | 0.65722  | 0.55912  | 0.50856  | 0.41276  | 0.17442  | 0.03628  | -0.02865 | -0.42581 | -0.41911 | -0.417   | -0.4768  | -0.34035 | -0.05053 |
| PFL1910c       | 0.59913  | 0.88938  | 1.1324   | 1.31336  | 1.58645  | 1.45206  | 1.23144  | 1.00888  | 0.73756  | 0.52123  | 0.55513  | 0.40037  | 0.37234  | 0.04696  | -0.13885 | -0.18965 | -0.6242  | 0.0866   | 0.32348  | 0.21241  | 0.65932  | 0.64598  | 1.14675  | 1.32326  |
| PF08_0053      | 1.27813  | 1.33925  | 0.99771  | 1.86895  | 1.7846   | 1.59969  | 1.66941  | 1.38604  | 1.02928  | 0.99365  | 0.71623  | 0.35806  | 0.08761  | -0.28751 | -0.37616 | -1.07099 | -0.67719 | -0.45865 | -0.52646 | -0.07059 | 0.06514  | 0.61356  | 0.97148  |          |
| PF11_0331      | -0.30954 | 0.14868  | 0.25826  | 0.33987  | 0.46247  | 0.54397  | 0.57656  | 0.81818  | 1.00437  | 0.91504  | 1.06208  | 1.10922  | 0.81816  | 0.33654  | 0.03409  | -0.3626  | -0.86959 | -0.96966 | -1.11339 | -1.30099 | -0.93229 | -0.58512 | -0.56424 | -0.24533 |
| PF14_0618      | -0.56002 | -0.6186  | -1.16685 | -0.70826 | -0.80808 | -0.82126 | -0.84901 | -1.0805  | -0.84259 | -0.31112 | 0.25494  | 0.26716  | 0.28189  | 0.42309  | 0.42813  | 0.56223  | 0.59723  | 0.41751  | 0.78895  | 0.48962  | 0.30637  | -0.01061 | -0.27879 | -0.47964 |
| PFL0895c       | 1.08054  | 1.18414  | 0.70348  | 1.03174  | 0.91723  | 0.54018  | 0.08739  | 0.00126  | -0.47507 | -0.69469 | -0.64765 | -0.87986 | -0.90117 | -1.20854 | -1.3696  | -1.07373 | -1.50893 | -0.29895 | 0.35649  | 0.55855  | 0.78175  | 0.96777  | 1.0232   |          |



|             |          |          |          |          |          |          |          |          |          |          |          |          |          |          |          |          |          |          |          |          |          |          |          |          |
|-------------|----------|----------|----------|----------|----------|----------|----------|----------|----------|----------|----------|----------|----------|----------|----------|----------|----------|----------|----------|----------|----------|----------|----------|----------|
| PFB0227c    | 0.08434  | 0.37696  | 0.47744  | 0.46672  | 0.49644  | 0.41764  | 0.58145  | 0.38891  | 0.43518  | -0.15764 | 0.05975  | 0.26185  | 0.30302  | 0.34348  | 0.2053   | 0.05045  | 0.23943  | 0.23972  | -0.20876 | 0.27411  | 0.4452   | 0.80181  | 0.72207  | 0.55264  |
| PF11240c    | -0.85517 | -0.90708 | -1.72456 | -0.96245 | -1.23426 | -1.17146 | -1.1158  | -0.68215 | -0.60001 | -0.23649 | -0.02867 | 0.10318  | 0.4896   | 0.5284   | 0.89533  | 0.86153  | 0.7304   | 0.66814  | 0.84733  | 0.2867   | -0.03624 | -0.21674 | -0.3968  | -0.7528  |
| MAL8P1.131  | -0.30413 | 0.1024   | 0.25908  | 0.39468  | 0.58502  | 0.74024  | 0.68152  | 0.86699  | 0.6281   | 0.56291  | 0.9499   | 0.80541  | 0.56603  | 0.2884   | 0.29335  | 0.18337  | -0.24091 | -0.29808 | -0.16321 | -0.66218 | -0.90991 | -0.83903 | -0.71638 | -0.33563 |
| PFC0700c    | 0.749    | 0.06418  | -0.21599 | -0.54706 | -0.8261  | -1.34628 | -1.4782  | -1.82164 | -2.35668 | -2.36543 | -2.49245 | -2.50709 | -2.48367 | -2.53501 | -2.42799 | -2.35381 | -1.58993 | -0.88869 | 1.20736  | 0.76943  | 1.00991  | 0.92588  | 1.09729  | 1.27454  |
| PF14 0655   | -0.3287  | -0.04231 | 0.12067  | 0.33156  | 0.04709  | 0.44103  | 0.31026  | 0.46444  | 0.75811  | 0.65873  | 0.79663  | 0.71782  | 0.52882  | 0.3865   | 0.44104  | -0.04437 | -0.6268  | -0.93919 | -1.09262 | -1.49292 | -1.25793 | -1.05163 | -0.78473 | -0.63334 |
| MAL13P1.261 | 0.09627  | 0.44914  | 0.77194  | 0.60236  | 0.48034  | 0.53445  | 0.46666  | 0.45907  | 0.27592  | 0.15147  | 0.17514  | 0.13359  | 0.172    | 0.24383  | 0.36614  | 0.24313  | 0.07561  | 0.18126  | -0.52759 | -0.29309 | -0.17655 | -0.39371 | -0.29979 | -0.2152  |
| PF14 0198   | -0.32679 | 0.21577  | 0.47456  | 0.44267  | 0.27864  | 0.5195   | 0.53374  | 0.67111  | 0.82415  | 0.90378  | 0.81281  | 0.86583  | 0.73667  | 0.43786  | 0.15539  | -0.20205 | -0.36533 | -0.95305 | -1.01316 | -1.40573 | -1.21899 | -0.65507 | -0.55359 | -0.39642 |
| PFL1175w    | 0.74606  | 0.96651  | 0.93315  | 1.09445  | 1.03926  | 0.97706  | 0.92035  | 1.02725  | 0.87239  | 0.73754  | 0.66183  | 0.34386  | 0.07511  | -0.32466 | -0.407   | -0.73222 | -0.78243 | -0.9306  | -0.8187  | -0.79174 | -0.3334  | -0.02245 | 0.26281  | 0.63064  |
| PFB0185w    | -0.40728 | -0.34121 | -0.18894 | -0.43956 | -0.3702  | -0.19312 | 0.04313  | 0.08602  | 0.71578  | 0.75037  | 0.66674  | 0.79085  | 0.70211  | 0.73551  | 0.54223  | 0.37273  | 0.41121  | 0.31552  | -0.12158 | 0.01208  | -0.24352 | -0.28082 | -0.32097 | -0.42997 |
| PF10 0188   | -0.32923 | -0.8158  | -1.29633 | -0.9516  | -0.91773 | -0.84581 | -1.11273 | -1.0729  | -1.00729 | -0.59331 | -0.23451 | -0.29216 | 0.13345  | 0.29746  | 0.50942  | 0.83028  | 0.86958  | 0.60928  | 0.87758  | 0.6141   | 0.33477  | 0.37777  | 0.14312  | -0.21065 |
| MAL7P1.172  | 0.88829  | 1.62048  | 1.67085  | 1.92807  | 1.78899  | 1.78106  | 1.44749  | 1.13899  | 0.77198  | 0.12346  | -0.52817 | -1.13522 | -1.67136 | -1.88199 | -2.08869 | -1.93815 | -1.84981 | -1.581   | -1.10065 | -0.77121 | -0.18354 | 0.31781  | 0.57296  | 0.61524  |
| MAL13P1.252 | 0.65926  | 1.0337   | 1.05984  | 1.49478  | 1.71107  | 1.56559  | 1.40458  | 1.61515  | 0.95312  | 0.58673  | 0.3974   | 0.14893  | 0.14484  | -0.01381 | -0.15117 | -0.26069 | -0.38465 | -0.20703 | -0.19219 | -0.02618 | 0.57139  | 0.54499  | 0.62659  | 0.86997  |
| PF14 0164   | 1.26319  | 0.83192  | 0.31048  | 0.32005  | 0.10566  | -0.26888 | -0.7414  | -0.51261 | -0.99004 | -0.9285  | -0.80875 | -1.05907 | -1.19789 | -1.50809 | -1.61493 | -1.60608 | -1.40948 | -1.15114 | 0.49771  | 0.76361  | 0.73005  | 0.68418  | 0.83769  | 1.26789  |
| PF11 0091   | -0.40882 | -1.07379 | -1.16454 | -1.32953 | -1.36975 | -0.68471 | -0.03118 | -0.21546 | -0.59602 | -0.48329 | -0.98829 | -1.38749 | -1.71425 | -1.88011 | -1.77132 | -0.55283 | 0.57628  | 0.21045  | 0.83883  | 0.79167  | 0.73742  | 0.52757  | 0.56141  | -0.08498 |
| PF13 0204   | -0.48246 | -0.07632 | 0.25587  | 0.2536   | 0.18787  | 0.44509  | 0.68128  | 0.86476  | 1.17009  | 1.12035  | 1.11542  | 1.01597  | 0.83699  | 0.32842  | 0.04343  | -0.35961 | -0.70704 | -0.81862 | -1.34708 | -1.34809 | -1.2414  | -0.84781 | -0.62219 | -0.38497 |
| PF11 0380   | 0.11178  | 0.3481   | 0.38596  | 0.51884  | 0.37927  | 0.47287  | 0.51094  | 0.40367  | 0.37546  | 0.07768  | 0.02454  | 0.4695   | 0.08333  | 0.14513  | 0.04526  | 0.21936  | -0.18605 | -0.36477 | -0.08133 | -0.40075 | -0.44317 | -0.23755 | 0.06071  | -0.12484 |
| PF11 0379   | 0.19518  | -0.15701 | -0.9318  | -0.60211 | -0.77021 | -1.38222 | -1.25341 | -1.38802 | -1.70434 | -1.9929  | -1.81492 | -1.85005 | -1.63239 | -1.46378 | -0.72281 | 0.11395  | 0.95918  | 0.48236  | 0.98172  | 1.10157  | 1.0957   | 1.06402  | 1.0203   | 0.70902  |
| PF10 0337   | 0.27154  | -0.38352 | -0.92683 | -0.94524 | -1.11046 | -1.45169 | -1.73054 | -1.83536 | -2.0282  | -1.62451 | -1.25474 | -1.03995 | -0.86793 | -0.70182 | 0.11615  | 0.57152  | 0.55668  | 0.95021  | 1.48964  | 1.20748  | 0.92772  | 0.42819  | 0.47319  | -0.04474 |
| PFB0610c    | -0.22226 | -0.06906 | 0.07903  | 0.29374  | 0.43715  | 0.66602  | 0.65632  | 0.57929  | 0.56472  | 0.60226  | 0.71784  | 0.70957  | 0.74469  | 0.42994  | 0.39119  | 0.26102  | 0.28566  | -0.06666 | 0.18598  | -0.17599 | -0.28505 | -0.22632 | -0.17177 | 0.0353   |
| PF14 0372   | 0.5408   | 0.25154  | 0.04494  | -0.02632 | 0.10218  | -0.21427 | -0.17937 | -0.42809 | -0.41653 | -0.30309 | -0.5017  | -0.41193 | -0.49392 | -0.12715 | -0.38016 | -0.43286 | -0.24811 | 0.1812   | 0.32927  | 0.5892   | 0.41756  | 0.4385   | 0.43497  | 0.65806  |
| PF11 0433   | 0.37137  | 0.56727  | 0.48871  | 0.54678  | 0.58026  | 0.13294  | 0.04609  | -0.34746 | -0.67397 | -0.67359 | -0.89084 | -0.85966 | -0.63406 | 0.05496  | 0.04349  | 0.05834  | 0.20967  | 0.13836  | -0.80631 | -0.19001 | 0.00836  | 0.1552   | 0.04087  | 0.14504  |
| PF11 0284   | -0.02228 | 0.41349  | 0.87948  | 0.76418  | 0.73262  | 0.83286  | 0.92773  | 0.87678  | 0.77915  | 0.87179  | 0.81368  | 0.77735  | 0.38392  | 0.05404  | -0.07399 | -0.23297 | -0.45356 | -0.84939 | -0.90329 | -1.17232 | -1.20882 | -0.87341 | -0.43361 | -0.20251 |
| PF14 0244   | 0.74053  | 1.01204  | 0.54578  | 1.00591  | 1.02873  | 0.88425  | 1.02228  | 1.11471  | 0.7764   | 0.36249  | 0.44359  | 0.29846  | 0.16296  | -0.05117 | 0.04574  | -0.02892 | -0.12079 | 0.07146  | 0.15672  | 0.119    | 0.3077   | 0.3864   | 0.43201  | 0.58601  |
| PF14 0518   | 1.16202  | 1.23182  | 0.683    | 0.75295  | 0.78441  | 0.71905  | 0.55397  | 0.61428  | 0.20223  | -0.01107 | 0.02585  | -0.13661 | -0.49103 | -0.79174 | -0.78443 | -0.70336 | -0.77919 | -0.46839 | 0.28624  | 0.23675  | 0.41922  | 0.62069  | 0.82855  | 0.93835  |
| PF11 0412   | -0.79149 | -0.62981 | -0.38389 | -0.29266 | -0.04507 | 0.18573  | 0.25538  | 0.34608  | 0.13545  | 0.23415  | 0.4464   | 0.29561  | 0.23999  | 0.02856  | 0.39167  | 0.33796  | 0.24004  | -0.10536 | 0.29002  | -0.19899 | -0.27991 | -0.75631 | -0.63747 | -0.44536 |
| PF10 0241   | -0.26741 | -0.24876 | 0.04672  | -0.07753 | -0.25667 | -0.45631 | -0.5756  | -0.48837 | -0.02308 | 0.14071  | 0.4078   | 0.66503  | 0.68192  | 0.75276  | 0.70269  | 0.65772  | 0.46815  | 0.2803   | 0.24536  | -0.19935 | -0.27585 | -0.48088 | -0.47638 | -0.31486 |
| PF11 0352   | -0.55845 | -0.53436 | -0.55583 | -0.71904 | -0.64581 | -0.79099 | -0.7358  | -0.62825 | -0.51675 | -0.53169 | -0.08566 | 0.13336  | 0.41069  | 0.51389  | 0.74606  | 0.7372   | 0.58985  | 0.37908  | 0.35869  | 0.16623  | -0.05779 | -0.45102 | -0.78952 | -0.92737 |
| PF13 0237   | -1.27245 | -1.38986 | -0.93027 | -1.21555 | -1.03349 | -0.94686 | -0.64922 | -0.2744  | 0.05184  | 0.20952  | 0.36769  | 0.41555  | 0.55612  | 0.69336  | 0.57468  | 0.54407  | 0.36005  | 0.31743  | -0.38983 | -0.17386 | -0.37075 | -0.58095 | -0.76089 | -0.90517 |

*P. vivax* (smru1)

| geneid     | TP01    | TP02    | TP03    | TP04    | TP05    | TP06    | TP07    | TP08    | TP09    |
|------------|---------|---------|---------|---------|---------|---------|---------|---------|---------|
| PVX_082695 | -1.7079 | -1.6636 | -2.177  | -1.9844 | -2.1499 | -0.3669 | 1.0157  | 0.9386  | 0.1879  |
| PVX_083010 | -0.4629 | 0.1496  | 0.3118  | 0.2633  | 0.2081  | -0.0773 | 0.2839  | -0.0264 | -0.2621 |
| PVX_113815 | 0.0511  | -0.1685 | -0.0341 | 0.0981  | -0.1623 | 0.3261  | 0.6583  | 0.7419  | 0.5813  |
| PVX_084125 | -0.5732 | -0.8814 | -0.0881 | 0.3962  | 0.2262  | -0.4853 | -0.6427 | 0.0891  | 0.1498  |
| PVX_001805 | 0.1138  | 0.3818  | 0.3066  | 0.3482  | 0.4249  | 0.3553  | 0.1037  | 0.0295  | 0.0929  |
| PVX_099040 | -0.0775 | -0.3554 | -0.4344 | -0.2306 | 0.5484  | 0.7064  | 0.3599  | 0.3088  | 0.2153  |
| PVX_000885 | 0.0379  | 0.2027  | 0.0272  | 0.0121  | 0.1358  | 0.3459  | 0.0571  | -0.0502 | -0.1207 |
| PVX_100540 | 0.1756  | 0.6002  | 0.6137  | 0.6413  | 0.2578  | -0.0985 | -0.4353 | -0.3286 | -0.3508 |
| PVX_093530 | 0.0559  | 0.5386  | 0.5569  | 0.5187  | 0.235   | -0.4152 | -0.6548 | -0.7848 | -0.5658 |
| PVX_000815 | 0.6057  | 0.4466  | -0.1296 | -0.2645 | -0.3437 | -0.1847 | -0.0867 | 0.0609  | 0.1482  |
| PVX_100905 | -1.2085 | -0.6593 | 0.2977  | 0.7995  | 0.7783  | 0.3266  | -0.5072 | -0.8086 | -0.8042 |
| PVX_084090 | 1.7583  | 1.5925  | -0.0014 | -0.3754 | -0.5189 | -0.6078 | -0.2042 | -0.1579 | 0.6003  |
| PVX_088240 | 0.3049  | 0.2219  | 0.0439  | -0.3053 | -0.0522 | -0.3802 | -0.1724 | 0.3374  | 0.7644  |
| PVX_084880 | 0.5725  | 0.1484  | -0.0713 | 0.2055  | 0.2248  | 0.172   | 0.1429  | 0.2083  | 0.3443  |
| PVX_079770 | 0.0517  | -0.1559 | -0.5052 | -0.5721 | -0.4094 | 0.2217  | 0.2193  | -0.1695 | -0.4235 |
| PVX_081745 | 0.3085  | 0.3071  | 0.3676  | 0.5172  | 0.5569  | 0.6886  | 0.0977  | -0.2779 | -0.3266 |
| PVX_100720 | -0.2992 | -0.2491 | -0.0632 | 0.0033  | 0.1501  | -0.6399 | -0.9025 | -0.8502 | -0.518  |
| PVX_115185 | -0.1194 | 0.9108  | 1.013   | 0.9768  | 0.521   | -0.1411 | -0.4427 | -0.3643 | -0.3453 |
| PVX_000745 | 0.8718  | 0.6288  | 0.1879  | 0.2119  | 0.422   | 0.2151  | -0.0119 | -0.7045 | -0.7513 |
| PVX_114530 | -0.1042 | 0.555   | 0.6468  | 0.6057  | 0.3698  | -0.1549 | -0.7671 | -0.7799 | -0.6695 |
| PVX_114740 | -0.4506 | 0.0439  | 0.0207  | 0.1193  | 0.3343  | 0.3207  | 0.0174  | -0.0325 | -0.0029 |
| PVX_121985 | 0.0043  | 0.3669  | 0.569   | 0.4685  | 0.196   | 0.1708  | -0.1469 | -0.2141 | -0.2512 |
| PVX_093680 | 0.1699  | 0.2156  | 0.1382  | 0       | -1.1139 | -2.6363 | -2.6584 | -0.4697 | 0.0315  |
| PVX_080295 | -0.4246 | -0.4131 | -0.1826 | 0.1859  | 0.2821  | 0.3995  | 0.0918  | -0.3453 | -0.3097 |
| PVX_021685 | 0.2962  | 0.2147  | -0.1997 | -0.2116 | -0.2379 | 0.0456  | 1.1424  | 1.3903  | 0.994   |
| PVX_099825 | -0.8123 | -0.2892 | 0.0681  | 0.3694  | 0.6444  | 0.1886  | -0.4742 | -0.5905 | -0.4223 |
| PVX_092460 | 0.1792  | -0.0543 | -0.3313 | -0.1732 | -0.0976 | -0.1958 | 0.3038  | 0.9279  | 0.8527  |
| PVX_116930 | -0.199  | -0.1443 | 0.1317  | 0.0672  | 0.3443  | 0.1971  | 0.0064  | -0.0088 | -0.0338 |
| PVX_091875 | -0.2041 | -0.5559 | -0.2966 | 0.0181  | 0.2867  | 0.5899  | -0.2849 | -0.3686 | -0.1817 |
| PVX_097895 | -0.2072 | 0.0111  | 0.1479  | 0.028   | 0.3785  | 0.4785  | 0.587   | 0.4683  | -0.0389 |
| PVX_089630 | -1.4695 | -1.6918 | -1.7332 | -1.3984 | -0.7585 | 1.6566  | 0.8606  | -0.1555 | -0.7032 |
| PVX_107735 | -0.5123 | -0.6579 | -0.936  | -1.2502 | -1.4719 | -1.5188 | -1.5195 | -1.7042 | -1.3842 |
| PVX_085360 | 0.9332  | 0.8658  | 0.8983  | 0.689   | 0.4713  | -0.2949 | -0.5369 | -0.4608 | -0.4083 |
| PVX_096920 | 0.4188  | 0.3136  | 0.1235  | 0.0378  | 0.1194  | 0.0605  | 0.1818  | 0.0825  | 0.1536  |
| PVX_092335 | -0.4802 | -0.3793 | 0.3533  | 0.5187  | 0.4104  | 0.645   | 0.4025  | 0.0593  | -0.0755 |
| PVX_087115 | -0.6289 | -0.5122 | -0.3315 | 0.1307  | 0.1554  | 0.4016  | 0.1033  | -0.3381 | -0.2241 |
| PVX_122345 | 0.3581  | 0.3676  | 0.0895  | -0.1957 | -0.8498 | -0.9095 | -1.0867 | 0.1418  | 0.5132  |
| PVX_097990 | -0.1539 | -0.0768 | -0.0409 | -0.1    | -0.296  | -0.287  | -0.0388 | -0.227  | -0.7595 |
| PVX_085435 | 0.3384  | 0.3603  | 0.267   | 0.1079  | 0.1814  | 0.8125  | 0.958   | 0.7573  | 0.8006  |
| PVX_118135 | 0.0962  | 0.0757  | 0.013   | -0.138  | 0.0289  | 0.1603  | 0.2415  | -0.0738 | -0.4083 |
| PVX_022685 | -0.0786 | -0.2804 | -0.0226 | 0.0447  | -0.1423 | -0.5908 | -0.914  | -0.6584 | -0.3761 |
| PVX_083305 | -0.0601 | 0.0701  | -0.0787 | -0.089  | -0.1843 | -0.1171 | 0.0048  | 0.1176  | 0.0697  |
| PVX_099380 | 0.4262  | 0.2724  | 0.3384  | 0.3611  | -0.0115 | -0.0691 | 0.1948  | -0.0123 | -0.1148 |
| PVX_081340 | -1.3083 | -0.3639 | 0.0939  | 0.2478  | 0.4871  | 0.3281  | -0.0915 | -1.0149 | -1.0798 |
| PVX_113295 | -0.1437 | 0.0557  | -0.0153 | 0.1667  | 0.4334  | 0.0494  | 0.173   | -0.2583 | -0.4112 |
| PVX_085605 | -1.2844 | -0.42   | -0.084  | -0.069  | 0.1436  | 0.4648  | -0.3258 | -0.875  | -1.0366 |
| PVX_000580 | -1.0868 | -0.1864 | 0.5972  | 0.862   | 0.7418  | -0.1825 | -0.7081 | -1.1299 | -0.937  |
| PVX_091590 | -0.2009 | -0.256  | -0.2585 | 0.2161  | 0.9959  | 0.4471  | -0.0163 | -0.0501 | -0.1086 |
| PVX_086130 | -0.4524 | 0.4542  | 0.7199  | 0.7117  | 0.632   | -0.4881 | -0.9166 | -0.975  | -0.6839 |
| PVX_123835 | -0.2392 | -0.676  | -0.8106 | -0.7364 | -0.6771 | 0.561   | 1.215   | 0.1922  | 0.069   |
| PVX_091700 | -0.9299 | -0.9357 | -1.0068 | -0.8898 | -0.5762 | 0.0776  | 0.4825  | 0.4166  | 0.0918  |
| PVX_089610 | -0.0061 | -0.0272 | -0.0653 | -0.0653 | 0.1773  | 0.0921  | 0.1806  | 0.3094  | 0.1041  |
| PVX_094740 | 0.4868  | -0.1917 | -0.4151 | -0.996  | -1.4873 | -0.8621 | 0.1747  | 0.6384  | 1.2432  |
| PVX_119230 | -0.1264 | 0.1417  | 0.1212  | 0.0944  | -0.4946 | -0.6488 | -0.917  | -0.0329 | 0.4531  |
| PVX_115270 | -0.2295 | -0.1097 | 0.2102  | 0.3342  | 0.6645  | 0.2056  | -0.0326 | -0.1547 | -0.3619 |
| PVX_112665 | 2.0169  | -0.0369 | -0.4722 | -0.8059 | -1.6165 | -2.272  | -2.1204 | -0.5557 | 0.2936  |
| PVX_091605 | -0.6109 | 0.1589  | 0.5095  | 0.6346  | 0.6953  | 0.2049  | -0.284  | -0.2981 | -0.4562 |
| PVX_099510 | 0.3901  | 0.0141  | -0.137  | -0.1504 | -0.2089 | -0.1737 | 0.0753  | -0.3422 | -0.4775 |
| PVX_080015 | 0.8682  | 1.1099  | 1.165   | 1.0748  | 0.4598  | -1.4739 | -1.4816 | -1.5243 | -1.5044 |
| PVX_082730 | -0.462  | 0.1546  | 0.265   | 0.4058  | 0.5431  | 0.5838  | 0.1854  | -0.2918 | -0.2999 |
| PVX_099725 | 1.0237  | 0.4698  | 0.3908  | 0.4223  | 0.3685  | 0.5329  | 0.3772  | 0.1528  | 0.1381  |

|            |         |         |         |         |         |         |         |         |         |
|------------|---------|---------|---------|---------|---------|---------|---------|---------|---------|
| PVX_090295 | 0.0448  | 0.0905  | -0.096  | -0.516  | -0.0659 | -0.1935 | 0.0133  | 0.6759  | 0.6679  |
| PVX_089330 | -0.0872 | -0.4519 | -0.1619 | 0.0543  | -0.0667 | 0.199   | 0.9289  | 0.2929  | -0.0292 |
| PVX_038690 | -0.2442 | -0.3124 | -0.3037 | -0.3767 | -0.3992 | -0.0089 | 0.2669  | 0.0866  | -0.4736 |
| PVX_113445 | 0.0528  | -0.4367 | -0.3909 | -0.2341 | 0.0455  | 0.6873  | 0.6914  | 0.5644  | 0.4125  |
| PVX_091585 | 0.3319  | 0.2826  | 0.3858  | 0.3532  | 0.1055  | 0.2934  | -0.3237 | -0.2719 | -0.509  |
| PVX_092050 | 0.444   | -0.2562 | -0.6207 | -0.5526 | 0.2121  | 0.5333  | 0.556   | 0.6222  | 0.7139  |
| PVX_118125 | -0.4916 | 0.0331  | 0.3417  | 0.4418  | 0.4823  | 0.11    | -0.2254 | -0.1583 | -0.0312 |
| PVX_123910 | 0.429   | 0.1115  | 0.204   | 0.1594  | 0.2591  | 0.3012  | 0.1823  | -0.1655 | -0.3859 |
| PVX_100510 | 0.0907  | -0.3207 | -0.3572 | -0.8764 | -1.2312 | -0.8132 | 0.1298  | 1.0401  | 1.1157  |
| PVX_001105 | 0.9677  | 0.6298  | 0.4475  | -0.0817 | -0.1218 | -0.1169 | -0.3441 | 0.1525  | 0.3064  |
| PVX_089160 | 0.3824  | 0.8083  | 0.6035  | 0.7988  | 0.5931  | 0.3941  | 0.1473  | 0.1345  | -0.1615 |
| PVX_090115 | 0.3186  | -0.1488 | 0.0048  | 0.3758  | 0.3405  | 0.2697  | 0.2327  | 0.4762  | 0.5666  |
| PVX_091620 | -0.4696 | -0.308  | -0.1353 | -0.0968 | 0.3368  | 0.4729  | 0.359   | 0.3965  | 0.088   |
| PVX_003815 | -0.3643 | -0.3542 | -0.5901 | -0.7882 | -0.6879 | 0.3724  | 1.326   | 0.8086  | 0.7207  |
| PVX_090250 | 1.1793  | 0.5162  | 0.3127  | 0.2126  | 0.2171  | -0.5776 | -1.3849 | -0.9089 | -0.377  |
| PVX_113345 | 0.1008  | 0.063   | 0.0182  | 0.0042  | 0.0678  | 0.023   | 0.0956  | -0.1776 | 0.1023  |
| PVX_085980 | -0.6094 | -0.5612 | -0.8357 | -0.5036 | -0.6393 | 0.1006  | 0.3403  | 0.491   | -0.1064 |
| PVX_122950 | -0.2718 | -0.1794 | -0.1035 | 0.075   | 0.1013  | 0.0611  | 0.0293  | -0.1116 | -0.2658 |
| PVX_096370 | -0.1024 | 0.1756  | 0.5885  | 0.6837  | 0.6008  | 0.2983  | -0.3599 | -0.4177 | -0.5145 |
| PVX_089380 | -0.5276 | -0.8664 | -0.4652 | 0.3026  | 0.8178  | 1.0933  | 0.2446  | -0.0241 | -0.1656 |
| PVX_082360 | -0.0167 | -0.2369 | -0.3445 | -0.2085 | -0.1121 | 0.1332  | 0.3909  | 0.1075  | -0.0913 |
| PVX_100575 | -0.3122 | 0.1932  | 0.3707  | 0.4686  | 0.5986  | 0.5087  | 0.202   | -0.0728 | 0.0629  |
| PVX_117385 | -0.9643 | -1.0537 | -1.436  | -1.7868 | -1.5419 | -0.5714 | 0.77    | 1.0475  | 0.7482  |
| PVX_100855 | 0.5711  | 0.7644  | 0.6028  | 0.3885  | -0.2231 | -1.2862 | -0.6777 | -0.1588 | 0.3929  |
| PVX_089860 | -0.7969 | -1.0663 | -1.2666 | -0.9944 | -0.3087 | 0.6527  | 0.5331  | 0.1505  | 0.1802  |
| PVX_099185 | -0.1448 | 0.2248  | 0.1837  | 0.1929  | 0.3835  | 0.1699  | -0.2561 | -0.6956 | -0.7514 |
| PVX_086905 | 0.5385  | 0.4605  | 0.0485  | -0.0596 | -0.2342 | -0.1865 | -0.0857 | -0.5597 | -0.5617 |
| PVX_099050 | 0.8643  | 0.7921  | 0.4763  | 0.0997  | -0.2994 | -0.5384 | -0.3924 | 0.4736  | 1.3364  |
| PVX_091015 | -0.0762 | 0.2384  | 0.454   | 0.6313  | 0.5351  | 0.3631  | 0.0594  | -0.27   | -0.391  |
| PVX_087060 | 0.2216  | -0.2222 | -0.2905 | 0.0018  | -0.038  | 0.1103  | 0.4957  | 0.8479  | 0.6054  |
| PVX_099800 | 0.4919  | 0.2889  | 0.2147  | 0.1777  | 0.4899  | 0.7696  | 0.9181  | 0.7961  | 0.7566  |
| PVX_122630 | -0.7214 | 0.0602  | 0.1382  | 0.0717  | 0.122   | 0.2674  | -0.0116 | -0.5128 | -0.4062 |
| PVX_079855 | 0.7281  | 0.5346  | 0.2833  | 0.1874  | 0.1374  | 0.0091  | -0.017  | -0.494  | -0.0778 |
| PVX_089605 | 0.6239  | 0.4748  | 0.3965  | 0.2429  | 0.282   | -0.0198 | -0.2509 | -0.2861 | -0.3445 |
| PVX_081795 | -0.7594 | 0.0238  | 0.8865  | 1.086   | 0.5659  | -0.1493 | -0.3703 | -0.5525 | -0.3796 |
| PVX_083425 | -1.0253 | -0.2681 | 0.0588  | 0.3289  | 0.3222  | -0.6013 | 0.4515  | 0.6561  | -0.1234 |
| PVX_099150 | 0.2083  | -0.2833 | -0.2459 | 0.0694  | 0.3833  | 0.7374  | 0.6029  | 0.1869  | 0.4782  |
| PVX_089965 | 0.5677  | 0.3809  | 0.345   | 0.3449  | 0.3903  | 0.571   | 0.3013  | 0.3887  | 0.513   |
| PVX_084845 | -0.6625 | -0.1762 | 0.7925  | 0.9801  | 0.5283  | -0.2304 | -0.3773 | -0.2096 | -0.0622 |
| PVX_085230 | 0.3585  | 0.4552  | 0.3542  | 0.3857  | 0.3269  | 0.1036  | -0.1934 | -0.6419 | -0.9752 |
| PVX_121945 | -0.2423 | -0.7605 | -1.2298 | -1.5987 | -2.3438 | -2.3116 | 0.5711  | 1.3515  | 1.0583  |
| PVX_098865 | -0.6038 | -0.4937 | -0.5107 | -0.6054 | -0.3521 | -0.6571 | 0.9372  | 1.2916  | 0.6919  |
| PVX_099910 | -0.5327 | -0.205  | 0.3207  | 0.6786  | 0.575   | 0.6097  | 0.0732  | -0.3285 | -0.1543 |
| PVX_080095 | 0.7682  | 0.3501  | 0.3087  | 0.3063  | 0.2385  | 0.2469  | 0.1105  | 0.6575  | 0.9115  |
| PVX_113365 | -0.7414 | -0.2641 | 0.0637  | 0.0801  | 0.1133  | 0.1387  | 0.195   | 0.1662  | -0.0811 |
| PVX_117810 | 0.0235  | 0.2968  | 0.6243  | 0.5793  | 0.7656  | 0.736   | -0.0259 | -0.3427 | -0.3923 |
| PVX_081270 | 0.345   | 0.3213  | 0.3483  | 0.2683  | -0.0956 | 0.2188  | 0.4954  | 0.1835  | 0.0644  |
| PVX_084215 | -0.644  | -0.6576 | -0.6116 | -0.6258 | -0.8879 | -0.4622 | 0.7514  | 0.6907  | 0.0832  |
| PVX_059690 | 0.7378  | 0.427   | 0.3551  | 0.4214  | 0.0296  | -0.0524 | 0.2474  | 0.7626  | 1.1119  |
| PVX_122110 | -1.3312 | -0.7459 | 0.0608  | 0.9735  | 1.3178  | 0.0294  | -1.1102 | -1.5013 | -1.4546 |
| PVX_084475 | -0.4983 | -0.9316 | -0.6881 | -0.2434 | -0.0095 | 0.3122  | 0.7768  | 0.1975  | -0.0421 |
| PVX_116700 | -0.1231 | 0.5752  | 0.5242  | 0.1669  | 0.2506  | -0.0386 | -0.8766 | -1.2809 | -1.1846 |
| PVX_084190 | 0.4168  | 0.0937  | -0.1979 | -0.2393 | 0.3381  | 0.6186  | 0.0379  | -0.3461 | -0.1738 |
| PVX_090120 | 0.25    | -0.133  | -0.0172 | 0.2354  | 0.3673  | 0.3639  | 0.3456  | 0.4282  | 0.6556  |
| PVX_117285 | -0.3725 | 0.1986  | 0.1906  | 0.2283  | 0.2115  | -0.214  | -0.7176 | -0.6812 | -0.6232 |
| PVX_089000 | 0.6137  | 0.4062  | 0.0608  | -0.6924 | -0.6464 | -0.8308 | -0.2897 | 0.3748  | 0.9274  |
| PVX_112715 | -0.315  | -0.7125 | -0.7754 | -0.7872 | -0.7542 | 0.4631  | 0.6455  | 0.2774  | -0.182  |
| PVX_085830 | 0.3731  | 0.3594  | 0.1989  | 0.3777  | -0.0961 | -0.8516 | -0.4927 | -0.1455 | 0.2484  |
| PVX_119825 | 0.5415  | 0.3887  | 0.1462  | -0.0459 | -0.2127 | 0.0543  | 0.5777  | 0.4371  | 0.3561  |
| PVX_119510 | -1.4343 | -0.9201 | -0.5741 | -0.5523 | -0.4989 | -1.087  | 0.0499  | 0.915   | 0.6286  |
| PVX_122835 | -0.1261 | 0.0048  | -0.1705 | -0.3902 | -0.5619 | 0.2156  | 0.5931  | 0.2242  | 0.4601  |
| PVX_099735 | -0.1082 | -0.177  | -0.3742 | -0.4909 | -0.3418 | -0.4599 | -0.6456 | 0.4682  | 0.6936  |
| PVX_001910 | 0.0444  | -0.0261 | 0.4907  | 0.5797  | 0.5317  | 0.4705  | 0.2426  | 0.2031  | -0.3621 |

|            |         |         |         |         |         |         |         |         |         |
|------------|---------|---------|---------|---------|---------|---------|---------|---------|---------|
| PVX_090860 | 0.9791  | 0.5623  | 0.2396  | -0.3879 | -0.8171 | -0.7031 | -0.1935 | 0.6464  | 1.4529  |
| PVX_089720 | -0.0607 | 0.0856  | 0.3797  | 0.1997  | 0.1579  | 0.0952  | -0.4333 | -0.2013 | 0.0437  |
| PVX_115145 | 0.6655  | 0.4188  | 0.2062  | 0.1896  | 0.039   | -0.2655 | 0.2244  | 0.8318  | 1.2101  |
| PVX_090990 | -0.7977 | -0.5724 | -0.2099 | -0.087  | -0.1632 | -0.6557 | -0.9865 | -1.019  | -0.9482 |
| PVX_003685 | -0.2141 | -0.6103 | -0.5937 | -0.2512 | 0.0604  | 0.0759  | 0.397   | 0.0554  | -0.2104 |
| PVX_123615 | 0.1979  | -0.2506 | -0.4101 | -0.5494 | -0.5893 | 0.3798  | 0.3075  | 0.1678  | 0.4439  |
| PVX_000010 | 0.2345  | 0.2459  | 0.3267  | 0.1362  | -0.1373 | -0.4772 | -0.2981 | -0.6883 | -0.4576 |
| PVX_017140 | 0.7194  | 0.784   | 0.6614  | 0.5901  | 0.0598  | -0.5543 | -0.6923 | -0.6186 | -0.3853 |
| PVX_096005 | 1.3835  | 1.1902  | 0.9579  | -0.0624 | -1.6542 | -1.5953 | -1.6196 | -0.8139 | -0.1599 |
| PVX_094995 | -0.3003 | -0.3278 | -0.1195 | 0.4759  | 0.4349  | 0.18    | -0.0293 | -0.119  | -0.3148 |
| PVX_092940 | -1.1146 | -1.3462 | -1.4828 | -1.1575 | -0.971  | 0.5869  | 0.7381  | -0.344  | -0.6492 |
| PVX_123740 | -0.9466 | -0.9766 | -0.2292 | 0.3891  | 0.8896  | 0.6404  | 0.1312  | 0.2141  | -0.3841 |
| PVX_101520 | 1.4856  | 0.8306  | 0.5829  | 0.526   | -0.2186 | -1.2874 | -2.1629 | -2.0007 | -1.216  |
| PVX_080440 | 0.3438  | 0.3716  | 0.3175  | 0.3269  | 0.3054  | -0.0389 | -0.8326 | -1.3568 | -1.4054 |
| PVX_100000 | -0.1296 | 0.535   | 0.5453  | 0.2998  | 0.4298  | 0.0413  | 0.0258  | -0.2088 | -0.1198 |
| PVX_101120 | 0.6056  | 0.3771  | 0.1216  | 0.0471  | -0.3713 | -0.1796 | -0.1997 | 0       | 0.5578  |
| PVX_082550 | 0.0408  | 0.1844  | 0.7265  | 0.7735  | 0.4364  | 0.3451  | -0.0908 | -0.374  | -0.5618 |
| PVX_091285 | 0.2547  | -0.2009 | -0.2773 | -0.0023 | 0.4093  | 0.6244  | 0.3746  | 0.403   | 0.5239  |
| PVX_099035 | -0.0542 | 0.1074  | 0.1721  | 0.0219  | -0.0894 | 0.2166  | 0.1982  | 0.0525  | -0.2266 |
| PVX_092210 | 0.5231  | -0.2173 | 0.2049  | 0.5141  | 0.8728  | 0.4429  | 0.2017  | 0.0512  | 0.1566  |
| PVX_091155 | -0.8793 | -0.9444 | -1.2301 | -0.8517 | -0.2282 | 1.066   | 1.3688  | 0.2791  | -0.1606 |
| PVX_094585 | 0.4548  | 0.1279  | -0.1891 | -0.2569 | 0.2644  | -0.0119 | 0.3951  | 0.7255  | 0.8382  |
| PVX_122850 | -0.0543 | -0.0378 | -0.0141 | 0.0751  | 0.2242  | 0.3036  | 0.0303  | 0.1764  | 0.4001  |
| PVX_093510 | -0.9543 | 0.3234  | 0.8263  | 1.0134  | 0.6653  | 0.1129  | -0.8735 | -1.0337 | -1.0737 |
| PVX_117650 | -0.4261 | -0.1318 | 0.101   | 0.5536  | 0.5837  | 0.5397  | 0.0332  | -0.1666 | -0.2845 |
| PVX_100970 | 0.8778  | 0.3658  | -0.1257 | -0.5531 | -0.3782 | -0.3873 | 0.2802  | 0.5031  | 0.6729  |
| PVX_114100 | -0.289  | 0.2883  | 0.573   | 0.7244  | 0.892   | 0.5786  | -0.1275 | -0.6669 | -0.9362 |
| PVX_000940 | 0.434   | 0.8349  | 0.5532  | 0.4264  | 0.1048  | -0.201  | -0.3039 | 0.1774  | 0.3206  |
| PVX_123460 | 0.232   | 0.3735  | 0.4346  | 0.3216  | 0.3869  | 0.1011  | 0.0458  | 0.3399  | 0.493   |
| PVX_098645 | 0.4763  | 0.4699  | 0.5244  | 0.4501  | 0.4293  | 0.6364  | 0.0567  | -0.4557 | -0.2327 |
| PVX_084620 | 0.1848  | 0.0976  | 0.054   | 0.2073  | 0.2026  | 0.5859  | 0.8124  | 0.4346  | 0.383   |
| PVX_094620 | -0.3715 | -0.2478 | -0.0415 | -0.2372 | 0.0771  | 0.7808  | 0.768   | 0.7274  | 0.4652  |
| PVX_000715 | -0.4855 | 0.333   | 0.5083  | 0.3801  | 0.1919  | 0.0779  | -0.0234 | -0.0331 | -0.1827 |
| PVX_080260 | -0.3531 | -0.2049 | -0.201  | -0.2046 | 0.0328  | 0.0935  | 0.2063  | 0.4601  | 0.2795  |
| PVX_001085 | 0.3752  | 0.3928  | -0.1764 | -0.1402 | -0.0405 | -0.1911 | -0.171  | 0.1854  | 0.7898  |
| PVX_114385 | 0.5846  | 0.2566  | 0.0139  | -0.0986 | -0.2611 | -0.4438 | -0.4227 | 0.099   | 0.5629  |
| PVX_112120 | 0.0261  | 0.1781  | 0.3454  | -0.0306 | -0.2756 | -0.3073 | -0.2113 | -0.2268 | -0.0078 |
| PVX_085665 | -0.2112 | -0.7812 | -0.9197 | -0.3678 | -0.0895 | -0.6316 | 0.5621  | 0.8376  | 0.6272  |
| PVX_085885 | -0.2104 | 0.1908  | 0.3215  | 0.1736  | 0.3643  | 0.3505  | 0.3174  | -0.202  | -0.4637 |
| PVX_079755 | -0.2601 | 0.1426  | 0.1809  | 0.4669  | 0.2959  | 0.8444  | 0.2336  | 0.0447  | 0.1014  |
| PVX_117740 | 0.4559  | 0.1278  | -0.2684 | -0.9719 | -1.3258 | -1.3299 | -0.6991 | 0.2549  | 1.2423  |
| PVX_085780 | -0.6042 | 0.0104  | 0.6639  | 0.8783  | 0.9812  | 0.8981  | 0.2368  | -0.2577 | -0.1957 |
| PVX_086215 | -1.0062 | -1.0325 | -1.1439 | -0.7265 | -0.544  | -0.6954 | -1.131  | -1.3851 | -1.4139 |
| PVX_100595 | -0.0078 | 0.5428  | 0.3908  | 0.2992  | 0.1725  | -0.4356 | -0.258  | -0.0367 | -0.1507 |
| PVX_114105 | 0.3072  | 0.0814  | -0.0519 | 0.0613  | 0.2601  | 0.4034  | 0.2218  | 0.1021  | -0.0986 |
| PVX_099810 | 0.8026  | 0.0258  | -0.2559 | -0.175  | 0.0853  | 0.3359  | 0.8377  | 1.263   | 1.0969  |
| PVX_092620 | 0.3853  | -0.1154 | -0.3229 | -0.4612 | -0.3102 | -0.1235 | 0.2918  | 0.6379  | 0.9096  |
| PVX_094285 | 0.5114  | 0.5651  | 0.4997  | 0.3365  | 0.0961  | -0.4466 | -0.6692 | -0.7383 | -0.2114 |
| PVX_119385 | -0.1726 | -0.233  | -0.2303 | -0.4181 | -0.5426 | -0.2077 | 0.7333  | 0.6618  | 0.1123  |
| PVX_018655 | -1.3543 | -1.1429 | -1.1588 | -1.2089 | -1.1432 | -1.2539 | -1.0534 | -0.9921 | -0.9978 |
| PVX_085770 | -0.4931 | -0.6027 | -0.2777 | 0.0063  | 0.0629  | -0.2864 | -0.215  | -0.4139 | -0.5735 |
| PVX_082945 | 0.3337  | 0.4727  | 0.3173  | 0.2862  | 0.331   | 0.2174  | 0.022   | 0.0539  | -0.1893 |
| PVX_097660 | -0.1859 | -0.2823 | -0.0723 | 0.4419  | 0.9966  | 0.3208  | 0.107   | 0.0305  | 0.0961  |
| PVX_096150 | 0.3923  | 0.2446  | 0.2041  | 0.3189  | -0.1085 | -0.1183 | -0.5041 | -0.6232 | -0.5182 |
| PVX_001750 | -0.4209 | 0.0917  | 0.346   | 0.4693  | 0.7272  | 0.3416  | -0.332  | -0.6513 | -0.7155 |
| PVX_113560 | -0.196  | -0.4376 | 0.232   | 0.4973  | 0.815   | 0.3689  | -0.012  | -0.1647 | -0.19   |
| PVX_091045 | 0.0489  | -0.0506 | -0.7032 | -0.4801 | -0.2244 | 0.3397  | 0.5854  | 0.4199  | 0.3957  |
| PVX_000540 | 0.5557  | 0.4044  | 0.3032  | 0.1482  | 0.2405  | 0.2429  | 0.1198  | 0.3815  | 0.5681  |
| PVX_101295 | 0.0315  | 0.2392  | 0.1855  | 0.0578  | 0.2184  | 0.3759  | 0.1768  | 0.5262  | 0.5498  |
| PVX_089400 | -0.0597 | 0.2711  | 0.8634  | 0.9109  | 0.7789  | 0.1517  | -0.0872 | -0.1919 | -0.1481 |
| PVX_029690 | -0.2992 | -0.1205 | -0.0901 | 0.1475  | 0.0966  | 0.0533  | -0.0677 | -0.2777 | -0.632  |
| PVX_069190 | -0.0238 | 0.2853  | 0.5289  | 0.5098  | 0.6404  | 0.4618  | 0.0556  | -0.1262 | -0.7728 |
| PVX_081550 | -1.8704 | -2.1405 | -2.4623 | -2.6557 | -2.6708 | -1.6716 | 1.0101  | 1.7312  | 0.7442  |

|            |         |         |         |         |         |         |         |         |         |
|------------|---------|---------|---------|---------|---------|---------|---------|---------|---------|
| PVX_089245 | 0.4152  | -0.0826 | -0.1793 | -0.1705 | 0.0499  | -0.1019 | -0.0042 | 0.4657  | 0.7334  |
| PVX_005040 | 0.6503  | 1.0088  | 1.3386  | 1.3744  | 0.8814  | -0.1862 | -1.0062 | -1.3794 | -1.1674 |
| PVX_083115 | -0.253  | 0.079   | 0.3075  | 0.4534  | 0.4481  | 0.18    | 0.3515  | 0.4953  | 0.4149  |
| PVX_123155 | 0.5691  | 0.2566  | 0.5241  | 0.1626  | 0.2331  | 0.3347  | 0.4023  | 0.324   | 0.7696  |
| PVX_081565 | 0.1838  | 0.4009  | 0.4308  | 0.5562  | 0.5234  | -0.0842 | -0.4947 | -0.8087 | -0.7744 |
| PVX_081310 | 1.2147  | 1.1443  | 0.8762  | 0.5192  | 0.4116  | -0.2701 | -0.3671 | -0.0997 | 0.1874  |
| PVX_085115 | -0.4381 | -0.4994 | -0.3074 | -0.152  | 0.1771  | 0.6031  | 0.9653  | 0.8432  | 0.1497  |
| PVX_081620 | -0.1161 | -0.3936 | -0.1873 | -0.0945 | 0.1107  | 0.4049  | 0.3689  | 0.0039  | -0.0039 |
| PVX_097645 | -1.2927 | -0.0415 | 0.5884  | 0.6198  | 0.5748  | 0.6659  | -0.5198 | -1.013  | -1.2373 |
| PVX_044690 | 0.37    | 0.724   | 0.8857  | 0.9336  | 0.6894  | 0.5686  | 0.1396  | -0.0826 | -0.2835 |
| PVX_085725 | -0.6623 | -0.8066 | -1.0637 | -1.0672 | -0.2652 | 0.4616  | 0.8074  | 0.2231  | -0.018  |
| PVX_113520 | 0.0953  | -0.4812 | -1.2361 | -1.6619 | -0.5364 | -0.1376 | 1.0112  | 0.9981  | 0.7116  |
| PVX_092825 | 0.9169  | 0.356   | 0.1293  | 0.1614  | -0.0489 | -0.1607 | -0.0931 | 0.0179  | 0.3996  |
| PVX_117750 | -1.3016 | -0.6892 | 0.3018  | 0.7826  | 0.5991  | 0.083   | -0.2773 | -0.4394 | -0.5731 |
| PVX_080600 | -0.1356 | -0.163  | 0.1287  | 0.344   | 0.1027  | -0.1742 | -0.3857 | -0.383  | -0.195  |
| PVX_086150 | 0.0116  | 0.0784  | 0.0308  | -0.2433 | -0.2555 | 0.306   | 0.2106  | -0.0053 | -0.0752 |
| PVX_114660 | -0.0227 | -0.3984 | -0.4642 | -0.2641 | -0.4094 | -0.4214 | -0.5024 | -0.6163 | -0.8332 |
| PVX_003765 | 0.5842  | 0.6313  | 0.4978  | 0.328   | 0.1204  | -0.4209 | -0.6604 | -0.5982 | -0.2326 |
| PVX_114435 | -1.0589 | -0.6262 | 0.2204  | 0.8891  | 0.7103  | 0.0542  | -0.9509 | -0.9643 | -0.852  |
| PVX_089095 | -0.3379 | -0.3558 | -0.2186 | 0.1551  | 0.3937  | 0.3629  | -0.1676 | -0.174  | -0.0199 |
| PVX_118645 | -0.072  | -0.0244 | 0.3544  | 0.3901  | 0.8194  | 0.3712  | -0.1622 | -0.1073 | -0.0772 |
| PVX_123130 | 0.0121  | 0.5502  | 0.6085  | 0.2091  | 0.4057  | 0.2322  | 0.0803  | 0.358   | 0.218   |
| PVX_123305 | 0.1611  | 0.3208  | 0.3094  | 0.1244  | -0.0248 | 0.365   | 0.1707  | -0.0281 | 0.4589  |
| PVX_092235 | 0.2984  | 0.3998  | 0.3163  | 0.25    | 0.164   | 0.3297  | 0.084   | -0.1949 | -0.1925 |
| PVX_115070 | 0.9108  | 0.5692  | 0.2518  | -0.0226 | 0.1048  | 0.194   | 0.1875  | 0.0543  | -0.0082 |
| PVX_095305 | -0.2472 | -0.4319 | -0.6032 | -0.5774 | -0.5686 | -0.4466 | 0.6888  | 1.1177  | 0.5872  |
| PVX_092035 | 0.7608  | 0.4239  | 0.1221  | 0.0798  | 0.0938  | 0.0137  | 0.649   | 0.9391  | 1.2521  |
| PVX_119595 | -0.1376 | 0.1204  | 0.2618  | 0.3592  | 0.5556  | -0.2931 | -0.3968 | -0.4725 | -0.335  |
| PVX_099570 | -0.2632 | -0.0309 | -0.016  | 0.2661  | 0.1147  | 0.2736  | 0.3224  | -0.22   | -0.3326 |
| PVX_122775 | -0.0692 | -0.2848 | -0.591  | -0.0458 | 0.7352  | 0.7604  | 0.9466  | 0.7552  | 0.4361  |
| PVX_087160 | 0.4817  | 0.0169  | 0.1647  | 0.0499  | -0.0321 | -0.2564 | -0.1747 | 0.5715  | 1.1064  |
| PVX_080115 | -0.0434 | -0.1015 | 0.1889  | 0.6196  | 0.5094  | 0.1358  | -0.1583 | -0.3517 | -0.2219 |
| PVX_080230 | -0.6915 | 0.1625  | 0.1292  | 0.06    | 0.0815  | -0.1587 | -0.9305 | -1.146  | -1.0629 |
| PVX_101065 | -0.4321 | 0.086   | -0.352  | -0.3461 | -0.0618 | 0.7711  | 0.2748  | 0.3638  | 0.5214  |
| PVX_111055 | 0.0862  | 0.4442  | 0.619   | 0.5688  | 0.2581  | 0.2688  | -0.2387 | -0.5835 | -0.6319 |
| PVX_096080 | -0.0311 | 0.4774  | 0.573   | 0.8984  | 0.5947  | -0.2255 | -0.7466 | -1.0145 | -0.8414 |
| PVX_091035 | -0.3219 | -0.1116 | -0.128  | -0.1798 | 0.037   | 0.3918  | 0.121   | -0.0838 | -0.0007 |
| PVX_091985 | -0.1805 | 0.1581  | 0.6417  | 0.9216  | 0.8377  | -0.0048 | -0.7025 | -0.6204 | -0.5474 |
| PVX_099085 | 0.1951  | 0.3225  | -0.0499 | 0.0972  | 0.0019  | 0.7721  | -0.0902 | -0.5212 | -0.6035 |
| PVX_090315 | 0.9135  | 0.7572  | 0.501   | 0.503   | 0.026   | -0.4377 | -0.3869 | -0.3892 | -0.0399 |
| PVX_083390 | 0.813   | 1.0797  | 0.9235  | 0.8377  | 0.5152  | 0.1243  | 0.1282  | 0.5021  | 0.9101  |
| PVX_095215 | 0.3841  | 0.0767  | 0.0065  | -0.0187 | -0.0314 | -0.2228 | 0.0748  | -0.0109 | 0.3644  |
| PVX_099620 | -0.3753 | 0.4371  | 0.6156  | 0.6875  | 0.5222  | 0.4073  | -0.0822 | -0.0095 | -0.2606 |
| PVX_097545 | 1.9466  | 1.2736  | 0.4106  | -0.0529 | -0.6559 | -0.5974 | -0.554  | -0.4787 | -0.044  |
| PVX_000810 | -0.0631 | -0.3566 | -0.1732 | -0.1292 | -0.0895 | -0.1581 | 0.17    | 0.5474  | 0.4926  |
| PVX_111290 | -0.3817 | 0.0735  | 0.0966  | 0.203   | 0.3688  | 0.4473  | 0.6013  | 0.4486  | 0.5792  |
| PVX_099310 | 0.2243  | 0.4014  | 0.6041  | 0.4207  | 0.3762  | 0.7071  | 0.1516  | -0.6083 | -0.682  |
| PVX_100985 | 0.0465  | -0.6074 | -0.3573 | -0.18   | 0.1398  | 0.3514  | 0.1649  | 0.0826  | 0.1486  |
| PVX_092745 | -0.4622 | -0.3263 | 0.3344  | 0.5759  | 0.7613  | 0.4751  | -0.3858 | -0.5335 | -0.3495 |
| PVX_097015 | 1.5153  | 0.3251  | 0.0077  | -0.199  | -0.5813 | -0.9595 | -0.974  | -0.7682 | -0.3541 |
| PVX_086195 | 0.5629  | 0.5585  | 0.3045  | 0.2487  | -0.0699 | -0.9992 | -1.5797 | -0.3441 | 0.2013  |
| PVX_089695 | 0.3027  | 0.0373  | -0.3215 | -0.573  | -0.8496 | -0.3628 | -0.0342 | 0.5411  | 0.8708  |
| PVX_087925 | 0.1482  | -0.0411 | -0.3002 | -0.2298 | -0.0257 | -0.079  | 0.1032  | 0.4864  | 0.3943  |
| PVX_114560 | 0.521   | 0.5041  | 0.3306  | 0.2292  | -0.0027 | 0.1983  | -0.1077 | -0.4997 | -0.521  |
| PVX_116575 | -0.3105 | 0.5805  | 0.7886  | 0.9416  | 0.6137  | -0.1323 | -0.5977 | -0.6836 | -0.3475 |
| PVX_080035 | -0.4233 | 0.3274  | 0.6562  | 0.8085  | 0.8159  | 0.5926  | -0.4423 | -0.8653 | -0.9302 |
| PVX_101605 | 0.6318  | 0.5192  | 0.3534  | 0.2504  | -0.1867 | -0.4769 | -0.2412 | 0.3469  | 0.8157  |
| PVX_111195 | 0.5571  | 0.0279  | -0.2148 | -0.1644 | 0.1308  | 0.5363  | 0.1873  | -0.5597 | -0.4203 |
| PVX_118595 | -0.1733 | 0.1368  | 0.5017  | 0.2985  | 0.3272  | 0.0661  | -0.0684 | -0.285  | -0.1972 |
| PVX_117415 | -0.4923 | -0.5895 | -0.0957 | 0.181   | 0.1607  | 0.4903  | -0.2322 | -0.5686 | -0.4568 |
| PVX_123970 | -0.3936 | 0.3726  | 0.3962  | 0.348   | 0.2896  | 0.1193  | 0.4619  | 0.0038  | -0.4222 |
| PVX_084665 | -0.1414 | 0.1289  | 0.2413  | 0.1746  | 0.2878  | 0.1804  | -0.7852 | -2.1235 | -1.9136 |
| PVX_118190 | 0.415   | 0.1363  | -0.1678 | 0.0192  | -0.5522 | 0.1563  | -0.261  | -0.4552 | -0.231  |

|            |         |         |         |         |         |         |         |         |         |
|------------|---------|---------|---------|---------|---------|---------|---------|---------|---------|
| PVX_123490 | -0.0055 | 0.721   | 0.6567  | 0.4421  | -0.1637 | -0.7724 | -0.9245 | -0.5297 | -0.2743 |
| PVX_000820 | -0.1852 | -0.4817 | -0.7002 | -0.8355 | -0.3722 | 0.2271  | 0.5922  | 0.5635  | 0.4933  |
| PVX_079735 | 0.4218  | 0.3036  | 0.3973  | 0.324   | 0.2317  | 0.1307  | -0.2032 | -0.3435 | -0.2022 |
| PVX_115330 | 0.5221  | 0.4595  | 0.3732  | 0.5054  | 0.2879  | 0.2468  | -0.139  | -0.3402 | -0.0221 |
| PVX_124720 | 0.4527  | 0.6326  | 0.4661  | 0.497   | 0.3315  | 0.1639  | 0.1816  | 0.1056  | -0.006  |
| PVX_091445 | -0.7546 | 0.2805  | 0.5267  | 0.4762  | 0.477   | -0.1113 | -0.5572 | -0.792  | -1.1033 |
| PVX_117590 | -0.5165 | -0.5071 | -0.2428 | -0.0053 | -0.16   | 0.5413  | 0.5718  | 0.2612  | 0.1513  |
| PVX_096070 | 0.5395  | 0       | 0       | 0.3327  | -0.0815 | -0.6425 | -0.7332 | -0.5395 | -0.5395 |
| PVX_095415 | -0.5141 | -0.4644 | 0.3319  | 0.5354  | 0.6943  | 0.1156  | -0.231  | -0.3844 | -0.259  |
| PVX_084740 | 0.2312  | 0.0909  | 0.1649  | 0.4922  | 0.42    | 0.8724  | 0.3039  | 0.158   | 0.3492  |
| PVX_086290 | 0.261   | 0.1772  | 0.0069  | -0.3587 | -0.537  | -0.14   | 0.4798  | 0.164   | -0.331  |
| PVX_081835 | -0.9042 | -1.0621 | -1.2689 | -1.4412 | -1.3861 | 0.6747  | 0.9383  | 0.4023  | -0.0155 |
| PVX_123230 | -1.2373 | 0.0149  | 0.6456  | 0.9633  | 0.9397  | -0.3369 | -0.7597 | -1.1168 | -1.1103 |
| PVX_100745 | 0.7349  | 0.6427  | 0.4909  | 0.3046  | 0.4707  | 0.595   | 0.2396  | 0.0256  | -0.1922 |
| PVX_122745 | 0.5172  | 0.4612  | 0.3029  | 0.0187  | -0.4448 | -0.0229 | 0.0427  | 0.5506  | 0.7012  |
| PVX_081570 | 0.5085  | 0.1927  | 0.0152  | -0.0731 | -0.0715 | -0.1543 | 0.3784  | 0.7863  | 0.9085  |
| PVX_086100 | -0.6735 | -0.1281 | 0.3008  | 0.2872  | 0.1481  | 0.4455  | 0.0848  | -0.4082 | -0.5247 |
| PVX_099070 | 0.2138  | -0.1796 | 0.2377  | 0.498   | 0.495   | 0.7875  | 0.3142  | -0.0891 | 0.0979  |
| PVX_080150 | 1.0365  | 0.289   | -0.066  | -0.4047 | -0.4223 | -0.1113 | 0.3435  | 0.9304  | 1.2079  |
| PVX_114910 | 0.0474  | 0.2694  | 0.3266  | 0.3017  | 0.145   | 0.1205  | -0.7456 | -1.4194 | -1.2048 |
| PVX_122080 | 0.3723  | 0.4191  | 0.346   | 0.1404  | 0.2344  | 0.1682  | -0.4369 | -0.4568 | -0.4535 |
| PVX_087715 | 0.3227  | 0.2699  | 0.4187  | 0.5389  | 0.3403  | 0.2595  | -0.2559 | -0.5921 | -0.4422 |
| PVX_098635 | 0.353   | 0.2673  | -0.147  | -0.5854 | -0.7705 | -0.8963 | -0.5257 | 0.2446  | 1.045   |
| PVX_099330 | 0.0031  | -0.0968 | 0.0809  | 0.3685  | 0.5269  | 0.7222  | 0.284   | 0.1159  | 0.1897  |
| PVX_118310 | -0.4187 | -0.5644 | -0.4979 | -0.2079 | 0.3057  | 0.8769  | 0.3883  | -0.1281 | -0.1629 |
| PVX_093670 | -0.2769 | -0.3313 | -0.3945 | -0.2082 | -0.1242 | -0.0665 | 0.3421  | 1.0968  | 0.9287  |
| PVX_089830 | 0.203   | 0.3461  | 0.1837  | -0.2714 | -1.3065 | -1.4564 | -0.8346 | 0.9029  | 0.8196  |
| PVX_092970 | -0.5035 | -0.243  | 0.2404  | 0.5814  | 0.5076  | 0.1644  | -0.5776 | -0.4732 | -0.0881 |
| PVX_084175 | -0.4    | -0.2671 | 0.1407  | 0.2363  | 0.3933  | 0.5291  | 0.4437  | 0.0253  | 0.14    |
| PVX_089920 | 0.2128  | -0.1597 | 0.068   | 0.2142  | 0.1238  | 0.333   | 0.1426  | -0.3759 | -0.1908 |
| PVX_099300 | 0.4013  | 0.4684  | 0.5318  | 0.6108  | 0.5809  | 0.2299  | -0.4882 | -0.7718 | -0.9132 |
| PVX_116655 | -0.139  | -0.3326 | -0.0674 | 0.2996  | 0.5378  | 0.2192  | 0.0389  | 0.0884  | 0.0238  |
| PVX_099220 | 0.819   | 0.7951  | 0.4516  | 0.1932  | -0.093  | 0.1205  | 0.3289  | 0.8649  | 1.3286  |
| PVX_024685 | 1.1572  | 0.5804  | 0.2933  | 0.299   | -0.1021 | -0.415  | -0.696  | -0.8095 | -0.3817 |
| PVX_084895 | 0.403   | 0.463   | 0.3394  | 0.3098  | 0.5026  | -0.6619 | -0.569  | -0.6901 | -0.9028 |
| PVX_107755 | 0.5023  | 0.7243  | 0.388   | 0.2385  | 0.3937  | 0.0833  | 0.3421  | -0.1954 | 0       |
| PVX_088870 | 0.3441  | 0.1233  | -0.0377 | -0.0074 | 0.5058  | 0.2937  | 0.2576  | 0.2352  | 0.6296  |
| PVX_123590 | 0.0579  | -0.1788 | -0.3949 | -0.4845 | -0.5179 | 0.1298  | 0.5855  | -0.2414 | -0.5063 |
| PVX_095175 | -0.1243 | 0.1556  | 0.111   | 0.0523  | -0.2706 | 0.2368  | 0.8409  | 0.3956  | 0.2844  |
| PVX_089165 | -0.1613 | 0.4876  | 0.6524  | 0.5801  | 0.186   | -0.3644 | -1.0247 | -0.8345 | -0.8894 |
| PVX_091150 | 0.0803  | -0.3459 | 0.1622  | 0.5337  | 1.0748  | 0.1575  | 0.0231  | 0.3353  | 0.5254  |
| PVX_082680 | -2.0619 | -2.1557 | -2.4322 | -2.7351 | -2.3128 | 0.1561  | 1.087   | 0.3618  | -0.8218 |
| PVX_098035 | -0.1269 | -0.6982 | -0.8187 | -0.5301 | -0.1382 | 0.9867  | 0.6305  | 0.5386  | -0.0981 |
| PVX_117600 | 0.1944  | 0.8028  | 0.8738  | 0.9073  | 0.5024  | -0.8989 | -0.9741 | -0.2674 | -0.0371 |
| PVX_118395 | -0.1538 | 0.2304  | 0.4564  | 0.4932  | 0.5072  | 0.3105  | 0.3289  | 0.0574  | 0.0508  |
| PVX_094500 | 0.9413  | 0.157   | -0.3119 | -0.3836 | -0.5257 | 0.0438  | 0.4264  | 1.0519  | 1.3633  |
| PVX_003890 | 0.0875  | 0.5825  | 0.7144  | 0.7072  | 0.2918  | -0.0525 | -0.3934 | -0.5334 | -0.5224 |
| PVX_000925 | -0.9819 | -0.1131 | 0.1198  | 0.4372  | 0.6948  | 0       | -1.0718 | -1.1699 | -0.9205 |
| PVX_111200 | 0.6339  | 0.3385  | 0.2376  | 0.2592  | -0.2751 | -0.5173 | -0.4664 | 0.3475  | 0.8558  |
| PVX_113335 | 1.1088  | 0.8415  | 0.8762  | 0.9391  | 0.4095  | -0.2587 | -0.8131 | -1.0579 | -0.9593 |
| PVX_002885 | -0.9774 | -0.8809 | -0.4069 | -0.0963 | 0.4881  | 0.8631  | 0.7096  | -0.0349 | -0.5815 |
| PVX_091300 | -1.0484 | -1.1131 | -1.1881 | -1.1997 | -1.275  | -1.0252 | 1.1112  | 1.3113  | 0.516   |
| PVX_115060 | -0.759  | -1.1834 | -0.6509 | 0.1428  | 0.5887  | 1.115   | 0.6722  | 0.104   | -0.0924 |
| PVX_114375 | 0.0609  | 0.0389  | -0.052  | -0.478  | -1.3661 | -1.3501 | 0.3547  | 1.2279  | 1.1555  |
| PVX_100670 | 0.3403  | 0.0735  | 0.193   | -0.2868 | 0.3767  | 0.1561  | 0.5701  | 0.4383  | 0.508   |
| PVX_096135 | -0.1215 | 0.2682  | 0.3778  | 0.2996  | 0.2804  | -0.4754 | -0.6816 | -0.5133 | -0.4547 |
| PVX_003630 | 0.8942  | 0.0096  | -0.1788 | 0.1277  | 0.2515  | 0.0153  | 0.5628  | 0.904   | 0.8914  |
| PVX_091435 | -0.6218 | -0.4406 | -0.3646 | -0.2157 | -0.3147 | -0.4504 | 0.8316  | 0.7349  | 0.0547  |
| PVX_003490 | 0.3219  | 0.3802  | 0.4203  | -0.1347 | -0.2653 | -0.3679 | -0.2502 | -0.2581 | -0.3741 |
| PVX_113825 | -1.2596 | -1.2379 | -1.2877 | -1.2156 | -0.801  | 0.1809  | 1.0812  | 0.636   | -0.1963 |
| PVX_089505 | -0.5425 | -0.2168 | 0.0393  | 0.1208  | 0.2619  | 0.2091  | 0.1386  | -0.5248 | -0.5642 |
| PVX_122460 | -0.0136 | -0.4034 | -0.7016 | -0.3693 | 0.2649  | 0.8611  | 0.2663  | 0.1784  | 0.4899  |
| PVX_089780 | 1.2538  | 0.4204  | 0.0324  | -0.2381 | -0.4487 | -0.5859 | -0.1926 | -0.3231 | 0.1768  |

|            |         |         |         |         |         |         |         |         |         |
|------------|---------|---------|---------|---------|---------|---------|---------|---------|---------|
| PVX_122450 | -0.8417 | -0.483  | 0.5035  | 0.9539  | 0.911   | 0.3759  | 0.0525  | -0.3257 | -0.5585 |
| PVX_001970 | 0.0638  | -0.0458 | 0.3407  | 0.4856  | 0.593   | -0.3565 | -0.9044 | -0.6764 | -0.3436 |
| PVX_089995 | 0.0687  | -0.1081 | -0.0674 | 0.1424  | 0.0637  | -0.0735 | -0.0743 | 0.0822  | 0.1179  |
| PVX_101180 | -0.0104 | -0.283  | -0.4896 | -0.4138 | -0.3391 | -0.4379 | -0.499  | -0.4473 | -0.55   |
| PVX_083500 | 1.2184  | 0.8637  | 0.5889  | 0.4761  | -0.0277 | -0.9489 | -0.9654 | -0.9249 | -0.3418 |
| PVX_081845 | 0.7519  | 0.3599  | 0.1333  | -0.3567 | -0.829  | -0.609  | -0.4574 | -0.4086 | 0.1435  |
| PVX_085380 | -0.681  | 0.3076  | 0.426   | 0.6289  | 0.4352  | 0.0139  | -0.6405 | -1.0446 | -0.9942 |
| PVX_094870 | 0.9514  | 0.1488  | -0.3197 | -0.4674 | -0.8096 | -1.0016 | -0.9366 | 0.4353  | 0.7414  |
| PVX_081750 | 0.0577  | 0.4448  | 0.4919  | 0.5254  | 0.2674  | 0.0931  | -0.0936 | -0.139  | -0.2359 |
| PVX_083050 | -1.1348 | -1.2723 | -1.3884 | -1.2495 | -0.7109 | 0.2961  | 1.1975  | 0.4516  | -0.0176 |
| PVX_084545 | -0.2704 | 0.7068  | 0.6964  | 0.6663  | 0.2546  | -0.8566 | -1.0736 | -1.0965 | -0.8816 |
| PVX_091080 | 0.2067  | 0.1413  | 0.0197  | 0.0409  | -0.167  | 0.1732  | 0.1594  | -0.0621 | 0.2147  |
| PVX_094330 | -0.4506 | 0.3119  | 0.6216  | 0.562   | 0.7619  | 0.4537  | -0.23   | -0.5172 | -0.5831 |
| PVX_091515 | -0.154  | 0.4028  | 0.4224  | 0.247   | 0.2709  | 0       | -0.2819 | -0.7327 | -0.8851 |
| PVX_093665 | 1.2235  | 0.8894  | 0.7307  | 0.5448  | 0.4564  | -0.1092 | -0.4557 | -0.3706 | -0.1667 |
| PVX_119430 | 0.7181  | 0.4931  | 0.3404  | 0.1195  | 0.356   | 0.4142  | 0.6207  | 0.2367  | -0.1189 |
| PVX_083145 | 0.163   | -0.014  | 0.0846  | 0.1311  | 0.3015  | 0.1996  | 0.1727  | -0.024  | 0.1052  |
| PVX_098965 | 0.2819  | -0.2532 | -0.3844 | -0.3592 | -0.2411 | 0.6408  | 0.8238  | 0.4097  | 0.1823  |
| PVX_096345 | 0.3384  | 0.0713  | -0.4403 | -0.7423 | -0.2172 | 0.6911  | 0.8798  | 0.6095  | 0.8686  |
| PVX_118485 | -0.72   | -0.7102 | -1.2855 | -1.2124 | -0.0962 | 0.8292  | 1.2228  | 0.5566  | 0.1388  |
| PVX_087685 | -0.1682 | 0.6639  | 0.6495  | 0.5206  | 0.7156  | 0.064   | -0.2512 | -0.4645 | -0.1403 |
| PVX_124710 | 1.2589  | 1.2793  | 1.0396  | 0.652   | -0.0276 | -0.4423 | -0.1419 | -0.2762 | -0.0254 |
| PVX_111115 | -0.4596 | 0.0427  | 0.2264  | 0.4071  | 0.6642  | 0.6147  | -0.1307 | -0.8408 | -0.8482 |
| PVX_002480 | 0.8865  | 0.6983  | 0.4116  | 0.2587  | -0.3729 | -0.4498 | -0.6348 | -0.4707 | -0.1011 |
| PVX_116680 | -0.0744 | 0.1323  | 0.4773  | 0.662   | 0.7703  | 0.6091  | -0.0575 | -0.6626 | -0.9189 |
| PVX_082455 | -0.1172 | 0.0988  | 0.0965  | 0.0328  | -0.1611 | -0.361  | 0.0781  | 0.5066  | 0.0843  |
| PVX_082655 | -1.891  | -1.836  | -1.989  | -2.3027 | -2.108  | -0.1487 | 1.8495  | 1.4506  | 0.3275  |
| PVX_100530 | 0.0673  | -0.072  | 0.3349  | 0.743   | 0.5925  | 0.3451  | -0.122  | 0.0723  | 0.3237  |
| PVX_087735 | 0.4302  | 0.4037  | 0.4171  | 0.3382  | 0.0245  | -0.4535 | -0.3268 | -0.0868 | -0.2795 |
| PVX_085815 | 0.523   | 0.8176  | 0.7771  | 0.6291  | 0.3334  | -0.075  | -0.7354 | -1.201  | -1.2096 |
| PVX_122635 | -0.7949 | -1.2652 | -1.3155 | -1.3612 | -1.1346 | 0.4458  | 1.4285  | 1.1596  | 0.4741  |
| PVX_114345 | 0.4598  | 0.7039  | 0.4227  | 0.062   | -0.0064 | -0.041  | 0.4062  | 0.9333  | 0.7546  |
| PVX_000860 | -0.7355 | -0.5655 | -0.8852 | -0.7062 | -0.3558 | 0.4509  | 0.9006  | 0.7612  | 0.056   |
| PVX_092275 | -1.5554 | -1.2985 | -1.2977 | -1.491  | -1.6987 | -1.9201 | -0.4516 | 0.816   | 0.5815  |
| PVX_084590 | 0.6771  | 0.6125  | 0.6322  | 0.3977  | 0.388   | 0.5144  | -0.0392 | -0.372  | -0.3355 |
| PVX_116495 | -0.7395 | -0.974  | -0.3755 | 0.6705  | 0.3707  | 0.0996  | -0.4759 | -0.6413 | -0.5609 |
| PVX_081305 | 0.6197  | 0.5247  | 0.307   | 0.1607  | -0.08   | 0.5034  | 0.1968  | -0.1987 | -0.3129 |
| PVX_123335 | -0.1052 | 0.0392  | -0.0027 | -0.1495 | -0.4466 | -0.5432 | -0.8486 | 1.0399  | 1.2604  |
| PVX_116515 | 0.8044  | 0.4351  | 0.276   | -0.3454 | -0.613  | -0.425  | 0.3314  | 1.4484  | 1.744   |
| PVX_086230 | 0.1486  | 0.6618  | 0.6671  | 0.5676  | 0.3124  | -0.6375 | -0.6166 | 0.0623  | 0.4853  |
| PVX_118140 | 0.7296  | 0.5104  | 0.4775  | 0.4185  | 0.3511  | 0.1689  | -0.2966 | -0.4778 | -0.159  |
| PVX_122805 | 0.1767  | 0.2872  | 0.3132  | 0.3058  | 0.3659  | 0.4279  | 0.7479  | 0.7755  | 0.8485  |
| PVX_002690 | 0.0547  | -0.0903 | -0.0826 | -0.1113 | 0.4051  | 0.3136  | 0.7211  | 0.5722  | 0.2072  |
| PVX_082485 | 0.066   | 0.2115  | 0.1454  | 0.0464  | -0.0094 | -0.0126 | 0.7328  | 0.6893  | 0.3162  |
| PVX_088050 | 0.4937  | 0.6927  | 0.5997  | 0.4812  | 0.4361  | 0.1632  | -0.0787 | -0.4036 | -0.5799 |
| PVX_085110 | -0.4392 | 0.3559  | 0.214   | 0.2444  | 0.0557  | 0.1063  | -0.1266 | -0.6657 | -0.6183 |
| PVX_090230 | -0.6286 | -0.4454 | -0.1693 | -0.1233 | -0.087  | -0.1611 | 0.3973  | -0.0763 | -0.6031 |
| PVX_084630 | 0.2372  | 0.4435  | 0.4407  | 0.5738  | 0.3686  | 0.4979  | -0.1251 | -0.1063 | 0.0844  |
| PVX_115380 | 0.0386  | 0.0737  | -0.1978 | -0.6338 | -0.6448 | -0.7453 | 0.0984  | 0.122   | 0.3196  |
| PVX_114875 | -0.4306 | -0.4659 | -0.1069 | 0.1776  | 0.4918  | 0.5832  | 0.4682  | 0.4804  | 0.1222  |
| PVX_094395 | 0.408   | 0.0256  | 0.0524  | 0.1181  | 0.2064  | 0.8267  | 0.4125  | 0.1746  | 0.1708  |
| PVX_093610 | 0.3883  | 0.1964  | -0.0952 | -0.278  | -0.2116 | -0.2422 | 0.4824  | 0.8132  | 0.9779  |
| PVX_095285 | -0.1035 | -0.0636 | -0.1783 | -0.3803 | -0.0012 | 0.9166  | 1.0709  | 0.5002  | 0.1349  |
| PVX_095275 | 0.5457  | 0.757   | 0.6805  | 0.6999  | 0.6555  | 0.0032  | -0.6648 | -0.8827 | -0.57   |
| PVX_124110 | -0.3254 | -0.2253 | 0.1225  | 0.3538  | 0.6159  | 0.2077  | -0.7734 | -0.7577 | -0.568  |
| PVX_113900 | 0.4371  | 0.2221  | 0.1948  | 0.0788  | 0.1902  | 0.2047  | 0.4521  | 0.4693  | 0.5662  |
| PVX_122660 | -0.4893 | 0.2012  | 0.4758  | 0.3742  | 0.2017  | 0.6199  | 0.2309  | -0.2768 | -0.4644 |
| PVX_085050 | -0.5522 | -0.1202 | -0.0272 | 0.0753  | 0.2391  | 0.3513  | 0.0909  | -0.7468 | -1.1327 |
| PVX_080120 | -0.9082 | -1.3788 | -1.9421 | -1.9346 | -1.4875 | -0.2245 | 1.3856  | 0.7315  | 0.1149  |
| PVX_124065 | -0.5769 | -0.1578 | 0.0007  | 0.1003  | 0.5608  | 0.6395  | 0.2528  | -0.2898 | -0.4031 |
| PVX_002795 | 0.1217  | 0.1279  | 0.0141  | -0.1005 | 0.053   | -0.1569 | 0.3989  | 0.6705  | 0.3547  |
| PVX_116985 | 0.4732  | 0.1899  | 0.022   | -0.1738 | 0.1981  | 0.6012  | 0.4373  | 0.6787  | 0.9954  |
| PVX_092565 | -0.0735 | 0.2995  | 0.1767  | 0.0931  | 0.1779  | -0.0352 | -0.2997 | -0.1873 | -0.6398 |

|            |         |         |         |         |         |         |         |         |         |
|------------|---------|---------|---------|---------|---------|---------|---------|---------|---------|
| PVX_001885 | -0.5076 | -0.1794 | -0.3816 | 0.0588  | 0.7166  | 0.758   | 0.3091  | -0.3196 | -0.1939 |
| PVX_114010 | -0.1951 | -0.5457 | -0.7907 | -0.2434 | -0.0037 | 0.2081  | 0.3579  | 0.1754  | 0.019   |
| PVX_117225 | -0.1313 | -0.0945 | -0.1795 | -0.3792 | -0.7688 | -0.2546 | 0.4562  | 0.2659  | 0.2806  |
| PVX_094820 | 0.6531  | 0.3914  | 0.2496  | 0.0486  | 0.1207  | 0.6373  | 0.7574  | 0.0242  | 0.1544  |
| PVX_099655 | 0.7804  | 0.3579  | 0.0128  | -0.5695 | -0.8956 | -0.6815 | -0.4073 | 0.5082  | 1.4063  |
| PVX_094445 | 0.2481  | 0.2728  | 0.4419  | 0.5531  | 0.4089  | 0.1098  | -0.1297 | -0.2468 | -0.2141 |
| PVX_114205 | 0.3533  | 0.5001  | 0.5135  | 0.6134  | 0.0378  | -0.6744 | -0.4758 | -0.2923 | -1.0354 |
| PVX_123565 | 0.8328  | 0.5872  | 0.1878  | 0.0822  | -0.0518 | 0.0493  | 0.1054  | 0.1911  | 0.1236  |
| PVX_095390 | 0.2507  | 0.3779  | 0.3041  | 0.1928  | 0.4114  | 0.3364  | -0.5424 | -0.9672 | -0.9933 |
| PVX_091010 | 0.0999  | 0.4241  | 0.6163  | 0.9332  | 0.6995  | 0.2225  | 0.0605  | -0.1789 | -0.1259 |
| PVX_117425 | -1.1061 | -1.1676 | -1.1352 | -1.3073 | -1.0158 | 0.3168  | 0.526   | 1.335   | 0.9732  |
| PVX_081780 | -0.8334 | -0.0644 | 0.3635  | 0.3704  | 0.627   | 0.4887  | -0.0388 | -0.3552 | -0.3754 |
| PVX_124050 | 0.2232  | 0.1581  | 0.1683  | -0.0415 | 0.0926  | -0.6148 | -0.5607 | 0.0479  | -0.2511 |
| PVX_086865 | -1.0847 | -0.9243 | -0.8528 | -1.0879 | -0.6889 | -0.7677 | -0.7595 | -0.7774 | -0.9173 |
| PVX_122145 | -0.3752 | -0.3931 | -0.2519 | -0.0425 | 0.1433  | 1.2136  | 0.4043  | -0.2433 | -0.2091 |
| PVX_123810 | -0.1584 | -0.2553 | -0.0932 | 0.0206  | 0.0771  | 0.1536  | 0.0656  | -0.0147 | -0.1509 |
| PVX_098905 | 0.7221  | 0.5696  | 0.5661  | 0.3688  | 0.3065  | 0.062   | -0.3386 | 0.0356  | 0.7907  |
| PVX_119725 | -0.1827 | -0.5192 | -0.604  | -0.5527 | -0.4476 | 0.4506  | 0.8709  | 0.5923  | 0.0125  |
| PVX_082635 | 0.2432  | -0.1957 | -0.4665 | -0.2937 | 0.2943  | 0.5122  | 0.439   | 0.441   | 0.9408  |
| PVX_119485 | 0.224   | -0.2588 | -0.3159 | -0.5334 | -0.73   | -0.6299 | 0.7012  | 1.003   | 0.7135  |
| PVX_122010 | 0.6049  | 0.0492  | -0.177  | -0.0822 | 0.0904  | 0.0918  | -0.4417 | -0.6737 | -0.3622 |
| PVX_082350 | -0.1395 | -0.5717 | -0.8069 | -0.9265 | -0.5122 | 0.4324  | 0.7391  | 0.4408  | 0.4299  |
| PVX_091745 | 0.2345  | 0.0225  | -0.1357 | -0.2931 | -0.1195 | 0.5447  | 0.3704  | 0.1254  | 0.2594  |
| PVX_087785 | -0.1586 | -0.5975 | -0.678  | -0.8956 | -0.3999 | 0.132   | 1.1236  | 1.0059  | 0.5391  |
| PVX_091625 | -0.6936 | -0.3885 | -0.3248 | -0.4424 | -0.5502 | -0.8702 | 0.3232  | 1.1164  | 0.5498  |
| PVX_094305 | 1.2422  | 0.1774  | -0.2991 | -0.6256 | -0.9936 | -1.5371 | -1.0756 | 1.1066  | 1.1653  |
| PVX_103160 | -0.2594 | -0.3047 | -0.1534 | -0.291  | -0.6695 | -0.8465 | -1.0316 | -0.1474 | 0.0982  |
| PVX_101250 | 0.2026  | 0.4029  | 0.3073  | 0.3387  | 0.2581  | 0.2078  | 0.2411  | 0.3587  | 0.2228  |
| PVX_094510 | 0.2026  | -0.1338 | -0.0955 | -0.2557 | -0.4697 | -0.4241 | -0.1566 | 0.0996  | 0.9537  |
| PVX_087025 | 0.2028  | 0.3478  | 0.5434  | 0.5729  | 0.6006  | 0.7782  | 0.4124  | 0.1646  | 0.1823  |
| PVX_094260 | 0.0711  | 0.1762  | 0.1102  | 0.0183  | -0.155  | -0.1457 | -0.5662 | 0.8611  | 0.9938  |
| PVX_095160 | -0.4462 | -0.168  | 0.3511  | 0.6087  | 0.8888  | 0.4446  | 0.2847  | 0.2957  | 0.3335  |
| PVX_095485 | -0.964  | -1.0681 | -0.1098 | 0.8594  | 0.8525  | 0.2719  | -0.1715 | -0.6084 | -0.9297 |
| PVX_084635 | -0.484  | 0.3975  | 0.5468  | 0.8409  | 0.711   | 0.1     | -0.5378 | -0.6884 | -0.6411 |
| PVX_117550 | 1.0243  | 0.6218  | 0.6454  | 0.6242  | 0.4581  | 0.2601  | -0.5645 | -0.6553 | -0.3795 |
| PVX_003640 | 0.093   | 0.1823  | 0.1175  | -0.024  | -0.1614 | -0.6224 | -1.2422 | -0.2174 | 0.1075  |
| PVX_099685 | 0.3616  | 0.3574  | 0.2778  | 0.2804  | -0.1424 | 0.0388  | 0.1023  | 0.1384  | 0.4787  |
| PVX_092155 | 0.2974  | 0.5647  | 0.6613  | 0.5059  | 0.2838  | 0.2929  | -0.3841 | -0.6145 | -0.779  |
| PVX_119395 | -0.5387 | 0.0402  | 0.2464  | 0.568   | 0.4309  | 0.2478  | -0.5007 | -0.5517 | -0.4218 |
| PVX_108760 | 1.3077  | 0.8732  | 0.5478  | 0.2534  | 0.0301  | -0.5022 | -0.8109 | -0.8564 | -0.2532 |
| PVX_102125 | -0.2698 | -0.17   | -0.0751 | -0.181  | -0.0232 | 0.0345  | -0.4073 | -0.3214 | -0.4937 |
| PVX_091825 | 0.288   | -0.1834 | -0.1296 | -0.0798 | -0.3118 | -0.6755 | 0.6425  | 0.8291  | 0.6438  |
| PVX_000995 | -1.6117 | -1.5617 | -1.6899 | -2.0658 | -2.2149 | -1.3137 | 1.4684  | 1.5144  | 0.6562  |
| PVX_098995 | -0.9029 | -1.0162 | -1.3602 | -1.3374 | -1.1452 | -1.4335 | 0.782   | 1.0412  | 0.5222  |
| PVX_003605 | 0.645   | -0.2573 | -0.8717 | -1.1671 | 0.1088  | -0.0947 | -0.3251 | 0.5101  | 1.2711  |
| PVX_089180 | -0.1998 | -0.2162 | -0.3913 | -1.0677 | -0.5895 | -0.0751 | 0.0166  | -0.1133 | -0.2407 |
| PVX_094640 | 1.0804  | 0.6149  | 0.5724  | 0.3859  | -0.3176 | -0.6871 | -1.2999 | -1.4236 | -1.0092 |
| PVX_122480 | 0.4201  | 0.0405  | 0.1411  | -0.2336 | -0.1116 | 0.1169  | 0.2357  | 0.1811  | 0.5056  |
| PVX_092200 | -0.4651 | 0.0979  | 0.2371  | 0.2392  | 0.2618  | 0.0037  | 0.0471  | 0.003   | -0.4718 |
| PVX_117785 | 0.9604  | 0.5592  | 0.6349  | 0.2588  | -0.4872 | -0.9718 | -0.6392 | -0.3656 | 0.2837  |
| PVX_086255 | 0.058   | -0.3481 | -0.6209 | -0.8396 | -0.4764 | -0.1592 | 0.3865  | 0.5138  | 0.6831  |
| PVX_114565 | 0.4927  | -0.0087 | -0.4481 | -0.6465 | -0.6923 | -0.7529 | -0.7643 | -0.476  | -0.4275 |
| PVX_117315 | 0.741   | 0.3621  | 0.0374  | -0.3307 | -0.5795 | -0.4239 | -0.2789 | 0.0584  | 0.4515  |
| PVX_113260 | -0.6353 | -0.865  | -0.9163 | -1.0194 | -1.6454 | -1.7811 | -0.5091 | 0.9499  | 0.7401  |
| PVX_122245 | 0.4936  | 0.5563  | 0.6592  | 0.5286  | 0.2559  | 0.0685  | -0.4117 | -0.7058 | -0.6467 |
| PVX_001065 | -0.7717 | -0.5177 | -0.7611 | -0.1408 | 0.8355  | 0.959   | 0.2427  | -0.3494 | -0.3149 |
| PVX_123040 | 0.4308  | 0.4854  | 0.2726  | -0.1322 | -0.2197 | -0.3639 | -0.3208 | 0.1504  | 0.9343  |
| PVX_006080 | 2.0367  | 2.1864  | 1.7878  | 1.4321  | 0.676   | 0.1393  | -0.0547 | -0.3934 | 0.0674  |
| PVX_089465 | -0.0216 | 0.2515  | 0.3136  | 0.312   | 0.2878  | 0.3603  | -0.2815 | 0.0623  | 0.2738  |
| PVX_081300 | 0.1375  | 0.3666  | 0.4657  | 0.3634  | 0.5629  | 0.5626  | 0.0965  | -0.3721 | -0.6127 |
| PVX_084380 | 0.5516  | -0.1595 | -0.2463 | -0.164  | -0.0626 | 0.2485  | 0.2265  | 0.7504  | 1.0628  |
| PVX_081820 | -1.3442 | -1.3959 | -1.6002 | -0.8032 | 0.1293  | 0.8779  | 0.5466  | -0.1168 | -0.6305 |
| PVX_086225 | 1.0237  | 0.0294  | -0.5087 | -1.1308 | -1.5271 | -1.0644 | 0.1113  | 1.0585  | 1.656   |



|            |         |         |         |         |         |         |         |         |         |
|------------|---------|---------|---------|---------|---------|---------|---------|---------|---------|
| PVX_094800 | 0.445   | 0.5969  | 0.3235  | 0.0699  | 0.3342  | 0.2668  | -0.1354 | -0.3551 | -0.0394 |
| PVX_100895 | -0.7925 | -0.555  | -0.8171 | -1.2415 | -1.2745 | -1.0548 | -0.2164 | 1.1367  | 1.2299  |
| PVX_087995 | 0.1296  | 0.1963  | 0.3216  | 0.2778  | 0.3991  | 0.5234  | 0.1828  | -0.0992 | -0.1298 |
| PVX_088255 | 0.0413  | 0.1213  | -0.0075 | -0.3312 | -0.2054 | 0.0005  | 0.1221  | -0.0636 | -0.0617 |
| PVX_117660 | 0.2103  | 0.1949  | 0.4411  | 0.5495  | 0.4847  | 0.2146  | 0.1447  | 0.2611  | 0.3562  |
| PVX_115160 | 0.1139  | 0.1935  | 0.0828  | 0.1641  | 0.3434  | 0.4031  | 0.161   | -0.1917 | -0.0684 |
| PVX_083230 | -0.0655 | -0.1458 | 0.348   | 0.7006  | 0.7574  | 0.5033  | 0.1128  | 0.3515  | 0.0937  |
| PVX_080100 | 0.2035  | 0.6421  | 0.5541  | 0.4711  | 0.1728  | -0.1977 | -1.1697 | -0.0022 | 0.4428  |
| PVX_099860 | 0.2314  | 0.4265  | 0.3207  | 0.1318  | 0.3259  | -0.3271 | -0.7711 | -0.3351 | 0.1566  |
| PVX_091265 | -0.5509 | -0.1868 | 0.4182  | 0.3123  | 0.3853  | -0.1649 | -0.6879 | -0.4131 | -0.4304 |
| PVX_085260 | -0.9582 | -0.3809 | 0.1504  | 0.3276  | 0.385   | 0.3544  | 0.3319  | -0.1381 | -0.2238 |
| PVX_117875 | 0.8853  | 0.8448  | 0.5426  | 0.6221  | 0.4754  | 0.0591  | -0.0555 | -0.101  | -0.2252 |
| PVX_101335 | -0.3597 | 0.0263  | 0.2032  | 0.049   | 0.1833  | 0.7864  | 0.5598  | 0.1172  | -0.2315 |
| PVX_099440 | -0.229  | -0.6097 | -0.7227 | -0.4172 | 0.1197  | 0.6758  | 0.6346  | 0.1358  | 0.116   |
| PVX_096260 | 1.1344  | 0.8473  | 0.1213  | -0.3278 | -0.2849 | -0.1371 | 1.0463  | 1.2056  | 1.2736  |
| PVX_123060 | -0.1899 | -0.0914 | 0.3504  | 0.4121  | 0.2921  | -0.2162 | -1.2001 | -0.5023 | -0.0792 |
| PVX_081335 | -0.2539 | -0.4941 | -0.8039 | -1.1217 | -1.1963 | -0.8236 | 0.0416  | 1.1319  | 0.8884  |
| PVX_117165 | 0.4087  | 0.352   | -0.1521 | -0.5887 | -0.8033 | -0.8951 | -0.5098 | 0.3251  | 1.3298  |
| PVX_001635 | 0.4022  | 0.062   | -0.1153 | -0.0034 | -0.3894 | -0.25   | -0.0379 | -0.0842 | 0.0834  |
| PVX_086060 | 0.0134  | -0.1336 | -0.2312 | -0.3425 | -0.1233 | 0.1537  | 0.1267  | 0.1353  | 0.4498  |
| PVX_083070 | -0.3374 | -0.2703 | 0.1573  | 0.4314  | 0.5333  | 0.3279  | 0.0283  | -0.181  | -0.2498 |
| PVX_100700 | 0.5039  | 0.0367  | 0.0966  | -0.226  | -0.0607 | 0.1634  | 0.6319  | 0.7331  | 0.8924  |
| PVX_096945 | -0.09   | -0.2835 | -0.3553 | -0.2779 | -0.2971 | -0.1537 | -0.3065 | -0.2074 | -0.2732 |
| PVX_001765 | 0.039   | -0.0807 | -0.1946 | -0.1617 | 0.0273  | -0.0521 | 0.6203  | 0.7295  | 0.6016  |
| PVX_088150 | -1.0881 | -0.5314 | -0.0741 | 0.2001  | 0.2988  | 0.4292  | 0.2974  | -0.2167 | -0.4203 |
| PVX_113885 | 0.2561  | 0.4065  | 0.2641  | 0.0769  | -0.0023 | 0.2864  | 0.1005  | -0.302  | -0.5355 |
| PVX_114900 | 0.2546  | -0.056  | -0.2698 | -0.9494 | -1.2109 | -1.0675 | -0.7278 | 0.0625  | 1.0886  |
| PVX_108770 | 0.698   | 0.8236  | 0.6205  | 0.6268  | -0.2113 | -0.9011 | -1.1195 | -1.1563 | -0.8023 |
| PVX_123790 | 0.282   | -0.1203 | -0.4501 | -0.2935 | -0.5166 | 0.2568  | 0.3949  | -0.036  | -0.3575 |
| PVX_092830 | -0.5329 | -0.1042 | 0.2961  | 0.545   | 0.5744  | 0.0225  | -0.2315 | -0.218  | -0.1975 |
| PVX_101600 | -0.0591 | -0.6121 | -0.897  | -1.0333 | -1.2154 | -0.9126 | -0.9306 | -1.3828 | -1.2457 |
| PVX_115455 | 0.3117  | 0.1583  | -0.0474 | -0.2421 | -0.2498 | -0.1832 | 0.4836  | 0.7823  | 0.9006  |
| PVX_124190 | 0.3791  | 0.1893  | 0.2683  | 0.2102  | 0.2999  | 0.4202  | 0.2582  | 0.2063  | 0.878   |
| PVX_099450 | -0.3229 | -0.6724 | -0.7871 | -1.1324 | -0.9738 | -0.0429 | 0.8348  | 0.5339  | 0.1757  |
| PVX_082465 | 0.0275  | -0.1457 | 0.338   | 0.6032  | 0.3887  | 0.3244  | 0.0846  | -0.0489 | 0.1156  |
| PVX_094390 | 0.6405  | 0.58    | 0.6369  | 0.3889  | 0.5738  | 0.1534  | -0.4681 | -0.5216 | -0.3603 |
| PVX_097580 | 1.3738  | 0.9573  | 0.3158  | -0.1525 | -1.462  | -1.71   | -1.7479 | -1.0808 | -0.464  |
| PVX_093660 | -0.492  | -1.0109 | -0.6091 | 0.2291  | 0.3851  | 0.3155  | -0.4444 | -0.5201 | -0.1832 |
| PVX_079705 | -0.546  | -0.8016 | -0.3766 | 0.0592  | 0.1811  | 0.821   | 0.5136  | 0.1119  | -0.2132 |
| PVX_090165 | 0.2798  | 0.2859  | 0.3745  | 0.3081  | 0.4047  | 0.224   | -0.1607 | -0.5048 | -0.6169 |
| PVX_088800 | -0.0353 | 0.2174  | 0.5496  | 0.626   | 0.4229  | -0.1104 | 0.2219  | 0.0614  | 0.2408  |
| PVX_084975 | 0.1428  | 0.11    | 0.2299  | 0.2975  | 0.3574  | -0.0357 | 0.8274  | 0.8252  | 0.515   |
| PVX_115430 | 0.3831  | 0.4122  | 0.5874  | 0.5363  | 0.5488  | 0.4179  | -0.2282 | -0.2637 | 0.0594  |
| PVX_096050 | 1.4139  | -0.7779 | -1.2019 | -1.0587 | -1.2154 | -1.4193 | -1.5782 | -0.0613 | 0.5787  |
| PVX_089335 | 0.1718  | 0.1852  | -0.0017 | 0.027   | -0.0307 | 0.1119  | 0.296   | -0.3534 | -0.6938 |
| PVX_114645 | 0.9051  | 0.6654  | 0.4762  | 0.3416  | 0.1649  | 0.1509  | -0.3001 | -0.4269 | -0.2295 |
| PVX_093700 | 1.7421  | 1.1797  | 0.4056  | -0.3629 | -1.142  | -1.4081 | -1.1738 | -1.1807 | -0.0787 |
| PVX_123000 | -1.1053 | -0.893  | -0.1262 | 0.3553  | 0.7843  | 0.9507  | -0.2158 | -0.9008 | -0.699  |
| PVX_122535 | -0.9071 | -0.5166 | 0.0465  | 0.8124  | 0.7875  | 0.0286  | -0.1841 | -0.3247 | -0.3857 |
| PVX_088180 | 0.1985  | 0.2592  | 0.2508  | 0.0348  | -0.0252 | -0.1052 | -0.25   | -0.6527 | -0.976  |
| PVX_089755 | 0.013   | 0.4453  | 0.4574  | 0.4794  | 0.4605  | -0.0164 | -0.4293 | -0.5778 | -0.6892 |
| PVX_087965 | -0.6483 | -0.2577 | -0.325  | -0.1488 | -0.0015 | 0.0429  | -0.0653 | -0.3853 | -0.4432 |
| PVX_089205 | -0.213  | 0.158   | 0.2586  | 0.3526  | 0.0125  | -0.8249 | -0.9263 | -0.0171 | 0.0308  |
| PVX_091225 | -0.3906 | 0.2529  | 0.5112  | 0.7342  | 0.3722  | 0.2489  | -0.279  | -0.7153 | -0.3241 |
| PVX_093525 | 0.5622  | 0.0621  | -0.0143 | -0.1187 | -0.199  | -0.2723 | -0.0229 | 0.492   | 0.9315  |
| PVX_098720 | -0.0286 | -0.0043 | -0.1668 | -0.146  | 0.1069  | -0.1432 | 0.0742  | 0.0203  | -0.034  |
| PVX_097625 | 1.0376  | 0.8149  | 0.826   | 0.7488  | 0.7504  | 0.239   | -1.4903 | -1.8653 | -1.4283 |
| PVX_080185 | -0.692  | -0.9198 | 0.0798  | 0.655   | 0.8259  | 0.5296  | 0.1226  | -0.4137 | -0.5223 |
| PVX_084310 | 0.0179  | -0.7794 | -0.7391 | -0.0251 | 0.4381  | -0.4288 | -0.0144 | 0.7446  | 0.7233  |
| PVX_002575 | -0.06   | -0.2396 | -0.1392 | 0.3849  | 0.4415  | -0.0188 | -0.1406 | 0.1806  | 0.3748  |
| PVX_080205 | -0.7837 | -0.1348 | 0.2809  | 0.3837  | 0.608   | 0.0974  | -0.4265 | -0.7781 | -0.5494 |
| PVX_081740 | -0.993  | -0.6016 | -0.2652 | -0.0049 | 0.2788  | -0.0352 | -0.324  | -0.5337 | -0.5285 |
| PVX_114620 | 0.2245  | -0.5621 | -0.8763 | -1.0806 | -1.1284 | -0.735  | 1.2253  | 1.1209  | 0.8292  |

|            |         |         |         |         |         |         |         |         |         |
|------------|---------|---------|---------|---------|---------|---------|---------|---------|---------|
| PVX_117770 | 1.0615  | 0.7389  | 0.7504  | 0.7409  | 0.588   | -0.1252 | -0.7286 | -0.7891 | -0.3335 |
| PVX_085305 | 0.802   | -0.0074 | -0.1673 | -0.1068 | -0.0404 | -0.0204 | 0.9487  | 0.7484  | 0.2096  |
| PVX_087110 | 0.639   | 0.3344  | 0.1005  | -0.0574 | 0.1191  | 0.0423  | 0.5282  | 1.2541  | 1.3398  |
| PVX_114000 | 0.1383  | 0.3438  | 0.239   | -0.01   | -0.1105 | 0.2123  | 0.3194  | 0.2051  | -0.0201 |
| PVX_001895 | 1.298   | 0.8658  | 0.8127  | 0.7917  | 0.434   | -0.3269 | -0.4961 | -0.1757 | 0.0054  |
| PVX_081725 | -0.0154 | -0.2655 | 0.0933  | 0.3451  | 0.2431  | 0.553   | 0.1473  | 0.018   | 0.4211  |
| PVX_101490 | 0.5944  | 0.4041  | 0.0208  | 0       | -0.067  | -0.1665 | -0.2529 | -0.5901 | -0.5711 |
| PVX_095445 | 0.24    | 0.3083  | 0.1943  | 0.144   | 0.3358  | 0.0937  | 0.0605  | 0.043   | 0.0299  |
| PVX_089475 | -1.1625 | -1.229  | -1.0984 | -0.989  | -1.0532 | -0.7213 | -0.799  | 1.4308  | 1.5364  |
| PVX_083480 | 0.6082  | 0.6956  | 0.7706  | 0.6858  | 0.5715  | 0.8298  | -0.2362 | 0.8103  | 0.8435  |
| PVX_090325 | -1.0008 | -1.1705 | -1.258  | -1.3584 | -1.5976 | -1.8738 | -0.863  | 0.3303  | 0.2076  |
| PVX_099205 | -0.0925 | -0.0337 | -0.0151 | -0.0533 | -0.0679 | -0.421  | -0.2653 | -0.0398 | -0.1175 |
| PVX_124000 | 1.1111  | 0.827   | 0.8403  | 1.1238  | 0.9142  | 0.929   | 1.043   | 0.6289  | -0.0154 |
| PVX_080675 | -1.4007 | -0.8917 | -0.0784 | 0.2749  | 0.2373  | 0.6315  | 0.3569  | 0.2073  | -0.2114 |
| PVX_096140 | -0.1841 | -0.3745 | -0.235  | -0.1371 | -0.2472 | 0.0908  | -0.0582 | -0.3722 | -0.5118 |
| PVX_089450 | -0.8542 | -1.1175 | -1.4443 | -1.6811 | -1.6427 | -1.564  | -1.0067 | 0.9243  | 0.7255  |
| PVX_101230 | 0.3489  | 0.5061  | 0.6739  | 0.8643  | 0.4726  | 0.0486  | 0.1251  | -0.1025 | -0.1599 |
| PVX_091230 | 0.6027  | 0.1869  | -0.0908 | -0.5793 | -0.9066 | -0.4676 | 0.3257  | 0.8722  | 1.1584  |
| PVX_117060 | 0.1465  | 0.0979  | 0.1798  | 0.0982  | 0.2127  | -0.1053 | -0.0625 | -0.3536 | -0.7084 |
| PVX_086075 | 0.9863  | 0.7669  | 0.6094  | 0.4001  | -0.1252 | -1.0128 | -0.8829 | -0.4147 | -0.124  |
| PVX_001820 | 0.3624  | -0.0215 | -0.1431 | -0.3865 | -0.3585 | -0.2424 | 0.6969  | 0.7782  | 0.8265  |
| PVX_099365 | -1.0217 | -0.0553 | 0.2023  | 0.4231  | 0.235   | 0.3353  | -0.4162 | -0.3778 | -0.7386 |
| PVX_091835 | -0.2642 | -0.2102 | -0.0539 | -0.2144 | -0.0034 | 0.417   | 0.402   | 0.0507  | -0.4013 |
| PVX_122090 | -0.4202 | -0.2972 | 0.241   | 0.6535  | 0.7114  | 0.975   | 0.3231  | 0.0493  | -0.2467 |
| PVX_002490 | -0.2206 | -0.1525 | -0.1206 | 0.1222  | 0.2643  | 0.2594  | 0.1371  | -0.0759 | -0.1923 |
| PVX_114285 | 0.2793  | -0.0439 | -0.045  | 0.1236  | 0.5294  | 0.3554  | 0.4834  | 0.8751  | 0.8513  |
| PVX_101095 | -0.5019 | -0.9828 | -1.0375 | -1.1301 | -0.7282 | -0.4359 | 0.3168  | 0.3803  | -0.1461 |
| PVX_116595 | -0.7485 | -0.3458 | 0.0522  | 0.2083  | 0.163   | 0.0655  | -0.3907 | -0.4968 | -0.122  |
| PVX_091685 | -0.4242 | -0.5936 | -0.794  | -0.8845 | -0.7748 | 1.0373  | 1.1002  | 0.3774  | 0.0129  |
| PVX_086160 | -0.1905 | 0.5578  | 0.7033  | 0.7795  | 0.5622  | -0.244  | -0.6897 | -0.6636 | -0.409  |
| PVX_123185 | -0.2222 | -0.1148 | -0.1961 | -0.0489 | 0.3607  | 0.104   | 0.4477  | 0.5806  | 0.312   |
| PVX_090940 | 0.9463  | 0.4575  | 0.3501  | 0.5013  | 0.3236  | 0.5534  | 0.8709  | 0.887   | 0.6045  |
| PVX_091665 | -0.1035 | -0.2015 | -0.438  | -0.1473 | 0.3187  | 0.9748  | 0.8081  | 0.487   | 0.1368  |
| PVX_118290 | 0.8041  | 0.1884  | -0.2459 | -0.5141 | -0.2694 | -0.1955 | 0.1057  | 0.659   | 1.0817  |
| PVX_122935 | 0.4026  | -0.0629 | -0.2106 | -0.4626 | -0.7865 | -0.0985 | 0.3634  | 0.8093  | 0.9917  |
| PVX_118700 | 0.6992  | 0.0721  | -0.2709 | -0.5872 | -1.0702 | -1.104  | -1.0942 | 0.9614  | 1.5336  |
| PVX_094405 | -0.7017 | 0.1753  | 0.3969  | 0.4899  | 0.7326  | 0.6668  | -0.043  | -0.6633 | -0.7463 |
| PVX_113930 | 0.1808  | 0.2209  | 0.2959  | 0.4     | 0.4415  | 0.3847  | -0.0258 | 0.016   | -0.0463 |
| PVX_084870 | -0.8704 | -1.3693 | -1.0527 | -0.6595 | 0.0889  | 0.6212  | 0.278   | -0.3485 | -0.629  |
| PVX_082880 | -0.2038 | -0.2306 | -0.0318 | 0.2868  | 0.8083  | 0.6252  | 0.0013  | -0.3017 | -0.4182 |
| PVX_099305 | 0.6254  | 0.8859  | 0.8185  | 0.6718  | 0.4356  | -0.1648 | -0.5672 | -0.7587 | -0.7004 |
| PVX_001835 | 0.175   | 0.4064  | 0.5277  | 0.5109  | 0.5643  | 0.2716  | -0.6616 | -1.3176 | -1.3257 |
| PVX_089575 | -0.93   | -0.089  | 0.2792  | 0.4553  | 0.4586  | -0.0663 | -0.6218 | -0.7136 | -1.1407 |
| PVX_081280 | -0.1773 | 0.6395  | 0.9871  | 1.0907  | 0.6463  | 0.0113  | -0.4616 | -0.7147 | -0.6103 |
| PVX_100865 | 0.8234  | 0.7016  | 0.5877  | 0.5719  | 0.3937  | 0.4102  | 0.0378  | -0.1555 | 0.229   |
| PVX_122075 | -0.0577 | 0.5296  | 0.6457  | 0.376   | 0.2121  | 0.6679  | 0.1632  | 0.0541  | 0.0982  |
| PVX_114005 | 0.4228  | 0.5671  | 0.7042  | 0.2847  | 0.4355  | 0.6551  | 0.5376  | 0.5441  | 0.2223  |
| PVX_000530 | 0.8482  | -0.0864 | -0.3677 | -0.4255 | -0.4396 | -0.562  | 0.4743  | 0.9838  | 1.2353  |
| PVX_114590 | -0.8312 | -0.5392 | -0.2567 | 0.1269  | 0.3085  | 0.6723  | 0.1991  | -0.1932 | -0.3399 |
| PVX_101090 | 0.2467  | 0.6231  | 0.4384  | 0.4739  | 0.2489  | -0.5681 | -0.4571 | -0.6742 | -0.3947 |
| PVX_116610 | -0.6745 | 0.1278  | 0.7576  | 0.6875  | 0.394   | 0.0438  | -0.2307 | -0.2643 | -0.5032 |
| PVX_082715 | 1.0015  | 0.1574  | -0.3639 | -0.6267 | -0.6414 | -0.3481 | 0.5851  | 1.1331  | 1.1462  |
| PVX_079915 | 0.7249  | 0.3942  | 0.3162  | 0.3143  | 0.1734  | 0.4357  | 0.5121  | 0.6605  | 0.6059  |
| PVX_101445 | 0.7614  | 0.5148  | 0.3546  | -0.0058 | 0.0489  | 0.3306  | -0.0237 | 0.3031  | 0.3856  |
| PVX_001905 | -1.2188 | -0.4306 | -0.2106 | -0.0493 | -0.2426 | 0.5816  | 0.3277  | -0.65   | -0.9365 |
| PVX_094565 | -0.0796 | 0.4407  | 0.4255  | 0.1877  | -0.0773 | -0.4005 | -0.7428 | -0.4176 | 0.1257  |
| PVX_092125 | -1.0223 | -0.1092 | 0.2989  | 0.4681  | 0.5062  | 0.686   | 0.289   | -0.5375 | -0.8899 |
| PVX_117070 | -0.0346 | 0.0699  | -0.0964 | -0.2831 | -0.3828 | 0.2431  | 0.7985  | 0.6424  | 0.791   |
| PVX_123385 | 0.2954  | 0.3889  | 0.4304  | 0.478   | 0.5297  | 0.5075  | 0.4244  | -0.1954 | -0.5763 |
| PVX_119500 | 0.2051  | -0.409  | -0.3692 | 0.0363  | 0.8563  | 0.7925  | 0.4199  | 0.336   | 0.2822  |
| PVX_084520 | -0.7509 | -0.1672 | 0.0575  | 0.2797  | 0.3349  | 0.3741  | 0.2644  | -0.0922 | -0.0716 |
| PVX_086070 | -0.4502 | -0.0426 | 0.0161  | -0.4047 | -0.2117 | -0.2041 | 1.0042  | 0.792   | 0.5981  |
| PVX_122945 | -0.2354 | -0.0051 | 0.0267  | -0.0141 | -0.5704 | -0.4448 | -0.6141 | 0.1794  | 0.3109  |

|            |         |         |         |         |         |         |         |         |         |
|------------|---------|---------|---------|---------|---------|---------|---------|---------|---------|
| PVX_080170 | 0.1717  | 0.6763  | 0.586   | 0.6361  | 0.3137  | 0.1096  | -0.1799 | -0.2382 | 0.0337  |
| PVX_002620 | 1.0159  | 0.8516  | 0.6778  | 0.7267  | 0.5655  | 0.54    | -0.2225 | -0.7112 | -0.5626 |
| PVX_084985 | 1.1381  | 0.4038  | -0.1798 | -0.3607 | -0.4842 | -0.3648 | 0.3484  | 1.2289  | 1.5354  |
| PVX_084255 | -0.5109 | -0.495  | -0.524  | -0.5186 | -0.1866 | 0.1418  | 0.2302  | -0.6528 | -0.6886 |
| PVX_117560 | -0.4278 | -0.2875 | 0.14    | 0.5753  | 0.7408  | 0.461   | -0.1791 | -0.3648 | -0.338  |
| PVX_096110 | 0.2392  | 0.3679  | 0.4827  | 0.6143  | 0.6856  | 0.2351  | 0.0167  | -0.2463 | -0.0533 |
| PVX_123525 | 0.3265  | 0.2101  | 0.1681  | 0.0904  | 0.0979  | 0.2969  | 0.2169  | 0.2265  | -0.0456 |
| PVX_116765 | 0.1064  | 0.0733  | 0.1535  | -0.0549 | -0.0591 | 0.197   | -0.0129 | 0.1491  | 0.0416  |
| PVX_083120 | -1.5571 | -0.8151 | 0.6267  | 1.096   | 0.6273  | 0.4902  | -0.5772 | -0.7586 | -1.0225 |
| PVX_003590 | 0.0633  | -0.0464 | -0.2937 | -0.3137 | 0.0369  | 0.476   | 0.423   | 0.6437  | 0.9164  |
| PVX_081590 | 0.1892  | 0.4859  | 0.4301  | 0.4321  | 0.3318  | 0.3     | -0.2109 | -0.2624 | -0.2461 |
| PVX_092475 | 0.1134  | -0.1749 | -0.1258 | -0.0364 | 0.2352  | 0.2024  | -0.0103 | 0.1498  | -0.1571 |
| PVX_097730 | 0.3315  | 0.0686  | -0.1002 | -0.1956 | -0.8121 | -0.4792 | -0.8601 | 0.0855  | 0.4313  |
| PVX_114290 | -0.582  | -1.0651 | -0.5848 | 0.1797  | 0.8007  | 0.4079  | -0.0067 | -0.1428 | -0.4834 |
| PVX_119620 | 0.6394  | 0.4346  | 0.4397  | 0.3146  | 0.0594  | 0.2088  | -0.0997 | 0.0758  | -0.0629 |
| PVX_095240 | 0.7633  | 0.4054  | 0.1075  | -0.1162 | -0.0122 | 0.0806  | -0.2191 | 0.2937  | 0.7444  |
| PVX_092115 | 0.2419  | 0.3287  | 0.3488  | 0.2587  | 0.0486  | 0.1337  | -0.4473 | -1.3741 | -1.5533 |
| PVX_097805 | 0.0845  | 0.0805  | -0.0133 | -0.2726 | 0.0253  | 0.0137  | -0.2818 | -0.5381 | -0.0197 |
| PVX_080695 | 0.9129  | -0.2117 | -0.3497 | -0.7228 | -0.942  | -0.5862 | 0.3478  | 1.1162  | 1.2541  |
| PVX_122715 | 0.7811  | 0.3613  | 0.2815  | 0.1151  | 0.0971  | 0.1233  | -0.0798 | -0.4802 | -0.6115 |
| PVX_002815 | 0.2641  | -0.0024 | 0.0232  | -0.1622 | -0.5564 | -0.9707 | -1.0339 | -0.8243 | -0.6272 |
| PVX_084850 | -0.4201 | 0.255   | 0.4208  | 0.6423  | 0.8584  | 0.7368  | -0.3981 | -1.3075 | -1.424  |
| PVX_089530 | -1.1456 | -1.3592 | -1.4396 | -1.3065 | -1.1136 | -1.0462 | 1.5547  | 1.4791  | 0.4198  |
| PVX_116840 | -0.593  | -0.0278 | 0.3482  | 0.4304  | 0.742   | 0.083   | -0.4249 | -0.7016 | -0.5031 |
| PVX_087740 | 0.1837  | 0.5274  | 0.7921  | 0.766   | 0.4473  | -0.0667 | -0.0327 | 0.0056  | 0.1866  |
| PVX_084165 | -0.6681 | -0.7677 | 0.2851  | 0.8567  | 0.6809  | 0.2129  | -0.3564 | -0.4969 | -0.3143 |
| PVX_117975 | 0.1955  | 0.2539  | 0.4109  | 0.2906  | -0.0299 | -0.517  | -0.568  | -0.4809 | 0.0484  |
| PVX_088225 | 0.0384  | 0.0221  | -0.0531 | -0.3952 | -0.2527 | -0.5659 | -0.474  | 0.9098  | 1.1387  |
| PVX_080130 | -0.6116 | -0.8861 | -1.076  | -1.25   | -0.9313 | 0.1897  | 1.0385  | 0.9153  | 0.3578  |
| PVX_081320 | -0.2718 | -0.1539 | -0.3778 | -0.4496 | 0.5956  | 0.5953  | 0.3097  | 0.2603  | 0.106   |
| PVX_085825 | 0.6045  | 0.6496  | 0.625   | 0.2951  | 0.3101  | 0.3251  | -0.1404 | -0.4199 | -0.5187 |
| PVX_081220 | -0.1379 | -0.0415 | -0.0323 | -0.0214 | 0.0547  | -0.3436 | -0.5891 | -0.4441 | -0.6867 |
| PVX_091050 | -0.085  | 0.6605  | 0.8478  | 0.7238  | 0.3746  | -0.6122 | -0.9913 | -0.9748 | -0.7897 |
| PVX_079940 | -0.46   | 0.5474  | 0.6776  | 0.5478  | 0.2429  | -0.1586 | -0.5512 | -0.4752 | -0.0507 |
| PVX_118275 | 0.1514  | 0.4699  | 0.4208  | 0.2799  | 0.2586  | 0.1441  | -0.4267 | -1.058  | -0.8041 |
| PVX_080215 | 1.2223  | 0.4237  | 0.2326  | -0.1205 | -1.0269 | -1.3391 | -0.6161 | 0.3508  | 0.229   |
| PVX_093500 | -2.3442 | -2.378  | -2.6793 | -2.5064 | -2.7749 | -2.5372 | -1.891  | 1.1791  | 1.5474  |
| PVX_082785 | 0.0198  | 0.0967  | 0.097   | 0.2253  | 0.12    | -0.4945 | -0.6928 | -0.5082 | -0.336  |
| PVX_118260 | 1.2598  | 0.5021  | 0.6439  | 0.5251  | 0.5281  | 0.5062  | 0.2763  | 0.1164  | -0.114  |
| PVX_081510 | -0.0895 | -0.5986 | 0.0822  | 0.76    | 0.8733  | 0.876   | 0.2822  | -0.5869 | -0.8089 |
| PVX_080190 | 0.2012  | -0.165  | -0.2316 | 0.2264  | 0.3187  | 0.2227  | 0.5445  | 0.3739  | 0.2058  |
| PVX_085105 | -0.2538 | 0.0006  | 0.1104  | 0.5344  | 0.7109  | 0.731   | 0.2923  | -0.2195 | -0.4255 |
| PVX_003845 | -0.1709 | -0.1493 | -0.1536 | -0.2568 | -0.4908 | 0.8028  | 0.6275  | 0.0999  | -0.4933 |
| PVX_001725 | -1.9588 | -1.9765 | -2.2169 | -2.2224 | -2.1429 | -2.028  | 1.2278  | 0.8764  | -0.2641 |
| PVX_085440 | 0.7101  | 0.3268  | -0.2937 | -0.5676 | -0.7187 | -0.4574 | 0.4624  | 1.0316  | 1.192   |
| PVX_083215 | 1.0669  | 0.7632  | 0.012   | -0.2888 | -0.7093 | -0.8913 | -1.0191 | -0.7387 | -0.8966 |
| PVX_123725 | -0.9425 | -0.7038 | -0.4394 | -0.2778 | -0.1085 | 0.1809  | -0.0033 | -0.2472 | -0.2869 |
| PVX_082990 | 0.5935  | 0.4597  | 0.2953  | -0.3735 | -0.6773 | -0.3652 | 0.0008  | 0.5472  | 0.9967  |
| PVX_087085 | -0.9749 | -0.2644 | 0.6314  | 0.8933  | 0.7674  | 0.427   | 0.3927  | -0.0712 | -0.637  |
| PVX_098950 | 0.2322  | 0.0206  | 0.0341  | -0.0402 | -0.1072 | 0.5265  | 0.2997  | 0.2244  | 0.3153  |
| PVX_092205 | -0.015  | 0.1374  | 0.1235  | 0.0976  | 0.0789  | 0.5483  | 0.59    | 0.2773  | 0.0133  |
| PVX_084735 | 0.3715  | 0.3418  | 0.1523  | 0.0585  | -0.2614 | -0.0101 | 0.1132  | -0.0772 | -0.1004 |
| PVX_099490 | 0.1578  | -0.0585 | -0.1307 | -0.3177 | -0.1484 | 0.206   | 0.0683  | -0.1491 | -0.1471 |
| PVX_113350 | -1.0431 | -0.8845 | 0.4581  | 1.1246  | 0.9559  | 0.1266  | -0.2861 | -0.8457 | -1.0404 |
| PVX_091465 | 0.3168  | 0.8907  | 0.8205  | 0.5122  | -0.246  | -0.8125 | -1.0814 | 0.4142  | 0.3865  |
| PVX_000615 | 0.8049  | 0.6799  | 0.5739  | 0.3982  | 0.2479  | -0.1689 | -0.442  | -0.1626 | -0.1487 |
| PVX_080180 | 0.2659  | 0.0846  | 0.2143  | 0.6166  | 0.7637  | 0.1738  | -0.2111 | -0.3076 | -0.2255 |
| PVX_101500 | -0.4362 | -0.177  | -0.1198 | -0.3025 | -0.3126 | -0.2263 | -0.0353 | 0.3381  | 0.4634  |
| PVX_003925 | -0.3117 | 0.1851  | 0.5246  | 0.4555  | 0.1064  | -0.2653 | -0.5219 | -0.5332 | -0.6947 |
| PVX_091060 | 0.7743  | 0.4614  | 0.4356  | 0.1988  | 0.0532  | -0.0529 | -0.7602 | -0.8622 | -0.5552 |
| PVX_094350 | -0.4089 | -0.4953 | -1.0419 | -1.0908 | -0.3919 | 0.1665  | 0.979   | 0.4569  | 0.3941  |
| PVX_085485 | 0.2111  | 0.1301  | 0.0825  | 0.106   | 0.048   | 0.2577  | -0.07   | -0.3021 | -0.7272 |
| PVX_092065 | 0.0611  | 0.6886  | 0.7641  | 0.8192  | 0.8718  | -0.9284 | -1.2833 | -1.0094 | -0.5563 |

|            |         |         |         |         |         |         |         |         |         |
|------------|---------|---------|---------|---------|---------|---------|---------|---------|---------|
| PVX_113705 | -0.6305 | -0.7773 | -0.3601 | 0.3021  | 0.9357  | 0.4554  | -0.3683 | -0.3974 | -0.5741 |
| PVX_119740 | 0.1844  | 0.3915  | 0.2458  | 0.1345  | -0.0223 | -0.1378 | -0.6022 | -1.1101 | -1.0147 |
| PVX_118230 | 0.6905  | 0.393   | 0.2516  | 0.301   | 0.2664  | 0.1602  | -0.1284 | -0.6457 | -0.3205 |
| PVX_101155 | -0.0588 | 0.1952  | 0.4649  | 0.6998  | 0.3708  | 0.0556  | -0.1523 | -0.3037 | -0.1734 |
| PVX_124025 | -0.2649 | 0.3409  | 0.3445  | 0.3384  | 0.1561  | -0.1869 | 0.7314  | 0.1344  | -0.5766 |
| PVX_117470 | 0.2064  | 0.0905  | -0.0602 | -0.1004 | -0.1369 | -0.0609 | 0.0182  | -0.4911 | 0.0111  |
| PVX_098640 | 0.413   | 0.5589  | 0.6209  | 0.4669  | 0.2413  | 0.1405  | -0.4377 | -1.1825 | -1.2383 |
| PVX_091735 | 0.3019  | -0.1474 | -0.3263 | -0.2165 | -0.4515 | 0.4166  | 0.7532  | -0.0041 | -0.2663 |
| PVX_084885 | -0.2197 | 0.1032  | 0.2951  | 0.6269  | 0.8646  | -0.0285 | -0.1496 | -0.253  | -0.292  |
| PVX_085000 | 0.815   | -0.3346 | -0.9749 | -1.3263 | -1.0875 | 0.3593  | 0.5177  | 1.1713  | 1.3107  |
| PVX_122575 | 0.1398  | 0.114   | -0.0481 | -0.0592 | 0.1723  | -0.3362 | -0.1402 | 0.6732  | 0.6871  |
| PVX_095045 | -0.2015 | -0.1242 | 0.0316  | 0.0457  | 0.1172  | -0.0074 | -0.4202 | -0.9027 | -0.8505 |
| PVX_019665 | -0.2842 | 0.0018  | 0.6158  | 0.5205  | 0.3597  | 0.0448  | -0.0801 | 0.2233  | -0.0023 |
| PVX_122600 | 0.5996  | 0.6542  | 0.1918  | -0.3149 | -0.4141 | -0.4781 | 0.4955  | 0.2981  | 0.4851  |
| PVX_123275 | -0.9809 | -1.009  | -1.1009 | -1.0475 | -1.1356 | -1.4286 | -0.2436 | 1.1531  | 0.6595  |
| PVX_001745 | -0.6198 | -0.525  | -0.424  | -0.5961 | -0.5725 | -0.7071 | -0.3576 | 1.0213  | 0.9809  |
| PVX_100550 | -1.0303 | 0.1666  | 0.7371  | 0.975   | 0.8104  | -0.0788 | -0.9201 | -1.2818 | -1.1042 |
| PVX_119810 | -1.454  | -0.6283 | -0.0049 | 0.5545  | 0.6422  | 0.1442  | -0.5851 | -0.8152 | -0.9244 |
| PVX_122185 | 0.0838  | 0.518   | 0.6066  | 0.6375  | 0.5436  | -0.0788 | -0.593  | -0.7488 | -0.863  |
| PVX_093515 | -0.411  | -0.2538 | -0.2829 | -0.283  | -0.1324 | 0.7511  | 1.0649  | 0.7255  | 0.3311  |
| PVX_101265 | -0.0238 | -0.0508 | 0.01    | -0.1914 | 0.1141  | 0.1355  | 0.8782  | 0.9519  | 0.5432  |
| PVX_092225 | -0.403  | 0.0809  | 0.4277  | 0.7663  | 0.6943  | 0.7045  | 0.4868  | 0.1461  | 0.2022  |
| PVX_117965 | 0.1398  | 0.0087  | 0.0826  | 0.2041  | 0.3239  | 0.2458  | -0.138  | -0.4936 | -0.5145 |
| PVX_083455 | -0.4387 | -0.0349 | -0.0159 | 0.0935  | 0.0988  | 0.8734  | -0.1353 | -0.3882 | 0.0559  |
| PVX_118465 | 0.8268  | 0.3367  | -0.0622 | -0.0908 | -0.2065 | -0.2996 | 0.1147  | 0.7359  | 1.1969  |
| PVX_099675 | 0.4492  | 0.5512  | 0.6467  | 0.4388  | 0.4769  | 0.5794  | 0.3621  | 0.0096  | 0.1406  |
| PVX_124005 | 0.045   | -0.5323 | -0.1857 | 0.1052  | 0.2933  | 0.5099  | 0.3189  | 0.3924  | 0.3875  |
| PVX_096180 | 0.2145  | 0.1381  | 0.1656  | 0.0367  | 0.1555  | 0.126   | 0.0023  | 0.0881  | -0.1748 |
| PVX_088030 | 0.007   | -0.1551 | -0.4646 | -0.5642 | 0.3418  | 0.491   | 0.4741  | 0.5871  | 0.5223  |
| PVX_000875 | -0.509  | 0.6695  | 0.9064  | 1.014   | 0.4613  | 0.2615  | -0.4491 | -0.4425 | -0.3621 |
| PVX_112720 | -0.2803 | -0.1148 | -0.448  | -0.7134 | -0.9155 | -1.4909 | -1.2454 | -0.88   | -0.969  |
| PVX_092735 | 0.2574  | 0.5643  | 0.579   | 0.2141  | 0.0316  | 0.2493  | -0.3125 | -0.8341 | -0.7373 |
| PVX_088280 | -0.4301 | -0.0662 | 0.706   | 0.8402  | 0.4712  | -0.4681 | -0.6403 | -0.2802 | 0.0266  |
| PVX_121960 | 0.6855  | 0.4365  | 0.119   | -0.2989 | -0.4243 | -0.6284 | -0.2024 | 0.5194  | 1.2896  |
| PVX_001965 | -0.197  | -0.256  | -0.1068 | 0.1121  | 0.2476  | -0.2808 | -0.4037 | -0.2321 | -0.1901 |
| PVX_088975 | -0.7791 | -0.2425 | 0.4339  | 0.6167  | 0.4759  | 0.1278  | -0.4104 | -0.4548 | -0.4751 |
| PVX_097965 | -0.0383 | -0.4306 | -0.2005 | -0.1569 | 0.4604  | 1.153   | 1.2449  | 0.5227  | -0.0773 |
| PVX_083130 | -0.0846 | -0.0347 | 0.0155  | 0.0197  | 0.0024  | 0.272   | -0.1116 | -0.1483 | -0.3621 |
| PVX_118115 | 0.5935  | 0.1098  | -0.1034 | -0.5892 | -0.9565 | -0.6447 | -0.2257 | 0.2334  | 1.2106  |
| PVX_002890 | -0.7233 | -0.3288 | 0.2375  | 0.3449  | 0.257   | 0.3534  | -0.0723 | -0.4668 | -0.636  |
| PVX_123715 | -0.7508 | -0.7879 | -0.2391 | 0.4002  | 0.8182  | 0.7301  | -0.0906 | -0.16   | -0.1573 |
| PVX_122720 | 0.2291  | -0.3383 | -0.991  | -1.2296 | -1.2402 | -0.9414 | 1.0445  | 1.0765  | 0.8156  |
| PVX_085470 | -0.0513 | 0.1183  | 0.0248  | 0.117   | 0.1789  | 0.5662  | 0.7143  | 0.3365  | -0.1198 |
| PVX_089905 | -1.0261 | -0.7268 | -0.6172 | -0.4255 | 0.0086  | 1.053   | 1.0259  | 0.1049  | -0.3178 |
| PVX_123325 | 0.3884  | 0.2731  | 0.2198  | 0.1572  | 0.4381  | 0.1445  | -0.2452 | -0.2739 | 0.0612  |
| PVX_003655 | 0.5928  | 0.469   | 0.1025  | -0.0727 | -0.1828 | 0.311   | 1.0756  | 0.9665  | 0.7035  |
| PVX_083175 | -1.3179 | -0.3044 | 0.0872  | 0.2714  | 0.7503  | 0.5091  | -0.5125 | -1.0379 | -1.1194 |
| PVX_097630 | 0.6607  | -0.102  | -0.2837 | -0.2501 | -0.3794 | -0.3391 | 0.1411  | 0.547   | 0.7716  |
| PVX_111150 | 0.2727  | 0.4892  | 0.5462  | 0.4821  | 0.2396  | 0.2938  | 0.5223  | 0.3786  | -0.2062 |
| PVX_113585 | -0.7768 | -0.2623 | 0.2372  | 0.4684  | 0.476   | 0.7681  | -0.228  | -0.4428 | -0.1312 |
| PVX_101555 | 0.1305  | -0.049  | -0.0052 | -0.1834 | -0.377  | -0.1859 | 0.0125  | -0.0397 | 0.1672  |
| PVX_092265 | -0.7624 | -0.8504 | -1.1431 | -1.2674 | 0.1934  | 0.8477  | 0.261   | -0.4218 | -0.7579 |
| PVX_079765 | -0.0553 | 0.4726  | 0.8351  | 0.7085  | 0.3041  | -0.1709 | -0.1605 | 0.0866  | 0.2322  |
| PVX_002900 | 0.3907  | 0.3211  | 0.1719  | 0.4355  | 0.054   | 0.0847  | -0.0697 | 0.5911  | 0.4271  |
| PVX_122265 | -0.352  | -0.4071 | -0.3822 | -0.1321 | 0.3426  | 0.6453  | 0.6509  | 0.5711  | 0.3118  |
| PVX_119745 | -0.4768 | 0.3576  | 0.4607  | 0.3763  | 0.3461  | 0.0442  | -0.5564 | -0.8654 | -0.9598 |
| PVX_089085 | 0.7369  | 0.4791  | 0.4491  | 0.2921  | 0.3603  | 0.3833  | 0.1925  | -0.1925 | -0.0987 |
| PVX_116940 | -0.1147 | 0.4442  | 0.6559  | 0.701   | 0.4449  | -0.4753 | -0.6776 | -0.3288 | -0.1924 |
| PVX_113410 | 0.1204  | -0.005  | -0.0522 | 0.0271  | -0.3032 | -0.2651 | -0.135  | 0.4185  | -0.2294 |
| PVX_087145 | 0.1218  | 0.0045  | 0.1015  | -0.038  | 0.0435  | -0.0596 | 0.3257  | 0.499   | 0.1281  |
| PVX_122785 | -0.2615 | -0.8709 | -1.1664 | -0.7809 | 0.3627  | 0.7999  | 0.2692  | -0.0266 | 0.2935  |
| PVX_122765 | 0.6043  | 0.31    | 0.4044  | 0.4004  | -0.1685 | -0.2445 | 0.2027  | 0.6069  | 0.7113  |
| PVX_114810 | -0.1789 | -0.2824 | -0.4165 | -0.582  | -0.4992 | 0.291   | 0.6752  | 0.1048  | 0.1961  |

|            |         |         |         |         |         |         |         |         |         |
|------------|---------|---------|---------|---------|---------|---------|---------|---------|---------|
| PVX_087090 | -0.6123 | -0.1644 | -0.1072 | -0.2918 | -0.4032 | -0.597  | -0.801  | -0.9228 | -1.2545 |
| PVX_002680 | -0.1374 | -0.1704 | -0.1603 | -0.0267 | 0.0538  | -0.6519 | -0.6602 | -0.3695 | -0.2718 |
| PVX_002595 | -0.7005 | -0.7464 | -0.5514 | -0.2151 | -0.1002 | 0.4311  | 0.0544  | -0.3942 | -0.4951 |
| PVX_082665 | -0.8057 | -0.662  | -1.0026 | -1.0864 | -1.257  | -1.3125 | 0.6633  | 1.1332  | 0.559   |
| PVX_083475 | -1.4256 | -1.3891 | -1.3732 | -0.8759 | -1.037  | -1.2289 | 0.4424  | 1.6575  | 1.3224  |
| PVX_117880 | -1.5902 | -1.7745 | -1.881  | -1.9154 | -1.9075 | -1.7609 | 1.2524  | 1.2445  | 0.1033  |
| PVX_003905 | 0.6522  | -0.1792 | -0.6621 | -0.6811 | -0.6237 | -0.5908 | 0.1084  | 0.7337  | 1.0386  |
| PVX_117980 | 0.4434  | 0.4097  | 0.0086  | 0.2094  | -0.0309 | 0.2776  | 0.3311  | -0.2346 | -0.3472 |
| PVX_101340 | -0.0875 | 0.305   | 0.8183  | 0.3381  | 0.3292  | 0.2596  | -0.0013 | -0.0811 | 0.0034  |
| PVX_090870 | 0.2257  | 0.5992  | 0.4496  | 0.5367  | 0.3407  | -0.477  | -0.8569 | -0.5867 | -0.392  |
| PVX_003975 | -0.2519 | 0.0508  | 0.5576  | 0.7284  | 0.6956  | 0.2146  | 0.1484  | 0.4431  | 0.2957  |
| PVX_123085 | -0.1739 | -0.0266 | -0.0463 | 0.0558  | 0.0256  | -0.3638 | 0.0191  | 0.284   | -0.1197 |
| PVX_082755 | -0.8238 | -0.5196 | -0.0449 | 0.2465  | 0.5546  | 0.5344  | 0.0023  | -0.3362 | -0.2966 |
| PVX_094490 | -1.0682 | -0.8697 | -0.0518 | 0.342   | 0.4156  | 0.4507  | -0.0588 | -0.8822 | -0.7798 |
| PVX_095330 | 0.5598  | 0.3992  | 0.1131  | -0.4394 | -0.5734 | -0.781  | -0.4353 | 0.3905  | 1.1089  |
| PVX_114265 | -0.9325 | -0.8641 | -0.9326 | -0.3597 | 0.5991  | 0.9805  | 0.6507  | 0.2848  | -0.2405 |
| PVX_091760 | 0.8221  | -0.1934 | -0.6357 | -0.6501 | -0.6439 | -0.4881 | 0.7154  | 1.1653  | 1.225   |
| PVX_002950 | 0.2814  | 0.2693  | 0.339   | 0.2949  | 0.564   | 0.5179  | 0.18    | 0.203   | -0.0989 |
| PVX_115370 | -0.5159 | -0.1877 | -0.2953 | -0.4209 | -0.7549 | -0.5838 | 0.0485  | -0.7227 | -1.0587 |
| PVX_114040 | -0.0739 | 0.1528  | 0.2112  | 0.2136  | 0.1215  | 0.0264  | -0.6314 | -1.279  | -1.4118 |
| PVX_084435 | 0.0227  | 0.0424  | 0.4647  | 0.6218  | 0.7678  | 0.7401  | 0.3353  | 0.021   | 0.017   |
| PVX_098710 | 0.8575  | -0.1465 | -0.5539 | -0.9801 | -1.1434 | -0.6514 | 0.499   | 0.8873  | 1.1309  |
| PVX_119705 | -0.3041 | -0.1793 | 0.1977  | 0.2516  | 0.4948  | 0.8035  | 0.0743  | -0.2794 | -0.4664 |
| PVX_000610 | -1.2492 | -0.4817 | -0.0455 | 0.3649  | 0.7651  | 1.2037  | -0.2091 | -0.8924 | -1.0558 |
| PVX_111385 | -0.3512 | -0.9562 | -0.7863 | -0.2728 | 0.3682  | 0.3847  | 0.2255  | -1.0985 | -1.2511 |
| PVX_122730 | -0.3016 | -0.4655 | -0.3041 | -0.1223 | 0.5054  | 0.6754  | 0.0092  | 0.0372  | -0.1302 |
| PVX_088835 | 0.1476  | 0.1863  | -0.044  | -0.5121 | -0.8319 | -0.6951 | -0.3213 | 0.4044  | 0.7668  |
| PVX_100955 | 0.0447  | 0.4589  | 0.5639  | 0.4062  | 0.5518  | 0.46    | 0.159   | 0.1475  | 0.1422  |
| PVX_088875 | -0.0159 | -0.0691 | -0.2426 | -0.6332 | -0.6281 | -0.219  | 0.6388  | 0.792   | 0.8983  |
| PVX_116980 | -0.4783 | 0.0913  | 0.5109  | 0.7533  | 0.5934  | 0.5632  | 0.1076  | -0.0331 | -0.2534 |
| PVX_098915 | 0.0531  | 0.1378  | -0.1793 | -0.3989 | -0.7395 | -0.5035 | -0.474  | -0.2769 | 0.318   |
| PVX_090955 | -0.1061 | -0.5461 | -0.8239 | -1.0702 | -0.2854 | 0.7926  | 0.5632  | 0.179   | 0.2035  |
| PVX_113805 | -0.9739 | -0.7795 | -0.1821 | -0.0344 | 0.2615  | 0.5117  | 0.2096  | -0.4032 | -0.4999 |
| PVX_082530 | -0.2791 | 0.2892  | 0.3135  | 0.2595  | 0.3411  | 0.3707  | 0.146   | -0.038  | -0.2223 |
| PVX_097025 | 0.0445  | 0.4032  | 0.6424  | 0.6235  | 0.0698  | -0.487  | -0.6433 | -0.6497 | -0.2271 |
| PVX_087725 | -0.9719 | -0.6682 | -1.031  | -1.7569 | -2.2885 | -2.1951 | -1.5423 | 0.9662  | 1.4239  |
| PVX_101510 | 0.4455  | 0.2872  | 0.1873  | -0.147  | -0.1864 | -0.1432 | -0.0483 | 0.307   | 0.1422  |
| PVX_084105 | 0.5083  | -0.0335 | -0.5631 | -1.029  | -1.2652 | -1.5733 | -0.6139 | 0.3828  | 1.3862  |
| PVX_098990 | 0.4963  | 0.2439  | -0.295  | -0.636  | -0.4866 | 0.0955  | 0.1651  | 0.7429  | 1.4736  |
| PVX_095085 | 0.5222  | 0.0359  | -0.187  | -0.5927 | -0.61   | -0.4731 | -0.1959 | 0.7237  | 1.1633  |
| PVX_094890 | 0.8936  | 0.2033  | 0.1424  | -0.1066 | -0.0994 | 0.3595  | 0.37    | 0.9611  | 1.1277  |
| PVX_114135 | 1.208   | 0.6547  | 0.2268  | -0.1677 | 0.0164  | -0.1434 | 0.4525  | 0.7731  | 0.5822  |
| PVX_097615 | 0.2883  | 0.4259  | 0.4645  | 0.486   | 0.3457  | 0.1163  | -0.0008 | 0.4118  | 0.5907  |
| PVX_092410 | -1.403  | -0.4976 | -0.1228 | -0.0286 | 0.0679  | 0.7781  | 0.0933  | -1.0483 | -1.2829 |
| PVX_123845 | 0.1494  | -0.0893 | -0.0918 | -0.2038 | 0.2224  | -0.0683 | -0.0893 | -0.319  | -0.3026 |
| PVX_119570 | 0.0315  | -0.2693 | -0.7203 | -0.9655 | -0.8087 | -0.6312 | -0.1766 | 0.2154  | 0.205   |
| PVX_084680 | -1.6665 | -1.6403 | -1.7661 | -1.7852 | -1.9102 | -1.3811 | 1.3507  | 1.1041  | 0.142   |
| PVX_113920 | -0.4228 | -0.0451 | 0.1526  | 0.0772  | 0.0164  | 0.0983  | 0.291   | 0.1446  | -0.1894 |
| PVX_085430 | -0.4714 | 0.1286  | 0.1137  | 0.1812  | 0.3165  | -0.1319 | -0.1653 | 0.0744  | 0.0574  |
| PVX_081610 | 0.0223  | 0.6328  | 0.8504  | 0.7988  | 0.8238  | 0.9014  | -0.1683 | -1.1539 | -1.1003 |
| PVX_122000 | 0.0915  | -0.1782 | 0.103   | 0.2367  | 0.2262  | 0.1321  | -0.1412 | -0.5108 | -0.3502 |
| PVX_098785 | -0.2654 | -0.1162 | 0.4824  | 0.6384  | 0.4733  | -0.1738 | -0.415  | -0.358  | -0.3014 |
| PVX_099485 | -0.3454 | -0.3169 | -0.1622 | -0.0499 | 0.0974  | 0.1073  | -0.2914 | -0.5162 | -0.6428 |
| PVX_118355 | 0.1062  | -0.3971 | -0.8183 | -1.1431 | -0.825  | 0.283   | 0.6665  | 0.4094  | 0.4485  |
| PVX_085575 | 0.6766  | 0.706   | 0.7348  | 0.4006  | -0.0177 | -0.5151 | -0.5864 | -0.2371 | 0.2703  |
| PVX_090880 | 0.3691  | 0.3633  | 0.5849  | 0.583   | 0.7393  | 0.6292  | -0.1431 | -0.9697 | -1.0051 |
| PVX_002500 | -1.1153 | -0.7603 | -0.8211 | -0.869  | -0.6078 | -0.2611 | 0.3592  | 0.8055  | -0.241  |
| PVX_101260 | 0.2153  | 0.4957  | 0.3166  | 0.4024  | 0.2997  | -0.1601 | -0.799  | -0.9331 | -0.7985 |
| PVX_098985 | 0.0738  | -0.5628 | -0.3709 | -0.1644 | -0.2267 | 0.4564  | 0.0406  | 0.1538  | 0.203   |
| PVX_099420 | -0.1966 | 0.5508  | 0.3518  | 0.3742  | 0.5595  | 0.4728  | -0.0239 | -0.4209 | -0.6358 |
| PVX_000620 | 0.8476  | 0.6363  | 0.6176  | 0.6673  | 0.6264  | -0.0475 | -1.072  | -0.8458 | -0.2454 |
| PVX_085300 | 0.7012  | 0.3304  | 0.2758  | -0.1608 | -0.5477 | -0.8922 | -0.4337 | 0.2068  | 0.8702  |
| PVX_002580 | -1.0048 | -0.3438 | 0.3038  | 0.5524  | 0.5544  | -0.2994 | -0.9491 | -1.0183 | -0.6673 |

|            |         |         |         |         |         |         |         |         |         |
|------------|---------|---------|---------|---------|---------|---------|---------|---------|---------|
| PVX_118285 | 1.026   | 0.1693  | -0.299  | -0.4848 | -0.6412 | -0.5153 | 0.0666  | 1.1618  | 1.4901  |
| PVX_123695 | -0.0943 | -0.1997 | -0.5546 | -0.641  | -0.938  | -0.0481 | 0.6616  | 0.6712  | 0.1149  |
| PVX_116815 | 0.1197  | -0.6411 | -0.7162 | -0.8057 | -0.4977 | -0.1767 | 0.3259  | 0.5952  | 0.3628  |
| PVX_085585 | -0.0875 | -0.1192 | -0.4085 | -0.6684 | -0.775  | -0.4971 | 0.1545  | 0.08    | -0.1303 |
| PVX_113490 | 0.7461  | 0.1292  | -0.2064 | -0.6147 | -0.7705 | -0.4866 | -0.2657 | 0.6     | 1.3395  |
| PVX_118340 | -0.1128 | -0.36   | -0.3746 | 0.0286  | -0.267  | -0.2291 | -0.0014 | 0.3901  | 0.4497  |
| PVX_085740 | 0.0054  | -0.3664 | -0.5916 | -0.7469 | -0.7322 | -0.2862 | 0.5251  | 0.2261  | -0.0405 |
| PVX_085135 | 0.0778  | 0.1344  | 0.1967  | 0.0656  | -0.0469 | 0.1551  | 0.6979  | 0.7304  | 0.5062  |
| PVX_091755 | -2.042  | -2.0102 | -2.3873 | -2.3985 | -2.2011 | 0.5229  | 1.3557  | 0.659   | -0.3106 |
| PVX_001845 | -0.6734 | -0.7249 | -0.4075 | -0.0727 | 0.1106  | 0.5361  | 0.3833  | 0.0309  | -0.3979 |
| PVX_119425 | 0.1963  | -0.2547 | -0.4012 | -0.3981 | -0.3531 | 0.2567  | 0.215   | -0.1471 | -0.1015 |
| PVX_119345 | -0.1335 | 0.0981  | 0.1781  | 0.1172  | 0.0875  | -0.0825 | -0.7488 | -1.3604 | -1.6319 |
| PVX_084745 | 0.04    | 0.3544  | 0.4502  | 0.6262  | 0.4933  | 0.3283  | -0.0874 | -0.0648 | 0.0513  |
| PVX_000915 | -0.5045 | -0.5377 | -0.1862 | 0.0724  | 0.4337  | 0.5317  | -0.2444 | -0.2365 | 0.0617  |
| PVX_087840 | -0.28   | -0.2418 | -0.3298 | 0.0005  | -0.0547 | -0.1574 | -0.9814 | -1.0208 | -1.0693 |
| PVX_118070 | -0.4795 | -0.3261 | -0.2637 | -0.2653 | -0.3504 | 0.5256  | 0.8212  | 0.4458  | 0.1844  |
| PVX_115280 | 0.1897  | -0.2161 | 0.2023  | 0.8185  | 0.5495  | -0.0463 | -0.4342 | -1.0017 | -1.0191 |
| PVX_114340 | -0.0215 | -0.1912 | -0.2485 | -0.1392 | 0.339   | 0.4459  | 0.396   | 0.1013  | -0.0081 |
| PVX_085215 | 0.7064  | 0.8145  | 0.8633  | 0.9166  | 0.6841  | 0.6604  | -0.1239 | -0.3156 | -0.2514 |
| PVX_099505 | -0.0223 | 0.1488  | 0.6632  | 0.5461  | 0.3132  | 0.3997  | -0.1696 | -0.557  | -0.6343 |
| PVX_092020 | 0.0786  | -0.0563 | -0.1595 | 0.2153  | 0.0333  | 0.3447  | 0.1964  | 0.1274  | 0.0204  |
| PVX_085140 | 0.0076  | -0.0813 | -0.6236 | -0.5412 | -0.0392 | 0.2746  | 0.2796  | 0.3113  | 0.4383  |
| PVX_114095 | -1.6391 | -0.7596 | 0.2828  | 0.7798  | 0.7439  | 0.9041  | 0.0679  | -0.5849 | -0.9686 |
| PVX_001960 | 0.1739  | 0.0233  | -0.011  | 0.5145  | 0.6196  | 1.0603  | 1.3155  | 0.7537  | 0.3427  |
| PVX_087935 | 0.8642  | 0.6687  | 0.5887  | 0.4965  | 0.2038  | -0.3057 | -0.663  | -0.6505 | -0.3892 |
| PVX_089635 | -0.8762 | -0.3149 | 0.2473  | 0.3992  | 0.3107  | 0.2229  | -0.0981 | -0.4091 | -0.4833 |
| PVX_084830 | -0.3597 | 0.3182  | 0.4754  | 0.513   | 0.4781  | 0.6002  | -0.1206 | -0.3984 | -0.0714 |
| PVX_091280 | 0.2706  | -0.2715 | -0.3967 | -0.0641 | 0.4959  | 0.8212  | 0.1528  | 0.2706  | 0.4583  |
| PVX_118025 | 0.1958  | 0.0914  | -0.0951 | -0.4031 | -0.3945 | -0.354  | -0.7727 | 0.6851  | 1.1753  |
| PVX_085875 | -0.0691 | -0.4544 | 0.0466  | 0.5276  | 0.7245  | 0.6326  | 0.1025  | 0.0488  | 0.0572  |
| PVX_095210 | -0.6866 | -0.3046 | 0.5726  | 0.6637  | 0.2108  | -0.5323 | -0.5359 | 0.0843  | 0.0513  |
| PVX_093595 | 0.3651  | 0.4142  | 0.3055  | 0.2018  | 0.0679  | -0.051  | 0.036   | 0.159   | 0.2221  |
| PVX_114825 | 0.5714  | -0.1074 | -0.5571 | -0.7419 | -0.0526 | 0.7727  | 0.633   | 0.5891  | 0.7586  |
| PVX_085415 | 0.6862  | 0.1426  | -0.1329 | -0.2509 | -0.3692 | -0.2867 | 0.0352  | 0.8898  | 0.8786  |
| PVX_005565 | 0.2145  | -0.2807 | -0.494  | -0.4722 | -0.7409 | 0.0335  | -0.1699 | 0.2158  | 0.4067  |
| PVX_115010 | 1.3212  | 1.2121  | 1.0566  | 0.8151  | -0.1612 | -1.0078 | -0.9175 | -1.0532 | -0.8878 |
| PVX_113895 | 0.2355  | 0.1653  | -0.1402 | -0.5384 | -0.4061 | -0.0571 | 0.2964  | 0.6586  | 0.79    |
| PVX_081495 | 0.1007  | 0.1723  | 0.1281  | 0.2889  | 0.2009  | -0.0473 | 0.2211  | 0.3175  | 0.0967  |
| PVX_122425 | -0.374  | -0.4076 | 0.0881  | 0.5599  | 0.6824  | 0.3969  | -1.0084 | -0.6524 | -0.6141 |
| PVX_091160 | 0.5452  | 0.4408  | 0.4974  | 0.338   | 0.3867  | 0.2477  | 0.1118  | 0.7924  | 0.5731  |
| PVX_002770 | 0.2459  | 0.3864  | 0.2525  | 0.3112  | 0.0798  | 0.0901  | -0.1082 | -0.1894 | -0.1638 |
| PVX_122235 | -0.219  | -0.5402 | -0.5984 | -0.3696 | -0.0045 | 0.2106  | -0.1136 | -0.1013 | -0.0659 |
| PVX_084810 | 0.5628  | 0.3668  | 0.3428  | 0.242   | 0.0071  | -0.3452 | -0.2043 | -0.1358 | -0.5105 |
| PVX_097875 | 0.0236  | -0.2258 | -0.5319 | -0.8538 | -0.8141 | -0.69   | -0.3356 | 0.2099  | 0.1871  |
| PVX_114770 | -0.3431 | -0.1852 | -0.2835 | -0.3368 | -0.128  | 0.2105  | 0.124   | -0.2585 | -0.0194 |
| PVX_098855 | -0.351  | -0.3242 | -0.1587 | 0.0536  | 0.3037  | 0.3758  | -0.1551 | -0.3465 | -0.2561 |
| PVX_122380 | 0.3306  | 0.4409  | 0.476   | 0.4192  | 0.1701  | -0.3664 | 0.0578  | 0.4631  | 0.8832  |
| PVX_085035 | 0.04    | 0.4879  | 0.5877  | 0.3931  | 0.3795  | 0.1395  | 0.3598  | 0.1997  | 0.226   |
| PVX_095065 | -0.6733 | -0.9442 | -0.8315 | -0.1571 | 0.5805  | 0.7874  | 0.5672  | -0.0707 | -0.6946 |
| PVX_011610 | 0.0624  | -0.0323 | -0.1309 | -0.1564 | -0.3718 | -0.5492 | -0.4185 | -0.2449 | -0.1822 |
| PVX_087050 | 0.2751  | 0.0291  | -0.22   | -0.2179 | -0.0408 | -0.322  | 0.5101  | 1.085   | 0.6866  |
| PVX_082620 | 0.3893  | 0.9066  | 0.7618  | 0.0819  | -0.4411 | -0.6684 | -0.5856 | -0.4281 | -0.3846 |
| PVX_095020 | 0.5744  | -0.0938 | -0.4348 | -0.7911 | -0.3829 | -0.2955 | 0.1322  | 0.7865  | 0.853   |
| PVX_123650 | -0.5684 | -0.6331 | -0.6392 | -0.5241 | -0.3754 | 1.0198  | 1.0575  | 0.5232  | 0.1617  |
| PVX_086030 | 0.2757  | 0.192   | 0.0947  | 0.0767  | 0.1209  | -0.0858 | 0.0073  | 0.3771  | 0.0921  |
| PVX_081380 | 0.4456  | 0.556   | 0.8083  | 0.9289  | 1.1717  | 0.7549  | 0.3073  | 0.1465  | 0.0526  |
| PVX_001020 | 0.6599  | 0.4288  | 0.3455  | 0.129   | 0.1915  | 0.3249  | 0.5651  | 0.5887  | 0.3644  |
| PVX_100810 | 0.9023  | 0.6485  | 0.7421  | 0.538   | -0.2556 | -0.521  | -0.6098 | -0.2968 | -0.1758 |
| PVX_085890 | 0.1437  | 0.3975  | 0.3211  | 0.103   | -0.4607 | 0.0853  | 0.7007  | 0.1646  | -0.2107 |
| PVX_117050 | 0.9369  | 0.3242  | -0.2236 | -0.4927 | -0.6386 | -0.7123 | 0.1573  | 0.849   | 1.0429  |
| PVX_115155 | -0.7409 | -0.38   | -0.416  | -0.2902 | 0.2539  | 0.8462  | 0.0675  | -0.8987 | -1.1336 |
| PVX_086045 | 0.3042  | -0.016  | -0.1139 | -0.3348 | 0.0079  | 0.1795  | 0.5027  | 0.6727  | 0.8796  |
| PVX_122845 | -0.6226 | -0.8191 | -1.1177 | -1.329  | -1.3895 | -0.1428 | 1.5515  | 1.0179  | 0.669   |

|            |         |         |         |         |         |         |         |         |         |
|------------|---------|---------|---------|---------|---------|---------|---------|---------|---------|
| PVX_091970 | -0.3456 | -0.8406 | -0.489  | 0.2283  | 0.5901  | 0.268   | 0.034   | -0.0308 | -0.4682 |
| PVX_086245 | 1.2763  | 0.7183  | 0.2551  | -0.02   | -0.3594 | -0.1844 | 0.5542  | 1.2013  | 1.4     |
| PVX_114605 | -0.1213 | 0.3297  | -0.0589 | -0.2937 | -0.5896 | -0.8521 | -0.3291 | 0.8719  | 0.9961  |
| PVX_080055 | 0.3863  | 0.4816  | 0.1122  | -0.2596 | -0.5161 | -0.6482 | -0.5079 | -0.06   | -0.0525 |
| PVX_117895 | 0.0972  | -0.3647 | -0.677  | -1.0159 | -0.7216 | 0.5973  | 0.56    | 0.3092  | 0.6696  |
| PVX_084395 | -0.0742 | -0.1211 | -0.0285 | 0.2624  | 0.3422  | 0.3538  | 0.1345  | 0.1168  | 0.3032  |
| PVX_089515 | 0.095   | 0.067   | 0.045   | 0.0163  | 0.0234  | 0.0815  | 0.1336  | 0.1349  | -0.146  |
| PVX_087700 | 0.1402  | 0.3179  | 0.3812  | 0.4552  | 0.5999  | 0.4357  | -0.1511 | 0.0403  | 0.2835  |
| PVX_115165 | -0.3256 | -0.5066 | -0.7243 | -1.0182 | -0.6022 | -0.8538 | -0.7161 | -0.4449 | 0.278   |
| PVX_085330 | 0.4094  | 0.1884  | 0.0514  | 0.0074  | -0.13   | 0.0458  | -0.3894 | -1.0066 | -1.0369 |
| PVX_122625 | 0.0785  | -0.3698 | -0.3169 | -0.0859 | -0.2077 | -0.414  | 0.3338  | 0.6855  | 0.2812  |
| PVX_002780 | -1.129  | -0.1472 | -0.1079 | -0.1232 | 0.0163  | 0.3225  | 1.0212  | 0.649   | 0.0859  |
| PVX_117615 | -1.2144 | -0.1908 | -0.2122 | -0.237  | -0.2556 | 0.3413  | 1.0279  | 0.0205  | -0.4323 |
| PVX_081670 | -0.2607 | -0.0483 | 0.3414  | 0.262   | 0.6999  | 0.7402  | 0.1982  | 0.1041  | -0.1875 |
| PVX_108260 | 0.2706  | 0.2217  | 0.2202  | 0       | -0.3304 | -0.2802 | -0.0711 | -0.2363 | 0.1108  |
| PVX_122995 | -0.555  | -0.2376 | -0.0872 | 0.2191  | 0.3703  | 0.4399  | -0.4823 | -0.7261 | -0.757  |
| PVX_099595 | -0.217  | -0.3387 | -0.0589 | 0.264   | 0.3988  | 0.2365  | 0.5552  | 0.3045  | 0.1122  |
| PVX_089990 | 0.5258  | -0.0949 | 0.1469  | 0.2921  | 0.3343  | -0.0195 | 0.0879  | 0.4824  | 0.4556  |
| PVX_083235 | 0.54    | -0.0818 | -0.5983 | -0.8969 | -1.039  | -0.7007 | 0.1429  | 0.6373  | 0.8148  |
| PVX_097900 | 0.0142  | 0.4098  | 0.3582  | 0.3634  | 0.3594  | 0.1465  | -0.1292 | 0.0969  | -0.2009 |
| PVX_089490 | -0.2031 | -0.059  | -0.1658 | -0.1971 | -0.2067 | 0.3187  | 0.387   | 0.2641  | 0.1528  |
| PVX_000735 | -0.1573 | 0.1874  | 0.136   | 0.2985  | 0.1679  | 0.3684  | 0.0016  | -0.3142 | -0.8525 |
| PVX_118620 | -0.679  | -0.152  | 0.1888  | 0.4525  | 0.4294  | 0.4178  | -0.6244 | -1.0366 | -1.0559 |
| PVX_123690 | 0.5166  | 0.018   | -0.2361 | -0.8974 | -1.148  | -0.9716 | -0.6389 | 0.232   | 1.1043  |
| PVX_098755 | 0.5885  | 0.3932  | 0.3682  | 0.2693  | -0.1576 | -0.4318 | -0.298  | 0.4689  | 0.9112  |
| PVX_113415 | -0.7383 | 0.3162  | 0.9792  | 0.9414  | 0.7067  | -0.1164 | -0.6172 | -0.7228 | -0.5605 |
| PVX_089835 | -0.1086 | -0.3948 | -0.6104 | -0.4477 | -0.7626 | -0.5998 | 1.0434  | 1.0199  | 0.4535  |
| PVX_089670 | -0.0189 | 0.3061  | 0.015   | -0.2272 | -0.3131 | -0.4839 | -1.1792 | -0.4139 | -0.0551 |
| PVX_100820 | 0.168   | 0.0737  | 0.169   | 0.1296  | 0.4313  | 1.1009  | 0.7083  | -0.3122 | -0.5025 |
| PVX_100680 | -0.7113 | -0.64   | -0.0405 | -0.1291 | 0.2818  | 0.2768  | -0.1794 | -0.2677 | -0.6005 |
| PVX_001095 | 0.0343  | 0.256   | 0.524   | 0.5764  | 0.8228  | 0.3441  | -0.1667 | -0.3145 | -0.2178 |
| PVX_122985 | -0.5568 | 0.4389  | 0.9122  | 0.7415  | 0.6641  | 0.1165  | -0.0677 | -0.233  | -0.1416 |
| PVX_096395 | -0.1966 | -0.1764 | -0.2322 | -0.0955 | 0.0318  | -0.1196 | -0.2095 | -0.0335 | -0.2619 |
| PVX_099060 | 0.1741  | -0.164  | -0.2525 | -0.3894 | -0.3994 | -0.4711 | -0.5065 | 0.51    | 0.832   |
| PVX_117080 | 0.0185  | 0.3428  | 0.6387  | 0.8889  | 0.8068  | 0.0194  | 0.0147  | 0.1656  | 0.4332  |
| PVX_092015 | -0.2499 | -0.625  | -0.8832 | -0.8275 | 0.0594  | 0.8175  | 0.7477  | 0.3669  | 0.2523  |
| PVX_094670 | 1.1456  | 0.4225  | -0.3326 | -1.0284 | -1.3113 | -1.3498 | -0.4123 | 0.8063  | 1.5778  |
| PVX_101595 | 1.4901  | 0.4794  | -0.257  | -0.4265 | -1.0515 | -1.2035 | -1.2    | -0.939  | -0.293  |
| PVX_100750 | -0.4333 | -0.0066 | 0.1413  | 0.088   | 0.1611  | 0.4929  | 0.5172  | -0.0938 | -0.2449 |
| PVX_124100 | -0.6304 | 0.0986  | 0.4256  | 0.5377  | 0.4267  | -0.2965 | -1.0525 | -1.4316 | -1.441  |
| PVX_086875 | 0.2146  | 0.2323  | -0.0213 | 0.0316  | -0.1978 | -0.4692 | -0.0953 | 0.3251  | 0.2394  |
| PVX_085405 | 0.0852  | 0.3619  | 0.3693  | 0.3818  | 0.2245  | 0.0008  | 0.0079  | 0.035   | 0.0227  |
| PVX_090875 | -0.0797 | 0.1598  | 0.3371  | 0.5326  | 0.5343  | -0.0558 | -0.6201 | -0.5771 | -0.3078 |
| PVX_114125 | 0.1252  | -0.2392 | -0.348  | -0.0569 | 0.2979  | 0.0635  | -0.0571 | 0       | 0.4895  |
| PVX_088935 | -1.135  | -0.6488 | -0.3038 | 0.1454  | 0.4805  | 0.6024  | 0.1108  | -0.5201 | -0.7388 |
| PVX_085190 | -0.7485 | -0.853  | -0.1228 | 0.3896  | 0.6953  | 0.8927  | 0.0133  | -0.5923 | -0.3017 |
| PVX_097650 | 0.0877  | 0.6725  | 0.5768  | 0.4432  | 0.3328  | 0.0826  | -0.1682 | -0.1788 | -0.1632 |
| PVX_116880 | 0.1623  | 0.2634  | 0.1401  | -0.1826 | -0.1032 | -0.26   | 0.3358  | 0.3334  | 0.0699  |
| PVX_085850 | -0.7924 | -1.054  | -0.4672 | 0.3869  | 0.7784  | 0.9072  | 0.3292  | -0.2729 | -0.5166 |
| PVX_092245 | -0.4534 | -0.5923 | -0.5837 | -0.6066 | 0.2605  | 0.4705  | 1.0149  | 1.2663  | 0.6924  |
| PVX_079890 | -0.286  | -0.9342 | -1.1496 | -1.2296 | 0.0055  | 0.5658  | 0.5365  | 0.2405  | 0.3975  |
| PVX_079865 | -0.341  | 0.1361  | 0.2248  | 0.2471  | 0.4632  | -0.0886 | -1.0322 | -0.9761 | -0.8846 |
| PVX_123135 | 0.2838  | 0.2978  | 0.1928  | 0.0113  | 0.0502  | 0.3269  | 0.5859  | 0.5119  | 0.0551  |
| PVX_096125 | -0.3601 | -0.2342 | -0.2959 | -0.5649 | -0.7752 | -1.0346 | -0.9621 | -0.647  | -0.6927 |
| PVX_099325 | -0.4692 | -0.24   | -0.2061 | -0.4288 | -0.1815 | -0.7061 | -1.0544 | 1.0482  | 1.2931  |
| PVX_091115 | 0.9078  | 0.5968  | 0.6685  | 0.6147  | 0.3285  | -0.2895 | 0.0407  | 0.6671  | 0.9091  |
| PVX_114035 | -0.2541 | 0.6954  | 0.8824  | 0.8023  | 0.4523  | 0.1698  | -0.7478 | -1.0392 | -1.0732 |
| PVX_119550 | 0.0481  | -0.0964 | -0.3578 | -0.5772 | -0.1238 | 0.1589  | 0.4485  | 1.195   | 0.715   |
| PVX_097945 | -0.5336 | 0.0714  | 0.2371  | 0.2104  | 0.4406  | 0.1711  | 0.071   | -0.2189 | -0.5259 |
| PVX_001780 | -0.3822 | 0.0382  | 0.1115  | 0.0516  | 0.2492  | 0.6179  | 0.5255  | 0.5184  | -0.0103 |
| PVX_117865 | 0.0055  | 0.1769  | 0.2421  | 0.4566  | 0.2201  | -0.1541 | -0.5308 | 0.5022  | 0.5408  |
| PVX_000935 | 0.3695  | 0.3933  | 0.3984  | 0.3036  | 0.5025  | 0.5409  | 0.0821  | -0.598  | -0.4394 |
| PVX_091790 | 0.343   | 0.302   | 0.1851  | 0.1651  | 0.3318  | 0.6012  | -0.1123 | -0.6908 | -0.7804 |

|            |         |         |         |         |         |         |         |         |         |
|------------|---------|---------|---------|---------|---------|---------|---------|---------|---------|
| PVX_003785 | -0.3114 | 0.0427  | -0.0127 | 0.0325  | -0.0402 | -0.6274 | -0.553  | -0.2187 | -0.6202 |
| PVX_086330 | -0.2489 | -0.4284 | -0.162  | -0.0691 | -0.1593 | 0.0638  | -0.0393 | 0.237   | 0.5635  |
| PVX_096330 | -0.7279 | -0.3062 | -0.1477 | -0.0858 | 0.1333  | -0.0543 | -0.3392 | -0.6656 | -0.8881 |
| PVX_083245 | -0.0638 | -0.0541 | -0.011  | 0.0153  | 0.4161  | 0.5359  | 0.3188  | 0.212   | 0.0526  |
| PVX_083025 | 0.3975  | 0.1073  | -0.1533 | -0.3982 | -0.0245 | -0.0192 | 0.09    | 0.4402  | 0.7455  |
| PVX_119600 | 0.5431  | 0.4587  | 0.3482  | 0.4118  | 0.4687  | 0.2563  | 0.1248  | 0.2833  | 0.2115  |
| PVX_089655 | -0.9872 | -0.1268 | 0.319   | 0.4443  | 0.4198  | 0.033   | -0.5303 | -0.9417 | -1.0382 |
| PVX_089560 | -0.3668 | -0.1547 | 0.2258  | 0.5357  | 0.3967  | 0.5142  | -0.0031 | -0.036  | -0.2212 |
| PVX_082565 | 0.6561  | 0.4176  | 0.4109  | 0.4284  | 0.0918  | 0.1508  | -0.156  | -0.1734 | 0.0483  |
| PVX_080465 | 1.0567  | 0.1775  | -0.2978 | -0.9881 | -1.382  | -0.9863 | 0.4852  | 0.9284  | 1.3611  |
| PVX_091710 | 0.1767  | -0.0521 | -0.2002 | -0.3607 | -0.2366 | -0.263  | 0.1972  | 0.5307  | 0.6984  |
| PVX_119640 | -0.4364 | -0.1377 | -0.0391 | 0.0932  | -0.2328 | -0.4719 | -0.3362 | -0.2131 | -0.6311 |
| PVX_083560 | -0.2728 | 0.238   | 0.158   | 0.0851  | -0.0663 | 0.0474  | -0.322  | -0.7525 | -0.5797 |
| PVX_114440 | 0.2441  | 0.5613  | 0.5875  | 0.6278  | 0.5045  | 0.0116  | -0.4115 | -0.3724 | -0.2752 |
| PVX_119250 | -0.1095 | -0.339  | -0.2648 | -0.09   | 0.2842  | 0.7884  | 0.365   | -0.2411 | -0.3893 |
| PVX_089275 | 0.0481  | -0.1371 | -0.2763 | -0.5008 | -0.4238 | 0.0948  | 0.4184  | -0.4519 | -0.3144 |
| PVX_089030 | 0.0304  | 0.3571  | 0.553   | 0.5587  | 0.4852  | -0.1334 | 0.1982  | -0.2306 | -0.5868 |
| PVX_121345 | -0.0606 | -0.1793 | -0.4807 | -0.5341 | -0.4075 | -0.0702 | 0.1448  | 0.5284  | 0.3956  |
| PVX_002685 | -0.1485 | -0.1383 | 0.131   | 0.2466  | 0.4472  | 0.6443  | 0.2112  | -0.0692 | -0.0464 |
| PVX_080345 | -0.6331 | -0.1007 | -0.0229 | 0.0421  | -0.0452 | 0.0281  | 0.5111  | 0.12    | -0.397  |
| PVX_114670 | 0.3333  | 0.501   | 0.2051  | 0.094   | 0.2264  | 0.6602  | 0.3626  | -0.5242 | -0.7664 |
| PVX_122015 | -1.0377 | -1.0815 | -1.0249 | -0.8467 | -0.662  | 0.6407  | 1.3119  | 0.5541  | 0.0427  |
| PVX_101470 | 0.8526  | 0.2941  | 0.2416  | 0.1462  | -0.0849 | 0.1084  | -0.5732 | -0.6107 | -0.5157 |
| PVX_091520 | 0.3721  | 0.8962  | 0.8506  | 0.6362  | 0.5567  | -0.3483 | -0.5772 | -0.2549 | -0.3621 |
| PVX_084095 | 1.7188  | 0.7811  | 0.3107  | 0.4175  | 0.1235  | -0.0156 | -0.1614 | 0.1283  | 0.311   |
| PVX_081585 | -0.3435 | -0.2639 | -0.2003 | -0.4152 | -0.4669 | -0.2426 | 0.1603  | 0.4667  | 0.2197  |
| PVX_090275 | 1.6601  | -0.012  | -1.0145 | -1.4739 | -1.6459 | -0.2729 | -0.3297 | -0.7858 | -0.3657 |
| PVX_085670 | 0.3372  | 0.7971  | 0.6884  | 0.2577  | -0.1332 | -0.4822 | 0.3472  | 0.2657  | 0.5233  |
| PVX_003570 | -0.5743 | -0.3762 | -0.4025 | -0.3816 | -0.4725 | -0.4084 | -0.3782 | -0.3589 | -0.5088 |
| PVX_085350 | -0.2144 | -0.6181 | -0.5921 | -0.0701 | 0.0152  | 0.3518  | 0.9052  | 1.0913  | 0.5127  |
| PVX_098085 | 0.0455  | 0.103   | -0.0049 | -0.1552 | -0.0957 | 0.2158  | 0.2811  | -0.0031 | 0.2298  |
| PVX_119210 | 1.592   | 1.3895  | 1.0775  | 0.4608  | 0.3644  | -0.2775 | -0.4341 | -0.5285 | -0.1608 |
| PVX_098750 | -0.2068 | -0.4066 | -0.3552 | -0.2602 | 0.073   | 0.5965  | 0.4839  | -0.0893 | -0.1611 |
| PVX_100580 | -0.906  | -0.9865 | -0.9306 | -0.8499 | -0.6352 | 0.4549  | 1.1771  | 0.4296  | -0.2665 |
| PVX_114145 | -1.5824 | -1.7799 | -1.8379 | -2.0434 | -1.8463 | -1.0974 | 1.3945  | 1.0298  | 0.0495  |
| PVX_115240 | 0.6235  | 0.4717  | -0.0832 | -0.1725 | -0.2283 | -0.1018 | 0.1816  | 0.3285  | 0.6433  |
| PVX_092090 | -0.2952 | -0.0865 | 0.3838  | 0.56    | 0.5555  | 0.6884  | 0.0851  | -0.2666 | -0.3865 |
| PVX_091020 | 1.0418  | 0.5456  | 0.0563  | -0.4044 | -0.5773 | -0.8793 | 0.3665  | 1.0879  | 1.2471  |
| PVX_083520 | 0.9199  | 0.3963  | 0.1969  | 0.2169  | 0.1721  | -0.1228 | 0.241   | 0.993   | 1.427   |
| PVX_085335 | 0.3273  | 0.2197  | -0.0754 | -0.1812 | -0.3608 | -0.315  | -0.0324 | 0.4157  | 0.1631  |
| PVX_091645 | 0.2315  | 0.1207  | -0.2459 | -0.4011 | -0.6659 | -0.003  | 0.1038  | -0.1394 | -0.2705 |
| PVX_099190 | -0.0364 | -0.5541 | 0.0098  | 0.4266  | 0.7845  | 0.0536  | -0.4912 | -0.0202 | 0.1541  |
| PVX_002745 | -0.013  | -0.3607 | -0.7188 | -0.9547 | -0.8188 | 0.8345  | 1.1779  | 0.6537  | 0.3822  |
| PVX_101025 | -0.6013 | -0.4063 | -0.0047 | 0.3822  | 0.6565  | 0.5056  | 0       | -0.4436 | -0.39   |
| PVX_122305 | 0.2628  | 0.0044  | -0.0999 | -0.0012 | 0.2121  | 0.4351  | 0.6293  | 0.3278  | 0.0325  |
| PVX_110875 | 0.6419  | -0.1986 | 0.3173  | 0.3171  | 0.2854  | -0.3027 | 0.252   | 0.7089  | 0.7938  |
| PVX_090075 | -1.1467 | -1.5501 | -1.6989 | -2.1019 | -1.8901 | -1.8046 | 1.3896  | 1.5042  | 0.2353  |
| PVX_123220 | -0.4155 | -0.6434 | -0.843  | -0.9041 | 0.1361  | 0.4498  | 0.7075  | 0.4629  | 0.0823  |
| PVX_100825 | -0.6541 | -0.624  | -0.6431 | -0.3517 | -0.3356 | 0.0679  | 0.3839  | 0.1252  | -0.3287 |
| PVX_090145 | -1.5988 | -1.1754 | -0.9467 | -0.7716 | -0.3825 | 0.5068  | 0.9704  | 0.3351  | -0.4192 |
| PVX_096055 | -0.7197 | -0.6103 | -0.6967 | -0.1672 | -0.3589 | -0.7898 | -1.0194 | 0.6531  | 1.1101  |
| PVX_089555 | 0.6061  | 0.7479  | 0.9456  | 0.6331  | 0.4119  | 0.1842  | 0.2339  | 0.5179  | 0.478   |
| PVX_084935 | -0.2208 | -0.3597 | -0.4099 | -0.3254 | 0.0258  | 0.5924  | 0.989   | 0.6674  | 0.3572  |
| PVX_111310 | 0.2169  | 0.422   | 0.4165  | 0.2599  | 0.1078  | 0.2215  | 0.0176  | -0.4602 | -0.6677 |
| PVX_099575 | -0.2068 | -0.0802 | 0.2354  | -0.0308 | 0.1621  | -0.1149 | -0.1551 | -0.0977 | -0.1534 |
| PVX_118435 | 0.2856  | 0.2717  | 0.3044  | 0.2907  | 0.1677  | 0.0963  | 0.2449  | -0.1436 | -0.1516 |
| PVX_122155 | -0.7772 | -0.0842 | 0.2079  | 0.2756  | 0.4255  | 0.5693  | 0.4946  | -0.4452 | -0.5475 |
| PVX_088885 | -0.1482 | -0.3727 | -0.2772 | -0.102  | 0.4303  | 0.2862  | 0.2289  | -0.1412 | -0.1857 |
| PVX_117515 | 0.3647  | 0.1756  | -0.0568 | -0.2576 | 0.2589  | 0.6981  | 0.4639  | 0.0616  | -0.0876 |
| PVX_003850 | -0.4891 | -0.4625 | -0.4327 | -0.3911 | -0.175  | 0.5216  | 0.9145  | 1.1488  | 0.5662  |
| PVX_121350 | 1.7634  | 1.2822  | 0.8658  | 0.6028  | 0.5076  | 0.4269  | -0.0037 | -0.1568 | -0.0944 |
| PVX_084275 | -0.2477 | -0.2518 | -0.3133 | 0.0245  | -0.0284 | -0.3324 | -0.1522 | 0.1652  | 0.3737  |
| PVX_001620 | -0.473  | -0.3231 | -0.4577 | -0.3735 | 0.4356  | 1.0593  | 0.8156  | 0.3403  | -0.2523 |



|            |         |         |         |         |         |         |         |         |         |
|------------|---------|---------|---------|---------|---------|---------|---------|---------|---------|
| PVX_116545 | -0.1058 | -0.0954 | -0.342  | -0.3509 | -0.4063 | 0.1045  | 0.5002  | 0.2455  | 0.0424  |
| PVX_122505 | 1.5518  | 0.2832  | 0.0332  | -0.1756 | -0.42   | -0.8468 | -1.1247 | -0.8119 | -0.3333 |
| PVX_124055 | -0.9329 | -0.5624 | 0.2519  | 0.5431  | 0.61    | 0.1764  | -0.537  | -0.6095 | -0.4287 |
| PVX_088080 | 0.0309  | 0.3775  | 0.7591  | 0.8632  | 0.7956  | 0.3755  | -0.0897 | -0.2874 | -0.2167 |
| PVX_089260 | -0.3102 | 0.3662  | 0.802   | 0.9206  | 0.6571  | 0.2315  | -0.2572 | -0.2647 | -0.1242 |
| PVX_098070 | 0.0197  | 0.4111  | 0.5711  | 0.5288  | 0.2992  | 0.4336  | 0.0437  | -0.5164 | -0.4282 |
| PVX_083405 | 0.5757  | 0.565   | 0.6671  | 0.6105  | 0.3702  | -0.2606 | -0.6653 | -0.2186 | 0.2937  |
| PVX_086050 | -0.0828 | -0.2229 | -0.3754 | -0.3254 | -0.3404 | -0.1427 | 0.0611  | 0.5718  | 0.7071  |
| PVX_092340 | 0.346   | 0.1012  | 0.1558  | 0.3105  | 0.2831  | 0.3367  | 0.5124  | 0.6913  | 0.4018  |
| PVX_091375 | -0.2661 | 0.2244  | 0.2295  | 0.1907  | 0.1605  | -0.0352 | 0.2682  | 0.0737  | -0.3241 |
| PVX_096360 | 0.8171  | 0.0929  | -0.3747 | -0.6736 | -0.9018 | -0.3087 | 0.273   | 0.7665  | 1.0303  |
| PVX_085810 | -0.1211 | 0.0433  | 0.0691  | 0.04    | 0.1227  | 0.1391  | -0.2177 | -0.4403 | -0.4393 |
| PVX_091655 | -1.213  | -0.2054 | 0.1294  | 0.2994  | 0.1842  | 0.6027  | 0.3742  | -0.2343 | -0.9071 |
| PVX_092995 | 1.9063  | 0.1075  | -0.9145 | -1.3675 | -1.6519 | -1.5616 | -1.496  | -0.6426 | 0.2051  |
| PVX_094770 | 0.4684  | -0.2233 | -0.7222 | -1.1488 | -1.0403 | -0.9052 | -0.1175 | 0.499   | 0.9907  |
| PVX_081290 | 0.6048  | 0.5259  | 0.3584  | 0.1678  | -0.1656 | -0.3333 | -0.3551 | 0.2082  | 0.6779  |
| PVX_086260 | 0.4348  | 0.1925  | -0.1279 | -0.242  | 0.1123  | -0.175  | 0.2793  | 0.5642  | 0.843   |
| PVX_084535 | -0.0572 | -0.1386 | -0.3988 | -0.4924 | -0.6651 | -0.4706 | 0.089   | 0.5545  | 0.5188  |
| PVX_081690 | 0.1482  | 0.1437  | 0.524   | 0.6989  | 0.6791  | 0.4258  | -0.0692 | 0.2017  | 0.0756  |
| PVX_002840 | 0.9173  | 0.6578  | 0.5541  | 0.4166  | 0.5585  | 0.282   | -0.0711 | -0.2598 | -0.1181 |
| PVX_123165 | -0.7538 | -0.1553 | 0.2613  | 0.3935  | 0.3404  | 0.4178  | 0.068   | -0.5427 | -0.6836 |
| PVX_083445 | 0.6879  | 0.5175  | 0.335   | 0.1243  | 0.086   | 0.2765  | 0.1238  | 0.3985  | 0.5967  |
| PVX_087130 | -0.0318 | 0.3364  | 0.3533  | 0.376   | 0.372   | 0.0822  | 0.1887  | 0.2344  | -0.089  |
| PVX_085800 | -0.1013 | -0.1714 | -0.0492 | 0.1193  | 0.1663  | 0.2277  | 0.1355  | 0.2174  | 0.1139  |
| PVX_123895 | 0.3822  | 0.3976  | 0.2295  | 0.0291  | 0.0218  | 0.1585  | 0.4465  | 0.534   | 0.2988  |
| PVX_092175 | -0.6849 | -0.2291 | -0.1561 | 0.0486  | -0.1715 | -0.7272 | -0.7736 | -0.7142 | -0.9824 |
| PVX_099955 | 0.0605  | 0.1507  | -0.2696 | -0.5079 | -0.4389 | 0.8877  | 0.5014  | -0.0932 | 0.102   |
| PVX_085020 | -0.5    | 0.0245  | 0.2228  | 0.3299  | 0.583   | 0.2911  | 0.0068  | -0.0791 | -0.364  |
| PVX_000690 | 0.3993  | 0.0805  | 0.1995  | 0.4329  | 0.3366  | 0.6501  | 0.4805  | -0.0539 | -0.232  |
| PVX_099530 | -0.6308 | -0.4318 | 0.4612  | 0.7082  | 0.7973  | -0.0915 | -0.5317 | -0.1739 | -0.4263 |
| PVX_094265 | 0.1246  | 0.2201  | 0.2148  | 0.4047  | 0.2416  | 0.0055  | -0.1846 | -0.0355 | -0.1668 |
| PVX_088895 | -0.1522 | 0.5319  | 0.6198  | 0.3587  | 0.1167  | -0.3389 | -0.8203 | -0.9062 | -0.7163 |
| PVX_110860 | -0.5194 | -0.6863 | -0.7698 | -0.8665 | -0.1877 | 0.4804  | 0.9273  | 0.7324  | 0.5219  |
| PVX_078195 | 0.6274  | 0.5554  | 0.4809  | 0.2265  | 0.1477  | -0.6777 | -0.8968 | -0.2584 | 0.2947  |
| PVX_080505 | 1.0521  | 0.9391  | 0.8977  | 0.7361  | 0.4387  | 0.0782  | -0.1677 | -0.1238 | 0.1189  |
| PVX_095100 | 1.1922  | 0.1785  | -0.1903 | -0.1812 | -0.2581 | -0.6215 | 0.147   | 0.7415  | 1.1193  |
| PVX_080285 | -0.7631 | -0.8606 | -0.889  | -0.8798 | -0.6769 | 0.2577  | 0.4479  | -0.9137 | -0.9378 |
| PVX_081515 | 0.6184  | 0.8848  | 0.3955  | 0.1236  | -0.0926 | -0.6107 | -0.9755 | -0.4901 | 0.0239  |
| PVX_121995 | -0.2634 | -0.4996 | 0.0831  | 0.1216  | 0.3268  | 0.4258  | -0.2511 | -0.4219 | -0.1242 |
| PVX_089585 | 0.7057  | 0.7513  | 0.266   | -0.396  | -0.6792 | -0.7925 | -0.442  | 0.3459  | 1.1783  |
| PVX_114140 | 0.1891  | 0.4537  | 0.6684  | 0.4607  | 0.6398  | 0.3268  | 0.3388  | 0.097   | 0.2471  |
| PVX_118475 | -0.3724 | 0.1061  | 0.4737  | 0.7312  | 0.5751  | -0.2594 | 0.0474  | 0.0804  | -0.2821 |
| PVX_089910 | -1.0925 | -0.8112 | -0.5341 | -0.4212 | 0.3439  | 0.9672  | 0.4342  | -0.4556 | -0.6764 |
| PVX_122795 | 0.5461  | 0.1666  | -0.1057 | -0.2369 | 0.1189  | 0.2372  | 0.3168  | 0.6407  | 0.7975  |
| PVX_111245 | -1.6535 | -1.9189 | -2.4107 | -2.6327 | -1.9067 | 0.7074  | 0.8267  | 0.1078  | -0.6412 |
| PVX_089775 | 1.4004  | 0.4739  | -0.0774 | -0.3812 | -0.7443 | -0.6528 | -0.1852 | -0.133  | -0.086  |
| PVX_092040 | 0.282   | 0.3068  | 0.3811  | 0.5078  | 0.2983  | 0.5301  | 0.5298  | 0.4041  | 0.0206  |
| PVX_118525 | -0.5782 | -0.2704 | -0.0994 | -0.1539 | -0.3667 | 0.071   | 0.533   | 0.241   | -0.2232 |
| PVX_092215 | 0.3739  | 0.6696  | 0.7203  | 0.8304  | 0.7263  | -0.0398 | -0.7646 | -1.0799 | -0.9576 |
| PVX_118045 | -0.0734 | 0.2432  | 0.5606  | 0.6358  | 0.5288  | -0.0657 | -0.0131 | 0.2497  | 0.5153  |
| PVX_084695 | -1.1588 | -0.0341 | 0.2885  | 0.6038  | 0.4192  | 0.8492  | -0.3989 | -0.7803 | -1.0661 |
| PVX_003575 | -0.5226 | -0.4829 | -0.4629 | -0.2099 | 0.0745  | -0.0343 | -0.0008 | -0.0795 | -0.1105 |
| PVX_098715 | -2.177  | -1.8067 | -2.5056 | -2.671  | -2.7439 | 0.0325  | 0.8667  | 0.3079  | -0.1557 |
| PVX_101530 | 1.2311  | 0.3655  | -0.9856 | -1.6956 | -2.2303 | -2.2539 | -2.1306 | -0.76   | 0.1356  |
| PVX_086895 | 0.1655  | -0.0562 | -0.1831 | 0.1048  | -0.1267 | -0.1461 | -0.1678 | -0.1415 | -0.3602 |
| PVX_085270 | 0.4586  | 0.7679  | 0.7332  | 0.817   | 0.7017  | 0.3996  | -0.3122 | -0.9198 | -0.7894 |
| PVX_119735 | 0.6315  | 0.6069  | 0.442   | 0.3252  | -0.0256 | 0.1375  | -0.3719 | 0.0334  | 0.6032  |
| PVX_114715 | 0.5733  | 0.6143  | 0.6377  | 0.3177  | 0.194   | 0.0371  | -0.3395 | -0.3579 | -0.2038 |
| PVX_116675 | -0.4343 | 0.293   | 0.4122  | 0.4395  | 0.4639  | 0.629   | -0.1225 | -1.029  | -1.2287 |
| PVX_100715 | 0.1399  | 0.0912  | 0.1109  | 0.0743  | 0.0103  | -0.342  | -0.1971 | -0.3483 | -0.5151 |
| PVX_117910 | 0.1777  | 0.0636  | -0.0062 | -0.025  | -0.0377 | 0.5619  | 0.3126  | -0.3817 | -0.3291 |
| PVX_085600 | 0.1808  | 0.2607  | -0.0801 | -0.1684 | 0.0405  | 0.1822  | 0.5256  | 0.9323  | 0.932   |
| PVX_084390 | 0.3079  | 0.0716  | 0.1116  | -0.0127 | -0.0143 | -0.0586 | -0.136  | -0.4412 | -0.4282 |

|            |         |         |         |         |         |         |         |         |         |
|------------|---------|---------|---------|---------|---------|---------|---------|---------|---------|
| PVX_088780 | 0.4782  | 0.3972  | 0.2925  | 0.342   | 0.3774  | 0.356   | 0.5107  | 0.8079  | 0.9551  |
| PVX_123620 | -0.8157 | -0.4422 | -0.3207 | -0.1361 | -0.0171 | 0.489   | -0.095  | -0.6907 | -0.8047 |
| PVX_091850 | -0.0271 | 0.6195  | 0.9781  | 0.9095  | 0.4246  | -0.7735 | -0.9264 | -0.7491 | -0.3619 |
| PVX_113870 | -0.409  | -0.2551 | -0.6621 | -0.6976 | -0.5222 | -0.0435 | 0.6778  | 0.5029  | 0.1055  |
| PVX_091195 | 0.3264  | 0.3617  | 0.3893  | 0.2314  | 0.3311  | 0.2802  | 0.3137  | 0.3876  | 0.0865  |
| PVX_087010 | -0.0833 | 0.395   | 0.6941  | 1.041   | 1.0162  | 0.4186  | -0.1103 | -0.2949 | -0.3354 |
| PVX_080515 | 0.5424  | 0.7113  | 0.6541  | 0.2419  | -0.5222 | -0.8523 | -0.5683 | -0.201  | 0.2768  |
| PVX_003520 | -2.4903 | -2.4592 | -2.6069 | -2.8133 | -2.4721 | 1.1495  | 1.3088  | 0.1218  | -0.5803 |
| PVX_117020 | 0.0193  | 0.0182  | 0.0752  | 0.271   | 0.0208  | -0.3813 | -0.631  | -0.7713 | -0.6884 |
| PVX_108765 | 0.2424  | 0.1871  | 0.1423  | -0.045  | 0.0275  | -0.0232 | -0.2459 | -0.3269 | -0.1264 |
| PVX_117935 | -0.6247 | 0.0781  | 0.8126  | 0.7032  | 0.5554  | -0.0923 | -0.2807 | -0.2953 | -0.3968 |
| PVX_001730 | -0.5004 | -0.7352 | -0.2494 | -0.0256 | 0.1235  | -0.3098 | 0.1757  | 0.045   | -0.0596 |
| PVX_118635 | -0.4661 | 0.397   | 0.5489  | 0.7     | 0.3965  | 0.0608  | -0.6051 | -0.4819 | -0.3675 |
| PVX_094975 | 0.3237  | 0.0878  | 0.1317  | -0.1157 | -0.0175 | 0.4793  | 0.4664  | 0.0194  | -0.3445 |
| PVX_080395 | 0.1184  | -0.1616 | 0.0754  | -0.0069 | 0.2049  | 0.1157  | -0.1674 | -0.1632 | -0.3294 |
| PVX_079975 | -0.5046 | -0.4455 | 0.2465  | 0.6305  | 0.5491  | 0.1322  | -0.1708 | -0.2993 | -0.2241 |
| PVX_093565 | 0.3207  | 0.4698  | 0.475   | 0.3596  | 0.3921  | 0.0124  | 0.4813  | 0.8104  | 0.7057  |
| PVX_118490 | -0.4005 | -0.6258 | -0.3281 | -0.3899 | -0.141  | 0.6836  | 0.9256  | 0.1493  | -0.0583 |
| PVX_124015 | -0.5253 | -0.4563 | -0.7197 | -1.0642 | -0.4247 | -0.061  | 0.6666  | 0.7935  | 0.4667  |
| PVX_082790 | -0.3769 | 0.1986  | 0.22    | 0.2724  | 0.2552  | 0.3482  | -0.3791 | -0.5106 | -0.4914 |
| PVX_081770 | 0.7642  | 0.6651  | 0.4775  | 0.4703  | 0.326   | -0.1018 | -0.3011 | -0.39   | -0.3678 |
| PVX_117375 | 0.3442  | 0.2277  | 0.3525  | 0.4234  | 0.4379  | 0.6101  | 0.3512  | -0.0245 | -0.1327 |
| PVX_116860 | 0.1053  | 0.3924  | 0.2406  | 0.3271  | 0.2882  | -0.2074 | -0.3894 | -0.0877 | 0.0509  |
| PVX_092180 | 0.3598  | 0.1518  | -0.1445 | -0.6082 | -1.0468 | -1.0581 | -0.5971 | 0.3596  | 1.3013  |
| PVX_111080 | 0.3205  | 0.3594  | 0.2818  | 0.3195  | 0.3986  | 0.1418  | -0.2157 | -0.3659 | -0.4589 |
| PVX_092570 | 0.2114  | -0.1403 | -0.2088 | -0.0461 | 0.2308  | -0.4172 | -0.6277 | -0.4159 | -0.2915 |
| PVX_111465 | -0.2149 | -0.5879 | -0.985  | -1.4948 | -1.7836 | -2.0411 | -1.7291 | 0.8222  | 1.4394  |
| PVX_119475 | 0.239   | 0.465   | 0.3524  | 0.386   | 0.1484  | 0.1775  | -0.6883 | -1.0168 | -1.1006 |
| PVX_088020 | -0.0332 | -0.1513 | -0.0996 | -0.0778 | 0.0466  | -0.0704 | -0.2369 | -0.0682 | -0.1413 |
| PVX_088930 | -0.7862 | 0.3021  | 0.5781  | 0.5924  | 0.5703  | 0.3535  | -0.2547 | -0.5166 | -0.3791 |
| PVX_122680 | -0.2831 | 0.2222  | 0.3196  | 0.515   | 0.9132  | 0.5116  | -0.3676 | -0.5899 | -0.3796 |
| PVX_123735 | -0.3072 | -0.241  | -0.2764 | -0.2844 | -0.0904 | 0.0797  | -0.237  | -0.3769 | -0.3425 |
| PVX_084405 | 0.3406  | 0.1633  | -0.176  | -0.3514 | -0.5307 | -0.2019 | -0.4332 | -0.1989 | 0.4865  |
| PVX_080155 | -0.1863 | -0.3666 | -0.3855 | -0.1942 | 0.7328  | 0.6168  | 0.04    | 0.268   | 0.2594  |
| PVX_089620 | -0.8357 | -0.1248 | 0.3463  | 0.2925  | -0.0228 | -0.2103 | -0.7384 | -0.7863 | -0.8681 |
| PVX_100980 | 0.4365  | 0.6621  | 0.5663  | 0.3892  | 0.2613  | -0.1631 | -0.5341 | -0.4665 | -0.4566 |
| PVX_116600 | -0.1951 | -0.132  | -0.0364 | 0.1611  | -0.0822 | 0.4677  | 0.3714  | -0.0005 | -0.0053 |
| PVX_114450 | 0.3287  | -0.3112 | 0.0864  | 0.5845  | 0.963   | 0.2876  | -0.1845 | 0.0494  | 0.1512  |
| PVX_080660 | 0.2153  | 0.004   | 0.006   | 0.0307  | 0.1275  | 0.2044  | 0.2924  | -0.0022 | -0.3944 |
| PVX_115045 | -0.1299 | -0.1613 | 0.0243  | 0.1549  | 0.3984  | 0.2274  | 0.2074  | 0.1239  | 0.2799  |
| PVX_092785 | 1.0661  | 0.1574  | -0.2211 | -0.5622 | -0.2804 | -0.2014 | 0.288   | 0.8336  | 1.2829  |
| PVX_089185 | 0.0572  | 0.2307  | -0.2698 | -0.8145 | -0.8863 | -0.9932 | -0.7964 | -0.124  | 0.5677  |
| PVX_114230 | -0.3998 | -0.4714 | -0.0186 | 0.3427  | 0.5166  | 0.5504  | 0.2629  | 0.2137  | 0.1154  |
| PVX_092875 | -0.7882 | -0.0632 | 0.1129  | 0.2322  | 0.364   | 0.5401  | 0.3267  | -0.4384 | -0.5548 |
| PVX_119780 | -1.1437 | -1.0269 | 0.0488  | 0.7702  | 0.1349  | 0.4905  | -0.0986 | -0.3663 | -0.4998 |
| PVX_082535 | 0.6589  | 0.3704  | 0.445   | 0.6567  | 0.3541  | 0.0954  | 0.5317  | 0.6088  | 0.5466  |
| PVX_081520 | 0.5405  | 0.5104  | -0.2888 | -0.2807 | 0.0134  | -0.0492 | 0.1846  | 0.8248  | 0.9171  |
| PVX_087070 | -0.2593 | 0.3672  | 0.4616  | 0.5254  | 0.6025  | -0.1575 | -0.8407 | -0.8742 | -0.9452 |
| PVX_085970 | -0.0445 | -0.5617 | -0.6949 | -0.4053 | -0.4771 | 0.3772  | -0.3402 | -0.2709 | -0.095  |
| PVX_085715 | 0.0708  | 0.3045  | 0.293   | 0.4047  | 0.0849  | 0.0839  | -0.2112 | -0.3922 | -0.1462 |
| PVX_093575 | 0.186   | 0.1051  | 0.2148  | 0.0224  | 0.5004  | 0.4145  | 0.2684  | -0.0022 | 0.0848  |
| PVX_111435 | -0.4871 | -0.0322 | 0.0307  | 0.0159  | -0.0157 | -0.3956 | -0.0172 | -0.0757 | -0.3155 |
| PVX_091355 | -0.5855 | -0.5794 | -0.5905 | -0.5931 | -0.456  | -0.1416 | 0.6441  | 0.3105  | -0.242  |
| PVX_092075 | -1.7267 | -0.6308 | -0.2629 | 0.3383  | 0.594   | 1.1976  | -0.1302 | -0.8422 | -1.1066 |
| PVX_094710 | -0.006  | -0.2025 | -0.297  | -0.216  | 0.4963  | 0.536   | 0.0999  | 0.2409  | 0.4269  |
| PVX_111000 | 0.1754  | 0.3245  | 0.3463  | 0.0805  | -0.0187 | -0.1517 | 0.1079  | 0.1694  | 0.0213  |
| PVX_001975 | -0.4761 | -0.06   | -0.0891 | 0.2945  | 0.56    | 0.5729  | -0.4527 | -1.2259 | -1.3319 |
| PVX_094880 | -0.4204 | -0.223  | -0.0725 | 0.1351  | 0.3898  | -0.2322 | 0.139   | 0.1786  | 0.2005  |
| PVX_010610 | -0.321  | -0.3467 | -0.4306 | -0.5447 | -1.016  | -1.0214 | -1.0369 | -0.7775 | -0.6168 |
| PVX_079840 | 0.4893  | 0.4807  | 0.5727  | 0.5589  | 0.5633  | 0       | -0.847  | -1.0695 | -0.8851 |
| PVX_099135 | 1.0621  | 0.8435  | 0.8347  | 0.6294  | 0.0792  | -1.0967 | -0.8525 | -0.448  | -0.2999 |
| PVX_002870 | -0.4378 | -0.5256 | -0.1045 | 0.3502  | 0.373   | -0.1529 | -0.3172 | -0.3958 | -0.3687 |
| PVX_082660 | -1.0624 | -1.1448 | -1.1668 | -0.0543 | 0.9743  | 0.606   | 0.3453  | -0.0914 | -0.3804 |

|            |         |         |         |         |         |         |         |         |         |
|------------|---------|---------|---------|---------|---------|---------|---------|---------|---------|
| PVX_088995 | 0.7021  | 0.4912  | 0.2673  | 0.1058  | 0.2914  | 0.1578  | 0.061   | -0.3191 | -0.2614 |
| PVX_089765 | -0.9194 | -0.1916 | -0.5069 | -0.8091 | -1.1173 | -1.5878 | -1.6534 | 0.8103  | 1.3502  |
| PVX_001930 | -0.8453 | -0.0182 | 0.1051  | 0.2275  | 0.5263  | 0.7462  | -0.0305 | -0.7657 | -1.0502 |
| PVX_097970 | 0.2616  | 0.3765  | 0.2087  | 0.2216  | 0.2417  | 0.1474  | 0.0823  | -0.353  | -0.5039 |
| PVX_003720 | 0.1082  | 0.3239  | 0.3419  | 0.339   | 0.2086  | 0.0302  | -0.4094 | -0.5447 | -0.2256 |
| PVX_090000 | 0.1081  | -0.0413 | 0.0663  | 0.4919  | 0.2862  | 0.115   | -1.252  | -1.7659 | -1.5442 |
| PVX_087165 | 0.8303  | 0.0245  | -0.1029 | -0.5202 | -0.8078 | -0.7214 | -0.4932 | 0.371   | 1.3027  |
| PVX_089250 | 0.2181  | 0.6616  | 0.6896  | 0.6647  | 0.5981  | -0.2285 | -0.7238 | -0.8875 | -0.7135 |
| PVX_083085 | -0.2037 | -0.3173 | -0.4838 | -0.4921 | -0.481  | 0.3036  | 0.6455  | 0.4359  | 0.0266  |
| PVX_003675 | 0.0069  | -0.06   | -0.0627 | -0.0482 | -0.1455 | -0.1549 | -0.0455 | -0.0304 | -0.1251 |
| PVX_001040 | -0.079  | -0.2763 | -0.1801 | -0.4278 | -0.2236 | -0.0638 | 0.705   | 0.8111  | 0.406   |
| PVX_121900 | 1.271   | 1.1212  | 0.7213  | 0.5211  | -0.0612 | -1.097  | -1.1956 | -0.4616 | 0.0281  |
| PVX_116745 | -0.1775 | -0.3564 | -0.2915 | -0.3085 | -0.2259 | 0.1615  | 0.5207  | 0.4649  | 0.3452  |
| PVX_123265 | -0.045  | 0.074   | 0.2591  | 0.4016  | 0.4866  | 0.3882  | 0.3441  | 0.1432  | -0.0488 |
| PVX_003600 | -0.1171 | 0.2325  | 0.3528  | 0.5503  | 0.7291  | 0.3807  | 0.0213  | -0.0031 | 0.0811  |
| PVX_091185 | -0.5136 | -0.6306 | -0.7128 | -0.8648 | -0.6863 | -0.2068 | -0.1022 | -0.5785 | -0.8757 |
| PVX_094415 | 1.1057  | 0.2795  | 0.5077  | 0.1299  | 0.8985  | 0.0408  | -1.1707 | -1.3811 | -0.7469 |
| PVX_123475 | 0.2353  | -0.0938 | -0.3169 | -0.3452 | -0.2089 | -0.0788 | 0.2766  | -0.0837 | -0.2704 |
| PVX_092030 | 0.1246  | 0.4869  | 0.4812  | 0.4815  | 0.5955  | 0.7452  | -0.0658 | -0.717  | -0.9591 |
| PVX_117270 | -1.5437 | -1.3466 | -1.5838 | -1.8049 | -1.9173 | -1.5062 | 1.216   | 1.1847  | 0.2756  |
| PVX_100525 | 0.6703  | 0.5943  | 0.1495  | -0.1873 | -0.0507 | -0.0895 | -0.1143 | -0.011  | 0.3114  |
| PVX_091690 | -0.1544 | -0.2034 | -0.5189 | -0.4377 | -0.3122 | 0.3932  | 1.0202  | 0.7151  | 0.5584  |
| PVX_082495 | 0.412   | 0.5131  | 0.2755  | 0.2263  | 0.3622  | 0.3875  | -0.1529 | -0.2917 | -0.0525 |
| PVX_117035 | 0.4848  | 0.1969  | 0.378   | 0.3709  | 0.0253  | 0.0791  | 0.2252  | 0.1871  | 0.1689  |
| PVX_003970 | -1.7046 | -1.5219 | -0.662  | 0.4582  | 1.0265  | 0.4772  | -0.6005 | -1.2226 | -1.377  |
| PVX_114780 | 0.3698  | 0.1665  | -0.0214 | -0.5078 | -0.3776 | -0.8292 | -0.5849 | 0.055   | 0.7832  |
| PVX_115410 | -0.1975 | -0.3218 | -0.0995 | 0.548   | 0.6371  | 0.8211  | 0.3568  | 0.1311  | -0.0704 |
| PVX_085220 | -0.6063 | -0.0926 | -0.1658 | -0.1685 | -0.1642 | -0.7692 | -0.4627 | -0.2558 | -0.8979 |
| PVX_085570 | -0.2186 | 0.0826  | 0.2964  | 0.3116  | 0.4317  | 0.4488  | 0.1123  | -0.6013 | -0.3527 |
| PVX_098705 | 0.1047  | 0.0258  | -0.1024 | -0.1245 | -0.2197 | 0.0956  | 0.0786  | 0.1291  | 0.1454  |
| PVX_097570 | -0.9654 | -1.5508 | -1.68   | -1.458  | -1.5105 | -1.5103 | -1.4389 | 0.8174  | 0.7915  |
| PVX_000570 | -0.154  | -2.1763 | 0.1293  | 0.0106  | -0.2701 | -0.075  | 0.5078  | 0.7344  | 0.4327  |
| PVX_080175 | -0.3756 | 0.2996  | 0.5665  | 0.4783  | 0.5194  | 0.3019  | -0.1693 | -0.3302 | -0.3246 |
| PVX_113285 | -0.1498 | 0.6672  | 0.9133  | 0.9569  | 0.8366  | 0.3937  | -0.1363 | -0.3992 | 0.0233  |
| PVX_102640 | -0.6306 | -0.2771 | 0.6998  | 0.7002  | 0.2101  | -0.564  | -0.5241 | 0.1042  | 0.1182  |
| PVX_087950 | -0.7351 | -0.1312 | 0.1466  | 0.2715  | 0.3512  | 0.5901  | -0.9738 | -1.5139 | -1.3867 |
| PVX_018150 | 0.5911  | 1.0072  | 0.6253  | 0.7721  | 0.5197  | -0.0627 | -0.1598 | -0.1988 | -0.4841 |
| PVX_084445 | 0.3342  | -0.3165 | -0.1507 | -0.3258 | -0.0557 | 0.4462  | 0.1566  | 0.5659  | 0.66    |
| PVX_116845 | -0.2275 | -0.1817 | 0.0794  | 0.3827  | 0.5829  | 0.4979  | 0.2035  | 0.1122  | -0.2803 |
| PVX_079795 | -0.588  | 0.0632  | 0.3229  | 0.4623  | 0.1498  | -0.1699 | -0.3582 | -0.2344 | -0.5866 |
| PVX_111060 | 0.1899  | -0.2678 | 0.1394  | 0.4833  | 0.5376  | 0.0841  | 0.0135  | 0.2849  | 0.4141  |
| PVX_083310 | -0.5132 | -0.1165 | -0.0882 | 0.061   | 0.1893  | 0.0803  | 0.2574  | 0.1806  | -0.2747 |
| PVX_117445 | -0.4045 | -0.5807 | 0.0343  | 0.0045  | 0.4659  | -0.0272 | -0.0041 | 0.3443  | -0.0854 |
| PVX_001015 | 0.8359  | 0.2186  | -0.22   | -0.1894 | -0.6481 | -0.7331 | 0.1394  | 0.8314  | 1.2793  |
| PVX_003625 | 0.0328  | -0.0835 | -0.3399 | -0.0225 | 0.0452  | -0.4892 | -0.3665 | 0.2276  | 0.512   |
| PVX_114475 | 0.8831  | 0.9071  | 0.6228  | 0.5406  | 0.1824  | -0.1632 | -0.0686 | -0.0943 | 0.3081  |
| PVX_096940 | 0.3069  | 0.0525  | 0.3088  | -0.0165 | -0.1345 | 0.0529  | 0.2164  | 0.2706  | 0.1733  |
| PVX_094370 | -0.1323 | -0.4502 | -0.7018 | -0.7584 | -1.0763 | -0.528  | 1.1054  | 1.2138  | 0.7836  |
| PVX_087855 | 0.0369  | -0.3138 | -0.4725 | -0.4379 | -0.4508 | -0.6609 | -0.3026 | 0.2154  | -0.241  |
| PVX_086205 | 0.6391  | -0.1507 | -0.4181 | -0.4524 | -0.3725 | -0.1563 | 0.1866  | 0.8544  | 1.0829  |
| PVX_101110 | -0.4228 | -0.1739 | 0.0179  | 0.2425  | 0.4693  | 0.2004  | -0.5131 | -1.0017 | -1.0774 |
| PVX_098690 | -0.7561 | -0.3281 | 0.3052  | 0.5787  | 0.3889  | 0.5253  | 0.0004  | -0.555  | -0.7035 |
| PVX_088880 | -1.8919 | -1.3088 | -0.6212 | 0       | 0.4219  | 0.8379  | -0.0412 | -1.0664 | -1.2671 |
| PVX_119415 | 0.4161  | -0.3606 | -0.2278 | -0.1307 | 0.0214  | 0.1169  | 0.1655  | 0.5495  | 0.575   |
| PVX_080540 | 0.341   | 0.0346  | 0.3775  | 0.7024  | 0.4481  | 0.1942  | 0.3465  | 0.6979  | 0.6969  |
| PVX_094940 | 0.4678  | -0.2245 | -0.2366 | -0.1847 | -0.37   | 0.0671  | -0.1034 | 0.0916  | 0.5971  |
| PVX_086085 | -0.2756 | 0.0146  | 0.4815  | 0.6121  | 0.4149  | 0.377   | 0.6492  | 0.6082  | 0.2216  |
| PVX_119495 | -0.5539 | -0.8116 | -0.7588 | -0.1616 | 0.3288  | 0.5212  | 0.1015  | -0.296  | -0.2733 |
| PVX_080490 | 0.4759  | 0.6585  | 0.4629  | 0.4634  | 0.6196  | 0.2568  | 0.0387  | 0.3706  | 0.4514  |
| PVX_092295 | 0.0031  | -0.2033 | 0.0492  | 0.1791  | 0.0998  | -0.0022 | -0.2353 | 0.0559  | 0.1409  |
| PVX_088000 | -0.075  | -0.4765 | -0.2769 | -0.0533 | 0.0204  | -0.1169 | -0.0843 | -0.2222 | -0.1708 |
| PVX_114395 | 0.1321  | 0.5572  | 0.4065  | 0.1453  | 0.2119  | 0.727   | 0.0201  | -0.1711 | -0.2888 |
| PVX_088005 | -0.1338 | -0.0767 | 0.0432  | 0.1785  | 0.2016  | 0.4625  | 0.2158  | 0.3601  | 0.3903  |

|            |         |         |         |         |         |         |         |         |         |
|------------|---------|---------|---------|---------|---------|---------|---------|---------|---------|
| PVX_114365 | 0.3613  | -0.2806 | -0.0821 | -0.3351 | -0.1869 | -0.1478 | -0.3345 | -0.0116 | 0.7849  |
| PVX_082645 | 0.5266  | 0.7301  | 0.7572  | 0.6932  | 0.7339  | 1.1529  | -0.085  | -0.9511 | -0.8579 |
| PVX_116915 | -0.3343 | -0.0967 | -0.1267 | -0.0415 | -0.3242 | -0.4231 | -0.6755 | 0.3964  | 0.3491  |
| PVX_080385 | 0.4997  | 0.5632  | 0.5953  | 0.4164  | 0.3786  | 0.3019  | -0.6105 | -0.8857 | -0.7519 |
| PVX_087135 | -0.7768 | 0.0937  | 0.5333  | 0.3883  | 0.2728  | 0.3216  | 0.0298  | -0.2712 | -0.4162 |
| PVX_084295 | -0.4982 | -0.08   | -0.025  | -0.0023 | 0.1065  | 0.1412  | -0.3249 | -0.269  | -0.2533 |
| PVX_082855 | 0.7521  | 0.46    | 0.5405  | 0.7865  | 1.1447  | 0.6194  | 0.1313  | 0.0156  | -0.0973 |
| PVX_123925 | 0.1323  | 0.4799  | 0.6394  | 0.7183  | 0.7025  | 0.4252  | 0.3951  | 0.3647  | 0.0257  |
| PVX_094315 | 0.5692  | 0.4506  | 0.3207  | 0.1491  | 0.3601  | 0.2041  | -0.5875 | -1.1256 | -1.0152 |
| PVX_113945 | -0.3572 | -0.6452 | -0.5479 | -0.4131 | -0.219  | 0.2546  | 0.6587  | 0.4714  | 0.2776  |
| PVX_005055 | 0.935   | 0.0569  | -0.2532 | -0.0041 | 0.1439  | 0.703   | -0.0181 | -0.2811 | -0.0973 |
| PVX_113275 | 0.3088  | 0.156   | 0.273   | 0.3403  | 0.0744  | 0.2237  | -0.0841 | 0.4046  | 0.8952  |
| PVX_091205 | 0.0116  | -0.1799 | -0.1331 | 0.0129  | 0.3695  | -0.0846 | -0.4339 | 0.0384  | 0.4406  |
| PVX_098585 | -1.5971 | -1.7427 | -1.9059 | -2.0376 | -2.0186 | -2.0637 | -0.2858 | 1.3219  | 1.1423  |
| PVX_101080 | -0.4162 | -0.1479 | 0.2249  | 0.0543  | -0.3753 | -0.0279 | 0.5546  | 0.863   | 0.6459  |
| PVX_002925 | -0.8621 | -0.3718 | -0.2336 | -0.2659 | 0.3276  | 0.266   | -0.0762 | -0.7757 | -0.6281 |
| PVX_001075 | 0.0996  | 0.0054  | -0.3754 | -0.3921 | -0.6592 | -0.4756 | 0.2737  | 0.6811  | 0.6125  |
| PVX_093640 | 1.2689  | 0.755   | 0.695   | 0.4138  | 0.2484  | 0.5593  | 0.0808  | -0.0444 | 0.111   |
| PVX_118105 | 0.1946  | -0.0123 | -0.117  | -0.3586 | 0.0308  | -0.0487 | 0.0127  | 0.1625  | 0.4726  |
| PVX_123095 | 0.5654  | 0.8635  | 0.6246  | 0.4459  | 0.1456  | -0.252  | -0.9664 | -0.7661 | -0.1959 |
| PVX_085685 | -0.9373 | -0.0845 | 0.6604  | 1.0228  | 0.5781  | -0.5628 | -0.9644 | -0.8853 | -0.4677 |
| PVX_100950 | -0.0318 | 0.4209  | 0.5154  | 0.5081  | 0.4958  | 0.5906  | 0.2079  | -0.0055 | -0.0884 |
| PVX_090925 | -0.2266 | -0.5707 | -0.7863 | -1.0291 | -0.8179 | -0.3867 | 0.5808  | 1.1231  | 0.6842  |
| PVX_091345 | -0.0322 | -0.1873 | -0.153  | -0.0506 | -0.0857 | -0.1739 | 0.1051  | 0.1131  | 0.0878  |
| PVX_094505 | 0.8355  | 0.6263  | 0.6562  | 0.7305  | 0.6074  | 0.0497  | -0.861  | -1.0934 | -0.6883 |
| PVX_101160 | -0.9083 | 0.2524  | 0.5655  | 0.8834  | 0.7332  | -0.3839 | -0.7096 | -0.7557 | -0.8691 |
| PVX_111445 | -1.2015 | -0.4468 | -0.3467 | -0.2238 | 0.0084  | 0.158   | -0.0752 | -0.7292 | -1.073  |
| PVX_115190 | -0.2453 | -0.2879 | -0.291  | -0.3421 | -0.2662 | 0.2623  | 0.0452  | -0.3059 | -0.2944 |
| PVX_116960 | -0.1479 | 0.3868  | 0.5836  | 0.6594  | 0.3102  | -0.0846 | -0.3316 | -0.4118 | -0.3106 |
| PVX_113325 | 0.205   | 0.7036  | 0.8604  | 0.8118  | 0.8145  | 0.0733  | -0.2192 | -0.3089 | -0.2996 |
| PVX_101010 | 0.3609  | 0.8038  | 0.6744  | 0.468   | 0.5107  | -0.1973 | -0.6316 | -0.697  | -0.543  |
| PVX_100650 | 0.169   | 0.375   | 0.4057  | 0.3294  | 0.4856  | 0.4415  | 0.4169  | 0.1412  | 0.1508  |
| PVX_110305 | -0.1821 | -0.3656 | -0.3301 | -0.4217 | -0.5309 | -0.4794 | -0.3641 | -0.1403 | -0.1676 |
| PVX_123110 | 0.9991  | 0.7741  | 0.6605  | 0.5916  | -0.3051 | -1.1283 | -1.402  | -0.6711 | -0.3267 |
| PVX_080390 | 0.8595  | -0.0499 | -0.2456 | -0.4137 | -0.2166 | -0.3974 | -0.2996 | -0.1057 | -0.1864 |
| PVX_091730 | 0.4277  | 0.8055  | 0.7112  | 0.4481  | -0.3234 | -0.7457 | -0.8476 | -0.8106 | -0.3349 |
| PVX_117175 | 0.7724  | 0.0606  | -0.0953 | -0.2294 | -0.3069 | -0.1602 | 0.4792  | 0.7354  | 1.0112  |
| PVX_122860 | 0.5323  | 0.0761  | -0.2098 | -0.6724 | -0.903  | -1.1177 | -0.5443 | 0.46    | 1.3699  |
| PVX_091535 | 0.4155  | 0.2025  | -0.0765 | -0.2797 | -0.3774 | -0.1517 | -0.0239 | -0.2352 | -0.6182 |
| PVX_100640 | -0.5107 | -0.0687 | -0.0596 | 0.2238  | 0.7202  | 0.6421  | 0.3346  | -0.3071 | -0.2382 |
| PVX_101380 | 0.3825  | -0.0894 | -0.1103 | -0.2815 | -0.3016 | -0.5356 | 1.0415  | 1.29    | 0.7229  |
| PVX_122170 | 0.3542  | 0.3329  | 0.5071  | 0.3926  | 0.2339  | -0.5414 | -0.6946 | 0.2934  | 0.6963  |
| PVX_090960 | -0.2    | 0.0247  | -0.0526 | -0.1134 | -0.4058 | -0.8242 | -0.6754 | 0.7445  | 0.7156  |
| PVX_001610 | 0.0329  | 0.1543  | 0.1048  | -0.0374 | 0.3287  | 0.6187  | 0.2006  | 0.1404  | 0.057   |
| PVX_101560 | -1.3111 | -1.331  | -1.5524 | -1.7016 | -1.9093 | -2.3419 | -2.6988 | -2.6095 | -2.2649 |
| PVX_123855 | -0.344  | -0.6877 | -0.9798 | -0.9149 | -0.2245 | 1.0337  | 0.8145  | 0.0213  | 0.0528  |
| PVX_096275 | -0.4922 | -0.1665 | -0.0763 | 0.0517  | 0.1833  | 0.4107  | -0.205  | -0.7424 | -0.6651 |
| PVX_080605 | 0.7088  | 1.1594  | 0.8302  | 0.3123  | -0.2036 | -0.9054 | -0.739  | -0.8935 | -0.8376 |
| PVX_085730 | 0.028   | 0.1045  | 0.0827  | 0.3285  | 0.1187  | -0.0711 | -0.4368 | -0.8377 | -0.436  |
| PVX_097845 | 0.4507  | 0.2093  | 0.3134  | 0.5069  | 0.7334  | 0.5791  | 0.5986  | 0.5746  | 0.4705  |
| PVX_099970 | 0.617   | -0.1632 | -0.2721 | -0.116  | -0.1532 | 0.2104  | 0.4706  | 0.6815  | 0.7365  |
| PVX_116970 | 1.007   | 0.4448  | 0.1362  | -0.2745 | -0.5906 | -0.7446 | 0.0509  | 0.9098  | 1.6355  |
| PVX_112640 | -0.9665 | -0.5252 | -0.4372 | -0.2572 | -0.118  | 0.8918  | 0.6455  | 0.1614  | -0.0525 |
| PVX_001025 | 0.0121  | -0.2345 | -0.227  | 0.0032  | -0.0382 | 0.1964  | 0.9462  | 0.5547  | 0.239   |
| PVX_115135 | -0.5987 | 0.3656  | 0.4888  | 0.5949  | 0.7008  | 0.2184  | -0.5781 | -0.8355 | -0.8386 |
| PVX_081465 | 0.1979  | 0.5992  | 0.5262  | 0.5342  | 0.3107  | 0.45    | 0.1686  | -0.3121 | -0.2742 |
| PVX_123355 | 0.2341  | 0.271   | 0.1974  | 0.2796  | 0.2397  | -0.0667 | 0.0411  | 0.3712  | 0.4531  |
| PVX_096280 | -1.3113 | -0.2548 | 0.1014  | 0.5246  | 0.8332  | 0.686   | -0.5687 | -1.2453 | -1.3979 |
| PVX_116555 | 0.798   | 0.1203  | -0.21   | -0.3864 | -0.4905 | -0.2817 | 0.251   | 0.6824  | 0.8867  |
| PVX_002830 | -0.0065 | 0.4029  | 0.4134  | 0.2439  | 0.4423  | 0.5557  | 0.198   | -0.3196 | -0.3949 |
| PVX_080565 | 0.3415  | 0.4109  | 0.2038  | 0.1685  | -0.0059 | 0.0013  | 0.2072  | -0.1643 | -0.2769 |
| PVX_124180 | 0.58    | 0.5268  | 0.6407  | 0.247   | 0.3726  | -0.2887 | -0.8422 | -1.0357 | -0.7284 |
| PVX_089840 | 0.3202  | 0.6286  | 0.942   | 0.589   | -0.4562 | -1.6578 | -1.703  | -1.1176 | -0.6233 |

|            |         |         |         |         |         |         |         |         |         |
|------------|---------|---------|---------|---------|---------|---------|---------|---------|---------|
| PVX_082985 | 0.2066  | -0.0665 | -0.3583 | -0.6296 | -0.9973 | -0.3419 | 0.099   | 0.597   | 1.0507  |
| PVX_097595 | -0.3462 | -0.8432 | -1.0326 | -0.5409 | 0.4776  | 0.8113  | 0.4151  | 0.2188  | 0.0429  |
| PVX_080635 | -0.4503 | -0.15   | 0.1175  | 0.276   | 0.3244  | 0.2746  | 0.1131  | -0.2457 | -0.4308 |
| PVX_090885 | 0.2161  | 0.462   | 0.4047  | 0.3575  | 0.0752  | 0.1952  | -0.3734 | -0.0051 | 0.1333  |
| PVX_115040 | 0.1823  | -0.082  | -0.1956 | 0.0187  | -0.0135 | -0.0907 | -0.2092 | -0.0676 | 0.5037  |
| PVX_118220 | 0.7296  | 0.6031  | 0.5474  | 0.5258  | 0.3962  | 0.2597  | -0.1068 | 0.1486  | 0.115   |
| PVX_095385 | -0.2859 | 0.1215  | 0.0134  | -0.2159 | -0.1813 | -0.2418 | 0.1452  | 0.5571  | 0.2627  |
| PVX_085660 | 0.8338  | 0.6162  | 0.5449  | 0.492   | 0.277   | 0.4296  | -0.0311 | -0.371  | -0.317  |
| PVX_113245 | 0.4064  | 0.5378  | 0.0968  | -0.0037 | -0.2934 | -0.8608 | -1.4236 | -1.1305 | -0.6856 |
| PVX_114835 | -0.2965 | -0.4393 | 0.1352  | 0.283   | 0.5838  | 0.7947  | 0.285   | -0.3438 | -0.4183 |
| PVX_081235 | -0.9908 | -0.9721 | -1.117  | -0.8269 | -0.5628 | 0.8327  | 0.4219  | -0.0039 | 0.0303  |
| PVX_085530 | -1.1449 | -1.3393 | -1.1604 | -0.6554 | -0.4518 | 0.9012  | 1.0161  | 0.0742  | -0.3798 |
| PVX_089900 | -0.09   | 0.1371  | 0.2266  | 0.229   | -0.2161 | 0.2276  | 0.3536  | -0.2218 | -0.5595 |
| PVX_002645 | -0.0423 | -0.0352 | 0.3045  | 0.0789  | -0.0385 | 0.0644  | -0.3253 | -0.1568 | -0.1966 |
| PVX_091405 | -0.4374 | -0.6862 | -1.2598 | -1.5177 | -0.9685 | 0.8382  | 1.1421  | 0.0849  | -0.3056 |
| PVX_091170 | 0.1476  | -0.0373 | 0.2546  | 0.1806  | 0.2539  | -0.3187 | -0.908  | -1.3307 | -0.8961 |
| PVX_122510 | -0.2852 | -0.0611 | 0.1579  | 0.4761  | 0.3925  | 0.0295  | -0.0897 | -0.1937 | -0.2776 |
| PVX_123175 | -0.4209 | -0.2952 | -0.0609 | -0.3873 | 0.0743  | 0.371   | 0.0692  | 0.0122  | -0.007  |
| PVX_121925 | -1.0244 | -1.4123 | -2.3197 | -2.864  | -3.2583 | -2.8634 | -2.2662 | 1.1675  | 1.5385  |
| PVX_101485 | -2.5911 | -2.5425 | -2.836  | -2.9951 | -2.9935 | -0.4511 | 1.5599  | 1.1829  | -0.1737 |
| PVX_110830 | -0.6584 | -0.3939 | -0.2284 | -0.0108 | -0.1739 | -0.6196 | 0.36    | 0.4416  | 0.2924  |
| PVX_001670 | 0.4844  | 0.6133  | 0.3048  | 0.1307  | -0.3849 | -0.4115 | -0.3748 | -0.2599 | -0.3581 |
| PVX_098725 | 0.2009  | 0.0028  | 0.007   | -0.0587 | 0.2564  | 0.2794  | 0.4375  | 0.5061  | 0.8759  |
| PVX_101205 | -0.8552 | -0.7127 | -1.1004 | -1.0739 | -0.057  | 0.511   | 0.3328  | 0.133   | 0.1346  |
| PVX_101575 | 1.2174  | 0.7155  | 0.6332  | 0.4505  | 0.0094  | -0.903  | -1.2781 | -1.0643 | -0.3006 |
| PVX_108255 | 1.4101  | 1.0936  | 0.8667  | 0.2279  | 0.7218  | 0.8634  | 0.4952  | 0.3262  | 0.4995  |
| PVX_101440 | 0.5238  | 0.241   | 0.205   | 0.262   | 0.3571  | 0.4702  | 0.2903  | 0.0475  | -0.1092 |
| PVX_115450 | 0.5846  | 0.7445  | 0.1799  | 0.1398  | -0.3569 | -0.9151 | -1.4408 | -1.1327 | -0.6922 |
| PVX_086915 | -1.7073 | -2.194  | -2.4875 | -2.9403 | -2.6657 | 0.3111  | 1.1327  | 0.2972  | -0.2705 |
| PVX_084225 | -0.2523 | 0.0664  | 0.1536  | 0.2327  | 0.2271  | -0.3687 | -0.8364 | -1.1016 | -0.4847 |
| PVX_002785 | -1.1425 | -0.6724 | -0.7738 | -0.9652 | -1.3306 | -1.2258 | -0.9775 | 0.9316  | 1.0418  |
| PVX_095220 | -0.0465 | 0.2108  | 0.4363  | 0.626   | 0.3512  | 0.0561  | -0.6824 | -0.7916 | -0.8059 |
| PVX_114495 | -0.1538 | 0.1507  | 0.326   | 0.2919  | 0.2625  | 0.2737  | 0.1128  | -0.2014 | -0.0822 |
| PVX_123760 | 0.0159  | -0.3222 | -0.443  | -0.4445 | 0.0076  | 0.191   | 0.9511  | 0.6032  | -0.0238 |
| PVX_119770 | -0.2131 | -0.0786 | 0.3596  | 0.6792  | 0.6434  | -0.0153 | -0.6386 | -0.662  | -0.4514 |
| PVX_082770 | 0.951   | 0.7736  | 0.5258  | 0.5525  | 0.4443  | -0.2206 | -0.9219 | -0.8088 | -0.3101 |
| PVX_090140 | -0.3735 | -0.5682 | -0.3653 | -0.3511 | -0.0157 | 0.0278  | -0.0719 | -0.1923 | -0.349  |
| PVX_114600 | 0.7877  | 0.4031  | 0.096   | -0.3059 | -0.5252 | -0.5797 | -0.2604 | 0.4795  | 1.0269  |
| PVX_081230 | 0.0454  | 0.0298  | 0.2761  | 0.3651  | 0.4034  | 0.1616  | -0.6877 | -0.883  | -0.7318 |
| PVX_091630 | -0.2384 | 0.155   | 0.266   | 0.1725  | -0.1284 | -0.4334 | -0.2196 | 0.5089  | 0.0238  |
| PVX_003760 | 0.3719  | 0.4489  | 0.238   | 0.2481  | -0.0612 | -0.2678 | -0.5321 | -0.3683 | -0.1818 |
| PVX_003980 | -0.9439 | -1.0888 | -1.1079 | -0.8719 | -1.2077 | -1.2428 | 0.2437  | 1.2619  | 0.8231  |
| PVX_000730 | -0.7735 | 0.4762  | 0.7148  | 0.8525  | 0.7229  | -0.2872 | -1.2586 | -1.3368 | -1.4854 |
| PVX_124705 | -0.171  | -0.2681 | -0.254  | -0.1482 | -0.0584 | 0.0103  | -0.083  | -0.2464 | -0.1636 |
| PVX_086140 | 0.7871  | 0.4789  | 0.4094  | 0.2087  | 0.0545  | -0.3809 | -0.7437 | -0.8614 | -0.6834 |
| PVX_080485 | -0.5407 | -0.1291 | 0.3501  | 0.1822  | 0.3619  | 0.2596  | -0.3182 | -0.544  | -0.1685 |
| PVX_109275 | -0.267  | 1.0225  | 1.2677  | 0.8575  | -0.0931 | -0.2775 | -0.3324 | -0.3541 | -0.1728 |
| PVX_104695 | 1.5962  | 1.5151  | 1.4213  | 1.4646  | 0.9592  | 0.9246  | 0.3535  | 0.244   | 0.5019  |
| PVX_002760 | 0.2414  | 0.0951  | -0.2009 | -0.3589 | -0.2657 | 0.1108  | 0.3581  | -0.1319 | 0.0325  |
| PVX_115310 | -0.6873 | -0.2811 | 0.0091  | 0.4859  | 0.3691  | 0.4995  | -0.2556 | -0.3241 | -0.5896 |
| PVX_122705 | 0.6709  | 0.6609  | 0.6374  | 0.34    | -0.1374 | -0.6538 | -0.9005 | -0.6324 | -0.2049 |
| PVX_111140 | -0.2961 | -0.6477 | -0.8643 | -0.7691 | -0.3202 | 0.4823  | 0.4519  | 0.0622  | 0.1809  |
| PVX_082810 | -0.1491 | -0.7278 | -0.9604 | -0.9422 | -0.0291 | 0.1207  | 0.7162  | 0.6846  | 0.5901  |
| PVX_095290 | 0.2589  | -0.0047 | -0.2147 | -0.3528 | -0.431  | -0.126  | 0.3357  | -0.1161 | -0.4409 |
| PVX_117455 | 0.6083  | 0.8723  | 0.7686  | 0.5436  | -0.204  | -0.8923 | -0.6366 | 0.4409  | 0.6089  |
| PVX_080650 | -0.6853 | -0.566  | -0.7722 | -0.7062 | -0.5937 | -0.5018 | -0.1039 | 0.097   | -0.3102 |
| PVX_123595 | 0.1325  | 0.0604  | 0.0773  | 0.3143  | -0.0032 | -0.2943 | 0.2197  | 0.6427  | 0.5459  |
| PVX_088065 | 0.1089  | 0.2704  | 0.1469  | 0.1635  | 0.2085  | -0.1186 | -0.902  | -1.6028 | -1.5319 |
| PVX_091925 | 0.3483  | 0.536   | 0.5477  | 0.4261  | 0.5846  | 0.1585  | -0.695  | -1.2318 | -1.2456 |
| PVX_114210 | 0.1348  | 0.1749  | 0.2458  | 0.4346  | 0.4761  | 0.3416  | -0.3588 | -0.6003 | -0.7918 |
| PVX_089365 | -0.8447 | 0.0741  | 0.5087  | 0.4863  | 0.8513  | 0.8591  | 0.5559  | -0.1413 | -0.4249 |
| PVX_091485 | -1.1467 | -0.3385 | 0.163   | 0.591   | 0.5405  | 0.1371  | -0.684  | -0.8963 | -0.9776 |
| PVX_081245 | -0.7046 | -0.6175 | -0.0396 | 0.2412  | 0.7315  | 0.1591  | -0.2373 | -0.4653 | -0.216  |

|            |         |         |         |         |         |         |         |         |         |
|------------|---------|---------|---------|---------|---------|---------|---------|---------|---------|
| PVX_082940 | 0.6378  | 0.0879  | -0.3326 | -0.9414 | -1.1188 | -1.2447 | -0.6994 | 0.1924  | 1.311   |
| PVX_118410 | -0.1351 | 0.0155  | -0.0861 | 0.0132  | -0.0201 | -0.0723 | 0.9367  | 0.5134  | 0.0625  |
| PVX_086335 | 0.8304  | 0.1054  | -0.15   | -0.0577 | 0.0306  | 0.1875  | 0.4217  | 0.9792  | 1.3103  |
| PVX_123580 | 0.5149  | 0.8715  | 0.6631  | 0.6185  | 0.1507  | -0.3707 | -0.263  | 0.2449  | 0.5989  |
| PVX_082520 | -0.2142 | 0.4297  | 0.573   | 0.5027  | 0.1998  | -0.2473 | -0.9055 | -0.9045 | -0.9379 |
| PVX_085655 | 0.0213  | 0.4512  | 0.5812  | 0.4437  | 0.6183  | 0.2391  | 0.036   | 0.2168  | 0.269   |
| PVX_092135 | 0.5012  | 0.6381  | 0.6401  | 0.526   | 0.4337  | 0.3687  | 0.1306  | -0.1192 | -0.0462 |
| PVX_080420 | -0.0937 | 0.6242  | 0.7709  | 0.8963  | 0.6623  | -0.0032 | -0.4621 | -0.4694 | -0.3654 |
| PVX_122125 | 0.406   | 0.2473  | 0.0784  | -0.0599 | -0.1095 | -0.0559 | -0.0159 | 0.1989  | 0.6016  |
| PVX_096335 | -0.1804 | 0.072   | 0.081   | 0.1005  | 0.2727  | 0       | -0.6164 | -1.4685 | -1.5034 |
| PVX_098650 | -0.8017 | -0.2903 | 0.175   | 0.242   | 0.2546  | 0.342   | 0.0596  | -0.3616 | -0.4371 |
| PVX_094495 | 0.5052  | 0.4881  | 0.4342  | 0.095   | 0.0169  | 0.3288  | 0.1152  | 0.4301  | 0.9451  |
| PVX_085145 | -1.0862 | -0.77   | 0.1062  | 0.4442  | 0.6367  | 0.2638  | -0.4655 | -0.1454 | -0.2526 |
| PVX_112635 | 0.288   | 0.1779  | 0.3149  | 0.3317  | 0.4093  | 0.0921  | 0.1889  | 0.4946  | 0.4306  |
| PVX_100630 | 0.4813  | 0.4044  | 0.1705  | 0.0346  | 0.2424  | 0.0108  | -0.0961 | -0.0318 | 0.0702  |
| PVX_084925 | 0.7409  | 0.5978  | 0.6308  | 0.7848  | 0.6901  | 0.6469  | 0.5505  | 0.4305  | 0.374   |
| PVX_117665 | -0.3781 | -0.1735 | -0.1768 | 0.0184  | 0.0534  | 0.1833  | 0.0578  | -0.1656 | -0.5753 |
| PVX_122100 | 0.176   | 0.39    | 0.5173  | 0.4659  | 0.3622  | 0.0527  | -0.5716 | -0.6692 | -0.5552 |
| PVX_082630 | -0.2094 | -0.4166 | -0.5959 | -0.6235 | -0.2874 | 0.5299  | 0.3205  | 0.3029  | 0.4192  |
| PVX_119755 | -0.4587 | -0.3035 | 0.1143  | 0.2325  | 0.3707  | 0.0723  | 0.0061  | -0.0733 | -0.2339 |
| PVX_082420 | 0.4446  | 0.3516  | 0.2381  | 0.2051  | 0.2492  | -0.2405 | -0.1698 | 0.2192  | 0.3429  |
| PVX_114750 | 0.2196  | 0.1193  | 0.3353  | 0.401   | 0.3799  | 0.7646  | 0.2719  | 0.2152  | 0.3264  |
| PVX_079740 | 0.3913  | -0.0196 | 0.0652  | 0.138   | -0.0697 | 0.0561  | 0.2368  | 0.5844  | 0.7079  |
| PVX_095050 | 0.3112  | -0.0801 | -0.1857 | -0.0508 | 0.1633  | -0.2986 | -0.1401 | 0.2671  | 0.6328  |
| PVX_096130 | -0.3245 | -0.1162 | 0.2041  | 0.4271  | 0.5192  | 0.0225  | -0.0659 | 0.1085  | -0.307  |
| PVX_088075 | -0.1217 | 0.4356  | 0.3831  | 0.2198  | 0.0516  | 0.1136  | 0.0589  | -0.338  | -0.419  |
| PVX_114195 | 0.4944  | 0.9391  | 0.8641  | 0.8124  | 0.4975  | -0.3746 | -0.4968 | -0.6234 | -0.5346 |
| PVX_119265 | 0.8857  | 0.5453  | 0.4494  | 0.263   | -0.0557 | 0.0242  | 0.3181  | 0.0106  | 0.3063  |
| PVX_089005 | 1.0206  | 0.7804  | 0.4478  | -0.0812 | -0.3884 | -0.2066 | 0.1186  | 0.7037  | 1.1353  |
| PVX_119405 | -0.2121 | -0.6913 | -0.4211 | 0.0306  | 0.3972  | 1.1191  | 0.7609  | 0.2049  | 0.11    |
| PVX_087870 | 0.1762  | 0.8984  | 0.8212  | 1.1078  | 0.6831  | -0.046  | 0.2938  | 0.2704  | 0.3231  |
| PVX_088025 | 0.199   | 0.1567  | 0.3993  | 0.5457  | 0.6898  | 0.6329  | 0.5507  | 0.4726  | 0.4047  |
| PVX_099495 | -1.127  | -0.1798 | 0.5174  | 0.8049  | 0.8525  | 0.0177  | -0.6178 | -0.9966 | -0.863  |
| PVX_082840 | 0.6901  | 0.7257  | 0.7771  | 0.6488  | 0.4321  | 0.2426  | -0.1336 | -0.8627 | -0.8672 |
| PVX_090065 | -0.265  | -0.5391 | -0.3561 | -0.0767 | 0.3347  | 0.6972  | 0.6585  | 0.1591  | -0.0833 |
| PVX_096980 | 0.591   | 0.3882  | -0.1568 | -0.1966 | -0.5384 | 0.1429  | -0.2077 | -0.1719 | -0.1556 |
| PVX_114905 | -0.875  | -0.5297 | -0.6261 | -0.4191 | 0.1889  | 0.8242  | 0.2441  | -0.9169 | -1.4229 |
| PVX_123160 | -0.5721 | -0.5861 | 0.0773  | 0.4005  | 0.1736  | 0.1824  | -0.0909 | -0.3086 | -0.0395 |
| PVX_080105 | -0.6446 | -0.3245 | 0.2139  | 0.5389  | 0.4516  | 0.0432  | -0.0874 | -0.0024 | 0.01    |
| PVX_087005 | -0.6034 | -0.3763 | 0.0742  | 0.3283  | 0.482   | 0.3537  | 0.207   | -0.3265 | -0.5029 |
| PVX_080315 | -0.7105 | -0.5301 | -0.2464 | -0.0273 | 0.2845  | 0.3807  | 0.1495  | -0.4096 | -0.5159 |
| PVX_114050 | -0.6885 | -1.0575 | -1.623  | -1.1604 | 0.2973  | 0.5769  | -0.2738 | -0.4001 | -0.2033 |
| PVX_003825 | -1.9633 | -1.9802 | -2.2556 | -2.4175 | -2.3402 | -0.0514 | 1.1953  | 0.5389  | -0.2806 |
| PVX_087000 | 0.0061  | -0.3229 | -0.0614 | 0.6978  | 1.1253  | 0.7407  | 0.1655  | 0.2072  | 0.0517  |
| PVX_116580 | -0.0696 | -0.2121 | -0.1069 | -0.014  | -0.0541 | 0.2909  | 0.2887  | 0.1611  | 0.0705  |
| PVX_098835 | -0.2104 | -0.07   | 0.0184  | 0.0279  | 0.3516  | 0.3237  | 0.037   | -0.1691 | -0.6009 |
| PVX_084875 | 0.3878  | -0.2764 | -0.4007 | -0.3467 | 0.0835  | 0.0162  | 0.0542  | 0.3917  | 0.3734  |
| PVX_096120 | 0.4797  | -0.4347 | -0.9045 | -1.4307 | -1.4184 | -1.2007 | 0.3807  | 1.1479  | 1.0964  |
| PVX_123440 | 0.3828  | -0.0133 | 0.1002  | 0.0891  | 0.0392  | -0.3271 | 0.0947  | 0.6186  | 0.577   |
| PVX_099140 | 0.756   | 0.8368  | 0.6043  | 0.4558  | 0.4855  | -0.3884 | -0.1221 | -0.061  | -0.0852 |
| PVX_087945 | 0.3839  | 0.3472  | 0.2476  | 0.2075  | 0.3351  | 0.2797  | 0.2759  | 0.3011  | 0.2323  |
| PVX_118600 | 0.4155  | -0.122  | -0.1989 | -0.2781 | 0.0039  | 0.187   | 0.276   | 0.5839  | 0.9145  |
| PVX_001980 | 1.9271  | 1.1246  | 0.1095  | -0.5051 | -0.5464 | -0.5794 | -0.3442 | -0.1875 | 0.2363  |
| PVX_084775 | 0.6351  | 0.4971  | 0.2259  | -0.3658 | -0.5622 | -0.7403 | -0.3665 | 0.4042  | 1.1751  |
| PVX_099980 | -1.8047 | -1.814  | -2.0709 | -2.3304 | -2.1593 | -0.2934 | 1.5001  | 1.4302  | 0.6024  |
| PVX_116510 | -1.1066 | -0.3542 | -0.0235 | 0.2309  | 0.4845  | 0.6252  | 0.3809  | -0.1835 | -0.6903 |
| PVX_122060 | -0.408  | -0.2755 | -0.3454 | -0.3005 | 0.275   | 0.7818  | 0.3057  | 0.7275  | 0.4142  |
| PVX_090980 | -0.5226 | -0.3107 | 0.176   | 0.3805  | 0.5664  | 0.5368  | 0.1294  | -0.3907 | -0.4235 |
| PVX_101365 | -0.2788 | -0.465  | -0.8255 | -1.0638 | -0.5555 | 0.274   | 0.9732  | 0.5905  | 0.3609  |
| PVX_079810 | 0.9059  | 0.8426  | 0.6283  | 0.5129  | 0.0906  | 0.2606  | -0.4308 | -0.3085 | -0.212  |
| PVX_092695 | -0.3315 | -0.6919 | -0.9962 | -0.9937 | -0.8071 | -0.1521 | 0.8316  | 0.5129  | 0.3485  |
| PVX_002755 | 0.4946  | 0.3205  | 0.2668  | 0.2271  | 0.4598  | 0.4747  | -0.0535 | -0.3998 | -0.4726 |
| PVX_099875 | -0.1225 | 0.7546  | 0.6947  | 0.8343  | 0.5145  | -0.4947 | -0.3989 | 0.2761  | 0.0075  |

|            |         |         |         |         |         |         |         |         |         |
|------------|---------|---------|---------|---------|---------|---------|---------|---------|---------|
| PVX_002775 | 0.0839  | 0.1626  | 0.0783  | 0.0899  | 0.2244  | 0.1988  | 0.7394  | 0.6989  | 0.8758  |
| PVX_000660 | -0.2002 | -0.2958 | -0.0456 | 0.2347  | 0.1756  | 0.0791  | 0.1437  | -0.0035 | -0.2901 |
| PVX_107235 | 0.1114  | 0.2313  | 0.0753  | 0.1875  | -0.294  | -0.4654 | -0.9434 | -0.8769 | -0.523  |
| PVX_083005 | 0.1816  | -0.0978 | 0.2625  | 0.6081  | 0.4661  | 0.5583  | 0.1555  | 0.1187  | 0.3487  |
| PVX_003900 | 1.0943  | 0.4032  | 0.2835  | 0.2053  | 0.017   | -0.1315 | 0.2949  | 0.6925  | 0.8741  |
| PVX_123900 | 0.4122  | 0.1583  | 0.0583  | -0.0764 | 0.09    | 0.0901  | -0.2436 | -0.6824 | -0.8445 |
| PVX_084580 | 0.4912  | 0.2136  | 0.2078  | -0.3292 | -0.5126 | -0.2367 | 0.0485  | 0.335   | 0.8437  |
| PVX_100880 | 0.7283  | 0.1046  | -0.0942 | -0.605  | -0.7685 | -1.3082 | -0.2438 | 0.8912  | 1.4235  |
| PVX_086105 | 0.7733  | 0.1931  | 0.2479  | 0.1875  | -0.0874 | -0.2144 | 0.139   | 0.5966  | 0.806   |
| PVX_084400 | 0.9276  | 0.6916  | 0.3956  | -0.2062 | -0.4316 | -0.504  | -0.1955 | 0.4472  | 1.3087  |
| PVX_118015 | -0.6218 | -0.3644 | -0.3259 | -0.0235 | 0.014   | 0.67    | 0.4721  | 0.3096  | 0.0815  |
| PVX_094745 | 0.9163  | 0.2062  | -0.3925 | -0.6931 | -0.72   | -0.5466 | 0.0957  | 0.693   | 1.1378  |
| PVX_084505 | 0.3037  | -0.0546 | -0.0937 | -0.3693 | -0.6218 | -0.3027 | -0.0161 | 0.219   | 0.5268  |
| PVX_003895 | 0.2769  | 0.3445  | 0.1317  | 0.0286  | -0.3006 | 0.2897  | 0.2435  | -0.0454 | -0.0817 |
| PVX_096390 | -0.1614 | 0.1899  | 0.5499  | 0.7356  | 0.9008  | 0.4543  | -0.0871 | -0.1942 | -0.1508 |
| PVX_113305 | 0.3161  | 0.5637  | 0.5013  | 0.662   | 0.5988  | 0.4446  | 0.1519  | 0.0709  | 0.24    |
| PVX_003755 | 0.2759  | 0.0969  | 0.1027  | -0.2034 | 0.0808  | -0.1031 | 0.3646  | 0.4916  | 0.2737  |
| PVX_101140 | 0.4728  | 0.5349  | 0.434   | 0.4403  | 0.6294  | 0.3887  | 0.0803  | -0.0747 | -0.0521 |
| PVX_089265 | -0.2566 | -0.127  | 0.3813  | 0.5815  | 0.3797  | -0.1153 | -0.1154 | 0.1324  | 0.3922  |
| PVX_084955 | 0.1868  | 0.4674  | 0.5011  | 0.2597  | 0.3486  | 0.2123  | -0.2839 | -0.8801 | -0.9723 |
| PVX_095025 | 0.3668  | -0.6507 | -0.7643 | -0.6881 | -0.4757 | -0.7833 | 0.2055  | 0.8993  | 0.8453  |
| PVX_114980 | -0.3827 | -0.0607 | 0.303   | 0.31    | 0.3239  | -0.2251 | -0.158  | -0.1559 | -0.0345 |
| PVX_082480 | 0.968   | 0.4341  | 0.4566  | 0.4864  | 0.5068  | 0.1398  | -0.641  | -1.0794 | -0.7733 |
| PVX_085995 | -0.1118 | 0.0183  | 0.2417  | 0.4426  | 0.2558  | 0.5256  | -0.0564 | -0.3278 | 0.1559  |
| PVX_089210 | -0.3386 | 0.3958  | 0.5497  | 0.5692  | 0.5226  | -0.0306 | -0.1307 | 0.0837  | -0.0744 |
| PVX_099265 | 1.0396  | 0.8948  | 0.7594  | 0.6508  | 0.1087  | -0.3709 | -0.6033 | -0.0124 | 0.3413  |
| PVX_124030 | -0.7367 | -0.4623 | 0.1267  | 0.6125  | 0.9024  | 0.2874  | -0.103  | -0.2758 | -0.4237 |
| PVX_085795 | 0.6777  | 0.2192  | 0.2726  | 0.1872  | 0.0067  | 0.4431  | 0.4655  | 0.6597  | 0.614   |
| PVX_118575 | -0.5156 | -0.5439 | -0.4713 | -0.2725 | -0.1936 | 0.2217  | 0.5852  | 0.664   | 0.0895  |
| PVX_089825 | 1.0231  | 1.6533  | 1.2211  | 0.2855  | -0.4846 | -0.6714 | -0.5329 | -0.1524 | -0.0629 |
| PVX_086000 | 0.7393  | 0.3565  | 0.3382  | 0.489   | 0.4394  | 0.1534  | 0.1926  | 0.2748  | 0.3011  |
| PVX_110910 | 0.283   | 0.3007  | 0.1859  | 0.0014  | -0.1148 | -0.4116 | -0.1787 | 0.3069  | 0.8063  |
| PVX_103150 | 0.1176  | 0.4528  | 0.3765  | 0.2273  | 0.0358  | -0.6819 | -0.7536 | -0.7238 | -0.6521 |
| PVX_115125 | -0.5982 | -0.1626 | 0.0088  | 0.4253  | 0.67    | 0.5997  | 0.363   | -0.1385 | -0.2685 |
| PVX_113645 | -0.0743 | 0.3796  | 0.3213  | 0.5143  | 0.4861  | 0.0835  | -0.3073 | -0.3553 | -0.4002 |
| PVX_094235 | 0.3787  | 0.4803  | -0.3887 | -0.8885 | -1.0501 | 0.621   | 0.687   | 0.6801  | 1.1179  |
| PVX_098925 | 0.0348  | -0.268  | -0.3507 | -0.5557 | -0.9187 | 0.0447  | 0.608   | 0.6562  | 0.5478  |
| PVX_101320 | -0.0681 | -0.5284 | -0.0822 | 0.6083  | 1.006   | 0.9769  | 0.4413  | 0.2873  | 0.0979  |
| PVX_092420 | 0.4025  | 0.2861  | 0.0197  | -0.1748 | -0.4521 | -0.5483 | -0.313  | 0.0147  | 0.0769  |
| PVX_091270 | -1.0674 | -0.9022 | -0.217  | 0.2787  | 0.277   | 0.0377  | -0.7964 | -0.7129 | -0.4611 |
| PVX_116695 | -0.9845 | -0.5808 | -0.7045 | -0.9234 | -0.6644 | 0.5388  | 0.7295  | -0.0038 | -0.6071 |
| PVX_091175 | -0.2679 | -0.1252 | -0.1477 | -0.2365 | 0.2228  | 0.4646  | 0.4331  | -0.086  | -0.1808 |
| PVX_000605 | -0.5469 | 0.1959  | 0.4366  | 0.489   | 0.7004  | 0.4261  | 0.2598  | -0.111  | -1.0035 |
| PVX_114945 | 0.6668  | 0.2936  | -0.458  | -1.0313 | -0.3593 | -0.1529 | 0.6323  | 1.0913  | 1.2294  |
| PVX_008085 | 1.1101  | 1.3647  | 1.3311  | 1.2346  | 0.3961  | -1.2553 | -1.2041 | -1.1708 | -0.5338 |
| PVX_106730 | -0.0523 | -0.3664 | -0.3105 | -0.1357 | -0.0413 | -0.3004 | -0.0705 | 0.1     | 0.2406  |
| PVX_093520 | 0.2071  | 0.3444  | 0.3461  | 0.249   | 0.2249  | 0.2355  | -0.2455 | -0.1925 | 0.1828  |
| PVX_001810 | 0.2695  | 0.0187  | -0.0538 | -0.2281 | -0.2787 | 0.0108  | 0.1443  | -0.362  | -0.8062 |
| PVX_117325 | -0.6978 | -0.9401 | -0.9307 | -0.3937 | 0.1786  | 0.7938  | 0.2432  | -0.125  | -0.1298 |
| PVX_101305 | 0.837   | 0.8001  | 0.5652  | 0.3956  | 0.1781  | 0.4521  | 0.1168  | -0.0217 | 0.1656  |
| PVX_088790 | -0.0195 | 0.0337  | 0.0365  | -0.4408 | -0.2415 | -0.5045 | -0.7722 | -0.211  | 0.3074  |
| PVX_115225 | 0.9808  | 0.5259  | 0.311   | 0.2168  | 0.0662  | 0.2384  | -0.0915 | -0.3792 | -0.1833 |
| PVX_089370 | -0.0774 | 0.1427  | 0.0715  | -0.1353 | -0.1711 | -0.3367 | -0.4206 | -0.5818 | -0.7492 |
| PVX_119275 | -0.004  | 0.2711  | 0.3668  | 0.3162  | 0.4312  | 0.1711  | 0.0933  | 0.1132  | -0.1177 |
| PVX_118085 | 0.4451  | 0.0675  | -0.048  | 0.0752  | 0.1268  | -0.0246 | 0.5314  | 0.7428  | 0.4885  |
| PVX_091495 | -0.2844 | -0.2862 | -0.2825 | 0.1     | 0.4241  | 0.7015  | 0.4547  | -0.3934 | -1.1051 |
| PVX_117465 | -0.6498 | -0.6656 | -0.9993 | -1.0155 | -0.7091 | -0.0112 | 0.7098  | 0.6161  | 0.4399  |
| PVX_090015 | -0.4587 | 0.2693  | 0.5567  | 0.846   | 0.7785  | -0.0236 | -0.4711 | -0.5645 | -0.5932 |
| PVX_085560 | -0.1618 | -0.5289 | -0.3614 | 0.2482  | 0.6368  | 0.5996  | -0.1059 | 0.0368  | 0.4201  |
| PVX_088950 | 0.2867  | 0.1908  | 0.3277  | 0.4721  | 0.2478  | 0.1641  | 0.2514  | 0.2895  | 0.2484  |
| PVX_117240 | 0.5444  | 0.2092  | 0.0826  | -0.0318 | 0.1357  | 0.3551  | 0.1182  | -0.2207 | -0.2842 |
| PVX_085720 | -0.6573 | 0.0784  | 0.2125  | 0.1754  | -0.0464 | -0.1444 | -0.2016 | -0.5971 | -0.7379 |
| PVX_123245 | -0.3922 | 0.572   | 0.6823  | 0.6588  | 0.3153  | -0.3519 | -0.6822 | -0.8938 | -0.7041 |

|            |         |         |         |         |         |         |         |         |         |
|------------|---------|---------|---------|---------|---------|---------|---------|---------|---------|
| PVX_089895 | -0.396  | 0.5422  | 0.812   | 0.8283  | 0.6792  | -0.1939 | -0.3801 | -0.4294 | -0.257  |
| PVX_119710 | -0.6782 | -0.2377 | 0.1003  | 0.4237  | 0.7577  | 0.8144  | 0.4445  | -0.3567 | -0.5695 |
| PVX_098655 | 0.7129  | 0.4568  | 0.2957  | -0.5527 | -0.7998 | -0.8333 | -0.3789 | 0.5509  | 1.4397  |
| PVX_119720 | -0.8112 | -0.33   | 0.2693  | 0.5998  | 0.5861  | 0.8466  | 0.3086  | -0.3683 | -0.752  |
| PVX_113545 | 0.1585  | -0.4423 | -0.7756 | -1.2192 | -1.1386 | 0.3293  | 1.145   | 0.6614  | 0.6475  |
| PVX_097840 | 0.2495  | 0.128   | 0.0863  | -0.051  | 0.02    | 0.3655  | 0.2237  | -0.0857 | -0.1076 |
| PVX_080330 | -0.8731 | -0.2168 | 0.0249  | 0.1725  | 0.494   | 0.7703  | -0.0313 | -0.4744 | -0.8624 |
| PVX_099660 | 0.3202  | -0.0664 | -0.2822 | -0.5936 | -0.3061 | 0.4306  | 0.7752  | 0.6234  | 0.8332  |
| PVX_115285 | -0.0749 | -0.3861 | -0.3491 | -0.0963 | 0.3576  | -0.4814 | -0.1913 | 0.3219  | 0.3311  |
| PVX_000805 | 0.2984  | 0.0834  | 0.0572  | 0.5777  | 0.6146  | 0.239   | 0.4709  | 0.398   | 0.4297  |
| PVX_087815 | -0.5186 | -0.1894 | -0.0718 | -0.1767 | 0.2127  | 0.3129  | 0.7711  | 0.4404  | -0.0041 |
| PVX_099840 | -1.1276 | -0.451  | -0.1908 | -0.2279 | -0.4044 | 0.2723  | 0.6491  | -0.0593 | -0.7096 |
| PVX_082830 | -0.2802 | -0.2533 | -0.3775 | -0.3252 | 0.0649  | 0.9333  | 1.0207  | 0.3514  | 0.0053  |
| PVX_113455 | 0.7575  | 0.7445  | 0.3419  | -0.368  | -0.6082 | -0.6459 | -0.2821 | 0.5126  | 1.4862  |
| PVX_085955 | -0.5998 | -0.8276 | -0.9652 | -0.9053 | -0.6862 | -0.7033 | -0.8017 | -0.3654 | 0.2854  |
| PVX_093685 | 0.7524  | 0.7384  | 0.554   | 0.3576  | -0.0345 | -0.2169 | -0.2599 | -0.3095 | -0.3445 |
| PVX_122210 | -0.9925 | -0.5998 | 0.2017  | 0.7037  | 0.8762  | 0.1924  | -0.2768 | -0.2441 | -0.2132 |
| PVX_002515 | 0.7206  | 0.5143  | 0.573   | 0.3209  | 0.2162  | 0.0208  | -0.1207 | 0.1813  | 0.2415  |
| PVX_082850 | 0.7881  | 0.1646  | -0.128  | -0.2803 | -0.2983 | -0.2312 | -0.2418 | 0.098   | 0.8338  |
| PVX_116825 | 0.0806  | 0.3057  | 0.1991  | 0.0573  | 0.3109  | 0.2434  | 0.2863  | -0.1191 | -0.6762 |
| PVX_101105 | 0.3347  | 0.471   | 0.6076  | 0.7056  | 0.3584  | -0.8173 | -1.1084 | -1.2579 | -1.1019 |
| PVX_111020 | -0.2315 | -0.7932 | -0.7646 | -0.6032 | -0.4324 | -0.238  | -0.4211 | 0.2466  | 0.011   |
| PVX_110845 | -0.5967 | -0.7657 | -0.8178 | -0.6988 | -0.4047 | 0.1178  | 0.6692  | 0.2825  | -0.0909 |
| PVX_117570 | -0.9705 | -0.8109 | -0.8217 | -0.7891 | -0.5446 | 0.1048  | 0.9913  | 0.4763  | -0.0926 |
| PVX_117345 | -0.2287 | -0.3491 | -0.216  | -0.2927 | -0.1607 | 0.2913  | 0.1795  | 0.4261  | 0.5503  |
| PVX_110840 | -0.4271 | -0.3188 | 0.1961  | 0.3734  | 0.0971  | -0.5554 | -0.5035 | -0.1923 | -0.0243 |
| PVX_081440 | 0.2074  | 0.0249  | 0.0044  | -0.1205 | 0.3262  | 0.5289  | 0.6045  | 0.3924  | 0.0661  |
| PVX_081685 | -0.129  | 0.4507  | 0.9329  | 1.1037  | 1.0133  | 0.4976  | 0.0507  | -0.018  | -0.2324 |
| PVX_091210 | 0.6955  | 0.7141  | 0.5154  | 0.3576  | 0.5867  | 0.3926  | 0.2894  | 0.4557  | 0.5123  |
| PVX_091610 | -1.4801 | -0.403  | -0.0672 | 0.1395  | 0.4731  | 0.2982  | -0.5343 | -1.17   | -1.4269 |
| PVX_121875 | -0.5577 | -0.3024 | -0.1765 | -0.3071 | -0.6357 | -0.838  | -0.8906 | -0.8338 | -0.8797 |
| PVX_114535 | -0.4117 | -0.0547 | 0.5573  | 0.5582  | 0.2578  | -0.1628 | -0.2459 | 0.1707  | -0.0589 |
| PVX_081480 | -0.4942 | -1.187  | -1.2307 | -0.9172 | -0.0347 | 0.7961  | 0.9851  | 0.2     | -0.229  |
| PVX_105700 | -0.1984 | -0.134  | 0.0186  | -0.0662 | 0.2263  | 0.1199  | -0.1457 | -0.321  | -0.4417 |
| PVX_114930 | 0.0068  | -0.6341 | -0.8141 | -0.4821 | 0.2438  | 0.4094  | 0.5033  | 0.3782  | 0.7593  |
| PVX_123815 | 0.2512  | 0.1401  | 0.8777  | 1.2416  | 1.4633  | 0.9935  | 0.7695  | 0.6143  | 0.4761  |
| PVX_093650 | -0.0195 | 0.0671  | 0.0029  | 0.06    | -0.0164 | 0.1018  | 0.3674  | 0.2647  | -0.1467 |
| PVX_101360 | 0.2299  | -0.3845 | -0.4365 | -0.253  | -0.3245 | -0.0286 | -0.1824 | -0.0592 | -0.2532 |
| PVX_081330 | 0.8783  | 0.4814  | 0.3376  | -0.2764 | -0.4644 | -0.712  | -0.2224 | 0.4727  | 1.5529  |
| PVX_123990 | -0.4259 | -0.2268 | -0.1823 | -0.2024 | 0.0842  | 0.3172  | 0.6586  | 0.1298  | -0.4347 |
| PVX_085580 | 0.5559  | -0.3858 | -0.4592 | -0.3485 | -0.0367 | -0.0695 | 0.3427  | 0.9111  | 0.6533  |
| PVX_098610 | -0.8499 | -1.1207 | -1.2717 | -1.3073 | -1.1221 | 0.7024  | 0.92    | -0.0727 | -0.3023 |
| PVX_084730 | 0.1749  | -0.1318 | -0.3445 | -0.1752 | -0.0166 | -0.2455 | 0.1674  | 0.1632  | -0.2363 |
| PVX_119305 | -0.1365 | -0.1402 | 0.4832  | 0.5681  | 0.4121  | 0.656   | 0.3628  | -0.0607 | 0.0496  |
| PVX_084430 | 0.0035  | 0.072   | 0.2558  | 0.4401  | 0.4076  | 0.3023  | 0.1031  | 0.015   | -0.2302 |
| PVX_123730 | -1.0767 | -0.412  | -0.4147 | -0.8302 | -1.4843 | -1.943  | -1.3151 | 1.2815  | 1.586   |
| PVX_085905 | 0.096   | 0.244   | 0.1896  | 0.0774  | 0.043   | 0.5383  | 0.3905  | -0.0464 | -0.0316 |
| PVX_082415 | -0.422  | -0.4896 | -0.6489 | 0.0711  | 0.3237  | 0.137   | 0.0524  | 0.6666  | 0.642   |
| PVX_094830 | -1.5291 | -1.4936 | -1.6637 | -1.7568 | -2.269  | -1.5542 | 1.1071  | 0.9825  | 0.0712  |
| PVX_117700 | -0.2932 | -0.3075 | -0.5338 | -0.7906 | -0.8519 | -0.653  | 0.278   | 1.0879  | 0.9913  |
| PVX_086320 | -0.679  | -0.9428 | -1.0234 | -0.6216 | 0.029   | 0.3528  | 0.2818  | -0.1886 | -0.1669 |
| PVX_089600 | 0.0987  | -0.1794 | -0.4655 | -0.7093 | -0.9962 | -0.9069 | -0.8353 | -0.4938 | -0.224  |
| PVX_114260 | 0.3174  | 0.2757  | -0.0113 | -0.2877 | 0.0277  | -0.0296 | 0.0985  | 0.3847  | 0.6885  |
| PVX_094515 | 0.9421  | 0.5833  | 0.4557  | 0.4608  | 0.2062  | -0.4424 | -0.4397 | -0.1105 | 0.14    |
| PVX_086095 | -0.1269 | -0.1846 | 0.0375  | 0.2621  | 0.6696  | 0.6698  | 0.268   | 0.0768  | 0.24    |
| PVX_101070 | -0.0713 | -0.2261 | -0.4716 | -0.4025 | -0.7361 | -0.4522 | 0.3614  | 1.2864  | 0.996   |
| PVX_125735 | 0.858   | 1.2785  | 1.163   | 0.3648  | -0.8259 | -1.2075 | -1.1851 | -0.4166 | 0.1336  |
| PVX_083400 | -0.0387 | 0.2197  | 0.0882  | 0.2392  | -0.1138 | 0.1705  | -0.0157 | -0.7081 | -0.6365 |
| PVX_123300 | -0.6861 | -0.8396 | -0.6726 | -0.1961 | 0.4179  | 0.5613  | 0.3966  | 0.0557  | 0.0702  |
| PVX_106215 | -0.1895 | 0.3014  | 0.0401  | 0.1107  | 0.3015  | -0.0186 | -0.3399 | -0.8443 | -0.9319 |
| PVX_089745 | 0.5318  | -0.0377 | 0.2606  | 0.3242  | -0.0883 | 0.1316  | 0.1105  | 0.9809  | 0.8769  |
| PVX_088040 | 0.4184  | 0.5073  | 0.4992  | 0.422   | 0.056   | 0.7518  | 0.5541  | -0.0758 | -0.177  |
| PVX_088145 | -0.7214 | -0.0383 | 0.231   | 0.1715  | -0.0871 | 0.4168  | 0       | -0.1651 | -0.9141 |



|            |         |         |         |         |         |         |         |         |         |
|------------|---------|---------|---------|---------|---------|---------|---------|---------|---------|
| PVX_100785 | -0.6892 | -0.298  | 0.4278  | 0.6646  | 0.7513  | 0.319   | 0.0357  | -0.2002 | -0.2737 |
| PVX_082590 | -0.9551 | -0.3923 | -0.2893 | -0.2001 | 0.0204  | 0.2198  | -0.3373 | -0.323  | -0.2356 |
| PVX_117805 | 0.1333  | -0.0417 | -0.4577 | -0.8727 | -0.9853 | -0.8748 | -0.578  | 0.1939  | 0.5134  |
| PVX_080080 | 0.0994  | 0.2172  | 0.1042  | 0.172   | 0.1014  | 0.5203  | 0.6721  | 0.5267  | 0.3158  |
| PVX_091905 | -0.5196 | -0.7547 | -1.1205 | -1.1409 | -0.9479 | -0.9288 | 0.539   | 0.9581  | 0.6285  |
| PVX_092385 | -1.1077 | -0.2613 | 0.2468  | 0.6868  | 0.7633  | -0.158  | -0.7483 | -1.0705 | -0.8761 |
| PVX_084860 | -0.7238 | -0.4675 | -0.354  | -0.1289 | -0.3726 | 0.3541  | 0.5689  | 0.3485  | -0.3549 |
| PVX_088125 | -0.1248 | -0.1698 | -0.7284 | -1.1972 | -1.1731 | -0.9875 | 0.0574  | 1.1524  | 1.0893  |
| PVX_087865 | 0.6198  | 0.4944  | 0.4182  | 0.2714  | 0.1929  | 0.2011  | 0.3706  | 0.0498  | -0.0618 |
| PVX_100610 | -0.7018 | 0.0711  | 0.336   | 0.4811  | 0.3447  | -0.0579 | -0.035  | -0.3495 | -0.7058 |
| PVX_096405 | -0.1591 | -0.0057 | 0.3332  | 0.6066  | 0.6955  | 0.2775  | 0.1406  | 0.6153  | 0.564   |
| PVX_094485 | -0.8795 | -0.9647 | -0.5738 | -0.0803 | -0.0808 | -0.0088 | 1.1498  | 1.1786  | 0.3076  |
| PVX_092515 | -0.2528 | -0.4974 | -0.9589 | -1.3553 | -1.4476 | -0.4742 | 1.3914  | 1.1706  | 0.6379  |
| PVX_117055 | 0.1754  | 0.2689  | 0.1334  | 0.0848  | -0.2279 | -0.8441 | -0.0552 | 0.788   | 0.3856  |
| PVX_089660 | -0.2323 | -0.6442 | -0.6959 | -0.4018 | 0.264   | 0.1904  | 0.1199  | -0.034  | 0.0098  |
| PVX_114180 | 0.6838  | 0.7907  | 0.7025  | 0.5874  | 0.1399  | -0.6336 | -0.5307 | -0.4466 | -0.161  |
| PVX_089285 | 0.4026  | 0.5466  | 0.5879  | 0.5277  | 0.4109  | 0.3767  | -0.2737 | -0.3972 | -0.4609 |
| PVX_080530 | 0.3683  | 0.3058  | 0.138   | -0.1734 | -0.185  | 0.2462  | 0.7496  | 0.4312  | -0.0203 |
| PVX_123645 | 0.4231  | 0.4602  | 0.3792  | 0.3817  | 0.2516  | 0.5025  | 0.4657  | -0.1838 | -0.2282 |
| PVX_096225 | 0.6701  | 0.5514  | 0.4357  | 0.3099  | 0.3135  | -0.2077 | -0.7493 | -0.8751 | -0.6822 |
| PVX_117475 | -0.9914 | 0.0051  | 0.729   | 0.9737  | 1.1194  | 0.1323  | -0.5024 | -0.6818 | -0.6606 |
| PVX_118510 | -0.3585 | -0.966  | -0.8035 | -0.1744 | 0.3269  | 0.9336  | 0.5541  | 0.0876  | -0.1489 |
| PVX_122710 | 0.2617  | 0.2979  | 0.4878  | 0.2648  | 0.3832  | -0.0013 | -0.8908 | -1.3723 | -1.1468 |
| PVX_091255 | -0.5811 | -0.8254 | -1.0122 | -1.0163 | 0.2411  | 0.3381  | 0.6613  | 0.4177  | 0.014   |
| PVX_090270 | 0.8043  | 0.6172  | 0.2354  | -0.1203 | -0.6486 | -0.6873 | -0.4117 | 0.6311  | 1.0254  |
| PVX_002730 | 0.272   | 0.4147  | 0.4214  | 0.1366  | -0.4973 | -0.3072 | -0.1732 | 0.3744  | 0.512   |
| PVX_114485 | 0.6248  | 0.1852  | -0.1984 | -0.2033 | -0.2177 | -0.0648 | 0.5145  | 0.6633  | 0.871   |
| PVX_111575 | 0.0722  | 0.2876  | 0.5208  | 0.6191  | 0.1526  | -0.2263 | -0.2859 | -0.3692 | -0.3731 |
| PVX_082540 | 0.0396  | -0.2374 | -0.2515 | -0.5315 | -0.3895 | -0.3554 | 0.6688  | 1.4083  | 0.888   |
| PVX_119490 | -1.0852 | -0.0511 | 0.4262  | 0.4644  | 0.5555  | 0.4609  | -0.3066 | -0.554  | -0.7132 |
| PVX_084120 | -1.2123 | -1.311  | -0.7694 | -0.247  | 0.1859  | 0.5453  | 0.261   | 0.1952  | 0.4818  |
| PVX_107230 | 0.2799  | 0.2707  | 0.332   | 0.1843  | 0.1669  | -0.0754 | -0.1166 | -0.0751 | -0.0606 |
| PVX_094340 | -0.0164 | -0.3419 | -0.0745 | 0.1284  | 0.28    | 0.1874  | -0.3439 | -0.3509 | -0.4635 |
| PVX_115080 | -0.249  | -0.62   | -0.1309 | 0.4188  | 0.7967  | 0.3163  | -0.3074 | -0.4517 | -0.336  |
| PVX_100615 | 0.1825  | -0.0585 | -0.2234 | -0.4708 | 0.1597  | 0.5161  | 0.7961  | 0.9668  | 0.9118  |
| PVX_114820 | -0.4246 | -0.5848 | -0.9267 | -1.2162 | -1.3565 | -1.191  | 0.4331  | 1.3173  | 0.924   |
| PVX_000900 | 0.4042  | 0.3373  | 0.0271  | -0.0542 | -0.0803 | -0.0189 | -0.0774 | 0.0777  | 0.076   |
| PVX_094550 | 0.4875  | 0.0632  | 0.1021  | -0.0235 | -0.1542 | -0.1083 | 0.4898  | 0.9701  | 1.1054  |
| PVX_112675 | -0.5245 | -0.1272 | -0.3991 | -0.9451 | -1.7159 | -1.572  | -1.2252 | -0.3018 | 0.1854  |
| PVX_084625 | 1.06    | 0.3299  | 0.0688  | -0.3024 | -0.8683 | -1.0422 | 0.1741  | -0.0459 | -0.5678 |
| PVX_002895 | -0.5793 | 0.4344  | 0.648   | 0.5006  | 0.6908  | 0.652   | -0.2912 | -0.5615 | -0.6714 |
| PVX_092140 | 0.1988  | -0.0888 | -0.2429 | -0.0929 | 0.5082  | 0.7998  | 0.571   | 0.3321  | 0.5444  |
| PVX_111090 | 0.6654  | 0.1199  | -0.4061 | -0.5408 | -0.5223 | -0.1709 | 0.3848  | 0.3448  | 0.3555  |
| PVX_098840 | -0.0514 | 0.2108  | 0.476   | 0.5412  | 0.4744  | 0.3594  | -0.1887 | -0.1998 | 0.1704  |
| PVX_118175 | -0.2817 | -0.3002 | -0.3508 | -0.649  | -0.8178 | -0.9103 | -0.4376 | 0.9376  | 1.0672  |
| PVX_082505 | 0.797   | 0.5386  | 0.1484  | -0.0882 | -0.2136 | -0.3432 | -0.0904 | 0.4724  | 0.742   |
| PVX_122285 | 0.2515  | 0.4424  | 0.5501  | 0.1786  | 0.0729  | -0.1036 | -0.5583 | -0.7613 | -0.5647 |
| PVX_101200 | -0.332  | -0.5434 | -0.7595 | -0.6201 | -0.5001 | 0.0192  | 0.4078  | 0.3444  | 0.4533  |
| PVX_084690 | 0.6237  | 0.1536  | -0.0495 | -0.0158 | 0.0977  | 0.82    | 0.7399  | 0.1021  | -0.1237 |
| PVX_117760 | 0.4244  | 0.7198  | 0.6055  | 0.5281  | 0.2176  | -1.1312 | -1.4954 | -0.4089 | -0.2725 |
| PVX_095015 | -0.275  | 0.5208  | 0.503   | 0.5437  | 0.3185  | -0.2403 | -0.8952 | -1.0694 | -1.0547 |
| PVX_091360 | -0.496  | 0.0033  | 0.3882  | 0.6796  | 0.746   | 0.5012  | -0.0008 | -0.0744 | -0.3433 |
| PVX_090330 | -0.8039 | -0.8378 | -1.0104 | -1.0878 | -1.06   | -1.0661 | -0.1441 | 1.2825  | 1.0278  |
| PVX_123020 | 0.0772  | -0.1109 | 0.5951  | 0.8166  | 0.8028  | 0.1503  | 0.1741  | 0.0259  | 0.1539  |
| PVX_114330 | 0.8111  | 0.4611  | 0.3848  | 0.0086  | -0.1348 | -0.0724 | -0.017  | 0.6751  | 1.3985  |
| PVX_097960 | -0.5427 | -0.2737 | -0.0383 | 0.214   | 0.2953  | 0.5015  | 0.471   | 0.1022  | -0.2294 |
| PVX_117630 | -0.6275 | -0.2788 | -0.3335 | -0.2548 | -0.1503 | 0.839   | 0.8272  | 0.0161  | -0.3546 |
| PVX_084570 | -0.5559 | -0.1382 | -0.0343 | 0.1444  | 0.1027  | 0.3164  | -0.1375 | -0.2308 | -0.2806 |
| PVX_081635 | -0.3306 | -0.662  | -0.674  | -0.2108 | 0.6334  | 0.5075  | 0.0574  | -0.0604 | 0.2365  |
| PVX_089340 | -0.3169 | -0.2796 | 0.0142  | 0.6849  | 0.6036  | 0.2537  | 0.076   | -0.0198 | -0.0468 |
| PVX_114065 | -0.1537 | 0.0653  | 0.2821  | 0.2188  | 0.222   | -0.0441 | -0.5005 | -0.5896 | -0.4631 |
| PVX_086940 | -0.4773 | -0.5428 | -0.8753 | -1.1553 | -1.4987 | -1.6184 | -1.1595 | 1.1548  | 1.4923  |
| PVX_098960 | -0.2374 | 0.3302  | 0.6926  | 1.0861  | 1.186   | 0.8828  | 0.4586  | 0.1186  | -0.0066 |

|            |         |         |         |         |         |         |         |         |         |
|------------|---------|---------|---------|---------|---------|---------|---------|---------|---------|
| PVX_114865 | 0.1552  | 0.4258  | 0.527   | 0.4758  | 0.4654  | -0.1861 | -0.6706 | -0.7251 | -0.8017 |
| PVX_080480 | 0.3044  | 0.3062  | 0.2844  | 0.2697  | 0.4009  | 0.5141  | 0.2278  | -0.0887 | -0.102  |
| PVX_084760 | 0.2845  | 0.4808  | 0.2737  | 0.0292  | 0.2506  | 0.3622  | 0.2481  | -0.2038 | 0.2892  |
| PVX_079760 | -0.484  | 0.2705  | 0.1728  | 0.1156  | -0.3625 | -0.3016 | -0.4184 | 0.1893  | 0.3359  |
| PVX_119450 | -0.6453 | -1.1238 | -0.4555 | 0.0393  | 0.8746  | 0.7947  | 0.2595  | -0.3181 | -0.2715 |
| PVX_099180 | -0.3388 | -0.5033 | -0.9094 | -0.6763 | -0.2216 | 0.3046  | 0.4154  | 0.3331  | 0.0043  |
| PVX_118320 | -1.2356 | -0.3002 | 0.1833  | 0.6493  | 0.7673  | 0.2232  | -0.6019 | -0.8783 | -1.0995 |
| PVX_123075 | 0.7261  | 0.6176  | 0.735   | 0.6003  | 0.496   | 0.092   | -0.6983 | -1.493  | -1.2814 |
| PVX_094580 | 0.4654  | 0.5199  | 0.3963  | 0.1976  | 0.0549  | 0.4773  | 0.3317  | -0.2017 | -0.3015 |
| PVX_097800 | -0.2585 | -0.4142 | 0.135   | 0.4309  | 0.4801  | 0.878   | 0.7337  | 0.2218  | -0.078  |
| PVX_111280 | -0.7159 | -0.2615 | -0.0807 | 0.0803  | 0.2437  | 0.5667  | 0.2415  | -0.3233 | -0.6044 |
| PVX_099000 | -1.1334 | -1.0911 | -1.6768 | -1.5896 | -1.1758 | 0.6258  | 0.9232  | 0.5753  | -0.0067 |
| PVX_087875 | 1.025   | 0.2556  | -0.2601 | -0.3899 | -0.4182 | 0.0155  | 0.5913  | 1.1761  | 1.2844  |
| PVX_123080 | 0.5558  | 0.2738  | -0.1733 | 0.0656  | 0.3506  | 0.6767  | 0.6216  | 0.7348  | 0.6067  |
| PVX_084315 | -0.2617 | -0.2764 | -0.778  | -0.6997 | -0.5144 | -0.8132 | -0.7195 | -0.1688 | 0.0881  |
| PVX_082375 | 0.3114  | 0.3747  | 0.4356  | 0.3908  | 0.3039  | 0.1749  | 0.1775  | 0.4453  | 0.3185  |
| PVX_122070 | -0.5392 | -0.5802 | -0.218  | 0.1248  | 0.3985  | 0.0226  | -0.3956 | -0.4314 | -0.2458 |
| PVX_003660 | -0.1704 | 0.1349  | 0.4058  | 0.2704  | 0.2647  | -0.219  | 0.1097  | 0.1612  | 0.3836  |
| PVX_082885 | -0.5206 | -0.2841 | -0.0997 | 0.0023  | 0.3167  | 0.5362  | -0.2728 | 0.0325  | -0.1325 |
| PVX_117095 | -0.2597 | -0.0536 | 0.1339  | 0.4371  | 0.4748  | 0.3263  | 0.1691  | -0.4131 | -0.7183 |
| PVX_094695 | -0.0935 | -0.0689 | -0.1244 | -0.1627 | -0.4328 | -0.3497 | 0.3308  | 0.4195  | 0.1017  |
| PVX_089645 | -1.1346 | -1.1537 | -1.1503 | -1.0469 | -1.034  | -0.9214 | 1.1724  | 1.1938  | -0.0574 |
| PVX_114525 | 0.8331  | 0.7295  | 0.459   | 0.3993  | 0.4132  | 0.3927  | -0.0983 | 0.1054  | 0.3552  |
| PVX_003885 | -0.0685 | 0.426   | 0.5734  | 0.6505  | 0.474   | 0.3592  | -0.3057 | -0.7313 | -0.9956 |
| PVX_093675 | 0.2958  | 0.1118  | 0.0651  | 0.2779  | 0.2057  | 0.6051  | 0.1796  | 0.19    | 0.7939  |
| PVX_080355 | 0.0267  | -0.2319 | -0.7944 | -0.5549 | -0.1056 | 0.1571  | 0.2597  | -0.052  | 0.4105  |
| PVX_085750 | -1.0567 | -0.4947 | -0.0928 | 0.4458  | 0.6445  | 0.3442  | -0.2575 | -0.5518 | -0.3859 |
| PVX_096085 | -0.1911 | -0.0692 | -0.0875 | -0.0027 | -0.2115 | -0.2042 | 0.0453  | -0.0298 | -0.4543 |
| PVX_123960 | -0.5092 | -0.9879 | -0.624  | -0.1457 | 0.3997  | 0.2614  | -0.1592 | -0.1356 | -0.4176 |
| PVX_002590 | 0.482   | 0.5237  | 0.5179  | 0.4998  | 0.6196  | 0.2715  | -0.5437 | -0.9325 | -0.6325 |
| PVX_082710 | -0.5675 | -0.2261 | -0.6191 | -0.9232 | -1.2343 | -0.7691 | -0.4526 | -0.0821 | 0.0887  |
| PVX_095450 | 0.5399  | 0.3236  | -0.1806 | -0.3285 | 0.0454  | 0.05    | 0.4997  | 0.8951  | 0.7736  |
| PVX_003710 | 0.1239  | -0.09   | -0.1043 | 0.1246  | 0.0948  | -0.0796 | 0.1005  | 0.0869  | 0.3993  |
| PVX_085925 | 0.4135  | 0.1078  | 0.0365  | 0.6863  | 0.6646  | 0.5806  | 0.5021  | 0.4937  | 0.4924  |
| PVX_094735 | -0.194  | -0.2182 | -0.5555 | -0.7581 | -0.9046 | -0.4868 | -0.599  | 0.7618  | 1.2152  |
| PVX_102635 | 0.8113  | 0.9437  | 0.6622  | 0.0795  | 0.204   | -0.1112 | 0.0426  | 0.209   | 0.4247  |
| PVX_100765 | -0.3672 | -0.5699 | -0.1715 | 0.3743  | 0.393   | 0.6826  | 0.4132  | 0.0746  | -0.168  |
| PVX_122910 | -0.3173 | -0.2355 | -0.2462 | -0.3328 | -0.1505 | 0.034   | 0.1529  | -0.4141 | -0.1619 |
| PVX_088165 | 0.3026  | 0.0322  | 0.1328  | 0.1336  | 0.1847  | -0.0846 | -0.2762 | -0.4439 | -0.6158 |
| PVX_085805 | -0.2437 | -0.0543 | 0.0933  | 0.154   | 0.4709  | 0.3201  | -0.1844 | -0.5878 | -0.4634 |
| PVX_010100 | 0.4779  | 0.4728  | 0.1821  | 0.3292  | 0.2742  | -0.058  | 0.2204  | 0.4454  | 0.5507  |
| PVX_098940 | 0.1712  | 0.3443  | 0.4255  | 0.6283  | 0.5325  | 0.6558  | 0.5732  | 0.0943  | -0.4818 |
| PVX_087045 | -0.6584 | -0.1304 | 0.1949  | 0.6304  | 0.8296  | 0.4551  | 0.0406  | -0.2494 | -0.4747 |
| PVX_116890 | 1.0216  | 0.8448  | 0.485   | -0.1879 | -0.354  | -0.3371 | -0.0621 | 0.6351  | 1.3609  |
| PVX_114735 | -0.2766 | -1.2123 | -1.7858 | -1.4092 | -0.197  | 0.8723  | 0.6602  | 0.099   | 0.3145  |
| PVX_100830 | 0.7091  | 0.6242  | 0.48    | 0.3501  | 0.3125  | -0.2729 | -0.8229 | -0.7771 | -0.5294 |
| PVX_094840 | -0.6272 | 0.3199  | 0.5374  | 0.8932  | -0.0583 | -1.7951 | -2.4855 | -2.0843 | -2.184  |
| PVX_099985 | -0.6622 | -0.0933 | 0.1029  | -0.0452 | 0.0357  | 0.1755  | 0.2307  | 0.1816  | -0.224  |
| PVX_085275 | 0.0969  | 0.2267  | 0.2819  | 0.1695  | 0.2148  | 0.0885  | -0.6768 | -1.436  | -1.4228 |
| PVX_096220 | -0.4579 | -0.3631 | -0.4258 | -0.5709 | -0.4891 | -0.0951 | -0.1363 | -0.3823 | -0.5599 |
| PVX_091235 | -0.0322 | -0.0768 | 0.0681  | 0.319   | 0.417   | -0.0259 | -0.0791 | -0.03   | -0.3323 |
| PVX_079930 | 0.034   | 0.3978  | 0.2099  | 0.2707  | 0.4692  | 0.4419  | 0.4816  | -0.3644 | -0.567  |
| PVX_084115 | -0.504  | -0.4529 | 0.0777  | 0.2923  | 0.524   | 0.3236  | 0.0997  | 0       | 0.2343  |
| PVX_091565 | -0.4787 | 0.2019  | 0.3852  | 0.4395  | 0.4712  | 0.6477  | -0.1286 | -0.6517 | -0.8846 |
| PVX_089950 | -0.7954 | -0.5893 | 0.1642  | 0.5573  | 0.7576  | 0.6504  | 0.2397  | -0.2734 | -0.4168 |
| PVX_092680 | 0.7128  | 0.3032  | -0.1371 | -0.2866 | -0.3846 | -0.6355 | -0.2208 | 0.4581  | 0.785   |
| PVX_082975 | 0.5816  | 0.5845  | 0.4591  | 0.5323  | 0.5861  | 0.5421  | 0.4722  | 0.492   | 0.5856  |
| PVX_089805 | 1.6234  | 1.6427  | 1.1855  | -0.1849 | -1.9697 | -1.992  | -1.8277 | -1.4774 | -0.9342 |
| PVX_092355 | 0.4665  | -0.2782 | -0.4865 | -0.8574 | -0.5871 | -0.5037 | 0.3584  | 0.9021  | 1.0423  |
| PVX_122830 | -0.3602 | 0.6051  | 0.5517  | 0.4384  | -0.0008 | -0.1946 | -0.3179 | -0.5556 | -0.5241 |
| PVX_122810 | -0.2869 | -0.0154 | -0.0044 | 0.0836  | 0.1985  | 0.9563  | 0.0023  | -0.9343 | -1.1647 |
| PVX_092655 | 0.4098  | 0.075   | -0.1155 | -0.727  | -0.9704 | -1.1228 | -0.5312 | 0.3542  | 1.3242  |
| PVX_096210 | 0.7002  | 0.3758  | 0.174   | -0.1312 | -0.2549 | -0.1902 | 0.4822  | 0.5919  | 0.8446  |

|            |         |         |         |         |         |         |         |         |         |
|------------|---------|---------|---------|---------|---------|---------|---------|---------|---------|
| PVX_085385 | -1.0609 | -0.6826 | -0.5429 | -0.4797 | -0.6472 | -0.542  | -1.0732 | -1.2631 | -1.2147 |
| PVX_082690 | 0.7577  | 0.4138  | 0.2818  | 0.28    | 0.5348  | 0.4403  | 0.1656  | 0.0356  | 0.1865  |
| PVX_097620 | 0.6373  | 0.1762  | -0.2705 | -0.6226 | -0.6579 | -0.4912 | 0.1051  | 0.6368  | 1.0013  |
| PVX_094570 | 0.2604  | 0.7014  | 0.9126  | 1.189   | 0.921   | 0.3946  | -0.0538 | 0.0244  | 0.0816  |
| PVX_105705 | 1.427   | 0.9262  | 0.5179  | 0.0159  | -0.2193 | -0.3593 | -0.596  | -0.5524 | -0.3273 |
| PVX_122685 | -0.1562 | 0.1667  | 0.5136  | 0.702   | 0.5912  | 0.4024  | -0.3089 | -0.6045 | -0.4763 |
| PVX_114815 | -0.4567 | -0.1753 | 0.0449  | 0.2298  | 0.1839  | 0.3702  | 0.1993  | -0.047  | -0.1039 |
| PVX_092490 | -0.6279 | -0.4419 | -0.0519 | 0.1945  | 0.3767  | 0.7082  | 0.0075  | -0.4642 | -0.6728 |
| PVX_080320 | -0.0665 | 0.3595  | 0.3709  | 0.396   | 0.5207  | 0.5578  | 0.5781  | 0.2821  | -0.0524 |
| PVX_113775 | -1.0501 | -1.2592 | -1.4009 | -1.5004 | -1.5202 | -0.5289 | 1.2734  | 1.2168  | 0.1557  |
| PVX_082955 | 0.735   | -0.0217 | -0.447  | -0.1908 | 0.2099  | 0.0258  | 0.3695  | 1.245   | 1.0549  |
| PVX_116490 | 0.0849  | 0.0152  | 0.0081  | 0.0019  | -0.3457 | -0.9146 | -1.0724 | -1.1585 | -0.9797 |
| PVX_000910 | -0.2207 | -0.5608 | -0.5942 | -0.4341 | -0.8024 | 0.1131  | 1.2282  | 0.6827  | 0.039   |
| PVX_121955 | 0.6237  | -0.0497 | -0.6333 | -0.8993 | -1.1148 | -1.3897 | -0.6888 | 0.7535  | 1.0899  |
| PVX_114585 | 0.0462  | -0.2332 | -0.2003 | -0.1174 | -0.1046 | 0.185   | 0.3091  | 0.0145  | -0.4309 |
| PVX_100590 | -0.1459 | 0.087   | 0.1255  | -0.0521 | -0.3085 | 0.1512  | 0.7908  | 0.4284  | 0.0014  |
| PVX_088845 | -0.8545 | -0.9384 | -1.0051 | -1.1998 | -1.2295 | -1.1679 | -0.5713 | 1.1576  | 1.1843  |
| PVX_080630 | -0.0863 | 0.0067  | 0.0599  | -0.2003 | -0.0328 | 0.1523  | 0.2867  | 0.0305  | 0.4831  |
| PVX_082380 | 0.9393  | 0.3378  | -0.0752 | -0.2201 | -0.4819 | -0.6532 | 0.001   | 0.4999  | 0.9586  |
| PVX_085900 | -0.4481 | -0.3472 | -0.2903 | -0.3522 | -0.2354 | -0.5463 | 0.1264  | 0.9632  | 0.8437  |
| PVX_123720 | -1.0549 | -0.22   | 0.2759  | 0.5571  | 0.6029  | 0.2842  | -0.3538 | -0.3584 | -0.4819 |
| PVX_084130 | 0.256   | 0.0959  | 0.0023  | 0.4159  | 0.4521  | 0.1959  | -0.0973 | 0.3387  | 0.9582  |
| PVX_117245 | 0.5086  | 0.3539  | 0.3161  | 0.0195  | 0.009   | 0.171   | -0.3499 | -0.3548 | -0.5248 |
| PVX_123795 | 0.0998  | 0.0482  | -0.0582 | 0.1491  | 0.372   | 0.1605  | -0.0932 | -0.1248 | -0.308  |
| PVX_097975 | -1.2309 | -0.7078 | -0.3861 | -0.1544 | 0.0638  | -0.3651 | -0.5164 | 0.8851  | 0.3938  |
| PVX_092375 | -0.1036 | 0.0791  | -0.1483 | -0.0676 | 0.0537  | -0.2928 | -0.2053 | -0.6836 | -0.561  |
| PVX_084980 | 0.699   | 0.0707  | 0.1029  | 0.0564  | -0.052  | 0.0783  | -0.1764 | 0.1141  | 0.139   |
| PVX_094435 | -0.416  | 0.2853  | 0.3381  | 0.25    | 0.3591  | 0.3153  | -0.0902 | -0.2772 | 0.1707  |
| PVX_099160 | 0.7     | 0.4005  | 0.0286  | 0.1414  | 0.3212  | 0.473   | -0.2858 | -1.034  | -0.9253 |
| PVX_113610 | 0.2842  | -0.0436 | 0.0552  | -0.0505 | 0.1392  | 0.3693  | 0.1782  | -0.3044 | -0.6194 |
| PVX_092845 | 0.6315  | 0.2109  | 0.2066  | -0.2766 | -0.6912 | -0.4691 | -0.1719 | 0.5617  | 1.2203  |
| PVX_117230 | 0.7285  | 0.3502  | 0.0696  | -0.3725 | -0.9541 | -1.3373 | -0.7788 | 0.7269  | 0.6519  |
| PVX_003995 | 0.0818  | -0.2105 | -0.0948 | -0.1472 | -0.2396 | 0.0785  | -0.1592 | -0.2737 | 0.1535  |
| PVX_099200 | -0.0496 | 0.5567  | 0.6185  | 0.6308  | 0.4749  | -0.0244 | -0.2732 | -0.3083 | -0.6222 |
| PVX_101540 | 0.303   | 0.4582  | 0.4047  | -0.0132 | 0.5004  | 0.3888  | 0.802   | 0.5289  | 0.6784  |
| PVX_121895 | 0.6362  | 0.6815  | 0.4354  | 0.1518  | -0.1246 | -0.4147 | -0.3826 | -0.4511 | -0.6445 |
| PVX_118450 | 0.1635  | 0.4419  | 0.3009  | 0.3108  | 0.7096  | 0.2673  | -0.6038 | -0.9339 | -1.0122 |
| PVX_114240 | -0.2707 | -0.0698 | 0.0636  | -0.0663 | -0.1902 | 0.3184  | 0.2725  | -0.0126 | -0.0573 |
| PVX_089470 | -0.104  | -0.1837 | 0.0165  | 0.0325  | 0.0952  | -0.0775 | 0.1473  | 0.9626  | 0.9859  |
| PVX_123940 | -0.6502 | 0.382   | 0.3145  | 0.4011  | 0.6324  | 0.2077  | -0.4652 | -0.5656 | -0.6506 |
| PVX_084525 | 0.3016  | 0.5646  | 0.5404  | 0.4527  | 0.507   | 0.444   | -0.2281 | -0.6787 | -0.6151 |
| PVX_002855 | 0.5009  | -0.1458 | -0.3721 | 0.0276  | -0.238  | -0.434  | 0.0528  | 0.5546  | 0.7039  |
| PVX_082650 | -1.954  | -2.0771 | -2.4171 | -2.65   | -2.533  | -2.1311 | -0.707  | -0.8925 | -1.2896 |
| PVX_090125 | -0.3023 | -0.743  | -0.8646 | -0.478  | 0.1555  | 0.4306  | 0.6064  | 0.2505  | 0.0941  |
| PVX_085010 | 0.1249  | 0.1542  | 0.2726  | 0.4863  | 0.3729  | 0.3244  | 0.4355  | 0.3162  | 0.1454  |
| PVX_111040 | -0.0007 | 0.4931  | 0.6628  | 0.6963  | 0.6524  | -0.0095 | -0.0314 | 0.1796  | 0.1784  |
| PVX_090025 | 0.4491  | 0.4371  | 0.4836  | 0.4536  | 0.2718  | -0.1474 | -0.5293 | -0.4196 | -0.3354 |
| PVX_117555 | -0.6854 | -0.5687 | 0.0392  | 0.5887  | 0.658   | 0.4636  | -0.2841 | -0.4387 | -0.3484 |
| PVX_095410 | -0.0172 | -0.5023 | -0.7705 | -0.6451 | 0.0707  | 0.3538  | 0.7684  | 0.6966  | 0.494   |
| PVX_094480 | 0.0621  | 0.0833  | 0.2789  | 0.4677  | 0.3479  | -0.152  | -0.0736 | 0.5032  | 0.4034  |
| PVX_089485 | 0.4465  | 0.0498  | -0.4514 | -0.6576 | -0.5772 | -0.6351 | -0.4523 | 0.0756  | 0.5647  |
| PVX_089675 | 0.305   | -0.1578 | -0.4695 | -0.3899 | 0.1792  | -0.323  | 0.1242  | 0.5893  | 0.9165  |
| PVX_099640 | -0.1955 | -0.6548 | -0.3429 | -0.3209 | -0.0706 | 0.2815  | 0.5986  | 0.2592  | -0.1014 |
| PVX_081800 | -0.2248 | -0.3623 | -0.1932 | 0.3221  | 0.4281  | 0.5361  | -0.0196 | -0.5275 | -0.6882 |
| PVX_123995 | -0.1383 | -0.1673 | -0.2107 | -0.0044 | 0.2311  | 0.5165  | 0.8117  | 0.4209  | 0.0568  |
| PVX_123400 | 0.0752  | -0.0972 | 0.2848  | 0.4569  | 0.6336  | 0.1815  | 0.1633  | 0.1586  | 0.0575  |
| PVX_124070 | 0.1498  | 0.0975  | 0.0073  | -0.1064 | 0.0436  | 0.2406  | 0.1011  | -0.0529 | -0.0623 |
| PVX_091980 | -0.87   | 0.2444  | 0.5603  | 0.5464  | 0.4779  | 0.087   | -0.6886 | -0.8825 | -0.8504 |
| PVX_002495 | -0.7016 | -0.7609 | -0.6825 | -0.7179 | -0.5553 | -0.0583 | -0.5242 | -0.1348 | -0.5036 |
| PVX_086065 | 0.1175  | 0.2381  | 0.3182  | 0.4291  | 0.4477  | 0.1939  | -0.0827 | -0.3314 | -0.2354 |
| PVX_111230 | -0.0045 | 0.1809  | 0.2394  | 0.6524  | 0.5499  | 0.1943  | 0.1449  | 0.2544  | 0.055   |
| PVX_100685 | 0.873   | 0.5945  | 0.4649  | 0.1484  | 0.0181  | -0.2364 | -0.1523 | 0.3779  | 0.8157  |
| PVX_090110 | 0.0251  | 0.1511  | 0.0936  | 0.0084  | -0.5496 | -1.0163 | -0.9064 | 0.8915  | 0.8888  |

|            |         |         |         |         |         |         |         |         |         |
|------------|---------|---------|---------|---------|---------|---------|---------|---------|---------|
| PVX_097665 | 0.2047  | -0.1604 | -0.4054 | -0.5196 | -0.1142 | -0.0864 | 0.5379  | 0.6542  | 0.6235  |
| PVX_083565 | -1.8697 | -1.8659 | -2.3225 | -2.7049 | -2.5775 | -2.6433 | -1.8974 | 1.1219  | 1.6535  |
| PVX_097795 | 0.375   | 0.1474  | 0.642   | 0.7695  | 0.8276  | 0.7415  | 0.2367  | -0.1423 | -0.4272 |
| PVX_115340 | 0.8132  | 0.759   | 0.7313  | 0.4663  | 0.2452  | 0.1673  | -0.3669 | -0.5588 | -0.3694 |
| PVX_117430 | 0.0994  | 0.3383  | 0.1766  | -0.015  | -0.2151 | -0.3958 | -0.552  | -0.4251 | -0.5021 |
| PVX_001615 | 0.2263  | 0.1925  | -0.198  | -0.1066 | -0.4353 | -0.3741 | -0.0167 | -0.0063 | -0.1254 |
| PVX_080370 | -0.3143 | -0.4321 | -0.4913 | -1.0101 | -0.5148 | -0.4417 | 0.104   | 0.2128  | -0.0349 |
| PVX_089290 | 0.6361  | 0.5723  | 0.4178  | 0.3294  | -0.1237 | -0.0767 | -0.303  | -0.6574 | -0.5234 |
| PVX_083180 | -0.4954 | -0.3437 | -0.8404 | -1.2099 | -1.4395 | -1.1543 | 0.733   | 1.1087  | 0.7193  |
| PVX_086200 | -0.8711 | -1.0556 | -1.1063 | -1.0514 | -1.0534 | -1.0808 | -0.1635 | 1.3552  | 1.0268  |
| PVX_084195 | 0.6089  | -0.3698 | -0.5965 | -0.4349 | -0.1913 | 0.1879  | 0.2858  | 0.4009  | 0.972   |
| PVX_113795 | 0.2215  | 0.3466  | 0.2081  | 0.1625  | 0.0829  | 0.2202  | 0.4371  | 0.0901  | -0.0545 |
| PVX_119350 | 0.6318  | 0.6502  | 0.6411  | 0.4152  | 0.0184  | -0.039  | 0.1945  | 0.4996  | 0.7588  |
| PVX_092645 | 0.0803  | -0.1842 | -0.3125 | -0.4669 | -0.5433 | -0.6854 | -0.5909 | -0.4075 | -0.1216 |
| PVX_079985 | -0.1651 | -0.45   | -0.3514 | -0.1873 | 0.239   | 0.6681  | 0.7321  | 0.316   | 0.2061  |
| PVX_119225 | 1.261   | 0.6562  | 0.2177  | 0.0064  | -0.3459 | -0.8702 | -1.4578 | -0.8997 | -0.366  |
| PVX_123395 | -0.4494 | -0.0538 | -0.0389 | -0.1006 | -0.1876 | 0.2351  | 0.5237  | -0.1722 | -0.31   |
| PVX_084490 | -0.54   | 0.0962  | 0.3384  | 0.6018  | 0.4258  | -0.192  | -0.8929 | -0.8472 | -0.5272 |
| PVX_100925 | -0.1726 | -0.1013 | -0.1173 | -0.1278 | -0.0528 | -0.2289 | -0.1662 | -0.4793 | -0.3451 |
| PVX_097930 | 0.6838  | 0.266   | 0.0984  | -0.2189 | -0.0203 | -0.1382 | 0.4227  | 1.0273  | 0.6971  |
| PVX_117845 | -0.7713 | -1.1169 | -0.4887 | 0.2687  | 0.7199  | 1.1944  | 0.7762  | 0.3649  | -0.0513 |
| PVX_123800 | -0.0675 | -0.1478 | -0.1192 | -0.3572 | -0.2058 | -0.2321 | 0.2271  | 0.1363  | 0.6327  |
| PVX_122750 | 0.233   | 0.2074  | -0.076  | -0.3523 | -0.4713 | -0.5219 | 0.1697  | 0.9755  | 0.7858  |
| PVX_096950 | 0.9541  | 0.5643  | 0.157   | -0.0935 | -0.1624 | -0.7871 | -1.1763 | -0.5791 | -0.0897 |
| PVX_084835 | 0.15    | 0.5395  | 0.3089  | 0.1696  | -0.0423 | -0.1041 | -0.2432 | -0.491  | -0.3536 |
| PVX_084915 | -0.4028 | -0.3735 | -0.5349 | -0.4624 | -0.3577 | -0.7999 | -0.8457 | -0.5717 | -0.3507 |
| PVX_124090 | -0.6847 | -0.8883 | -0.7034 | -0.2851 | 0.1969  | 0.4044  | 0.9071  | 0.852   | 0.2529  |
| PVX_091335 | 0.0019  | 0.3156  | 0.3667  | 0.3654  | 0.4832  | 0.3281  | 0.0956  | -0.433  | -0.6883 |
| PVX_097685 | -1.3575 | -1.71   | -1.835  | -2.3324 | -2.2519 | -1.0664 | 0.722   | 0.0038  | -0.4657 |
| PVX_093715 | 0.4476  | 0.4346  | 0.4151  | 0.475   | 0.409   | 0.5319  | 0.3901  | 0.26    | 0.1139  |
| PVX_117160 | -0.5093 | -0.3742 | -0.0884 | 0.1034  | -0.0556 | 0.7514  | 0.8806  | 0.2462  | 0.2038  |
| PVX_122525 | 0.1801  | 0.1706  | 0.2048  | 0.3379  | 0.0361  | -0.7795 | -0.9668 | -0.9171 | -0.5465 |
| PVX_087880 | -0.4596 | -0.1274 | 0.0289  | 0.074   | 0.1077  | 0.5484  | 0.4309  | -0.1246 | -0.5245 |
| PVX_100570 | -0.1575 | -0.0035 | -0.1037 | -0.1333 | 0.1454  | 0.2088  | 0.5758  | 0.8897  | 0.8072  |
| PVX_099565 | 0.0667  | 0.0451  | 0.2068  | -0.0472 | 0.1765  | 0.4977  | 0.4793  | -0.0723 | -0.4569 |
| PVX_030190 | 1.4237  | 1.1339  | 0.7747  | 0.8433  | 0.4402  | 0.1374  | -0.0476 | -0.1301 | -0.0066 |
| PVX_086240 | -0.0529 | 0.3332  | 0.3964  | 0.4449  | 0.753   | 0.2923  | -0.3742 | -0.7082 | -0.6416 |
| PVX_113375 | -0.3945 | -0.1304 | 0.0265  | 0.1988  | 0.3271  | 0.0966  | 0.4079  | -0.0906 | -0.1607 |
| PVX_083530 | 0.1749  | 0.1956  | 0.3757  | 0.5015  | 0.4672  | 0.4771  | -0.2494 | -0.649  | -0.4079 |
| PVX_082595 | -1.1269 | -1.2247 | -0.8403 | -0.5038 | -0.1933 | 0.5202  | 0.6756  | 0.1689  | -0.6398 |
| PVX_122335 | -0.6446 | -0.7501 | -0.8448 | -0.2565 | 0.8827  | 0.2673  | -0.1402 | -0.0569 | 0.037   |
| PVX_114025 | -0.5133 | -0.0513 | 0.4726  | 0.5548  | 0.6858  | -0.503  | -0.0795 | -0.0379 | -0.2535 |
| PVX_091075 | 1.1934  | 0.4112  | -0.0496 | -0.3615 | -0.505  | -0.5568 | 0.7813  | 1.2315  | 1.5027  |
| PVX_090200 | -0.6227 | -0.2246 | 0.07    | 0.0356  | -0.114  | 0.3555  | 0.398   | 0.2694  | -0.087  |
| PVX_121935 | 0.6676  | 0.7978  | 0.7361  | 0.6319  | 0.0061  | -0.3508 | -0.7719 | -1.2152 | -0.7955 |
| PVX_094635 | 0.0799  | -0.9051 | -1.3897 | -0.6909 | -0.0044 | 0.4973  | 0.5826  | 0.6335  | 0.7559  |
| PVX_084455 | 0.0143  | -0.1236 | -0.3937 | -0.8155 | -0.5226 | 0.502   | 0.9532  | 0.8246  | 0.9365  |
| PVX_080615 | -0.2031 | -0.2312 | 0.0861  | 0.2327  | 0.2176  | 0.5257  | 0.4896  | 0.2306  | 0.2071  |
| PVX_082390 | -0.0014 | 0.1331  | 0.2668  | 0.2665  | 0.2203  | 0.1912  | 0.5601  | 0.1911  | -0.0463 |
| PVX_085100 | -0.1008 | 0.1609  | 0.2488  | 0.2787  | 0.4771  | 0.5598  | 0.2265  | -0.0306 | -0.1511 |
| PVX_095120 | -0.1562 | 0.4924  | 0.648   | 0.7519  | 0.84    | 0.1239  | -0.7249 | -1.013  | -1.081  |
| PVX_086005 | 1.0879  | 0.6473  | 0.3889  | 0.254   | -0.3077 | -0.5362 | -0.6753 | 0.1382  | 0.3612  |
| PVX_114675 | 0.2642  | 0.9639  | 1.0728  | 0.9115  | 0.1116  | -0.8187 | -0.896  | -0.7241 | -0.4373 |
| PVX_088175 | 0.212   | 0.0036  | 0.1253  | 0.425   | 0.553   | 0.6663  | 0.2458  | 0.2052  | -0.1086 |
| PVX_115100 | 0.4329  | 0.1099  | -0.0469 | -0.6822 | -0.8179 | -0.8702 | -0.5209 | 0.1739  | 1.1265  |
| PVX_092165 | 0.2732  | -0.1945 | -0.4122 | -0.5669 | -0.376  | -0.3456 | 0.3287  | 0.6778  | 0.8124  |
| PVX_085155 | -0.1503 | 0.0063  | 0.1794  | 0.1055  | 0.1457  | 0.3795  | -0.2134 | -0.4428 | -0.3417 |
| PVX_082600 | 0.223   | 0.3474  | 0.3541  | 0.0196  | 0.0834  | -0.1654 | -0.4739 | -0.5085 | -0.5995 |
| PVX_125730 | 0.1883  | 0.4469  | 0.5054  | 0.7008  | 0.6134  | -0.312  | -0.6377 | -0.8301 | -0.6001 |
| PVX_097715 | -0.6989 | -1.0251 | -1.3012 | -1.2465 | -1.5966 | -1.2877 | -0.6691 | 0.8396  | 0.9188  |
| PVX_122615 | -0.5293 | -0.3805 | 0.1614  | 0.4234  | 0.4641  | 0.5856  | 0.1326  | -0.3693 | -0.5025 |
| PVX_099680 | 0.1787  | 0.2421  | 0.2138  | 0.1106  | 0.1377  | 0.0704  | -0.4541 | -0.1418 | -0.2208 |
| PVX_119290 | 0.7907  | 0.897   | 0.921   | 0.6707  | 0.315   | 0.7527  | 0.4922  | -0.0315 | 0.0174  |

|            |         |         |         |         |         |         |         |         |         |
|------------|---------|---------|---------|---------|---------|---------|---------|---------|---------|
| PVX_001875 | 0.3684  | -0.1082 | -0.5064 | -0.6532 | -0.4834 | -0.4534 | 0.3132  | 0.6247  | 0.8742  |
| PVX_085545 | -0.4542 | 0.3349  | 0.4597  | 0.5248  | 0.5171  | 0.2677  | -0.2172 | -0.4544 | -0.5005 |
| PVX_114175 | -0.7458 | -0.8599 | -0.8389 | -0.6015 | -0.7349 | -0.4282 | 0.8083  | 0.7749  | -0.1791 |
| PVX_119635 | 0.3713  | 0.3485  | 0.1746  | 0.3031  | -0.1253 | 0.1525  | -0.1923 | -0.3434 | -0.2071 |
| PVX_100690 | 0.2747  | 0.5166  | 0.4205  | 0.626   | 0.5642  | -0.1025 | -0.9068 | -0.9945 | -1.0643 |
| PVX_045190 | -0.5376 | 0.3782  | 0.4001  | 0.4374  | -0.2863 | 0.2704  | -0.3404 | -0.7745 | -0.518  |
| PVX_123785 | -1.3607 | -1.7074 | -2.1023 | -1.7548 | -1.0821 | 0.3037  | 1.1597  | 0.2217  | -0.0464 |
| PVX_082720 | -0.3235 | 0.0648  | 0.2265  | 0.3969  | 0.3272  | 0.4702  | 0.0466  | -0.5091 | -0.721  |
| PVX_114700 | 0.7582  | 0.2313  | 0.2338  | 0.1613  | -0.213  | 0.0203  | -0.626  | -0.9983 | -0.9272 |
| PVX_091390 | -0.5165 | -0.5792 | -0.1227 | 0.2738  | 0.6554  | 0.4542  | -0.1915 | -0.4582 | -0.5144 |
| PVX_091840 | 0.8152  | 0.1326  | 0.0229  | -0.1961 | -0.2109 | -0.2969 | -0.3567 | -0.1816 | 0.0462  |
| PVX_000960 | 0.3031  | 0.2012  | -0.099  | -0.1275 | 0.0643  | 0.5071  | 0.0962  | -0.2092 | -0.1489 |
| PVX_113695 | -0.7505 | -0.3639 | 0.4348  | 0.5653  | 0.5909  | 0.1412  | -0.0321 | -0.272  | -0.2924 |
| PVX_099650 | 0.7395  | 0.7097  | 0.7175  | 0.6127  | 0.6734  | 0.2861  | -0.2014 | -0.3088 | -0.2385 |
| PVX_082800 | 0.3041  | 0.83    | 0.9524  | 0.8567  | 0.7687  | 0.1691  | -0.0291 | 0.1442  | 0.2064  |
| PVX_116715 | -0.0153 | -0.0271 | -0.0465 | 0.0259  | -0.3064 | -0.3696 | -1.2159 | -1.6572 | -2.0426 |
| PVX_099670 | 1.0873  | 0.7872  | 0.3254  | -0.1902 | -0.7547 | -0.4927 | -0.2805 | 0.5301  | 1.315   |
| PVX_080000 | 1.1592  | 0.7406  | 0.5772  | 0.3409  | 0.1706  | 0.0916  | -0.1359 | -0.2201 | 0.1114  |
| PVX_088270 | -0.1114 | 0.0886  | -0.3845 | -0.2421 | -0.6022 | -0.4806 | -0.2667 | 0.3602  | 0.3507  |
| PVX_094725 | -0.0446 | -0.0038 | 0.1701  | 0.1909  | 0.0852  | 0.7499  | 0.0215  | -0.0301 | 0.0103  |
| PVX_089280 | 0.4443  | 0.5174  | 0.5523  | 0.4655  | 0.4658  | 0.0946  | -0.8116 | -1.2257 | -1.1197 |
| PVX_095190 | -1.0682 | -1.0123 | -0.9643 | -0.7003 | -0.4888 | 0.3089  | 0.5465  | 0.0416  | -0.5999 |
| PVX_122457 | -1.3142 | -0.6167 | 0.6121  | 0.8843  | 0.9094  | -0.3028 | -0.7646 | -1.1634 | -0.8652 |
| PVX_089680 | 0.7504  | -0.4113 | -0.8684 | -1.0011 | -0.5786 | 0.2152  | 0.7468  | 1.1316  | 1.3003  |
| PVX_113780 | 0.7733  | 0.5323  | 0.2911  | 0.3055  | 0.0568  | -0.1313 | 0.2647  | 0.31    | -0.0863 |
| PVX_124712 | -0.3888 | -0.0719 | 0.063   | 0.4427  | 0.1774  | -0.1702 | -0.3379 | -0.2528 | -0.1191 |
| PVX_095255 | -0.4993 | 0.0158  | 0.1294  | 0.219   | 0.3886  | 0.9378  | 0.4678  | -0.6362 | -1.1407 |
| PVX_083060 | -0.7802 | -1.253  | -1.1314 | -0.4461 | 0.2864  | 0.669   | 0.4398  | -0.3432 | -0.4199 |
| PVX_095200 | -0.4351 | 0.1832  | 0.0954  | 0.2351  | 0.3731  | 0.3728  | -0.1619 | -0.4698 | -0.4981 |
| PVX_101185 | 0.5671  | 0.7596  | 0.7109  | 0.7451  | 0.3869  | -0.1381 | -0.2653 | -0.3154 | -0.2202 |
| PVX_080410 | -0.4946 | -0.834  | -1.1378 | -1.3936 | -0.5358 | 0.4601  | 0.5121  | 0.3952  | 0.2583  |
| PVX_114390 | -0.45   | -0.6316 | -0.391  | -0.0421 | 0.2389  | 0.6658  | -0.0247 | -0.2963 | -0.3548 |
| PVX_086315 | -0.969  | -0.1801 | -0.0861 | 0.1661  | 0.5499  | 0.8197  | 0.2894  | -0.4418 | -0.7479 |
| PVX_117335 | 1.0803  | -0.1019 | -0.546  | -0.8099 | -0.8278 | -0.8819 | 0.2491  | 1.2075  | 1.4361  |
| PVX_002805 | 0.4323  | 0.1218  | 0.0677  | -0.2223 | -0.3968 | -0.5932 | -0.0556 | 0.5943  | 1.0522  |
| PVX_101085 | -0.3661 | -0.3571 | -0.4363 | -0.2449 | -0.2321 | 0.2041  | 1.1158  | 0.8063  | 0.305   |
| PVX_083505 | 0.1771  | 0.1507  | 0.2366  | 0.5556  | 0.4674  | 0.1817  | 0.101   | -0.0303 | -0.1759 |
| PVX_083320 | -0.4252 | 0.0959  | 0.1385  | 0.3539  | 0.2072  | 0.4001  | 0.0238  | -0.5589 | -0.7336 |
| PVX_122560 | -0.2009 | -0.3417 | 0.1068  | 0.6797  | 0.9424  | -0.5303 | -0.8843 | -0.5004 | -0.0312 |
| PVX_123540 | -0.3116 | -0.3525 | 0.4912  | 0.6923  | 0.4608  | -0.0102 | -0.2406 | -0.2853 | -0.1655 |
| PVX_113860 | -0.1252 | 0.2052  | 0.1992  | 0.1609  | -0.3708 | -0.1882 | -0.768  | -1.1571 | -1.3452 |
| PVX_119440 | -0.2553 | 0.2007  | 0.337   | 0.3585  | 0.56    | 0.049   | -0.6636 | -0.2425 | 0.1569  |
| PVX_084335 | 0.1602  | 0.1625  | 0.5795  | 0.9153  | 0.8529  | 0.8551  | 0.5973  | 0.1624  | -0.1472 |
| PVX_092930 | 0.5548  | -0.538  | -0.8248 | -0.8209 | -1.3441 | -0.6652 | -0.1239 | 0.7218  | 0.81    |
| PVX_096930 | 0.2803  | 0.3823  | 0.1963  | 0.4409  | 0.311   | -0.0191 | 0.1293  | 0.139   | 0.1879  |
| PVX_090280 | 0.1647  | 0.6338  | 0.3908  | 0.2838  | -0.0258 | -0.5397 | -0.4828 | 0.2404  | 0.6958  |
| PVX_100965 | -0.5085 | -0.6735 | 0.3762  | 0.8973  | 0.766   | -0.0243 | -0.4994 | -0.6599 | -0.5596 |
| PVX_083300 | -0.2494 | -0.4466 | -0.9407 | -1.3623 | -1.4224 | 1.0079  | 1.3248  | 0.7002  | 0.7009  |
| PVX_114380 | -0.1342 | 0.076   | 0.257   | 0.6203  | 0.4422  | -0.1905 | -0.0829 | 0.3216  | 0.0883  |
| PVX_116755 | 0.606   | -0.5621 | -0.9115 | -1.088  | -0.2076 | -0.1679 | -0.2091 | 0.5786  | 0.9067  |
| PVX_101525 | -0.1152 | 0.2665  | -0.0835 | -0.6669 | -1.1259 | -0.9721 | -0.8719 | 0.0295  | 0.6938  |
| PVX_003670 | -0.0268 | -0.3994 | -0.1667 | -0.1234 | -0.0516 | 0.1858  | 0.0576  | -0.0313 | 0.4565  |
| PVX_082445 | -0.3704 | -0.3071 | -0.2517 | -0.2163 | -0.0563 | 0.4285  | 0.5238  | 0.2085  | 0.0383  |
| PVX_117775 | 0.0365  | 0.0769  | 0.0774  | 0.1686  | 0.0548  | 0.3438  | 0.1223  | -0.614  | -0.8478 |
| PVX_094860 | -1.1963 | -0.2648 | 0.4522  | 0.6068  | 0.418   | -0.3136 | -0.8434 | -1.0153 | -0.7997 |
| PVX_089060 | -0.1    | 0.5232  | 0.8089  | 0.8447  | 0.3803  | -0.0192 | -0.2996 | 0.1111  | -0.0959 |
| PVX_119670 | -0.1296 | -0.1274 | 0.2563  | 0.105   | 0.1296  | 0.3708  | 0.5937  | 0.8435  | 0.6271  |
| PVX_123190 | -1.574  | -1.5036 | -1.7135 | -1.8209 | -1.8194 | -1.7362 | 1.2253  | 0.917   | 0.0398  |
| PVX_100735 | -0.4545 | -0.5471 | 0.0308  | 0.5293  | 0.8855  | 0.501   | -0.2197 | -0.2365 | -0.1479 |
| PVX_116770 | -0.0729 | -0.326  | 0.0736  | 0.3182  | 0.3005  | 0.6898  | 0.1701  | -0.0065 | 0.2045  |
| PVX_080365 | 0.4163  | 0.5791  | 0.4797  | 0.5501  | 0.5616  | -0.0496 | -0.9636 | -1.3497 | -1.3575 |
| PVX_091165 | 0.5868  | 0.4461  | 0.4715  | 0.4504  | 0.1247  | 0.0704  | -0.3729 | -0.305  | -0.3185 |
| PVX_093615 | 0.6505  | 0.6007  | 0.4379  | 0.5696  | 0.7761  | 0.4921  | 0.7707  | 0.6983  | 0.6922  |

|            |         |         |         |         |         |         |         |         |         |
|------------|---------|---------|---------|---------|---------|---------|---------|---------|---------|
| PVX_122920 | 0.336   | 0.172   | 0.3547  | 0.5694  | 0.2282  | 0.0095  | -0.6709 | -0.9291 | -0.7057 |
| PVX_082470 | 0.1857  | -0.2449 | 0.5743  | 0.8925  | 0.6507  | 0.4022  | 0.0424  | 0.1021  | 0.3027  |
| PVX_086270 | 0.5734  | -0.3069 | -0.4426 | -0.4539 | -0.4366 | 0.1213  | 0.5537  | 0.5587  | 0.5199  |
| PVX_002505 | -0.4475 | -0.5078 | -0.5035 | -0.7004 | -1.1712 | -0.9543 | -0.4418 | 0.1681  | -0.0606 |
| PVX_098025 | 0.9483  | 0.6526  | 0.7918  | 0.7451  | 0.5087  | -0.037  | -0.8169 | -0.9131 | -0.8013 |
| PVX_119695 | -0.0969 | -0.3415 | -0.1333 | 0.4963  | 0.9467  | 0.5513  | -0.1698 | -0.0107 | 0.0102  |
| PVX_117545 | 0.0649  | 0.7216  | 0.6216  | 0.3582  | -0.111  | -0.2736 | -0.3575 | -0.0364 | -0.0113 |
| PVX_110985 | -0.7814 | -0.0126 | 0.0843  | 0.2039  | 0.6664  | 0.7115  | 0.0827  | -0.4091 | -0.5856 |
| PVX_113605 | -0.006  | 0.1546  | 0.2145  | 0.0918  | 0.2985  | 0.5366  | 0.8124  | 0.6706  | 0.0784  |
| PVX_092310 | -0.697  | 0.4824  | 0.7894  | 0.8379  | 0.2766  | -0.9156 | -1.4053 | -1.403  | -1.1306 |
| PVX_080545 | -0.394  | -0.421  | 0.0324  | 0.2349  | 0.2689  | -0.0716 | -0.0635 | 0.1718  | 0.0401  |
| PVX_118590 | -0.0546 | -0.2758 | -0.0742 | 0.0372  | 0.0068  | 0.0404  | 0.0569  | 0.2698  | 0.5228  |
| PVX_100520 | 0.259   | 0.7451  | 0.7521  | 0.5691  | -0.2163 | -0.7994 | -0.7776 | -0.3677 | -0.2828 |
| PVX_115030 | 0.8923  | -0.0618 | -0.3073 | -0.5601 | -0.5808 | -0.4388 | 0.5363  | 1.1274  | 1.0142  |
| PVX_091440 | 0.0494  | 0.8583  | 0.9462  | 0.8514  | 0.4922  | -0.5139 | -0.9919 | -1.3624 | -1.1189 |
| PVX_098595 | -0.7018 | -0.1536 | 0.4144  | 0.6267  | 0.2447  | 0.1978  | -0.6049 | -0.6462 | -0.5399 |
| PVX_098880 | 0.015   | 0.46    | 0.4445  | 0.3781  | 0.038   | -0.9232 | -0.8751 | -0.5366 | -0.5157 |
| PVX_093555 | -1.2007 | -0.2737 | 0.3602  | 0.6577  | 0.7374  | 1.2076  | 0.4531  | -0.6432 | -1.0872 |
| PVX_001735 | -0.5073 | -0.364  | -0.0119 | 0.257   | 0.1803  | 0.0208  | 0.7425  | 0.9206  | 0.4143  |
| PVX_089200 | 0.0941  | 0.0175  | -0.139  | -0.1676 | -0.0631 | 0.1852  | 0.1024  | -0.4059 | -0.7091 |
| PVX_023685 | 0.6969  | 0.5705  | 0.1977  | 0.0806  | 0.1997  | 0.3667  | -0.0711 | -0.3284 | -0.2725 |
| PVX_116905 | -0.5284 | -0.2143 | 0.472   | 0.989   | 0.9893  | 0.4304  | -0.2191 | -0.5485 | -0.5592 |
| PVX_082900 | 0.117   | 0.0028  | 0.4529  | 0.6472  | 0.3339  | 0.2378  | 0.1725  | 0.1387  | 0.3382  |
| PVX_085355 | -0.189  | -0.0276 | -0.3261 | -0.3542 | -0.3645 | 0.4526  | 0.4057  | 0.1678  | 0.1336  |
| PVX_116760 | 0.1772  | -0.7367 | -0.8471 | -0.5208 | -0.1505 | 0.265   | 0.3886  | 0.5366  | 0.6781  |
| PVX_099350 | -0.2892 | -0.3894 | -0.5092 | -0.5365 | -0.7389 | -0.7736 | 0.5061  | 1.0738  | 0.678   |
| PVX_054690 | 1.2249  | 1.0965  | 0.6142  | 0.5035  | 0.0533  | -0.1094 | -0.681  | -0.7419 | -0.4926 |
| PVX_087670 | 1.065   | 0.5787  | 0.2037  | -0.0138 | -0.3645 | -1.6715 | -2.0944 | -0.9054 | -0.2539 |
| PVX_096040 | -0.2767 | 0.2737  | 0.2351  | 0.4526  | 0.1371  | -0.1591 | -0.078  | -0.1299 | -0.1679 |
| PVX_085075 | 0.7583  | 0.4003  | 0.1304  | -0.1894 | -0.2569 | -0.1452 | 0.0563  | 0.6639  | 1.0725  |
| PVX_084375 | -1.4533 | -1.3981 | -1.1367 | -0.7509 | -0.1985 | 0.5739  | 0.8501  | 0.1826  | -0.3007 |
| PVX_092305 | 0.1676  | -0.2343 | -0.2972 | -0.1929 | 0.2048  | 0.6831  | 0.5073  | -0.5661 | -0.801  |
| PVX_117480 | -1.0423 | -0.3497 | 0.0456  | 0.2278  | 0.3081  | 0.2817  | -0.1156 | -0.6215 | -0.838  |
| PVX_001665 | 0.3235  | 0.365   | 0.336   | 0.2     | 0.1199  | 0.2018  | 0.2644  | -0.2979 | -0.6215 |
| PVX_099170 | 0.2304  | -0.1807 | -0.2524 | -0.3152 | -0.0608 | 0.1652  | 0.371   | 0.2867  | 0.3303  |
| PVX_080070 | -0.0329 | -0.5297 | -0.5783 | -0.4859 | -0.6142 | 0.1276  | 0.4187  | 0.4952  | 0.6534  |
| PVX_109785 | -0.1465 | -0.1519 | -0.265  | -0.7358 | -0.1334 | -0.2029 | -0.0587 | -0.0576 | -0.1649 |
| PVX_098895 | 0.7559  | 0.4194  | 0.2426  | -0.0848 | -0.252  | -0.384  | -0.206  | 0.2262  | 0.9646  |
| PVX_080255 | 0.1722  | 0.2611  | 0.4862  | 0.5875  | 0.7431  | 0.0445  | -0.7791 | -0.606  | -0.4626 |
| PVX_113765 | 0.2058  | 0.0807  | -0.2446 | -0.7104 | -0.8806 | -0.8794 | -0.7611 | -0.0381 | 0.7788  |
| PVX_117005 | -0.9099 | -0.8896 | -1.0191 | -1.1386 | -0.8008 | -0.3563 | 0.9321  | 0.9464  | 0.0646  |
| PVX_119660 | 0.4454  | 0.3642  | 0.3119  | -0.0122 | 0.2447  | -0.0942 | -0.3628 | -0.712  | -0.5575 |
| PVX_117535 | -0.0216 | 0.1797  | 0.1414  | -0.0511 | 0.0624  | -0.055  | -0.2651 | -0.3617 | -0.4722 |
| PVX_083325 | -1.5586 | -1.5751 | -2.0031 | -1.9166 | -1.3818 | 0.057   | 1.2893  | 0.6522  | 0.0132  |
| PVX_120330 | 1.3483  | 0.9814  | 0.2258  | -0.3285 | -1.213  | -1.2637 | -1.33   | -0.0395 | 0.1936  |
| PVX_116885 | 0.1576  | -0.2409 | -0.0666 | 0.1367  | 0.0749  | -0.3015 | -0.0025 | 0.4413  | 0.6322  |
| PVX_097985 | 0.5385  | 0.1558  | 0.2101  | 0.1492  | -0.0472 | 0.18    | 0.6826  | 0.538   | 0.4411  |
| PVX_116800 | 0.5609  | 0.8402  | 0.67    | 0.8193  | 0.2916  | -0.1238 | -0.5724 | -0.6059 | -0.3345 |
| PVX_123320 | 0.3211  | -0.362  | -0.5363 | -0.1973 | 0.4116  | -0.0732 | 0.3179  | 0.3986  | 0.5426  |
| PVX_124175 | 0.0638  | 0.1717  | 0.1343  | 0.0419  | 0.1883  | 0.3431  | 0.4989  | 0.3951  | -0.4144 |
| PVX_018155 | 0.4175  | 0.2782  | 0.3388  | 0.0493  | 0.2905  | 0.3482  | 0.3552  | 0.1076  | 0.0962  |
| PVX_082405 | 0.7675  | -0.1332 | -0.532  | -0.7669 | -0.9291 | -0.8569 | 0.1785  | 0.9353  | 1.1434  |
| PVX_091860 | -0.3994 | -0.6708 | -0.436  | -0.2144 | 0.0544  | 0.3581  | 0.4441  | -0.4011 | -0.3443 |
| PVX_083160 | -0.0709 | 0.3021  | 0.2574  | 0.2719  | 0.3607  | -0.3878 | -0.2967 | 0.0078  | -0.145  |
| PVX_081710 | 0.0901  | -0.2291 | -0.4236 | -0.7279 | -0.4873 | 0.0986  | 0.404   | 0.0898  | 0.2534  |
| PVX_091315 | -0.1323 | 0.2082  | 0.3779  | 0.4354  | 0.4984  | 0.8959  | 0.1014  | -0.6411 | -1.0001 |
| PVX_092315 | -0.564  | -0.2046 | 0.1346  | 0.3684  | 0.4816  | 0.8864  | -0.16   | -0.9254 | -0.9476 |
| PVX_123550 | 0.09    | 0.3049  | 0.0872  | -0.0677 | -0.477  | -0.3929 | 0.1491  | 0.0258  | 0.3062  |
| PVX_113225 | 1.1893  | -0.2242 | -1.1135 | -1.6488 | -1.9782 | -1.5776 | -1.5236 | -0.0031 | 0.5728  |
| PVX_094910 | -0.0366 | 0.3893  | 0.5861  | 0.5205  | 0.6478  | 0.2987  | -0.2261 | -0.3872 | -0.6052 |
| PVX_003945 | 0.0352  | 0.3482  | 0.3812  | 0.3748  | 0.5013  | 0.2528  | -0.6163 | -0.8574 | -0.7826 |
| PVX_089940 | 1.07    | 0.3101  | -0.5268 | -1.1346 | -1.3728 | -1.3802 | 0.2298  | 0.944   | 1.2498  |
| PVX_123500 | -0.1195 | 0.0016  | -0.0479 | -0.2488 | -0.4051 | -0.4819 | -0.0855 | 0.2819  | -0.3697 |

|            |         |         |         |         |         |         |         |         |         |
|------------|---------|---------|---------|---------|---------|---------|---------|---------|---------|
| PVX_002555 | -0.1514 | 0.2681  | 0.4412  | 0.664   | 0.4761  | 0.4512  | -0.365  | -0.2764 | 0.0374  |
| PVX_086275 | 0.0925  | -0.5492 | -0.9033 | -0.8997 | -0.0159 | 0.8514  | 0.6165  | 0.6071  | 0.844   |
| PVX_114410 | -1.0846 | 0.2333  | 0.552   | 0.5905  | 0.5884  | -0.0642 | -0.762  | -0.4103 | -0.2073 |
| PVX_095325 | -0.0004 | 0.887   | 0.9997  | 0.8057  | 0.1289  | -0.2454 | -0.4805 | -0.6384 | -0.4323 |
| PVX_122160 | 0.4386  | -0.0062 | -0.1868 | -0.2416 | -0.0677 | -0.0539 | 0.6891  | 0.7317  | 0.7621  |
| PVX_084555 | -0.5676 | 0.1356  | 0.436   | 0.619   | 0.5803  | -0.0795 | -0.4179 | -0.3677 | -0.5368 |
| PVX_122375 | -1.0147 | -0.9032 | -0.1473 | 0.9666  | 1.081   | 0.2626  | -0.5119 | -0.7983 | -1.0072 |
| PVX_001110 | 0.6373  | 0.4452  | 0.1992  | -0.0496 | -0.4122 | -0.8753 | -0.694  | -0.3637 | -0.234  |
| PVX_117045 | -0.5822 | -0.5273 | -0.5716 | -0.5768 | -0.5763 | -0.5506 | 0.3074  | 1.2292  | 0.553   |
| PVX_120335 | 0.177   | 0.4408  | 0.7294  | 1.2196  | 0.902   | 0.3245  | 0.3831  | 0.5226  | 0.7325  |
| PVX_084355 | -0.4051 | -0.1848 | -0.1602 | -0.0622 | -0.3686 | -0.5744 | 0.5983  | 0.8484  | 0.6064  |
| PVX_116535 | 0.3601  | 0.5051  | 0.6517  | 0.6952  | 0.4481  | 0.3984  | -0.1879 | -0.2921 | -0.0224 |
| PVX_119215 | -0.5517 | -0.6543 | -0.5653 | -0.4156 | -0.6949 | -0.7927 | -0.7669 | -0.7108 | -0.5199 |
| PVX_083435 | 0.6722  | 0.2707  | -0.0679 | -0.7847 | -0.7875 | -0.7795 | -0.1668 | 0.6079  | 1.3803  |
| PVX_099025 | -0.4334 | -0.1265 | 0.3163  | 0.5025  | 0.5962  | 0.4995  | 0.0969  | -0.0923 | -0.1422 |
| PVX_084940 | -0.6089 | 0.1473  | 0.4085  | 0.5998  | 0.8672  | 0       | -0.3575 | -0.7556 | -1.1384 |
| PVX_119325 | 0.2572  | 0.0303  | -0.0597 | -0.1113 | -0.0118 | 0.1086  | 0.5925  | 1.0556  | 0.8298  |
| PVX_083195 | -0.5621 | -0.7378 | -0.5737 | -0.066  | 0.1965  | 0.4393  | 0.5789  | 0.1722  | 0.266   |
| PVX_001925 | 0.1629  | -0.4381 | -0.3586 | -0.0477 | 0.367   | 0.5599  | 0.5306  | 0.18    | 0.6019  |
| PVX_118335 | 0.3002  | 0.0826  | -0.0646 | -0.1544 | 0.0817  | 0.2734  | 0.7103  | 0.2822  | 0.083   |
| PVX_006580 | 1.2681  | 1.3382  | 1.0234  | 1.1904  | 0.6482  | 0.2852  | 0.1698  | 0.0793  | 0.3375  |
| PVX_085785 | 0.5986  | 0.2257  | 0.1866  | -0.0435 | -0.1801 | -0.3891 | -0.1908 | 0.5664  | 1.4948  |
| PVX_096105 | 0.7724  | 0.5778  | 0.2567  | 0.0556  | -0.3315 | -0.1259 | -0.2935 | 0.1116  | 0.3452  |
| PVX_092105 | -0.1513 | 0.0043  | -0.336  | -0.2168 | -0.1674 | 0.1506  | -0.131  | 0.0418  | -0.1285 |
| PVX_090835 | -0.3828 | -0.0289 | -0.3277 | -0.5216 | -0.4491 | -0.014  | 0.3752  | 0.0748  | 0.0327  |
| PVX_114800 | -0.2738 | -0.5013 | -0.3254 | 0.3217  | 0.3749  | 0.5221  | 0.3118  | -0.0061 | -0.1178 |
| PVX_095230 | -0.1247 | -0.3479 | 0.0186  | 0.2313  | 0.1002  | 0.212   | 0.2492  | 0.194   | 0.1749  |
| PVX_085910 | 0.5275  | 0.0606  | -0.5212 | -0.9736 | -0.7021 | -0.5757 | 0.6377  | 1.1455  | 1.1946  |
| PVX_092510 | 0.6446  | -0.1562 | -0.4699 | -0.6004 | -0.5847 | -0.0861 | 0.3741  | 0.6549  | 1.0292  |
| PVX_087780 | -0.4411 | 0.0052  | 0.485   | 0.5763  | 0.768   | 0.6057  | 0.1882  | -0.0052 | -0.2459 |
| PVX_114170 | -0.1902 | 0.2525  | 0.3706  | 0.4435  | 0.4232  | 0.3121  | 0.0853  | -0.4745 | -0.7353 |
| PVX_091530 | -0.0641 | -0.3159 | -0.2616 | 0.1532  | -0.25   | 0.1879  | 0.6117  | 0.3954  | 0.1518  |
| PVX_122395 | -0.4647 | -0.9933 | -0.5375 | 0.2772  | 0.8468  | 0.358   | -0.3391 | -0.289  | -0.2789 |
| PVX_087810 | -0.4125 | -1.4299 | -1.3326 | -0.8843 | -0.0481 | 0.8866  | 0.5186  | 0.0914  | 0.002   |
| PVX_079895 | -1.397  | -1.2138 | -0.8682 | -0.5217 | -0.1692 | 0.164   | 0.7874  | -0.0067 | -0.5188 |
| PVX_085325 | -0.1716 | 0.0272  | 0.4606  | 0.4999  | 0.4019  | -0.0938 | 0.5074  | 0.5989  | 0.1458  |
| PVX_092190 | 0.3236  | 0.4519  | 0.3715  | -0.1317 | 0.3133  | 0.137   | 0.0514  | 0.2036  | 0.3305  |
| PVX_100960 | 0.3438  | -0.0085 | -0.2451 | -0.2253 | -0.0258 | 0.5316  | 0.4911  | -0.0033 | 0.0233  |
| PVX_100770 | 0.6315  | 0.1755  | -0.1925 | -0.4369 | -0.2451 | 0.3099  | 0.0958  | -0.7046 | -0.9623 |
| PVX_121920 | -1.4442 | -1.3601 | -1.4502 | -1.3835 | -1.6102 | -1.5239 | -0.2647 | 1.3013  | 1.2091  |
| PVX_118500 | -0.3498 | 0.0336  | 0.1714  | 0.3214  | 0.2726  | 0.5258  | -0.3629 | -1.1449 | -0.9827 |
| PVX_101220 | -0.1925 | 0.1918  | 0.4915  | 0.395   | 0.2242  | -0.1013 | -0.6024 | -0.4949 | -0.1802 |
| PVX_123885 | 0.1246  | 0.5672  | 0.6647  | 0.6499  | 0.7077  | 0.337   | -0.0426 | -0.127  | -0.2136 |
| PVX_124045 | 0.3395  | -0.3158 | -0.2446 | -0.2075 | 0.2578  | 0.9548  | 1.0507  | 0.8146  | 0.5132  |
| PVX_122310 | 0.2599  | 0.3351  | 0.4515  | 0.1916  | 0.3116  | -0.5505 | -0.9559 | -0.7949 | -0.555  |
| PVX_098760 | 0.1769  | 0.1392  | 0.1712  | 0.3925  | 0.5166  | 0.4528  | 0.1428  | 0.1111  | -0.1416 |
| PVX_111135 | -0.3215 | -0.4928 | -0.6695 | -1.3027 | -1.531  | -1.494  | 0.5527  | 1.3992  | 1.2091  |
| PVX_079955 | -1.4914 | -1.4576 | -1.6265 | -1.6272 | -1.792  | -1.6467 | -0.0872 | 1.1017  | 1.112   |
| PVX_085175 | -1.3097 | -1.224  | -0.0633 | 0.5656  | 0.6964  | 0.8995  | -0.0627 | -0.7342 | -0.7965 |
| PVX_112630 | 0.5683  | 0.4576  | 0.4219  | 0.2661  | -0.2916 | -0.481  | -0.9056 | -0.6932 | -0.2825 |
| PVX_100815 | -0.4865 | -0.899  | -0.6855 | -0.9787 | -0.6084 | -0.4118 | 0.3334  | 0.8385  | 0.4581  |
| PVX_083370 | 0.322   | 0.5472  | 0.5499  | 0.4703  | 0.496   | 0.4867  | 0.4875  | 0.0926  | -0.1678 |
| PVX_119805 | 0.3086  | 0.026   | -0.2838 | -0.524  | -0.0812 | 0.418   | 0.6072  | 0.6742  | 0.6003  |
| PVX_081205 | -0.9708 | -0.0317 | 1.0849  | 1.2363  | 0.6543  | -0.4348 | -0.7178 | -0.6699 | -0.4922 |
| PVX_092770 | 0.8712  | 0.6305  | 0.6311  | 0.5138  | 0.223   | -0.2006 | -0.6229 | -0.3094 | 0.0267  |
| PVX_100935 | -0.7826 | 0.2929  | 0.605   | 0.5866  | 0.6174  | 0.6148  | -0.7544 | -1.2516 | -1.2138 |
| PVX_124085 | 0.6838  | 0.8331  | 0.7758  | 0.4378  | 0.1019  | -0.5451 | -0.804  | -0.237  | -0.2454 |
| PVX_086985 | -0.4455 | -0.4732 | -0.4556 | -0.3893 | -0.3028 | 0.0824  | 0.3834  | 0.5564  | 0.0852  |
| PVX_084825 | -0.8052 | -1.0479 | -1.0496 | -1.0123 | -0.211  | 0.5759  | 0.9913  | 0.3172  | 0.058   |
| PVX_000780 | 0.6024  | 0.5896  | 0.5766  | 0.4119  | 0.463   | 0.2487  | -0.2499 | -0.412  | -0.2656 |
| PVX_092615 | -0.3756 | -0.6567 | -1.0968 | -1.6321 | -1.6128 | -1.152  | 0.8287  | 0.712   | 0.5132  |
| PVX_086010 | 1.2038  | 0.2905  | 0.0239  | -0.2281 | 0.029   | -0.078  | 0.2876  | 0.8691  | 1.2656  |
| PVX_096255 | -0.2107 | 0.3372  | 0.3157  | 0.433   | 0.9948  | 0.6724  | -0.1546 | -0.6604 | -0.6931 |

|            |         |         |         |         |         |         |         |         |         |
|------------|---------|---------|---------|---------|---------|---------|---------|---------|---------|
| PVX_123260 | 0.3554  | 0.1235  | 0.1138  | -0.1995 | -0.3186 | 0.5043  | 0.4989  | 0.1621  | 0.4208  |
| PVX_002970 | -0.3715 | -0.2495 | -0.3107 | -0.5673 | -0.9002 | -0.0204 | 0.7285  | 0.2418  | 0.0658  |
| PVX_083045 | -1.8287 | -0.583  | 0.0279  | 0.9289  | 1.1886  | 0.419   | -0.7488 | -1.6188 | -1.6374 |
| PVX_086015 | -0.6911 | -0.2547 | -0.086  | 0.1409  | 0.4469  | 0.6706  | 0.4072  | -0.274  | -0.5612 |
| PVX_117310 | 0.6188  | -0.129  | -0.3282 | -0.4909 | 0.4914  | 0.633   | 0.2106  | 0.2524  | 0.8386  |
| PVX_092535 | -0.573  | -0.926  | -1.1215 | -1.18   | -0.1487 | 1.0437  | 0.8362  | 0.1464  | -0.0944 |
| PVX_082435 | 0.1226  | 0.0485  | 0.0108  | 0.1198  | 0.0747  | -0.1364 | -0.1513 | 0.191   | 0.1914  |
| PVX_086120 | 0.488   | 0.3017  | 0.2913  | 0.2695  | 0.083   | 0.4707  | -0.0246 | -0.4591 | -0.4756 |
| PVX_095265 | 0.0766  | -0.4294 | -0.066  | 0.2393  | 0.455   | 0.9137  | 0.3018  | -0.1051 | 0.1379  |
| PVX_101245 | 0.3167  | -0.1791 | -0.6732 | -0.4166 | 0.251   | 0.2918  | 0.1862  | 0.1302  | 0.2037  |
| PVX_090080 | 0.5422  | 0.6556  | 0.5876  | 0.0527  | 0.178   | -0.2445 | -0.1615 | -0.2136 | -0.0532 |
| PVX_089120 | 0.6121  | 0.5538  | 0.3682  | 0.2736  | 0.2957  | 0.3499  | 0.5148  | 0.0343  | -0.1294 |
| PVX_101275 | 0.5489  | 0.3552  | 0.1372  | -0.1055 | -0.0925 | -0.2191 | 0.3151  | 0.6831  | 0.5478  |
| PVX_079905 | -0.93   | -0.3794 | 0.1378  | 0.3437  | 0.4132  | 0.5718  | 0.2604  | -0.6697 | -0.9207 |
| PVX_123930 | -0.5558 | -0.4722 | 0.1402  | -0.0833 | 0.1276  | 0.1363  | -0.3615 | -0.095  | -0.3263 |
| PVX_094455 | 0.6043  | 0.1952  | -0.3166 | -0.2647 | 0.1074  | 0.5431  | 0.2577  | 0.6839  | 0.8079  |
| PVX_089025 | 0.3628  | 0.5906  | 0.5144  | 0.5283  | 0.2393  | -0.3744 | -0.966  | -1.2893 | -1.5529 |
| PVX_117670 | -0.4778 | -0.4411 | -0.0018 | 0.8093  | 1.0081  | 0.9319  | 0.2571  | -0.0128 | -0.0981 |
| PVX_113850 | 1.0778  | 0.8192  | 0.5934  | 0.3731  | -0.1795 | -1.4944 | -0.8893 | 0.1835  | -0.0109 |
| PVX_087680 | -0.2567 | -0.0532 | -0.2748 | -0.6412 | -0.5842 | -0.651  | -0.4041 | 0.0431  | 0.8086  |
| PVX_099010 | 0.1369  | 0.5206  | 0.6729  | 0.9024  | 0.5948  | 0.0555  | -0.053  | -0.1343 | -0.1556 |
| PVX_124170 | -0.4263 | 0.1053  | 0.3491  | 0.536   | 0.2731  | -0.4254 | -0.0975 | -0.6834 | -0.8352 |
| PVX_082890 | -0.3649 | -0.7851 | -0.1212 | 0.203   | 0.2982  | 0.2416  | 0.5778  | 0.3076  | -0.0006 |
| PVX_113485 | 1.4614  | 0.7576  | 0.4567  | 0.034   | 0.0644  | 0.1591  | 0.5134  | 0.6832  | 1.0997  |
| PVX_087015 | 0.1675  | 0.5812  | 0.622   | 0.4724  | 0.6116  | 0.1044  | -0.2716 | -0.3401 | -0.2772 |
| PVX_092950 | 0.4819  | -0.0547 | 0.3158  | -0.8022 | -0.1473 | -0.3215 | -0.0629 | 0.3688  | 0.8943  |
| PVX_080045 | -0.3028 | 0.1538  | 0.2998  | 0.4898  | 0.3007  | 0.1727  | 0.4833  | 0.5295  | 0.4131  |
| PVX_118425 | 0.1404  | -0.3741 | -0.5447 | -0.9938 | -1.2886 | -0.4604 | 0.4816  | 0.4549  | 0.6939  |
| PVX_101625 | -0.1377 | -0.1808 | -0.1984 | -0.2245 | -0.1495 | -0.4542 | -0.086  | 0.0266  | -0.0701 |
| PVX_092505 | 0.6017  | 0.104   | -0.0918 | -0.3035 | -0.4287 | -0.1827 | 0.7129  | 1.2621  | 1.2389  |
| PVX_087825 | 0.1153  | 0.2292  | 0.141   | 0.1778  | 0.2822  | 0.011   | -0.5248 | -1.2943 | -1.1734 |
| PVX_079935 | -1.3549 | -1.0842 | -0.574  | -0.1679 | 0.193   | -0.1384 | -0.2244 | -0.7816 | -0.8879 |
| PVX_115255 | 0.0753  | 0.163   | 0.0943  | 0.1087  | 0.1452  | 0.1934  | -0.4782 | -0.7169 | -0.7889 |
| PVX_115235 | -0.6156 | -0.251  | 0.3376  | 0.6898  | 0.6125  | 0.207   | -0.0884 | -0.2113 | -0.3796 |
| PVX_069690 | 0.2921  | 0.2388  | 0.3855  | 0.7189  | 0.8136  | 0.9246  | 0.8556  | 0.5982  | 0.6252  |
| PVX_123470 | 1.0947  | -0.1162 | -0.4649 | -0.8048 | -0.9758 | -0.6761 | 0.4703  | 1.0652  | 1.2446  |
| PVX_118360 | -0.7995 | -1.1454 | -0.7592 | 0.2151  | 0.4229  | 0.9997  | 0.1366  | -0.18   | -0.0922 |
| PVX_094905 | -0.7645 | -0.6362 | -0.8183 | -0.8652 | -0.8543 | -1.0719 | 1.1337  | 1.2747  | 0.6422  |
| PVX_116670 | 0.3248  | 0.4863  | 0.6389  | 0.9233  | 0.8826  | 0.5672  | 0.1659  | -0.0113 | -0.1428 |
| PVX_080240 | 0.9649  | 0.8035  | 0.7207  | 0.5331  | 0.2779  | -0.3345 | -0.5949 | -0.3912 | 0.0431  |
| PVX_084945 | -0.7256 | -0.0513 | 0.2125  | 0.3723  | 0.6599  | 0.6075  | -0.0675 | -0.4889 | -0.9671 |
| PVX_116900 | 0.3561  | 0.1507  | -0.3507 | -0.5706 | -0.8375 | -0.5822 | 0.0497  | -0.0388 | 0.0127  |
| PVX_101390 | 0.1126  | 0.0313  | 0.1545  | 0.2505  | 0.2379  | -0.3177 | -0.7947 | -0.8702 | -0.8993 |
| PVX_122760 | 1.1686  | 0.6473  | 0.2427  | -0.2036 | -0.4295 | -0.3294 | -0.0062 | 0.5166  | 1.4453  |
| PVX_089955 | 0.2224  | 0.0925  | 0.0734  | 0.0831  | -0.1758 | -0.3809 | -0.3975 | -0.3634 | -0.4325 |
| PVX_118565 | -0.2244 | -0.0355 | 0.0584  | -0.0803 | 0.0407  | 0.3679  | 0.3853  | -0.1863 | -0.7518 |
| PVX_119610 | -0.6394 | -0.3563 | -0.6922 | -0.5195 | -0.2969 | -0.5657 | -0.2852 | -0.2805 | -0.452  |
| PVX_080640 | -0.6705 | -0.3093 | -0.0489 | 0.2015  | 0.2998  | 0.4378  | 0.1754  | -0.4472 | -0.4508 |
| PVX_086935 | 0.5392  | 0.6062  | 0.2267  | -0.2242 | -0.4672 | -0.2933 | -0.3657 | -0.2027 | -0.1655 |
| PVX_099100 | 0.0483  | 0.6646  | 0.6577  | 0.4835  | 0.471   | -0.0963 | -0.2493 | -0.1766 | -0.1356 |
| PVX_082860 | -0.9855 | -0.7184 | 0.1146  | 0.5075  | 0.6813  | 0.1514  | -0.697  | -1.1017 | -1.1445 |
| PVX_123350 | 0.103   | -0.2168 | -0.3056 | -0.3344 | -0.5259 | -0.1266 | 0.2674  | 0.3022  | 0.4633  |
| PVX_096915 | 1.4614  | 0.666   | 0.1056  | 0.2743  | 0.427   | -0.1013 | -0.3444 | -0.2455 | 0.3156  |
| PVX_003735 | 0.9652  | 0.5217  | 0.3598  | 0.158   | 0.2913  | 0.3496  | 0.698   | 0.749   | 0.357   |
| PVX_121885 | -0.3605 | -0.3814 | -0.2265 | -0.2649 | -0.5823 | -0.3388 | 0.6463  | 0.4677  | 0.0116  |
| PVX_079790 | -0.0824 | 0.4378  | 0.5482  | 0.5066  | 0.4409  | 0.3567  | 0.252   | -0.0627 | 0.2412  |
| PVX_003690 | 0.3434  | -0.3001 | -0.6902 | -0.7917 | -0.7577 | -0.9104 | -0.2113 | 1.0659  | 0.7901  |
| PVX_063690 | 0.6936  | 0.5398  | 0.2778  | 0.0806  | -0.1228 | -0.3107 | -0.9297 | -1.1429 | -0.7394 |
| PVX_085375 | -0.702  | 0.2025  | 0.6583  | 0.8914  | 0.4822  | 0.0063  | -0.4696 | -0.4708 | -0.4684 |
| PVX_002640 | 0.7642  | 0.6971  | 0.8816  | 0.9916  | 0.9508  | 0.7224  | 0.6049  | 0.4138  | 0.2656  |
| PVX_117685 | -1.114  | -0.9121 | -1.0538 | -0.8651 | -0.4348 | 0.9259  | 1.0172  | 0.2083  | -0.2203 |
| PVX_122700 | -1.1199 | -0.8948 | -0.113  | 0.1137  | 0.3981  | 0.8343  | 0.3729  | -0.1129 | -0.378  |
| PVX_116855 | 1.072   | 0.6399  | -0.2829 | -0.9799 | -1.1572 | -1.0388 | 0.2621  | 1.2184  | 1.4852  |



|            |         |         |         |         |         |         |         |         |         |
|------------|---------|---------|---------|---------|---------|---------|---------|---------|---------|
| PVX_095997 | 0.2637  | -0.009  | -0.0187 | -0.08   | -0.3901 | -0.6054 | -0.6296 | -0.1438 | 0.0887  |
| PVX_093625 | 0.7479  | 0.6711  | 0.7813  | 0.8339  | 0.353   | -0.0806 | -0.6414 | -0.4665 | -0.5474 |
| PVX_087930 | 0.8215  | 0.5543  | 0.1811  | -0.0157 | -0.2227 | -0.2468 | -0.2309 | -0.051  | 0.2357  |
| PVX_091695 | -0.1045 | -0.6074 | -0.4451 | -0.1774 | -0.3935 | 0.6242  | 0.6987  | 0.4165  | 0.4317  |
| PVX_113960 | -0.4144 | -0.5064 | -0.635  | -0.8223 | -0.5244 | -0.383  | -0.654  | -0.187  | -0.3246 |
| PVX_095030 | -0.0363 | 0.3852  | 0.4936  | 0.6307  | 0.7566  | 0.5986  | 0.3805  | 0.0947  | -0.1881 |
| PVX_083105 | -0.4743 | -0.2204 | -0.0904 | 0.0901  | -0.1456 | 0.3783  | 0.0089  | 0.3573  | -0.064  |
| PVX_080435 | 0.4516  | 0.8937  | 0.5744  | 0.3057  | 0.2974  | -0.0327 | -0.2177 | -0.3169 | -0.1875 |
| PVX_112685 | -2.085  | -2.4532 | -2.8282 | -2.836  | -2.9145 | -1.7982 | -1.7644 | 0.3671  | 0.7182  |
| PVX_088115 | -0.2334 | -0.1591 | 0.1572  | 0.4107  | 0.61    | 0.2374  | 0.15    | -0.1294 | -0.1467 |
| PVX_085125 | -0.0638 | 0.7253  | 0.8628  | 0.7565  | 0.3977  | -0.247  | -0.6444 | -0.6174 | -0.5303 |
| PVX_093585 | -0.6497 | -1.0661 | -0.9485 | -1.0088 | -1.4948 | -1.1141 | 1.4059  | 1.0094  | 0.42    |
| PVX_091475 | -1.3352 | -1.3796 | -1.5046 | -1.5663 | -1.3683 | -0.7596 | 1.0942  | 1.0352  | 0.3328  |
| PVX_089795 | 0.2996  | -0.0398 | 0.2676  | 0.4077  | 0.6776  | 0.3132  | 0.4353  | 1.0237  | 0.6679  |
| PVX_002565 | -0.3137 | -0.1243 | 0.0554  | 0.0839  | -0.0761 | -0.7331 | -0.2567 | 0.8223  | 0.926   |
| PVX_080495 | 0.6094  | 0.583   | 0.4503  | 0.3207  | 0.4538  | 0.246   | -0.1114 | -0.0797 | 0.2381  |
| PVX_095140 | -1.2514 | -0.4039 | -0.1143 | 0.1611  | -0.1104 | 0.4874  | 0.11    | -0.6271 | -0.9745 |
| PVX_123865 | -0.1416 | -0.0316 | 0.2299  | -0.0162 | 0.5226  | 0.3963  | 0.4503  | 0.2937  | 0.1528  |
| PVX_120840 | -0.2417 | -0.2985 | -0.5272 | -0.706  | -0.9617 | -1.4638 | -1.1936 | -1.2944 | -1.1134 |
| PVX_098670 | -0.813  | -0.3955 | -0.0907 | -0.0691 | 0.086   | 0.3979  | 0.1182  | -0.2702 | -0.4542 |
| PVX_087755 | -1.0209 | -1.2498 | -1.2817 | -0.8097 | -0.577  | -0.04   | 0.9269  | 0.4179  | -0.3352 |
| PVX_117690 | -0.4717 | -0.0537 | 0.0333  | 0.1931  | 0.3297  | 0.4586  | 0.0539  | -0.3907 | -0.3309 |
| PVX_099605 | -0.4596 | -0.0824 | -0.2567 | -0.1194 | 0.0539  | 0.127   | 0.229   | 0.0175  | -0.1559 |
| PVX_117730 | 0.5046  | 0.0274  | 0.1473  | 0.1867  | 0.3505  | 0.3158  | 1.0154  | 1.0551  | 0.8965  |
| PVX_092720 | 0.0535  | 0.0899  | -0.0595 | 0.0945  | 0.2868  | 0.5151  | 0.5698  | 0.2677  | 0.2524  |
| PVX_010605 | -0.967  | -1.437  | -0.5999 | -0.5134 | -0.4676 | -0.4249 | -0.7939 | -0.658  | -0.6353 |
| PVX_087760 | -0.4683 | -0.464  | -0.6075 | -0.678  | -0.7648 | -0.1379 | 0.1579  | -0.1982 | 0.0161  |
| PVX_114950 | -1.3293 | -1.2055 | -1.3224 | 0.1575  | 1.0381  | 0.3874  | 0.5434  | -0.0781 | -0.2428 |
| PVX_084960 | -0.4573 | -0.4617 | -0.5668 | -0.4046 | -0.1793 | 0.8299  | 0.9109  | 0.6713  | 0.4908  |
| PVX_114090 | 0.1623  | -0.1671 | -0.1816 | 0.1494  | 0.3928  | 0.8011  | 0.3896  | 0.4288  | 0.3389  |
| PVX_123315 | 0.0921  | 0.4255  | 0.4589  | 0.4659  | 0.0846  | -0.3909 | -0.3114 | -0.056  | 0.2003  |
| PVX_118605 | 0.0204  | 0.1453  | 0.2971  | 0.3014  | 0.0961  | 0.0269  | -0.0908 | -0.386  | -0.5314 |
| PVX_098975 | 0.2913  | 0.8828  | 0.7857  | 0.6706  | 0.1251  | 0.0791  | -0.2946 | -0.0947 | 0.1925  |
| PVX_111015 | -0.3058 | -0.9071 | -1.4312 | -1.8144 | -1.2811 | -0.5952 | -0.0754 | 1.5123  | 1.174   |
| PVX_106210 | 0.2048  | 0.0173  | 0.0303  | -0.1656 | -0.1429 | 0.0421  | -0.0672 | -0.321  | -0.0937 |
| PVX_091725 | -0.4945 | -0.6813 | 0.0562  | 0.6352  | 0.6801  | 0.6485  | -0.1433 | -0.2873 | -0.223  |
| PVX_082510 | 0.3334  | 0.0891  | 0.1723  | 0.3121  | 0.2901  | 0.399   | 0.3309  | 0.386   | 0.0699  |
| PVX_114915 | 0.0322  | 0.1339  | 0.2409  | 0.3215  | 0.527   | 0.4276  | 0.1731  | -0.1287 | 0.0262  |
| PVX_051690 | 0.4404  | 0.6194  | 0.5905  | -0.0413 | 0.519   | 0.55    | 0.4005  | 0.1429  | 0.2373  |
| PVX_100890 | 0.5647  | 0.3638  | 0.1295  | -0.0811 | -0.1371 | -0.0632 | -0.0221 | -0.11   | 0.4437  |
| PVX_112670 | 0.6021  | 0.1211  | -0.2509 | -0.7445 | -1.2256 | -1.846  | -1.6518 | 0.0507  | 0.4652  |
| PVX_085975 | 0.714   | 0.2448  | 0.1716  | 0.1388  | 0.2547  | -0.4471 | -1.2657 | -0.2059 | -0.019  |
| PVX_089355 | 0.6913  | 0.4074  | 0.2626  | 0.012   | 0.1352  | -0.0665 | -0.4167 | -0.2897 | -0.0007 |
| PVX_107745 | 0.718   | 0.9051  | 0.675   | 0.2538  | -0.323  | -0.7591 | -0.5342 | -0.366  | -0.29   |
| PVX_083590 | 1.1899  | 0.9542  | 0.5975  | 0.1778  | -0.3595 | -0.0877 | 0.6957  | 0.6042  | 0.7963  |
| PVX_119585 | 0.0961  | 0.6321  | 0.5837  | 0.8156  | 0.7451  | 0.5595  | -0.3079 | -0.6995 | -0.7751 |
| PVX_118185 | 0.8119  | 0.3441  | 0.1808  | -0.1212 | -0.4222 | -0.3546 | 0.4106  | 0.7983  | 1.3353  |
| PVX_091995 | 0.2489  | -0.0758 | 0.0325  | 0.2829  | 0.268   | 0.2588  | 0.5683  | 0.7388  | 0.2462  |
| PVX_117710 | 0.2702  | 0.2683  | -0.0652 | -0.339  | -0.6544 | -0.7483 | 0.2832  | 0.9513  | 1.33    |
| PVX_091040 | 0.16    | -0.0418 | 0.0825  | 0.3833  | 0.5239  | 0.4497  | 0.0725  | -0.464  | -0.5594 |
| PVX_092405 | -0.4192 | 0.2706  | 0.4459  | 0.4891  | 0.4298  | -0.1168 | -0.5286 | -0.7026 | -0.6336 |
| PVX_099960 | 0.4542  | 0.0878  | -0.0186 | -0.0165 | -0.0546 | -0.4405 | -0.2606 | 0.0085  | 0.616   |
| PVX_101475 | -1.3509 | -0.4832 | -0.1511 | 0.1632  | 0.4596  | 0.0949  | 0.4249  | -0.1671 | -0.7564 |
| PVX_003865 | 0.6137  | 0.6284  | 0.86    | 0.5974  | 0.4392  | 0.0944  | 0.037   | -0.3289 | 0.1845  |
| PVX_091240 | -0.501  | -0.6525 | -0.8872 | -0.0784 | 0.5452  | 0.1409  | -0.0954 | -0.3593 | -0.32   |
| PVX_092430 | -0.5149 | 0.1342  | 0.4295  | 0.5094  | 0.4438  | -0.5028 | -0.9218 | -1.1304 | -0.7981 |
| PVX_087035 | -0.3329 | -0.005  | 0.0901  | 0.1885  | 0.2959  | 0       | -0.361  | -0.554  | -0.7755 |
| PVX_091780 | 0.062   | -0.081  | -0.1989 | -0.2951 | -0.0809 | 0.0977  | 0.179   | -0.0498 | -0.3305 |
| PVX_113250 | 0.4733  | 0.0932  | -0.0948 | -0.4854 | -0.5001 | -0.6394 | -0.3941 | 0.0473  | 0.2679  |
| PVX_083550 | 1.2444  | 0.3031  | -0.1576 | -0.9947 | -1.6749 | -1.6702 | -1.228  | 0.4243  | 0.54    |
| PVX_089945 | 0.4269  | 0.2455  | -0.0925 | -0.1589 | -0.0163 | -0.0016 | 0.3503  | 0.6042  | 0.636   |
| PVX_003700 | -0.3458 | 0.1992  | 0.2148  | 0.2272  | 0.1113  | -0.0323 | -0.1738 | -0.5382 | -0.6765 |
| PVX_097700 | -1.2031 | -1.4007 | -1.5511 | -1.7687 | -1.8382 | -1.1173 | 0.8828  | 0.5871  | -0.362  |

|            |         |         |         |         |         |         |         |         |         |
|------------|---------|---------|---------|---------|---------|---------|---------|---------|---------|
| PVX_122350 | 0.0142  | 0.204   | 0.5638  | 0.8867  | 0.3993  | -0.1106 | -0.2578 | -0.2021 | -0.2313 |
| PVX_020675 | 0.647   | 0.366   | 0.0261  | -0.3024 | -0.4408 | -0.4463 | -0.3549 | -0.3518 | -0.1025 |
| PVX_100005 | -1.3989 | -0.8336 | -0.5004 | -0.2104 | 0.2312  | 0.4133  | 0.5765  | -0.2161 | -0.4153 |
| PVX_118535 | 0.0515  | 0.4991  | 0.6583  | 0.6105  | 0.2464  | 0.2548  | -0.5738 | -0.6676 | -0.4337 |
| PVX_003680 | 0.3603  | -0.3608 | -0.4352 | -0.6346 | -0.725  | -0.8343 | -0.2718 | 0.3765  | 0.8672  |
| PVX_117795 | 0.006   | 0.3761  | 0.7933  | 1.0266  | 0.5199  | -0.0677 | -1.2363 | -1.3604 | -1.3382 |
| PVX_117420 | 0.2697  | 0.3854  | 0.481   | 0.3199  | 0.1826  | 0.075   | -0.5546 | -1.3784 | -1.2988 |
| PVX_084210 | -0.6242 | -0.0471 | 0.2988  | 0.309   | 0.3705  | 0.1281  | 0.2787  | -0.3976 | -0.5182 |
| PVX_113310 | -0.2601 | -0.0123 | 0.0908  | 0.0811  | 0.4724  | 0.6656  | 0.0935  | -0.1382 | -0.1631 |
| PVX_087910 | 0.0588  | -0.1062 | -0.0852 | -0.1041 | -0.1227 | -0.1815 | 0.0907  | 0.0141  | -0.3409 |
| PVX_123915 | -0.2135 | -0.0396 | 0.269   | 0.4572  | 0.6896  | 0.3113  | 0.1672  | -0.2748 | -0.1104 |
| PVX_092025 | -0.7897 | -0.271  | -0.0617 | 0.1538  | 0.4623  | 0.4865  | -0.059  | -0.547  | -0.6823 |
| PVX_001090 | 0.5773  | 0.5405  | 0.373   | 0.0849  | 0.2368  | 0.0446  | -0.0147 | 0.0368  | 0.0613  |
| PVX_098870 | 0.4683  | 0.4642  | 0.814   | 0.7129  | 0.8198  | -0.0197 | -0.3498 | -0.3316 | -0.0872 |
| PVX_098010 | -0.4208 | -0.4649 | -0.3979 | -0.4162 | -0.5311 | -0.3392 | 0.9106  | 1.008   | 0.3423  |
| PVX_098900 | 0.9815  | 0.235   | 0.1477  | 0.2017  | 0.291   | 0.8199  | 0.9707  | 1.1393  | 1.0154  |
| PVX_089020 | 0.2195  | 0.0144  | 0.0687  | 0.056   | 0.1245  | 0.6361  | 0.6508  | 0.3937  | 0.2315  |
| PVX_093590 | 0.7438  | 0.4286  | 0.5173  | 0.4069  | 0.0797  | -0.2129 | -0.5213 | -0.3474 | 0.155   |
| PVX_090845 | 0.1207  | 0.4082  | 0.4962  | 0.3588  | 0.1411  | 0.0533  | -0.6715 | -1.0845 | -0.9252 |
| PVX_122225 | -0.8793 | -0.8776 | -0.6781 | -0.4295 | -0.1221 | 0.1735  | 1.0964  | 0.7219  | 0.4558  |
| PVX_096010 | 0.6849  | 0.7414  | 0.6252  | 0.3753  | 0.0744  | -0.0642 | -0.3607 | -0.5415 | -0.5292 |
| PVX_115305 | 0.0289  | 0.1124  | 0.4519  | 0.7008  | 0.5829  | 0.5293  | 0.2969  | -0.4857 | -0.5122 |
| PVX_094965 | -0.6872 | -0.7458 | -0.9545 | -1.2797 | -1.3466 | -1.2161 | 1.065   | 1.1833  | 0.36    |
| PVX_099475 | -0.1327 | -0.3635 | 0.1903  | 0.7584  | 1.1003  | 0.4251  | -0.0012 | 0.1141  | 0.3151  |
| PVX_085265 | -0.4403 | -0.2342 | -0.1793 | 0.1592  | 0.4361  | 0.8529  | 0.2448  | -0.1711 | -0.1566 |
| PVX_091870 | 0.2482  | 0.1363  | 0.2342  | 0.3115  | 0.3297  | 0.8539  | 0.7643  | 0.2908  | 0.3718  |
| PVX_001655 | -1.9655 | -1.9261 | -2.2286 | -2.4929 | -2.4676 | -1.9057 | -1.1217 | 1.0304  | 1.4196  |
| PVX_118440 | -0.2635 | 0.3851  | 0.5482  | 0.4033  | 0.3931  | 0.4923  | 0.3149  | -0.0861 | -0.2877 |
| PVX_117870 | -0.2289 | -0.0252 | 0.514   | 0.5511  | 0.372   | 0.1857  | -0.0918 | 0.1786  | -0.0011 |
| PVX_089345 | 0.3556  | 0.2226  | -0.0317 | -0.3142 | -0.3406 | 0.1024  | 0.2539  | 0.1215  | 0.0353  |
| PVX_116995 | 0.3694  | -0.1586 | -0.4569 | -0.5927 | -0.4386 | 1.0763  | 1.1297  | 0.3757  | 0.2595  |
| PVX_083080 | -0.9678 | -0.4747 | -0.828  | -1.1609 | -1.1408 | -0.1491 | 1.1265  | 1.0898  | 0.1452  |
| PVX_113460 | -0.0475 | -0.5806 | -0.8038 | -0.4775 | 0.449   | 0.7751  | 0.4921  | 0.628   | 0.4877  |
| PVX_089915 | -1.6251 | -1.2072 | -1.0129 | -0.7924 | -0.3913 | 1.1939  | 1.1138  | 0.206   | -0.9383 |
| PVX_003930 | 0.4245  | 0.5214  | 0.4334  | 0.3452  | 0.3198  | 0.1787  | 0.1307  | 0.5756  | 0.7611  |
| PVX_113440 | 0.1637  | -0.3758 | -0.505  | -0.3361 | -0.0501 | 0.5653  | 0.5085  | 0.4451  | 0.277   |
| PVX_003530 | -2.4309 | -2.4177 | -2.6737 | -2.8521 | -2.6408 | -2.7767 | -2.0531 | 1.1054  | 1.4413  |
| PVX_119320 | 0.3545  | 0.0418  | -0.2206 | -0.6398 | -0.51   | -0.5574 | -0.2805 | 0.3583  | 1.093   |
| PVX_085025 | 0.3312  | 0.5047  | 0.5549  | 0.6848  | 0.6287  | 0.013   | -0.4361 | -0.6797 | -0.7169 |
| PVX_099320 | -0.4025 | -0.9368 | -1.2003 | -1.7817 | -1.4568 | -0.2175 | 1.0223  | 0.9423  | 0.6532  |
| PVX_084280 | -0.1901 | -0.206  | -0.0995 | -0.0589 | 0.2008  | 0.3002  | 0.2006  | -0.0159 | -0.0575 |
| PVX_123015 | 0.4499  | 0.5913  | 0.6602  | 0.6533  | 0.523   | 0.776   | 0.7835  | 0.1701  | -0.1549 |
| PVX_104185 | -0.6922 | -0.7857 | -0.8226 | -0.6201 | -0.57   | 0.5056  | 0.6518  | 1.1774  | 0.3575  |
| PVX_085095 | -0.3362 | -0.1004 | 0.14    | -0.0141 | -0.0542 | 0.5014  | 0.7526  | 0.3877  | 0.1306  |
| PVX_099460 | 0.3688  | 0.644   | 0.6753  | 0.6725  | 0.5229  | 0.178   | -0.417  | -0.4992 | -0.5511 |
| PVX_079910 | -0.3264 | -0.413  | -0.1423 | 0.2033  | 0.3298  | 0.0841  | -0.0289 | -0.2966 | -0.2117 |
| PVX_003915 | 0.2554  | 0.6409  | 0.6047  | 0.749   | 0.4679  | -0.1955 | -0.2891 | -0.2516 | -0.1628 |
| PVX_117130 | 0.7827  | 0.9411  | 0.7512  | 0.5467  | 0.0734  | -0.5071 | -1.2988 | -1.022  | -0.5841 |
| PVX_091660 | 0.8042  | 0.0871  | -0.2452 | -0.6074 | -0.6523 | -0.4798 | 0.0942  | 0.759   | 1.2576  |
| PVX_093635 | -0.3744 | -0.8411 | -0.6875 | -0.2938 | 0.2344  | 0.4046  | 0.8909  | 0.6435  | 0.041   |
| PVX_088130 | -0.9695 | -0.7168 | -0.8812 | -0.9239 | -0.8751 | 0.1959  | 0.6932  | 0.2253  | -0.7278 |
| PVX_114160 | 0.1101  | 0.4565  | 0.2588  | 0.0925  | 0.4191  | 0.9847  | 0.7584  | 0.5332  | 0.1267  |
| PVX_000870 | 0.0693  | 0.6611  | 0.7503  | 0.6854  | 0.2261  | -0.4317 | -0.5865 | -0.196  | 0.5821  |
| PVX_089815 | -1.2915 | -1.4924 | -1.4913 | -1.6204 | -1.6157 | -1.4785 | -1.1553 | 1.4994  | 1.8541  |
| PVX_085065 | 0.1394  | 0.4467  | 0.5533  | 0.5895  | 0.4245  | -0.0548 | 0.5438  | 0.3958  | 0.0148  |
| PVX_099975 | 0.6776  | 0.117   | -0.0276 | -0.1755 | -0.0948 | -0.066  | 0.1216  | 0.5625  | 0.604   |
| PVX_094700 | -0.3113 | -0.3316 | -0.3931 | -0.3423 | -0.6168 | -0.4818 | 1.0981  | 1.205   | 0.4808  |
| PVX_076695 | 0.4598  | 0.642   | 0.5405  | 0.5403  | 0.7377  | 0.5092  | 0.1807  | 0.1379  | 0.2199  |
| PVX_086080 | 0.7041  | 0.4571  | 0.0358  | -0.5911 | -0.9715 | -1.127  | -0.4085 | 0.5885  | 1.5415  |
| PVX_088245 | 0.2776  | 0.2768  | 0.2856  | 0.1514  | -0.028  | -0.0235 | -0.14   | 0.4361  | 0.6153  |
| PVX_095440 | -0.553  | -0.6393 | -0.701  | -0.1328 | 0.3818  | 0.2052  | 0.3235  | 0.6656  | 0.183   |
| PVX_117780 | -0.0697 | -0.0718 | -0.2331 | -0.4205 | -0.4809 | -0.3332 | 0.0488  | 0.141   | 0.044   |
| PVX_089235 | -0.5561 | 0.0683  | 0.0131  | 0.0605  | -0.0456 | 0.1118  | 0.5223  | -0.2714 | -0.883  |

|            |         |         |         |         |         |         |         |         |         |
|------------|---------|---------|---------|---------|---------|---------|---------|---------|---------|
| PVX_003550 | 0.3146  | 0.4047  | -0.1917 | -0.6069 | -0.8826 | -0.6156 | -0.7639 | 0.6168  | 0.8326  |
| PVX_114845 | -0.0567 | -0.6725 | -0.711  | -0.1494 | 0.4375  | 0.3006  | 0.7163  | 0.3888  | 0.4485  |
| PVX_123290 | -0.222  | -0.2629 | -0.0804 | 0.189   | 0.301   | 0.1755  | 0.1736  | 0.4327  | 0.5138  |
| PVX_121965 | -0.1573 | 0.047   | 0.2236  | 0.2926  | 0.5044  | 0.4059  | 0.1194  | 0.1151  | 0.4671  |
| PVX_118430 | 0.0888  | 0.4496  | 0.4285  | 0.4116  | 0.3152  | 0.17    | -0.0914 | -0.2862 | -0.6374 |
| PVX_081615 | 0.081   | 0.1896  | 0.373   | 0.4785  | 0.622   | 0.2914  | 0.2951  | -0.1073 | -0.1347 |
| PVX_092630 | -0.1679 | -0.2169 | 0.0227  | -0.0247 | 0.0071  | 0.1784  | 0.0973  | 0.0382  | -0.1687 |
| PVX_091810 | 0.9688  | 0.7458  | 0.6442  | 0.5154  | 0.0272  | -0.4947 | -0.9747 | -0.9045 | -0.7074 |
| PVX_087940 | 0.4926  | -0.4975 | -0.4651 | -0.4088 | -0.492  | -0.385  | 0.2219  | 0.7274  | 0.8406  |
| PVX_118295 | -0.1101 | 0.2552  | 0.4447  | 0.4668  | 0.3341  | -0.0753 | -0.9274 | -1.0919 | -0.9024 |
| PVX_123510 | 0.1429  | 0.6177  | 0.5548  | 0.4365  | 0.1441  | -0.1581 | -0.3543 | -0.753  | -0.3504 |
| PVX_110925 | 0.3257  | 0.3918  | 0.2945  | 0.1435  | -0.0104 | 0.2138  | -0.3936 | -0.9307 | -0.9639 |
| PVX_085395 | -0.1974 | 0.33    | 0.2794  | 0.1712  | 0.2399  | -0.1746 | -0.266  | -0.2219 | -0.1189 |
| PVX_083210 | 0.3532  | 0.6619  | 0.6407  | 0.8841  | 0.6916  | -0.0576 | -0.0949 | -0.1006 | -0.0538 |
| PVX_091910 | -0.9811 | -1.1005 | -1.2681 | -1.5911 | -1.6174 | -1.1231 | 0.0473  | 1.2916  | 1.2384  |
| PVX_101050 | 0.0655  | -0.083  | -0.1018 | 0.0172  | 0.1888  | 0.6859  | 0.3697  | 0.0519  | -0.2661 |
| PVX_097890 | 0.4774  | 0.5657  | 0.384   | 0.1851  | 0.2453  | 0.3177  | 0.5268  | 0.5982  | 0.7206  |
| PVX_086925 | -1.4323 | -1.3814 | -1.6657 | -1.9268 | -1.3952 | 0.8525  | 1.1149  | 0.9897  | 0.2442  |
| PVX_091750 | -0.1203 | -0.557  | -0.7832 | -0.4367 | -0.0391 | 0.6017  | 0.696   | 0.1781  | 0.2989  |
| PVX_090220 | 0.2177  | 0.1423  | 0.0197  | 0.0244  | 0.033   | 0.0203  | 0.1572  | -0.0699 | -0.5868 |
| PVX_111595 | -0.2383 | 0.0046  | 0.2199  | 0.0988  | 0.3695  | 0.2459  | 0.0446  | 0.0377  | 0.0915  |
| PVX_122550 | -1.204  | 0.4118  | 0.8911  | 1.0441  | 0.445   | -0.4105 | -0.5694 | -0.7632 | -0.9338 |
| PVX_083250 | 0.255   | -0.0823 | -0.1848 | -0.2166 | -0.1755 | 0.0133  | -0.1149 | 0.0094  | 0.2851  |
| PVX_094420 | 0.5343  | 0.1907  | 0.203   | 0.0375  | -0.0818 | -0.277  | 0.3241  | -0.1837 | -0.4619 |
| PVX_094665 | 0.6098  | 0.5152  | 0.6156  | 0.2245  | -0.106  | 0.5069  | -0.2022 | -0.1454 | 0.1772  |
| PVX_118375 | 0.382   | 0.7408  | 0.8105  | 0.7111  | 0.6819  | 0.3497  | -0.3232 | -0.6028 | -0.4869 |
| PVX_092300 | 0.0106  | 0.1701  | 0.0038  | -0.1217 | -0.1448 | 0.1541  | 0.264   | -0.0659 | 0.5331  |
| PVX_087805 | -0.3488 | -1.4316 | -1.817  | -2.2275 | -0.915  | 0.9166  | 0.8902  | 0.2383  | 0.3181  |
| PVX_119375 | 0.289   | 0.2613  | 0.529   | 0.6636  | 0.8322  | 0.5473  | 0.3634  | 0.0047  | 0.0887  |
| PVX_025690 | -1.4646 | -1.2387 | -0.9823 | -0.9588 | -0.6172 | -0.3558 | -0.427  | -0.2047 | -0.5809 |
| PVX_113890 | 0.2473  | 0.1006  | -0.2215 | -0.2046 | -0.2562 | -0.077  | 0.1755  | 0.6804  | 0.4916  |
| PVX_086285 | 0.1471  | -0.4384 | -0.2503 | 0.1722  | 0.5535  | 0.4818  | -0.2294 | -0.3572 | -0.1663 |
| PVX_085920 | 0.2816  | 0.352   | 0.3619  | 0.3915  | 0.3167  | 0.0279  | -0.1038 | -0.5712 | -0.6943 |
| PVX_085480 | -0.3491 | -0.3592 | -0.3872 | -0.0344 | -0.3495 | -0.575  | -0.8353 | -1.1044 | -0.6579 |
| PVX_122620 | 0.7631  | 0.2241  | 0.2669  | 0.4533  | 0.4128  | -0.0181 | -0.6339 | -1.2221 | -1.2117 |
| PVX_084615 | -0.0812 | -0.8137 | -1.1407 | -0.6811 | 0.2668  | 0.6729  | 0.2149  | 0.1596  | 0.5753  |
| PVX_114115 | 0.0222  | 0.084   | 0.1009  | 0.1778  | 0.2367  | 0.1025  | -0.0007 | -0.17   | -0.1015 |
| PVX_113435 | 0.3647  | -0.2147 | -0.2317 | -0.2709 | -0.1225 | 0.1324  | 0.3932  | 0.551   | 0.6114  |
| PVX_083280 | 0.8907  | 0.5276  | 0.1616  | -0.0317 | -0.4133 | -0.8099 | -0.5765 | 0.3791  | 0.3792  |
| PVX_091190 | 0.743   | 0.0865  | -0.0479 | -0.1598 | -0.269  | -0.2489 | -0.0659 | 0.6629  | 0.9425  |
| PVX_122520 | 0.2386  | 0.1734  | 0.3929  | 0.1681  | 0.1864  | -0.2257 | -0.4198 | -0.1401 | 0.0168  |
| PVX_083470 | 0.7253  | 0.3735  | 0.1227  | -0.1452 | -0.0028 | 0.1027  | 0.1316  | 0.7105  | 1.172   |
| PVX_065190 | -0.3125 | -0.4201 | -0.3937 | -0.5252 | -0.6957 | -0.7112 | -0.6364 | -0.6258 | -0.4545 |
| PVX_091880 | -0.1063 | -0.0571 | -0.4173 | -0.5503 | -0.5292 | -0.2622 | -0.5093 | -0.3414 | 0.2899  |
| PVX_085835 | -0.6064 | -0.6429 | -0.148  | 0.2138  | 0.2765  | 0.4267  | 0.1408  | -0.2138 | -0.1624 |
| PVX_114335 | -0.3223 | -0.208  | 0.0418  | 0.2805  | 0.1139  | -0.1543 | 0.3018  | 0.1329  | 0.192   |
| PVX_095080 | 0.4605  | 0.4622  | 0.5907  | 0.4795  | 0.3357  | -0.0461 | -0.9459 | -1.6648 | -1.531  |
| PVX_081525 | -0.0511 | 0.0639  | 0.1562  | -0.0621 | 0.229   | -0.2647 | -0.193  | -0.0161 | -0.0493 |
| PVX_102130 | -1.07   | -0.8134 | -0.9222 | -0.8945 | -1.1129 | -1.4464 | -1.6085 | -1.3273 | -0.9233 |
| PVX_073190 | 2.1622  | 1.9353  | 1.5736  | 1.5053  | 1.1003  | 1.0135  | 0.2772  | -0.1277 | 0.3533  |
| PVX_118540 | -0.2398 | -0.3647 | -0.1082 | -0.0796 | 0.1816  | -0.1568 | -0.193  | -0.3521 | -0.4377 |
| PVX_003585 | -0.0181 | -0.1945 | -0.1523 | -0.1787 | -0.258  | -0.5151 | -0.2288 | 0.7277  | 1.166   |
| PVX_113845 | 0.4878  | 0.4517  | 0.309   | 0.2493  | -0.0158 | -0.2751 | 0.0034  | 0.105   | 0.0028  |
| PVX_001775 | -0.5774 | -0.7083 | -0.5291 | -0.6126 | -0.4407 | 0.0079  | 0.7594  | 0.4593  | 0.1011  |
| PVX_086310 | -0.1072 | -0.2201 | -0.1533 | -0.0864 | -0.322  | 0.5255  | 0.4105  | 0.1268  | -0.0057 |
| PVX_101040 | -0.7294 | 0.2404  | 0.3971  | 0.3854  | 0.3102  | 0.2773  | -0.3582 | -1.139  | -1.1866 |
| PVX_118300 | -0.241  | -0.2352 | -0.3349 | -0.3292 | -0.3171 | -0.1099 | -0.2783 | -0.6687 | -0.8043 |
| PVX_086040 | 0.2208  | -0.242  | -0.3456 | -0.4127 | -0.2219 | 0.5738  | 0.3091  | -0.105  | -0.2907 |
| PVX_122960 | -0.3629 | 0.1657  | 0.2865  | 0.4057  | 0.6922  | 0.4867  | -0.5836 | -0.5228 | -0.0105 |
| PVX_087905 | -0.3158 | 0.052   | 0.2874  | 0.33    | 0.2103  | 0.4094  | -0.3327 | -0.6912 | -0.679  |
| PVX_003580 | -0.9767 | -1.1399 | -1.3938 | -1.1159 | 0.1558  | 0.9619  | 0.6083  | 0.1633  | -0.0702 |
| PVX_079920 | -0.2392 | 0.1189  | 0.2823  | 0.3374  | 0.457   | 0.0109  | -0.0524 | -0.2312 | -0.2894 |
| PVX_098615 | 0.2849  | 0.289   | 0.4779  | 0.5468  | 0.177   | 0.6131  | 0.2373  | -0.1141 | -0.3094 |

|            |         |         |         |         |         |         |         |         |         |
|------------|---------|---------|---------|---------|---------|---------|---------|---------|---------|
| PVX_117925 | -0.3043 | -0.1373 | 0.0705  | 0.1762  | 0.3373  | 0.4153  | 0.1315  | -0.5945 | -1.0584 |
| PVX_122150 | 0.3468  | 0.2192  | 0.4703  | 0.725   | 0.4189  | 0.3834  | 0.4473  | 0.6876  | 0.5832  |
| PVX_099315 | -0.3516 | -0.1054 | 0.015   | -0.0239 | 0.277   | 0.9751  | 0.6985  | -0.4023 | -1.0196 |
| PVX_085180 | -0.3524 | -0.4676 | -0.6068 | -0.6876 | -0.9861 | -0.7476 | -0.7864 | 0.0507  | -0.3407 |
| PVX_082450 | -0.1203 | -0.0347 | 0.1456  | 0.7592  | 0.7485  | 0.8249  | 0.276   | 0.0843  | -0.2188 |
| PVX_092675 | -1.2918 | -0.714  | -0.2546 | 0.1225  | 0.6237  | 0.6244  | 0.2599  | -0.6071 | -0.6868 |
| PVX_085150 | -0.3834 | 0.6108  | 0.7512  | 0.667   | 0.316   | -0.3558 | -0.1618 | 0.2884  | -0.1697 |
| PVX_100675 | -0.7618 | 0.2148  | 0.3567  | 0.4153  | 0.5954  | -0.0716 | -1.0448 | -1.2854 | -1.3149 |
| PVX_002790 | -1.9101 | -1.9744 | -2.1349 | -2.414  | -2.2197 | -1.8842 | 1.7003  | 1.6905  | 0.3444  |
| PVX_121915 | -1.8263 | -2.1982 | -2.4586 | -2.7606 | -2.703  | -2.7334 | -2.1248 | 1.3451  | 1.7019  |
| PVX_081355 | -1.7244 | -1.6015 | -1.5594 | -1.8633 | -2.146  | -1.8047 | -1.385  | 0.7041  | 0.9737  |
| PVX_001070 | 0.0755  | 0.1879  | 0.0325  | 0.1648  | 0.2494  | 0.6371  | 0.7456  | 0.6109  | 0.598   |
| PVX_099240 | -0.7118 | 0.2722  | 0.7421  | 0.9377  | 0.2707  | -0.7241 | -1.0102 | -0.673  | -0.6437 |
| PVX_101480 | 0.2636  | 0.013   | -0.0911 | -0.1123 | -0.0025 | -0.0296 | 0.0353  | -0.4105 | -0.4646 |
| PVX_080595 | -0.7756 | -0.3885 | 0.2353  | 0.4293  | 0.2413  | -0.0153 | -0.6597 | -0.6807 | -0.7125 |
| PVX_098765 | -0.1965 | -0.2151 | -0.4505 | -0.9633 | -0.4659 | -0.4956 | -0.3043 | -0.121  | -0.1181 |
| PVX_095005 | 0.6515  | 0.5905  | 0.2431  | 0.1741  | -0.4192 | -1.3347 | -1.4767 | -0.1432 | 0.3744  |
| PVX_088825 | -0.5034 | -0.5433 | -0.5113 | -0.5999 | -0.6286 | -0.4631 | 0.2698  | 1.0305  | 0.741   |
| PVX_084485 | -0.8067 | -1.1029 | -1.0748 | -0.961  | -0.8803 | 0.3589  | 0.6517  | 0.1626  | -0.0617 |
| PVX_093505 | 0.6979  | 0.5753  | 0.4065  | -0.0667 | -0.2781 | -0.3633 | -0.1912 | 0.6006  | 1.3158  |
| PVX_082875 | 0.5464  | 0.1153  | -0.0319 | -0.3711 | -0.776  | -0.5293 | -0.2936 | 0.3721  | 0.987   |
| PVX_094845 | 0.4477  | 0.7644  | 0.5923  | 0.6413  | -0.0149 | -0.4505 | -0.1846 | -0.1856 | 0.4237  |
| PVX_122050 | -0.7359 | -0.8437 | -0.6786 | -0.4277 | 0.1113  | 1.1084  | 0.7943  | -0.1756 | -0.2388 |
| PVX_122495 | -0.1968 | -0.216  | -0.3043 | -0.0122 | 0.2904  | 0.6177  | 1.0453  | 0.4232  | 0.4281  |
| PVX_089525 | -0.3868 | -0.6715 | -0.7934 | -0.7974 | -0.2643 | 0.2602  | 0.3702  | 0.183   | -0.0613 |
| PVX_118255 | 0.3744  | 0.2873  | 0.141   | 0.1055  | -0.3847 | -0.6575 | -0.1514 | 0.2271  | 0.3572  |
| PVX_116725 | 0.6369  | 0.3991  | 0.0198  | -0.7491 | -0.9362 | -0.81   | -0.5215 | 0.3693  | 1.1477  |
| PVX_002665 | -0.0013 | -0.3312 | -0.4566 | -0.4311 | -0.425  | -0.4728 | -0.2316 | 0.7365  | 0.6844  |
| PVX_092990 | 1.4077  | 0.531   | 0.328   | -0.1875 | -0.9337 | -1.7343 | -1.9227 | -1.5142 | -0.5609 |
| PVX_085840 | -0.399  | 0.0824  | 0.2839  | 0.422   | 0.8367  | 0.2832  | -0.484  | -0.9235 | -1.2049 |
| PVX_094385 | -0.0523 | 0.1833  | 0.3288  | 0.3717  | 0.3851  | -0.2836 | -0.1533 | 0.0881  | 0.327   |
| PVX_097735 | 0.0894  | 0.4175  | 0.4092  | 0.2079  | 0.225   | 0.0198  | -0.5889 | -1.1163 | -0.9617 |
| PVX_116660 | 0.5323  | 0.511   | 0.6241  | 0.33    | 0.3647  | 0.0785  | 0.0382  | 0.1174  | -0.0308 |
| PVX_093695 | 1.0519  | 0.9681  | 0.4733  | 0.0074  | -0.4836 | -0.1341 | -0.1141 | -0.6367 | -0.4736 |
| PVX_115025 | 1.0001  | 0.515   | 0.0309  | -0.4728 | -0.9377 | -0.4741 | -0.3818 | 0.7851  | 1.5717  |
| PVX_092330 | -0.8264 | -0.8055 | -0.156  | 0.3508  | 0.6295  | 0.2982  | 0.0038  | -0.076  | -0.1286 |
| PVX_003650 | 1.0494  | 0.3655  | 0.0046  | -0.2866 | -0.5158 | -0.3307 | 0.5532  | 0.9973  | 1.2143  |
| PVX_089550 | -0.6909 | -0.4534 | -0.545  | -0.3378 | -0.225  | -0.3271 | -0.1683 | -0.4453 | -1.1116 |
| PVX_084180 | 1.3386  | 0.8585  | 0.7402  | 0.4346  | 0.105   | -0.1573 | -0.8107 | -0.6184 | -0.3265 |
| PVX_123705 | 0.3982  | 0.1828  | -0.0386 | -0.7099 | -0.992  | -1.0583 | -0.768  | 0.1248  | 1.1754  |
| PVX_084245 | 0.2358  | 0.117   | 0.1245  | 0.2693  | 0.0463  | 0.111   | -0.1306 | 0.0359  | 0.2866  |
| PVX_114990 | 0.1833  | -0.1749 | -0.216  | -0.3717 | -0.4255 | -0.2639 | 0.3925  | 1.0112  | 0.949   |
| PVX_114080 | -0.0625 | 0.4051  | 0.4286  | 0.2465  | 0.0234  | -0.3122 | -0.3844 | -0.1771 | 0.1877  |
| PVX_100585 | -0.6315 | 0.0844  | -0.0671 | -0.2442 | -0.4534 | 0.1684  | 1.2461  | 0.2648  | -0.2738 |
| PVX_079830 | 0.3147  | 0.1212  | -0.4025 | -0.5987 | -0.6926 | -0.5493 | 0.8454  | 1.1052  | 1.125   |
| PVX_094970 | -0.3369 | -0.3784 | -0.083  | 0.4475  | 0.4991  | 0.2329  | -0.0132 | 0.062   | -0.1976 |
| PVX_117960 | -0.4057 | -0.3873 | -0.3705 | -0.3308 | -0.2662 | 0.1042  | 0.3695  | -0.2291 | -0.5569 |
| PVX_091295 | 0.2776  | -0.417  | -0.8042 | -1.104  | -0.7862 | -0.6533 | 0.6393  | 0.6689  | 0.7207  |
| PVX_098065 | -0.8646 | -0.8777 | -0.9524 | -0.7789 | 0.0244  | 0.655   | 0.8366  | 0.3269  | -0.1188 |
| PVX_085705 | -0.4072 | 0.8929  | 1.2624  | 1.1234  | 0.3871  | -0.5479 | -0.5007 | -0.5562 | -0.2807 |
| PVX_079980 | -0.439  | -0.6402 | -0.8733 | -0.9102 | -0.3387 | -0.7897 | -0.743  | 0.4421  | 0.7731  |
| PVX_085555 | -0.2805 | 0.0345  | 0.2446  | 0.2189  | 0.078   | -0.1801 | 0.5302  | 0.3275  | 0.1393  |
| PVX_084320 | -0.2791 | -0.7406 | -0.7637 | -0.5909 | -0.1441 | 0.4579  | 0.1224  | -0.0565 | -0.0558 |
| PVX_083460 | 0.0036  | 0.1238  | 0.0764  | -0.0867 | -0.5058 | -1.5354 | -0.6543 | 0.6161  | 0.6717  |
| PVX_118405 | -0.0368 | 0.1409  | 0.3163  | 0.5803  | 0.6484  | -0.3128 | -0.4629 | -0.0724 | 0.2196  |
| PVX_000595 | 0.2613  | 0.2879  | 0.328   | 0.593   | 0.441   | -0.0478 | -0.2742 | -0.1075 | 0.0296  |
| PVX_094325 | -0.6006 | 0.0229  | 0.1872  | 0.1379  | -0.0462 | 0.0154  | -0.5613 | -0.5659 | -0.6679 |
| PVX_092530 | 0.4762  | 0.1556  | 0.3212  | 0.6968  | 0.5199  | 0.3908  | 0.351   | 0.5716  | 0.5803  |
| PVX_115295 | 0.2396  | 0.6222  | 0.4456  | 0.4449  | 0.0342  | -0.6874 | -0.6714 | -0.3271 | 0.0997  |
| PVX_085200 | -0.954  | -0.5906 | 0.2076  | 0.761   | 0.9028  | 1.2624  | 0.4731  | -0.3788 | -0.6052 |
| PVX_089150 | -0.305  | -1.0949 | -1.107  | -0.0205 | 0.9137  | 0.1377  | -0.0935 | -0.0811 | 0.1508  |
| PVX_084800 | 0.3645  | 0.7314  | 0.7281  | 0.5173  | 0.3551  | -0.4015 | -0.4779 | -0.2839 | -0.157  |
| PVX_081545 | -0.2298 | -0.2529 | -0.1692 | -0.1141 | -0.0881 | -0.0322 | 0.4487  | 0.5099  | -0.0376 |

|            |         |         |         |         |         |         |         |         |         |
|------------|---------|---------|---------|---------|---------|---------|---------|---------|---------|
| PVX_088155 | -0.0506 | -0.2152 | -0.0106 | 0.1407  | -0.0091 | -0.0796 | 1.2915  | 1.0962  | 0.6503  |
| PVX_098775 | -0.5733 | -0.072  | 0.0479  | 0.3226  | 0.2074  | -0.2577 | -1.0733 | 0.0343  | 0.1942  |
| PVX_100835 | -0.1972 | -0.1215 | -0.2825 | -0.4097 | -0.0186 | -0.0629 | -0.717  | -1.1172 | -0.9674 |
| PVX_123215 | -0.2462 | -0.2481 | -0.2081 | -0.3176 | 0.3273  | 0.5274  | 0.6246  | 0.3243  | 0.3259  |
| PVX_003535 | 0.6338  | 0.4238  | -0.0439 | -0.5391 | -0.4671 | -0.3052 | -0.8378 | 0.4499  | 0.5712  |
| PVX_104190 | -0.5242 | 0.2273  | 0.4696  | 0.3192  | 0.2091  | -0.2723 | -0.5374 | -0.8333 | -0.7247 |
| PVX_085475 | 0.0201  | 0.0048  | -0.0023 | -0.2264 | -0.1985 | -0.1314 | -0.0467 | 0.0794  | 0.5119  |
| PVX_091400 | 0.2217  | 0.0053  | -0.2568 | -0.883  | -1.0589 | -0.7812 | 0.5231  | 0.9545  | 1.0662  |
| PVX_099095 | -0.2458 | -0.0692 | -0.0019 | 0.1829  | 0.18    | 0.6609  | 0.3342  | -0.5535 | -0.8214 |
| PVX_114455 | 0.336   | -0.5737 | -0.4554 | 0.1123  | 0.1705  | -0.0502 | -0.1348 | 0.4109  | 0.4884  |
| PVX_013120 | 0.2244  | 0.7441  | 0.2321  | 0.0734  | -0.0801 | -0.4284 | -0.2786 | -0.0853 | -0.2082 |
| PVX_099385 | -0.6713 | 0.0816  | 0.2775  | 0.211   | 0.3086  | 0.2141  | 0.0335  | -0.5213 | -0.5814 |
| PVX_097865 | 0.2627  | 0.5128  | 0.4912  | 0.4471  | 0.5641  | 0.3785  | -0.0597 | 0.1679  | 0.0454  |
| PVX_097925 | 0.3624  | 0.0905  | 0.4114  | 0.3605  | 0.252   | 0.7596  | 0.5071  | 0.1235  | 0.0266  |
| PVX_084645 | 0.22    | 0.402   | 0.5887  | 0.4272  | 0.2883  | 0.2553  | -0.1758 | -0.3976 | -0.3963 |
| PVX_122440 | -0.4572 | -0.7776 | -0.758  | -0.4892 | -0.2095 | 0.2662  | 1.2456  | 0.7993  | -0.0577 |
| PVX_081470 | -0.8305 | -1.1414 | -0.9487 | -0.6431 | -0.1465 | 0.8655  | 0.8691  | 0.2009  | -0.4849 |
| PVX_123950 | 0.1186  | 0.1711  | 0.2674  | 0.2992  | 0.582   | 0.758   | 0.4648  | 0.2057  | 0.0064  |
| PVX_113360 | 0.722   | 0.0305  | -0.3204 | -0.6832 | -0.6959 | -0.6377 | -0.0467 | 0.4847  | 0.7044  |
| PVX_091545 | -0.2051 | 0.3828  | 0.5781  | 0.7831  | 0.4435  | 0.0763  | -0.243  | -0.399  | -0.5378 |
| PVX_098805 | 0.6458  | 0.2358  | -0.0012 | -0.0508 | -0.0285 | -0.1547 | -0.2185 | -0.2436 | -0.1497 |
| PVX_088095 | 0.7186  | -0.1959 | -0.3119 | -0.0048 | 0.3398  | -0.2561 | -0.467  | -0.0154 | 0.503   |
| PVX_085845 | 0.6063  | -0.3176 | -0.6789 | -0.8922 | -0.5928 | -0.2857 | 0.5884  | 0.942   | 1.3005  |
| PVX_122605 | -0.0744 | 0.4091  | 0.2966  | 0.0943  | 0.0097  | 0.0754  | 0.0015  | -0.4686 | -0.9216 |
| PVX_080430 | -0.2878 | -0.0551 | -0.2062 | -0.3454 | -0.0465 | 0.404   | 0.6027  | 0.4905  | 0.1146  |
| PVX_074695 | 0.8036  | 0.7299  | -0.1818 | -0.0373 | 0.1244  | 0.4317  | 0.2945  | 0.3533  | 0.4177  |
| PVX_092840 | -0.7166 | -1.1112 | -0.5428 | 0.1313  | 0.5664  | 0.3838  | -0.1956 | -0.7908 | -0.7576 |
| PVX_083365 | -1.2971 | -0.026  | 0.3308  | 0.685   | 0.454   | 0.2572  | -0.2186 | -0.784  | -1.2081 |
| PVX_002625 | 0.263   | -0.4246 | -0.1068 | 0.2399  | 0.6097  | 0.2839  | -0.1857 | 0.0606  | 0.3951  |
| PVX_124195 | 0.1525  | 0.3767  | 0.3467  | 0.2804  | -0.0223 | 0.154   | 0.4917  | 0.1947  | 0.0463  |
| PVX_091815 | 0.501   | 0.5965  | 0.2248  | 0.1692  | -0.1374 | 0.694   | 0.7197  | 0.3165  | -0.0775 |
| PVX_083380 | 0.3832  | 0.2503  | 0.025   | -0.1065 | -0.4107 | 0.0067  | 0.4072  | 0.0689  | 0.2173  |
| PVX_113235 | 0.9202  | 0.6676  | 0.3716  | 0.1659  | -0.0687 | -0.1834 | -0.2277 | -0.4182 | -0.3814 |
| PVX_080245 | 0.5926  | 0.2441  | 0.5621  | 0.5025  | 0.3719  | 0.0931  | -0.5456 | -0.9886 | -1.0652 |
| PVX_000640 | -0.42   | -0.624  | 0.0492  | 0.5141  | 0.649   | 0.2346  | -0.2878 | -0.4736 | -0.4761 |
| PVX_084675 | -1.1495 | -0.1197 | 0.4691  | 0.489   | 0.6196  | 0.2693  | -0.1952 | -0.0557 | -0.065  |
| PVX_121870 | 1.4941  | 1.1098  | 0.4995  | 0.2078  | 0.0998  | 0.5514  | 0.2242  | 0.1357  | 0.3801  |
| PVX_094895 | 0.4884  | 0.4206  | 0.1458  | 0.0413  | 0.1167  | 0.0375  | -0.0327 | -0.1425 | 0.0586  |
| PVX_115435 | 0.6208  | 0.7184  | 0.6904  | 0.7054  | 0.4898  | 0.2823  | -0.0754 | -0.2911 | 0.2031  |
| PVX_113950 | -0.3218 | -0.0689 | 0.0127  | -0.0374 | -0.3507 | 0.2835  | 0.4994  | 0.1369  | -0.1045 |
| PVX_096075 | 0.5505  | 0.5449  | 0.7034  | 0.5143  | 0.2372  | -0.6381 | -0.8044 | -0.602  | -0.404  |
| PVX_092815 | 0.9485  | 0.0839  | -0.3912 | -0.5877 | -0.5916 | -0.4942 | 0.2766  | 0.9684  | 1.1171  |
| PVX_095295 | -0.4686 | -0.3475 | -0.0484 | 0.4325  | 0.7736  | 0.4624  | -0.1133 | -0.5858 | -0.7004 |
| PVX_099235 | -0.0644 | 0.2296  | 0.3206  | 0.3881  | 0.3781  | 0.3592  | 0.0698  | -0.0254 | -0.095  |
| PVX_000855 | -0.3257 | -0.5657 | -0.5618 | -0.9626 | -0.7069 | 0.1313  | 0.7719  | 0.6138  | 0.0081  |
| PVX_084765 | -0.0264 | 0.4241  | 0.2856  | 0.1551  | 0.0934  | 0.2709  | -0.3558 | -0.7187 | -0.6676 |
| PVX_094730 | 0.4726  | 0.6067  | 0.9191  | 0.9295  | 0.7048  | -0.1537 | -0.4937 | -0.6007 | -0.4208 |
| PVX_079750 | -0.6657 | -0.7621 | -0.8712 | -0.5743 | -0.1998 | 0.2837  | 0.9574  | 0.9138  | 0.5572  |
| PVX_089145 | -0.2134 | 0.0936  | 0.2073  | 0.3661  | 0.2322  | -0.2128 | -0.4288 | -0.3512 | -0.4644 |
| PVX_084750 | -0.5273 | -0.4627 | -0.4307 | -0.3865 | -0.4548 | -0.6961 | 0.5645  | 0.5709  | -0.1171 |
| PVX_091935 | -0.518  | -0.118  | 0.1972  | 0.4424  | 0.4613  | 0.4563  | -0.3793 | -0.613  | -0.4622 |
| PVX_086035 | 0.6571  | 0.3     | 0.4694  | 0.4925  | 0.3855  | 0.426   | 0.4978  | 0.3965  | 0.4634  |
| PVX_079995 | 0.2823  | -0.0677 | -0.1611 | -0.1705 | 0.5327  | 0.8622  | -0.0015 | -0.4262 | -0.4419 |
| PVX_086170 | -0.3873 | 0.1346  | 0.2575  | 0.2706  | 0.3966  | 0.0825  | 0.0139  | -0.2453 | -0.4212 |
| PVX_085210 | 1.1141  | -0.0544 | -0.3695 | -0.4362 | -0.4024 | -0.4773 | 0.5186  | 1.172   | 1.4396  |
| PVX_081475 | -0.7204 | -0.3284 | -0.007  | 0.0679  | 0.2247  | 0.3595  | 0.3676  | -0.2666 | -0.4792 |
| PVX_084470 | 0.4209  | 0.1514  | 0.1824  | -0.2157 | -0.3733 | -0.3989 | 0.1521  | 0.2433  | 0.5218  |
| PVX_092835 | 0.3899  | 0.426   | 0.1817  | 0.2046  | 0.1428  | 0.3681  | 0.8121  | 0.3833  | 0.3171  |
| PVX_122890 | -0.1657 | -0.2057 | -0.175  | -0.5117 | -0.6916 | 0.1178  | -0.0579 | -0.0719 | 0.2321  |
| PVX_090030 | 0.6391  | 0.3037  | -0.0318 | -0.6266 | -0.748  | -0.9441 | -0.4112 | 0.5029  | 1.3258  |
| PVX_100975 | 0.3938  | 0.0429  | -0.0695 | -0.2648 | -0.2558 | -0.1698 | 0.2761  | 0.4467  | 0.2376  |
| PVX_080625 | -0.9947 | 0.2993  | 0.6916  | 0.7366  | 0.4236  | 0.2733  | -0.4783 | -0.8906 | -1.022  |
| PVX_115465 | 0.9215  | 0.6035  | 0.3434  | 0.0934  | -0.6138 | -1.871  | -1.607  | -0.2489 | 0.415   |

|            |         |         |         |         |         |         |         |         |         |
|------------|---------|---------|---------|---------|---------|---------|---------|---------|---------|
| PVX_089700 | -0.7686 | -1.026  | -1.0898 | -1.1437 | -1.4585 | -0.7962 | 0.0813  | 1.0878  | 0.6843  |
| PVX_090040 | 0.3696  | -0.5363 | -0.9466 | -1.2366 | -1.4708 | -1.1163 | -0.2667 | 0.2994  | 0.7666  |
| PVX_114760 | 0.6168  | -0.0373 | -0.0601 | 0.2456  | 0.2148  | -0.3737 | -0.3774 | -0.1859 | -0.0406 |
| PVX_099360 | 0.2683  | 0.3362  | 0.493   | 0.5676  | 0.5209  | 0.0496  | -0.7202 | 0.0343  | 0.296   |
| PVX_117290 | -0.4882 | 0.6932  | -1.2335 | -1.3758 | -1.7684 | -0.4739 | 0.7229  | 0.6543  | 0.4787  |
| PVX_123370 | 0.702   | -0.2169 | -0.3852 | -0.3508 | -0.4726 | 0.3342  | 0.8419  | 0.7504  | 1.0069  |
| PVX_092865 | -0.3712 | -0.3549 | -0.7356 | -1.3677 | -1.6068 | -1.3747 | 0.9495  | 1.2518  | 0.8501  |
| PVX_080610 | -0.5968 | -0.0108 | -0.1371 | -0.1502 | 0.0493  | 0.2418  | -0.0744 | -0.5909 | -0.7692 |
| PVX_085295 | 0.1641  | -0.1354 | 0.0984  | 0.139   | 0.0809  | 0.3255  | -0.286  | -0.3177 | -0.415  |
| PVX_089240 | 0.8165  | 0.1493  | -0.2016 | -0.4772 | -0.288  | -0.0879 | 0.7015  | 1.1731  | 1.2542  |
| PVX_117695 | -0.2593 | -0.5446 | -0.835  | -0.2817 | -0.4583 | -0.556  | -0.226  | 0.6473  | 0.799   |
| PVX_091580 | 0.5166  | 0.0381  | -0.4409 | -0.869  | -0.9269 | -0.8533 | 0.0587  | 0.778   | 0.7129  |
| PVX_085880 | -0.0505 | -0.3522 | -0.0537 | 0.7447  | 0.9185  | 0.3649  | -0.2851 | -0.2479 | 0.0053  |
| PVX_081730 | -0.8721 | -1.004  | -1.1456 | -1.3857 | -1.4528 | -0.1498 | 1.0685  | 1.135   | 0.5321  |
| PVX_092580 | 0.0775  | 0.5405  | 0.355   | 0.4513  | 0.1817  | -0.1199 | -0.2827 | -0.1727 | 0.2042  |
| PVX_091320 | -0.6006 | -0.4063 | 0.3138  | 0.804   | 0.7634  | 0.386   | -0.3909 | -0.4239 | -0.3375 |
| PVX_003545 | 0.8961  | 0.6587  | 0.3991  | 0.1695  | -0.6011 | -1.7365 | -1.9781 | -0.288  | 0.3279  |
| PVX_114665 | -0.8022 | -0.4373 | -0.1459 | 0.0623  | 0.1195  | 0.2984  | -0.3723 | -0.4705 | -0.4575 |
| PVX_117495 | 0.4419  | 0.4229  | 0.5054  | 0.566   | 0.3572  | 0.4011  | 0.2024  | 0.015   | -0.0157 |
| PVX_085460 | 0.1724  | 0.4413  | 0.6311  | 0.4484  | 0.4568  | 0.3784  | -0.0736 | -0.3187 | -0.5072 |
| PVX_080305 | 0.3606  | 0.1088  | -0.1076 | -0.5802 | -0.9705 | -0.8352 | -0.4495 | 0.3749  | 1.1672  |
| PVX_001940 | 0.9798  | 0.8293  | 0.7175  | 0.875   | 0.8202  | 0.9393  | 0.3709  | 0.0512  | 0.0742  |
| PVX_099415 | 0.1529  | -0.4399 | -0.6172 | -0.5926 | -0.1007 | 0.4202  | 0.2762  | 0.319   | 0.249   |
| PVX_080400 | 0.0203  | 0.2292  | 0.4416  | 0.3313  | 0.0512  | 0.0078  | -0.8211 | -1.3647 | -1.1463 |
| PVX_048690 | 0.0544  | 0.1232  | 0.1936  | 0.208   | 0.2477  | -0.1534 | -0.4112 | -0.9216 | -0.6886 |
| PVX_001830 | 0.9333  | 0.5576  | 0.1858  | -0.1683 | -0.3166 | -0.1117 | 0.2957  | 0.7232  | 1.0757  |
| PVX_088190 | 0.6891  | 0.7172  | 0.7395  | 0.6772  | 0.3731  | 0.3217  | 0.0502  | 0.1157  | 0.2139  |
| PVX_080470 | 0.2917  | 0.0257  | -0.1788 | -0.276  | -0.4888 | -0.4038 | 0.401   | 0.5753  | 0.6895  |
| PVX_114890 | -0.1177 | 0.1595  | 0.2013  | 0.3415  | 0.5122  | 0.4917  | 0.2154  | 0.3389  | -0.0579 |
| PVX_112700 | 1.0771  | 1.2128  | 0.8246  | 0.6314  | -0.2343 | -0.3961 | -0.661  | -0.31   | -0.0095 |
| PVX_099550 | -0.938  | -0.3779 | 0.2437  | 0.4683  | 0.5953  | 0.5786  | -0.0949 | -0.5694 | -0.7459 |
| PVX_101430 | -0.4637 | -0.0946 | 0.1122  | 0.4876  | 0.3336  | 0.0748  | -0.3945 | -0.6603 | -0.7219 |
| PVX_099935 | 0.6526  | 0.1584  | -0.2514 | -0.5926 | -0.8557 | -0.8027 | 0.4081  | 0.9875  | 1.2259  |
| PVX_084415 | -0.466  | -0.3193 | -0.1004 | 0.0335  | 0.3885  | 0.5315  | 0.2246  | -0.3416 | -0.387  |
| PVX_081425 | 0.0052  | -0.1336 | -0.0907 | 0.1203  | 0.5684  | 0.6767  | 0.3862  | 0.2261  | 0.2956  |
| PVX_121980 | 0.6512  | 0.7098  | 0.9033  | 0.5303  | 0.4819  | 0.1834  | -0.775  | -1.2217 | -1.0637 |
| PVX_113735 | -0.2643 | -0.2956 | -0.5382 | -0.5925 | -0.1374 | 0.1603  | 0.4735  | 0.0679  | 0.1389  |
| PVX_100790 | 0.1811  | 0.1941  | 0.2345  | 0.3089  | 0.2698  | 0.1723  | 0.0971  | -0.1021 | 0.0368  |
| PVX_089570 | 0.6417  | 0.3211  | 0.0305  | -0.6732 | -0.7615 | -1.1602 | -0.6061 | 0.4277  | 1.2938  |
| PVX_092780 | 0.6886  | -0.1993 | -0.8448 | -0.8874 | -0.017  | -0.0967 | 0.5113  | 0.6205  | 0.8708  |
| PVX_113830 | -1.7191 | -1.7836 | -2.0142 | -2.1259 | -1.9572 | -1.8047 | 0.3814  | 1.5701  | 1.2052  |
| PVX_098815 | -0.4874 | -0.4649 | -0.1989 | -0.0849 | 0.2405  | 0.6601  | 0.7401  | -0.176  | -0.7862 |
| PVX_110835 | 0.2474  | 0.1377  | 0.2498  | 0.2458  | 0.5231  | 0.4571  | -0.2823 | -0.5109 | -0.4534 |
| PVX_113750 | -0.1762 | 0.3243  | 0.3855  | 0.3836  | 0.44    | -0.1979 | -1.2382 | -1.8155 | -1.7287 |
| PVX_089390 | -0.8703 | -1.2327 | -1.5845 | -1.6278 | -0.1111 | 0.7308  | 0.5289  | -0.0372 | 0.0396  |
| PVX_084995 | 0.334   | 0.0224  | 0.0829  | 0.1212  | 0.4741  | 0.6729  | 0.2337  | 0.0793  | 0.0532  |
| PVX_085320 | -0.488  | 0.151   | 0.2394  | 0.2437  | 0.1881  | 0.2726  | -0.0046 | -0.3264 | -0.2472 |
| PVX_081700 | -0.6305 | -0.5666 | -0.3888 | -0.0628 | -0.2011 | -0.1828 | -0.2814 | 0.3571  | 0.2499  |
| PVX_090175 | 0.439   | 0.6401  | 0.5528  | 0.5839  | 0.7035  | -0.0633 | -0.8491 | -1.205  | -1.0725 |
| PVX_111545 | -1.1246 | -0.8809 | -0.8991 | -0.9403 | -0.7702 | -0.3647 | -0.7729 | 0.2261  | 0.3679  |
| PVX_092740 | 0.942   | 0.9353  | 0.749   | 0.9328  | 0.4877  | -0.4012 | -1.046  | -1.0655 | -0.5477 |
| PVX_097810 | 0.3963  | 0.4362  | 0.4426  | 0.495   | 0.3664  | 0.016   | -0.2015 | -0.3596 | -0.3991 |
| PVX_021680 | 0.4673  | 0.3293  | 0.2994  | 0.0865  | 0.0343  | 0.0039  | -0.1279 | 0.1488  | 0.1414  |
| PVX_113270 | 0.4416  | 0.3788  | 0.361   | 0.4843  | 0.3929  | -0.102  | -0.5872 | -0.7549 | -0.6357 |
| PVX_089435 | 0.1364  | -0.0314 | -0.0035 | -0.305  | -0.2702 | -0.268  | -0.9578 | 0.4654  | 0.6871  |
| PVX_085915 | -1.273  | -0.6878 | -0.6679 | -0.3783 | -0.0795 | 1.1366  | 0.4609  | -0.7257 | -0.6489 |
| PVX_083065 | 0.4865  | 0.071   | -0.0524 | -0.0199 | 0.2034  | 0.4032  | 0.1566  | -0.0723 | -0.0162 |
| PVX_009595 | 0.3013  | 0.1401  | 0       | -0.2003 | -0.0576 | -0.2322 | -0.3492 | -0.3014 | -0.3345 |
| PVX_114315 | -0.0468 | -0.2178 | -0.2009 | -0.1608 | -0.1854 | -0.2171 | -0.5527 | -0.96   | -1.0166 |
| PVX_117300 | -0.2255 | -0.2625 | 0.0869  | 0.3045  | 0.4436  | 0.1685  | -0.0775 | 0.0283  | 0.1809  |
| PVX_099435 | -0.5174 | -0.2779 | 0.1803  | 0.5934  | 0.5706  | 0.7253  | 0.29    | -0.0136 | -0.0268 |
| PVX_089045 | -0.4527 | -0.3728 | -0.5078 | -0.8221 | -0.5264 | -0.1232 | 1.1224  | 0.6747  | 0.5608  |
| PVX_084420 | 0.7299  | 0.4162  | 0.2685  | -0.4306 | -0.8024 | -0.3829 | -0.3226 | 0.2831  | 1.6575  |

|            |         |         |         |         |         |         |         |         |         |
|------------|---------|---------|---------|---------|---------|---------|---------|---------|---------|
| PVX_088864 | -0.0675 | 0.0587  | 0.2872  | 0.4287  | 0.4071  | 0.4741  | 0.5938  | 0.5473  | 0.1643  |
| PVX_119815 | -0.172  | 0.4464  | 0.5275  | 0.36    | 0.3928  | 0.3835  | -0.0698 | -0.1719 | -0.0152 |
| PVX_092380 | -1.895  | -2.0086 | -2.262  | -2.067  | -2.3871 | -2.1603 | 0.9067  | 1.0092  | -0.1378 |
| PVX_097855 | 0.7336  | 0.7864  | 0.3198  | 0.0151  | -0.103  | 0.1791  | 0.4418  | 0.1442  | -0.0338 |
| PVX_090185 | 0.4055  | 0.0536  | 0.3883  | 0.3708  | 0.0897  | 0.26    | -0.0469 | 0.4841  | 0.8833  |
| PVX_101210 | -0.4423 | -0.0051 | 0.1187  | 0.5046  | 0.715   | 0.9427  | 0.3414  | -0.2804 | -0.0019 |
| PVX_001005 | -0.272  | -0.6212 | -0.6502 | -0.4092 | -0.035  | 0.0889  | 1.1715  | 1.2109  | 0.4783  |
| PVX_101280 | 0.7958  | 0.3794  | -0.0514 | -0.5111 | -0.7797 | -0.6673 | 0.0558  | 0.6866  | 1.2268  |
| PVX_000725 | 0.6702  | 0.7201  | 0.3353  | -0.206  | -0.3717 | -0.5071 | -0.1753 | 0.4139  | 1.2925  |
| PVX_026190 | 0.0668  | 0.2204  | 0.4274  | 0.282   | 0.4368  | 0.2662  | -0.1578 | -0.2904 | -0.5134 |
| PVX_091820 | 0.3931  | 0.3764  | 0.5287  | 0.636   | 0.5343  | 0.3111  | -0.1641 | -0.5009 | -0.3437 |
| PVX_089105 | 0.2762  | -0.0488 | -0.3136 | -0.4336 | -0.3025 | -0.4298 | 0.3125  | 0.8485  | 1.2077  |
| PVX_110960 | 0.399   | 0.6687  | 0.5284  | 0.4054  | 0.2798  | 0.1414  | -0.5082 | -0.6574 | -0.624  |
| PVX_101345 | 0.5159  | 0.8642  | 0.709   | 0.6065  | 0.2296  | -0.0336 | -0.4703 | -0.376  | -0.2007 |
| PVX_084365 | 0.9532  | 0.8268  | 0.9062  | 0.8566  | 0.4116  | -0.0817 | 0.1163  | -0.1516 | 0.2483  |
| PVX_090260 | -0.3242 | -0.2308 | -0.4094 | -0.5654 | -0.2678 | 0.6745  | 0.2524  | 0.302   | 0.4204  |
| PVX_082980 | -0.2805 | 0.6514  | 0.5987  | 0.3114  | 0.1325  | 0.0939  | -0.0184 | -0.1156 | -0.0446 |
| PVX_122580 | 0.3739  | 0.1907  | 0.014   | -0.1072 | -0.0198 | -0.286  | 0.0342  | 0.1659  | 0.2243  |
| PVX_098685 | 0.4115  | -0.5814 | -0.2326 | -0.0023 | 0.3559  | 0.1699  | -0.0152 | 0.515   | 0.8049  |
| PVX_095310 | 1.157   | 0.3886  | -0.275  | -0.7081 | -1.0357 | -0.352  | 0.2983  | 1.1349  | 1.6548  |
| PVX_098675 | -0.6231 | -0.3254 | -0.205  | -0.054  | -0.0911 | -0.0859 | 0.5442  | 0.7478  | 0.4901  |
| PVX_115420 | 0.1811  | 0.3021  | 0.3474  | 0.4008  | 0.4437  | 0.3019  | 0.476   | 0.0921  | -0.2481 |
| PVX_081370 | -1.1124 | -1.0728 | -1.0053 | -0.8406 | -0.5253 | -0.3547 | -0.4963 | -0.8176 | -1.6404 |
| PVX_079725 | 0.5509  | 0.111   | -0.237  | -0.3407 | -0.4066 | -0.375  | 0.0121  | 0.6575  | 1.1194  |
| PVX_119800 | -0.3827 | 0.2511  | 0.4304  | 0.3492  | -0.0434 | -0.0318 | 0.2639  | 0.3605  | 0.0324  |
| PVX_101535 | -0.3992 | -0.9351 | -0.9759 | -1.0389 | -1.0573 | -1.0981 | -0.8372 | 0.4523  | 0.4203  |
| PVX_081825 | -0.3892 | -0.5094 | -0.4916 | -0.5094 | -0.5702 | -0.5083 | 0.9594  | 1.4426  | 0.7838  |
| PVX_123975 | -0.4849 | -0.4552 | -0.5287 | -0.4926 | -0.4934 | 0.8725  | 1.0243  | 0.5236  | -0.0007 |
| PVX_094765 | 0.3592  | 0.0477  | 0.1307  | 0.219   | 0.1427  | -0.0923 | -0.0468 | -0.0719 | 0.0518  |
| PVX_117025 | 0.4879  | 0.2604  | 0.3454  | 0.2557  | 0.2996  | 0.025   | -0.2377 | -0.7617 | -0.7268 |
| PVX_080140 | 0.4312  | 0.438   | 0.183   | 0.1608  | 0.1715  | 0.2147  | -0.2694 | -0.156  | 0.195   |
| PVX_122545 | -0.8993 | -0.6724 | -0.5961 | -0.5697 | -0.3433 | 0.0362  | 0.5802  | 0.2662  | -0.4145 |
| PVX_094300 | 0.1276  | -0.1471 | -0.3174 | -0.3853 | -0.5825 | -1.2229 | -1.7681 | 0.3763  | 0.6822  |
| PVX_094650 | -1.3362 | -1.2989 | -1.3521 | -1.1448 | -1.2869 | -1.3395 | -0.6116 | 1.3317  | 1.3481  |
| PVX_087835 | -0.8277 | -1.2583 | -0.9096 | 0.1443  | 0.7093  | 0.2391  | -0.6559 | -0.6897 | -0.5173 |
| PVX_092775 | -0.2256 | 0.372   | 0.4936  | 0.2286  | 0.3738  | -0.1082 | -0.8419 | -0.6324 | -0.7217 |
| PVX_111560 | 0.5952  | 0.3973  | 0.4543  | 0.5185  | 0.2913  | 0.1305  | 0.0295  | 0.098   | 0.0889  |
| PVX_095225 | 1.0164  | 0.7654  | 0.3887  | 0.2782  | 0.1368  | 0.0247  | 0.091   | 0.6134  | 1.0089  |
| PVX_091180 | -0.3736 | -0.1718 | 0.1398  | 0.6307  | 0.5348  | 0.454   | 0.3209  | -0.0076 | -0.2986 |
| PVX_085055 | -0.0855 | -0.0647 | 0.0983  | 0.2212  | 0.3092  | 0.831   | 0.4594  | -0.1047 | -0.3843 |
| PVX_000555 | 0.4435  | -0.0974 | -0.4927 | -0.6581 | -0.3756 | -0.1546 | 0.4342  | 0.9425  | 0.9928  |
| PVX_112695 | 0.6192  | 0.2895  | 0.1174  | 0.1513  | 0.2961  | -0.0116 | -0.1581 | -0.4216 | -0.216  |
| PVX_094295 | 0.113   | -0.3343 | -0.9089 | -1.3616 | -1.7059 | -2.2045 | -1.9548 | 0.7349  | 1.2748  |
| PVX_002660 | -0.254  | 0.5232  | 0.5251  | 0.4623  | 0.2016  | 0.2225  | -0.0481 | -0.1803 | -0.1021 |
| PVX_118005 | -0.126  | -0.2473 | -0.4021 | -0.4001 | -0.5783 | 0.4068  | 1.0947  | 0.6691  | 0.5005  |
| PVX_096410 | 0.4636  | 0.1797  | 0.2024  | 0.0003  | 0.0474  | 0.0967  | 0.429   | 0.5076  | 0.5759  |
| PVX_114965 | -0.4638 | 0.3195  | 0.498   | 0.4871  | 0.4234  | 0.6073  | -0.0146 | -0.1774 | -0.2472 |
| PVX_123685 | -0.3796 | -0.4445 | -0.1662 | 0.3476  | 0.4038  | 0.7072  | 1.1112  | 0.7493  | 0.3841  |
| PVX_091385 | -0.54   | -0.7458 | -0.9217 | -0.773  | -0.0858 | 0.4913  | 1.1039  | 0.557   | 0.011   |
| PVX_085425 | -0.3841 | 0.3008  | 0.443   | 0.4129  | 0.3513  | -0.1547 | 0.634   | 0.8493  | 0.3527  |
| PVX_086185 | 0.239   | 0.4533  | 0.3021  | 0.3413  | 0.2475  | 0.0228  | -0.3349 | -0.1643 | 0.194   |
| PVX_088100 | 0.2059  | 0.2773  | 0.2262  | 0.1466  | -0.0266 | -0.0827 | -0.175  | -0.1518 | 0.0063  |
| PVX_124145 | 0.4127  | 0.1937  | -0.0997 | -0.5959 | -0.8422 | -0.8056 | -0.2894 | 0.372   | 1.126   |
| PVX_097905 | -0.2461 | 0.078   | -0.0291 | -0.1495 | -0.3435 | -0.3044 | 0.5438  | 0.1828  | -0.0161 |
| PVX_003485 | 0.9377  | 0.4338  | 0.2923  | 0.234   | 0.0987  | -0.4947 | -0.8746 | -0.5538 | -0.2613 |
| PVX_122035 | 1.0918  | 0.2185  | -0.202  | -0.3407 | -0.3716 | -0.3217 | 0       | 0.7432  | 1.7383  |
| PVX_080010 | -0.4465 | 0.1243  | 0.2088  | 0.3098  | 0.5176  | 0.0414  | -0.3528 | -0.3999 | -0.3994 |
| PVX_116750 | 0.3738  | 0.0306  | -0.0864 | -0.2374 | -0.4377 | -0.3138 | 0.0437  | 0.3431  | 0.9372  |
| PVX_000795 | 0.265   | 0.0682  | 0.1084  | 0.0507  | 0.0693  | 0.1695  | 0.1256  | -0.1225 | 0.037   |
| PVX_112690 | -1.4491 | 1.1631  | 1.5484  | 0.2877  | -1.7233 | -2.5673 | -2.3288 | -2.0032 | -1.7004 |
| PVX_091950 | -1.2634 | -1.183  | -1.0732 | -0.8417 | -0.4068 | -0.2043 | 0.3814  | 1.0379  | 0.2347  |
| PVX_081460 | -0.3585 | -0.4537 | -0.8258 | -1.2262 | -1.1417 | -0.4081 | 0.7357  | 0.3682  | 0.186   |
| PVX_117940 | -0.287  | -0.013  | 0.7339  | 1.641   | 0.5084  | 0.0171  | -0.4108 | -0.5022 | -0.3256 |

|            |         |         |         |         |         |         |         |         |         |
|------------|---------|---------|---------|---------|---------|---------|---------|---------|---------|
| PVX_089445 | 0.3584  | 0.9492  | 0.7019  | 0.1988  | -0.1497 | -0.68   | -0.8377 | 0.8848  | 0.8776  |
| PVX_003615 | 0.5157  | 0.182   | 0.1482  | 0.0341  | 0.0811  | 0.098   | -0.6242 | -0.6653 | -0.2796 |
| PVX_119700 | -0.4837 | -0.2424 | -0.0324 | 0.2322  | 0.4413  | -0.0366 | -0.1105 | -0.4235 | -0.5291 |
| PVX_116540 | -0.1618 | 0.0693  | 0.0045  | -0.0878 | 0.1089  | 0.4314  | 0.1152  | -0.1374 | -0.3067 |
| PVX_122670 | 0.1732  | 0.4134  | 0.4255  | 0.4686  | 0.4458  | 0.2952  | -0.0583 | -0.5095 | -0.3719 |
| PVX_123225 | 0.1613  | 0.0215  | -0.1382 | -0.202  | -0.3332 | -0.2184 | 0.7276  | 1.4135  | 1.1243  |
| PVX_099255 | 0.0384  | 0.409   | 0.4167  | 0.1569  | -0.1122 | -0.5185 | -0.2708 | 0.0719  | 0.4556  |
| PVX_080275 | 0.282   | 0.3974  | 0.6774  | 0.3448  | 0.1098  | -0.2123 | -1.0427 | -1.3645 | -1.4752 |
| PVX_090190 | -0.5087 | -1.0037 | -1.5504 | -1.5448 | 0.0133  | 0.0534  | 0.161   | -0.1306 | -0.3337 |
| PVX_081505 | -0.7874 | -0.0514 | 0.375   | 0.5994  | 0.3898  | -0.0952 | -0.6885 | -0.5671 | -0.3721 |
| PVX_083430 | 0.1304  | 0.617   | 0.7466  | 1.0318  | 0.8917  | 0.3097  | -0.0965 | 0.1097  | 0.1457  |
| PVX_099945 | -0.8998 | -0.809  | -0.159  | 0.206   | 0.5953  | 0.7862  | 0.049   | -0.5575 | -0.7934 |
| PVX_090970 | 0.581   | 0.3269  | 0.3429  | 0.3681  | 0.3935  | 0.12    | -0.0129 | -0.4748 | -0.251  |
| PVX_085760 | 0.9253  | 0.7155  | 0.4226  | 0.2294  | -0.0827 | 0.531   | 0.0814  | -0.1023 | -0.1664 |
| PVX_092560 | -0.0622 | -0.7558 | -0.9022 | -0.7957 | -0.5882 | -0.2506 | 0.3424  | 0.216   | -0.168  |
| PVX_122130 | -0.0041 | 0.2109  | 0.3423  | 0.5361  | 0.4426  | 0.1758  | -0.1047 | -0.4199 | -0.5786 |
| PVX_122690 | 0.1601  | 0.3652  | 0.3582  | 0.1464  | -0.0213 | 0.6924  | 0.2412  | -0.9133 | -0.8063 |
| PVX_115360 | -0.7199 | -1.205  | -0.4275 | 0.343   | 0.0601  | 0.7375  | 0.4401  | -0.3349 | -0.3553 |
| PVX_101420 | -0.7474 | 0.1238  | 0.3085  | 0.3556  | 0.3063  | 0.0466  | -0.1714 | -0.3635 | -0.5643 |
| PVX_115085 | 0.4981  | 0.2987  | 0.1474  | -0.4622 | -0.6337 | -0.8596 | -0.3566 | 0.5775  | 1.4214  |
| PVX_087125 | 1.2269  | 0.7809  | 0.2275  | -0.3067 | -0.2965 | -0.5081 | 0.5812  | 1.3619  | 1.5579  |
| PVX_115205 | 0.2469  | 0.2037  | 0.271   | 0.4491  | 0.7161  | 1.054   | 0.8184  | 0.6149  | 0.5453  |
| PVX_083155 | -0.3219 | -0.376  | -0.3914 | 0.0586  | 0.3911  | 0.6755  | 0.429   | -0.3211 | -0.863  |
| PVX_089730 | 0.4586  | 0.611   | 0.6965  | 0.4679  | 0.3825  | 0.5365  | 0.2852  | 0.4972  | 0.4383  |
| PVX_096400 | -0.494  | -0.2016 | -0.1389 | 0.1211  | 0.4586  | 0.3173  | -0.017  | -0.2805 | -0.5003 |
| PVX_000825 | -1.0496 | -0.7993 | 0.4358  | 0.7987  | 0.9587  | 0.1252  | -0.5704 | -0.85   | -0.7126 |
| PVX_086220 | 0.223   | 0.1917  | -0.153  | 0.3437  | 0.5399  | 0.3514  | 0.4636  | 0.3181  | 0.593   |
| PVX_092440 | -0.1424 | -0.1889 | -0.1902 | -0.118  | -0.42   | 0.0993  | 0.3107  | 0.0651  | -0.0152 |
| PVX_090045 | -0.7364 | 0.109   | 0.5629  | 0.3876  | 0.6809  | 0.2355  | -0.3307 | -0.3825 | -0.2305 |
| PVX_099990 | 0.2985  | 0.4123  | 0.157   | 0.0265  | -0.1722 | -0.5437 | 0.6552  | 0.984   | 0.3353  |
| PVX_090035 | 0.0061  | -0.3589 | -0.8346 | -1.3279 | -1.2109 | -1.087  | 1.0335  | 0.7624  | 0.5774  |
| PVX_099805 | -0.0447 | -0.2698 | -0.1868 | -0.1501 | -0.1568 | -0.2463 | -0.3489 | -0.0365 | 0.067   |
| PVX_081530 | 0.005   | 0.3445  | 0.3359  | 0.3968  | 0.4501  | 0.0257  | -0.5871 | -0.7493 | -1.0924 |
| PVX_111565 | 1.263   | 1.1377  | 0.6201  | 0.4698  | -0.1225 | -0.8405 | -1.0653 | -1.0223 | -0.6058 |
| PVX_082925 | 0.0862  | 0.1651  | 0.1477  | 0.1189  | 0.0981  | 0.2978  | -0.0606 | -0.705  | -0.8009 |
| PVX_122085 | -0.1656 | -0.8656 | -1.1715 | -1.015  | -0.1852 | -0.0688 | -0.1683 | -0.111  | -0.1845 |
| PVX_123330 | -0.0028 | 0.2087  | -0.1843 | 0.0024  | 0.0634  | 0.9292  | 0.3088  | -0.4412 | -0.5535 |
| PVX_123065 | 0.4734  | 0.5213  | 0.4614  | 0.1481  | 0.0451  | -0.2836 | -0.4168 | 0.2338  | 0.8434  |
| PVX_122430 | 0.1303  | 0.3496  | 0.3213  | 0.4647  | 0.5692  | 1.2456  | 0.7692  | 0.0149  | -0.0119 |
| PVX_088810 | -0.9978 | -1.174  | -1.5191 | -1.8464 | -1.9244 | -1.8627 | -1.0903 | 1.3023  | 1.5518  |
| PVX_081260 | 0.1428  | 0.3627  | -0.1056 | -0.3744 | -0.2125 | -0.4737 | -0.6623 | -0.4349 | -0.2501 |
| PVX_083260 | 0.0349  | -0.0286 | 0.0855  | -0.0568 | 0.0461  | -0.4855 | -1.2718 | -1.6746 | -1.2941 |
| PVX_087730 | 0.6919  | 0.0437  | -0.1764 | -0.5419 | -1.2203 | -0.1914 | 0.2175  | 0.8805  | 1.3105  |
| PVX_080585 | 0.1027  | -0.234  | -0.4467 | -0.0538 | -0.3793 | 0.4626  | 1.1594  | 1.158   | 0.6615  |
| PVX_003620 | 0.3756  | 0.2853  | 0.083   | 0.005   | -0.0896 | -0.5505 | -0.3803 | 0.085   | 0.9988  |
| PVX_122905 | -1.0525 | -0.8532 | 0.2954  | 0.9982  | 1.095   | 0.0382  | -1.064  | -1.127  | -0.7108 |
| PVX_115325 | 0.427   | 0.5994  | 0.6671  | 0.7863  | 0.5057  | 0.2852  | -0.0807 | -0.1252 | 0.0794  |
| PVX_092850 | -1.464  | -0.7413 | -0.5018 | -0.3784 | -0.2864 | 0.3193  | 0.3354  | -0.0734 | -0.6545 |
| PVX_092795 | 1.2836  | 0.9462  | 0.6288  | 0.4141  | 0.0832  | -0.4616 | -0.5177 | 0.6269  | 0.604   |
| PVX_096320 | 0.1901  | 0.4518  | 0.5915  | 0.8238  | 0.8158  | 0.4301  | -0.0662 | -0.4172 | -0.3442 |
| PVX_091575 | 0.3177  | 0.1814  | -0.2067 | -0.3589 | -0.3947 | -0.3204 | 0.2486  | 0.5471  | 0.9021  |
| PVX_000765 | 0.127   | 0.3228  | 0.0599  | -0.2172 | -0.3481 | -0.1108 | -0.1785 | -0.6868 | -0.3533 |
| PVX_092120 | 0.4851  | 0.4863  | 0.6234  | 0.4915  | 0.2649  | 0.1992  | -0.8823 | -1.6895 | -1.7172 |
| PVX_096195 | 1.1223  | 0.6097  | 0.248   | -0.181  | -0.3623 | -0.3036 | 0.0385  | 0.9978  | 0.9915  |
| PVX_099780 | 0.0169  | 0.1579  | 0.1118  | 0.0465  | 0.0801  | 0.2699  | 0.5095  | 0.2015  | -0.1637 |
| PVX_100780 | 1.0313  | 0.911   | -0.0281 | -0.233  | -0.2896 | -0.2638 | 0.6395  | 1.2115  | 1.3863  |
| PVX_100845 | 0.2652  | -0.0095 | -0.045  | -0.4099 | -0.4273 | -1.0331 | -0.94   | -0.7142 | -0.6217 |
| PVX_083295 | 0.5084  | 0.0099  | -0.4296 | -0.741  | -1.0723 | -0.3809 | 0.3246  | 0.5087  | 0.5968  |
| PVX_113820 | 0.0245  | 0.2941  | 0.3695  | 0.1684  | 0.1482  | 0.0051  | 0.1301  | -0.1358 | -0.1409 |
| PVX_099290 | 0.2594  | -0.2208 | -0.3611 | -0.376  | -0.0381 | 0.3392  | 0.6394  | 0.7262  | 0.6118  |
| PVX_000645 | -0.7826 | -1.0102 | -0.8425 | -0.4516 | 0.3608  | 1.3389  | 1.1817  | 0.5257  | 0.2234  |
| PVX_091600 | 0.6518  | 0.9039  | 0.8189  | 0.6934  | 0.4881  | -0.3827 | -0.5321 | -0.3466 | -0.3285 |
| PVX_000565 | -0.3836 | 0.022   | -0.1015 | -0.3005 | -0.5355 | -0.3981 | -0.2055 | -0.3841 | -0.707  |



|            |         |         |         |         |         |         |         |         |         |
|------------|---------|---------|---------|---------|---------|---------|---------|---------|---------|
| PVX_113510 | -0.1483 | 0.2081  | 0.5675  | 0.7135  | 0.5978  | 0.0247  | -0.1727 | -0.3438 | -0.3906 |
| PVX_123625 | -0.0815 | 0.3744  | 0.3746  | 0.4297  | 0.3108  | 0.0779  | -0.1836 | -0.4996 | -0.5559 |
| PVX_083440 | 0.7213  | 0.4686  | 0.3705  | 0.1406  | 0.2133  | 0.2114  | 0.2856  | 0.1425  | 0.2343  |
| PVX_094750 | 0.2768  | 0.7105  | 0.7791  | 0.6106  | 0.6036  | 0.3004  | -0.5876 | -1.1303 | -1.0033 |
| PVX_093495 | -0.333  | -0.381  | -0.1982 | -0.3417 | -0.3394 | -0.1898 | -0.4766 | 0.3607  | 0.5946  |
| PVX_002765 | 0.241   | 0.1333  | 0.1783  | 0.0854  | -0.2428 | -0.1415 | -0.3532 | -0.4465 | -0.2729 |
| PVX_116665 | -1.4984 | -2.3212 | -2.1586 | -1.3811 | -0.1662 | 0.5806  | 0.4808  | -0.5354 | -0.9413 |
| PVX_085615 | 0.5682  | 0.4223  | 0.0918  | -0.4214 | -0.5898 | -0.4952 | 0.0231  | 0.6462  | 1.2013  |
| PVX_098620 | 0.5044  | 0.066   | 0.2462  | 0.4949  | 0.4244  | 0.4392  | 0.4567  | 0.071   | 0.0939  |
| PVX_092145 | -0.0158 | 0.1811  | 0.2243  | 0.063   | -0.1594 | -0.0997 | -0.1202 | 0.2148  | 0.2557  |
| PVX_114255 | 0.0045  | 0.3442  | 0.4921  | 0.6167  | 0.7798  | 0.3138  | -0.0117 | -0.6525 | -0.5381 |
| PVX_094785 | -0.4445 | -0.8195 | -1.005  | -0.6199 | 0.1689  | 0.8236  | -0.0037 | -0.3685 | -0.4076 |
| PVX_090995 | -0.8906 | 0.1585  | 0.5755  | 0.6667  | 0.5544  | 0.3794  | -0.4859 | -0.578  | -0.7346 |
| PVX_094400 | 0.231   | 0.3234  | 0.4889  | 0.3524  | 0.2002  | 0.1795  | -0.4636 | -1.0579 | -1.0361 |
| PVX_001795 | 0.3057  | 0.5485  | 0.4958  | 0.2311  | 0.3302  | 0.5326  | 0.5955  | 0.4474  | 0.1759  |
| PVX_122675 | -0.3782 | -1.0545 | -1.5324 | -1.1114 | -0.0745 | 0.6176  | 0.7093  | 0.276   | 0.3211  |
| PVX_099770 | -0.1257 | 0.3059  | 0.5189  | 0.5052  | 0.4055  | 0.4436  | 0.333   | 0.1377  | 0.1678  |
| PVX_123780 | -0.1296 | -0.3238 | -0.689  | -0.6516 | -0.581  | 0.1151  | 0.9732  | 0.892   | 0.5895  |
| PVX_099555 | -0.1309 | -0.0658 | 0.4567  | 0.5144  | 0.0495  | 0.821   | 0.1167  | 0.0114  | 0.0322  |
| PVX_002965 | -0.2948 | 0.1104  | 0.3137  | 0.4584  | 0.5316  | 0.2455  | -0.3122 | -0.4294 | -0.2903 |
| PVX_102645 | 0.0766  | 0.2869  | 0.3512  | 0.465   | 0.4885  | 0.7613  | 0.5667  | -0.0264 | 0.0604  |
| PVX_117800 | -0.5346 | 0.1112  | 0.2068  | 0.2017  | 0.1621  | 0.1595  | 0.9234  | 0.7794  | 0.2135  |
| PVX_096985 | 0.1821  | 0.1671  | -0.0787 | -0.3359 | -0.8164 | -0.244  | -0.1531 | -0.7513 | -0.5246 |
| PVX_085790 | 0.8559  | 0.0307  | -0.1651 | -0.7499 | -0.8642 | -0.4775 | 0.2957  | 0.813   | 0.9802  |
| PVX_089315 | -0.3142 | -0.0327 | 0.1039  | 0.449   | 0.6308  | 0.7085  | 0.6731  | 0.5959  | 0.467   |
| PVX_089865 | -1.4895 | -0.6851 | -0.9829 | -0.9529 | -1.0324 | -1.1066 | -1.3734 | 0.8228  | 1.1825  |
| PVX_080455 | 0.3403  | 0.6635  | 0.6734  | 0.5842  | 0.4606  | -0.1989 | -0.4154 | -0.3025 | -0.1333 |
| PVX_117320 | -0.9607 | 0.0589  | 0.1599  | 0.398   | 0.0672  | 0.0179  | -0.6119 | -0.6791 | -0.3826 |
| PVX_118370 | -0.0774 | -0.4108 | -0.1864 | 0.0515  | -0.2143 | 0.2115  | 0.1389  | -0.1456 | -0.0836 |
| PVX_095170 | -0.2999 | -0.3469 | 0.0575  | 0.2527  | 0.1723  | -0.1823 | 0.2986  | 0.3727  | 0.3425  |
| PVX_122855 | -0.743  | 0.3441  | 0.5368  | 0.5931  | 0.3049  | -0.2854 | -0.8723 | -1.0165 | -1.0396 |
| PVX_099470 | 0.0421  | 0.0671  | 0.0469  | 0.0147  | -0.0513 | 0.0251  | 0.2496  | -0.3062 | 0.3355  |
| PVX_122280 | 0.4782  | 0.237   | 0.2035  | 0.1797  | 0.3117  | 0.2844  | 0.074   | -0.2068 | -0.1517 |
| PVX_119790 | 0.6647  | 0.5081  | 0.2048  | 0.3111  | 0.1592  | -0.0632 | 0.2291  | 0.4266  | 0.533   |
| PVX_086250 | -0.0604 | -0.3573 | -0.7868 | -0.8968 | -0.7228 | 0.5772  | 0.9534  | 0.4473  | 0.5488  |
| PVX_110915 | -0.9333 | -1.1382 | -1.2708 | -1.403  | -1.1571 | -1.2649 | -0.3686 | 1.1771  | 0.9338  |
| PVX_116910 | -0.008  | 0.168   | 0.0857  | 0.2572  | 0.4773  | 0.2971  | 0.1423  | -0.0018 | 0.1556  |
| PVX_083495 | 0.3748  | 0.6549  | 0.6104  | 0.6209  | 0.0724  | -0.0276 | -0.327  | -0.0787 | -0.017  |
| PVX_003515 | -0.893  | -0.9683 | -1.0293 | -1.3506 | -1.3761 | -1.1531 | -1.4526 | 1.0428  | 1.2998  |
| PVX_086110 | -0.5816 | -0.2893 | 0.0607  | 0.272   | 0.6154  | -0.0838 | -0.569  | -0.7701 | -0.5099 |
| PVX_001720 | -0.2867 | -0.8596 | -0.2908 | 0.2617  | 0.6808  | 0.4912  | -0.2626 | -0.0413 | 0.267   |
| PVX_001000 | -0.4157 | -0.4193 | -0.2151 | -0.2852 | 0.2571  | -0.1817 | 0.0132  | 0.0749  | -0.1451 |
| PVX_099020 | -1.2089 | -1.1394 | -0.2484 | 0.4354  | 0.6718  | 1.3778  | 0.4106  | -0.5268 | -0.8205 |
| PVX_090060 | 0.1373  | 0.3757  | 0.3224  | 0.3006  | 0.4498  | 0.5156  | -0.0363 | -0.3609 | -0.4015 |
| PVX_123105 | 0.037   | -0.4537 | -0.4609 | -0.0781 | -0.2769 | 0.1584  | 0.077   | -0.6576 | -0.6867 |
| PVX_084910 | -0.0623 | -0.4578 | -0.9098 | -0.9714 | -0.9543 | -0.3711 | 0.8424  | 0.8226  | 0.6163  |
| PVX_092290 | 0.1098  | 0.2905  | 0.3756  | 0.4415  | 0.1331  | -0.0042 | -0.4348 | -0.7046 | -0.6927 |
| PVX_089690 | 0.5346  | 0.0998  | 0.0973  | -0.0276 | -0.1855 | -0.3844 | 0.004   | 0.3974  | 0.7585  |
| PVX_082585 | 0.424   | 0.0498  | 0.1703  | 0.4681  | 0.3228  | 0.5247  | 0.4576  | -0.0557 | 0.131   |
| PVX_083205 | -0.0729 | -0.0982 | -0.1571 | -0.063  | 0.3317  | 0.9864  | 0.2417  | -0.5037 | -0.5482 |
| PVX_092925 | -0.7023 | -1.2342 | -1.3409 | -0.4109 | 0.1981  | 0.3711  | 0.9724  | 0.6893  | 0.351   |
| PVX_104700 | 0.1016  | 0.1016  | 0.1794  | 0.3809  | 0.1825  | 0.2732  | 0.0471  | 0.1515  | -0.1925 |
| PVX_003665 | -0.7722 | 0.6226  | 0.6775  | 0.8466  | -0.0063 | -0.8952 | -0.9462 | -1.0556 | -1.0311 |
| PVX_114500 | -0.0924 | -0.1243 | -0.1988 | -0.0375 | -0.2034 | -0.527  | -0.767  | -0.8467 | -0.4876 |
| PVX_085510 | 0.502   | 0.4263  | 0.5169  | 0.2536  | 0.0845  | 0.2664  | 0.2877  | 0.2726  | -0.173  |
| PVX_110300 | 1.051   | 0.6912  | 0.3432  | -0.0087 | -0.4286 | -0.3818 | -0.4756 | -0.4409 | -0.203  |
| PVX_099635 | 0.2143  | 0.0621  | -0.0024 | -0.1014 | 0.1688  | 0.5298  | 0.5392  | 0.4598  | 0.0999  |
| PVX_117530 | 0.1451  | -0.543  | -0.1414 | 0.1409  | 0.546   | 0.1237  | -0.0762 | 0.2251  | 0.5483  |
| PVX_122045 | 0.2505  | -0.3615 | -0.3072 | 0.1675  | 0.1745  | 0.9774  | 0.3396  | 0.733   | 0.9162  |
| PVX_122770 | 0.4811  | -0.0535 | -0.2218 | -0.3584 | -0.3807 | -0.2936 | 0.2368  | 0.4126  | 0.6214  |
| PVX_091675 | 0.4885  | 0.2199  | 0.1763  | 0.032   | -0.0935 | 0.3606  | 0.2732  | -0.2469 | -0.1557 |
| PVX_085930 | -1.7915 | -1.8311 | -1.9847 | -2.2689 | -2.3281 | -1.8686 | 1.2466  | 1.6098  | 0.546   |
| PVX_096285 | 0.259   | 0.4355  | 0.6202  | 0.6402  | 0.6214  | 0.6821  | 0.4831  | 0.3066  | 0.1146  |

|            |         |         |         |         |         |         |         |         |         |
|------------|---------|---------|---------|---------|---------|---------|---------|---------|---------|
| PVX_117255 | 1.1945  | 0.7302  | 0.4881  | 0.3791  | 0.243   | 0.1303  | 0.0633  | 0.0798  | 0.3831  |
| PVX_101580 | 1.9795  | 0.9957  | 0.4631  | -0.3778 | -1.5073 | -2.0117 | -1.8963 | -1.1853 | -0.2797 |
| PVX_090155 | 0.1701  | 0.0169  | -0.1607 | 0.0226  | 0.3171  | 0.316   | 0.023   | 0.008   | 0.268   |
| PVX_096315 | 0.3299  | 0.5409  | 0.6589  | 0.7141  | 0.553   | 0.2406  | 0.1615  | -0.2935 | -0.113  |
| PVX_123655 | -0.5224 | -0.7572 | -0.8483 | -0.8312 | -0.8687 | 0.3863  | 0.9687  | 0.5079  | 0.1117  |
| PVX_090895 | 0.1274  | 0.2078  | 0.2389  | 0.4385  | 0.3737  | 0.4682  | 0.1559  | -0.1675 | -0.4165 |
| PVX_090310 | 0.2818  | 0.2742  | 0.2812  | 0.1156  | 0.3296  | 0.0143  | -0.142  | 0.2642  | 0.6833  |
| PVX_079710 | -0.2765 | -0.6129 | -0.647  | -0.8769 | -1.1157 | -0.8826 | 1.0403  | 1.1524  | 0.6858  |
| PVX_000650 | 0.339   | -0.0383 | 0.0096  | 0.1923  | 0.5407  | 0.5538  | 0.4966  | 0.3894  | 0.5103  |
| PVX_081775 | 0.3949  | 0.2594  | 0.2466  | 0.1859  | 0.1699  | 0.2542  | 0.2362  | 0.0508  | -0.1013 |
| PVX_002655 | 0.464   | 0.2769  | 0.0884  | -0.1167 | -0.0585 | -0.5847 | -0.9098 | -0.5081 | -0.2385 |
| PVX_090255 | 0.826   | 0.7582  | 0.6424  | 0.3274  | -0.1637 | -1.1079 | -1.4224 | -0.793  | -0.2578 |
| PVX_095350 | 0.2864  | 0.4041  | 0.4887  | 0.4264  | 0.0918  | -0.1372 | -0.6497 | -1.3444 | -1.3204 |
| PVX_085535 | 0.8345  | 0.6091  | 0.5828  | 0.4036  | 0.2376  | -0.004  | -0.4383 | -0.5102 | -0.1944 |
| PVX_083055 | 0.1006  | 0.2817  | 0.3825  | 0.1988  | 0.2662  | 0.6005  | 0.4952  | -0.1638 | -0.0842 |
| PVX_097750 | 0.2289  | 0.4133  | 0.365   | 0.4272  | 0.4885  | 0.3976  | 0.3549  | 0.4543  | 0.2774  |
| PVX_100875 | 0.0291  | -0.2759 | -0.4264 | -0.3245 | -0.3172 | 0.1485  | 0.4771  | 0.3854  | 0.6626  |
| PVX_101055 | 0.3538  | 0.5397  | 0.3575  | 0.1102  | 0.4838  | 0.6366  | 0.3474  | -0.124  | -0.0879 |
| PVX_116740 | -0.3726 | -0.3015 | -0.0695 | -0.0578 | -0.2608 | 0.1188  | 0.7381  | 0.5389  | 0.3602  |
| PVX_123665 | 0.5356  | 0.4088  | 0.3858  | 0.2131  | 0.1576  | -0.1799 | -0.5042 | -0.2659 | 0.0241  |
| PVX_002715 | -0.8542 | -0.6618 | -0.631  | -0.6163 | -0.2908 | 0.6683  | 0.5276  | 0.0357  | -0.3422 |
| PVX_089580 | -0.5304 | 0.1948  | 0.5339  | 0.4485  | 0.5902  | -0.011  | -0.6846 | -0.8002 | -0.8249 |
| PVX_110865 | 0.4223  | -0.2061 | 0.3312  | 0.6088  | 0.4581  | 0.4242  | 0.312   | 0.6157  | 0.8597  |
| PVX_117135 | 1.1144  | 0.1849  | -0.0281 | -0.2475 | -0.8063 | -0.2613 | 0.4523  | 1.2463  | 1.4927  |
| PVX_001625 | 0.2218  | 0.1547  | 0.2015  | 0.1771  | 0.2797  | 0.2448  | 0.0489  | -0.1123 | -0.236  |
| PVX_113665 | -0.461  | -0.8709 | -1.2689 | -1.4561 | -0.3313 | 0.6822  | 1.1531  | 0.8131  | 0.5505  |
| PVX_100870 | 0.3442  | 0.027   | -0.213  | 0.1001  | -0.4175 | 0.0546  | -0.1569 | -0.1165 | -0.1625 |
| PVX_081805 | -1.1779 | -0.1185 | 0.046   | 0.1709  | 0.1661  | 0.1951  | -0.4976 | -0.7972 | -0.932  |
| PVX_082950 | 0.3202  | -0.21   | -0.4621 | -0.6995 | -0.1797 | 0.236   | 0.2617  | 0.4515  | 0.7312  |
| PVX_042190 | -0.2557 | -0.274  | -0.3606 | -0.3529 | -0.5036 | -0.7462 | -0.5431 | -0.402  | -0.5124 |
| PVX_113905 | 0.6378  | 0.2482  | 0.1947  | -0.0938 | 0.0713  | 0.1889  | 0.2968  | -0.3065 | -0.3495 |
| PVX_119615 | 0.8699  | 0.5912  | 0.5675  | 0.4092  | 0.3487  | 0.1405  | -0.4494 | -0.4669 | -0.3283 |
| PVX_123880 | -0.1165 | 0.2051  | 0.5168  | 0.475   | 0.518   | 0.3367  | 0.0792  | 0.0953  | -0.0499 |
| PVX_088010 | 0.6763  | 1.0681  | 1.1274  | 1.0131  | 0.4527  | -0.1274 | -0.2519 | 0.0573  | 0.114   |
| PVX_083465 | 0.3569  | 0.5369  | 0.6518  | 0.4771  | 0.5216  | 0.4349  | -0.2838 | -1.1308 | -1.1233 |
| PVX_113615 | -0.2281 | 0.0319  | -0.0153 | -0.0612 | -0.2215 | -0.1596 | 0.1355  | 0.7592  | 0.4648  |
| PVX_115245 | -0.0508 | 0.4504  | 0.1953  | 0.1701  | 0.0784  | 0.3292  | 0.5876  | 0.4427  | 0.4221  |
| PVX_085650 | 1.1156  | 0.4038  | 0.0369  | -0.3156 | -0.5963 | -0.4968 | -0.1537 | 0.7468  | 1.5441  |
| PVX_001900 | 0.1245  | -0.0497 | 0.1226  | 0.2244  | 0.1378  | 0.2838  | 0.3553  | 0.3482  | 0.3298  |
| PVX_092730 | 0.3727  | 0.4235  | 0.7541  | 0.483   | 0.46    | 0.3751  | -0.5445 | -1.1726 | -1.1237 |
| PVX_083165 | -0.8011 | -0.7818 | -0.4034 | -0.1098 | 0.2356  | 0.6174  | 0.4701  | 0.1021  | -0.0008 |
| PVX_091915 | -0.2845 | 0.0742  | 0.216   | 0.0811  | 0.2339  | 0.5822  | 0.2075  | -0.0607 | -0.2883 |
| PVX_115445 | -0.1726 | 0.2105  | 0.108   | 0.0607  | 0.0556  | 0.1455  | -0.1939 | -0.7695 | -0.8014 |
| PVX_117755 | 0.0596  | 0.2524  | 0.1326  | 0.0335  | -0.2262 | -0.3863 | -0.0801 | 0.2584  | 0.3944  |
| PVX_086090 | -0.2742 | -0.4818 | -0.9866 | -1.3943 | -1.2622 | -0.7455 | 1.2145  | 1.2014  | 0.6457  |
| PVX_098885 | -0.2963 | 0.6135  | 0.7229  | 0.758   | 0.2273  | -0.8703 | -0.7314 | -0.477  | -0.3543 |
| PVX_082385 | 0.1576  | -0.0534 | -0.0484 | -0.0471 | -0.1374 | -0.1612 | 0.3279  | 0.2976  | 0.0865  |
| PVX_084755 | -0.1649 | -0.5099 | -0.7655 | -1.2623 | -1.2481 | -1.2573 | 0.349   | 1.1662  | 0.9362  |
| PVX_117855 | -0.9365 | -0.4794 | 0.046   | 0.1292  | -0.0074 | 0.6567  | 0.2995  | -0.2173 | -0.4471 |
| PVX_101270 | 0.1657  | 0.2354  | -0.0816 | 0.0112  | -0.3074 | -0.0651 | 0.7817  | 1.2216  | 1.1219  |
| PVX_082555 | 0.0458  | 0.523   | 0.8187  | 0.651   | 0.6095  | 0.2886  | -0.1769 | -0.533  | -0.6117 |
| PVX_114305 | -0.0753 | -0.2534 | -0.1252 | -0.1863 | -0.8211 | -1.2979 | -1.014  | 0.8234  | 1.2012  |
| PVX_101235 | -0.4135 | -0.2532 | -0.5758 | -0.6288 | 0.0099  | 0.8848  | 0.2337  | -0.4067 | -0.5733 |
| PVX_001060 | 0.5025  | 0.6068  | 0.6921  | 0.5461  | 0.7445  | 0.3097  | -0.1831 | -0.2144 | -0.0847 |
| PVX_003950 | 0.3253  | 0.2413  | -0.106  | -0.2278 | -0.4923 | 0.259   | 0.478   | -0.2616 | -0.1856 |
| PVX_123515 | 0.4162  | 0.0934  | -0.1386 | -0.15   | -0.1078 | -0.5188 | 0.1275  | 0.4057  | 0.6152  |
| PVX_091895 | 0.6042  | 0.5653  | 0.5064  | 0.4087  | 0.4589  | 0.0138  | -0.5273 | -1.1808 | -1.0786 |
| PVX_113315 | 0.5908  | 0.1941  | 0.3058  | 0.0951  | 0.0439  | 0.4643  | 0.3331  | 0.1941  | 0.5207  |
| PVX_079845 | 0.0023  | 0.0083  | -0.0232 | 0       | 0.2481  | 0.633   | 0.5596  | -0.1419 | -0.3491 |
| PVX_122780 | 1.4055  | 0.6138  | 0.5687  | 0.4732  | 0.1597  | -0.0706 | -0.8844 | -1.0909 | -0.6892 |
| PVX_083140 | 0.2722  | 0.2081  | 0.0765  | 0.1507  | -0.1428 | 0.009   | 0.089   | -0.0876 | 0.1157  |
| PVX_002845 | 1.0807  | 0.7553  | 0.5918  | 0.3324  | 0.2989  | -0.0952 | -0.0431 | 0.3601  | 0.6676  |
| PVX_082580 | -0.5836 | 0.4558  | 0.6542  | 0.8656  | 0.7043  | -0.1596 | -0.3721 | -0.6248 | -0.6855 |

|            |         |         |         |         |         |         |         |         |         |
|------------|---------|---------|---------|---------|---------|---------|---------|---------|---------|
| PVX_123025 | -1.0562 | -0.0805 | 0.6853  | 0.9951  | 0.9795  | 0.1284  | -0.8165 | -0.8991 | -0.84   |
| PVX_092790 | 0.217   | -0.2769 | -0.339  | -0.2993 | 0.1232  | 0.3592  | 0.2633  | 0.2555  | 0.5246  |
| PVX_091505 | -0.3369 | 0.8298  | 1.113   | 0.985   | 0.8547  | 0.2581  | -0.5672 | -0.7579 | -0.5312 |
| PVX_087675 | 0.3301  | 0.2989  | 0.1455  | 0.2226  | -0.0972 | -1.6731 | -1.8347 | -1.3544 | -0.7349 |
| PVX_081365 | 0.7734  | 0.2879  | 0.3055  | 0.3328  | 0.162   | 0.1001  | 0.2052  | 0.108   | -0.1847 |
| PVX_097005 | -1.3802 | -1.132  | -1.3383 | -0.9718 | -1.0966 | -1.1293 | -1.1177 | 0.598   | 1.0241  |
| PVX_000025 | 0.5676  | 0.9195  | 0.9121  | 0.7392  | 0.5731  | 0.0028  | -0.4511 | -0.6246 | -0.4744 |
| PVX_115105 | 0.3161  | 0.3297  | 0.6566  | 1.5119  | 0.6921  | 0.1405  | 0.2894  | 0.1533  | -0.0369 |
| PVX_115055 | -0.2889 | -1.019  | -0.8081 | -0.2817 | 0.2337  | 0.1055  | -0.0552 | 0.2018  | 0.1792  |
| PVX_086305 | 0.3943  | 0.7737  | 0.9127  | 0.7742  | 0.5338  | 0.6817  | -0.5361 | -1.3577 | -1.1983 |
| PVX_092435 | -0.0252 | 0.3068  | 0.4434  | 0.352   | 0.2535  | 0.132   | -0.3947 | -0.5449 | -0.5841 |
| PVX_114320 | -0.0165 | -0.1691 | 0.0377  | 0.7517  | 0.8484  | 0.6001  | 0.205   | -0.0407 | -0.0394 |
| PVX_111325 | -0.2181 | 0.1597  | 0.1514  | 0.3359  | 0.2305  | 0.1917  | 0.1202  | -0.0617 | -0.5813 |
| PVX_114085 | 0.1205  | 0.1283  | 0.1582  | 0.0963  | 0.2817  | 0.6144  | 0.3746  | -0.3443 | -0.5716 |
| PVX_095165 | -0.7935 | -0.7978 | -0.6554 | -0.7162 | -0.634  | 0.6467  | 1.2169  | 0.8083  | -0.2995 |
| PVX_085630 | 0.3565  | 0.0495  | 0.057   | 0.2418  | 0.2242  | 0       | 0.0672  | 0.3855  | 0.8554  |
| PVX_095280 | -0.5523 | -0.4999 | -0.4044 | -0.0688 | 0.2856  | 0.4499  | -0.1004 | -0.4826 | -0.2499 |
| PVX_090300 | -2.1611 | -2.213  | -2.6005 | -2.8515 | -2.82   | -2.718  | -2.2281 | 1.3563  | 1.574   |
| PVX_113475 | -0.1822 | 0.2796  | 0.1818  | 0.2308  | 0.2271  | -0.212  | -0.454  | -0.8064 | -0.6397 |
| PVX_101310 | 0.44    | 0.261   | 0.085   | -0.4939 | -1.1431 | -1.0256 | -0.6805 | 0.4149  | 1.2257  |
| PVX_002835 | 0.1914  | 0.4147  | 0.559   | 0.5959  | 0.5536  | -0.1207 | -0.6752 | -0.944  | -0.9348 |
| PVX_091890 | 0.5056  | 0.7419  | 0.8682  | 0.6087  | -0.2026 | -0.1998 | -0.6217 | -0.3402 | -0.093  |
| PVX_079880 | 0.0632  | 0.1502  | 0.1643  | -0.0861 | -0.167  | 0.2731  | 0.3101  | 0.301   | 0.5476  |
| PVX_113880 | 0.6224  | 0.7412  | 0.5627  | 0.48    | 0.2293  | -0.0494 | 0.0064  | -0.4043 | -0.5701 |
| PVX_089225 | -0.4602 | -0.0255 | 0.1155  | 0.3531  | 0.4442  | 0.2398  | -0.6928 | -0.8374 | -0.9315 |
| PVX_112645 | -1.0219 | -0.9304 | -1.0152 | -0.9867 | -0.6635 | 0.6995  | 0.9195  | 0.1387  | -0.1024 |
| PVX_101460 | 0.5631  | 0.3298  | 0.4381  | 0.4075  | 0.024   | 0.1359  | 0.1599  | 0.0098  | 0.2654  |
| PVX_092465 | -0.4628 | -0.201  | 0.1429  | 0.4282  | 0.6029  | 0.3606  | 0.2378  | 0.1412  | -0.1533 |
| PVX_003810 | -2.7715 | -2.8257 | -3.04   | -3.0016 | -2.8715 | 1.4151  | 1.8287  | 0.322   | -0.9159 |
| PVX_117355 | -0.4738 | -0.1947 | 0.2066  | 0.4497  | 0.5462  | 0.6256  | 0.2548  | 0.2121  | -0.0405 |
| PVX_001685 | 0.8435  | 1.1048  | 1.3778  | 0.8166  | -0.72   | -1.9408 | -2.0332 | -0.647  | -0.034  |
| PVX_119775 | -0.5492 | -0.5326 | 0.3305  | 0.6167  | 0.2633  | -0.1583 | -0.5356 | -0.3144 | -0.1598 |
| PVX_119625 | -0.1837 | -0.5368 | -0.6802 | -0.6889 | -0.6916 | 0.5517  | 1.1812  | 0.6411  | 0.3636  |
| PVX_094810 | 0.2625  | 0.006   | -0.1535 | -0.467  | -0.3121 | -0.2173 | 0.0418  | 0.1581  | 0.3227  |
| PVX_111045 | 0.5393  | 0.2738  | 0.1056  | -0.1679 | 0.108   | 0.4156  | -0.3048 | -1.1507 | -0.6015 |
| PVX_092170 | -1.0795 | -0.6251 | -0.205  | 0.178   | 0.3264  | 0.138   | 0.4039  | 0.3399  | -0.298  |
| PVX_122165 | 0.0755  | 0.0868  | 0.0972  | -0.0101 | -0.1464 | 0.5711  | 0.486   | -0.1482 | 0.0443  |
| PVX_081500 | -0.77   | -1.0268 | -1.0581 | -0.8304 | -0.368  | 0.5387  | 0.6236  | 0.6871  | 0.3889  |
| PVX_094960 | 0.9504  | 0.0466  | -0.4175 | -0.7898 | -0.939  | -0.711  | 0.4782  | 0.9783  | 1.1822  |
| PVX_082500 | -0.4759 | 0.2783  | 0.1159  | -0.1975 | -0.2375 | 0.6131  | 0.4192  | -0.1873 | -0.4962 |
| PVX_081420 | -0.4527 | -0.8979 | -1.4398 | -1.3865 | -0.2606 | 0.6589  | 0.8478  | 0.5345  | 0.2791  |
| PVX_113320 | -0.1771 | -0.0629 | 0.0013  | -0.1008 | 0.1214  | 0.1273  | -0.3813 | -0.5587 | -0.6356 |
| PVX_101515 | 0.5028  | 0.4258  | 0.6072  | 0.5997  | 0.6655  | 0.352   | -0.8393 | -1.3418 | -1.136  |
| PVX_091275 | -0.7305 | 0.3568  | 0.7113  | 0.9901  | 0.6376  | -0.7998 | -1.1814 | -1.3431 | -1.3657 |
| PVX_119365 | 0.2349  | 0.3848  | 0.4698  | 0.391   | 0.004   | -0.7799 | -0.8047 | -0.0615 | 0.193   |
| PVX_087745 | -0.1631 | -0.4771 | -0.6353 | -1.1181 | -1.267  | -0.4927 | 0.8287  | 0.647   | 0.4529  |
| PVX_002520 | 0.2348  | -0.0476 | 0.1469  | 0.3707  | 0.0196  | 0.0032  | 0.5999  | 0.8218  | 0.5608  |
| PVX_119505 | -0.2849 | -0.6767 | -0.6765 | -0.0759 | -0.2319 | 0.0223  | 0.3917  | 0.5858  | 0.4439  |
| PVX_090930 | -0.8838 | -1.2421 | -1.2224 | -1.0804 | -0.3623 | 0.5559  | 1.1348  | 0.7332  | 0.6425  |
| PVX_115215 | -0.6748 | 0.0264  | 0.4939  | 0.7283  | 0.5315  | 0.0265  | -0.6102 | -0.3812 | -0.4253 |
| PVX_085505 | -0.2584 | -0.4139 | -0.7939 | -1.0048 | -0.6886 | 0.3101  | 0.9757  | 0.6023  | 0.5408  |
| PVX_096265 | 0.1291  | 0.3499  | 0.4406  | 0.3894  | 0.3849  | 0.1084  | -0.5442 | -0.8999 | -1.0221 |
| PVX_116630 | -0.8394 | 0.0525  | 0.5709  | 0.736   | 0.5554  | 0.5187  | -0.4999 | -1.3446 | -1.9463 |
| PVX_117815 | -0.6181 | -0.7547 | -0.774  | -0.3545 | 0.2398  | 0.9518  | 0.6315  | 0.204   | -0.1017 |
| PVX_117380 | 0.4021  | 0.3565  | -0.2706 | -0.6722 | -1.095  | -0.8995 | -0.1749 | 0.4893  | 0.9805  |
| PVX_086910 | 1.4821  | 0.3573  | 0.1674  | 0.3759  | 0.13    | -0.1197 | 0.1324  | 0.523   | 0.7494  |
| PVX_124060 | -1.9812 | -1.8995 | -2.2386 | -2.3481 | -2.2737 | -0.3149 | 1.845   | 1.3321  | -0.3679 |
| PVX_119435 | 0.1821  | 0.5402  | 0.6767  | 0.4743  | -0.0412 | -0.6312 | -0.5816 | -0.3921 | -0.0575 |
| PVX_116710 | 0.045   | 0.0676  | -0.0076 | -0.0467 | 0.0208  | -0.263  | -0.01   | -0.2528 | -0.2359 |
| PVX_083535 | -0.4901 | 0.0981  | 0.4211  | 0.6258  | 0.6777  | 0.7432  | -0.0626 | -0.1261 | -0.0446 |
| PVX_115065 | 0.4815  | 0.4068  | 0.49    | 0.1954  | -0.1428 | -0.0332 | 0.1045  | -0.2932 | 0.1117  |
| PVX_113855 | 0.5099  | 0.4729  | 0.4135  | 0.5695  | 0.2468  | 0.077   | -0.3732 | -0.3526 | -0.0936 |
| PVX_092365 | 0.529   | 0.0105  | -0.2385 | -0.3294 | -0.5357 | -0.7816 | 0.5187  | 0.4112  | 0.0403  |

|            |         |         |         |         |         |         |         |         |         |
|------------|---------|---------|---------|---------|---------|---------|---------|---------|---------|
| PVX_001825 | 0.9793  | 0.6659  | 0.1491  | -0.0048 | -0.0484 | -0.2125 | 0.3349  | 0.8774  | 1.1637  |
| PVX_118240 | -0.2079 | -0.6633 | -0.8241 | -0.3599 | 0.5075  | 1.0596  | 0.5914  | 0.3135  | 0.2904  |
| PVX_122200 | 0.08    | 0.4219  | 0.6035  | 0.6578  | 0.539   | -0.0642 | -0.4075 | -0.3953 | -0.3265 |
| PVX_089080 | -0.1813 | -0.3811 | -0.4729 | -0.2302 | 0.2223  | 0.458   | 0.1024  | -0.1574 | -0.1305 |
| PVX_089115 | 1.118   | 0.7661  | 0.5584  | 0.4     | -0.1862 | -0.5781 | -0.3034 | -0.3163 | -0.3854 |
| PVX_080145 | -1.0097 | -0.9202 | -1.0492 | -1.3206 | -1.4679 | -0.9595 | 0.819   | 1.202   | 0.8643  |
| PVX_085060 | 0.5279  | 0.343   | 0.1552  | 0.0694  | 0.1738  | 0.3829  | 0.0339  | -0.5076 | -0.7408 |
| PVX_119380 | 0.0332  | -0.1374 | 0.2115  | 0.1371  | 0.219   | 0.2821  | 0.4642  | 0.2155  | 0.2021  |
| PVX_091740 | 0.6132  | 0.3499  | 0.3792  | 0.2975  | -0.0028 | 0.3886  | 0.2639  | -0.1301 | 0.0228  |
| PVX_110820 | -0.0032 | -0.331  | -0.2023 | -0.1505 | -0.2104 | -0.2689 | 0.2672  | 0.1733  | -0.0145 |
| PVX_092540 | -0.7347 | -0.4405 | -0.0133 | 0.1226  | 0.4805  | 0.7169  | 0.213   | -0.5796 | -0.5486 |
| PVX_116520 | 0.5687  | 0.6422  | 0.4254  | 0.2498  | 0.216   | -0.1316 | -0.3775 | -0.5147 | -0.0607 |
| PVX_090890 | 0.9325  | 0.4667  | 0.2688  | 0.1583  | 0.002   | 0.5231  | 0.3557  | -0.0481 | 0.1997  |
| PVX_091325 | 0.8606  | 0.6199  | 0.3283  | 0.1462  | -0.1699 | -0.1536 | 0.1864  | 0.4891  | 0.3244  |
| PVX_118415 | 0.044   | -0.162  | -0.2345 | -0.1307 | 0.1271  | 0.8106  | 1.1215  | 0.5955  | 0.4     |
| PVX_084385 | 0.1024  | -0.5498 | -0.9136 | -1.4208 | -0.4012 | 0.4397  | 0.9209  | 0.9425  | 0.7421  |
| PVX_117170 | 0.1682  | 0.4182  | 0.5081  | 0.5272  | 0.504   | 0.2742  | -0.8062 | -1.5723 | -1.5627 |
| PVX_091290 | 0.4225  | -0.0251 | 0.2076  | 0.6637  | 0.5333  | 0.3611  | 0.5829  | 0.1762  | 0.7141  |
| PVX_119410 | -0.743  | -0.119  | 0.087   | 0.3239  | 0.4428  | 0.5002  | -0.6986 | -1.1755 | -1.1651 |
| PVX_097830 | -1.2865 | -0.8921 | 0.0065  | 0.4178  | 0.7787  | 0.7603  | 0.1604  | -0.503  | -1.0189 |
| PVX_099090 | -0.0046 | 0.1582  | 0.1487  | 0.282   | 0.416   | 0.5806  | 0.1955  | 0.0973  | -0.0928 |
| PVX_098075 | 0.7682  | 0.6046  | 0.3469  | 0.4324  | 0.4864  | 0.0648  | 0.71    | 0.9466  | 0.9994  |
| PVX_113465 | -0.3215 | -0.1473 | -0.2712 | -0.153  | -0.1795 | -0.5228 | -0.2996 | -0.0569 | -0.4186 |
| PVX_118550 | -1.1123 | -0.8603 | -0.5098 | -0.1814 | 0.0545  | 0.3556  | 0.3755  | -0.2966 | -0.6468 |
| PVX_082735 | 0.1649  | -0.266  | -0.5109 | -0.5272 | -0.2841 | 0.2532  | 0.1018  | 0.4346  | 0.5958  |
| PVX_113420 | 0.2688  | 0.1735  | 0.1174  | 0.2891  | 0.463   | -0.1114 | -0.2941 | -0.9449 | -0.5979 |
| PVX_002525 | 0.5285  | 0.0719  | -0.1985 | -0.3577 | -0.2335 | 0.2793  | 0.4505  | 0.4023  | 0.1309  |
| PVX_093550 | 0.6484  | 0.2594  | 0.6129  | 0.5839  | 0.841   | 0.6636  | 0.2746  | 0.827   | 0.4108  |
| PVX_124095 | -1.6228 | 0.0647  | 0.431   | 0.6569  | 0.777   | 0.2727  | -1.063  | -1.6712 | -1.8255 |
| PVX_099295 | 0.0352  | -0.738  | -0.5484 | -0.0107 | 0.4446  | 0.7819  | 0.5984  | 0.3667  | 0.1859  |
| PVX_001755 | -0.0884 | 0.198   | 0.4092  | 0.5743  | 0.5862  | 0.3243  | 0.0781  | -0.1965 | -0.3    |
| PVX_000525 | -0.7148 | -0.8548 | -1.0959 | -1.0893 | 0.0685  | 0.8191  | 0.68    | 0.2145  | 0.2757  |
| PVX_098660 | 0.2786  | 0.1059  | 0.0248  | 0.1294  | 0.1561  | 0.3643  | 0.6249  | 0.7353  | 0.587   |
| PVX_085960 | -0.8459 | -0.2394 | -0.0394 | 0.3562  | 0.3979  | 0.6279  | -0.0345 | -1.0871 | -1.1856 |
| PVX_114465 | -0.5214 | -0.7913 | -0.8473 | -0.5998 | 0.1698  | 0.9821  | 0.9962  | 0.4225  | 0.0136  |
| PVX_089960 | 0.2348  | 0.3984  | 0.6489  | 0.8005  | 0.7998  | 1.2268  | 0.7268  | 0.5227  | 0.2915  |
| PVX_123640 | -0.0994 | -0.3121 | -0.4858 | -0.6096 | -0.7232 | -0.8313 | -0.2912 | -0.2412 | -0.1372 |
| PVX_115175 | 1.0146  | 0.6444  | 0.3628  | 0.5178  | 0.3847  | 0.1059  | -0.1428 | -0.2    | -0.0074 |
| PVX_000685 | 0.5     | 0.1719  | 0.2734  | 0.0862  | 0.4845  | 0.2998  | 0.2131  | -0.0038 | 0.0886  |
| PVX_119590 | -0.0464 | 0.5979  | 0.7254  | 0.6964  | 0.5021  | 0.1836  | -0.1991 | -0.2409 | -0.2649 |
| PVX_121910 | 0.6235  | 0.5575  | 0.2711  | 0.0192  | -0.1637 | 0.1548  | 0.2552  | 0.226   | 0.0148  |
| PVX_080310 | 0.5343  | -0.0195 | -0.3047 | -0.3248 | -0.6304 | -0.4286 | -0.0942 | 0.7832  | 1.1863  |
| PVX_094275 | 0.6604  | 0.5269  | 0.3732  | -0.2242 | -0.9933 | -2.1453 | -2.0581 | 0.8543  | 1.4237  |
| PVX_082475 | 0.6436  | -0.0331 | -0.0304 | 0.3986  | 0.5697  | 0.5665  | 0.1569  | -0.0214 | 0.3133  |
| PVX_088215 | -0.0684 | 0.18    | 0.027   | -0.1285 | -0.3637 | -0.4667 | -0.573  | -0.439  | -0.1666 |
| PVX_089770 | 0.2852  | 0.0305  | 0.167   | 0.2838  | 0.4697  | 0.1151  | -0.3409 | 0.0824  | -0.1677 |
| PVX_081215 | -0.6115 | 0.3036  | 0.3985  | 0.2635  | 0.4616  | 0.046   | -0.4644 | -0.7034 | -0.2854 |
| PVX_088015 | 0.4585  | 0.7483  | 0.6834  | 0.3133  | -0.0625 | -0.5951 | 0.2894  | 0.1839  | 0.5794  |
| PVX_123890 | 0.0462  | 0.1803  | 0.1917  | 0.3594  | 0.2184  | -0.1517 | -0.2543 | -0.7441 | -0.8231 |
| PVX_084425 | 0.6725  | 0.1461  | -0.1868 | -0.6399 | -0.7456 | -0.6995 | -0.0218 | 0.4799  | 0.803   |
| PVX_117655 | -0.2875 | 0.2347  | 0.6352  | 0.9678  | 0.8848  | -0.0808 | -0.2858 | -0.4335 | -0.3574 |
| PVX_100695 | -0.5395 | -0.9606 | -0.8543 | -0.5811 | 0.0682  | 0.1717  | -0.1214 | -0.3588 | -0.6002 |
| PVX_082430 | 0.406   | 0.4987  | 0.3249  | -0.0451 | -0.042  | 0.1261  | 0.7071  | 1.3449  | 0.8388  |
| PVX_081840 | 0.4857  | 0.5892  | 0.3578  | 0.0586  | -0.7589 | -0.9756 | -1.0991 | 0.2995  | 0.535   |
| PVX_113995 | -0.2746 | -0.1449 | -0.1275 | -0.2552 | 0.0192  | 0.13    | 0.0904  | -0.3905 | -0.778  |
| PVX_098740 | -0.2855 | -0.1605 | 0.1269  | 0.2162  | 0.2941  | 0.0552  | -0.191  | -0.1674 | -0.1132 |
| PVX_114805 | 0.7422  | 0.4913  | 0.1338  | -0.3247 | -0.5917 | -0.1701 | 0.1267  | 0.9401  | 1.2321  |
| PVX_003645 | 0.9996  | 0.0024  | -0.1602 | -0.6463 | -0.9385 | -0.3477 | 0.6348  | 1.062   | 1.4289  |
| PVX_099615 | -0.2464 | 0.1386  | 0.3716  | 0.3769  | 0.153   | 0.1973  | 0.4801  | 0.3215  | -0.0677 |
| PVX_118200 | -0.1746 | 0.3699  | 0.6038  | 0.5552  | 0.5453  | -0.2489 | -1.0828 | -1.1793 | -0.8203 |
| PVX_094525 | 0.0573  | -0.0165 | 0.2526  | 0.6156  | 0.4305  | -0.1311 | -0.1322 | -0.2592 | 0.2045  |
| PVX_094985 | 0.1141  | 0.7523  | 0.6298  | 0.6869  | 0.4335  | -0.2144 | -0.398  | -0.2547 | 0.0228  |
| PVX_122565 | -0.4247 | 0.1012  | 0.3383  | 0.4606  | 0.4852  | 0.2511  | -0.294  | -0.5732 | -0.2981 |

|            |         |         |         |         |         |         |         |         |         |
|------------|---------|---------|---------|---------|---------|---------|---------|---------|---------|
| PVX_099030 | 0.3524  | 0.3293  | 0.4969  | 0.4796  | 0.461   | 0.0075  | -0.1527 | -0.3322 | -0.1509 |
| PVX_123870 | -0.8609 | -0.7939 | -0.5428 | -0.3084 | -0.1905 | -0.187  | 0.5664  | 1.0444  | 0.5386  |
| PVX_092760 | 0.1832  | -0.1008 | -0.4154 | -0.978  | -0.9648 | -0.2783 | 0.2727  | 0.9819  | 1.0097  |
| PVX_113555 | -0.5619 | -0.3323 | 0.2743  | 0.7393  | 0.6163  | 0.7418  | 0.0754  | -0.2391 | -0.4366 |
| PVX_089075 | 0.5093  | 0.5505  | 0.1088  | -0.7288 | -1.2854 | -1.3573 | -0.965  | 0.3493  | 1.5696  |
| PVX_097935 | -0.3641 | -0.6082 | -1.0709 | -1.4401 | -1.6665 | -1.7565 | 0.4507  | 1.4619  | 1.062   |
| PVX_094990 | -1.224  | -1.3078 | -0.4319 | 0.1871  | 0.3904  | 0.419   | 0.1344  | -0.3148 | -0.3186 |
| PVX_117510 | 0.7582  | 0.6597  | 0.6246  | 0.4897  | 0.5084  | 0.6384  | -0.2306 | -0.6566 | -0.4776 |
| PVX_117905 | 0.507   | 0.3685  | 0.2578  | 0.1507  | 0.2327  | 0.1704  | 0.096   | 0.0905  | 0.2308  |
| PVX_101060 | -0.0928 | 0.593   | 0.6862  | 0.6327  | 0.3859  | 0.0281  | -0.491  | -0.6979 | -0.6948 |
| PVX_117490 | 0.201   | 0.2101  | 0.309   | 0.4528  | 0.2946  | 0.6611  | 0.6135  | -0.1128 | -0.5148 |
| PVX_091350 | -0.6429 | -0.3176 | -0.6518 | -0.9807 | -0.5135 | -0.0754 | 0.375   | 0.8339  | 0.6105  |
| PVX_095095 | 0.3371  | 0.4615  | 0.3658  | 0.3611  | 0.2823  | 0.1619  | 0.0698  | -0.1614 | -0.2836 |
| PVX_090105 | -0.1043 | -0.2547 | 0.3633  | 0.7764  | 0.6481  | 0.6951  | 0.1725  | 0.2599  | -0.0818 |
| PVX_117390 | -0.3979 | -0.0906 | -0.0144 | 0       | -0.0453 | -0.2324 | -0.2418 | -0.3232 | -0.2129 |
| PVX_117435 | 0.0966  | 0.2379  | 0.2767  | 0.2743  | 0.3752  | 0.1471  | -0.2159 | -0.2162 | -0.176  |
| PVX_089090 | -0.6422 | -0.0085 | -0.1292 | -0.0121 | 0.3294  | 0.2995  | 0.2909  | 0.026   | -0.1608 |
| PVX_085550 | -0.2611 | 0.0013  | -0.0444 | 0.0395  | 0.2101  | 0.4443  | 0.089   | -0.1682 | -0.0999 |
| PVX_098700 | 0.1204  | -0.0599 | -0.097  | -0.0268 | 0.1421  | 0.7761  | 0.6717  | -0.1835 | -0.398  |
| PVX_084770 | 0.3999  | 0.3274  | 0.4278  | 0.2374  | 0.1143  | 0.1939  | 0.1744  | 0.4057  | 0.3537  |
| PVX_082970 | 0.2571  | 0.5104  | 0.5516  | 0.5427  | 0.196   | 0.2894  | -0.2671 | -0.9485 | -0.8428 |
| PVX_107740 | 1.6101  | 1.3291  | 0.8722  | 0.0948  | -0.6611 | -1.4245 | -1.4601 | -1.58   | -1.1145 |
| PVX_123375 | 1.0333  | 1.1682  | 1.255   | 0.9382  | 0.6063  | -0.1113 | -0.7733 | -0.7929 | -0.5208 |
| PVX_118075 | -0.0196 | -0.1556 | -0.3335 | -0.1723 | -0.2624 | -0.226  | 0.3304  | 0.432   | 0.1021  |
| PVX_005045 | 1.3295  | 1.1523  | 0.9596  | 0.7312  | 0.4913  | -0.4795 | -0.5421 | -0.4183 | 0.0074  |
| PVX_091965 | 0.8914  | 0.7237  | 0.5547  | 0.2459  | -0.4065 | -1.1285 | -0.9319 | 0.5152  | 0.6509  |
| PVX_118205 | 0.5361  | 0.3053  | 0.1879  | 0.0927  | 0.3432  | -0.053  | 0.3001  | 0.3727  | 0.1965  |
| PVX_091420 | -0.2282 | -0.3234 | -0.173  | 0.3855  | 0.4794  | 0.2378  | 0.5129  | 0.2388  | 0.1364  |
| PVX_114960 | -0.4059 | -0.3327 | -0.5119 | -0.5785 | -0.5414 | 0.3909  | 1.3451  | 0.8334  | 0.3018  |
| PVX_024690 | -0.9998 | -0.7134 | -0.6566 | -0.776  | -0.8525 | -0.7492 | -0.6483 | 0.1051  | -0.2684 |
| PVX_113280 | 0.2556  | -0.1378 | -0.5387 | -0.5332 | -0.0292 | 0.145   | -0.2377 | 0.2027  | 0.058   |
| PVX_099745 | -1.3587 | -1.374  | -1.5246 | -1.2436 | 0.1743  | 1.1687  | 0.7459  | -0.2677 | -0.7125 |
| PVX_035190 | 0.0946  | 0.852   | 1.0335  | 1.2807  | 1.0343  | 0.7331  | 0.0777  | -0.3202 | -0.7192 |
| PVX_084560 | 0.6894  | 0.5677  | 0.6885  | 0.8287  | 0.8484  | 0.2267  | -0.2923 | -0.1017 | -0.0612 |
| PVX_095455 | -0.69   | -0.1122 | 0.5955  | 0.9157  | 1.0717  | 0.4831  | -0.0929 | -0.5404 | -0.7448 |
| PVX_123585 | 0.5673  | 0.4948  | 0.4316  | 0.3456  | 0.397   | 0.032   | -0.2696 | -0.3281 | -0.112  |
| PVX_118100 | 0.2608  | -0.3013 | -0.5023 | -0.4212 | -0.5733 | -0.8891 | -0.5457 | -0.3832 | -0.7507 |
| PVX_088035 | -0.245  | -0.6969 | -0.7062 | -0.3799 | 0.1165  | 0.4906  | 0.3217  | -0.1795 | -0.3404 |
| PVX_081605 | -0.4095 | -0.1836 | -0.1637 | -0.1083 | 0.0572  | 0.3415  | -0.1375 | -0.0964 | -0.2432 |
| PVX_089985 | 0.1993  | 0.0802  | 0.3544  | 0.2416  | 0.1688  | -0.2216 | -0.2843 | 0.0453  | 0.2287  |
| PVX_114325 | -0.4446 | -0.196  | -0.3692 | 0.2748  | 0.5128  | 0.4205  | 0.3154  | 0.2303  | 0.0162  |
| PVX_085540 | -0.1258 | 0.3571  | 0.257   | 0.4771  | 0.466   | 0.2523  | 0.1226  | -0.0524 | -0.0595 |
| PVX_098860 | -1.0605 | -1.0977 | -1.1557 | -1.347  | -1.1389 | -0.8642 | 1.3897  | 1.0297  | -0.3964 |
| PVX_091705 | -0.4084 | -0.0215 | 0.1835  | 0.5506  | 0.3527  | -0.5173 | -1.1328 | -1.2248 | -0.7587 |
| PVX_094920 | -2.0614 | -2.1643 | -2.3257 | -2.4012 | -2.3953 | 0.6812  | 1.2332  | -0.503  | -1.3762 |
| PVX_117110 | 0.2745  | 0.2261  | -0.0021 | -0.1261 | -0.3308 | -0.64   | -0.6026 | -0.399  | -0.278  |
| PVX_115015 | -0.262  | -0.0555 | -0.1163 | 0.0361  | 0.0927  | 0.4774  | 0.7383  | 0.4654  | -0.0808 |
| PVX_091005 | -0.6223 | -0.0445 | 0.4285  | 0.579   | 0.705   | -0.2579 | -0.6331 | -0.5021 | -0.4806 |
| PVX_098040 | 0.5099  | 0.3873  | 0.3505  | 0.0208  | -0.1428 | -0.3083 | -0.1143 | 0.2763  | 0.8099  |
| PVX_116720 | 1.404   | 0.4519  | 0.5944  | 0.2337  | 0.543   | 0.261   | 0.323   | 0.3584  | 0.617   |
| PVX_122610 | -0.061  | 0.4358  | 0.6192  | 0.9716  | 0.7331  | 0.5182  | 0.3078  | -0.0676 | -0.5031 |
| PVX_089980 | 0.366   | 0.4651  | 0.3578  | 0.2032  | 0.2788  | 0.3739  | 0.0265  | 0.116   | 0.3845  |
| PVX_114920 | -0.4108 | 0.2202  | 0.3363  | 0.4768  | 0.5721  | 0.2409  | -0.0919 | -0.2255 | -0.3172 |
| PVX_117090 | 0.4251  | 0.4253  | 0.3602  | 0.0853  | -0.01   | -0.0726 | 0.0504  | 0.2099  | 0.427   |
| PVX_090290 | -0.2116 | -0.1235 | -0.1902 | 0.0359  | -0.482  | -0.6813 | -0.8722 | -0.7536 | -0.7003 |
| PVX_091120 | 0.6384  | 0.5486  | 0.6592  | 0.8466  | 0.6978  | 0.4103  | -0.6261 | -1.1705 | -0.9548 |
| PVX_081400 | 0.1053  | 0.1067  | -0.077  | -0.1012 | -0.3122 | -0.5893 | -0.6645 | -0.3679 | -0.5216 |
| PVX_117625 | 0.7373  | 0.053   | -0.6416 | -1.4131 | -1.9391 | -1.3276 | 0.4364  | 0.2135  | -0.3505 |
| PVX_116570 | 0.1605  | -0.2142 | -0.9044 | -0.9329 | -0.4856 | 0.3944  | 1.1758  | 0.7569  | 0.7293  |
| PVX_121975 | 0.6625  | 0.3901  | 0.53    | 0.5502  | 0.1681  | -0.2466 | -0.9573 | -0.7983 | -0.543  |
| PVX_084205 | -0.3831 | 0.1078  | 0.1922  | 0.2217  | 0.1599  | 0.2856  | -0.0957 | -0.5068 | -0.7522 |
| PVX_003910 | 0.5569  | 0.3348  | 0.2799  | 0.3568  | 0.5219  | 0.5173  | 0.2617  | 0.1378  | 0.0483  |
| PVX_083000 | 0.128   | 0.292   | 0.3989  | 0.2287  | 0.2769  | 0.1167  | -0.5352 | -1.1195 | -1.0309 |

|            |         |         |         |         |         |         |         |         |         |
|------------|---------|---------|---------|---------|---------|---------|---------|---------|---------|
| PVX_118690 | -0.0641 | -0.0449 | -0.3787 | -1.3668 | -2.2681 | -2.1493 | -1.1977 | 1.1777  | 1.1836  |
| PVX_084290 | -1.0031 | -0.5209 | -0.9033 | -1.1389 | -1.1929 | -0.014  | 1.0396  | 1.1686  | 0.893   |
| PVX_118695 | 1.4086  | 0.8872  | 0.5794  | 0.3411  | 0.0293  | -0.2475 | -1.1735 | -1.4492 | -0.8383 |
| PVX_113355 | -0.5496 | -0.8504 | -0.8708 | -0.6226 | 0.0747  | 1.0038  | 1.2206  | 0.3928  | -0.1653 |
| PVX_081580 | 0.2392  | -0.2253 | -0.33   | 0.0888  | 0.2641  | 0.0315  | 0.3613  | 0.5328  | 0.35    |
| PVX_092425 | -0.1307 | -0.1886 | -0.6284 | -0.8099 | -0.9361 | -0.6666 | 0.6968  | 1.1344  | 0.6593  |
| PVX_084785 | -0.0606 | 0.073   | 0.3897  | 0.6169  | 0.5803  | 0.0538  | -0.5114 | -0.4278 | -0.5167 |
| PVX_085990 | -0.3187 | -0.5719 | 0.0469  | 0.5281  | 0.5233  | 0.1602  | -0.31   | -0.1648 | 0.195   |
| PVX_099585 | -0.0448 | -0.6405 | -1.2502 | -1.5463 | -1.7805 | -0.2249 | 1.2124  | 0.6331  | 0.7655  |
| PVX_121970 | 0.3605  | 0.4851  | 0.2828  | 0.1333  | 0.1061  | 0.0805  | 0.1297  | -0.2283 | -0.1162 |
| PVX_117790 | -0.0356 | 0.4015  | 0.5683  | 0.8911  | 0.5144  | -0.2832 | -0.9191 | -0.7495 | -0.485  |
| PVX_085635 | 0.2099  | 0.1795  | 0.0836  | 0.1897  | 0.2152  | 0.0979  | 0.0061  | 0.3757  | 0.6029  |
| PVX_097755 | -0.3243 | -0.4727 | -0.0979 | 0.2091  | 0.1663  | -0.122  | 0.1059  | 1.3712  | 1.121   |
| PVX_094680 | 0.2143  | 0.4238  | 0.2547  | 0.306   | 0.2485  | -0.1526 | -0.2189 | 0.0846  | 0.5966  |
| PVX_080645 | 0       | 0.6758  | 0.955   | 0.6748  | 0.462   | 0.0597  | -0.4267 | -0.396  | -0.2535 |
| PVX_122390 | 0.7579  | 0.7288  | 0.5758  | 0.806   | 0.4417  | 0.4378  | -0.1991 | -0.4921 | -0.4744 |
| PVX_099740 | 0.4174  | -0.0633 | 0.0573  | 0.0692  | 0.2224  | 0.2502  | -0.0464 | 0.333   | 0.5849  |
| PVX_100920 | 0.4513  | 0.0864  | -0.0376 | -0.3943 | -0.6417 | -0.5714 | -0.0854 | 0.7028  | 0.797   |
| PVX_111155 | -0.148  | 0.1333  | 0.1136  | -0.0678 | 0.0506  | 0.177   | -0.1692 | -0.6449 | -0.6372 |
| PVX_087800 | -0.2386 | -0.5234 | -0.8135 | -0.9386 | -1.0559 | -0.6154 | 1.0629  | 0.961   | 0.6673  |
| PVX_081650 | 0.3395  | 0.7738  | 0.6528  | 0.5679  | 0.3069  | 0.172   | -0.4958 | -0.6783 | -0.7657 |
| PVX_112705 | 0.903   | 0.6836  | 0.3353  | 0.0989  | -0.3527 | -0.295  | -0.0491 | 0.3531  | -0.082  |
| PVX_094335 | -0.0748 | -0.4495 | -0.3851 | -0.3086 | -0.336  | 0.1072  | 0.1779  | -0.0417 | 0.1923  |
| PVX_117620 | 0.2774  | 0.341   | 0.343   | -0.0146 | -0.2828 | -0.1349 | -0.3417 | 0.2409  | 1.0036  |
| PVX_099005 | 0.3144  | 0.1477  | -0.1457 | -0.3366 | -0.2372 | 0.0964  | -0.0252 | -0.2273 | -0.1185 |
| PVX_091100 | -0.0625 | -0.4246 | -0.105  | 0.0834  | 0.5347  | 0.4807  | 0.1362  | -0.0859 | 0.1414  |
| PVX_097610 | -0.195  | 0.2078  | 0.374   | 0.3521  | 0.247   | -0.3988 | -1.0046 | -0.6349 | -0.1046 |
| PVX_086990 | -0.2036 | 0.0168  | 0.148   | -0.0585 | -0.0465 | 0.0201  | -0.0871 | -0.2063 | -0.2483 |
| PVX_092545 | 0.3322  | 0.3557  | 0.4758  | 0.4573  | 0.5859  | 0.6989  | 0.0729  | -0.272  | -0.3986 |
| PVX_100010 | -1.0991 | -0.5098 | -0.3375 | -0.4771 | -0.4627 | -0.5286 | -0.3888 | -0.4127 | -0.3576 |
| PVX_089735 | -0.6555 | 0.5196  | 0.8291  | 0.7728  | 0.5858  | -1.1274 | -1.5358 | -1.5013 | -1.1431 |
| PVX_123830 | -0.6369 | -0.0622 | 0.1366  | -0.0559 | 0.1085  | -0.1672 | -0.3798 | -0.6548 | -0.6691 |
| PVX_092150 | 0.1829  | 0.3888  | 0.5806  | 0.5931  | 0.4981  | 0.0348  | -0.3138 | -0.5319 | -0.6336 |
| PVX_115090 | -1.3085 | -1.1735 | -1.1902 | -0.0137 | 0.86    | 0.7617  | 0.2556  | -0.2184 | -0.3661 |
| PVX_100655 | 0.4948  | 0.2144  | 0.6243  | 0.6499  | 0.6064  | 0.4616  | 0.3226  | 0.1788  | 0.3503  |
| PVX_118460 | 0.6979  | -0.2534 | -0.6699 | -1.4281 | -1.4446 | -1.2308 | -0.1581 | 0.6345  | 1.4622  |
| PVX_089170 | -0.6263 | -0.4848 | -0.4226 | -0.2102 | -0.138  | 0.6685  | 0.2183  | -0.9012 | -1.3223 |
| PVX_082525 | 0.341   | 0.6707  | 0.7243  | 0.4581  | 0.4744  | 0.2501  | -0.5278 | -1.0084 | -0.9587 |
| PVX_090055 | 0.2135  | 0.2377  | 0.2592  | 0.1894  | 0.4864  | 0.4114  | 0.3606  | 0.287   | 0.238   |
| PVX_084900 | -0.2606 | -0.4962 | -0.939  | -0.9746 | -1.2703 | -0.6297 | 0.6908  | 0.6743  | 0.4336  |
| PVX_015135 | -1.5353 | -0.8287 | -1.2342 | -1.0676 | -0.5128 | -0.7727 | -0.9306 | -0.8587 | -0.8883 |
| PVX_000945 | -0.0069 | -0.2524 | -0.4488 | -0.5681 | -0.923  | -0.9681 | 0.9127  | 0.9321  | 0.304   |
| PVX_114070 | 0.15    | -0.2455 | -0.1675 | -0.0096 | 0.3661  | 0.8057  | 0.5506  | 0.1518  | 0.1811  |
| PVX_090935 | -0.8477 | -1.4851 | -1.7557 | -1.6839 | -0.4815 | 0.3229  | 1.2426  | 0.7335  | 0.1537  |
| PVX_087960 | 0.4927  | 0.4812  | 0.1669  | -0.4723 | -0.1656 | -0.112  | -0.0773 | 0.5477  | 1.1979  |
| PVX_096200 | 0.8727  | 0.3788  | 0.2208  | -0.0624 | -0.3018 | 0.168   | 0.27    | 0.6825  | 1.0689  |
| PVX_086850 | 0.8669  | 0.1282  | -0.3921 | -0.7625 | -1.1146 | -0.9451 | -1.0323 | -0.5889 | -0.2689 |
| PVX_119535 | -0.9674 | -0.9798 | -1.0163 | -0.8292 | -0.5474 | -0.2346 | 0.1698  | 1.4446  | 0.9859  |
| PVX_117215 | 0.8182  | 0.9447  | 0.7707  | 0.7388  | 0.4359  | -0.3551 | -0.8387 | -0.8299 | -0.6252 |
| PVX_093620 | 0.1651  | 0.3394  | 0.6408  | 0.7275  | 0.6011  | 0.3879  | 0.6555  | 0.6307  | 0.0306  |
| PVX_092260 | 1.0598  | 0.5184  | 0.6588  | 0.3652  | 0.3738  | 0.2702  | -0.3353 | -0.3108 | -0.0795 |
| PVX_095465 | 0.3503  | -0.2775 | -0.2774 | 0.1442  | 0.2434  | -0.0766 | 0.4206  | 0.5448  | 0.7884  |
| PVX_091430 | -0.0106 | -0.0896 | -0.4092 | -0.3486 | -0.0929 | -0.3721 | 0.5331  | 0.6757  | 0.4663  |
| PVX_085245 | 0.0722  | 0.0923  | 0.2084  | 0.2311  | 0.3846  | 0.3465  | 0.3903  | 0.0559  | 0.2086  |
| PVX_099785 | -0.5039 | -0.3665 | 0.2026  | 0.3112  | 0.3186  | 0.6138  | 0.5953  | 0.0703  | -0.0037 |
| PVX_087851 | -0.511  | -0.9055 | -0.6838 | -0.1565 | 0.1323  | 0.1452  | 0.0143  | 0.3289  | 0.0846  |
| PVX_123365 | 0.9453  | 0.39    | -0.091  | -0.539  | -0.0812 | 0.1947  | 0.5051  | 0.8694  | 1.0647  |
| PVX_101075 | -0.7666 | -1.1537 | -1.6442 | -1.2998 | -0.2274 | 0.6406  | 0.8751  | 0.4386  | 0.1322  |
| PVX_122735 | 0.0885  | 0.0157  | -0.1287 | -0.5066 | -0.5497 | 0.4549  | 0.3061  | 0.1745  | 0.697   |
| PVX_085240 | -0.1618 | -0.0031 | -0.0796 | -0.1494 | -0.0901 | 0.432   | 0.3665  | 0.1383  | -0.0422 |
| PVX_092360 | 0.2867  | 0.0847  | 0.0918  | 0.0409  | 0.1321  | 0.0534  | 0.1452  | 0.5073  | 0.662   |
| PVX_093560 | -0.4815 | -1.1153 | -1.2407 | -0.1392 | 0.7964  | 0.6215  | 0.1129  | -0.4479 | -0.3584 |
| PVX_084715 | -0.183  | 0.2097  | 0.5033  | 0.8212  | 0.4815  | 0.3935  | 0.2921  | 0.134   | 0.0875  |

|            |         |         |         |         |         |         |         |         |         |
|------------|---------|---------|---------|---------|---------|---------|---------|---------|---------|
| PVX_068690 | 0.4887  | 0.1103  | -0.0915 | -0.0908 | -0.05   | -0.2223 | -0.1532 | -0.1444 | 0.2078  |
| PVX_119560 | 0.3627  | 0.3858  | 0.5043  | 0.3708  | 0.3364  | 0.2511  | -0.1936 | -0.3141 | -0.0159 |
| PVX_079700 | 0.315   | -0.4417 | -0.6698 | -0.4833 | 0.088   | 0.3468  | 0.399   | 0.6334  | 0.6355  |
| PVX_111125 | 0.3487  | -0.2735 | -0.3749 | -1.1035 | -1.0487 | -1.1884 | -0.5043 | 0.4811  | 1.2977  |
| PVX_092945 | 0.298   | 0.1236  | -0.0809 | -0.3538 | -0.4122 | -0.4292 | -0.0929 | 0.7064  | 1.2805  |
| PVX_002960 | 0.1132  | -0.0904 | -0.1025 | -0.2322 | 0.4167  | 0.7653  | 0.5578  | 0.4305  | 0.4901  |
| PVX_097565 | 0.0012  | 0.3791  | 0.3454  | 0.4783  | -0.0091 | -0.1163 | -0.4983 | -0.5256 | -0.2313 |
| PVX_114355 | -0.6824 | -0.5888 | -0.8787 | -0.8606 | -1.0552 | -1.0649 | 0.3227  | 1.2197  | 0.8376  |
| PVX_119645 | -0.1931 | 0.0998  | 0.1176  | 0.0743  | 0.064   | -0.1735 | -0.1481 | -0.0688 | -0.297  |
| PVX_099155 | -0.2607 | 0.0653  | 0.0698  | 0.0161  | -0.0657 | 0.1379  | 0.0125  | 0.1595  | 0.0518  |
| PVX_003780 | -0.3905 | -0.042  | -0.0895 | -0.2722 | -0.6285 | -1.0677 | -0.0183 | 0.8035  | 0.5716  |
| PVX_118265 | 0.9663  | 0.0703  | -0.3142 | -0.8353 | -0.9424 | -0.5237 | 0.3618  | 1.0019  | 1.1573  |
| PVX_101300 | -0.1383 | -0.3693 | -0.4452 | -0.4361 | -0.2903 | -0.1563 | -0.3865 | 0.1024  | 0.0904  |
| PVX_124125 | 0.1448  | -0.5039 | -0.6528 | -0.1457 | 0.3776  | 0.4207  | 0.8151  | 1.0256  | 1.0216  |
| PVX_101175 | 0.4642  | -0.1806 | -0.4322 | -0.5107 | -0.3219 | -0.4132 | 0.1793  | 0.6468  | 1.0716  |
| PVX_114725 | 0.6483  | 0.2075  | 0.369   | -0.0155 | 0.4543  | 0.2774  | 0.3797  | 0.3588  | 0.3033  |
| PVX_118195 | 1.0039  | 0.4738  | 0.1781  | 0.1105  | 0.246   | 0.4234  | 0.1676  | 0.1689  | 0.4303  |
| PVX_089615 | 0.3554  | 0.2204  | 0.0823  | -0.0444 | -0.1909 | -0.0341 | 1.0341  | 0.7285  | 0.0932  |
| PVX_084230 | -0.1516 | 0.3094  | 0.5289  | 0.4341  | 0.5469  | 0.8059  | 0.0055  | -0.8663 | -0.6089 |
| PVX_122005 | 0.1798  | 0.4077  | 0.4595  | 0.142   | 0.2413  | 0.1762  | -0.0552 | 0.0949  | 0.2315  |
| PVX_116635 | 0.727   | 0.761   | 0.7252  | 0.6653  | 0.6868  | 0.2018  | -0.0626 | -0.1038 | -0.2185 |
| PVX_081455 | 0.2804  | 0.3431  | 0.5278  | 0.659   | 0.8374  | 1.2484  | 0.2928  | -0.3432 | -0.4567 |
| PVX_003880 | -0.1298 | 0.1844  | 0.5218  | 0.4879  | 0.4365  | 0.0674  | -0.3189 | -0.4633 | -0.6496 |
| PVX_093535 | 0.2544  | 0.3481  | 0.44    | 0.4786  | 0.4801  | 0.5116  | 0.4247  | 0.182   | -0.082  |
| PVX_097675 | -1.363  | -1.632  | -1.6902 | -1.9671 | -1.9914 | -0.4911 | 0.8183  | 1.1725  | 0.5057  |
| PVX_080250 | -0.2932 | 0.1117  | 0.2343  | 0.413   | 0.2771  | 0.2814  | -0.1628 | -0.4952 | -0.5499 |
| PVX_122340 | -1.3443 | -1.5549 | -1.7914 | -1.8377 | -1.7    | -1.6666 | 1.2606  | 1.3332  | 0.301   |
| PVX_122445 | -1.1553 | -0.4006 | 0.3996  | 0.4059  | 0.281   | 0.2245  | 0.1459  | -0.4116 | -0.5752 |
| PVX_080525 | -0.703  | 0.3957  | 0.6186  | 0.9573  | 0.7229  | 0.0358  | -0.6854 | -0.395  | -0.4111 |
| PVX_114045 | 0.2426  | -0.2383 | -0.2339 | -0.4848 | -0.342  | 0.3585  | -0.0249 | -0.2246 | -0.3557 |
| PVX_082825 | -0.3068 | 0.2541  | 0.4102  | 0.5406  | 0.4716  | 0.3192  | -0.4714 | -0.4802 | -0.6364 |
| PVX_085695 | -0.0989 | -0.0798 | -0.4137 | -0.4148 | -0.1833 | -0.3793 | -0.2452 | 0.4141  | 0.2264  |
| PVX_003740 | -0.3524 | -0.3019 | -0.2385 | 0.1924  | 0.2619  | 0.0073  | -0.03   | 0.1475  | -0.1174 |
| PVX_118685 | 0.1955  | 0.9339  | 0.4035  | -0.2628 | -1.3294 | -1.323  | -0.9545 | 0.4022  | 1.1009  |
| PVX_087980 | 0.851   | 0.1791  | -0.1834 | -0.4151 | -0.5891 | -1.4019 | -1.2013 | 0.1557  | 0.3004  |
| PVX_089050 | -0.6477 | -0.4525 | -0.6438 | -0.2036 | 0.809   | 0.8699  | 0.2905  | -0.229  | -0.1865 |
| PVX_096185 | 0.5367  | 0.4367  | 0.0931  | -0.4949 | -0.7339 | -0.6147 | 0.262   | 0.7144  | 1.4122  |
| PVX_123480 | -0.3301 | 0.2166  | 0.4557  | 0.5374  | 0.4587  | 0.1559  | -0.3179 | -0.3168 | -0.3572 |
| PVX_089885 | 0.0085  | -0.1648 | -0.2023 | -0.2887 | -0.1909 | -0.5657 | -0.3746 | 0.8551  | 0.8039  |
| PVX_081645 | 0.3727  | 0.4673  | 0.3799  | 0.4375  | 0.2053  | 0.04    | -0.5895 | -0.0169 | 0.0721  |
| PVX_117120 | -0.2448 | -0.211  | 0.0216  | -0.0243 | -0.1397 | 0.1252  | 0.2051  | -0.139  | -0.0564 |
| PVX_084260 | 0.2493  | -0.1329 | -0.4788 | -0.8156 | -0.8216 | -0.8349 | -0.4417 | -0.1143 | 0.9239  |
| PVX_095260 | -0.3507 | 0.3142  | 0.1828  | 0.0472  | -0.0083 | -0.5658 | -0.9045 | -0.9698 | -0.9772 |
| PVX_118145 | 0.3426  | 0.4777  | 0.5312  | 0.5377  | 0.5186  | 0.0124  | -1.3036 | -1.8559 | -1.6751 |
| PVX_091415 | 0.9646  | 0.4528  | 0.1699  | -0.0619 | -0.4103 | 1.0307  | 0.1966  | -0.132  | -0.5121 |
| PVX_098980 | -0.0534 | -0.7046 | -0.6584 | 0.1241  | 0.878   | 0.172   | 0.0064  | -0.0405 | 0.1976  |
| PVX_114165 | -0.3433 | 0.0096  | 0.2348  | 0.3464  | -0.0759 | -0.2195 | -0.2783 | -0.3276 | -0.4611 |
| PVX_089855 | 1.6254  | 0.8944  | 0.4134  | 0.0052  | 0.1977  | -0.2801 | -0.4909 | -0.2119 | 0.2333  |
| PVX_101290 | -0.473  | -0.4011 | 0.0189  | 0.6143  | 1.1774  | 0.764   | 0.2913  | 0.1515  | 0.1126  |
| PVX_081200 | -0.0571 | -0.3366 | -0.4195 | -0.3615 | -0.5538 | -0.8192 | -0.809  | -0.8592 | -0.6121 |
| PVX_118390 | -0.356  | -0.2097 | 0.1869  | 0.4989  | 0.7842  | 0.3712  | 0.1205  | 0.0059  | 0.0424  |
| PVX_092915 | -0.2232 | -0.4973 | -0.14   | -0.0407 | -0.0789 | -0.2963 | -0.175  | 0.0747  | 0.0071  |
| PVX_114790 | 0.5104  | 0.5041  | 0.2943  | 0.1293  | 0.1169  | -0.0407 | 0.1514  | -0.0953 | -0.032  |
| PVX_088890 | -0.5571 | 0.3422  | 0.5791  | 0.5573  | -0.1957 | -0.9643 | -0.9331 | -0.7533 | -0.5248 |
| PVX_118545 | -1.4235 | 0.2668  | 0.6552  | 0.9855  | 1.0755  | -0.0996 | -1.271  | -1.6127 | -1.6092 |
| PVX_090855 | 0.0517  | -0.1392 | -0.1648 | -0.0862 | -0.4303 | -0.0173 | -0.0118 | 0.367   | 0.4269  |
| PVX_112115 | 0.415   | 0.2897  | 0.4711  | 0.584   | 0.2407  | 0.1221  | -0.2548 | 0.9861  | 1.1649  |
| PVX_123283 | 0.816   | 0.7992  | 0.3784  | -0.0212 | -0.2261 | -0.3434 | 0.217   | 1.0852  | 1.1123  |
| PVX_084100 | 0.3012  | 0.7453  | 0.6542  | 0.7411  | 0.3589  | -0.2463 | -0.908  | -0.889  | -0.5763 |
| PVX_005060 | 0.9167  | 1.6586  | 1.4606  | 1.141   | 0.2559  | -0.8058 | -0.997  | -0.5995 | -0.5242 |
| PVX_113810 | 0.2266  | 0.7422  | 0.5958  | 0.6838  | 0.9077  | 0.6302  | 0.2833  | 0.2939  | 0.0617  |
| PVX_091990 | -0.6344 | -0.7887 | -1.2849 | -1.1006 | -0.0098 | 0.795   | 0.7049  | 0.6488  | 0.3647  |
| PVX_083170 | -0.0054 | -0.8223 | -0.9582 | -0.7899 | -0.3234 | 0.435   | 0.0979  | -0.1285 | 0.5343  |

|            |         |         |         |         |         |         |         |         |         |
|------------|---------|---------|---------|---------|---------|---------|---------|---------|---------|
| PVX_117400 | 0.0332  | -0.1581 | -0.4228 | -0.7293 | -0.3546 | -0.0411 | 0.4429  | 0.7212  | 0.5305  |
| PVX_117635 | -0.4197 | -0.4396 | -0.0291 | 0.8598  | 0.7236  | 0.6512  | 0.2905  | -0.2948 | -0.3433 |
| PVX_122175 | 0.4115  | 0.4056  | 0.3974  | 0.2761  | 0.3642  | 0.1119  | 0.2473  | 0.1526  | -0.1152 |
| PVX_080665 | 0.4407  | 0.2958  | -0.029  | 0.0684  | 0.1541  | -0.1408 | -0.0233 | 0.0398  | 0.4824  |
| PVX_086020 | 0.237   | 0.2066  | 0.387   | 0.361   | 0.2272  | -0.222  | -1.1144 | -1.6643 | -1.6202 |
| PVX_117360 | 0.1724  | 0.618   | 0.6962  | 0.8138  | 0.7216  | 0.4439  | 0.0088  | -0.3099 | -0.7057 |
| PVX_114575 | 0.2825  | 0.1552  | -0.0834 | -0.0098 | 0.0163  | 0.584   | -0.4116 | -0.5002 | -0.0998 |
| PVX_087720 | -0.5358 | -0.8233 | -1.1272 | -1.4666 | -1.5613 | -0.1781 | 0.938   | 0.7391  | 0.5302  |
| PVX_122940 | 0.2593  | -0.0564 | -0.0223 | 0.0406  | -0.2004 | 0.0769  | 0.511   | -0.0131 | -0.1305 |
| PVX_123610 | 0.3223  | 0.3312  | 0.2771  | 0.421   | 0.2858  | 0.5041  | -0.2819 | -0.664  | -0.8762 |
| PVX_003770 | -1.0117 | -0.3108 | -0.0953 | -0.116  | -0.0019 | 0.0766  | -0.3423 | 0.1087  | -0.2803 |
| PVX_123295 | -0.3557 | -0.6209 | -0.2763 | 0.1942  | 0.4027  | 0.5179  | 0.7314  | 0.2289  | -0.0999 |
| PVX_114280 | -0.8318 | -0.7552 | -0.5635 | -0.1196 | 0.4507  | 0.7082  | 0.3317  | -0.0417 | -0.2712 |
| PVX_114615 | 0.2233  | -0.7078 | -1.037  | -0.4457 | 0.4034  | 0.7092  | 0.3806  | 0.424   | 0.6851  |
| PVX_082670 | 0.6415  | 0.1487  | -0.2489 | -0.7443 | -0.8941 | -0.5569 | -0.1562 | 0.2799  | 0.8068  |
| PVX_080670 | -0.5668 | -0.7349 | -0.8505 | -0.8621 | -0.1021 | 0.7691  | 0.6302  | 0.0693  | 0.1156  |
| PVX_114745 | 0.5076  | 0.5287  | 0.1963  | 0.4456  | 0.0271  | 0.2444  | 0.1541  | -0.3308 | -0.1663 |
| PVX_123210 | 0.4795  | 0.367   | 0.3328  | 0.3509  | 0.468   | 0.6911  | -0.2479 | -0.7936 | -0.9877 |
| PVX_101000 | 0.9438  | 0.6633  | 0.4108  | 0.0613  | -0.2495 | -0.2607 | -0.4138 | -0.0249 | 0.7565  |
| PVX_082760 | -0.5436 | -0.3892 | -0.0484 | 0.1504  | 0.3229  | 0.5287  | 0.3193  | 0.0619  | 0.4063  |
| PVX_097745 | -1.4469 | -1.8073 | -2.0619 | -1.5901 | -0.8194 | 0.6835  | 0.9566  | 0.2283  | -0.3704 |
| PVX_080450 | 0.3748  | 0.5576  | 0.461   | 0.44    | 0.418   | 0.1426  | -0.2568 | -0.2235 | -0.3497 |
| PVX_079965 | 0.3148  | 0.2343  | 0.5601  | 0.8355  | 0.3183  | 0.1433  | 0.1791  | 0.3898  | 0.4189  |
| PVX_099965 | -0.3569 | 0.2843  | 0.3762  | 0.4233  | 0.2879  | -0.2159 | -0.5742 | -0.5578 | -0.3367 |
| PVX_089725 | -0.7194 | -0.2749 | -0.2367 | -0.3051 | -0.2175 | 0.2863  | -0.0651 | -0.4292 | -0.2783 |
| PVX_081410 | 0.0719  | 0.2742  | 0.287   | 0.4388  | 0.2846  | -0.0999 | -0.2259 | -0.2465 | -0.1769 |
| PVX_091830 | -0.2093 | 0.1168  | 0.0019  | -0.0714 | -0.3454 | 0.2265  | 0.6245  | 0.1528  | -0.1152 |
| PVX_090900 | -0.1745 | 0.0206  | 0.0864  | 0.1646  | 0.3277  | 0.6096  | -0.0488 | -0.9531 | -1.1696 |
| PVX_096115 | 0.2538  | -0.5154 | -0.4978 | -0.2775 | 0.182   | 0.6578  | 0.8044  | 0.7117  | 0.7198  |
| PVX_122385 | 1.0255  | 0.0055  | -0.6366 | -1.3158 | -1.7323 | -1.5408 | 0.1878  | 1.0842  | 1.6288  |
| PVX_099845 | -0.608  | -0.59   | -0.4791 | -0.1483 | 0.0604  | 0.0459  | 0.088   | -0.154  | -0.3201 |
| PVX_082995 | -0.0639 | 0.2176  | 0.1404  | 0.0253  | 0.0398  | 0.1928  | 0.2848  | -0.1558 | -0.157  |
| PVX_091450 | 0.0305  | 0.523   | 0.6987  | 0.761   | 1.0003  | 0.4482  | 0.0626  | -0.2833 | -0.3101 |
| PVX_091865 | 0.5597  | 0.5955  | 0.5721  | 0.3251  | 0.3685  | 0.2833  | -0.4713 | -0.8636 | -0.6137 |
| PVX_113265 | 0.1595  | 0.0362  | 0.0449  | -0.1287 | 0.3037  | 0.1161  | -0.062  | 0.2311  | 0.4157  |
| PVX_099275 | 0.2283  | 0.4113  | 0.4834  | 0.5389  | 0.6452  | 0.1835  | 0.0916  | 0.189   | 0.099   |
| PVX_080050 | 0.4635  | 0.4601  | 0.4469  | 0.5609  | 0.5721  | 0.0448  | -1.0244 | -1.379  | -1.1564 |
| PVX_099760 | 0.115   | -0.114  | -0.4501 | -0.488  | 0.1441  | 0.4193  | 0.1415  | 0.4422  | 0.6855  |
| PVX_094805 | -0.9309 | -0.3873 | -0.2053 | -0.176  | 0.1222  | 0.5     | 0.4731  | -0.2122 | -0.4965 |
| PVX_091260 | -0.1525 | -0.2077 | -0.1698 | -0.1403 | 0.1319  | 0.3588  | 0.1973  | 0.1165  | 0.5511  |
| PVX_083585 | -0.0797 | -0.0834 | -0.2535 | -0.5478 | -0.3951 | -0.3645 | -0.2766 | 0.0971  | 0.299   |
| PVX_123905 | 0.4078  | 0.3084  | 0.2108  | 0.1203  | 0.2339  | 0.2876  | 0.3308  | 0.1773  | -0.194  |
| PVX_099915 | 0.25    | 0.3981  | 0.2813  | 0.2246  | -0.0233 | 0.2075  | 0.2523  | -0.2675 | -0.6434 |
| PVX_117640 | -0.0861 | -0.4771 | -0.8734 | -0.6025 | 0.2357  | 0.7292  | 0.3045  | 0.1516  | 0.413   |
| PVX_117140 | 0.7193  | 0.5517  | 0.1991  | -0.4489 | -0.5734 | -0.8149 | -0.1931 | 0.75    | 1.5503  |
| PVX_099400 | 0.8858  | 0.8221  | 0.5898  | 0.3134  | 0.0142  | -0.19   | -0.2055 | -0.4025 | -0.3589 |
| PVX_099355 | -0.3855 | -0.0993 | -0.0898 | 0.2213  | 0.7489  | 0.6413  | 0.3503  | -0.2828 | -0.1737 |
| PVX_117410 | -0.9035 | -0.4804 | 0.3029  | 0.5071  | 0.2041  | 0.8956  | 0.4304  | -0.4144 | -0.6337 |
| PVX_089300 | -0.2381 | -0.1722 | 0.0185  | 0.0804  | 0.0263  | -0.2505 | 0.2192  | 0.1636  | -0.1659 |
| PVX_002955 | -0.7426 | -0.6514 | -0.8661 | -1.0002 | -0.2988 | 0.15    | 0.4659  | 0.1452  | -0.0511 |
| PVX_001700 | -0.8429 | -0.713  | -0.4428 | -0.3062 | 0.1193  | -0.1773 | -0.0851 | 1.0585  | 0.8757  |
| PVX_094925 | 0.8874  | -0.0987 | -0.325  | -0.463  | -0.3915 | -0.2371 | 0.5509  | 1.1763  | 1.4767  |
| PVX_117860 | 0.3792  | 0.2426  | 0.0801  | 0.0235  | 0.0701  | 0.1998  | 0.0511  | -0.4358 | -0.2197 |
| PVX_120845 | 0.8577  | 0.8901  | 0.7466  | 0.6487  | 0.0435  | -0.4513 | -0.8113 | -0.7382 | -0.4072 |
| PVX_089035 | -0.5287 | -0.3779 | -0.333  | -0.2664 | -0.0318 | 0.0325  | 0.2656  | 0.3188  | 0.0516  |
| PVX_119785 | -0.4513 | -0.5569 | 0.1189  | 0.4728  | 0.6507  | 0.3341  | -0.0258 | -0.2576 | -0.1929 |
| PVX_114055 | 0.0021  | 0.5966  | 0.5554  | 0.4768  | -0.0075 | -0.6358 | -0.8648 | -0.9326 | -1.0231 |
| PVX_092685 | -0.1948 | 0.1294  | 0.4848  | 0.7445  | 0.9381  | 0.5731  | 0.2006  | 0.0528  | 0.0734  |
| PVX_101570 | 0.5729  | 0.2004  | 0.0139  | -0.4103 | 0.1697  | -0.1273 | -0.0415 | 1.2382  | 1.1138  |
| PVX_085195 | 0.3747  | 0.2788  | 0.4084  | 0.4076  | 0.4293  | 0.3424  | 0.0857  | -0.3917 | -0.5159 |
| PVX_083410 | 0.1752  | 0.2658  | 0.3868  | 0.1422  | 0.0955  | 0.2916  | -0.3271 | -0.8378 | -0.4064 |
| PVX_092400 | 0.4838  | 0.3423  | 0.4382  | 0.2499  | 0.1325  | 0.0397  | -0.2244 | -0.5944 | -0.5775 |
| PVX_118155 | -0.2247 | -0.4196 | -0.2497 | 0.1806  | 0.5219  | -0.0157 | -0.287  | -0.1588 | -0.1099 |



|            |         |         |         |         |         |         |         |         |         |
|------------|---------|---------|---------|---------|---------|---------|---------|---------|---------|
| PVX_122930 | -1.0247 | -1.1581 | -1.2532 | -0.997  | -0.8388 | 0.1169  | 1.0554  | 0.5205  | -0.4546 |
| PVX_117085 | 0.7418  | -0.0013 | -0.1434 | -0.0113 | -0.1074 | 0.0135  | 0.1163  | 0.5448  | 1.1194  |
| PVX_089385 | -0.1862 | -0.3262 | -0.6371 | -0.9844 | -1.1748 | -1.0451 | 0.6908  | 0.8956  | 0.9407  |
| PVX_113720 | 0.6224  | 0.3614  | 0.1819  | 0.14    | -0.1023 | 0.0601  | 0.3961  | 0.7882  | 1.1484  |
| PVX_079820 | 0.6394  | 0.5623  | 0.3983  | 0.3263  | 0.1288  | 0.2478  | 0.2108  | 0.3652  | 0.432   |
| PVX_092005 | 0.142   | 0.0617  | -0.0014 | -0.2389 | -0.2519 | -0.2052 | 0.5416  | 0.6598  | 0.3064  |
| PVX_082845 | -0.4619 | 0.0333  | 0.2238  | 0.2783  | -0.0147 | 0.5377  | 0.1633  | -0.5076 | -0.805  |
| PVX_094590 | 0.1901  | 0.3672  | 0.1931  | 0.0831  | -0.0024 | 0.1093  | -0.7471 | -1.1329 | -0.9694 |
| PVX_118055 | 0.6314  | 0.5059  | 0.4137  | 0.316   | 0.0628  | -0.0447 | -0.8221 | -1.1547 | -0.9724 |
| PVX_113330 | -0.3465 | 0.6563  | 0.9051  | 0.8678  | 0.6285  | 0.0586  | -0.6062 | -0.9257 | -0.9786 |
| PVX_114870 | 0.4782  | 1.2092  | 0.9365  | 0.7741  | 0.034   | -0.8068 | -1.2791 | -1.5355 | -1.2724 |
| PVX_088915 | 0.6972  | -0.0072 | -0.3464 | -0.7686 | -0.7901 | -0.8562 | -0.1672 | 0.5744  | 0.7815  |
| PVX_085935 | -0.159  | -0.194  | -0.1178 | -0.1081 | 0.0689  | 0.2227  | 0.0144  | -0.2802 | -0.4456 |
| PVX_080535 | -0.4371 | -0.4377 | -0.2432 | -0.1309 | 0.1668  | 0.5659  | 0.476   | 0.3899  | 0.0058  |
| PVX_123380 | 0.4363  | 0.2101  | -0.0221 | -0.2312 | -0.3318 | -0.0667 | -0.2547 | -0.7058 | -0.4634 |
| PVX_122240 | 0.9293  | 0.4503  | 0.5287  | 0.7053  | 0.8107  | -0.6059 | -1.2188 | -1.2092 | -1.164  |
| PVX_099075 | 0.0665  | 0.3823  | 0.4014  | 0.4195  | 0.5372  | 0.2447  | -0.265  | -0.2402 | -0.298  |
| PVX_123035 | 0.9514  | 0.3512  | 0.0353  | -0.5478 | -0.9429 | -0.8406 | -0.3907 | 0.2939  | 1.1403  |
| PVX_083330 | 0.6963  | -0.1433 | -0.5001 | -0.4207 | -0.4589 | -0.5351 | 0.202   | 0.9145  | 1.0956  |
| PVX_003860 | 0.2277  | 0.2336  | 0.1725  | 0.0764  | 0.1892  | 0.1953  | -0.6208 | -0.4807 | -0.6406 |
| PVX_099525 | -0.2395 | 0.2261  | 0.4333  | 0.88    | 0.9597  | -0.1211 | -0.2558 | -0.3688 | -0.493  |
| PVX_079875 | 1.0223  | 0.6875  | 0.382   | 0.4281  | 0.4763  | 0.0225  | 0.2367  | 0.5176  | 0.7253  |
| PVX_114650 | -0.7588 | -0.9237 | -1.1582 | -1.3557 | -1.6189 | -0.6648 | 1.3455  | 1.0603  | 0.167   |
| PVX_098680 | -1.9395 | -0.8518 | -0.576  | -0.1588 | 0.0406  | 1.6269  | 0.5408  | -0.6623 | -1.3255 |
| PVX_001850 | -0.3725 | -0.4381 | -0.0508 | 0.077   | 0.0374  | 0.6397  | 0.814   | 0.3405  | 0.1714  |
| PVX_118235 | 0.3558  | 0.5291  | 0.4654  | 0.6397  | 0.3067  | 0.6139  | 0.1543  | -0.6207 | -0.7597 |
| PVX_092625 | -0.1401 | -0.0629 | -0.02   | -0.0689 | -0.0809 | 0.068   | 0.489   | 0.2659  | -0.1621 |
| PVX_094605 | -1.0045 | -1.1096 | -0.6106 | 0.421   | 0.6796  | 0.8275  | 0.2335  | -0.4903 | -0.7957 |
| PVX_096235 | -0.121  | 0.2653  | 0.4368  | 0.3563  | 0.4443  | -0.0491 | -0.4594 | -0.6569 | -0.3954 |
| PVX_119520 | -0.2907 | -0.6364 | 0.1606  | 0.6667  | 0.9015  | 0.3002  | -0.1161 | -0.034  | -0.1426 |
| PVX_101350 | 0.5953  | -0.0168 | -0.4425 | -0.6665 | -0.6307 | -0.4708 | 0.2576  | 0.6464  | 0.871   |
| PVX_113535 | -0.2723 | 0.246   | 0.2635  | 0.2891  | 0.1042  | 0.4518  | 0.0297  | -0.3769 | -0.539  |
| PVX_002875 | 0.1273  | 0.409   | 0.3575  | 0.1995  | 0.0462  | -0.0959 | -0.4229 | -0.7582 | -0.4101 |
| PVX_119270 | -0.1735 | -0.3819 | -0.2493 | 0.2946  | 0.7426  | 0.6829  | -0.4117 | -0.936  | -0.763  |
| PVX_086970 | 0.1814  | -0.0616 | -0.199  | -0.1856 | -0.219  | -0.3135 | 0.4724  | 0.5937  | 0.3512  |
| PVX_097600 | -0.7459 | -0.1381 | 0.1871  | 0.4945  | 0.5789  | 0.4203  | -0.1782 | -0.8688 | -0.8978 |
| PVX_096305 | -0.0481 | 0.1646  | 0.3845  | 0.6127  | 0.8231  | 0.3411  | 0.0128  | 0.1101  | 0.1564  |
| PVX_002905 | 0.4884  | 0.3678  | 0.4051  | 0.3544  | 0.2992  | 0.5048  | 0.2312  | -0.1521 | -0.4886 |
| PVX_099080 | -1.2971 | -0.5691 | -0.2274 | 0.2328  | 0.549   | 0.3671  | -0.5779 | -0.6952 | -0.294  |
| PVX_096245 | -0.9081 | -0.7362 | -0.7358 | -0.9472 | -1.0591 | -1.062  | 0.905   | 1.0236  | 0.1532  |
| PVX_115230 | -0.2477 | 0.0534  | -0.0811 | -0.032  | 0.0285  | 0.0249  | 0.0883  | -0.2286 | -0.3589 |
| PVX_002935 | -0.3558 | 0.3379  | 0.7099  | 0.69    | 0.8322  | 0.5356  | -0.0144 | -0.3363 | -0.2157 |
| PVX_093605 | 0.4375  | 0.1823  | -0.1116 | -0.0111 | 0.5544  | 0.4652  | 0.5618  | 0.9532  | 0.802   |
| PVX_100900 | 0.6694  | 0.5994  | 0.2783  | 0.264   | 0.3858  | 0.4726  | 0.2736  | 0.4611  | 0.5954  |
| PVX_081345 | -0.4266 | 0.0709  | 0.2926  | 0.4071  | 0.5063  | 0.7416  | 0.1693  | -0.4447 | -0.8456 |
| PVX_092280 | 0.6176  | 0.6722  | 0.7623  | 0.9009  | 0.3999  | -0.0184 | -0.5743 | -0.5121 | -0.4181 |
| PVX_114225 | 0.3292  | 0.2357  | 0.3117  | 0.2596  | -0.0853 | -0.0604 | 0.2456  | 0.1719  | 0.0937  |
| PVX_092905 | 0.486   | 0.1197  | -0.1691 | -0.6663 | -1.023  | -0.9655 | -0.6391 | 0.4594  | 1.2889  |
| PVX_116505 | -0.6344 | -0.1289 | -0.1065 | -0.2379 | -0.0508 | 0.2454  | 0.83    | 0.5122  | 0.3994  |
| PVX_089175 | -0.7923 | -0.2431 | -0.1142 | 0.1755  | 0.158   | -0.0103 | -0.5048 | -1.3301 | -1.2054 |
| PVX_116790 | 1.0901  | 0.6784  | 0.5024  | 0.3705  | -0.0359 | -0.021  | -0.2237 | -0.0409 | 0.0583  |
| PVX_122475 | -0.281  | -0.7549 | -1.0464 | -0.763  | 0.1828  | 0.6989  | 0.1094  | 0.1037  | 0.4038  |
| PVX_000785 | 0.4725  | 0.4732  | 0.32    | 0.4545  | 0.2641  | 0.1042  | -0.1003 | -0.0944 | -0.322  |
| PVX_085745 | -0.235  | -0.2354 | -0.3196 | -0.316  | -0.2587 | -0.4447 | -0.4063 | -0.2769 | -0.3544 |
| PVX_123570 | 0.4263  | 0.0041  | -0.3895 | -0.5276 | -0.6794 | -0.5619 | 0.2304  | 0.5769  | 0.2776  |
| PVX_002670 | 0.0223  | 0.0508  | -0.0713 | -0.1227 | -0.0171 | -0.0164 | -0.2352 | -0.1231 | 0.1512  |
| PVX_122360 | -0.7138 | 0.0735  | 0.1872  | 0.3     | 0.3215  | 0.3369  | -0.4894 | -0.5659 | -0.4617 |
| PVX_079950 | 0.6241  | 0.3492  | 0.2057  | -0.1245 | -0.4156 | -0.6649 | 0.4164  | 0.8503  | 1.4503  |
| PVX_095430 | -0.6221 | -0.2276 | 0.1356  | 0.5621  | 0.3969  | -0.1114 | -0.4372 | -0.1895 | 0.0135  |
| PVX_115335 | -0.6999 | -0.5523 | -0.8216 | -1.1814 | -1.2591 | -0.0432 | 0.4868  | 0.4125  | 0.4997  |
| PVX_086295 | 0.2726  | 0.2846  | 0.4323  | 0.3399  | 0.2074  | 0.2223  | -0.1643 | -0.3983 | -0.4034 |
| PVX_097870 | 0.2665  | -0.0916 | 0.4194  | 0.6296  | 0.3914  | 0.2647  | 0.0989  | -0.0175 | -0.0647 |
| PVX_099375 | -0.2331 | -0.8401 | -1.1236 | -1.2815 | -0.9692 | -0.6786 | 0.291   | 1.004   | 0.4775  |

|            |         |         |         |         |         |         |         |         |         |
|------------|---------|---------|---------|---------|---------|---------|---------|---------|---------|
| PVX_083265 | 0.5656  | 0.275   | 0.1916  | 0.1727  | -0.0117 | 0.3463  | -0.046  | -0.1132 | 0.1098  |
| PVX_083225 | -0.0334 | 0.091   | 0.1729  | 0.1605  | 0.2233  | 0.5572  | -0.0316 | -0.5336 | -0.5654 |
| PVX_097760 | 0.0933  | 0.3673  | 0.3269  | 0.1068  | 0.039   | -0.0361 | -0.6084 | -1.3039 | -1.0279 |
| PVX_114060 | -0.1663 | 0.2864  | 0.6774  | 0.7546  | 0.6484  | 0.0126  | -0.2309 | -0.3413 | -0.3237 |
| PVX_090215 | -0.0638 | -0.4609 | -0.7675 | -1.5723 | -1.5482 | -0.7985 | 1.3193  | 1.3921  | 1.0871  |
| PVX_113620 | -0.2232 | -0.0197 | 0.0939  | -0.0723 | -0.1062 | -0.1287 | 0.1099  | -0.071  | -0.1889 |
| PVX_090180 | 0.3003  | -0.2227 | -0.4903 | -0.5991 | 0.1645  | 0.5103  | 0.5149  | 0.588   | 0.6561  |
| PVX_118560 | -0.424  | -1.1406 | -0.6669 | -0.1532 | 0.1471  | 0.3874  | 0.2586  | -0.1124 | 0.245   |
| PVX_080065 | 0.1373  | -0.1348 | 0.2646  | 0.4841  | 0.2544  | -0.2044 | -0.2887 | -0.5548 | -0.0716 |
| PVX_081785 | -0.6423 | -0.1414 | 0.0403  | 0.2493  | 0.7498  | 0.2637  | 0.3866  | 0.1027  | 0.0096  |
| PVX_083420 | -1.5826 | -1.7649 | -1.8945 | -1.4404 | -1.4389 | -0.8155 | 1.3813  | 1.0386  | -0.1173 |
| PVX_114710 | 0.0915  | 1.0077  | 0.7819  | 0.6276  | 0.0517  | -0.7936 | -0.6894 | -0.6973 | -0.7048 |
| PVX_118020 | -0.5522 | -0.7927 | -0.7831 | -0.5734 | 0.1531  | 0.799   | 0.5049  | 0.2272  | -0.0842 |
| PVX_000750 | 0.6275  | 0.083   | -0.2603 | -0.4579 | -0.3489 | -0.2052 | 0.4464  | 0.6239  | 1.0496  |
| PVX_111315 | -0.9741 | -0.8117 | 0.0369  | 0.4326  | 0.5653  | 0.0665  | -0.4803 | -0.4235 | -0.1717 |
| PVX_115460 | 0.0693  | -0.0877 | -0.272  | -0.1814 | -0.2721 | -0.1228 | -0.5007 | -1.2318 | -1.1775 |
| PVX_001080 | 0.4203  | 0.0655  | 0.1364  | 0.175   | 0.1218  | -0.1295 | -0.762  | -0.8841 | -0.5566 |
| PVX_087055 | -0.4535 | -0.0136 | 0.1631  | 0.0095  | -0.2467 | 0.2997  | 0.4536  | 0.2773  | -0.1515 |
| PVX_003840 | -0.0514 | -0.0814 | -0.058  | 0.0596  | -0.0243 | -0.0421 | 0.0814  | -0.3508 | -0.5986 |
| PVX_014625 | 1.0744  | 0.6937  | 0.6659  | 0.2163  | 0.1544  | 0.3745  | -0.1145 | 0.0437  | 0.1639  |
| PVX_101005 | 0.4394  | 0.6083  | 0.6354  | 0.5685  | 0.5039  | -0.2171 | -0.7806 | -0.9515 | -0.8473 |
| PVX_094430 | -0.4983 | -0.455  | -0.3685 | -0.2569 | 0.1668  | 0.4998  | 0.1858  | -0.1295 | -0.3684 |
| PVX_113380 | -0.3187 | 0.0423  | 0.0552  | 0.0649  | -0.1186 | 0.0336  | -0.3465 | -0.3655 | -0.5366 |
| PVX_100755 | 0.059   | -0.0172 | -0.1272 | -0.0135 | 0.035   | -0.1405 | 0.0481  | -0.0915 | 0.0698  |
| PVX_101385 | 0.1277  | 0.0244  | 0.0047  | -0.0545 | -0.0752 | -0.0603 | 0.1785  | -0.1688 | -0.4911 |
| PVX_087080 | -0.8019 | -0.981  | -0.8643 | -0.6178 | -0.2328 | 0.5326  | 0.2982  | 0.083   | -0.6347 |
| PVX_081385 | 0.2078  | -0.1029 | -0.0448 | -0.0782 | 0.0009  | 0.0778  | 0.4803  | 0.9393  | 1.0457  |
| PVX_089820 | -1.469  | -1.6721 | -1.8336 | -1.851  | -2.0639 | -1.3973 | -1.0089 | 1.2161  | 1.7648  |
| PVX_084605 | -0.2066 | -0.0414 | 0.5782  | 0.4943  | 0.717   | 0.7409  | 0.3478  | -0.2556 | -0.0995 |
| PVX_001945 | 0.3267  | 0.1523  | 0.2581  | 0.4589  | 0.9433  | 1.0562  | 0.0098  | -0.2561 | 0.0628  |
| PVX_118315 | -0.544  | 0.5583  | 0.8187  | 0.8987  | 0.4793  | -0.6023 | -0.8302 | -0.9692 | -0.8968 |
| PVX_122665 | -0.3787 | -0.1719 | -0.3052 | -0.3241 | -0.3898 | -0.2476 | -0.4809 | 0.1972  | 0.3734  |
| PVX_095480 | 0.2101  | 0.2304  | 0.0655  | 0.0335  | 0.1827  | -0.0771 | -0.433  | -0.662  | -0.4306 |
| PVX_003730 | -1.2498 | -0.341  | -0.1066 | 0.2681  | 0.4077  | 0.9819  | 0.1752  | -0.968  | -1.3694 |
| PVX_097780 | 0.5049  | 0.0406  | -0.0894 | -0.0867 | -0.3099 | -0.6208 | 0.2047  | 0.7964  | 0.9349  |
| PVX_115390 | 0.6564  | 0.4932  | 0.6534  | 0.4827  | -0.0276 | -0.6168 | -0.693  | -0.3025 | 0.0407  |
| PVX_117930 | -0.5816 | -0.793  | -0.6166 | -0.1302 | 0.2989  | 0.6555  | 0.576   | -0.1469 | -0.1375 |
| PVX_100805 | 0.3319  | 0.5377  | 0.5784  | 0.6239  | 0.6135  | -0.5574 | -0.9014 | -0.7667 | -0.676  |
| PVX_099790 | -0.7026 | -0.8279 | -0.3442 | 0.1065  | 0.1568  | 0.6515  | 0.3388  | -0.3491 | -0.4286 |
| PVX_114370 | -0.5718 | 0.0103  | 0.0806  | 0.2505  | 0.3604  | 0.4497  | -0.1547 | -0.3466 | -0.346  |
| PVX_099175 | -0.3197 | -0.3755 | -0.3413 | -0.3186 | -0.0165 | -0.0571 | 0.5391  | 0.5068  | -0.0452 |
| PVX_089510 | -0.7404 | -0.7307 | -0.7333 | -0.7363 | -0.5492 | -0.0026 | -0.068  | 0.9792  | 0.6644  |
| PVX_123310 | -0.3363 | -0.1326 | -0.1293 | 0.0818  | -0.5707 | -0.0345 | 0.3856  | -0.1085 | -0.2241 |
| PVX_002630 | -0.3345 | -0.2192 | 0.0639  | 0.2079  | 0.2193  | 0.3359  | 0.2738  | -0.0315 | -0.2981 |
| PVX_085520 | -0.3637 | 0.3117  | 0.4082  | 0.2943  | -0.0702 | -0.0246 | -0.5179 | -0.3552 | -0.3491 |
| PVX_001630 | 0.2084  | 0.1054  | 0.1248  | 0.0104  | 0.1462  | 0.2437  | 0.1198  | -0.3381 | -0.4524 |
| PVX_082775 | -0.9411 | -0.2678 | -0.0845 | 0.2915  | 0.4354  | 0.848   | 0.519   | -0.1862 | -0.4214 |
| PVX_084840 | 0.9077  | 0.1367  | -0.3548 | -0.6638 | -0.629  | -0.3717 | -0.0654 | -0.0248 | 0.1486  |
| PVX_082780 | -0.7253 | 0.4184  | 0.6672  | 0.8735  | 0.5542  | 0.0401  | -0.229  | -0.5069 | -0.6197 |
| PVX_089215 | 0.2085  | 0.19    | 0.0399  | -0.0732 | 0.1267  | 0.3271  | 0.4156  | 0.4572  | 0.4407  |
| PVX_099855 | -0.445  | 0.3883  | 0.5718  | 0.7405  | 0.7935  | 0.3425  | -0.6325 | -0.7947 | -0.6709 |
| PVX_001865 | 0.6092  | 0.5438  | 0.729   | 0.7399  | 0.3526  | 0.3467  | -0.0838 | -0.327  | -0.1875 |
| PVX_116780 | 0.0916  | -0.0761 | -0.3991 | -0.4188 | -0.308  | -0.3902 | 0.0883  | -0.4531 | -0.2494 |
| PVX_091885 | -0.1075 | 0.7216  | 1.067   | 0.6631  | 0.4444  | 0.0204  | -0.1958 | -0.1323 | -0.1358 |
| PVX_111110 | -0.3849 | -0.354  | -0.4334 | -0.3326 | -0.3153 | 0.2194  | 0.148   | -0.0016 | 0.2246  |
| PVX_000630 | -0.2293 | 0.285   | 0.4259  | 0.6969  | 0.3424  | 0.149   | -0.4754 | -0.4864 | -0.8522 |
| PVX_097770 | -0.4224 | 0.4928  | 0.7196  | 0.8177  | 0.6569  | 0.7148  | -0.2049 | -0.351  | -0.5901 |
| PVX_085165 | -0.5406 | 0.2314  | 0.1714  | 0.2724  | 0.3373  | 0.045   | -0.2273 | -0.8837 | -1.0485 |
| PVX_082895 | -0.7193 | -0.4758 | 0.4919  | 0.9561  | 0.9159  | -0.3775 | -0.6072 | -0.5476 | -0.5722 |
| PVX_099715 | -0.3471 | 0.2913  | 0.6031  | 0.8022  | 0.3519  | -0.1686 | -0.2089 | 0.1213  | 0.1424  |
| PVX_041190 | 0.9828  | 0.3897  | 0.1513  | 0.1552  | -0.0721 | 0.2814  | 0.848   | 0.6452  | 0.5078  |
| PVX_091770 | -0.1556 | -0.0175 | 0.0419  | 0.1132  | -0.0959 | -0.1399 | 0.17    | -0.0924 | -0.1716 |
| PVX_091940 | 0.5005  | 0.3918  | 0.0974  | -0.1066 | -0.4326 | -0.5415 | -0.7735 | -0.8293 | -0.5462 |

|            |         |         |         |         |         |         |         |         |         |
|------------|---------|---------|---------|---------|---------|---------|---------|---------|---------|
| PVX_100565 | 0.3202  | 0.4725  | 0.3916  | 0.3876  | 0.2988  | 0.528   | 0.6224  | 0.6613  | 0.2895  |
| PVX_122115 | -0.3771 | -0.3442 | -0.3343 | 0.0175  | 0.2035  | 0.4713  | 0.0032  | -0.2607 | -0.149  |
| PVX_113550 | -0.0304 | -0.3231 | -0.6643 | -1.1038 | -1.0094 | -0.4043 | 0.9236  | 0.6212  | 0.5295  |
| PVX_114200 | -0.1577 | 0.2486  | 0.2699  | 0.0363  | 0.0065  | -0.8229 | -0.6068 | -0.0295 | -0.0541 |
| PVX_113790 | -1.3588 | -0.2706 | 0.3161  | 0.6424  | 0.3889  | -0.6997 | -0.8105 | -0.5841 | -0.8261 |
| PVX_122650 | -0.2768 | -0.1612 | -0.0892 | -0.2968 | 0.0328  | 0.2226  | 0.7442  | 0.4609  | -0.141  |
| PVX_002605 | 0.0867  | -0.0056 | -0.0834 | -0.2589 | -0.3743 | -0.4228 | -0.3359 | -0.2679 | -0.2    |
| PVX_003960 | 0.2293  | -0.245  | -0.1605 | -0.099  | 0.3197  | 0.5879  | 0.3457  | 0.2722  | 0.3111  |
| PVX_124120 | -0.0797 | -0.3873 | -0.4666 | -0.3855 | -0.3135 | -0.1912 | 0.8461  | 1.1427  | 0.554   |
| PVX_002750 | 0.0471  | -0.3584 | -0.6496 | -0.5586 | 0.0366  | 0.1414  | 0.0315  | 0.0107  | 0.2223  |
| PVX_117915 | -0.915  | -0.8198 | -0.4819 | -0.1376 | 0.1203  | 0.5473  | 0.3188  | -0.1803 | -0.4152 |
| PVX_099395 | -0.8829 | 0.2089  | 0.4212  | 0.5778  | 0.6514  | 0.5035  | -0.2036 | -0.674  | -0.852  |
| PVX_113980 | 0.0176  | 0.0857  | 0.1668  | 0.2492  | 0.3833  | -0.0283 | -0.3876 | -0.2086 | 0.0172  |
| PVX_090235 | 1.4035  | 0.1423  | -0.6507 | -0.9515 | -0.8321 | -1.0395 | -0.3583 | 1.1788  | 0.8284  |
| PVX_092595 | 0.6623  | 0.4894  | 0.221   | 0.2335  | 0.0668  | -0.0084 | -0.2061 | -0.2065 | -0.0531 |
| PVX_124715 | 0.038   | -0.2344 | -0.202  | -0.2801 | -0.2799 | -0.2925 | -0.1964 | -0.2557 | -0.2113 |
| PVX_097995 | 0.4536  | 0.6878  | 0.6305  | 0.4857  | 0.3303  | 0.2218  | -0.2974 | -0.6511 | -0.6077 |
| PVX_101415 | 0.41    | 0.0496  | -0.0679 | -0.613  | -1.0747 | -0.9115 | -0.3439 | 0.572   | 1.2918  |
| PVX_079780 | 0.2026  | 0.6218  | 0.7099  | 0.5279  | 0.3979  | 0.4355  | 0.168   | -0.3717 | -0.4772 |
| PVX_091085 | -0.1639 | -0.5448 | -0.7911 | -1.0261 | -1.097  | -0.7524 | -0.0877 | 0.842   | 0.6227  |
| PVX_079825 | 0.5131  | 0.2577  | -0.1004 | -0.3949 | -0.3536 | 0.0585  | 0.7625  | 0.9516  | 0.888   |
| PVX_090070 | 0       | 0.1388  | 0.2912  | 0.2929  | 0.4513  | 0.015   | -0.7782 | -1.0715 | -1.0268 |
| PVX_082365 | -1.1733 | -0.8946 | -0.9705 | -1.052  | -1.0862 | 0.1303  | 0.8919  | 1.3217  | 0.7628  |
| PVX_085085 | 0.7024  | 0.0935  | -0.1554 | -0.3742 | -0.4582 | 0.5503  | 0.5361  | 1.024   | 1.1156  |
| PVX_089880 | 0.332   | 0.0329  | -0.5171 | -0.7309 | -0.8947 | -0.8196 | -0.0207 | 0.2568  | 0.5312  |
| PVX_081265 | -0.3791 | -0.7985 | -0.1123 | 0.2714  | 0.4221  | -0.14   | -0.1244 | 0.2611  | 0.2297  |
| PVX_084720 | 0.1241  | 0.1076  | 0.1974  | -0.007  | -0.4233 | -0.9577 | -0.7795 | 1.0282  | 1.1378  |
| PVX_099500 | -0.0481 | 0.1973  | 0.1981  | 0.3913  | 0.3307  | 0.0476  | -0.1676 | -0.6949 | -0.9064 |
| PVX_117250 | 0.4229  | 0.017   | -0.143  | 0.1378  | 0.0493  | 0.0141  | 0.463   | 0.9036  | 0.8101  |
| PVX_092575 | 0.6459  | 0.0408  | -0.3879 | -0.8606 | -0.2274 | -0.2004 | 0.0356  | 0.4508  | 0.6901  |
| PVX_094715 | -0.0555 | 0.1562  | 0.356   | 0.4141  | 0.3925  | 0.1091  | -0.1858 | -0.1463 | 0.0383  |
| PVX_122790 | -0.1199 | -0.2406 | -0.5701 | -0.0383 | 0.2843  | 0.4352  | 0.4196  | 0.5121  | 0.5081  |
| PVX_090915 | -0.514  | 0.3848  | 0.3775  | 0.3885  | 0.4379  | 0.0677  | -0.4486 | -0.3954 | -0.3086 |
| PVX_087990 | 0.1475  | 0.2114  | 0.4282  | 0.7317  | 0.6548  | -0.0225 | -0.3305 | -0.009  | 0.2687  |
| PVX_000990 | 0.2515  | 0.5059  | 0.4018  | 0.2971  | 0.0931  | -0.4284 | -0.8157 | -0.7632 | -0.6104 |
| PVX_117265 | -0.5456 | 0.1205  | 0.4763  | 0.349   | 0.2024  | 0.6491  | 0.3502  | -0.2995 | -0.451  |
| PVX_091065 | 0.0293  | -0.1421 | -0.3453 | -0.4065 | -0.5442 | -0.7089 | 0.1498  | 0.8006  | 0.2917  |
| PVX_082355 | -1.327  | -0.3967 | -0.1089 | 0.1274  | 0.3849  | 0.573   | -0.2871 | -0.945  | -1.1154 |
| PVX_117840 | -0.1943 | -0.1657 | 0.1363  | 0.5343  | 0.8357  | 0.5324  | 0.0315  | -0.0211 | -0.0437 |
| PVX_003610 | 0.603   | -0.4633 | -0.6935 | -0.6096 | -0.1058 | 0.0864  | 0.1187  | -0.0721 | 0.1904  |
| PVX_118095 | 0.9214  | 0.685   | 0.6459  | 0.5138  | -0.3896 | -0.3479 | -0.8316 | -0.9379 | -0.7145 |
| PVX_088055 | -0.2787 | 0.1543  | 0.5511  | 0.6694  | 0.7716  | 0.2239  | 0.0421  | -0.1568 | -0.602  |
| PVX_096230 | -0.2622 | -0.1365 | -0.1596 | -0.1353 | -0.2627 | 0.138   | 0.2743  | 0.0973  | -0.3351 |
| PVX_093580 | -1.0599 | 0.3086  | 0.6652  | 0.575   | 0.2012  | -0.5432 | 0.1464  | -0.0169 | -0.4171 |
| PVX_115265 | 0.0006  | 0.4152  | -0.1387 | -0.6845 | -0.6426 | -0.7455 | 0.1333  | 1.1307  | 1.2093  |
| PVX_094795 | 0.7091  | 0.5866  | 0.1484  | 0.0392  | 0.1485  | -0.1314 | 0.0307  | 0.5977  | 0.8506  |
| PVX_097885 | -0.2136 | -0.2724 | -0.2131 | 0.0294  | 0.2681  | 0.4171  | 0.3628  | 0.299   | -0.0542 |
| PVX_099455 | -0.3182 | -0.2038 | -0.4462 | -0.5491 | -0.6491 | 0.184   | 0.4206  | -0.1859 | -0.3729 |
| PVX_088920 | -0.4326 | -0.4825 | -0.6706 | -0.7986 | -0.8176 | -0.4634 | 0.8221  | 0.7231  | 0.2919  |
| PVX_080200 | -0.8853 | 0.0677  | 0.7367  | 0.9948  | 0.744   | -0.6949 | -1.3361 | -1.5763 | -1.0803 |
| PVX_095180 | -0.9855 | -0.5319 | -0.4802 | -0.587  | -0.8236 | -0.3377 | -0.0274 | 0.2741  | -0.0477 |
| PVX_080110 | 0.0819  | 0.575   | 0.5462  | 0.4633  | 0.3969  | -0.0366 | -0.7925 | -0.8623 | -0.8192 |
| PVX_116645 | -0.224  | 0.0907  | 0.2387  | 0.5002  | 0.6227  | 0.5073  | 0.2768  | 0.0226  | -0.1308 |
| PVX_124165 | 1.1608  | 1.0761  | 0.8302  | 0.8272  | 0.7294  | 0.1794  | -0.2243 | -0.2115 | -0.4445 |
| PVX_091855 | 0.5159  | 0.4655  | 0.3576  | 0.2373  | -0.2281 | -0.2429 | -0.1893 | -0.5657 | -0.3761 |
| PVX_090205 | -1.4226 | -1.4673 | -1.7186 | -1.9763 | -1.7603 | -1.4627 | 1.1552  | 0.9053  | 0.0678  |
| PVX_117180 | 0.8317  | 0.4755  | 0.0322  | -0.3215 | -0.5635 | -0.4189 | -0.1097 | 0.6629  | 1.5716  |
| PVX_121890 | 0.3245  | 0.5511  | 0.3733  | 0.3545  | -0.105  | -0.7307 | -1.3927 | -1.3481 | -0.7405 |
| PVX_095460 | -0.7375 | 0.0566  | 0.3376  | 0.2126  | 0.2876  | 0.769   | 0.0359  | -1.0465 | -1.4232 |
| PVX_119685 | -0.152  | 0.3945  | 0.4269  | 0.5279  | 0.6268  | 0.3495  | -0.3229 | -0.4552 | -0.6102 |
| PVX_091975 | -0.2139 | 0.4722  | 0.5237  | 0.4897  | 0.6378  | 0.1931  | 0.0447  | 0.1277  | 0.122   |
| PVX_118345 | -0.6513 | 0.0799  | 0.3554  | 0.5014  | 0.4851  | 0.582   | -0.2809 | -0.9537 | -1.2766 |
| PVX_096090 | -0.856  | -1.0434 | -0.8193 | -0.2917 | 0.2199  | 0.4937  | 0.2117  | -0.2262 | -0.44   |

|            |         |         |         |         |         |         |         |         |         |
|------------|---------|---------|---------|---------|---------|---------|---------|---------|---------|
| PVX_117195 | 0.429   | 0.5166  | 0.3393  | 0.5706  | 0.3431  | 0.1829  | -0.228  | -0.5278 | -0.7294 |
| PVX_088230 | 0.7426  | 0.4888  | 0.42    | 0.4093  | 0.2594  | -0.0795 | -0.0501 | 0.5932  | 0.7472  |
| PVX_093705 | 0.4163  | 0.4931  | 0.3818  | 0.6247  | 0.3286  | 0.2666  | 0.0982  | 0.5288  | 0.4394  |
| PVX_119340 | -0.2067 | 0.144   | 0.4083  | 0.2615  | 0.5637  | 0.0963  | -0.1974 | -0.0955 | -0.1795 |
| PVX_113915 | 0.2168  | 0.3433  | 0.2567  | 0.3127  | 0.2977  | -0.0151 | -0.267  | -0.1461 | -0.4228 |
| PVX_003505 | 1.3123  | 0.8665  | 0.7188  | 0.4307  | 0.0797  | 0.089   | 0.1462  | 0.104   | 0.2491  |
| PVX_115275 | 0.7451  | 0.4983  | 0.554   | 0.5148  | 0.3509  | -0.1048 | -0.4334 | -0.2722 | -0.1503 |
| PVX_091635 | 0.7349  | 0.4569  | 0.5438  | 0.2569  | 0.023   | -0.0299 | 0.4426  | 0.2231  | 0.1102  |
| PVX_082410 | 0.3812  | -0.2217 | -0.5028 | -0.4564 | 0.2175  | 0.9237  | 0.6995  | 0.5505  | 0.6317  |
| PVX_091595 | 0.3628  | 0.3483  | 0.2426  | 0.3071  | 0.1879  | 0.3075  | -0.1318 | -0.2711 | -0.1441 |
| PVX_117610 | 0.5682  | 0.4861  | 0.0545  | -0.7998 | -1.1246 | -1.0178 | -0.4934 | 0.2952  | 1.3239  |
| PVX_123850 | 0.3821  | 0.159   | 0.0868  | -0.2112 | 0.0061  | 0.1861  | 0.1809  | -0.0765 | -0.0088 |
| PVX_119445 | 0.2942  | -0.0106 | -0.0079 | -0.0748 | 0.2334  | 0.7277  | 0.2539  | 0.4476  | 0.2848  |
| PVX_095195 | -0.0496 | -0.2838 | -0.4714 | -0.2851 | -0.3945 | -0.3143 | -0.2322 | -0.2844 | -0.0543 |
| PVX_115405 | -0.3598 | -0.6205 | -0.4098 | -0.3047 | -0.1155 | 0.2382  | 0.1105  | -0.174  | 0.2532  |
| PVX_087020 | 0.0169  | 0.4169  | 0.5745  | 0.4672  | 0.5225  | 0.1895  | -0.421  | -0.8675 | -0.9013 |
| PVX_084930 | -0.1573 | -0.1517 | 0.14    | 0.3781  | 0.7975  | 0.3317  | -0.0171 | -0.0638 | 0.1011  |
| PVX_000850 | -0.0842 | -0.1433 | -0.1983 | 0.0743  | 0.1298  | 0.5526  | 0.2301  | -0.0571 | -0.1135 |
| PVX_000840 | 0.0082  | -0.1667 | -0.0995 | -0.2063 | -0.1252 | 0.0593  | 0.1716  | 0.1895  | -0.0505 |
| PVX_124160 | -0.5947 | 0.1024  | 0.4033  | 0.5402  | 0.6617  | 0.1175  | -0.308  | -0.3667 | -0.5122 |
| PVX_092095 | 0.4188  | 0.6269  | 0.4259  | 0.5028  | 0.4513  | 0.7595  | 0.5899  | 0.7489  | 0.4275  |
| PVX_094760 | -0.4948 | 0.0611  | 0.4082  | 0.614   | 0.4343  | -0.3915 | -0.4831 | -0.2679 | -0.2794 |
| PVX_101550 | -1.7069 | -1.7611 | -1.7771 | -1.9854 | -1.5452 | 0.6694  | 1.4136  | 0.3826  | -0.1922 |
| PVX_117115 | 0.5855  | 0.3114  | 0.2387  | 0.3004  | 0.3372  | 0.3734  | 0.533   | 0.6566  | 0.5451  |
| PVX_081540 | -0.3791 | -0.3185 | -0.2739 | -0.0468 | 0.2573  | -0.0094 | 0.0807  | -0.0687 | -0.3968 |
| PVX_124200 | 0.5914  | 0.5212  | 0.2547  | 0.152   | -0.3937 | -0.6199 | -0.3234 | 0.0648  | 0.3155  |
| PVX_095035 | 0.3781  | 0.2322  | 0.0366  | 0.1312  | 0.4927  | 0.2     | -0.0222 | -0.4667 | 0.1151  |
| PVX_123920 | -1.391  | -0.4154 | -0.034  | 0.2414  | 0.3651  | 0.3815  | -0.261  | -0.9509 | -1.1498 |
| PVX_117680 | -0.1412 | -0.336  | -0.7181 | -0.6047 | -0.1312 | -0.3921 | 0.308   | 0.642   | 0.2891  |
| PVX_094615 | -1.0344 | -0.2699 | 0.0346  | 0.1249  | 0.3077  | 0.7952  | 0.4357  | -0.2548 | -0.8186 |
| PVX_116950 | 0.2585  | -0.1235 | -0.4098 | -0.5749 | 0.0526  | 0.4928  | 0.4796  | 0.4298  | 0.5986  |
| PVX_123985 | -0.3572 | 0.0342  | 0.2652  | 0.2861  | 0.2821  | -0.3276 | -0.7076 | -0.882  | -0.9142 |
| PVX_111210 | -0.0784 | 0.0012  | 0.0892  | 0.225   | 0.2277  | 0.0274  | -0.0454 | -0.1066 | -0.1709 |
| PVX_118385 | 0.3437  | -0.7242 | -0.497  | 0.0622  | 0.3927  | 0.2436  | -0.1905 | 0.6757  | 0.7923  |
| PVX_123235 | -0.6203 | -0.6555 | 0.0558  | 0.6962  | 0.9664  | 0.0147  | -0.3201 | -0.4063 | -0.3787 |
| PVX_091650 | 0.4262  | 0.4995  | 0.4981  | 0.3279  | 0.0894  | 0.021   | 0.0127  | 0.1553  | -0.0718 |
| PVX_094245 | 1.349   | 0.8007  | 0.9149  | 0.779   | 0.2939  | -0.3357 | -0.4603 | -0.0686 | 0.4906  |
| PVX_083200 | 0.671   | 0.3402  | -0.2003 | -0.6284 | -0.8826 | -0.4439 | 0.3127  | 0.7674  | 1.0854  |
| PVX_116920 | 0.3332  | 0.144   | 0.2454  | 0.306   | 0.1553  | -0.2829 | -0.12   | -0.1324 | -0.0213 |
| PVX_097640 | -1.0342 | -0.2546 | 0.3208  | 0.7002  | 0.7118  | 0.3652  | -0.1584 | -0.5816 | -0.6772 |
| PVX_094540 | -0.1393 | -0.2357 | -0.4995 | -0.6262 | -0.6677 | 0.2786  | 0.6209  | 0.4211  | 0.2906  |
| PVX_118495 | -0.5328 | 0.8664  | 1.0075  | 0.7135  | -0.1434 | -1.7287 | -1.6939 | -1.5398 | -1.2906 |
| PVX_115130 | -0.7387 | -0.5347 | -0.2219 | -0.0773 | 0.2318  | 0.2349  | 0.1824  | -0.3117 | -0.4424 |
| PVX_003500 | 0.1897  | 0.2906  | -0.007  | 0.1356  | 0.7379  | 0.5513  | 1.0523  | 0.4825  | 0.9985  |
| PVX_089760 | -0.38   | -0.3041 | -0.0082 | 0.4822  | 0.4799  | 0.0495  | 0.0335  | 0.4731  | 0.5479  |
| PVX_115415 | -0.4955 | 0.0499  | 0.4835  | 0.5147  | -0.0407 | -0.0956 | -0.1778 | -0.3753 | 0.1382  |
| PVX_119680 | 0.65    | 0.481   | 0.2854  | 0.0259  | -0.0275 | -0.3016 | 0.0192  | 0.2812  | 0.2625  |
| PVX_123270 | -0.3702 | -0.4086 | -0.2582 | -0.0656 | 0.095   | 0.4805  | 0.4529  | 0.1921  | -0.0579 |
| PVX_113940 | -0.0226 | 0.0271  | -0.0721 | -0.1934 | -0.0896 | 0.0094  | 0.5019  | 0.7652  | 0.4778  |
| PVX_122900 | 1.1131  | 0.1482  | 0.1739  | -0.2316 | 0.2414  | 0.24    | 0.448   | 1.1534  | 1.1346  |
| PVX_118330 | 0.0961  | 0.2237  | 0.3232  | 0.5244  | -0.1683 | -0.5392 | -0.5067 | -0.4152 | -0.209  |
| PVX_114995 | 0.2361  | 0.1066  | 0.2094  | 0.2891  | -0.0592 | 0.3099  | 0.0308  | 0.0157  | 0.2526  |
| PVX_088250 | 0.4383  | 0.4056  | 0.3189  | 0.2204  | 0.0701  | 0.2379  | 0.8     | 0.8504  | 0.4583  |
| PVX_081325 | -0.8035 | 0.0789  | 0.4453  | 0.6145  | 0.7702  | 0.7327  | -0.2956 | -0.8855 | -0.7248 |
| PVX_122140 | -0.2625 | -0.4549 | 0.0598  | 0.4262  | 0.4417  | -0.0222 | -0.1957 | -0.3107 | -0.1905 |
| PVX_090245 | 0.2299  | -0.2189 | -0.3789 | -0.436  | -0.7117 | -0.6063 | -0.4012 | 0.6043  | 0.8904  |
| PVX_092520 | -0.6473 | 0.1325  | 0.4347  | 0.6354  | 0.5917  | 0.4206  | -0.0193 | -0.295  | -0.5262 |
| PVX_000635 | 0.0965  | 0.1789  | 0.0107  | -0.2408 | -0.3025 | 0.0297  | 0.209   | 0.2177  | 0.3685  |
| PVX_108775 | 0.7813  | 1.0041  | 0.6659  | 0.6845  | 0.2272  | -0.0017 | 0.0626  | 0.2557  | 0.6761  |
| PVX_078695 | 0.7776  | 1.0971  | 1.0971  | 0.6779  | 0.379   | 0.1068  | -0.2059 | -0.5197 | -0.5839 |
| PVX_119255 | -0.619  | -0.6619 | -0.2951 | 0.3343  | 0.3173  | -0.0989 | -0.2625 | -0.3505 | -0.3998 |
| PVX_113630 | 0.8887  | -0.2165 | -0.6753 | -0.7384 | -0.4793 | -0.0168 | 0.6011  | 1.1504  | 1.141   |
| PVX_079990 | 0.0542  | 0.5593  | 0.5522  | 0.4564  | 0.0241  | 0.201   | 0.5803  | -0.0187 | -0.4001 |

|            |         |         |         |         |         |         |         |         |         |
|------------|---------|---------|---------|---------|---------|---------|---------|---------|---------|
| PVX_119555 | -0.7464 | -0.5121 | -0.3707 | -0.1694 | 0.1579  | 0.1636  | -0.1054 | -0.2455 | -0.6993 |
| PVX_089410 | 0.4039  | 0.41    | 0.311   | 0.0121  | -0.1195 | -0.3853 | -0.7082 | -0.2614 | 0.047   |
| PVX_116685 | -0.2309 | -0.259  | -0.6493 | -1.0761 | -0.7801 | -0.4609 | 0.6522  | 0.8813  | 0.5533  |
| PVX_097790 | 0.4216  | -0.2198 | -0.6811 | -0.3845 | 0.4445  | 0.9747  | 0.3979  | 0.1972  | 0.3797  |
| PVX_122485 | -0.5055 | 0.1406  | 0.4117  | 0.5036  | 0.5982  | -0.1446 | -0.3975 | -0.3872 | -0.3053 |
| PVX_002695 | 0.6429  | 0.6976  | 0.7225  | 0.9296  | 0.8655  | 0.8336  | 0.628   | 0.3514  | -0.0188 |
| PVX_090320 | -0.5777 | -0.1844 | -0.1884 | -0.1689 | -0.3567 | -0.4192 | -0.2853 | -0.4546 | -0.591  |
| PVX_117945 | 0.3365  | -0.0151 | 0.2464  | 0.4158  | 0.3308  | 0.3706  | 0.1459  | -0.2333 | -0.0548 |
| PVX_086155 | 0.0473  | -0.2734 | -0.3485 | -0.0944 | 0.3044  | 0.8137  | 0.2526  | 0.2899  | 0.0781  |
| PVX_101545 | -0.9656 | -1.2959 | -1.388  | -1.4819 | -1.6963 | -1.6306 | -1.264  | 0.9605  | 1.4332  |
| PVX_116870 | 0.0534  | 0.1103  | -0.0716 | 0.0032  | -0.23   | 0.1607  | -0.1354 | -0.4711 | -0.3794 |
| PVX_080325 | 1.352   | 0.7482  | 0.344   | -0.0563 | -0.0699 | 0.0842  | 0.4175  | 1.0157  | 1.5202  |
| PVX_113970 | 0.1221  | -0.2173 | -0.5172 | -0.6362 | -0.6982 | -0.0268 | -0.0333 | 0.3945  | 0.4381  |
| PVX_089595 | 0.0005  | -0.366  | -0.7748 | -0.8785 | -0.0328 | 0.7652  | 0.7622  | 0.3     | 0.3022  |
| PVX_087885 | -1.4467 | -1.5138 | -1.8449 | -2.2327 | -2.4597 | -2.1874 | 0.9092  | 0.8193  | -0.1855 |
| PVX_116895 | 0.0473  | 0.2104  | -0.1481 | 0.3666  | 0.1178  | -0.1321 | 0.7924  | 0.3914  | 0.7934  |
| PVX_081450 | 0.8136  | 0.7735  | 0.702   | 0.171   | -0.4141 | -0.6093 | -0.682  | 0.1034  | 0.1673  |
| PVX_002910 | 0.4007  | 0.1327  | -0.0479 | 0.0444  | -0.0404 | 0.0433  | -0.2309 | -0.4896 | -0.426  |
| PVX_089810 | 0.3869  | 0.4737  | 0.2718  | -0.1279 | -0.8664 | -1.4219 | -1.3368 | 0.1086  | 0.5471  |
| PVX_085735 | -0.0092 | 0.0868  | 0.1656  | 0.2322  | 0.4941  | 0.4426  | -0.4537 | -1.0253 | -1.2435 |
| PVX_002735 | 0.0964  | -0.036  | 0.4678  | 0.7277  | 0.7357  | 0.1429  | -0.0899 | 0.0468  | 0.2159  |
| PVX_092660 | -0.5117 | -0.8229 | -0.5069 | 0.0529  | 0.3245  | 0.3481  | 0.0059  | -0.2221 | -0.337  |
| PVX_119280 | 0.2383  | 0.4659  | 0.5862  | 0.4948  | -0.0152 | 0.0021  | -0.0375 | 0.0671  | 0.2629  |
| PVX_098665 | -0.3467 | 0.2876  | 0.1934  | 0.2385  | 0.6362  | 0.805   | 0.1146  | -0.7428 | -1.0051 |
| PVX_083580 | -0.628  | 0.4001  | 0.6619  | 0.5622  | 0.5089  | -0.3108 | -0.6386 | -0.4371 | -0.1422 |
| PVX_113965 | 1.0181  | 0.4214  | 0.227   | 0.2672  | 0.1151  | 0.2704  | 0.4212  | 0.755   | 0.8315  |
| PVX_116730 | -0.972  | -1.2035 | -1.2119 | -0.7902 | -0.1244 | 1.7164  | 1.2361  | -0.1156 | -0.452  |
| PVX_116625 | 0.3578  | 0.5108  | 0.5512  | 0.6065  | 0.2351  | 0.4757  | 0.044   | -0.2253 | -0.2355 |
| PVX_096965 | -0.5087 | -0.555  | -0.6843 | -0.8165 | -0.8486 | -0.82   | 0.5051  | 1.1398  | 0.9864  |
| PVX_095435 | -0.7062 | -0.4964 | -0.3174 | -0.2904 | -0.3325 | -0.4274 | -0.1706 | 0.7789  | 0.5154  |
| PVX_098735 | -0.4044 | -0.1187 | 0.2262  | 0.3963  | -0.1527 | 0.4526  | 0.305   | -0.2948 | -0.7522 |
| PVX_098825 | -0.7658 | 0.2209  | 0.576   | 0.4782  | 0.0186  | -0.6687 | -0.5538 | -0.1702 | -0.1515 |
| PVX_123555 | 0.522   | 0.2153  | -0.2299 | -0.4678 | -0.5942 | -0.6875 | 0.2879  | 0.9468  | 0.9692  |
| PVX_089500 | 0.3919  | 0.6972  | 0.6212  | 0.1473  | 0.3704  | -0.0067 | -0.0311 | 0.0322  | 0.0326  |
| PVX_083220 | -0.0158 | 0.0336  | 0.147   | 0.2085  | 0.4318  | 0.3809  | 0.0297  | -0.1696 | -0.1437 |
| PVX_114705 | 0.0217  | 0.1234  | 0.0018  | 0.0255  | 0.2361  | 0.2689  | 0.422   | -0.1119 | -0.1983 |
| PVX_118065 | 0.4036  | 0.7417  | 0.8605  | 0.7849  | 0.7812  | -0.0979 | -0.6979 | -0.7345 | -0.5926 |
| PVX_003990 | 0.3051  | 0.2478  | 0.3475  | -0.0365 | -0.2896 | 0.0146  | 0.3159  | 0.5712  | -0.0238 |
| PVX_122865 | -1.0751 | -1.1214 | -1.3032 | -1.4181 | -1.4304 | -0.6669 | 1.2214  | 1.4075  | 0.5643  |
| PVX_000930 | -0.4114 | -1.0593 | -1.4946 | -1.7422 | -1.6597 | 0.7821  | 1.1756  | 0.5444  | 0.139   |
| PVX_088220 | 0.2519  | 0.2007  | 0.5648  | 0.4437  | 0.3192  | -0.0358 | -0.1642 | 0.2571  | 0.4162  |
| PVX_091460 | -0.3465 | 0.005   | 0.4016  | 0.6369  | 0.6227  | 0.6258  | 0.3738  | 0.0734  | 0.0037  |
| PVX_099215 | 0.3812  | 0.167   | 0.1399  | 0.3772  | 0.4772  | 0.3079  | -0.0723 | -0.082  | 0.0575  |
| PVX_089625 | 0.0861  | 0.3445  | 0.3199  | 0.2636  | 0.1173  | 0.4483  | -0.4769 | -0.5469 | -0.8509 |
| PVX_095115 | 0.7006  | 0.7296  | 0.4982  | 0.2908  | 0.0847  | -0.3924 | -0.5068 | -0.4613 | -0.3852 |
| PVX_092395 | 0.3398  | -0.2294 | -0.2398 | -0.1277 | 0.0825  | -0.1309 | 0.2136  | 0.4296  | 0.5754  |
| PVX_098970 | -0.059  | 0.0965  | 0.1058  | -0.0437 | -0.0932 | 0.493   | 0.8136  | 0.5319  | 0.4714  |
| PVX_119420 | 0.3582  | -0.421  | -0.2536 | 0.1022  | 0.3093  | 0.4139  | 0.3693  | 0.3639  | 0.48    |
| PVX_094935 | 0.4289  | 0.4719  | 0.3746  | 0.6148  | 0.5491  | 0.4013  | -0.0254 | -0.3475 | -0.6059 |
| PVX_116560 | 1.2748  | 1.2768  | 1.2422  | 1.316   | 1.0851  | 0.3452  | 0.1838  | 0.183   | -0.0423 |
| PVX_114640 | 1.013   | 0.2606  | -0.0767 | -0.716  | -0.8982 | -0.7673 | -0.1307 | 0.7558  | 1.2809  |
| PVX_089800 | -0.7607 | -0.3605 | -0.0832 | -0.5644 | -0.3704 | -0.7763 | -0.2758 | 1.1755  | 1.1667  |
| PVX_002915 | 1.4261  | 0.7975  | 0.4261  | 0.0892  | -0.3011 | -0.7409 | -0.8247 | -0.0355 | 0.1876  |
| PVX_088940 | 0.534   | 0.1915  | -0.1472 | -0.3892 | -0.1385 | 0.5116  | 0.4122  | 0       | 0.0886  |
| PVX_098795 | 0.1912  | 0.2458  | 0.1229  | 0.0449  | -0.0275 | 0.2437  | 0.1501  | -0.1376 | -0.294  |
| PVX_003635 | -0.4188 | -0.8453 | -1.1483 | -1.1221 | -0.8516 | 0.1271  | 1.4206  | 1.222   | 0.4796  |
| PVX_084305 | -0.6445 | -0.6629 | -0.5942 | -0.3493 | 0.2771  | 0.3945  | -0.5814 | 0.1676  | 0.588   |
| PVX_090130 | 0.8208  | -0.2557 | -0.502  | -0.4518 | -0.071  | -0.4038 | -0.0421 | 0.6694  | 1.1682  |
| PVX_001760 | -1.2346 | -0.2347 | 0.2019  | 0.5393  | 0.3827  | 0.7411  | 0.057   | -1.145  | -1.5023 |
| PVX_085290 | 0.336   | 0.2743  | 0.3132  | 0.3363  | 0.6746  | 0.2569  | -0.3069 | -0.63   | -0.4566 |
| PVX_093540 | 0.1453  | 0.1905  | 0.4271  | 0.5384  | 0.6767  | 0.7565  | 0.1341  | 0.0211  | -0.2405 |
| PVX_092470 | -0.3169 | -0.3179 | -0.0754 | -0.1198 | -0.0685 | -0.2574 | 0.9016  | 0.9466  | 0.3506  |
| PVX_114130 | -0.1121 | -0.5347 | -0.3326 | -0.0493 | 0.2884  | 0.472   | -0.0706 | -0.0804 | 0.1602  |

|            |         |         |         |         |         |         |         |         |         |
|------------|---------|---------|---------|---------|---------|---------|---------|---------|---------|
| PVX_081225 | 0.1164  | 0.3791  | 0.7211  | 0.7021  | 0.5356  | 0.1121  | -0.0895 | -0.0725 | 0.0107  |
| PVX_115095 | -0.6146 | -0.4868 | -0.3351 | -0.5088 | -0.1394 | 0.8409  | 0.7671  | 0.2371  | -0.0669 |
| PVX_088805 | -0.5573 | -0.4001 | -0.1938 | 0.0183  | -0.3108 | 0.924   | 1.3592  | 0.412   | 0.4175  |
| PVX_092070 | -0.3362 | -0.1063 | -0.1972 | -0.3687 | -0.2218 | -0.4695 | -1.3262 | 0.1717  | 0.6514  |
| PVX_082575 | 0.2244  | 0.5848  | 0.6735  | 0.8257  | 0.5605  | 0.4657  | 0.3596  | -0.1194 | -0.2449 |
| PVX_085390 | 0.8984  | 0.5194  | 0.4448  | 0.1029  | -0.1777 | -0.1627 | -0.0239 | 0.9194  | 1.4252  |
| PVX_086340 | 0.3726  | 0.2429  | 0.1365  | 0.181   | -0.045  | 0.3458  | 0.0225  | -0.3266 | -0.4022 |
| PVX_117735 | 0.5567  | 0.3071  | -0.0206 | -0.5847 | -0.8671 | -1.0047 | -0.5476 | 0.1989  | 1.2587  |
| PVX_001050 | -0.1199 | -0.3091 | -0.0164 | 0.0456  | 0.0104  | 0.0599  | 0.4962  | 0.3781  | 0.0344  |
| PVX_118420 | 0.1781  | 0.0518  | -0.1056 | 0.0465  | 0.3676  | 0.3642  | -0.3238 | -0.1902 | -0.1943 |
| PVX_117765 | 0.1563  | -0.2105 | -0.3126 | -0.2619 | -0.3494 | 0.4779  | 1.0073  | 0.5106  | 0.2389  |
| PVX_000700 | 0.981   | 0.6308  | 0.4805  | 0.097   | -0.3455 | -0.4654 | -0.142  | 0.8471  | 1.4398  |
| PVX_117350 | -0.7132 | -0.4216 | -0.1539 | 0.0222  | 0.2463  | 0.2888  | 0.0198  | -0.1878 | -0.4113 |
| PVX_124130 | -0.2507 | -0.2793 | -0.3852 | 0       | 0.5579  | 0.3594  | 0.0484  | -0.1174 | -0.0397 |
| PVX_092965 | -0.4516 | -0.7665 | -0.2245 | 0.4     | 0.6901  | -0.2031 | -0.7935 | -0.6856 | -0.2729 |
| PVX_091480 | -0.6294 | -0.2021 | 0.1343  | 0.3744  | 1.0253  | 0.6565  | 0.1193  | -0.2776 | -0.3554 |
| PVX_117030 | 0.6871  | 0.8524  | 0.627   | 0.5186  | 0.3891  | -0.1386 | -1.1461 | -1.6719 | -1.5796 |
| PVX_099890 | 0.3755  | 0.3696  | 0.2217  | 0.4013  | 0.808   | 0.3979  | -0.1282 | -0.4115 | -0.6132 |
| PVX_096975 | 0.7065  | 0.6878  | 0.2639  | 0.1659  | 0.1005  | -0.0553 | -1.0555 | -1.0735 | -0.3352 |
| PVX_094250 | 0.0907  | -0.2305 | -0.3195 | -0.3764 | 0.249   | 0.5471  | 0.5629  | 0.7194  | 0.6367  |
| PVX_083110 | -0.6032 | -1.042  | -1.1456 | -1.1611 | -0.8218 | -0.1174 | 0.6163  | 1.034   | 0.4639  |
| PVX_113430 | 0.1523  | 0.1284  | 0.2158  | 0.1687  | 0.2651  | 0.0493  | 0.1433  | -0.2261 | -0.3694 |
| PVX_116810 | 0.2923  | -0.055  | -0.607  | -0.7812 | -0.3412 | -0.0596 | 0.511   | 0.885   | 0.5976  |
| PVX_100725 | 0.2721  | 0.3315  | 0.2092  | 0.0778  | 0.2731  | 0.6126  | 0.3273  | -0.3287 | -0.4572 |
| PVX_090905 | 0.2398  | -0.5502 | -0.8976 | -0.781  | -0.6104 | -1.0303 | 0.1726  | 0.8222  | 0.955   |
| PVX_088960 | -1.1436 | -0.5004 | -0.3868 | -0.1731 | 0.3354  | 0.764   | 0.029   | -0.9525 | -1.1722 |
| PVX_086175 | -0.7347 | 0.0418  | 0.3649  | 0.4186  | 0.3981  | 0.0571  | -0.0049 | -0.4832 | -0.665  |
| PVX_113640 | -0.3172 | -0.6204 | -0.9607 | -1.4302 | -1.316  | -1.1165 | 1.2044  | 1.2726  | 0.7036  |
| PVX_002510 | 0.4854  | -0.3453 | -0.6316 | -0.9154 | -0.9537 | -0.692  | -0.5905 | 0.396   | 0.8898  |
| PVX_113875 | -0.7681 | -0.2862 | 0.2833  | 0.4727  | 0.8881  | 0.3896  | -0.209  | -0.4971 | -0.8089 |
| PVX_114885 | 0.2499  | 0.1464  | 0.2083  | 0.4197  | 0.6029  | 0.5271  | 0.1989  | -0.158  | -0.0092 |
| PVX_000755 | -0.3202 | -0.5447 | -0.5233 | -0.5899 | -0.5559 | -0.0883 | 0.9622  | 0.7074  | 0.079   |
| PVX_123455 | -0.1763 | -0.0607 | -0.1749 | -0.3066 | -0.0006 | 0.3961  | 0.4166  | 0.0953  | -0.0179 |
| PVX_086165 | -0.4287 | 0.2782  | 0.8079  | 0.9076  | 0.6012  | 0.0486  | -0.3854 | -0.3076 | 0.0324  |
| PVX_116550 | -0.1598 | -0.2217 | -0.2406 | -0.1291 | 0.3     | 0.7254  | 0.4513  | 0.1995  | 0.0347  |
| PVX_089975 | 0.313   | -0.0072 | -0.2201 | -0.2372 | -0.1623 | -0.4009 | -0.1058 | -0.0033 | -0.1998 |
| PVX_123125 | -0.3705 | -0.2144 | -0.3373 | -0.3905 | -1.0546 | -0.6562 | -0.1504 | 0.5807  | 0.8087  |
| PVX_094280 | 0.6252  | 0.7503  | 0.3357  | 0.0452  | 0.0266  | 0.2302  | -0.1797 | -0.0883 | -0.0706 |
| PVX_098845 | -0.6499 | -0.7902 | -0.5448 | -0.1766 | 0.1432  | -0.0964 | 0.2989  | 0.8856  | 0.4556  |
| PVX_116585 | 0.0377  | -0.3349 | -0.3716 | -0.7878 | -0.4049 | 0.1489  | 0.516   | 0.2434  | 0.0101  |
| PVX_122555 | 0.1455  | 0.1835  | 0.0645  | 0.1174  | 0.1495  | -0.3435 | -0.5711 | -0.7967 | -0.5332 |
| PVX_091930 | 1.287   | 0.5656  | 0.5277  | 0.0469  | -0.2063 | -0.5873 | -0.7065 | -0.4853 | 0.2969  |
| PVX_092100 | -0.2021 | 0.1229  | 0.1292  | 0.3838  | 0.0603  | -0.2992 | -0.247  | 0.3495  | 0.2906  |
| PVX_122330 | -0.1273 | -0.1977 | -0.067  | 0.0909  | 0.0846  | 0.1622  | 0.0512  | 0.1498  | 0.0087  |
| PVX_123200 | -1.0019 | -0.0892 | 0.0514  | 0.166   | 0.2464  | 0.2067  | -0.4204 | -0.8883 | -0.9454 |
| PVX_101015 | 1.0325  | 0.7196  | 0.3138  | 0.1852  | -0.0166 | -1.3592 | -1.8011 | -1.6734 | -0.9872 |
| PVX_095355 | -0.3292 | -0.8136 | -0.8992 | -0.0789 | 0.3486  | 0.6363  | 0.3615  | -0.0166 | 0.0641  |
| PVX_001030 | -0.0084 | 0.088   | 0.3456  | 0.2779  | 0.5475  | 0.3153  | -0.1919 | -0.6168 | -0.5844 |
| PVX_113480 | -0.111  | -0.0595 | 0.2659  | 0.3597  | 0.3541  | 0.1688  | -0.0901 | -0.1874 | 0.0976  |
| PVX_117280 | 0.018   | 0.3135  | 0.4594  | 0.6364  | 0.6831  | 0.1354  | 0.2839  | 0.1242  | 0.0779  |
| PVX_119245 | 0.5193  | 0.5422  | 0.3937  | 0.465   | 0.172   | 0.1857  | -0.3231 | -0.3342 | -0.0809 |
| PVX_092060 | -0.0333 | -0.656  | -1.0793 | -1.4908 | -1.3191 | -1.1141 | 1.4507  | 1.0999  | 0.4501  |
| PVX_097695 | -1.1274 | -1.2503 | -1.3981 | -1.6288 | -1.9194 | -1.2116 | -0.4363 | -0.4255 | -0.5697 |
| PVX_080125 | -0.2609 | -0.1649 | 0.2688  | 0.5615  | 0.5741  | 0.4511  | 0.3579  | -0.0166 | 0.211   |
| PVX_101565 | 0.9383  | 1.1543  | 0.9827  | 0.2205  | -0.5531 | -0.606  | -0.1481 | 0.3456  | 1.0418  |
| PVX_000710 | -0.7628 | -1.0514 | -1.1867 | -1.0757 | -0.2993 | -0.0313 | 0.696   | 0.3593  | -0.1282 |
| PVX_101405 | 0.125   | 0.057   | -0.122  | -0.06   | 0.0386  | 0.0451  | 0.6485  | 0.0767  | -0.504  |
| PVX_081435 | 1.0775  | 0.6809  | 0.6701  | 0.6016  | 0.4294  | -0.3678 | -0.6844 | -0.8226 | -0.4422 |
| PVX_086975 | -0.7147 | -0.8119 | -1.063  | -1.0899 | -1.1114 | -0.3607 | 1.0703  | 0.926   | 0.6394  |
| PVX_085255 | -0.0135 | -0.3465 | -0.5425 | -0.3911 | -0.0204 | 0.5338  | 0.9679  | 0.4425  | -0.0454 |
| PVX_086280 | -0.313  | -0.6015 | -0.8315 | -0.6849 | -0.7797 | -0.2166 | 0.2346  | 0.5898  | 0.3702  |
| PVX_123445 | -0.35   | -0.3363 | 0.0173  | 0.2038  | 0.0635  | -0.1643 | 0.1102  | 0.1084  | 0.056   |
| PVX_117900 | 0.6716  | -0.0244 | -0.1249 | -0.7598 | -1.116  | -1.0175 | -0.3829 | 0.7794  | 1.8134  |

|            |         |         |         |         |         |         |         |         |         |
|------------|---------|---------|---------|---------|---------|---------|---------|---------|---------|
| PVX_087075 | 0.0884  | -0.1309 | 0.3886  | 0.2785  | 0.523   | 0.5657  | -0.0809 | -0.1799 | -0.2528 |
| PVX_081285 | 0.6853  | 0.5488  | 0.5765  | 0.6153  | 0.7231  | 0.7775  | 0.5431  | 0.1518  | 0.0072  |
| PVX_089750 | 0.4267  | 0.8279  | 0.7193  | 0.628   | 0.7177  | 0.5244  | -0.1932 | -0.7622 | -0.8968 |
| PVX_117745 | -0.6059 | 0.6882  | 1.1131  | 1.4106  | 1.2157  | -0.1242 | -0.6956 | -1.0051 | -1.3918 |
| PVX_082960 | 0.0086  | 0.2875  | 0.1954  | -0.0548 | -0.2699 | -0.7659 | -0.5544 | 0.047   | -0.1799 |
| PVX_084970 | -0.5664 | -0.7798 | -0.8418 | -0.8645 | -0.9349 | -0.7282 | 1.1371  | 1.1354  | 0.337   |
| PVX_001045 | 0.6698  | 0.2212  | 0.2879  | 0.2387  | 0.0104  | 0.0294  | 0.3211  | 0.1213  | 0.1187  |
| PVX_092045 | 0.4274  | 0.5068  | 0.5568  | 0.5288  | 0.395   | 0.2969  | -0.0301 | -0.085  | -0.0945 |
| PVX_121940 | 0.4856  | 0.0394  | 0.0409  | 0.0574  | 0.9951  | 0.3004  | -0.1014 | 0.6974  | 0.8554  |
| PVX_064190 | 1.5936  | 1.1746  | 0.9655  | 0.5867  | 0.4233  | 0.3693  | 0.0978  | -0.0838 | 0.1043  |
| PVX_123945 | 0.2127  | 0.2446  | 0.1877  | 0.1866  | 0.0793  | -0.5948 | -0.851  | -0.6932 | -0.6158 |
| PVX_081760 | -0.1616 | 0.9048  | 1.132   | 0.9465  | 0.9026  | -0.2926 | -0.6765 | -0.8469 | -0.5182 |
| PVX_117605 | -0.4253 | 0.0456  | 0.1386  | 0.3091  | 0.3199  | 0.1485  | -0.5023 | -0.4246 | -0.1852 |
| PVX_088170 | -0.8328 | -0.279  | -0.1421 | 0.2719  | 0.3277  | 0.3754  | -0.4341 | -1.0677 | -0.7047 |
| PVX_115345 | 0.1982  | 0.5398  | 0.643   | 0.8569  | 0.4326  | 0.5381  | -0.4066 | -0.9543 | -0.8869 |
| PVX_123505 | -0.8391 | -0.5581 | 0.1679  | 0.5426  | 0.5568  | 0.8283  | 0.0079  | -0.2399 | -0.3253 |
| PVX_099520 | -0.6262 | -0.2902 | -0.2157 | 0.0901  | 0.0934  | 0.1046  | -0.1099 | -0.1336 | -0.365  |
| PVX_122315 | -0.4123 | -0.1725 | -0.564  | -0.441  | -0.5    | -0.6987 | -0.5648 | -0.3524 | -0.6383 |
| PVX_095125 | -0.0611 | -0.1428 | -0.379  | -0.7163 | -0.714  | -0.4673 | 0.7469  | 0.8737  | 0.7639  |
| PVX_094345 | 0.0712  | 0.2012  | 0.3224  | 0.2846  | 0.4729  | 0.3579  | -0.4077 | -1.0006 | -1.2286 |
| PVX_118225 | 0.1659  | 0.1967  | 0.4985  | 0.6382  | 0.4389  | 0.2022  | -0.4442 | -0.5559 | -0.5492 |
| PVX_083285 | -0.567  | -0.3029 | -0.4219 | -0.3261 | -0.0333 | -0.0436 | 1.6598  | 1.7029  | 0.8305  |
| PVX_087690 | 0.2441  | 0.2614  | 0.3777  | 0.4807  | 0.6919  | 0.2865  | -0.0658 | 0.1556  | 0.5457  |
| PVX_114680 | -1.2833 | -0.0159 | 0.0444  | 0.425   | 0.4689  | 0.781   | -0.2631 | -1.0067 | -1.3153 |
| PVX_099445 | -0.0931 | 0.1858  | 0.5231  | 0.6666  | 0.675   | 0.2509  | -0.0772 | -0.2751 | -0.4691 |
| PVX_091470 | -0.4867 | -0.4983 | -0.537  | -0.3545 | -1.1211 | -1.943  | -1.0212 | 1.0604  | 0.8775  |
| PVX_122990 | 0.0705  | 0.1541  | 0.3203  | 0.2807  | 0.478   | 0.3104  | 0.0309  | 0.2183  | 0.1482  |
| PVX_114550 | -0.5207 | -0.3404 | 0.2696  | 0.6281  | 0.855   | 0.2573  | -0.1947 | -0.0931 | -0.5027 |
| PVX_089455 | -1.746  | -1.788  | -1.722  | -1.8033 | -2.0652 | -2.1133 | -1.6678 | 1.2771  | 1.3975  |
| PVX_003795 | -0.8457 | -0.9201 | -1.0485 | -1.1231 | -0.574  | 0.9872  | 1.3896  | 0.693   | -0.2722 |
| PVX_113690 | -1.2075 | -1.1575 | -1.0718 | -0.7752 | -0.0973 | 0.216   | 0.9691  | 0.4878  | -0.0238 |
| PVX_081535 | -0.5846 | -0.4711 | -0.0247 | 0.2552  | 0.4219  | 0.1257  | -0.4006 | -0.8114 | -0.7259 |
| PVX_086995 | -0.1971 | -0.3382 | 0.0258  | 0.3714  | 0.6167  | 0.5071  | 0.0389  | 0.0364  | -0.1018 |
| PVX_117150 | -0.6678 | -0.0105 | 0.3539  | 0.8188  | 0.4716  | 0.8612  | 0.3426  | -0.4099 | -0.6284 |
| PVX_092895 | 0.2758  | 0.3122  | 0.5145  | 0.4055  | 0.4145  | 0.3307  | 0.1286  | 0.0322  | 0.1637  |
| PVX_122595 | -0.0777 | 0       | 0.1191  | 0.028   | -0.27   | -0.1367 | -0.0325 | -0.2679 | -0.1594 |
| PVX_087105 | -0.9132 | -0.7273 | -0.4098 | -0.2358 | 0.2107  | 0.7702  | 0.5446  | -0.3421 | -0.7433 |
| PVX_081815 | -0.0276 | -0.3674 | -0.451  | -0.6635 | -0.4541 | -0.2468 | 0.4365  | 0.9593  | 0.821   |
| PVX_003510 | -0.5289 | -0.6276 | -0.8435 | -0.8567 | -0.8379 | -0.6738 | -0.8309 | -0.7736 | -0.8293 |
| PVX_118030 | -0.5577 | -0.6655 | -0.7459 | -0.6294 | -0.4806 | 0.3386  | 0.7371  | 0.1572  | -0.2969 |
| PVX_117540 | 0.2902  | -0.1367 | -0.0121 | 0.0192  | 0.4101  | 0.4031  | 0.0441  | 0.3599  | 0.6085  |
| PVX_072190 | 0.8275  | 0.5687  | 0.3695  | 0.3446  | 0.223   | 0.1981  | -0.2109 | -0.2117 | -0.0147 |
| PVX_111270 | 0.5699  | 0.537   | 0.2201  | 0.0229  | -0.0035 | -0.0352 | 0.1006  | -0.3281 | -0.3003 |
| PVX_123825 | -0.4094 | 0.0035  | 0.1547  | 0.4613  | 0.4566  | 0.0478  | -0.6071 | -0.7361 | -0.6441 |
| PVX_062690 | -1.2666 | -1.2104 | -1.2389 | -0.7735 | -1.0812 | -1.1259 | -1.014  | -1.007  | -1.0498 |
| PVX_122435 | -0.1434 | -0.0569 | -0.3062 | 0.0186  | -0.0154 | 0.0451  | 0.3323  | 0.4986  | 0.4181  |
| PVX_002810 | 0.2026  | 0.4418  | 0.4755  | 0.2554  | -0.0151 | -0.452  | -0.3307 | -0.063  | 0.1171  |
| PVX_082700 | -1.67   | -1.7052 | -2.091  | -2.07   | -2.5101 | -0.8681 | 1.2996  | 1.2427  | 0.3464  |
| PVX_088850 | 1.2248  | 0.1478  | -0.8254 | -1.4331 | -1.7369 | -2.1193 | -1.8566 | 0.7606  | 1.2707  |
| PVX_092415 | -0.3519 | -0.7348 | -0.7874 | -0.6216 | -0.371  | 0.6302  | 0.9727  | 0.7507  | 0.5507  |
| PVX_081360 | 0.3373  | -0.2063 | 0.0435  | 0.1601  | -0.0615 | -0.5588 | -0.4825 | 0.3968  | 0.4212  |
| PVX_094600 | 0.233   | -0.0479 | -0.1884 | -0.2605 | -0.1887 | 0.1319  | 0.4552  | -0.0579 | -0.5319 |
| PVX_098000 | -1.5423 | -0.9602 | 0.0519  | 0.2688  | 0.4391  | 0.6029  | 0.0891  | -0.4802 | -0.8541 |
| PVX_089425 | -0.7936 | -0.1317 | 0.1085  | 0.0682  | 0.3059  | 0.0155  | -1.3733 | -1.864  | -1.4407 |
| PVX_081445 | -0.5065 | -0.6833 | -0.6675 | -0.1468 | 0.115   | 1.0264  | 0.7421  | 0.2941  | -0.1064 |
| PVX_119760 | -0.2056 | -0.2164 | 0.2336  | 0.3724  | 0.5378  | 0.2663  | 0.3434  | 0.1011  | -0.0282 |
| PVX_080685 | -0.1289 | -0.2525 | -0.4952 | -0.7982 | -0.8014 | -0.0466 | 0.4868  | 0.3553  | -0.1273 |
| PVX_001695 | -1.7754 | -1.7582 | -2.1283 | -2.4262 | -2.4239 | -2.2409 | -1.3446 | 1.3349  | 1.319   |
| PVX_113760 | -0.5177 | -0.4223 | -0.5327 | -0.3065 | 0.0068  | -0.1106 | -0.2885 | -0.3392 | -0.3722 |
| PVX_000550 | -0.2972 | -0.6522 | -0.726  | -1.0229 | -0.8915 | -0.7242 | -0.0925 | 0.0831  | 0.1519  |
| PVX_096205 | 0.3045  | 0.6255  | 0.8004  | 0.5393  | 0.2577  | -0.1201 | -0.3892 | -0.3742 | -0.2397 |
| PVX_119545 | 0.6271  | 0.8459  | 0.7454  | 0.7428  | 0.5732  | 0.4214  | -0.0226 | -0.2449 | -0.2922 |
| PVX_123415 | -0.4332 | 0.0203  | 0.0192  | 0.09    | -0.2085 | -0.1595 | -0.1458 | 0.1336  | 0.2533  |

|            |         |         |         |         |         |         |         |         |         |
|------------|---------|---------|---------|---------|---------|---------|---------|---------|---------|
| PVX_113390 | 0.5874  | 0.1943  | 0.4409  | 0.3368  | 0.1059  | -0.24   | -0.0827 | 0.0984  | -0.023  |
| PVX_101135 | -0.0384 | 0.2514  | 0.3614  | 0.4529  | 0.0932  | 0.0855  | -0.8212 | -1.3372 | -1.59   |
| PVX_087890 | 0.4246  | 0.2161  | 0.186   | 0.0894  | 0.0392  | 0.1719  | 0.5162  | 0.3267  | 0.2242  |
| PVX_099695 | 0.0582  | -0.0751 | -0.3558 | -0.3423 | -0.0954 | 0.8903  | 0.6713  | 0.2872  | 0.2045  |
| PVX_117585 | 0.4119  | 0.4964  | 0.4063  | 0.2701  | 0.049   | -0.1463 | -0.2325 | -0.0137 | -0.0246 |
| PVX_113650 | -0.6344 | -0.3768 | 0.3311  | 0.6001  | 0.8776  | 0.0457  | -0.5896 | -0.8749 | -0.7413 |
| PVX_092055 | 0.4937  | 0.3014  | 0.1218  | 0.2202  | 0.4412  | 0.4193  | 0.0996  | 0.0101  | 0.1227  |
| PVX_122645 | 0.7098  | 0.4288  | 0.4252  | 0.5172  | 0.4262  | 0.1957  | -0.0824 | -0.5383 | -0.5103 |
| PVX_119650 | 0.2394  | 0.0188  | -0.0789 | -0.2786 | -0.1417 | 0.2977  | 1       | 0.6025  | 0.6004  |
| PVX_114425 | 0.1831  | -0.0566 | -0.2479 | -0.5449 | -0.0133 | 0.3327  | 0.4101  | 0.2007  | 0.2785  |
| PVX_089875 | -1.9701 | -1.9623 | -2.2234 | -2.3645 | -2.5269 | -2.4111 | -2.1359 | -0.4987 | -0.1909 |
| PVX_117500 | -0.0412 | 0.2842  | 0.4211  | 0.5793  | 0.6411  | -0.1128 | -0.4724 | -0.7399 | -0.6647 |
| PVX_000955 | -0.0512 | 0.4313  | 0.4256  | 0.3717  | 0.1261  | -0.5317 | -0.9422 | -0.6499 | -0.3478 |
| PVX_112660 | 0.661   | 1.099   | 1.0368  | 0.6976  | -0.369  | -1.0761 | -0.9664 | -0.7069 | -0.2155 |
| PVX_098600 | 0.0532  | -0.0379 | -0.3621 | -0.2977 | -0.7134 | -0.0894 | -0.0648 | -0.0935 | 0.4505  |
| PVX_122405 | 0.1784  | 0.3212  | 0.1657  | 0.1071  | 0.2415  | 0.2353  | 0.1136  | -0.2998 | -0.2097 |
| PVX_086900 | 0.9761  | 0.1273  | -0.1185 | -0.1863 | -0.4666 | -0.5371 | -0.818  | -1.0053 | -0.6758 |
| PVX_113595 | -0.242  | 0.0806  | 0.4932  | 0.6516  | 0.4638  | -0.1319 | -0.7049 | -1.0361 | -0.8322 |
| PVX_083570 | -2.3104 | -2.6936 | -2.8022 | -2.9265 | -2.97   | -2.8424 | -2.4441 | 0.877   | 1.2609  |
| PVX_090160 | 0.0606  | 0.3114  | 0.4395  | 0.3612  | 0.1214  | -0.0267 | -1.1076 | -1.645  | -1.8168 |
| PVX_092325 | -0.8802 | -0.9475 | -0.7705 | -0.5325 | -0.2745 | 0.4083  | 1.0028  | 0.786   | 0.189   |
| PVX_122370 | 0.5182  | 0.4426  | 0.6358  | 0.5353  | 0.6186  | 0.0962  | -0.3053 | -0.1221 | 0.0179  |
| PVX_111220 | -0.2351 | 0.1235  | 0.5421  | 0.6996  | 0.6625  | 0.7521  | 0.227   | -0.1958 | -0.225  |
| PVX_080165 | 0.2799  | -0.2412 | -0.1978 | 0.1462  | 0.3587  | -0.1732 | 0.283   | 0.7038  | 0.6615  |
| PVX_080160 | -0.8154 | 0.095   | 0.3867  | 0.4879  | 0.5899  | 0.4519  | -0.1889 | -0.5362 | -0.6041 |
| PVX_084610 | -0.9564 | -0.4846 | 0.1277  | 0.3099  | 0.342   | 0.2276  | 0.6117  | 0.3202  | -0.1658 |
| PVX_087705 | -0.0946 | 0.3794  | 0.2752  | 0.2381  | -0.0125 | -0.3326 | -0.3632 | -0.1179 | 0.1323  |
| PVX_083350 | -0.8685 | -0.1975 | -0.0375 | -0.084  | -0.4594 | -0.7893 | -1.0446 | 0.3019  | 0.5757  |
| PVX_085865 | 0.2373  | 0.4771  | 0.6225  | 0.5036  | 0.6133  | -0.0126 | -0.2492 | -0.2593 | -0.2772 |
| PVX_002615 | 0.3467  | 0.5423  | 0.6436  | 0.6329  | 0.6346  | 0.3459  | -0.2503 | -0.7563 | -0.696  |
| PVX_099835 | -0.5753 | -0.0526 | 0.0215  | 0.1676  | 0.5478  | 0.6257  | 0.7142  | 0.183   | -0.1284 |
| PVX_122895 | 0.4474  | 0.3892  | 0.0095  | -0.1105 | -0.1834 | 0.3947  | 0.807   | 0.1759  | 0.2052  |
| PVX_122915 | 0.1542  | -0.0116 | -0.4407 | -0.8    | -0.4799 | 0.258   | 0.9051  | 0.9237  | 0.9738  |
| PVX_084170 | 0.7981  | 0.4884  | 0.1079  | -0.4014 | -0.526  | -0.5614 | -0.2383 | 0.6791  | 1.2271  |
| PVX_092880 | -0.1446 | -0.0961 | 0.1393  | 0.4088  | 0.5166  | 0.3623  | 0.2011  | -0.0301 | -0.0945 |
| PVX_092670 | -0.1509 | -0.451  | -0.7369 | -0.8429 | -0.8013 | -0.1001 | 0.494   | 0.2256  | 0.1598  |
| PVX_000880 | 0.7862  | 0.5905  | 0.5059  | 0.3171  | -0.038  | -0.8148 | -0.8103 | -0.2356 | 0.0777  |
| PVX_091805 | -0.6341 | -0.6833 | -0.4832 | -0.278  | -0.2767 | 1.0718  | 0.8973  | 0.2237  | -0.1594 |
| PVX_002865 | 0.0897  | -0.0419 | 0.0788  | 0.4552  | 0.6074  | 0.617   | 0.3322  | 0.3963  | 0.1603  |
| PVX_005570 | 1.7549  | 0.4789  | 0.2365  | -0.133  | 0.1198  | 0.0159  | -0.3402 | -0.5243 | -0.2627 |
| PVX_092525 | -0.0434 | 0.1544  | 0.025   | -0.4463 | 0.0153  | -0.0626 | 0.0991  | 0.1699  | 0.3043  |
| PVX_124020 | 0.5833  | 0.6534  | 0.6081  | 0.275   | 0.1599  | -0.2575 | 0.4914  | 0.8422  | 0.2374  |
| PVX_002975 | -0.4795 | 0.6255  | 0.874   | 0.8786  | 0.5161  | -0.2514 | -0.3012 | -0.3771 | -0.3726 |
| PVX_113575 | -0.2107 | 0.2331  | 0.3083  | 0.3653  | 0.2805  | 0.194   | -0.1778 | 0.1991  | 0.0629  |
| PVX_122980 | -0.6265 | -0.2554 | 0.3766  | 0.5739  | 0.6102  | 0.1887  | -0.4945 | -0.5851 | -0.2543 |
| PVX_088185 | 0.5761  | 0.8868  | 0.7451  | 0.3782  | -0.1209 | -0.3788 | -0.0706 | 0.1767  | 0.1711  |
| PVX_098955 | -0.1865 | 0.3491  | 0.4828  | 0.3651  | -0.0132 | -0.0235 | 0.0085  | -0.0898 | -0.1613 |
| PVX_091525 | -0.0142 | -0.5167 | -0.2527 | 0.1039  | 0.5247  | 0.6702  | 0.4435  | 0.1761  | 0.1034  |
| PVX_081850 | 0.4529  | 0.3768  | 0.2891  | 0.3063  | 0.0687  | -0.343  | -0.3064 | -0.1742 | -0.2563 |
| PVX_001800 | -0.1594 | 0.1565  | 0.5805  | 0.7148  | 0.7759  | 0.4561  | 0.115   | -0.2633 | -0.3548 |
| PVX_094310 | 0.7713  | -0.1603 | -0.0671 | 0.2001  | -0.0566 | -0.2072 | 0.026   | 0.0829  | 0.8121  |
| PVX_005580 | -0.1577 | -0.2663 | -0.2048 | -0.0571 | -0.0622 | 0.2039  | 0.614   | 0.0955  | -0.0975 |
| PVX_083355 | 0.3883  | 0.7696  | 0.5666  | 0.4319  | 0.1736  | -0.0288 | 0.2408  | 0.1824  | -0.3318 |
| PVX_100705 | -0.3982 | -0.7635 | -1.0749 | -0.437  | 0.25    | 1.0098  | 0.4539  | 0.1056  | 0.2083  |
| PVX_080415 | 0.6148  | 0.4924  | 0.6792  | 0.5883  | 0.2112  | 0.3695  | 0.0133  | 0.229   | 0.2129  |
| PVX_091555 | -1.093  | -1.1464 | -0.9303 | -0.3324 | 0.2524  | 0.5137  | 0.4386  | -0.1139 | -0.9475 |
| PVX_116820 | -0.0495 | -0.0117 | -0.3577 | -0.2816 | -0.2579 | 0.3916  | 0.0274  | -0.3593 | -0.296  |
| PVX_111455 | 0.1559  | -0.0137 | 0.1447  | 0.2232  | 0.4232  | -0.1542 | -0.0703 | 0.2221  | 0.5354  |
| PVX_099830 | 0.3743  | -0.2896 | -0.4886 | -0.2268 | 0.3263  | 0.9559  | 0.4743  | 0.2434  | 0.4618  |
| PVX_114510 | -0.4877 | -0.6023 | -0.9014 | -1.2138 | -1.3457 | -1.2439 | 0.7854  | 1.1466  | 0.6691  |
| PVX_085410 | -0.3054 | 0.5602  | 0.6658  | 0.4588  | 0.3058  | -0.1629 | -0.6249 | -0.6092 | -0.2305 |
| PVX_083095 | -0.5313 | -0.1402 | 0.3288  | 0.6499  | 0.3393  | 0.0091  | -0.1566 | -0.2266 | -0.4785 |
| PVX_097680 | 0.2331  | -0.1603 | -0.3619 | -0.7435 | -0.6173 | -0.3659 | -0.2943 | 0.1359  | 0.5451  |



|            |         |         |         |         |         |         |         |         |         |
|------------|---------|---------|---------|---------|---------|---------|---------|---------|---------|
| PVX_115375 | -0.2498 | -0.1473 | -0.188  | -0.2022 | 0.1622  | 0.0085  | 0.346   | 0.166   | 0.2779  |
| PVX_119515 | 0.2832  | -0.3321 | -0.2593 | -0.1983 | -0.2131 | -0.5831 | -0.2393 | 0.1779  | 0.2703  |
| PVX_117885 | 0.7905  | 0.4403  | 0.2681  | 0.3752  | 0.311   | 0.0027  | -0.0377 | 0.1098  | 0.2393  |
| PVX_092600 | 0.1361  | 0.3492  | 0.1918  | 0.0576  | 0.166   | 0.5782  | 0.2529  | -0.4041 | -0.4979 |
| PVX_002945 | -0.5534 | -0.1016 | 0.2773  | 0.2829  | 0.278   | 0.2696  | -0.2109 | -0.1781 | -0.135  |
| PVX_114155 | 0.0972  | 0.2823  | 0.1579  | -0.0556 | 0.213   | 0.4808  | 0.4023  | 0.2642  | 0.1149  |
| PVX_083525 | 0.9496  | 0.2895  | 0.0975  | 0.0468  | -0.6153 | -0.1588 | 0.1031  | 0.513   | 1.3462  |
| PVX_099225 | -0.1972 | 0.0975  | 0.2434  | 0.3227  | 0.19    | -0.0669 | -0.5944 | 0.0651  | 0.2481  |
| PVX_092130 | -0.1327 | 0.1747  | 0.387   | 0.3874  | 0.5281  | 0.3067  | -0.1166 | -0.3263 | -0.3336 |
| PVX_117575 | 0.1659  | -0.5958 | -0.6731 | -1.3835 | -0.6774 | -0.6127 | 0.4366  | 0.6042  | 0.9028  |
| PVX_003560 | 0.5278  | 0.4017  | -0.0125 | -0.2621 | -0.5405 | -0.7091 | -0.5246 | -0.1138 | 0.2821  |
| PVX_116500 | -0.8117 | -0.5446 | -0.1917 | 0.4817  | 0.2372  | 0.2981  | -0.3385 | -0.1218 | 0.0784  |
| PVX_081790 | 0.6421  | -0.0416 | -0.4207 | -1.0155 | -0.8945 | -0.2155 | 0.4042  | 1.0486  | 1.4231  |
| PVX_110810 | 0.7055  | -0.0221 | -0.2945 | -0.2727 | -0.0279 | 0.1119  | 0.5039  | 0.787   | 0.6482  |
| PVX_002820 | 0.2018  | -0.0075 | 0.0252  | -0.0152 | 0.2179  | -0.2072 | -0.168  | -0.1218 | -0.282  |
| PVX_123680 | -0.0807 | 0.3041  | 0.3712  | 0.4648  | 0.2766  | 0.4151  | 0.3254  | 0.069   | 0.043   |
| PVX_000920 | -0.0905 | 0.1751  | 0.2841  | 0.0684  | 0.3163  | 0.3668  | 0.2586  | 0.5994  | 0.4065  |
| PVX_117295 | 0.2657  | -0.5782 | -0.6329 | -0.1882 | -0.0195 | -0.0058 | -0.2596 | 0.1205  | 0.5336  |
| PVX_116955 | 0.3499  | 0.2945  | 0.0645  | -0.1554 | -0.0366 | 0.1221  | 0.165   | -0.0388 | 0.2411  |
| PVX_094530 | 0.9154  | 0.5202  | 0.3364  | 0.2346  | 0.0534  | -0.3176 | -0.5457 | -0.1241 | 0.2806  |
| PVX_090335 | 0.2276  | -0.0345 | -0.3735 | 0.0137  | 0.5576  | 0.077   | -0.0208 | -0.0219 | 0.6253  |
| PVX_123530 | 0.3129  | 0.3957  | -0.0928 | -0.4384 | -0.3388 | -0.5542 | -0.6338 | -0.1388 | 0.4357  |
| PVX_000545 | -0.5117 | 0.2949  | 0.3292  | 0.258   | 0.4534  | 0.8068  | -0.2338 | -1.0556 | -1.1354 |
| PVX_101030 | 0.3511  | 0.5039  | 0.4414  | 0.3944  | 0.1676  | 0.4171  | 0.3407  | 0.0333  | -0.3182 |
| PVX_113300 | 0.7686  | 0.598   | 0.3504  | 0.4921  | 0.2855  | -0.1944 | 0.232   | 0.7305  | 1.091   |
| PVX_119830 | -0.2258 | -0.177  | -0.3028 | -0.3279 | -0.1772 | 0.4864  | 0.4472  | 0.2522  | -0.0355 |
| PVX_058190 | 0.9812  | 0.7784  | 0.3754  | 0.8643  | 0.496   | 0.0499  | 0       | 0.0517  | 0.1412  |
| PVX_098850 | 0.6991  | 0.2085  | -0.0736 | -0.0967 | 0.312   | 0.7072  | 0.6267  | 0.3085  | 0.0267  |
| PVX_122955 | -0.0451 | 0.0326  | -0.0495 | -0.1766 | -0.0218 | 0.3184  | 0.2332  | 0.0026  | 0.2141  |
| PVX_099285 | -1.6336 | -1.4067 | -1.6059 | -1.5752 | -1.6022 | 0.1469  | 1.3147  | 1.0143  | -0.0899 |
| PVX_119460 | 0.0093  | 0.1972  | 0.2342  | 0.3967  | 0.7782  | 0.4461  | -0.1453 | -0.3242 | -0.3416 |
| PVX_098930 | 0.1656  | 0.4331  | 0.4871  | 0.5284  | 0.6322  | 0.3875  | -0.3078 | -0.9277 | -0.9763 |
| PVX_097955 | 0.1342  | 0       | -0.1584 | -0.1085 | -0.0351 | -0.2825 | -0.2975 | -0.1174 | -0.4005 |
| PVX_099820 | 0.0806  | -0.2541 | -0.1588 | -0.0347 | 0.3587  | 1.1137  | 0.7994  | 0.6285  | 0.5247  |
| PVX_110850 | -1.0092 | -0.3587 | -0.1867 | 0.0048  | 0.2533  | 0.4016  | 0.1328  | -0.3041 | -0.408  |
| PVX_099230 | 0.1431  | -0.3771 | -0.7185 | -0.9046 | -0.705  | -0.5574 | 0.8907  | 0.8832  | 0.535   |
| PVX_009600 | 0.0439  | 0.2704  | 0.5034  | 0.0835  | 0.5036  | 0.0092  | 0.2913  | 0.2021  | 0.4837  |
| PVX_123745 | -0.1673 | -0.0822 | 0.2282  | 0.2415  | -0.0278 | 0.7238  | 0.1573  | -0.2635 | -0.2767 |
| PVX_087695 | -0.2601 | -0.086  | -0.3761 | -0.6017 | -0.5503 | -0.1996 | -0.2946 | -0.4208 | -0.1687 |
| PVX_118280 | -0.2476 | 0.3555  | 0.3587  | 0.1967  | -0.2392 | -0.8904 | 0.058   | 0.3856  | -0.1592 |
| PVX_117850 | -0.9928 | -0.4285 | 0.0238  | 0.2604  | 0.4475  | 0.5746  | 0.2223  | -0.297  | -0.5759 |
| PVX_111160 | 0.1074  | -0.1037 | -0.3554 | -0.4102 | -0.2809 | 0.2485  | 0.7276  | 0.5251  | 0.4557  |
| PVX_114850 | 0.0255  | -0.1171 | -0.0506 | 0.1289  | -0.0116 | 0.5769  | 0.3644  | -0.1332 | 0.2921  |
| PVX_082920 | 0.798   | 0.3596  | 0.1869  | 0.0025  | 0.017   | -0.0799 | -0.1584 | 0.017   | 0.2683  |
| PVX_123750 | -0.8007 | -0.1153 | 0.0176  | 0.0589  | 0.3777  | 0.6361  | 0.4654  | 0.2283  | 0.131   |
| PVX_084865 | -0.3941 | -0.3227 | -0.1782 | 0.0907  | 0.1225  | 0.3062  | 0.475   | 0.2847  | -0.207  |
| PVX_098625 | -0.9284 | -1.0794 | -1.3385 | -2.0136 | -1.7878 | 0.2594  | 1.259   | 1.0554  | 0.6318  |
| PVX_084790 | -0.1936 | -0.1578 | -0.381  | -0.257  | -0.2099 | -0.0925 | -0.1299 | 0.2868  | 0.3088  |
| PVX_091845 | 0.9645  | 1.0241  | 0.6321  | 0.5059  | 0.37    | 0.0252  | 0.4905  | 0.4289  | 0.1366  |
| PVX_123115 | -0.6063 | -0.0777 | 0.0041  | 0.089   | -0.1613 | 0.2271  | 0.287   | -0.0374 | -0.192  |
| PVX_115400 | 0.4165  | 0.1654  | 0.2709  | 0.2817  | 0.3576  | -0.0429 | -0.3492 | -0.2256 | -0.0058 |
| PVX_113565 | -0.9521 | -0.79   | 0.0698  | 0.5745  | 0.6326  | 0.0341  | -0.4011 | -0.2495 | -0.0695 |
| PVX_089650 | -0.3391 | 0.4304  | 0.9318  | 1.0426  | 0.6132  | 0.08    | -0.1379 | -0.6763 | -0.3956 |
| PVX_092270 | -0.5655 | -0.8413 | -0.8512 | -1.0294 | -0.8413 | 0.649   | 0.8164  | 0.2489  | -0.156  |
| PVX_115180 | 0.5726  | 0.3602  | 0.412   | 0.4077  | 0.2611  | -0.2535 | -0.5452 | -0.2057 | -0.2431 |
| PVX_084440 | 0.7164  | 0.5321  | 0.4813  | 0.3971  | 0.005   | 0.0223  | -0.411  | -0.4071 | -0.2463 |
| PVX_087140 | -0.4169 | -0.4008 | -0.1375 | -0.012  | -0.0283 | 0.3291  | 0.8179  | 0.6696  | -0.001  |
| PVX_094465 | -0.6452 | -0.5137 | -0.1755 | 0.168   | 0.6543  | 0.7813  | 0.3271  | 0.0255  | -0.2957 |
| PVX_099280 | 0.4781  | 0.1675  | 0       | -0.0508 | 0.2634  | 0.5136  | 0.352   | 0.2341  | 0.3918  |
| PVX_099880 | 0.8192  | 0.8643  | 0.6288  | 0.1415  | -0.4397 | -0.4612 | -0.4047 | -0.4712 | -0.1721 |
| PVX_124010 | -0.7212 | -1.043  | -1.0217 | -0.6505 | -0.0551 | 0.5918  | 1.4488  | 1.2431  | 0.3491  |
| PVX_123605 | 1.1     | 0.7481  | 0.136   | -0.5665 | -0.9221 | -0.6726 | 0.2662  | 1.0128  | 1.7491  |
| PVX_092700 | 0.6611  | 0.6003  | 0.1349  | -0.5584 | -0.9418 | -0.9307 | -0.5422 | 0.5306  | 1.4938  |

|            |         |         |         |         |         |         |         |         |         |
|------------|---------|---------|---------|---------|---------|---------|---------|---------|---------|
| PVX_080060 | 0.2217  | 0.1128  | -0.0724 | 0.3641  | 0.1641  | -0.3315 | -1.1319 | -1.1283 | -0.7324 |
| PVX_115300 | 0.9182  | 0.7058  | 0.3382  | -0.0424 | -0.4728 | -0.6118 | -0.7561 | -0.0158 | -0.0823 |
| PVX_081250 | 0.8405  | -0.3648 | -0.9573 | -1.0938 | -0.3331 | 0.11    | 0.3795  | 0.5593  | 1.1608  |
| PVX_087860 | 0.1822  | 0.3406  | 0.4598  | 0.5161  | 0.1205  | 0.2249  | -0.3101 | -1.4006 | -1.2837 |
| PVX_100620 | 0.6999  | 0.501   | 0.5861  | 0.4231  | 0.1124  | 0.1348  | 0.5166  | -0.0013 | -0.218  |
| PVX_082395 | 0.5493  | 0.401   | 0.5089  | 0.4448  | 0.4382  | 0.3588  | 0.0186  | -0.5549 | -0.5965 |
| PVX_087920 | 0.4873  | 0.1678  | 0.4212  | 0.3361  | 0.654   | 0.6175  | 0.5612  | -0.1967 | -0.3476 |
| PVX_001675 | -0.1272 | -0.5357 | -0.5294 | -0.6219 | -0.77   | -0.8315 | -0.0646 | 1.2626  | 1.1513  |
| PVX_114350 | 0.9218  | -0.2005 | -0.3288 | -0.4382 | -0.396  | -0.3365 | -0.2273 | 0.5968  | 1.3412  |
| PVX_099545 | 0.1671  | 0.2251  | 0.2129  | 0.2251  | -0.0581 | 0.2308  | 0.6055  | -0.208  | -0.203  |
| PVX_101045 | 0.5065  | 0.9007  | 0.9495  | 0.8164  | 0.6928  | -0.0385 | -0.5233 | -0.6473 | -0.4262 |
| PVX_099665 | 1.1821  | 0.2484  | -0.3683 | -0.7078 | -0.6324 | -0.5702 | 0.166   | 1.1589  | 1.4655  |
| PVX_117405 | 0.0853  | 0.0467  | 0.0982  | 0.2284  | 0.2125  | -0.0896 | -0.0995 | 0.2223  | 0.5129  |
| PVX_119335 | 1.2431  | 0.8926  | 0.4313  | 0.2257  | -0.0382 | 0.2572  | 0.1431  | -0.1501 | 0.0818  |
| PVX_091490 | 0.1088  | 0.0456  | 0.2696  | 0.3856  | 0.4019  | 0.3694  | 0.553   | 0.4544  | 0.3504  |
| PVX_075195 | -0.6284 | -0.6959 | -0.6603 | -0.4495 | -0.5929 | -0.2304 | 0.2622  | -0.0861 | -0.2869 |
| PVX_114555 | -0.832  | 0.0436  | 0.5511  | 0.9062  | 0.4248  | -0.5266 | -1.0902 | -0.8037 | -0.6198 |
| PVX_115395 | -0.4912 | 0.4604  | 1.1174  | 1.4204  | 0.9693  | 0.0485  | -0.435  | -0.4341 | -0.2429 |
| PVX_089125 | 0.1949  | -0.0353 | -0.1254 | 0.1556  | 0.3324  | 0.8093  | 0.5282  | 0.1545  | 0.0686  |
| PVX_118455 | -0.0264 | 0.1774  | 0.0644  | 0.2183  | 1.3767  | 0.222   | -0.813  | -0.9128 | -1.0994 |
| PVX_092450 | -1.1765 | -0.848  | -1.2273 | -1.2448 | -0.4952 | 0.0657  | 1.2246  | 0.946   | 0.2239  |
| PVX_101020 | 0.4681  | 0.213   | 0.0443  | 0.0309  | -0.1586 | -0.0993 | -0.0068 | 0.3723  | 0.7447  |
| PVX_096340 | 0.2365  | 0.5395  | 0.7125  | 0.6172  | 0.4738  | 0.5099  | -0.5941 | -1.2419 | -1.1777 |
| PVX_100740 | 0.2562  | -0.0191 | -0.1263 | -0.0921 | -0.0769 | -0.2437 | 0.1038  | 0.3711  | 0.3568  |
| PVX_113255 | 0.872   | 0.8459  | 0.3737  | 0.1206  | -0.2744 | -0.5673 | -0.5466 | -0.2077 | 0.1738  |
| PVX_089590 | -0.5689 | -0.9842 | -0.9393 | -0.3529 | 0.356   | 0.8072  | 0.4204  | 0.1561  | 0.0822  |
| PVX_097940 | 0.6761  | 0.975   | 0.7867  | 0.884   | 0.7073  | 0.4637  | 0.0354  | -0.1127 | -0.0397 |
| PVX_080580 | 0.2495  | 0.4337  | 0.4068  | 0.3618  | 0.5666  | 0.0265  | -0.3654 | -0.5548 | -0.693  |
| PVX_081695 | -1.3119 | -0.4992 | 0.0474  | 0.2935  | 0.8088  | 0.7188  | -0.009  | -0.5611 | -0.8676 |
| PVX_088905 | 0.0034  | 0.4345  | 0.53    | 0.614   | 0.6657  | 0.5107  | 0.0451  | -0.4105 | -0.4706 |
| PVX_080225 | -0.5101 | -0.9067 | -0.4378 | 0.0816  | 0.4846  | 0.3017  | -0.3804 | -0.6986 | -0.5788 |
| PVX_117210 | 0.3294  | 0.3403  | 0.2856  | 0.2756  | 0.2323  | 0.2478  | 0.2616  | 0.4211  | 0.402   |
| PVX_101145 | -0.466  | -0.4777 | -0.5209 | -0.2941 | -0.4181 | -0.6219 | -1.2429 | -0.9395 | -0.9929 |
| PVX_011110 | 0.1632  | -0.1408 | -0.0263 | -0.2167 | 0.0294  | 0.1736  | -0.1561 | 0.1653  | 0.1949  |
| PVX_091785 | -0.0911 | 0.2085  | 0.2797  | 0.3831  | 0.2213  | 0.7566  | 0.0736  | -0.4142 | -0.9609 |
| PVX_095070 | 0.2321  | 0.2837  | 0.336   | 0.294   | 0.2112  | 0.2632  | 0.2968  | 0.2543  | -0.1019 |
| PVX_016140 | 0.0066  | 0.3161  | -0.0961 | 0.047   | -0.2029 | 0.0685  | -0.054  | 0.0475  | -0.2184 |
| PVX_099015 | 0.3916  | -0.0258 | -0.134  | -0.5624 | -0.6011 | -0.5276 | -0.4301 | 0.2837  | 1.2235  |
| PVX_079720 | -0.8729 | -0.9111 | -0.9658 | -1.185  | -1.2966 | -0.41   | 1.1327  | 1.1359  | 0.554   |
| PVX_098630 | 0.0173  | -0.6221 | -0.9183 | -0.5102 | -0.0789 | 0.6077  | 0.7145  | 0.4062  | 0.5794  |
| PVX_085680 | -0.463  | -0.4551 | -0.3379 | -0.0396 | 0.2992  | 0.4783  | 0.1928  | -0.3232 | -0.2039 |
| PVX_094855 | 0.7821  | 0.422   | 0.4241  | 0.3714  | 0.2223  | 0.2027  | -0.066  | -0.4598 | -0.2603 |
| PVX_116650 | 0.5515  | 0.2869  | 0.2481  | 0.1559  | 0.2732  | 0.4652  | 0.3472  | 0.277   | 0.4677  |
| PVX_115315 | 0.9027  | 0.6836  | 0.5917  | 0.5805  | 0.3016  | 0.1061  | 0.5366  | 0.1531  | -0.3854 |
| PVX_088140 | -0.0643 | 0.2664  | 0.612   | 0.8185  | 1.0937  | 0.0667  | -0.23   | 0.0049  | 0.3986  |
| PVX_094675 | 0.0387  | 0.3161  | 0.4766  | 0.4717  | 0.1705  | -0.3008 | -0.6364 | -0.558  | -0.4724 |
| PVX_086960 | -0.7667 | 0.0891  | 0.345   | 0.3121  | 0.3122  | 0.0606  | -0.1419 | -0.3519 | -0.4226 |
| PVX_095335 | 0.0988  | 0.4343  | 0.6658  | 0.6513  | 0.639   | -0.0366 | -0.0803 | -0.1133 | 0.0043  |
| PVX_113800 | 0.0505  | -0.1118 | -0.2415 | 0.0057  | 0.0743  | -0.2226 | 0.8827  | 1.0543  | 0.5334  |
| PVX_119205 | -0.8292 | -1.1945 | -1.4389 | -1.5431 | -1.3975 | -1.604  | -1.6462 | -0.133  | 0.2592  |
| PVX_091640 | -0.3538 | 0.4692  | 0.6409  | 0.4877  | 0.1242  | -0.8607 | -1.21   | -1.1105 | -1.0788 |
| PVX_079850 | -1.1389 | -0.3071 | -0.2277 | -0.1838 | 0.0439  | 0.2834  | -0.1529 | -0.7106 | -0.8795 |
| PVX_086190 | 0.573   | 0.4671  | 0.1912  | 0.0431  | 0.1189  | 0.6184  | 0.5014  | -0.384  | -0.3061 |
| PVX_101125 | -0.8922 | -0.5275 | -0.5052 | -0.517  | -0.1145 | 0.3944  | 0.2411  | 0.6437  | 0.5586  |
| PVX_092975 | -0.0981 | -0.4544 | -0.5785 | -0.5521 | -0.2462 | 0.8624  | 1.5572  | 0.1638  | 0.3218  |
| PVX_086265 | 0.4003  | -0.2456 | -0.5087 | -0.5217 | -0.3004 | -0.1179 | 0.2107  | 0.4249  | 0.7989  |
| PVX_111275 | -0.4734 | -0.9514 | -0.7459 | -0.5065 | -0.1038 | 0.6319  | 0.6526  | -0.1699 | -0.0892 |
| PVX_114775 | 0.3113  | 0.4992  | 0.7354  | 0.6839  | 0.5697  | 0.8282  | 0.3381  | -0.0642 | -0.1986 |
| PVX_097590 | -1.2793 | -1.2242 | -1.4517 | -1.4807 | -1.5011 | -1.4985 | 1.0906  | 1.4704  | 0.4035  |
| PVX_122965 | -0.0139 | -0.2463 | -0.5566 | -1.0852 | -1.0692 | -0.7481 | 0.1869  | 0.4797  | 0.9877  |
| PVX_084515 | -0.5076 | -0.1005 | 0.1316  | 0.1622  | 0.183   | 0.4002  | -0.1479 | -0.3982 | -0.6749 |
| PVX_087710 | 0.0527  | 0.0236  | 0.3563  | 0.3733  | 0.4868  | 0.1059  | -0.1593 | -0.0207 | 0.1253  |
| PVX_092980 | 0.0975  | 0.0201  | -0.1731 | -0.173  | -0.2898 | 0.096   | 0.5566  | -0.06   | -0.1781 |

|            |         |         |         |         |         |         |         |         |         |
|------------|---------|---------|---------|---------|---------|---------|---------|---------|---------|
| PVX_001935 | 0.5899  | 0.3968  | 0.1601  | 0.0174  | 0.2786  | 0.0766  | 0.1617  | 0.2978  | 0.3588  |
| PVX_111050 | 0.1765  | 0.0124  | 0.3145  | 0.4085  | 0.3465  | 0.1616  | 0.1554  | 0.294   | 0.1339  |
| PVX_088265 | -1.6443 | -1.4049 | -1.9538 | -1.8918 | -0.6857 | 1.2901  | 1.5058  | 0.2279  | -0.2603 |
| PVX_091105 | -1.0469 | -0.5393 | 0.1282  | 0.4825  | 0.648   | 1.0717  | 0.2595  | -1.2794 | -1.483  |
| PVX_118630 | -0.6661 | 0.2895  | 0.555   | 0.4553  | 0.446   | 0.2856  | -0.6548 | -0.4779 | -0.5733 |
| PVX_088070 | 0.2722  | 0.0366  | 0.1514  | 0.3451  | 0.3211  | 0.0588  | -0.4106 | -0.5343 | -0.4578 |
| PVX_115005 | 1.108   | 0.7357  | 0.607   | 0.421   | 0.162   | -0.3972 | -0.4594 | -0.6174 | -0.6768 |
| PVX_092000 | 0.0616  | -0.0434 | 0.0456  | -0.1574 | 0.5195  | 0.9352  | 0.3048  | -0.3774 | -0.513  |
| PVX_079730 | 0.8153  | 0.6668  | 0.5795  | 0.3726  | 0.2681  | -0.3027 | -0.2789 | -0.0049 | 0.2855  |
| PVX_123050 | -0.4094 | -0.8073 | -0.7677 | 0.1225  | 0.393   | -0.0258 | -0.0305 | -0.1525 | -0.1011 |
| PVX_087065 | -0.4794 | 0.0338  | 0.1136  | 0.0882  | 0.3419  | 0.4625  | 0.0026  | -0.5498 | -0.7492 |
| PVX_086235 | -0.749  | 0.0344  | 0.3503  | 0.5708  | 0.7037  | 0.1011  | -0.5668 | -0.7926 | -0.6576 |
| PVX_099815 | 0.3722  | -0.1575 | -0.3384 | -0.537  | 0.1671  | 0.1618  | 0.7689  | 0.8783  | 0.7098  |
| PVX_081675 | -0.873  | -0.0498 | 0.1491  | 0.4397  | 0.3999  | 0.7158  | -0.5602 | -1.2211 | -1.4886 |
| PVX_092665 | -0.1962 | -0.1997 | -0.3363 | -0.5468 | -0.5604 | -0.211  | 0.0643  | -0.2117 | -0.3277 |
| PVX_091365 | -0.2266 | 0.5312  | 0.5138  | 0.8166  | 0.5695  | 0.2626  | 0.1667  | -0.0791 | -0.1275 |
| PVX_090085 | 0.2341  | 0.0316  | -0.1587 | -0.2371 | -0.1903 | -0.0906 | 0.4647  | 0.4383  | 0.1717  |
| PVX_091110 | 0.277   | 0.1263  | 0.1547  | 0.3107  | 0.0786  | 0.5404  | 0.2973  | -0.3656 | -0.5818 |
| PVX_122725 | -0.8202 | -0.3475 | 0.0936  | 0.4867  | 0.8009  | 0.8614  | -0.0142 | -0.3336 | -0.2642 |
| PVX_089055 | 0.476   | 0.1448  | 0.2933  | 0.3109  | 0.3954  | 0.0309  | 0.0755  | -0.0923 | -0.4684 |
| PVX_084950 | -0.0172 | -0.3877 | -0.5021 | -0.3242 | -0.2282 | -0.4296 | 0.8816  | 0.6013  | 0.2115  |
| PVX_087040 | 0.8595  | 0.3138  | 0.292   | 0.5244  | 0.4471  | 0.5032  | 0.3622  | 0.1897  | 0.1055  |
| PVX_123435 | 0.1017  | 0.2444  | 0.1793  | 0.335   | 0.3439  | 0.2266  | -0.3447 | -0.4106 | -0.286  |
| PVX_100555 | -0.2348 | -0.7323 | -0.6766 | -0.2055 | 0.5015  | 0.8572  | 0.4619  | 0.0463  | -0.1943 |
| PVX_000775 | 0.3122  | 0.4495  | 0.4011  | 0.4222  | 0.2259  | 0.3043  | 0.1594  | -0.4468 | -0.3218 |
| PVX_114235 | -1.0411 | -0.3675 | 0.0792  | 0.319   | 0.3893  | 0.2828  | 0.0464  | -0.2617 | -0.6384 |
| PVX_089405 | 0.6431  | 0.5841  | 0.3374  | 0.1532  | -0.0044 | -0.012  | 0.2425  | 0.4162  | 0.7087  |
| PVX_106720 | 0.182   | -0.0246 | -0.0836 | -0.4091 | -0.5356 | 0.1759  | 0.0509  | -0.1339 | 0.0427  |
| PVX_079695 | 0.2096  | -0.0961 | 0.1546  | 0.4009  | -0.1839 | -0.6092 | -0.0484 | 0.3321  | 0.0894  |
| PVX_080085 | -0.5743 | -0.9832 | -0.8087 | -0.2726 | 0.4225  | 0.8998  | 0.4816  | 0.4219  | 0.3808  |
| PVX_123345 | -0.0792 | -0.2637 | -0.2255 | -0.0649 | 0.0548  | -0.0647 | -0.166  | -0.0341 | 0.3137  |
| PVX_094470 | 0.638   | 0.5866  | 0.5814  | 0.3773  | 0.3013  | 0.2674  | -0.0077 | -0.2409 | -0.2222 |
| PVX_113600 | 0.8644  | 0.6236  | 0.4697  | 0.5678  | 0.376   | -0.4028 | -1.0236 | -1.6083 | -1.1823 |
| PVX_083255 | 0.0777  | -0.5488 | -0.4681 | 0.5009  | 0.754   | 1.1551  | 0.7771  | 0.389   | 0.5131  |
| PVX_100850 | 0.8047  | 0.2247  | -0.263  | -0.9375 | -0.926  | -0.5698 | 0.1867  | 0.8949  | 1.3366  |
| PVX_111025 | -0.6667 | 0.5261  | -0.1367 | -0.3607 | -0.6191 | -0.3389 | 0.1364  | 1.0715  | 0.8913  |
| PVX_002530 | 1.0545  | 0.4366  | 0.0218  | -0.6648 | -1.1137 | -1.2722 | -1.0605 | -0.0415 | 0.3064  |
| PVX_088970 | 0.3122  | 0.1921  | 0.1165  | 0.1585  | 0.1879  | -0.0342 | 0.339   | 0.6007  | 0.593   |
| PVX_122975 | -0.0898 | -0.1805 | 0.0948  | 0.1847  | -0.1531 | 0.0181  | 0.3899  | 0.4277  | 0.8346  |
| PVX_123965 | 0.6891  | 0.6439  | 0.5432  | 0.5578  | 0.4286  | 0.0844  | -0.0398 | -0.2971 | -0.2798 |
| PVX_000770 | 0.4613  | 0.3235  | 0.5307  | 0.5081  | 0.6029  | -0.0981 | -0.3592 | -0.6469 | -0.5953 |
| PVX_123070 | 0.1659  | 0.1592  | 0.3788  | 0.4928  | 0.3321  | 0.1946  | -0.4488 | -1.4955 | -1.4357 |
| PVX_091340 | 0.5448  | 0.0497  | -0.164  | -0.2098 | 0.1997  | -0.0861 | -0.0288 | 0.5403  | 0.9655  |
| PVX_081755 | -0.0024 | -0.4562 | -0.6686 | -0.6998 | -0.2113 | 0.445   | 0.4424  | 0.1606  | 0.295   |
| PVX_079775 | -0.9214 | -0.18   | 0.5135  | 0.7424  | 0.4379  | -0.653  | -0.76   | -0.8067 | -0.5109 |
| PVX_100795 | -0.2622 | -0.5128 | -0.7706 | -0.8924 | -1.0419 | -1.3233 | 0.9774  | 0.872   | 0.4066  |
| PVX_118655 | 0.1368  | -0.0638 | -0.1863 | -0.3722 | -0.5706 | 0.4311  | 0.5929  | 0.2134  | -0.2301 |
| PVX_114360 | 0.9078  | 0.2551  | -0.0724 | -0.1972 | -0.2437 | -0.1896 | -0.0738 | 0.3784  | 0.8255  |
| PVX_101100 | 0.0248  | 0.4394  | 0.5603  | 0.7116  | 0.6953  | 0.0898  | -0.0863 | -0.2521 | -0.1037 |
| PVX_118585 | -0.641  | -0.3795 | 0.0266  | 0.7428  | 1.0932  | 0.4411  | -0.2153 | -0.3545 | -0.4787 |
| PVX_081430 | -0.1322 | -0.2952 | -0.399  | -0.5178 | -0.4878 | -0.318  | 0.5291  | 0.391   | 0.236   |
| PVX_123240 | -0.0274 | -0.0619 | 0.0223  | 0.3709  | 0.2646  | -0.1083 | -1.0469 | -1.1918 | -0.9227 |
| PVX_124150 | -1.2849 | -1.1256 | -0.3068 | 0.3158  | 1.1464  | 1.2342  | 0.1176  | -0.4035 | -0.6435 |
| PVX_118680 | -0.2773 | 0.2495  | 0.1284  | -0.0076 | 0.0786  | 0.1799  | 0.2418  | 0.1659  | 0.2765  |
| PVX_001640 | -0.0333 | -0.2617 | -0.5972 | -0.5647 | 0.0102  | -0.6338 | -1.0072 | -0.6364 | -0.7928 |
| PVX_098745 | -0.1212 | 0.2102  | 0.2646  | 0.2411  | 0.0993  | 0.0691  | -0.0654 | -0.024  | -0.0133 |
| PVX_085185 | -0.1494 | 0.219   | 0.6037  | 0.696   | 0.6539  | 0.6043  | 0.3433  | 0.1184  | 0.0811  |
| PVX_081665 | 0.4977  | 0.8616  | 0.7464  | 0.7531  | 0.4292  | -0.0561 | -0.0045 | 0.4571  | 0.6163  |
| PVX_109795 | -0.1344 | -0.1514 | -0.205  | -0.2364 | -0.4761 | -0.4338 | -0.6217 | -0.3015 | -0.3952 |
| PVX_116525 | 0.6692  | 0.4535  | 0.2482  | -0.0966 | -0.1083 | -0.1343 | -0.0222 | 0.5766  | 1.2366  |
| PVX_097605 | -0.1185 | 0.1379  | 0.1671  | 0.138   | -0.0722 | -0.0563 | -0.5241 | -0.8165 | -0.8087 |
| PVX_113240 | -1.0494 | -1.2601 | -1.4815 | -1.6505 | -1.693  | -2.2428 | -1.8841 | 1.0101  | 1.0007  |
| PVX_083035 | 0.8675  | 0.3553  | 0.3968  | 0.5131  | 0.609   | -0.1931 | -0.4859 | -0.4641 | -0.1657 |

|            |         |         |         |         |         |         |         |         |         |
|------------|---------|---------|---------|---------|---------|---------|---------|---------|---------|
| PVX_083040 | 0.5729  | 0.3434  | 0.3371  | 0.2718  | 0.3735  | -0.0994 | -0.5007 | -0.392  | -0.074  |
| PVX_092500 | 0.7495  | -0.0703 | -0.3477 | -0.7238 | -1.0132 | -1.2116 | -0.1821 | 0.7473  | 1.634   |
| PVX_118350 | -0.0281 | -0.1644 | -0.1282 | 0.1351  | 0.2696  | 0.0669  | 0.1211  | 0.0483  | -0.0216 |
| PVX_104180 | -0.2154 | -0.1191 | 0.0642  | 0.1807  | 0.0752  | -0.4301 | -0.6352 | -0.3997 | -0.3231 |
| PVX_095055 | -0.8867 | -0.9079 | -0.8791 | -0.7481 | -0.8378 | -0.7231 | 0.7782  | 1.32    | 0.8147  |
| PVX_122275 | -0.0597 | 0.1563  | 0.4099  | 0.5139  | 0.2576  | 0.4907  | 0.1033  | -0.499  | -0.2342 |
| PVX_099425 | -1.1451 | -0.1641 | 0.2804  | 0.3979  | 0.5941  | 0.2567  | -0.1272 | -0.5498 | -0.2202 |
| PVX_089925 | -0.705  | -0.234  | 0.1369  | 0.3861  | 0.7293  | 0.5447  | 0.3926  | -0.3457 | -0.7181 |
| PVX_092550 | 0.1465  | -0.379  | -0.4586 | -0.4984 | -0.3457 | -0.097  | 0.3944  | 0.7045  | 0.4572  |
| PVX_091030 | 0.1317  | 0.3491  | 0.1709  | 0.2109  | -0.2629 | -0.0139 | 0.127   | -0.2314 | -0.6421 |
| PVX_117365 | 0.78    | 0.5584  | 0.3025  | -0.0472 | 0.076   | 0.3732  | 0.7488  | 0.7753  | 1.2479  |
| PVX_001035 | -0.1057 | -0.2292 | 0.2704  | 0.3898  | 0.3155  | -0.1964 | -0.1306 | -0.206  | -0.2492 |
| PVX_111260 | 0.4005  | 0.6551  | 0.7618  | 0.6071  | 0.5641  | 0.4172  | 0.0142  | -0.5179 | -0.4067 |
| PVX_117010 | -0.1096 | -0.0362 | 0.0158  | -0.0251 | -0.1974 | 0.3565  | 0.2655  | -0.1492 | -0.2996 |
| PVX_097785 | -0.4092 | 0.5267  | 0.6438  | 0.5026  | 0.532   | 0.5131  | -0.2467 | -0.4987 | -0.3746 |
| PVX_089010 | 0.4667  | 0.5304  | 0.5975  | 0.5971  | 0.6385  | 0.4627  | -0.0867 | -0.518  | -0.2226 |
| PVX_114855 | 0.3283  | 0.1979  | -0.0241 | 0.0592  | 0.3678  | 0.1919  | 0.0732  | 0.0804  | 0.3223  |
| PVX_081810 | -0.5393 | -0.1677 | 0.2707  | 0.3436  | -0.0934 | -0.6838 | -0.7112 | 0.885   | 0.8689  |
| PVX_116935 | 0.0131  | 0.0759  | 0.2321  | 0.3172  | 0.316   | 0.1546  | -0.0354 | -0.3054 | -0.3186 |
| PVX_092890 | -0.431  | -0.7095 | -0.7955 | -0.7804 | -0.1884 | 0.9538  | 0.6599  | 0.3034  | -0.0358 |
| PVX_113955 | -0.4208 | -0.2251 | -0.019  | -0.0803 | 0.2242  | 0.4033  | 0.0935  | -0.0996 | -0.3644 |
| PVX_095995 | -0.5947 | -0.0975 | -0.1627 | -0.1146 | -0.5161 | 0.1524  | 0.762   | 0.1193  | -0.4072 |
| PVX_092195 | -0.0803 | 0.2317  | 0.3847  | 0.4181  | 0.5078  | 0.3359  | -0.2441 | -0.3944 | -0.2575 |
| PVX_080025 | -0.9287 | 0.3044  | 0.3199  | 0.4492  | 0.3581  | -0.3794 | -0.0364 | 0.2825  | -0.564  |
| PVX_080655 | 0.0554  | 0.4482  | 0.6229  | 0.7211  | 0.7535  | 0.0403  | 0.117   | -0.1608 | -0.3288 |
| PVX_109280 | -0.3991 | -0.71   | -0.1961 | 0.2404  | 0.058   | -0.672  | -0.573  | 0.8611  | 0.9812  |
| PVX_123980 | 0.0508  | -0.4631 | -0.7913 | -0.7338 | -0.4864 | 0.2475  | 0.9699  | 0.7189  | 0.4097  |
| PVX_091215 | 0.651   | 0.5532  | 0.3563  | 0.0735  | -0.1347 | -0.161  | 0.0175  | 0.5875  | 0.4562  |
| PVX_101400 | 0.8463  | -0.0127 | -0.719  | -1.3158 | -1.7963 | -1.6021 | 0.3789  | 1.173   | 1.4059  |
| PVX_001645 | -1.3142 | -0.8123 | -1.1188 | -1.0342 | -0.4155 | -0.1255 | -0.7208 | -0.1677 | -0.4301 |
| PVX_003805 | -1.5749 | -1.7044 | -1.7889 | -1.7807 | -1.8022 | 0.143   | 1.5639  | 0.9947  | -0.162  |
| PVX_086965 | -0.4696 | -0.0595 | -0.0998 | 0.0384  | 0.1103  | 0.0806  | -0.4282 | -0.9944 | -1.6416 |
| PVX_100600 | -0.012  | 0.3251  | 0.5236  | 0.6386  | 0.3834  | 0.0839  | 0.402   | 0.1298  | 0.2199  |
| PVX_123410 | 0.5169  | 0.4001  | -0.0388 | -0.4903 | -0.5412 | -0.7412 | -0.4246 | 0.4178  | 1.2255  |
| PVX_082640 | 0.3988  | 0.7048  | 0.7198  | 0.7452  | 0.2818  | -1.0759 | -1.5014 | -1.3499 | -1.1586 |
| PVX_089640 | -1.1618 | -0.0188 | 0.3862  | 0.9335  | 0.3206  | 0.876   | 0.3744  | -0.2854 | -1.1242 |
| PVX_110844 | -0.5787 | -0.3221 | -0.4493 | -0.4131 | -0.4097 | 0.3419  | 0.6044  | 0.5372  | 0.4491  |
| PVX_084815 | -0.2239 | -0.538  | -0.7512 | -0.6389 | -0.6198 | -0.0548 | 1.2978  | 0.9489  | 0.2072  |
| PVX_088105 | 0.7675  | 0.3618  | 0.358   | 0.3307  | 0.2658  | -0.3335 | -0.6949 | -0.7213 | -0.4162 |
| PVX_114300 | 0.283   | 0.0897  | 0.2808  | 0.2904  | 0.0471  | -0.189  | 0.5247  | 0.2065  | 0.47    |
| PVX_118660 | 0.4389  | 0.1457  | -0.0797 | -0.2386 | -0.3778 | -0.0839 | 0.3533  | 0.5659  | 1.2137  |
| PVX_082740 | 0.6139  | 0.3017  | -0.0079 | 0.0702  | -0.1716 | 0.258   | 0.1208  | 0.0147  | 0.1976  |
| PVX_002550 | 0.4251  | 0.469   | 0.3575  | -0.188  | -1.4988 | -2.0691 | -0.9821 | 0.992   | 0.8045  |
| PVX_003715 | 0.6124  | -0.3496 | -0.687  | -0.1468 | 0.2434  | 0.0537  | 0.2236  | 0.5359  | 0.8053  |
| PVX_110965 | -0.1826 | 0.382   | 0.8252  | 0.7823  | 0.5082  | -0.688  | -0.7826 | -0.5204 | -0.3227 |
| PVX_113525 | -0.1212 | 0.0602  | 0.0993  | 0.1711  | 0.5556  | 0.3677  | -0.0069 | 0.0333  | 0.2926  |
| PVX_094865 | 0.6985  | 0.5873  | 0.3462  | 0.407   | -0.0709 | -0.0316 | 0.1711  | -0.1081 | -0.2123 |
| PVX_122030 | -0.2432 | -0.6353 | -0.7308 | -0.6448 | 0.2299  | 0.7483  | 0.8593  | 0.3533  | 0.0894  |
| PVX_000740 | 0.3356  | -0.0715 | -0.0021 | 0.2924  | 0.1985  | 0.3359  | 0.4067  | 0.3498  | 0.1072  |
| PVX_089545 | -0.2759 | -0.3739 | -0.3275 | -0.5688 | -0.4977 | 0.9708  | 1.029   | 1.0584  | 0.7412  |
| PVX_114030 | 0.6323  | 0.4038  | 0.5748  | 0.7932  | 0.6803  | 0.273   | 0.423   | 0.4064  | -0.0104 |
| PVX_082560 | -0.5732 | -0.2547 | 0.0889  | 0.0143  | 0.1001  | -0.0115 | -0.332  | -0.7522 | -0.7925 |
| PVX_123180 | 0.172   | -0.0504 | 0.2768  | 0.3831  | 0.2643  | 0.3561  | 0.1246  | 0.2751  | 0.4428  |
| PVX_084550 | -0.1021 | 0.1225  | 0.278   | 0.5741  | 0.375   | -0.1033 | -0.0771 | 0.1336  | 0.1986  |
| PVX_091140 | 0.9241  | 0.5915  | 0.5301  | 0.23    | -0.0344 | -0.5316 | -1.1184 | -1.0776 | -0.9203 |
| PVX_085445 | -1.3166 | -0.8549 | -0.7028 | -0.4597 | -0.3242 | -0.3406 | -0.3083 | 0.3746  | 0.2249  |
| PVX_080500 | 0.5874  | 0.6744  | 0.4343  | 1.0607  | 0.8317  | 0.4206  | 0.2084  | 0.0874  | -0.0602 |
| PVX_113590 | 0.4463  | -0.5045 | -1.1125 | -1.5071 | -1.1497 | -0.4889 | 0.5428  | 0.8234  | 0.4807  |
| PVX_092085 | 0.747   | 0.7463  | 0.7186  | 0.5174  | 0.224   | -0.2469 | -0.7165 | -1.0533 | -0.9963 |
| PVX_098045 | 0.0598  | 0.5215  | 0.4722  | 0.0408  | 0.0848  | -0.1452 | -0.7263 | -0.7843 | -0.3102 |
| PVX_000800 | -0.2916 | -0.5141 | -0.083  | 0.524   | 0.7204  | 0.8038  | 0.3689  | 0.0919  | 0.1592  |
| PVX_084220 | 0.9198  | 1.0977  | 0.6785  | 0.3444  | -0.0537 | -0.6077 | -0.4484 | -0.3674 | -0.1076 |
| PVX_117105 | 0.9189  | 0.6647  | 0.7495  | 1.1563  | 0.9439  | 0.2282  | 0.2012  | -0.8417 | -0.7105 |

|            |         |         |         |         |         |         |         |         |         |
|------------|---------|---------|---------|---------|---------|---------|---------|---------|---------|
| PVX_101315 | -0.2921 | -0.2259 | -0.1991 | -0.2955 | -0.2353 | -0.0468 | -0.1    | -0.2821 | -0.554  |
| PVX_092445 | 0.9669  | 0.3564  | 0.3015  | 0.3741  | 0.1191  | -0.3247 | -0.4446 | -0.2696 | -0.115  |
| PVX_094375 | 0.4603  | 0.627   | 0.7117  | 0.7261  | 0.7724  | 0.3031  | -0.8839 | -1.4214 | -1.0281 |
| PVX_090920 | -0.3287 | 0.3108  | 0.4232  | 0.5657  | 0.4865  | -0.3534 | -0.8336 | -0.8741 | -0.6204 |
| PVX_122025 | -0.4024 | -0.3663 | -0.5705 | -0.4162 | 0.0181  | 0.4393  | 0.1313  | -0.1038 | 0.0088  |
| PVX_081720 | -0.7564 | -0.6741 | -0.0409 | 0.3365  | 0.2688  | -0.1076 | -0.5564 | -0.4658 | -0.4109 |
| PVX_003965 | -0.8095 | -0.0875 | 0.0073  | 0.2145  | 0.3269  | 0.1089  | -0.4087 | -0.6021 | -0.6361 |
| PVX_001705 | 1.0308  | 0.3015  | 0.2267  | 0.0115  | -0.3561 | -0.7842 | -0.8247 | 0.5401  | 0.9492  |
| PVX_112125 | 0.6682  | 0.3307  | 0.0582  | 0.295   | 0.169   | -0.0283 | -0.0497 | -0.0229 | 0.3495  |
| PVX_090020 | -0.916  | -0.2602 | -0.3943 | -0.6866 | -1.2813 | -0.9571 | 0.653   | 0.7542  | 0.2276  |
| PVX_082765 | 0.8514  | 0.2925  | -0.2677 | -0.5293 | -0.9287 | -1.0797 | 0.1845  | 0.5088  | 0.3574  |
| PVX_122190 | 0.5615  | 0.2163  | -0.0864 | -0.0789 | 0.1079  | -0.3386 | -0.4798 | -0.4733 | -0.9178 |
| PVX_091800 | 0.107   | 0.1077  | 0.2243  | 0.1643  | 0.28    | 0.4199  | -0.0873 | -0.4221 | -0.4124 |
| PVX_009090 | 0.2329  | 0.277   | 0.276   | -0.0565 | 0.0602  | -0.4148 | -0.2381 | -0.1128 | 0.02    |
| PVX_111075 | -0.4603 | -1.0734 | -1.3951 | -1.4742 | -1.2513 | -0.2703 | 1.5015  | 0.493   | 0.027   |
| PVX_117890 | -0.3431 | 0.0037  | -0.1083 | -0.0424 | 0.0205  | 0.5587  | 0.1021  | -0.2674 | -0.1169 |
| PVX_092870 | -0.3019 | 0.1457  | 0.144   | 0.0495  | -0.0628 | -0.0295 | 0.0538  | 0.1922  | -0.1171 |
| PVX_100625 | -0.6115 | 0.0717  | 0.3955  | 0.4599  | 0.4315  | -0.2094 | -0.3818 | -0.7336 | -0.8335 |
| PVX_114445 | -0.5181 | 0.1261  | 0.4236  | 0.627   | 0.5381  | 0.3116  | -0.8058 | -1.9052 | -2.0909 |
| PVX_090135 | 0.8442  | -0.0898 | -0.1568 | -0.4943 | -0.3577 | -0.1824 | 0.8449  | 0.8676  | 1.1664  |
| PVX_099560 | 0.3435  | 0.3737  | 0.2443  | 0.058   | -0.1991 | -0.013  | 0.1339  | 0.8429  | 1.1788  |
| PVX_085595 | 0.2553  | 0.0926  | -0.0022 | 0.3978  | 0.39    | 0.6778  | 0.0936  | -0.0251 | 0.1408  |
| PVX_088945 | 0.4716  | 0.6609  | 0.659   | 0.6287  | 0.503   | 0.158   | -0.1543 | -0.4344 | -0.3858 |
| PVX_099765 | -0.1955 | -0.0621 | 0.0141  | 0.0064  | 0.1598  | 0.1666  | -0.1559 | -0.3101 | 0.0194  |
| PVX_113770 | 0.684   | 0.7493  | 0.7496  | 0.6216  | 0.6123  | 0.9433  | 0.2698  | -0.0742 | -0.2982 |
| PVX_083385 | 0.9624  | 0.7914  | 0.8305  | 0.8248  | 0.5192  | 0.3736  | 0.0958  | -0.0448 | -0.1902 |
| PVX_001740 | 0.5285  | 0.192   | -0.2752 | -0.4352 | -0.1142 | 0.5822  | 0.9762  | 1.0641  | 0.9579  |
| PVX_085070 | 0.2437  | 0.2033  | 0.2721  | 0.4055  | 0.4371  | 0.5238  | 0.1344  | -0.0988 | -0.1906 |
| PVX_118470 | -0.7464 | -0.951  | -1.1451 | -1.2494 | -0.9025 | 1.0243  | 0.8855  | 0.1014  | -0.1072 |
| PVX_002825 | -0.4917 | 0.2799  | 0.762   | 0.9507  | 0.8295  | 0.1952  | -0.5062 | -0.6432 | -0.4518 |
| PVX_115170 | -0.0473 | -0.1172 | 0.0519  | 0.0531  | 0.2199  | 0.0715  | 0.1888  | -0.3623 | -0.4518 |
| PVX_080265 | -0.0701 | -0.0005 | 0.0528  | -0.1181 | 0.0362  | -0.1576 | -0.4005 | -0.3547 | -0.5574 |
| PVX_079870 | 0.2641  | 0.0657  | -0.1667 | 0.0013  | -0.2394 | 0.5969  | -0.0022 | 0.4786  | 0.5538  |
| PVX_122055 | -0.2704 | 0.3258  | 0.6792  | 0.8019  | 0.6074  | -0.4323 | -0.6115 | -0.6581 | -0.3954 |
| PVX_097000 | -0.6057 | -1.1649 | -1.7408 | -2.0098 | -2.0164 | -2.1444 | -1.82   | 0.2392  | 0.7894  |
| PVX_115440 | -0.9083 | -0.3909 | 0.3887  | 0.656   | 0.5381  | 0.3609  | -0.4104 | -0.9501 | -0.6234 |
| PVX_083315 | 0.4677  | 0.0299  | -0.0579 | -0.2472 | 0.0623  | -0.2706 | -0.001  | 0.5306  | 0.6847  |
| PVX_116945 | 0.4969  | -0.0381 | -0.5669 | -0.8739 | -0.2569 | 0.0766  | 0.0793  | 0.4534  | 0.9649  |
| PVX_118615 | -0.5325 | -0.8218 | -0.7116 | -0.1455 | 0.5569  | 0.8181  | 0.4074  | -0.0203 | -0.1549 |
| PVX_114840 | 0.4383  | 0.1279  | -0.3272 | -0.5862 | -0.4502 | -0.0829 | 0.51    | 0.643   | 0.6801  |
| PVX_123700 | -0.853  | -0.983  | -1.1364 | -1.4965 | -1.4835 | -0.7102 | 1.2076  | 1.3058  | 0.5903  |
| PVX_088820 | -0.7906 | -0.7378 | -0.6946 | -0.8679 | -1.2926 | -1.8276 | -1.5704 | 0.5976  | 1.1117  |
| PVX_113990 | 0.4835  | 0.9518  | 1.0773  | 0.9081  | 0.4084  | -0.6651 | -0.6961 | -0.6304 | -0.4241 |
| PVX_089460 | -0.5662 | -0.5375 | -0.3244 | -0.1569 | -0.3879 | -0.337  | 0.0339  | 1.1134  | 1.0692  |
| PVX_092080 | -0.413  | -0.3616 | -0.2304 | -0.3997 | -0.6872 | 0.1566  | 0.5075  | 0.2405  | -0.1011 |
| PVX_084595 | -0.5352 | -0.634  | -0.5998 | -0.4263 | -0.4947 | -0.2193 | 0.8665  | 0.5447  | 0.1287  |
| PVX_087970 | 0.3979  | 0.7189  | 0.8597  | 0.6782  | 0.1752  | -0.4288 | -0.9499 | -1.4584 | -1.2757 |
| PVX_003745 | -0.7374 | -0.7314 | -0.7817 | -0.8157 | -0.7879 | -0.1138 | 0.3161  | 0.9985  | 0.6753  |
| PVX_113731 | -0.0337 | 0.2291  | 0.1425  | -0.1564 | -0.1527 | 0.2269  | 0.309   | 0.4709  | 0.3472  |
| PVX_099125 | 0.3826  | 0.3209  | 0.3023  | 0.1989  | 0.3389  | -0.0505 | -0.106  | 0.0947  | 0.0196  |
| PVX_119565 | -0.0278 | 0.058   | 0.2468  | 0.2811  | 0.2253  | 0.1639  | -0.0479 | -0.5193 | -0.4783 |
| PVX_124185 | 0.9358  | 0.6068  | 0.3806  | 0.2631  | 0.0595  | -0.2065 | -0.2324 | -0.4957 | -0.4019 |
| PVX_117100 | -0.1638 | -0.5438 | -0.5366 | -0.0536 | 0.4618  | 0.7795  | 0.2193  | 0.0313  | 0.2554  |
| PVX_117185 | 0.4381  | -0.0231 | -0.4816 | -0.6215 | -0.1954 | 0.726   | 0.7523  | 1.0624  | 0.9239  |
| PVX_094780 | 0.877   | 0.4511  | 0.4384  | 0.1602  | -0.2116 | -0.703  | -0.1178 | 0.4177  | -0.0158 |
| PVX_081415 | 0.1567  | 0.2746  | 0.4414  | 0.6521  | 0.8877  | 0.5287  | 0.8908  | 0.4559  | 0.1147  |
| PVX_122570 | -0.4404 | 0.1658  | 0.0705  | 0.2997  | 0.3282  | -0.0915 | -0.4135 | 0.2534  | 0.2808  |
| PVX_121855 | -1.899  | -1.8624 | -2.0376 | -2.1784 | -2.2155 | -1.681  | -1.6957 | -1.8886 | -1.9009 |
| PVX_083360 | 0.1243  | -0.1526 | -0.1897 | 0.1279  | 0.5512  | 0.2165  | 0.6892  | 0.8374  | 0.4781  |
| PVX_123205 | 0.1001  | 0.2759  | 0.204   | 0.1936  | 0.3223  | 0.5384  | 0.3059  | -0.2113 | -0.3175 |
| PVX_084360 | 0.9899  | 0.5055  | 0.2583  | -0.3428 | -0.4788 | -0.4233 | 0.1382  | 0.8696  | 1.0714  |
| PVX_000950 | -0.7346 | -0.5011 | 0.1684  | 0.5612  | 0.5497  | -0.0511 | -0.3343 | -0.5765 | -0.4949 |
| PVX_082615 | -0.2699 | -0.5533 | -0.6804 | -0.8956 | -0.4488 | 0.2482  | 0.4809  | 0.1814  | -0.2753 |

|            |         |         |         |         |         |         |         |         |         |
|------------|---------|---------|---------|---------|---------|---------|---------|---------|---------|
| PVX_003800 | -1.0454 | -0.2565 | -0.2463 | -0.4563 | -0.6677 | 0.8935  | 0.9815  | -0.0705 | -1.2202 |
| PVX_114785 | 0.1755  | 0.1661  | 0.0064  | 0.1271  | -0.2685 | -0.0501 | -0.1414 | -0.2971 | -0.2999 |
| PVX_101325 | 0.4735  | 0.058   | -0.1939 | -0.1175 | 0.1773  | 0.5965  | 0.3373  | -0.121  | -0.1524 |
| PVX_122925 | 0.0272  | 0.6136  | 0.5928  | 0.6842  | 0.2106  | 0.1076  | 0.0824  | 0.136   | 0.1188  |
| PVX_099045 | -0.0198 | -0.0735 | -0.1915 | 0.0766  | 0.6747  | 0.6694  | 0.5164  | -0.3794 | -0.4675 |
| PVX_097720 | -1.0855 | -1.3455 | -1.5584 | -1.6044 | -1.2133 | -0.4133 | 0.8333  | 0.6859  | 0.2032  |
| PVX_086350 | -0.4111 | -0.6783 | -0.3847 | -0.0343 | 0       | -0.3722 | -0.2934 | -0.264  | 0.2971  |
| PVX_089140 | -0.5745 | 0.1766  | 0.3799  | 0.4818  | 0.7625  | 0.1324  | -0.9412 | -1.1701 | -1.0692 |
| PVX_000965 | 1.0954  | 0.8335  | 0.6923  | 0.4482  | 0.2879  | -0.2287 | -0.4489 | -0.3049 | 0.1214  |
| PVX_123425 | 1.0061  | 0.4087  | -0.5883 | -1.5097 | -1.8074 | -1.6272 | 0.286   | 1.2644  | 1.6123  |
| PVX_097915 | 0.1029  | 0.263   | 0.4215  | 0.1731  | 0.051   | 0.0207  | -0.6701 | -1.1139 | -0.9644 |
| PVX_117330 | -0.0768 | -0.6842 | -0.294  | 0.0575  | -0.1414 | -0.4752 | 0.0054  | 0.642   | 0.4358  |
| PVX_096175 | 0.1463  | -0.0472 | -0.268  | -0.1434 | -0.21   | -0.3984 | -0.0754 | 0.5608  | 0.9574  |
| PVX_084265 | -0.1353 | -0.1111 | 0.181   | 0.4156  | 0.5248  | 0.6808  | 0.3318  | -0.0726 | 0.06    |
| PVX_091955 | 0.0357  | -0.4704 | -0.4887 | -0.4702 | 0.0496  | 0.1869  | 0.5427  | 0.4204  | 0.421   |
| PVX_084350 | -0.8916 | -0.8957 | -0.7691 | -0.7518 | -0.7675 | -0.7963 | 0.9273  | 0.9918  | 0.4942  |
| PVX_099750 | -0.2082 | -0.3032 | -0.004  | 0.0294  | 0.2412  | 0.2585  | 0.2336  | 0.0023  | -0.0792 |
| PVX_080005 | -0.4224 | -0.5167 | -0.2163 | 0.0835  | 0.7281  | 0.818   | 0.0486  | -0.4349 | -0.4253 |
| PVX_084500 | -0.3843 | -0.4157 | -0.9423 | -0.9825 | -0.2979 | 0.8571  | 1.133   | 0.4622  | 0.0723  |
| PVX_096355 | -0.4773 | 0.4099  | 0.5889  | 0.7143  | 0.5306  | -0.0718 | -0.516  | -0.5591 | -0.448  |
| PVX_114685 | -1.5812 | -0.0834 | 0.1626  | 0.5443  | 0.9021  | 0.8033  | -0.4465 | -1.416  | -1.5079 |
| PVX_123935 | -2.2458 | -0.1021 | 0.2317  | -0.2227 | -1.0709 | -1.8305 | -2.0939 | -1.6064 | -1.3492 |
| PVX_089135 | -0.0125 | 0.8319  | 1.0784  | 1.1748  | 1.0424  | -0.0975 | -0.3898 | -0.3639 | -0.3148 |
| PVX_093545 | 0.7154  | 0.3458  | 0.166   | 0.2137  | 0.0051  | -0.4015 | -0.436  | -0.0699 | -0.0609 |
| PVX_085345 | -0.493  | 0.0849  | 0.4364  | 0.3765  | 0.2306  | -0.3589 | -0.8915 | -1.0573 | -1.0021 |
| PVX_092650 | 0.6367  | 0.1596  | 0.0247  | -0.293  | -0.5734 | 0.022   | 0.2447  | 0.2972  | 0.5729  |
| PVX_092960 | -0.2664 | 0.2686  | 0.1306  | 0.0662  | -0.0445 | 0.1182  | -0.106  | -0.2814 | -0.1862 |
| PVX_115020 | -0.3216 | -0.0549 | -0.0194 | -0.1348 | -0.1389 | 0.25    | 0.3785  | 0.1349  | -0.0736 |
| PVX_114690 | -0.2531 | -0.1139 | 0.2398  | 0.3073  | 0.4647  | 0.4009  | -0.1356 | -0.2075 | -0.1739 |
| PVX_118665 | 0.1794  | 0.2934  | 0.5058  | 0.6067  | 0.2665  | 0.8876  | 0.8889  | 0.5586  | 0.5753  |
| PVX_098590 | 0.249   | 0.3649  | 0.3349  | 0.1594  | 0.1088  | -0.0169 | 0.4331  | 0.6123  | 0.6952  |
| PVX_096325 | 0.4256  | 0.4531  | 0.4876  | 0.4111  | 0.271   | 0.4181  | 0.4582  | 0.2949  | 0.2312  |
| PVX_092455 | 0.3372  | 0.4455  | 0.0983  | 0.1069  | 0.1656  | 0.2196  | -0.3959 | -1.0518 | -1.035  |
| PVX_099055 | -0.5847 | 0.1877  | 0.3494  | 0.4447  | 0.5182  | 0.6568  | -0.2246 | -0.7946 | -0.8282 |
| PVX_094410 | 0.7631  | 0.4286  | 0.3577  | -0.1226 | -0.2375 | -0.2457 | 0.3591  | 0.3282  | 0.9048  |
| PVX_116620 | -0.1901 | 0.6299  | 0.994   | 1.1322  | 0.4993  | -0.3381 | -1.2645 | -1.3307 | -1.1272 |
| PVX_114635 | -0.1361 | 0.1099  | 0.0448  | 0.2158  | -0.185  | -0.137  | 0.1573  | 0.1167  | 0.3548  |
| PVX_091410 | -0.1609 | 0.4951  | 0.298   | -0.0916 | -0.5495 | 0.3438  | -0.2424 | 0.348   | -0.0787 |
| PVX_081210 | 0.4969  | 0.4168  | 0.4332  | 0.4655  | -0.0047 | -0.9247 | -1.144  | -0.1764 | 0.29    |
| PVX_091570 | -0.673  | -1.0242 | -1.3474 | -1.426  | -1.271  | -0.9318 | 0.7684  | 0.7817  | 0.2625  |
| PVX_122290 | -0.0804 | -0.294  | -0.0118 | 0.3127  | 0.2481  | -0.1894 | 0.2104  | 0.1131  | -0.0287 |
| PVX_101285 | 0.6248  | 0.7078  | 0.5153  | 0.2643  | 0.3469  | 0.1157  | -0.4    | -0.7059 | -0.4575 |
| PVX_085755 | -0.2598 | 0.235   | 0.1119  | 0.2785  | 0.0548  | 0.4209  | 0.3579  | -0.1846 | -0.1884 |
| PVX_099995 | 0.0855  | -0.03   | -0.1636 | -0.107  | -0.4177 | 0.3288  | 0.2119  | -0.1817 | -0.5046 |
| PVX_084460 | 0.0112  | 0       | 0.037   | 0.709   | 0.6107  | 0.0895  | 0.1497  | 0.2797  | 0.332   |
| PVX_099270 | 0.1263  | -0.2228 | -0.211  | 0.0209  | 0.4866  | 0.571   | 0.3729  | 0.0326  | 0.0718  |
| PVX_121990 | -1.3316 | -1.4059 | -0.7177 | 0.1634  | 0.4415  | 0.2154  | -0.7044 | -1.2659 | -0.8542 |
| PVX_084495 | -0.5286 | -0.3243 | -0.0462 | 0.3685  | 0.5674  | 0.266   | -0.0847 | -0.8546 | -1.1546 |
| PVX_099930 | -2.5093 | -2.4227 | -2.7814 | -2.9042 | -2.671  | 0.6415  | 1.5025  | 0.5388  | -0.5486 |
| PVX_095010 | -1.1962 | -1.7714 | -1.8357 | -0.8211 | 0.2818  | 0.3735  | 0.3095  | -0.1135 | -0.6684 |
| PVX_000000 | 0.6853  | 0.8657  | 0.4858  | 0.1867  | -0.3672 | -0.2324 | -0.2087 | -0.3438 | 0.0259  |
| PVX_000980 | -0.5104 | -0.6287 | -0.698  | -0.7744 | -0.8106 | -0.7801 | 0.8684  | 1.1357  | 0.5289  |
| PVX_079800 | 0.1101  | 0.3124  | 0.1546  | -0.0191 | 0.002   | 0.6245  | 0.5884  | 0.2     | -0.0073 |
| PVX_093645 | 0.39    | 0.3087  | 0.3135  | 0.1628  | 0.2642  | 0.3531  | 0.2147  | 0.3993  | 0.5604  |
| PVX_117675 | 0.6375  | 0.5772  | 0.136   | -0.3977 | -0.6819 | -0.7287 | -0.3922 | 0.2962  | 1.2409  |
| PVX_003835 | -1.192  | -1.3456 | -1.2423 | -1.3146 | -0.358  | 1.0464  | 0.8181  | 0.0425  | -0.7631 |
| PVX_093600 | 0.1779  | 0.0151  | -0.2165 | -0.4666 | -0.3125 | -0.4341 | -0.4594 | 0.194   | 0.4947  |
| PVX_094915 | 0.4053  | 0.1575  | 0.2239  | 0.1704  | 0.3852  | 0.8526  | 0.6218  | 0.5046  | 0.6479  |
| PVX_100840 | 0.0407  | 0.2646  | 0.1648  | 0.3841  | 0.2377  | 0.3462  | -0.1947 | -0.3781 | -0.4158 |
| PVX_082605 | -0.2774 | -0.2745 | 0.2551  | 0.2843  | 0.6746  | 0.3248  | 0.0197  | -0.1623 | -0.1851 |
| PVX_007080 | -0.0456 | -0.169  | -0.2838 | -0.2809 | -0.5298 | 0.417   | 0.5475  | -0.0015 | 0.0867  |
| PVX_123140 | 0.4682  | 0.4195  | 0.2265  | -0.061  | 0.0151  | 0.0197  | 0.2989  | 0.1301  | 0.2049  |
| PVX_117830 | -0.1605 | 0.3236  | 0.3641  | 0.394   | 0.271   | 0.0387  | -0.2642 | -0.1467 | -0.3734 |

|            |         |         |         |         |         |         |         |         |         |
|------------|---------|---------|---------|---------|---------|---------|---------|---------|---------|
| PVX_001770 | 0.3061  | -0.1301 | -0.1905 | -0.1091 | 0.0202  | -0.1616 | -0.3049 | 0.3098  | 0.4541  |
| PVX_122825 | 0.4972  | 0.64    | 0.5236  | 0.6348  | 0.455   | 0.1453  | 0.0068  | 0.0419  | 0.0519  |
| PVX_118080 | 0.5025  | -0.014  | -0.2937 | -0.1755 | -0.0417 | -0.1495 | 0.7422  | 0.9882  | 0.9209  |
| PVX_090305 | 0.9786  | 0.8185  | 0.5348  | 0.103   | -1.3976 | -1.6658 | -1.5277 | -1.1534 | -0.6319 |
| PVX_094610 | -0.694  | -0.9451 | -0.9512 | -0.2153 | 0.4443  | 0.8376  | 0.401   | -0.0989 | -0.5362 |
| PVX_096935 | 0.6109  | 0.4393  | 0.3335  | -0.098  | 0.0315  | 0.0489  | -0.0849 | 0.1366  | 0.3432  |
| PVX_081240 | 0.1394  | -0.2803 | -0.2557 | -0.1426 | 0.3623  | 0.5874  | 0.1825  | 0.1578  | 0.3458  |
| PVX_119575 | 0.2089  | -0.2187 | -0.3688 | -0.67   | -0.1921 | 0.1666  | 0.4188  | 0.4708  | 0.6813  |
| PVX_084650 | 0.2419  | 0.2042  | 0.4537  | 0.3538  | 0.3914  | -0.648  | -1.2508 | -1.3283 | -0.7669 |
| PVX_094360 | -0.3516 | -0.268  | 0.2548  | 0.9108  | 0.6717  | -0.3341 | -0.8441 | -0.4188 | 0.1729  |
| PVX_115425 | 0.895   | 0.7229  | 0.403   | -0.393  | -0.5855 | -0.6015 | -0.4494 | 0.4636  | 1.6674  |
| PVX_114215 | 0.7542  | 0.3707  | 0.1398  | 0.1294  | -0.0479 | 0.0719  | 0.5153  | 0.8625  | 0.8663  |
| PVX_095345 | 0.2604  | 0.3482  | 0.5744  | 0.3603  | 0.7222  | 0.6244  | 0.5803  | 0.2347  | 0.231   |
| PVX_089295 | 0.2307  | 0.2719  | 0.2727  | 0.3708  | 0.5594  | -0.1292 | -0.1843 | -0.1271 | -0.0927 |
| PVX_091380 | 0.2663  | 0.0299  | -0.0887 | -0.022  | 0.0516  | 0.252   | 0.3972  | 0.4363  | 0.3462  |
| PVX_113395 | -0.3346 | -0.6193 | -0.4234 | -0.0662 | 0.3724  | 0.2852  | 0.0848  | -0.1339 | -0.248  |
| PVX_114610 | 0.6535  | 0.4429  | 0.1697  | -0.3836 | -0.8773 | -0.9064 | -0.7476 | -0.0111 | 1.1764  |
| PVX_092710 | -0.1921 | -0.4163 | -0.5183 | -0.5359 | -0.4883 | 0.0517  | 0.5534  | 0.1916  | -0.0625 |
| PVX_094240 | -0.102  | 0.0733  | -0.0499 | 0.0054  | 0.2226  | 0.93    | 1.174   | 0.7223  | 0.0492  |
| PVX_094625 | 0.3732  | 0.3138  | -0.014  | -0.0441 | -0.2177 | -0.2881 | 0.0072  | 0.1637  | 0.4437  |
| PVX_100775 | 0.076   | -0.3218 | -0.1627 | 0.1733  | 0.3812  | 0.7686  | 0.2014  | 0.1148  | 0.4419  |
| PVX_089520 | 0.5539  | 0.1393  | -0.1408 | -0.6019 | -1.01   | -0.9896 | -0.4801 | 0.1946  | 1.2499  |
| PVX_000985 | 0.3343  | 0.3093  | 0.2608  | 0.1857  | 0.3198  | 0.4332  | 0.6422  | 0.3243  | 0.3414  |
| PVX_000680 | -0.3065 | 0.5499  | 0.6662  | 0.732   | 0.0092  | -0.2839 | -0.1237 | 0.0259  | 0.1254  |
| PVX_124040 | 0.1667  | -0.0609 | 0.3231  | 0.474   | 0.455   | -0.2298 | -0.1781 | -0.0088 | -0.2113 |
| PVX_118210 | 0.4811  | 0.2427  | 0.072   | 0.055   | -0.003  | -0.2631 | -0.079  | 0.0164  | 0.2005  |
| PVX_123100 | 0.0967  | 0.2134  | 0.0143  | -0.1545 | -0.3975 | -0.527  | -0.8682 | -0.5281 | 0.3728  |
| PVX_083375 | -0.784  | -0.4257 | -0.3858 | -0.2086 | 0.1012  | 0.4255  | 0.6626  | 0.2863  | -0.5231 |
| PVX_084285 | -0.3127 | 0.6275  | 0.8505  | 0.7777  | 0.3933  | -0.2921 | -0.2766 | -0.0584 | -0.0664 |
| PVX_083150 | 0.3235  | 0.1565  | 0.0141  | -0.2937 | -0.352  | -0.6683 | -0.2248 | 0.4187  | 0.9049  |
| PVX_085610 | 0.079   | 0.3379  | 0.4263  | 0.329   | 0.2134  | 0.0012  | -0.1609 | 0.0323  | 0.518   |
| PVX_118505 | 0.0619  | 0.3301  | 0.3545  | 0.4654  | 0.2487  | -0.1806 | -0.2777 | -0.4041 | -0.4564 |
| PVX_111065 | -1.0772 | -0.2393 | 0.5593  | 0.8211  | 0.6135  | -0.5929 | -1.0252 | -1.0306 | -0.9264 |
| PVX_099705 | 0.1239  | 0.1725  | 0.3007  | 0.3576  | 0.7659  | 0.5863  | 0.2451  | 0.2166  | 0.2236  |
| PVX_088090 | 0.2475  | 0.0243  | -0.0421 | -0.0239 | -0.4909 | -1.6352 | -1.7166 | 0       | 0.1823  |
| PVX_002485 | 0.833   | 0.9908  | 0.7318  | 0.4924  | -0.9118 | -1.4545 | -1.3851 | -1.3053 | -0.7115 |
| PVX_115140 | -0.6496 | -0.1375 | 0.2571  | 0.5097  | 0.7337  | 0.407   | -0.3504 | -0.7206 | -0.7083 |
| PVX_121880 | 0.9412  | 0.7338  | 0.3685  | -0.0843 | -0.4843 | -0.3821 | -0.4901 | -0.6305 | -0.2947 |
| PVX_082905 | -0.3903 | -0.4689 | -0.7521 | -0.8032 | -0.4598 | 0.4626  | 1.0323  | 0.7167  | 0.1639  |
| PVX_099895 | -0.0687 | 0.7591  | 0.9407  | 0.937   | 0.1957  | -0.0285 | -0.3796 | 0.0417  | -0.118  |
| PVX_111520 | -1.54   | -1.5598 | -1.7349 | -1.8831 | -1.9646 | -1.6083 | 1.1077  | 1.3689  | 0.6522  |
| PVX_092485 | -0.1393 | 1.018   | 1.0491  | 0.7057  | -0.496  | -1.1261 | -0.3407 | -0.3447 | -0.3857 |
| PVX_050190 | -0.089  | 0.1712  | 0.1771  | 0.4363  | 0.4637  | 0.329   | 0.0368  | 0.2303  | -0.1023 |
| PVX_099245 | -0.109  | -0.4762 | -0.6629 | -0.466  | 0.3246  | 0.2967  | 0.8117  | 0.9665  | 0.5823  |
| PVX_085465 | 0.0215  | 0.1497  | 0.0921  | -0.0692 | -0.2651 | 0.0508  | 0.7029  | 0.3153  | 0.1106  |
| PVX_117990 | -0.2285 | -0.2002 | -0.0413 | 0.0796  | 0.2598  | 0.2492  | 0.2613  | 0.1786  | 0.0244  |
| PVX_005575 | -1.346  | -1.3589 | -1.4691 | -1.5275 | -1.1451 | 1.1293  | 0.8592  | -0.2781 | -0.8252 |
| PVX_110885 | 0.8405  | -0.2707 | 0.3529  | 0.4145  | 0.1449  | 0.2194  | 0.2163  | 0.7115  | 0.8284  |
| PVX_092855 | -0.3072 | -0.2973 | 0.0819  | 0.467   | 0.1376  | 0.045   | 0.7235  | 0.5009  | 0.3053  |
| PVX_101615 | -0.8138 | -0.7936 | -0.6427 | -0.6176 | -0.4555 | -0.0365 | -0.5819 | -0.3639 | -0.497  |
| PVX_115120 | -0.8427 | -0.8663 | 0.1663  | 0.5311  | 0.5835  | -0.0998 | -0.5634 | -0.834  | -0.8335 |
| PVX_031690 | 0.355   | 0.9115  | 1.065   | 0.7644  | 0.8055  | 0.157   | -0.3082 | -0.3726 | -0.4663 |
| PVX_084700 | -0.5538 | -0.1338 | 0.2932  | 0.6207  | 0.6238  | -0.0344 | -0.9667 | -1.1115 | -1.0881 |
| PVX_101450 | 0.4928  | 0.2206  | 0       | 0.0881  | 0.4072  | 0.3835  | 0.6149  | 0.0703  | 0.4605  |
| PVX_090090 | 0.713   | 0.0789  | -0.0946 | -0.2234 | -0.0306 | 0.3143  | -0.0189 | -0.4543 | -0.4919 |
| PVX_097555 | 1.0333  | 1.1985  | 1.3001  | 1.1655  | 1.0699  | 0.0499  | -0.1484 | 0.0686  | 0.5371  |
| PVX_116925 | 0.8708  | 0.7115  | 0.5947  | 0.5977  | 0.4763  | -0.1784 | -1.0249 | -0.8081 | -0.3285 |
| PVX_097575 | 0.9028  | 0.4469  | -0.0142 | -0.8107 | -1.9206 | -1.9576 | -1.8879 | -0.3234 | 0.057   |
| PVX_101035 | 0.0562  | 0.1578  | 0.2726  | 0.288   | 0.4     | -0.0786 | -1.0581 | -1.7937 | -1.8265 |
| PVX_122105 | 0.0694  | 0.0484  | 0.7844  | 1.2818  | 0.8905  | 0.2698  | -0.0962 | -0.4876 | -0.2524 |
| PVX_082795 | 0.3997  | 0.0906  | 0.0552  | -0.0181 | 0.0097  | -0.2179 | -0.0202 | 0.0719  | 0.2458  |
| PVX_000535 | 0.4086  | 0.7043  | 0.7003  | 0.6387  | 0.2393  | -0.0959 | -0.2449 | -0.1977 | 0.1     |
| PVX_089665 | -0.2033 | 0.2915  | 0.6715  | 0.5333  | 0.3586  | 0.2386  | 0.0131  | -0.2386 | -0.1854 |

|            |         |         |         |         |         |         |         |         |         |
|------------|---------|---------|---------|---------|---------|---------|---------|---------|---------|
| PVX_084795 | -1.0156 | -0.0964 | 0.3951  | 0.779   | 0.0918  | -1.2041 | -1.4522 | -1.4905 | -1.3444 |
| PVX_085450 | 0.2005  | -0.0249 | 0.263   | 0.2128  | 0.6251  | 1.0713  | 0.3479  | 0.1684  | 0.2058  |
| PVX_117720 | 0.6253  | 0.847   | 0.3721  | 0.2197  | -0.2193 | -0.597  | -0.5191 | 0.2263  | 0.6713  |
| PVX_099250 | -1.5708 | -0.648  | 0.2419  | 0.8031  | 0.8201  | -0.0879 | -1.0492 | -1.3965 | -1.2532 |
| PVX_003855 | 0.6255  | 0.4107  | 0.5242  | 0.4633  | 0.5767  | 0.2781  | -0.0744 | -0.3955 | -0.3021 |
| PVX_079835 | -0.1674 | -0.4611 | -0.3677 | -0.4028 | -0.3696 | -0.6754 | 0.7343  | 0.8274  | 0.5115  |
| PVX_082910 | -0.1266 | -0.3207 | 0.0126  | 0.2308  | 0.1193  | 0.5613  | 0.3117  | 0.1826  | 0.2199  |
| PVX_081555 | -0.2848 | -0.4786 | -0.6418 | -0.6787 | -0.5846 | 0.7392  | 1.0992  | 0.5955  | 0.3527  |
| PVX_122095 | -0.4949 | -0.0062 | 0.3848  | 0.5917  | 0.4756  | 0.3822  | -0.25   | -0.331  | -0.3416 |
| PVX_095150 | -0.1165 | -0.18   | -0.1887 | -0.0755 | 0.0694  | 0.32    | 0.5133  | -0.0174 | -0.0559 |
| PVX_114185 | 0.7607  | 0.3873  | 0.2467  | 0.2059  | -0.171  | -0.2878 | -0.7911 | -0.9201 | -0.8565 |
| PVX_089220 | -1.2415 | -1.2182 | -1.4747 | -1.7216 | -1.7173 | -1.723  | -0.0382 | 1.4994  | 1.2724  |
| PVX_114420 | 0.0443  | -0.0362 | -0.2294 | -0.1498 | 0.145   | 0.4544  | 0.2833  | 0.4326  | 0.6814  |
| PVX_096095 | 0.7122  | 0.5278  | 0.086   | -0.3917 | -0.8067 | -0.9444 | -0.5331 | 0.2927  | 1.159   |
| PVX_123150 | -0.5245 | -0.3535 | -0.3804 | -0.2112 | -0.003  | 0.1344  | 0.0193  | -0.6694 | -1.1938 |
| PVX_089375 | 0.9614  | -0.008  | -0.2858 | -0.3598 | -0.332  | -0.282  | 0.6168  | 1.4076  | 1.4377  |
| PVX_087985 | 0.3903  | 0.617   | 0.6448  | 0.6642  | 0.6476  | -0.1435 | -0.6105 | -0.7446 | -0.5231 |
| PVX_079970 | 0.2816  | 0.7721  | 0.6853  | 0.7571  | 0.9523  | -0.6478 | -0.8362 | -0.719  | -0.6013 |
| PVX_119330 | 0.2708  | 0.1205  | -0.1275 | -0.6818 | -0.8152 | -1.2213 | -0.3349 | 0.1612  | 1.053   |
| PVX_080690 | 0.9466  | -0.0205 | -0.3862 | -0.6804 | -0.8302 | -0.7001 | 0.1358  | 0.8326  | 1.2451  |
| PVX_094945 | -0.4371 | -0.3364 | -0.5079 | -0.3383 | -0.294  | 0.0777  | 0.7165  | 0.4159  | -0.2374 |
| PVX_081295 | 0.0763  | -0.2741 | -0.3038 | -0.2906 | 0.1442  | 0.6371  | 0.6339  | 0.3495  | 0.2251  |
| PVX_115385 | -0.0798 | 0.0137  | 0.1509  | 0.2296  | 0.2892  | 0.2067  | 0.1849  | -0.1134 | -0.108  |
| PVX_122215 | -0.5108 | -0.3245 | 0.0789  | 0.1553  | -0.2415 | 0.2529  | 0.3362  | 0.4932  | -0.0728 |
| PVX_002880 | -0.3792 | -0.3599 | -0.0931 | -0.0019 | -0.0914 | -0.4202 | 0.336   | 0.0713  | -0.0295 |
| PVX_095245 | -0.1132 | -0.5473 | -0.7076 | -0.9613 | -1.1353 | -0.8183 | -0.3866 | -0.2308 | -0.4124 |
| PVX_086955 | 0.0498  | 0.3359  | 0.5667  | 0.5476  | 0.6851  | 0.4945  | 0.1977  | 0.0784  | 0.0535  |
| PVX_111370 | -0.3243 | -0.3885 | -0.3991 | -0.4312 | -0.6381 | -0.7505 | 0.0099  | 1.136   | 0.806   |
| PVX_119530 | -0.8892 | -0.1016 | 0.0719  | 0.1405  | 0.2631  | 0.1958  | -0.7443 | -1.2901 | -1.5502 |
| PVX_080300 | 0.483   | 0.4152  | -0.0616 | -0.5656 | -0.7068 | -0.4652 | 0.047   | 0.5279  | 1.2085  |
| PVX_113515 | 0.3204  | 0.178   | 0.4625  | 0.5832  | 0.324   | 0.3054  | -0.1767 | -0.8204 | -0.9887 |
| PVX_098030 | 0.2778  | -0.1353 | 0.1361  | -0.0467 | 0.6543  | 0.7439  | 0.5538  | 0.2544  | 0.1436  |
| PVX_085160 | -0.9967 | -0.8088 | -0.851  | -0.4999 | 0.2186  | 1.1217  | 0.7409  | -0.0832 | -0.6086 |
| PVX_085820 | 0.2765  | 0.6293  | 0.8284  | 0.6963  | 0.5094  | 0.182   | -0.2557 | -0.4908 | -0.6947 |
| PVX_089930 | -0.5277 | -0.2088 | -0.2947 | -0.2619 | -0.3396 | 0.3583  | 0.9934  | 0.2227  | -0.1109 |
| PVX_101425 | -0.3689 | 0.4216  | 0.557   | 0.5759  | 0.5647  | 0.5986  | -0.0984 | -0.2852 | -0.6483 |
| PVX_122410 | -0.9571 | -0.1207 | 0.1925  | 0.3744  | 0.8919  | 1.3124  | 0.6067  | -0.3287 | -0.513  |
| PVX_099630 | -1.0223 | -0.6175 | 0.1162  | 0.7268  | 1.0901  | 0.8324  | 0.3109  | -0.1638 | -0.3872 |
| PVX_087955 | 0.4165  | 0.2548  | 0.2856  | 0.1707  | 0.1512  | -0.0337 | -0.4079 | -0.7839 | -0.7888 |
| PVX_092935 | 0.2489  | 0.2447  | -0.1329 | -0.4424 | -0.68   | -0.2062 | 0.6165  | 0.7555  | 0.865   |
| PVX_092690 | -0.6686 | -0.1557 | 0.4137  | 0.388   | 0.3196  | -0.2673 | -0.7278 | -0.0958 | 0.264   |
| PVX_118650 | 0.7255  | 0.4751  | 0.1937  | -0.672  | -0.9203 | -1.0219 | -0.618  | 0.4043  | 1.6041  |
| PVX_001880 | -0.0604 | 0.608   | 0.8026  | 0.8542  | 0.6944  | 0.3749  | 0.131   | -0.2202 | -0.1418 |
| PVX_089255 | 0.3438  | 0.2305  | 0.4802  | 0.718   | 0.4991  | 0.3397  | 0.2973  | 0.2984  | 0.398   |
| PVX_092285 | -0.2264 | -0.1544 | 0.4171  | 0.5903  | 0.4938  | -0.0716 | -0.2055 | -0.0737 | -0.2647 |
| PVX_123055 | 1.3149  | 0.8089  | 0.6114  | 0.2957  | 0.4918  | 0.4578  | 0.0742  | -0.1264 | -0.13   |
| PVX_117200 | 0.0534  | 0.6015  | 0.8123  | 0.9172  | 0.704   | -0.0051 | -0.6661 | -0.8328 | -0.657  |
| PVX_089195 | 0.6632  | 0.2606  | -0.2878 | -0.6628 | -0.5029 | -0.2358 | 0.388   | 0.7734  | 1.1528  |
| PVX_095320 | 0.0938  | -0.1569 | -0.0629 | 0.2854  | 0.5888  | 0.6771  | 0.2637  | -0.4098 | -0.619  |
| PVX_106220 | -0.0968 | 0.1532  | -0.4121 | -0.098  | -0.0532 | -0.314  | -0.072  | -0.4118 | -0.34   |
| PVX_082685 | -0.9387 | -1.0176 | -1.2692 | -1.3882 | -1.3779 | -0.452  | 1.2503  | 1.0565  | 0.2084  |
| PVX_089270 | -0.2942 | -0.2103 | 0.2297  | 0.4612  | 0.1877  | -0.299  | -0.4761 | -0.3304 | -0.0917 |
| PVX_118050 | -0.172  | -0.2179 | 0.3318  | 0.7457  | 0.5827  | -0.0685 | -0.2    | -0.2947 | 0.0102  |
| PVX_117395 | 0.6434  | 0.5532  | 0.2459  | 0.1373  | -0.0243 | 0.0854  | -0.0696 | -0.6213 | -0.7788 |
| PVX_112680 | -0.8151 | 1.2485  | 1.386   | 0.5969  | -0.5351 | -1.6    | -1.6208 | -1.6475 | -1.3326 |
| PVX_092220 | 0.5048  | 0.025   | 0.2478  | 0.2273  | 0.3866  | 0.0882  | 0.0382  | 0.5684  | 0.6486  |
| PVX_099610 | -0.1685 | -0.1955 | -0.1516 | -0.1055 | 0.1439  | 0.4481  | 0.8406  | 0.401   | 0.1508  |
| PVX_116805 | 0.4414  | 0.465   | 0.4843  | 0.3904  | 0.3677  | 0.3815  | -0.16   | -0.4608 | -0.4233 |
| PVX_094595 | 0.1622  | -0.0724 | -0.1315 | -0.539  | -0.796  | 0.1635  | 0.7246  | 0.4746  | 0.3364  |
| PVX_114150 | 0.2712  | 0.6269  | 0.6294  | 0.7147  | 0.5667  | -0.1088 | -0.7957 | -0.7822 | -0.9287 |
| PVX_083545 | 0.3503  | 0.0685  | -0.2394 | -0.6651 | -0.9662 | -0.7773 | -0.8239 | 0.4495  | 0.8869  |
| PVX_101195 | -0.0662 | -0.2284 | -0.1962 | 0.1171  | 0.0575  | -0.0777 | -0.1032 | -0.089  | -0.1784 |
| PVX_089305 | 0.0997  | 0.6082  | 0.3826  | -0.0344 | -0.3555 | -0.2088 | 0.6379  | 0.8191  | 0.3031  |



|            |         |         |         |         |         |         |         |         |         |
|------------|---------|---------|---------|---------|---------|---------|---------|---------|---------|
| PVX_081625 | -0.9096 | 0.0112  | 0.2507  | 0.4159  | 0.6973  | 0.3024  | -0.3164 | -0.6805 | -0.7132 |
| PVX_101170 | 0.0055  | 0.6292  | 0.8045  | 0.7762  | 0.4087  | -0.2063 | -0.5869 | -0.3139 | -0.0653 |
| PVX_084920 | 0.3428  | 0.3831  | 0.2273  | 0.1247  | -0.1179 | -0.1562 | -0.2524 | -0.3187 | 0.0962  |
| PVX_003540 | -0.0417 | -0.2732 | -0.2465 | -0.4536 | -0.6663 | -0.6588 | -0.482  | 0.9073  | 1.3372  |
| PVX_088965 | -0.2754 | -0.1899 | -0.2271 | -0.2249 | -0.1539 | 0.457   | 0.2976  | 0.5536  | 0.5186  |
| PVX_100535 | 0.5377  | 0.3905  | 0.2621  | 0.4268  | 0.1868  | -0.1662 | -0.3953 | -0.3773 | -0.6743 |
| PVX_114925 | 0.1456  | 0.4427  | 0.328   | 0.3257  | 0.1107  | -0.1527 | 0.3697  | 0.2299  | -0.1211 |
| PVX_114515 | -0.4186 | -0.1797 | -0.0708 | 0.1021  | 0.1136  | 0.6794  | 0.0305  | -0.8767 | -1.0893 |
| PVX_122530 | 0.0437  | 0.0834  | 0.0721  | 0.1409  | 0.4549  | 0.3822  | 0.3247  | 0.5179  | 0.4006  |
| PVX_097550 | 1.2513  | 1.1211  | 0.7902  | 0.4394  | 0.1325  | -0.3227 | -0.5168 | -0.4764 | -0.2404 |
| PVX_085225 | 0.3516  | 0.3361  | 0.4477  | 0.4138  | 0.5944  | 0.5288  | -0.4517 | -1.3751 | -1.6524 |
| PVX_080270 | -0.8877 | -0.2616 | -0.1527 | -0.1796 | 0.0237  | 0.3966  | 0.7441  | 0.3491  | -0.2872 |
| PVX_099580 | 0.0182  | -0.1002 | -0.197  | -0.2342 | -0.0114 | 0.0845  | -0.1736 | -0.1127 | 0.2064  |
| PVX_099690 | -0.7276 | -0.1383 | -0.008  | 0.0615  | -0.0309 | -0.6654 | -0.6665 | -0.4763 | -0.5926 |
| PVX_123755 | 0.2006  | 0.2019  | 0.3365  | 0.3272  | 0.7012  | 0.1514  | 0.0643  | 0.36    | 0.293   |
| PVX_094560 | -0.4256 | -0.4991 | -0.5355 | -0.6072 | -0.5175 | -0.5779 | 0.9846  | 1.5687  | 0.6856  |
| PVX_084905 | -0.4946 | -0.1668 | -0.0675 | 0.1062  | 0.2137  | 0.6174  | 0.225   | -0.3875 | -0.4831 |
| PVX_000895 | 0.9132  | 0.6115  | 0.4667  | 0.3558  | 0.1081  | -0.0434 | -0.4438 | -0.5904 | -0.4424 |
| PVX_115480 | -0.207  | -0.2583 | -0.1863 | -0.1322 | -0.4845 | -0.3375 | -0.1189 | -0.4944 | -0.1189 |
| PVX_099700 | -0.5769 | -0.174  | -0.2051 | -0.0345 | 0.0791  | 0.2725  | 0.2705  | -0.1762 | -0.3339 |
| PVX_098015 | -0.0793 | 0.0021  | 0.175   | 0.2398  | 0.1595  | 0.7409  | 0.3193  | 0.1735  | 0.1689  |
| PVX_087900 | -0.1993 | -0.8277 | -0.7018 | -0.3964 | 0.0777  | 0.5491  | 0.4415  | 0.5938  | 0.6278  |
| PVX_123770 | 0.8972  | 0.2858  | -0.1862 | -0.8935 | -1.3058 | -1.2397 | -0.5951 | 0.6467  | 1.7272  |
| PVX_083100 | 0.129   | 0.1437  | -0.3352 | -0.819  | -0.7294 | -0.7208 | 0.2595  | 0.4458  | -0.063  |
| PVX_113685 | -0.4365 | -0.2126 | -0.2297 | -0.3901 | -0.3857 | 0.0169  | 0.882   | 0.1594  | 0.0948  |
| PVX_113625 | -0.193  | -0.3476 | -0.1892 | 0.2321  | 0.3611  | 0.2354  | 0.231   | 0.8106  | 0.3261  |
| PVX_093710 | 1.0481  | 0.6466  | 0.3621  | 0.0083  | -0.2206 | -0.2353 | 0.8233  | 1.3883  | 1.4767  |
| PVX_117595 | -0.4584 | -0.0935 | -0.0347 | 0.1468  | 0.1478  | -0.1293 | -0.4429 | -0.5418 | -0.3328 |
| PVX_089890 | -0.7305 | -0.1776 | -0.0605 | 0.2495  | 0.3009  | 0.2957  | -0.3429 | -0.8081 | -0.5257 |
| PVX_091090 | -0.6729 | 0.6268  | 0.9017  | 1.1271  | 0.8765  | -0.117  | -0.6227 | -0.5213 | -0.3676 |
| PVX_113910 | -0.1024 | -1.0331 | -1.2653 | -1.272  | -0.5278 | 0.9395  | 0.4545  | 0.1035  | 0.0718  |
| PVX_122365 | -1.9036 | -1.7673 | -2.1327 | -2.2131 | -2.0073 | -1.7377 | 0.3347  | 1.5909  | 1.2259  |
| PVX_080290 | -0.4816 | -0.9549 | -0.6647 | 0.1323  | 0.7195  | 0.5643  | -0.2289 | -0.3902 | -0.5441 |
| PVX_099730 | 0.701   | 0.2041  | 0.2125  | 0.0939  | -0.0493 | 0.5943  | 0.4677  | 0.0577  | 0.2354  |
| PVX_122180 | 0.5031  | 0.7139  | 0.8475  | 0.7593  | 0.4481  | 0.1829  | -0.2741 | -0.4642 | -0.5637 |
| PVX_083135 | 0.6373  | 0.5144  | 0.2563  | 0.1984  | 0.1047  | 0.229   | -0.1451 | -0.3806 | -0.0612 |
| PVX_000590 | 0.164   | 0.3676  | 0.2971  | 0.3221  | 0.3266  | -0.0964 | -0.9842 | -0.6418 | -0.6101 |
| PVX_099165 | 0.4385  | 0.1813  | 0.047   | -0.0656 | 0.0482  | 0.3921  | 0.4617  | 0.218   | 0.2894  |
| PVX_115250 | 0.1947  | 0.0443  | -0.1081 | -0.0302 | 0.0273  | -0.884  | -0.3325 | 0.0804  | 0.0226  |
| PVX_084540 | 0.5236  | 0.5952  | 0.1946  | -0.5467 | -1.0351 | -1.2003 | -0.7699 | 0.2494  | 1.4834  |
| PVX_081390 | -0.9094 | -0.4142 | -0.3206 | -0.0758 | 0.2379  | 0.216   | 0.2188  | -0.1325 | -0.8093 |
| PVX_085940 | 0.4302  | 0.4268  | 0.4551  | 0.5324  | 0.2069  | -0.3718 | -0.3511 | -0.2033 | 0.2005  |
| PVX_100930 | -0.9444 | -0.0982 | 0.4984  | 0.7455  | 0.4552  | 0.2018  | -0.4863 | -0.7263 | -0.5531 |
| PVX_095060 | 0.2559  | 0.4278  | 0.5226  | 0.3091  | 0.4738  | 0.0652  | 0.1023  | 0.1007  | 0.323   |
| PVX_091000 | -0.3201 | 0.539   | 0.5726  | 0.439   | 0.4953  | -0.1103 | -0.576  | -0.3943 | -0.4253 |
| PVX_113290 | -0.2444 | 0.5262  | 0.9245  | 1.254   | 1.0136  | -0.2038 | -0.6656 | -0.9741 | -0.882  |
| PVX_114430 | 1.0698  | 0.3517  | 0.2624  | 0.127   | -0.0122 | -0.4702 | 0.0816  | 0.6349  | 1.02    |
| PVX_082625 | -0.5003 | -0.114  | 0.3532  | 0.489   | 0.54    | 0       | -0.3971 | -0.6504 | -0.6866 |
| PVX_122300 | 0.683   | 0.3408  | 0.0909  | -0.5978 | -0.5966 | -0.1283 | -0.4285 | 0.352   | 1.3158  |
| PVX_088860 | -0.0986 | -0.037  | -1.8643 | -1.6997 | -2.3554 | -2.1121 | -1.2813 | 1.2841  | 1.5899  |
| PVX_096165 | -0.0839 | 0.0246  | 0.3678  | 0.3963  | 0.4432  | 0.4627  | -0.1032 | 0.0307  | -0.0577 |
| PVX_001890 | -0.1213 | 0.3298  | 0.6833  | 0.5628  | 0.2061  | -0.045  | -0.3937 | -0.3038 | -0.1446 |
| PVX_056690 | 0.3763  | 0.2911  | 0.203   | 0.0164  | 0.3204  | 0.2572  | 0.0101  | 0.1252  | 0.0985  |
| PVX_100990 | 1.1471  | 0.8042  | 0.8194  | 1.0005  | 0.7093  | 0.3415  | -0.4998 | -0.6643 | -0.4541 |
| PVX_099105 | -0.014  | 0.0222  | -0.0287 | -0.025  | -0.0911 | -0.2952 | -0.0081 | 0.2357  | 0.2992  |
| PVX_087790 | 0.0929  | 0.1318  | 0.172   | 0.3596  | 0.1945  | 0.2308  | -0.1309 | -0.2022 | -0.1878 |
| PVX_122120 | -0.7705 | -0.6913 | -0.4247 | 0.3483  | 0.5815  | 0.22    | -0.1053 | 0.3218  | 0.3879  |
| PVX_112650 | -0.0994 | 0.1851  | 0.2069  | 0.2108  | -0.1871 | -0.4456 | -0.6578 | -0.3579 | 0.0358  |
| PVX_085235 | 0.383   | 0.2669  | 0.3515  | 0.2004  | 0.2535  | 0.3421  | 0.3186  | 0.0993  | -0.0705 |
| PVX_085675 | -0.2474 | -0.1309 | -0.0433 | -0.0591 | 0.258   | 0.4741  | 0.3164  | 0.012   | -0.0673 |
| PVX_117125 | 0.4951  | 0.2517  | 0.2851  | 0.3452  | 0.175   | -0.0047 | -0.256  | -0.1629 | -0.2108 |
| PVX_100645 | -0.4237 | 0.0064  | 0.2524  | 0.4795  | 0.4436  | 0.5426  | 0.1165  | -0.0378 | -0.2314 |
| PVX_117145 | 0.0342  | 0.2095  | 0.2398  | -0.0217 | -0.2516 | -0.5614 | -0.5306 | 0.5681  | 0.7536  |

|            |         |         |         |         |         |         |         |         |         |
|------------|---------|---------|---------|---------|---------|---------|---------|---------|---------|
| PVX_118325 | 0.1157  | 0.7492  | 0.8585  | 0.7582  | 0.7264  | -0.0429 | -1.0932 | -1.2545 | -1.1782 |
| PVX_095420 | -0.2615 | -0.1281 | -0.1037 | -0.0901 | -0.1416 | 0.2195  | -0.1006 | -0.0975 | -0.2726 |
| PVX_032690 | 0.5904  | 0.2951  | 0.3264  | 0.0057  | 0.1407  | 0.2145  | 0.3224  | 0.0788  | 0.2724  |
| PVX_018660 | -0.6061 | -0.394  | -0.6896 | -0.5505 | 0.0961  | 1.1955  | 1.7068  | 1.5713  | 1.0629  |
| PVX_122260 | -0.44   | -0.1794 | 0.2835  | 0.3421  | 0.5551  | 0.2374  | 0.0393  | 0.1136  | 0.1599  |
| PVX_090945 | -0.9186 | -1.6837 | -1.9751 | -2.1153 | -1.2662 | 0.9247  | 1.6993  | 0.4097  | -0.4447 |
| PVX_122270 | -0.3493 | -0.3977 | -0.3807 | 0.0676  | 0.5993  | 0.8519  | 0.7705  | 0.4853  | 0.2406  |
| PVX_095270 | 0.4711  | 0.4802  | 0.2468  | 0.0267  | -0.1989 | -0.6711 | -0.9053 | -1.3235 | -1.1568 |
| PVX_119310 | -0.6884 | -0.5712 | 0.1141  | 0.4748  | 0.7078  | 0.4991  | -0.2146 | -0.5016 | -0.2864 |
| PVX_090965 | -1.1483 | 0.3748  | 0.5843  | 0.9444  | 0.7455  | -0.3749 | -1.0076 | -1.0622 | -1.1074 |
| PVX_117505 | 0.0938  | 0.299   | 0.5879  | 0.8458  | 0.6206  | 0.471   | 0.0378  | 0.0947  | 0.006   |
| PVX_000835 | 0.9365  | 0.3631  | 0.0597  | -0.302  | -0.6992 | -0.8785 | -0.0279 | 0.7431  | 1.0657  |
| PVX_112110 | 0.3686  | 0.1343  | -0.3654 | -0.7357 | -1.2853 | -1.9801 | -1.9515 | 0.5094  | 1.2176  |
| PVX_095145 | 0.2749  | 0.1525  | 0.1038  | 0.1177  | 0.2985  | 0.5793  | 0.6433  | 0.0856  | -0.2591 |
| PVX_122800 | 0.1355  | 0.2341  | 0.3801  | 0.5283  | 0.5387  | 0.5834  | 0.1335  | -0.1922 | -0.3312 |
| PVX_088085 | -0.5505 | 0.4655  | 0.6103  | 0.5503  | 0.1542  | -0.5421 | -1.1763 | -1.0359 | -0.783  |
| PVX_098935 | 0.1924  | 0.4795  | 0.7483  | 0.4543  | -0.2855 | 0.1542  | -0.4361 | -0.4268 | -0.2781 |
| PVX_112100 | 0.0287  | -0.0617 | 0.0984  | 0.0197  | -0.2486 | 0.4689  | 0.1305  | 0.0699  | 0.071   |
| PVX_000020 | -0.2804 | 0.1248  | 0.2563  | 0.3384  | -0.1181 | -0.6281 | -0.712  | -0.783  | -1.2908 |
| PVX_118670 | 0.2564  | 0.1126  | 0.0047  | 0.2915  | 0.2996  | 0.2626  | 0.3345  | 0.3227  | 0.4     |
| PVX_114015 | -0.5395 | -1.0035 | -0.9406 | -0.6425 | 0       | 0.5395  | 1.1475  | 0.4652  | -0.0815 |
| PVX_083290 | -0.9836 | -0.4573 | 0.2178  | 0.1679  | 0.3815  | -0.415  | -0.7076 | -0.368  | -0.6451 |
| PVX_057190 | 0.4491  | 0.3454  | 0.4249  | 0.5951  | 0.41    | 0.2745  | 0.3888  | 0.6028  | 0.6909  |
| PVX_085895 | -0.2989 | 0.1731  | 0.2038  | 0.2796  | 0.206   | 0.4611  | 0.6568  | 0.4355  | 0.4443  |
| PVX_086930 | 0.0436  | 0.012   | -0.0478 | 0.0659  | 0.1566  | 1.2007  | 1.72    | 0.9883  | 0.4524  |
| PVX_091305 | 0.1351  | -0.0225 | -0.2938 | -0.5005 | -0.4848 | -0.3905 | 0.3286  | 0.9692  | 0.6749  |
| PVX_003775 | -1.3741 | -1.2026 | -1.2967 | -1.4602 | -1.4739 | 1.2996  | 1.4826  | 0.7052  | -0.0155 |
| PVX_027690 | -0.0914 | -0.186  | -0.0775 | 0.0412  | 0.2     | 0.1946  | 0.2435  | 0.0391  | 0.0535  |
| PVX_113580 | -0.5727 | -0.6805 | -0.5336 | -0.2016 | 0.107   | 0.6848  | 0.2326  | -0.1193 | -0.3572 |
| PVX_089415 | 0.3338  | 0.329   | 0.4122  | 0.428   | 0.5166  | 0.5149  | -0.289  | -0.6119 | -0.5562 |
| PVX_099115 | -0.6136 | 0.072   | 0.4295  | 0.5627  | 0.6223  | 0.3309  | -0.6395 | -1.0846 | -0.8853 |
| PVX_098770 | 1.284   | 0.7109  | 0.4775  | 0.4648  | -0.2869 | -0.7493 | -0.3387 | -0.0252 | 0.0602  |
| PVX_117075 | -0.3605 | -0.6551 | -0.6638 | -0.1797 | 0.1537  | 0.6834  | 0.3617  | -0.0741 | -0.1606 |
| PVX_082400 | 0.2749  | 0.1572  | 0.085   | 0.1305  | 0.4734  | 0.7093  | 0.9004  | 0.256   | 0.2746  |
| PVX_119605 | -0.7408 | -0.874  | -0.0188 | 0.3183  | 0.8069  | 0.4658  | -0.1756 | -0.48   | -0.599  |
| PVX_085515 | -0.7017 | 0.3816  | 0.3903  | 0.4719  | 0.3465  | -0.1629 | -0.5763 | -0.7796 | -0.5253 |
| PVX_085090 | 0.0407  | 0.3875  | 0.5082  | 0.684   | 0.7966  | 0.6207  | 0.2172  | -0.0391 | -0.3334 |
| PVX_101130 | 0.0782  | 0.4681  | 0.0837  | 0.1382  | -0.0236 | -0.1454 | 0.1602  | 0.4894  | 0.0394  |
| PVX_082675 | -1.473  | -1.6852 | -1.7146 | -1.9092 | -1.9596 | -1.5933 | -1.1059 | -0.9616 | -0.8925 |
| PVX_083415 | 0.5294  | 0.5295  | 0.5817  | 1.0832  | 0.5875  | 0.4406  | 0.1932  | 0.5491  | 0.1207  |
| PVX_083030 | -0.717  | -0.7625 | -0.7799 | -0.9325 | -1.0092 | -1.3299 | -0.5994 | 1.3475  | 1.2635  |
| PVX_080210 | 0.3389  | 0.2701  | 0.1466  | -0.0247 | 0.2189  | 0.2372  | 0.2276  | 0.1046  | 0.0275  |
| PVX_059190 | -0.2372 | -0.8015 | -0.5844 | -1.0663 | -0.411  | -0.9263 | -0.8715 | -0.9074 | -0.5683 |
| PVX_116795 | 0.6089  | -0.068  | -0.337  | -0.5726 | -0.2637 | 0.2956  | 0.2342  | 0.423   | 0.858   |
| PVX_123420 | -0.4414 | 0.5716  | 0.8571  | 0.9194  | 0.9794  | 0.5606  | -0.1809 | -0.0626 | 0.104   |
| PVX_089535 | 0.2682  | -0.059  | -0.4037 | -0.7621 | -0.7578 | -0.5698 | 0.3895  | 0.6102  | 0.6719  |
| PVX_111440 | -0.8273 | -0.5548 | -0.5866 | -0.4371 | -0.3984 | 0.8162  | -0.0006 | -1.1011 | -1.1126 |
| PVX_099905 | 0.0669  | 0.2527  | 0.3535  | 0.2845  | 0.3932  | 0.4742  | 0.2806  | -0.1784 | -0.3969 |
| PVX_094980 | 0.1524  | 0.271   | 0.1508  | 0.2379  | -0.1415 | 0.2561  | -0.2664 | -0.3386 | -0.8455 |
| PVX_080590 | 0.7957  | 0.377   | -0.0187 | -0.4003 | -0.6477 | -0.5815 | 0.0667  | 0.5491  | 0.9957  |
| PVX_092955 | -0.4477 | -0.6108 | -1.0107 | -1.4479 | -1.0471 | 0.1804  | 0.0418  | -0.6434 | -0.5427 |
| PVX_096310 | 0.283   | 0.4175  | 0.4481  | 0.4391  | 0.1973  | 0.4104  | -0.2323 | -0.4386 | -0.408  |
| PVX_113785 | 0.7238  | 0.5256  | 0.5645  | 0.5766  | 0.5661  | 0.2479  | -0.3337 | -0.8442 | -0.9907 |
| PVX_087155 | 0.2923  | 0.0653  | 0.2259  | 0.3581  | 0.2214  | 0.4886  | -0.0462 | 0.0042  | 0.6212  |
| PVX_085170 | 0.6184  | -0.4412 | -0.3477 | -0.037  | 0.2683  | 0.4734  | 0.5354  | 0.4468  | 0.8019  |
| PVX_098055 | -0.7513 | -0.7913 | -0.5565 | -0.0247 | 0.4035  | 0.099   | -0.0906 | -0.6769 | -0.6126 |
| PVX_119540 | -0.1595 | 0.6311  | 0.8827  | 0.9226  | 0.6472  | -0.3022 | -0.8176 | -0.8636 | -0.6013 |
| PVX_123560 | 0.6519  | 0.3895  | 0.3449  | 0.14    | -0.1299 | 0.1775  | 0.327   | 0.3814  | 0.2697  |
| PVX_084585 | 0.9815  | 0.6216  | 0.2465  | -0.0174 | -0.2491 | -0.4051 | -0.0623 | 0.5916  | 1.1618  |
| PVX_085985 | -0.3736 | 0.0243  | 0.2103  | 0.4397  | 0.0773  | -0.1905 | 0.5234  | 0.6829  | 0.1459  |
| PVX_089935 | 0.5149  | 0.7395  | 0.8489  | 0.6986  | 0.2213  | 0.1508  | -0.1035 | 0.1429  | 0.2976  |
| PVX_123090 | 0.3805  | 0.3546  | 0.4487  | 0.3567  | 0.2015  | 0.4622  | 0.0054  | -0.2026 | -0.0915 |
| PVX_091025 | -0.697  | 0.452   | 0.5945  | 0.5047  | 0.3401  | -0.2762 | -1.1615 | -1.2812 | -1.1068 |

|            |         |         |         |         |         |         |         |         |         |
|------------|---------|---------|---------|---------|---------|---------|---------|---------|---------|
| PVX_104690 | 0.7034  | 0.6203  | 0.5798  | 0.8562  | 0.4061  | 0.2904  | 0.0535  | -0.1664 | 0.1015  |
| PVX_113745 | -0.2077 | -0.18   | -0.4742 | -0.2445 | -0.2682 | 0.3324  | -0.1012 | -0.2191 | -0.2795 |
| PVX_082425 | 0.258   | 0.3865  | 0.3358  | -0.0718 | 0.0374  | 0.331   | 0.5931  | 0.2802  | -0.0257 |
| PVX_122320 | 0.3191  | 0.2659  | 0.5449  | 0.6239  | 0.3796  | -0.1529 | -0.2504 | -0.02   | 0.024   |
| PVX_084655 | -1.1238 | -0.1893 | 0.1992  | 0.5291  | 0.636   | 0.0491  | -0.5829 | -0.79   | -1.0074 |
| PVX_085120 | -0.8024 | -0.8107 | -0.8758 | -0.8442 | -0.5616 | -0.2074 | 0.8324  | 0.6802  | -0.116  |
| PVX_098820 | -0.0321 | -0.2759 | -0.6685 | -0.9099 | -0.9177 | -0.5331 | 0.507   | 1.047   | 0.9092  |
| PVX_100730 | -1.816  | -1.3864 | -0.5002 | 0.0854  | 0.8188  | 0.928   | 0.3339  | -0.3785 | -1.1821 |
| PVX_094450 | 0.4477  | 0.1859  | -0.0952 | -0.0443 | 0.5453  | 0.4465  | 0.3666  | 0.517   | 0.556   |
| PVX_082725 | -0.5835 | -0.049  | 0.0695  | 0.3661  | 0.2351  | 0.4544  | -0.1931 | -0.5459 | -0.5789 |
| PVX_119525 | 0.0735  | -0.2395 | -0.2715 | -0.086  | 0.0703  | 0.1968  | 1.1883  | 0.6339  | 0.3876  |
| PVX_091775 | 0.153   | -0.6489 | -0.957  | -0.8509 | 0.0797  | 0.1982  | 0.6579  | 0.5864  | 0.89    |
| PVX_003820 | -1.1742 | -1.0917 | -1.0073 | -0.9989 | -0.777  | -0.5864 | -0.5844 | -0.6342 | -0.9668 |
| PVX_087765 | -0.7896 | -1.2771 | -1.4998 | -1.7751 | -1.6242 | 0.0826  | 1.5418  | 0.7187  | -0.4349 |
| PVX_089310 | -1.3052 | -1.0932 | -1.3402 | -1.2353 | -0.8923 | 0.9748  | 1.1173  | 0.0561  | -0.5639 |
| PVX_113495 | 0.4394  | 0.7473  | 0.688   | 0.713   | -0.0528 | -0.1795 | -1.0141 | -1.1258 | -1.2113 |
| PVX_118090 | -0.3837 | -0.0056 | 0.1527  | 0.2014  | 0.2331  | 0.7394  | 0.6721  | -0.1268 | -0.7906 |
| PVX_086325 | -0.3045 | -0.3031 | -0.0461 | 0.2003  | -0.2045 | -0.3618 | -0.2988 | -0.1996 | -0.0763 |
| PVX_089565 | 0.7285  | 0.0038  | -0.6821 | -0.2331 | 0.486   | -0.0726 | 0.6403  | 1.1799  | 0.928   |
| PVX_000970 | 0.2692  | 0.1773  | 0.2884  | 0.4233  | 0.5638  | 0.2316  | -0.0924 | -0.5982 | -0.8715 |
| PVX_123805 | -0.3057 | 0.0785  | 0.2307  | 0.3174  | 0.3144  | 0.1456  | 0.0419  | -0.1494 | -0.2443 |
| PVX_086025 | 0.3235  | -0.0828 | -0.106  | -0.0321 | -0.0382 | 0.5884  | 0.1108  | -0.0008 | 0.3589  |
| PVX_084465 | -0.1727 | -0.2371 | 0.2482  | 0.57    | 0.9578  | 0.7818  | 0.1093  | -0.1708 | -0.2021 |
| PVX_110990 | -0.7293 | -0.6683 | -0.407  | -0.2973 | 0       | 0.4522  | 0.5058  | 0.0566  | -0.2791 |
| PVX_122250 | -0.338  | -0.0756 | 0.11    | 0.0952  | 0.1515  | 0.3805  | 0.374   | -0.1818 | -0.4333 |
| PVX_117275 | -0.2731 | -0.0986 | 0.4271  | 0.5757  | 0.7816  | -0.0367 | -0.4356 | -0.2699 | -0.086  |
| PVX_101410 | -0.6388 | -0.4851 | -0.1304 | -0.0127 | 0.4598  | 0.618   | 0.0099  | -0.3369 | -0.2872 |
| PVX_115365 | -0.6081 | -0.192  | -0.0081 | 0.2584  | 0.2429  | 0.3092  | -0.0722 | -0.7485 | -0.8519 |
| PVX_097540 | -0.2122 | 0.4931  | 0.5593  | 0.5151  | 0.4366  | 0.3581  | 0.07    | -0.2254 | -0.5602 |
| PVX_093655 | -0.2473 | -0.1903 | 0.2833  | 0.3963  | 0.7086  | 0.0283  | -0.3331 | -0.4961 | -0.2636 |
| PVX_079805 | 0.2822  | 0.4908  | 0.2648  | 0.2492  | -0.0906 | 0.0837  | -0.6653 | -0.2643 | -0.0299 |
| PVX_092750 | -0.0593 | -0.1292 | -0.3665 | -0.6195 | -0.747  | -0.6304 | 0.8469  | 0.8234  | 0.7109  |
| PVX_123600 | 0.3622  | 0.3531  | 0.1284  | -0.149  | -0.0807 | 0.0809  | 0.3947  | 0.6102  | 0.7939  |
| PVX_116850 | -1.4044 | -1.4606 | -1.2403 | -0.9375 | -0.209  | -0.1825 | 0.6084  | 0.7039  | -0.0211 |
| PVX_122755 | -0.5096 | -0.0311 | 0.0881  | 0.0407  | -0.1254 | 0.0724  | -0.2171 | 0.0023  | 0.2058  |
| PVX_087750 | -0.0882 | -0.1776 | -0.034  | 0.022   | -0.4767 | -0.2924 | -0.251  | -0.2047 | -0.7358 |
| PVX_082515 | -1.2069 | -1.4269 | -1.0616 | -0.531  | 0.1691  | 0.6665  | 0.5397  | -0.7369 | -0.9462 |
| PVX_085310 | 0.6907  | 0.2886  | -0.081  | -0.365  | 0.2172  | 0.5329  | 0.8151  | 0.8804  | 1.0296  |
| PVX_091900 | -0.1446 | -0.5409 | -0.6335 | -0.1293 | 0.2417  | 0.5687  | 0.5829  | 0.2808  | -0.0446 |
| PVX_122255 | 0.4535  | 0.4537  | 0.0794  | -0.1601 | -0.2569 | -0.6179 | 0.3841  | 0.8102  | 0.9217  |
| PVX_000790 | -0.1438 | -0.0435 | 0.0968  | 0.0397  | 0.1346  | 0.4425  | 0.3884  | -0.0575 | -0.1601 |
| PVX_091250 | 0.0699  | -0.1131 | -0.3249 | -0.5705 | -0.471  | -0.0991 | 1.167   | 0.7692  | 0.7473  |
| PVX_117525 | 0.162   | 0.0533  | 0.0743  | 0.0606  | 0.1034  | 0.2536  | 0.005   | -0.4533 | -0.4895 |
| PVX_122135 | -0.2152 | 0.018   | 0.0286  | -0.1367 | -0.1307 | 0.0533  | 0.5199  | -0.079  | -0.3387 |
| PVX_000600 | -0.0122 | -0.2571 | 0.4026  | 0.5979  | 0.6083  | -0.008  | 0.2141  | 0.0743  | -0.217  |
| PVX_117950 | 0.265   | 0.3982  | 0.523   | 0.4649  | 0.3828  | 0.2628  | 0.1278  | 0.0284  | 0.1967  |
| PVX_119220 | -0.3456 | 0.5979  | 0.3443  | 0.4232  | 0.2285  | -0.4731 | -0.8211 | -1.0449 | -0.6759 |
| PVX_017650 | -0.3415 | -0.3275 | -0.1348 | 0.0693  | -0.0613 | -0.6322 | -0.8499 | -0.7373 | -0.3914 |
| PVX_095300 | 0.3076  | 0.3324  | 0.1957  | 0.1039  | 0.0251  | 0.4722  | 0.2994  | 0.2975  | 0.354   |
| PVX_086055 | -0.2206 | -0.0054 | -0.4744 | -0.3333 | -0.5556 | -0.2001 | 0.0521  | 0.1303  | 0.5125  |
| PVX_101395 | 0.3804  | 0.444   | 0.5862  | 0.4288  | 0.421   | 0.6681  | -0.0847 | -0.6388 | -0.6166 |
| PVX_081680 | -0.1122 | -0.2896 | 0.0832  | 0.4217  | 0.5239  | 0.5398  | 0.2533  | 0.0505  | -0.1126 |
| PVX_114415 | -0.5264 | 0.5636  | 0.8282  | 0.8757  | 0.5768  | -0.1198 | -0.6442 | -0.5309 | -0.3353 |
| PVX_100915 | 0.6125  | 0.7234  | 0.5111  | 0.3796  | 0.2345  | 0.113   | -0.1315 | 0.0726  | 0.2718  |
| PVX_081575 | 0.4223  | 0.4355  | 0.7539  | 0.7236  | 0.7969  | 0.093   | -0.3543 | -0.385  | -0.5378 |
| PVX_087895 | 0.7055  | 0.737   | 0.7817  | 0.3729  | 0.5263  | 0.2061  | -0.1837 | -0.2512 | 0.0989  |
| PVX_090285 | -1.5163 | -1.096  | -0.4163 | 0.7738  | 0.9094  | -0.4483 | -1.1412 | -0.988  | -0.5568 |
| PVX_115220 | 0.0431  | 0.2861  | 0.3003  | 0.2636  | 0.6359  | -0.0964 | -0.7902 | -0.8059 | -0.5648 |
| PVX_122420 | 0.161   | 0.7987  | 0.7157  | 0.5493  | -0.1221 | -0.8807 | -0.8995 | -0.6202 | -0.4919 |
| PVX_118110 | 0.3712  | 0.5853  | 0.5459  | 0.3735  | 0.4622  | 0.3391  | 0.0238  | 0.1359  | 0.5172  |
| PVX_097655 | -0.8463 | -0.1346 | 0.1643  | 0.2581  | 0.3941  | 0.4885  | 0.1837  | -0.2729 | -0.1001 |
| PVX_086880 | -0.9513 | -0.8009 | -0.8618 | -1.1859 | -0.9099 | -0.7709 | -1.0425 | -0.9548 | -1.0137 |
| PVX_097725 | -1.0548 | -1.2979 | -1.3722 | -1.4809 | -1.331  | 0.9997  | 0.6814  | -0.1595 | -0.1017 |

|            |         |         |         |         |         |         |         |         |         |
|------------|---------|---------|---------|---------|---------|---------|---------|---------|---------|
| PVX_003475 | -0.7114 | -0.7244 | -0.3335 | 0.4733  | 0.8426  | 0.1902  | -0.3569 | -0.4328 | -0.0878 |
| PVX_114120 | 0.798   | 0.5408  | 0.5458  | 0.5046  | 0.1733  | -0.0652 | -0.337  | -0.482  | -0.2668 |
| PVX_118160 | -0.5526 | -0.8712 | -1.0118 | -1.1339 | -0.8022 | -0.2233 | 0.7888  | 0.407   | 0.2043  |
| PVX_092920 | 0.8127  | 0.0687  | -0.3151 | -0.6878 | -0.5773 | -0.2162 | 0.5652  | 0.8273  | 0.727   |
| PVX_099900 | 0.7774  | 0.5861  | 0.1025  | -0.5918 | -1.5602 | -1.7013 | -1.6172 | -0.4289 | -0.1359 |
| PVX_002650 | 0.3372  | 0.3646  | 0.474   | 0.5269  | 0.6223  | 0.3661  | -0.8639 | -1.4592 | -1.3911 |
| PVX_000760 | 0.1831  | 0.4034  | 0.116   | -0.0928 | -0.1234 | -0.274  | -0.3577 | -0.1384 | 0.0192  |
| PVX_109780 | 0.7604  | 0.787   | 0.3352  | 0.2914  | -0.0395 | -0.1721 | -0.299  | -0.2264 | -0.0367 |
| PVX_089790 | 1.4032  | 0.7884  | 0.4838  | -0.1239 | -0.9466 | -1.3204 | -1.3621 | -0.9173 | -0.2581 |
| PVX_113220 | -0.0665 | -0.2817 | -0.2068 | -0.4527 | -0.5318 | -0.6116 | -0.338  | -0.174  | 0.21    |
| PVX_085315 | -1.0644 | -1.2732 | -1.404  | -1.4729 | -1.4955 | -1.0491 | 0.9206  | 1.3787  | 0.7528  |
| PVX_095250 | 0.6367  | 0.5855  | 0.5627  | 0.5532  | 0.3213  | -0.4026 | -0.6354 | 0.2954  | 0.0774  |
| PVX_094825 | -0.657  | -0.4336 | 0.0059  | 0.1038  | -0.0802 | -0.6484 | 0.1753  | 0.1786  | -0.1794 |
| PVX_092350 | -0.3896 | -0.2287 | -0.06   | -0.0947 | 0.0279  | 0.3027  | 0.1318  | -0.6095 | -0.7661 |
| PVX_116865 | -1.1988 | -0.4955 | -0.4201 | -0.3268 | -0.2507 | 0.1991  | 0.4777  | -0.0199 | -0.3289 |
| PVX_082460 | -0.1596 | 0.0075  | -0.2488 | -0.1582 | 0.2394  | 0.4127  | 0.5368  | -0.4457 | -0.9563 |
| PVX_119360 | 0.4215  | 0.9909  | 1.0641  | 1.1873  | 0.6428  | 0.0449  | 0.081   | 0.404   | 0.3975  |
| PVX_085690 | 0.5224  | 0.5424  | 0.5592  | 0.5693  | 0.416   | -0.3132 | -0.566  | -0.1619 | 0.3512  |
| PVX_003830 | -2.8644 | -2.8535 | -3.1919 | -3.3894 | -3.1542 | -0.0565 | 0.5777  | -0.4108 | -1.3692 |
| PVX_101590 | 0.2972  | 0.5453  | 0.4901  | 0.3873  | 0.2076  | 0.3341  | -0.0442 | -0.3742 | -0.2954 |
| PVX_089070 | 0.7712  | 0.4493  | 0.2266  | -0.309  | -0.9715 | -1.241  | -0.6532 | 0.3247  | 1.304   |
| PVX_112710 | -0.7159 | -0.6538 | -0.8519 | -1.0043 | -0.797  | -0.7698 | -0.0014 | 0.9716  | 0.827   |
| PVX_101190 | 0.1761  | 0.3774  | 0.4088  | 0.4728  | 0.1426  | -0.4064 | -0.0237 | 0.0398  | -0.0497 |
| PVX_114795 | -0.6107 | -0.5459 | -0.2328 | 0.05    | 0.1185  | -0.1826 | 0.5876  | 0.7121  | 0.4252  |
| PVX_122885 | -0.3663 | -0.6661 | -0.7204 | -0.8078 | -0.7629 | 0.546   | 1.0703  | 0.4941  | -0.0171 |
| PVX_088235 | -0.0376 | -0.3326 | -0.6422 | -0.1671 | 0.8488  | 0.7387  | 0.2575  | 0.3188  | 0.1605  |
| PVX_099710 | 0.7755  | 0.5347  | -0.1907 | -0.6704 | -1.7691 | -2.1071 | -2.4787 | 0.0479  | 0.2636  |
| PVX_080090 | -0.0047 | -0.2081 | 0.0603  | 0.06    | 0.042   | -0.1027 | -0.3579 | 0.6814  | -0.5313 |
| PVX_098830 | 0.0398  | 0.7491  | 1.1928  | 1.115   | 0.6965  | -0.232  | -1.0103 | -1.1546 | -1.1668 |
| PVX_000845 | 0.1521  | 0.4848  | 0.3584  | -0.1294 | -0.049  | -0.3005 | -0.535  | -0.0933 | 0.0962  |
| PVX_094815 | -0.223  | -0.0446 | 0.2529  | 0.4789  | 0.254   | 0.5006  | 0.4541  | 0.1395  | 0.1217  |
| PVX_091455 | 0.3678  | 0.0847  | -0.109  | -0.3339 | -0.1676 | -0.5662 | -0.3758 | 0.2178  | 0.9404  |
| PVX_085130 | -0.883  | -0.7707 | -0.7877 | -0.9349 | -0.9543 | -0.495  | 0.8412  | 0.5479  | -0.2194 |
| PVX_083450 | -0.5068 | 0.4692  | 0.6131  | 0.6472  | 0.2489  | -0.1298 | -0.9055 | -1.2781 | -0.937  |
| PVX_114985 | 0.9607  | 0.8337  | 0.6346  | 0.3359  | -0.0836 | -1.1453 | -1.2503 | -0.7215 | -0.5805 |
| PVX_118170 | 0.3492  | 0.2441  | 0.137   | 0.1344  | 0.1308  | 0.4305  | 0.2547  | 0.1973  | 0.3563  |
| PVX_089710 | 0.4452  | -0.1064 | -0.2628 | 0.0449  | 0.3359  | 0.285   | 0.4653  | 0.5049  | 0.5474  |
| PVX_114520 | 0.6996  | 0.4277  | 0.0299  | -0.2782 | -0.3741 | -0.2299 | 0.4306  | 0.5234  | 0.9596  |
| PVX_118150 | 0.2839  | 0.0899  | -0.0588 | 0.0135  | -0.1232 | 0.0837  | 0.2567  | -0.0913 | -0.002  |
| PVX_113340 | -0.2448 | 0.0741  | -0.066  | -0.0537 | 0.5599  | 0.4053  | -0.5281 | -1.104  | -0.8412 |
| PVX_085965 | -0.7872 | -0.5693 | 0.2279  | 0.7368  | 0.6896  | 0.3113  | -0.2379 | -0.5003 | -0.287  |
| PVX_106725 | -0.8364 | -0.8261 | -0.6397 | -0.5458 | -0.6036 | -0.8529 | -0.8814 | -0.9384 | -0.8994 |
| PVX_000720 | -0.512  | 0.4033  | 0.5712  | 0.6272  | -0.1803 | -1.4202 | -0.9105 | -0.0966 | -0.0987 |
| PVX_003565 | -0.0413 | -0.1942 | -0.1953 | -0.3414 | -0.7769 | -1.2986 | -1.5467 | 0.1265  | 0.2826  |
| PVX_119240 | 0.2643  | 0.1766  | 0.3175  | 0.4317  | 0.6028  | 0.3139  | 0.1295  | 0.2489  | 0.6399  |
| PVX_048190 | 0.1799  | -0.0582 | 0.0874  | 0.5036  | 0.6406  | 0.8107  | 0.3232  | 0.0137  | 0.2135  |
| PVX_098920 | -1.0274 | -1.5907 | -1.5968 | -1.1866 | 0.18    | 0.9044  | 0.5562  | -0.1308 | -0.6029 |
| PVX_083185 | 0.0615  | -0.1743 | 0.0461  | 0.1845  | 0.4471  | 0.2299  | -0.0306 | -0.1775 | -0.1921 |
| PVX_084725 | -0.3365 | -0.5053 | -0.6116 | -0.5875 | -0.4845 | -0.7628 | 0.8391  | 1.0226  | 0.3132  |
| PVX_123670 | -0.209  | -0.1326 | 0.2332  | 0.5673  | 0.6382  | 0.1611  | -0.2214 | -0.3701 | -0.396  |
| PVX_096995 | 0.463   | 0.3372  | 0.1174  | -0.0958 | -0.365  | -1.1321 | -1.7003 | -0.99   | -0.6989 |
| PVX_085620 | -0.0363 | -0.1426 | -0.3152 | -0.5684 | -0.2997 | -0.0955 | 0.5406  | 0.8187  | 0.7888  |
| PVX_100545 | -0.2674 | 0.1866  | 0.4671  | 0.5707  | 0.2924  | 0.6776  | 0.4334  | -0.0446 | -0.31   |
| PVX_113500 | -0.2148 | 0.2708  | 0.3982  | 0.2025  | 0.1845  | -0.134  | -0.3989 | -0.3513 | -0.3841 |
| PVX_085250 | 0.5392  | -0.1574 | -0.4179 | -0.7642 | -0.5546 | 0.2554  | 0.5687  | 0.971   | 1.0849  |
| PVX_083395 | 0.5896  | 0.3077  | 0.1949  | -0.2333 | -0.604  | -0.5749 | 0.0091  | 0.6306  | 0.7588  |
| PVX_117645 | 0.885   | 0.2837  | -0.3499 | -0.9973 | -0.4277 | -0.3831 | 0.2892  | 0.8963  | 1.3293  |
| PVX_117580 | 0.8204  | 0.3326  | 0.2045  | 0.419   | -0.1544 | -0.0161 | -0.46   | -0.626  | -0.4579 |
| PVX_123005 | -0.3553 | -0.1675 | 0.2234  | 0.2383  | 0.4747  | -0.0287 | -0.1311 | -0.2106 | -0.1855 |
| PVX_095375 | -0.0946 | -0.295  | -0.1759 | 0.3303  | 0.6415  | 0.7616  | 0.3976  | 0.4234  | 0.2443  |
| PVX_082870 | 0.8671  | 0.3713  | 0.2132  | 0.0108  | -0.2167 | 0.1017  | 0.2897  | 0.4115  | 0.9977  |
| PVX_123250 | -0.2043 | 0.5548  | 0.6896  | 0.7926  | 0.4965  | -0.292  | -0.5487 | -0.5156 | -0.122  |
| PVX_084450 | -1.1698 | -0.1256 | 0.8397  | 0.9273  | 0.5733  | -0.7366 | -1.1878 | -1.245  | -1.2622 |

|            |         |         |         |         |         |         |         |         |         |
|------------|---------|---------|---------|---------|---------|---------|---------|---------|---------|
| PVX_086145 | 0.6876  | 0.4874  | 0.4048  | 0.2082  | 0.3144  | 0.2525  | -0.1654 | -0.241  | 0.0789  |
| PVX_116640 | -0.5391 | 0.0776  | 0.2905  | 0.2209  | 0.0183  | 0.5798  | 0.7414  | -0.0095 | -0.6165 |
| PVX_000015 | 1.1708  | 1.1994  | 0.1201  | -1.0368 | -1.6196 | -1.4984 | -1.5292 | -0.5665 | 0.078   |
| PVX_118245 | 0.0995  | -0.0363 | 0.1974  | 0.6281  | 0.6592  | -0.1138 | 0.0428  | 0.2441  | 0.5649  |
| PVX_114400 | -0.4726 | -0.4994 | -0.4316 | -0.6031 | -0.5319 | -0.3973 | -0.1049 | -0.0283 | -0.1056 |
| PVX_085285 | 0.6626  | 0.3541  | 0.3717  | 0.3702  | 0.2605  | 0.378   | -0.3485 | -0.2984 | -0.3662 |
| PVX_123535 | 0.6872  | 0.2596  | 0.378   | 0.2274  | -0.2202 | 0.3027  | -0.1407 | -0.3786 | -0.0314 |
| PVX_001785 | 0.624   | 0.39    | 0.2403  | -0.0198 | 0.0203  | 0.0373  | 0.133   | 0.5458  | 0.5704  |
| PVX_113985 | 0.8183  | 0.2743  | 0.2387  | 0.286   | 0.3724  | -0.1034 | -0.1695 | -0.1909 | -0.0779 |
| PVX_119260 | -0.809  | -0.0063 | 0.6477  | 0.9221  | 0.7743  | -0.1643 | -0.6188 | -0.9844 | -1.0284 |
| PVX_003940 | 0.78    | 0.7479  | 0.6174  | 0.3383  | 0.3065  | -0.1015 | -0.3109 | -0.2134 | 0.1008  |
| PVX_079885 | -1.1589 | 0.2732  | 0.6511  | 0.5736  | 0.2923  | -1.3343 | -0.6533 | 0.4178  | -0.3824 |
| PVX_114570 | 0.612   | 0.0801  | -0.0189 | -0.0654 | -0.2415 | -1.2711 | -1.8079 | -0.0032 | 0.3221  |
| PVX_113680 | 0.2638  | 0.2795  | 0.1917  | 0.0642  | 0.2553  | 0.39    | 0.4332  | 0.1249  | 0.2084  |
| PVX_100760 | 0.2634  | 0.1253  | 0.0988  | 0.6879  | 0.4746  | 0.2525  | 0.3139  | 0.5419  | 0.4676  |
| PVX_114270 | 0.2965  | -0.0226 | 0.24    | 0.4921  | 0.427   | 0.0506  | -0.4779 | -0.6416 | -0.4103 |
| PVX_114505 | 0.2692  | 0.4155  | 0.8616  | 0.4616  | 0.3318  | 0.3407  | 0.3572  | 0.4251  | 0.2753  |
| PVX_090100 | 0.1655  | 0.0054  | 0.1175  | 0.3387  | 0.3101  | 0.2121  | 0.4688  | 0.8891  | 0.57    |
| PVX_116990 | 0.7079  | 0.5001  | 0.3886  | 0.1131  | 0.135   | -0.243  | -0.2282 | 0.1329  | 0.513   |
| PVX_094520 | 0.1238  | -0.1444 | 0.3007  | 0.3823  | 0.1537  | -0.6538 | -0.517  | -0.1632 | 0.5033  |
| PVX_119630 | -0.0304 | 0.4451  | 0.7382  | 0.5396  | -0.0216 | -1.1622 | -0.9629 | -0.8845 | -0.8545 |
| PVX_090095 | 0.6144  | 0.3202  | 0.4007  | 0.2676  | 0.0258  | -0.1011 | -0.541  | -0.5612 | -0.4637 |
| PVX_122500 | -0.1922 | -0.3988 | -0.4789 | -0.4834 | -0.5404 | -0.6003 | 0.7993  | 0.874   | 0.3302  |
| PVX_080620 | 0.4212  | 0.527   | 0.3027  | 0.1928  | 0.2278  | 0.1676  | 0.5609  | 0.2861  | 0.3825  |
| PVX_081655 | -0.4917 | -0.4149 | -0.2715 | 0.0155  | 0.1669  | -0.0263 | 0.8805  | 1.1103  | 0.3555  |
| PVX_085860 | -0.631  | -0.2799 | -0.2053 | 0.1173  | 0.3733  | -0.0306 | -0.4164 | 0.0231  | -0.0859 |
| PVX_097670 | -1.2261 | -1.176  | -1.1499 | -1.2188 | -1.1475 | -0.4792 | 0.017   | -0.0035 | -0.3035 |
| PVX_086135 | 0.1307  | 0.4398  | 0.611   | 0.8539  | 0.7124  | 0.2444  | -0.17   | -0.0097 | 0.196   |
| PVX_096955 | 0.9156  | 0.648   | 0.5041  | 0.4277  | 0.1389  | 0.0899  | 0.0309  | 0.2     | -0.1902 |
| PVX_087915 | 0.254   | -0.0772 | 0.243   | 0.277   | 0.0222  | 0.2793  | -0.0877 | -0.1148 | 0       |
| PVX_095365 | 0.4942  | 0.0805  | 0.0724  | -0.0085 | 0.0289  | 0.2329  | 0.5034  | 0.6233  | 0.1413  |
| PVX_116530 | 0.318   | 0.793   | 0.9735  | 0.9319  | 0.4787  | -0.0828 | -0.6656 | -0.6248 | -0.6825 |
| PVX_100910 | -0.9823 | -0.983  | -1.0479 | -0.4638 | 0.3924  | 0.9246  | 0.7583  | 0.1362  | -0.0245 |
| PVX_096170 | -0.1126 | 0.4117  | 0.6239  | 0.6379  | 0.4195  | 0.2544  | -0.5073 | -0.4317 | -0.3397 |
| PVX_099110 | 0.091   | 0.2874  | 0.3072  | 0.2803  | 0.5341  | 0.4039  | 0.2645  | 0.1219  | 0.0203  |
| PVX_085340 | 0.4809  | 0.9651  | 1.2445  | 1.2929  | 1.3978  | 1.1376  | 0.6881  | 0.2606  | -0.067  |
| PVX_097010 | -0.2679 | -0.059  | -0.0978 | 0.2437  | 0.3547  | 0.4328  | -0.4803 | -0.4344 | -0.3305 |
| PVX_122655 | 0.2673  | 0.3413  | 0.1172  | -0.3911 | -0.3918 | -0.4461 | -0.2194 | 0.1437  | 0.8811  |
| PVX_094885 | 0.7633  | 0.5625  | 0.4983  | 0.4     | 0.9783  | 0.9106  | 0.925   | 0.8229  | 0.3611  |
| PVX_091055 | 0.6582  | -0.2805 | -0.534  | -0.3365 | -0.077  | 0.1636  | 0.3911  | 0.631   | 0.9368  |
| PVX_098695 | -0.4706 | -0.6737 | -0.3057 | 0.0431  | 0.2863  | 0.1619  | -0.331  | -0.4502 | -0.3312 |
| PVX_087830 | 0.5859  | 0.3536  | 0.0393  | -0.4483 | -0.3571 | -0.4039 | -0.6432 | 0.3982  | 0.8233  |
| PVX_111410 | 0.1119  | 0.2054  | 0.3606  | 0.4029  | 0.2608  | -0.4624 | -0.3082 | -0.0517 | 0.1575  |
| PVX_099120 | 0.0189  | 0.1411  | -0.0175 | -0.3058 | -0.4713 | -0.6782 | -0.6464 | -0.4469 | -0.1795 |
| PVX_080445 | -0.3881 | 0.3999  | 0.5593  | 0.4526  | -0.1408 | -0.7007 | -0.2044 | -0.1738 | -0.5735 |
| PVX_096910 | 0.9725  | 0.4713  | 0.1074  | 0.4608  | 0.4798  | 0.1152  | 0.1231  | 0.058   | 0.2914  |
| PVX_023185 | 0.8354  | 0.8306  | 0.864   | 0.9358  | 0.5215  | 0.4864  | 0.6175  | 0.6834  | 0.6422  |
| PVX_094290 | 0.6351  | 0.6672  | 0.5146  | 0.3007  | -0.1317 | -1.3232 | -1.3015 | -1.1211 | -0.7954 |
| PVX_085870 | 0.5558  | 0.4692  | 0.3931  | 0.1227  | 0.1986  | -0.1688 | -0.4327 | -0.3877 | -0.3859 |
| PVX_117155 | 0.2008  | -0.0594 | -0.1552 | -0.2236 | -0.5446 | -0.1435 | 0.2783  | 0.4783  | 0.9387  |
| PVX_089320 | -0.3912 | 0.2006  | 0.2812  | 0.4009  | 0.4268  | 0.5702  | -0.0395 | -0.5341 | -0.656  |
| PVX_118705 | 1.2536  | 0.9429  | 0.7186  | 0.073   | -0.6126 | -1.0504 | -1.5117 | -1.0048 | -0.2589 |
| PVX_092250 | -0.7882 | 0.4931  | 0.7483  | 0.4795  | 0.3361  | -0.0068 | -0.2967 | -0.2194 | -0.226  |
| PVX_084325 | 0.3028  | 0.1516  | -0.0117 | -0.1115 | 0.0078  | 0.4274  | 0.496   | -0.0051 | -0.3908 |
| PVX_119315 | -0.1644 | -0.4171 | -0.0473 | 0.413   | 0.8621  | 0.6632  | -0.0755 | -0.1819 | -0.044  |
| PVX_119690 | 0.6121  | 0.2804  | -0.1163 | -0.4316 | -0.4946 | -0.4827 | -0.3125 | 0.4377  | 0.8222  |
| PVX_082930 | 0.0627  | 0.3019  | 0.1687  | 0.0237  | -0.2143 | 0.3646  | 0.0786  | -0.1858 | -0.1679 |
| PVX_095340 | -0.3659 | 0.4966  | 0.6792  | 0.5672  | 0.2246  | -0.7291 | -1.1518 | -1.2717 | -1.3003 |
| PVX_123170 | 0.2191  | 0.3053  | 0.5986  | 0.427   | 0.262   | 0.2114  | -0.0122 | -0.1545 | 0.0692  |
| PVX_092160 | -0.4353 | -0.3087 | -0.3663 | -0.3337 | -0.0335 | -0.5667 | 0.7997  | 0.8017  | 0.1289  |
| PVX_083090 | 0.0158  | 0.4353  | 0.4022  | 0.2929  | 0.1822  | 0.4308  | 0.1978  | -0.4643 | -0.4194 |
| PVX_123450 | -0.1588 | 0.7704  | 0.8367  | 0.704   | -0.4852 | -0.99   | -0.8133 | -0.6706 | -0.5983 |
| PVX_100995 | -0.0818 | 0.0544  | 0.0431  | 0.0334  | 0.3065  | 0.4108  | 0.2061  | -0.1898 | -0.4823 |

|            |         |         |         |         |         |         |         |         |         |
|------------|---------|---------|---------|---------|---------|---------|---------|---------|---------|
| PVX_090265 | 0.9798  | 0.7858  | 0.5463  | 0.2916  | -0.0998 | -1.0783 | -1.2055 | -0.7408 | -0.5886 |
| PVX_081830 | 0.0218  | -0.1509 | -0.4566 | -0.627  | -0.5626 | -0.3794 | -0.1008 | -0.6326 | -0.7658 |
| PVX_098050 | -0.53   | -0.0839 | 0.0566  | 0.1251  | 0.4364  | 0.305   | 0.0924  | -0.4575 | -0.6784 |
| PVX_118480 | 0.3309  | -0.092  | -0.1646 | -0.1371 | -0.1263 | -0.8445 | -0.8102 | -0.5854 | -0.7719 |
| PVX_081600 | -0.5181 | -0.1054 | 0.2593  | 0.519   | 0.7516  | 0.4649  | -0.0817 | -0.3662 | -0.3422 |
| PVX_116690 | 0.094   | 0.4878  | 0.5677  | 0.6392  | 0.283   | 0.1688  | -0.5242 | -0.7815 | -0.6718 |
| PVX_080380 | -0.2077 | -0.378  | -0.1545 | 0.1719  | 0.6565  | 0.548   | 0.019   | -0.1573 | 0.0922  |
| PVX_114595 | 0.5586  | 0.1218  | -0.0612 | -0.3649 | -0.5494 | -0.1027 | 0.1106  | 0.4445  | 0.9176  |
| PVX_092805 | -0.0746 | 0.2227  | 0.2729  | 0.2758  | 0.425   | 0.4652  | -0.3714 | -0.9029 | -0.8871 |
| PVX_116590 | 0.1171  | 0.2779  | 0.0284  | 0.1074  | -0.3244 | 0.0201  | 0.3185  | -0.1025 | -0.5792 |
| PVX_114880 | 1.1153  | 0.6511  | 0.6852  | 0.6373  | 0.2201  | -0.4923 | -0.7916 | -0.9785 | -0.5076 |
| PVX_102630 | 0.5314  | 0.6375  | 0.2747  | 0.2825  | -0.0525 | -0.2846 | 0.0919  | 0.6323  | 1.3119  |
| PVX_118640 | -0.0481 | 0.3349  | 0.3053  | 0.6241  | 0.7158  | 0.4857  | -0.1194 | -0.193  | -0.1677 |
| PVX_084160 | 0.5699  | 0.0315  | -0.145  | -0.2749 | -0.4407 | -0.3432 | 0.4119  | 0.8277  | 0.9001  |
| PVX_084805 | 0.331   | 0.2885  | 0.4515  | 0.3985  | 0.1322  | -0.1634 | 0.1826  | -0.2179 | -0.6762 |
| PVX_124725 | 0.2761  | 0.3644  | 0.4073  | 0.3449  | -0.0794 | 0.0502  | -0.3362 | -0.509  | -0.4705 |
| PVX_091200 | 0.3127  | 0.4612  | 0.4776  | 0.4834  | 0.7385  | 0.1395  | -0.1008 | -0.426  | -0.4004 |
| PVX_084110 | 0.4446  | 0.3228  | 0.1742  | 0.3994  | 0.0573  | 0.0418  | 0.4588  | 0.3985  | 0.7299  |
| PVX_088795 | 0.9502  | 0.7353  | 0.5536  | 0.5524  | -0.2934 | -0.7141 | -0.3836 | -0.3319 | -0.0385 |
| PVX_095360 | -0.8989 | -1.0844 | -0.521  | -0.0486 | 0.3398  | 0.7948  | 1.0377  | 0.2044  | -0.4985 |
| PVX_118380 | -0.3305 | -0.0221 | 0.3423  | 0.519   | 0.396   | 0.0992  | -0.4005 | -0.3198 | 0.0367  |
| PVX_091425 | -0.625  | -0.4561 | -0.3074 | 0.0656  | 0.3946  | 0.7282  | 0.1874  | -0.4385 | -0.4005 |
| PVX_094850 | 0.1736  | 0.2058  | 0.1886  | 0.3847  | 0.0115  | -0.4958 | -0.851  | -0.4455 | -0.4381 |
| PVX_097705 | -1.1958 | -1.4957 | -1.6813 | -2.1186 | -2.2083 | -0.5312 | 1.591   | 1.3809  | 0.5766  |
| PVX_116830 | -0.1922 | 0.4719  | 0.6572  | 0.6582  | 0.5159  | 0.1501  | -0.3871 | -0.4603 | -0.4574 |
| PVX_085015 | 0.3355  | 0.4179  | 0.2949  | 0.2884  | 0.1796  | 0.073   | 0.2659  | 0.5006  | 0.5159  |
| PVX_092495 | 0.9315  | 0.0267  | 0.0585  | -0.1678 | -0.4561 | -0.2982 | 0.0744  | 0.6252  | 1.1747  |
| PVX_083575 | 0.0715  | 0.0412  | -0.0119 | 0.0708  | -0.1998 | -0.2855 | 0.0606  | -0.244  | 0.6576  |
| PVX_000575 | -0.7363 | -0.1272 | -0.1607 | -0.039  | 0.3713  | -0.2942 | 0.218   | 0.323   | 0.1035  |
| PVX_001950 | -0.1111 | 0.1303  | 0.1697  | 0.1009  | -0.0475 | -0.2505 | 0.435   | 0.7686  | 0.345   |
| PVX_091715 | -0.8756 | -0.7606 | -0.8972 | -0.3606 | 0.2996  | 1.0243  | 1.0782  | 0.2011  | -0.1568 |
| PVX_084510 | 0.6232  | 0.5354  | 0.196   | 0.2178  | 0.006   | 0.0899  | 0.7854  | 1.0866  | 1.1696  |
| PVX_123430 | 0.1366  | 0.1544  | -0.0026 | -0.0084 | -0.0765 | -0.2029 | 0.3264  | 0.0651  | 0.3588  |
| PVX_099645 | 0.1373  | -0.0377 | -0.1914 | -0.6345 | -0.5014 | -0.0256 | 0.7931  | 0.568   | 1.0218  |
| PVX_089015 | 0.8315  | 0.3401  | 0.2268  | -0.0307 | -0.0576 | -0.1739 | -0.1698 | -0.3266 | -0.1604 |
| PVX_085500 | -0.1528 | -0.1294 | -0.0804 | -0.0127 | 0.1916  | 0.2568  | 0.3078  | 0.4154  | 0.2977  |
| PVX_000705 | -0.0536 | 0.1195  | 0.3987  | 0.4087  | 0.2704  | 0.053   | -0.3067 | -0.0478 | 0.1953  |
| PVX_082570 | 0.262   | 0.37    | 0.1708  | 0.0949  | 0.0978  | -0.1073 | -0.7542 | -0.9666 | -0.8309 |
| PVX_092725 | 0.8969  | 0.6161  | 0.4244  | 0.5924  | 0.3121  | -0.4944 | -1.3153 | -1.3625 | -1.1191 |
| PVX_083240 | 0.4582  | -0.1947 | -0.7536 | -0.8474 | -1.2323 | -0.6472 | 0.1918  | 0.7021  | 0.9799  |
| PVX_092705 | 0.0425  | 0.0638  | 0.6055  | 0.5575  | -0.0188 | 0.3558  | -0.0791 | -0.0755 | 0.0715  |
| PVX_002860 | 0.0117  | -0.0964 | 0.2324  | 0.4752  | 0.359   | 0.1184  | 0.1957  | 0.0382  | -0.177  |
| PVX_082935 | 0.827   | 0.4036  | 0.2322  | 0.2382  | 0.0859  | -0.1271 | -0.4364 | -0.377  | -0.4782 |
| PVX_099885 | -0.1171 | -0.36   | -0.5414 | -0.2055 | 1.2918  | 0.5511  | -0.2628 | -0.219  | -0.1285 |
| PVX_095000 | -0.7472 | 0.7635  | 1.2401  | 0.9717  | -0.5977 | -0.68   | -0.6201 | -0.5148 | -0.7803 |
| PVX_114110 | -0.3144 | -0.6611 | -0.6472 | -0.7146 | -0.2863 | -0.2655 | 0.3172  | 0.1411  | -0.228  |
| PVX_087665 | 0.6139  | 0.525   | 0.4267  | -0.1134 | -0.5342 | -0.3856 | -0.2527 | -0.0452 | 0.3399  |
| PVX_089155 | -0.6894 | 0.2642  | 1.1898  | 1.2076  | 0.3684  | -0.0775 | -0.3131 | -0.3438 | -0.358  |
| PVX_113470 | 0.4238  | 0.1124  | -0.0914 | -0.2699 | -0.5177 | -0.1568 | 0.7432  | 0.7371  | 0.4621  |
| PVX_081395 | 0.2996  | 0.0796  | 0.0194  | -0.071  | -0.0669 | -0.2466 | 0.2266  | 0.7409  | 0.5045  |
| PVX_000625 | 1.2137  | 1.1317  | 1.0737  | 0.9025  | 0.4827  | -0.5262 | -0.7355 | -0.5293 | 0.1115  |
| PVX_003495 | 0.3425  | 0.3749  | 0.2423  | 0.5734  | 0.5695  | 0.2397  | 0.0418  | -0.1973 | -0.1115 |
| PVX_089845 | -0.021  | 0.0938  | -0.0394 | -0.2193 | -0.6679 | -0.8961 | -0.7222 | 1.2603  | 1.4431  |
| PVX_112655 | 0.6078  | 0.1666  | 0.0343  | -0.3752 | -0.7055 | -0.4859 | 0.4035  | 0.8305  | 0.6427  |
| PVX_001010 | 0.1132  | 0.069   | -0.0999 | -0.127  | -0.1614 | -0.2574 | 0.1881  | 0.6508  | 0.8182  |
| PVX_118270 | 0.0977  | 0.3445  | 0.115   | 0.0062  | -0.0254 | 0.0689  | 0.37    | 0.4466  | 0.8035  |
| PVX_098605 | -0.1703 | -0.1338 | -0.2464 | -0.2931 | -0.3327 | 0.5375  | 0.6857  | 0.0711  | 0.2404  |
| PVX_118305 | -1.4578 | -1.1078 | -0.8867 | -0.5863 | -0.9186 | -0.2196 | 1.0287  | 0.7967  | 0.0711  |
| PVX_119285 | -0.8529 | -0.8031 | -0.437  | -0.1926 | 0.2388  | 0.5349  | 0.482   | 0.2935  | 0.2196  |
| PVX_117260 | -0.2422 | 0.3542  | 0.7174  | 0.6191  | 0.3991  | 0.4556  | -0.0453 | -0.2627 | -0.09   |
| PVX_118035 | -0.7006 | -1.0085 | -1.1461 | -0.7711 | -0.0476 | 0.2077  | 0.5433  | 0.4973  | -0.0381 |
| PVX_092390 | -0.1044 | -0.1765 | 0.0048  | 0.4785  | 0.7183  | 0.3776  | -0.0099 | 0.1369  | 0.3221  |
| PVX_113530 | 0.2922  | 0.0937  | -0.1234 | 0.1736  | 0.7685  | 0.3705  | 0.0897  | 0.1833  | 0.414   |

|            |         |         |         |         |         |         |         |         |         |
|------------|---------|---------|---------|---------|---------|---------|---------|---------|---------|
| PVX_005065 | 0.2853  | -0.1492 | -0.2905 | -0.2569 | -0.382  | -0.7389 | -0.9356 | -0.9818 | -0.775  |
| PVX_099920 | -0.1602 | 0.0628  | -0.0879 | 0.1054  | 0.403   | 0.5736  | 0.4419  | 0.0954  | -0.1705 |
| PVX_088120 | -0.3218 | -0.2286 | 0.1798  | 0.2206  | 0.2699  | 0.7106  | 0.3189  | -0.1142 | -0.199  |
| PVX_094775 | -0.375  | 0.087   | 0.5313  | 0.6507  | 0.412   | -0.3287 | -0.2041 | 0.1956  | 0.0541  |
| PVX_097585 | 1.3427  | 0.3706  | 0.249   | 0.0608  | -0.3012 | -0.1177 | -0.1533 | 0.6762  | 0.8935  |
| PVX_091330 | 0.7081  | 0.5448  | 0.4345  | 0.3146  | 0.038   | 0.1022  | 0.4621  | 0.1993  | -0.0752 |
| PVX_080375 | 1.2122  | 0.6959  | 0.1536  | -0.0541 | -0.2233 | -0.3303 | 0.2923  | 1.212   | 1.5437  |
| PVX_066190 | 1.2134  | 0.5109  | 0.2183  | 0.0565  | -0.1107 | -0.5471 | -0.4492 | 0.616   | 0.4896  |
| PVX_122740 | 0.5483  | -0.302  | -0.4295 | -0.3448 | 0.1717  | 0.3703  | 0.4708  | 0.3935  | 0.5455  |
| PVX_114730 | 0.1518  | 0.2335  | 0.1355  | -0.1198 | 0.1886  | 0.4252  | 0.4534  | 0.1304  | 0.3042  |
| PVX_079945 | 0.0369  | 0.2801  | 0.2946  | 0.1655  | 0       | -0.4351 | -0.1176 | 0.2703  | 0.7739  |
| PVX_114295 | 0.2922  | 0.387   | 0.2948  | 0.2958  | 0.1365  | 0.4253  | 0.5171  | -0.0405 | -0.2121 |
| PVX_123955 | 0.0633  | 0.295   | 0.4975  | 0.616   | 0.5207  | 0.306   | -0.1772 | -0.1788 | -0.1261 |
| PVX_114470 | 0.3274  | 0.1198  | 0.1414  | -0.0525 | -0.0901 | -0.1904 | 0.2267  | 0.1107  | -0.2228 |
| PVX_091560 | 0.2291  | 0.1578  | 0.2187  | -0.0769 | -0.3991 | -0.5097 | -0.8411 | -0.7187 | -0.976  |
| PVX_099940 | 0.3108  | 0.2442  | 0       | -0.6086 | -1.0195 | -0.8754 | -0.5039 | 0.3598  | 0.9925  |
| PVX_117040 | -0.3443 | 0.0538  | -0.0767 | -0.2018 | 0.0493  | 0.3488  | 0.2513  | -0.2887 | -0.4655 |
| PVX_096960 | 0.9741  | 0.3088  | 0.0499  | 0.5387  | -0.163  | 0.2851  | 0.2479  | 0.0885  | 0.6824  |
| PVX_121865 | 1.4155  | 0.1866  | -0.0963 | -0.4415 | -0.695  | -0.5774 | -0.6422 | -0.3391 | -0.0109 |
| PVX_121950 | 0.3107  | 0.2129  | 0.1225  | 0.3596  | 0.1966  | 0.2483  | 0.4993  | 0.664   | 0.7511  |
| PVX_100710 | -0.1728 | -0.1911 | -0.1578 | -0.2226 | -0.3243 | -0.0173 | 1.2612  | 1.0467  | 0.6307  |
| PVX_089430 | 1.0909  | 0.686   | 0.6289  | 0.412   | 0.1377  | -0.2195 | -0.7823 | -0.7181 | -0.5275 |
| PVX_124140 | -0.8928 | -0.7545 | -0.3947 | -0.0846 | 0.208   | 0.333   | 0.4543  | 0.2814  | -0.1621 |
| PVX_122875 | -0.319  | 0.4927  | 0.6403  | 0.6795  | 0.5001  | 0.4076  | 0.0201  | -0.2286 | -0.3991 |
| PVX_122220 | -0.4043 | 0.2496  | 0.6444  | 0.5018  | 0.3997  | -0.0712 | -1.0415 | -1.1917 | -1.1454 |
| PVX_097530 | 0.3125  | 0.4536  | 0.3388  | 0.1239  | 0.34    | -0.0349 | 0.292   | -0.149  | 0.0928  |
| PVX_095040 | 0.4163  | 0.4695  | 0.3169  | 0.2398  | 0.1951  | 0.0815  | 0.0589  | -0.1585 | -0.2042 |
| PVX_112105 | -1.4917 | -2.0007 | -2.4694 | -3.0657 | -1.8355 | 1.2211  | 0.9155  | -0.3538 | -0.8963 |
| PVX_080700 | 0.9793  | 0.1166  | 0.0925  | -0.1863 | -0.3216 | -0.1135 | 0.0788  | 0.7164  | 1.4724  |
| PVX_084530 | 0.1587  | 0.0735  | -0.1901 | -0.1194 | 0.32    | 0.402   | 0.4004  | 0.3447  | 0.3694  |
| PVX_000890 | -0.254  | -0.2575 | 0.1863  | 0.6435  | 0.6371  | 0.2744  | -0.1012 | -0.2987 | -0.4327 |
| PVX_094440 | -0.4758 | -0.4314 | -0.0407 | 0.1882  | 0.337   | 0.22    | 0.1857  | -0.0447 | -0.008  |
| PVX_087975 | -0.048  | -0.1237 | 0.0529  | 0.4048  | 0.6147  | 0.5142  | 0       | 0.1323  | -0.0182 |
| PVX_114630 | -0.4226 | -0.2937 | -0.2391 | -0.0871 | 0.2242  | 0.4275  | 0.432   | -0.1259 | -0.4661 |
| PVX_089040 | -0.1882 | -0.4491 | -0.0311 | 0.4055  | 0.9195  | 0.8238  | 0.2789  | -0.1033 | 0.0854  |
| PVX_122515 | 0.0332  | 0.341   | 0.5057  | 0.4967  | 0.4695  | 0.3633  | -0.2959 | -0.4016 | -0.156  |
| PVX_084300 | -0.6893 | 0.0894  | 0.1484  | 0.3033  | 0.3133  | 0.6372  | 0.1506  | -0.4911 | -0.6072 |
| PVX_002850 | -0.3904 | 0.0524  | 0.2586  | 0.3942  | 0.6706  | 0.0252  | -0.4534 | -0.2629 | -0.3326 |
| PVX_086180 | -0.2757 | -0.0269 | 0.3199  | 0.2703  | 0.0891  | 0.5013  | 0.5182  | 0.0056  | -0.2958 |
| PVX_094900 | -0.2886 | -0.57   | -0.6353 | 0.0582  | 0.5201  | 0.6333  | 0.1342  | -0.0835 | -0.1039 |
| PVX_091945 | -1.0204 | -0.1146 | -0.0134 | -0.0361 | -0.1028 | -0.3704 | -0.3795 | 0.375   | 0.8038  |
| PVX_001790 | 1.0155  | 1.0123  | 1.0017  | 0.4951  | 0.0918  | 0.1506  | -0.1028 | -0.3399 | -0.2659 |
| PVX_095475 | 0.0075  | 0.3738  | 0.2838  | 0.1137  | 0.1648  | 0.1597  | 0.2881  | 0.2056  | -0.0166 |
| PVX_096270 | 0.4178  | 0.511   | 0.4031  | 0.2701  | 0.5275  | 0.4986  | 0.4457  | 0.1259  | 0.084   |
| PVX_113230 | 0.7724  | 0.6506  | 0.3441  | -0.1499 | -0.6707 | -0.5349 | -0.5831 | 0.5039  | 0.7815  |
| PVX_092320 | 0.9822  | 0.4097  | 0.4163  | 0.2474  | 0.2448  | -0.0925 | -0.5931 | -0.708  | -0.3113 |
| PVX_091395 | 0.7724  | 0.4633  | 0.1764  | -0.4301 | -0.7346 | -0.6612 | -0.1863 | 0.5805  | 1.4566  |
| PVX_105200 | -0.9756 | -0.4966 | -0.5807 | -0.7311 | -1.1507 | -0.3533 | 0.3233  | -0.2622 | -0.4987 |
| PVX_124075 | 0.3705  | 0.2178  | 0.5117  | 0.6939  | 0.5131  | 0.474   | 0.1561  | 0.3188  | 0.6492  |
| PVX_000865 | 0.3545  | 0.0601  | 0.0522  | 0.2042  | 0.1317  | 0.2155  | 0.2711  | 0.5136  | 0.6207  |
| PVX_090240 | -0.7429 | -1.0437 | -1.2433 | -1.1717 | 0.1462  | 0.2494  | -0.101  | 1.0126  | 0.6923  |
| PVX_117370 | 0.7334  | 0.3597  | 0.0173  | -0.3094 | -0.5318 | -0.418  | 0.0693  | 0.6342  | 1.2711  |
| PVX_114940 | -0.1331 | 0.0796  | 0.2698  | 0.3904  | 0.0907  | 0.3425  | 0.6775  | 0.3604  | -0.2623 |
| PVX_084410 | 0.3658  | -0.1817 | -0.4889 | -0.7522 | -0.6647 | 0.2806  | 0.7287  | 0.6929  | 0.7258  |
| PVX_081705 | 0.4369  | 0.4254  | 0.6412  | 0.5325  | 0.675   | 0.3301  | -0.4276 | -1.3044 | -1.4101 |
| PVX_115990 | -0.1171 | -0.1892 | -0.3763 | -0.2808 | -0.3003 | -0.3338 | -0.4119 | -0.3567 | -0.2845 |
| PVX_086885 | 0.3243  | 0.3294  | 0.2239  | -0.0641 | -0.4114 | -0.4114 | 0.0026  | -0.0994 | 0.5005  |
| PVX_085700 | -0.2441 | -0.637  | -0.607  | -0.3337 | 0.0792  | 0.703   | 0.2883  | 0.0882  | -0.0312 |
| PVX_003875 | 0.3684  | 0.2946  | 0.4653  | 0.6527  | 0.5371  | 0.4112  | 0.4908  | 0.4755  | 0.2449  |
| PVX_119295 | -0.6646 | -0.9917 | -1.4251 | -1.518  | -0.9732 | 0.4678  | 1.0558  | 0.5179  | 0.0606  |
| PVX_101165 | 0.4024  | 0.5101  | 0.6623  | 0.8306  | 0.4091  | -0.0667 | -0.5803 | -0.6465 | -0.4864 |
| PVX_096970 | 1.2107  | 0.5954  | 0.1265  | -0.127  | -0.2852 | -0.4548 | -0.1895 | -0.1793 | -0.1793 |
| PVX_122695 | -0.5403 | 0.0181  | 0.2063  | 0.3605  | 0.5266  | 0.4084  | -0.433  | -0.8395 | -0.9546 |

|            |         |         |         |         |         |         |         |         |         |
|------------|---------|---------|---------|---------|---------|---------|---------|---------|---------|
| PVX_114625 | 0.8086  | 0.8961  | 0.8711  | 0.8142  | 0.3506  | -0.3375 | -0.8522 | -0.834  | -0.7993 |
| PVX_084185 | 1.5155  | 0.6505  | 0.4767  | -0.247  | -0.8759 | -1.107  | -0.8202 | 0.0907  | 1.0258  |
| PVX_090975 | 0.6542  | 0.5587  | 0.3661  | 0.1845  | 0.3029  | 0.2285  | 0.2784  | 0.2023  | 0.227   |
| PVX_088955 | 0.7424  | 0.6793  | 0.2954  | -0.1409 | -0.4955 | -0.4299 | -0.0738 | 0.7142  | 1.4591  |
| PVX_095370 | -0.254  | -0.1938 | -0.4843 | -0.4705 | 0.0951  | 0.6544  | 0.8769  | 0.278   | -0.0303 |
| PVX_088205 | -0.0545 | 0.0935  | 0.0015  | 0.0259  | 0.158   | 0.3088  | 0.6557  | 0.4542  | 0.079   |
| PVX_082545 | -0.3622 | -0.066  | 0.481   | 0.5581  | 0.6954  | -0.0281 | -0.4233 | -0.5793 | -0.6646 |
| PVX_096215 | 0.838   | 0.442   | 0.2338  | -0.2815 | -0.1408 | -0.336  | -0.1    | 0.3665  | 0.9929  |
| PVX_091795 | -0.7828 | -0.3665 | -0.1316 | 0.1352  | 0.0741  | -0.7857 | -1.0892 | -1.3802 | -1.6007 |
| PVX_111375 | -0.2492 | -0.2981 | -0.2446 | 0.2423  | 0.5042  | 0.0235  | -0.1235 | -0.3068 | -0.4076 |
| PVX_114540 | -0.3283 | 0.2126  | 0.9262  | 0.9142  | 0.833   | 0.5043  | 0.0525  | -0.3155 | -0.3663 |
| PVX_067690 | 0.2609  | -0.0796 | 0.1154  | 0       | -0.0827 | 0.0695  | -0.0271 | 0.1871  | 0.3778  |
| PVX_111340 | -1.7067 | -1.8819 | -1.9662 | -2.1677 | -2.1347 | -2.0349 | 0.5674  | 1.5716  | 0.4781  |
| PVX_123010 | 0.0361  | 0.4482  | 0.5463  | 0.6624  | 0.4251  | 0.3936  | 0.0504  | -0.7177 | -0.7927 |
| PVX_117825 | 0.0194  | -0.3467 | -0.6548 | -0.5998 | 0.2049  | 0.4924  | 0.2139  | 0.1343  | 0.2848  |
| PVX_093630 | -0.5917 | -0.6263 | -0.096  | 0.0637  | 0.1594  | -0.2861 | -1.2056 | -1.2797 | -0.9016 |
| PVX_117440 | 0.2236  | 0.5401  | 0.7046  | 0.4434  | 0.2708  | 0.279   | -0.3999 | -1.2008 | -1.109  |
| PVX_081735 | -0.825  | -1.003  | -1.2644 | -1.6574 | -1.6354 | -0.1374 | 1.4819  | 1.4213  | 0.5992  |
| PVX_085625 | -0.6091 | -0.1203 | 0.6588  | 0.9262  | 0.7067  | 0.0918  | -0.5016 | -0.2637 | -0.1884 |
| PVX_093570 | -0.2389 | 0.1489  | 0.1967  | 0.0421  | 0.0229  | -0.2714 | -0.028  | 0.8254  | 0.5854  |
| PVX_080460 | -0.4796 | -0.6021 | -1.1367 | -1.5633 | -1.843  | -0.8344 | 0.8313  | 1.0026  | 0.7694  |
| PVX_084565 | 0.5631  | 0.2164  | 0.0312  | -0.1528 | 0.0397  | -0.3705 | -0.5617 | 0.0796  | 0.2258  |
| PVX_003555 | 1.7014  | 0.7077  | 0.1249  | -0.4052 | -1.2367 | -1.7386 | -1.8773 | -0.9134 | 0.3382  |
| PVX_099195 | -0.0494 | -0.073  | 0.4143  | 0.5286  | 0.4041  | -0.1259 | -0.2948 | -0.1107 | -0.0901 |
| PVX_092590 | -0.648  | -0.0737 | 0.1902  | 0.3662  | 0.5141  | 0.6052  | 0.0002  | -0.2192 | -0.3579 |
| PVX_119765 | 0.2967  | 0.3394  | 0.5006  | 0.7198  | 0.6164  | 0.2918  | 0.3934  | 0.1697  | 0.1545  |
| PVX_118530 | 0.8471  | -0.1419 | -0.2454 | -0.2366 | 1.4464  | 0.8994  | -0.2911 | -0.3473 | 0.0574  |
| PVX_098890 | 0.1847  | -0.1256 | 0.1116  | 0.103   | 0.4425  | 0.6948  | 0.49    | 0.4004  | 0.597   |
| PVX_084705 | -0.2274 | -0.5248 | -0.7387 | -0.8813 | -0.2592 | 0.6412  | 1.2009  | 0.705   | 0.3949  |
| PVX_096365 | 0.1361  | -0.1316 | -0.2693 | -0.2081 | 0.1553  | -0.0074 | -0.0282 | -0.1682 | -0.3207 |
| PVX_080360 | -0.141  | -0.2311 | -0.089  | 0.062   | 0.6549  | 1.0842  | 0.9619  | 0.4693  | 0.2634  |
| PVX_114190 | 0.7539  | 0.5377  | 0.2182  | -0.4877 | -0.8171 | -0.8689 | -0.4294 | 0.3379  | 1.4319  |
| PVX_101115 | -0.6605 | -0.7239 | -0.1679 | 0.2318  | 0.3119  | 0.036   | -0.8156 | -0.6225 | 0.0442  |
| PVX_085205 | 0.3497  | 0.2356  | 0.2332  | 0.284   | -0.3301 | -0.8545 | 0.0676  | 0.3748  | 0.6508  |
| PVX_103660 | 1.1293  | 1.1688  | 0.8575  | 0.8285  | 0.2958  | -0.1432 | -0.3036 | -0.6567 | -0.4122 |
| PVX_089480 | -0.1094 | -0.117  | -0.1385 | -0.2584 | 0.0312  | 0.9674  | 0.8003  | 0.1728  | 0.3735  |
| PVX_098910 | 0.2705  | -0.19   | -0.2735 | -0.2885 | -0.2789 | -0.0284 | -0.3253 | -0.9864 | -0.8016 |
| PVX_094790 | -0.578  | -0.0985 | 0.1368  | 0.3941  | 0.9127  | 0.9516  | -0.1267 | -0.8089 | -0.7799 |
| PVX_003870 | 0.0652  | 0.4881  | 0.5921  | 0.6944  | 0.6809  | -0.1483 | -0.2039 | -0.3117 | -0.0687 |
| PVX_111120 | 0.4074  | 0.4261  | 0.3779  | 0.4475  | 0.3314  | 0.1224  | 0.0545  | 0.5012  | 0.4347  |
| PVX_114720 | 0.1605  | -0.1386 | -0.147  | -0.2386 | -0.0367 | -0.0351 | 0.071   | 0.2919  | 0.3481  |
| PVX_118580 | 0.0762  | 0.2471  | 0.283   | 0.4619  | 0.5723  | 0.7537  | 0.7821  | -0.0055 | -0.5423 |
| PVX_003955 | -0.0837 | 0.0888  | 0.2694  | 0.263   | 0.118   | 0.1683  | -0.3805 | -0.9639 | -0.9337 |
| PVX_094720 | -0.2873 | -0.073  | 0.2528  | 0.7341  | 0.4884  | 0.4316  | -0.2929 | -0.3982 | -0.5455 |
| PVX_114310 | 0.0749  | -0.2161 | -0.2803 | -0.0211 | 0.0644  | 0.0733  | 0.1264  | 0.1377  | 0.294   |
| PVX_002710 | -0.7703 | -0.6376 | -0.6435 | -0.6373 | -0.1699 | -0.0268 | 0.0638  | 0.3881  | 0.0589  |
| PVX_117920 | 0.05    | -0.0114 | -0.0805 | -0.2218 | -0.414  | -1.0198 | -0.9743 | -0.1438 | 0.2771  |
| PVX_097860 | 0.618   | 0.6225  | 0.493   | 0.3345  | 0.1328  | -0.0869 | -0.7689 | -0.518  | -0.7248 |
| PVX_101455 | -0.2357 | -0.3177 | 0.1544  | 0.4321  | 0.4992  | -0.1063 | -0.4012 | 0.1834  | 0.3898  |
| PVX_117450 | 0.482   | 0.2286  | 0.3944  | 0.5476  | 0.7934  | 0.4177  | -0.1238 | -0.0882 | 0.0569  |
| PVX_114955 | -0.0736 | -0.1969 | -0.3073 | -0.4195 | -0.4332 | 0.62    | 0.8781  | 0.4898  | 0.4042  |
| PVX_116735 | 0.1045  | -0.193  | 0.004   | 0.1123  | 0.1674  | -0.0633 | -0.2303 | 0.1377  | -0.2726 |
| PVX_118060 | 0.457   | 0.2159  | 0.1494  | 0.1542  | 0.0319  | 0.1624  | -0.2875 | -0.4036 | -0.2751 |
| PVX_091670 | 0.5033  | 0.1234  | -0.36   | -0.6319 | -0.366  | -0.8755 | 0.1604  | 0.6209  | 0.7653  |
| PVX_094705 | -0.2479 | 0.0717  | 0.1808  | 0.1302  | 0.172   | -0.0406 | -0.228  | -0.5649 | -0.648  |
| PVX_117190 | 0.8596  | 0.1049  | -0.3302 | -0.545  | -0.6648 | -0.2571 | 0.809   | 1.5748  | 1.7276  |
| PVX_122840 | 0.0428  | -0.2581 | -0.2376 | -0.3    | -0.2676 | -0.7054 | 0.0054  | 0.551   | 0.5231  |
| PVX_113385 | 0.4422  | 0.1772  | -0.0738 | -0.4389 | -0.5023 | -0.4329 | -0.1074 | 0.425   | 0.8598  |
| PVX_101225 | 0.2076  | 0.3433  | 0.383   | 0.173   | 0.0941  | 0.1609  | 0.0962  | 0.0668  | 0.1648  |
| PVX_124115 | 0.3411  | -0.0421 | -0.1281 | -0.0184 | 0.0146  | 0.0588  | 0.6197  | 0.8329  | 0.8529  |
| PVX_122815 | -0.5225 | -0.0063 | 0.1976  | 0.2462  | 0.3569  | 0.2896  | -0.1029 | -0.3453 | 0.0345  |
| PVX_096385 | 0.4178  | 0.4707  | 0.4521  | 0.3896  | 0.2699  | 0.3772  | 0.3087  | 0.214   | 0.3488  |
| PVX_085005 | -0.7422 | -0.319  | 0.2954  | 0.6214  | 0.9695  | 0.5368  | -0.4387 | -0.6789 | -0.4679 |



|            |         |         |         |         |         |         |         |         |         |
|------------|---------|---------|---------|---------|---------|---------|---------|---------|---------|
| PVX_113670 | -1.1376 | -0.1512 | 1.0179  | 0.8783  | 0.2114  | -0.9469 | -0.9693 | -1.189  | -1.1133 |
| PVX_003935 | -0.1118 | 0.0432  | 0.0362  | -0.1677 | -0.0932 | 0.7397  | 0.8076  | 0.2211  | -0.1068 |
| PVX_083515 | 0.2438  | 0.0666  | -0.2012 | -0.0228 | -0.4835 | 0.14    | -0.5569 | -0.6394 | -0.2786 |
| PVX_117065 | -0.4799 | -0.2801 | -0.0106 | 0.1985  | 0.1144  | 0.2855  | 0.5429  | 0.3692  | 0.1614  |
| PVX_110905 | 0.2961  | 0.4337  | 0.5409  | 0.2329  | 0.298   | 0.3488  | -0.1978 | -0.3672 | -0.3467 |
| PVX_115110 | -0.3334 | -0.0187 | 0.134   | 0.2139  | 0.1377  | 0.1823  | -0.0779 | -0.264  | -0.4208 |
| PVX_088785 | 0.5296  | 0.4875  | 0.3535  | 0.1216  | 0.4102  | 0.1832  | 0.5749  | 0.3137  | 0.412   |
| PVX_097815 | -0.3702 | -0.1757 | 0.049   | 0.2834  | 0.5893  | 0.2112  | -0.107  | -0.1883 | -0.3459 |
| PVX_080680 | 0.7922  | 0.2907  | -0.327  | -0.8844 | -0.9298 | -0.8928 | -0.3007 | 0.3938  | 1.3829  |
| PVX_092610 | 0.1057  | -0.1166 | 0.0351  | 0.2885  | 0.1933  | -0.5895 | -0.2553 | 0.2547  | 0.8018  |
| PVX_001690 | -0.4118 | 0.0753  | -0.3646 | -0.8267 | -0.6969 | -0.7096 | -0.4654 | 1.0794  | 1.0089  |
| PVX_081595 | -1.3382 | -0.3783 | 0.0176  | 0.8019  | 0.7821  | 1.0578  | -0.5459 | -1.4805 | -1.6457 |
| PVX_082440 | -0.288  | 0.1904  | 0.3191  | 0.3277  | -0.0578 | 0.0743  | -0.2847 | -0.2059 | -0.176  |
| PVX_080335 | 0.0179  | -0.1411 | -0.2768 | -0.5546 | 0.0063  | 0.5104  | 0.2439  | -0.0744 | 0.0575  |
| PVX_003750 | -0.4437 | -0.2167 | 0.3419  | 0.5736  | 0.5935  | -0.193  | -0.4574 | -0.3404 | -0.5974 |
| PVX_095155 | -0.5963 | -0.0321 | 0.0192  | 0.0738  | 0.0235  | -0.1322 | 0.3056  | -0.092  | -0.4335 |
| PVX_080575 | -1.0246 | 0.677   | 1.3066  | 1.4275  | 0.667   | -1.2663 | -1.7366 | -1.6776 | -1.4593 |
| PVX_111590 | 1.3881  | 0.5803  | 0.3474  | 0.3073  | 0.0678  | 0.2393  | 0.4647  | 0.7043  | 0.5411  |
| PVX_118520 | -0.1552 | -0.5119 | -0.3545 | -0.1347 | 0.3247  | 0.888   | 0.7785  | 0.3405  | 0.0501  |
| PVX_123405 | 0.1573  | 0.5913  | 0.8243  | 0.8922  | 0.298   | -0.0804 | -0.6721 | -0.8283 | -0.7043 |
| PVX_117000 | 0.4745  | 0.4176  | 0.7037  | 0.6754  | 0.5379  | 0.0796  | -0.9839 | -1.1449 | -0.8611 |
| PVX_087120 | -0.1678 | -0.3198 | -0.4093 | 0.0336  | 0.8894  | 0.9876  | 0.2267  | 0.2352  | 0.1123  |
| PVX_122205 | 1.1048  | 0.1219  | 0.0233  | -0.1509 | -0.3068 | -0.3911 | 0.2263  | 1.1009  | 1.387   |
| PVX_099430 | 0.7462  | 0.4879  | 0.3267  | 0.0453  | -0.8112 | -0.1259 | -0.0136 | 0.8447  | 1.2799  |
| PVX_094365 | 1.1343  | 1.1991  | 0.7784  | 0.7052  | -0.3714 | -0.2158 | -0.3654 | 0.3059  | 0.6213  |
| PVX_090865 | -0.1693 | -0.1136 | -0.0209 | -0.0468 | 0.0433  | -0.1015 | -0.1983 | -0.8346 | -0.743  |
| PVX_095405 | 0.3535  | 0.3524  | 0.2397  | -0.002  | -0.6613 | -0.7438 | -0.6353 | -0.0432 | 0.2895  |
| PVX_094255 | -1.2788 | -1.3613 | -1.3656 | -1.5131 | -1.7135 | -1.3408 | -0.0211 | 1.4314  | 1.1593  |
| PVX_121355 | -0.3263 | -0.3924 | -0.345  | -0.3175 | -0.4602 | -0.2239 | -0.235  | -0.277  | -0.0047 |
| PVX_123195 | 0.5741  | 0.9424  | 0.8453  | 0.6993  | 0.1315  | -0.3854 | -0.4991 | -0.5159 | -0.4935 |
| PVX_082610 | 0.5653  | 0.4825  | 0.734   | 0.7275  | 0.7644  | 0.2757  | 0.0821  | 0.1653  | 0.0798  |
| PVX_117835 | 0.6286  | 0.0821  | -0.3489 | -0.3541 | -0.1064 | -0.0779 | 0.0912  | 0.842   | 1.0228  |
| PVX_098810 | 0.1835  | 0.3879  | 0.3425  | 0.3717  | 0.5369  | 0.3734  | 0.1203  | -0.1815 | -0.2154 |
| PVX_080425 | 0.2918  | -0.0006 | -0.3028 | -0.8285 | -1.2018 | -1.0963 | -0.7598 | 0.0172  | 0.8325  |
| PVX_090150 | 0.9366  | 0.6861  | 0.7909  | 0.538   | 0.3709  | 0.0394  | -0.3803 | -0.3303 | -0.2411 |
| PVX_123485 | 0.2969  | 0.273   | 0.4362  | 0.4147  | 0.3825  | -0.2381 | -0.2768 | -0.0255 | 0.4005  |
| PVX_086980 | 0.3154  | 0.1893  | 0.2407  | -0.0592 | -0.4916 | -0.1761 | 0.2692  | 0.4715  | 0.1926  |
| PVX_085710 | 0.5026  | 0.734   | 0.8318  | 0.7496  | 0.7026  | 0.1616  | -0.5342 | -0.7103 | -0.7217 |
| PVX_084250 | -0.335  | -0.0205 | 0.3292  | 0.5927  | 0.5158  | -0.1123 | -0.1026 | 0.3228  | 0.5526  |
| PVX_084330 | 0.2452  | 0.1282  | 0.0046  | 0.0681  | 0.0108  | -0.4368 | 0.3077  | 0.5711  | 0.124   |
| PVX_091370 | 0.4894  | 0.0983  | -0.1076 | 0.0546  | -0.0594 | -0.2301 | 0.276   | 0.8     | 0.6559  |
| PVX_094950 | -0.1934 | -0.0589 | 0.1847  | 0.1024  | 0.13    | -0.2724 | -0.4486 | 0.3347  | 0.4819  |
| PVX_119655 | 0.432   | 0.4508  | 0.2496  | 0.2622  | 0.267   | 0.4359  | 0.3313  | 0.5503  | 0.5872  |
| PVX_094535 | 0.2726  | 0.3818  | 0.3052  | 0.0686  | -0.0039 | -0.3684 | -1.1871 | -1.6246 | -1.5379 |
| PVX_001660 | 2.0649  | 1.5152  | 0.451   | -0.1512 | -0.4374 | -0.4617 | -0.4584 | -0.0301 | 0.6211  |
| PVX_083190 | 0.1706  | 0.3942  | 0.5558  | 0.4923  | 0.4878  | 0.1817  | -0.1403 | -0.1867 | -0.1475 |
| PVX_083555 | -0.2283 | 0.4142  | 0       | 0.0815  | 0.0815  | 0       | -0.2069 | -1.2512 | -1.1048 |
| PVX_090210 | -2.102  | -2.1995 | -2.5262 | -2.6303 | -2.6697 | -2.4268 | 1.5641  | 1.5369  | 0.2127  |
| PVX_088200 | 0.1476  | 0.2493  | 0.3476  | 0.2538  | 0.3387  | 0.4508  | -0.1886 | -0.3128 | -0.1473 |
| PVX_081715 | -0.1919 | -0.1735 | 0.2775  | 0.4857  | 0.4399  | 0.4376  | 0.0468  | 0.0038  | 0.1534  |
| PVX_099130 | 0.2679  | 0.1924  | -0.031  | -0.2239 | -0.3714 | -0.1276 | 0.4397  | 1.0967  | 0.8539  |
| PVX_090170 | 0.078   | -0.1188 | -0.2958 | -0.0853 | 0.315   | 0.5903  | 0.3232  | 0.1994  | -0.1515 |
| PVX_095395 | 0.1274  | 0.1359  | 0.2146  | 0.4293  | 0.2778  | 0.2542  | -0.5522 | -1.0431 | -1.1523 |
| PVX_092010 | 0.4385  | 0.0021  | -0.2133 | -0.2713 | -0.2429 | -0.2167 | 0.0984  | 0.32    | -0.1527 |
| PVX_095495 | -1.4215 | -1.4192 | -1.4159 | -1.5891 | -1.6744 | -0.9545 | 1.0103  | 0.6965  | 0.0427  |
| PVX_099590 | -0.3301 | -0.5123 | -0.1421 | 0.2896  | 0.4128  | 0.3657  | 0.084   | -0.0669 | -0.0267 |
| PVX_101240 | 0.1799  | -0.0057 | -0.3371 | -0.2624 | 0.4475  | 0.3618  | 0.334   | 0.2122  | 0.4315  |
| PVX_084480 | 0.3454  | 0.3494  | 0.3566  | 0.4044  | -0.1076 | -0.1361 | -0.6063 | -0.7046 | -0.5622 |
| PVX_002675 | -0.6146 | -0.1057 | -0.1189 | -0.0218 | 0.2045  | 0.1476  | 0.1927  | -0.0195 | -0.1665 |
| PVX_116785 | 0.8171  | 0.7303  | 0.759   | 0.6299  | 0.6605  | 0.4258  | -0.0134 | -0.5119 | -0.3065 |
| PVX_088060 | -0.3865 | 0.1829  | 0.6728  | 0.7341  | 0.4166  | 0.2587  | -0.3584 | -0.5644 | -0.6356 |
| PVX_101375 | 0.1297  | -0.0849 | -0.2786 | 0.485   | 0.2694  | 0.5019  | 0.7086  | 0.6908  | 0.654   |
| PVX_088840 | -0.3431 | 0.1465  | -0.0562 | -0.5626 | -0.8486 | -0.9963 | -0.6318 | 1.0672  | 0.8473  |

|            |         |         |         |         |         |         |         |         |         |
|------------|---------|---------|---------|---------|---------|---------|---------|---------|---------|
| PVX_100940 | -0.4358 | -0.7487 | -1.0256 | -0.9932 | -0.1289 | 0.5062  | 0.5594  | 0.2196  | 0.0369  |
| PVX_061190 | 0.0694  | -0.1357 | -0.2077 | -0.6386 | -0.2855 | -0.3022 | -0.4958 | -0.4346 | -0.491  |
| PVX_118165 | 0.306   | -0.1698 | 0.1341  | -0.1836 | 0.276   | 0.4343  | 0.101   | -0.502  | -0.4127 |
| PVX_116605 | 0.5069  | -0.0395 | -0.3259 | -0.3775 | -0.1563 | -0.3036 | -0.2514 | -0.046  | -0.0322 |
| PVX_092370 | -0.7153 | -0.6383 | -1.0734 | -1.219  | -0.4187 | 0.4992  | 0.9366  | 0.4451  | -0.0452 |
| PVX_099370 | -0.5707 | -0.1836 | -0.2144 | -0.0951 | -0.1517 | 0.448   | 0.3755  | -0.2218 | -0.5849 |
| PVX_117205 | 0.4619  | 0.0143  | -0.1594 | -0.0454 | -0.3881 | -0.3152 | -0.6869 | -0.766  | -0.4341 |
| PVX_123030 | -0.2467 | 0.1957  | 0.2416  | 0.216   | 0.223   | 0.0194  | -0.5013 | -0.4091 | -0.0745 |
| PVX_084345 | 0.0873  | -0.0298 | 0.0757  | 0.0464  | 0.4132  | -0.169  | -0.9698 | -1.1696 | -1.2153 |
| PVX_099870 | 0.133   | 0.6268  | 0.5636  | 0.5191  | 0.2975  | -0.0218 | 0.3404  | 0.2779  | 0.2907  |
| PVX_122590 | 0.2489  | 0.0312  | 0.0713  | 0.1165  | 0.2633  | 0.2275  | 0.2739  | 0.0055  | -0.0253 |
| PVX_123520 | 0.6029  | 0.3265  | 0.1716  | 0.1116  | 0.136   | 0.0907  | -0.724  | -0.7714 | -0.5674 |
| PVX_119370 | -0.2138 | -0.0795 | 0.1263  | 0.2133  | 0.4875  | 0.3011  | -0.157  | -0.3946 | -0.163  |
| PVX_116875 | 0.4007  | 0.5258  | 0.2244  | 0.0083  | -0.0954 | 0.1701  | 0.1756  | -0.6117 | -0.4943 |
| PVX_115260 | -0.0431 | 0.2283  | 0.0682  | 0.0637  | -0.0291 | 0.1425  | 0.1733  | -0.1505 | -0.2452 |
| PVX_117485 | 0.169   | 0.1107  | 0.3562  | 0.512   | 0.4645  | 0.3386  | 0.1378  | 0.1782  | 0.2099  |
| PVX_084780 | 0.1293  | -0.3842 | -0.0776 | 0.2649  | 0.3079  | -0.0561 | -0.1951 | 0.2822  | 0.5466  |
| PVX_097980 | 0.4745  | -0.3383 | -0.9295 | -1.3392 | -1.304  | -1.0536 | -0.2536 | 0.6535  | 0.9458  |
| PVX_089705 | -0.3907 | -0.1543 | -0.1486 | -0.2545 | -0.3491 | 0.2273  | 0.6748  | 0.1383  | -0.2619 |
| PVX_115195 | 0.4569  | 0.4442  | 0.3458  | 0.556   | 0.5388  | 0.5263  | 0.4077  | -0.052  | -0.0503 |
| PVX_092555 | -0.4148 | -0.3394 | -0.3396 | -0.1627 | -0.0749 | 0.0238  | 0.1417  | -0.5443 | -0.5104 |
| PVX_113755 | 0.4639  | 0.0333  | -0.1289 | -0.2298 | -0.4227 | 0.2449  | 1.166   | 0.834   | 0.8217  |
| PVX_114245 | -0.3154 | -0.4581 | -0.3188 | -0.0304 | 0.5248  | 0.6473  | 0.432   | 0.2225  | 0.0051  |
| PVX_085420 | 0.2264  | 0.5335  | 0.517   | 0.4319  | 0.4881  | 0.077   | -0.6272 | -0.9732 | -1.1468 |
| PVX_092765 | -0.4304 | 0.1373  | 0.2469  | 0.1844  | 0.3016  | 0.6641  | 0.2592  | -0.4386 | -0.4124 |
| PVX_090050 | -0.1912 | -0.0221 | 0.1341  | 0.3329  | 0.2704  | -0.0635 | 0.1602  | 0.3775  | 0.1538  |
| PVX_101435 | 0.0282  | 0.0692  | 0.09    | 0.0121  | 0.1367  | 0.2273  | 0.0709  | 0.0502  | 0.4053  |
| PVX_091135 | 0.5076  | 0.0328  | -0.2588 | -0.3795 | -0.3886 | -0.3937 | 0.0571  | 0.4691  | 0.6338  |
| PVX_090950 | -0.0407 | 0.3893  | 0.38    | 0.3474  | 0.2059  | -0.0789 | -1.0515 | -1.8355 | -1.681  |
| PVX_116615 | 0.5038  | -0.5912 | -1.3165 | -1.3779 | -1.0313 | -0.1258 | 0.4028  | 0.7128  | 0.8873  |
| PVX_097820 | -0.5695 | -0.1681 | -0.1497 | 0.2013  | 0.3155  | 0.5084  | 0.1457  | 0.0106  | -0.4274 |
| PVX_088045 | -1.0125 | -1.0024 | -1.3009 | -1.4182 | -0.9561 | -0.0582 | 1.2815  | 0.9489  | 0.4676  |
| PVX_092110 | -0.1186 | -0.4483 | 0.3527  | 0.4704  | 0.5487  | 0.0305  | 0.4445  | -0.0045 | -0.3194 |
| PVX_113835 | -0.3581 | -0.4408 | 0.1034  | 0.0244  | 0.0771  | 0.0187  | 0.0591  | 0.2904  | -0.0121 |
| PVX_083490 | 0.2599  | 0.2489  | 0.2064  | 0.2354  | 0.2982  | 0.7377  | 0.6497  | 0.052   | -0.2913 |
| PVX_092345 | 0.7742  | 0.553   | 0.6027  | 0.4296  | 0.1408  | -0.5151 | -0.4012 | 0.0346  | 0.2446  |
| PVX_123860 | 0.101   | 0.6359  | 0.7153  | 0.7008  | 0.34    | 0.2356  | -0.2827 | -0.1035 | -0.2587 |
| PVX_080340 | -0.4758 | 0.4431  | 0.7598  | 0.7439  | 0.947   | 0.7067  | 0.0586  | -0.2133 | -0.3728 |
| PVX_085525 | 0.3337  | -0.3649 | -0.4746 | -0.3615 | -0.5212 | -0.6768 | -1.0131 | -0.92   | -0.8669 |
| PVX_085455 | 0.038   | 0.1056  | 0.1605  | 0.3846  | 0.315   | -0.245  | -0.149  | -0.2316 | -0.3524 |
| PVX_114895 | 0.3788  | 0.5902  | 0.5798  | 0.3755  | 0.2658  | 0.2019  | -0.3047 | -0.7293 | -0.9389 |
| PVX_115075 | 0.7683  | 0.5044  | 0.3161  | 0.0039  | -0.1624 | -0.2387 | 0.0931  | 0.1397  | -0.1064 |
| PVX_094660 | 0.3295  | -0.1423 | -0.3378 | -0.309  | 0.1646  | 0.507   | -0.2863 | -0.9674 | -0.9031 |
| PVX_115290 | 0.4534  | 0.2504  | -0.05   | -0.3204 | -0.4857 | -0.2193 | 0.1253  | -0.306  | 0.0193  |
| PVX_003920 | 0.5875  | 0.533   | 0.5546  | 0.5183  | 0.5327  | 0.3736  | 0.4901  | 0.4117  | 0.5102  |
| PVX_114460 | 0.3775  | 0.2798  | 0.2359  | 0.076   | -0.1966 | -0.3495 | -0.0371 | 0.0825  | -0.2063 |
| PVX_122870 | 0.0537  | 0.3054  | 0.4419  | 0.3146  | 0.1698  | 0.3534  | 0.7326  | 0.3897  | 0.2853  |
| PVX_092900 | 0.6523  | 0.833   | 0.6427  | 0.5417  | 0.3733  | 0.1902  | 0.1135  | 0.1708  | 0.4475  |
| PVX_097850 | -0.3574 | -0.4182 | -0.4201 | -0.4243 | -0.3218 | 0.0719  | 0.2877  | -0.5129 | -0.7396 |
| PVX_080560 | -0.8135 | -1.868  | -0.1627 | -0.0139 | 0.0812  | 0.5742  | 0.8625  | 0.5207  | 0.2438  |
| PVX_097710 | -0.644  | -0.5709 | -0.4878 | -0.4729 | -0.6583 | -0.5963 | 0.5817  | 0.477   | -0.0306 |
| PVX_100800 | -0.225  | -0.1607 | 0.2274  | 0.4529  | 0.58    | 0.5105  | -0.0468 | -0.1194 | 0.1695  |
| PVX_099540 | 0.0885  | -0.0522 | -0.4851 | -0.5409 | -0.3166 | 0.3673  | -0.3138 | -0.4017 | -0.2154 |
| PVX_118040 | 0.5579  | -0.3688 | -1.3234 | -1.7278 | -1.8605 | -1.2614 | 0.8063  | 1.2104  | 0.7967  |
| PVX_113540 | -0.2944 | -0.0768 | -0.0201 | 0.2913  | 0.2412  | -0.0546 | -0.1684 | -0.4227 | -0.473  |
| PVX_123390 | -0.7486 | -0.8001 | -0.5477 | -0.2107 | -0.055  | 0.3019  | 0.3311  | -0.2138 | -0.1006 |
| PVX_085370 | 0.3228  | -0.1069 | -0.317  | -0.4426 | -0.8127 | -0.5229 | 1.1179  | 1.1109  | 0.8093  |
| PVX_100860 | -0.3289 | 0.1163  | 0.4071  | 0.6056  | 0.3773  | 0.7567  | 0.4944  | -0.1029 | -0.1792 |
| PVX_085640 | -0.5559 | 0.1065  | -0.4591 | -0.0218 | 0.4491  | 0.3748  | 0.5623  | 0.9319  | 0.161   |
| PVX_113725 | 0.4236  | 0.186   | -0.1324 | -0.3953 | -0.8308 | -0.4815 | 0.367   | 0.5683  | 1.266   |
| PVX_020680 | -0.8895 | -0.7704 | -0.8413 | -1.014  | -1.1917 | -1.4186 | -1.4717 | -1.0162 | -0.7856 |
| PVX_113655 | 0.0576  | -0.0378 | 0.2336  | 0.5372  | 0.4236  | 0.1461  | -0.4742 | -0.729  | -0.7844 |
| PVX_122585 | -0.4539 | -0.4449 | -0.6052 | -0.8905 | -0.8335 | 0.054   | 0.7771  | 0.3776  | -0.0336 |

|            |         |         |         |         |         |         |         |         |         |
|------------|---------|---------|---------|---------|---------|---------|---------|---------|---------|
| PVX_083270 | 0.4553  | 0.3992  | 0.3926  | 0.2128  | -0.0778 | -0.4644 | -0.7843 | -0.1873 | 0.1134  |
| PVX_114755 | 0.0733  | -0.4946 | -0.8476 | -0.5282 | -0.2052 | 0.0765  | 0.9218  | 0.9052  | 0.5126  |
| PVX_123575 | 0.1172  | -0.2266 | -0.4359 | -0.3046 | -0.4407 | -0.4457 | 0.3143  | 1.2805  | 1.0456  |
| PVX_096300 | -0.2742 | -0.1058 | 0.1993  | 0.0431  | 0.1359  | -0.1703 | -0.223  | -0.208  | -0.3508 |
| PVX_086210 | 0.6712  | -0.1315 | -0.4653 | -0.6702 | -0.6982 | -0.6155 | -0.2461 | 0.0173  | 0.3591  |
| PVX_094955 | 0.4776  | 0.125   | -0.0534 | -0.1564 | 0.2677  | 0.7364  | 0.3518  | -0.2663 | -0.436  |
| PVX_001710 | 0.9814  | 0.7252  | 0.498   | 0.1454  | 0.0119  | -0.1156 | -0.8602 | -1.177  | -0.8727 |
| PVX_103665 | 0.3115  | 0.3766  | 0.19    | 0.3786  | 0.2509  | 0.1375  | 0.3092  | 0.55    | 0.683   |
| PVX_095205 | -0.4987 | 0.0897  | 0.4608  | 0.4545  | 0.0961  | 0.3362  | -0.017  | -0.2387 | -0.446  |
| PVX_085565 | -0.1263 | -1.1143 | -1.6586 | -0.927  | 0.1237  | 1.1314  | 0.966   | 0.344   | 0.6066  |
| PVX_095380 | -1.3203 | -0.4142 | 0.1455  | 0.2125  | 0.4601  | 0.4426  | -0.4502 | -1.0004 | -1.3074 |
| PVX_098780 | -0.0152 | -0.0993 | -0.2677 | -0.4465 | -0.3958 | -0.445  | 0.207   | 0.0256  | 0.2372  |
| PVX_113935 | 1.0818  | 0.6746  | 0.2762  | -0.0419 | -0.4699 | -0.8749 | -0.941  | -0.5524 | -0.0825 |
| PVX_097835 | 0.0416  | -0.2634 | -0.2434 | -0.1673 | 0.4945  | 0.8058  | 0.5063  | 0.0173  | 0.1163  |
| PVX_124035 | -0.2938 | -0.2797 | 0.18    | 0.3898  | 0.261   | 0.0975  | -0.175  | -0.0849 | -0.0936 |
| PVX_095075 | 0.0881  | 0.0105  | 0.1206  | 0.3357  | 0.183   | 0.7625  | 0.7188  | 0.2853  | -0.1917 |
| PVX_079745 | -0.6853 | -0.3166 | -0.1121 | 0.1045  | -0.1546 | 0.4641  | 0.2267  | 0.1854  | 0.0362  |
| PVX_090985 | -0.8325 | 0.3754  | 0.6658  | 0.6418  | 0.1871  | -0.0119 | -0.4424 | -0.837  | -1.2374 |
| PVX_117715 | 0.9883  | 1.0272  | 0.5195  | 0.3097  | -0.0405 | -0.4877 | -0.2234 | 0.7078  | 1.1187  |
| PVX_094645 | -0.0749 | 1.094   | 0.8702  | 0.4717  | 0.0032  | -0.7257 | -1.3592 | -1.673  | -1.4408 |
| PVX_080235 | -0.4021 | 0.2293  | 0.5194  | 0.7048  | 0.7792  | 0.2018  | -0.4085 | -0.5149 | -0.5192 |
| PVX_116965 | -0.1509 | 0.1664  | 0.2892  | 0.2773  | 0.4004  | 0.0263  | 0.0529  | -0.0177 | -0.1182 |
| PVX_082750 | 0.1549  | -0.0689 | 0.2398  | 0.4287  | 0.2225  | 0.286   | 0.0856  | 0.2932  | 0.5961  |
| PVX_096295 | 0.4515  | 0.4342  | 0.3499  | 0.1907  | 0.2632  | 0.2093  | 0.377   | 0.1962  | -0.2568 |
| PVX_114020 | -1.046  | -1.2309 | -1.2389 | -0.698  | -0.1284 | 0.3757  | 0.4802  | 0.2966  | -0.1714 |
| PVX_122355 | 0.0432  | 0.5721  | 0.4854  | 0.3635  | 0.2659  | 0.1879  | -0.7531 | -0.6728 | -0.4283 |
| PVX_089065 | 0.2856  | -0.0068 | 0.0457  | 0.1594  | -0.0766 | -0.9953 | -0.1812 | -0.0898 | 0.4559  |
| PVX_001860 | -0.3922 | -0.3405 | -0.098  | -0.2971 | -0.2493 | 0.1334  | 0.8011  | 0.8969  | 0.4717  |
| PVX_093725 | 0.4807  | 0.1197  | -0.016  | -0.2316 | -0.7006 | -0.3751 | -0.1777 | -0.2479 | 0.0241  |
| PVX_003695 | 0.8303  | -0.1854 | -0.3779 | -0.3302 | -0.3555 | -0.3261 | 0.3321  | 0.8764  | 1.1328  |
| PVX_115350 | 0.4349  | 0.6088  | 0.4538  | 0.4839  | 0.2045  | 0.008   | -0.4186 | -0.532  | -0.3074 |
| PVX_114250 | -0.1499 | 0.1302  | 0.2984  | 0.431   | 0.6907  | 0.288   | -0.1469 | -0.2262 | -0.2686 |
| PVX_098020 | 0.065   | -0.9461 | -1.1486 | -0.6379 | 0.2217  | 0.7552  | 0.4269  | 0.3301  | 0.2545  |
| PVX_084820 | 0.1329  | 0.5962  | 0.6362  | 0.7093  | 0.3548  | -0.1618 | -1.0737 | -1.0128 | -0.7859 |
| PVX_089685 | 0.0732  | -0.0144 | -0.4575 | -0.8497 | -0.6675 | 0.0419  | 0.5906  | 0.6109  | 0.5979  |
| PVX_096155 | -0.2894 | -0.6783 | -0.7271 | -0.4207 | 0.3439  | 0.7237  | 0.8696  | 0.5177  | 0.1859  |
| PVX_101150 | -0.1436 | -0.6312 | -0.6912 | -0.6802 | -0.1621 | 0.9635  | 0.7051  | 0.1974  | 0.1423  |
| PVX_001680 | -1.895  | -2.1998 | -1.9743 | -2.2317 | -2.8924 | -2.7025 | -1.06   | 1.5483  | 1.6301  |
| PVX_084270 | -0.4231 | 0.2507  | 0.0468  | 0.1491  | 0.3489  | -0.1653 | -0.5491 | -0.6243 | -0.6742 |
| PVX_017145 | -0.4013 | -0.484  | -0.2599 | -0.3304 | -0.0601 | -0.0661 | -0.3785 | -0.1529 | -0.0534 |
| PVX_086855 | 1.5476  | 1.4507  | 1.3791  | 0.8037  | -0.9846 | -1.0764 | -1.1447 | -0.9052 | -0.2888 |
| PVX_084240 | 0.4929  | -0.1981 | -0.5249 | -0.58   | -0.4935 | -0.5735 | 0.0427  | 0.7075  | 0.9404  |
| PVX_082745 | -0.1044 | 0.0838  | 0.2611  | -0.0034 | 0.0841  | 0.4827  | 0.4334  | -0.1874 | -0.2677 |
| PVX_118365 | -0.6739 | 0.362   | 0.6923  | 0.7059  | 0.1651  | -0.3663 | -0.9758 | -0.9407 | -0.7237 |
| PVX_086890 | 0.1378  | 0.084   | 0.2025  | -0.105  | 0.1915  | 0.1749  | 0.245   | 0.0757  | 0.0906  |
| PVX_092985 | -0.4057 | -0.5476 | -0.2881 | 0.1718  | 0.7014  | 0.7739  | 0.1011  | -0.327  | -0.1308 |
| PVX_114545 | 0.1646  | 0.3136  | 0.817   | 1.1779  | 0.9106  | 0.4341  | 0.2547  | 0.2409  | 0.01    |
| PVX_100635 | -0.4748 | -0.033  | 0.0647  | 0.326   | 0.6385  | 0.6625  | 0.1243  | -0.285  | -0.4927 |
| PVX_094425 | -0.2258 | 0.0088  | -0.0406 | -0.2129 | 0.08    | 0.3034  | 0.7069  | 0.4294  | 0.3698  |
| PVX_086950 | 0.4601  | 0.5269  | 0.5758  | 0.2553  | 0.356   | 0.6893  | 0.4988  | -0.0086 | -0.0129 |
| PVX_119820 | -0.3659 | -0.1488 | -0.2297 | -0.3282 | -0.177  | -0.047  | -0.0205 | -0.3471 | -0.6137 |
| PVX_101370 | -1.2243 | -1.3562 | -0.9194 | 0.3105  | 0.438   | 0.2274  | 0.3348  | 0.6117  | 0.4326  |
| PVX_118130 | -0.2537 | 0.1867  | 0.4864  | 0.7038  | 0.6646  | 0.2264  | -0.2259 | -0.3252 | -0.2307 |
| PVX_084575 | -0.1903 | -0.0128 | -0.0865 | 0.1651  | 0.3217  | 0.3696  | 0.0046  | -0.166  | 0.0386  |
| PVX_117305 | -0.1389 | -0.3776 | -0.382  | -0.2643 | 0.3965  | 0.8411  | 0.3673  | -0.1217 | -0.0033 |
| PVX_123660 | 0.7212  | 0.1949  | 0.1505  | 0.1927  | -0.1058 | -0.097  | -0.1191 | -0.0874 | 0.453   |
| PVX_117220 | 0.8167  | 0.1241  | -0.193  | -0.3049 | -0.2234 | -0.3793 | 0.3367  | 1.0898  | 1.4996  |
| PVX_122470 | 0.7788  | 0.1877  | 0.0716  | 0.0009  | -0.0373 | 0.1855  | 0.5605  | 0.3102  | -0.0662 |
| PVX_113925 | -0.286  | -0.2105 | -0.1512 | -0.2088 | -0.1326 | -0.0085 | -0.2062 | -0.2589 | -0.0633 |
| PVX_084965 | 0.2252  | 0.3758  | 0.5301  | 0.4362  | 0.6726  | 0.4026  | 0.4114  | 0.3768  | 0.3564  |
| PVX_114655 | 0.6708  | 0.5841  | 0.3898  | 0.2298  | 0.287   | 0.3152  | 0.5297  | 0.3118  | 0.3084  |
| PVX_089110 | -0.2332 | -0.6028 | -0.3308 | -0.5493 | -0.7019 | 0.0013  | 0.3657  | 0.2575  | 0.4948  |
| PVX_099480 | 0.3586  | 0.4308  | 0.3351  | 0.2703  | 0.222   | -0.1903 | -0.4317 | -0.3717 | -0.3263 |

|            |         |         |         |         |         |         |         |         |         |
|------------|---------|---------|---------|---------|---------|---------|---------|---------|---------|
| PVX_123875 | 0.534   | 0.5679  | 0.3382  | 0.1368  | 0.2295  | -0.0945 | -0.1903 | -0.1006 | 0.0459  |
| PVX_085645 | -0.1382 | 0.0542  | 0.3004  | 0.3057  | 0.2362  | 0.6193  | 0.081   | -0.224  | -0.4909 |
| PVX_099065 | 0.889   | 0.0939  | -0.2528 | -0.2778 | -0.1451 | -0.439  | 0.114   | 0.516   | 1.0698  |
| PVX_000975 | -0.5822 | -0.9195 | -0.8695 | -0.557  | -0.0643 | 0.8418  | 0.3539  | 0.0256  | 0.1661  |
| PVX_085030 | -0.704  | -0.894  | -1.0707 | -1.3808 | -1.3736 | -1.2514 | 1.0245  | 1.0201  | 0.1804  |
| PVX_119665 | -0.0763 | 0.425   | 0.3672  | 0.329   | 0.3273  | -0.1176 | -0.3827 | -0.3845 | -0.2466 |
| PVX_092605 | -0.5047 | -0.285  | -0.0241 | 0.1773  | 0.1982  | 0.1266  | -0.1681 | -0.4834 | -0.2237 |
| PVX_091680 | 0.4935  | 0.3799  | 0.0816  | 0.0397  | 0.1558  | -0.1816 | -0.0603 | 0.214   | 0.6643  |
| PVX_115320 | 0.6715  | -0.0392 | -0.2588 | -0.361  | -0.4463 | -0.3647 | 0.3074  | 0.8821  | 0.9058  |
| PVX_117970 | -0.0478 | 0.1544  | 0.044   | 0.1293  | 0.1131  | -0.3694 | -0.4142 | -0.2962 | -0.2978 |
| PVX_123340 | 0.3791  | 0.0658  | 0.4539  | 0.4991  | 0.2842  | 0.0782  | -0.7957 | -1.3193 | -1.2016 |
| PVX_119715 | 0.8129  | 0.5552  | 0.4412  | 0.317   | 0.0795  | 0.3609  | 0.3522  | 0.5187  | 1.2684  |
| PVX_092230 | -0.2257 | -0.3602 | -0.2471 | -0.0778 | 0.016   | 0.0558  | -0.1478 | 0.0908  | -0.1544 |
| PVX_096145 | -0.0121 | 0.3653  | 0.4141  | 0.4442  | 0.1807  | -0.0472 | 0.0079  | -0.0346 | 0.1979  |
| PVX_091920 | -0.7147 | 0.3715  | 0.5882  | 0.8889  | 1.0794  | 0.3517  | -0.5769 | -1.2    | -1.4243 |
| PVX_086945 | -0.5472 | -0.4618 | -0.7885 | -0.4999 | -0.4192 | -0.5017 | -0.1725 | 1.0672  | 0.8015  |
| PVX_084660 | -0.3544 | -0.8264 | -0.8178 | 0.1439  | 1.1934  | 0.673   | 0.239   | 0.2596  | 0.065   |
| PVX_094460 | 0.4067  | -0.2638 | -0.1951 | -0.303  | -0.3497 | -0.3263 | 0.1244  | -0.0802 | 0.6191  |
| PVX_092635 | -0.0914 | 0.3242  | 0.5279  | 0.6098  | 0.6117  | 0.1172  | -0.4704 | -0.2465 | -0.1189 |
| PVX_001955 | -0.729  | -0.9912 | -1.3238 | -0.6038 | 0.1408  | 0.4225  | 0.5276  | 0.2426  | -0.2699 |
| PVX_116975 | -0.3153 | 0.0473  | 0.474   | 0.4818  | 0.5785  | 0.2821  | -0.0738 | -0.1247 | -0.1199 |
| PVX_094755 | 0.2215  | 0.1992  | 0.2072  | 0.0465  | 0.032   | 0.396   | -0.1945 | -0.7787 | -0.7178 |
| PVX_097920 | -0.8343 | -0.8817 | -0.8448 | -0.8834 | -0.7838 | 0.53    | 1.1008  | 0.1016  | -0.6695 |
| PVX_097910 | 0.183   | -0.1183 | 0.1274  | 0.6757  | 0.9674  | 0.2734  | 0.5304  | 0.4105  | 0.0971  |
| PVX_099465 | -0.5538 | 0.2774  | 0.5523  | 0.7273  | 0.2929  | -0.4049 | -0.5371 | -0.7599 | -0.7472 |
| PVX_115200 | 0.3988  | 0.669   | 0.7868  | 0.5741  | 0.3826  | -0.0836 | -1.1185 | -0.9671 | -0.8396 |
| PVX_081375 | -1.5032 | -0.2488 | 0.0991  | 0.3898  | 0.9518  | 0.9451  | -0.1874 | -1.061  | -1.4665 |
| PVX_113710 | 0.2553  | 0.2875  | 0.2084  | 0.2194  | 0.2938  | 0.2648  | -0.3687 | -0.7318 | -0.5301 |
| PVX_080135 | 1.1318  | 0.8374  | 0.6701  | 0.5452  | 0.0139  | -0.5728 | -0.4625 | -0.4165 | -0.3322 |
| PVX_001840 | -0.1967 | -0.5292 | -0.2662 | 0.0843  | 0.3435  | 0.8133  | 0.415   | 0.1164  | -0.0606 |
| PVX_091960 | 0.2496  | 0.4033  | 0.3557  | 0.2241  | 0.1859  | -0.2771 | -0.7868 | -0.8541 | -0.3994 |
| PVX_119470 | 0.2614  | 0.4885  | 0.5147  | 0.3677  | 0.1604  | 0.0041  | -0.584  | -1.0199 | -1.213  |
| PVX_085590 | 0.1477  | 0.0558  | 0.1753  | 0.2698  | 0.175   | -0.0894 | 0.0583  | -0.2078 | -0.307  |
| PVX_116565 | 0.164   | 0.0509  | -0.1233 | -0.1404 | -0.018  | 0.58    | 0.8901  | 0.8441  | 0.6612  |
| PVX_097950 | 0.3887  | 0.4656  | 0.288   | 0.2126  | 0.2113  | 0.152   | 0.0523  | 0.0519  | 0.0631  |
| PVX_114490 | -0.262  | -0.3296 | -0.324  | 0.1155  | 0.112   | 0.2293  | 0.0029  | -0.6856 | -0.6859 |
| PVX_092185 | 0.1271  | -0.193  | -0.3093 | -0.2808 | 0.1138  | 0.723   | 0.8144  | 0.6569  | 0.5651  |
| PVX_089230 | 0.2261  | 0.1766  | 0.2952  | 0.1719  | 0.306   | 0.4794  | 0.6912  | 0.3205  | 0.1369  |
| PVX_084200 | -0.2262 | 0.0102  | 0.1771  | 0.0063  | 0.186   | 0.1732  | 0.1816  | 0.1607  | 0.2406  |
| PVX_088985 | -0.5614 | -0.4712 | -0.0161 | 0.2835  | 0.5319  | 0.6681  | -0.0576 | -0.4359 | -0.3421 |
| PVX_101330 | -0.7453 | -0.5325 | 0.195   | 0.3179  | 0.2317  | -0.0117 | -0.4235 | -0.3935 | -0.2924 |
| PVX_097690 | -0.31   | -0.7625 | -1.0835 | -1.4723 | -1.475  | -0.5965 | 0.627   | 0.4662  | 0.3377  |
| PVX_088815 | 0.8566  | 0.5169  | 0.2681  | 0.0912  | -0.2115 | -0.0251 | 0.4286  | 0.3497  | 0.3791  |
| PVX_091145 | 0.2342  | 0.4082  | 0.4499  | 0.1152  | 0.2595  | 0.036   | -0.5096 | -1.1463 | -1.0277 |
| PVX_091510 | -0.1681 | 0.0976  | 0.2244  | 0.4043  | 0.2207  | 0.1132  | -0.1567 | 0.1722  | -0.1245 |
| PVX_080510 | 0.6456  | 0.2898  | 0.2312  | 0.0899  | -0.1726 | -0.1028 | 0.2808  | 0.7026  | 0.8302  |
| PVX_118000 | 0.245   | -0.035  | 0.0266  | 0       | -0.2254 | -0.4669 | -0.3146 | -0.2772 | -0.4443 |
| PVX_053690 | -0.106  | -0.1547 | -0.2922 | -0.337  | -0.3942 | 0.1252  | 0.3244  | 0.4575  | 0.2614  |
| PVX_091540 | 0.4235  | -0.1726 | -0.1963 | -0.0997 | 0.081   | 0.5391  | 0.3095  | 0.0275  | 0.436   |
| PVX_117460 | 0.182   | 0.2012  | 0.0566  | -0.132  | -0.4877 | -0.2006 | -0.2292 | 0.0506  | -0.2016 |
| PVX_099535 | -0.9443 | 0.2727  | 0.5375  | 0.5488  | 0.1976  | -0.2603 | -1.5974 | -1.894  | -1.936  |
| PVX_099410 | -0.5444 | -0.8096 | -1.0105 | -0.8045 | -0.7654 | 0.1514  | 1.013   | 0.5887  | -0.1786 |
| PVX_096990 | -0.1854 | -0.3018 | -0.5537 | -0.7832 | -0.8312 | -1.0529 | -0.9239 | 0.0761  | 0.3498  |
| PVX_117725 | -0.326  | -0.3771 | -0.2539 | -0.2596 | -0.4724 | -0.2872 | -0.133  | -0.0724 | -0.1318 |
| PVX_087775 | 0.2646  | 0.0129  | 0.0239  | -0.0041 | 0.0796  | 0.4455  | 0.4612  | 0.2383  | -0.2349 |
| PVX_099390 | -0.593  | 0.2445  | 0.5688  | 0.8014  | 0.9905  | -0.034  | -0.4859 | -0.7486 | -0.5216 |
| PVX_000670 | -0.461  | -0.3753 | -0.0905 | 0.1074  | 0.1585  | 0.155   | 0.2196  | 0.0475  | -0.3442 |
| PVX_091550 | -0.5915 | -0.0216 | 0.3978  | 0.5592  | 0.9731  | 0.7334  | -0.148  | -0.7166 | -0.7109 |
| PVX_123495 | 0.3456  | 0.5235  | 0.5589  | 0.6557  | 0.4077  | 0.2782  | 0.1864  | 0.0179  | 0.2571  |
| PVX_089395 | 0.0315  | 0.0693  | -0.1685 | -0.3338 | -0.0927 | 0.1116  | 0.3467  | 0.1235  | 0.1627  |
| PVX_118445 | -0.6559 | -0.7579 | -0.9333 | -0.7843 | -0.5885 | -0.7645 | 0.7799  | 0.8057  | 0.4588  |
| PVX_099405 | -0.8203 | -0.9038 | -1.211  | -0.6985 | -0.3146 | 0.9089  | 1.3167  | 0.6143  | 0.0317  |
| PVX_114935 | 0.2398  | 0.1713  | 0.2017  | 0.2602  | 0.0684  | -0.4555 | -0.4008 | -0.339  | -0.2194 |

|            |         |         |         |         |         |         |         |         |         |
|------------|---------|---------|---------|---------|---------|---------|---------|---------|---------|
| PVX_083125 | 0.2278  | 0.1383  | -0.0024 | 0.3878  | 0.6278  | 0.039   | -0.4292 | -0.3571 | -0.2333 |
| PVX_085765 | 0.3149  | 0.0889  | 0.2728  | 0.3594  | 0.0041  | 0.1387  | -0.0338 | 0.8321  | 0.894   |
| PVX_095470 | 0.4267  | -0.1651 | -0.1549 | 0.0527  | -0.235  | 0.0159  | 0.0817  | 0.5819  | 0.4783  |
| PVX_094575 | -0.0932 | 0.4152  | 0.5743  | 0.6412  | 0.5508  | -0.1798 | -0.4064 | -0.3718 | -0.2629 |
| PVX_113505 | -0.219  | -0.1649 | 0.223   | 0.3019  | 0.3514  | 0.5815  | 0.0028  | -0.7123 | -0.6837 |
| PVX_123765 | -0.2431 | -0.3308 | -0.8202 | -1.4396 | -1.4746 | -0.8355 | 0.2111  | 0.9099  | 0.9234  |
| PVX_002940 | -0.0395 | 0.37    | 0.3989  | 0.3749  | 0.3187  | 0.2755  | -0.1131 | -0.3794 | -0.5187 |
| PVX_002920 | -0.5975 | -0.1036 | 0.2548  | 0.4818  | 0.7161  | 0.0705  | -0.0616 | 0.3479  | 0.1084  |
| PVX_080550 | -0.3192 | -0.3461 | 0.1912  | 0.446   | 0.3755  | 0.7753  | 0.2199  | -0.051  | -0.0989 |
| PVX_097765 | -0.688  | -0.1868 | 0.3686  | 0.7669  | 0.6603  | 0.0989  | -0.228  | -0.3815 | -0.6604 |
| PVX_087095 | -0.968  | -0.9384 | -0.5543 | -0.4849 | 0.1864  | 0.9127  | 0.4583  | 0.2941  | 0.0537  |
| PVX_099625 | -0.4611 | 0.0841  | 0.2576  | 0.3617  | 0.002   | -0.3275 | -0.5661 | -0.28   | -0.4244 |
| PVX_081315 | 0.2459  | 0.1127  | 0.1486  | 0.2382  | 0.2778  | 0.1573  | 0.1027  | 0.5124  | 0.348   |
| PVX_122065 | 0.7063  | 0.8624  | 0.724   | 0.6351  | 0.0884  | -0.1532 | -0.5226 | -0.2525 | -0.0952 |
| PVX_029190 | -0.9635 | -0.8268 | -1.0512 | -0.7958 | -0.9502 | 1.4336  | 1.5048  | 0.3862  | -0.2409 |
| PVX_117985 | 0.1042  | -0.043  | -0.1575 | -0.4079 | -0.5248 | -0.237  | -0.1054 | 0.1092  | 0.1903  |
| PVX_042690 | 0.408   | 0.5155  | 0.3788  | 0.624   | 0.3713  | 0.0981  | -0.0233 | -0.0446 | -0.0349 |
| PVX_083340 | 0.3793  | 0.5606  | 0.6314  | 0.5155  | 0.1581  | -0.1656 | -0.567  | -0.4052 | -0.0986 |
| PVX_082370 | 0.0584  | 0.63    | 0.8835  | 0.688   | 0.2968  | -0.3196 | -0.3936 | -0.3489 | -0.1418 |
| PVX_122640 | 0.7761  | 0.4017  | -0.2724 | -0.7965 | -0.8727 | -0.7924 | 0.1294  | 0.9418  | 1.3777  |
| PVX_095185 | -0.009  | 0.7897  | 0.8295  | 0.7695  | 0.1987  | -0.3092 | -0.3923 | -0.4645 | -0.4693 |
| PVX_094545 | 0.0298  | 0.423   | 0.3495  | 0.2467  | 0.2428  | 0.194   | -0.0275 | -0.224  | 0.0152  |
| PVX_088195 | -0.0945 | 0.1691  | 0.1581  | 0.1809  | 0.3304  | -0.0884 | -0.576  | -0.6005 | -0.4545 |
| PVX_122230 | -0.539  | -0.9005 | -1.35   | -1.3685 | -1.8598 | -1.2003 | 0.6097  | 1.269   | 0.7498  |
| PVX_123045 | -0.9525 | -1.0718 | -1.2371 | -1.189  | -0.977  | -1.1365 | -0.2852 | 1.187   | 1.0011  |
| PVX_114765 | 0.4943  | 0.3671  | 0.048   | 0.012   | 0.1911  | -0.2719 | 0.1327  | 0.1933  | 0.2804  |
| PVX_003725 | -0.4245 | -0.1466 | -0.0004 | 0.0651  | -0.3065 | 0.9925  | 0.6943  | -0.3084 | -0.5195 |
| PVX_119390 | 0.4541  | 0.3758  | 0.246   | 0.1483  | 0.1603  | 0.1125  | -0.4785 | -0.9659 | -1.1327 |
| PVX_002700 | -0.6639 | -0.7817 | -0.9638 | -0.7727 | -0.4463 | 0.7221  | 1.0822  | 0.4069  | -0.3431 |
| PVX_094835 | -0.5645 | -0.4946 | -0.2795 | -0.0396 | 0.3255  | 0.5704  | 0.3083  | 0.0387  | 0.1016  |
| PVX_118180 | -0.4694 | 0.2841  | 0.661   | 0.8325  | 0.1324  | 0.1696  | -1.0513 | -1.0722 | -0.5867 |
| PVX_098875 | -0.2548 | 0.4918  | 0.6205  | 0.5001  | 0.4341  | -0.5332 | -0.533  | 0.0046  | -0.0141 |
| PVX_081630 | -0.667  | -0.289  | -0.0813 | -0.0472 | 0.063   | 0.2372  | 0.0737  | -0.2238 | -0.641  |
| PVX_122880 | -1.0795 | -0.5673 | -0.5694 | -0.3086 | -0.2115 | 0.6341  | 0.3577  | -0.5195 | -0.7294 |
| PVX_113405 | 1.0496  | 0.5231  | 0.1908  | 0.0911  | 0.9834  | 1.2439  | 1.5265  | 1.184   | 0.6431  |
| PVX_001650 | 1.5199  | 0.7331  | 0.3948  | -0.0229 | -0.1572 | -0.7027 | -1.1635 | -0.9337 | -0.405  |
| PVX_088830 | 1.149   | 0.9339  | 0.7268  | 0.0867  | -0.7783 | -1.903  | -1.8873 | -0.7285 | -0.1906 |
| PVX_002585 | 0.1844  | 0.0059  | -0.3041 | -0.4957 | -0.8084 | 0.4126  | 0.5596  | -0.05   | 0.3336  |
| PVX_084235 | -0.0667 | -0.1664 | 0.1779  | 0.1876  | 0.0201  | -0.1048 | -0.0869 | -0.0877 | 0.1316  |
| PVX_097880 | 0.5425  | -0.3017 | -0.2929 | -0.1848 | 0.0969  | 0.6177  | 0.2581  | 0.3892  | 0.7435  |
| PVX_113570 | -0.6768 | -0.1291 | 0.3785  | 0.5264  | 0.4079  | 0.0061  | -0.4609 | -0.5916 | -0.6558 |
| PVX_115000 | -0.5365 | -0.1632 | 0.109   | 0.3681  | 0.1261  | 0.3546  | -0.3824 | -0.9178 | -1.1273 |
| PVX_001715 | -0.0435 | 0.2538  | 0.3389  | 0.3683  | 0.3454  | -0.0887 | 0.2707  | 0.4408  | 0.2576  |
| PVX_081490 | 0.0729  | 0.4895  | 0.7168  | 0.8257  | 0.7353  | 0.2191  | -0.2947 | -0.0077 | -0.0691 |
| PVX_081405 | -0.294  | -0.4892 | -0.2058 | 0.1867  | 0.7779  | 0.7354  | -0.0808 | -0.1703 | -0.2517 |
| PVX_086125 | -0.1904 | -0.0017 | -0.0567 | 0.0031  | 0.094   | 0.2012  | -0.0041 | -0.0906 | 0.5632  |
| PVX_015130 | -0.6521 | -0.561  | -0.4305 | 0.3183  | 0.6699  | 0.7388  | 0.2797  | -0.0293 | -0.1624 |
| PVX_094655 | -0.4195 | -0.5461 | -0.7702 | -0.9074 | -1.0965 | -1.6891 | -1.3442 | 0.8024  | 1.1184  |
| PVX_105710 | 0.0401  | 0.075   | -0.3433 | -0.4313 | -0.3317 | -0.2363 | -0.1721 | -0.2128 | 0.1809  |
| PVX_100515 | -0.3155 | -0.2722 | -0.5837 | -0.7484 | -0.8422 | 0.1429  | 0.1354  | 0.9538  | 1.0504  |
| PVX_123775 | 0.2233  | 0.2514  | 0.2643  | 0.2837  | 0.3121  | -0.0079 | 0.5034  | 0.6768  | 0.7279  |
| PVX_119795 | -0.8321 | -0.4088 | 0.157   | 0.5532  | 0.6448  | 0.514   | -0.3184 | -0.4747 | -0.5879 |
| PVX_002535 | 1.7069  | 1.362   | 0.7119  | 0.5021  | 0.1412  | 0.0117  | -0.0572 | 0.0016  | 0.2929  |
| PVX_082865 | 0.3526  | -0.1881 | -0.103  | -0.368  | -0.4769 | 0.3659  | 0.589   | 0.322   | 0.7447  |
| PVX_080405 | 0.2077  | 0.5794  | 0.6441  | 0.5367  | 0.3626  | -0.1937 | -1.1193 | -1.1645 | -0.9098 |
| PVX_095315 | 0.5428  | 0.4108  | 0.2667  | 0.1962  | 0.4699  | 0.5434  | -0.1573 | -0.6969 | -0.9086 |
| PVX_080040 | 0.2956  | 0.1029  | -0.107  | -0.021  | 0.2705  | 0.0752  | 0.0545  | 0.14    | 0.4364  |
| PVX_124105 | -0.2518 | 0.4768  | 0.9076  | 1.0441  | 1.0638  | 0.2601  | -0.356  | -0.7909 | -0.6273 |
| PVX_086115 | 0.389   | 0.3696  | 0.0954  | -0.1351 | -0.3439 | -0.0553 | -0.0177 | 0.7584  | 0.6077  |
| PVX_101505 | -1.1297 | -1.1599 | -1.678  | -1.8574 | -2.1862 | -2.0164 | 0.3008  | 1.4447  | 0.7793  |
| PVX_088275 | 0.647   | 0.206   | 0.0062  | -0.2154 | -0.4157 | 0.635   | 0.4184  | 0.0078  | 0.3142  |
| PVX_000005 | 0.3836  | 0.4745  | 0.159   | -0.2245 | -0.6719 | -0.5354 | -0.4612 | 0.0917  | 0.5418  |
| PVX_087845 | -0.038  | -0.4445 | -0.3524 | 0.0518  | 0.3044  | 0.4087  | 0.4617  | 0.5095  | 0.377   |

|            |         |         |         |         |         |         |         |         |         |
|------------|---------|---------|---------|---------|---------|---------|---------|---------|---------|
| PVX_089740 | -0.1784 | -0.0047 | 0.2136  | 0.7431  | 0.4963  | 0.763   | 0.3782  | 0.4223  | 0.5287  |
| PVX_083345 | 0.5572  | 0.1448  | 0.0778  | -0.5528 | -0.5797 | -0.0382 | 0.0206  | 0.2888  | 0.8601  |
| PVX_087030 | 0.2021  | 0.5819  | 0.5934  | 0.4722  | 0.4509  | 0.2137  | -0.1321 | -0.1212 | -0.1661 |
| PVX_116705 | 0.0482  | 0.1799  | 0.3693  | 0.3946  | 0.6117  | 0.6309  | 0.3688  | 0.0705  | 0.1073  |
| PVX_085775 | -0.259  | 0.121   | 0.6741  | 0.718   | 0.2156  | -0.1227 | -0.1982 | -0.1542 | 0.1102  |
| PVX_092910 | -0.9254 | 0.3693  | 0.7192  | 0.7027  | 0.5009  | -0.6943 | -1.1767 | -0.142  | -0.04   |
| PVX_067190 | -0.0421 | -0.7264 | -0.1555 | -0.1661 | -0.3374 | -0.1304 | -0.3652 | -0.2157 | -0.303  |
| PVX_081275 | -0.1723 | -0.2628 | -0.3351 | -0.3743 | -0.3949 | -0.3944 | -0.3318 | -0.5452 | -0.6911 |
| PVX_090195 | -0.7137 | 0.1156  | 0.1875  | 0.3347  | 0.2616  | 0.3919  | 0.2652  | -0.5573 | -0.6354 |
| PVX_097740 | 0.0875  | 0.1823  | 0.204   | 0.0969  | 0.2162  | 0.0269  | -0.2937 | 0.0382  | 0.2748  |
| PVX_003790 | 0.1587  | 0.6214  | 0.6524  | 0.4384  | 0.378   | 0.1168  | -0.353  | -0.1068 | -0.0026 |
| PVX_082965 | 0.1881  | 0.4676  | 0.4007  | 0.284   | 0.1703  | -0.0993 | -0.5815 | -1.2592 | -1.3852 |
| PVX_082835 | -1.3504 | -0.2673 | -0.0323 | 0.1873  | 0.4224  | 0.5378  | -0.1236 | -1.2163 | -1.4505 |
| PVX_085365 | 0.7128  | 0.6774  | 0.5611  | 0.4879  | 0.3455  | -0.1512 | -0.0054 | -0.3018 | -0.4049 |
| PVX_002930 | -0.1819 | -0.4307 | -0.5893 | -0.19   | 0.2368  | 0.3194  | 0.4388  | 0.1948  | -0.0078 |
| PVX_084600 | -0.0668 | 0.2309  | 0.2801  | 0.17    | 0.2391  | 0.4964  | 0.3672  | -0.0472 | -0.4576 |
| PVX_088910 | -0.5295 | -0.4425 | -0.5036 | -0.6388 | -0.6223 | -0.762  | -0.121  | 1.0877  | 0.787   |
| PVX_107750 | -0.0969 | -0.0474 | -0.0424 | -0.2905 | -0.193  | -0.2742 | -0.0113 | 0.2125  | 0.1447  |
| PVX_114480 | -1.5921 | -0.5727 | -0.0507 | 0.5232  | 0.4683  | -0.8702 | -1.8521 | -1.9078 | -1.7205 |
| PVX_124080 | 0.0036  | 0.5491  | 0.5963  | 0.3635  | 0.6489  | 0.4326  | 0.0311  | 0.3407  | 0.0304  |
| PVX_119480 | -0.0645 | 0.0278  | 0.0606  | -0.0966 | -0.1249 | -0.2845 | -1.1188 | -1.5079 | -1.5639 |
| PVX_113370 | -1.5518 | -1.6228 | -1.7181 | -1.5806 | -1.4527 | -0.3261 | 1.7342  | 0.8895  | 0.034   |
| PVX_084145 | 0.8018  | 0.1041  | -0.2517 | -0.2857 | -0.5093 | -0.363  | 0.3399  | 0.9422  | 1.1142  |
| PVX_114695 | 0.3933  | 0.4     | 0.4115  | 0.1182  | -0.2511 | -0.3006 | 0.3663  | 0.6571  | 0.6455  |
| PVX_113400 | -0.6199 | -0.5741 | -0.3477 | 0.3412  | 0.9246  | 0.5752  | 0.042   | -0.0531 | -0.1847 |
| PVX_118610 | 0.209   | 0.5901  | 0.4868  | 0.3404  | 0.2756  | 0.277   | 0.1177  | -0.5128 | -0.4254 |
| PVX_000665 | -0.3961 | -0.277  | -0.2466 | 0.1968  | 0.2056  | 0.1386  | -0.1618 | -0.3898 | -0.4584 |
| PVX_122820 | 0.8089  | 0.1798  | 0.2174  | -0.1655 | 0.2978  | 0.3093  | 0.3107  | 0.3404  | 0.3153  |
| PVX_079815 | 0.5253  | 0.5953  | 0.4472  | 0.1385  | -0.2254 | -0.5913 | -0.8242 | -0.8766 | -0.3065 |
| PVX_082815 | 0.3849  | -0.1802 | -0.4592 | -0.5482 | -0.7257 | -0.4284 | 1.2283  | 0.9538  | 1.0161  |
| PVX_001855 | 0.2379  | 0.3149  | 0.5726  | 0.5929  | 0.3419  | 0.1565  | -0.1674 | 0.545   | 0.4238  |
| PVX_002600 | 0.3387  | -0.021  | -0.0385 | -0.2274 | -0.3381 | -0.3336 | -0.1125 | 0.3541  | 0.5188  |
| PVX_079925 | -0.8373 | -0.9381 | -0.7194 | 0.0364  | 0.4487  | 0.8288  | 0.3948  | -0.1883 | -0.5488 |
| PVX_083020 | -0.1179 | 0.4615  | 0.4947  | 0.6549  | 0.6054  | -0.2185 | -0.6984 | -0.6902 | -0.5554 |
| PVX_119455 | -0.3558 | -0.5848 | -0.2588 | 0.198   | 0.7603  | 0.625   | 0.0928  | 0.0824  | -0.1163 |
| PVX_113675 | -0.2794 | -0.3273 | -0.3306 | -0.106  | -0.0199 | -0.0643 | 0.0579  | -0.4666 | -0.5981 |
| PVX_092640 | 0.4301  | 0.3014  | -0.0692 | -0.1531 | 0.1235  | 0.6352  | 0.5146  | 0.559   | 0.5975  |
| PVX_117705 | -0.92   | -1.0793 | -1.5403 | -1.8219 | -0.6636 | 0.1624  | -0.0236 | -0.0275 | 0.218   |
| PVX_090225 | 0.6755  | 0.4492  | 0.2273  | -0.2985 | -0.4746 | -0.4194 | -0.2108 | 0.7341  | 1.2391  |
| PVX_001100 | -1.5554 | -1.6085 | -1.7046 | -1.9988 | -2.2675 | -2.0226 | -1.1984 | 1.3098  | 1.5268  |
| PVX_094475 | -0.4633 | -0.013  | 0.0478  | 0.2422  | 0.2534  | 0.0135  | -0.3987 | 0.2084  | -0.2041 |
| PVX_099600 | -0.1943 | 0.1088  | 0.4164  | 0.455   | 0.636   | 0.1051  | -0.1083 | 0.1286  | 0.2203  |
| PVX_101465 | 0.7376  | 0.2338  | 0.1165  | -0.2034 | -0.0432 | -0.2077 | -0.7835 | -0.773  | -0.4383 |
| PVX_098945 | -0.3305 | -0.0708 | -0.1642 | -0.0427 | 0.1615  | 0.505   | -0.1503 | -0.4108 | -0.3922 |
| PVX_081350 | -0.4494 | -0.2242 | 0.2357  | 0.2884  | 0.2876  | 0.0499  | -0.412  | -0.2345 | -0.2124 |
| PVX_117340 | 0.2122  | 0.1438  | -0.0328 | -0.084  | 0.1004  | 0.0115  | -0.4058 | 0.031   | -0.1036 |
| PVX_118400 | 0.1859  | -0.2015 | -0.0857 | 0.028   | 0.1531  | 0.1585  | 0.5059  | 0.4778  | 0.8061  |
| PVX_115470 | 1.2782  | 0.928   | 0.5836  | -0.0191 | -0.7524 | -2.4284 | -2.5096 | -1.7799 | -1.0291 |
| PVX_100945 | -0.3423 | 0.4249  | 0.3498  | 0.5344  | 0.3949  | 0.4386  | 0.2217  | 0.0104  | -0.2232 |
| PVX_085950 | 0.1648  | 0.7451  | 0.6817  | 0.6434  | 0.5625  | 0.2599  | -0.3514 | -0.7069 | -0.4229 |
| PVX_094930 | -0.7546 | -0.5691 | -0.2096 | 0.2368  | 0.4401  | 0.432   | -0.1778 | -0.1541 | -0.3175 |
| PVX_088990 | 0.9892  | 0.5197  | 0.1759  | -0.2709 | -0.6179 | -0.4217 | 0.0178  | 0.7992  | 1.3322  |
| PVX_081255 | -0.8122 | 0.3299  | 0.3805  | 0.5745  | 0.2633  | 0.0816  | -0.6812 | -0.8216 | -0.8671 |
| PVX_080350 | -0.222  | -0.679  | -0.6291 | 0.0031  | 0.5381  | 0.6121  | 0.7402  | 0.2043  | 0.0681  |
| PVX_084370 | 0.6332  | 0.733   | 0.017   | -0.1529 | -0.1634 | -0.1998 | 0.1422  | 0.6278  | 0.8125  |
| PVX_092240 | -0.1263 | 0.079   | 0.1247  | 0.2797  | 0.5577  | 0.7232  | 0.0437  | -0.2229 | -0.1714 |
| PVX_087795 | 0.4604  | 0.4873  | 0.249   | -0.1258 | 0.0723  | 0.0587  | -0.1804 | 0.054   | 0.0538  |
| PVX_099340 | 0.0625  | -0.2107 | -0.335  | -0.0381 | 0.166   | 0.301   | 0.4975  | 0.4798  | 0.4693  |
| PVX_124155 | 0.7921  | 0.5142  | 0.1989  | -0.1893 | -0.7341 | -0.7201 | -0.351  | 0.4446  | 0.3582  |
| PVX_089970 | -0.5414 | 0.1903  | 0.3707  | 0.5726  | 0.2186  | -0.3104 | -0.949  | -0.9333 | -0.96   |
| PVX_119580 | 0.6617  | 0.7624  | 0.7839  | 0.8251  | 0.6521  | -0.0251 | -0.1483 | -0.0274 | -0.0375 |
| PVX_098060 | 0.8658  | 0.2691  | -0.1054 | -0.2679 | -0.182  | -0.3022 | 0.2104  | 0.6471  | 0.9448  |
| PVX_119300 | 0.2657  | -0.5744 | -0.7741 | -0.3307 | 0.5071  | 0.9633  | 0.6335  | 0.2855  | 0.3746  |



**P. knowlesi (PkHa)**

| geneid     | TP01    | TP02    | TP03    | TP04    | TP05    | TP06    | TP07    |
|------------|---------|---------|---------|---------|---------|---------|---------|
| PKH_061420 | -0.9705 | -1.0365 | -0.5599 | -0.6986 | -0.378  | -0.1706 | -0.1326 |
| PKH_123440 | -0.218  | -0.1141 | -0.0091 | 0.14056 | -0.0073 | 0.16027 | -0.0595 |
| PKH_144570 | 0.5422  | 0.55808 | 0.60537 | 0.44452 | 0.20975 | 0.09948 | 0.09104 |
| PKH_142000 | 0.07047 | 0.0337  | -0.0367 | -0.0198 | -0.0685 | -0.0729 | 0.19622 |
| PKH_140040 | 0.76449 | 0.46424 | -0.1926 | -0.8704 | -0.7273 | 0.35082 | 1.14504 |
| PKH_122070 | -0.111  | -0.4607 | -0.4485 | -0.4517 | 0.24497 | -0.2573 | -1.0051 |
| PKH_011350 | -0.3735 | -0.1045 | -0.1705 | -0.2656 | -0.1449 | -0.2876 | -0.4845 |
| PKH_051260 | 1.17521 | 1.15253 | 1.37495 | 0.64572 | 1.10145 | 1.16745 | 1.11938 |
| PKH_060470 | 0.19831 | 0.10755 | 0.13899 | -0.0856 | -0.1687 | 0.1448  | -0.9066 |
| PKH_060540 | -0.0426 | 0.04507 | -0.4052 | -0.61   | -0.1067 | -0.5205 | -1.0098 |
| PKH_050170 | 0.36213 | 0.30493 | 0.26898 | 0.24451 | 0.21254 | 0.24301 | 0.10827 |
| PKH_130810 | 0.0408  | 0.30063 | 0.27762 | 0.21194 | 0.06579 | -0.2199 | -0.3661 |
| PKH_101240 | -0.4999 | -0.5028 | -0.7428 | -0.7701 | -1.0934 | -1.1296 | -0.8214 |
| PKH_126880 | 0.02478 | 0.20741 | 0.07033 | 0.08663 | 0.31658 | 0.16398 | 0.28851 |
| PKH_114170 | -0.2271 | -0.1785 | 0.12587 | 0.26416 | 0.24885 | 0.37266 | 0.0731  |
| PKH_081250 | 0.27516 | 0.2679  | 0.09793 | 0.122   | 0.09515 | 0.21938 | 0.48204 |
| PKH_130720 | 0.80997 | 0.98724 | 0.90595 | 1.12345 | 0.67935 | 0.44202 | 0.01198 |
| PKH_080760 | 0.14872 | 0.07177 | -0.1959 | 0.09184 | 0.11519 | 0.18821 | 0.39655 |
| PKH_110780 | -0.5103 | -0.3342 | -0.2629 | -0.317  | -0.2837 | -0.3317 | -0.2535 |
| PKH_131190 | -0.1126 | -0.1444 | -0.5198 | -0.2152 | -0.1227 | -0.5184 | -1.9305 |
| PKH_142030 | -0.0212 | 0.17457 | -0.1469 | -0.05   | -0.1033 | -0.0674 | 0.13422 |
| PKH_052300 | -0.9399 | -0.8041 | -1.386  | -1.3184 | -1.5266 | -1.2963 | -1.2915 |
| PKH_143950 | -0.3379 | -0.3162 | -0.0196 | 0.29541 | 0.03726 | 0.25022 | 0.10758 |
| PKH_145520 | 0.03257 | -0.072  | 0.35336 | 0.3871  | 0.39493 | 0.30865 | 0.13206 |
| PKH_101270 | -0.4506 | -0.634  | -0.6179 | -0.6954 | -0.534  | -0.2293 | -0.1878 |
| PKH_031400 | -0.1352 | 0.1057  | 0.20701 | -0.0059 | -0.2447 | 0.02001 | -0.062  |
| PKH_143000 | 1.64052 | 1.3582  | 1.53903 | 0.64366 | 1.28978 | 1.04105 | 1.17728 |
| PKH_083310 | 0.34945 | 0.51323 | 0.33835 | 0.21062 | -0.0894 | -0.1452 | -0.1532 |
| PKH_031050 | -0.8879 | -0.3859 | -0.2662 | -0.2212 | -0.129  | -0.4991 | -1.5753 |
| PKH_040380 | 0.31318 | 0.33578 | 0.16767 | 0.22145 | 0.17281 | 0.01635 | -1.1626 |
| PKH_126940 | 1.23886 | 0.96176 | 1.23975 | 0.97312 | 0.63826 | 0.83066 | 0.53415 |
| PKH_113750 | 0.42013 | 0       | 0.16358 | 0.1378  | 0.1167  | 0.18735 | 0.32688 |
| PKH_011770 | 0.0834  | 0.02745 | 0.11073 | 0.07919 | -0.0286 | 0.10398 | -1.0301 |
| PKH_131660 | -0.0442 | 0.03725 | 0.27131 | 0.23393 | -0.0458 | 0.12624 | 0.15239 |
| PKH_031630 | -0.2152 | -0.495  | -0.71   | -0.8371 | -0.8478 | -0.6497 | -0.0788 |
| PKH_144170 | 1.3009  | 1.42798 | 1.26132 | 0.51088 | 0.92398 | 1.02577 | 1.46399 |
| PKH_020670 | -1.4656 | -1.3876 | -1.3435 | -1.1734 | -1.1217 | -1.2771 | -2.0567 |
| PKH_146890 | -0.2606 | -0.1405 | -0.4428 | 0.06251 | -0.3818 | -0.2199 | -1.0706 |
| PKH_145970 | 0.18387 | 0.37218 | 0.14506 | 0.11722 | 0.36079 | -0.1482 | 0.01888 |
| PKH_092910 | -0.3466 | -0.2755 | -0.2901 | -0.3583 | -0.3304 | -0.368  | -0.4352 |
| PKH_040760 | -0.3762 | -0.3506 | -0.2644 | -0.3124 | -0.3707 | -0.0328 | -0.0795 |
| PKH_125470 | -0.5191 | -0.3007 | -0.4404 | -0.4179 | -0.3381 | -0.403  | -0.5804 |
| PKH_021090 | -1.0302 | -1.1321 | -0.81   | -0.8183 | -0.6331 | -0.486  | -1.4008 |
| PKH_020950 | -0.1005 | -0.0631 | 0.09338 | 0.21085 | 0.08224 | 0.07527 | -0.6277 |
| PKH_020940 | -0.2773 | -0.2341 | -0.433  | -0.3946 | -0.7488 | -0.8556 | -1.0187 |
| PKH_072230 | 0.67795 | 0.47328 | 0.25545 | -0.1684 | -0.1744 | -0.2021 | 0.06384 |
| PKH_040520 | 0.05193 | -0.3287 | -0.252  | -0.0526 | 0.35904 | 0.60636 | 0.71351 |
| PKH_081330 | -0.5231 | -0.8317 | -0.7096 | -0.3601 | 0.29005 | 0.6437  | 0.54086 |
| PKH_122650 | 0.29184 | 0.37321 | 0.32647 | 0.15725 | 0.07251 | 0.05516 | 0.2048  |
| PKH_102530 | -0.1416 | -0.1781 | -0.1147 | -0.0928 | -0.2323 | -0.2316 | -0.4081 |
| PKH_126610 | 0.37925 | 0.43892 | 0.25784 | 0.29103 | 0.12495 | 0.05585 | -1.3085 |
| PKH_123790 | 0.23088 | 0.44089 | 0.27722 | 0.13485 | 0.02456 | -0.0655 | 0.0573  |
| PKH_102300 | -0.1668 | -0.0288 | 0.17462 | 0.31698 | 0.22994 | 0.50506 | 0.105   |
| PKH_072520 | 0.12727 | 0.06846 | -0.045  | -0.3712 | -0.0047 | -0.0815 | 0.09512 |
| PKH_070400 | 0.08971 | 0.32557 | 0.1711  | -0.3074 | -0.2337 | -0.3187 | -0.2993 |
| PKH_093840 | 0.7615  | 0.84436 | 0.66282 | 0.24617 | 0.71248 | 0.64448 | 1.81394 |
| PKH_071170 | -0.0309 | 0.02447 | 0.00369 | 0.02221 | 0.08956 | 0.09028 | 0.17389 |
| PKH_041670 | -1.139  | -0.9579 | -0.9932 | -1.0182 | -1.0059 | -1.2193 | -1.4428 |
| PKH_082320 | 0.64494 | 0.28766 | -0.0938 | -0.3511 | -0.4139 | -0.4699 | -0.1735 |
| PKH_142050 | -0.2235 | -0.1348 | 0.16708 | 0.61692 | 0.82587 | 0.74948 | 0.89342 |
| PKH_061180 | 0.14483 | 0.30206 | 0.22576 | 0.29419 | -0.0731 | -0.2456 | -0.0926 |



|            |         |         |         |         |         |         |         |
|------------|---------|---------|---------|---------|---------|---------|---------|
| PKH_070350 | -0.6018 | 0.79328 | 0.8393  | 0.64929 | 0.43053 | 0.29033 | 0.14791 |
| PKH_123410 | 0.23781 | 0.37779 | 0.60147 | 0.70453 | 0.51778 | 0.43415 | 0.66758 |
| PKH_144800 | -0.7714 | -0.8806 | -1.0362 | -0.9284 | -0.733  | -0.5711 | -0.2453 |
| PKH_083080 | 0.20278 | 0.09177 | -0.0245 | 0.02981 | -0.048  | -0.1535 | -0.2502 |
| PKH_080080 | 0.3293  | 0.34171 | 0.09081 | -0.3912 | -0.055  | -0.1222 | -0.1065 |
| PKH_142190 | 0.83269 | 1.02029 | 1.06224 | 1.24983 | 0.99989 | 0.89651 | 1.03043 |
| PKH_081450 | -0.4448 | -0.5433 | -0.4839 | -0.7213 | -0.4777 | -0.4958 | -0.1508 |
| PKH_144050 | 0.95931 | 1.26222 | 1.14686 | 1.15848 | 0.77222 | 0.47444 | 0.31624 |
| PKH_130560 | 0.33147 | 0.25183 | 0.23065 | 0.20848 | 0.05266 | 0.12345 | 0.24592 |
| PKH_102140 | -0.5261 | -0.9685 | -0.6777 | -0.1055 | 0.63229 | 0.8719  | 0.86559 |
| PKH_091270 | 0.25461 | 0.70696 | 0.96194 | 0.832   | 0.53427 | 0.08248 | -0.0914 |
| PKH_125360 | 0.00084 | 0.02284 | 0.19507 | 0.33769 | 0.32658 | 0.4414  | 0.36442 |
| PKH_040500 | -1.0318 | -1.7005 | -1.6068 | -0.5243 | 0.66583 | 1.07389 | 0.57315 |
| PKH_145930 | -1.4737 | -0.3536 | -0.307  | -0.4073 | -0.398  | -0.4816 | -1.1059 |
| PKH_030740 | 0.3829  | 0.40076 | 0.13749 | -0.1094 | -0.4569 | -0.1667 | 0.35431 |
| PKH_050550 | 0.6605  | 0.70636 | 0.69074 | 0.43168 | 0.3378  | 0.49013 | 0.73538 |
| PKH_080960 | -0.6703 | -0.4576 | -0.5424 | -0.5898 | -0.4301 | -0.2511 | -0.5159 |
| PKH_122920 | 0.17143 | 0.05166 | 0.02707 | -0.0999 | -0.2884 | -0.4172 | -0.0038 |
| PKH_101640 | -0.6918 | -0.677  | -0.8899 | -0.7817 | -0.5747 | -0.552  | -0.3552 |
| PKH_130280 | 0.30098 | 0.55426 | 0.70881 | 1.00983 | 0.76387 | 0.65981 | 0.54194 |
| PKH_122420 | 0.46195 | 0.38991 | 0.22767 | 0.02635 | -0.0854 | -0.1457 | -0.1077 |
| PKH_080280 | -0.5717 | -0.6281 | -0.6067 | -0.4663 | -0.1505 | -0.557  | -1.5249 |
| PKH_072030 | -0.4801 | -0.3077 | -0.2794 | -0.1035 | 0.10798 | 0.11655 | -0.1314 |
| PKH_091570 | -0.343  | -0.2387 | -0.265  | -0.1746 | -0.3458 | -0.4628 | -0.5274 |
| PKH_072060 | 0.52693 | 0.37601 | 0.2649  | 0.16988 | 0.1088  | 0.33644 | 0.74099 |
| PKH_125730 | -0.6582 | -0.7593 | -0.6268 | -0.8974 | -0.553  | -0.4048 | -0.0292 |
| PKH_011050 | -0.619  | -1.0113 | -1.2729 | -0.4814 | 0.14487 | 0.49068 | 0.14773 |
| PKH_124660 | -0.1641 | -0.0983 | -0.2091 | -0.0777 | -0.1752 | -0.0592 | -1.4279 |
| PKH_031800 | 0.61824 | 0.84802 | 0.77683 | 0.46477 | 0.23314 | -0.107  | -0.2148 |
| PKH_140450 | -0.646  | -0.5969 | -0.3775 | -0.1186 | 0.08719 | 0.02139 | 0.04585 |
| PKH_040950 | 0.03192 | -0.3338 | -0.2508 | -0.027  | 0.81241 | 1.43907 | 1.61982 |
| PKH_143410 | 1.15588 | 1.46489 | 1.55956 | 1.94766 | 1.14121 | 0.70285 | 0.67533 |
| PKH_143770 | 0.10882 | 0.19785 | 0.33378 | 0.49389 | 0.43234 | 0.19283 | -1.0398 |
| PKH_141750 | -0.2102 | -0.0452 | 0.19292 | 0.32662 | 0.35438 | 0.23049 | 0.00185 |
| PKH_143180 | 0.16795 | 0.47498 | 0.46112 | 0.52424 | -0.0362 | -0.1472 | 0.06537 |
| PKH_092240 | 0.11199 | 0.12438 | 0.44579 | 0.5053  | 0.7724  | 0.70027 | 0.24188 |
| PKH_111580 | 0.28989 | 0.14517 | 0.25912 | 0.14636 | 0.15479 | 0.19062 | 0.17474 |
| PKH_112840 | 0.67984 | 0.68608 | 0.68035 | 0.71153 | 0.4788  | 0.29417 | 0.25922 |
| PKH_120880 | -0.8495 | -0.7221 | -0.8426 | -0.9705 | -0.5333 | -0.2163 | -0.1378 |
| PKH_020210 | -0.4461 | -0.4334 | -0.2793 | -0.1424 | -0.0564 | -0.2043 | 0.03924 |
| PKH_080370 | 1.02312 | 0.66615 | 0.39114 | 0.18128 | 0.09861 | 0.19946 | 0.71553 |
| PKH_111800 | 0.14529 | 0.10315 | -0.1019 | -0.0681 | 0.16318 | 0.01775 | 0.41997 |
| PKH_123010 | 0.55296 | 0.36134 | 0.2599  | 0.32075 | 0.41738 | 0.24854 | 0.76164 |
| PKH_080290 | -1.0033 | -1.1962 | -1.4651 | -1.3854 | -0.8376 | -0.4302 | -0.6895 |
| PKH_110550 | 0.61077 | 0.56091 | 0.45868 | 0.15813 | 0.00956 | -0.1745 | 0.31085 |
| PKH_102470 | 0.25886 | 0.37911 | 0.4792  | 0.40822 | 0.94771 | 0.82704 | 1.08532 |
| PKH_062090 | 0.34506 | 0.38172 | 0.27519 | 0.29401 | 0.0651  | -0.102  | -0.1851 |
| PKH_051700 | -0.6878 | -0.1659 | 0.58315 | 1.16302 | 1.0259  | 0.68296 | 0.19449 |
| PKH_031860 | -0.1574 | -0.0508 | -0.0931 | -0.1732 | -0.1402 | -0.2595 | -0.2638 |
| PKH_090110 | 0.68676 | 0.90695 | 0.64993 | 0.57127 | 0.46747 | 0.1641  | -0.0071 |
| PKH_090720 | 0.11506 | -0.1484 | -0.3708 | -0.5135 | -0.5604 | -0.5622 | -0.1607 |
| PKH_083610 | -0.5691 | -0.764  | -0.9439 | -0.5261 | 0.10187 | 0.3635  | 0.25216 |
| PKH_070790 | 0.22057 | 0.11434 | 0.20812 | 0.73621 | 0.68021 | 0.97979 | 0.93959 |
| PKH_010730 | -0.8119 | -0.8064 | -0.7671 | -1.1319 | -1.0623 | -1.3764 | -1.938  |
| PKH_132100 | 0.03442 | 0.09529 | 0.26265 | 0.32983 | 0.2179  | 0.33073 | -0.7007 |
| PKH_123500 | 0.68445 | 0.62626 | 0.80216 | 0.78157 | 0.40391 | 0.58215 | 0.62835 |
| PKH_123920 | 0.62986 | 0.24377 | 0.24937 | 0.10338 | 0.15589 | 0.20398 | 0.39537 |
| PKH_112180 | 0.86028 | 1.0378  | 0.90271 | 0.75473 | 0.66533 | 0.5059  | 0.73971 |
| PKH_141480 | 0.77132 | 0.68664 | 0.67223 | 0.83914 | 0.81825 | 0.69469 | 0.85427 |
| PKH_122210 | 0.83154 | 1.03414 | 0.98265 | 0.8345  | 0.32702 | 0.09651 | -0.0297 |
| PKH_112520 | -0.3453 | 0.10451 | 0.02493 | 0.1389  | -0.0143 | -0.0598 | -1.1735 |
| PKH_111710 | 0.33269 | 0.40543 | 0.33552 | 0.38076 | 0.20284 | 0.20879 | -0.1333 |
| PKH_126470 | -1.0839 | -1.2693 | -1.4755 | -1.3813 | -0.8649 | -0.479  | -0.4491 |

|            |         |         |         |         |         |         |         |
|------------|---------|---------|---------|---------|---------|---------|---------|
| PKH_113260 | -0.1727 | -0.1506 | -0.0422 | -0.1619 | -0.2147 | -0.201  | -1.5471 |
| PKH_100300 | 0.22229 | 0.34678 | 0.27657 | 0.07511 | 0.2223  | 0.12471 | 0.08291 |
| PKH_031290 | -0.2872 | -0.0731 | -0.2183 | -0.2725 | -0.5384 | -0.7188 | -1.3758 |
| PKH_123550 | 0.08351 | 0.19106 | 0.37215 | 0.48594 | 0.50557 | 0.01191 | -0.1969 |
| PKH_125330 | 0.23043 | 0.23315 | 0.30394 | 0.44781 | 0.58558 | 0.56364 | 0.72279 |
| PKH_072080 | -0.0262 | 0.3148  | -0.057  | 0.15978 | -0.3062 | -0.3326 | -1.0688 |
| PKH_146700 | -0.0379 | -0.1559 | -0.1272 | -0.0617 | 0.13702 | 0.1171  | 0.1053  |
| PKH_030830 | 0.16916 | 0.16897 | 0.24481 | 0.13847 | -0.0772 | -0.2022 | -0.2224 |
| PKH_144990 | 0.6199  | 0.8732  | 0.86813 | 0.63513 | 0.79692 | 0.98917 | 1.14933 |
| PKH_082820 | 0.46233 | 0.33916 | 0.33501 | 0.18028 | 0.24437 | -0.0123 | -0.3577 |
| PKH_140940 | -0.2742 | -0.1163 | -0.1199 | 0.12719 | -0.2174 | -0.227  | -0.0485 |
| PKH_102840 | -1.5614 | -1.4779 | -1.4184 | -1.382  | -1.5811 | -1.5204 | -1.5149 |
| PKH_140520 | 0.07502 | -0.2041 | -0.3206 | -0.8566 | -0.6709 | -0.4194 | -0.0108 |
| PKH_133720 | 0.17071 | 0.3214  | 0.49694 | 0.349   | 0.15942 | 0.19823 | -0.942  |
| PKH_100900 | 0.29057 | 0.15186 | 0.12403 | 0.1821  | 0.15871 | 0.135   | -1.0736 |
| PKH_030200 | 0.19472 | 0.35727 | 0.26316 | 0.03556 | -0.1862 | -0.5953 | -1.0092 |
| PKH_051480 | -0.4291 | -0.3898 | -0.3855 | -0.3189 | -0.0813 | 0.01515 | -0.0709 |
| PKH_144790 | -0.2529 | -0.4273 | -0.3966 | -0.3832 | -0.2169 | -0.2019 | -0.1168 |
| PKH_101730 | -0.772  | -0.6296 | -0.6769 | -0.5812 | -0.5663 | -0.6543 | -1.8377 |
| PKH_072930 | -0.062  | 0.11108 | -0.0146 | 0.12741 | 0.04875 | -0.1093 | -0.1356 |
| PKH_120900 | -0.1697 | 0.25309 | 0.70224 | 0.63112 | 0.93459 | 0.76067 | -0.0136 |
| PKH_051180 | -0.3018 | -0.4055 | -0.4273 | -0.3483 | -0.2295 | -0.3413 | -0.53   |
| PKH_110430 | 0.3915  | 0.24634 | 0.14727 | 0.05297 | -0.0099 | -0.0916 | -0.0473 |
| PKH_040270 | -0.6034 | -0.5588 | -0.6353 | -0.4167 | -0.7629 | -0.7966 | -1.2088 |
| PKH_133730 | -0.5136 | -0.899  | -1.1088 | -0.2365 | 0.58467 | 1.34309 | 1.18173 |
| PKH_133370 | 0.17218 | 0.44601 | 0.43946 | 0.66009 | 0.46976 | 0.53283 | 0.43599 |
| PKH_110680 | 0.2743  | 0.50423 | 0.51278 | 0.52454 | 0.43031 | 0.10813 | 0.35846 |
| PKH_123650 | 0.36719 | 0.28748 | 0.21931 | 0.07233 | -0.2084 | -0.2367 | -0.2839 |
| PKH_052280 | -0.205  | -0.3397 | -0.4379 | -0.2866 | -0.4048 | -0.5133 | -1.6125 |
| PKH_052770 | 0.899   | 0.39816 | -0.0687 | -0.6414 | -0.2734 | 0.86688 | 1.46521 |
| PKH_061740 | 0.13559 | -0.0366 | 0.01321 | -0.0965 | -0.0503 | 0.07966 | 0.46741 |
| PKH_133780 | -0.2866 | -0.4255 | -0.3451 | -0.3769 | -0.483  | -0.4134 | -0.2899 |
| PKH_094120 | 0.17004 | 0.40077 | 0.58935 | 0.62742 | 0.18683 | 0.11204 | -0.043  |
| PKH_126960 | -0.2355 | -0.224  | -0.514  | -0.4396 | -0.436  | -0.4081 | -0.0894 |
| PKH_000770 | -0.2074 | -0.3435 | -0.3482 | -0.2304 | -0.3705 | 0.07578 | -1.3597 |
| PKH_140210 | 0.59319 | 0.66749 | 0.74993 | 0.82047 | 0.38093 | 0.37052 | 0.38578 |
| PKH_120270 | 0.04762 | 0.02197 | 0.15509 | 0.05235 | 0.08723 | 0.0773  | -0.0303 |
| PKH_052160 | 0.15465 | 0.35445 | 0.30067 | 0.23708 | 0.18223 | 0.1955  | 0.30772 |
| PKH_050330 | 0.40256 | 0.30793 | 0.31833 | 0.48342 | 0.59214 | 0.5306  | 0.09979 |
| PKH_132850 | 0.38877 | 0.2876  | 0.26518 | 0.27004 | 0.2916  | 0.2083  | 0.50711 |
| PKH_091640 | -0.1179 | -0.0365 | -0.1852 | -0.3991 | -0.3636 | -0.5978 | -2.3484 |
| PKH_125060 | -0.1623 | 0.02176 | -0.021  | -0.0888 | 0.07315 | 0.07768 | -0.1971 |
| PKH_125720 | -1.024  | -0.8983 | -0.4771 | 0.10191 | 0.74709 | 0.75258 | 0.63212 |
| PKH_131080 | -0.2462 | -0.5038 | -0.8497 | -0.8861 | -0.7224 | -0.8548 | -0.5482 |
| PKH_041050 | 0.41755 | 0.30621 | 0.25867 | 0.39796 | 0.66234 | 0.6813  | 0.79246 |
| PKH_091770 | 0.80202 | 0.51439 | 0.48094 | 0.38209 | 0.44485 | 0.39816 | 0.48497 |
| PKH_061000 | 0.61024 | 0.7615  | 1.42525 | 0.92066 | 0.99075 | 0.62263 | 0.23432 |
| PKH_073360 | 0.49338 | -0.0365 | -0.3572 | -0.3057 | 0.08208 | 0.78419 | 0.99831 |
| PKH_131715 | 0.32779 | -0.0143 | 0.11804 | 0.24852 | 0.31578 | 0.66606 | 0.81063 |
| PKH_123150 | 0.25394 | 0.15082 | 0.122   | -0.0032 | 0.08446 | 0.2763  | 0.84866 |
| PKH_145500 | 0.04476 | -0.0148 | -0.0244 | -0.1262 | -0.0215 | 0.06034 | 0.33452 |
| PKH_070030 | 0.236   | 0.13365 | 0.14323 | 0.36153 | 0.04267 | -0.2149 | 0.11567 |
| PKH_130860 | -0.6444 | -0.3202 | 0.09737 | 0.13716 | 0.23766 | 0.02075 | -0.966  |
| PKH_101330 | 0.37243 | 0.54939 | 0.33353 | 0.37924 | 0.42607 | 0.4839  | 0.66706 |
| PKH_090340 | -0.3438 | -0.2149 | -0.1641 | -0.4304 | -0.3014 | -0.3506 | -0.5661 |
| PKH_080400 | 0.01673 | 0.09129 | -0.1378 | 0.04001 | -0.0623 | 0.01283 | -0.9035 |
| PKH_122700 | -0.2102 | -0.1019 | 0.11125 | 0.30729 | 0.19542 | 0.18052 | 0.43039 |
| PKH_143850 | 0.20812 | -0.2085 | -0.6416 | -0.9969 | -0.691  | 0.3816  | 0.80056 |
| PKH_112810 | 0.23864 | 0.02387 | 0.00264 | -0.2362 | -0.0456 | 0.01226 | 0.48257 |
| PKH_140380 | 0.90469 | 0.72048 | 0.74878 | 0.76829 | 0.42444 | 0.28167 | -0.4287 |
| PKH_113850 | 0.66957 | 0.68752 | 0.7076  | 0.53043 | 0.4861  | -0.0281 | 0.25677 |
| PKH_140710 | 0.25961 | 0.1388  | 0.06107 | -0.2531 | -0.2429 | -0.2799 | 0.23823 |
| PKH_070250 | -0.6628 | -0.8132 | -0.6885 | -0.6643 | -0.6692 | -0.7858 | -2.2756 |

|            |         |         |         |         |         |         |         |
|------------|---------|---------|---------|---------|---------|---------|---------|
| PKH_072700 | -1.7625 | -1.6244 | -1.6528 | -1.9281 | -1.612  | -1.5882 | -1.2119 |
| PKH_031010 | -0.4534 | -0.4174 | -0.5133 | -0.4153 | -0.4808 | -0.372  | -0.6339 |
| PKH_091810 | -0.419  | -0.4188 | -0.5289 | -0.5992 | -0.6548 | -0.5822 | -0.3395 |
| PKH_071310 | -0.1628 | -0.0524 | -0.0816 | -0.0161 | -0.1868 | -0.0594 | -1.479  |
| PKH_081950 | -0.371  | -0.4695 | -0.2417 | -0.0052 | 0.07768 | 0.36993 | 0.58121 |
| PKH_112050 | -0.4784 | -0.3124 | -0.1371 | -0.1283 | -0.4584 | -0.5539 | -2.4427 |
| PKH_080970 | 0.56729 | 0.48854 | 0.26565 | 0.23266 | 0.09783 | -0.3478 | -0.2746 |
| PKH_144520 | 0.06194 | 0.17471 | -0.0184 | -0.2379 | -0.914  | -1.0134 | -0.9841 |
| PKH_120820 | 0.42236 | 0.98913 | 0.80617 | 0.76139 | 0.57918 | 0.23088 | 0.00844 |
| PKH_021290 | -1.1577 | -0.6085 | -0.3607 | -0.1989 | -0.2595 | -0.301  | -1.7288 |
| PKH_040940 | 0.56979 | 0.51992 | 0.5194  | 0.36247 | 0.39031 | 0.9478  | 1.00379 |
| PKH_111990 | 0.30874 | 0.41101 | 0.12272 | 0.21419 | 0.64169 | 0.45805 | 0.58689 |
| PKH_090680 | -1.1271 | -1.1885 | -0.7851 | -1.1598 | -0.5949 | -0.3841 | -0.068  |
| PKH_143540 | -0.156  | -0.1909 | -0.1433 | -0.1228 | -0.1568 | -0.0522 | 0.17575 |
| PKH_050280 | 0.29218 | 0.17504 | 0.44614 | 0.19925 | 0.26069 | 0.26701 | 0.64773 |
| PKH_011440 | -0.7362 | -1.0557 | -1.0802 | -1.2124 | -1.1347 | -0.8072 | -0.621  |
| PKH_041210 | -1.9393 | -1.6308 | -0.6997 | -0.1345 | 0.15022 | 0.21908 | -0.3885 |
| PKH_040180 | -1.2909 | -0.7992 | -0.718  | -0.8329 | -0.6019 | -0.9822 | -1.6258 |
| PKH_126230 | 0.32483 | 0.20313 | 0.20269 | 0.50927 | 0.81443 | 0.61309 | 0.53954 |
| PKH_132430 | 0.38315 | 0.30773 | 0.14432 | 0.04716 | -0.4038 | -0.3101 | -0.0159 |
| PKH_146080 | -0.1252 | -0.2569 | -0.1385 | 0.14803 | 0.15774 | 0.27104 | 0.33788 |
| PKH_132730 | -0.2729 | -0.2705 | -0.1488 | -0.0039 | -0.2006 | -0.0815 | -0.1785 |
| PKH_102610 | 0.52788 | 0.34935 | 0.20223 | 0.03789 | -0.0064 | 0.16126 | 0.10868 |
| PKH_040700 | -0.3505 | -0.1172 | -0.1356 | -0.0121 | -0.7806 | -0.8917 | -0.9074 |
| PKH_050750 | -0.2814 | -0.2297 | -0.3466 | -0.2107 | -0.119  | -0.3118 | -1.0403 |
| PKH_091560 | 0.29617 | -0.0116 | -0.1114 | -0.0227 | -0.2017 | -0.3152 | -0.481  |
| PKH_090260 | -0.1736 | -0.308  | -0.5256 | -0.84   | -0.9584 | -0.9658 | -0.8694 |
| PKH_050610 | 0.22205 | 0.06152 | 0.11743 | -0.151  | 0.03458 | -0.1334 | -0.2518 |
| PKH_125160 | 0.11989 | 0.13513 | 0.05318 | 0.30383 | 0.18399 | 0.21584 | 0.41221 |
| PKH_111140 | 0.72261 | 0.56081 | 0.72524 | 0.5659  | 0.35145 | 0.0402  | -0.2219 |
| PKH_120730 | -0.4535 | -0.4902 | -0.8505 | -0.453  | -0.2861 | -0.4688 | -1.6948 |
| PKH_090830 | 0.54875 | 0.54781 | 0.63196 | 0.56905 | 0.27397 | 0.52913 | 0.31591 |
| PKH_111240 | -0.3666 | -0.2433 | 0.31205 | 0.76721 | 0.76118 | 0.71312 | 0.42966 |
| PKH_020770 | 0.15514 | 0.00587 | -0.1578 | -0.3198 | 0.15691 | 0.02545 | 0.04977 |
| PKH_111120 | 0.53708 | 0.09668 | -0.1577 | -0.279  | -0.5104 | -0.3429 | -0.74   |
| PKH_110120 | -0.0459 | 0.14181 | 0.23111 | 0.24458 | 0.34273 | 0.18885 | -1.2592 |
| PKH_131540 | -0.247  | 0.12019 | 0.31075 | 0.1209  | -0.0194 | 0.16707 | 0.5243  |
| PKH_091860 | 0.70599 | 0.7343  | 0.72816 | 0.56512 | 0.47304 | 0.1545  | 0.17386 |
| PKH_081280 | 0.95229 | 1.01415 | 0.94504 | 0.95482 | 0.90704 | 0.79268 | 0.75736 |
| PKH_100760 | -0.122  | 0.01082 | 0.15459 | 0.25638 | 0.07319 | 0.18896 | -1.4079 |
| PKH_090180 | -0.3712 | -0.1684 | -0.4625 | -0.2159 | -0.1055 | -0.4215 | -0.9554 |
| PKH_011070 | -0.1888 | -0.2773 | -0.3888 | -0.4405 | -0.2669 | -0.1673 | -0.1879 |
| PKH_111080 | -0.2791 | 0.04727 | 0.0992  | 0.30947 | -0.2552 | -0.2702 | -0.6078 |
| PKH_010830 | 0.14658 | 0.31376 | 0.33996 | 0.46767 | 0.40856 | 0.26848 | 0.11923 |
| PKH_080570 | 0.77114 | 0.81664 | 0.90672 | 0.99499 | 0.60811 | 0.27539 | 0.58906 |
| PKH_011780 | 0.51095 | 0.39867 | 0.57589 | 0.08794 | 0.20798 | 0.28739 | 0.31909 |
| PKH_111350 | -0.2255 | 0.03848 | -0.2205 | -0.234  | -0.0269 | -0.1483 | 0.14552 |
| PKH_030100 | -0.7833 | -0.9134 | -1.1394 | -1.1609 | -1.1919 | -1.0068 | -0.9116 |
| PKH_141540 | -1.0648 | -1.0004 | -0.6339 | -0.1197 | 0.0032  | 0.09376 | -0.0727 |
| PKH_121590 | -0.0304 | 0.06617 | 0.12218 | 0.16613 | -0.1143 | -0.2474 | -0.1337 |
| PKH_031070 | -0.6629 | -0.5028 | -0.55   | -0.1251 | -0.1918 | -0.0526 | -0.4728 |
| PKH_120070 | 0.71334 | 0.33737 | 0.02392 | 0.00288 | 0.00059 | 0.55404 | 1.29656 |
| PKH_142320 | 0.16232 | 0.11704 | 0.15712 | 0.42683 | -0.0947 | -0.1876 | -0.1806 |
| PKH_093780 | -0.1841 | -0.4892 | -0.6246 | -0.2114 | 0.89874 | 1.34364 | 0.7762  |
| PKH_041740 | 0.74785 | 0.30195 | -0.0018 | 0.00684 | -0.0858 | 0.64235 | 1.29013 |
| PKH_126950 | -0.1701 | -0.0592 | 0.02806 | 0.07919 | -0.0235 | -0.2167 | -0.4267 |
| PKH_081460 | 0.46615 | 0.34334 | 0.44754 | 0.37088 | 0.69729 | 0.59904 | 0.49519 |
| PKH_121190 | -0.0238 | -0.4838 | -0.8833 | -0.8305 | -0.3072 | 0.71535 | 0.74745 |
| PKH_073130 | 0.71866 | 0.39254 | 0.22195 | 0.14352 | 0.34619 | 0.71409 | 1.08279 |
| PKH_112890 | 0.06092 | -0.0335 | -0.1571 | -0.3185 | -0.2227 | -0.2151 | -0.2123 |
| PKH_081660 | -0.1995 | -0.3882 | -0.2813 | -0.4489 | -0.2046 | -0.2537 | -0.7462 |
| PKH_091060 | -0.3026 | -0.2023 | -0.3859 | -0.1951 | -0.3437 | -0.3281 | -0.5559 |
| PKH_070480 | 0.83293 | 0.84514 | 0.85045 | 0.63342 | 0.5024  | 0.5032  | 0.45636 |

|            |         |         |         |         |         |         |         |
|------------|---------|---------|---------|---------|---------|---------|---------|
| PKH_146630 | 0.55145 | 0.61875 | 0.51625 | 0.22296 | 0.32578 | 0.37029 | 0.52048 |
| PKH_142930 | 0.06627 | 0.21171 | 0.35546 | 0.62849 | 0.51219 | 0.53196 | 0.4492  |
| PKH_121980 | 0.76645 | 0.97337 | 1.13324 | 1.3204  | 0.96212 | 0.86516 | 0.83907 |
| PKH_132350 | -0.6173 | -0.6278 | -0.5484 | -0.4905 | -0.4653 | -0.1402 | 0.03729 |
| PKH_081880 | -0.7695 | -0.9882 | -0.8908 | -0.954  | -0.5418 | -0.194  | -0.4863 |
| PKH_142440 | 0.58377 | 0.4422  | 0.3509  | 0.25973 | 0.59258 | 0.4691  | 0.9328  |
| PKH_133380 | 0.71219 | 0.56374 | 0.41147 | 0.37061 | 0.3592  | 0.50255 | 0.87871 |
| PKH_140330 | 0.05873 | -0.0172 | 0.08724 | -0.1271 | -0.0963 | -0.0517 | 0.11754 |
| PKH_090290 | -0.2735 | -0.0241 | -0.1472 | -0.1746 | -0.5485 | -0.6269 | -0.7928 |
| PKH_146570 | -0.3942 | -0.2344 | -0.3763 | -0.3771 | -0.3591 | -0.8291 | -0.3432 |
| PKH_010550 | 0.01838 | -0.4586 | -0.3577 | -0.9774 | -0.6492 | -0.9872 | -1.2342 |
| PKH_020130 | 0.42187 | 0.58496 | 0.65041 | 0.60288 | 0.16892 | -0.1831 | -0.7009 |
| PKH_122820 | 0.06312 | 0.05007 | -0.2581 | -0.961  | -1.0725 | -1.4067 | -1.1321 |
| PKH_132720 | 0.7151  | 0.65528 | 0.59167 | 0.79979 | 0.81704 | 0.38576 | 0.71605 |
| PKH_030460 | -0.0655 | -0.4457 | -0.7334 | -0.8543 | -0.7028 | -0.7729 | -0.3813 |
| PKH_083230 | -0.7491 | -0.5341 | -0.2588 | -0.1361 | 0.01427 | 0.10543 | -0.392  |
| PKH_124440 | 0.00871 | 0.36952 | 0.3632  | 0.46302 | 0.05929 | -0.0787 | 0.18645 |
| PKH_092800 | -0.4792 | -0.5387 | -0.2768 | -0.1641 | -0.1822 | -0.2624 | -0.7211 |
| PKH_130630 | -0.208  | -0.2766 | -0.2362 | 0.08059 | 0.16068 | 0.27822 | -0.0441 |
| PKH_031730 | -0.7626 | -0.5128 | -0.843  | -0.9213 | -1.4345 | -1.2957 | -1.5514 |
| PKH_071460 | -0.5273 | -0.588  | -0.7382 | -0.0954 | 0.01889 | -0.1779 | -0.6315 |
| PKH_113530 | -0.3143 | -0.3644 | -0.3817 | -0.1447 | -0.5438 | -0.6315 | -0.5587 |
| PKH_110620 | 0.26917 | 0.5728  | 0.27212 | 0.31887 | 0.23871 | 0.10609 | 0.01993 |
| PKH_082200 | -0.1816 | -0.5754 | -0.3057 | -0.207  | 0.08346 | 0.2947  | 0.47263 |
| PKH_091100 | 0.28791 | 0.5831  | 1.0537  | 1.06087 | 0.95567 | 0.87633 | 0.88985 |
| PKH_133440 | 0.76488 | 0.66258 | 0.96913 | 0.47    | 0.76713 | 0.49606 | 0.95599 |
| PKH_132790 | 0.15107 | 0.18828 | -0.0975 | -0.111  | -0.373  | -0.2417 | 0.15233 |
| PKH_083750 | 0.25811 | 0.26818 | 0.34727 | 0.38247 | 0.14158 | 0.0658  | -0.2239 |
| PKH_071650 | -0.412  | -0.4384 | -0.2628 | -0.3563 | -0.3182 | -0.4566 | -0.6345 |
| PKH_132660 | -0.5888 | -0.4589 | -0.3563 | -0.2021 | -0.058  | 0.08744 | 0.02653 |
| PKH_125970 | -0.1914 | -0.1217 | 0.03852 | 0.42488 | 0.46787 | 0.69433 | 0.59533 |
| PKH_060930 | 0.54019 | 0.6118  | 0.83341 | 0.64935 | 0.43229 | 0.30778 | 0.38197 |
| PKH_126100 | 0.02831 | 0.23478 | 0.51023 | 0.67618 | 0.24915 | 0.16406 | 0.21937 |
| PKH_030610 | -0.5311 | -0.5226 | -0.71   | -0.5211 | -0.5922 | -0.6192 | -2.0548 |
| PKH_102450 | 0.03557 | -0.1166 | -0.0544 | 0.48691 | 0.52075 | 0.34015 | 0.39876 |
| PKH_114800 | -1.1538 | -1.2186 | -1.1064 | -0.9259 | -0.5255 | 0.02855 | 0.17671 |
| PKH_072340 | -0.245  | -0.3987 | -0.2763 | -0.2797 | -0.4228 | -0.2739 | -0.2116 |
| PKH_050410 | 0.298   | 0.47626 | 0.37608 | 0.07131 | -0.0976 | -0.3095 | -0.1428 |
| PKH_134500 | 1.40839 | 1.56878 | 1.42695 | 1.52173 | 0.98241 | 0.82028 | 0.6956  |
| PKH_051210 | 0.73829 | 0.6766  | 0.43206 | 0.04102 | -0.2956 | 0.01105 | 0.68843 |
| PKH_081380 | -1.0563 | -0.9858 | -0.3748 | -0.1873 | 0.21998 | 0.11904 | -0.3445 |
| PKH_145420 | -0.4024 | -0.1367 | 0.35252 | 0.43161 | 0.19004 | 0.11074 | 0.02765 |
| PKH_112470 | -0.5068 | -0.4875 | -0.2784 | -0.3539 | -0.3946 | -0.4824 | -1.939  |
| PKH_140050 | 0.39886 | -0.2508 | -0.5977 | -0.8982 | -0.6022 | 0.46045 | 1.34075 |
| PKH_010870 | 0.40973 | 0.62503 | 0.65644 | 0.65252 | 0.39999 | 0.26259 | -0.0294 |
| PKH_011640 | -0.6809 | -1.0111 | -1.1995 | -1.7969 | -1.7835 | -1.4744 | -1.3844 |
| PKH_030220 | -0.3198 | -0.1749 | 0.77972 | 0.86998 | 0.37784 | -0.0947 | -0.4239 |
| PKH_091400 | -0.04   | -0.016  | 0.13064 | 0.1988  | 0.10512 | 0.18924 | -0.1313 |
| PKH_020990 | -0.4779 | -0.8141 | -0.5783 | -0.728  | -0.7712 | -0.4483 | -0.567  |
| PKH_143200 | -0.2905 | -0.3441 | -0.4071 | -0.0837 | -0.1648 | -0.2592 | 0.07252 |
| PKH_100890 | -0.7583 | -0.4355 | -0.0856 | -0.1051 | -0.2185 | -0.3043 | -0.5874 |
| PKH_111670 | 0.25377 | 0.21995 | 0.21772 | -0.0392 | -0.3324 | -0.3755 | -0.4666 |
| PKH_125350 | -0.1995 | -0.2309 | -0.218  | -0.3732 | -0.3551 | -0.3778 | -0.3045 |
| PKH_133940 | 0.41072 | 0.62884 | 0.87084 | 0.7402  | 0.94205 | 0.42054 | -0.9889 |
| PKH_141720 | -0.1902 | -0.5245 | -0.0687 | -0.0731 | 0.13774 | 0.4127  | 0.82655 |
| PKH_141290 | -0.4332 | -0.4938 | -0.516  | -0.2987 | -0.4702 | -0.4379 | -0.4633 |
| PKH_091620 | 0.21864 | 0.12277 | 0.07992 | -0.0574 | 0.19564 | 0.29687 | 0.45035 |
| PKH_142650 | 0.28622 | 0.19758 | 0.22341 | 0.32549 | 0.35294 | 0.33561 | 0.17121 |
| PKH_125750 | 0.26419 | 0.55032 | 0.59266 | 0.60765 | 0.1642  | 0.04667 | 0.04976 |
| PKH_094160 | 0.29903 | 0.3923  | 0.23464 | 0.20754 | 0.04307 | -0.1911 | -0.3416 |
| PKH_093290 | -0.5963 | -0.7841 | -1.0053 | -0.914  | -0.8293 | -0.6048 | -0.4493 |
| PKH_113130 | -0.0011 | -0.1597 | -0.1936 | -0.2123 | -0.108  | -0.2196 | -0.2222 |
| PKH_103000 | 1.0514  | 1.1573  | 0.6935  | 0.19292 | 0.18502 | 0.09108 | 0.50468 |

|            |         |         |         |         |         |         |         |
|------------|---------|---------|---------|---------|---------|---------|---------|
| PKH_060590 | -0.5652 | -0.4851 | 0.15923 | 0.36309 | 0.67176 | 0.67894 | -0.0315 |
| PKH_131760 | 0.05574 | -0.1583 | -0.6513 | -0.9307 | -0.5911 | 0.34062 | 0.83334 |
| PKH_031670 | -0.4446 | -0.7903 | -0.9749 | -0.782  | -0.8553 | -0.9235 | -1.3916 |
| PKH_071430 | -0.3259 | -0.018  | 0.35736 | 0.50219 | 0.61063 | 0.48086 | 0.11911 |
| PKH_080160 | 0.95754 | 1.04349 | 1.45859 | 1.55635 | 1.39963 | 0.98824 | 1.1029  |
| PKH_071120 | 1.46511 | 1.31268 | 1.24423 | 0.95448 | 1.16801 | 0.97323 | 0.85474 |
| PKH_111530 | 0.26169 | 0.14169 | -0.026  | -0.1083 | -0.0313 | 0.00514 | 0.1297  |
| PKH_010220 | -1.3713 | -1.5792 | -1.6986 | -1.7688 | -1.7252 | -1.6231 | -3.7481 |
| PKH_090530 | 0.49611 | 0.45595 | 0.46526 | 0.33782 | 0.44511 | 0.42628 | 0.62058 |
| PKH_093880 | -0.6554 | -0.1774 | -0.1585 | -0.0699 | -0.3347 | -0.3552 | -0.4236 |
| PKH_072500 | -0.2055 | -0.3003 | -0.1412 | -0.1262 | -0.1141 | -0.0444 | -1.2795 |
| PKH_113240 | -0.2128 | -0.1315 | -0.1029 | -0.0445 | -0.126  | -0.0033 | -0.5814 |
| PKH_011140 | -0.5076 | -0.5286 | -0.7453 | -0.5551 | -0.4572 | -0.5434 | -0.8225 |
| PKH_071190 | -0.1478 | -0.2859 | -0.4086 | -0.2627 | -0.786  | -0.7922 | -0.2518 |
| PKH_021080 | -0.2641 | -0.2974 | -0.3088 | -0.1668 | 0.16625 | -0.2843 | -0.8399 |
| PKH_102630 | 0.20354 | 0.18556 | 0.20708 | 0.5035  | 0.28884 | 0.09631 | 0.01455 |
| PKH_062270 | 0.22183 | 0.17442 | 0.24044 | 0.05246 | 0.12217 | -0.1215 | -0.2624 |
| PKH_020970 | 0.10165 | 0.29922 | 0.06261 | -0.073  | -0.4343 | -0.6476 | -0.7273 |
| PKH_080060 | -0.2354 | -0.489  | -0.3227 | -0.4081 | -0.6016 | -0.6187 | -0.1945 |
| PKH_134370 | -0.1407 | -0.1872 | -0.3601 | -0.1691 | -0.1172 | -0.153  | -0.2297 |
| PKH_091720 | 0.28444 | 0.11236 | -0.0494 | 0.16146 | 0.28675 | 0.71114 | 1.0029  |
| PKH_060490 | 0.10407 | -0.356  | -0.6378 | -0.572  | -0.8077 | -0.6413 | -0.2614 |
| PKH_123800 | 0.87325 | 1.11033 | 1.23439 | 1.21279 | 0.88695 | 0.80192 | 0.77808 |
| PKH_081850 | -0.1202 | 0.01099 | -0.1117 | -0.0935 | -0.3709 | -0.4998 | -0.7949 |
| PKH_072260 | 0.41877 | 0.73355 | 0.23717 | 0.0973  | -0.3773 | -0.5011 | -0.5254 |
| PKH_092340 | -0.5116 | -0.7616 | -0.8725 | -0.7678 | -0.6219 | -0.166  | -0.1066 |
| PKH_010640 | -0.8411 | -0.3005 | -0.5404 | -0.2679 | -0.5022 | -0.4142 | -1.4415 |
| PKH_132930 | 0.60248 | 0.69352 | 0.83961 | 0.15387 | 0.31957 | 0.08464 | -0.1423 |
| PKH_132250 | 0.64194 | 0.62872 | 0.7734  | 0.74309 | 0.64982 | 0.5207  | 0.92588 |
| PKH_111730 | -0.7922 | -0.8876 | -0.8185 | -0.771  | -0.83   | -0.799  | -0.8836 |
| PKH_020050 | 0.89087 | 0.75099 | 0.51528 | 0.2908  | 0.07409 | 0.11553 | 0.75391 |
| PKH_061130 | -0.0818 | 0.10667 | -0.0671 | 0.01411 | 0.02742 | -0.0166 | -1.4479 |
| PKH_061410 | -0.1461 | -0.0384 | -0.2479 | -0.0274 | -0.2025 | -0.0679 | -0.5268 |
| PKH_145870 | 0.09948 | -0.0493 | -0.1241 | -0.2731 | -0.0632 | -0.0674 | 0.03046 |
| PKH_146120 | 0.13503 | 0.11815 | 0.05623 | -0.0549 | -0.2773 | -0.2627 | -0.414  |
| PKH_052450 | -0.5018 | -0.5449 | -0.6569 | -0.7421 | -0.6206 | -0.5419 | -0.8967 |
| PKH_030630 | -0.4489 | -0.3826 | -0.462  | -0.6264 | -0.4227 | -0.8286 | -0.954  |
| PKH_131900 | 0.69385 | 0.81414 | 0.70375 | 0.58636 | 0.39853 | 0.38174 | 0.81971 |
| PKH_122620 | -0.3344 | -0.2321 | -0.353  | -0.3649 | -0.4094 | -0.2324 | -0.2871 |
| PKH_041360 | -0.4443 | -0.2524 | -0.7755 | -0.2256 | -0.3043 | -0.1523 | -0.0888 |
| PKH_020190 | -0.8093 | -0.7343 | -0.708  | -0.6169 | -0.6217 | -0.7305 | -1.0284 |
| PKH_120030 | 1.22678 | 1.07183 | 0.73503 | 0.21037 | -0.4199 | -0.1882 | 0.89463 |
| PKH_061030 | -1.099  | -0.5096 | -1.2289 | 0.00911 | 0       | -0.113  | -1.5461 |
| PKH_061560 | -1.02   | -0.6587 | -0.6202 | -0.2113 | -0.2778 | -0.0925 | -0.283  |
| PKH_021070 | -0.7278 | -0.8739 | -0.483  | -0.2604 | -0.3    | -0.2235 | -0.4548 |
| PKH_010560 | -1.2049 | -1.286  | -1.479  | -1.686  | -1.1476 | -0.2826 | -0.1146 |
| PKH_144110 | -0.1561 | -0.2385 | -0.7207 | -1.2015 | -0.737  | -0.662  | -0.1924 |
| PKH_133200 | 0.62262 | 0.6199  | 0.56604 | 0.22205 | -0.0385 | 0.04145 | 0.59272 |
| PKH_031570 | -0.2195 | 0.20849 | 0.08784 | 0.29031 | 0.15629 | 0.1089  | -0.0669 |
| PKH_140930 | 0.23889 | -0.0509 | 0.14235 | -0.1212 | 0       | 0.02601 | -0.1109 |
| PKH_132960 | -0.1408 | -0.4237 | -0.748  | -0.9672 | -0.978  | -0.9311 | -0.7396 |
| PKH_103090 | 0.30089 | 0.04923 | 0.03836 | 0.34393 | 0.11148 | 0.11282 | 0.02319 |
| PKH_131020 | 0.51238 | 0.51481 | 0.61425 | 0.43151 | 0.45429 | 0.29765 | 0.42363 |
| PKH_020010 | -0.6088 | -1.1626 | -0.6777 | -0.9152 | -1.1079 | -0.6006 | -0.0009 |
| PKH_010710 | -0.6843 | -1.0365 | -1.1864 | -1.5845 | -1.5612 | -1.3391 | -0.9256 |
| PKH_110440 | 0.04415 | -0.2295 | -0.3288 | -0.4661 | -0.7949 | -0.7543 | -0.6428 |
| PKH_122060 | 0.39683 | 0.45904 | 0.51189 | 0.37592 | 0.34457 | 0.66583 | 0.58465 |
| PKH_110020 | 0.56881 | 0.6958  | 0.4336  | 0.3151  | 0.00169 | 0.17599 | -1.0796 |
| PKH_052290 | -0.2802 | -0.302  | -0.3422 | 0.14915 | 0.32172 | 0.51144 | 0.52624 |
| PKH_072900 | -0.1959 | 0.13723 | -0.0809 | -0.1817 | -0.1935 | -0.26   | -0.5601 |
| PKH_092500 | 0.08805 | 0.44015 | -0.1012 | 0.02488 | -0.1909 | -0.3169 | -0.1787 |
| PKH_125340 | 0.17921 | 0.21766 | 0.27964 | 0.3099  | 0.07219 | 0.15305 | 0.54114 |
| PKH_052410 | 0.08445 | -0.0299 | 0.06174 | -0.1305 | -0.0915 | -0.0118 | 0.11874 |

|            |         |         |         |         |         |         |         |
|------------|---------|---------|---------|---------|---------|---------|---------|
| PKH_144090 | 0.62152 | 0.31025 | -0.1223 | -0.3409 | -0.3722 | 0.12342 | 0.63278 |
| PKH_050820 | -0.4571 | -0.6325 | -0.6997 | -0.5703 | -0.7197 | -0.5908 | -1.9715 |
| PKH_144810 | 0.22664 | -0.0749 | -0.1271 | -0.3113 | 0.51954 | 1.02332 | 1.27358 |
| PKH_091790 | -0.858  | -0.8838 | -0.8117 | -1.0125 | -1.197  | -0.9391 | -0.5333 |
| PKH_124780 | -0.0159 | -0.0848 | -0.0654 | -0.0058 | -0.0408 | -0.0364 | -0.0694 |
| PKH_112570 | 0.5574  | 0.31455 | 0.3459  | 0.00849 | 0.13463 | 0.36484 | 0.82375 |
| PKH_110700 | 0.24174 | 0.34977 | 0.31909 | 0.55991 | 0.21706 | 0.02884 | -0.1049 |
| PKH_082670 | -0.41   | -0.3861 | -0.676  | -0.6063 | -0.581  | -0.6632 | -0.7304 |
| PKH_131260 | 0.2107  | 0.29495 | 0.21101 | 0.20762 | 0.06917 | -0.1616 | -0.4647 |
| PKH_110840 | 0.46245 | 0.50865 | 0.4679  | 0.5354  | 0.19974 | 0.08732 | 0.19362 |
| PKH_083020 | 0.0294  | 0.11836 | 0.19182 | 0.07319 | -0.1177 | -0.1352 | -0.2949 |
| PKH_124580 | 0.38257 | 0.51323 | 0.33847 | 0.18984 | 0.33461 | 0.2216  | 0.1773  |
| PKH_121760 | 0.06398 | 0.14925 | 0.04802 | 0.28222 | 0.07007 | 0.05163 | 0.23809 |
| PKH_050780 | -0.2553 | -0.4869 | -0.5335 | -0.8046 | -0.7664 | -0.4242 | 0.11831 |
| PKH_131740 | 0.69159 | 0.76248 | 0.48052 | 0.59242 | 0.50718 | 0.62756 | 0.62661 |
| PKH_071390 | 0.20425 | 0.54562 | 0.58881 | 0.66665 | 0.30269 | -0.1551 | -0.0417 |
| PKH_145440 | 0.17261 | 0.01317 | 0.10949 | -0.0243 | 0.11509 | 0.13638 | -0.02   |
| PKH_110060 | 0.93707 | 0.60341 | 0.17445 | -0.0982 | -0.03   | 0.04023 | 0.27865 |
| PKH_123460 | 0.78751 | 0.62368 | 0.48708 | 0.37411 | 0.32692 | 0.18383 | 0.28972 |
| PKH_141630 | -0.4285 | -0.4615 | -0.2758 | -0.0178 | 0.00494 | -0.0193 | -0.1002 |
| PKH_040410 | 0.24275 | 0.46014 | 0.46742 | 0.59678 | 0.86404 | 0.606   | 0.35606 |
| PKH_102170 | 0.01304 | 0.18638 | 0.19394 | 0.15115 | 0.40103 | 0.28405 | 0.25416 |
| PKH_091970 | 0.31312 | 0.29236 | 0.35138 | 0.61088 | 0.63316 | 0.6107  | 0.67709 |
| PKH_061750 | 0.4571  | 0.13296 | 0.05137 | -0.1722 | -0.2554 | -0.1155 | 0.11138 |
| PKH_126050 | 0.42859 | 0.28154 | 0.32582 | 0.21589 | 0.52509 | 0.38592 | 0.08182 |
| PKH_080720 | 0.12018 | 0.25718 | 0.27707 | 0.49536 | -0.8977 | 0.46446 | 0.46239 |
| PKH_020090 | 2.27423 | 1.88625 | 1.21484 | 0.75451 | 0.64757 | 1.66279 | 2.87503 |
| PKH_140470 | 0.21489 | 0.54035 | 1.18098 | 1.52557 | 0.79583 | 0.44304 | 0.7209  |
| PKH_113880 | 0.2847  | 0.46337 | 0.25041 | 0.07783 | -0.1297 | -0.396  | -0.3318 |
| PKH_123190 | -1.3844 | -1.9356 | -2.2693 | -2.3123 | -1.0178 | 0.0995  | 0.21465 |
| PKH_011310 | -0.5279 | -0.5144 | -0.5083 | -0.4092 | -0.1851 | -0.2452 | -0.5377 |
| PKH_143530 | 0.88987 | 0.82912 | 0.77922 | 0.63578 | 0.47144 | 0.34365 | 0.10319 |
| PKH_050450 | -0.5784 | -0.1863 | -0.0843 | -0.3113 | 0.23079 | -0.0021 | -0.9308 |
| PKH_072710 | -0.9059 | -1.0354 | -0.991  | -0.8801 | -0.7448 | -0.8111 | -0.4643 |
| PKH_125760 | 0.435   | 0.61721 | 0.62627 | 0.63376 | 0.38337 | 0.26352 | 0.41143 |
| PKH_081930 | -0.6622 | -0.4538 | -0.4633 | -0.456  | -0.604  | -0.444  | -0.8621 |
| PKH_141570 | 1.01863 | 0.93856 | 0.88653 | 1.08628 | 0.94029 | 0.62429 | 0.80841 |
| PKH_090480 | 0.15204 | 0.37913 | 0.42794 | 0.47889 | 0.29915 | 0.14582 | -1.2407 |
| PKH_100650 | -0.4353 | -0.4113 | -0.1719 | -0.5073 | -0.3176 | -0.6992 | -2.4759 |
| PKH_050350 | -0.2619 | -0.2664 | -0.3231 | -0.2108 | -0.286  | -0.3086 | -1.5318 |
| PKH_111520 | -0.3714 | -0.3253 | -0.4521 | -0.2431 | -0.3842 | -0.4947 | -0.5082 |
| PKH_060200 | 0.30389 | 0.47744 | 0.47291 | 0.64445 | 0.37292 | 0.30178 | 0.3551  |
| PKH_111860 | 0.19506 | 0.31452 | 0.34738 | 0.60045 | 0.54681 | 0.3407  | 0.24626 |
| PKH_041440 | 0.63247 | 0.60357 | 0.74282 | 0.77987 | 0.34595 | 0.0739  | 0.33086 |
| PKH_102330 | -0.3206 | -0.2661 | -0.4932 | -0.4049 | -0.5552 | -0.3825 | -1.7082 |
| PKH_121150 | 0.54426 | 0.78826 | 1.01927 | 0.90428 | 1.09896 | 0.9459  | 0.83404 |
| PKH_133830 | 0.76088 | 0.65467 | 0.58767 | 0.37943 | 0.68402 | 0.59743 | 0.76681 |
| PKH_100560 | 1.02675 | 0.91516 | 1.1396  | 0.99562 | 0.93418 | 0.74922 | 0.65779 |
| PKH_126660 | 0.42633 | 0.81913 | 0.78085 | 1.1068  | 0.86846 | 0.60823 | 0.51562 |
| PKH_071610 | -0.1843 | -0.3103 | -0.2267 | -0.3686 | -0.515  | -0.3668 | 0.09817 |
| PKH_146930 | 0.8935  | 0.7367  | 0.74364 | 1.11799 | 0.30448 | 0.274   | 0.43736 |
| PKH_061880 | -0.6225 | -0.3388 | -0.1199 | 0.38332 | 0.47551 | 0.5622  | 0.51435 |
| PKH_113380 | -0.3527 | -0.2859 | 0.20634 | 0.37901 | 0.64057 | 0.44927 | 0.36621 |
| PKH_073330 | 0.24882 | 0.657   | 0.71203 | 0.89282 | 0.66313 | 0.56252 | 0.31494 |
| PKH_145090 | -0.227  | -0.1798 | -0.0616 | -0.0184 | -0.0755 | -0.2714 | 0.02451 |
| PKH_132470 | 0.22342 | 0.16174 | 0.12669 | 0.3132  | 0.49803 | 0.22112 | -1.1884 |
| PKH_123400 | 0.31569 | 0.7203  | 0.68919 | 0.69662 | 0.4842  | 0.18414 | 0.02591 |
| PKH_112480 | 0.19207 | 0.18414 | 0.14429 | 0.33688 | 0.48292 | 0.58958 | 0.39753 |
| PKH_031920 | -0.3995 | -0.2943 | -0.2332 | -0.4147 | -0.7662 | -0.1288 | -0.3106 |
| PKH_030730 | -0.7594 | -0.3692 | -0.2907 | -0.3645 | -0.3882 | -0.3406 | -0.4966 |
| PKH_083380 | -0.375  | -0.538  | -0.8125 | -0.8057 | -0.6513 | -0.5678 | -0.3287 |
| PKH_142770 | -0.2227 | -0.3342 | -0.5745 | -0.3152 | 0.08458 | 0.22115 | -0.5099 |
| PKH_091370 | -0.3691 | -0.0704 | -0.2619 | -0.2201 | -0.3628 | -0.6796 | -1.1383 |

|            |         |         |         |         |         |         |         |
|------------|---------|---------|---------|---------|---------|---------|---------|
| PKH_030040 | -0.0537 | -0.1137 | -0.2659 | -0.3655 | -0.535  | -0.6996 | -0.9817 |
| PKH_071720 | 0.08641 | 0.23756 | 0.20398 | -0.0507 | -0.0684 | -0.078  | -0.4408 |
| PKH_125080 | 0.27888 | 0.07874 | 0.04916 | -0.0025 | 0.06047 | 0.17804 | 0.27652 |
| PKH_080700 | -0.4165 | -0.3875 | -0.3796 | -0.294  | -0.1434 | -0.2895 | -0.6874 |
| PKH_124530 | 0.09767 | -0.018  | 0.01632 | 0.10824 | -0.0985 | -0.2066 | -0.0999 |
| PKH_143420 | 0.57688 | 0.65801 | 0.93729 | 0.56094 | 0.82827 | 0.54948 | 0.72588 |
| PKH_040510 | -0.3553 | -0.415  | -0.5268 | -0.6397 | -0.4797 | 0.08788 | -0.1829 |
| PKH_092490 | -0.1948 | -0.049  | 0.07741 | -0.1275 | 0.00074 | -0.2554 | -0.4622 |
| PKH_041350 | 0.16873 | 0.26563 | 0.1525  | 0.12794 | 0.14364 | 0.02429 | 0.0801  |
| PKH_031110 | -0.177  | 0.15658 | 0.1487  | 0.41247 | 0.57026 | -0.0291 | 0.18692 |
| PKH_093930 | -0.0163 | -0.0983 | -0.008  | -0.0757 | -0.1981 | -0.0726 | -1.4551 |
| PKH_090820 | 0.30433 | 0.2285  | 0.15361 | 0.10208 | 0.28621 | 0.4624  | 0.44298 |
| PKH_120760 | 0.53412 | 0.74581 | 0.78431 | 0.62704 | 0.46846 | 0.35937 | 0.10182 |
| PKH_093310 | -1.5303 | -1.6106 | -1.5212 | -1.5911 | -1.2492 | -0.9839 | -0.9191 |
| PKH_050480 | -0.791  | -0.9106 | -1.0456 | -1.2729 | -1.0479 | -1.1472 | -1.5564 |
| PKH_146380 | -0.1146 | -0.8838 | -1.5844 | -1.512  | 0.30404 | 1.24983 | 2.22633 |
| PKH_121800 | -0.0165 | -0.1206 | -0.2402 | -0.1928 | -0.2169 | 0.02152 | -0.0091 |
| PKH_040020 | 0.48319 | 0.11701 | -0.2325 | -0.6054 | -0.2782 | 0.30517 | 0.59377 |
| PKH_051470 | 0.37274 | 0.45511 | 0.49412 | 0.24605 | 0.47032 | 0.49777 | 0.53132 |
| PKH_130790 | -1.2809 | -1.6483 | -1.3073 | -1.6603 | -1.0417 | -1.2851 | -0.9382 |
| PKH_120510 | 1.15449 | 1.3614  | 0.9467  | 1.18881 | 0.66804 | 0.45999 | 0.50973 |
| PKH_040980 | -0.2724 | -0.2601 | -0.0109 | -0.0368 | -0.3994 | -0.2872 | -0.0312 |
| PKH_130870 | 0.50838 | 0.72312 | 0.94551 | 0.63685 | 0.72619 | 0.4845  | -0.065  |
| PKH_140860 | 0.62819 | 0.48947 | 0.54652 | 0.56349 | 0.53472 | 0.26835 | 0.42762 |
| PKH_130160 | 0.49415 | 0.58798 | 0.71559 | 0.75435 | 0.29949 | 0.13335 | 0.55352 |
| PKH_093080 | 0.96349 | 0.78024 | 0.67603 | 0.46761 | 0.28718 | 0.60549 | 0.98915 |
| PKH_072820 | -0.458  | -0.3679 | -0.5953 | -0.4762 | -0.543  | -0.4097 | -0.7291 |
| PKH_030750 | -0.7553 | -0.5914 | -0.6245 | -0.8749 | -0.793  | -1.0063 | -1.6453 |
| PKH_091350 | -1.2157 | -1.2024 | -0.9969 | -0.6448 | -0.5068 | -0.1546 | -0.335  |
| PKH_145560 | -0.3528 | -0.0615 | -0.0624 | 0.04551 | 0.07591 | 0.07137 | 0.26353 |
| PKH_071270 | 0.06059 | -0.2509 | -0.2383 | -0.4214 | -0.778  | -0.9364 | -0.8792 |
| PKH_093460 | -0.3977 | -0.664  | -0.5534 | 0.11178 | 0.50576 | 0.63046 | 0.58012 |
| PKH_050730 | 0.6536  | 0.28024 | 0.14205 | 0.14389 | 0.4608  | 0.36857 | 0.10021 |
| PKH_114340 | -0.0932 | -0.0472 | 0.05455 | 0.18986 | 0.21925 | 0.29429 | 0.00621 |
| PKH_080430 | 0.42406 | 0.22565 | 0.10071 | 0.19216 | -0.0258 | 0.23945 | 0.09965 |
| PKH_073090 | 0.29414 | 0.19393 | -0.071  | -0.2434 | -0.5182 | -0.3119 | -0.0984 |
| PKH_094090 | -0.7138 | -0.6676 | -0.8831 | -1.2188 | -1.0342 | -0.9918 | -0.6923 |
| PKH_050930 | 0.31478 | 0.33759 | 0.08957 | -0.0522 | -0.285  | -0.2698 | -0.2404 |
| PKH_062300 | -0.375  | -0.9654 | -0.9635 | -1.1778 | -0.0626 | 0.46115 | 0.62887 |
| PKH_071630 | 0.06864 | 0.31098 | 0.20364 | 0.39144 | 0.38572 | 0.36191 | 0.14099 |
| PKH_091750 | 0.39686 | 0.44994 | 0.04876 | -0.4334 | -0.4778 | -0.5803 | -0.52   |
| PKH_094470 | 0.0012  | 0.0036  | -0.1189 | -0.0569 | -0.355  | -0.3904 | -0.2882 |
| PKH_072270 | -0.664  | -0.6454 | -0.4637 | -0.5366 | -0.0662 | 0.04295 | 0.22263 |
| PKH_090940 | -0.362  | -0.1329 | 0.1747  | 0.45838 | 1.02756 | 0.90045 | 0.02803 |
| PKH_120660 | -0.0679 | 0.35623 | 0.74008 | 1.25243 | 1.00004 | 0.91491 | 0.51792 |
| PKH_112320 | 0.08134 | 0.53743 | 0.58118 | 0.61726 | 0.34642 | -0.0432 | -0.0948 |
| PKH_112910 | 0.22186 | -0.0171 | 0.12139 | 0.32036 | 0.68882 | 0.62425 | 0.67926 |
| PKH_031390 | 0.86541 | 0.73338 | 0.58523 | 0.68581 | 0.43864 | 0.51626 | 0.9258  |
| PKH_140020 | -0.0411 | -0.1853 | -0.5154 | -1.0069 | -0.7687 | -0.6287 | -0.2885 |
| PKH_100710 | 0.15601 | -0.4228 | -0.6109 | -0.5352 | -0.6381 | -0.4685 | -0.2464 |
| PKH_090410 | 0.29069 | 0.24428 | 0.11804 | -0.054  | 0.36457 | -0.0235 | 0.35754 |
| PKH_090130 | 0.65715 | 0.74086 | 0.68636 | 0.89984 | 0.66336 | 0.43801 | 0.6803  |
| PKH_112010 | -0.4032 | -0.4604 | -0.2941 | -0.3549 | -0.3679 | -0.3802 | 0.05197 |
| PKH_127010 | 0.14322 | 0.14105 | 0.18721 | 0.19861 | 0.09365 | -0.0808 | -1.3746 |
| PKH_071680 | 0.22459 | 0.29401 | 0.4743  | 0.35155 | 0.42724 | 0.11588 | -0.2985 |
| PKH_071510 | -0.9426 | -0.701  | -0.6864 | -0.5373 | -0.6986 | -0.7518 | -0.7899 |
| PKH_100510 | -0.794  | -0.1463 | 0.1876  | 0.43049 | 0.4846  | 0.43308 | 0.05861 |
| PKH_133630 | 0.0124  | 0.04063 | -0.0379 | 0.04229 | -0.0432 | 0.07942 | 0.28711 |
| PKH_030060 | -0.1319 | -0.211  | -0.439  | -0.6914 | -0.1579 | -0.3518 | -0.1489 |
| PKH_090100 | -0.2605 | -0.3832 | -0.531  | -0.516  | -0.513  | -0.4996 | -0.3562 |
| PKH_080300 | 0.26869 | 0.17445 | 0.08596 | -0.2451 | -0.219  | -0.4952 | -0.4034 |
| PKH_073160 | -0.0476 | -0.0251 | 0.23287 | 0.06373 | 0.09979 | 0.23296 | -0.052  |
| PKH_030810 | -0.9587 | -0.6865 | -0.8728 | -0.8154 | -0.7451 | -1.0356 | -1.8513 |

|            |         |         |         |         |         |         |         |
|------------|---------|---------|---------|---------|---------|---------|---------|
| PKH_070360 | 0.64877 | 0.72252 | 0.47556 | 0.65909 | 0.29724 | 0.12088 | 0.04356 |
| PKH_031420 | -0.2759 | -0.3158 | -0.3585 | -0.6886 | -0.5515 | -0.6238 | -0.4437 |
| PKH_100260 | -0.4117 | -0.1695 | -0.0515 | 0.36631 | 0.28244 | 0.4714  | 0.1073  |
| PKH_143270 | -0.2002 | -0.1088 | -0.1584 | -0.2096 | -0.2283 | -0.3307 | -0.4402 |
| PKH_132160 | 0.04522 | 0.20664 | 0.30652 | 0.12576 | 0.07603 | 0.11467 | 0.24683 |
| PKH_071960 | 0.25424 | 0.26051 | 0.40437 | 0.21021 | 0.05576 | 0.17753 | 0.26462 |
| PKH_100660 | -0.0638 | -0.3701 | -0.2756 | -0.4839 | -0.1315 | -0.167  | -0.188  |
| PKH_080680 | -0.3317 | -0.3195 | -0.3428 | -0.1192 | 0.37261 | 0.4948  | 0.41951 |
| PKH_134340 | 0.47752 | 0.75111 | 0.64922 | 0.57997 | 0.76484 | 0.47925 | 0.66856 |
| PKH_130330 | 0.62269 | 0.78878 | 0.79992 | 1.03466 | 0.79583 | 0.77215 | 0.63759 |
| PKH_145770 | 0.6337  | 0.51688 | 0.49691 | 0.50566 | 0.54392 | 0.33437 | 0.27296 |
| PKH_030180 | 0.97756 | 0.94524 | 0.43784 | 0.24555 | 0.29228 | 0.48707 | 0.98043 |
| PKH_114390 | -0.2994 | -0.4088 | -0.385  | -0.2936 | -0.0083 | 0       | -1.2944 |
| PKH_093280 | -1.0806 | -0.7922 | -1.0531 | -0.7571 | -0.5065 | -0.8975 | -1.1516 |
| PKH_130180 | 0.24351 | 0.44143 | 0.62509 | 0.54779 | 0.5645  | 0.25067 | 0.4482  |
| PKH_124590 | -0.1085 | -0.0925 | -0.3063 | -0.3583 | -0.2397 | -0.3181 | -1.5857 |
| PKH_142630 | 0.58293 | 0.15123 | 0.02312 | 0.00287 | 0.47188 | 0.29018 | 0.71327 |
| PKH_010840 | -0.3552 | -0.4097 | -0.1855 | -0.4954 | -0.0707 | -0.1578 | -0.0081 |
| PKH_062130 | 0.08033 | 0.24426 | 0.59164 | 0.21883 | 0.10096 | -0.0722 | -0.5714 |
| PKH_061290 | 0.04443 | -0.1192 | -0.0754 | -0.1095 | -0.5159 | -0.2343 | -1.46   |
| PKH_070370 | -0.0905 | -0.0253 | -0.0957 | -0.1519 | -0.0308 | 0.00668 | -0.0909 |
| PKH_051550 | -0.7234 | -0.4229 | -0.3349 | -0.3214 | -0.4592 | -0.4026 | -2.388  |
| PKH_031620 | 0.25851 | 0.02679 | -0.167  | -0.1009 | -0.0506 | 0.09663 | 0.46277 |
| PKH_030230 | -0.8916 | -0.8298 | -1.1833 | -1.4542 | -1.3918 | -1.14   | -1.2632 |
| PKH_092380 | 0.27878 | 0.23609 | 0.1363  | -0.0594 | -0.3493 | -0.1441 | 0.02255 |
| PKH_124020 | 0.80764 | 0.62302 | 0.71522 | 0.83865 | 0.54252 | 0.94355 | 1.30216 |
| PKH_071230 | 0.07756 | 0.31347 | 0.45291 | 0.76509 | 0.23393 | -0.049  | -0.7123 |
| PKH_081480 | -0.1468 | -0.1726 | -0.0831 | -0.1223 | 0.0175  | 0.35405 | 0.2652  |
| PKH_146060 | -1.6136 | -1.3671 | -1.3049 | -0.5648 | -0.1539 | -0.1894 | -0.3546 |
| PKH_132700 | -0.278  | -0.0783 | -0.2626 | -0.2412 | -0.2134 | -0.0505 | 0.10886 |
| PKH_061970 | -0.2151 | -0.024  | 0.02554 | 0.00954 | -0.3485 | -0.3706 | -0.4681 |
| PKH_071330 | -0.9067 | -0.8166 | -0.7862 | -0.7601 | -0.3107 | 0.12649 | -0.281  |
| PKH_103170 | 0.3743  | 0.56558 | 0.85097 | 1.15649 | 1.01784 | 0.87514 | 0.72807 |
| PKH_080460 | 0.164   | 0.38467 | 0.47391 | 0.42795 | 0.58505 | 0.37118 | 0.459   |
| PKH_020040 | 1.82847 | 1.49803 | 1.19275 | 0.83798 | 0.77019 | 1.2132  | 2.31037 |
| PKH_092940 | 0.06504 | -0.0956 | -0.1843 | -0.2954 | 0.01365 | 0.02473 | 0.23983 |
| PKH_052230 | -0.4377 | -0.463  | -0.6961 | -0.9706 | -1.0839 | -1.1169 | -0.8214 |
| PKH_143050 | -0.1976 | -0.6409 | -0.9226 | -0.6289 | -1.0933 | -0.9013 | -0.2072 |
| PKH_030070 | -1.201  | -0.9363 | -1.0821 | -0.5625 | -0.4875 | -0.5233 | -0.9585 |
| PKH_020020 | -0.1406 | -0.9376 | -1.3082 | -1.729  | -0.8439 | -0.3095 | 0.45021 |
| PKH_122530 | 0.91055 | 0.82903 | 0.96975 | 0.98713 | 0.65661 | 0.92093 | 0.72338 |
| PKH_061350 | -0.4028 | -0.5559 | -0.5408 | -0.473  | -0.6915 | -0.2705 | -0.0196 |
| PKH_101250 | 0.12666 | 0.20886 | 0.17424 | 0.04284 | 0.2213  | -0.0263 | 0.04573 |
| PKH_011590 | 0.04376 | -0.0078 | -0.2471 | -0.3201 | -0.3212 | -0.3432 | -0.2731 |
| PKH_124510 | 0.45305 | 0.56081 | 0.4582  | 0.78358 | 0.43612 | 0.28863 | 0.43228 |
| PKH_146310 | -0.4524 | -0.9255 | -0.6821 | -0.9172 | -0.4508 | -0.3747 | -0.287  |
| PKH_133130 | 0.87016 | 1.04324 | 1.27563 | 1.24258 | 0.70832 | 0.64424 | 0.88861 |
| PKH_031120 | -1.1682 | -0.8252 | -0.0484 | 0.80912 | 0.28928 | 0.14046 | -0.8082 |
| PKH_083180 | 0.5573  | 0.72474 | 0.72567 | 0.74762 | 0.27089 | -0.3279 | -0.8099 |
| PKH_121310 | 0.93344 | 0.74427 | 0.54395 | 0.46751 | 0.18172 | 0.11077 | 0.45919 |
| PKH_100140 | 0.41931 | 0.42691 | 0.45409 | 0.57306 | 0.45871 | 0.52974 | 0.53758 |
| PKH_142510 | -0.3452 | -0.5685 | -0.6941 | -0.6717 | -0.6154 | -0.3736 | 0.46255 |
| PKH_146350 | -0.8973 | -0.9857 | -0.4706 | -0.0732 | 0.26068 | 0.71776 | 0.58059 |
| PKH_120870 | 0.05836 | 0.5618  | 0.66505 | 0.54052 | 0.21243 | -0.0385 | -0.4233 |
| PKH_072350 | -0.1581 | -0.317  | -0.4023 | -0.4518 | -0.2499 | -0.3008 | -0.0281 |
| PKH_020080 | 0.76168 | 0.45417 | 0.03842 | -0.4015 | -0.508  | -0.0827 | 0.89813 |
| PKH_061760 | 0.73647 | 0.58971 | 0.19181 | 0.17972 | 0.03451 | 0.14144 | 0.35236 |
| PKH_100220 | -0.1089 | -0.1863 | -0.3252 | -0.6198 | -0.3784 | -0.2002 | -0.0278 |
| PKH_031350 | 1.23776 | 0.93766 | 0.27477 | 0.66289 | 0       | 0.18376 | 0.24021 |
| PKH_051360 | -0.3828 | -0.4929 | -0.4817 | -0.4427 | -0.4953 | -0.6832 | -0.8244 |
| PKH_072860 | -0.5475 | -0.5463 | -0.7822 | -0.6334 | -0.5316 | -0.861  | -1.1225 |
| PKH_142710 | 0.67311 | 0.50875 | 0.2764  | 0.04674 | 0.01625 | 0.0426  | 0.49744 |
| PKH_101810 | 0.84893 | 0.78947 | 0.52491 | 0.60855 | 0.73216 | 0.80086 | 0.85115 |



|            |         |         |         |         |         |         |         |
|------------|---------|---------|---------|---------|---------|---------|---------|
| PKH_061250 | 0.37757 | 0.5113  | 0.39512 | 0.41164 | 0.5857  | 0.48895 | 0.31915 |
| PKH_071260 | -0.7082 | -0.3874 | -0.2346 | -0.2918 | -0.4235 | -0.626  | -1.356  |
| PKH_113300 | 0.0451  | -0.1818 | -0.2141 | -0.4014 | -0.6764 | -0.6766 | -1.5317 |
| PKH_051940 | -0.4114 | -0.4008 | -0.4959 | -0.3198 | -0.3978 | -0.427  | -0.4021 |
| PKH_010760 | -1.691  | -1.4061 | -1.7489 | -1.7369 | -1.6338 | -1.7463 | -1.6295 |
| PKH_051570 | -1.0083 | -1.009  | -0.9043 | -0.8512 | -1.1067 | -1.3331 | -3.093  |
| PKH_083540 | 0.08799 | 0.13362 | 0.38415 | 0.12891 | 0.17097 | 0.22391 | -0.0442 |
| PKH_102900 | 0.18142 | -0.03   | 0.10586 | 0.12834 | 0.22874 | -0.0441 | 0.06747 |
| PKH_125270 | -0.2925 | 0.26838 | 0.03925 | -0.0008 | 0.00831 | -0.0822 | -0.1332 |
| PKH_051170 | -0.2576 | -0.3239 | -0.3184 | -0.2936 | -0.0865 | -0.4597 | -0.6449 |
| PKH_140260 | 0.19653 | 0.76742 | 0.93018 | 1.0019  | 0.89936 | 0.49055 | -0.1699 |
| PKH_062240 | 0.61336 | 0.52006 | 0.07302 | -0.1728 | -0.4442 | -0.7386 | -0.5785 |
| PKH_125260 | 0.258   | 0.14894 | 0.05888 | -0.3174 | -0.3726 | -0.0548 | 0.19175 |
| PKH_052090 | -0.5214 | -0.2134 | -0.3887 | -0.0512 | -0.054  | 0.02342 | -0.6251 |
| PKH_131650 | 0.10597 | -0.0361 | 0.07333 | -0.1809 | 0.22596 | 0.09628 | 0.46416 |
| PKH_083190 | -0.4825 | -0.6839 | -0.4227 | -0.2759 | 0.01432 | 0.158   | -0.1979 |
| PKH_125830 | 0.83772 | 0.64144 | 0.70911 | 0.57512 | 0.40691 | 0.5146  | 0.93944 |
| PKH_071060 | 0.29565 | 0.10784 | 0.09833 | 0.18377 | 0.41136 | 0.14555 | 0.15146 |
| PKH_093890 | 0.17916 | 0.20043 | 0.1454  | 0.43327 | 0.32588 | 0.15278 | 0.3281  |
| PKH_071760 | 0.0751  | -0.0435 | 0.09705 | 0.18209 | -0.2222 | -0.2742 | -0.5832 |
| PKH_145840 | 0.41133 | 0.49134 | 0.10242 | 0.54118 | 0.53687 | 0.57355 | -0.2159 |
| PKH_120770 | -0.3728 | -0.263  | -0.3766 | -0.4107 | -0.5075 | -0.5254 | -0.9636 |
| PKH_126590 | -0.5092 | -0.3108 | 0.09333 | 0.39449 | 0.37982 | 0.46585 | 0.35247 |
| PKH_146220 | 0.15112 | 0.34089 | 0.55269 | 0.63032 | 0.59807 | 0.40687 | 0.33423 |
| PKH_073290 | -0.5342 | -0.762  | -0.687  | -0.303  | 0.02614 | 0.23026 | 0.46273 |
| PKH_114760 | -0.4748 | -0.432  | -0.3018 | 0.14699 | -0.1042 | -0.2336 | -0.5592 |
| PKH_146860 | 0.14618 | 0.13302 | 0.31391 | 0.14131 | 0.21213 | 0.05396 | 0.63758 |
| PKH_110170 | 0.10028 | 0.25039 | 0.22304 | 0.00063 | 0.04822 | -0.2388 | -0.0422 |
| PKH_101360 | -0.1724 | -0.3307 | -0.5026 | -0.4582 | -0.555  | -0.4174 | -0.279  |
| PKH_124470 | 0.79578 | 0.37709 | 0.44636 | 0.05583 | 0.37603 | 0.36036 | 0.86006 |
| PKH_142980 | 0.22477 | 0.16179 | 0.34479 | 0.34049 | 0.2098  | 0.26449 | 0.43538 |
| PKH_082610 | 0.18445 | 0.35545 | 0.42071 | 0.79628 | 0.68434 | 0.35359 | -0.0979 |
| PKH_010020 | -0.3029 | -0.387  | -1.0534 | -0.1014 | -0.0166 | -0.2538 | -1.1442 |
| PKH_073170 | -0.4356 | -0.1567 | 0.0233  | -0.1779 | 0.10742 | -0.3022 | -0.9605 |
| PKH_082110 | -0.4825 | 0.10557 | 0.47493 | 0.60445 | 0.6881  | 0.44504 | 0.07223 |
| PKH_112760 | 0.37712 | 0.16299 | 0.04621 | 0.10439 | -0.1313 | -0.2506 | -0.0834 |
| PKH_083010 | 0.09781 | -0.0259 | 0.01615 | 0.03962 | 0.08949 | 0.27126 | 0.25782 |
| PKH_126310 | 0.32752 | 0.37112 | 0.18319 | 0.01604 | -0.1637 | -0.1951 | -1.6625 |
| PKH_126670 | 0.23709 | 0.44277 | 0.46346 | 0.69268 | 0.8616  | 0.73734 | 0.77476 |
| PKH_126200 | 0.3929  | 0.5539  | 0.70636 | 0.89795 | 0.54771 | 0.53836 | 0.60616 |
| PKH_061940 | -0.4825 | -0.3981 | -0.251  | -0.4442 | -0.4659 | -0.1434 | -0.175  |
| PKH_092770 | 0.21452 | 0.33887 | 0.37602 | 0.3327  | 0.42028 | 0.04734 | 0.02765 |
| PKH_114670 | -0.1851 | -0.2757 | -0.6614 | -0.2794 | -0.4275 | -0.5679 | -0.7005 |
| PKH_020280 | 0.3719  | 0.56872 | 0.26353 | 0.22329 | 0.15587 | 0.33553 | 0.33946 |
| PKH_126530 | 0.85204 | 0.8457  | 0.76517 | 0.61891 | 0.59737 | 0.5403  | 0.43163 |
| PKH_062070 | -0.2798 | -0.5896 | -0.7667 | -0.8024 | -0.0629 | 0.46252 | 0.57357 |
| PKH_143990 | 0.46885 | 0.4433  | 0.56226 | 0.55428 | 0.47408 | 0.66555 | 0.56779 |
| PKH_114770 | 0.58525 | 0.5921  | 0.50369 | 0.2273  | -0.1574 | -0.1835 | -0.0719 |
| PKH_102980 | -0.2308 | -0.0448 | 0.53089 | 0.4905  | 0.94246 | 0.9349  | 1.43258 |
| PKH_031300 | -0.4689 | -0.3818 | -0.2434 | -0.4845 | -0.6406 | -0.8629 | -1.0913 |
| PKH_092390 | 0.0538  | 0.0578  | 0.01237 | -0.0663 | -0.1457 | -0.2358 | -0.3396 |
| PKH_144140 | 0.39753 | 0.60247 | 0.33378 | 0.19036 | -1.1658 | 0.26949 | 0.89576 |
| PKH_072810 | 0.07319 | -0.0046 | 0.1411  | 0.13851 | 0.07575 | 0.1268  | 0.17563 |
| PKH_020710 | -0.7121 | -0.6499 | -0.9567 | -0.8259 | -0.8303 | -0.7618 | -1.6539 |
| PKH_140690 | 0.00395 | -0.1544 | -0.0814 | -0.0355 | 0.45363 | 0.66821 | 0.89835 |
| PKH_140760 | -0.1831 | -0.0617 | 0.19329 | 0.43263 | 0.42677 | 0.29902 | -0.0247 |
| PKH_114110 | 0.19958 | 0.24698 | 0.37373 | 0.40768 | 0.20732 | 0.08985 | 0.17449 |
| PKH_131150 | 0.37199 | 0.43957 | 0.37383 | 0.68339 | 0.44531 | 0.22608 | 0.05749 |
| PKH_101300 | 0.7135  | 0.87086 | 0.82526 | 0.76315 | 0.22    | -0.0232 | -0.1262 |
| PKH_072890 | -0.867  | -0.9962 | -1.2382 | -1.2317 | -1.2955 | -1.3817 | -2.1901 |
| PKH_131970 | -0.2992 | -0.0303 | -0.2149 | -0.2753 | -0.2527 | -0.3609 | -0.0962 |
| PKH_102590 | 0.3579  | 0.33114 | 0.28183 | 0.37812 | -0.0509 | -0.16   | -0.1486 |
| PKH_113730 | 0.10424 | -0.4271 | -0.509  | -0.5642 | -0.3374 | -0.2573 | 0.33219 |

|            |         |         |         |         |         |         |         |
|------------|---------|---------|---------|---------|---------|---------|---------|
| PKH_141390 | 0.43478 | 0.09642 | -0.3003 | -0.2409 | -0.1389 | -0.116  | -1.017  |
| PKH_081130 | 0.33611 | 0.19333 | 0.11797 | -0.0269 | 0.1558  | 0.22516 | 0.38417 |
| PKH_111130 | 0.34499 | 0.09701 | 0.1363  | 0.18177 | -0.1104 | 0.00871 | -1.4677 |
| PKH_031650 | 0.03588 | 0.26687 | 0.09034 | 0.00954 | 0.02323 | 0.12492 | 0.10088 |
| PKH_093660 | -0.5236 | -0.648  | -0.7368 | -0.7483 | -0.5952 | -0.4608 | -0.4712 |
| PKH_110830 | 0.26663 | -0.0154 | 0.1811  | -0.2572 | 0.02616 | 0.05411 | 0.12835 |
| PKH_132800 | 0.91518 | 1.05197 | 1.21746 | 1.44281 | 1.0026  | 0.65665 | 0.73105 |
| PKH_090950 | 0.6755  | 0.61947 | 0.50992 | 0.4971  | 0.33826 | 0.17781 | 0.40502 |
| PKH_031960 | 0.16776 | -0.0123 | -0.6557 | -0.4614 | -1.163  | -1.2526 | -0.3159 |
| PKH_126430 | -0.3432 | 0.00215 | -0.0103 | -0.2382 | -0.0769 | -0.3055 | -0.5114 |
| PKH_010180 | -1.431  | -1.4397 | -0.9653 | -0.7293 | -0.2276 | -0.1103 | -0.7716 |
| PKH_130750 | 0.17758 | 0.37152 | 0.0437  | 0.25472 | 0.14029 | -0.4558 | -1.7062 |
| PKH_102770 | 0.02733 | -0.1671 | -0.0467 | 0.22649 | 0.34078 | 0.57348 | 0.77337 |
| PKH_061540 | -0.1867 | -0.0129 | 0.02618 | 0.06591 | -0.3173 | -0.3746 | -1.2298 |
| PKH_031600 | 0.12502 | 0.09987 | -0.0836 | 0.0082  | -0.2877 | -0.3317 | -0.1679 |
| PKH_070660 | 0.1153  | 0.07981 | 0.34011 | 0.5925  | 0.73416 | 0.84239 | 0.9037  |
| PKH_140110 | 0.16471 | 0.04612 | -0.093  | -0.2914 | 0.04962 | 0.07206 | 0.62457 |
| PKH_093450 | 0.41149 | 0.34807 | 0.21395 | 0.1054  | 0.16366 | 0.17058 | 0.2698  |
| PKH_100990 | -0.3261 | -0.5205 | -0.3906 | -0.8048 | -0.4372 | -0.1743 | 0.17817 |
| PKH_070120 | 0.73057 | 0.9618  | 1.43964 | 1.57891 | 0.96221 | 0.72806 | 0.59697 |
| PKH_146690 | 0.17203 | 0.16749 | 0.262   | 0.05715 | 0.05335 | 0.02391 | -0.2769 |
| PKH_124670 | 0.31198 | 0.2509  | 0.27074 | 0.2397  | 0.04156 | 0.07859 | -0.0575 |
| PKH_092160 | -0.3107 | -0.4326 | -0.5608 | -0.4718 | -0.4875 | -0.5587 | -0.7481 |
| PKH_061650 | -1.5005 | -1.7857 | -1.9995 | -2.1639 | -1.6177 | -1.3271 | -2.0118 |
| PKH_121320 | 0.69943 | 0.67576 | 0.48504 | 0.24841 | -0.0816 | -0.395  | -0.0483 |
| PKH_031760 | -0.6802 | -1.0045 | -1.0103 | -1.0895 | -1.0733 | -1.0766 | -1.7052 |
| PKH_020680 | 0.56416 | 0.64457 | 0.30477 | -0.2041 | -0.2478 | -0.2508 | -0.2544 |
| PKH_120130 | 0.21444 | 0.23285 | 0.30736 | 0.28115 | 0.21605 | 0.24074 | -1.0572 |
| PKH_120200 | 0.32505 | 0.27671 | 0.34843 | 0.37022 | 0.47358 | 0.27392 | 0.18892 |
| PKH_112880 | -0.9486 | -1.4906 | -1.7569 | -1.4841 | -0.0185 | 0.5852  | 0.53506 |
| PKH_140870 | 0.69478 | 0.70913 | 0.64627 | 0.67841 | 0.55612 | 0.07481 | 0.07405 |
| PKH_060430 | -0.4427 | -0.2194 | -0.4655 | -0.2039 | -0.4138 | -0.4804 | -0.4643 |
| PKH_020430 | 0.22584 | 0.40585 | 0.04775 | 0.10937 | -0.1045 | -0.3352 | -0.2778 |
| PKH_040070 | 0.27987 | -0.3437 | -0.7182 | -1.118  | -0.365  | 0.83839 | 1.40101 |
| PKH_132450 | 0.17178 | 0.25172 | 0.23133 | 0.1777  | 0.02832 | 0.11173 | 0.24645 |
| PKH_041310 | -0.1444 | -0.5185 | -0.8171 | -0.8211 | 0.13972 | 0.40633 | 0.96192 |
| PKH_010260 | -1.9707 | -1.9353 | -2.105  | -2.0212 | -1.9592 | -1.884  | -2.4157 |
| PKH_073340 | -1.5881 | -1.8039 | -1.4479 | -0.7171 | -0.5091 | -0.0838 | -0.2602 |
| PKH_092150 | -1.1159 | -1.0215 | -0.5236 | -0.1826 | -0.133  | -0.0958 | -0.7636 |
| PKH_070720 | -0.3848 | -0.1202 | -0.0504 | -0.3807 | -0.2818 | -0.4153 | -0.5267 |
| PKH_051950 | -0.5993 | -0.8401 | -0.8915 | -1.165  | -0.6218 | 0.02604 | 0.15917 |
| PKH_120020 | 1.53909 | 0.92613 | 0.50892 | 0.07412 | 0.88506 | 1.75911 | 2.40988 |
| PKH_092320 | -0.9528 | -0.8499 | -0.7849 | -0.6707 | -0.7503 | -0.6112 | -0.5905 |
| PKH_100350 | 0.62568 | 0.74272 | 0.71603 | 0.8369  | 0.65442 | 0.55143 | 0.30981 |
| PKH_040910 | 0.23309 | 0.20067 | -0.1028 | 0.25141 | -0.0682 | -0.1261 | -1.327  |
| PKH_134030 | 0.47992 | 0.5307  | 0.36937 | 0.43583 | 0.43748 | 0.16804 | 0.20777 |
| PKH_112650 | 0.68143 | 0.51787 | 0.45957 | 0.65051 | 0.36083 | 0.11356 | 0.1538  |
| PKH_050160 | -0.1553 | 0.29554 | -0.5132 | -0.6677 | -1.2858 | -1.3268 | -1.4695 |
| PKH_114490 | -0.2475 | -0.0818 | 0.02924 | 0.17728 | 0.14396 | -0.1535 | 0.17113 |
| PKH_060130 | -1.7082 | -1.5033 | -1.773  | -1.6116 | -1.5799 | -1.6704 | -1.7553 |
| PKH_124130 | 0.0236  | 0.20561 | 0.06071 | 0.08468 | -0.0959 | 0.08455 | -1.2689 |
| PKH_140820 | 0.64564 | 0.62475 | 0.72711 | 0.43969 | 0.58031 | 0.53058 | 0.79812 |
| PKH_143630 | -0.2623 | -0.3479 | -0.2315 | 0.0148  | 0.06662 | 0.16973 | 0.13629 |
| PKH_142260 | 0.04607 | 0.35459 | 0.35836 | 0.58843 | 0.29076 | 0.02987 | 0.03152 |
| PKH_040310 | -0.3931 | -0.2365 | 0.79805 | 1.44456 | 1.4665  | 1.15079 | 0.93775 |
| PKH_093750 | 0.30953 | 0.39586 | 0.53403 | 0.48753 | 0.53662 | 0.11344 | -0.1925 |
| PKH_052550 | 0.22922 | 0.34255 | 0.49103 | 0.64373 | -0.471  | 0.41474 | 0.28789 |
| PKH_031310 | -0.5496 | -0.4687 | -0.1958 | -0.4785 | -0.7635 | -0.8594 | -1.1755 |
| PKH_100740 | -0.4657 | 0.05564 | -0.035  | -0.1134 | -0.1816 | -0.3945 | -0.483  |
| PKH_121640 | 0.20143 | 0.11825 | -0.0796 | -0.2708 | -0.2774 | -0.4817 | -0.193  |
| PKH_041320 | -0.2986 | -0.168  | -0.4855 | -0.6093 | -0.8464 | -0.7927 | -0.6437 |
| PKH_103180 | 0.13164 | 0.50732 | 0.46319 | 0.15004 | 0.22641 | -0.0675 | -0.9997 |
| PKH_093390 | -0.3487 | -0.2551 | 0.13986 | 0.44543 | 0.61884 | 0.63034 | 0.26546 |

|            |         |         |         |         |         |         |         |
|------------|---------|---------|---------|---------|---------|---------|---------|
| PKH_030490 | -0.7306 | -0.4699 | -0.5351 | -0.6022 | -0.3126 | -0.4644 | -0.9186 |
| PKH_102810 | 0.04002 | 0.14512 | 0.60409 | 1.38015 | 1.05083 | 0.88795 | 0.92148 |
| PKH_070730 | 0.33577 | 0.19691 | 0.11927 | -0.0718 | 0.07561 | 0.08356 | 0.1503  |
| PKH_092810 | 0.61512 | 0.62303 | 0.71605 | 0.72144 | 0.54816 | 0.44431 | 0.33337 |
| PKH_110670 | 0.12575 | 0.09465 | 0.08489 | 0.11217 | 0.19804 | 0.26571 | 0.3824  |
| PKH_061730 | 0.52223 | 0.49938 | 0.42185 | 0.17146 | 0.32006 | 0.34545 | 0.48603 |
| PKH_131450 | 0.90341 | 0.98916 | 1.07118 | 0.47825 | 0.04101 | -0.3036 | -0.6705 |
| PKH_020390 | 0.84545 | 1.05813 | 0.98532 | 0.48973 | 0.30299 | -0.0522 | -0.4351 |
| PKH_031820 | -0.9647 | -0.7833 | -0.8243 | -0.7193 | -0.7408 | -0.8342 | -1.1554 |
| PKH_146830 | -0.0549 | -0.0018 | 0.04108 | -0.0044 | 0.03766 | 0.12933 | 0.04495 |
| PKH_093690 | 0.29152 | 0.20787 | 0.31056 | 0.01745 | 0.2162  | 0.17758 | 0.46934 |
| PKH_132670 | 0.43614 | 0.28613 | 0.23306 | 0.18077 | 0.04367 | 0.08986 | -0.0167 |
| PKH_073030 | 0.54027 | 0.58099 | 0.76342 | 0.88243 | 0.84805 | 0.69827 | 0.33625 |
| PKH_132480 | 0.43009 | 0.36284 | 0.07721 | 0.21314 | 0.36125 | 0.47294 | 1.23405 |
| PKH_010700 | -0.1345 | -0.0999 | 0.02742 | -0.4438 | -0.8784 | -1.0588 | -1.4216 |
| PKH_090400 | 0.58041 | 0.62178 | 0.67322 | 0.59209 | 0.33125 | 0.1701  | 0.01455 |
| PKH_140970 | 0.14379 | 0.09337 | 0.00759 | -0.3961 | -0.2534 | -0.3359 | 0.11812 |
| PKH_071070 | 0.19614 | 0.45065 | 0.19549 | 0.2391  | 0.0159  | -0.1456 | -0.4927 |
| PKH_143350 | 0.92546 | 0.78003 | 0.73276 | 0.87709 | 1.11762 | 0.75627 | 0.91347 |
| PKH_124740 | 0.25047 | 0.07996 | 0.11712 | 0.09611 | 0.07906 | 0.14608 | 0.51388 |
| PKH_081840 | -0.5543 | -0.4406 | -0.4789 | -0.2604 | -0.2605 | -0.523  | -1.0647 |
| PKH_133250 | 0.52433 | 0.36034 | 0.12595 | -0.2038 | 0.17672 | 0.66972 | 0.71026 |
| PKH_120430 | -1.1706 | -0.8877 | -0.8748 | -0.5753 | -0.5069 | -0.2798 | -0.899  |
| PKH_051520 | -1.1308 | -1.4023 | -1.7201 | -1.7787 | -1.7382 | -1.2461 | -1.1186 |
| PKH_070090 | -0.322  | 0.01738 | 0.11194 | 0.54836 | 0.60624 | 0.52664 | 0.22534 |
| PKH_140120 | -0.0345 | -0.3966 | -0.551  | -0.838  | -0.7969 | -0.3808 | 0.2396  |
| PKH_133850 | 0.15377 | 0.1571  | 0.31026 | 0.41056 | 0.40074 | 0.23458 | 0.19857 |
| PKH_124110 | 0.62043 | 0.525   | 0.6755  | 0.76182 | 0.85957 | 0.79956 | 0.92476 |
| PKH_091900 | 0.49302 | 0.40242 | 0.52357 | 0.93605 | 1.09411 | 0.83665 | 1.25362 |
| PKH_050970 | 1.0749  | 1.0229  | 1.39411 | 1.49725 | 1.02204 | 0.82965 | 0.76349 |
| PKH_142040 | 0.39883 | 0.25989 | 0.33268 | 0.56259 | 0.68859 | 0.66709 | 0.75857 |
| PKH_134560 | 0.50039 | 0.61592 | 0.10664 | -0.535  | -0.7054 | -0.7738 | -0.5291 |
| PKH_125280 | 0.22499 | 0.27237 | 0.21931 | 0.09673 | 0.16608 | 0.22115 | 0.30709 |
| PKH_146320 | 0.75175 | 0.45279 | 0.43731 | 0.34275 | 0.18951 | 0.24681 | 0.20609 |
| PKH_145150 | 0.08972 | 0.16347 | -0.2648 | 0.0281  | 0.04075 | -0.0731 | 0.25782 |
| PKH_050190 | -0.6101 | -0.6573 | -0.3606 | -0.3985 | -0.4336 | -0.4438 | -0.7008 |
| PKH_110240 | -0.2118 | -0.0352 | 0.19353 | 0.66017 | 0.31685 | 0.35719 | 0.21408 |
| PKH_092660 | -0.8113 | -0.4088 | 0.03049 | 0.18513 | -0.017  | -0.0413 | -0.09   |
| PKH_020610 | -0.2962 | -0.3722 | -0.7768 | -0.3803 | -0.1608 | -0.4207 | -0.6666 |
| PKH_060730 | 0.24163 | 0.1619  | 0.393   | 0.37121 | 0.12922 | 0.43914 | 0.03091 |
| PKH_100700 | -0.9295 | -0.8538 | -1.0165 | -0.7663 | -0.6749 | -0.5419 | -0.4298 |
| PKH_041090 | -0.3965 | -0.4512 | -0.6169 | -0.3592 | -0.427  | -0.3567 | -0.5171 |
| PKH_110850 | 0.85507 | 0.84337 | 0.84823 | 0.87546 | 0.3132  | 0.04754 | 0.09454 |
| PKH_134140 | 0.21595 | 0.15139 | 0.156   | 0.2286  | 0.16824 | -0.2383 | -1.2119 |
| PKH_082140 | -0.0664 | 0.05951 | -0.1722 | -0.3948 | -0.4302 | -0.4234 | -0.5477 |
| PKH_051860 | 0.0252  | -0.6451 | -0.6592 | -0.2644 | 0.25822 | 0.66156 | -0.008  |
| PKH_110570 | 0.60234 | 0.4368  | 0.87352 | 0.56745 | 0.44372 | 0.542   | 0.40172 |
| PKH_052200 | -0.3989 | 0.12592 | 0.19535 | -0.0912 | -0.2372 | -0.1167 | -0.6562 |
| PKH_114720 | 0.01461 | -0.1245 | -0.1029 | -0.0183 | 0.0061  | -0.1136 | -0.3017 |
| PKH_125600 | 0.3432  | 0.38229 | 0.45003 | 0.34157 | 0.39922 | 0.37443 | 0.61004 |
| PKH_133160 | 0.39239 | 0.27936 | 0.39682 | 0.32376 | 0.3268  | 0.48164 | 0.77088 |
| PKH_142610 | 0.49881 | 0.41072 | 0.52077 | 0.02818 | 0.4457  | 0.38631 | 0.61269 |
| PKH_092460 | 0.16576 | 0.13725 | -0.1065 | -0.1839 | -0.1245 | -0.0466 | -0.1829 |
| PKH_082160 | -1.1927 | -1.1323 | -0.8617 | -0.9082 | -0.6324 | -0.6701 | -0.8755 |
| PKH_090070 | -0.1574 | -0.0801 | -0.0935 | -0.1727 | -0.0518 | -0.2106 | -0.483  |
| PKH_071850 | -0.8174 | -0.2703 | 0.09629 | 0.54588 | 0.18003 | -0.1909 | -0.3068 |
| PKH_051390 | -0.6563 | -0.6827 | -0.6912 | -0.5215 | -0.6788 | -0.6857 | -0.6986 |
| PKH_113960 | 0.03067 | 0.05296 | 0.1017  | 0.08086 | 0.19667 | 0.24966 | 0.4941  |
| PKH_030990 | -1.3506 | -1.6553 | -1.5271 | -1.03   | 0.01538 | 0.31057 | -0.1892 |
| PKH_073040 | -1.4144 | -1.3491 | -1.4777 | -1.3693 | -0.5471 | 0.12376 | -0.1449 |
| PKH_120930 | 0.36791 | 0.35194 | 0.25799 | 0.22962 | 0.0714  | 0.65768 | 1.4237  |
| PKH_071140 | 0.6182  | 0.61428 | 0.60154 | 0.84757 | 0.54735 | 0.46526 | 0.60601 |
| PKH_110930 | 0.05903 | 0.09074 | -0.0154 | 0.19253 | 0.0923  | 0.07105 | -1.0875 |

|            |         |         |         |         |         |         |         |
|------------|---------|---------|---------|---------|---------|---------|---------|
| PKH_133680 | 0.40314 | 0.44904 | 0.28965 | 0.17997 | 0.43361 | 0.24048 | 0.5294  |
| PKH_050650 | 0.63136 | 0.92902 | 0.74295 | 0.60096 | 0.16679 | -0.5014 | -0.7774 |
| PKH_083650 | 0.55121 | 0.43821 | 0.34999 | 0.23825 | 0.2844  | 0.14121 | 0.08121 |
| PKH_081400 | -0.4592 | -0.3268 | -0.7184 | -0.1506 | -0.9452 | -0.6948 | -1.3478 |
| PKH_141950 | 0.44733 | 0.37917 | 0.52171 | 0.66944 | 0.51403 | 0.38788 | 0.60442 |
| PKH_144680 | 0.05802 | 0.00195 | 0.22166 | 0.34181 | 0.34875 | 0.31394 | -0.6494 |
| PKH_052310 | -0.5947 | -0.4308 | -0.6041 | -0.3399 | -0.5606 | -0.6152 | -2.4895 |
| PKH_134280 | 0.37917 | 0.49888 | 0.15219 | 0.15268 | -0.0305 | -0.1408 | -0.0184 |
| PKH_051560 | -0.4425 | 0.0973  | 0.54081 | 0.58728 | 0.46529 | 0.28267 | -0.0013 |
| PKH_062140 | -0.5666 | -0.3693 | -0.4947 | -0.4145 | -0.4797 | -0.6176 | -1.1985 |
| PKH_124630 | 0.15996 | 0.32347 | 0.45384 | 0.47214 | 0.30826 | 0.59578 | 0.65229 |
| PKH_081360 | -0.1226 | -0.1836 | -0.2106 | -0.1141 | -0.0864 | -0.0139 | -0.6403 |
| PKH_040900 | 0.0634  | 0.09899 | 0.22722 | 0.39243 | 0.60635 | 0.41201 | 0.20427 |
| PKH_020800 | -1.4963 | -1.6985 | -1.5825 | -1.1845 | -0.84   | -0.8248 | -1.06   |
| PKH_010450 | 0.04961 | -0.2028 | 0.06088 | -0.1011 | -0.0572 | -0.157  | -1.1545 |
| PKH_125250 | 0.86462 | 0.88624 | 1.17032 | 1.19824 | 0.81589 | 0.73226 | 0.78993 |
| PKH_071790 | -0.7013 | -0.7296 | -0.5995 | -0.3519 | 0.04814 | 0.51737 | 0.37191 |
| PKH_122890 | 0.59826 | 0.5413  | 0.64095 | 0.51743 | 0.40862 | 0.42923 | 0.6544  |
| PKH_120520 | -0.5532 | -0.4517 | -0.8158 | -0.2555 | -0.3396 | -0.5074 | -1.6999 |
| PKH_122560 | 0.70085 | 0.34824 | 0.0863  | 0.0771  | 0.59016 | 1.02248 | 0.81832 |
| PKH_120420 | -0.1659 | 0.06072 | 0.48423 | 0.77471 | 0.64691 | 0.57641 | 0.01726 |
| PKH_145380 | 0.48092 | 0.29307 | 0.28212 | 0.2575  | 0.28457 | 0.43185 | 0.14368 |
| PKH_130150 | 0.89348 | 1.18321 | 1.01274 | 0.85002 | 0.39388 | 0.53796 | 1.27558 |
| PKH_082710 | 0.47165 | 0.54672 | 0.38585 | 0.20729 | 0.31235 | 0.09882 | 0.04928 |
| PKH_061840 | 0.3989  | 0.15748 | 0.05586 | -0.0102 | 0.19196 | 0.24806 | 0.54462 |
| PKH_051920 | -0.901  | -1.0599 | -1.0606 | -1.2308 | -1.0316 | -0.9787 | -0.8735 |
| PKH_092250 | 0.19798 | 0.237   | 0.19371 | -0.1351 | 0.24909 | -0.0799 | 0.39259 |
| PKH_141260 | -0.9893 | -0.3179 | -0.0461 | 0.28716 | 0.32642 | 0.23818 | 0.12446 |
| PKH_114460 | 0.8056  | 0.84945 | 0.89568 | 1.09502 | 1.02816 | 0.51526 | 0.32832 |
| PKH_131200 | -1.0399 | -1.2005 | -0.8666 | 0.48759 | 0.41657 | 0.54703 | 0.41496 |
| PKH_100690 | 0.24207 | 0.51556 | 0.76272 | 0.90302 | 0.76838 | 0.8168  | 0.88848 |
| PKH_123170 | 1.21468 | 1.20671 | 1.0235  | 1.15884 | 0.62804 | 0.40407 | 0.43707 |
| PKH_041500 | -0.282  | -0.1879 | -0.2573 | -0.2938 | -0.3295 | -0.4331 | -0.9087 |
| PKH_123710 | -0.0538 | -0.1703 | -0.1321 | -0.0717 | -0.0768 | 0.12149 | 0.10793 |
| PKH_040210 | -0.5423 | -0.1305 | -0.1827 | -0.2944 | -0.0551 | -0.2745 | -1.0416 |
| PKH_081070 | 0.16439 | 0.43576 | 0.36847 | 0.33124 | 0.30376 | 0.39785 | 0.70794 |
| PKH_113310 | -0.0227 | 0.00852 | 0.06214 | 0.09763 | 0.00673 | 0.02583 | -0.0202 |
| PKH_091260 | -0.1254 | -0.2887 | -0.6414 | -0.9569 | -1.0585 | -1.1207 | -0.5935 |
| PKH_140080 | 0.91339 | 0.66567 | 0.66154 | 1.34254 | 1.34331 | 1.29904 | 1.20239 |
| PKH_113280 | -0.1007 | 0.26646 | 0.61351 | 0.75633 | 1.10082 | 1.2375  | 0.96482 |
| PKH_050470 | -0.2572 | -0.5552 | -0.4894 | -0.3204 | -0.3638 | -0.076  | -0.4463 |
| PKH_113710 | 0.91089 | 0.62513 | 0.74299 | 0.75429 | 0.78983 | 0.87959 | 1.18067 |
| PKH_134200 | 0.12593 | -0.0117 | -0.0879 | -0.1089 | -0.2407 | -0.0213 | 0.29949 |
| PKH_122180 | 0.11021 | -0.0271 | -0.027  | 0.09882 | 0.06185 | 0.05187 | 0.12618 |
| PKH_030210 | -0.4278 | -0.0484 | -0.1584 | -0.2081 | -0.7378 | -0.7774 | -1.0646 |
| PKH_132050 | -0.3178 | -0.3306 | -0.4482 | -0.2348 | -0.2575 | -0.0466 | -0.2063 |
| PKH_120180 | -0.3607 | -0.6146 | -0.7947 | -1.1648 | -1.0418 | -0.5895 | -0.2065 |
| PKH_121510 | -0.4517 | -0.5644 | -0.6646 | -0.3174 | -0.2763 | -0.218  | -0.1093 |
| PKH_143280 | -0.1137 | -0.145  | 0.04597 | -0.1207 | -0.2494 | -0.1296 | -1.4326 |
| PKH_112720 | 0.39294 | 0.3435  | 0.51114 | 0.41089 | 0.36512 | 0.31441 | 0.40601 |
| PKH_092820 | -0.0894 | 0.03208 | -0.1031 | -0.1453 | -0.3801 | -0.3401 | -0.4589 |
| PKH_141340 | -0.0832 | 0.19877 | 0.31572 | 0.57563 | -0.0212 | -0.131  | -0.4015 |
| PKH_146180 | -0.9404 | -1.0416 | -0.7734 | -0.9236 | -0.6355 | -0.2134 | -0.0516 |
| PKH_126910 | 0.60337 | 0.56248 | 0.55513 | 0.45398 | 0.49778 | 0.45183 | 0.46567 |
| PKH_090900 | -0.0126 | 0.1172  | 0.24231 | 0.15017 | -0.1735 | -0.5529 | -0.5066 |
| PKH_110450 | 0.37332 | 0.4808  | 0.73332 | 0.46826 | 0.2702  | -0.006  | -0.7014 |
| PKH_125240 | 0.39867 | 0.46007 | 0.24128 | 0.68997 | 0.58311 | 0.31257 | 0.12756 |
| PKH_102520 | -0.4661 | -0.3857 | -0.4839 | -0.3858 | -0.2961 | -0.1842 | -0.3225 |
| PKH_030160 | 0.56523 | 0.12804 | 0.17751 | 0.67032 | 0.3609  | 0.84706 | 0.88316 |
| PKH_083210 | -0.0252 | 0.00248 | 0.01079 | -0.036  | 0.04656 | 0.20377 | -1.3343 |
| PKH_132380 | -0.1374 | -0.1672 | 0.04863 | -0.1905 | -0.0816 | -0.0972 | -0.2484 |
| PKH_121840 | -1.3808 | -2.0056 | -2.4112 | -2.2173 | -0.712  | 0.2342  | 0.51113 |
| PKH_094340 | -0.3801 | -0.3566 | -0.3478 | -0.6822 | -0.3654 | -0.3752 | -0.8137 |

|            |         |         |         |         |         |         |         |
|------------|---------|---------|---------|---------|---------|---------|---------|
| PKH_092610 | 0.5581  | 0.62854 | 0.8885  | 0.90045 | 0.43669 | 0.18002 | -0.104  |
| PKH_112080 | 0.14872 | 0.27886 | 0.28417 | 0.02663 | 0.20615 | 0.17859 | 0.18412 |
| PKH_093980 | 0.09213 | -0.2997 | -0.5927 | -0.574  | -0.4196 | -0.4479 | -0.471  |
| PKH_031590 | 0.20206 | -0.3862 | -0.3493 | 0.66338 | 1.33776 | 1.30389 | 1.53127 |
| PKH_052030 | -0.5741 | -0.4219 | -0.5767 | -0.6296 | -0.6282 | -0.5461 | -0.9198 |
| PKH_114780 | -0.1813 | -0.0376 | -0.1629 | -0.192  | -0.3028 | -0.3403 | -0.2955 |
| PKH_123380 | 0.08315 | -0.2246 | -0.0129 | 0.13917 | 0.13575 | 0.24555 | -0.9333 |
| PKH_141230 | 0.0895  | 0.24329 | 0.16163 | 0.10327 | -0.0223 | -0.1155 | -0.2986 |
| PKH_010150 | -0.4391 | -0.1899 | -0.3308 | -0.4371 | -0.5571 | -0.6532 | -1.3783 |
| PKH_132620 | -0.0189 | -0.1584 | -0.1899 | -0.4074 | -0.3138 | -0.2434 | -0.29   |
| PKH_123930 | 0.22764 | -0.0305 | 0.01423 | 0.22653 | 0.19007 | 0.36951 | 0.47518 |
| PKH_112680 | 0.19757 | -0.0307 | 0.14948 | 0.2869  | 0.14361 | -0.0546 | 0.13296 |
| PKH_092830 | -0.3297 | -0.0224 | 0.07445 | 0.17121 | 0.12524 | 0.15398 | -0.1944 |
| PKH_040240 | -0.8556 | -0.8834 | -1.1143 | -1.2999 | -1.4311 | -1.6008 | -1.7883 |
| PKH_020590 | -0.6586 | -0.4354 | -0.7171 | -0.6369 | -0.7852 | -0.8903 | -1.4492 |
| PKH_093300 | -0.2312 | -0.2915 | -0.1257 | -0.3287 | -0.2034 | 0.16037 | 0.35295 |
| PKH_101920 | -0.3592 | -0.5319 | -0.9568 | -1.5816 | -1.9183 | -1.9751 | -2.2416 |
| PKH_130640 | -0.011  | 0.10235 | 0.21485 | 0.37655 | 0.16068 | 0.14469 | -0.1966 |
| PKH_071970 | -0.0992 | -0.1172 | -0.517  | -0.7923 | -0.883  | -1.0019 | -1.1815 |
| PKH_070230 | -0.1272 | -0.2693 | -0.3864 | -0.4772 | -0.1412 | -0.0466 | -0.3702 |
| PKH_092300 | 0.24666 | 0.23666 | -0.2002 | -0.3704 | -0.8697 | -0.9978 | -1.0075 |
| PKH_050800 | -0.4428 | -0.3275 | -0.2685 | -0.3075 | -0.1385 | -0.2777 | -0.2434 |
| PKH_111890 | -0.017  | 0.05865 | -0.0355 | -0.386  | -0.0771 | -0.0766 | 0.0491  |
| PKH_080200 | 0.37816 | 0.33668 | 0.17315 | 0.0007  | -0.1371 | -0.1294 | 0.00202 |
| PKH_091050 | -0.5272 | -0.1774 | 0.00555 | 0.35528 | 0.24424 | 0.06972 | -0.497  |
| PKH_126440 | 0.21161 | 0.77351 | 0.74103 | 0.91948 | 0.35755 | -0.0182 | -0.0863 |
| PKH_144740 | 0.31312 | 0.30812 | 0.04417 | 0.07141 | 0.04356 | 0.07206 | 0.24419 |
| PKH_040470 | -0.1649 | -0.2881 | 0.1686  | -0.4866 | -0.1747 | -0.2486 | -0.4808 |
| PKH_123470 | 0.7295  | 0.44823 | 0.62111 | 0.41353 | 0.11219 | 0.13035 | 0.26212 |
| PKH_120230 | -0.049  | -0.9643 | -1.0428 | -0.857  | 0.05487 | 1.0847  | 1.33675 |
| PKH_142500 | 0.23489 | 0.02946 | -0.1953 | -0.2232 | -0.2376 | -0.2041 | 0.0755  |
| PKH_092560 | 0.08687 | -0.0072 | 0.28645 | 0.39704 | 0.46362 | 0.81779 | 0.70543 |
| PKH_145590 | 0.44085 | 0.5721  | 0.64573 | 0.5241  | 0.43075 | 0.42591 | 0.30774 |
| PKH_082900 | -0.7706 | -0.8568 | -0.9238 | -0.7958 | -0.889  | -0.9016 | -1.193  |
| PKH_100120 | 0.51399 | 0.5913  | 0.60442 | 0.42084 | 0.56067 | 0.22844 | 0.30477 |
| PKH_144260 | -0.3715 | -0.2351 | -0.2824 | -0.15   | -0.276  | 0.0095  | 0.14282 |
| PKH_052760 | 0.43735 | -0.1701 | -0.7663 | -1.1729 | -1.0528 | -0.7478 | 0.0141  |
| PKH_090970 | 0.30237 | 0.63633 | 0.75568 | 0.82757 | 0.55131 | 0.29523 | 0.16984 |
| PKH_101130 | 0.44228 | 0.65747 | 0.41466 | 0.21687 | 0.49927 | 0.22865 | -0.0984 |
| PKH_120500 | 0.18188 | 0.3867  | 0.07814 | 0.15626 | 0.1329  | -0.0068 | 0.14001 |
| PKH_121850 | 0.5828  | 0.65386 | 0.41872 | -0.1404 | -0.4769 | -0.6404 | -0.1515 |
| PKH_080030 | 0.71763 | 0.59016 | 0.50937 | 0.06911 | -0.0047 | 0.06368 | 0.8072  |
| PKH_000100 | 0.07843 | -0.1135 | -0.2221 | -0.2666 | 0.12377 | 0.29945 | 0.50813 |
| PKH_114010 | -0.1603 | -0.1941 | -0.1517 | 0.19109 | -0.2995 | -0.1693 | 0.0199  |
| PKH_070220 | 0.31787 | 0.38556 | -0.0896 | -0.1306 | 0.15012 | -0.2089 | -0.2669 |
| PKH_133600 | 0.42361 | 0.68722 | 0.83575 | 1.21085 | 0.94984 | 0.62055 | 0.43874 |
| PKH_082940 | 0.25766 | -0.1723 | 0.15245 | 0.34889 | 0.10973 | 0.1904  | 0.3219  |
| PKH_030290 | -1.2951 | -1.0437 | -0.9717 | -0.2766 | -0.698  | -0.6332 | -1.3844 |
| PKH_124060 | 0.34643 | 0.59845 | 0.94365 | 1.06754 | 0.8347  | 0.46453 | 0.67202 |
| PKH_051330 | -0.0935 | -0.1682 | -0.2395 | 0.04679 | 0.17538 | 0.51673 | 0.31027 |
| PKH_146950 | -0.3804 | -0.4855 | -0.5617 | -0.474  | -0.6234 | -0.3103 | -0.1176 |
| PKH_031210 | -0.8721 | -1.3342 | -1.4481 | -1.6367 | -1.4828 | -0.509  | -0.2258 |
| PKH_143670 | 0.02644 | 0.0016  | -0.0658 | -0.1414 | -0.1575 | -0.3595 | -0.1458 |
| PKH_010580 | -0.9634 | -0.9016 | -0.8348 | -0.9502 | -0.5217 | -0.479  | -1.1475 |
| PKH_011120 | 0.29961 | 0.13293 | 0.10993 | 0.50952 | -0.0303 | -0.3506 | -0.6381 |
| PKH_112440 | -0.2357 | -0.3507 | -0.2029 | -0.3119 | -0.221  | -0.2872 | -0.2856 |
| PKH_072910 | -0.2699 | -0.1539 | -0.1931 | -0.2771 | -0.3544 | -0.4639 | -0.9732 |
| PKH_125950 | 0.72895 | 1.034   | 1.08968 | 1.14763 | 0.80791 | 0.558   | 0.66334 |
| PKH_073300 | 0.12647 | -0.0306 | -0.0062 | -0.14   | -0.0162 | 0.32556 | 0.32631 |
| PKH_061530 | -0.2434 | -0.2665 | -0.5367 | -0.4892 | -0.4573 | -0.3477 | 0.00078 |
| PKH_124970 | 0.09419 | 0.1474  | 0.43639 | 0.56682 | 0.45263 | 0.54863 | 0.56079 |
| PKH_031750 | -1.0769 | -1.1072 | -0.7626 | -0.4483 | -0.1574 | -0.0465 | -0.4179 |
| PKH_031540 | 0.07812 | 0.17953 | -0.0329 | -0.2647 | -0.2653 | -0.5287 | -0.3179 |

|            |         |         |         |         |         |         |         |
|------------|---------|---------|---------|---------|---------|---------|---------|
| PKH_082700 | 0.4582  | 0.48947 | 0.39475 | 0.43107 | 0.31504 | 0.0733  | 0.08182 |
| PKH_083100 | -0.3567 | -0.4002 | -0.2114 | -0.3096 | -0.3094 | -0.2181 | -0.1574 |
| PKH_010620 | -0.0216 | 0.38422 | -0.257  | -0.0222 | -0.2502 | -0.075  | -0.2201 |
| PKH_112300 | -0.1905 | -0.087  | -0.2514 | -0.0137 | -0.0741 | -0.1096 | -1.4992 |
| PKH_113450 | 0.68963 | 0.47282 | 0.32354 | 0.02377 | 0.09778 | -0.0107 | 0.2969  |
| PKH_123810 | -0.1302 | -0.0148 | 0.2044  | 0.15209 | -0.0502 | -0.0914 | -0.0235 |
| PKH_051790 | -0.5375 | -0.6693 | -0.7877 | -0.166  | -0.037  | 0.03116 | -0.0671 |
| PKH_121790 | 0.00226 | -0.0589 | 0.08962 | 0.02912 | 0.07234 | 0.07362 | -0.2813 |
| PKH_141830 | 0.07343 | 0.00567 | -0.2535 | -0.1527 | -0.1851 | 0.0363  | 0.14163 |
| PKH_143590 | -0.1879 | -0.1351 | -0.2469 | -0.0846 | 0.22139 | 0.03859 | -0.4545 |
| PKH_093150 | -0.5018 | -0.4609 | -0.4827 | -0.6885 | -0.1719 | -0.2056 | -0.7229 |
| PKH_130700 | 0.09092 | -0.0763 | -0.1476 | -0.4426 | 0.06594 | -0.1926 | -0.0092 |
| PKH_133330 | 0.40795 | 0.5495  | 0.49547 | 0.00809 | 0.49763 | 0.57085 | 0.53503 |
| PKH_094450 | -0.696  | -0.8649 | -0.4944 | -0.4439 | -0.1949 | -0.0648 | -0.2684 |
| PKH_120650 | -0.6738 | -0.5836 | -0.4027 | -0.3362 | -0.4757 | -0.4414 | -0.2243 |
| PKH_123240 | -0.2862 | -0.3521 | -0.3291 | -0.4362 | -0.3579 | -0.4089 | -0.3566 |
| PKH_146670 | 0.4783  | 0.45942 | 0.6483  | 0.67657 | 0.77412 | 0.77933 | 1.137   |
| PKH_102370 | -0.3741 | -0.2478 | -0.281  | -0.2798 | -0.2835 | -0.332  | -0.7935 |
| PKH_100540 | -0.1295 | -0.3712 | -0.406  | -0.3589 | -0.5628 | -0.2467 | -0.8459 |
| PKH_146100 | -0.3562 | -0.3015 | 0.32186 | 0.56731 | 0.82124 | 0.79405 | 0.69135 |
| PKH_071010 | -0.3646 | -0.2603 | -0.344  | -0.1541 | -0.1761 | -0.1702 | -1.5414 |
| PKH_052260 | 0.45771 | 0.44294 | 0.61534 | 1.07081 | 0.38617 | 0.18108 | 0.17669 |
| PKH_060530 | 0.29142 | 0.7543  | 0.62637 | 1.0037  | 1.11839 | 0.88736 | 0.52396 |
| PKH_121470 | -0.6956 | -0.5225 | -0.3083 | -0.0432 | -0.1845 | 0.03608 | -0.1302 |
| PKH_062110 | -0.7561 | -0.9025 | -1.1623 | -1.5363 | -1.2898 | -1.2193 | -1.3065 |
| PKH_070650 | 0.19617 | 0.07955 | 0.28503 | 0.23803 | 0.34377 | 0.52338 | 0.40888 |
| PKH_120320 | -0.151  | -0.1673 | -0.1674 | -0.1707 | -0.2599 | -0.3604 | -0.6575 |
| PKH_080870 | -0.4803 | -0.2791 | -0.3628 | -0.2457 | -0.3259 | -0.4319 | -0.7312 |
| PKH_140490 | -0.1079 | -0.0765 | 0.03338 | 0.16774 | 0.26895 | 0.36875 | 0.30936 |
| PKH_081190 | 1.23486 | 1.20362 | 0.87339 | 1.0321  | 0.521   | 0.50704 | 0.7951  |
| PKH_091430 | -0.4996 | -0.3408 | -0.4757 | -0.4439 | -0.197  | -0.2937 | -1.0422 |
| PKH_133855 | 0.24583 | 0.3551  | 0.34861 | 0.18921 | 0.20848 | 0.18055 | 0.56999 |
| PKH_052360 | -0.5566 | -0.2803 | -0.1531 | -0.022  | -0.5976 | -0.4211 | -1.335  |
| PKH_094260 | 0.55607 | 0.78353 | 0.53044 | 0.40403 | 0.41592 | 0.2376  | 0.20828 |
| PKH_134250 | 0.19447 | 0.56724 | 0.56921 | 0.69404 | 0.66184 | 0.61132 | 0.35601 |
| PKH_100970 | 0.22675 | 0.56661 | 0.78565 | 1.05315 | 0.60536 | 0.393   | 0.48891 |
| PKH_126750 | -0.5682 | 0.26831 | 1.27881 | 1.551   | 1.2364  | 0.97775 | 0.0705  |
| PKH_133470 | 0.60055 | 0.57314 | 0.4914  | 0.47086 | 0.3359  | 0.2861  | 0.40333 |
| PKH_145900 | 0.03631 | -0.2138 | -0.4552 | -0.5932 | -0.6773 | -0.2063 | 0.14952 |
| PKH_112640 | -0.0868 | -0.2016 | -0.4399 | -0.8932 | -0.8431 | -0.8047 | -0.8825 |
| PKH_000760 | 0.22349 | 0.00948 | 0.09464 | -0.0879 | 0.26094 | 0.27076 | 0.37409 |
| PKH_140460 | 0.80107 | 1.18161 | 1.26004 | 1.21372 | 0.88766 | 0.43611 | 0.5354  |
| PKH_110950 | -0.0323 | -0.0862 | 0.05901 | 0.06525 | 0.018   | 0.0841  | -0.0992 |
| PKH_130670 | 0.56247 | 0.38916 | 0.48667 | 0.11965 | 0.37541 | -0.1073 | 0.03426 |
| PKH_145720 | 0.25489 | 0.01844 | 0.36084 | 0.58817 | 0.59185 | 0.4093  | 0.31109 |
| PKH_040330 | -1.211  | -1.0231 | -0.5475 | -0.0846 | -0.0011 | 0.29206 | 0.06192 |
| PKH_142380 | -0.0093 | -0.3328 | -0.8095 | -0.9128 | -0.1753 | 0.62701 | 0.61397 |
| PKH_140800 | 0.22615 | 0.06447 | -0.0873 | -0.4362 | -0.4161 | -0.5843 | -0.3024 |
| PKH_061520 | -0.4619 | -0.7247 | -0.3758 | -0.507  | -0.3902 | -0.448  | -0.5128 |
| PKH_021300 | -0.0496 | 0.29971 | 0.5553  | 0.16912 | 0.77036 | 0.59628 | 0.4104  |
| PKH_060210 | -0.0363 | 0.24288 | 0.44981 | 0.22541 | 0.18856 | 0.07283 | 0.08207 |
| PKH_102340 | -0.3224 | -0.2371 | -0.2477 | -0.1744 | -0.2997 | -0.3573 | -0.3778 |
| PKH_060870 | 0.37778 | 0.40268 | 0.36091 | 0.17878 | 0.07585 | -0.1679 | -0.1696 |
| PKH_020440 | -0.5529 | -0.2984 | -0.3593 | -0.4422 | -0.3809 | -1.5553 | -1.8593 |
| PKH_082970 | 0.57466 | 0.62476 | 0.522   | 0.128   | 0.06898 | -0.0068 | -1.3661 |
| PKH_143550 | 0.24633 | 0.11745 | 0.42372 | 0.28122 | 0.04742 | 0.19826 | 0.23829 |
| PKH_124950 | -0.2016 | 0.02273 | -0.0937 | 0.04939 | -0.0586 | -0.1902 | 0.01102 |
| PKH_142390 | -0.0259 | 0.30769 | 0.44572 | 0.49395 | 0.24211 | 0.11546 | 0.12999 |
| PKH_142680 | 0.91984 | 0.92072 | 0.99865 | 1.1227  | 0.69677 | 0.22551 | 0.21861 |
| PKH_125560 | 0.56849 | 0.61436 | 0.629   | 0.67053 | 0.36868 | 0.37784 | 0.47094 |
| PKH_040680 | 0.58334 | 0.70163 | 0.63488 | 0.64358 | 0.66338 | 0.25793 | 0.31269 |
| PKH_082770 | -0.5069 | -0.36   | -0.6136 | -0.3273 | -0.3802 | -0.3268 | -0.3344 |
| PKH_092740 | 0.13951 | 0.0733  | 0.06254 | -0.0394 | -0.0382 | 0.02455 | 0.0196  |

|            |         |         |         |         |         |         |         |
|------------|---------|---------|---------|---------|---------|---------|---------|
| PKH_122120 | -1.0471 | -0.3009 | 0.67671 | 1.08559 | 1.03018 | 0.57488 | 0.4365  |
| PKH_122450 | -0.1342 | -0.3526 | -0.3989 | -0.3735 | -0.4201 | -0.3327 | 0.07889 |
| PKH_126620 | -0.2275 | -0.2026 | -0.0408 | 0.17002 | -0.0714 | 0.21003 | 0.11046 |
| PKH_041390 | -0.3789 | -0.5203 | -0.5287 | -0.4616 | -0.5074 | -0.3968 | -0.8243 |
| PKH_040650 | 0.1803  | 0.10925 | 0.24687 | 0.20829 | 0.17011 | -0.1245 | -0.1336 |
| PKH_062000 | -0.1136 | 0.07299 | -0.0452 | -0.0246 | -0.0262 | -0.1823 | -0.216  |
| PKH_091160 | 0.01394 | 0.00425 | -0.0676 | -0.0405 | -0.0544 | -0.0574 | -0.5773 |
| PKH_082640 | -0.5587 | -0.3217 | -0.3103 | -0.1783 | -0.2348 | -0.3847 | -0.8171 |
| PKH_133140 | 0.17059 | -0.093  | -0.066  | -0.2515 | -0.0699 | -0.0387 | 0.33529 |
| PKH_132710 | 0.57943 | 0.73432 | 0.61248 | 0.39092 | 0.61632 | 0.35496 | 0.51857 |
| PKH_132230 | 0.07195 | 0.05135 | -0.0175 | 0.26564 | 0.37226 | 0.27112 | 0.34192 |
| PKH_031890 | 0.68266 | 0.84244 | 0.60157 | 0.7216  | 0.5661  | 0.60058 | 0.85344 |
| PKH_123690 | -0.2931 | -0.3781 | -0.1076 | -0.0207 | 0.024   | 0.11938 | 0.23862 |
| PKH_132880 | 0.30802 | 0.12339 | 0.10071 | 0.23136 | 0.5231  | 0.64005 | 0.93798 |
| PKH_093710 | -0.5427 | -0.6269 | -0.5841 | -0.4605 | -0.0378 | -0.3246 | -0.6219 |
| PKH_141670 | -0.184  | 0.04327 | 0.24773 | 0.298   | 0.00993 | 0.01158 | 0.01198 |
| PKH_144770 | 0.57492 | 0.63043 | 0.5791  | 0.43786 | 0.31297 | 0.29984 | 0.23297 |
| PKH_140350 | 0.72436 | 0.78984 | 0.83477 | 0.11658 | 0.96446 | 0.84117 | 0.52563 |
| PKH_011550 | -1.0907 | -1.2072 | -1.4515 | -1.284  | -0.9817 | -0.3645 | -0.5003 |
| PKH_030980 | -0.1096 | -0.0972 | -0.113  | -0.1801 | -0.1471 | -0.1004 | -0.3389 |
| PKH_127040 | 0.86857 | 0.83299 | 0.37681 | 0.02238 | -0.2814 | 0.31966 | 0.83182 |
| PKH_011190 | -0.5264 | -0.7045 | -0.9659 | -1.056  | -0.7084 | -0.1934 | -0.1184 |
| PKH_061550 | -0.6336 | -1.1984 | -0.9893 | -1.0061 | -0.1863 | 0.32597 | 0.36878 |
| PKH_052530 | -0.2051 | -0.2448 | -0.2388 | 0.03779 | -0.1681 | -0.1631 | -0.1188 |
| PKH_011740 | -0.6007 | -0.8038 | -0.8642 | -1.3729 | -1.6458 | -1.5966 | -1.0589 |
| PKH_123580 | -0.6904 | -1.1014 | -1.1168 | -1.5741 | -1.2604 | -0.6676 | 0.08577 |
| PKH_125770 | -0.2155 | -0.1182 | -0.2984 | 0.05562 | -0.2015 | -0.3326 | -0.4192 |
| PKH_101290 | 0.79178 | 0.60222 | 0.73482 | 0.69741 | 0.74394 | 0.7849  | 0.57393 |
| PKH_101200 | -0.1065 | 0.01669 | 0.21442 | 0.1944  | 0.16067 | -0.0103 | 0.27033 |
| PKH_146260 | 0.26678 | 0.05437 | -0.004  | -0.192  | -0.3302 | -0.1609 | -1.528  |
| PKH_146400 | 0.58079 | 0.61145 | 0.61184 | 0.34706 | 0.52982 | 0.24481 | 0.30092 |
| PKH_111220 | -0.0007 | 0.04614 | 0.07337 | 0.13102 | 0.0196  | -0.1033 | -0.443  |
| PKH_093090 | 0.19099 | 0.76042 | 0.96021 | 0.95006 | 1.02574 | 0.81696 | 0.80144 |
| PKH_143260 | 0.35985 | 0.24553 | 0.42722 | 0.33643 | 0.13209 | 0.51466 | 0.42745 |
| PKH_020620 | -1.6974 | -1.3436 | -0.8083 | -1.2611 | -0.3339 | -0.3666 | -0.9033 |
| PKH_050850 | -0.8259 | -0.6234 | -1.4896 | -0.518  | -0.817  | -0.3385 | -1.8188 |
| PKH_093060 | -0.7662 | -0.9657 | -0.754  | -0.4115 | -0.1122 | 0.38496 | 0.55949 |
| PKH_145850 | 0.48343 | 0.73342 | 0.75246 | 0.85718 | 0.79071 | 0.69948 | 0.58128 |
| PKH_123000 | 0.76342 | 0.81685 | 0.63902 | 0.23491 | 0.37976 | -0.0575 | 0.30748 |
| PKH_134460 | 0.38524 | 0.37493 | 0.49043 | 0.35931 | 0.3859  | 0.47009 | 0.54419 |
| PKH_060280 | -0.3544 | -0.6791 | -0.6657 | -0.381  | -0.5113 | -0.257  | 0.32776 |
| PKH_144890 | -0.2924 | -0.7654 | -1.1797 | -1.3223 | -1.1866 | -1.2211 | -1.2003 |
| PKH_093140 | 0.42321 | 0.41829 | 0.44399 | 0.32547 | 0.05175 | -0.1726 | -0.0933 |
| PKH_081830 | -0.1996 | -0.1654 | -0.3688 | 0.01073 | -0.1212 | -0.204  | -1.7148 |
| PKH_131220 | 0.10337 | 0.36861 | 0.53863 | 0.36409 | 0.46841 | 0.45777 | 0.41898 |
| PKH_031880 | -0.0694 | -0.0222 | -0.0155 | -0.0187 | -0.2319 | -0.2449 | -0.2117 |
| PKH_127080 | 0.42991 | 0.17667 | 0.16112 | 0.18407 | -0.0125 | 0.08907 | 0.26984 |
| PKH_060450 | 0.17461 | 0.15249 | 0.06921 | 0.14796 | 0.09967 | 0.08817 | -0.0829 |
| PKH_113350 | -1.0661 | -1.0047 | -0.8347 | -0.394  | -0.3562 | -0.3215 | -0.5067 |
| PKH_070160 | 0.02163 | 0.45291 | 0.45051 | 0.55358 | 0.57521 | -0.044  | -0.4209 |
| PKH_103030 | 0.21298 | 0.71594 | 1.34848 | 1.12761 | 0.85024 | 0.66997 | 0.4225  |
| PKH_102500 | 0.60725 | 0.71597 | 0.80445 | 1.12198 | 0.75535 | 0.7109  | 0.44803 |
| PKH_083700 | -0.8874 | -0.757  | -0.898  | -0.9359 | -0.3094 | 0.12463 | -0.177  |
| PKH_123480 | 0.32994 | 0.3297  | 0.4213  | 0.35402 | 0.51141 | 0.41383 | 0.4948  |
| PKH_132340 | 0.51415 | 0.56949 | 0.69265 | 0.77574 | 0.65582 | 0.53339 | 0.48542 |
| PKH_123680 | 0.10697 | -0.1086 | 0.10399 | -0.0539 | -0.0045 | 0.02104 | 0.85102 |
| PKH_071660 | -0.2956 | -0.1667 | 0.01968 | 0.04598 | 0.23032 | 0.12358 | 0.09449 |
| PKH_141020 | 0.10927 | 0.12179 | -0.0386 | -0.0398 | -0.2084 | -0.3389 | -0.4403 |
| PKH_073370 | -1.4088 | -1.8096 | -1.1334 | -0.7798 | -0.139  | 0.0219  | 0.26537 |
| PKH_011220 | -2.6899 | -2.6652 | -2.8868 | -2.4918 | -2.3762 | -2.418  | -3.9135 |
| PKH_110730 | 0.20511 | 0.21197 | 0.14654 | 0.26551 | 0.42432 | 0.11925 | -0.1402 |
| PKH_052460 | -0.0744 | -0.0712 | 0.02094 | -0.238  | -0.3151 | -0.5383 | -0.4301 |
| PKH_031720 | -0.2902 | -0.1479 | -0.2674 | -0.1485 | -0.1982 | -0.2033 | -0.5305 |

|            |         |         |         |         |         |         |         |
|------------|---------|---------|---------|---------|---------|---------|---------|
| PKH_143780 | -0.2842 | -0.2415 | -0.3987 | -0.2022 | -0.1974 | 0.16473 | 0.49835 |
| PKH_100610 | 0.45795 | 0.34561 | 0.27646 | 0.22313 | -0.1861 | -0.2842 | -0.2884 |
| PKH_051890 | -0.9985 | -0.9687 | -0.9528 | -0.9604 | -1.123  | -1.0465 | -1.9007 |
| PKH_143830 | -0.3749 | -0.2137 | -0.3761 | -0.5266 | -0.479  | -0.7029 | -0.7361 |
| PKH_121480 | 0.24016 | 0.01862 | 0.07174 | 0.14119 | 0.14825 | 0.27254 | 0.35461 |
| PKH_114300 | 0.19937 | 0.36369 | 0.57001 | 0.8695  | 0.83866 | 0.7135  | 0.7588  |
| PKH_144230 | 0.59703 | 0.5817  | 0.0589  | -0.4099 | -0.2699 | 0.04869 | 0.29518 |
| PKH_143210 | -0.139  | 0.1038  | 0.12212 | 0.38094 | 0.24275 | 0.4198  | 0.22061 |
| PKH_052060 | -0.6759 | -0.2311 | -0.3035 | -0.2664 | -0.3166 | -0.3157 | -0.5443 |
| PKH_031140 | -1.2633 | -1.0267 | -1.3299 | -1.2404 | -1.0057 | -1.1002 | -1.3377 |
| PKH_100460 | -0.7048 | -0.9675 | -1.1473 | -0.9378 | -1.0486 | -0.7693 | -0.5009 |
| PKH_123320 | 0.31697 | 0.28333 | 0.30775 | 0.40059 | 0.34982 | 0.30438 | 0.2939  |
| PKH_060300 | -0.1842 | -0.3255 | -0.2549 | -0.369  | -0.4257 | -0.4102 | -0.5909 |
| PKH_112260 | 0.47075 | 0.53422 | 0.31898 | 0.1284  | -0.0968 | -0.4206 | -0.4371 |
| PKH_000360 | -0.4951 | -0.5847 | -0.4281 | -0.5947 | -0.5108 | -0.3766 | -0.3094 |
| PKH_071950 | 0.45037 | 0.48281 | 0.30237 | 0.1805  | 0.29079 | 0.1972  | 0.17776 |
| PKH_114270 | 0.49219 | 0.44141 | 0.44065 | 0.41101 | 0.08553 | 0.0397  | 0.16659 |
| PKH_121350 | -0.2402 | -0.3348 | -0.0217 | -0.0661 | -0.127  | -0.045  | 0.01726 |
| PKH_031020 | -1.7843 | -1.6815 | -1.7281 | -1.7145 | -1.3839 | -1.6488 | -2.0684 |
| PKH_070610 | 0.061   | 0.12635 | 0.02442 | 0.28855 | -0.0542 | -0.0237 | 0.12556 |
| PKH_133990 | 0.29895 | 0.15349 | -0.0216 | -0.0421 | 0.03827 | -0.2585 | 0.08491 |
| PKH_090270 | 0.13314 | 0.19123 | 0.34074 | 0.67759 | 0.71032 | 0.49334 | 0.78665 |
| PKH_123520 | 0.46902 | 0.38455 | 0.4585  | 0.51577 | 0.30179 | 0.02591 | -0.1351 |
| PKH_113840 | 0.22067 | 0.09745 | -0.0386 | 0.00388 | 0.01441 | -0.1013 | 0.05675 |
| PKH_051190 | -0.747  | -0.6594 | -0.709  | -0.7231 | -0.7227 | -0.7423 | -1.0946 |
| PKH_073050 | -0.0506 | 0.0329  | 0.03371 | -0.4478 | -0.5864 | -0.4132 | -0.3883 |
| PKH_101890 | -0.2076 | -0.1407 | -0.0879 | -0.0227 | 0.20653 | 0.20103 | -0.1335 |
| PKH_120300 | -0.6353 | -0.7468 | -0.8466 | -0.5821 | -0.3771 | -0.1743 | -0.6602 |
| PKH_134380 | -0.3066 | -0.2971 | 0.06769 | 0.2943  | 0.16613 | 0.26059 | -0.0881 |
| PKH_100210 | -0.0323 | -0.2311 | -0.2879 | -0.2845 | -0.2004 | -0.1907 | -0.6302 |
| PKH_010600 | -0.2592 | -0.1663 | -0.5057 | -0.5066 | -0.6727 | -0.6039 | -0.4686 |
| PKH_101620 | 0.26695 | 0.06569 | -0.0022 | -0.0584 | -0.0866 | -0.3854 | -0.4565 |
| PKH_112770 | 0.22171 | 0.10855 | -0.3196 | -0.3741 | -0.5574 | -0.3736 | -0.5066 |
| PKH_141140 | 0.24658 | 0.35082 | 0.06185 | -0.0819 | 0.15825 | -0.0512 | 0.14344 |
| PKH_103190 | -1.8619 | -2.4506 | -2.3287 | -1.84   | -0.5906 | -0.0838 | -0.0813 |
| PKH_144660 | -0.4395 | -0.6579 | -0.8835 | -0.5613 | 0.15132 | 0.39287 | 0.65594 |
| PKH_110400 | 0.5082  | 0.45777 | 0.41334 | 0.39019 | 0.47764 | 0.35799 | 0.33835 |
| PKH_092060 | -0.4254 | -0.3727 | -0.4146 | -0.3652 | -0.5573 | -0.4866 | -0.9476 |
| PKH_145450 | 0.24565 | 0.15933 | 0.04745 | -0.024  | -0.1766 | -0.1608 | -0.1176 |
| PKH_110870 | 0.20331 | 0.16802 | 0.24268 | 0.24283 | 0.29941 | 0.33164 | 0.54767 |
| PKH_143110 | 0.11074 | 0.05723 | 0.13189 | 0.13414 | 0.26397 | -0.0527 | 0.02666 |
| PKH_093810 | 0.78836 | 0.66155 | 0.67256 | 0.56323 | 0.63142 | 0.65388 | 0.53808 |
| PKH_062250 | 0.12494 | 0.20911 | 0.30378 | 0.21299 | 0.05848 | 0.18661 | 0.34898 |
| PKH_083770 | 0.47156 | 0.46709 | 0.51462 | 0.44151 | 0.3321  | 0.4747  | 0.23041 |
| PKH_144650 | -0.0757 | -0.1596 | -0.1808 | -0.1534 | -0.0592 | -0.0131 | -0.0742 |
| PKH_123130 | 0.03341 | -0.0362 | 0.1806  | 0.25099 | 0.25176 | 0.34059 | 0.46862 |
| PKH_142300 | 0.52874 | 0.81704 | 0.6281  | 0.43559 | 0.48788 | 0.32634 | 0.26121 |
| PKH_143390 | -0.0692 | -0.1561 | -0.1578 | -0.0789 | 0.03762 | -0.2003 | -1.2297 |
| PKH_100480 | -0.327  | -0.1573 | -0.112  | 0.09877 | -0.2568 | -0.2592 | -0.3325 |
| PKH_131390 | 0.44317 | 0.61821 | 0.70377 | 0.64384 | 0.75348 | 0.53949 | 0.22436 |
| PKH_091590 | 0.63719 | 0.50373 | 0.25142 | 0.16668 | -0.2242 | -0.181  | 0.40925 |
| PKH_120670 | 0.66117 | 0.46788 | 0.08639 | -0.6715 | -0.9597 | -1.0794 | -0.3027 |
| PKH_120620 | -0.0534 | -0.004  | -0.1295 | 0.18713 | -0.1183 | 0.29527 | 0.64876 |
| PKH_120860 | 0.06448 | -0.0267 | -0.0743 | 0.10102 | -0.0201 | 0.11056 | -0.5649 |
| PKH_070150 | -0.2365 | -0.2327 | -0.1557 | -0.0965 | -0.0435 | -0.1028 | -0.142  |
| PKH_112090 | 0.2446  | 0.05767 | 0.21479 | 0.10891 | 0.15182 | 0.25939 | 0.46995 |
| PKH_143080 | 0.10763 | 0.2074  | 0.20918 | 0.32075 | 0.12141 | 0.05639 | -0.9807 |
| PKH_031910 | -1.0542 | -1.7558 | -1.403  | -1.6264 | -0.6694 | 0.02631 | 0.54052 |
| PKH_011470 | -1.4642 | -1.1261 | -1.1218 | -1.5573 | -1.3578 | -1.0885 | -1.5669 |
| PKH_111050 | 0.26415 | 0.42705 | 0.41008 | 0.47273 | 0.60574 | 0.25565 | 0.53294 |
| PKH_126710 | 0.24465 | 0.23845 | 0.28143 | 0.25807 | 0.39794 | 0.28872 | 0.66333 |
| PKH_050680 | -1.321  | -0.5218 | -0.5322 | -0.5557 | -0.2621 | -0.7358 | -1.736  |
| PKH_060740 | 0.50936 | 0.47804 | 0.41133 | 0.48198 | 0.30817 | 0.23153 | 0.21646 |



|            |         |         |         |         |         |         |         |
|------------|---------|---------|---------|---------|---------|---------|---------|
| PKH_125700 | 0.27795 | -0.1416 | -0.073  | -0.222  | -0.2317 | 0.08234 | 0.59266 |
| PKH_094230 | -0.3335 | -0.7039 | -0.6485 | -0.6892 | -0.3415 | -0.2623 | -0.1544 |
| PKH_124840 | 0.2605  | 0.08526 | -0.0626 | -0.271  | -0.3456 | -0.0652 | 0.19115 |
| PKH_111880 | 0.0061  | -0.1105 | -0.3458 | -0.1121 | 0.09803 | 0.44553 | 0.55946 |
| PKH_082190 | -0.3763 | -0.3597 | -0.568  | -0.2928 | -0.3577 | -0.207  | -1.0441 |
| PKH_093520 | -0.1876 | -0.2609 | -0.6606 | -0.8446 | -0.8248 | -1.0798 | -0.8809 |
| PKH_040040 | 0.77955 | 0.31968 | -0.1996 | -0.6433 | -0.495  | 0.47409 | 1.19496 |
| PKH_133860 | 0.37245 | 0.32079 | 0.21873 | 0.07618 | 0.31426 | 0.42443 | 0.8475  |
| PKH_051510 | 0.51135 | 0.30006 | -0.0656 | 0.14381 | -0.3249 | -0.1565 | -1.4578 |
| PKH_093600 | 0.22186 | 0.16668 | 0.16249 | 0.24324 | 0.07576 | 0.18652 | -1.0694 |
| PKH_101420 | 0.05351 | 0.03814 | 0.01295 | 0.05103 | 0.20109 | 0.04936 | 0.11051 |
| PKH_081960 | 0.84314 | 0.71612 | 0.52982 | 0.31006 | 0.26343 | -0.0778 | -0.1826 |
| PKH_073210 | -0.7902 | -0.863  | -0.9663 | -1.1141 | -1.0021 | -1.0228 | -1.1561 |
| PKH_134440 | -0.0585 | -0.1251 | -0.07   | -0.1646 | -0.1458 | -0.1184 | -0.0083 |
| PKH_010890 | -0.1718 | -0.1297 | -0.2632 | -0.4688 | -0.646  | -0.3306 | -0.2907 |
| PKH_050520 | -0.3524 | -0.3981 | -0.5846 | -0.3126 | -0.344  | -0.3703 | -1.8412 |
| PKH_114590 | -0.0212 | -0.1441 | 0.10221 | -0.2102 | -0.052  | -0.0643 | -0.1055 |
| PKH_030500 | -0.3397 | -1.0264 | 0.03115 | 0.08138 | 0.11124 | 0.00366 | -0.1681 |
| PKH_142210 | 0.22429 | 0.39189 | 0.25047 | 0.11984 | 0.06924 | 0.0898  | 0.12851 |
| PKH_040610 | -1.0214 | -1.0977 | -0.6925 | -1.2349 | -0.7466 | -0.7743 | -0.4185 |
| PKH_123570 | 0.26176 | 0.17676 | -0.061  | -0.3228 | -0.1716 | -0.1245 | 0.15357 |
| PKH_123620 | 0.84107 | 0.57675 | 0.85399 | 0.31028 | 0.47501 | 0.42346 | 0.74249 |
| PKH_113200 | 0.6223  | 0.57801 | 0.42457 | 0.27414 | 0.23862 | 0.19358 | 0.0974  |
| PKH_061770 | 0.77742 | 0.88131 | 0.85305 | 0.8125  | 0.80475 | 0.73183 | 0.71884 |
| PKH_061810 | 0.16446 | -0.0394 | -0.1739 | -0.1506 | -0.1194 | -0.3895 | 0.09974 |
| PKH_101740 | 0.36155 | -0.018  | -0.0568 | -0.2565 | -0.1792 | -0.0823 | -0.3263 |
| PKH_073410 | 0.18564 | -0.0576 | -0.6823 | -1.0707 | -0.9281 | -0.2912 | 0.59853 |
| PKH_126420 | 0.14337 | 0.30837 | 0.4715  | 0.53127 | 0.48162 | 0.44317 | 0.54079 |
| PKH_145220 | 0.19671 | 0.08085 | 0.10916 | 0.24191 | 0.22144 | 0.31002 | 0.38854 |
| PKH_090980 | 0.58388 | 0.2108  | 0.23291 | 0.3871  | 0.68501 | 0.65918 | 0.88656 |
| PKH_092420 | -0.0218 | 0.16141 | -0.2215 | -0.2914 | -0.051  | -0.0373 | -0.1111 |
| PKH_010190 | 0.04791 | -0.0951 | -0.8384 | -1.1968 | -1.2396 | -0.4079 | -0.194  |
| PKH_133070 | -0.01   | -0.0839 | -0.0501 | -0.1908 | -0.002  | 0.36296 | 0.67907 |
| PKH_051680 | -0.5348 | -0.5045 | -0.5832 | -0.6137 | -0.4285 | -0.6941 | -1.0167 |
| PKH_113910 | -0.4873 | -0.4815 | -0.4818 | -0.5275 | -0.4649 | -0.4451 | -0.4807 |
| PKH_140170 | 1.12259 | 1.26816 | 1.38    | 1.16755 | 0.83646 | 0.47053 | 0.66195 |
| PKH_071360 | 0.31533 | 0.09611 | 0.10303 | 0.38509 | 1.33087 | 1.36629 | 1.33563 |
| PKH_110710 | 0.51658 | 0.67026 | 0.76893 | 0.97991 | 0.63945 | 0.41934 | 0.29764 |
| PKH_052470 | -0.5064 | -0.4808 | -0.4727 | -0.567  | -0.3137 | -0.6271 | -0.7171 |
| PKH_093040 | 0.26652 | 0.36452 | 0.1135  | 0.25138 | 0.02594 | -0.0476 | -0.1308 |
| PKH_143820 | -0.1724 | -0.3696 | -0.1386 | -0.2612 | -0.1193 | -0.1479 | 0.10174 |
| PKH_092760 | -0.5838 | -0.5436 | -0.2718 | -0.004  | -0.0077 | -0.155  | -0.5187 |
| PKH_120960 | 1.1929  | 1.20132 | 1.17068 | 1.14505 | 0.77302 | 0.47598 | 0.67557 |
| PKH_010670 | -0.8874 | -0.4219 | -0.3265 | -0.6811 | -0.8911 | -1.2515 | -2.2505 |
| PKH_030850 | -0.9601 | -1.0795 | -1.318  | -1.3931 | -1.3294 | -1.5167 | -1.877  |
| PKH_080890 | 0.30361 | 0.41838 | 0.78156 | 0.59534 | 0.17966 | 0.19908 | 0.30361 |
| PKH_121200 | 0.36262 | 0.4531  | 0.51713 | 0.3866  | 0.34459 | 0.37755 | 0.44886 |
| PKH_094390 | -0.5666 | -0.4811 | -0.1889 | -0.5188 | -0.3175 | -0.2556 | -0.2206 |
| PKH_030620 | -0.1053 | 0.00174 | 0.21319 | 0.07063 | 0.43441 | 0.32553 | 0.14131 |
| PKH_112130 | 0.15358 | 0.05074 | 0.03273 | 0.15057 | -0.0273 | -0.1497 | -0.6664 |
| PKH_121500 | 0.12441 | -0.1978 | -0.1719 | -0.0757 | 0.07807 | -0.0662 | -0.2647 |
| PKH_061820 | -0.4035 | -0.5046 | -0.4873 | -0.5197 | -0.3964 | -0.6138 | -1.2735 |
| PKH_070420 | 0.68345 | 0.77923 | 0.8234  | 1.14908 | 0.58648 | 0.588   | 0.48891 |
| PKH_130210 | 0.29986 | 0.4565  | 0.59396 | 0.42769 | 0.51598 | 0.50843 | 0.69311 |
| PKH_073390 | -1.6863 | -1.3681 | -0.8185 | -0.4584 | -0.0914 | -0.1453 | -0.7474 |
| PKH_132120 | 0.60453 | 0.69796 | 1.0453  | 0.78774 | 0.82512 | 0.68033 | 0.49828 |
| PKH_145390 | 0.02811 | 0.11928 | 0.10403 | 0.14395 | -0.1763 | 0.0267  | 0.18801 |
| PKH_070540 | -0.1331 | -0.2709 | -0.1967 | -0.2727 | -0.3085 | -0.2779 | -1.4474 |
| PKH_070760 | 0.70708 | 0.63827 | 0.75495 | -0.1525 | 0.18969 | 0.19724 | 0.31523 |
| PKH_071690 | -0.7178 | -0.9141 | -1.164  | -1.2617 | -1.4885 | -1.3105 | -0.9713 |
| PKH_144150 | 0.13035 | 0.23596 | 0.31388 | 0.33062 | 0.25189 | 0.18682 | 0.04477 |
| PKH_143880 | 0.6279  | 0.64515 | 0.83429 | 0.6151  | 0.92892 | 0.75383 | 0.53649 |
| PKH_111070 | 0.57577 | 0.8817  | 0.50307 | 0.832   | 0.65653 | 0.75398 | 0.75102 |

|            |         |         |         |         |         |         |         |
|------------|---------|---------|---------|---------|---------|---------|---------|
| PKH_122670 | 0.24085 | 0.29832 | 0.64934 | 0.6813  | 0.56279 | 0.45535 | 0.60071 |
| PKH_081300 | 0.70947 | 0.53437 | 0.76719 | 0.89579 | 0.54075 | 0.5882  | 0.90617 |
| PKH_030640 | 0.50725 | 0.50285 | 0.34017 | 0.1288  | -0.0675 | -0.1836 | -0.3101 |
| PKH_112790 | 0.21383 | 0.24358 | 0.26371 | 0.0768  | -0.2486 | -0.3887 | -0.3552 |
| PKH_113660 | 0.46895 | 0.20386 | 0.5636  | 0.98426 | 1.12796 | 1.13646 | 1.10837 |
| PKH_081500 | 1.12454 | 1.15925 | 0.80803 | 0.76901 | 0.25187 | 0.02509 | 0.15946 |
| PKH_120780 | 0.70225 | 0.60996 | 0.8911  | 0.84295 | 0.95979 | 0.83274 | 0.21541 |
| PKH_101350 | -0.2372 | -0.4993 | -0.7998 | -0.8227 | -0.3407 | -0.4498 | 0.10216 |
| PKH_021000 | -0.0609 | -0.0026 | 0.07746 | 0.19609 | -0.1427 | -0.1785 | -0.1848 |
| PKH_081030 | 0.94517 | 1.4169  | 1.72805 | 1.60004 | 1.08096 | 0.33375 | -0.0679 |
| PKH_143910 | -0.2151 | -0.4098 | -0.3628 | -0.4658 | -0.3465 | -0.5691 | -0.1793 |
| PKH_111660 | 0.65877 | 0.80378 | 0.57452 | 0.45455 | 0.16091 | 0.33521 | 0.51178 |
| PKH_114610 | -0.4819 | -0.4957 | -0.0992 | 0.08547 | 0.09876 | 0.11669 | -0.0579 |
| PKH_113780 | 0.13006 | 0.14727 | 0.17702 | 0.26433 | -0.0205 | -0.0247 | -0.0513 |
| PKH_132220 | -0.346  | -0.2073 | -0.2784 | -0.1115 | -0.2368 | -0.1141 | -1.5905 |
| PKH_102560 | -0.4935 | -0.4975 | -0.584  | -0.5135 | -0.5448 | -0.5235 | -0.788  |
| PKH_110460 | 0.04591 | -0.0358 | -0.1408 | 0.09957 | 0.40829 | 0.53908 | 0.64775 |
| PKH_133340 | -0.1882 | -0.0335 | -0.297  | -0.1807 | -0.2582 | -0.1371 | -1.456  |
| PKH_040490 | 0.12378 | 0.00961 | -0.2012 | -0.0718 | 0.34191 | 0.78837 | 0.74263 |
| PKH_011720 | 0.0197  | 0.13988 | -0.2239 | -0.984  | -0.8494 | -0.7986 | -0.608  |
| PKH_113430 | 0.2353  | -0.0762 | 0.09477 | 0.15459 | 0.27925 | 0.29542 | 0.44901 |
| PKH_102000 | 0.44153 | 0.66175 | 0.72439 | 1.01622 | 0.78227 | 0.65603 | 0.44062 |
| PKH_114020 | -0.186  | -0.4834 | -0.2735 | -0.3036 | -0.3483 | -0.1123 | -0.0865 |
| PKH_011700 | 0.25937 | 0.06616 | 0.08726 | -0.1749 | 0.31301 | 0.66751 | 1.34232 |
| PKH_094280 | -0.3304 | -0.5849 | -0.5253 | 0.05254 | 0.45535 | 1.06081 | 1.00567 |
| PKH_111030 | -0.1779 | -0.0769 | -0.3119 | -0.3402 | -0.2285 | -0.1626 | -0.2492 |
| PKH_101230 | 0.80902 | 0.89772 | 0.7932  | 0.89155 | 0.63087 | 0.22429 | 0.32201 |
| PKH_113500 | -0.5582 | -0.3863 | -0.1906 | -0.4823 | -0.4355 | -0.3317 | 0.04822 |
| PKH_133210 | 0.32205 | 0.24305 | 0.25618 | 0.66683 | 1.01357 | 1.29097 | 1.37542 |
| PKH_121880 | -0.5154 | -0.0004 | 0.23977 | 0.58873 | 0.24739 | -0.9085 | -0.2241 |
| PKH_143490 | 0.1559  | -0.0597 | 0.10249 | 0.10203 | -0.0279 | 0.38401 | 0.50191 |
| PKH_080330 | -0.7873 | -0.5288 | -0.4167 | -0.1729 | -0.4504 | -0.5861 | -1.5586 |
| PKH_133230 | 0.80808 | 0.88994 | 0.89865 | 0.58452 | 0.50783 | 0.27963 | 0.4003  |
| PKH_020400 | 0.30894 | 0.11654 | -0.2055 | -0.2938 | -0.7411 | -1.0556 | -1.2513 |
| PKH_125690 | 0.37828 | 0.55773 | 0.9081  | 1.10422 | 0.77388 | 0.66512 | 0.47009 |
| PKH_140480 | 0.37333 | 0.42911 | 0.36953 | 0.52921 | 0.28396 | 0.15177 | 0.50572 |
| PKH_082960 | -0.0512 | -0.0337 | -0.3022 | -0.385  | -0.6636 | -0.7252 | -0.2241 |
| PKH_040230 | 0.54626 | 0.48593 | 0.3485  | -0.021  | 0.2785  | 0.13672 | 0.38422 |
| PKH_062020 | -0.8288 | -1.1304 | -1.055  | -0.6366 | -0.1164 | 0.46643 | 0.66066 |
| PKH_113620 | -0.0364 | -0.5171 | -0.7172 | -0.4824 | 0.26178 | 0.71974 | 1.08011 |
| PKH_126290 | -0.0984 | 0.01438 | -0.0229 | -0.0772 | -0.1118 | -0.0823 | -0.0628 |
| PKH_090090 | -0.0917 | -0.1673 | -0.1965 | -0.1227 | -0.134  | 0.07018 | -0.3663 |
| PKH_126800 | 0.18714 | 0.21433 | 0.21227 | 0.43466 | 0.47282 | 0.62831 | 0.62533 |
| PKH_122250 | 0.84637 | 1.45226 | 1.15791 | 1.69511 | 1.07659 | 0.6853  | 0.68722 |
| PKH_110380 | -0.0476 | -0.1127 | -0.0266 | -0.2366 | -0.2395 | 0.11488 | 0.45537 |
| PKH_070390 | 0.41171 | 0.21336 | 0.06787 | -0.0771 | 0.1366  | -0.0972 | -0.6124 |
| PKH_101430 | 0.03253 | -0.0094 | 0.17027 | 0.32878 | 0.00757 | -0.1951 | -0.1968 |
| PKH_020930 | -0.852  | -0.5888 | -0.6409 | -0.3799 | -0.4722 | -0.7043 | -0.9515 |
| PKH_041370 | -0.3617 | 0.23768 | -0.2719 | -0.3269 | -0.411  | -0.7782 | -1.1851 |
| PKH_124240 | -0.1449 | -0.0343 | 0.11176 | 0.42203 | 0.3588  | 0.13615 | 0.09176 |
| PKH_113550 | -0.0816 | -0.4322 | -0.1283 | -0.2356 | -0.3434 | -0.1832 | 0.01403 |
| PKH_020640 | -1.198  | -0.9688 | -0.8266 | -0.5501 | -0.4866 | -0.3777 | -0.9547 |
| PKH_125570 | 0.92129 | 0.89021 | 0.65982 | 0.60031 | 0.63564 | 0.43985 | 0.56407 |
| PKH_143730 | 0.52951 | 0.69558 | 0.66035 | 0.70803 | 0.24941 | 0.41168 | 0.15399 |
| PKH_130710 | -1.3349 | -1.3091 | -1.5621 | -1.1496 | -1.3154 | -1.464  | -2.9295 |
| PKH_061150 | 0.05639 | 0.08358 | -0.2539 | -0.0885 | -0.4809 | -0.202  | -1.6494 |
| PKH_060260 | 1.0275  | 1.19962 | 1.34629 | 1.04968 | 0.678   | 0.63711 | 0.98211 |
| PKH_101220 | -0.3035 | -0.1443 | -0.3828 | -0.6718 | -0.5877 | -0.7399 | -1.046  |
| PKH_030930 | -0.2165 | -0.2716 | 0.42459 | 0.40271 | 0.46318 | 0.27523 | -0.1897 |
| PKH_144560 | 0.08779 | -0.0911 | -0.0877 | 0.21414 | 0.07862 | -0.0304 | -0.2466 |
| PKH_131400 | -0.6491 | -0.5028 | -0.6535 | -0.4396 | -0.1548 | -0.1123 | -0.2714 |
| PKH_122000 | -0.1901 | -0.0488 | -0.1637 | -0.3505 | -0.5196 | -0.6441 | -0.2695 |
| PKH_126870 | 0.08159 | 0.20285 | 0.27991 | 0.72777 | 0.52912 | 0.36241 | -0.101  |

|            |         |         |         |         |         |         |         |
|------------|---------|---------|---------|---------|---------|---------|---------|
| PKH_081980 | -0.6571 | -0.8561 | -1.0899 | -0.5737 | -1.0841 | -1.1196 | -1.1383 |
| PKH_081230 | 0.26559 | 0.51447 | 0.29237 | 0.35678 | 0.33537 | -0.1068 | -0.0525 |
| PKH_144690 | -0.4616 | -0.5866 | -0.2742 | -0.3247 | -0.1658 | -0.214  | -0.3251 |
| PKH_060780 | -0.192  | -0.1275 | 0.14624 | 0.27621 | 0.28571 | 0.3888  | 0.2654  |
| PKH_145820 | -0.6627 | -0.6177 | -0.4495 | -0.3791 | -0.3959 | -0.3669 | -0.4849 |
| PKH_140410 | 0.60637 | 0.67556 | 0.7169  | 0.63596 | 0.56756 | 0.39461 | 0.67571 |
| PKH_082880 | 0.71464 | 0.3637  | -0.1346 | -0.277  | -0.6075 | -0.2111 | 0.5498  |
| PKH_132920 | 0.48115 | 0.75967 | 0.56369 | 0.3532  | 0.33864 | 0.19185 | 0.28015 |
| PKH_021360 | -0.2339 | 0.32291 | -0.0774 | 0.23081 | 0.27931 | -0.1293 | -0.749  |
| PKH_133000 | -0.4871 | -0.1025 | 0.29931 | 0.47673 | 0.67767 | 0.67135 | 0.71117 |
| PKH_103110 | 0.64686 | 0.45147 | -0.2286 | -0.7919 | -1.1085 | -0.9461 | -0.0748 |
| PKH_145700 | 1.01232 | 0.8597  | 0.74387 | 0.78961 | 0.89697 | 0.74218 | 1.03054 |
| PKH_070950 | 0.53288 | 0.63437 | 0.42651 | 0.42532 | 0.17703 | 0.19256 | -0.9886 |
| PKH_062170 | 0.11843 | 0.06487 | -0.0796 | -0.0943 | 0.1363  | 0.43681 | 0.50053 |
| PKH_062120 | 0.11846 | 0.01634 | 0.08014 | 0.04389 | 0.0579  | 0.10897 | -0.1104 |
| PKH_080320 | -0.0716 | -0.065  | 0.035   | -0.0497 | -0.0219 | 0.10094 | 0.15486 |
| PKH_112780 | 0.77956 | 0.75635 | 0.79937 | 0.46653 | 0.0997  | -1.1429 | -0.2037 |
| PKH_041690 | -0.0366 | -0.0823 | -0.0806 | -0.2449 | 0.27336 | 0.56416 | 0.41232 |
| PKH_010920 | -0.8016 | -0.6617 | -0.7671 | -0.8294 | -0.8835 | -0.7723 | -1.2499 |
| PKH_051230 | 1.10765 | 1.20397 | 1.05228 | 1.07492 | 0.69786 | 0.30137 | -0.0468 |
| PKH_114140 | 0.14722 | 0.084   | 0.26996 | -0.1146 | 0.08125 | 0.25199 | -0.0105 |
| PKH_060920 | -0.1509 | -0.285  | -0.2407 | 0.14371 | -0.0186 | 0.46149 | 0.69335 |
| PKH_051240 | 0.19671 | 0.04323 | -0.0308 | -0.0379 | -0.2199 | -0.146  | 0.44301 |
| PKH_093860 | 0.61478 | 0.75032 | 0.86752 | 0.66528 | 0.57961 | 0.48032 | 0.48095 |
| PKH_141410 | 0.44008 | 0.34803 | 0.522   | 0.39912 | 0.28567 | 0.22725 | -0.0575 |
| PKH_134230 | -0.0278 | -0.245  | -0.0747 | -0.0081 | -0.0088 | -0.097  | -0.9438 |
| PKH_071490 | 0.6698  | 0.80509 | 0.76546 | 0.52685 | 0.34219 | 0.3628  | 0.39632 |
| PKH_091030 | -0.4845 | -1.021  | -1.2018 | -1.077  | -0.6074 | -0.2814 | -0.2331 |
| PKH_140310 | 0.10763 | 0.27148 | 0.60567 | 0.23379 | -0.1724 | -0.2471 | -0.4039 |
| PKH_112450 | 0.32679 | 0.29259 | 0.044   | 0.34562 | 0.16954 | 0.17692 | -1.2787 |
| PKH_050660 | 0.25708 | 0.47857 | -0.2149 | -0.1595 | -0.482  | -0.6586 | -0.7688 |
| PKH_081700 | -0.1078 | -0.035  | -0.1859 | 0.26469 | 0.22889 | 0.50779 | 0.00078 |
| PKH_120380 | -0.7788 | -0.9004 | -1.0586 | -1.1311 | -1.2697 | -1.2302 | -1.4723 |
| PKH_031430 | -0.5519 | -0.1761 | -0.3243 | -0.1616 | -0.4498 | -0.6045 | -2.2948 |
| PKH_060270 | 1.00132 | 0.51223 | 0.42166 | 0.25269 | -0.1613 | -0.0683 | 0.20023 |
| PKH_072180 | -0.7669 | -0.9741 | -0.8164 | -0.4982 | -0.1903 | 0.02186 | -0.4087 |
| PKH_113650 | 0.28987 | 0.36566 | 0.13538 | 0.31718 | 0.32661 | 0.28373 | 0.05407 |
| PKH_083450 | 0.52633 | 0.70156 | 0.70248 | 0.74554 | 0.49323 | 0.48905 | 0.6648  |
| PKH_131680 | 0.24026 | 0.13503 | -0.6825 | 0.23971 | 0.34527 | 0.11456 | 0.16406 |
| PKH_133800 | -0.0796 | 0.08807 | 0.30405 | 0.23414 | -0.0311 | -0.1573 | -0.3348 |
| PKH_031900 | 0.04339 | -0.1513 | -0.4466 | -0.7475 | -0.6983 | -0.5117 | -0.0663 |
| PKH_050740 | -1.296  | -1.3001 | -1.2468 | -1.1065 | -1.1254 | -1.4924 | -3.2265 |
| PKH_143690 | -0.7258 | -0.7238 | 0.06727 | 0.52759 | 0.69038 | 0.6357  | 0.23324 |
| PKH_103150 | 0.33326 | 0.59566 | 0.43018 | 0.26687 | 0.2219  | 0.00375 | 0.06051 |
| PKH_020070 | -0.0984 | -0.4037 | -0.7143 | -1.216  | -1.2165 | -0.5314 | 0.2981  |
| PKH_081470 | 0.47098 | 0.51134 | 0.39726 | 0.07248 | -0.5789 | -0.6409 | -0.0764 |
| PKH_142890 | 0.44533 | 0.16553 | 0.0753  | 0.10287 | 0.37522 | 0.43192 | 0.96102 |
| PKH_040540 | 0.19265 | 0.25245 | 0.03967 | 0.01055 | -0.0393 | -0.0614 | 0.2487  |
| PKH_144910 | 0.17481 | 0.08876 | 0.22175 | 0.19199 | 0.08711 | -0.0249 | 0.00078 |
| PKH_031190 | -0.7506 | -0.9543 | -0.9183 | -1.5513 | -0.6637 | -0.9005 | -0.9237 |
| PKH_010100 | -2.9537 | -2.6354 | -2.9688 | -2.7378 | -2.9142 | -3.0246 | -4.271  |
| PKH_130270 | -0.2247 | -0.1338 | 0.31155 | 0.49559 | 0.68224 | 0.50461 | 0.33054 |
| PKH_051160 | -0.2915 | -0.2182 | -0.3449 | 0.19676 | 0.55711 | 0.6518  | 0.47408 |
| PKH_122630 | -1.0508 | -1.0041 | -0.5674 | -0.3885 | -0.3764 | -0.434  | -0.8968 |
| PKH_041270 | -1.2288 | -0.6818 | -0.6409 | -0.2787 | -0.5076 | -0.2775 | -1.6384 |
| PKH_112340 | 0.16602 | 0.10032 | 0.26605 | 0.61892 | 0.45822 | 0.4339  | 0.35844 |
| PKH_070003 | 0.51721 | -0.0055 | -0.3085 | -0.2702 | 0.48033 | 0.98733 | 1.42524 |
| PKH_143290 | -0.0628 | -0.1119 | -0.0629 | -0.099  | -0.0575 | -0.021  | -0.0307 |
| PKH_094370 | 0.48202 | 0.61229 | 0.88831 | 0.51213 | 0.34158 | 0.41129 | 0.86628 |
| PKH_050200 | -0.5797 | -0.7715 | -0.8763 | -0.6565 | 0.01564 | 0.88515 | 0.94706 |
| PKH_030890 | 0.1716  | -0.0099 | -0.2121 | -0.4397 | -0.2716 | -0.4777 | -0.9013 |
| PKH_060560 | -0.5504 | -0.8597 | -0.9797 | -0.6709 | -0.8027 | -0.3445 | -0.377  |
| PKH_071280 | -0.1584 | 0.04511 | -0.0453 | -0.1432 | -0.5055 | -0.394  | -0.9778 |

|            |         |         |         |         |         |         |         |
|------------|---------|---------|---------|---------|---------|---------|---------|
| PKH_081490 | -0.8571 | -1.291  | -1.3207 | -0.5758 | 0.1925  | 0.58435 | 0.44734 |
| PKH_083410 | -0.1221 | -0.1781 | -0.051  | -0.0322 | -0.097  | -0.0829 | -0.1507 |
| PKH_144530 | -0.989  | -0.9918 | -0.9703 | -1.1264 | -0.9273 | -0.7392 | -0.4751 |
| PKH_141360 | 0.04957 | 0.46999 | 0.80369 | 1.45811 | 1.37106 | 1.05435 | 1.01012 |
| PKH_110510 | -0.367  | -0.2994 | -0.242  | -0.4875 | -0.2151 | -0.2908 | -0.1903 |
| PKH_060120 | -1.4243 | -2.1635 | -2.1716 | -1.189  | 0       | 0.76278 | 0.55431 |
| PKH_030870 | -1.3258 | -1.8824 | -1.743  | -1.023  | 0.4042  | 0.67475 | 0.39406 |
| PKH_144580 | 0.21539 | 0.23614 | 0.22431 | 0.26595 | 0.27046 | 0.26811 | 0.54158 |
| PKH_131890 | -0.6467 | -1.2835 | -1.182  | -0.2444 | 0.81258 | 1.16006 | 0.71749 |
| PKH_061850 | -0.1748 | -0.548  | -0.1428 | -0.2123 | -0.2368 | -0.0892 | -0.6602 |
| PKH_142120 | 0.7335  | 0.57651 | 0.3814  | 0.32775 | 0.13582 | 0.09658 | 0.44303 |
| PKH_134330 | 0.35199 | 0.46724 | 0.53751 | 1.03859 | 1.063   | 1.08302 | 1.26826 |
| PKH_140140 | 0.18992 | 0.1354  | -0.0938 | -0.3854 | -0.4323 | -0.4156 | -0.2101 |
| PKH_051760 | -0.8721 | -0.5752 | -0.8482 | -0.6765 | -0.5964 | -0.4503 | -0.6036 |
| PKH_060140 | -1.0796 | -1.3879 | -1.2806 | -1.1742 | -0.6129 | -0.4178 | -0.5044 |
| PKH_052040 | -0.7319 | -0.474  | -0.3694 | -0.1514 | -0.1267 | -0.1381 | -0.6741 |
| PKH_030170 | -0.529  | -0.6504 | -0.7418 | -1.1979 | -0.8099 | -0.8281 | -0.5204 |
| PKH_073380 | 0.08169 | -0.0547 | -0.092  | -0.1174 | -0.1969 | -0.143  | 0.37425 |
| PKH_121420 | -0.4428 | -0.3492 | -0.2099 | -0.2768 | -0.5866 | -0.6239 | -0.2692 |
| PKH_125840 | -0.2857 | -0.4405 | -0.3432 | -0.516  | -0.5138 | -0.3358 | -0.1874 |
| PKH_124090 | -0.1031 | -0.0399 | -0.094  | -0.1241 | -0.0319 | 0.10411 | 0.10597 |
| PKH_134240 | 0.75004 | 0.64866 | 0.50581 | 0.43777 | 0.10457 | 0.43906 | 0.93888 |
| PKH_140650 | 0.51268 | 0.61353 | 0.75299 | 0.69194 | 0.87375 | 0.59539 | 0.63595 |
| PKH_072640 | 0.68794 | 0.36574 | 0.41798 | 0.35902 | 0.29601 | 0.55615 | 0.83213 |
| PKH_071640 | -0.5969 | -0.7333 | -0.7733 | -0.5807 | -0.1339 | -0.0974 | 0.18517 |
| PKH_124310 | 0.33241 | 0.62255 | 0.8605  | 1.13964 | 1.06933 | 1.18083 | 1.12333 |
| PKH_122800 | 0.21424 | -0.0858 | 0.00745 | -0.1858 | -0.3773 | -0.4727 | -0.2146 |
| PKH_145430 | -0.5653 | -0.261  | -0.6672 | -0.7946 | -0.7441 | -1.2053 | -1.5021 |
| PKH_113610 | -0.1883 | -0.5361 | -0.5326 | -0.4912 | -0.7302 | -0.4463 | -0.0668 |
| PKH_145160 | 0.21751 | 0.39862 | 0.38729 | 0.14848 | 0.04784 | -0.2582 | -0.293  |
| PKH_072510 | -0.4388 | -0.2796 | -0.2859 | -0.3206 | -0.2904 | -0.3547 | -0.2666 |
| PKH_141510 | 0.14183 | 0.48577 | 0.60778 | 0.53778 | 0.57263 | 0.65504 | 0.36234 |
| PKH_134260 | 0.11976 | 0.08132 | -0.09   | 0.1389  | 0.10591 | 0.0439  | 0.13739 |
| PKH_080590 | -1.4203 | -1.2516 | -1.0354 | -1.0887 | -0.8358 | -0.6795 | -0.6324 |
| PKH_110860 | 0.26336 | 0.59707 | 0.46657 | 0.17991 | 0.24067 | 0.23511 | -1.0614 |
| PKH_091610 | -0.5479 | -0.826  | -0.7939 | -0.2593 | 0.32773 | 0.53365 | 0.34521 |
| PKH_090040 | 0.27726 | 0.39322 | 0.3524  | 0.35217 | 0.2837  | 0.24023 | 0.2571  |
| PKH_052670 | 0.13262 | 0.30125 | 0.11011 | 0.38728 | 0.00873 | -0.1542 | -0.4594 |
| PKH_112270 | 0.42456 | 0.51516 | 0.47795 | 0.61945 | 0.35352 | 0.30364 | 0.58927 |
| PKH_041130 | 0.62807 | 0.89819 | 0.94646 | 0.6122  | 0.12805 | -0.0906 | -0.1643 |
| PKH_101580 | 0.45319 | 0.39553 | 0.07151 | 0.01082 | 0.13105 | 0.13941 | 0.20509 |
| PKH_010810 | -1.3574 | -0.9378 | -1.0818 | -0.9697 | -0.8999 | -1.06   | -1.6612 |
| PKH_041070 | -0.3806 | 0.21009 | 0.29398 | 0.592   | -0.0497 | -0.2832 | -0.577  |
| PKH_130820 | -0.0797 | -0.0718 | 0.09479 | -0.3464 | 0.21431 | 0.0815  | -0.7196 |
| PKH_031830 | -0.3889 | -0.3156 | -0.1122 | 0.24414 | 0.3859  | 0.32609 | 0.00263 |
| PKH_133840 | -0.1452 | 0.11452 | 0.11469 | 0.03355 | 0.42467 | 0.35132 | 0.44187 |
| PKH_092590 | -0.3332 | -0.3295 | -0.2011 | -0.1159 | -0.1621 | -0.2873 | -0.6185 |
| PKH_090430 | 0.73267 | 0.432   | 0.40776 | 0.44913 | 0.39719 | 0.1537  | 0.30103 |
| PKH_080840 | 0.17612 | 0.43335 | 0.03312 | 0.26787 | -0.0948 | -0.2014 | -0.4551 |
| PKH_082480 | -0.8395 | -0.8416 | -0.9316 | -1.3757 | -1.1842 | -1.0477 | -1.0898 |
| PKH_122140 | -0.1357 | 0.03417 | 0.10442 | 0.09399 | 0.13163 | 0.09023 | -0.043  |
| PKH_145070 | 0.00713 | -0.0178 | 0.12335 | 0.28864 | 0.25517 | 0.2444  | 0.03697 |
| PKH_080900 | 0.05321 | 0.20989 | 0.06079 | -0.0309 | -0.4309 | -0.7037 | -1.1951 |
| PKH_131940 | -1.0451 | -1.0681 | -1.0474 | -0.8427 | -0.8871 | -0.9755 | -0.69   |
| PKH_040395 | 0.65918 | 0.65071 | 0.66265 | 0.67269 | 0.51699 | 0.34179 | 0.23315 |
| PKH_131980 | 0.30678 | 0.11057 | 0.12888 | 0.36325 | 0.27059 | 0.15692 | -0.0154 |
| PKH_020750 | -0.5859 | -0.5756 | -0.5359 | -0.8951 | -0.8197 | -0.8994 | -1.2447 |
| PKH_133090 | 0.56364 | 0.68011 | 0.58868 | 0.42537 | 0.34791 | 0.17516 | 0.2247  |
| PKH_051660 | -0.751  | -0.4575 | -0.5724 | -0.4031 | -0.5164 | -0.6467 | -2.4989 |
| PKH_144600 | -0.6321 | -0.7131 | -0.4643 | -0.144  | 0.13721 | 0.52662 | 0.25138 |
| PKH_081390 | -0.0391 | -0.0549 | -0.0473 | 0.25229 | 0.0299  | -0.0542 | -1.3169 |
| PKH_100340 | 0.59308 | 0.54835 | 0.25996 | 0.06801 | -0.0195 | 0.11986 | 0.61866 |
| PKH_052390 | 0.35092 | 0.23347 | 0.53211 | 0.89378 | 0.68871 | 0.34987 | -0.2459 |

|            |         |         |         |         |         |         |         |
|------------|---------|---------|---------|---------|---------|---------|---------|
| PKH_081510 | -0.1202 | -0.2523 | -0.0846 | -0.1567 | 0.10694 | -0.0033 | 0.24266 |
| PKH_101530 | -0.5256 | -0.6254 | -0.5961 | -0.5584 | -0.2821 | -0.1683 | -0.1715 |
| PKH_123870 | 0.60911 | 0.26764 | -0.0008 | -0.3621 | -0.3015 | -0.1791 | 0.00826 |
| PKH_020340 | -0.1391 | -0.3492 | -0.4869 | -0.497  | -0.5738 | -0.5226 | -0.9892 |
| PKH_111340 | 0.92867 | 1.07651 | 0.81163 | 0.81835 | 0.82968 | 0.63158 | 0.49629 |
| PKH_082760 | 0.27567 | 0.0008  | 0.20522 | -0.0887 | 0.13864 | 0.08903 | 0.30726 |
| PKH_113460 | -0.3258 | -0.513  | -0.4098 | -0.7289 | -0.7794 | -0.5676 | -0.1577 |
| PKH_123950 | -0.6465 | -0.4565 | -0.1739 | 0.28206 | 0.28325 | 0.50881 | 0.45622 |
| PKH_114220 | -0.4914 | -0.3084 | -0.4464 | -0.5162 | -0.5161 | -0.682  | -0.7767 |
| PKH_030470 | -0.787  | -0.6717 | -0.7267 | -0.6163 | -0.6372 | -0.7259 | -1.169  |
| PKH_146710 | -0.1754 | -0.5132 | -0.4036 | -0.3887 | -0.3333 | -0.3109 | -0.3135 |
| PKH_130970 | -0.2767 | -0.6278 | -0.3422 | -0.9363 | -0.5861 | -0.4886 | -0.1965 |
| PKH_110220 | -0.222  | -0.072  | -0.1489 | 0.42281 | -0.0297 | 0.0163  | -0.31   |
| PKH_041230 | -1.3056 | -1.286  | -0.9412 | -0.4438 | -0.3075 | 0.0069  | -0.2087 |
| PKH_143160 | 0.01833 | 0.09165 | -0.0039 | -0.0904 | 0.07599 | 0.03281 | -0.1368 |
| PKH_144540 | -1.525  | -1.6706 | -1.2599 | -1.0197 | -0.3494 | -0.0397 | -0.0501 |
| PKH_146510 | 0.26237 | 0.50394 | 0.24138 | 0.15089 | 0.29915 | 0.35529 | 0.43679 |
| PKH_010880 | 0.66159 | 0.77615 | 0.77404 | 0.62061 | 0.32096 | 0.14956 | -0.1522 |
| PKH_031565 | 0.56959 | 0.59183 | 0.25253 | 0.52347 | 0.22774 | 0.25118 | 0.73729 |
| PKH_140920 | -0.064  | -0.1753 | -0.2691 | -0.7647 | -0.5095 | -0.1171 | 0.43866 |
| PKH_080920 | 0.07116 | 0.13866 | 0.17112 | 0.38435 | 0.08808 | -0.0167 | -0.2594 |
| PKH_131860 | -0.5729 | -0.704  | -0.8769 | -1.0672 | -1.1306 | -1.144  | -1.206  |
| PKH_111330 | 0.22301 | -0.0436 | -0.3909 | -0.5246 | -0.6449 | -0.4292 | 0.15746 |
| PKH_011460 | -1.2819 | -1.0353 | -1.0083 | -0.9938 | -0.9425 | -0.7992 | -1.1044 |
| PKH_040480 | -0.8893 | -0.588  | -0.3597 | 0.02008 | 0.07088 | 0.12231 | -0.4619 |
| PKH_020100 | 1.8586  | 1.62408 | 1.1209  | 0.38894 | 0.67584 | 1.45573 | 1.85178 |
| PKH_090080 | 0.52096 | 0.58647 | 0.39146 | 0.36371 | 0.33952 | 0.21669 | 0.04004 |
| PKH_050540 | 0.10864 | 0.18741 | 0.36386 | 0.46122 | 0.40032 | 0.27014 | 0.76722 |
| PKH_100630 | 0.23711 | -0.4435 | -0.848  | -0.8019 | 0.44082 | 0.76608 | 1.05504 |
| PKH_011530 | 0.80798 | 0.39938 | 0.67354 | 0.17978 | -0.0549 | -0.1919 | 0.15187 |
| PKH_103120 | -0.5722 | -0.4362 | -0.5089 | -0.3606 | -0.1803 | -0.2266 | -0.0669 |
| PKH_000460 | -0.1251 | -0.2787 | -0.2807 | -0.1144 | -0.1097 | -0.0377 | 0.2487  |
| PKH_142420 | 1.04901 | 1.29328 | 1.13889 | 1.1967  | 0.44604 | 0.03999 | -0.3324 |
| PKH_140810 | 0.80284 | 0.8147  | 0.40325 | 0.57331 | 0.52081 | 0.45706 | 0.80544 |
| PKH_020600 | -0.2261 | 0.2438  | -0.1538 | 0.21519 | -0.0221 | -0.2868 | -0.8121 |
| PKH_102310 | -0.3456 | -0.2271 | -0.1634 | -0.2771 | -0.3641 | -0.3352 | -0.5286 |
| PKH_092920 | -0.325  | -0.3319 | -0.298  | -0.6523 | -0.2858 | -0.271  | -0.0759 |
| PKH_081180 | 0.83868 | 0.87807 | 1.05139 | 1.15718 | 1.04864 | 0.94508 | 0.64814 |
| PKH_142740 | 0.53476 | 0.67054 | 0.40848 | 0.46078 | 0.52137 | 0.32726 | 0.05825 |
| PKH_030300 | -0.7785 | -0.6358 | -0.2899 | -0.3842 | -0.4165 | -1.2438 | -0.7812 |
| PKH_020120 | 0.34514 | 0.25091 | 0.0993  | 0.13538 | 0.01256 | -0.0909 | 0.04864 |
| PKH_102650 | 0.35038 | 0.11642 | 0.17006 | 0.65209 | 0.69269 | 0.81846 | 0.57709 |
| PKH_126650 | -0.0823 | -0.1689 | -0.2904 | -0.2733 | -0.3004 | -0.3019 | -0.3023 |
| PKH_072170 | -0.3381 | -0.5409 | 0.11452 | 0.02995 | 0.45477 | 0.44908 | 0.44778 |
| PKH_141160 | 0.40582 | 0.43319 | 0.38817 | 0.18413 | 0.06886 | -0.2916 | -0.2905 |
| PKH_140880 | 0.81527 | 0.90416 | 0.90022 | 0.71482 | 0.51743 | 0.32528 | -1.0873 |
| PKH_121690 | 0.37404 | 0.47792 | -0.0585 | 0.29141 | -0.1426 | -0.3153 | -0.2992 |
| PKH_052690 | -1.2143 | -1.785  | -1.874  | -1.004  | 0.41789 | 0.68234 | 0.44401 |
| PKH_140620 | 0.25162 | 0.10947 | 0.30594 | 0.04298 | -0.0279 | -0.0503 | -0.0547 |
| PKH_083690 | -0.6077 | -0.7105 | -0.7947 | -1.0737 | -0.6076 | -0.5243 | -0.0922 |
| PKH_021380 | 0.81313 | 0.78984 | 0.59144 | 0.12065 | -0.0206 | -0.028  | 0.63333 |
| PKH_080010 | -0.3643 | -0.5543 | -0.4162 | -0.4644 | -0.1956 | -0.6444 | -0.3173 |
| PKH_090280 | -0.5231 | -0.7816 | -0.9586 | -1.0599 | -1.0083 | -0.0581 | 0.4861  |
| PKH_144730 | 0.07814 | 0.06282 | 0.09128 | -0.048  | 0.15769 | 0.12486 | 0.25216 |
| PKH_061960 | -0.2685 | -0.2198 | -0.3622 | 0.17734 | -0.0951 | 0.01322 | -1.5043 |
| PKH_011390 | -0.3828 | -0.1005 | -0.156  | -0.1949 | -0.0678 | -0.2501 | -0.9451 |
| PKH_030480 | -0.0398 | -0.2426 | -0.272  | -0.2452 | 0.10411 | 0.1396  | 0.07491 |
| PKH_124140 | 0.65441 | 0.44868 | 0.26374 | 0.36364 | 0.3454  | 0.33937 | 0.44879 |
| PKH_040690 | 0.0046  | -0.1149 | -0.1086 | -0.2691 | -0.4207 | -0.6578 | -0.3169 |
| PKH_072280 | 0.29941 | 0.16159 | 0.16703 | 0.33581 | 0.05128 | -0.0702 | 0.19145 |
| PKH_101340 | 0.0627  | -0.144  | -0.3379 | -0.3328 | -0.6031 | -0.3998 | 0.03084 |
| PKH_011150 | -0.899  | -1.0566 | -1.0984 | -1.0473 | -0.477  | -0.1775 | -0.8311 |
| PKH_072450 | -0.566  | -0.9003 | -1.0144 | -0.806  | -0.3707 | -0.5104 | -0.2814 |

|            |         |         |         |         |         |         |         |
|------------|---------|---------|---------|---------|---------|---------|---------|
| PKH_121400 | -0.2014 | -0.1064 | -0.0637 | -0.2084 | -0.3114 | -0.4116 | -1.9868 |
| PKH_132170 | 0.74378 | 0.77268 | 0.80774 | 0.86157 | 0.68733 | 0.60522 | 0.76933 |
| PKH_126340 | -0.3058 | -0.1718 | -0.2288 | -0.1645 | -0.2198 | -0.219  | -0.4863 |
| PKH_141210 | -0.7698 | -0.6067 | -0.2147 | -0.1699 | -0.125  | -0.1182 | -0.0438 |
| PKH_051750 | 0.41063 | 0.79058 | 0.61165 | 0.59855 | 0.61802 | 0.49505 | 0.45708 |
| PKH_094500 | 0.10836 | -0.0268 | -0.127  | -0.1973 | 0.07143 | -0.0189 | -0.0393 |
| PKH_145110 | 0.48612 | 0.27474 | 0.41026 | 0.06639 | 0.10503 | 0.12471 | 0.31936 |
| PKH_083390 | -0.2729 | -0.0609 | -0.0808 | 0.12936 | 0.07794 | -0.0755 | -0.5743 |
| PKH_060150 | -1.1859 | -0.6215 | 0.00137 | -0.0951 | 0.24424 | 0.19534 | -0.2067 |
| PKH_131780 | 0.30324 | -0.3632 | -1.1892 | -1.7034 | -1.1363 | 0.0593  | 1.28828 |
| PKH_082790 | -0.0782 | -0.066  | 0.12451 | 0.04543 | 0       | 0.01083 | -1.1914 |
| PKH_091870 | -0.477  | -0.5576 | -0.0686 | 0.16296 | 0.08938 | 0.23553 | 0.13708 |
| PKH_143610 | -0.0824 | -0.1966 | -0.3088 | -0.0896 | -0.1306 | -0.1035 | -0.1069 |
| PKH_051990 | 0.09931 | 0.07504 | -0.1039 | -0.2012 | -0.2087 | -0.0379 | 0.07542 |
| PKH_123660 | 0.69455 | 0.70664 | 0.54646 | 0.35906 | 0.32026 | 0.04292 | 0.25179 |
| PKH_030310 | -1.1716 | -1.0466 | -1.0854 | -0.8576 | -0.7914 | -0.9703 | -2.261  |
| PKH_125040 | 0.31531 | 0.59784 | 0.7467  | 0.8525  | 0.75787 | 0.71792 | 0.97634 |
| PKH_070900 | -0.4149 | -0.1131 | 0.21343 | 0.21761 | 0.47208 | 0.57701 | 0.67265 |
| PKH_040730 | -0.7421 | -0.6456 | -0.8471 | -0.5083 | -0.4817 | -0.4264 | -0.6165 |
| PKH_132560 | -0.0066 | -0.048  | -0.1814 | -0.1669 | 0.15526 | 0.10373 | 0.08068 |
| PKH_051440 | -0.6165 | -1.2133 | -1.4306 | -1.7781 | -1.7179 | -1.012  | -0.1062 |
| PKH_143440 | 0.50371 | 0.54201 | 0.62193 | 0.66477 | 0.59592 | 0.30819 | 0.23862 |
| PKH_114200 | -0.1065 | 0.37374 | 0.35258 | 0.37124 | 0.27185 | 0.07071 | -0.0367 |
| PKH_060190 | 0.00603 | 0.03718 | 0.10252 | 0.06427 | 0.08354 | 0.0613  | 0.37873 |
| PKH_031080 | -1.3328 | -1.2414 | -1.3151 | -1.3752 | -0.9733 | -1.247  | -1.9227 |
| PKH_146410 | 0.12286 | 0.2528  | -0.0335 | -0.5027 | -0.8053 | -0.8469 | -0.515  |
| PKH_083640 | -0.6523 | -0.6466 | -0.821  | -0.4618 | -0.6265 | -0.72   | -1.8669 |
| PKH_121160 | -0.254  | -0.3472 | -0.387  | -0.4655 | -0.3427 | -0.4818 | -0.6346 |
| PKH_040870 | -0.243  | -0.21   | 0.0397  | 0.29051 | 0.54654 | 0.5849  | 0.44818 |
| PKH_091840 | -0.5975 | -0.8521 | -0.4315 | 0.16707 | 0.76513 | 1.04138 | 0.93618 |
| PKH_111010 | 0.44358 | 0.56887 | 0.4302  | 0.7427  | 0.44813 | 0.47377 | 0.5433  |
| PKH_050640 | -0.7738 | -0.5922 | -0.6025 | -0.4872 | -0.5962 | -0.7255 | -1.0837 |
| PKH_092580 | -0.7331 | -0.6109 | -0.634  | -0.2873 | -0.4185 | -0.4908 | -0.9034 |
| PKH_071410 | -0.011  | -0.0467 | -0.2673 | -0.3319 | -0.3737 | -0.5226 | -0.5083 |
| PKH_071350 | 0.12691 | -0.0272 | -0.0005 | -0.2127 | -0.2286 | -0.4034 | -0.344  |
| PKH_112690 | -0.3892 | -0.2008 | 0.03085 | 0.03086 | 0.03448 | -0.0455 | -0.0936 |
| PKH_123980 | 0.15617 | -0.0693 | 0.10767 | 0.04604 | 0.28526 | 0.4443  | 0.30773 |
| PKH_050990 | -0.6208 | -0.6099 | -0.5411 | -0.5355 | -0.2687 | 0.07019 | 0.17526 |
| PKH_091220 | 0.0212  | -0.0166 | 0.02339 | -0.1608 | -0.0881 | 0.10847 | -0.0702 |
| PKH_070130 | 0.67493 | 0.81338 | 0.63138 | 0.7731  | 0.75502 | 0.61777 | 0.63102 |
| PKH_093410 | -0.1843 | -0.1077 | -0.1612 | -0.1596 | 0.05323 | 0.16838 | 0.5076  |
| PKH_060840 | -0.0113 | 0.14046 | 0.30105 | 0.18626 | 0.11031 | -0.1533 | -0.0009 |
| PKH_100820 | -0.6732 | -0.8986 | -1.1519 | -1.3823 | -1.2884 | -1.1695 | -0.7918 |
| PKH_126250 | 0.74081 | 0.5007  | 0.49848 | 0.56543 | 0.47151 | 0.43402 | 0.58284 |
| PKH_010110 | -0.3572 | -0.1464 | -0.3009 | -0.479  | -0.8722 | -1.0583 | -1.7298 |
| PKH_092550 | -0.3237 | -0.275  | -0.2592 | -0.1758 | -0.159  | -0.2734 | -0.8021 |
| PKH_011580 | -1.165  | -1.2444 | -1.2515 | -1.3319 | -0.835  | -0.8576 | -1.2872 |
| PKH_091440 | 0.23175 | 0.12978 | 0.26126 | 0.14585 | 0.19379 | 0.19568 | 0.33452 |
| PKH_146110 | 0.12348 | 0.18878 | 0.39727 | 0.25666 | 0.12338 | 0.05542 | -1.213  |
| PKH_146820 | 0.68664 | 0.69338 | 0.72664 | 1.02369 | 0.43927 | 0.43623 | 0.72782 |
| PKH_061160 | 0.18161 | 0.01105 | 0.35159 | 0.29987 | 0.62383 | 0.4926  | 1.04222 |
| PKH_031000 | -0.5062 | 0.49043 | 0.44984 | 0.04762 | 0.20999 | -0.0506 | -0.7917 |
| PKH_110560 | 0.20298 | 0.313   | 0.36531 | 0.39346 | 0.18939 | -0.3174 | -0.5983 |
| PKH_143570 | -1.2449 | -1.2837 | -1.1529 | -1.1917 | -0.7692 | -0.2505 | -0.103  |
| PKH_101470 | 0.4542  | 0.51395 | 0.34395 | 0.62209 | 0.62804 | 0.26324 | 0.22325 |
| PKH_143560 | 0.0263  | -0.1527 | -0.196  | -0.1265 | -0.5144 | -0.0862 | 0.10618 |
| PKH_041600 | -1.0506 | -1.1144 | -1.2509 | -1.1761 | -1.2212 | -1.1949 | -1.4051 |
| PKH_073100 | -0.6452 | -0.8671 | -0.5793 | -0.9    | -0.8005 | -0.5266 | -0.5126 |
| PKH_051250 | 0.34724 | 0.29758 | 0.15703 | 0.1154  | 0.17021 | 0.05098 | -0.9608 |
| PKH_111450 | -0.5401 | -0.9456 | -0.4009 | -0.5292 | -0.5259 | -0.6431 | -2.0267 |
| PKH_081810 | 0.07814 | -0.0468 | -0.0245 | -0.0068 | 0.13895 | -0.0877 | 0.1914  |
| PKH_111270 | -0.2417 | -0.1974 | -0.1953 | -0.1832 | -0.1502 | -0.2171 | -0.1703 |
| PKH_052800 | 0.02489 | -0.2433 | -0.2235 | -0.4849 | -0.4527 | -0.2414 | 0.11761 |

|            |         |         |         |         |         |         |         |
|------------|---------|---------|---------|---------|---------|---------|---------|
| PKH_103220 | 0.76236 | 0.30133 | -0.0955 | -0.6772 | -0.5522 | 0.14355 | 1.36183 |
| PKH_122110 | -0.5436 | -0.6112 | -0.7737 | -0.9148 | -1.147  | -1.072  | -0.8116 |
| PKH_011420 | -0.9722 | -0.8167 | -0.9201 | -0.7578 | -0.8822 | -0.7643 | -0.6681 |
| PKH_124550 | 1.28567 | 1.23268 | 1.33109 | 1.6704  | 1.40234 | 1.20295 | 0.90471 |
| PKH_082800 | -0.0727 | -0.0687 | -0.1615 | -0.2123 | -0.3793 | -0.4361 | -0.2486 |
| PKH_031700 | -0.7931 | -1.035  | -0.8558 | -0.8449 | -0.9755 | -0.9244 | -1.3855 |
| PKH_102540 | -0.2017 | -0.5274 | -0.4013 | -0.4301 | 0.18493 | 0.67591 | 1.43794 |
| PKH_052370 | 0.17295 | 0.12797 | -0.1067 | 0.15031 | -0.1141 | -0.2311 | -0.6188 |
| PKH_093580 | -0.1641 | -0.2608 | -0.0078 | 0.33431 | 0.78769 | 1.14006 | 0.83674 |
| PKH_131430 | 0.04018 | 0.1527  | -0.078  | 0.11159 | -0.1898 | -0.1521 | -0.079  |
| PKH_142060 | 0.3151  | 0.29575 | 0.29317 | 0.24844 | 0.38592 | 0.36527 | 0.58503 |
| PKH_103100 | -0.5171 | -0.5176 | -0.5523 | -0.2667 | -0.0648 | -0.2181 | -0.4001 |
| PKH_134450 | 0.43316 | 0.47822 | 0.18589 | 0.1603  | -0.3228 | -0.1565 | 0.0938  |
| PKH_070290 | -0.4155 | -0.3125 | 0.08577 | 0.21265 | 0.17768 | 0.19532 | 0.20465 |
| PKH_050210 | -0.2333 | -0.3742 | -0.2383 | -0.3226 | -0.0696 | 0.13992 | 0.17367 |
| PKH_141970 | -0.4088 | -0.5692 | -0.2161 | 0.32097 | 0.7624  | 0.70211 | 0.98881 |
| PKH_121000 | -0.3188 | -0.1079 | -0.1187 | -0.3574 | -0.2968 | -0.1854 | -0.3243 |
| PKH_130960 | 0.43898 | 0.82461 | 0.61266 | 0.61684 | 0.3127  | 0.13515 | 0.58962 |
| PKH_121670 | 0.19358 | -0.2103 | -0.134  | -0.2733 | -0.169  | -0.3334 | -0.4475 |
| PKH_143130 | 0.33995 | 0.37961 | 0.38683 | 0.40328 | 0.2963  | -0.014  | 0.33248 |
| PKH_083670 | 0.65949 | 0.65244 | 0.92622 | 0.9689  | 1.03022 | 0.89405 | 0.61075 |
| PKH_050460 | -0.4311 | -0.2591 | -0.3368 | -0.2564 | -0.4209 | -0.433  | -1.8616 |
| PKH_146030 | 0.96747 | 1.12563 | 1.00312 | 1.11301 | 1.04961 | 0.54728 | 0.8679  |
| PKH_040740 | -1.1262 | -1.1897 | -1.3999 | -1.2791 | -1.4632 | -1.3747 | -1.7889 |
| PKH_123740 | -0.3136 | -0.1972 | -0.3771 | -0.3196 | -0.2535 | -0.1095 | -0.11   |
| PKH_134010 | -0.3728 | -0.9131 | -0.3791 | 0.48571 | 1.04332 | 1.40232 | 1.24412 |
| PKH_122860 | -0.0165 | 0.26764 | 0.43019 | 0.30497 | 0.31413 | 0.22492 | -0.023  |
| PKH_130310 | -0.5194 | -0.255  | -0.2229 | -0.1398 | -0.1683 | -0.3462 | -0.614  |
| PKH_060370 | -0.4052 | -0.276  | -0.1912 | -0.042  | -0.0566 | -0.0253 | -0.121  |
| PKH_041490 | -0.5867 | -0.3119 | -0.295  | -0.2656 | -0.6652 | -0.5742 | -0.7638 |
| PKH_140190 | 0.24404 | 0.12551 | -0.0675 | -0.4385 | -0.3155 | -0.1847 | 0.26478 |
| PKH_050430 | -0.6398 | -0.752  | -0.3878 | -0.2658 | -0.331  | -0.282  | -0.3288 |
| PKH_130320 | -0.3625 | -0.3122 | -0.3954 | -0.1843 | -0.2801 | -0.2821 | -0.243  |
| PKH_144130 | 0.54491 | 0.34262 | 0.39465 | 0.25303 | 0.26908 | -0.0025 | 0.31713 |
| PKH_132020 | 0.17938 | 0.32644 | 0.39635 | 0.58788 | 0.57549 | 0.86802 | 1.20034 |
| PKH_070580 | -0.2027 | -0.2826 | 0.09266 | 1.13436 | 1.32348 | 1.63268 | 1.30209 |
| PKH_113030 | 0.21462 | 0.27024 | 0.05999 | 0.26206 | 0.17798 | 0.11385 | 0.08182 |
| PKH_060910 | -0.6035 | -0.5238 | -0.7999 | -0.7731 | -1.1024 | -1.1567 | -1.5409 |
| PKH_040190 | -0.3629 | -0.3314 | -0.4207 | -0.3445 | -0.2599 | -0.4892 | -0.8945 |
| PKH_060180 | 0.4014  | 0.28056 | 0.17792 | 0.11086 | 0.27602 | 0.49467 | 0.22275 |
| PKH_093870 | -0.228  | -0.0285 | 0.56502 | 1.12131 | 1.00485 | 0.91894 | 0.83011 |
| PKH_100450 | 0.74759 | 0.76529 | 0.80164 | 0.87866 | 0.62523 | 0.43716 | 0.41459 |
| PKH_122340 | -1.2676 | -0.7793 | -0.4169 | -0.2793 | -0.5087 | -0.3958 | -0.6237 |
| PKH_094380 | 0.4466  | 0.21993 | 0.38949 | 0.20737 | 0.22171 | 0.03039 | 0.16625 |
| PKH_071130 | -0.0588 | -0.5422 | -0.6276 | -0.326  | 0.14157 | 0.81268 | 1.31888 |
| PKH_133740 | 0.6974  | 0.62833 | 0.8862  | 0.77697 | 0.54276 | 0.46185 | 0.4087  |
| PKH_020380 | -0.3139 | -0.3544 | -0.4216 | -1.0769 | -0.623  | -0.6826 | -0.6981 |
| PKH_130020 | 1.04446 | 0.94731 | 1.00518 | 0.6982  | 0.71272 | 0.63125 | 0.66135 |
| PKH_060340 | 0.83109 | 0.85846 | 0.64491 | 0.59974 | 0.24199 | 0.07927 | 0.55065 |
| PKH_132060 | 0.14027 | 0.18263 | 0.07495 | 0.34206 | 0.09084 | 0.02865 | 0.09517 |
| PKH_102620 | 0.20078 | 0.18521 | 0.18344 | 0.18515 | 0.36585 | 0.43252 | 0.45708 |
| PKH_144940 | 0.11738 | 0.52875 | 0.56714 | 1.18739 | 0.87639 | 0.54173 | 0.76419 |
| PKH_021030 | -0.2562 | -0.274  | -0.3276 | -0.117  | -0.2576 | -0.3045 | -0.5049 |
| PKH_100910 | -0.8635 | -0.6587 | -0.3948 | -0.4685 | -0.4262 | -0.7182 | -0.9255 |
| PKH_126550 | 0.2875  | 0.15976 | 0.06084 | -0.1229 | -0.0676 | -0.159  | -0.5594 |
| PKH_112020 | -0.5224 | -0.2413 | -0.1655 | -0.1585 | -0.4419 | -0.6781 | -2.0767 |
| PKH_113360 | 0.85145 | 0.60085 | 0.70426 | 0.70331 | 0.58982 | 0.49242 | 0.53847 |
| PKH_094010 | -0.6646 | -0.774  | -0.9869 | -0.5238 | -0.1992 | 0.13821 | 0.09347 |
| PKH_140950 | 0.2925  | 0.40631 | 0.68927 | 0.37241 | 0.06698 | 0.43439 | 0.03482 |
| PKH_030670 | -0.6257 | -0.9616 | -1.0825 | -1.2155 | -0.8412 | 0.20169 | 0.27781 |
| PKH_020030 | 0.1134  | -0.2129 | -0.9451 | -0.737  | -0.265  | 0.24507 | 0.56285 |
| PKH_143330 | -0.2215 | -0.4119 | -0.3341 | -0.3779 | -0.2016 | -0.0136 | 0.0832  |
| PKH_101080 | 0.52671 | 0.56399 | 0.50975 | 0.53249 | 0.5399  | 0.44467 | 0.49976 |

|            |         |         |         |         |         |         |         |
|------------|---------|---------|---------|---------|---------|---------|---------|
| PKH_093260 | 0.51212 | 0.39765 | 0.27149 | 0.27503 | 0.36614 | 0.1742  | -0.0865 |
| PKH_030120 | -0.206  | 0.05559 | 0.49664 | 0.62542 | 0.84139 | 0.58791 | 0.35671 |
| PKH_020920 | -0.5597 | -0.7089 | -0.5202 | -0.0323 | 0.0471  | 0.24803 | 0.17061 |
| PKH_122740 | 1.11486 | 1.27866 | 1.3112  | 1.43275 | 1.25812 | 0.86832 | 1.13866 |
| PKH_091950 | 0.15204 | 0.06901 | 0.10759 | 0.23276 | 0.33031 | 0.07273 | -0.2007 |
| PKH_093680 | 0.1515  | 0.07929 | 0.04338 | -0.2971 | -0.1009 | -0.0563 | 0.01093 |
| PKH_082850 | -0.1097 | -0.3072 | -0.5709 | -0.3138 | -0.5099 | -0.4506 | -0.4605 |
| PKH_143230 | 0.2524  | 0.07463 | 0.17664 | 0.05128 | -0.0759 | 0.00497 | -1.2805 |
| PKH_111510 | 0.52172 | 0.55514 | 0.42544 | 0.54664 | 0.37527 | 0.13715 | 0.02219 |
| PKH_093550 | -0.7283 | -0.832  | -0.8193 | -0.7913 | -0.6122 | -0.5667 | -0.7571 |
| PKH_131280 | 0.23246 | 0.2069  | 0.01336 | -0.1076 | -0.041  | -0.085  | -0.0553 |
| PKH_050390 | 0.73894 | 0.38804 | 0.2459  | 0.26165 | 0.17835 | 0.11383 | 0.49473 |
| PKH_082540 | -0.0351 | -0.0197 | 0.02954 | 0.08374 | -0.0559 | -0.2335 | -1.6484 |
| PKH_021390 | 0.08047 | -0.0126 | 0.08113 | -0.0532 | -0.0999 | -0.0806 | 0.15239 |
| PKH_121300 | -0.0737 | -0.0885 | -0.1513 | -0.0785 | -0.0484 | 0.10714 | 0.22873 |
| PKH_110800 | -0.0071 | -0.1044 | -0.1698 | -0.283  | -0.328  | -0.2969 | -0.3325 |
| PKH_021010 | -1.0744 | -0.8497 | -1.0229 | -1.2056 | -1.2823 | -1.1645 | -1.8167 |
| PKH_125920 | 0.26969 | 0.22856 | 0.29881 | 0.26994 | 0.29157 | 0.46476 | 0.39404 |
| PKH_121930 | 0.06789 | -0.0265 | -0.1934 | -0.1354 | -0.2596 | -0.3565 | -0.1113 |
| PKH_051580 | 0.25362 | 0.6797  | 0.46278 | 0.49922 | 0.14979 | -0.1188 | -0.6759 |
| PKH_010400 | -0.3949 | -0.3552 | -0.0374 | 0.16145 | 0.59424 | 0.59326 | -0.2607 |
| PKH_070460 | -0.4037 | -0.4079 | -0.1747 | 0.23814 | 0.23291 | 0.35826 | -0.1855 |
| PKH_125500 | 0.05759 | 0.18421 | 0.25635 | -0.008  | 0.0963  | 0.07203 | -1.2388 |
| PKH_142270 | 0.37099 | 0.24495 | 0.24809 | 0.18389 | 0.0506  | -0.1185 | -0.8151 |
| PKH_050670 | 0.05242 | 0.15692 | 0.36063 | -0.0344 | 0.05934 | 0.0104  | -0.3993 |
| PKH_132225 | 0.24844 | 0.04914 | -0.0211 | -0.3714 | -0.1835 | -0.2585 | -0.0799 |
| PKH_092690 | 0.56928 | 0.54325 | 0.25466 | 0.01513 | -0.2132 | -0.098  | -0.0295 |
| PKH_145140 | 0.28191 | 0.5476  | 0.57351 | 0.56148 | 0.62078 | 0.43939 | 0.41478 |
| PKH_082060 | -0.121  | -0.2999 | -0.1557 | -0.2682 | -0.2893 | -0.2032 | -0.1043 |
| PKH_146050 | -0.5061 | -0.5397 | -0.606  | -0.4811 | 0.09703 | 0.12031 | -0.0443 |
| PKH_100040 | 0.14611 | -0.093  | -0.1713 | -0.5073 | -0.4723 | -0.2012 | 0.46201 |
| PKH_021320 | -0.1839 | 0.15457 | 0.08115 | 0.46757 | 0.13017 | -0.1404 | -0.3176 |
| PKH_121430 | -0.208  | -0.1246 | -0.0005 | 0.05086 | 0.04538 | -0.0419 | -0.7305 |
| PKH_011750 | 0.71325 | 0.81643 | 0.72397 | 0.14981 | 0.15118 | 0.3583  | 0.92577 |
| PKH_122660 | -0.2179 | -0.305  | -0.4325 | -0.6052 | -0.7715 | -0.885  | -0.5334 |
| PKH_060050 | 0       | 0.12307 | -0.3132 | -1.0165 | -1.2298 | -1.7255 | -2.8744 |
| PKH_113790 | 0.40596 | 0.53976 | 0.69212 | 0.59954 | 0.36433 | 0.30457 | 0.16246 |
| PKH_122590 | 0.13863 | 0.18117 | 0.11191 | -0.0951 | -0.0688 | 0.17896 | 0.38314 |
| PKH_091510 | -0.1629 | -0.0972 | 0.10422 | 0.20568 | -0.133  | -0.0599 | 0.14412 |
| PKH_123040 | 0.22504 | 0.43157 | 0.45147 | 0.31404 | 0.40995 | 0.45786 | 0.34881 |
| PKH_114470 | 0.05739 | 0.11895 | -0.3763 | -0.0835 | -0.2519 | -0.472  | -0.5324 |
| PKH_080240 | -0.0616 | -0.0898 | -0.3738 | 0.05763 | -0.4094 | -0.2782 | -0.3175 |
| PKH_112820 | 0.20881 | 0.82529 | 1.53275 | 0.96431 | 0.90137 | 1.12255 | 1.52862 |
| PKH_040010 | -0.271  | -0.3644 | -0.4409 | -0.3501 | -0.3199 | -0.059  | -0.0656 |
| PKH_052620 | -0.8852 | -1.0694 | -1.2509 | -1.6063 | -1.3955 | -1.2232 | -1.2826 |
| PKH_113630 | 0.00235 | -0.0922 | -0.2392 | 0.00374 | -0.1691 | -0.1381 | -1.3415 |
| PKH_131010 | 0.38906 | 0.28645 | 0.48918 | 0.31684 | 0.40724 | 0.36291 | 0.20146 |
| PKH_133650 | -0.4645 | -0.2139 | 0.19689 | 0.23453 | 0.23362 | 0.09122 | 0.01321 |
| PKH_020820 | -0.4314 | -0.3889 | -0.4837 | -0.7462 | -0.7232 | -0.8544 | -1.616  |
| PKH_140360 | 0.02693 | 0.05252 | 0.16529 | 0.22715 | 0.15278 | -0.005  | -1.2453 |
| PKH_093850 | 0.21771 | 0.14635 | 0.19215 | 0.24115 | 0.28478 | 0.13558 | 0.0018  |
| PKH_113000 | -0.586  | -0.4018 | -0.1517 | -0.0469 | -0.0794 | -0.0833 | -0.5121 |
| PKH_052780 | -0.1227 | -0.3916 | -0.6795 | -1      | -0.9493 | -0.5754 | 0.11119 |
| PKH_112920 | 0.47391 | 0.58893 | 0.71292 | 0.85942 | 0.43392 | 0.29403 | 0.14915 |
| PKH_120250 | 0.72234 | 0.65387 | 0.45016 | 0.35587 | 0.05347 | -0.0457 | 0.16904 |
| PKH_127050 | 0.78513 | -1.1947 | 0.26818 | 0.06334 | 0.09451 | 0.22422 | 0.58224 |
| PKH_114260 | 1.04867 | 0.74172 | 0.63002 | 0.81123 | 0.33566 | 0.10296 | 0.25391 |
| PKH_130110 | 0.4719  | 0.6118  | 0.66068 | 0.64091 | 0.63641 | 0.31683 | 0.33873 |
| PKH_132270 | 0.82243 | 1.15493 | 1.16594 | 1.27079 | 0.81308 | 0.66856 | 0.80231 |
| PKH_144950 | -0.8027 | -0.7335 | -0.695  | -0.0291 | -0.5287 | -0.5434 | -0.2832 |
| PKH_131060 | 0.85347 | 0.82363 | 0.96797 | 0.99778 | 0.50966 | 0.24121 | 0.0249  |
| PKH_131480 | 0.4261  | 0.41752 | 0.29603 | 0.23456 | 0.18395 | 0.37642 | 0.5829  |
| PKH_132140 | 0.05159 | 0.47622 | 0.57039 | 0.7247  | 0.81211 | 0.32895 | -0.1021 |



|            |         |         |         |         |         |         |         |
|------------|---------|---------|---------|---------|---------|---------|---------|
| PKH_000370 | 0.11026 | -0.4186 | 0.14898 | 0.0332  | -0.2534 | -0.2243 | -1.008  |
| PKH_090700 | 0.59657 | 0.38456 | 0.75726 | 0.35845 | 0.38821 | 0.30309 | 0.73539 |
| PKH_114790 | 0.30049 | 0.40755 | 0.55227 | 0.53887 | 0.50525 | 0.35625 | 0.16262 |
| PKH_102830 | 0.66063 | 0.58642 | 0.73512 | 0.71006 | 0.47833 | 0.28907 | 0.04228 |
| PKH_145010 | 0.30097 | 0.41686 | 0.26915 | 0.19528 | -0.184  | -0.2677 | 0.03783 |
| PKH_141730 | 0.14788 | 0.16759 | 0.26403 | 0.21037 | 0.03846 | -0.0063 | -0.2655 |
| PKH_090380 | 0.79673 | 0.97653 | 0.6699  | 0.288   | 0.12892 | -0.2394 | -0.2627 |
| PKH_031510 | -0.4503 | -0.5377 | -0.6983 | -0.6223 | -0.6514 | -0.6865 | -1.4912 |
| PKH_102690 | 0.90464 | 0.72509 | 0.66271 | 0.43034 | 0.47373 | 0.34008 | 0.60123 |
| PKH_011280 | -2.5666 | -2.2888 | -2.439  | -2.5298 | -2.2987 | -2.3768 | -3.9675 |
| PKH_100170 | -0.6973 | -0.4903 | -0.1609 | -0.3984 | -0.5007 | -0.1705 | 0.03529 |
| PKH_101030 | 0.15665 | 0.20723 | 0.6983  | 0.66635 | 0.90874 | 0.98276 | 0.92696 |
| PKH_111680 | -0.2209 | -0.189  | -0.089  | -0.1288 | -0.2205 | -0.2183 | -0.6085 |
| PKH_090010 | 0.54672 | 0.4341  | 0.10951 | 0.05062 | -0.44   | -0.5198 | -0.0136 |
| PKH_121040 | 1.22927 | 1.33543 | 1.11496 | 0.95478 | 0.89768 | 0.96487 | 1.04253 |
| PKH_113830 | -0.0199 | -0.3603 | -0.2185 | -0.4281 | -0.5444 | -0.3984 | -0.1972 |
| PKH_081910 | -0.3417 | -0.379  | -0.1321 | -0.443  | -0.478  | -0.3496 | -0.4409 |
| PKH_060510 | -0.3463 | -0.4467 | -0.3482 | -0.431  | -0.39   | -0.2435 | -0.1336 |
| PKH_123610 | -0.1492 | -0.371  | -0.5233 | -0.7419 | -0.3144 | -0.2243 | 0.11664 |
| PKH_144750 | 0.31753 | 0.54294 | 0.30741 | 0.01979 | -0.2006 | -0.1962 | -0.1089 |
| PKH_061280 | 0.38477 | 0.2071  | 0.09468 | 0.18321 | 0.35699 | 0.30511 | 0.21721 |
| PKH_146590 | -0.6292 | -0.421  | -0.4479 | -0.2284 | -0.3843 | -0.473  | -0.3773 |
| PKH_090870 | 0.3364  | 0.61338 | 0.72673 | 0.83821 | 0.39177 | 0.08037 | 0.19857 |
| PKH_132490 | 0.39606 | 0.36519 | 0.47512 | 0.58249 | 0.43233 | 0.05008 | 0.03351 |
| PKH_146600 | 0.38041 | 0.18985 | 0.32387 | 0.09852 | 0.37394 | 0.26589 | 0.23079 |
| PKH_113980 | 0.01575 | -0.0848 | -0.1406 | -0.1111 | -0.152  | -0.1823 | -0.4974 |
| PKH_125390 | 0.35417 | 0.28018 | 0.11956 | -0.0119 | -0.036  | 0.19404 | 0.45661 |
| PKH_031200 | 0.54499 | 0.75322 | 0.83087 | -0.1476 | 0.37587 | -0.1788 | -0.7191 |
| PKH_093180 | 0.11774 | 0.10951 | 0.05526 | -0.0675 | 0.07426 | -0.0444 | 0.03137 |
| PKH_126330 | 0.31921 | 0.52425 | 0.44813 | 0.51467 | 0.3826  | 0.46403 | 0.17449 |
| PKH_071520 | -0.0527 | 0.12389 | 0.23769 | 0.20172 | 0.2374  | 0.28265 | 0.03958 |
| PKH_112070 | 1.00157 | 0.98634 | 1.18899 | 0.99045 | 0.52888 | 0.36756 | 0.18251 |
| PKH_052000 | -1.0788 | -0.7628 | -0.5225 | -0.4716 | -0.0731 | -0.2946 | -0.6898 |
| PKH_060860 | 0.10677 | 0.46155 | 0.52873 | 0.44835 | 0.15076 | 0.06488 | -0.0021 |
| PKH_100020 | -0.4302 | -0.7275 | -1.0624 | -0.7802 | -0.5305 | -0.3217 | -0.4192 |
| PKH_051830 | -0.9766 | -0.8588 | -0.6942 | -0.217  | -0.1467 | -0.0445 | -0.6419 |
| PKH_142250 | 0.61211 | 0.52618 | 0.43249 | 0.48962 | 0.64275 | 0.41823 | 0.79938 |
| PKH_061910 | -0.2483 | 0.00631 | 0.12428 | 0.19064 | 0.13617 | -0.1199 | -0.2576 |
| PKH_000540 | 0.76192 | 0.3161  | 0.173   | -0.1754 | 0.25693 | 0.64411 | 1.3317  |
| PKH_126700 | 0.53713 | 0.41857 | 0.57384 | 0.52764 | 1.01166 | 1.00658 | 0.50905 |
| PKH_113900 | 0.24399 | 0.61568 | 0.53004 | 0.60459 | 0.12061 | 0.03148 | -0.2802 |
| PKH_146440 | 0.19075 | 0.11363 | 0.28048 | 0.46824 | 0.17747 | 0.09345 | 0.37601 |
| PKH_141120 | 0.74759 | 0.94899 | 0.82412 | 0.42022 | 0.99983 | 0.92082 | 0.39275 |
| PKH_113330 | 0.79313 | 0.88965 | 1.16776 | 1.0408  | 0.7134  | 0.56257 | 0.70712 |
| PKH_093940 | -0.1258 | -0.2318 | -0.2377 | -0.3515 | -0.3129 | -0.3962 | -0.3268 |
| PKH_000070 | 0.05677 | -0.0628 | 0.05008 | -0.119  | -0.0398 | -0.0305 | -0.3486 |
| PKH_112360 | 0.57147 | 0.59305 | 0.59285 | 0.54037 | 0.4102  | 0.21918 | 0.58064 |
| PKH_121230 | -0.2568 | -0.2405 | -0.5699 | -0.6206 | -0.5489 | -0.5472 | -0.3772 |
| PKH_131140 | 1.12308 | 1.03241 | 0.97613 | 0.941   | 0.58056 | 0.31804 | 0.24615 |
| PKH_141560 | 0.20169 | 0.08805 | 0.43988 | 0.27503 | 0.55997 | 0.27941 | 0.32594 |
| PKH_101320 | 0.25828 | 0.19367 | 0.18174 | 0.4496  | 0.44577 | 0.45043 | 0.28538 |
| PKH_102490 | -0.5985 | -0.5375 | -0.2742 | -0.1443 | -0.5133 | -0.3545 | -0.4001 |
| PKH_145460 | -0.0391 | 0.16368 | 0.17236 | 0.16984 | 0.00439 | 0.20433 | -0.0235 |
| PKH_122360 | 0.31916 | 0.20796 | 0.18135 | 0.53732 | 0.84616 | 0.40102 | 0.44149 |
| PKH_030800 | 0.06445 | -0.2185 | 0.41147 | 0.96308 | 1.33963 | 1.43158 | 1.01084 |
| PKH_093210 | 0.38709 | 0.37576 | 0.10459 | -0.1578 | -0.0861 | 0.18263 | 0.25634 |
| PKH_146790 | 0.53603 | 0.35902 | 0.48374 | 0.2517  | 0.59637 | 0.67156 | 0.94164 |
| PKH_144630 | -0.6551 | -0.6508 | -0.7612 | -1.1466 | -0.568  | -0.5559 | -0.4298 |
| PKH_082000 | 0.05763 | 0.48142 | 0.6843  | 0.88164 | 0.7256  | 0.74525 | 0.53464 |
| PKH_130100 | 0.05052 | 0.01011 | 0.09258 | -0.044  | 0.03237 | 0.05538 | 0.15615 |
| PKH_071590 | -0.2768 | -0.5072 | -0.7795 | -0.5012 | 0.44616 | 0.62987 | 0.36398 |
| PKH_021160 | -1.2447 | -0.9038 | -1.2403 | -1.3418 | -1.3919 | -1.5537 | -1.8649 |
| PKH_144960 | -0.4893 | -0.8766 | -0.6252 | -0.368  | -0.2142 | -0.2924 | -0.291  |

|            |         |         |         |         |         |         |         |
|------------|---------|---------|---------|---------|---------|---------|---------|
| PKH_110370 | 0.12297 | -0.0964 | -0.2126 | -0.2765 | -0.043  | -0.2893 | -0.6728 |
| PKH_126280 | 0.81659 | 0.73081 | 0.89038 | 0.75186 | 0.33799 | 0.23262 | 0.08133 |
| PKH_141940 | 0.21779 | 0.18845 | 0.2375  | 0.19886 | 0.08667 | 0.28298 | 0.4752  |
| PKH_082150 | -0.6903 | -0.6552 | -0.8527 | -1.0592 | -0.8112 | -0.8475 | -1.1577 |
| PKH_052120 | -1.4177 | -1.1525 | -1.3961 | -1.0627 | -1.0709 | -1.1736 | -2.6989 |
| PKH_131330 | 1.57343 | 1.33838 | 1.09933 | 0.80674 | 0.48112 | 0.38313 | 0.89894 |
| PKH_143370 | -0.0742 | -0.3218 | -0.1322 | -0.2932 | 0.05907 | 0.10309 | 0.24493 |
| PKH_031810 | -1.0595 | -1.4375 | -1.5863 | -1.7424 | -1.5805 | -1.444  | -1.1768 |
| PKH_130580 | -0.1063 | 0.55654 | 0.80015 | 1.16266 | 0.82522 | 0.55275 | 0.22171 |
| PKH_020410 | -1.9461 | -1.78   | -1.7629 | -1.9472 | -1.9134 | -2.0271 | -2.4899 |
| PKH_030780 | -1.7171 | -1.7682 | -1.6974 | -1.6016 | -1.5842 | -1.6359 | -3.4032 |
| PKH_082830 | -0.9698 | -0.9417 | -1.0972 | -0.7404 | -0.6886 | -0.9758 | -1.4375 |
| PKH_071040 | -0.4014 | -0.1306 | -1.0095 | -0.1793 | -0.3257 | -0.257  | -1.2392 |
| PKH_051010 | -1.3351 | -1.1795 | -1.0077 | -0.8469 | -0.4047 | -0.3073 | -0.891  |
| PKH_146140 | 0.32506 | 0.10009 | 0.05048 | -0.3195 | -0.0775 | -0.1138 | 0.1512  |
| PKH_061440 | 0.55588 | 0.54412 | 0.59973 | 0.46615 | 0.49882 | 0.44656 | 0.34578 |
| PKH_060110 | -0.1271 | 0.08417 | 0.05967 | -0.0501 | -0.0682 | -0.1922 | -0.3809 |
| PKH_111920 | -0.6237 | -0.7061 | -0.5467 | -0.9713 | -0.7759 | -0.6643 | -0.5906 |
| PKH_080600 | -0.2943 | -0.3769 | -0.3367 | -0.1295 | 0.3479  | 0.51861 | 0.66702 |
| PKH_101140 | -0.3786 | -0.2894 | -0.2495 | -0.3755 | -0.3228 | -0.3352 | -0.425  |
| PKH_143400 | 0.32961 | 0.07918 | 0.11345 | -0.216  | -0.1493 | -0.184  | 0.16981 |
| PKH_040970 | 0.55418 | 0.69304 | 0.82244 | 0.64544 | 0.33859 | 0.58714 | 0.20543 |
| PKH_113140 | 0.05841 | -0.0073 | 0.10622 | 0.23348 | 0.27928 | 0.69378 | 0.7817  |
| PKH_110960 | 0.45553 | 0.62334 | 0.63685 | 0.62498 | 0.59079 | 0.38113 | 0.21457 |
| PKH_052560 | 0.20447 | 0.11955 | 0.20591 | 0.11868 | -0.1872 | -0.2036 | -0.2679 |
| PKH_142790 | 0.60699 | 0.52922 | 0.39892 | 0.23857 | 0.03559 | -0.2339 | -1.2353 |
| PKH_040320 | -0.8991 | -0.9009 | -0.2853 | -0.0507 | 0.3617  | 0.43015 | 0.15128 |
| PKH_040250 | -0.1398 | -0.2115 | -0.2969 | -0.34   | -0.3539 | -0.6455 | -0.7694 |
| PKH_062290 | -0.9738 | -0.8507 | -1.0966 | -0.5787 | -0.3991 | -0.3566 | -0.5319 |
| PKH_073000 | -0.3334 | -0.407  | -0.4155 | -0.5925 | -0.5297 | -0.431  | -0.4264 |
| PKH_124480 | -0.4433 | -0.4619 | -0.4871 | -0.6463 | -0.7263 | -0.4358 | -0.0505 |
| PKH_112700 | 0.13243 | 0       | -0.0196 | 0.00993 | -0.0568 | 0.05519 | 0.26427 |
| PKH_040670 | 0.23775 | 0.19015 | 0.11142 | 0.19016 | 0.22826 | 0.20179 | 0.4131  |
| PKH_070680 | -0.5974 | -0.6894 | -0.7551 | -1.0039 | -0.8473 | -0.8857 | -0.5093 |
| PKH_050030 | -0.0896 | -0.4841 | -0.3277 | -0.1115 | -0.2619 | -0.2368 | -1.572  |
| PKH_031500 | -1.3659 | -1.4621 | -1.4147 | -1.3407 | -1.2513 | -1.3875 | -1.7675 |
| PKH_052680 | -0.0772 | -0.1755 | 0.03574 | -0.0336 | 0.44793 | 0.16018 | 0.40565 |
| PKH_141700 | 0.28014 | 0.25888 | 0.29735 | 0.11258 | -0.2186 | -0.2567 | 0.00524 |
| PKH_134480 | 0.11396 | 0.4156  | 0.31542 | 0.4879  | 0.59853 | 0.62742 | 0.66778 |
| PKH_123370 | -0.1967 | -0.1765 | -0.0084 | -0.2158 | -0.0474 | -0.0894 | 0.09672 |
| PKH_143960 | -0.1217 | -0.372  | 0.10511 | 0.28928 | 0.52723 | 0.76697 | 0.85755 |
| PKH_041010 | -0.7127 | -0.7256 | -0.6289 | -0.7188 | -0.6067 | -0.4615 | -0.3312 |
| PKH_131600 | -0.2308 | -0.1758 | 0.42191 | 0.62588 | 0.55262 | 0.5817  | 0.26532 |
| PKH_083050 | 0.46481 | 0.56651 | 0.43262 | 0.36941 | 0.44834 | 0.33336 | 0.50414 |
| PKH_121360 | -0.454  | -0.1641 | -0.9051 | -0.2848 | -0.6875 | -0.1193 | -1.213  |
| PKH_140180 | 0.8904  | 0.98451 | 1.03125 | 1.1861  | 0.75834 | 0.67615 | 0.67557 |
| PKH_126390 | -0.4617 | -0.1637 | -0.2    | 0.04504 | 0.126   | 0.04154 | -0.2145 |
| PKH_111690 | 0.57554 | 0.31123 | 0.31189 | 0.20297 | -0.0343 | 0.24213 | 0.64022 |
| PKH_126370 | 0.08765 | 0.22859 | 0.37703 | 0.07884 | 0.11378 | 0.17153 | -0.1469 |
| PKH_031440 | -0.2813 | 0.04905 | -0.0765 | -0.0328 | -0.1101 | -0.1803 | -0.7853 |
| PKH_050630 | -0.6431 | -0.3683 | 0.0885  | 0.27517 | 0.33994 | 0.30208 | -0.0387 |
| PKH_114480 | -0.216  | -0.1185 | -0.0061 | -0.0722 | -0.3444 | -0.1791 | 0.23294 |
| PKH_132360 | 0.077   | -0.0774 | -0.178  | -0.0503 | 0.05937 | -0.0796 | -0.0501 |
| PKH_110810 | 0.24434 | 0.28497 | 0.11204 | 0.03769 | -0.0044 | -0.2978 | -0.432  |
| PKH_131380 | 0.90617 | 0.78926 | 0.92704 | 0.73803 | 0.89525 | 0.69779 | 0.84725 |
| PKH_100960 | -1.6225 | -2.329  | -1.299  | -1.1608 | -0.6842 | -0.2341 | -0.0355 |
| PKH_081740 | 1.26627 | 1.32478 | 1.22661 | 1.14658 | 0.82046 | 0.7889  | 1.1484  |
| PKH_072000 | -0.2261 | -0.2534 | -0.1791 | -0.1706 | -0.2235 | -0.3057 | -0.4812 |
| PKH_060500 | -0.8341 | -0.6499 | -0.4932 | -0.4572 | -0.4042 | -0.423  | -0.668  |
| PKH_011000 | -1.0376 | -1.1719 | -1.4052 | -1.5278 | -1.1092 | -0.408  | -0.8219 |
| PKH_143360 | -0.3084 | -0.3803 | -0.4082 | -0.4179 | -0.6456 | -0.4557 | -0.0952 |
| PKH_134520 | -0.0032 | -0.0217 | 0.02029 | 0.04692 | 0.16208 | 0.59588 | 0.27176 |
| PKH_122500 | 0.22001 | 0.38855 | 0.2805  | 0.81718 | 0.92249 | 1.09806 | 0.71237 |

|            |         |         |         |         |         |         |         |
|------------|---------|---------|---------|---------|---------|---------|---------|
| PKH_070870 | 0.23414 | 0.19586 | 0.26674 | -0.0124 | 0.15319 | 0.16671 | 0.08069 |
| PKH_040530 | -0.695  | -0.6635 | -0.4904 | -1.2242 | -0.7473 | -0.0066 | 0.20496 |
| PKH_146150 | -0.0771 | -0.2363 | -0.0536 | -0.3988 | -0.3663 | -0.3369 | 0.00071 |
| PKH_145550 | 0.4168  | 0.60221 | 0.90758 | 1.17356 | 0.71923 | 0.69689 | 0.9073  |
| PKH_031550 | -0.4653 | -0.3864 | -0.2576 | -0.204  | -0.463  | -0.4941 | -1.8952 |
| PKH_083290 | -0.4084 | -0.4322 | -0.7839 | -1.2034 | -1.1832 | -1.3726 | -0.9498 |
| PKH_140670 | 0.4183  | 0.33039 | 0.34926 | 0.23874 | 0.40164 | 0.26911 | 0.42224 |
| PKH_052570 | 0.00413 | -0.5286 | -0.8482 | -1.0045 | -1.1275 | -0.4638 | 0.27949 |
| PKH_000380 | 0.10391 | 0.02553 | 0.14045 | 0.1356  | 0.23497 | 0.49384 | 0.38103 |
| PKH_072130 | 0.46143 | 0.52823 | 0.41961 | 0.0995  | 0.0322  | -0.0573 | -0.1709 |
| PKH_071780 | -0.6715 | -0.5455 | -0.7589 | -0.5108 | -0.6102 | -0.4892 | -2.1868 |
| PKH_070750 | -0.4643 | -0.2959 | -0.3175 | -0.1272 | -0.2769 | -0.4581 | -0.1817 |
| PKH_145480 | -0.0187 | 0.15226 | 0.02214 | 0.13607 | 0.20736 | 0.0961  | -1.1989 |
| PKH_060060 | -0.8724 | -1.6198 | -1.8473 | -2.6146 | -1.7494 | -0.5574 | 0.55824 |
| PKH_021040 | -0.8517 | -0.6208 | -0.7615 | -0.7335 | -0.6342 | -0.7978 | -1.8371 |
| PKH_011040 | -0.9211 | -0.7271 | -1.034  | -0.8971 | -0.3551 | -0.3213 | -0.86   |
| PKH_102160 | -0.1994 | -0.4182 | -0.4661 | -1.3435 | -0.5722 | -0.51   | -0.6083 |
| PKH_061570 | -1.2214 | -1.2858 | -1.2194 | -0.7762 | -0.2133 | 0.1338  | -0.0241 |
| PKH_125220 | -0.1116 | -0.2062 | -0.2011 | 0.34807 | 0.53924 | 0.61323 | 0.54105 |
| PKH_122260 | -0.4556 | -0.2578 | -0.1947 | -0.157  | -0.2706 | -0.4206 | -0.3068 |
| PKH_031930 | -0.436  | -0.5866 | -0.7135 | -0.8193 | -0.6959 | -0.7322 | -0.3665 |
| PKH_081520 | 0.05047 | -0.0389 | -0.2937 | -0.4636 | -0.7248 | -0.3734 | -0.1627 |
| PKH_144100 | 0.64084 | 0.44125 | 0.53979 | 0.21828 | -0.103  | -0.1788 | 0.56142 |
| PKH_131310 | 0.33883 | -0.2964 | -0.1604 | 0.4452  | 1.06968 | 1.18286 | 1.40058 |
| PKH_101770 | -0.2048 | -0.1776 | -0.1119 | -0.2754 | -0.3638 | -0.2483 | -0.3485 |
| PKH_143100 | 0.80006 | 0.91696 | 0.68822 | 0.59809 | 0.40062 | 0.40303 | 0.94567 |
| PKH_145740 | 0.42586 | 0.46379 | 0.50346 | 0.41372 | 0.36536 | 0.42409 | 0.63244 |
| PKH_090570 | -0.3432 | -0.2796 | 0.08081 | -0.069  | -0.1889 | -0.1509 | -0.0544 |
| PKH_030560 | 0.00546 | 0.12988 | 0.17574 | 0.02994 | -0.0881 | 0.00883 | 0.08877 |
| PKH_120440 | -1.2195 | -1.2042 | -0.6122 | -0.5753 | -0.6171 | -0.4519 | -1.0552 |
| PKH_114700 | -0.9916 | -1.0587 | -1.0332 | -0.9977 | -1.0931 | -0.9306 | -0.7863 |
| PKH_070850 | -0.0351 | -0.4291 | -0.35   | -0.2607 | 0.52784 | 1.12927 | 1.50201 |
| PKH_000580 | -0.6399 | -0.468  | -0.7891 | -0.3569 | -1.0264 | -0.467  | -0.9472 |
| PKH_061260 | 0.96182 | 0.96918 | 0.97251 | 0.95838 | 0.40632 | 0.37634 | 1.13226 |
| PKH_020660 | 0.04604 | 0.38569 | 0.55801 | 0.67383 | 0.46596 | 0.23553 | -0.1781 |
| PKH_121210 | 0.75593 | 0.72055 | 0.86572 | 0.90065 | 0.51941 | 0.25997 | 0.13706 |
| PKH_121270 | -0.1471 | -0.1609 | -0.2941 | -0.1145 | -0.1379 | -0.1024 | -0.1836 |
| PKH_145580 | 0.34062 | 0.08163 | 0.10046 | -0.007  | -0.1005 | -0.1108 | 0.2243  |
| PKH_040790 | -0.3184 | -0.573  | -0.6741 | -0.7469 | -0.9433 | -0.675  | -0.4421 |
| PKH_092630 | 0.28583 | 0.7272  | 1.02682 | 0.95848 | 0.71024 | 0.38045 | 0.1673  |
| PKH_020810 | -1.1796 | -1.183  | -0.8197 | -1.1031 | -0.1299 | -0.2075 | -0.4174 |
| PKH_092700 | 0.51828 | 0.39309 | 0.52203 | 0.63307 | 0.6346  | 0.60781 | 0.1946  |
| PKH_120910 | -0.5348 | -0.3391 | -0.267  | -0.0348 | -0.132  | 0.03087 | -0.1125 |
| PKH_052480 | -0.6366 | -1.0666 | -1.3824 | -1.3928 | -0.8069 | 0.29096 | 0.55538 |
| PKH_081990 | -0.3264 | 0.09091 | 0.20006 | 0.48176 | 0.06835 | -0.373  | -0.764  |
| PKH_030430 | 0.85622 | 1.44942 | 1.2315  | 1.28308 | 0.67574 | 0.48909 | -0.1005 |
| PKH_031160 | -0.0498 | -0.1158 | 0.25044 | -0.3883 | 0.66455 | 0.38503 | -0.1287 |
| PKH_131160 | 0.32786 | 0.22509 | 0.42497 | 0.37215 | 0.263   | 0.04416 | -0.3514 |
| PKH_123340 | 0.17976 | 0.16145 | 0.3421  | 0.25184 | 0.36487 | 0.61203 | 0.64212 |
| PKH_132820 | 0.24751 | 0.23989 | 0.34673 | 0.3337  | 0.82781 | 0.76163 | 1.14223 |
| PKH_030700 | -1.1827 | -1.1671 | -0.8296 | -0.6027 | 0.08314 | 0.15601 | -0.4903 |
| PKH_131170 | 0.09904 | 0.09382 | 0.11882 | 0.04616 | 0.03127 | -0.1815 | -0.1812 |
| PKH_125430 | -0.7479 | -1.2578 | -1.2752 | -0.2165 | 0.54877 | 0.95795 | 0.89166 |
| PKH_031490 | 0.16266 | 0.25195 | 0.49922 | 0.41689 | 0.19677 | 0.20785 | 0.04858 |
| PKH_071800 | 0.76108 | 0.51429 | 0.54896 | 0.03454 | -0.3534 | -0.3754 | -0.2852 |
| PKH_071340 | 0.14175 | 0.45247 | 0.61859 | 0.32974 | 0.20395 | 0.0629  | -0.1266 |
| PKH_144120 | -0.6587 | -0.1618 | 0.17576 | 0.6279  | 0.52758 | 0.43755 | -0.0962 |
| PKH_142130 | 0.52894 | 0.41148 | 0.65977 | 0.8444  | 1.08871 | 1.13106 | 1.46455 |
| PKH_111720 | 0.26454 | 0.34185 | 0.52384 | 0.61114 | 0.28633 | 0.31696 | 0.1915  |
| PKH_113490 | -0.5366 | -0.7155 | -0.4211 | -0.0973 | 0.22233 | 0.51331 | 0.39407 |
| PKH_070300 | -0.1145 | -0.2657 | -0.2254 | -0.1372 | -0.3917 | -0.3462 | -0.2621 |
| PKH_080580 | -0.1897 | -0.1416 | -0.1153 | 0.00453 | -0.1978 | -0.0524 | -1.4296 |
| PKH_070180 | 0.89938 | 0.65844 | 0.58072 | 0.68514 | 0.47238 | 0.75566 | 0.95934 |

|            |         |         |         |         |         |         |         |
|------------|---------|---------|---------|---------|---------|---------|---------|
| PKH_030020 | -0.6196 | -0.3706 | 0.20435 | 0.41941 | 0.53866 | 0.68494 | 0.1518  |
| PKH_010770 | 0.76841 | 0.7726  | 0.91599 | 0.42093 | 0.51329 | 0.32398 | 0.1981  |
| PKH_132540 | 0.60118 | 0.23873 | 0.12354 | 0.01377 | -0.1639 | -0.2692 | -0.1606 |
| PKH_102040 | 0.30917 | 0.35337 | -0.2392 | -0.4114 | -0.1968 | -0.3658 | -0.0926 |
| PKH_143920 | -1.2571 | -1.6692 | -1.6013 | -0.9399 | -0.1409 | 0.42808 | 0.55553 |
| PKH_091650 | 0.52313 | 0.48189 | 0.35923 | 0.16182 | -0.0715 | -0.056  | 0.23289 |
| PKH_083330 | 0.15245 | 0.42372 | 0.49505 | 0.71472 | 0.31203 | -0.087  | -0.6733 |
| PKH_143430 | 0.90225 | 0.67833 | 0.58829 | 0.34351 | 0.52152 | 0.70837 | 0.92281 |
| PKH_080130 | 0.61799 | 0.65285 | 0.59185 | 0.58678 | 0.53448 | 0.31061 | 0.21449 |
| PKH_092290 | 0.09915 | 0.14151 | -0.1303 | -0.0092 | -0.2132 | -0.3554 | -1.8862 |
| PKH_093650 | 0.59115 | 0.36254 | 0.12445 | 0.11306 | 0.56261 | 0.86171 | 1.30836 |
| PKH_094490 | 0.41403 | 0.7143  | 0.71306 | 0.70729 | 0.24314 | 0.0736  | 0.1705  |
| PKH_101050 | -0.0562 | -0.105  | -0.1066 | -0.1308 | -0.27   | -0.2024 | -0.2186 |
| PKH_113290 | -0.4107 | -0.3235 | -0.1813 | 0.09414 | 0.34466 | 0.48032 | 0.54017 |
| PKH_100110 | -0.001  | -0.2275 | 0.06831 | 0.77448 | 0.92352 | 1.24044 | 1.48533 |
| PKH_081590 | 0.35004 | 0.23938 | 0.19673 | 0.03183 | -0.1266 | 0.06737 | 0.77132 |
| PKH_080930 | 0.26922 | 0.33026 | 0.60838 | 0.69075 | 0.89722 | 0.73547 | 0.32821 |
| PKH_131950 | 0.10899 | -0.1063 | 0.08543 | 0.20291 | 0.45269 | 0.73728 | 0.96436 |
| PKH_124720 | 1.19124 | 1.52817 | 1.41859 | 1.39787 | 0.87752 | 0.74508 | 1.07833 |
| PKH_120950 | -0.2751 | -0.3917 | -0.2464 | -0.2235 | -0.3259 | -0.2492 | -0.2136 |
| PKH_124930 | 0.14842 | 0.00809 | -0.235  | -0.3922 | -0.4849 | -0.7068 | -0.7238 |
| PKH_112950 | -0.1073 | -0.1977 | -0.1966 | -0.2164 | -0.0717 | -0.0805 | -0.3848 |
| PKH_082990 | 0.62858 | 0.51539 | 0.01077 | -0.0185 | -0.0185 | -0.3332 | -0.5443 |
| PKH_050920 | -0.623  | -0.6331 | -0.6823 | -0.982  | -0.5409 | -0.5036 | -0.7101 |
| PKH_146190 | 0.62232 | 0.64728 | 0.66627 | 0.61742 | 0.79007 | 0.41092 | 0.8288  |
| PKH_072300 | -0.3272 | -0.9639 | -1.6659 | -2.5205 | -2.4332 | -1.6996 | -0.9309 |
| PKH_101870 | -0.7303 | -0.5353 | -0.4136 | -0.6239 | -0.6624 | -0.565  | -0.5111 |
| PKH_121890 | -0.2875 | -0.1959 | -0.1605 | 0.03514 | -0.1222 | -0.021  | -1.3409 |
| PKH_113890 | -0.0416 | 0.04585 | -0.2148 | -0.4333 | -0.5307 | -0.5326 | -0.2118 |
| PKH_061800 | 0.43842 | 0.28574 | 0.18635 | -0.0912 | 0.19473 | 0.14406 | 0.36082 |
| PKH_120390 | -0.1198 | -0.1067 | -0.0476 | 0.05286 | -0.1952 | -0.3808 | -0.7569 |
| PKH_144020 | 0.10807 | 0.01453 | 0.0422  | -0.0201 | -0.0246 | -0.0219 | -0.3949 |
| PKH_140300 | 0.19829 | 0.3359  | 0.11911 | 0.09533 | -0.1759 | -0.448  | -0.2191 |
| PKH_102430 | -0.0891 | 0.34161 | -0.1981 | 0.01132 | -0.0412 | -0.0093 | -0.3831 |
| PKH_040800 | 0.59472 | 0.81469 | 0.39153 | 0.32111 | 0.01346 | -0.3739 | -0.8215 |
| PKH_011252 | -2.2161 | -2.1598 | -2.5754 | -2.4225 | -2.0416 | -2.2046 | -3.6244 |
| PKH_040200 | -0.3088 | 0.11151 | -0.2135 | -0.3186 | -0.0843 | -0.2227 | -0.7222 |
| PKH_091200 | -0.1452 | -0.0672 | -0.2003 | 0.12008 | 0.35051 | 0.45691 | 0.21143 |
| PKH_081640 | -0.4724 | -0.5987 | -0.4926 | -0.7128 | -0.463  | -0.3469 | -0.1689 |
| PKH_020520 | 0.41991 | 0.66952 | 0.60217 | 0.47399 | 0.23485 | -0.129  | 0.1213  |
| PKH_082590 | -0.2821 | -0.2042 | 0.12451 | 0.05025 | -0.0621 | 0.12938 | -0.0562 |
| PKH_091910 | 0.31947 | 0.41844 | 0.21034 | 0.3088  | 0.22643 | -0.1754 | -0.4494 |
| PKH_030530 | -0.1083 | -0.1233 | -0.6343 | -0.3729 | -0.2747 | -0.3642 | -1.719  |
| PKH_122610 | 0.02368 | -0.0247 | -0.1246 | 0.0924  | -0.0687 | -0.1197 | 0.16193 |
| PKH_083590 | 0.22567 | 0.20536 | -0.0123 | 0.0194  | 0.17    | -0.0856 | -0.1376 |
| PKH_143460 | 0.61493 | 0.57062 | 0.52557 | 0.29008 | 0.32328 | 0.50585 | 0.7035  |
| PKH_143680 | -0.1317 | -0.2437 | 0.10183 | 0.1814  | 0.16805 | -0.0044 | -1.2233 |
| PKH_093590 | 0.53457 | 0.60684 | 0.65126 | 0.7432  | 0.24295 | 0.14547 | 0.26586 |
| PKH_103010 | 0.43453 | 0.04685 | -0.0478 | 0.08807 | 0.64543 | 1.00292 | 1.04624 |
| PKH_143860 | 0.50097 | 0.35703 | 0.18554 | 0.20809 | 0.19949 | 0.18915 | 0.35093 |
| PKH_020780 | -0.5432 | -0.4689 | -0.4908 | -0.3934 | -0.5061 | -0.4919 | -0.8604 |
| PKH_111260 | -0.2864 | -0.0907 | -0.2837 | -0.3194 | 0.07807 | -0.1082 | 0.05744 |
| PKH_141660 | 0.99223 | 1.07078 | 1.09755 | 1.16925 | 0.53876 | 0.27491 | 0.1589  |
| PKH_092470 | -0.0717 | -0.2338 | -0.4304 | -0.4765 | -0.5108 | 0.18658 | 0.52726 |
| PKH_102580 | 0.07432 | 0.0146  | 0.05758 | -0.203  | -0.0642 | -0.0362 | 0.04656 |
| PKH_130300 | 0.21186 | 0.29175 | 0.49874 | 0.37468 | 0.3114  | 0.31411 | 0.21073 |
| PKH_134060 | 0.77032 | 0.55169 | 0.66829 | 0.62859 | 0.67908 | 0.5693  | 0.8552  |
| PKH_124600 | 0.46004 | 0.18403 | -0.1086 | -0.1272 | -0.1711 | 0.27983 | 0.83888 |
| PKH_114660 | 0.26456 | 0.30258 | 0.42643 | 0.43052 | 0.17365 | -0.0056 | 0.13263 |
| PKH_133870 | 0.13987 | 0.03405 | 0.14161 | 0.31967 | 0.35675 | 0.39631 | 0.3018  |
| PKH_124070 | -0.291  | -0.3276 | -0.4466 | -0.6287 | -0.7393 | -0.6224 | -0.666  |
| PKH_121940 | 0.35892 | 0.26583 | 0.31465 | 0.04203 | 0.08296 | -0.1288 | -0.1745 |
| PKH_131500 | 0.62401 | 0.68608 | 0.69976 | 0.5249  | 0.35735 | 0.17548 | 0.2133  |

|            |         |         |         |         |         |         |         |
|------------|---------|---------|---------|---------|---------|---------|---------|
| PKH_112830 | -1.1292 | -0.6605 | -0.4523 | -0.7329 | -0.2409 | 0.05474 | 0.15002 |
| PKH_113860 | 0.95179 | 0.88819 | 0.67099 | 0.41949 | 0.49791 | 0.21949 | 0.01547 |
| PKH_126210 | 0.04774 | 0.02507 | 0.07344 | 0.01499 | 0.11644 | 0.17084 | 0.19567 |
| PKH_030250 | -0.1334 | -0.0413 | -0.09   | -0.3415 | -0.289  | -0.3013 | -0.7394 |
| PKH_134040 | 0.7498  | 0.78858 | 0.68633 | 0.46696 | 0.73968 | 0.59623 | 0.54709 |
| PKH_081530 | -0.2086 | -0.5542 | -0.7907 | -1.0165 | -1.2024 | -0.7161 | -0.1228 |
| PKH_102700 | 0.44774 | 0.47928 | 0.46273 | 0.41807 | 0.23502 | 0.34686 | 0.07117 |
| PKH_123960 | 0.18698 | -0.0886 | -0.0547 | -0.0731 | 0.0093  | 0.04437 | 0.07786 |
| PKH_111310 | 1.01744 | 0.83925 | 0.54928 | 0.3035  | 0.13714 | 0.11812 | 0.46798 |
| PKH_114040 | 0.43015 | 0.37366 | 0.01127 | -0.3805 | -0.8628 | -1.1558 | -1.0934 |
| PKH_041620 | -0.1318 | -0.1248 | -0.2489 | -0.1778 | -0.1008 | -0.0986 | -0.5556 |
| PKH_083630 | 0.00335 | 0.23438 | 0.00388 | 0.0218  | 0.11482 | -0.077  | -0.171  |
| PKH_130900 | 0.27093 | 0.26406 | 0.57587 | 0.59806 | 0.74037 | 0.70429 | 0.35744 |
| PKH_020560 | -1.2347 | -0.6852 | -0.7602 | -1.1718 | -0.5044 | -0.8746 | -1.2766 |
| PKH_142310 | 0.65004 | 0.48257 | 0.53716 | 0.57303 | 0.63822 | 0.36817 | 0.37937 |
| PKH_081580 | -0.3072 | 0.21896 | 0.71544 | 0.5782  | 0.65005 | 0.38569 | -0.1891 |
| PKH_062180 | -0.1338 | -0.3058 | -0.0769 | -0.0185 | 0.00103 | 0.0664  | 0.32042 |
| PKH_143220 | 0.78313 | 1.1742  | 1.21687 | 1.20231 | 0.91593 | 0.70182 | 0.71963 |
| PKH_051670 | -0.0714 | -0.2128 | -0.2553 | -0.4831 | 0.06122 | 0.23342 | -0.7346 |
| PKH_122030 | -0.5504 | -0.0151 | -0.2348 | -0.3859 | -0.3279 | -0.434  | -0.6669 |
| PKH_020270 | -0.8255 | -1.2862 | -1.0541 | -0.9384 | -1.0169 | -0.9383 | -0.3963 |
| PKH_145990 | 0.38666 | 0.31867 | 0.28356 | 0.21109 | 0.38301 | 0.34236 | 0.51504 |
| PKH_145540 | 0.60223 | 0.18756 | 0.42187 | 1.00516 | 1.80088 | 1.90435 | 1.90768 |
| PKH_144760 | -0.2896 | -0.7148 | -0.4296 | -0.6362 | -0.3497 | -0.2382 | -0.1032 |
| PKH_093950 | -0.9447 | -1.0963 | -1.1556 | -1.2012 | -0.9056 | -0.6709 | -1.037  |
| PKH_041280 | 0.37451 | 0.42504 | 0.41499 | 0.22661 | -0.0171 | -0.1229 | -0.2408 |
| PKH_145650 | -0.4863 | -0.2955 | -0.2112 | -0.4053 | -0.5601 | -0.7368 | -0.574  |
| PKH_092360 | -0.1241 | -0.0016 | -0.1456 | -0.1964 | -0.2635 | -0.2086 | -0.8472 |
| PKH_061990 | -0.067  | -0.1974 | 0.01443 | -0.1956 | -0.2874 | -0.2414 | -0.3369 |
| PKH_093330 | 0.48624 | 0.59021 | 0.45973 | 0.22031 | 0.24323 | 0.20218 | 0.37699 |
| PKH_122230 | 0.78927 | 0.82903 | 1.11989 | 1.3558  | 1.24615 | 0.76448 | 0.69718 |
| PKH_061670 | 0.47066 | 0.78054 | 0.94805 | 0.9626  | 0.57795 | 0.36622 | 0.22198 |
| PKH_090190 | -0.4136 | -0.2967 | -0.4367 | -0.5296 | -0.6518 | -0.7479 | -0.5863 |
| PKH_091290 | -0.3117 | -0.1814 | -0.3306 | -0.4447 | -0.3418 | -0.6423 | -0.7847 |
| PKH_083660 | 0.62124 | 0.62862 | 0.65422 | 0.80122 | 0.83206 | 0.30369 | 0.06491 |
| PKH_142820 | 0.18468 | 0.17553 | -0.1188 | -0.3754 | 0.05473 | -0.1863 | -0.6884 |
| PKH_091660 | 1.09359 | 1.11834 | 1.0847  | 0.99353 | 0.60038 | 0.63728 | 1.08146 |
| PKH_041000 | 0.93733 | 1.08988 | 0.91378 | 0.66261 | 0.51244 | 0.56086 | 0.95001 |
| PKH_145470 | -0.9453 | -1.0352 | -0.9879 | -1.6161 | -0.9645 | -0.6107 | -0.3158 |
| PKH_021060 | -0.8162 | -0.4129 | -0.3858 | -0.6155 | -0.6056 | -0.9013 | -1.4611 |
| PKH_050560 | 0.07224 | 0.13567 | -0.1527 | -0.0424 | -0.2278 | -0.2489 | -0.3298 |
| PKH_120480 | 0.683   | 0.72474 | 0.80817 | 0.93487 | 0.39339 | 0.48352 | 0.54196 |
| PKH_083090 | -0.1032 | -0.2019 | 0.314   | 0.76292 | 0.69857 | 0.41205 | -0.2759 |
| PKH_112730 | -0.0208 | -0.0672 | -0.1957 | -0.1623 | -0.131  | -0.1398 | 0.23541 |
| PKH_060420 | -0.6892 | -0.5168 | -0.4996 | -0.6546 | -0.6965 | -0.8886 | -1.0629 |
| PKH_125290 | -0.0252 | -0.1148 | -0.2373 | -0.4081 | -0.3803 | -0.388  | -0.8211 |
| PKH_100280 | 0.39727 | 0.19556 | 0.28868 | 0.24855 | 0.23363 | 0.12166 | -0.0817 |
| PKH_010490 | 0.27531 | -0.1175 | 0.11218 | -0.27   | 0.21597 | 0.15471 | 0.13649 |
| PKH_145510 | 0.25239 | 0.25383 | 0.12658 | 0.12995 | 0.18202 | 0.22844 | 0.40965 |
| PKH_070080 | -0.3838 | -0.8735 | -0.377  | 0.13927 | 0.57019 | 0.62603 | 0.76706 |
| PKH_124900 | 0.52836 | 0.59912 | 0.48404 | 0.6978  | 0.6926  | 0.33335 | 0.72588 |
| PKH_126180 | -1.0464 | -1.2351 | -0.8088 | 0.04765 | 0.46899 | 0.77255 | 0.37273 |
| PKH_132840 | 0.14426 | 0.15267 | 0.05618 | -0.1047 | -0.2395 | -0.3614 | -0.3312 |
| PKH_040170 | -1.2016 | -1.3201 | -1.433  | -1.6399 | -1.2922 | -1.4604 | -1.3352 |
| PKH_030450 | -0.3811 | -0.4281 | -0.2825 | -0.1127 | -0.1127 | -0.2727 | -0.3367 |
| PKH_102200 | 0.03011 | 0.13013 | 0.13954 | 0.00872 | -0.1589 | -0.2511 | -0.1721 |
| PKH_112220 | 0.58161 | 0.43894 | 0.47948 | 0.2058  | 0.69264 | 0.80392 | 0.83999 |
| PKH_142160 | -0.2735 | -0.5353 | -0.6238 | -0.4413 | -0.3618 | -0.0899 | 0.17407 |
| PKH_124250 | -0.3367 | -0.4139 | -0.4588 | -0.1191 | 0.01126 | -0.2912 | -0.5263 |
| PKH_092600 | 0.02229 | 0.10416 | 0.3449  | 0.49297 | -0.1388 | -0.1954 | -0.1697 |
| PKH_126790 | 0.11904 | 0.08243 | -0.0538 | -0.1034 | -0.258  | -0.4321 | -0.8266 |
| PKH_141370 | 0.8311  | 1.08371 | 0.82723 | 0.70075 | 0.35419 | 0.15311 | -0.0415 |
| PKH_100410 | 0.05629 | -0.1487 | -0.1194 | 0.19802 | 0.12306 | 0.09396 | -1.0133 |

|            |         |         |         |         |         |         |         |
|------------|---------|---------|---------|---------|---------|---------|---------|
| PKH_040710 | -0.3471 | -0.7476 | -0.911  | -0.6255 | -0.4297 | -0.2828 | -0.2081 |
| PKH_080610 | 0.51407 | 0.8658  | 0.9573  | 0.99721 | 0.76089 | 0.69864 | 0.7616  |
| PKH_122510 | 1.02573 | 0.7879  | 0.80466 | 0.64946 | 0.66888 | 0.50433 | 0.53031 |
| PKH_050440 | -0.0758 | 0.34428 | 0.89394 | 0.97587 | 0.54735 | 0.38515 | -0.0898 |
| PKH_140290 | -0.729  | -0.5189 | -0.5683 | -0.7215 | -0.6672 | -0.5558 | -0.4729 |
| PKH_130540 | -0.5966 | -0.9089 | -0.8266 | -0.3371 | 0.43338 | 0.66955 | 0.56028 |
| PKH_126320 | -0.0144 | 0.25509 | 0.39566 | 0.57644 | 0.6192  | 0.60383 | 0.12493 |
| PKH_120220 | -0.149  | -0.4188 | -0.9395 | -1.4024 | -1.3426 | -0.5852 | 0.10654 |
| PKH_040590 | 0.66248 | 0.87243 | 0.54015 | 0.54897 | 0.26614 | 0.23856 | -0.089  |
| PKH_081110 | 0.43034 | 0.73141 | 0.79079 | 0.64581 | 0.08872 | -0.2846 | -0.4897 |
| PKH_051770 | 0.05735 | 0.29496 | 0.40882 | 0.40393 | 0.40454 | 0.46299 | 0.25819 |
| PKH_010270 | -0.1065 | -0.399  | -0.7016 | -1.7571 | -1.3936 | -1.0387 | -0.8555 |
| PKH_073110 | 0.04462 | 0.38001 | 0.65546 | 0.68212 | 0.38282 | 0.63638 | 0.50414 |
| PKH_122880 | -0.0801 | -0.0582 | 0.0159  | 0.08784 | -0.1825 | 0.16699 | -1.3155 |
| PKH_123670 | -1.018  | -1.2002 | -1.4891 | -1.8304 | -1.8591 | -1.4769 | -1.3726 |
| PKH_120060 | 0.35196 | -0.113  | -0.4854 | -0.8685 | -0.4091 | 0.43746 | 0.89282 |
| PKH_125370 | -0.7943 | -0.8975 | -0.6897 | -0.765  | -0.5016 | -0.3254 | -0.536  |
| PKH_141960 | -0.2584 | -0.0941 | 0.04176 | -0.1213 | -0.1909 | 0.14866 | 0.40753 |
| PKH_141220 | -0.5944 | -0.4441 | -0.3854 | -0.4747 | -0.2463 | -0.1702 | -0.335  |
| PKH_093530 | 0.54882 | 1.04081 | 1.00943 | 1.35403 | 0.94829 | 0.76914 | 0.34581 |
| PKH_094360 | -0.0289 | -0.1742 | 0.05924 | 0.04571 | 0.1479  | 0.1309  | 0.25527 |
| PKH_120090 | 0.74189 | 0.31489 | 0.03132 | -0.2809 | 0.31155 | 0.82433 | 0.99847 |
| PKH_111760 | 0.02014 | 0.28245 | 0.41212 | 0.52205 | 0.26427 | 0.14892 | -1.3868 |
| PKH_083720 | -0.9145 | -0.8719 | -0.7233 | -0.6216 | -0.657  | -0.5927 | -0.9096 |
| PKH_030340 | -0.0446 | -0.0884 | -0.3089 | -0.8013 | -0.8416 | -0.8574 | -1.2847 |
| PKH_141280 | -0.054  | 0.10283 | 0.15435 | 0.15169 | 0.06826 | 0.10732 | -0.0352 |
| PKH_073400 | 0.15549 | 0.57133 | 1.02313 | 1.08834 | 0.97182 | 0.8775  | 0.94386 |
| PKH_083400 | 0.51476 | 0.40076 | 0.35696 | 0.51324 | 0.50163 | 0.70427 | 0.52519 |
| PKH_081100 | 0.52508 | 0.41119 | 0.51957 | 0.61325 | 0.60291 | 0.68115 | 1.00377 |
| PKH_050940 | 0.20085 | 0.31624 | 0.21895 | 0.3266  | 0.04708 | -0.0128 | 0.02625 |
| PKH_030270 | -0.3028 | 0.03186 | -0.2432 | 0.2726  | -0.3453 | -0.2444 | -0.6225 |
| PKH_041100 | -1.0989 | -0.8905 | -0.9749 | -1.262  | -1.0611 | -1.2741 | -1.5371 |
| PKH_080450 | -0.1029 | -0.482  | -0.044  | -0.0692 | -0.0369 | 0.06215 | 0.23407 |
| PKH_031680 | -0.0928 | -0.1061 | -0.1216 | -0.0305 | -0.0701 | -0.0614 | -1.5338 |
| PKH_141740 | 0.03181 | 0.23568 | 0.45    | 0.35367 | 0.24336 | -0.1261 | -1.3562 |
| PKH_121330 | -0.4283 | -0.2571 | -0.5501 | -0.2519 | -0.9095 | -0.7775 | -1.0522 |
| PKH_131750 | 0.67382 | 0.27031 | -0.057  | -0.1923 | -0.4209 | -0.0717 | 0.84108 |
| PKH_073020 | 0.10322 | 0.03719 | 0.05444 | 0.04844 | 0.01726 | 0.18886 | 0.30424 |
| PKH_122220 | -0.7324 | -0.3485 | -0.433  | -0.0988 | 0.07815 | 0.02677 | -0.2192 |
| PKH_126240 | 0.08751 | 0.17885 | 0.13717 | 0.08814 | 0.06301 | -0.118  | 0.12456 |
| PKH_031100 | -0.0352 | 0.24809 | -0.021  | -0.0357 | -0.2677 | -0.7805 | -1.1311 |
| PKH_051730 | -0.2186 | 0.15754 | 0.28194 | 0.54429 | 0.48358 | 0.27645 | -0.1796 |
| PKH_071880 | 0.4525  | 0.24337 | 0.08145 | 0.1827  | 0.09639 | 0.06554 | 0.10598 |
| PKH_020850 | -1.5821 | -1.4129 | -1.5462 | -1.2261 | -1.5072 | -1.5102 | -2.8566 |
| PKH_091490 | 0.39276 | 0.45393 | 0.42343 | 0.54413 | 0.43889 | 0.29075 | 0.26743 |
| PKH_126260 | -0.1915 | -0.0834 | -0.0982 | -0.0115 | -0.1226 | 0.06059 | 0.18251 |
| PKH_090790 | -0.0864 | 0.00136 | -0.0315 | 0.00671 | 0.07074 | -0.0487 | -0.1777 |
| PKH_110690 | 0.60828 | 0.87197 | 1.10934 | 0.73953 | 0.63245 | 0.73524 | 0.44277 |
| PKH_091550 | -0.7381 | -0.5976 | -0.3786 | -0.2054 | -0.0328 | -0.2841 | -0.0322 |
| PKH_111910 | -0.2079 | -0.1864 | -0.0605 | -0.1726 | -0.1604 | 0.00683 | -0.3079 |
| PKH_072090 | 0.65785 | 1.01121 | 1.30136 | 1.33103 | 0.99744 | 0.62227 | 0.27873 |
| PKH_011560 | -1.0888 | -1.2253 | -1.0537 | -1.211  | -0.6299 | -0.4917 | -0.9023 |
| PKH_145780 | -0.3099 | -0.2034 | 0.251   | 0.27343 | 0.55486 | 0.39028 | 0.15035 |
| PKH_072120 | -0.4057 | -0.5196 | -0.5188 | -0.4694 | -0.2768 | -0.1629 | -0.5013 |
| PKH_052630 | -1.3605 | -1.4208 | -1.5159 | -1.365  | -1.3707 | -1.5753 | -1.5487 |
| PKH_081860 | 0.03931 | 0.1889  | -0.0958 | -0.077  | -0.0366 | -0.0257 | -0.3557 |
| PKH_071990 | 0.2686  | 0.39101 | 0.3822  | 0.76198 | 0.61436 | 0.54194 | 0.5375  |
| PKH_040370 | -1.0632 | -1.0639 | -1.0555 | -0.6672 | -0.989  | -1.1573 | -2.2647 |
| PKH_071560 | -0.7641 | -0.716  | -0.8465 | -0.801  | -0.9245 | -0.9543 | -1.3698 |
| PKH_131990 | -0.6964 | -0.792  | -0.7096 | -0.4505 | -0.6364 | -0.5706 | -0.7327 |
| PKH_052430 | -0.5919 | -0.6116 | -0.4132 | -0.2366 | -0.2253 | -0.1692 | -0.4248 |
| PKH_130890 | 0.04812 | -0.3437 | -0.552  | -0.8545 | -0.8907 | -0.565  | -0.2488 |
| PKH_113640 | 0.62766 | 0.73526 | 0.73232 | 1.03091 | 0.91751 | 0.63176 | 0.85977 |

|            |         |         |         |         |         |         |         |
|------------|---------|---------|---------|---------|---------|---------|---------|
| PKH_070310 | 0.15846 | 0.21682 | 0.31489 | 0.1708  | 0.3999  | 0.32251 | 0.16315 |
| PKH_141680 | 0.65473 | 0.84053 | 1.1544  | 1.01703 | 1.15727 | 0.64889 | 0.7818  |
| PKH_061270 | 0.36225 | 0.27865 | -0.0086 | -0.0388 | -0.3391 | -0.24   | 0.22076 |
| PKH_083000 | 0.46121 | 0.12506 | 0.16482 | -0.0761 | -0.0679 | 0.19602 | 0.3023  |
| PKH_146660 | -0.0871 | -0.0542 | 0.05652 | -0.0555 | -0.1992 | -0.0664 | 0.07393 |
| PKH_041110 | 0.33548 | 0.28692 | 0.05343 | -0.0105 | 0.01017 | 0.00921 | -1.2802 |
| PKH_112120 | -1.3489 | -1.3381 | -1.4675 | -0.6334 | -0.2798 | 0.40083 | 0.01529 |
| PKH_126150 | 0.71282 | 0.6041  | -0.0304 | -0.4275 | -0.5555 | -0.5655 | -0.3111 |
| PKH_030650 | 0.20683 | -0.0848 | -0.026  | -0.2453 | 0.17881 | 0.20624 | 0.26267 |
| PKH_121110 | 0.39676 | 0.42726 | 0.64373 | 0.69236 | 0.85937 | 0.82757 | 0.47096 |
| PKH_132690 | -0.375  | -0.762  | -0.856  | 0.10168 | 0.64056 | 1.01601 | 1.29237 |
| PKH_093380 | 0.36166 | 0.29652 | 0.53331 | 0.71658 | 0.55253 | 0.70803 | 0.55692 |
| PKH_127060 | 0.91039 | 0.41168 | 0.15788 | -0.1786 | 0.11024 | 0.89711 | 1.30007 |
| PKH_080420 | 0.68367 | 0.71926 | 0.6436  | 0.4016  | 0.45547 | 0.26027 | 0.21139 |
| PKH_000450 | -0.7096 | -0.7644 | -0.73   | -0.3696 | -0.5373 | -0.7062 | -0.4898 |
| PKH_051270 | 0.28872 | 0.10562 | 0.26517 | 0.06439 | 0.20699 | 0.17939 | 0.20387 |
| PKH_125650 | 0.15652 | 0.03012 | 0.13976 | -0.0474 | -0.0782 | 0.16619 | 0.72482 |
| PKH_143150 | 0.15574 | 0.6261  | 0.57792 | 0.37095 | 0.12939 | 0.33872 | -0.2606 |
| PKH_073350 | 0.47157 | 0.62046 | 0.58785 | 0.43888 | 0.19525 | 0.05536 | -0.0112 |
| PKH_090560 | 0.78824 | 0.80773 | 1.02222 | 0.97746 | 0.52917 | 0.20965 | 0.10969 |
| PKH_126030 | 0.01456 | 0.03091 | -0.1688 | 0.04507 | -0.1332 | 0.01599 | -1.2463 |
| PKH_121740 | 0.73114 | 0.7581  | 0.83283 | 0.70833 | 0.57711 | 0.26656 | 0.0401  |
| PKH_132080 | 0.05638 | 0.09234 | 0.15071 | 0.00578 | -0.1224 | 0.23943 | 0.66608 |
| PKH_100190 | -0.6693 | -0.6079 | -0.4836 | -0.6323 | -0.5847 | -0.3997 | -0.2882 |
| PKH_121560 | 0.63058 | 1.08678 | 1.14299 | 0.543   | 0.19246 | 0.28907 | 0.42482 |
| PKH_050860 | -1.0246 | -1.2281 | -1.0713 | -1.017  | -0.3259 | -0.1386 | -0.2485 |
| PKH_103080 | -0.4283 | -0.2327 | -0.2715 | -0.333  | -0.4381 | -0.4731 | -0.3881 |
| PKH_100360 | 0.33445 | 0.2208  | 0.3827  | 0.27593 | -0.0655 | 0.07768 | 0.58929 |
| PKH_052660 | 0.16584 | 0.18109 | 0.2566  | 0.00706 | 0.27857 | 0.00816 | -0.0031 |
| PKH_123220 | -1.3498 | -1.1469 | -1.2208 | -0.9771 | -1.0628 | -1.1903 | -1.4772 |
| PKH_062010 | -0.9898 | -0.3656 | 0.24349 | 0.28114 | 0.44138 | 0.10646 | 0       |
| PKH_101480 | -0.1627 | -0.1962 | -0.4286 | 0.14015 | 0.17272 | 0.15822 | -0.9864 |
| PKH_131230 | -0.1862 | -0.3028 | -0.0365 | 0.02483 | 0.11735 | 0.08451 | -0.7118 |
| PKH_121410 | 0.21806 | 0.08518 | 0.20715 | 0.14193 | 0.18506 | 0.12223 | 0.52327 |
| PKH_114320 | -0.3822 | -0.6731 | -0.8191 | -1.0063 | -0.6674 | -0.066  | 0.28319 |
| PKH_113080 | 0.58885 | 0.49187 | 0.37094 | 0.48956 | 0.33998 | 0.37769 | 0.18327 |
| PKH_031560 | -0.6313 | -0.3961 | -0.4306 | -0.4711 | -0.5362 | -0.4272 | -0.521  |
| PKH_020150 | 0.46511 | 0.23016 | 0.02722 | -0.3109 | -0.1135 | -0.3867 | -0.9323 |
| PKH_113150 | -0.6745 | -0.4007 | -0.1738 | 0.08465 | 0.40197 | 0.43863 | 0.42243 |
| PKH_130550 | -0.048  | -0.0315 | -0.0019 | 0.11804 | 0.01758 | 0.05572 | 0.21362 |
| PKH_123850 | 0.27768 | 0.04874 | 0.15655 | 0.14893 | 0.18573 | 0.23406 | 0.28623 |
| PKH_125310 | -0.3708 | -0.5447 | -0.4302 | -0.2805 | -0.3391 | -0.3803 | -0.4358 |
| PKH_061980 | -0.4192 | -0.6389 | -0.544  | -0.4365 | -0.7082 | -0.6943 | -0.5419 |
| PKH_010230 | -1.8763 | -2.0373 | -1.7381 | -1.9359 | -1.0231 | -1.2592 | -1.1439 |
| PKH_121370 | -0.7228 | -0.6179 | -0.6473 | -0.6732 | -0.5199 | -0.4973 | -0.6113 |
| PKH_020110 | 0.61368 | 0.22025 | -0.0031 | -0.4445 | -0.2459 | 0.37037 | 1.22986 |
| PKH_133750 | 0.87286 | 0.67908 | 0.62289 | 0.42052 | 0.45354 | 0.43204 | 0.74896 |
| PKH_124040 | 0.42592 | 0.4479  | 0.51207 | 0.48154 | 0.2139  | 0.18216 | 0.27344 |
| PKH_142750 | -0.2913 | -0.2106 | -0.1085 | -0.3073 | -0.1806 | -0.1926 | 0.03565 |
| PKH_052590 | -0.8556 | -1.0731 | -1.3517 | -1.5523 | -1.5076 | -1.4903 | -1.2101 |
| PKH_100290 | -0.5744 | -0.2368 | -0.1883 | -0.4146 | -0.2788 | 0.08376 | -0.2963 |
| PKH_080690 | 0.86566 | 0.65146 | 0.57494 | 0.40751 | 0.56178 | 0.53313 | 0.6211  |
| PKH_073230 | 0.02105 | 0.40405 | 0.56045 | 0.62534 | 0.48416 | 0.11198 | -0.3438 |
| PKH_060090 | 0.14636 | 0.43033 | 0.52767 | 0.49204 | 0.56287 | 0.4376  | 0.34397 |
| PKH_133770 | 0.14772 | 0.43255 | 0.37553 | 0.6749  | 0.2913  | -0.0317 | -0.1497 |
| PKH_081150 | -0.4744 | -0.5879 | -0.6281 | -0.5596 | -0.7619 | -0.7064 | -0.7768 |
| PKH_126900 | -0.4743 | -0.2488 | -0.152  | -0.4657 | -0.4977 | -0.718  | -0.8159 |
| PKH_132150 | 0.69505 | 0.9267  | 1.50702 | 1.72934 | 1.22638 | 0.96786 | 0.84385 |
| PKH_112710 | 0.56701 | 0.58812 | 0.70453 | 0.44767 | 0.72941 | 0.50142 | 0.49558 |
| PKH_112110 | -0.0649 | -0.4153 | -0.2753 | -0.5092 | -0.2645 | -0.2189 | -0.335  |
| PKH_020580 | -0.6924 | -0.9083 | -1.0515 | -1.1891 | -1.025  | -0.7017 | -1.0301 |
| PKH_123860 | 1.15703 | 1.31918 | 1.4667  | 1.42478 | 1.15003 | 1.10193 | 1.32568 |
| PKH_094320 | 0.01928 | 0.23391 | 0.36009 | 0.58716 | 0.86209 | 0.95059 | 0.74304 |

|            |         |         |         |         |         |         |         |
|------------|---------|---------|---------|---------|---------|---------|---------|
| PKH_052640 | -0.0231 | 0.05583 | -0.0348 | -0.2208 | -0.3901 | -0.6854 | -0.7007 |
| PKH_100400 | 0.16048 | -0.0417 | -0.2137 | -0.5237 | -0.5531 | -0.5151 | -0.0633 |
| PKH_132980 | 0.33923 | 0.291   | 0.14805 | 0.00726 | 0.04961 | -0.0559 | -0.0374 |
| PKH_091760 | 0.59049 | 0.48675 | 0.44281 | 0.74023 | 0.75147 | 0.82368 | 0.72214 |
| PKH_062200 | 0.92863 | 0.86574 | 1.06612 | 0.8372  | 0.5054  | 0.42485 | 0.48455 |
| PKH_071930 | -0.2476 | -0.4274 | -0.4173 | -0.2883 | -0.4898 | -0.4301 | -0.4793 |
| PKH_062150 | -0.0573 | 0.03374 | -0.1257 | -0.1082 | -0.1054 | -0.1357 | -0.3905 |
| PKH_121020 | 0.61393 | 0.76488 | 0.47355 | -0.0583 | 0.12564 | 0.18258 | 0.69178 |
| PKH_101750 | -1.1278 | -1.4442 | -1.3887 | -1.5625 | -1.1439 | -0.8658 | -0.8446 |
| PKH_144180 | 0.40128 | 0.28303 | 0.50817 | 0.10766 | 0.16748 | 0.3608  | 0.53176 |
| PKH_142700 | -0.5506 | -0.7733 | -0.8903 | -0.3697 | -0.181  | 0.36463 | 0.34224 |
| PKH_082550 | 0.09757 | 0.12775 | 0.13979 | -0.0055 | 0.26487 | 0.43049 | 0.47258 |
| PKH_010860 | -0.0516 | -0.1981 | -0.3067 | -0.3641 | -0.3327 | -0.1723 | -0.5185 |
| PKH_081870 | -0.9286 | -0.8932 | -0.8794 | -0.7004 | -0.702  | -0.8686 | -1.6331 |
| PKH_050300 | -0.2912 | 0.15848 | 0.29548 | 0.4149  | 0.52114 | 0.30556 | -0.469  |
| PKH_126020 | 0.61756 | 0.46645 | 0.18196 | -0.0837 | -0.4553 | -0.6346 | -0.5752 |
| PKH_125190 | 0.51066 | 0.80765 | 0.77682 | 0.72335 | 0.28111 | 0.38235 | -1.127  |
| PKH_146300 | 0.2027  | 0.15748 | 0.09842 | 0.06783 | 0.27858 | 0.10933 | 0.12862 |
| PKH_091080 | -0.17   | -0.1109 | -0.074  | 0.08628 | -0.2935 | -0.4549 | -0.7835 |
| PKH_100180 | -0.6507 | -0.2569 | 0.14633 | 0.54756 | 0.53103 | 0.38261 | -0.2505 |
| PKH_101450 | -0.7141 | -0.3903 | 0.69656 | 1.10357 | 1.51994 | 1.1737  | 1.00829 |
| PKH_114230 | 0.54342 | 0.50088 | 0.50366 | 0.47501 | 0.5523  | 0.52545 | 0.49521 |
| PKH_125910 | 0.32566 | 0.70219 | 0.71378 | 0.61072 | 0.60066 | 0.29081 | 0.02356 |
| PKH_092330 | -0.1086 | -0.3356 | -0.5133 | -0.2366 | 0.30453 | 0.77233 | 0.907   |
| PKH_101780 | -0.0286 | -0.4209 | -0.4818 | -0.6732 | -0.7815 | -0.5921 | -0.2948 |
| PKH_011360 | -0.2125 | 0.0009  | 0.05795 | 0.17742 | -0.1859 | -0.3252 | -0.3912 |
| PKH_051910 | -0.5318 | -0.4695 | -0.2341 | -0.4139 | -0.4991 | -0.3969 | -0.4072 |
| PKH_125740 | 1.08651 | 1.33149 | 1.41409 | 1.68613 | 0.90568 | 0.67215 | 0.67548 |
| PKH_132970 | -0.0607 | 0.12152 | 0.11182 | -0.0808 | -0.2387 | -0.2538 | -0.0226 |
| PKH_112610 | -0.0408 | 0.06221 | 0.14665 | -0.0395 | -0.0627 | -0.1636 | -0.4109 |
| PKH_142340 | 0.34018 | 0.47058 | 0.52875 | 0.16838 | -0.2229 | -0.1737 | 0.23951 |
| PKH_121380 | 0.02532 | -0.17   | 0.00142 | 0.3479  | 0.17414 | 0.17034 | -1.2856 |
| PKH_092510 | -0.2635 | -0.1336 | -0.3278 | -0.2814 | -0.2961 | -0.444  | -1.503  |
| PKH_041260 | -0.8111 | -0.8369 | -0.3861 | -0.0754 | -0.0752 | 0.03491 | -0.1611 |
| PKH_090370 | 0.26156 | 0.00163 | 0.01381 | -0.0853 | 0.00134 | -0.0627 | 0.00364 |
| PKH_132420 | 0.66705 | 0.85186 | 0.80621 | 0.53163 | -0.1233 | -0.3101 | 0.23407 |
| PKH_041150 | 1.03301 | 1.1831  | 1.28715 | 1.08606 | 1.00419 | 0.66822 | 0.84167 |
| PKH_125140 | 0.6707  | 0.61729 | 0.55792 | 0.3896  | 0.5559  | 0.5778  | 0.79042 |
| PKH_142480 | 0.31148 | 0.18374 | 0.21222 | 0.06236 | 0.14433 | 0.09356 | -0.0432 |
| PKH_050420 | -0.0979 | 0.03319 | 0.40819 | 0.19257 | 0.63572 | 0.27792 | -0.7146 |
| PKH_092050 | -0.231  | -0.4488 | -0.4715 | -0.6724 | -0.6155 | -0.4165 | 0.00679 |
| PKH_051690 | -0.4031 | -0.4857 | -0.8482 | -0.7977 | -0.8468 | -0.7323 | -0.5502 |
| PKH_072580 | 0.1903  | 0.30396 | 0.13595 | 0.12411 | 0.06233 | 0.28545 | 0.30687 |
| PKH_141640 | 0.11715 | -0.3033 | -0.7294 | -0.8608 | -0.8828 | -0.7784 | -1.0506 |
| PKH_110760 | 0.63911 | 0.53349 | 0.66751 | 0.65779 | 0.44734 | 0.21164 | -0.1065 |
| PKH_073240 | -0.2595 | -0.321  | -0.4846 | -0.3442 | -0.4809 | -0.5702 | -0.5132 |
| PKH_102870 | -0.2213 | -0.2175 | -0.4061 | -0.1882 | -0.4908 | -0.6664 | -1.5546 |
| PKH_090920 | -0.2631 | -0.0868 | -0.0054 | 0.3006  | 0.11533 | 0.40796 | 0.18366 |
| PKH_070070 | 0.71332 | 0.68975 | 0.69    | 0.64733 | 0.62601 | 0.54404 | 0.70357 |
| PKH_080220 | 0.45688 | 0.21804 | 0.10094 | -0.0049 | 0.26146 | 0.18831 | 0.46102 |
| PKH_130515 | 0.31447 | 0.03378 | 0.06781 | -0.1917 | -0.1846 | -0.1956 | 0.22326 |
| PKH_133930 | 0.01018 | 0.11278 | 0.14969 | -0.0251 | 0.01208 | -0.0422 | -1.388  |
| PKH_113420 | -0.9613 | -0.772  | -0.7409 | -0.9891 | -1.0756 | -0.9183 | -0.7189 |
| PKH_041410 | 0.55871 | 0.81813 | 0.72094 | 0.80571 | 0.62251 | 0.40253 | 0.49678 |
| PKH_021240 | -1.0458 | -1.0942 | -1.136  | -1.3357 | -1.1718 | -1.2281 | -1.472  |
| PKH_081260 | 0.30194 | 0.02656 | -0.0766 | -0.1867 | -0.0751 | 0.06893 | 0.2711  |
| PKH_142140 | -0.0096 | -0.2142 | -0.2312 | -0.166  | 0.02366 | 0.01015 | 0.1095  |
| PKH_092230 | 0.32519 | 0.33495 | -0.0213 | -0.17   | -0.3887 | -0.2029 | 0.31134 |
| PKH_101860 | 0.0252  | 0.18068 | 0.04577 | 0.0015  | -0.1976 | -0.3301 | -0.19   |
| PKH_130730 | -0.176  | 0.19282 | 0.6314  | 1.10701 | 1.01362 | 0.76648 | 0.59467 |
| PKH_092170 | -0.055  | -0.0628 | 0.05344 | 0.00802 | -0.1807 | 0.02684 | -1.5188 |
| PKH_112540 | 0.36739 | 0.74552 | 0.76888 | 0.98107 | 0.81084 | 0.34295 | 0.53096 |
| PKH_080520 | 1.20512 | 1.21529 | 0.93955 | 0.57392 | 0.09876 | -0.069  | 0.05545 |



|            |         |         |         |         |         |         |         |
|------------|---------|---------|---------|---------|---------|---------|---------|
| PKH_070800 | -0.2224 | -0.2361 | -0.2362 | 0.11678 | 0.06589 | 0.278   | 0.35901 |
| PKH_133970 | 0.43613 | 0.35286 | 0.60912 | 0.45453 | 0.55164 | 0.70546 | 0.77203 |
| PKH_134100 | 0.91025 | 0.68743 | 0.64508 | 0.28752 | 0.44404 | 0.60749 | 1.07719 |
| PKH_120240 | 0.69746 | 1.05417 | 0.90428 | 0.57313 | 0.15522 | -0.229  | -0.5034 |
| PKH_112970 | -0.2668 | -0.2363 | -0.3089 | -0.3526 | -0.3806 | -0.4783 | -0.8027 |
| PKH_134310 | -0.0484 | -0.0737 | -0.049  | -0.3069 | -0.0823 | -0.0406 | -0.0094 |
| PKH_146290 | 0.10262 | 0.13531 | 0.30184 | -0.003  | -0.0179 | -0.1735 | -0.1389 |
| PKH_101540 | 0.69731 | 0.84079 | 0.92199 | 1.0097  | 0.74974 | 0.74232 | 0.75611 |
| PKH_050570 | 0.22057 | 0.67232 | 0.91013 | 0.53306 | 0.65676 | 0.39052 | -0.0627 |
| PKH_142800 | -0.099  | -0.4854 | -0.6797 | -1.0693 | -0.725  | -0.7465 | -0.5248 |
| PKH_040820 | 0.41799 | 0.79307 | 0.82475 | 1.29322 | 0.94577 | 0.8747  | 0.60588 |
| PKH_120840 | 0.03219 | 0.00324 | 0.02663 | 0.24728 | 0.66792 | 0.57578 | 0.37555 |
| PKH_143900 | 0.51063 | 0.67106 | 0.55674 | 0.35291 | 0.4225  | 0.3855  | 0.45578 |
| PKH_092530 | -0.3079 | -0.4873 | -0.7553 | -0.9638 | -0.4568 | 0.33872 | 0.90038 |
| PKH_010520 | -0.4154 | -0.0687 | 0.27797 | 0.0225  | 0.35302 | 0.11191 | -0.3854 |
| PKH_131100 | 1.09559 | 0.97198 | 1.02865 | 1.1186  | 0.5637  | 0.37545 | 0.47105 |
| PKH_125420 | 0.74302 | 0.85216 | 0.75405 | 0.69351 | 0.52346 | 0.46201 | 0.80198 |
| PKH_031790 | -0.0225 | 0       | -0.196  | -0.4486 | -0.6429 | -0.8421 | -0.9044 |
| PKH_090520 | 0.3684  | 0.49082 | 0.3818  | 0.45255 | 0.40028 | 0.71675 | 0.78047 |
| PKH_031130 | -1.1525 | -1.0471 | -0.7694 | -0.9184 | -0.3973 | -0.5558 | -1.0062 |
| PKH_120210 | 0.54858 | 0.63071 | 0.65752 | 0.63411 | 0.51552 | 0.63444 | 0.45545 |
| PKH_072490 | 0.66985 | 0.82414 | 0.96883 | 0.96803 | 0.61145 | 0.33532 | 0.55356 |
| PKH_111840 | 0.13053 | 0.31192 | 0.04281 | -0.1512 | -0.2545 | -0.1595 | -0.1568 |
| PKH_072070 | -1.5065 | -1.5168 | -0.704  | 0.31955 | -0.1568 | 0.21769 | -0.0948 |
| PKH_145020 | 0.42041 | 0.68383 | 0.36144 | 0.15879 | 0.22366 | 0.29249 | 0.14818 |
| PKH_122490 | 0.00152 | 0.21566 | 0.25229 | 0.53995 | 0.27046 | -0.1539 | -0.0674 |
| PKH_040930 | 0.66878 | 0.53027 | 0.38339 | 0.23267 | 0.45354 | 0.4814  | 0.61756 |
| PKH_020500 | -0.1616 | -0.1412 | -0.1945 | -0.0296 | -0.1299 | -0.2793 | -1.7158 |
| PKH_131420 | 0.65339 | 1.0281  | 1.37643 | 1.30361 | 0.92983 | 0.9673  | 0.71229 |
| PKH_126740 | 0.87815 | 0.73079 | 0.72772 | 0.61895 | 0.67377 | 0.48493 | 0.61065 |
| PKH_130250 | -0.9377 | -0.31   | 0       | 0.27477 | -0.3529 | -0.3529 | 0.31002 |
| PKH_125540 | 0.23047 | 0.30603 | 0.39118 | 0.21411 | -0.1599 | -0.2361 | 0.26392 |
| PKH_093770 | -0.5781 | -0.3492 | -0.2584 | -0.5897 | -0.2341 | -0.3761 | -0.6559 |
| PKH_092110 | 0.68704 | 0.83442 | 0.73449 | 0.60492 | 0.47805 | 0.33153 | 0.09858 |
| PKH_041160 | -0.7311 | -0.8168 | -0.7121 | -0.7389 | -0.8107 | -0.8321 | -1.2968 |
| PKH_142730 | 0.56086 | 0.30602 | 0.35517 | 0.50263 | 0.61875 | 0.49242 | 0.47701 |
| PKH_121060 | 0.81541 | 0.78162 | 0.51821 | 0.60713 | 0.41864 | 0.3991  | 0.59566 |
| PKH_140250 | -0.5138 | -0.472  | 0.03639 | 0.27151 | -0.0128 | 0.38558 | 0.05899 |
| PKH_091380 | 0.25155 | 0.2806  | 0.50903 | 0.44666 | 0.04564 | -0.0804 | 0.13492 |
| PKH_113210 | 0.84891 | 0.85791 | 1.01504 | 0.76452 | 0.61326 | 0.38224 | 0.22984 |
| PKH_091070 | -0.4818 | -0.3616 | -0.3828 | -0.379  | -0.5845 | -0.5979 | -0.7503 |
| PKH_125580 | -0.1656 | -0.3057 | 0.01675 | 0.22245 | 0.51954 | 0.55236 | 0.53635 |
| PKH_143600 | 0.34667 | 0.27451 | 0.14805 | -0.1072 | 0.29156 | 0.0206  | 0.2294  |
| PKH_123290 | -0.0276 | 0.01564 | 0.03806 | 0.31395 | -0.0134 | 0.09519 | 0.1139  |
| PKH_113670 | 0.26771 | 0.22166 | 0.05633 | 0.05928 | -0.2371 | -0.4974 | -0.0166 |
| PKH_110740 | 0.01434 | 0.17713 | 0.14897 | -0.2895 | -0.0622 | -0.2219 | -0.7628 |
| PKH_010330 | -0.3021 | -0.5599 | -0.5628 | -0.3152 | -0.0268 | -0.1748 | -0.2627 |
| PKH_133690 | -0.1286 | -0.1306 | -0.0785 | -0.0286 | 0.42777 | 0.84704 | 0.92834 |
| PKH_103130 | 0.2507  | 0.22816 | 0.23699 | 0.07884 | 0.04947 | -0.1868 | -0.1008 |
| PKH_061930 | -0.0149 | -0.1306 | 0.06159 | 0.00467 | -0.1631 | -0.2292 | -0.4136 |
| PKH_131810 | 0.27577 | 0.17874 | 0.24256 | 0.12425 | 0.12401 | 0.34573 | 0.44467 |
| PKH_011370 | -1.0768 | -1.0758 | -1.2821 | -1.1068 | -0.6587 | -0.5397 | -0.5772 |
| PKH_072760 | -2.4526 | -3.3877 | -2.5781 | -1.7001 | -0.4579 | -0.3065 | -1.0313 |
| PKH_110500 | -0.7782 | -1.1855 | -1.1596 | -0.6778 | -0.4801 | -0.1909 | -0.335  |
| PKH_120940 | 0.13388 | 0.29261 | 0.53107 | 0.56899 | 0.43561 | 0.22258 | -0.0031 |
| PKH_123230 | 0.18569 | 0.47737 | 0.52333 | 0.6557  | 0.50602 | -0.2526 | -0.4904 |
| PKH_083600 | -0.3732 | -0.5989 | -0.6083 | -0.6371 | -0.3739 | -0.3221 | 0.18251 |
| PKH_130990 | 0.04905 | 0.43914 | 0.69801 | 0.68391 | 0.38963 | 0.26292 | 0.35646 |
| PKH_020510 | 0.23547 | -0.0576 | -0.1269 | -0.2346 | 0       | -0.2418 | -0.2242 |
| PKH_031030 | -0.1936 | -0.0704 | 0.07661 | 0.40295 | 0.12425 | 0.00256 | -0.3096 |
| PKH_102390 | -0.7973 | -0.5542 | -0.4386 | -0.4194 | -0.5266 | -0.6117 | -0.6985 |
| PKH_114180 | 0.30653 | 0.21739 | 0.40328 | 0.61812 | 0.36665 | 0.34481 | 0.42263 |
| PKH_143190 | 0.30125 | 0.16506 | -0.075  | 0.10741 | 0.06944 | 0.00668 | 0.27401 |

|            |         |         |         |         |         |         |         |
|------------|---------|---------|---------|---------|---------|---------|---------|
| PKH_070990 | -0.0836 | 0.0685  | -0.0504 | -0.1383 | -0.0623 | -0.3478 | -0.1453 |
| PKH_030130 | -1.3018 | -1.169  | -1.7151 | -1.2229 | -1.8636 | -1.6658 | -2.8135 |
| PKH_142230 | 0.55211 | 0.56698 | 0.62045 | 0.50655 | 0.58513 | 0.6277  | 0.6382  |
| PKH_102440 | -0.724  | -0.7779 | -0.6472 | -0.5722 | -0.408  | -0.3007 | -0.0173 |
| PKH_114130 | 0.15547 | 0.45124 | 0.36703 | 0.73949 | 0.25835 | 0.17732 | -1.4291 |
| PKH_073070 | -0.2569 | -0.291  | -0.0704 | 0.05987 | 0.06019 | 0.06016 | -0.1402 |
| PKH_133290 | 0.49009 | 0.42147 | 0.11549 | -0.031  | -0.0116 | -0.0275 | -0.0606 |
| PKH_114520 | -0.2466 | -0.221  | -0.3333 | -0.0707 | -0.2844 | -0.0537 | -1.4844 |
| PKH_134210 | -0.4823 | -1.2221 | -1.6599 | -2.4916 | -2.0623 | -0.9498 | -0.3139 |
| PKH_071740 | -0.2668 | -0.07   | -0.102  | -0.0836 | -0.2461 | -0.2501 | -0.7895 |
| PKH_100930 | 0.18961 | 0.28825 | 0.37267 | 0.15329 | 0.24271 | 0.13711 | -0.3233 |
| PKH_052170 | -0.674  | -0.6395 | -0.8106 | -0.5233 | -0.4376 | -0.7649 | -2.2417 |
| PKH_011380 | -0.1719 | 0.06901 | 0.08433 | 0.12009 | -0.2988 | -0.459  | -0.2079 |
| PKH_081430 | 0.14581 | 0.23458 | 0.47927 | 0.26547 | 0.64335 | 0.36867 | 0.30246 |
| PKH_113180 | 0.81028 | 0.54618 | 0.75687 | 0.4644  | 0.58122 | 0.64337 | 0.58858 |
| PKH_101900 | 1.52538 | 1.26803 | 1.01596 | 0.66075 | 0.04567 | -0.2484 | 0.31159 |
| PKH_132520 | 0.50428 | 0.31959 | 0.03118 | 0.2062  | -0.3929 | -0.5213 | -0.4408 |
| PKH_132280 | 0.51153 | 0.64298 | 0.20747 | 0.42056 | 0.36964 | 0.18936 | 0.11033 |
| PKH_132630 | -0.1476 | 0.15868 | -0.0325 | 0.14389 | -0.138  | 0.15416 | -0.2769 |
| PKH_101590 | 0.24074 | 0.30769 | -0.0556 | -0.1173 | -0.3486 | -0.567  | -0.04   |
| PKH_122300 | -0.0272 | -0.1078 | -0.1332 | -0.0791 | -0.1923 | 0.28624 | 0.20418 |
| PKH_051870 | -1.0522 | -1.0471 | -0.9801 | -1.1768 | -1.0473 | -0.7364 | -1.0045 |
| PKH_011270 | -1.322  | -1.7053 | -1.8504 | -2.2355 | -1.7246 | -1.1828 | -1.3587 |
| PKH_040560 | -0.6905 | -0.9347 | -0.6076 | -0.9733 | -0.7825 | -0.7987 | -0.5743 |
| PKH_051960 | 0.24252 | 0.21087 | -0.0681 | -0.1758 | -0.4284 | -0.4475 | -0.0783 |
| PKH_146800 | -0.0019 | 0.11419 | 0.40388 | 0.58219 | 0.22836 | 0.10845 | 0.25258 |
| PKH_060380 | 0.31682 | 0.09008 | -0.0608 | -0.1912 | -0.2723 | -0.2975 | -0.8755 |
| PKH_100100 | 1.09865 | 1.26379 | 1.41744 | 1.23527 | 1.19293 | 1.03293 | 0.82222 |
| PKH_082740 | 0.24199 | 0.38647 | 0.25433 | 0.0862  | 0.05378 | 0.07058 | 0.43383 |
| PKH_030950 | -0.2149 | -0.2098 | 0.01094 | 0.18912 | 0.08518 | -0.194  | -0.7391 |
| PKH_126090 | 0.33119 | -0.0084 | -0.0348 | -0.0969 | -0.0176 | 0.09591 | 0.45803 |
| PKH_082390 | -0.6006 | -0.4601 | -0.4691 | -0.5146 | -0.2835 | -0.4497 | -0.5639 |
| PKH_144550 | -0.7435 | -0.71   | -0.8188 | -0.6782 | -0.3194 | -0.376  | -0.1641 |
| PKH_041030 | -0.3302 | -0.2761 | -0.2305 | -0.1775 | -0.3591 | -0.0625 | -1.015  |
| PKH_061230 | 0.01555 | -0.0923 | -0.1502 | -0.3134 | -0.181  | -0.5033 | -0.3463 |
| PKH_060830 | 0.26542 | 0.28551 | 0.5759  | 0.61868 | 0.59093 | 0.49932 | 0.32609 |
| PKH_040880 | 0.26482 | 0.36046 | 0.45461 | 0.68122 | 0.51251 | 0.3624  | 0.45121 |
| PKH_051030 | -0.1575 | -0.0952 | -0.3037 | 0.02639 | -0.071  | -0.1255 | -1.6301 |
| PKH_050340 | 0.40077 | 0.40685 | 0.69008 | 0.28631 | 0.37789 | 0.1246  | -0.0511 |
| PKH_132780 | -0.8191 | -0.869  | -1.3831 | -1.2457 | -1.4897 | -1.4272 | -1.291  |
| PKH_100090 | 0.07891 | -0.4252 | -0.0982 | 0.72577 | 1.10911 | 1.21669 | 0.96086 |
| PKH_146200 | 0.5115  | 0.71319 | 0.6731  | 0.62217 | 0.41647 | 0.3947  | 0.49929 |
| PKH_040290 | 0.1332  | 0.05406 | 0.17803 | -0.0686 | -0.1298 | -0.2651 | -0.4669 |
| PKH_050720 | -0.1907 | -0.0453 | 0.14045 | 0.31043 | 0.00583 | -0.1677 | -0.2278 |
| PKH_122550 | 0.2726  | 0.47372 | 0.73534 | 0.8274  | 0.78756 | 0.72432 | 1.0329  |
| PKH_133880 | 0.54127 | 0.33704 | 0.36675 | 0.11943 | 0.4412  | 0.36535 | 0.67925 |
| PKH_090150 | -0.631  | -0.5314 | -0.3279 | -0.06   | -0.0054 | -0.1904 | -0.3969 |
| PKH_122940 | -1.1883 | -1.487  | -1.0576 | -1.4647 | -0.9497 | -0.2295 | -0.1528 |
| PKH_146360 | -0.1093 | -0.0484 | 0.34591 | 0.11422 | 0.18743 | 0.13224 | 0.1074  |
| PKH_130880 | -0.2758 | -0.3713 | -0.289  | -0.6781 | -0.3599 | -0.6917 | -1.5739 |
| PKH_072920 | 0.35774 | 0.56793 | 0.65912 | 0.63427 | 0.56144 | 0.3384  | 0.19799 |
| PKH_021020 | -0.5413 | -0.4067 | -0.478  | -0.4716 | -0.5139 | -0.5074 | -2.1184 |
| PKH_092010 | -0.2459 | -0.2771 | -0.3021 | -0.1504 | -0.0412 | -0.1525 | -0.2054 |
| PKH_010800 | 0.42855 | 0.59082 | 0.20546 | 0.29317 | 0.24707 | 0.12169 | 0.32248 |
| PKH_111620 | -0.7187 | -0.6139 | -0.6884 | -0.9577 | -0.5695 | -0.5878 | -0.5311 |
| PKH_125170 | 0.15721 | -0.0699 | -0.0369 | -0.1374 | 0.345   | 0.24027 | 0.37996 |
| PKH_145710 | 0.72376 | 0.54857 | 0.84163 | 0.8473  | 0.60504 | 0.52466 | 0.98598 |
| PKH_071160 | 0.04977 | -0.1523 | 0.01306 | 0.49528 | 0.88192 | 1.03128 | 1.03132 |
| PKH_021350 | -0.3059 | 0.26669 | 1.05118 | 1.24073 | 1.27871 | 0.84734 | 0.41393 |
| PKH_103200 | 0.45742 | 0.01826 | -0.2384 | -0.0971 | -0.2351 | 0.3057  | 0.90932 |
| PKH_112150 | -0.445  | -0.45   | -0.6591 | -0.6255 | -0.6092 | -0.3716 | -0.6097 |
| PKH_122020 | -0.011  | -0.0878 | -0.0593 | -0.26   | -0.0971 | -0.0278 | 0.13972 |
| PKH_090990 | 0.38881 | 0.69243 | 0.75485 | 0.78988 | 0.81638 | 0.61336 | 0.34851 |

|            |         |         |         |         |         |         |         |
|------------|---------|---------|---------|---------|---------|---------|---------|
| PKH_134050 | -0.3711 | -0.0905 | -0.136  | -0.1886 | -0.002  | -0.1521 | -0.412  |
| PKH_142110 | -0.2846 | -0.4366 | -0.0464 | 0.32202 | 0.46664 | 0.54376 | 0.60477 |
| PKH_134000 | 0.2373  | 0.276   | 0.27722 | 0.40264 | 0.30395 | 0.48088 | 0.28548 |
| PKH_060310 | -0.2248 | -0.3677 | -0.642  | -0.3719 | -0.454  | -0.2084 | -0.6114 |
| PKH_102360 | 0.29522 | 0.37034 | 0.55336 | 0.37623 | 0.01136 | 0.06805 | -0.1096 |
| PKH_125230 | 1.06359 | 0.84888 | 0.36965 | -0.1301 | 0.16002 | 0.66476 | 1.2822  |
| PKH_082950 | 0.16706 | 0.28276 | 0.29565 | 0.17026 | 0.27278 | 0.52153 | 0.5987  |
| PKH_101910 | -0.4173 | -0.4234 | -0.8068 | -0.7645 | -1.0934 | -0.9869 | -1.9198 |
| PKH_090160 | -0.0096 | 0.11458 | 0.39825 | 0.80571 | 0.6944  | 0.47029 | -0.1259 |
| PKH_052180 | -0.9758 | -0.7816 | -1.0096 | -0.9024 | -0.708  | -0.9626 | -2.4358 |
| PKH_011100 | 0.48639 | 0.74443 | 0.34394 | 0.24735 | 0.34235 | -0.154  | -0.7349 |
| PKH_040890 | 0.20864 | 0.616   | 0.3063  | 0.25443 | 0.01192 | 0.10904 | 0.32386 |
| PKH_141350 | -0.0938 | -0.0475 | -0.3073 | -0.1335 | -0.2743 | -0.2114 | -0.014  |
| PKH_110210 | 0.35808 | 0.43155 | 0.71704 | 0.83249 | 0.9229  | 0.46552 | 0.79975 |
| PKH_146680 | 0.30995 | 0.44374 | 0.53762 | 0.77653 | 0.73352 | 0.58306 | 0.48436 |
| PKH_080120 | 0.56037 | 0.67516 | 0.75512 | 0.66793 | 0.32359 | 0.49516 | 0.39636 |
| PKH_123640 | -0.4362 | -0.3856 | -0.1354 | -0.2277 | -0.2682 | -0.2341 | -0.015  |
| PKH_125030 | -0.7371 | -0.0806 | 0.00187 | 0.31722 | -0.0572 | 0.0199  | -1.2007 |
| PKH_121450 | 0.98217 | 1.25522 | 1.37299 | 1.28694 | 0.91057 | 0.58058 | 0.71341 |
| PKH_070970 | 0.06071 | 0.09712 | 0.2191  | 0.49359 | 0.48607 | 0.30495 | 0.41943 |
| PKH_101170 | 0.12399 | -0.1153 | -0.2477 | -0.3032 | -0.2278 | -0.2744 | -0.0358 |
| PKH_080990 | 0.03933 | -0.0416 | -0.086  | -0.182  | 0.04028 | 0.17252 | 0.72861 |
| PKH_121130 | 0.13421 | 0.16866 | 0.16524 | 0.1673  | -0.0749 | -0.1961 | -0.0446 |
| PKH_130840 | 0.08907 | 0.19559 | 0.30864 | 0.35506 | 0.45711 | 0.19615 | 0.59361 |
| PKH_124540 | 0.3798  | 0.37523 | 0.65438 | 0.66524 | 1.22492 | 1.43645 | 1.88985 |
| PKH_030900 | 0.83506 | 0.97142 | 1.14008 | 0.98628 | 0.86588 | 0.44686 | 0.43745 |
| PKH_123120 | -0.2846 | -0.4499 | -0.5897 | -0.601  | -0.4189 | -0.2357 | 0.24837 |
| PKH_142600 | 0.02764 | -0.0486 | 0.07318 | 0.09883 | 0.21297 | 0.05899 | 0.20748 |
| PKH_101070 | 0.04311 | 0.19015 | -0.0052 | -0.0903 | -0.1161 | -0.3265 | -0.4484 |
| PKH_120610 | -0.183  | -0.013  | 0.03249 | -0.0439 | 0.0885  | -0.1547 | -1.476  |
| PKH_111040 | 0.27621 | 0.45622 | 0.40377 | 0.56027 | 0.17044 | -0.0154 | 0       |
| PKH_090350 | 0.47337 | 0.63636 | 0.35605 | 0       | 0.34925 | 0.04133 | 0.07337 |
| PKH_133410 | 0.66342 | 0.69066 | 0.67212 | 0.62689 | 0.38353 | 0.08885 | 0.19545 |
| PKH_143580 | 0.29164 | 0.03142 | 0.23539 | 0.17656 | 0.47318 | 0.3775  | 0.47755 |
| PKH_113120 | 0.73631 | 0.92603 | 0.8265  | 0.97353 | 0.68212 | 0.40724 | 0.41258 |
| PKH_112900 | -0.3889 | -0.5153 | -0.7669 | -0.7571 | -0.4841 | -0.1187 | -0.1945 |
| PKH_081170 | -0.2464 | -0.6307 | -0.6066 | 0.11898 | 0.7014  | 0.93543 | 1.43069 |
| PKH_060010 | 0.01711 | -0.1067 | -0.1831 | -0.3954 | -0.8051 | -0.7019 | -0.3366 |
| PKH_141890 | 0.23704 | -0.0194 | -0.0212 | -0.1543 | 0.13173 | 0.08805 | 0.06919 |
| PKH_070210 | 0.58176 | 0.58413 | 0.72396 | 0.56582 | 0.40179 | 0.25921 | -0.1912 |
| PKH_144610 | 1.07002 | 1.3475  | 1.37527 | 1.15677 | 0.75854 | 0.22892 | 0.02996 |
| PKH_113220 | 0.04817 | 0.02791 | -0.021  | -0.0327 | -0.1403 | -0.0934 | -1.5362 |
| PKH_102790 | 0.50818 | 0.85524 | 0.85609 | 0.58253 | 0.57485 | 0.58826 | 0.57461 |
| PKH_051530 | 0.22764 | 0.19884 | 0.0628  | 0.18488 | 0.17042 | -0.0288 | -0.5267 |
| PKH_121530 | 0.50907 | 0.36033 | 0.40579 | 0.69981 | 0.33716 | 0.42069 | -0.1298 |
| PKH_130170 | 0.51764 | 0.90799 | 1.07018 | 1.22802 | 0.9075  | 0.68118 | 0.77574 |
| PKH_145860 | 0.91179 | 1.33224 | 1.40562 | 1.19771 | 0.84177 | 0.77378 | 1.05579 |
| PKH_124420 | 0.25419 | 0.15061 | 0.23473 | 0.16285 | 0.01419 | 0.24803 | 0.27553 |
| PKH_030350 | -0.4118 | -0.1891 | -0.4542 | -0.2068 | -0.4907 | -0.822  | -0.9983 |
| PKH_052500 | -0.9448 | -0.5475 | -0.3045 | 0.22656 | 0.43512 | 0.39278 | 0.21236 |
| PKH_146920 | 0.12852 | 0.14677 | -0.0326 | -0.2244 | -0.148  | -0.1202 | 0.27366 |
| PKH_133220 | -0.679  | -0.1955 | 0.23161 | 0.40692 | 0.34525 | 0.42559 | 0.29211 |
| PKH_090840 | 0.45411 | 0.34784 | 0.65285 | 0.67911 | 0.40408 | 0.34605 | 0.27127 |
| PKH_140150 | -0.2534 | -0.0409 | -0.017  | 0.23505 | -0.2153 | -0.1369 | -0.3464 |
| PKH_132600 | -0.2599 | -0.2431 | -0.1196 | -0.2242 | -0.1174 | -0.0127 | 0.03847 |
| PKH_011030 | -0.8769 | -0.9268 | -1.065  | -1.2964 | -0.955  | -0.8488 | -1.294  |
| PKH_113440 | 0.22989 | 0.28951 | 0.2091  | 0.31276 | 0.65297 | 0.81107 | 0.72263 |
| PKH_101980 | 0.32083 | 0.51541 | 0.36441 | 0.42909 | -0.0927 | -0.1892 | -0.2104 |
| PKH_101280 | -0.3065 | -0.0171 | 0.06038 | -0.1662 | -0.103  | -0.1807 | -0.0193 |
| PKH_121910 | 0.19283 | 0.14276 | -0.2293 | 0.02114 | -0.1956 | -0.2001 | -1.5835 |
| PKH_094070 | -0.3858 | -0.3532 | -0.4025 | -0.2396 | -0.3022 | -0.2522 | -0.5264 |
| PKH_092130 | -0.0028 | 0.19235 | 0.40884 | 0.45268 | 0.51505 | 0.62178 | 0.43295 |
| PKH_111780 | 0.14224 | 0.26587 | 0.15259 | 0.3551  | 0.10493 | 0.1963  | -0.1068 |

|            |         |         |         |         |         |         |         |
|------------|---------|---------|---------|---------|---------|---------|---------|
| PKH_101100 | 0.55713 | 1.40344 | 1.09499 | 1.04344 | 0.92873 | 0.40944 | 0.07396 |
| PKH_101060 | 0.05477 | 0.08282 | 0.26691 | 0.28059 | 0.17281 | 0.10194 | -0.2523 |
| PKH_146270 | 0.51728 | 0.71518 | 0.83636 | 0.88145 | 0.85627 | 0.62582 | 0.54374 |
| PKH_123250 | -0.4031 | 0.0191  | 0.15939 | 0.104   | 0.27805 | -0.0087 | -0.3765 |
| PKH_123050 | 0.24449 | 0.08056 | -0.2574 | 0.17132 | 0.68129 | 0.73443 | 0.68533 |
| PKH_103140 | 0.467   | 0.41359 | 0.61826 | 0.63603 | 0.34909 | 0.12171 | -0.2606 |
| PKH_072210 | 0.11807 | 0.12891 | 0.31467 | 0.09445 | 0.29582 | 0.08946 | -1.3415 |
| PKH_133640 | 0.31884 | 0.20893 | 0.03492 | 0.11888 | 0.6414  | 0.85821 | 0.71343 |
| PKH_144290 | 0.00771 | 0.17823 | 0.13862 | -0.0263 | 0.09214 | 0.21984 | 0.26838 |
| PKH_122540 | 0.54794 | 0.68896 | 1.10265 | 1.46979 | 1.60313 | 1.47815 | 1.15602 |
| PKH_081220 | 0.38657 | 0.19368 | 0.06935 | 0.26291 | 0.00732 | -0.0566 | 0.00483 |
| PKH_145600 | -1.0001 | -1.1215 | -0.9973 | -1.0128 | -0.8475 | -0.1704 | 0.02599 |
| PKH_112560 | -0.4074 | -0.2299 | -0.0865 | -0.175  | -0.3099 | -0.4362 | -2.0374 |
| PKH_094000 | 0.60474 | 0.30659 | 0.46624 | 0.37348 | 0.14243 | 0.13028 | 0.40436 |
| PKH_051880 | -0.4399 | -0.3164 | -0.3888 | -0.5206 | -0.4994 | -0.4773 | -0.7899 |
| PKH_092090 | -0.4333 | -0.5902 | -0.7496 | -0.9287 | -0.949  | -0.7512 | -1.0538 |
| PKH_123560 | -0.3316 | -0.1078 | 0.04998 | 0.17461 | 0.07484 | 0.01819 | 0.07916 |
| PKH_092140 | -0.0938 | -0.0634 | -0.0519 | -0.3545 | -0.5226 | -0.1706 | 0.05023 |
| PKH_072290 | 0.36878 | 0.49676 | 0.41026 | 0.37757 | 0.2409  | 0.09467 | -0.1876 |
| PKH_144470 | -0.0453 | -0.0812 | -0.222  | -0.0388 | -0.0697 | -0.1165 | -0.2484 |
| PKH_070004 | 1.07502 | 0.93347 | 0.97177 | 0.53636 | 0.76214 | 0.89835 | 1.2859  |
| PKH_144490 | -0.2492 | 0.15822 | -0.1591 | -0.1677 | -0.2654 | -0.2199 | -0.3566 |
| PKH_090330 | -0.1061 | 0.17422 | 0.23419 | 0.46926 | 0.20266 | 0.24031 | 0.06481 |
| PKH_121250 | 0.28562 | 0.17621 | -0.044  | -0.3367 | -0.2648 | -0.7594 | -1.1453 |
| PKH_123730 | 0.12879 | -0.1133 | -0.0934 | -0.0407 | 0.0961  | 0.28037 | 0.14894 |
| PKH_102260 | 0.3538  | -0.1773 | -0.2453 | -0.2129 | -0.3881 | -0.2779 | -1.7891 |
| PKH_102710 | -0.005  | 0.19942 | 0.0642  | 0.32094 | 0.15574 | 0.20459 | 0.13408 |
| PKH_050090 | 0.2323  | 0.18945 | -0.1365 | -0.7163 | -0.1853 | 0.1795  | 0.5525  |
| PKH_140200 | 0.18493 | 0.22167 | 0.37921 | 1.19853 | 1.19218 | 1.29107 | 1.28042 |
| PKH_127030 | 0.72916 | 0.84158 | 0.86875 | 0.95632 | 0.60386 | 0.38576 | 0.57749 |
| PKH_133180 | 0.08787 | 0.11862 | 0.24993 | 0.19963 | 0.21713 | 0.19086 | 0.09631 |
| PKH_102350 | 0.32848 | 0.05044 | -0.1904 | -0.5244 | -0.4557 | -0.1375 | 0.04659 |
| PKH_020870 | -0.0337 | 0.21464 | 0.071   | -0.3051 | 0.07644 | -0.3272 | -1.4111 |
| PKH_111230 | 0.32194 | 0.21965 | 0.5252  | 0.67625 | 0.23321 | 0.44763 | 0.02208 |
| PKH_030320 | 0.16038 | 0.63367 | 0.68829 | 0.39815 | 0.47402 | 0.08834 | -1.007  |
| PKH_141930 | 0.02003 | -0.1645 | 0.01899 | 0.01172 | 0.08386 | -0.0439 | -0.2409 |
| PKH_100920 | -0.4243 | -0.6662 | -1.0556 | -1.6036 | -1.6158 | -1.0767 | -0.5978 |
| PKH_142640 | 0.68142 | 0.69678 | 0.88277 | 1.27649 | 0.8916  | 0.76706 | 0.79194 |
| PKH_030760 | 0.86968 | 0.98805 | 0.89806 | 0.90799 | 0.58794 | 0.4419  | 0.97274 |
| PKH_125790 | -0.15   | -0.0298 | -0.1242 | -0.284  | -0.29   | -0.1893 | -0.4234 |
| PKH_030190 | -0.3373 | -0.0711 | -0.4734 | -0.2175 | -0.3182 | -0.3939 | -1.6744 |
| PKH_011400 | -0.1388 | -0.1779 | -0.0026 | -0.2477 | -0.4556 | -0.3475 | -0.1479 |
| PKH_050890 | -0.5543 | -0.4102 | -0.7531 | -0.6195 | -0.5744 | -0.5266 | -0.6932 |
| PKH_060880 | 0.63564 | 0.80697 | 0.46154 | 0.60688 | 0.12488 | -0.1032 | 0.12777 |
| PKH_122710 | -0.2172 | -0.0448 | 0.10464 | -0.0199 | -0.0072 | -0.0204 | -0.3629 |
| PKH_143500 | 0.5574  | 0.40229 | 0.19096 | 0.28296 | 0.49989 | 0.45154 | 0.70401 |
| PKH_113590 | 0.25372 | 0.10811 | 0.04461 | -0.0866 | 0.09998 | 0.08957 | 0.04921 |
| PKH_110300 | -0.1664 | -0.0102 | 0.1073  | 0.2314  | 0.13933 | 0.05446 | -0.1281 |
| PKH_113410 | -0.084  | 0.09742 | 0.13863 | -0.0652 | 0.29743 | 0.28581 | 0.29385 |
| PKH_130070 | 0.47755 | 0.58968 | 0.57551 | 0.42284 | 0.31222 | 0.08415 | 0.03529 |
| PKH_083240 | -0.2909 | -0.3507 | -0.1479 | -0.1014 | -0.1724 | -0.0881 | -0.0157 |
| PKH_060290 | 0.6728  | 0.90288 | 0.85567 | 0.70228 | 0.34415 | 0.31788 | -0.7959 |
| PKH_146460 | -0.5997 | -0.5725 | -0.8678 | -0.7738 | -0.9366 | -0.8619 | -0.7159 |
| PKH_121140 | -0.3388 | -0.4815 | 0.07073 | 0.46706 | 0.31775 | 0.39011 | 0.3294  |
| PKH_123260 | -0.3058 | -0.0048 | 0.28465 | 0.30717 | 0.22553 | -0.1037 | -0.2407 |
| PKH_124220 | 0.48251 | 0.72562 | 0.72349 | 0.56796 | 0.3496  | 0.18771 | 0.47333 |
| PKH_060070 | 0.20867 | -0.6601 | -1.4119 | -1.8334 | -0.0845 | 0.97173 | 1.32864 |
| PKH_132580 | 0.13051 | -0.0682 | -0.1602 | -0.1206 | 0.31656 | 0.88146 | 1.04656 |
| PKH_080850 | -0.0062 | -0.101  | 0.0208  | -0.0992 | 0.08628 | 0.03903 | 0.05197 |
| PKH_110910 | -0.1954 | -0.1665 | 0.10613 | -0.3024 | -0.2476 | -0.1644 | -0.069  |
| PKH_081690 | -0.5887 | -1.0179 | -0.8029 | -1.1037 | -0.3271 | 0.17396 | 0.04273 |
| PKH_144930 | 0.51455 | 0.29621 | 0.47247 | 0.55989 | 0.10953 | -0.094  | -0.2655 |
| PKH_101310 | -0.607  | -0.6376 | -0.7363 | -0.9591 | -0.3533 | -0.4817 | -0.274  |

|            |         |         |         |         |         |         |         |
|------------|---------|---------|---------|---------|---------|---------|---------|
| PKH_142720 | 0.47568 | 0.5399  | 0.73442 | 0.72393 | 0.8713  | 0.8187  | 0.51567 |
| PKH_050060 | 0.5842  | 0.39267 | 0.26012 | -0.1118 | -0.1078 | -0.133  | 0.57136 |
| PKH_010850 | -0.4185 | -0.5573 | -0.755  | -0.3759 | -0.4768 | -0.276  | -0.9003 |
| PKH_010950 | -1.0218 | -0.859  | -1.1246 | -0.9381 | -1.1496 | -1.1468 | -1.6664 |
| PKH_123310 | 0.77712 | 0.45267 | 0.20023 | 0.02383 | 0.05713 | 0.17456 | 0.37352 |
| PKH_030680 | -0.7525 | -0.5809 | -0.5958 | -0.3571 | -0.3794 | -0.423  | -0.5917 |
| PKH_051140 | -0.0396 | 0.27905 | 0.40168 | 0.30588 | 0.33917 | 0.27991 | -0.0998 |
| PKH_020790 | -0.1493 | 0       | -0.0439 | 0.01133 | -0.0583 | -0.156  | -0.3407 |
| PKH_114900 | 0.06684 | -0.1778 | -0.2056 | -0.2129 | 0.01216 | -0.1064 | 0.3281  |
| PKH_144460 | 0.24287 | -0.0045 | 0.04788 | 0.07005 | 0.03804 | 0.11973 | 0.42458 |
| PKH_031230 | 0.18085 | -0.2364 | -0.0354 | 0.51167 | 1.09225 | 1.01945 | 1.24838 |
| PKH_073280 | -0.6006 | -0.5076 | -0.474  | -0.601  | -0.122  | 0.16625 | -0.0904 |
| PKH_112100 | -0.1043 | -0.3213 | -0.3997 | -0.6427 | -0.3032 | 0.51764 | 0.96924 |
| PKH_071920 | 0.37283 | 0.35405 | 0.1173  | -0.0113 | 0.19473 | 0.17556 | -0.1499 |
| PKH_040030 | 0.29288 | 0.18765 | 0.3222  | 0.27313 | 0.11256 | 0.48312 | 0.69101 |
| PKH_102410 | -0.8628 | -0.7129 | -0.95   | -0.7359 | -0.9234 | -0.9617 | -0.5571 |
| PKH_010590 | -0.2868 | -0.1205 | -0.2    | -0.2465 | -0.1934 | -0.1404 | -0.2488 |
| PKH_113820 | -0.0947 | -0.016  | -0.142  | -0.1042 | -0.1705 | -0.0712 | -0.2531 |
| PKH_090810 | 0.2925  | 0.1587  | 0.42297 | 0.52121 | 0.63156 | 0.67523 | 0.6317  |
| PKH_112430 | 1.19441 | 0.67133 | 0.20568 | -0.0919 | 0.12351 | 0.28318 | 0.80875 |
| PKH_071770 | -0.5242 | -0.0871 | -0.1231 | 0.19927 | 0.11229 | -0.2146 | -0.7703 |
| PKH_113010 | -0.021  | 0.07999 | 0.22967 | 0.02909 | 0.0026  | -0.0621 | -0.5136 |
| PKH_145680 | 0.1078  | 0.1357  | 0.18014 | -0.0981 | -0.4109 | -0.5316 | -0.5917 |
| PKH_100980 | -0.6092 | -0.8434 | -0.5873 | -0.1932 | 0.28842 | 0.35533 | -0.2779 |
| PKH_030240 | 0.04315 | 0.06757 | 0.04067 | -0.5054 | -0.3701 | -0.1246 | -0.1385 |
| PKH_071620 | -0.4073 | -0.2788 | -0.2545 | -0.6007 | -0.548  | -0.6105 | -0.4939 |
| PKH_080340 | 0.52497 | 0.57552 | 0.78912 | 0.81037 | 0.46335 | 0.18994 | 0.44925 |
| PKH_010970 | -1.1881 | -1.2622 | -1.3183 | -1.5066 | -1.168  | -0.8739 | -1.1724 |
| PKH_080860 | 0.20784 | 0.21566 | 0.24391 | 0.3888  | 0.26027 | 0.15678 | 0.12186 |
| PKH_112870 | 0.68552 | 0.83332 | 0.94605 | 0.79935 | 0.51358 | 0.39151 | 0.36559 |
| PKH_121280 | -0.1103 | -0.1226 | 0.08113 | 0.29738 | 0.45725 | 0.51709 | 0.54605 |
| PKH_040660 | 0.33532 | 0.82385 | 0.42833 | 0.52539 | 0.30617 | 0.0644  | -0.1214 |
| PKH_133820 | 0.17339 | 0.03548 | -0.0919 | -0.2242 | -0.0501 | 0.09051 | 0.17878 |
| PKH_114240 | -0.3219 | -0.2637 | -0.3104 | -0.4553 | -0.4112 | -0.4283 | -0.3289 |
| PKH_113990 | 0.20688 | 0.27205 | 0.04441 | 0.09638 | 0.27523 | 0.17022 | 0.03607 |
| PKH_112190 | 0.00648 | 0.00176 | -0.2643 | -0.4115 | -0.5691 | -0.6053 | -0.3304 |
| PKH_020700 | -1.0906 | -1.0979 | -0.9209 | -0.5381 | -0.429  | -0.4249 | -0.703  |
| PKH_125400 | 0.20113 | 0.35399 | 0.76947 | 0.68321 | 0.13989 | -0.1385 | -0.4946 |
| PKH_125090 | 0.01726 | -0.3207 | -0.1975 | -0.2532 | -0.2206 | -0.1337 | 0.03108 |
| PKH_071020 | 0.98785 | 1.0592  | 1.10354 | 0.74825 | 0.72379 | 0.8401  | 0.8894  |
| PKH_082680 | 0.22012 | 0.07319 | 0.10185 | 0.24031 | 0.07083 | 0.08844 | 0.01771 |
| PKH_090880 | -0.1631 | 0.13335 | 0.16657 | 0.30704 | 0.15704 | 0.03649 | -0.008  |
| PKH_114890 | 0.77452 | 0.30118 | 0.00289 | -0.3762 | -0.0896 | 0.65813 | 1.3801  |
| PKH_130910 | 0.29696 | 0.33519 | 0.20439 | 0.19214 | 0.44381 | 0.40932 | 0.66638 |
| PKH_041240 | -0.7792 | -0.7689 | -0.1711 | 0.47529 | 0.62665 | 0.87642 | 0.88876 |
| PKH_110110 | 0.23681 | 0.27677 | 0.25855 | 0.20063 | 0.20505 | 0.36334 | 0.65821 |
| PKH_061390 | -0.3569 | -0.0644 | -0.4109 | -0.5953 | -0.7541 | -0.8964 | -1.2451 |
| PKH_102460 | 0.40868 | 0.32891 | -0.2202 | -0.1388 | -0.014  | 0.31159 | 0.0209  |
| PKH_060720 | -0.891  | -1.0406 | -1.1113 | -0.8318 | -0.7925 | -0.4004 | -0.6686 |
| PKH_072460 | 0.75008 | 0.56504 | 0.71275 | 0.81547 | 0.52862 | 0.46346 | 1.20787 |
| PKH_071210 | 0.76182 | 0.55814 | 0.47767 | 0.38553 | 0.34785 | -0.1245 | -0.4502 |
| PKH_030050 | 0.28969 | 0.51101 | 0.46737 | 0.34736 | 0.4856  | 0.59296 | 1.28268 |
| PKH_062160 | -0.5665 | -0.6443 | -0.6236 | -0.6636 | -0.8456 | -0.8177 | -0.9904 |
| PKH_122410 | -0.2207 | -0.2623 | -0.1809 | -0.1423 | -0.0011 | -0.0784 | -0.0331 |
| PKH_052440 | 0.19012 | 0.21662 | 0.12167 | 0.15632 | 0.00337 | 0.00259 | 0.2078  |
| PKH_080630 | 0.65169 | 0.9608  | 0.84594 | 0.65212 | 0.74362 | 0.57646 | 0.21678 |
| PKH_120460 | -0.1196 | -0.085  | -0.1154 | 0.05496 | 0.06775 | -0.0415 | -0.1946 |
| PKH_101790 | -0.0092 | -0.0103 | -0.1138 | -0.3335 | -0.4039 | -0.2279 | -0.0487 |
| PKH_082080 | -0.4827 | -0.3374 | -0.6307 | -0.3859 | -0.4135 | -0.6063 | -1.9709 |
| PKH_131850 | 0.17887 | 0.15482 | 0.3092  | 0.22148 | 0.23252 | 0.35729 | 0.63313 |
| PKH_092730 | -0.0834 | -0.2567 | -0.2364 | -0.4849 | -0.1834 | -0.2299 | -0.2725 |
| PKH_144210 | 0.51757 | 0.30696 | 0.58289 | 0.53388 | 0.42593 | 0.47546 | 0.73619 |
| PKH_131460 | 0.24699 | 0       | -0.2259 | -0.6959 | -0.9498 | -1.4306 | -1.4843 |

|            |         |         |         |         |         |         |         |
|------------|---------|---------|---------|---------|---------|---------|---------|
| PKH_061360 | 0.98358 | 1.06114 | 1.03541 | 0.73713 | 0.65795 | -0.5889 | 0.18973 |
| PKH_093920 | -1.8182 | -2.3063 | -1.9633 | -1.7854 | -1.1065 | -0.575  | -0.1031 |
| PKH_126560 | 0.77163 | 0.79336 | 0.62905 | 0.51165 | 0.45344 | 0.43312 | 0.23705 |
| PKH_120330 | -0.5986 | -0.7097 | -0.5049 | 0.48315 | 0.93306 | 1.01516 | 0.744   |
| PKH_113060 | -0.0141 | -0.1357 | -0.1472 | -0.3724 | -0.3223 | -0.3456 | -0.1842 |
| PKH_073440 | -0.9847 | -0.8016 | -1.0868 | -0.9242 | -0.9179 | -0.9941 | -1.4828 |
| PKH_144480 | 0.50759 | 0.91154 | 1.07574 | 0.82272 | 0.59086 | 0.51573 | 0.5231  |
| PKH_143930 | 0.36643 | 0.42892 | 0.41    | 0.30374 | 0.20189 | 0.33493 | -0.13   |
| PKH_090550 | 0.38585 | 0.65878 | 0.34591 | 0.42127 | 0.12085 | 0.44999 | 0.01642 |
| PKH_091530 | -0.8272 | -0.9425 | -0.7014 | -0.0877 | 0.35265 | 0.54578 | 0.30453 |
| PKH_061050 | 0.80725 | 0.6559  | 0.81659 | 0.55646 | 0.6836  | 0.6031  | 0.83729 |
| PKH_041180 | 0.00298 | 0.00775 | 0.06429 | -0.1357 | -0.1392 | 0.03521 | 0.26728 |
| PKH_134090 | 0.11295 | 0.33726 | 0.34082 | 0.20515 | 0.26566 | -0.1054 | -0.4128 |
| PKH_000420 | -0.2571 | -0.5791 | -0.2134 | -0.4274 | -0.4539 | -0.3292 | -0.1188 |
| PKH_133520 | 0.36232 | 0.74497 | 1.27985 | 1.01111 | 0.9438  | 0.84192 | 0.63224 |
| PKH_080070 | 0.15612 | -0.7625 | -1.3908 | -2.2255 | -1.0518 | 0.51618 | 1.22691 |
| PKH_133500 | 0.73747 | 0.44472 | 0.35279 | 0.28841 | -0.0502 | -0.0131 | 0.39851 |
| PKH_093830 | 0.14731 | 0.26802 | 0.35364 | 0.33538 | 0.47594 | 0.61251 | -0.024  |
| PKH_070040 | -1.4016 | -1.4299 | -1.3133 | -1.1969 | -1.0041 | -1.0211 | -1.5683 |
| PKH_130760 | -0.2688 | 0.01125 | -0.2029 | -0.4577 | -0.4252 | -0.5813 | -0.6432 |
| PKH_091820 | -0.3792 | -0.1882 | 0.00369 | -0.0654 | -0.2076 | -0.3269 | -1.9384 |
| PKH_127000 | 0.00907 | -0.2388 | 0.26299 | 0.23901 | 0.11065 | 0.08891 | -1.3847 |
| PKH_122400 | -0.5213 | -0.5238 | -0.6049 | -0.514  | -0.542  | -0.4419 | -0.4236 |
| PKH_124210 | -0.2646 | -0.1762 | 0.03527 | 0.15388 | 0.37024 | 0.33345 | 0.39767 |
| PKH_071840 | 0.41491 | 0.2888  | 0.14501 | 0.28268 | 0.14426 | 0.26574 | 0.2772  |
| PKH_080670 | 0.5707  | 0.45891 | 0.39695 | 0.33284 | 0.40689 | 0.17075 | 0.33436 |
| PKH_052600 | 0.5931  | 0.34832 | 0.44511 | 0.56728 | 0.49508 | 0.23502 | -0.1797 |
| PKH_123510 | 0.37325 | 0.18825 | 0.00124 | -0.0237 | 0.00228 | -0.2421 | -0.2471 |
| PKH_114680 | -0.6578 | -0.7378 | -0.7612 | -1.0578 | -0.7115 | -0.5945 | -0.3561 |
| PKH_124560 | -0.0018 | 0.14278 | 0.14472 | 0.01023 | -0.0837 | -0.1385 | 0.26803 |
| PKH_126170 | -0.017  | 0.25148 | 0.13867 | 0.19867 | 0.3253  | 0.31886 | 0.28307 |
| PKH_050120 | 0.10877 | -0.0255 | 0.24778 | 0.27172 | 0.28107 | 0.37987 | 0.20152 |
| PKH_145640 | 0.48965 | 0.5524  | 0.64672 | 0.66286 | 0.5183  | 0.49874 | 0.58603 |
| PKH_072770 | 0.06991 | -0.0143 | 0.00357 | 0.06828 | -0.0187 | 0.02221 | -0.5421 |
| PKH_133040 | -0.1738 | -0.4359 | -0.4324 | -0.2953 | 0.13909 | 0.4972  | 0.89342 |
| PKH_031150 | -1.4944 | -1.4158 | -1.5312 | -1.4962 | -1.1376 | -1.225  | -1.9908 |
| PKH_072420 | 0.51932 | 0.63338 | 0.62336 | 0.52756 | 0.51142 | 0.37824 | 0.58727 |
| PKH_011710 | -0.2052 | -0.121  | -0.8867 | -0.0216 | -1.0991 | -0.2213 | -0.8647 |
| PKH_126060 | 0.43414 | 0.26208 | 0.20221 | -0.172  | -0.52   | -0.8259 | -0.4756 |
| PKH_100800 | 0.32499 | 0.07468 | 0.0624  | 0.09309 | 0.1864  | 0.11507 | 0.36968 |
| PKH_112210 | 0.44256 | 0.42383 | 0.52645 | 0.7174  | 0.60865 | 0.52689 | 0.97061 |
| PKH_142620 | 0.65084 | 0.80159 | 0.88155 | 0.85651 | 0.82372 | 0.45291 | -0.2107 |
| PKH_100420 | 0.64237 | 1.02029 | 1.27358 | 1.183   | 1.00968 | 0.79638 | 0.77883 |
| PKH_110920 | 0.20925 | 0.21965 | 0.1488  | 0.07108 | 0.31953 | 0.40816 | 0.49499 |
| PKH_127070 | 0.43282 | 0.26551 | 0.22111 | -0.1725 | -0.5139 | -0.3423 | -0.0104 |
| PKH_050900 | -0.8208 | -0.6338 | -0.5696 | -0.6542 | -0.6078 | -0.8008 | -0.8483 |
| PKH_031940 | 0.05685 | -0.1175 | -0.5343 | -1.1189 | -0.9954 | -0.8169 | -0.3657 |
| PKH_092540 | 0.55947 | 0.50374 | 0.47289 | 0.31232 | 0.65569 | 0.70487 | 0.86515 |
| PKH_050790 | 0.1568  | 0.34339 | 0.2166  | 0.17882 | -0.2734 | -0.3884 | -0.5132 |
| PKH_124300 | 0.26135 | 0.38113 | 0.56755 | 0.67388 | 0.46698 | 0.47919 | 0.33389 |
| PKH_011320 | -0.716  | -0.5619 | -0.8719 | -1.1621 | -1.2697 | -1.2888 | -1.889  |
| PKH_102750 | -0.9515 | -1.0441 | -0.6715 | -0.7434 | -0.9014 | -0.7062 | -0.6935 |
| PKH_072850 | -1.0057 | -1.6669 | -1.5751 | -0.4649 | 0.47478 | 1.07947 | 1.02223 |
| PKH_081010 | -0.9433 | -0.9398 | -1.0088 | -1.2813 | -1.4078 | -1.4276 | -1.4952 |
| PKH_070140 | -0.0077 | 0.03038 | -0.0643 | -0.0314 | -0.0445 | 0.00889 | 0.01816 |
| PKH_134300 | 0.07116 | 0.39189 | 0.25938 | 0.13339 | -0.2188 | -0.6056 | -0.7978 |
| PKH_030590 | -0.0922 | 0.04878 | -0.164  | -0.0665 | -0.1228 | 0.01494 | -0.1185 |
| PKH_132300 | -0.3133 | -0.1924 | -0.3516 | -0.1689 | -0.2428 | -0.1494 | -0.1842 |
| PKH_101560 | -0.0789 | -0.1049 | -0.332  | -0.2948 | -0.0307 | -0.2064 | 0.21188 |
| PKH_141910 | -0.0893 | 0.3332  | 0.44617 | 0.52762 | 0.18732 | -0.0465 | -0.1149 |
| PKH_051540 | -0.9711 | -0.9536 | -0.7932 | -0.9217 | -0.9435 | -0.8934 | -1.37   |
| PKH_125820 | 0.6466  | 0.76523 | 0.79239 | 0.63775 | 0.68943 | 0.65786 | 0.78776 |
| PKH_011500 | -1.0596 | -1.0086 | -1.1337 | -1.3065 | -1.235  | -1.1402 | -1.3289 |

|            |         |         |         |         |         |         |         |
|------------|---------|---------|---------|---------|---------|---------|---------|
| PKH_140750 | 0.32277 | 0.21296 | 0.20583 | 0.03871 | 0.05538 | 0.07802 | 0.27685 |
| PKH_031220 | 0.38308 | 0.10477 | -0.1461 | -0.4711 | 0.02874 | 0.15408 | 0.40783 |
| PKH_145690 | 0.32995 | 0.26852 | 0.05974 | 0.0934  | 0.06433 | 0.02194 | 0.04401 |
| PKH_030690 | 0.66556 | 0.53345 | 0.0432  | 0.4102  | 0.65704 | 0.59982 | 0.92004 |
| PKH_111150 | 0.3343  | 0.4841  | 0.22812 | 0.10667 | 0.13571 | 0.08517 | -0.0243 |
| PKH_122330 | 0.03233 | -0.0549 | 0.12292 | 0.23312 | 0.03716 | 0.04706 | -1.2353 |
| PKH_102800 | 0.68023 | 0.67442 | 0.72186 | 0.73773 | 0.51488 | 0.45091 | 0.27033 |
| PKH_061240 | -0.5649 | -0.4963 | -0.8646 | -0.5117 | -0.5418 | -0.6788 | -2.2342 |
| PKH_111700 | -0.03   | -0.4219 | -0.4217 | -0.4436 | -0.4461 | -0.2439 | -0.4048 |
| PKH_050840 | 0.41038 | 0.29184 | 0.61669 | 0.95128 | 1.17194 | 0.81587 | 0.3155  |
| PKH_090420 | 0.1966  | 0.24141 | 0.24761 | 0.37107 | 0.00181 | -0.2305 | -0.1948 |
| PKH_093970 | -0.1227 | -0.0474 | 0.12244 | 0.33747 | 0.07938 | 0.17338 | -0.2604 |
| PKH_031320 | -0.3225 | -0.4402 | -0.4564 | -0.4969 | -0.4456 | -0.6476 | -0.9149 |
| PKH_130850 | 0.20719 | 0.5111  | 0.71461 | -0.183  | -0.1636 | -0.7843 | -1.4694 |
| PKH_000490 | -0.4727 | -0.8208 | -0.9642 | -1.1125 | -0.3442 | 0.41596 | 0.84937 |
| PKH_145940 | 0.14498 | 0.23008 | 0.1153  | -0.3944 | -0.5343 | -0.6388 | -0.7672 |
| PKH_060940 | -0.2207 | -0.4427 | -0.5744 | -0.4746 | -0.207  | -0.7215 | -1.1637 |
| PKH_140320 | 0.31719 | 0.20193 | 0.24142 | 0.30421 | 0.16595 | -0.8513 | 0.075   |
| PKH_142970 | 0.32774 | 0.37857 | 0.37822 | 0.48134 | 0.3192  | 0.26629 | 0.44901 |
| PKH_090030 | 0.54134 | 0.41089 | 0.52783 | 0.28715 | 0.17715 | 0.29356 | 0.56197 |
| PKH_123160 | 0.36914 | 0.67709 | 0.76766 | 0.63383 | 0.5459  | 0.40834 | 0.63956 |
| PKH_050250 | -0.2102 | 0.04963 | 0.06686 | 0.11602 | -0.053  | -0.1014 | -0.2508 |
| PKH_081900 | -0.6728 | -0.6747 | -0.7367 | -0.4731 | -0.6223 | -0.4774 | -1.3563 |
| PKH_142090 | 0.68638 | 0.9412  | 0.91249 | 0.64195 | 0.80769 | 0.53578 | 0.43354 |
| PKH_122390 | 0.59369 | 0.86311 | 1.02573 | 1.37509 | 1.11277 | 0.71683 | 0.65739 |
| PKH_111820 | -0.1659 | -0.1256 | -0.3273 | -0.0664 | -0.3386 | -0.5468 | -1.7516 |
| PKH_031780 | 0.4251  | 0.38172 | 0.32255 | 0.19016 | 0.22365 | 0.00091 | 0.10305 |
| PKH_080770 | 0.10346 | 0.02958 | -0.1121 | -0.1031 | -0.0423 | 0.12149 | 0.14131 |
| PKH_052650 | -0.2902 | -0.196  | -0.1953 | 0.03086 | -0.2913 | -0.5109 | -0.8683 |
| PKH_125800 | 0.38946 | 0.25812 | 0.47982 | 0.86411 | 0.66359 | 0.27513 | -0.232  |
| PKH_080750 | -0.8284 | -0.1749 | 0.06354 | 0.1909  | 0.06004 | -0.0115 | 0.32382 |
| PKH_114550 | -1.4442 | -1.9119 | -1.4232 | -0.1183 | 0.49975 | 0.8241  | -0.2803 |
| PKH_120110 | 0.7131  | 0.67382 | 0.97064 | 0.94319 | 0.75628 | 0.50329 | 0.31663 |
| PKH_010740 | -0.4065 | -0.7943 | -0.4315 | -0.4785 | -0.3957 | -0.3583 | -0.7342 |
| PKH_122310 | 0.13928 | 0.37314 | 0.23731 | 0.09094 | 0.11413 | -0.0021 | -0.0343 |
| PKH_072720 | -0.1033 | -0.1431 | -1.0329 | -0.3879 | -0.5159 | -0.5015 | -1.4447 |
| PKH_122600 | 0.79713 | 0.58566 | 0.62625 | 0.53129 | 0.66827 | 0.43576 | 0.48478 |
| PKH_124290 | 0.48693 | 0.31608 | 0.23426 | 0.14607 | 0.33053 | 0.30516 | 0.52065 |
| PKH_082290 | 0.23006 | 0.22373 | 0.32265 | 0.46683 | 0.09025 | -0.0803 | -0.051  |
| PKH_092720 | -0.215  | -0.3634 | -0.5805 | -0.8229 | -1.0655 | -0.7527 | -0.3076 |
| PKH_082810 | 0.70635 | 0.94652 | 1.02851 | 0.8631  | 0.46757 | 0.31737 | 0.48185 |
| PKH_081550 | 0.05263 | 0.10297 | 0.4892  | 0.05354 | 0.35736 | 0.11014 | -0.5804 |
| PKH_000650 | -0.3549 | -0.5138 | -0.3817 | -0.5249 | -0.5743 | -0.6983 | -1.524  |
| PKH_041720 | -0.0783 | -0.0564 | -0.2325 | -0.3402 | -0.5592 | -0.4197 | -0.424  |
| PKH_112630 | 0.83429 | 1.04047 | 0.92424 | 0.49645 | -0.0896 | -0.3145 | -0.3044 |
| PKH_133510 | 0.3038  | 0.46955 | 0.44696 | 0.01402 | -0.1534 | -0.1958 | -0.2967 |
| PKH_124940 | 0.15754 | 0.0695  | 0.15669 | 0.27518 | 0.23891 | 0.24788 | -0.9623 |
| PKH_083250 | -0.2498 | 0.11892 | 0.29692 | 0.66546 | 0.51711 | 0.37773 | 0.20383 |
| PKH_100380 | -1.0003 | -1.6772 | -1.3464 | -0.2592 | 0.85413 | 1.02014 | 1.10134 |
| PKH_102920 | -0.13   | -0.2286 | -0.4382 | -0.6048 | -0.4108 | -0.6531 | -0.4004 |
| PKH_113100 | -0.1508 | -0.0045 | -0.002  | -0.0068 | -0.079  | -0.1586 | -0.1586 |
| PKH_070860 | -0.1403 | 0.05604 | 0.36475 | 0.359   | 0.23551 | 0.12223 | -0.0843 |
| PKH_092520 | -0.5374 | -0.5047 | -0.2978 | -0.1722 | -0.1495 | -0.2432 | -0.7582 |
| PKH_070440 | 0.24899 | -0.029  | -0.1584 | -0.0167 | 0.02951 | 0.00223 | 0.06543 |
| PKH_126640 | 1.08374 | 1.20814 | 0.93203 | 0.73979 | 0.42945 | 0.20922 | 0.04939 |
| PKH_144300 | -1.6397 | -1.5985 | -1.6617 | -1.8357 | -1.5826 | -1.3661 | -1.4488 |
| PKH_051220 | -0.3842 | -0.4263 | -0.5986 | -0.7125 | -0.7114 | -0.6397 | -1.0773 |
| PKH_090250 | -1.2222 | -1.0115 | -0.998  | -0.5016 | -0.6158 | -0.1872 | -0.3273 |
| PKH_140230 | 0.98285 | 0.91135 | 1.11654 | 1.00167 | 1.17511 | 1.10986 | 0.91035 |
| PKH_130920 | -0.6937 | -0.6018 | -0.8103 | -0.7101 | -0.5602 | -0.8173 | -2.0094 |
| PKH_051981 | 0.68824 | 0.67535 | 0.85106 | 0.95269 | 0.83094 | 0.59861 | 0.59247 |
| PKH_050180 | -0.0138 | -0.0855 | -0.1613 | -0.1156 | -0.3099 | -0.3495 | -0.5217 |
| PKH_140910 | -0.3317 | -0.5042 | -0.4794 | -0.1886 | 0.26654 | 0.92595 | 1.11454 |

|            |         |         |         |         |         |         |         |
|------------|---------|---------|---------|---------|---------|---------|---------|
| PKH_132370 | -0.0616 | -0.0711 | 0.18804 | 0.16433 | 0.11557 | 0.09684 | 0.23795 |
| PKH_093240 | -0.001  | -0.1094 | -0.2579 | -0.0169 | -0.1938 | -0.2232 | -0.3889 |
| PKH_091150 | 0.13001 | 0.03595 | 0.06682 | 0.02934 | 0.10363 | 0.10576 | -0.0193 |
| PKH_070630 | 0.27857 | 0.18488 | -0.1863 | -0.4185 | -0.5307 | -0.8179 | -0.4804 |
| PKH_110260 | -0.1621 | 0.03299 | 0.1065  | 0.06175 | 0.35637 | 0.30644 | 0.20133 |
| PKH_121100 | 0.24433 | 0.74935 | 1.12037 | 1.21859 | 1.0673  | 0.46608 | -0.2668 |
| PKH_134180 | 0.08166 | 0.09032 | 0.30412 | 0.42117 | 0.46205 | 0.42039 | 0.26146 |
| PKH_051810 | -0.3526 | -0.3602 | -0.387  | -0.0966 | -0.0419 | 0.064   | -0.1881 |
| PKH_126220 | 0.24827 | 0.18051 | 0.44392 | 0.41143 | 0.50622 | 0.51193 | 0.53738 |
| PKH_061590 | -0.094  | 0.18557 | 0.22747 | 0.35541 | -0.1234 | -0.3159 | -0.1133 |
| PKH_090750 | 0.43854 | 0.30274 | 0.06346 | 0.06595 | 0.17388 | 0.28855 | 0.36835 |
| PKH_122010 | 0.4442  | 0.37898 | 0.03138 | -0.0928 | -0.5257 | -0.3874 | 0.28776 |
| PKH_143980 | -0.3457 | -0.2226 | -0.2158 | 0.00269 | -0.1198 | -0.0125 | -0.4714 |
| PKH_133190 | -1.2907 | -0.9449 | -0.7844 | -0.9482 | -1.5527 | -1.7153 | -2.5234 |
| PKH_082650 | 0.0461  | -0.11   | 0.03986 | 0.14463 | -0.0098 | 0.01083 | -0.1672 |
| PKH_010780 | 0.34332 | 0.53818 | -0.1346 | -0.3663 | -0.6456 | -0.5637 | -0.2497 |
| PKH_081290 | -0.3203 | -0.4223 | -0.5095 | -0.5185 | -0.0731 | 0.0686  | 0.00057 |
| PKH_060800 | -0.197  | -0.47   | -0.5224 | -0.2329 | -0.0437 | 0.07004 | 0.10189 |
| PKH_030580 | -0.2237 | 0.06947 | 0.08771 | 0.35306 | -0.0994 | -0.1338 | -0.4556 |
| PKH_110530 | -0.5619 | -0.5884 | -0.833  | -0.6846 | -0.6956 | -1.1193 | -0.8931 |
| PKH_030510 | -1.0629 | -0.943  | -0.8328 | -0.7924 | -0.5893 | -1.112  | -2.0844 |
| PKH_062260 | -0.1884 | -0.3056 | -0.4249 | -0.5689 | -0.4544 | 0.09734 | 0.52757 |
| PKH_051600 | -1.2103 | -1.189  | -1.311  | -1.1429 | -1.2903 | -1.4224 | -3.1062 |
| PKH_144440 | -1.4538 | -1.4629 | -1.2494 | -1.0937 | -0.8205 | -0.4212 | -0.7543 |
| PKH_061460 | 0.12257 | 0.13609 | -0.0564 | 0.07011 | -0.0207 | 0.20863 | 0.81932 |
| PKH_072310 | -0.5043 | -0.6636 | -0.788  | -1.0208 | -1.0699 | -1.1171 | -1.2175 |
| PKH_102510 | 0.35806 | 0.07265 | 0.06259 | 0.2519  | 0.1465  | 0.27664 | 0.00413 |
| PKH_072940 | 0.60734 | 0.4869  | 0.30069 | 0.14316 | 0.25956 | 0.49033 | 0.73405 |
| PKH_125410 | -0.0353 | 0.15243 | 0.23055 | 0.09104 | -0.0243 | -0.2433 | -0.2065 |
| PKH_133030 | 0.23803 | 0.19195 | 0.19707 | -0.0142 | -0.0958 | -0.0803 | 0.26812 |
| PKH_011340 | -0.0926 | -0.8876 | -1.4096 | -1.8081 | -0.4411 | 0.53336 | 0.71737 |
| PKH_073220 | -0.5122 | -0.6525 | -0.849  | -0.9687 | -0.9519 | -0.8831 | -0.9671 |
| PKH_130930 | 0.37647 | 0.66054 | 0.5092  | 0.21304 | -0.2561 | -0.6201 | -0.8874 |
| PKH_080180 | -0.0121 | 0.30014 | 0.33554 | 0.55605 | 0.38165 | 0.62043 | 0.30596 |
| PKH_102760 | 0.8233  | 0.95194 | 1.13093 | 0.83193 | 0.78477 | 0.60381 | 0.36809 |
| PKH_050830 | -0.3006 | -0.0417 | -0.0751 | -0.0715 | -0.0419 | -0.2561 | -0.0802 |
| PKH_114580 | 0.18384 | -0.0276 | -0.2507 | -0.2758 | -0.343  | -0.1531 | -0.3947 |
| PKH_030550 | 0.20645 | 0.26617 | 0.2109  | 0.03233 | -0.0026 | -0.2287 | -0.0295 |
| PKH_146390 | 0.45385 | 0.65928 | 0.83145 | 0.40194 | 0.31748 | 0.39207 | 0.54353 |
| PKH_061310 | -0.9886 | -0.7026 | -0.6562 | -0.324  | -0.6613 | -0.6084 | -0.5992 |
| PKH_082920 | -0.1077 | -0.2664 | -0.2091 | 0.07859 | -0.022  | -0.2181 | -1.6369 |
| PKH_020570 | 0.83249 | 0.30902 | -0.3544 | -0.4659 | -0.4842 | 0.45032 | 1.12317 |
| PKH_114850 | 0.18868 | -0.165  | -0.4687 | -0.662  | -0.7406 | -0.4531 | 0.13733 |
| PKH_100370 | -0.0667 | 0.03283 | -0.2163 | -0.0331 | -0.0229 | -0.2387 | -0.3611 |
| PKH_100790 | -0.42   | -0.3569 | -0.4651 | -0.5339 | -0.8122 | -0.8731 | -0.7824 |
| PKH_144250 | 0.62997 | 0.63373 | 0.92    | 0.78003 | 0.63604 | 0.66167 | 0.42906 |
| PKH_102640 | 0.29576 | 0.20348 | 0.36079 | 0.31304 | 0.53276 | 0.52029 | 0.38403 |
| PKH_132950 | 0.63194 | 0.84028 | 0.59668 | 0.35833 | 0.45612 | 0.44242 | 0.77073 |
| PKH_121460 | 0.3138  | 0.48263 | 0.36335 | 0.29378 | 0.01826 | -0.2591 | -0.1843 |
| PKH_020450 | -0.0331 | -0.67   | -1.0962 | -0.7707 | 0.62228 | 1.25142 | 1.91901 |
| PKH_144880 | -0.2266 | -0.5275 | -0.4754 | -0.4171 | -0.4286 | -0.2998 | -0.5201 |
| PKH_020330 | -0.4209 | -0.0545 | -0.1982 | -0.063  | -0.3381 | -0.5228 | -0.8746 |
| PKH_082660 | -0.2985 | 0.02155 | -0.17   | -0.2606 | -0.3044 | -0.5843 | -0.4845 |
| PKH_140680 | -0.1971 | -0.5097 | -0.2783 | -0.1004 | 0.26693 | 0.41694 | 0.6431  |
| PKH_122050 | -0.5769 | -0.4675 | -0.6979 | -0.7714 | -0.6425 | -0.4169 | -0.405  |
| PKH_123840 | 0.39192 | 0.33889 | 0.43684 | 0.23436 | -0.0693 | 0.22827 | 0.53504 |
| PKH_060080 | 0.57339 | 0.32089 | -0.6096 | -1.1579 | -0.8949 | 0.34546 | 0.96566 |
| PKH_145790 | 0.59419 | 0.46899 | 0.49325 | 0.40281 | 0.22184 | 0.32609 | 0.94969 |
| PKH_080740 | -0.1439 | -0.0041 | -0.1596 | -0.058  | 0.00369 | -0.1141 | -0.6433 |
| PKH_146430 | 0.233   | 0.22777 | 0.4716  | 0.46042 | 0.49671 | 0.27366 | -0.0068 |
| PKH_131550 | -0.724  | -0.6587 | -0.3892 | -0.1194 | -0.3929 | -0.3638 | -0.212  |
| PKH_061190 | 0.47044 | 0.54471 | 0.48453 | 0.32055 | -0.0043 | -0.1263 | -0.3087 |
| PKH_051710 | -1.1624 | -0.9255 | -1.0233 | -1.032  | -1.134  | -1.3316 | -1.5374 |



|            |         |         |         |         |         |         |         |
|------------|---------|---------|---------|---------|---------|---------|---------|
| PKH_102660 | -0.414  | -0.531  | -0.8635 | -0.1543 | -0.3681 | -0.3755 | -1.5964 |
| PKH_092900 | 0.65182 | 0.49697 | 0.41073 | 0.1422  | -0.0372 | -0.1143 | -0.2818 |
| PKH_041170 | 0.12263 | 0.02287 | -0.0788 | -0.0863 | -0.1673 | -0.1579 | -0.1049 |
| PKH_080360 | -0.0934 | 0.03962 | -0.0506 | 0.02221 | -0.0965 | -0.0865 | 0.09455 |
| PKH_072020 | 0.2371  | 0.33726 | 0.18048 | 0.23878 | 0.0935  | -0.0778 | -0.0042 |
| PKH_060850 | 0       | 0       | 0       | 0.27155 | 0.06743 | 0       | -0.608  |
| PKH_132770 | 0.20048 | 0.39578 | 0.62684 | 0.19544 | 0.53455 | 0.51329 | 0.27793 |
| PKH_112160 | -0.415  | -0.8923 | -0.7839 | -0.951  | -0.7255 | -0.671  | -0.969  |
| PKH_126190 | 0.48935 | 0.6438  | 0.61838 | 0.70262 | 0.46043 | 0.23479 | 0.33496 |
| PKH_130030 | 0.19535 | 0.29357 | 0.34853 | 0.2595  | 0.28328 | -0.0731 | 0.27156 |
| PKH_126730 | 0.33816 | 0.23784 | 0.14649 | 0.19554 | 0.20139 | 0.13017 | 0.29498 |
| PKH_030920 | -0.265  | -0.6278 | -0.6925 | -0.8039 | -0.6916 | -0.7836 | -1.2803 |
| PKH_144270 | -0.5463 | -0.4931 | -0.5287 | -0.6375 | -0.5521 | -0.5628 | -0.2794 |
| PKH_126360 | -0.4741 | -0.5338 | 0.00558 | 0.45353 | 0.57193 | 0.73694 | 0.2587  |
| PKH_040580 | -0.0082 | -0.1742 | -0.2122 | -0.1159 | 0.20674 | 0.265   | -0.2198 |
| PKH_051610 | -0.2793 | 0.09638 | 0.14195 | 0.01997 | 0.06788 | 0.00409 | -0.504  |
| PKH_130950 | -0.283  | -0.2121 | -0.1522 | -0.3107 | -0.3453 | -0.2657 | -0.2158 |
| PKH_142900 | 0.30866 | 0.35969 | 0.60616 | 0.8194  | 0.59086 | 0.64612 | 0.28196 |
| PKH_100590 | 0.041   | 0.21295 | 0.34042 | 0.52275 | 0.33508 | 0.14605 | -0.0793 |
| PKH_082690 | 0.14036 | 0.10048 | 0.10771 | 0.25223 | 0.0805  | 0.04326 | -0.2947 |
| PKH_133790 | -0.0187 | 0.09384 | 0.06025 | -0.2811 | -0.2843 | -0.5091 | -0.5529 |
| PKH_062230 | 0.20352 | 0.42565 | 0.80949 | 0.65549 | 0.72215 | 0.67606 | 0.65656 |
| PKH_131040 | 0.58278 | 0.69566 | 0.62884 | 0.60764 | 0.67264 | 0.46368 | 0.76274 |
| PKH_060990 | -0.5225 | -0.5617 | -0.6696 | -0.8151 | -0.7789 | -0.7373 | -0.8079 |
| PKH_060480 | 0.32979 | 0.54483 | 0.59281 | 0.4912  | 0.45757 | 0.33902 | 0.16312 |
| PKH_111810 | -0.1853 | -0.3528 | -0.2216 | -0.0229 | 0.41526 | 0.44868 | 0.23882 |
| PKH_090930 | 0.06632 | 0.11206 | 0.42933 | 0.49475 | 0.37371 | 0.24903 | 0.50518 |
| PKH_091520 | -0.0954 | 0.34368 | 0.28754 | 0.52648 | 0.45852 | 0.43498 | 0.24385 |
| PKH_031660 | -0.4736 | -0.4565 | -0.6674 | -0.2774 | -0.4582 | -0.4991 | -2.0497 |
| PKH_030720 | 0.58565 | 0.45807 | 0.05523 | 0.19241 | 0.09643 | -0.2068 | -0.3257 |
| PKH_120800 | 0.00821 | -0.0925 | -0.3    | -0.1868 | -0.2179 | -0.1995 | -0.3947 |
| PKH_120700 | -0.4142 | -0.1005 | -0.2084 | -0.0435 | 0.04236 | -0.0802 | -0.209  |
| PKH_143800 | -0.056  | 0.00344 | -0.0899 | -0.0878 | 0.25103 | 0.10018 | -0.7395 |
| PKH_070430 | -0.4123 | -0.078  | -0.0105 | 0.07684 | -0.2242 | -0.3664 | -1.1958 |
| PKH_124650 | 0.48695 | 0.36993 | 0.43951 | 0.62341 | 0.50285 | 0.6315  | 0.3881  |
| PKH_133390 | 0.18615 | -0.0142 | -0.0222 | -0.0183 | 0.22616 | 0.29611 | 0.29785 |
| PKH_134490 | 0.75992 | 0.66535 | 0.75406 | 0.77968 | 0.47122 | 0.52338 | 0.55711 |
| PKH_080510 | 0.08885 | -0.0662 | 0.04475 | -0.152  | -0.1552 | -0.1693 | -0.1246 |
| PKH_125980 | -1.295  | -1.138  | -0.9055 | -0.832  | 0.01917 | 0.10513 | 0.1352  |
| PKH_031770 | -0.8642 | -0.7003 | -0.6816 | -0.5385 | -0.8033 | -0.6024 | -1.3142 |
| PKH_094420 | -0.3204 | -0.146  | -0.1652 | -0.1325 | -0.2518 | -0.1281 | -0.5307 |
| PKH_083370 | -0.519  | -0.2945 | -0.5272 | -0.8647 | -0.1834 | -0.3592 | -0.8575 |
| PKH_083120 | -0.217  | -0.4162 | -0.5318 | -0.5117 | -0.3484 | -0.7515 | -0.785  |
| PKH_090850 | -0.2818 | -0.1863 | -0.1617 | -0.2117 | -0.2332 | -0.1252 | -0.385  |
| PKH_124820 | 0.08185 | 0.342   | 0.76937 | 0.83283 | 0.58664 | 0.87184 | 0.39545 |
| PKH_114840 | 0.50457 | 0.20563 | 0.19372 | -0.1066 | -0.0978 | 0.34405 | 0.90689 |
| PKH_010120 | -1.5527 | -1.3139 | -1.4988 | -1.5714 | -1.7701 | -1.8795 | -3.7229 |
| PKH_111460 | -0.4946 | -0.4635 | -0.1792 | -0.4956 | -0.3641 | -0.2412 | -0.2814 |
| PKH_051420 | -0.774  | -1.1369 | -1.1201 | -0.5908 | 0.17628 | 0.62684 | 0.3704  |
| PKH_111900 | 0.1336  | 0.24346 | 0.47032 | 0.83908 | 0.54508 | 0.38198 | -0.0705 |
| PKH_100390 | 0.17603 | -0.082  | -0.1114 | 0.08148 | 0.48804 | 0.72616 | 0.4324  |
| PKH_133050 | -0.2389 | -0.2399 | -0.1254 | 0.15939 | 0.35739 | 0.56636 | 0.51799 |
| PKH_080730 | -0.3702 | -0.2771 | -0.3856 | -0.2906 | 0.03146 | 0.24912 | -0.4956 |
| PKH_132810 | -0.4289 | -0.3883 | -0.0451 | 0.14528 | 0.25852 | 0.13658 | 0.30058 |
| PKH_111060 | 0.07461 | 0.35372 | 0.41478 | 0.29757 | 0.07318 | 0.0143  | 0.08947 |
| PKH_132070 | 0.23168 | 0.33183 | 0.27374 | 0.58571 | 0.84689 | 0.58341 | 0.6896  |
| PKH_010750 | -1.3917 | -0.9698 | -1.03   | -1.1787 | -0.9253 | -0.993  | -1.7582 |
| PKH_040150 | 0.14008 | 0.10049 | 0.16158 | 0.17252 | 0.0681  | 0.12817 | 0.17665 |
| PKH_020900 | -0.5655 | -0.9745 | -0.7537 | -0.9478 | -0.5423 | -0.2701 | -0.2771 |
| PKH_090610 | -0.3405 | -0.327  | -0.3458 | -0.6156 | -0.54   | -0.6535 | -0.1639 |
| PKH_114530 | -0.2474 | -0.1015 | -0.0737 | -0.2241 | -0.1272 | -0.0456 | -1.2563 |
| PKH_132570 | 0.24613 | 0.3285  | 0.12794 | 0.4222  | 0.1418  | 0.05856 | -0.1715 |
| PKH_011540 | -0.9358 | -0.6964 | -0.9121 | -1.5422 | -0.8563 | -0.7937 | -1.3923 |

|            |         |         |         |         |         |         |         |
|------------|---------|---------|---------|---------|---------|---------|---------|
| PKH_031330 | -0.2889 | -0.1071 | -0.1008 | -0.1248 | 0.05082 | -0.0082 | 0.19858 |
| PKH_130240 | 0.93234 | 1.02458 | 1.12291 | 1.14555 | 0.82271 | 0.42194 | 0.28423 |
| PKH_091180 | 0.68496 | 0.83407 | 0.84087 | 0.63608 | 0.62759 | 0.32414 | 0.17815 |
| PKH_121170 | 0.10784 | -0.0668 | -0.603  | -1.0581 | -1.3565 | -1.5889 | -1.5926 |
| PKH_113470 | -0.5992 | -0.9856 | -0.9866 | -1.2731 | -0.7364 | -0.2266 | -0.3921 |
| PKH_011260 | -1.8316 | -1.9134 | -1.6353 | -1.1294 | -0.6668 | -0.4941 | -1.5268 |
| PKH_061120 | -0.245  | -0.1308 | -0.2694 | -0.4779 | -0.2498 | -0.2456 | -0.8268 |
| PKH_140500 | 0.39224 | -0.0054 | -0.235  | 0.09764 | 0.04028 | -0.2014 | 0.57841 |
| PKH_090300 | 0.87476 | 0.85968 | 0.98397 | 1.146   | 0.6624  | 0.4536  | 0.2231  |
| PKH_082270 | -0.3909 | -0.3078 | -0.4024 | -0.4679 | 0.33006 | 0.84032 | 0.65776 |
| PKH_101680 | 0.18376 | 0.20466 | 0.30914 | 0.57788 | 0.37326 | 0.39189 | 0.17186 |
| PKH_122640 | -0.2162 | -0.2213 | -0.1683 | -0.2752 | -0.195  | -0.1603 | -0.4189 |
| PKH_081340 | -0.0995 | 0.04688 | 0.11616 | 0.2397  | 0.2236  | 0.32459 | 0.00429 |
| PKH_082840 | 0.01672 | -0.0277 | 0.08817 | -0.0424 | 0.09733 | 0.02198 | -0.2681 |
| PKH_144010 | 0.46457 | 0.49918 | 0.44576 | 0.52762 | 0.15086 | 0.48061 | -0.0871 |
| PKH_121600 | -0.0152 | -0.0567 | 0.07405 | -0.1426 | 0.00977 | 0.54218 | 0.81558 |
| PKH_072600 | -0.3412 | -0.5134 | -0.6655 | -0.4204 | -0.4677 | -0.2786 | -0.3405 |
| PKH_021210 | 0.54059 | 0.80125 | 0.80817 | 0.63258 | 0.21102 | 0.03426 | -0.4583 |
| PKH_120280 | 0.45194 | 0.56713 | 0.4806  | 0.5079  | 0.17345 | 0.09311 | -0.2241 |
| PKH_062190 | -0.6109 | -0.5721 | -0.5546 | -0.4175 | -0.5233 | -0.334  | -0.418  |
| PKH_144900 | -0.3073 | -0.414  | -0.7255 | -0.7507 | -0.8942 | -0.9729 | -1.1896 |
| PKH_082300 | 0.78888 | 0.44109 | 0.06298 | -0.3919 | -0.2844 | 0.07311 | 0.8104  |
| PKH_113070 | 0.43327 | 0.50069 | 0.59396 | 0.49923 | 0.01022 | -0.1569 | -0.1759 |
| PKH_121390 | 0.94176 | 0.78082 | 0.5278  | 0.36511 | 0.27327 | 0.52779 | 0.83199 |
| PKH_052130 | -0.8458 | -0.7025 | -0.5419 | -0.5348 | -0.4387 | -0.3464 | -0.7429 |
| PKH_071290 | -0.1396 | -0.0156 | 0.09927 | 0.38378 | -0.0507 | -0.1365 | -0.6585 |
| PKH_041450 | -0.2828 | -0.4142 | -0.3405 | -0.4623 | -0.2935 | -0.2134 | -0.3263 |
| PKH_050770 | 0.07716 | -0.2974 | -0.2217 | -0.0956 | -0.0396 | -0.1022 | -0.6647 |
| PKH_126830 | -0.0699 | -0.0484 | 0.11564 | 0.20695 | 0.08224 | -0.0447 | -1.4181 |
| PKH_020060 | -0.1614 | -0.3934 | -0.5337 | -0.9755 | -0.6796 | -0.7359 | -0.042  |
| PKH_123350 | 0.41305 | 0.44842 | 0.69935 | 0.52244 | 0.5087  | 0.55492 | 0.36252 |
| PKH_140100 | 0.53717 | 0.82012 | 0.82806 | 1.06199 | 1.01814 | 0.66695 | 0.23822 |
| PKH_070930 | 0.22667 | 0.30731 | 0.25683 | 0.35696 | 0.24049 | 0.15478 | 0.16081 |
| PKH_122750 | 0.67095 | 1.00083 | 1.07131 | 1.51417 | 1.17883 | 0.93271 | 1.09797 |
| PKH_091470 | 0.46354 | 0.45229 | 0.14597 | 0.68367 | 0.41224 | 0.42374 | 0.46831 |
| PKH_113760 | 0.14625 | 0.25701 | 0.1494  | -0.0326 | 0.07564 | 0.04747 | -0.0437 |
| PKH_121570 | -0.1442 | -0.2341 | -0.2585 | -0.1806 | -0.2628 | -0.2768 | -1.7971 |
| PKH_146650 | 0.27854 | 0.21229 | 0.29168 | 0.24504 | 0.36614 | 0.29599 | 0.44901 |
| PKH_040920 | 0.73372 | 0.72116 | 0.62307 | 0.73276 | 0.54996 | 0.22943 | 0.31493 |
| PKH_040120 | 0       | -0.1277 | -0.5885 | -0.525  | -0.7775 | -0.9518 | -0.9564 |
| PKH_146480 | 1.11408 | 1.07796 | 1.06004 | 0.67227 | 0.82709 | 0.68014 | 0.72148 |
| PKH_110080 | 0.54075 | 0.58034 | 0.48644 | 0.65173 | 0.33053 | 0.20696 | 0.37108 |
| PKH_093070 | 0.58646 | 0.59352 | 0.31935 | 0.41129 | 0.24705 | 0.15956 | 0.55893 |
| PKH_093570 | -0.1092 | -0.1685 | -0.272  | -0.0016 | -0.0257 | -0.1486 | -0.1278 |
| PKH_111100 | -0.1779 | -0.1288 | 0.28816 | 0.32402 | 0.23159 | 0.49802 | 0.06158 |
| PKH_081140 | 0.20295 | 0.2707  | 0.23695 | 0.39175 | 0.24509 | 0.07381 | -0.4388 |
| PKH_120100 | 0.04441 | -0.3942 | -0.454  | -0.6916 | -0.3693 | 0.38093 | 0.74232 |
| PKH_011200 | -1.1532 | -1.0956 | -0.9686 | -0.7322 | -0.7801 | -1.0513 | -2.8361 |
| PKH_031840 | 0.52477 | 0.53559 | 0.49188 | 0.36931 | 0.01474 | -0.1554 | -0.1471 |
| PKH_101940 | -0.2075 | -0.0537 | -0.0916 | -0.0244 | -0.0852 | 0.16993 | -0.2594 |
| PKH_041640 | -0.6186 | -0.3112 | -0.0921 | -0.0275 | 0.24979 | 0.054   | -0.5046 |
| PKH_011730 | 0.94284 | 0.71275 | 0.5937  | 0.19153 | -0.1029 | -0.0961 | 0.61409 |
| PKH_061060 | 0.17027 | 0.09709 | -0.0108 | -0.1191 | -0.1307 | -0.1491 | -0.1649 |
| PKH_072470 | 0.41754 | 0.4809  | 0.56826 | 0.75343 | 0.46819 | 0.59499 | 0.64469 |
| PKH_090640 | -0.0622 | -0.2077 | -0.3875 | -0.4886 | -0.5649 | -0.3894 | 0.18059 |
| PKH_142240 | -0.4766 | -0.2547 | 0.00091 | -0.0017 | 0.03872 | -0.0462 | -0.2074 |
| PKH_051740 | 0.90874 | 1.06317 | 1.05958 | 0.61841 | 0.67368 | 0.10032 | -0.5128 |
| PKH_133530 | -0.8464 | -1.2378 | -0.5749 | -0.3529 | -0.5749 | -0.2748 | -0.7554 |
| PKH_010210 | -0.2168 | -0.5058 | -0.7791 | -0.613  | -0.404  | -0.409  | -1.0418 |
| PKH_134430 | -0.1126 | -0.1393 | 0.20695 | 0.11395 | 0.45753 | 0.62322 | 0.41157 |
| PKH_071100 | 0.4917  | 0.54214 | 0.47208 | 0.40989 | 0.41152 | 0.15469 | 0.26241 |
| PKH_101150 | -0.5447 | -0.6887 | -0.5235 | -0.5943 | -0.7136 | -0.5719 | -0.5787 |
| PKH_123070 | 0.26707 | 0.28581 | 0.33572 | -0.0024 | 0.2786  | 0.29443 | 0.26743 |

|            |         |         |         |         |         |         |         |
|------------|---------|---------|---------|---------|---------|---------|---------|
| PKH_100330 | 0.30738 | 0.26462 | 0.22783 | 0.22358 | 0.3691  | 0.00668 | 0.29982 |
| PKH_093640 | 0.34178 | 0.39082 | 0.35601 | 0.29994 | 0.23932 | 0.41632 | 0.50995 |
| PKH_110280 | -0.005  | -0.0286 | -0.4234 | -0.0987 | -0.3249 | -0.417  | -0.9472 |
| PKH_121070 | -0.5574 | -0.5495 | -0.399  | -0.2055 | -0.0094 | 0.10052 | -0.2771 |
| PKH_070880 | 0.50476 | 0.26281 | 0.09574 | 0.24733 | 0.23776 | -0.0941 | -1.0685 |
| PKH_061080 | -0.3611 | -0.1956 | -0.2035 | -0.3475 | -0.2651 | -0.3368 | -0.2124 |
| PKH_071600 | 0       | -0.2773 | -0.1299 | -0.4118 | -0.1259 | -0.2763 | 0.11313 |
| PKH_140700 | 0.28092 | 0.6246  | 0.9587  | 1.21498 | 1.03379 | 0.69002 | 0.57764 |
| PKH_102030 | -0.8229 | -0.6084 | -0.4844 | -0.517  | -0.8366 | -0.9495 | -0.9014 |
| PKH_091460 | -0.0742 | -0.0986 | -0.0903 | -0.2353 | 0.07606 | -0.0674 | -0.0522 |
| PKH_091480 | -0.4065 | -0.514  | -0.5162 | -0.1932 | -0.0181 | 0.28512 | 0.40741 |
| PKH_094480 | 0.27606 | 0.34908 | 0.49831 | 0.41865 | 0.46032 | 0.40031 | 0.8034  |
| PKH_124320 | 0.08087 | 0.00924 | 0.08449 | 0.16834 | 0.14779 | 0.27003 | -0.0789 |
| PKH_146130 | 0.23811 | 0.33491 | 0.27931 | 0.38466 | 0.10069 | 0.03264 | 0.27355 |
| PKH_130555 | -0.12   | -0.2055 | -0.0585 | -0.1757 | 0.08851 | -0.0491 | -0.3479 |
| PKH_083040 | 0.17897 | 0.15508 | 0.37872 | 0.5996  | 0.47745 | 0.42055 | 0.61857 |
| PKH_011610 | 0.26635 | 0.74221 | 0.43925 | 0.85612 | 0.11648 | -0.0951 | -0.274  |
| PKH_040770 | 0.0506  | 0.11278 | 0.45157 | 0.2346  | 0.16449 | 0.07873 | -0.1733 |
| PKH_144040 | 0.38528 | 0.28284 | 0.23129 | 0.05622 | 0.35573 | 0.16433 | -0.8226 |
| PKH_092270 | 0.50389 | 0.47614 | 0.39197 | 0.56479 | 0.38884 | -0.0432 | -0.3736 |
| PKH_060570 | -0.7535 | -0.4616 | -0.6771 | -0.6416 | -0.5613 | -0.7526 | -0.8631 |
| PKH_111370 | -0.0136 | 0.00121 | -0.0267 | -0.1018 | -0.101  | -0.0743 | -0.2474 |
| PKH_111430 | -0.2196 | -0.0959 | -0.1143 | -0.2911 | -0.4413 | -0.3465 | -0.477  |
| PKH_062330 | 0.31226 | 0.14607 | 0.03334 | -0.0212 | 0.10544 | 0.15811 | 0.50589 |
| PKH_092410 | -0.4059 | -0.4571 | -0.5717 | -0.7583 | -0.8035 | -0.6519 | -0.4713 |
| PKH_120690 | -0.2959 | -0.1654 | 0.01706 | -0.3399 | 0.0497  | -0.0638 | 0.47536 |
| PKH_123490 | 0.82153 | 0.96675 | 1.27622 | 1.238   | 1.03976 | 0.91232 | 0.85176 |
| PKH_051040 | -1.1939 | -1.3691 | -0.9855 | -0.8299 | -0.6692 | -0.5838 | -0.5924 |
| PKH_132640 | -0.0279 | -0.1956 | -0.2098 | -0.266  | -0.4259 | -0.4095 | -0.54   |
| PKH_130800 | -1.8441 | -1.628  | -1.3437 | -1.8668 | -1.1038 | -1.0576 | -1.8559 |
| PKH_093190 | 0.71697 | 0.69577 | 0.23359 | -0.2158 | -0.3456 | -0.7585 | -1.0511 |
| PKH_052730 | -0.31   | -0.2748 | -0.9377 | -0.2715 | -1.1564 | -0.8849 | -0.9377 |
| PKH_041300 | -0.1512 | -2.0799 | -0.1471 | 0.2057  | -0.1152 | -0.1545 | 0.58957 |
| PKH_120740 | 0.36007 | 0.16156 | -0.0452 | -0.5308 | -0.5363 | -0.3843 | -0.1416 |
| PKH_124810 | 0.59573 | 0.61341 | 0.39399 | 0.43706 | 0.34712 | 0.18741 | 0.59428 |
| PKH_140850 | 0.89595 | 1.01124 | 1.02462 | 0.91807 | 0.73346 | 0.34334 | 0.3575  |
| PKH_112400 | -0.0712 | -0.0587 | 0.06477 | 0.1792  | -0.1675 | -0.3729 | -0.16   |
| PKH_082530 | 0.17084 | -0.2099 | -0.3396 | -0.244  | -0.0763 | -0.0231 | 0.64472 |
| PKH_072160 | 0.03765 | -0.0296 | -0.1043 | 0.27464 | 0.21856 | 0.60489 | 0.44389 |
| PKH_040960 | 0.08537 | -0.0068 | 0.04147 | 0.1747  | -0.0391 | -0.0153 | -0.3091 |
| PKH_121710 | 0.26341 | 0.42173 | 0.71799 | 0.57178 | 0.50917 | 0.29122 | 0.17619 |
| PKH_132010 | 0.03051 | -0.4757 | -0.485  | 0.25422 | 0.96187 | 1.2276  | 1.33897 |
| PKH_050310 | -0.1385 | -0.4925 | -0.1942 | -0.0909 | -0.118  | -0.2578 | -0.2474 |
| PKH_080550 | 0.34036 | 0.45081 | 0.35261 | 0.12774 | 0.24092 | 0.34417 | 0.22568 |
| PKH_091130 | -0.2482 | -0.25   | -0.1688 | -0.3497 | -0.2594 | -0.0679 | 0.16603 |
| PKH_133570 | 0.83664 | 0.84017 | 0.67196 | 0.2188  | -0.3227 | -0.8809 | -0.6414 |
| PKH_051150 | -0.7946 | -0.7301 | -0.5678 | -0.4787 | -0.1169 | -0.333  | -0.4556 |
| PKH_072150 | -0.2009 | -0.0327 | 0.01378 | 0.17941 | -0.0864 | -0.1264 | -0.4534 |
| PKH_132510 | 0.72228 | 0.53807 | 0.32828 | 0.06026 | 0.17533 | 0.36111 | 0.43834 |
| PKH_125010 | 0.03787 | 0.42376 | 0.68939 | 0.73483 | 1.181   | 1.24111 | 1.30261 |
| PKH_114120 | 0.00842 | -0.0357 | 0.03596 | 0.03989 | -0.0382 | -0.1899 | -0.2948 |
| PKH_121900 | -0.1488 | -0.1609 | 0.06947 | -0.1165 | -0.1423 | -0.2622 | -0.6912 |
| PKH_080190 | 0.43787 | 0.47701 | 0.56511 | 0.36581 | 0.48879 | 0.20025 | 0.18681 |
| PKH_072010 | 0.25241 | 0.64956 | 0.34596 | 0.51344 | 0.18021 | 0.17949 | 0.04573 |
| PKH_133760 | -0.0508 | 0.16595 | 0.25062 | 0.14647 | 0.04998 | 0.12668 | 0.00999 |
| PKH_100470 | 0.1026  | -0.1215 | 0.13049 | 0.0975  | -0.1378 | -0.0528 | -1.3253 |
| PKH_132320 | -0.2616 | 0.21432 | 0.7015  | 0.96932 | 0.81254 | 0.55586 | 0.61845 |
| PKH_122150 | -0.5595 | -0.341  | -0.4068 | -0.1379 | -0.394  | -0.3182 | -1.5761 |
| PKH_072790 | -0.442  | -0.231  | -0.4068 | -0.3728 | -0.4297 | -0.5987 | -0.4047 |
| PKH_113400 | 0.44455 | 0.51087 | 0.36315 | 0.39429 | 0.02678 | 0.04247 | 0.45835 |
| PKH_080230 | -0.1449 | -0.9575 | -1.6277 | -1.4669 | 0.29348 | 1.21685 | 1.52281 |
| PKH_141460 | 1.01454 | 0.72532 | 0.93046 | 0.6719  | 0.9447  | 0.62383 | 0.97032 |
| PKH_102220 | -0.4511 | -0.4118 | -0.3836 | -0.5022 | -0.4019 | -0.5985 | -1.4974 |

|            |         |         |         |         |         |         |         |
|------------|---------|---------|---------|---------|---------|---------|---------|
| PKH_031520 | -0.7233 | -0.4659 | -0.3509 | -0.0047 | -0.2282 | -0.2365 | -0.3858 |
| PKH_111830 | -0.3414 | -0.1654 | -0.2874 | -0.2726 | -0.1991 | -0.1855 | 0.03712 |
| PKH_123090 | -0.3243 | -0.3086 | -0.0982 | 0.17646 | 0.23752 | 0.23924 | 0.41662 |
| PKH_132890 | -0.4248 | -0.587  | -0.3332 | -0.5543 | -0.6303 | -0.2339 | -0.2814 |
| PKH_131240 | -0.1569 | -0.022  | -0.0546 | -0.1779 | 0.3161  | 0.07847 | -0.4753 |
| PKH_052020 | -0.1708 | -0.272  | -0.6907 | -0.3097 | -0.5597 | -0.7127 | -2.0306 |
| PKH_060810 | -0.1345 | -0.337  | -0.4148 | -0.262  | 0.01767 | 0.11085 | -0.1722 |
| PKH_091420 | 0.7408  | 0.00236 | -0.3866 | -0.9349 | 0.14459 | 0.9071  | 1.33296 |
| PKH_040990 | -0.3127 | -0.0121 | 0.48252 | 0.40322 | 0.44576 | 0.39899 | 0.25274 |
| PKH_133950 | 0.1713  | 0.38436 | 0.20978 | 0.10862 | 0.04728 | 0.03063 | -0.0581 |
| PKH_130050 | 0.93484 | 0.88858 | 0.89677 | 0.6079  | 0.77225 | 0.5973  | 0.44314 |
| PKH_122840 | -0.7184 | -0.5135 | -0.4208 | -0.6392 | -0.6309 | -0.7355 | -1.1269 |
| PKH_090360 | 1.02484 | 0.9611  | 1.087   | 0.95967 | 0.75247 | 0.52833 | 0.53326 |
| PKH_081710 | -0.0116 | 0.08228 | 0.01132 | -0.0411 | -0.0871 | -0.0881 | -0.0931 |
| PKH_083260 | -0.3866 | -0.2057 | -0.2629 | -0.4275 | -0.3743 | -0.4749 | -0.4659 |
| PKH_070960 | 0.3082  | 0.23452 | 0.17617 | -0.0969 | 0.14056 | -0.0181 | -0.8246 |
| PKH_082450 | -0.541  | -0.3754 | -0.2649 | -0.3854 | -0.4847 | -0.4447 | -0.5722 |
| PKH_141860 | -0.2175 | 0.08372 | 0.42345 | 0.59561 | 0.96667 | -0.054  | 0.62428 |
| PKH_100050 | -0.1474 | -0.1873 | 0.05995 | -0.2581 | -0.2125 | -0.3518 | -0.2347 |
| PKH_020320 | -0.5393 | -0.4066 | -0.7725 | -0.7291 | -0.7147 | -1.083  | -1.3301 |
| PKH_050220 | -0.2569 | -0.2265 | -0.3134 | -0.2241 | 0.02651 | -0.1079 | -0.1519 |
| PKH_142470 | 0.30273 | 0.36156 | 0.34279 | 0.51866 | 0.31887 | 0.32778 | -1.2557 |
| PKH_114640 | 0.2409  | 0.22216 | 0.03203 | 0.03207 | -0.1905 | -0.251  | -0.514  |
| PKH_110230 | -0.0447 | -0.1705 | -0.1312 | -0.16   | -0.2281 | -0.2178 | -0.199  |
| PKH_144280 | 1.06068 | 0.94733 | 0.95938 | 0.9128  | 0.76491 | 0.50578 | 0.3643  |
| PKH_040160 | -0.2918 | -0.1911 | -0.2205 | -0.1419 | -0.5351 | -0.5019 | -0.3569 |
| PKH_146620 | 0.10194 | 0.23306 | 0.50505 | 0.78901 | 0.70158 | 0.68088 | 0.48764 |
| PKH_030710 | -1.004  | -0.8942 | -1.0223 | -0.8588 | -0.6618 | -0.9351 | -1.3957 |
| PKH_090020 | 0.26223 | 0.03546 | -0.2582 | -0.8822 | -0.8027 | -0.0637 | 0.71949 |
| PKH_010940 | -1.803  | -1.4802 | -1.9157 | -1.7281 | -1.7307 | -1.8949 | -3.6116 |
| PKH_100620 | 0.40293 | 0.12477 | 0.24648 | 0.08143 | 0.34608 | 0.25839 | 0.13739 |
| PKH_102600 | 0.47703 | 0.52424 | 0.59619 | 0.45765 | 0.18328 | 0.06027 | 0.05499 |
| PKH_131560 | 0.59199 | 0.48916 | 0.48915 | 0.45604 | 0.24011 | 0.08755 | -0.1335 |
| PKH_040600 | -0.2168 | -0.3152 | -0.6209 | -0.7935 | -0.8178 | -0.8308 | -0.7733 |
| PKH_061680 | -0.0976 | 0.01405 | -0.0084 | 0.10607 | 0.02412 | 0.0267  | -1.531  |
| PKH_125630 | 1.05502 | 0.67108 | 0.39335 | 0.63488 | 0.75436 | 1.14184 | 1.27229 |
| PKH_081020 | 0.28696 | 0.53853 | 0.55335 | 0.73966 | 0.23094 | 0.18873 | 0.55312 |
| PKH_060440 | 0.54573 | 0.74521 | 0.61104 | 0.41735 | 0.49454 | 0.39016 | 0.13525 |
| PKH_071380 | -0.307  | 0.13286 | 0.09305 | 0.16086 | 0.14502 | 0.25922 | -0.4347 |
| PKH_142180 | 0.46224 | 0.46509 | 0.45043 | 0.35996 | 0.28971 | 0.16802 | 0.18547 |
| PKH_093500 | 0.19031 | -0.0198 | -0.084  | -0.063  | 0.67476 | 0.626   | 0.641   |
| PKH_101880 | -1.6953 | -1.6945 | -1.7616 | -1.7148 | -1.7645 | -1.6161 | -1.0732 |
| PKH_111170 | 0.59796 | 0.48538 | 0.37331 | 0.25855 | 0.20249 | 0.10224 | 0.30004 |
| PKH_083350 | -0.4637 | -0.58   | -0.9633 | -1.1625 | -1.23   | -1.2979 | -1.1845 |
| PKH_110900 | 0.23135 | 0.39076 | 0.65779 | 0.79405 | 0.70012 | 0.58124 | 0.61278 |
| PKH_080490 | 0.89724 | 0.95295 | 0.73011 | 0.54659 | 0.42065 | 0.30894 | 1.00921 |
| PKH_146850 | 1.04879 | 0.91125 | 1.12368 | 0.78646 | 0.89542 | -0.1766 | 0.05654 |
| PKH_071810 | 0.04689 | 0.04478 | -0.0286 | 0.00538 | -0.2602 | -0.2197 | -0.5369 |
| PKH_112530 | 1.1044  | 1.64294 | 2.07119 | 2.0985  | 1.54712 | 1.04622 | 0.28605 |
| PKH_010420 | -0.9358 | -0.7984 | -0.9537 | -1.1222 | -1.1561 | -1.2022 | -1.2222 |
| PKH_102930 | -0.2569 | -0.2558 | -0.495  | -0.2976 | -0.1513 | 0.00807 | -0.1408 |
| PKH_081310 | 0.24273 | 0.56563 | 0.84568 | 1.0814  | 1.12208 | 0.96815 | 0.55496 |
| PKH_061210 | 0.53763 | 0.46392 | 0.24493 | 0.27488 | 0.16894 | 0.20834 | 0.27191 |
| PKH_145910 | -0.1217 | -0.0286 | -0.1665 | -0.1305 | -0.2986 | -0.2896 | -0.2585 |
| PKH_120410 | 0.3546  | 0.72844 | 0.32386 | 0.5259  | 0.18837 | -0.0415 | 0.21718 |
| PKH_060620 | -0.3853 | -0.2866 | -0.1445 | -0.1017 | -0.1244 | -0.2696 | -0.2043 |
| PKH_113690 | 0.86913 | 1.29311 | 1.29608 | 1.05074 | 0.50326 | 0.28569 | 0.16643 |
| PKH_010790 | -1.9701 | -1.9742 | -1.9861 | -1.9908 | -1.7714 | -1.841  | -2.5259 |
| PKH_050590 | 0.14064 | 0.19935 | 0.14946 | 0.09342 | 0.12893 | 0.00101 | -0.1692 |
| PKH_081000 | -0.1038 | -0.3091 | -0.4284 | -0.1646 | -0.0785 | -0.2837 | -0.4406 |
| PKH_011630 | -0.6452 | -0.6512 | -0.2341 | 0.15428 | 0.14142 | 0.38869 | -0.0536 |
| PKH_091250 | 0.81076 | 0.71354 | 0.09299 | -0.2104 | -0.7863 | -0.9285 | -0.4677 |
| PKH_091190 | 0.35335 | 0.62383 | 0.50593 | 0.64289 | 0.66445 | 0.59952 | 0.27757 |

|            |         |         |         |         |         |         |         |
|------------|---------|---------|---------|---------|---------|---------|---------|
| PKH_114190 | -0.4478 | -0.4127 | -0.2693 | -0.2181 | -0.5122 | -0.3444 | -0.4041 |
| PKH_031690 | -0.3332 | -0.207  | -0.3773 | -0.1601 | -0.4137 | -0.3103 | -1.7547 |
| PKH_092670 | -0.4508 | -0.824  | -0.67   | -0.3039 | 0.0881  | 0.40727 | 0.06141 |
| PKH_051590 | -0.7657 | -0.674  | -0.6323 | -0.757  | -0.986  | -0.9534 | -1.2199 |
| PKH_083680 | -0.1924 | 0.04983 | 0.22738 | 0.74329 | 0.85383 | 0.66689 | 0.5231  |
| PKH_132500 | -0.0952 | 0.08981 | -0.2313 | -0.0986 | -0.5931 | -0.9219 | -0.763  |
| PKH_102910 | -0.2253 | -0.2957 | -0.3852 | -0.3676 | -0.4412 | -0.4062 | -0.538  |
| PKH_123720 | 0.40425 | 0.31614 | 0.20326 | 0.16681 | 0.36732 | 0.5909  | 0.87089 |
| PKH_120920 | 0.42246 | 0.32273 | 0.29605 | 0.41123 | 0.29164 | 0.15147 | -1.1711 |
| PKH_132550 | 0.71516 | 0.10581 | -0.2286 | -1.0245 | -0.8887 | -0.8521 | 0.06963 |
| PKH_145960 | -0.0834 | 0.02266 | 0.09833 | 0.18498 | 0.20725 | 0.1382  | 0.02542 |
| PKH_041040 | 0.03127 | 0.15508 | 0.3191  | 0.37608 | 0.33157 | 0.39611 | 0.13296 |
| PKH_050150 | 0.14006 | 0.78919 | 0.67084 | 1.1005  | 0.71639 | 0.32257 | 0.13077 |
| PKH_091540 | 0.50335 | 0.68909 | 0.47241 | 0.53273 | 0.33652 | 0.10383 | 0.34432 |
| PKH_124710 | -0.1319 | -0.1529 | -0.1083 | 0.07296 | -0.1405 | -0.3288 | -1.1807 |
| PKH_072660 | 0.67817 | 0.54907 | 0.37529 | 0.30003 | 0.46366 | 0.27447 | 0.37015 |
| PKH_070530 | -0.2226 | -0.2037 | -0.384  | -0.3846 | -0.3959 | -0.5235 | -0.9108 |
| PKH_083070 | 0.1205  | 0.13964 | 0.07961 | 0.02912 | 0.05793 | -0.0593 | -1.3087 |
| PKH_146970 | 0.73327 | -0.044  | -0.5354 | -0.6101 | 0.99574 | 1.82603 | 2.14793 |
| PKH_140090 | 0.42901 | 0.28417 | 0.15786 | 0.35054 | 0.15971 | 0.16472 | -0.8725 |
| PKH_051370 | -0.1265 | 0.112   | -0.1843 | 0.04513 | -0.254  | -0.5307 | -0.75   |
| PKH_122990 | 0.50001 | 0.41325 | 0.52208 | 0.47269 | 0.43619 | 0.39191 | 0.2617  |
| PKH_060610 | -0.4176 | -0.4286 | -0.4541 | -0.4239 | -0.4554 | -0.4451 | -0.7363 |
| PKH_141900 | 0.4691  | 0.44578 | 0.34757 | 0.72492 | 0.66845 | 0.52735 | 0.48129 |
| PKH_144620 | 0.5319  | 0.61093 | 0.2904  | 0.26179 | -0.3216 | -0.6651 | -0.6777 |
| PKH_142540 | 0.56098 | 0.50813 | 0.51807 | 0.69712 | 0.84998 | 1.1848  | 1.35654 |
| PKH_061200 | -1.8061 | -1.7434 | -1.4886 | -1.0321 | -0.914  | -0.6087 | -0.2617 |
| PKH_130090 | 0.71661 | 0.88398 | 0.84654 | 1.02005 | 0.85836 | 0.44225 | 0.66005 |
| PKH_122280 | -0.1305 | -0.1855 | -0.077  | -0.0746 | -0.2956 | -0.1161 | -1.4988 |
| PKH_070470 | 0.02724 | -0.1053 | 0.06169 | 0.67915 | 0.65808 | 0.67055 | 0.98362 |
| PKH_113520 | -0.4938 | -0.7479 | -0.1804 | 0.27461 | 0.30804 | 0.49713 | 0.11387 |
| PKH_072560 | 0.33816 | 0.54791 | 0.77161 | 0.82996 | 0.66575 | 0.44268 | 0.47268 |
| PKH_052790 | 0.64335 | 0.50635 | -0.0051 | -0.5231 | -0.2671 | 0.56821 | 1.32132 |
| PKH_141200 | 0.5874  | 0.26592 | 0.35589 | 0.15542 | 0.2782  | 0.22711 | 0.45044 |
| PKH_134470 | -0.452  | -0.2988 | -0.2472 | -0.0863 | -0.0504 | 0.02956 | -0.4262 |
| PKH_090470 | -0.1734 | -0.1389 | 0.13704 | 0.1847  | 0.06962 | 0.15662 | -1.1564 |
| PKH_080090 | -0.1387 | -0.2288 | -0.1757 | -0.0774 | -0.1179 | 0.03778 | -0.1355 |
| PKH_083620 | -0.3751 | -0.4937 | -0.2903 | -0.4358 | -0.1542 | -0.1218 | -0.1336 |
| PKH_133980 | 0.211   | 0.1764  | 0.17149 | -0.0745 | -0.2495 | -0.0775 | 0.12267 |
| PKH_050360 | 0.15103 | -0.0851 | -0.2748 | -0.4415 | -0.2433 | -0.1282 | 0.2385  |
| PKH_111600 | 0.10748 | 0.10369 | -0.1055 | 0.10031 | -0.0683 | -0.314  | -0.2116 |
| PKH_146550 | 0.13653 | -0.1931 | -0.0384 | -0.1972 | -0.0648 | -0.1581 | 0.10997 |
| PKH_100320 | -0.8571 | -1.0604 | -0.8442 | -0.9612 | -1.0052 | -0.8897 | -0.4898 |
| PKH_121860 | -0.5788 | -0.541  | -0.1857 | -0.1012 | 0.06624 | 0.19133 | 0.04245 |
| PKH_083800 | 0.28663 | -0.0126 | -0.1894 | -0.2153 | -0.3153 | 0.43884 | 0.72575 |
| PKH_091170 | -0.1882 | -0.2255 | -0.0123 | 0.06537 | 0.13393 | -0.1123 | 0.01324 |
| PKH_080210 | -0.8583 | -1.3502 | -1.4678 | -0.8985 | -0.0291 | 0.78241 | 0.8911  |
| PKH_111640 | 0.22802 | 0       | -0.105  | -0.0029 | 0.18217 | 0.17327 | -0.1986 |
| PKH_143380 | -0.2945 | -0.5009 | -0.2229 | -0.322  | -0.1611 | -0.2275 | -0.9158 |
| PKH_010480 | -0.6758 | -0.9981 | -0.9249 | -1.6536 | -1.1099 | -1.164  | -1.0481 |
| PKH_121050 | 1.11367 | 1.21397 | 1.04362 | 1.12258 | 0.6103  | 0.39655 | 0.46131 |
| PKH_132610 | 0.16121 | 0.17749 | -0.1737 | -0.4301 | -0.6103 | -0.3149 | 0.1634  |
| PKH_143660 | -0.3222 | -0.2255 | -0.4093 | -0.3612 | -0.2401 | -0.5211 | -0.7525 |
| PKH_083790 | -0.208  | 0.06018 | -0.281  | -0.2066 | -0.5239 | -0.5066 | -1.6269 |
| PKH_050980 | 0.38624 | 0.513   | 0.66715 | 0.4273  | 0.76053 | 0.47797 | 0.02091 |
| PKH_133580 | 0.84411 | 0.72582 | 0.80388 | 0.71778 | 0.50701 | 0.50526 | 0.39394 |
| PKH_083150 | -0.9029 | -0.9954 | -1.2063 | -1.3842 | -1.1905 | -1.3197 | -1.4345 |
| PKH_083270 | 0.38011 | 0.60448 | 0.31706 | 0.18698 | 0.07244 | 0.00364 | -1.3526 |
| PKH_011290 | -0.0557 | -0.2853 | -0.2202 | -0.5927 | -0.3782 | -0.3277 | -0.169  |
| PKH_051840 | -0.3495 | -0.1073 | -0.1494 | -0.0844 | -0.1815 | 0.06471 | -0.4872 |
| PKH_052610 | -1.0737 | -0.8959 | -0.933  | -0.8061 | -0.8737 | -0.8064 | -0.5251 |
| PKH_081160 | 0.35076 | 0.58404 | 0.53349 | 0.50186 | 0.39999 | 0.38642 | 0.54376 |
| PKH_123430 | 0.19932 | 0.2352  | -0.0168 | -0.3135 | -0.1626 | 0.10818 | 0.44872 |

|            |         |         |         |         |         |         |         |
|------------|---------|---------|---------|---------|---------|---------|---------|
| PKH_141520 | -0.2385 | -0.0997 | -0.3242 | 0.05113 | -0.1621 | -0.1984 | -1.5328 |
| PKH_020490 | 0.67767 | 0.00468 | -0.6921 | -0.8705 | -0.2035 | 1.01813 | 1.77865 |
| PKH_094130 | -0.2799 | -0.5595 | -0.547  | -0.6779 | -0.9061 | -0.5587 | -0.063  |
| PKH_080560 | -0.296  | -0.2292 | -0.102  | 0.28354 | 0.45701 | 0.54514 | 1.14005 |
| PKH_071090 | 0.2027  | -0.1131 | -0.1464 | -0.2218 | -0.0552 | -0.1487 | 0.3242  |
| PKH_132130 | -0.4152 | -0.3416 | -0.2839 | -0.3514 | -0.5045 | -0.3292 | -1.6238 |
| PKH_102820 | -0.4478 | -0.3262 | 0.20299 | 0.2102  | 0.25304 | 0.31661 | 0.04313 |
| PKH_082930 | -1.2886 | -1.0931 | -1.1198 | -1.0297 | -0.8145 | -0.8483 | -1.0751 |
| PKH_031460 | -0.1758 | -0.0118 | 0.15899 | -0.0129 | -0.2341 | -0.4012 | -0.5647 |
| PKH_142660 | 0.5642  | 0.70704 | 0.94217 | 0.72624 | 0.17268 | 0.02218 | 0.06558 |
| PKH_010500 | -0.1267 | 0.13873 | -0.0765 | -0.4453 | -0.6332 | -1.0356 | -1.8328 |
| PKH_093510 | 1.06718 | 0.73612 | 0.56591 | 0.41    | 0.40386 | 0.16229 | 0.16088 |
| PKH_120720 | 0.28625 | -0.2176 | -0.2666 | -0.1926 | -0.3643 | 0.09257 | 0.64434 |
| PKH_126070 | 0.11242 | -0.2763 | -0.5141 | -0.5227 | -0.4254 | -0.0889 | 0.1915  |
| PKH_090390 | -0.0316 | -0.0836 | -0.0219 | -0.3097 | -0.2698 | -0.2886 | -0.4068 |
| PKH_110890 | 0.10591 | -0.0798 | -0.064  | -0.0245 | 0.3436  | 0.87698 | 1.18911 |
| PKH_142150 | 0.00267 | 0.04392 | -0.0354 | 0.03481 | 0.31449 | 0.26058 | 0.16565 |
| PKH_010570 | -0.2967 | -0.1562 | -0.2975 | -0.4503 | -0.2121 | -0.1023 | -0.7577 |
| PKH_144710 | 0.96059 | 1.00216 | 1.09835 | 1.23933 | 0.7951  | 0.62975 | 0.56356 |
| PKH_140840 | -0.3976 | -0.4815 | -0.6666 | -0.6526 | -0.9233 | -0.8725 | -0.4126 |
| PKH_021150 | -1.2423 | -1.1397 | -1.2315 | -0.8494 | -0.7565 | -0.919  | -1.2671 |
| PKH_112250 | 1.08741 | 1.15207 | 0.84067 | 0.59601 | 0.04733 | -0.1344 | 0.21477 |
| PKH_110100 | 0.8491  | 0.85644 | 0.74794 | 0.67227 | 0.49968 | 0.35754 | 0.39462 |
| PKH_081970 | -0.2354 | -0.0962 | 0.14695 | 0.45168 | 0.80629 | 0.96392 | 0.70902 |
| PKH_126920 | -0.3742 | -0.5516 | -0.4853 | -0.4363 | -0.5967 | -0.9418 | -0.6986 |
| PKH_101120 | 1.08524 | 1.16821 | 1.20518 | 1.17959 | 0.84879 | 0.6865  | 0.52115 |
| PKH_124100 | 0.69249 | 0.64207 | 0.80453 | 0.67655 | 0.4378  | 0.6377  | 0.83402 |
| PKH_112350 | -0.1966 | -0.1818 | -0.1897 | -0.2507 | -0.0904 | -0.192  | -0.0075 |
| PKH_070110 | 0.90414 | 0.88069 | 0.94579 | 0.61805 | 0.90461 | 0.59117 | 0.87242 |
| PKH_132460 | 0.17372 | 0.37978 | 0.20101 | 0.55617 | 0.58751 | 0.26896 | 0.30285 |
| PKH_092640 | 0.35255 | 0.4623  | 0.26875 | 0.19472 | 0.03415 | -0.079  | 0.11569 |
| PKH_081240 | 1.38623 | 1.26172 | 1.00412 | 0.68752 | 0.50654 | 0.2812  | 0.84668 |
| PKH_140790 | -0.3024 | -0.2513 | -0.4051 | -0.6429 | -0.327  | -0.2374 | 0.07171 |
| PKH_101950 | -0.5722 | -0.3932 | -0.5057 | -0.3957 | -0.5868 | -0.6418 | -2.2596 |
| PKH_052050 | 0.59092 | 0.89307 | 1.44156 | 1.64065 | 1.33928 | 0.89524 | 0.35778 |
| PKH_011660 | 0.60061 | 0.62327 | 0.44136 | 0.19536 | 0.3306  | 0.21745 | 0.05721 |
| PKH_113680 | -0.2345 | -0.0808 | -0.025  | 0.21834 | 0.03116 | 0.00312 | -0.1761 |
| PKH_110140 | 0.72916 | 0.82172 | 0.79061 | 0.4021  | 0.30542 | 0.03914 | -0.0426 |
| PKH_111630 | 0.16232 | 0.30999 | 0.51313 | 0.75938 | 0.54337 | 0.25213 | 0.2702  |
| PKH_126780 | 0.41602 | 0.54201 | 0.45744 | 0.64602 | 0.33335 | 0.29984 | 0.29576 |
| PKH_082570 | -0.2672 | -0.1157 | -0.5355 | 0.10713 | 0.10058 | -0.0966 | -1.3451 |
| PKH_144920 | 0.38442 | 0.53488 | 0.26254 | -0.0718 | -0.2526 | -0.4917 | -1.2716 |
| PKH_130260 | 0.63816 | 0.69981 | 1.03802 | 0.72662 | 0.82822 | 0.9672  | 0.86112 |
| PKH_030260 | -1.1256 | -0.46   | -0.8878 | -0.5639 | -0.949  | -1.007  | -3.1472 |
| PKH_112940 | 0.32744 | 0.33584 | 0.21277 | 0.23921 | 0.01554 | -0.188  | -0.2032 |
| PKH_073120 | -0.3452 | -0.4022 | -0.3337 | -0.3075 | -0.3926 | -0.3544 | -0.3624 |
| PKH_142360 | 0.05243 | -0.0368 | -0.0911 | -0.1762 | -0.16   | -0.3091 | -0.2095 |
| PKH_071450 | 0.31419 | 0.36432 | 0.3951  | 0.45544 | 0.53428 | 0.56417 | 0.14209 |
| PKH_122170 | 0.50357 | 0.23993 | 0.25125 | -0.3536 | 0.38785 | 0.47057 | 0.59275 |
| PKH_020300 | -0.6544 | -0.8809 | -1.1223 | -1.0065 | -0.7237 | -0.2898 | -0.4614 |
| PKH_140730 | 0.75766 | 0.76453 | 0.96094 | 0.95874 | 0.85716 | 0.79312 | 0.22191 |
| PKH_145735 | 0.77194 | 0.63803 | 0.30465 | 0.02972 | 0.2578  | 0.12171 | 0.47755 |
| PKH_091500 | 0.59806 | 0.72357 | 0.82606 | 0.75819 | 0.61614 | 0.38183 | 0.44874 |
| PKH_124380 | 0.10831 | 0.04348 | 0.00335 | 0.08905 | 0.11353 | 0.00542 | 0.03288 |
| PKH_052490 | 0.16174 | 0.03604 | 0.19833 | 0.30083 | 0.48617 | 0.47607 | 0.78121 |
| PKH_131640 | -0.5481 | -0.7498 | -0.8619 | -0.9904 | -0.3091 | -0.1691 | 0.02972 |
| PKH_082470 | -0.469  | -0.5275 | -0.4567 | -0.5642 | -0.64   | -0.3545 | -0.0063 |
| PKH_141840 | 0.11557 | 0.22487 | 0.3637  | 0.11974 | 0.34159 | 0.23597 | 0.35277 |
| PKH_125530 | 0.32033 | 0.54058 | 0.39639 | 0.2736  | 0.45414 | 0.3075  | 0.11551 |
| PKH_072780 | 0.65041 | 0.91177 | 0.99387 | 0.90342 | 0.45298 | 0.26798 | -0.1005 |
| PKH_062030 | -0.4105 | -0.3882 | -0.5645 | -0.393  | -0.254  | 0.06204 | -0.2908 |
| PKH_091830 | 0.10802 | 0.14682 | 0.1907  | 0.44671 | 0.42335 | 0.29595 | 0.18621 |
| PKH_011330 | -1.9991 | -2.0808 | -2.2868 | -2.2895 | -1.8788 | -1.9443 | -2.1227 |

|            |         |         |         |         |         |         |         |
|------------|---------|---------|---------|---------|---------|---------|---------|
| PKH_091850 | 0.32659 | 0.37433 | 0.52332 | 0.32444 | 0.41992 | 0.45211 | 0.21424 |
| PKH_091390 | 0.21412 | 0.26236 | 0.17746 | 0.30296 | 0.39759 | 0.42373 | 0.76712 |
| PKH_011510 | -1.9089 | -2.1949 | -1.9536 | -2.0041 | -0.3868 | -0.2797 | -0.7237 |
| PKH_142760 | -0.4819 | -0.4255 | -0.1486 | 0.32111 | 0.2211  | 0.11622 | 0.21861 |
| PKH_011670 | 0.59119 | 0.4964  | 0.58111 | 0.58909 | 0.63133 | 0.88859 | 1.00124 |
| PKH_146990 | 0.64359 | 0.42731 | 0.63386 | 0.54194 | 0.82711 | 0.83545 | 1.18443 |
| PKH_072410 | -0.0273 | -0.1851 | -0.2366 | -0.2941 | -0.2679 | -0.341  | -0.089  |
| PKH_101260 | -0.2264 | -0.7269 | -1.0215 | -0.9678 | -0.7626 | -0.6736 | -0.9849 |
| PKH_080350 | 0.94772 | 1.2913  | 1.50738 | 1.48661 | 1.23413 | 0.78776 | 0.35439 |
| PKH_040080 | 0.35831 | 0.42883 | 0.55953 | 0.87585 | 0.54265 | 0.53946 | 0.33989 |
| PKH_092680 | 0.19544 | 0.11455 | -0.0269 | -0.0233 | -0.3591 | -0.4677 | -0.59   |
| PKH_011110 | -0.8508 | -0.7879 | -1.1316 | -1.291  | -0.9505 | -0.8569 | -1.3054 |
| PKH_113270 | 0.75406 | 0.75424 | 0.95999 | 0.94568 | 0.60852 | 0.47723 | 0.77255 |
| PKH_081040 | 0.36054 | 0.65309 | 0.4472  | 0.61996 | 0.41558 | 0.03744 | -0.3414 |
| PKH_113050 | -0.2776 | 0.08591 | 0.39053 | 0.46826 | 0.18854 | 0.07016 | 0.30637 |
| PKH_050130 | -0.3958 | -0.3982 | -0.3087 | -0.2007 | 0.06817 | -0.0744 | -0.0758 |
| PKH_070410 | -0.2305 | -0.2286 | -0.2624 | -0.6317 | -0.3456 | -0.5072 | -0.4936 |
| PKH_051060 | -0.5959 | -0.5571 | -1.1762 | -0.7897 | -0.8545 | -0.9171 | -1.9991 |
| PKH_124330 | -0.6232 | -0.7557 | -0.691  | -0.9867 | -0.8634 | -0.4977 | -0.353  |
| PKH_020910 | -0.0166 | -0.8654 | -1.68   | -1.5376 | 0.51405 | 1.43303 | 1.5264  |
| PKH_146090 | -0.02   | -0.321  | 0.05437 | -0.121  | -0.1232 | -0.0752 | -0.091  |
| PKH_031090 | -0.529  | -0.9694 | -0.8669 | -0.9044 | -0.4015 | 0.26033 | -0.0554 |
| PKH_120560 | -0.1654 | -0.0769 | -0.3563 | -0.0877 | -0.4285 | -0.0134 | -1.6011 |
| PKH_020160 | 0.30948 | 0.45404 | 0.03385 | 0.38231 | 0.00983 | -0.2324 | -0.7158 |
| PKH_142350 | -0.3303 | -0.1982 | -0.1513 | -0.301  | -0.1352 | -0.0239 | 0.15096 |
| PKH_082170 | -0.2451 | -0.2464 | -0.1611 | -0.11   | -0.3543 | -0.4227 | -1.6484 |
| PKH_090310 | 0.22758 | 0.14312 | 0.35713 | 0.32917 | 0.35513 | 0.76684 | 0.82915 |
| PKH_120580 | -0.2696 | -0.1416 | 0.01946 | 0.18698 | 0.32909 | 0.0318  | 0.08694 |
| PKH_112240 | 0.13422 | 0.19743 | 0.34062 | 0.32708 | 0.16203 | -0.0262 | -1.4226 |
| PKH_126110 | 0.58748 | 0.46007 | 0.40061 | 0.16454 | 0.11509 | 0.24798 | 0.59244 |
| PKH_072530 | -0.1348 | 0.10593 | -0.0109 | 0.0031  | 0.34956 | 0.17327 | -1.1286 |
| PKH_145950 | 0.08628 | 0.23582 | 0.30195 | 0.27406 | 0.20446 | 0.11973 | -0.0833 |
| PKH_083550 | 0.27231 | 0.31495 | 0.08364 | 0.20987 | 0.17739 | 0.05726 | -1.3253 |
| PKH_130530 | -0.3283 | -0.8847 | -1.005  | -0.7704 | -0.4649 | -0.0231 | -0.2324 |
| PKH_060760 | -0.0821 | 0.33713 | 0.32926 | 0.45894 | 0.40406 | 0.13418 | -0.37   |
| PKH_133300 | -0.2229 | -0.3483 | -0.3736 | -0.1235 | -0.2647 | 0.0875  | 0.33531 |
| PKH_051110 | 0.50867 | 0.97267 | 0.7957  | 0.95017 | 0.49433 | 0.21256 | -0.1075 |
| PKH_082130 | 0.39004 | 0.14894 | 0.11386 | 0.03192 | -0.0119 | 0.13189 | 0.59079 |
| PKH_101710 | -0.5766 | -0.5433 | -0.4873 | -0.3645 | -0.3994 | -0.5459 | -1.9142 |
| PKH_143650 | 0.37614 | 0.41429 | 0.30052 | 0.20048 | 0.49973 | 0.41197 | 0.50844 |
| PKH_071900 | -0.2946 | -0.4551 | -0.6359 | -0.559  | -0.6122 | -0.5535 | -0.1297 |
| PKH_113170 | -0.0634 | 0.14513 | 0.16569 | 0.62861 | 0.63942 | 0.69891 | 0.79096 |
| PKH_050580 | -0.6326 | -0.3615 | -0.0743 | 0.51114 | -0.0589 | -0.3124 | -0.8354 |
| PKH_101040 | -0.3501 | 0.02689 | 0.11653 | 0.57104 | 0.27123 | 0.30497 | 0.28476 |
| PKH_072240 | 0.45124 | 0.92125 | 0.85351 | 0.57827 | 0.57164 | 0.23945 | 0.20239 |
| PKH_122570 | 1.16597 | 1.13639 | 1.06228 | 0.90713 | 0.83069 | 0.55462 | 0.73397 |
| PKH_070170 | 0.58847 | 1.30935 | 1.32384 | 1.76718 | 1.32272 | 0.61666 | 0.25696 |
| PKH_125510 | 0.30004 | -0.526  | -0.922  | -1.3927 | -0.494  | 0.79175 | 1.6015  |
| PKH_100150 | 0.61047 | 0.44326 | 0.51265 | 0.55719 | 0.59416 | 0.6904  | 0.6896  |
| PKH_110790 | -0.5282 | -0.6721 | -0.4582 | -0.5956 | -0.3605 | -0.31   | -0.4098 |
| PKH_132390 | 0.28853 | 0.23775 | 0.36405 | 0.21159 | 0.31646 | -0.4032 | 0.68001 |
| PKH_125200 | 0.21633 | 0.19999 | 0.15219 | 0.30254 | 0.55771 | 0.524   | 0.56419 |
| PKH_061400 | 0.05094 | 0.02925 | 0.03379 | -0.0179 | -0.1382 | 0.02947 | -0.2073 |
| PKH_123110 | -0.3712 | -0.229  | -0.1662 | -0.1144 | -0.2545 | -0.2244 | -1.9431 |
| PKH_121770 | -0.1242 | -0.1622 | -0.0201 | -0.0024 | -0.1385 | -0.1751 | -0.3725 |
| PKH_010900 | -0.238  | 0.01363 | 0.13532 | 0.15281 | -0.1243 | -0.3331 | -0.5856 |
| PKH_125960 | 0.02064 | 0.00944 | -0.0079 | 0.08592 | 0.0475  | 0.03413 | -0.0903 |
| PKH_114690 | 0.78346 | 0.90511 | 0.91398 | 1.17547 | 0.87507 | 0.58553 | 0.49171 |
| PKH_020480 | -0.1581 | -0.0905 | -0.1931 | -0.0784 | -0.0094 | -0.0351 | -0.1753 |
| PKH_000680 | 0.09679 | -0.0615 | 0.16681 | 0.02346 | -0.0288 | 0.00921 | -1.2515 |
| PKH_011090 | -0.3092 | 0.1548  | -0.5642 | -0.234  | -0.0279 | -0.0267 | -0.0822 |
| PKH_030370 | -0.8997 | -0.44   | -0.6188 | -0.4896 | -0.797  | -0.7614 | -1.0309 |
| PKH_145240 | 0.06022 | -0.1459 | -0.1013 | -0.3517 | -0.2039 | -0.1024 | 0.0281  |

|            |         |         |         |         |         |         |         |
|------------|---------|---------|---------|---------|---------|---------|---------|
| PKH_110030 | 1.29265 | 0.97121 | 0.79146 | 0.56114 | 0.596   | 0.34236 | 0.45983 |
| PKH_125450 | 0.08284 | 0.05281 | 0.02194 | 0.4907  | 0.11608 | 0.08518 | 0.00554 |
| PKH_141040 | -0.7969 | -0.6791 | -0.5792 | -0.588  | -0.292  | -0.3559 | -0.2875 |
| PKH_061780 | 0.75897 | 0.67119 | 0.75398 | 0.51965 | 0.51344 | 0.26097 | 0.36252 |
| PKH_051410 | -0.6589 | -0.4948 | -0.5244 | -0.1836 | -0.1802 | 0.03031 | -0.142  |
| PKH_142870 | 0.01319 | -0.1659 | -0.5135 | -0.1859 | -0.2959 | -0.1495 | 0.23974 |
| PKH_130980 | -0.1009 | -0.1131 | 0.06201 | 0.07985 | 0.22605 | 0.10737 | 0.26289 |
| PKH_093050 | 0.09942 | 0.27616 | 0.24227 | 0.38936 | 0.45891 | 0.19217 | 0.05058 |
| PKH_050021 | -0.2358 | -0.4742 | -0.4836 | -0.0662 | 0.47348 | 0.58237 | 0.61816 |
| PKH_123820 | 0.57509 | 0.4924  | 0.82977 | 0.84647 | 0.54014 | 0.41791 | 0.64351 |
| PKH_110630 | 0.49919 | 0.46586 | 0.43845 | 0.03684 | -0.005  | 0.19795 | 0.34281 |
| PKH_142920 | 0.02852 | 0.1552  | -0.1481 | -0.4658 | -0.5593 | -0.4532 | -0.2316 |
| PKH_083740 | 0.09392 | 0.14974 | 0.16452 | 0.06546 | 0.0506  | -0.0441 | 0.10793 |
| PKH_100430 | -0.0323 | -0.2284 | 0.03355 | 0.05622 | -0.0295 | 0.03368 | -1.1977 |
| PKH_110360 | -0.2588 | -0.2915 | -0.2122 | -0.4316 | -0.2643 | -0.2047 | -0.1933 |
| PKH_124190 | 0.57865 | 0.63771 | 1.01502 | 1.19796 | 0.2884  | 0.11073 | -0.1821 |
| PKH_122980 | -0.3419 | -0.324  | -0.1646 | -0.1346 | 0.04307 | 0.04177 | 0.19503 |
| PKH_020960 | -0.0861 | -0.0121 | -0.0651 | 0.00125 | -0.3051 | -0.2987 | -1.6864 |
| PKH_123270 | -0.8456 | -0.5708 | -0.5198 | -0.3064 | -0.2127 | -0.1931 | -0.0113 |
| PKH_140530 | -0.3849 | -0.4148 | -0.4572 | -0.2942 | -0.432  | -0.4211 | -0.4621 |
| PKH_112460 | -0.0017 | -0.1819 | 0.15314 | 0.09446 | -0.0238 | 0.11958 | 0.50291 |
| PKH_145620 | 0.69553 | 0.64408 | 0.48695 | 0.30941 | 0.1856  | 0.20358 | 0.5519  |
| PKH_131620 | 0.04643 | -0.0495 | -0.0935 | -0.0865 | -0.1375 | -0.167  | 0.15726 |
| PKH_092780 | 0.67231 | 0.4973  | 0.27709 | 0.2846  | -0.0276 | -0.0878 | 0.13047 |
| PKH_100850 | -0.1128 | -0.1977 | -0.6622 | -0.3564 | -0.6883 | -0.816  | -2.0996 |
| PKH_120160 | 0.30959 | 0.45236 | 0.54908 | 0.74341 | 0.53089 | 0.41291 | 0.13796 |
| PKH_126580 | 0.54511 | 0.74289 | 0.39665 | 0.49645 | 0.44041 | 0.33462 | 0.37999 |
| PKH_112580 | 0.06906 | 0.15393 | 0.10622 | 0.21283 | -0.0833 | -0.1598 | -0.0665 |
| PKH_132760 | 0.20531 | 0.12883 | -0.0023 | -0.118  | -0.043  | -0.166  | 0.03737 |
| PKH_011410 | 0.0603  | 0.14415 | 0.04319 | 0.11548 | 0.08524 | 0.12515 | -0.5901 |
| PKH_123280 | -0.7243 | -0.6593 | -0.7493 | -0.591  | -0.5733 | -0.7114 | -1.0997 |
| PKH_072250 | 0.68347 | 0.69794 | 0.65664 | 0.67526 | 0.55408 | 0.35202 | 0.39011 |
| PKH_020720 | -0.4477 | -0.2407 | -0.1813 | -0.2562 | -0.239  | -0.3034 | -0.4768 |
| PKH_041190 | -0.3122 | -0.2216 | 0.20919 | 0.26335 | 0.25399 | 0.60948 | 0.29848 |
| PKH_093720 | 0.65183 | 0.69822 | 0.62197 | 0.58209 | 0.20503 | -0.1711 | -0.285  |
| PKH_144160 | 0.25127 | 0.33542 | 0.53104 | 0.47168 | 0.33246 | 0.40529 | 0.60166 |
| PKH_060890 | -0.5976 | 0.14885 | 0.00687 | 0.03806 | 0.14788 | -0.0729 | -0.1242 |
| PKH_121580 | 0.16174 | 0.18264 | 0.43448 | 0.55262 | 0.38802 | 0.06952 | 0.57484 |
| PKH_113740 | 0.5168  | 0.50697 | 0.70816 | 1.01024 | 0.96384 | 0.72388 | 0.40652 |
| PKH_140060 | 0.76948 | 0.72103 | 0.27984 | 0.07259 | -0.0354 | 0.08058 | 0.3668  |
| PKH_040100 | 0.48018 | 0.65147 | 0.64545 | 0.80596 | 0.51352 | 0.35028 | 0.59567 |
| PKH_070100 | 0.06991 | -0.1577 | -0.1925 | -0.2342 | 0.02041 | -0.2333 | 0.00263 |
| PKH_123080 | 0.13975 | 0.30091 | 0.61746 | 0.58327 | 0.73273 | 0.65937 | 0.45945 |
| PKH_090140 | -0.7158 | -0.8262 | -0.6561 | -0.6306 | -0.4573 | -0.3303 | -0.2723 |
| PKH_111410 | 0.0391  | -0.064  | 0.191   | 0.37195 | 0.23282 | 0.30901 | 0.07247 |
| PKH_146900 | 0.49112 | 0.61336 | 0.91771 | 1.50133 | 0.76804 | 0.68466 | 0.80271 |
| PKH_050600 | -0.0393 | 0.0131  | 0.52293 | -0.0115 | 0.81469 | 0.73659 | 0.27007 |
| PKH_141450 | 0.09003 | 0.0831  | 0.07274 | 0.12782 | -0.0393 | 0.18885 | 0.17083 |
| PKH_031710 | -1.0416 | -1.4316 | -1.4935 | -1.7773 | -1.6782 | -1.4077 | -1.411  |
| PKH_145250 | -0.6323 | -0.8358 | -0.5959 | -0.2209 | -0.3662 | -0.5328 | -0.2233 |
| PKH_081600 | -0.0717 | -0.1468 | -0.3502 | -0.2199 | -0.2949 | -0.2576 | -0.2619 |
| PKH_031410 | -0.5565 | -0.603  | -0.607  | -0.6763 | -0.8081 | -0.8844 | -1.6455 |
| PKH_010340 | -1.628  | -1.7526 | -1.983  | -2.0606 | -1.7628 | -1.8913 | -2.1539 |
| PKH_082490 | -0.5454 | -0.5168 | -0.2642 | -0.143  | -0.2505 | -0.1971 | -0.3696 |
| PKH_000430 | -0.4224 | -0.5608 | -0.3203 | -0.5202 | -0.5658 | -0.3541 | -0.2124 |
| PKH_100640 | 0.17421 | 0.55911 | 0.54013 | 0.62513 | 0.13253 | -0.0141 | -0.3839 |
| PKH_145180 | 0.14212 | 0.00327 | 0.08727 | 0.02223 | 0.05638 | 0.11958 | 0.48643 |
| PKH_130600 | -0.4074 | -0.237  | 0.09685 | 0.17957 | 0.30981 | 0.47097 | 0.33801 |
| PKH_134070 | 1.05076 | 0.96033 | 0.84989 | 0.63136 | 0.84505 | 0.64964 | 0.44945 |
| PKH_144030 | 0.08549 | 0.00076 | -0.069  | -0.0086 | -0.076  | -0.1268 | -0.0995 |
| PKH_021110 | -0.0517 | 0.13788 | 0.34871 | 0.44211 | 0.72511 | 0.02416 | -0.4106 |
| PKH_050240 | 0.0137  | 0.14499 | 0.20908 | 0.19284 | 0.05299 | -0.1124 | -1.3473 |
| PKH_113560 | -0.1048 | -0.1498 | -0.0107 | 0.00324 | -0.0455 | 0.05929 | 0.15292 |



|            |         |         |         |         |         |         |         |
|------------|---------|---------|---------|---------|---------|---------|---------|
| PKH_102890 | -0.3218 | -0.1887 | -0.2572 | 0.09412 | 0.25591 | 0.04111 | -0.069  |
| PKH_030600 | -1.7114 | -1.594  | -1.3314 | -1.4086 | -0.9357 | -1.2007 | -1.4536 |
| PKH_126510 | 0.62701 | 0.51103 | 0.42347 | 0.20855 | 0.1083  | 0.09206 | 0.14113 |
| PKH_021180 | -0.3916 | -0.2319 | -0.2996 | -0.2187 | -0.3493 | -0.2296 | -0.4461 |
| PKH_062310 | 0.41371 | 0.25795 | -0.2627 | -0.8632 | -1.0623 | -0.7793 | 0.04656 |
| PKH_114410 | -0.7029 | -0.3818 | 0.02666 | 0.24602 | 0.35219 | 0.35971 | -0.19   |
| PKH_091140 | -0.3236 | -0.1325 | -0.1352 | 0.17165 | 0.26718 | 0.43153 | 0.42842 |
| PKH_121260 | 0.92539 | 0.82453 | 0.54216 | 0.73015 | 0.90159 | 0.83797 | 0.83307 |
| PKH_062220 | 0.0838  | 0.09741 | 0.38604 | 0.70037 | 0.5714  | 0.57057 | 0.67478 |
| PKH_114910 | -0.4945 | -0.5576 | -0.8385 | -0.4351 | -0.5019 | -0.4047 | -1.4547 |
| PKH_061340 | 0.7095  | 0.60175 | 0.33407 | 0.11665 | 0.15392 | -0.0067 | -0.0677 |
| PKH_092260 | -0.4627 | -0.1734 | -0.5239 | -0.2917 | -0.4377 | -0.4681 | -0.7887 |
| PKH_061070 | 0.49407 | 0.67334 | 0.36282 | 0.43657 | 0.17962 | 0.24121 | -0.0755 |
| PKH_080050 | -0.7112 | -0.9767 | -1.329  | -1.2915 | -0.9242 | -0.7037 | -0.322  |
| PKH_131265 | -0.4856 | -0.3566 | -0.183  | 0.1523  | 0.53207 | 0.39836 | 0.57005 |
| PKH_010470 | -0.6586 | -0.6747 | -0.7875 | -0.6271 | -0.851  | -0.7929 | -1.0888 |
| PKH_070190 | -0.4393 | -0.0966 | 0.44435 | 0.80706 | 0.7886  | 0.67841 | 0.13826 |
| PKH_091040 | 0.43484 | 0.24355 | 0.03257 | 0.2385  | 0.32302 | 0.47362 | -0.1843 |
| PKH_146560 | 0.22571 | 0.09975 | 0.13166 | 0.1488  | 0.11378 | 0.19556 | 0.34101 |
| PKH_110090 | 0.3566  | 0.63167 | 0.77246 | 0.69995 | 0.79731 | 0.31375 | 0.04289 |
| PKH_040300 | -0.9832 | -0.76   | -0.9781 | -0.863  | -1.015  | -1.2136 | -1.9404 |
| PKH_070820 | 0.40326 | 0.25749 | 0.03433 | 0.08175 | 0.11035 | -0.0123 | 0.24082 |
| PKH_070980 | 0.45705 | 0.42383 | 0.51058 | 0.55987 | 0.03771 | 0.2938  | 0.96365 |
| PKH_070590 | -0.4983 | -0.9066 | -1.0072 | -0.721  | 0.26019 | 0.70648 | 0.62589 |
| PKH_122460 | 0.30923 | 0.23463 | 0.36703 | 0.32079 | 0.16982 | 0.31597 | 0.53582 |
| PKH_102850 | -0.0124 | -0.0115 | -0.0789 | -0.2094 | -0.1606 | -0.1206 | 0.03031 |
| PKH_113040 | -0.4736 | -0.5174 | -0.5285 | -0.5259 | -0.3151 | -0.3129 | -0.5745 |
| PKH_073450 | -0.4913 | -0.5749 | -0.4618 | -0.7532 | -0.5518 | -0.6509 | -0.4105 |
| PKH_141010 | 0.40024 | 0.29284 | 0.43455 | 0.46247 | 0.26037 | 0.11381 | 0.34545 |
| PKH_071580 | -0.302  | -0.1324 | -0.319  | 0.04422 | 0.43197 | 0.61946 | 0.6038  |
| PKH_071500 | -1.1401 | -0.9997 | -1.2078 | -0.991  | -1.2833 | -1.2497 | -3.0061 |
| PKH_103020 | -0.0317 | -0.0524 | 0.60632 | 0.47703 | 1.01338 | 1.07913 | 1.32219 |
| PKH_093790 | -0.4258 | -0.5939 | -0.3899 | -0.436  | -0.3759 | -0.3195 | -0.3225 |
| PKH_130060 | -0.3437 | -0.1798 | -0.076  | 0.04127 | 0.09953 | 0.04664 | -0.2279 |
| PKH_101990 | 0.14421 | 0.25888 | 0.32016 | 0.00071 | -0.313  | -0.4123 | -0.1287 |
| PKH_092280 | 0.09075 | 0.05207 | -0.0108 | -0.1145 | -0.0459 | -0.1051 | 0.20172 |
| PKH_060400 | 0.01853 | -0.0527 | -0.2601 | -0.2805 | -0.3427 | -0.284  | -0.2054 |
| PKH_082180 | -0.8484 | -0.6143 | -0.7435 | -0.7548 | -0.8071 | -0.9273 | -1.3073 |
| PKH_131270 | 0.0962  | 0.0074  | -0.0748 | 0.05019 | -0.0049 | 0.0248  | 0.17917 |
| PKH_124390 | 0.39468 | 0.10032 | 0.41547 | 0.2753  | 0.6152  | 0.4164  | 0.92267 |
| PKH_110880 | -0.7771 | -0.1996 | -0.0895 | 0.3566  | -0.1168 | -0.1664 | -0.6016 |
| PKH_090170 | -1.1266 | -0.8716 | -1.0775 | -0.6495 | -1.163  | -0.8749 | -1.8155 |
| PKH_125130 | 0.01726 | 0.35003 | 0.22135 | 0.51852 | 0.18755 | 0.24788 | -1.3241 |
| PKH_124460 | -0.5185 | -0.8873 | -0.8048 | -0.4268 | 0.40981 | 0.94911 | 0.93771 |
| PKH_121830 | -0.4842 | -0.4972 | -0.2649 | -0.2398 | -0.3108 | -0.0672 | -0.119  |
| PKH_071480 | -0.2953 | -0.2273 | -0.2267 | 0.24106 | 0.01495 | 0.17519 | -0.4687 |
| PKH_050380 | 0.57177 | 0.55425 | 0.27466 | 0.38215 | 0.04643 | 0.04185 | 0.56304 |
| PKH_111420 | -0.216  | -0.5105 | -0.3973 | -0.164  | 0.28704 | 0.7851  | 0.41241 |
| PKH_131360 | 0.83118 | 0.84368 | 1.11457 | 1.20398 | 0.94494 | 0.64021 | 0.3549  |
| PKH_124750 | 0.27854 | 0.06999 | -0.0086 | 0.23012 | 0.05559 | 0.15976 | -0.3309 |
| PKH_101660 | 0.65191 | 0.72595 | 0.68065 | 0.34162 | 0.17541 | 0.23028 | 0.65567 |
| PKH_081820 | 0.37958 | 0.3153  | 0.09828 | 0.05459 | -0.0547 | -0.1456 | 0.04356 |
| PKH_110940 | 0.31674 | 0.38519 | 0.62711 | 0.327   | 0.39864 | 0.41948 | 0.25041 |
| PKH_090960 | 0.27832 | 0.16033 | 0.06426 | 0.00278 | 0.12999 | -0.091  | 0.17927 |
| PKH_100490 | 0.56769 | 0.8316  | 0.84248 | 0.88103 | 0.65396 | 0.68654 | 0.74447 |
| PKH_061720 | 0.01782 | -0.0121 | 0.00331 | 0.03183 | -0.0761 | -0.2925 | -1.6755 |
| PKH_100680 | 0.01323 | -0.0082 | 0.16458 | 0.11045 | 0.23153 | 0.41911 | 0.50209 |
| PKH_082500 | -0.1367 | -0.271  | -0.1879 | -0.0972 | -0.3093 | -0.1951 | -1.519  |
| PKH_124030 | -0.3542 | -0.4496 | -0.6317 | -0.6757 | -0.576  | -0.5076 | -0.3602 |
| PKH_092430 | -0.1922 | -0.2725 | -0.2346 | -0.278  | 0.1414  | 0.40759 | 0.46759 |
| PKH_134270 | -0.3504 | -0.1866 | -0.4155 | -0.2356 | -0.2301 | -0.3726 | -0.6912 |
| PKH_070830 | -0.1586 | 0.11973 | 0.28652 | 0.49925 | 0.35504 | 0.39643 | 0.01018 |
| PKH_131470 | 0.57304 | 0.18188 | 0.32327 | 0.09663 | 0.19574 | 0.06216 | 0.25496 |

|            |         |         |         |         |         |         |         |
|------------|---------|---------|---------|---------|---------|---------|---------|
| PKH_092100 | 0.19827 | 0.19349 | 0.13805 | 0.09973 | 0.19265 | 0.40674 | 0.01998 |
| PKH_143790 | 0.05071 | -0.0313 | 0.02392 | -0.0106 | 0.53571 | 0.72194 | 0.49503 |
| PKH_010390 | -0.2251 | 0.30976 | 0.45184 | 0.34859 | 0.70862 | 0.58249 | -0.1248 |
| PKH_112960 | 0.39136 | 0.40994 | 0.11637 | 0.19719 | 0.14511 | 0.19813 | -0.0674 |
| PKH_133150 | -0.1156 | -0.1588 | -0.2874 | 0.09523 | -0.007  | 0.03503 | -0.0487 |
| PKH_010370 | -0.7497 | -0.6554 | -0.9945 | -0.8269 | -1.0835 | -1.1871 | -2.8009 |
| PKH_126350 | -0.1492 | -0.0358 | 0.06297 | 0.01752 | -0.0353 | -0.0738 | -1.6369 |
| PKH_130610 | 0.47614 | 0.4446  | 0.21701 | 0.17009 | 0.05527 | 0.27342 | 0.62905 |
| PKH_121220 | -0.3372 | -0.1544 | -0.1488 | -0.5134 | -0.5888 | -0.3604 | -0.143  |
| PKH_061110 | -0.1575 | -0.1153 | -0.2997 | -0.5699 | -0.6626 | -0.8229 | -0.9521 |
| PKH_102250 | -0.5375 | -0.4284 | -0.5824 | -0.9887 | -0.7971 | -0.6165 | -0.5924 |
| PKH_041290 | 0.37209 | 0.223   | 0.33724 | 0.07568 | 0.08984 | 0.15869 | 0.53455 |
| PKH_011570 | -1.9049 | -1.772  | -1.7659 | -1.9598 | -1.1627 | -1.1435 | -1.768  |
| PKH_092370 | -0.096  | 0.04619 | 0.17731 | 0.2756  | 0.20849 | -0.0278 | -0.3362 |
| PKH_121240 | -0.0921 | 0.01327 | -0.0246 | 0.25882 | 0.15774 | 0.02482 | -0.0796 |
| PKH_110040 | 0.87466 | 0.82573 | 0.53759 | 0.57452 | 0.54903 | 0.20902 | 0.52122 |
| PKH_060790 | 0.284   | 0.17512 | 0.4008  | 0.17009 | 0.27778 | 0.30993 | 0.47818 |
| PKH_011650 | 0.02952 | -0.1303 | -0.1982 | -0.4703 | -0.5347 | -0.4971 | -0.7751 |
| PKH_060240 | -0.7586 | -0.7201 | -0.7974 | -0.6104 | -0.563  | -0.4076 | -0.3168 |
| PKH_133700 | -0.8075 | -0.3135 | 0.29942 | 0.38864 | 0.18565 | -0.1137 | -1.03   |
| PKH_122160 | 1.03491 | 0.22386 | 0.32376 | -0.3283 | 0.11968 | -0.1637 | 0.54605 |
| PKH_050690 | -0.6492 | -0.6193 | -0.8    | -1.1756 | -1.3046 | -1.1733 | -1.6286 |
| PKH_030970 | -0.8085 | -0.703  | -0.579  | -0.6751 | -0.0639 | 0.33261 | 0.34879 |
| PKH_040140 | 0.22155 | 0.5543  | 0.57361 | 0.44339 | 0.41819 | 0.38871 | 0.73362 |
| PKH_132110 | 0.10098 | -0.0743 | 0.14918 | 0.02582 | 0.09031 | 0.02467 | 0.19696 |
| PKH_120120 | -0.1674 | -0.4582 | -0.6556 | -0.4305 | -0.5623 | -0.5365 | -1.2039 |
| PKH_082370 | 0.30561 | 0.34032 | 0.22406 | 0.45329 | 0.51709 | 0.35446 | 0.36413 |
| PKH_081560 | 0.06268 | 0.02384 | -0.3365 | -1.1431 | -1.1494 | -1.5428 | -1.2058 |
| PKH_140720 | 0.5031  | 0.41775 | 0.42233 | 0.30427 | -0.0552 | 0.03644 | 0.31124 |
| PKH_051320 | -0.3828 | -0.4323 | -0.3168 | -0.1785 | -0.2782 | -0.2468 | -0.6606 |
| PKH_130590 | -0.107  | -0.1699 | -0.2083 | -0.0808 | -0.1317 | -0.0393 | -0.1079 |
| PKH_011600 | -0.5185 | -0.717  | -0.9914 | -1.0268 | -1.2288 | -0.8737 | -0.631  |
| PKH_021340 | -0.0153 | 0.00719 | 0.15213 | 0.16805 | 0.0491  | -0.1135 | -0.3392 |
| PKH_050080 | -0.1752 | -0.0073 | -0.3181 | -0.4102 | -0.6979 | -0.4359 | -0.3002 |
| PKH_010660 | 0.4391  | 0.37032 | 0.52896 | 0.21011 | 0.14337 | 0.02852 | 0.10493 |
| PKH_140440 | 0.25447 | 0.66371 | 0.83344 | 0.71062 | 0.81939 | 0.80318 | 0.63861 |
| PKH_080950 | -0.2325 | -0.076  | -0.1922 | -0.3783 | -0.3951 | -0.4713 | -0.4131 |
| PKH_142780 | 0.55105 | 0.56682 | 0.70127 | 0.91353 | 0.88183 | 1.08145 | 1.44192 |
| PKH_121490 | -0.1115 | -0.1218 | -0.171  | -0.2323 | 0.01712 | -0.0016 | -0.0898 |
| PKH_112980 | -0.1606 | -0.3141 | -0.1847 | -0.4526 | -0.524  | -0.5581 | -0.7329 |
| PKH_082860 | -0.4497 | -0.7412 | -0.6802 | -0.5539 | -0.4031 | -0.5646 | -0.7855 |
| PKH_091710 | -0.4252 | -0.0986 | 0.00698 | 0.29843 | 0.26255 | 0.77021 | 0.67124 |
| PKH_126500 | -0.2051 | -0.1251 | -0.0864 | -0.0762 | 0.1166  | 0.34729 | 0.37942 |
| PKH_101630 | -0.3957 | -0.4568 | -0.8971 | -0.3358 | -0.3243 | 0.08455 | -0.9857 |
| PKH_120830 | -0.1726 | -0.3191 | -0.2444 | -0.2539 | -0.2406 | -0.0292 | 0.07975 |
| PKH_131770 | -0.2706 | -0.8109 | -1.2481 | -0.8373 | -0.4691 | 0.05518 | 0.62474 |
| PKH_111090 | -0.0582 | -0.1589 | 0.21485 | 0.09657 | 0.35551 | 0.09878 | -0.0298 |
| PKH_114710 | 0.77332 | 0.45764 | 0.56123 | 0.39176 | 0.4006  | 0.57833 | 0.33062 |
| PKH_141180 | 0.34391 | 0.42333 | 0.48911 | 0.38951 | 0.27805 | 0.1543  | 0.18617 |
| PKH_124880 | 0.84565 | 0.85992 | 0.55713 | 0.36597 | 0.68089 | 0.96414 | 1.96484 |
| PKH_082380 | 0.37258 | 0.42445 | 0.19939 | 0.02368 | -0.1468 | -0.399  | -0.1582 |
| PKH_000520 | 0.79215 | 0.31653 | -0.0097 | -0.525  | -0.6812 | -0.2332 | 0.58916 |
| PKH_110130 | -0.2669 | -0.2414 | -0.3289 | -0.2036 | -0.2749 | -0.3716 | -0.7142 |
| PKH_021310 | -1.1992 | -1.4194 | -1.5341 | -0.6161 | -0.3442 | -0.0335 | -0.3913 |
| PKH_010720 | -0.206  | -0.1851 | -0.1621 | 0.11753 | -0.0079 | -0.121  | -0.7381 |
| PKH_126690 | -0.2871 | -0.205  | -0.1952 | 0.26175 | 0.02243 | -0.0103 | 0.17526 |
| PKH_141320 | 0.07601 | 0.04803 | 0.03181 | -0.2925 | -0.0335 | 0.03119 | 0.46906 |
| PKH_083160 | 0.25931 | 0.29829 | 0.03442 | -0.0067 | -0.2153 | -0.3992 | -0.316  |
| PKH_132440 | 0.42432 | 0.21283 | 0.19578 | 0.02184 | -0.0645 | 0.01156 | 0.31925 |
| PKH_041590 | -1.1961 | -1.6166 | -1.4046 | -0.7045 | -0.0053 | 0.40194 | -0.1479 |
| PKH_126890 | -0.3507 | -0.034  | 0.22296 | 0.27394 | -0.1305 | -0.4764 | -0.3238 |
| PKH_146000 | 0.91972 | 0.84742 | 0.82447 | 0.64105 | 0.47184 | 0.17452 | 0.47239 |
| PKH_011010 | -0.4489 | -0.7827 | -0.6628 | -0.608  | -0.7089 | -0.7985 | -0.679  |

|            |         |         |         |         |         |         |         |
|------------|---------|---------|---------|---------|---------|---------|---------|
| PKH_125050 | -0.2296 | -0.317  | -0.2131 | -0.1669 | -0.2057 | -0.1497 | -0.1493 |
| PKH_146520 | 0.19933 | -0.0561 | -0.0816 | -0.0356 | -0.4792 | -0.2116 | 0.0457  |
| PKH_094150 | 0.4199  | 0.52593 | 0.23681 | 0.30343 | -0.1388 | -0.1784 | 0.18926 |
| PKH_114080 | -0.9946 | -0.5759 | -0.4477 | -0.1685 | -0.3745 | -0.3477 | -0.5611 |
| PKH_040220 | -0.7075 | -0.7047 | -0.7834 | -0.625  | -0.8563 | -0.8626 | -2.2686 |
| PKH_103070 | 0.17426 | 0.17415 | 0.45162 | 0.25044 | 0.13203 | 0.18237 | -0.0098 |
| PKH_092190 | 0.20006 | 0.24856 | 0.01475 | -0.0007 | 0.05285 | -0.1949 | 0.1338  |
| PKH_062060 | 0.3773  | 0.20636 | 0.22263 | 0.0221  | 0.37419 | 0.01626 | -0.0253 |
| PKH_083320 | 1.58054 | 1.58896 | 1.87096 | 1.23297 | 1.14578 | 0.58121 | 0.14794 |
| PKH_051620 | -0.7493 | -0.4633 | -0.6432 | -0.3295 | -0.6    | -0.4523 | -2.051  |
| PKH_114400 | -0.723  | -0.6879 | -0.8087 | -0.5659 | -0.5783 | -0.7761 | -0.8359 |
| PKH_083710 | 0.28469 | 0.39692 | 0.52536 | 0.31926 | 0.12446 | 0.16899 | 0.10912 |
| PKH_101090 | 0.45221 | 0.39863 | 0.53292 | 0.38547 | 0.45306 | 0.57227 | 0.37678 |
| PKH_140960 | -0.6613 | -1.507  | -2.2645 | -1.6666 | -0.3946 | 0.74039 | 1.65824 |
| PKH_141310 | -0.3872 | -0.511  | -0.838  | -1.0873 | -0.8544 | -0.9936 | -0.8115 |
| PKH_050490 | 0.04999 | 0.31435 | 0.18607 | 0.27606 | 0.05454 | -0.0649 | 0.10021 |
| PKH_111020 | 0.54831 | 0.68526 | 0.49929 | 0.57167 | 0.61578 | 0.53291 | 0.78983 |
| PKH_030010 | -0.5124 | -0.5686 | -0.695  | -0.495  | -0.6843 | -0.6039 | -2.1368 |
| PKH_101820 | -0.4207 | -0.2656 | -0.5245 | -0.6048 | -0.5762 | -0.4776 | -1.0321 |
| PKH_011170 | -0.6154 | -0.7027 | -0.7653 | -0.908  | -0.7372 | -0.9371 | -1.5518 |
| PKH_040460 | -0.4037 | -0.4732 | -0.7671 | -0.5518 | -0.6386 | -0.8088 | -0.6375 |
| PKH_051980 | -1.0749 | -0.8789 | -0.7906 | -0.4948 | -0.3342 | -0.4662 | -0.938  |
| PKH_130680 | -0.9186 | -0.8017 | -0.9368 | -1.0629 | -0.8714 | -1.1172 | -1.4914 |
| PKH_070240 | 0.10731 | 0.04495 | -0.0636 | 0.03032 | -0.0122 | -0.1483 | 0.34281 |
| PKH_041250 | -1.1359 | -1.1285 | -1.551  | -1.5066 | -1.9519 | -1.7319 | -1.8765 |
| PKH_093370 | 0.45334 | 0.75564 | 0.7565  | 0.53803 | 0.51679 | 0.6089  | 0.82378 |
| PKH_120190 | 0.20482 | 0.13989 | -0.0752 | -0.2192 | -0.3865 | -0.1061 | 0.36332 |
| PKH_051120 | -0.1689 | -0.1664 | -0.1801 | -0.509  | -0.1825 | -0.4533 | -1.1556 |
| PKH_072380 | -0.6322 | -0.5855 | -0.6405 | -1.0288 | -0.6771 | -0.5915 | -0.3368 |
| PKH_030380 | -0.7106 | -0.6895 | -0.6132 | -0.5381 | -0.7252 | -0.7079 | -0.8192 |
| PKH_110180 | 0.77906 | 0.60299 | 0.65235 | 0.58681 | 0.56399 | 0.39494 | 0.4142  |
| PKH_082010 | -0.0514 | -0.1284 | -0.415  | -0.4145 | -0.6326 | -0.7707 | -0.6724 |
| PKH_125440 | -0.6231 | -0.7921 | -1.1433 | -1.5419 | -1.2744 | -0.9348 | -0.4371 |
| PKH_091700 | 0.57074 | 0.54479 | 0.29345 | 0.26462 | 0.24406 | 0.13196 | 0.15959 |
| PKH_140510 | -0.7503 | -0.9546 | -0.6843 | -0.9176 | -0.6334 | -0.6588 | -0.4057 |
| PKH_126810 | 0.09161 | 0.27482 | 0.29406 | 0.18385 | 0.09894 | 0.17908 | 0.45368 |
| PKH_093740 | -0.2674 | -0.1727 | -0.1595 | 0.05112 | -0.3209 | -0.5436 | -0.6822 |
| PKH_146880 | -0.1464 | -0.0597 | -0.2259 | 0.10513 | -0.2826 | -0.168  | -0.1342 |
| PKH_146500 | -0.4285 | -0.8193 | -0.6159 | -0.5481 | 0.05663 | 0.60488 | 0.72875 |
| PKH_112620 | 0.69345 | 0.80581 | 0.85761 | 1.0034  | 0.81474 | 0.61368 | 0.72586 |
| PKH_120810 | 0.04844 | -0.0163 | -0.0171 | 0.01566 | 0.02687 | -0.0395 | 0.02655 |
| PKH_145660 | 0.84977 | 0.95932 | 0.95084 | 0.82145 | 0.60343 | 0.50776 | 0.38491 |
| PKH_124610 | 0.39467 | 0.46225 | 0.53059 | 0.54789 | 0.64443 | 0.80079 | 1.07526 |
| PKH_010140 | -0.6244 | -0.469  | -0.6088 | -0.4564 | -0.7573 | -0.8407 | -1.2544 |
| PKH_101520 | -0.6058 | -0.5333 | -0.5091 | -0.4836 | -0.555  | -0.7192 | -2.153  |
| PKH_122040 | 0.24523 | 0.10759 | 0.19499 | 0.26853 | 0.13771 | 0.05126 | -1.2795 |
| PKH_141070 | 0.02002 | -0.1397 | -0.0849 | -0.2346 | -0.1025 | -0.1552 | 0.09726 |
| PKH_123390 | -0.6692 | -0.6368 | -0.5531 | -0.1644 | -0.1953 | -0.0903 | 0.2173  |
| PKH_103230 | 1.56002 | 1.21641 | 0.92284 | 0.36585 | 0.0232  | 0.06233 | 0.64544 |
| PKH_126720 | 0.13675 | 0.06706 | -0.0289 | -0.0067 | 0.28611 | -0.1466 | -0.1335 |
| PKH_010460 | -1.074  | -0.7619 | -0.9276 | -0.4859 | -0.5094 | -0.725  | -1.8472 |
| PKH_132650 | -1.7731 | -1.5198 | -0.7835 | -0.3107 | -0.2537 | -0.112  | -0.1108 |
| PKH_111650 | -0.05   | -0.1669 | -0.0901 | -0.1168 | -0.1152 | 0.00554 | -0.0098 |
| PKH_070550 | 0.16659 | 0.06067 | -0.0175 | 0.06262 | 0.18918 | 0.21039 | 0.22531 |
| PKH_081570 | 0.58548 | 0.73852 | 0.66886 | 0.77439 | 0.55512 | 0.5345  | 0.41197 |
| PKH_083340 | -0.9323 | -0.9733 | -0.8848 | -0.8978 | -0.7389 | -0.384  | -0.541  |
| PKH_050010 | -0.3576 | 0.10689 | -0.3063 | -0.625  | -0.8082 | -0.7335 | -0.9859 |
| PKH_094540 | 0.93523 | 0.72332 | 0.89517 | 0.60784 | 0.92142 | 0.64423 | 1.61888 |
| PKH_131000 | 0.13166 | 0.03173 | -0.0016 | 0.04699 | 0.20416 | 0.15507 | 0.21033 |
| PKH_061320 | -0.0417 | -0.0464 | -0.0234 | -0.0113 | 0.09979 | 0.37098 | 0.31615 |
| PKH_094440 | -0.1301 | -0.0777 | 0.07458 | 0.00809 | 0.23928 | 0.24139 | -0.4578 |
| PKH_124960 | 0.12356 | 0.18981 | 0.42824 | 0.58106 | 0.54992 | 0.52011 | 0.20481 |
| PKH_145210 | -0.2327 | -0.316  | -0.1509 | -0.0614 | -0.2525 | -0.3038 | -1.4133 |

|            |         |         |         |         |         |         |         |
|------------|---------|---------|---------|---------|---------|---------|---------|
| PKH_112170 | 0.13112 | 0.23909 | 0.04164 | -0.2698 | -0.2014 | -0.1803 | -0.3319 |
| PKH_102240 | 0.38298 | 0.53735 | 0.74819 | 0.71699 | 0.66612 | 0.47123 | 0.3702  |
| PKH_126450 | 0.45389 | 0.80945 | 0.86307 | 0.99639 | 0.90958 | 0.74522 | 0.79096 |
| PKH_041630 | -0.1501 | -0.2686 | -0.4647 | -0.657  | -0.5974 | -0.6754 | -0.3878 |
| PKH_121720 | 0.32104 | 0.61046 | 0.89528 | 0.74707 | 0.78288 | 0.45374 | 0.17613 |
| PKH_050320 | 0.1148  | 0.04425 | -0.0189 | -0.051  | 0.0917  | -0.0345 | -0.1219 |
| PKH_094200 | 0.16565 | 0.60264 | 0.77889 | 0.74746 | 0.55127 | 0.02118 | -0.0491 |
| PKH_061710 | -0.595  | -0.5805 | -0.7781 | -0.8304 | -0.6868 | -0.5083 | -0.5846 |
| PKH_092620 | -0.4485 | -0.4757 | -0.3636 | -0.3362 | -0.5725 | -0.6228 | -1.1542 |
| PKH_071750 | -0.3866 | -0.3081 | -0.352  | -0.2857 | -0.2483 | -0.3295 | -2.2203 |
| PKH_093100 | 0.16418 | 0.38054 | 0.41152 | 0.50796 | 0.5193  | 0.15416 | 0.63538 |
| PKH_020690 | -1.3461 | -1.1404 | -1.3579 | -1.2331 | -1.4249 | -1.2202 | -1.6708 |
| PKH_072980 | 0.08965 | 0.47767 | 0.826   | 1.00905 | 0.70788 | 0.37022 | 0.40334 |
| PKH_113020 | -0.1459 | -0.0144 | -0.2547 | -0.0942 | -0.1985 | -0.1181 | -1.1413 |
| PKH_146580 | 0.00372 | -0.1022 | -0.2764 | -0.2762 | -0.0588 | 0.38569 | 0.36016 |
| PKH_141620 | 0.66882 | 0.4973  | 0.4655  | 0.37819 | 0.59213 | 0.52484 | 0.41026 |
| PKH_126860 | 0.89974 | 0.82205 | 0.77946 | 0.91407 | 0.56926 | 0.6011  | 0.71665 |
| PKH_114450 | 0.21386 | -0.0473 | 0.02318 | -0.0637 | -0.1238 | -0.0186 | -0.2828 |
| PKH_093230 | 0.64766 | 1.02242 | 1.35446 | 1.2644  | 1.25831 | 0.59046 | 0.3926  |
| PKH_094250 | -0.5667 | -0.4172 | -0.1924 | 0.16532 | -0.1256 | -0.0902 | 0.10107 |
| PKH_071570 | -0.5504 | -0.4281 | -0.6012 | -0.3298 | -0.5008 | -0.4439 | -2.0996 |
| PKH_083110 | -0.2602 | -0.3183 | -0.2958 | -0.4112 | -0.3884 | -0.4581 | -0.6183 |
| PKH_050400 | -1.3005 | -1.1373 | -0.7973 | -0.4197 | -0.5148 | -0.7055 | -0.9612 |
| PKH_021280 | 0.53101 | 0.93244 | 0.92783 | 0.81629 | 0.30871 | 0.36266 | -2.8216 |
| PKH_020310 | 0.20603 | -0.0578 | 0.03033 | 0.46125 | 0.01012 | -0.1359 | -0.7995 |
| PKH_050040 | 0.28683 | 0.16849 | -0.1206 | -0.1285 | -0.3007 | -0.0447 | 0.12975 |
| PKH_120850 | -0.0502 | 0.17208 | 0.57152 | 0.83117 | 0.91013 | 0.86694 | 0.78764 |
| PKH_102270 | -0.1316 | -0.2084 | -0.186  | -0.214  | -0.3553 | -0.2351 | -0.3193 |
| PKH_112040 | -0.1491 | -0.1302 | -0.2697 | -0.2692 | -0.424  | -0.5882 | -0.9936 |
| PKH_113230 | -0.0098 | -0.0174 | 0.04889 | 0.22454 | -0.1106 | -0.0805 | -1.436  |
| PKH_133560 | -0.141  | -0.124  | -0.0164 | 0.23902 | 0.23894 | 0.3562  | 0.75414 |
| PKH_070330 | -0.1042 | -0.3076 | -0.4346 | -0.6022 | -0.6319 | -0.7606 | -0.5144 |
| PKH_041470 | -0.0558 | -0.1232 | -0.1181 | -0.1934 | -0.1198 | -0.1622 | -0.3859 |
| PKH_102010 | -0.7584 | -0.6026 | -0.4334 | -0.4821 | -0.6471 | -0.7271 | -2.1355 |
| PKH_071700 | -0.6181 | -0.9403 | -0.5521 | -0.3859 | -0.0815 | -0.2221 | -0.1404 |
| PKH_050230 | -0.3587 | -0.2207 | -0.2834 | 0.10854 | -0.0322 | 0.15488 | -0.3773 |
| PKH_114510 | 0.52702 | 0.10837 | 0.23799 | -0.1241 | 0.47182 | 0.34595 | 0.57382 |
| PKH_040810 | 0.62147 | 0.46392 | 0.46379 | 0.26    | 0.5028  | 0.26629 | -0.1205 |
| PKH_052540 | 0.19182 | 0.81294 | 1.12966 | 0.82651 | 0.61348 | 0.56947 | 0.09429 |
| PKH_144500 | 0.55026 | 0.59109 | 0.44674 | 0.31698 | 0.15746 | -0.1087 | 0.27606 |
| PKH_093340 | -0.0694 | 0.10525 | 0.26018 | 0.12858 | 0.09579 | 0.0873  | 0.01993 |
| PKH_141030 | -0.2386 | -0.2826 | -0.1875 | -0.1025 | -0.1275 | -0.2445 | -1.6657 |
| PKH_092880 | 0.94794 | 1.27829 | 1.5157  | 1.34794 | 1.028   | 0.94316 | 0.49197 |
| PKH_132410 | -0.2181 | -0.1743 | 0.03423 | -0.2331 | -0.2553 | -0.0492 | 0.34542 |
| PKH_061610 | -0.1548 | -0.1613 | 0.03102 | -0.0479 | 0.06006 | 0.05456 | -0.1339 |
| PKH_134160 | -0.0628 | 0.07304 | 0.21005 | 0.1045  | 0.09563 | 0.03798 | -0.5421 |
| PKH_146370 | 0.40664 | 0.34222 | 0.47934 | 0.42067 | 0.59083 | 0.46444 | 0.72708 |
| PKH_131830 | -0.0832 | 0.25251 | 0.31675 | 0.20938 | 0.09105 | -0.0486 | -0.4639 |
| PKH_122810 | 0.6423  | 0.78559 | 0.2742  | 0.45519 | 0.45581 | 0.3892  | 0.75858 |
| PKH_094210 | 0.09946 | 0.28545 | 0.12972 | 0.34207 | 0.12346 | 0.16477 | 0.21135 |
| PKH_121440 | -0.0656 | -0.2838 | 0.53184 | 1.11201 | 1.26161 | 1.2265  | 1.30681 |
| PKH_080040 | -0.5224 | -0.7454 | -1.0687 | -0.9719 | -1.1003 | -0.6993 | -0.0546 |
| PKH_114740 | 0.36683 | 0.47582 | 0.45922 | 0.41622 | 0.11065 | 0.13883 | 0.01278 |
| PKH_090620 | 0.50967 | 0.56858 | 0.55992 | 0.34403 | 0.76619 | 0.43563 | 0.72373 |
| PKH_144780 | 0.36734 | 0.29124 | 0.17342 | -0.1988 | -0.294  | -0.1596 | 0.2122  |
| PKH_052080 | 0.50748 | 0.6621  | 0.56204 | 0.71704 | 0.41058 | 0.36547 | 0.32679 |
| PKH_122770 | -0.8626 | -0.5633 | -0.0705 | 0.30148 | 0.6312  | 0.62992 | 0.23192 |
| PKH_020360 | -0.8019 | -0.7457 | -0.79   | -0.5128 | -0.8271 | -1.084  | -0.9812 |
| PKH_081780 | 0.05745 | -0.1868 | -0.4476 | -0.4485 | -0.992  | -0.4398 | -0.0548 |
| PKH_011180 | -0.8959 | 0.1857  | -0.0879 | 0.18284 | 0.05237 | -0.1119 | -0.6592 |
| PKH_133400 | 0.18876 | 0.47096 | 0.09728 | 0.12583 | 0.17872 | 0.06336 | 0.13112 |
| PKH_080830 | -0.1057 | -0.0366 | 0.03761 | 0.10997 | -0.1832 | -0.2787 | -0.3404 |
| PKH_141270 | -0.3561 | -0.6724 | -0.3134 | -0.249  | 0.05235 | 0.25075 | 0.16198 |

|            |         |         |         |         |         |         |         |
|------------|---------|---------|---------|---------|---------|---------|---------|
| PKH_060580 | 0.39829 | 0.23752 | 0.18401 | 0.3233  | 0.62354 | 1.08893 | 0.94252 |
| PKH_080410 | 0.04446 | 0.2402  | 0.05965 | -0.0682 | 0.22826 | -0.0511 | -0.0553 |
| PKH_010630 | -0.6105 | -0.3529 | -0.4112 | -0.431  | -0.6176 | -0.6046 | -0.827  |
| PKH_142290 | -0.2261 | 0.08041 | 0.22525 | 0.14024 | 0.04277 | -0.1055 | 0.26353 |
| PKH_041480 | -0.2463 | 0.05517 | 0.29151 | 0.08882 | 0.03751 | -0.1622 | -0.1949 |
| PKH_021170 | -0.5371 | -0.3654 | -0.1784 | 0.24581 | -0.2005 | -0.0734 | -0.4161 |
| PKH_040280 | 0.0436  | 0.19693 | 0.61954 | 0.85641 | 0.3425  | -0.1057 | -0.2223 |
| PKH_060600 | -1.2139 | -1.0654 | -0.9985 | -0.8549 | -0.4343 | -0.3395 | -1.2596 |
| PKH_071050 | 0.86241 | 1.17302 | 0.8642  | 0.64193 | 0.46455 | 0.52913 | 0.6733  |
| PKH_021250 | -0.3923 | -0.4053 | -0.0582 | 0.111   | 0.07211 | 0       | -0.5571 |
| PKH_070620 | 0.12862 | 0.14026 | 0.0326  | -0.2186 | -0.3051 | -0.3486 | -0.1381 |
| PKH_112030 | 0.72914 | 0.80041 | 0.63128 | 0.57518 | 0.27632 | 0.09326 | -0.4406 |
| PKH_122200 | 0.3031  | 0.30996 | 0.94468 | 1.07442 | 0.75275 | 0.16657 | -0.398  |
| PKH_080140 | -0.3491 | -0.2321 | 0.23767 | 0.53174 | 0.75788 | 0.69559 | 0.63971 |
| PKH_130940 | -0.056  | -0.1567 | -0.2255 | -0.0757 | 0.08145 | -0.0617 | 0.04647 |
| PKH_131880 | -0.0095 | 0.12511 | 0.44059 | 0.68837 | 0.55893 | 0.45586 | 0.4058  |
| PKH_131670 | -0.3319 | -0.4586 | -0.5149 | -0.5481 | -0.3902 | -0.2349 | -0.1912 |
| PKH_100860 | -0.6866 | -0.3145 | -0.1038 | 0.15434 | 0.12109 | 0.03461 | 0.02016 |
| PKH_126970 | 0.38847 | 0.38872 | 0.39211 | 0.39054 | 0.3144  | 0.44888 | 0.42257 |
| PKH_124870 | -0.0985 | 0.07416 | 0.25128 | 0.39389 | 0.21609 | 0.12374 | -0.0705 |
| PKH_073310 | 0.23891 | 0.52565 | 0.60794 | 0.43915 | 0.31932 | 0.29639 | 0.31152 |
| PKH_031450 | -0.3137 | -0.5849 | -0.7172 | -0.781  | -0.362  | -0.3424 | -0.8255 |
| PKH_040550 | 0.48481 | 0.33713 | 0.43114 | 0.42745 | 0.31954 | 0.30951 | 0.75263 |
| PKH_143020 | -0.5839 | -0.8753 | -1.0793 | -1.1907 | -0.9053 | -0.5528 | -0.0694 |
| PKH_102150 | 0.20942 | -0.1004 | 0.09334 | 0.12356 | 0.17822 | 0.16783 | -0.3064 |
| PKH_070320 | 0.3904  | 0.67938 | 1.03077 | 0.66939 | 0.90262 | 0.99783 | 0.70957 |
| PKH_133110 | 0.07364 | -0.0438 | -0.1597 | 0.11389 | 0.10627 | -0.0862 | 0.14699 |
| PKH_070780 | -0.1197 | -0.2213 | -0.2493 | -0.317  | -0.1655 | -0.2398 | -0.1235 |
| PKH_122320 | 0.26456 | 0.10797 | 0.10616 | -0.0193 | 0.10164 | 0.239   | 0.44871 |
| PKH_121030 | 0.77358 | 0.79904 | 0.87761 | 0.69315 | 0.98439 | 0.93989 | 0.87464 |
| PKH_133590 | 0.12378 | 0.15834 | 0.37294 | 0.57825 | 0.18933 | -0.0544 | 0.23693 |
| PKH_030090 | 0.11534 | 0.09656 | -0.1945 | -0.3101 | -0.3475 | -0.212  | -0.4431 |
| PKH_143140 | -0.2482 | -0.2982 | 0.06056 | 0.26178 | 0.501   | 0.21583 | 0.26638 |
| PKH_091360 | 0.06355 | -0.0349 | -0.0719 | -0.1849 | -0.3294 | -0.3609 | 0.13173 |
| PKH_126410 | 0.89763 | 1.00245 | 0.75641 | 0.77538 | 0.71508 | 0.33796 | 0.33784 |
| PKH_141130 | 0.07632 | 0.13117 | 0.24347 | 0.13936 | 0.35116 | 0.33658 | 0.37173 |
| PKH_114290 | 0.74494 | 0.85719 | 0.51404 | 0.862   | 0.77036 | 1.03337 | 0.98237 |
| PKH_112290 | -0.9496 | -0.9018 | -0.8844 | -0.9772 | -0.8287 | -0.6658 | -0.7384 |
| PKH_132860 | -0.0486 | -0.0487 | -0.2046 | -0.3504 | -0.3326 | -0.246  | -0.1741 |
| PKH_113800 | 0.73074 | 0.76135 | 0.92513 | 0.95305 | 0.64784 | 0.38788 | 0.42995 |
| PKH_134190 | -0.3606 | -0.2959 | -0.2901 | -0.3878 | -0.2469 | -0.2768 | -0.3751 |
| PKH_061430 | 0.61578 | 0.99251 | 0.98865 | 0.94449 | 0.47282 | 0.25569 | 0.53407 |
| PKH_130620 | -0.0323 | -0.0418 | -0.0571 | 0.11298 | 0.04422 | 0.08977 | -1.1233 |
| PKH_020170 | 0.18424 | 0.23717 | 0.29135 | 0.25104 | 0.01035 | 0.1856  | -0.0029 |
| PKH_111190 | 0.43787 | 0.48887 | 0.66265 | 0.3981  | 0.28094 | 0.1266  | -0.3404 |
| PKH_110200 | 0.10477 | 0.33105 | 0.24951 | 0.22508 | 0.11722 | -0.0833 | 0.21187 |
| PKH_050950 | -0.3284 | -0.368  | -0.5634 | -0.5135 | -0.6388 | -1.059  | -0.9696 |
| PKH_140990 | 0.6923  | 0.94344 | 0.51625 | 0.40222 | 0.2893  | 0.28023 | 0.25496 |
| PKH_132900 | 0.5037  | 0.34613 | 0.55076 | 0.72186 | 0.59368 | 0.45978 | 0.39353 |
| PKH_122850 | 0.2923  | 0.17835 | 0.26962 | 0.18703 | 0.16255 | 0.12987 | 0.57254 |
| PKH_122370 | 0.17377 | 0.07149 | 0.0713  | 0.00064 | -0.1108 | -0.2468 | -0.146  |
| PKH_100580 | 0.36405 | 0.21697 | 0.29974 | 0.39342 | 0.35782 | 0.23892 | 0.52475 |
| PKH_122130 | 0.38553 | 0.54285 | 0.79631 | 0.90002 | 0.74311 | 0.56146 | 0.33139 |
| PKH_020460 | 0.35097 | 0.40893 | 0.24865 | 0.14878 | -0.0666 | -0.4466 | -0.8142 |
| PKH_061040 | -1.0897 | -1.2482 | -0.9942 | -0.2174 | 0.27585 | 0.42045 | 0.13665 |
| PKH_114750 | 0.72499 | 1.09631 | 0.69508 | 0.58722 | 0.06982 | -0.2742 | -0.4953 |
| PKH_142830 | 0.76864 | 0.82974 | 0.76474 | 0.56598 | 0.32413 | -0.0123 | -0.1054 |
| PKH_142370 | -0.3168 | -0.3369 | -0.4052 | -0.3281 | -0.2503 | -0.4954 | -1.3448 |
| PKH_102190 | 0.11612 | 0.43895 | 0.35429 | 0.24145 | 0.31442 | 0.05179 | -0.1819 |
| PKH_070006 | 0.51823 | 0.44922 | -0.1318 | -0.4567 | -0.3174 | 0.20875 | 0.60422 |
| PKH_020180 | -0.4076 | -0.2436 | -0.2796 | -0.0672 | -0.0961 | 0.07074 | 0.26991 |
| PKH_120600 | 0.24043 | 0.20848 | 0.13678 | -0.0788 | -0.1427 | -0.1348 | -0.0668 |
| PKH_030840 | -1.4965 | -2.0292 | -1.5466 | -0.4561 | 0.64071 | 0.81259 | 0.06671 |

|            |         |         |         |         |         |         |         |
|------------|---------|---------|---------|---------|---------|---------|---------|
| PKH_093670 | 0.28543 | 0.02426 | 0.05105 | 0.18485 | 0.149   | 0.28467 | 0.39206 |
| PKH_121290 | 0.03358 | 0.13118 | 0.40688 | 0.48152 | 0.55602 | 0.3498  | 0.35876 |
| PKH_124860 | -1.0503 | -0.9928 | -0.9228 | -0.6593 | -0.6828 | -0.4971 | -0.4023 |
| PKH_081060 | 0.24932 | 0.33107 | 0.33718 | 0.28855 | 0.40768 | 0.25696 | -0.9775 |
| PKH_145120 | 0.2297  | 0.21693 | 0.09539 | 0.032   | 0.10886 | -0.0192 | -0.1443 |
| PKH_101850 | -0.2687 | -0.2322 | -0.3808 | -0.2561 | -0.193  | -0.145  | -0.1368 |
| PKH_020630 | 0.18321 | 0.50433 | 0.36663 | 0.33802 | 0.09561 | -0.0411 | -0.7925 |
| PKH_143940 | 0.3932  | 0.46003 | 0.3856  | 0.15115 | 0.05272 | 0.22096 | 0.13243 |
| PKH_081120 | -1.2974 | -1.4252 | -1.3677 | -1.504  | -1.2217 | -1.005  | -0.9626 |
| PKH_082420 | -1.4323 | -1.1425 | -1.2395 | -1.0703 | -0.6908 | -0.6691 | -1.1679 |
| PKH_052740 | -0.0686 | -0.2929 | -0.455  | -0.5334 | -0.1646 | 0.36472 | 0.48558 |
| PKH_113190 | -0.5068 | -0.6453 | -1.0613 | -1.0615 | -0.7608 | -0.4907 | -0.7257 |
| PKH_122760 | -0.0263 | -0.1021 | -0.2405 | -0.3673 | -0.3313 | -0.5554 | -0.3524 |
| PKH_072870 | -1.277  | -1.3931 | -1.532  | -0.9093 | -0.7354 | -0.1284 | -0.2374 |
| PKH_080110 | 0.07714 | 0.16353 | 0.2507  | -0.1229 | -0.1405 | -0.3221 | -0.2734 |
| PKH_030940 | -0.8469 | -1.0983 | -1.2531 | -0.7945 | -0.5296 | -0.0182 | -0.1899 |
| PKH_092210 | -0.2326 | -0.3782 | -0.2775 | -0.0941 | -0.0993 | -0.2149 | -0.2657 |
| PKH_051350 | -0.0613 | -0.2872 | -0.3124 | -0.5069 | -0.416  | -0.5315 | -0.0078 |
| PKH_114100 | -0.383  | -0.4168 | -0.4912 | -0.2332 | -0.7456 | -0.6446 | -1.6386 |
| PKH_124000 | -0.0134 | -0.0229 | 0.29066 | -0.0471 | 0.06926 | -0.0977 | -0.1484 |
| PKH_091410 | 0.14702 | -0.1744 | -0.6765 | -1.4536 | -1.5891 | -1.5247 | -1.0217 |
| PKH_132590 | -0.3341 | -0.0593 | -0.2113 | -0.415  | -0.3819 | -0.4117 | -0.5343 |
| PKH_131530 | 0.66388 | 0.7133  | 0.69809 | 0.71844 | 0.77418 | 0.69982 | 1.04771 |
| PKH_140780 | 0.36442 | 0.24304 | 0.11239 | 0.2694  | 0.09253 | -0.1068 | 0.12173 |
| PKH_122520 | 0.85899 | 0.95249 | 0.89589 | 0.84906 | 0.40928 | -0.045  | 0.14151 |
| PKH_051340 | 0.31474 | 0.35292 | 0.21584 | 0.48007 | 0.04078 | 0.0806  | 0.75764 |
| PKH_052420 | -0.4879 | -0.967  | -1.262  | -1.3599 | -1.0316 | -0.9642 | -0.6396 |
| PKH_126130 | 1.11727 | 1.68799 | 1.98057 | 1.961   | 1.14874 | 0.50744 | 0.27389 |
| PKH_020860 | -1.1958 | -1.1174 | -1.2809 | -1.1551 | -1.1356 | -1.3527 | -1.7163 |
| PKH_061600 | 0.06463 | 0.16476 | 0.61383 | 0.40243 | 0.18307 | 0.60024 | 0.26573 |
| PKH_141250 | -0.1418 | 0.0415  | 0.09798 | 0.1082  | 0.01814 | 0.27303 | -1.1866 |
| PKH_146420 | -0.3082 | -0.1397 | -0.1237 | -0.1201 | -0.2444 | -0.1232 | 0.08263 |
| PKH_050870 | 0.12985 | 0.32096 | 0.2266  | -0.0532 | -0.0657 | -0.5593 | -0.7349 |
| PKH_146340 | 0.87713 | 0.76963 | 0.74816 | 0.80829 | 0.56939 | -0.4336 | 0.15624 |
| PKH_083440 | 0.39915 | 0.23354 | 0.29484 | 0.46001 | 0.59977 | 0.65706 | 0.57252 |
| PKH_131580 | -0.6131 | -0.6369 | -0.0931 | 0.41027 | 0.62479 | 0.94819 | 0.75028 |
| PKH_123970 | 0.20778 | 0.30101 | -0.089  | -0.3874 | -0.3791 | -0.5377 | -0.255  |
| PKH_110770 | -0.6798 | -0.6011 | -0.9689 | -0.5149 | -0.9768 | -0.8314 | -1.0525 |
| PKH_126490 | 0.03209 | 0.20614 | 0.26122 | 0.35238 | 0.51088 | 0.26037 | 0.13956 |
| PKH_123910 | 0.32277 | 0.40131 | 0.29865 | 0.24852 | 0.25724 | 0.50122 | -0.8588 |
| PKH_030820 | -0.11   | 0.18104 | 0.36214 | 0.33937 | 0.49452 | 0.36563 | 0.07383 |
| PKH_146490 | -0.4066 | -0.8014 | -1.0837 | -1.0469 | -0.4728 | -0.0621 | 0.00054 |
| PKH_080150 | 0.23721 | 0.11968 | 0.04587 | 0.01834 | 0.17897 | -0.0127 | 0.22736 |
| PKH_143740 | 0.4312  | 0.47926 | 0.57638 | 0.60093 | 0.46241 | 0.43035 | 0.53294 |
| PKH_051930 | 0.77333 | 0.84714 | 0.70962 | 0.45943 | 0.50582 | 0.33899 | 0.38563 |
| PKH_010360 | -1.2866 | -1.0911 | -1.2734 | -1.0151 | -1.0602 | -0.9109 | -1.6992 |
| PKH_090800 | -0.2725 | -0.315  | 0.21292 | 0.6813  | 0.78359 | 0.4735  | 0.89338 |
| PKH_100770 | -0.2051 | -0.2078 | -0.5001 | -0.7368 | -0.8126 | -0.9174 | -0.9591 |
| PKH_114830 | -0.1553 | -0.7631 | -1.1288 | -2.1609 | -1.7284 | -1.0139 | 0.23523 |
| PKH_133450 | 0.40262 | 0.36758 | 0.59046 | 0.33094 | 0.5387  | 0.43135 | 0.51486 |
| PKH_072730 | 0.74544 | 1.13325 | 0.96263 | 0.85343 | 0.69414 | 0.44757 | 0.34541 |
| PKH_082240 | -0.3661 | -0.4323 | -0.6623 | -1.2101 | -0.7405 | -0.6613 | -0.9391 |
| PKH_122950 | -0.0475 | -0.044  | 0.17873 | 0.05814 | -0.1367 | -0.3267 | 0.18389 |
| PKH_111610 | 0.46897 | 0.29656 | 0.1139  | 0.0618  | 0.18139 | 0.14293 | -0.2321 |
| PKH_060360 | -1.3346 | -1.4298 | -1.3358 | -1.1736 | -0.7365 | -0.3755 | -0.8735 |
| PKH_041340 | -0.8961 | -1.0024 | -1.2761 | -1.5515 | -1.312  | -1.2536 | -0.9485 |
| PKH_021330 | 0.25385 | 0.217   | 0.16826 | 0.1559  | 0.36016 | 0.06952 | -0.0353 |
| PKH_094270 | -0.5852 | -0.6761 | -0.6487 | -0.5776 | -0.5459 | -0.447  | -0.6671 |
| PKH_080020 | 0.77638 | 0.27387 | 0.12205 | 0.42833 | 0.36215 | 0.60523 | 0.75832 |
| PKH_114210 | 0.56469 | 1.14397 | 1.27174 | 1.32859 | 0.93749 | 0.66346 | 0.41807 |
| PKH_081320 | -0.2846 | -0.3193 | -0.3859 | -0.2373 | 0.15946 | -0.1836 | -0.5511 |
| PKH_125480 | -0.0035 | 0.37314 | 0.30693 | 0.5453  | 0.26508 | 0.13042 | 0.08143 |
| PKH_081670 | 0.43963 | 0.4343  | 0.44534 | 0.36589 | 0.59492 | 0.50633 | 0.62005 |

|            |         |         |         |         |         |         |         |
|------------|---------|---------|---------|---------|---------|---------|---------|
| PKH_090490 | 0.00053 | 0.10847 | -0.0809 | 0.12012 | 0.00316 | 0.21175 | -1.3659 |
| PKH_102020 | -0.3987 | -0.3637 | -0.3828 | -0.1422 | -0.2788 | -0.6115 | -1.8541 |
| PKH_131210 | -0.5931 | -0.5084 | 0.0278  | 0.07601 | -0.0561 | -0.2537 | -0.0768 |
| PKH_110150 | -0.195  | 0.11689 | 0.28611 | 0.14822 | 0.00761 | 0.0212  | -1.5467 |
| PKH_123200 | -0.0148 | 0.02953 | -0.0925 | 0.05608 | -0.4637 | 0.07139 | -0.6712 |
| PKH_143700 | 0.06206 | 0.15726 | 0.16934 | 0.07025 | -0.0083 | 0.05505 | -0.1389 |
| PKH_081080 | -1.2779 | -0.9235 | -0.8167 | -0.6736 | -0.7507 | -0.8536 | -2.4171 |
| PKH_131840 | 0.06419 | 0.39053 | 0.46528 | 0.36528 | 0.2831  | 0.20839 | -0.2931 |
| PKH_141980 | -0.1721 | 0.01026 | 0.07716 | 0.2266  | 0.07818 | -0.1055 | -0.2968 |
| PKH_010990 | -0.9689 | -0.932  | -0.9044 | -0.835  | -0.9459 | -1.017  | -0.874  |
| PKH_120450 | -0.793  | -0.4218 | -0.415  | -0.4093 | -0.5596 | -0.7593 | -1.1802 |
| PKH_092440 | 0.25527 | -0.0881 | -0.4369 | -0.3811 | -0.4277 | -0.0162 | 0.39166 |
| PKH_060350 | -0.6926 | -0.8053 | -0.5158 | -0.3504 | -0.4331 | -0.0887 | -0.0835 |
| PKH_144190 | -0.0533 | -0.0954 | -0.022  | 0.12207 | -0.0945 | -0.2522 | -0.6066 |
| PKH_081890 | -0.0454 | 0.22565 | 0.63871 | 0.67247 | 0.73063 | 0.84081 | 0.51532 |
| PKH_051020 | -0.14   | 0.0406  | -0.0383 | 0.00519 | -0.1835 | -0.3368 | -0.4476 |
| PKH_070200 | 0.43228 | 0.55229 | 0.5703  | 0.75786 | 0.84667 | 0.69351 | 0.72617 |
| PKH_071940 | 0.32671 | 0.09962 | -0.0518 | -0.3617 | -0.1899 | -0.1659 | -0.1571 |
| PKH_134220 | 0.32287 | 0.17233 | 0.16229 | 0.04942 | 0.35438 | 0.79836 | 0.81524 |
| PKH_131030 | 0.36471 | 0.26316 | 0.241   | 0.13166 | 0.26523 | 0.29605 | 0.06084 |
| PKH_144200 | -0.3076 | -0.4803 | -0.4651 | -0.7033 | -0.695  | -0.7492 | -0.644  |
| PKH_052710 | 0.03434 | -0.0344 | 0.04642 | -0.3393 | 0.32836 | 0.01536 | -0.2382 |
| PKH_122090 | -0.2119 | 0.04617 | 0.3238  | 0.3236  | 0.0454  | 0.00519 | 0.02645 |
| PKH_142020 | 0.58778 | 0.76155 | 0.81351 | 0.86031 | 0.94664 | 0.78778 | 1.52499 |
| PKH_141870 | 0.14923 | 0.40386 | 0.44613 | 0.82784 | 0.64704 | 0.26136 | 0.40582 |
| PKH_126680 | -0.7281 | -0.5766 | -0.4436 | -0.9723 | 0.05114 | 0.51431 | 0.35157 |
| PKH_071240 | -0.0098 | 0.19631 | 0.11415 | 0.07626 | -0.0185 | -0.1814 | -0.3469 |
| PKH_082090 | -0.6294 | -0.4397 | 0.0575  | 0.29005 | -0.2537 | 0.03173 | -0.7134 |
| PKH_091740 | 0.83315 | 0.48764 | 0.43135 | 0.12932 | -0.0264 | -0.0458 | 0.09002 |
| PKH_090210 | -1.0374 | -1.4069 | -1.5585 | -1.3832 | -0.3223 | 0.37513 | 0.09977 |
| PKH_111540 | 0.01841 | -0.038  | -0.0586 | -0.0837 | 0.08446 | -0.0708 | -0.0298 |
| PKH_041680 | -0.1389 | -0.244  | -0.0883 | -0.1095 | -0.0912 | 0.06668 | -0.3061 |
| PKH_111360 | 0.10249 | 0.128   | 0.30106 | 0.23357 | 0.12273 | 0.19319 | -0.0817 |
| PKH_142200 | 0.53526 | 0.50379 | 0.41148 | 0.28501 | 0.2539  | 0.48209 | 1.07523 |
| PKH_083420 | 0.12059 | 0.19657 | 0.21277 | 0.17903 | 0.30519 | 0.34117 | -0.0324 |
| PKH_041330 | -0.0982 | -0.1951 | -0.2626 | -0.1187 | -0.3958 | -0.4435 | -0.3526 |
| PKH_131930 | -0.2499 | -0.0486 | 0.04577 | -0.0012 | -0.1299 | -0.0173 | -0.1214 |
| PKH_102680 | 0.11028 | 0.46939 | 0.20302 | -0.0185 | 0.14582 | 0.04494 | 0.15239 |
| PKH_121540 | 0.26876 | 0.21033 | 0.14424 | 0.10535 | 0.04869 | 0.07973 | -0.1552 |
| PKH_072140 | 0.21355 | 0.4557  | 0.53798 | 0.40825 | 0.27717 | 0.09035 | -0.6167 |
| PKH_114500 | -0.2869 | -0.2019 | -0.3502 | -0.1383 | -0.3709 | -0.2618 | -0.1888 |
| PKH_051310 | -0.6003 | -0.6649 | -0.5065 | -0.6632 | -0.5881 | -0.5529 | -0.6942 |
| PKH_125870 | -0.0405 | 0.11959 | 0.17425 | 0.44564 | 0.14911 | -0.048  | 0.13184 |
| PKH_090050 | 0.10701 | 0.16158 | 0.15286 | 0.15767 | 0.05637 | 0.16676 | -0.1222 |
| PKH_144700 | 0.20481 | 0.03057 | 0.0698  | -0.0474 | -0.0177 | -0.0294 | -0.7957 |
| PKH_051380 | -0.493  | -0.6387 | -0.8469 | -0.8087 | -0.5626 | 0.20179 | 0.34074 |
| PKH_112500 | -0.4105 | -0.1062 | -0.0522 | 0.04509 | 0.24188 | -0.2459 | -0.6777 |
| PKH_083200 | -0.0219 | 0.02021 | 0.16879 | 0.08508 | 0.05745 | -0.025  | 0.15627 |
| PKH_142170 | 0.34465 | 0.14278 | 0.20622 | 0.26176 | 0.43343 | 0.36366 | 0.10083 |
| PKH_082630 | -0.5161 | -0.2167 | -0.3544 | -0.0948 | 0.11389 | -0.0767 | -0.6371 |
| PKH_050710 | -0.4481 | -0.3741 | -0.3866 | -0.149  | -0.1011 | -0.8578 | -1.2635 |
| PKH_010170 | -0.4487 | -0.6843 | -0.7909 | -1.1864 | -1.2143 | -1.1343 | -1.3932 |
| PKH_071200 | -0.1699 | -0.3016 | -0.4811 | -0.4058 | -0.4697 | -0.5228 | -0.5105 |
| PKH_090440 | 0.00494 | -1.0357 | -0.1493 | -0.0079 | -0.0149 | -0.0252 | -0.1749 |
| PKH_140270 | -0.3401 | -0.153  | 0.10629 | 0.43853 | 0.31009 | 0.12654 | 0.01298 |
| PKH_131610 | -0.0073 | -0.0583 | -0.2483 | -0.1807 | -0.1799 | -0.188  | -0.119  |
| PKH_091240 | 0.6084  | 0.36303 | 0.3757  | 0.7923  | 0.74316 | 0.62278 | 0.57713 |
| PKH_080480 | -0.2884 | -0.1726 | -0.114  | -0.0015 | 0.04236 | -0.2603 | -1.9249 |
| PKH_140220 | 0.33509 | 0.58516 | 0.63745 | 0.59859 | 0.65219 | 0.74265 | 0.83884 |
| PKH_145100 | -0.1601 | -0.1769 | -0.1895 | -0.41   | -0.2206 | -0.1644 | -0.2385 |
| PKH_121650 | 0.09465 | -0.0849 | -0.0026 | -0.1891 | -0.3723 | -0.3125 | -0.3196 |
| PKH_112670 | 0.22848 | 0.22069 | 0.00696 | 0.10458 | 0.09433 | -0.0188 | -0.141  |
| PKH_051000 | -1.5547 | -1.4807 | -1.1841 | -0.8042 | -0.6091 | -0.3175 | -0.3434 |

|            |         |         |         |         |         |         |         |
|------------|---------|---------|---------|---------|---------|---------|---------|
| PKH_101020 | 0.61493 | 0.19878 | 0.13481 | 0.42464 | 0.66153 | 0.8924  | 1.25844 |
| PKH_112370 | -0.9976 | -1.2892 | -1.4415 | -0.3045 | -1.478  | -1.4247 | -1.803  |
| PKH_010650 | -0.8213 | -0.8476 | -0.8283 | -0.8429 | -0.6773 | -0.369  | -0.7604 |
| PKH_132680 | 0.00544 | 0.03386 | -0.1495 | -0.2617 | -0.3233 | -0.2859 | -0.3329 |
| PKH_145040 | -0.2348 | -0.2993 | -0.0589 | 0.03565 | 0.02589 | 0.15738 | 0.29277 |
| PKH_124980 | -1.8102 | 0.26303 | 0.301   | 0.14814 | 0.03067 | 0.08114 | -0.024  |
| PKH_125000 | 0.00098 | 0.14613 | -0.0157 | -0.0082 | -0.2388 | -0.0363 | -0.7729 |
| PKH_050370 | -0.9615 | -1.0274 | -0.8681 | -0.8106 | -0.9249 | -0.8348 | -1.3036 |
| PKH_061500 | 0.06049 | -0.0761 | -0.0778 | -0.0267 | -0.1636 | -0.3581 | 0.13725 |
| PKH_133670 | 0.41912 | 0.41295 | 0.27087 | 0.27213 | 0.19967 | 0.48781 | 0.59726 |
| PKH_111440 | 0.1506  | 0.23717 | 0.52835 | 0.76341 | 0.5012  | 0.65538 | 0.48393 |
| PKH_123700 | -0.8239 | -1.4813 | -1.9285 | -1.164  | 0.00456 | 1.12658 | 1.08204 |
| PKH_073080 | 0.29432 | 0.30895 | 0.15551 | 0.21642 | -0.036  | 0.10823 | 0.02614 |
| PKH_070340 | 0.454   | 0.88256 | 1.01494 | 1.60807 | 1.66337 | 1.37827 | 1.10293 |
| PKH_145410 | -0.3332 | -0.5302 | -0.4247 | -0.4963 | -0.5165 | -0.4554 | -0.3634 |
| PKH_100530 | 0.1328  | 0.18366 | 0.29282 | 0.2162  | 0.00657 | 0.06233 | -0.0904 |
| PKH_082250 | -0.106  | -0.1096 | -0.2825 | -0.1657 | -0.2323 | -0.1581 | -0.3779 |
| PKH_110600 | 0.57937 | 0.32074 | 0.44786 | 0.48002 | 0.17101 | 0.32942 | 0.61363 |
| PKH_061100 | 0.06118 | -0.3406 | -0.7047 | -0.7729 | 0.15332 | 0.59392 | 0.75919 |
| PKH_083820 | 0.43174 | 0.1619  | -0.1237 | -0.1202 | -0.1604 | -0.1397 | 0.45052 |
| PKH_072880 | -0.6855 | -0.8041 | -0.8231 | -0.9029 | -0.6533 | -0.4284 | -0.1371 |
| PKH_071300 | 0.14433 | 0.52499 | 0.50082 | 0.5985  | 0.42182 | 0.58435 | 0.17294 |
| PKH_082280 | 0.15401 | 0.18266 | 0.13858 | 0.30756 | 0.25176 | 0.01176 | 0.34004 |
| PKH_091780 | 0.18433 | -0.1238 | -0.4714 | -0.4822 | -0.5314 | -0.0443 | 0.7872  |
| PKH_141710 | 0.11715 | 0.07454 | -0.0458 | -0.1386 | -0.128  | -0.1791 | 0.20152 |
| PKH_126600 | 0.60654 | 0.59479 | 0.59897 | 0.45092 | 0.37955 | 0.23845 | 0.07161 |
| PKH_061490 | 0.15985 | 0.2414  | 0.15364 | -0.0173 | -0.0089 | -0.0935 | 0.08523 |
| PKH_102480 | -0.3447 | -0.2189 | -0.311  | -0.1242 | 0.00295 | -0.044  | -0.2073 |
| PKH_093130 | 0.8551  | 0.99239 | 0.89483 | 0.51753 | 0.23614 | 0.10106 | 0.17474 |
| PKH_123100 | 0.15976 | -0.0224 | -0.1877 | 0.01294 | -0.1233 | 0.15085 | 0.09617 |
| PKH_072620 | 0.77017 | 0.62765 | 0.58604 | 0.70039 | 0.72684 | 0.68536 | 0.93059 |
| PKH_140010 | 0.09453 | -0.3994 | -0.805  | -1.2184 | -0.3413 | 1.09699 | 1.87152 |
| PKH_124270 | 0.49416 | 0.41341 | 0.27787 | 0.49983 | 0.05559 | 0.28101 | 0.59847 |
| PKH_011490 | -1.357  | -1.3359 | -1.5694 | -1.4178 | -0.7863 | -0.7793 | -1.1367 |
| PKH_141690 | 0.57598 | 0.55137 | 0.39449 | 0.22912 | 0.14885 | 0.42069 | 0.88074 |
| PKH_080660 | 0.27321 | 0.34352 | 0.21647 | 0.22659 | 0.30647 | 0.43999 | 0.37804 |
| PKH_121120 | -0.4508 | -0.1804 | -0.1807 | 0.13913 | 0.07725 | 0.09217 | -0.4586 |
| PKH_144980 | -0.3881 | -0.3177 | -0.136  | 0.13923 | 0.41226 | 0.22843 | 0.05138 |
| PKH_146610 | 0.12357 | 0.29459 | 0.49016 | 0.41839 | 0.33818 | 0.20922 | 0.47133 |
| PKH_062100 | -0.984  | -0.4457 | -0.0956 | 0.42328 | 0.13604 | 0.2084  | -0.2206 |
| PKH_100060 | 0.77074 | 0.66504 | 0.42567 | 0.44834 | 0.51528 | 0.37786 | 0.2304  |
| PKH_142460 | 0.17028 | 0.14411 | 0.29532 | 0.15703 | 0.27185 | 0.0963  | 0.38204 |
| PKH_133890 | 0.91529 | 1.00724 | 0.76232 | 0.65863 | 0.48764 | 0.41559 | 1.0201  |
| PKH_142430 | 0.47475 | 0.42085 | 0.35435 | 0.31059 | 0.4323  | 0.34181 | -0.9491 |
| PKH_060980 | -0.3866 | -0.2822 | -0.1973 | -0.1067 | -0.1497 | -0.2839 | -0.5208 |
| PKH_143840 | 0.1678  | 0.16306 | 0.17397 | 0.43496 | 0.34357 | 0.32481 | 0.43384 |
| PKH_143340 | 1.00833 | 0.53202 | 0.68792 | 0.22817 | 0.27214 | 0.79888 | 1.42339 |
| PKH_102670 | 0.33728 | 0.38    | 0.6895  | 0.2287  | 0.07622 | 0.31261 | 0.43352 |
| PKH_041660 | 0.22055 | 0.33181 | 0.32059 | 0.43794 | 0.2164  | 0.09834 | -0.2874 |
| PKH_144970 | 0.56733 | 0.2086  | 0.23102 | 0.03352 | 0.0301  | 0.29415 | 0.27958 |
| PKH_114030 | -0.363  | -0.2434 | -0.376  | 0.04543 | -0.2679 | -0.1067 | -1.4458 |
| PKH_010980 | 1.01513 | 1.49157 | 1.61019 | 1.60727 | 0.97637 | 0.38293 | 0.24764 |
| PKH_052400 | -0.431  | -0.8712 | -0.782  | 0.05677 | 1.08768 | 1.40433 | 1.34301 |
| PKH_070640 | 0.09083 | 0.22642 | 0.55964 | 0.40225 | 0.34311 | 0.33314 | 0.52624 |
| PKH_061140 | -0.262  | -0.4359 | -0.7602 | -1.03   | -0.9406 | -0.703  | -0.6301 |
| PKH_133865 | -0.4787 | -0.1174 | -0.5021 | -0.0163 | -0.0959 | -0.1441 | -1.3923 |
| PKH_011020 | -1.2506 | -1.1192 | -1.3175 | -1.2256 | -1.14   | -1.3421 | -1.7956 |
| PKH_124230 | -0.9501 | -0.4735 | 0.00359 | 0.35152 | -0.2506 | -0.0917 | -0.4366 |
| PKH_113090 | 0.56322 | 1.00797 | 0.82354 | 1.02612 | 0.65076 | 0.55994 | 0.16974 |
| PKH_114430 | 0.09496 | 0.15282 | 0.28215 | 0.59515 | 0.75445 | 0.2216  | -0.0367 |
| PKH_142010 | -0.9077 | -1.063  | -0.9511 | -0.8934 | -0.4798 | -0.2349 | -0.0247 |
| PKH_031340 | -0.187  | -0.3589 | -0.9211 | -1.1201 | -1.2695 | -1.2226 | -0.8409 |
| PKH_121920 | -0.1332 | -0.2089 | -0.2682 | 0.10468 | 0.51381 | 0.55199 | 0.67138 |



|            |         |         |         |         |         |         |         |
|------------|---------|---------|---------|---------|---------|---------|---------|
| PKH_112860 | -0.0327 | 0.30505 | 0.46025 | 0.59967 | 0.60462 | 0.33801 | 0.31668 |
| PKH_126460 | 0.31556 | 0.39215 | 0.13778 | 0.05572 | -0.1072 | -0.134  | 0.05565 |
| PKH_093490 | -0.1716 | 0.02321 | 0.04327 | -0.047  | -0.0923 | -0.2075 | -0.3108 |
| PKH_142280 | 0.18643 | 0.23197 | 0.34296 | 0.52441 | 0.49286 | 0.29225 | 0.08974 |
| PKH_101010 | 0.29055 | 0.05344 | -0.0508 | 0.15824 | 0.61323 | 0.79155 | 0.84592 |
| PKH_082430 | -0.3294 | -0.3302 | -0.3531 | -0.5027 | -0.2876 | -0.3849 | -0.4679 |
| PKH_101800 | 0.45204 | 0.3954  | 0.10542 | 0.06448 | 0.24275 | 0.15903 | 0.2916  |
| PKH_090450 | -0.3348 | -0.3242 | -0.1078 | -0.1371 | -0.0267 | -0.1687 | -0.2871 |
| PKH_061300 | 0.09478 | -0.1164 | -0.2914 | -0.3014 | 0.12111 | 0.60961 | 1.07767 |
| PKH_010930 | -0.3594 | -0.436  | -0.4674 | -0.6362 | -0.5745 | 0.22227 | 0.18632 |
| PKH_110190 | 0.97952 | 0.97812 | 1.03716 | 1.01148 | 0.50738 | 0.45417 | 0.81777 |
| PKH_102180 | -0.4309 | -0.3461 | -0.2612 | -0.1764 | 0.03247 | 0.39112 | 0.43257 |
| PKH_122690 | 0.27951 | 0.35864 | 0.46689 | 0.5651  | 0.29612 | 0.3748  | 0.34769 |
| PKH_011160 | -1.2495 | -1.2849 | -1.1401 | -1.0072 | -1.0211 | -0.8336 | -0.9528 |
| PKH_070710 | -0.1527 | -0.4998 | -0.6507 | -0.7847 | -0.3228 | 0.174   | 0.43894 |
| PKH_134120 | -0.0236 | -0.0061 | -0.1949 | -0.1297 | -0.0219 | 0.02922 | 0.04229 |
| PKH_114600 | -0.2834 | -0.5534 | -0.4305 | -0.5056 | -0.2632 | -0.2814 | -0.3216 |
| PKH_145370 | -0.2323 | -0.3802 | -0.2288 | -0.2841 | -0.1905 | 0.04059 | 0.16963 |
| PKH_147000 | 0.12325 | -0.3224 | -0.9509 | -0.7917 | -1.2859 | -0.2019 | 0.70397 |
| PKH_140640 | -0.5214 | -0.2477 | -0.3359 | -0.0075 | -0.0586 | -0.0068 | 0.18779 |
| PKH_146960 | -0.878  | -1.2152 | -1.0103 | -0.2583 | -0.3596 | -0.0161 | -0.4511 |
| PKH_050960 | -0.6548 | -0.891  | -0.7233 | -0.7745 | -0.2108 | 0.30408 | 0.61831 |
| PKH_030080 | 0.0204  | -0.0028 | -0.2045 | -0.2606 | -0.0204 | 0.16894 | 0.33702 |
| PKH_132210 | 0.18244 | -0.0009 | 0.12103 | 0.07065 | -0.0961 | -0.0726 | -0.8653 |
| PKH_071550 | 0.08972 | 0.13425 | 0.4188  | 0.27232 | 0.079   | 0.28602 | -1.1626 |
| PKH_041710 | -0.801  | -0.6886 | -0.3741 | 0.0445  | -0.1064 | -0.3854 | -0.5702 |
| PKH_030030 | -1.787  | -1.4216 | -1.6894 | -1.6537 | -1.5921 | -1.6631 | -3.4333 |
| PKH_120470 | -0.2781 | -0.5488 | -0.5286 | -0.9339 | -0.7435 | -0.7445 | -0.6392 |
| PKH_020830 | -0.0309 | 0.18444 | 0.31396 | 0.42204 | -0.0757 | -0.4481 | -0.9512 |
| PKH_092890 | -0.3986 | -0.2607 | -0.3031 | -0.39   | -0.212  | -0.1231 | -0.4345 |
| PKH_072540 | -0.2397 | -0.1313 | -0.057  | 0.01928 | 0.22166 | 0.26719 | 0.07727 |
| PKH_011240 | -2.1195 | -2.0466 | -2.0714 | -2.3969 | -2.1866 | -2.2071 | -2.6365 |
| PKH_051820 | -0.1678 | -0.4471 | -0.4681 | -0.3691 | -0.4473 | -0.4374 | -0.8315 |
| PKH_114650 | -0.4828 | -0.3048 | -0.5234 | -0.6706 | -0.6678 | -1.0654 | -1.5712 |
| PKH_113770 | 0.05314 | 0.06335 | 0.26053 | 0.24536 | -0.0251 | -0.1562 | -1.3696 |
| PKH_141170 | 0.16252 | 0.16255 | 0.38816 | 0.10364 | 0.09963 | 0.22578 | -1.1884 |
| PKH_051300 | -0.5606 | -1.1212 | -1.6421 | -2.6372 | -2.0332 | -1.0076 | -0.3115 |
| PKH_051500 | -0.6014 | -0.2569 | -0.4134 | -0.4915 | -0.5412 | -0.6576 | -1.4638 |
| PKH_050760 | -0.7891 | -0.9292 | -1.2543 | -0.5175 | -1.3648 | -0.8923 | -1.922  |
| PKH_031060 | -0.4976 | -0.5183 | 0.10417 | 0.0225  | 0.22291 | 0.32097 | -0.3006 |
| PKH_000170 | -1.4432 | -1.7408 | -1.3595 | -0.5991 | 0.07351 | 0.43434 | 0.36666 |
| PKH_051130 | 0.1848  | 0.35828 | 0.36368 | 0.15646 | 0.16985 | -0.0084 | -0.1957 |
| PKH_093820 | 0.45507 | 0.53584 | 0.88358 | 1.20854 | 0.84873 | 0.77811 | 0.58511 |
| PKH_092790 | -0.8208 | -0.8986 | -1.0875 | -1.1769 | -1.3658 | -1.2649 | -1.1074 |
| PKH_133960 | -0.4265 | -0.4458 | -0.4476 | -0.4586 | -0.4726 | -0.513  | -0.4872 |
| PKH_093960 | 0.72514 | 0.92895 | 0.76686 | 0.67157 | 0.22836 | -0.0927 | -0.2846 |
| PKH_122680 | 0.15629 | 0.23125 | 0.25162 | 0.31236 | 0.25681 | 0.37121 | -0.0264 |
| PKH_123020 | 0.13699 | 0.0892  | 0.03247 | -0.0316 | 0.10919 | 0.06581 | -0.5484 |
| PKH_122970 | 1.20182 | 1.08678 | 1.00331 | 0.64934 | 0.86942 | 0.45319 | 0.60112 |
| PKH_126400 | 0.75263 | 0.7836  | 0.79173 | 0.65573 | 0.57153 | 0.33966 | 0.43169 |
| PKH_143760 | -0.2192 | -0.0341 | 0.03417 | 0.07788 | -0.2176 | -0.1509 | -0.5329 |
| PKH_114540 | 0.37864 | 0.90402 | 1.03735 | 0.96657 | 0.43953 | 0.01244 | -0.4456 |
| PKH_040050 | 0.77569 | 0.64602 | 0.63864 | 0.51575 | 0.41746 | 0.62769 | 1.09424 |
| PKH_134080 | 0.42706 | 0.68959 | 0.62724 | 0.74946 | 0.61414 | 0.38076 | 0.07628 |
| PKH_031180 | -0.2965 | 0.01848 | -0.1141 | -0.375  | -0.401  | -0.7161 | -1.3823 |
| PKH_050290 | 0.99037 | 0.80329 | 1.10276 | 0.6488  | 0.46984 | 0.50898 | -0.1016 |
| PKH_021140 | 0.40171 | 0.85118 | 0.85203 | 0.83472 | 0.70363 | 0.49267 | 0.34962 |
| PKH_093900 | -0.1512 | -0.052  | 0.06965 | 0.23873 | 0.13247 | 0.08985 | -0.1983 |
| PKH_031870 | -0.7312 | -0.3292 | -0.2218 | -0.0256 | -0.1522 | -0.2663 | -0.5653 |
| PKH_113970 | 0.36622 | 0.44318 | 0.47849 | 0.77356 | 0.4761  | 0.41557 | 0.76234 |
| PKH_142990 | 0.54469 | 0.72694 | 0.91316 | 0.98523 | 0.47819 | 0.20455 | 0.28116 |
| PKH_111300 | -0.2108 | -0.0849 | 0.14227 | 0.10787 | 0.36462 | 0.07076 | -0.3264 |
| PKH_131320 | 0.15384 | 0.31663 | 0.6319  | 0.88454 | 0.63351 | 0.44454 | 0.75687 |

|            |         |         |         |         |         |         |         |
|------------|---------|---------|---------|---------|---------|---------|---------|
| PKH_121340 | 0.78437 | 1.57178 | 1.92796 | 2.04181 | 1.88354 | 1.39447 | 1.03087 |
| PKH_071000 | 0.68118 | 0.62059 | 1.06054 | 0.85379 | 0.68296 | 0.61401 | 0.77317 |
| PKH_121660 | 0.15337 | 0.10622 | 0.1626  | -0.2748 | -0.0771 | -0.18   | -0.2949 |
| PKH_010380 | -1.9714 | -1.843  | -1.6914 | -1.4126 | -1.3634 | -1.4678 | -2.5427 |
| PKH_121700 | -0.8784 | -0.991  | -1.017  | -0.9794 | -0.8689 | -0.936  | -0.8271 |
| PKH_140130 | 0.71575 | 0.72102 | 0.54594 | 0.42958 | -0.0793 | -0.3106 | -0.0389 |
| PKH_031580 | -0.2391 | -0.0837 | -0.1959 | -0.1374 | 0.05666 | -0.1219 | -0.321  |
| PKH_120750 | 0.26461 | 0.18489 | 0.25099 | 0.25256 | 0.22023 | 0.36638 | 0.49499 |
| PKH_061380 | 0.04658 | 0.41028 | 0.58287 | 0.31426 | 0.09898 | 0.03921 | -0.1742 |
| PKH_021230 | -1.3966 | -1.559  | -1.5425 | -1.5947 | -1.4527 | -0.826  | -0.5564 |
| PKH_101610 | -0.1179 | -0.2921 | -0.2488 | -0.3935 | -0.1013 | -0.0806 | -0.1365 |
| PKH_130230 | 0.58349 | 0.61526 | 0.50199 | 0.47866 | 0.45189 | 0.29715 | 0.5201  |
| PKH_110650 | -0.4121 | -0.4477 | -0.5636 | -0.6598 | -0.4613 | -0.4058 | -0.0751 |
| PKH_141050 | -0.7595 | -1.1094 | -1.2241 | -1.4171 | -1.1324 | -0.9511 | -0.5741 |
| PKH_122900 | -0.2658 | -0.104  | 0.13473 | 0.53336 | 0.50838 | 0.54341 | 0.6311  |
| PKH_142850 | -0.1513 | 0.02395 | 0.24184 | 0.91651 | 0.33872 | 0.21439 | 0.06276 |
| PKH_130770 | 0.34716 | 0.20273 | 0.09401 | 0.40193 | 0.27752 | 0.14361 | 0.24509 |
| PKH_094510 | 0.22235 | 0.14162 | 0.43995 | 0.37796 | 0.2618  | 0.3721  | 0.52775 |
| PKH_041200 | -0.7794 | -0.8148 | -0.7561 | -0.7632 | -0.5038 | -0.0829 | 0.14317 |
| PKH_111740 | 0.09118 | 0.18675 | -0.0099 | 0.02982 | -0.3253 | -0.4469 | -0.7756 |
| PKH_120040 | 1.31274 | 1.02363 | 0.48175 | -0.3637 | -0.3192 | 0.38077 | 1.1881  |
| PKH_093700 | -0.2285 | -0.1819 | 0.00331 | -0.1042 | -0.0173 | -0.2413 | -0.0865 |
| PKH_060320 | -1.1445 | -1.8514 | -1.4792 | -0.4906 | 0.45292 | 0.57854 | 0.15094 |
| PKH_132830 | 0.4922  | 0.21664 | -0.0722 | -0.3675 | 0.22507 | 0.82465 | 0.93914 |
| PKH_142220 | 0.10855 | 0.15895 | 0.17822 | 0.06209 | 0.08985 | -0.0324 | -0.1016 |
| PKH_094410 | -0.0243 | -0.1014 | 0.23702 | 0.45515 | 0.59541 | 0.43674 | 0.59906 |
| PKH_143320 | 0.41645 | 0.43597 | 0.59538 | 0.41625 | 0.40684 | 0.26002 | 0.14706 |
| PKH_123890 | 1.07219 | 1.03267 | 0.86954 | 0.66564 | 0.28675 | 0.26382 | 0.88419 |
| PKH_051900 | -0.2827 | -0.2523 | -0.3277 | -0.2459 | -0.2507 | -0.3388 | -0.7181 |
| PKH_125620 | -0.2783 | -0.2409 | -0.0724 | -0.1541 | -0.2705 | -0.2605 | 0.00909 |
| PKH_126540 | 0.11512 | 0.07453 | 0.03013 | 0.12274 | 0.40673 | 0.567   | 0.55496 |
| PKH_094110 | -0.0064 | 0.11445 | 0.17504 | 0.03877 | 0.17475 | 0.07096 | 0.02016 |
| PKH_102550 | -0.4563 | -0.6889 | -0.6639 | -0.5802 | -0.5397 | -0.3742 | -0.6187 |
| PKH_050020 | -1.4879 | -1.5112 | -1.4937 | -1.5032 | -1.2226 | -1.1368 | -1.0418 |
| PKH_121010 | -1.2449 | -1.7235 | -1.8204 | -1.629  | -0.4566 | 0.37999 | 0.07579 |
| PKH_092850 | -0.4698 | -0.1883 | -0.1172 | -0.2342 | -0.7894 | -0.8343 | -2.4568 |
| PKH_120340 | -1.0651 | -1.1334 | -0.9504 | -0.3422 | 0.48104 | 0.921   | 0.58604 |
| PKH_133080 | 0.31885 | 0.35156 | 0.19866 | 0.24107 | 0.37819 | 0.19367 | -0.0023 |
| PKH_142880 | -0.1646 | -0.1406 | -0.0176 | -0.0425 | 0.13983 | 0.0014  | 0.02281 |
| PKH_093470 | 0.22855 | 0.14106 | 0.44657 | 0.26293 | 0.43946 | 0.16389 | 0.07959 |
| PKH_143640 | -0.2052 | -0.2488 | -0.4169 | -0.3064 | -0.2447 | -0.364  | -0.8877 |
| PKH_050880 | -0.0953 | -0.161  | -0.1231 | -0.1672 | -0.1429 | -0.0611 | 0.09782 |
| PKH_040780 | -0.0644 | -0.0687 | -0.061  | -0.0468 | -0.0155 | -0.1844 | -0.6517 |
| PKH_111380 | -0.2248 | -0.0029 | -0.078  | 0.21231 | -0.1379 | -0.3443 | -0.6234 |
| PKH_092480 | 0.64068 | 1.22694 | 1.52412 | 2.07441 | 1.43013 | 1.16236 | 1.01675 |
| PKH_100670 | 0.067   | 0.18619 | 0.37422 | 0.31267 | 0.33537 | 0.29174 | 0.06276 |
| PKH_093110 | 0.53549 | -0.0074 | -0.3132 | -0.1172 | 0.72317 | 1.54459 | 1.82012 |
| PKH_126160 | 0.31979 | 0.68663 | 0.88232 | 0.84482 | 0.54722 | 0.42869 | 0.25508 |
| PKH_090240 | -0.5047 | -0.3582 | -0.2175 | -0.1764 | -0.0961 | -0.1943 | -1.386  |
| PKH_134110 | 0.0761  | 0.00258 | -0.1509 | -0.2274 | -0.3088 | -0.2304 | 0.21899 |
| PKH_140420 | 0.2036  | 0.17471 | 0.12679 | 0.13607 | 0.14582 | 0.22269 | 0.30901 |
| PKH_081750 | 0.09315 | -0.084  | -0.2095 | -0.3566 | 0.12862 | -0.2433 | -0.0548 |
| PKH_130290 | 0.39736 | 0.23557 | 0.16119 | 0.22335 | -0.018  | 0.08646 | 0.13728 |
| PKH_122870 | 0.22021 | 0.01197 | 0.34317 | 0.40476 | 0.33501 | 0.13653 | 0.15923 |
| PKH_110540 | 0.87658 | 0.5361  | 0.32756 | 0.12921 | 0.00141 | 0.52183 | 0.98062 |
| PKH_134400 | 0.38707 | 0.44492 | 0.49956 | 0.55487 | 0.52874 | 0.53346 | 0.5661  |
| PKH_070050 | 0.23102 | 0.20433 | 0.31973 | 0.39946 | 0.39449 | 0.41445 | 0.5822  |
| PKH_113870 | -0.1382 | -0.0653 | 0.10601 | 0.35276 | 0.39521 | 0.6659  | 0.71649 |
| PKH_140740 | 0.06988 | 0.41416 | 0.37262 | 0.26311 | 0.43532 | 0.62348 | 0.71694 |
| PKH_132000 | -0.4143 | -0.3436 | -0.3542 | -0.4514 | -0.3109 | -0.3639 | -0.2798 |
| PKH_143060 | 0.58725 | 0.40932 | 0.39534 | 0.36198 | 0.40891 | 0.84489 | 1.83838 |
| PKH_142100 | 0.52158 | 0.71862 | 0.97108 | 1.28778 | 1.13727 | 0.78017 | 0.79815 |
| PKH_124770 | 0.29611 | 0.19229 | 0.23496 | 0.21462 | 0.01619 | -0.0585 | -0.277  |

|            |         |         |         |         |         |         |         |
|------------|---------|---------|---------|---------|---------|---------|---------|
| PKH_144430 | 0.64299 | 0.74817 | 0.76386 | 0.70943 | 0.66885 | 0.64842 | 0.57815 |
| PKH_051720 | -0.5109 | -0.4788 | -0.0524 | 0.01006 | 0.07595 | 0.11042 | 0.46107 |
| PKH_100570 | -0.6041 | -0.2176 | 0.21093 | 0.71754 | 0.88143 | 0.59188 | 0.29312 |
| PKH_141530 | 0.24773 | 0.1342  | 0.16013 | 0.19698 | 0.61698 | 0.59305 | 0.6936  |
| PKH_010160 | -1.3424 | -1.2633 | -1.3754 | -1.3193 | -1.3756 | -1.5437 | -3.2634 |
| PKH_060030 | 1.22389 | 0.83119 | 0.19011 | -0.1209 | 0.02371 | 0.77606 | 1.24806 |
| PKH_146530 | -0.0905 | -0.1551 | 0.08895 | 0.27506 | 0.15868 | 0.32131 | 0.57333 |
| PKH_020220 | 0.80661 | 0.84677 | 0.94215 | 0.72461 | 0.23157 | 0.00187 | -0.1883 |
| PKH_093220 | -0.2011 | -0.0078 | 0.46189 | 0.45547 | 0.60337 | 0.51695 | 0.37424 |
| PKH_113340 | -0.0146 | 0.00787 | -0.1177 | -0.1137 | -0.31   | -0.2777 | 0.00816 |
| PKH_072990 | 0.48331 | 0.81731 | 0.77068 | 0.51564 | 0.49629 | 0.07719 | 0.27382 |
| PKH_040570 | 0.14468 | 0.4633  | 0.26307 | 0.35329 | 0.26364 | 0.12355 | 0.13234 |
| PKH_092080 | -0.861  | -0.9478 | -0.9447 | -0.9217 | -0.7773 | -0.2845 | -0.1472 |
| PKH_131340 | 0.10938 | 0.0038  | 0.28965 | -0.0128 | 0.01657 | -0.0852 | -0.0736 |
| PKH_061170 | -1.1893 | -1.1278 | -1.3331 | -1.3315 | -1.4783 | -1.4931 | -1.6583 |
| PKH_102290 | -0.3238 | -0.1082 | -0.1068 | -0.099  | -0.1751 | -0.1978 | -1.517  |
| PKH_062210 | -0.0678 | -0.0095 | -0.0555 | 0.11467 | 0.01443 | -0.0189 | -0.1963 |
| PKH_093800 | -0.6988 | -0.616  | -0.2749 | 0.23604 | 0.39939 | 0.21331 | -0.119  |
| PKH_141000 | 0.08278 | 0.17984 | 0.19619 | 0.05486 | 0.06528 | 0.04417 | -1.2353 |
| PKH_130140 | 0.34819 | 0.38978 | 0.92804 | 0.8185  | 0.98181 | 0.62212 | 0.13228 |
| PKH_072970 | 0.58258 | 1.01768 | 1.19107 | 1.16043 | 1.11447 | 0.77293 | 0.77561 |
| PKH_130740 | -1.3265 | -0.9622 | -1.0754 | -1.062  | -1.0178 | -1.665  | -2.8099 |
| PKH_146810 | -0.0107 | 0.16264 | -0.0901 | -0.1145 | -0.2691 | -0.1493 | 0.0153  |
| PKH_031480 | -0.8153 | -0.6834 | -0.8623 | -0.6513 | -0.7549 | -0.9384 | -2.2872 |
| PKH_146020 | 1.02197 | 1.01109 | 1.01304 | 1.23724 | 1.12223 | 0.87434 | 0.91419 |
| PKH_070740 | -0.1251 | 0.1587  | 0.2005  | 0.03154 | 0.05309 | 0.09739 | -0.5261 |
| PKH_030570 | -2.0176 | -1.7488 | -1.7764 | -1.8185 | -1.5897 | -1.6239 | -2.2335 |
| PKH_122790 | -0.0007 | -0.0595 | -0.0232 | -0.1974 | -0.0235 | -0.2327 | 0.23069 |
| PKH_060970 | -1.3371 | -1.2978 | -0.6448 | -0.0362 | 0.32317 | 0.45655 | -0.2913 |
| PKH_060220 | -0.0176 | 0.09666 | 0.47764 | 0.51919 | 0.23386 | 0.03303 | 0.09972 |
| PKH_093350 | 0.05755 | -0.0129 | -0.0132 | 0.20507 | -0.0203 | 0.05015 | -1.164  |
| PKH_093910 | 0.65031 | 1.04687 | 0.92876 | 0.94119 | 0.48608 | 0.15712 | 0.18865 |
| PKH_061330 | -0.2265 | -0.2674 | -0.3391 | -0.3632 | -0.4736 | -0.4831 | -0.3444 |
| PKH_102230 | -0.2089 | -0.0925 | -0.2613 | -0.1869 | -0.2486 | -0.3323 | -1.3296 |
| PKH_051400 | 0.40678 | 0.61945 | 0.76338 | 0.94267 | 0.44732 | 0.21463 | 0.14742 |
| PKH_131570 | 1.32028 | 1.50472 | 1.74461 | 1.78416 | 1.25768 | 0.85183 | 0.69763 |
| PKH_124410 | 0.65104 | 0.68867 | 0.68145 | 0.62459 | 0.29681 | 0.16486 | 0.28233 |
| PKH_101690 | 0.13575 | 0.29853 | 0.39807 | 0.18264 | -0.2614 | -0.4194 | -0.4508 |
| PKH_010960 | 0.41208 | 0.72421 | 0.72257 | 0.3727  | 0.20849 | -0.031  | -0.3681 |
| PKH_121090 | 0.06939 | -0.0637 | 0.12096 | 0.05535 | 0.03127 | 0.24516 | 0.13903 |
| PKH_061690 | 0.4561  | 0.45764 | 0.30217 | 0.52325 | 0.19538 | 0.21492 | -1.2768 |
| PKH_071820 | 0.81399 | 1.03332 | 1.05508 | 0.89509 | 0.38478 | 0.12843 | 0.19752 |
| PKH_062280 | -0.5351 | -0.6555 | -1.5129 | -0.6843 | -0.588  | -0.8328 | -1.6807 |
| PKH_131490 | 0.59256 | 0.38393 | 0.51157 | 0.03405 | 0.01805 | 0.25704 | 0.79828 |
| PKH_122480 | -1.0053 | -0.9181 | -0.5824 | -0.335  | -0.0947 | 0.00504 | -0.2742 |
| PKH_052750 | -0.5512 | -0.9613 | -1.1511 | -1.4278 | -1.214  | -0.7083 | 0.12507 |
| PKH_124160 | 0.69703 | 0.62078 | 0.98757 | 0.62225 | 0.46207 | 0.51136 | 0.61276 |
| PKH_030520 | -0.4287 | -0.4547 | -0.5688 | -0.7171 | -0.7646 | -1.0063 | -0.8887 |
| PKH_111200 | 0.77601 | 0.71568 | 0.85838 | 0.51467 | 0.51496 | 0.42382 | 0.63231 |
| PKH_052340 | 0.32988 | 0.66889 | 0.38691 | 0.57688 | 0.19911 | -0.0501 | -0.2992 |
| PKH_141820 | -0.3187 | -0.0215 | -0.3954 | -0.6656 | -0.8116 | -0.7684 | -0.6737 |
| PKH_090760 | 0.28462 | 0.23136 | 0.03922 | 0.02943 | -0.2541 | -0.3788 | -0.137  |
| PKH_080440 | 0.16408 | 0.23172 | 0.05257 | -0.2624 | 0.00862 | -0.1749 | -0.0307 |
| PKH_091960 | 0.24059 | 0.31535 | 0.28885 | 0.55255 | 0.27667 | 0.26535 | 0.16784 |
| PKH_050110 | 0.66259 | 0.90105 | 0.56861 | 0.3072  | 0.39542 | 0.48336 | 1.21898 |
| PKH_060160 | 0.26701 | -0.2583 | -0.6322 | -0.6855 | 0.12429 | 1.34296 | 1.74237 |
| PKH_114860 | 1.19264 | 0.8434  | 0.01119 | -0.6663 | -0.8418 | 0.07314 | 1.34353 |
| PKH_141650 | 0.42773 | 0.62761 | 0.65341 | 0.75216 | 0.37979 | -0.0312 | 0.16828 |
| PKH_141430 | 0.52177 | 0.45674 | 0.63459 | 0.49449 | 0.60228 | 0.68604 | 0.10645 |
| PKH_071870 | 0.38964 | 0.33138 | 0.22156 | 0.13408 | 0.1663  | -0.0592 | -0.1515 |
| PKH_123780 | -0.2395 | -0.1468 | -0.3306 | -0.3397 | -0.4735 | -0.5072 | -0.4288 |
| PKH_091990 | -0.2875 | -0.3627 | -0.3905 | -0.5069 | -0.42   | -0.4329 | -0.2363 |
| PKH_146760 | 0.37843 | 0.18541 | 0.06947 | 0.19642 | 0.1522  | 0.41585 | 0.44251 |

|            |         |         |         |         |         |         |         |
|------------|---------|---------|---------|---------|---------|---------|---------|
| PKH_131370 | 0.3378  | -0.3392 | -0.7187 | 0.11219 | 1.406   | 2.0332  | 1.93826 |
| PKH_041510 | -0.4161 | -0.6705 | -0.7827 | -1.2452 | -1.2357 | -1.346  | -1.0263 |
| PKH_102740 | 0.36964 | 0.44864 | 0.36513 | 0.36857 | 0.32316 | 0.23049 | 0.35827 |
| PKH_133060 | 0.20452 | 0.15318 | 0.16444 | -0.0624 | 0.46688 | 0.46808 | 0.24867 |
| PKH_102780 | -0.261  | -0.3039 | -0.3172 | -0.3939 | -0.1334 | 0.13966 | 0.15555 |
| PKH_094350 | 0.46757 | 0.49839 | 0.17111 | -0.0638 | 0.11147 | -0.0882 | 0.18812 |
| PKH_020530 | -0.7625 | -0.4962 | -0.5142 | -0.4044 | -0.641  | -0.684  | -0.8335 |
| PKH_030880 | 0.46269 | 0.63865 | 0.66309 | 0.42947 | 0.11119 | -0.1609 | -0.3234 |
| PKH_020880 | -0.6004 | -0.3105 | -0.1867 | -0.3564 | -0.053  | -0.3321 | -0.9154 |
| PKH_083530 | 0.20566 | 0.24296 | 0.04625 | 0.13419 | -0.217  | -0.4846 | -0.1192 |
| PKH_051100 | -0.0969 | -0.1248 | -0.424  | -0.397  | -0.3049 | -0.2491 | -0.3108 |
| PKH_083170 | -0.178  | -0.5524 | -0.8452 | -0.6842 | 0.54848 | 1.25721 | 1.4231  |
| PKH_142860 | 0.7921  | 0.61825 | 0.59815 | 0.59385 | 0.64289 | 1.14852 | 1.64453 |
| PKH_031170 | -1.0899 | -1.1869 | -0.9048 | -1.1384 | -0.9666 | -0.8875 | -1.5011 |
| PKH_121180 | -0.2382 | -0.2909 | -0.4205 | -0.6297 | -0.7924 | -0.593  | 0.05871 |
| PKH_113580 | -0.2847 | -0.1482 | -0.146  | -0.0164 | -0.0288 | -0.0571 | -0.0028 |
| PKH_070560 | -0.1126 | 0.07745 | 0.15385 | 0.52103 | 0.54813 | 0.53356 | 0.51639 |
| PKH_011480 | -0.7689 | -0.9764 | -1.2359 | -2.0169 | -1.0445 | -0.4828 | -0.2385 |
| PKH_121870 | -0.0844 | -0.1848 | -0.1775 | -0.063  | -0.6776 | -0.8871 | -0.8476 |
| PKH_094190 | -0.0085 | -0.0826 | -0.0862 | 0.01519 | -0.1627 | -0.1489 | -0.4392 |
| PKH_010240 | -1.1406 | -1.4127 | -1.5557 | -1.7977 | -1.6359 | -1.6023 | -1.8948 |
| PKH_125520 | -0.0963 | -0.1132 | -0.2202 | -0.6266 | -0.7229 | -0.8143 | -0.9872 |
| PKH_030790 | 0.11909 | 0.31625 | 0.40624 | 0.81782 | 0.5206  | 0.53971 | 0.54205 |
| PKH_124170 | -0.0297 | -0.692  | -0.7721 | 0.18813 | 0.65466 | 0.74239 | 0.95274 |
| PKH_146010 | 0.49674 | 0.54213 | 0.65578 | 0.49093 | 0.50667 | 0.48455 | 0.58472 |
| PKH_071440 | -0.4649 | -0.3257 | -0.5794 | -0.7613 | -0.5777 | -0.7227 | -0.7671 |
| PKH_052380 | -0.2959 | -0.1657 | -0.3713 | -0.0521 | -0.1282 | -0.0505 | -0.1835 |
| PKH_140030 | 1.23825 | 1.23939 | 0.92667 | 0.57434 | 0.18251 | -0.1256 | 0.67327 |
| PKH_133490 | 0.81818 | 0.69609 | 0.62842 | 0.75313 | 0.53256 | 0.58226 | 0.57883 |
| PKH_102570 | -0.8471 | -0.6866 | -0.3593 | -0.0912 | -0.0693 | 0.05885 | -1.4684 |
| PKH_141080 | -0.0892 | -0.1562 | -0.0531 | -0.0666 | -0.0434 | -0.0802 | -1.3145 |
| PKH_143480 | 0.28232 | -0.0048 | -0.0056 | 0.2363  | 0.33973 | 0.58021 | 0.5922  |
| PKH_061470 | -0.5594 | -0.5078 | -0.3512 | -0.2545 | -0.4246 | -0.5686 | -2.0597 |
| PKH_030110 | -0.1114 | 0.04394 | 0.01534 | 0.01473 | 0.02026 | 0.0513  | 0.2901  |
| PKH_143520 | 0.24066 | 0.2286  | 0.36266 | 0.11278 | 0.08647 | 0.19691 | -0.5027 |
| PKH_141500 | 0.80366 | 0.91744 | 1.03712 | 1.16385 | 0.74964 | 0.42395 | 0.61348 |
| PKH_146980 | -0.8071 | -1.1859 | -1.7088 | -0.8882 | -0.5162 | 0.37787 | 0.67579 |
| PKH_021370 | -1.1648 | -1.2268 | -1.387  | -1.5689 | -1.7394 | -1.4351 | -1.571  |
| PKH_050530 | -1.7527 | -1.6333 | -1.7693 | -1.3845 | -1.6834 | -1.8015 | -3.4244 |
| PKH_011130 | -0.1678 | -0.0709 | -0.1488 | -0.2223 | -0.3816 | -0.6288 | -0.9042 |
| PKH_062040 | -0.7845 | -1.3924 | -1.2123 | -0.2771 | 0.89966 | 0.98179 | 0.76871 |
| PKH_114280 | -0.144  | -0.0195 | 0.301   | 0.53775 | 0.52107 | 0.26834 | 0.23362 |
| PKH_070450 | -0.4184 | -0.2201 | -0.1584 | -0.3913 | -0.3092 | -0.2782 | -0.3731 |
| PKH_101600 | -0.4727 | -0.2971 | -0.0159 | 0.07888 | 0.63587 | 0.50197 | -0.0267 |
| PKH_134020 | -0.3901 | -0.0483 | 0.09044 | -0.0803 | 0.06543 | -0.0581 | 0.21661 |
| PKH_122190 | 1.04942 | 0.93008 | 0.42427 | -0.11   | 0.01885 | 0.08615 | 0.22021 |
| PKH_140400 | 0.11838 | 0.25561 | 0.23216 | 0.27036 | 0.08596 | -0.0537 | -0.1204 |
| PKH_145980 | 0.36879 | 0.15374 | 0.04753 | -0.0046 | -0.1745 | -0.1365 | 0.02956 |
| PKH_090860 | -0.8015 | -1.0325 | -0.916  | -0.8019 | -0.7229 | -0.5899 | -0.343  |
| PKH_020370 | 0.39219 | 0.05865 | -0.4302 | -0.204  | -0.3562 | -0.2684 | -0.6981 |
| PKH_132260 | -0.5747 | -0.1239 | -0.2091 | -0.1979 | -0.3733 | -0.6462 | -1.4605 |
| PKH_052250 | 0.6358  | 0.80924 | 0.49405 | 0.53771 | 0.3079  | 0.35216 | 0.32004 |
| PKH_082120 | -0.8303 | -0.6755 | -0.7617 | -0.7536 | -0.7952 | -0.6804 | -1.1107 |
| PKH_131440 | -0.075  | 0.06636 | 0.1408  | 0.27985 | 0.18343 | -0.0413 | -1.1807 |
| PKH_120540 | 0.39318 | 0.54088 | 0.72136 | 0.88077 | 0.59531 | 0.5424  | 0.64678 |
| PKH_112930 | 0.08087 | 0.24478 | 0.02962 | 0.17561 | -0.0725 | -0.0313 | -1.1061 |
| PKH_125670 | -0.4071 | -0.6342 | -0.229  | 0.33801 | 0.86261 | 0.99797 | 0.7882  |
| PKH_123140 | 0.46066 | 0.40745 | 0.25728 | 0.19569 | -0.1445 | -0.3704 | -0.1363 |
| PKH_011210 | -2.6213 | -2.5902 | -2.5162 | -2.367  | -2.2795 | -2.4224 | -3.1095 |
| PKH_091580 | -0.5772 | -0.3031 | -0.1925 | -0.1318 | -0.0246 | -0.1247 | -0.1652 |
| PKH_112200 | 0.1067  | 0.27476 | 0.19862 | 0.15167 | 0.08622 | 0.064   | 0.00999 |
| PKH_110420 | 0.26313 | 0.50542 | 0.39724 | 0.10649 | 0.03623 | 0.03473 | 0.08367 |
| PKH_081440 | 0.30896 | 0.20579 | 0.30776 | 0.23889 | 0.20735 | 0.13578 | 0.44326 |

|            |         |         |         |         |         |         |         |
|------------|---------|---------|---------|---------|---------|---------|---------|
| PKH_123900 | 0.45667 | 0.17846 | 0.09594 | -0.2913 | -0.2374 | -0.1999 | 0.21188 |
| PKH_061830 | 0.2374  | -0.0256 | -0.1302 | -0.1751 | -0.2853 | -0.1839 | -1.3386 |
| PKH_094530 | -0.2682 | -0.3497 | -0.4434 | -0.3898 | -0.2892 | -0.1276 | -0.0778 |
| PKH_123600 | 0.16798 | -0.1785 | 0.03648 | 0.00788 | 0.54559 | 0.78984 | 1.02741 |
| PKH_111500 | 0.12094 | 0.11698 | 0.11745 | 0.00703 | 0.12955 | 0.12271 | 0.15067 |
| PKH_101190 | -0.3962 | -0.1817 | -0.219  | -0.29   | -0.3075 | -0.2888 | -0.4124 |
| PKH_101960 | -0.0135 | -0.1015 | -0.1932 | -0.1494 | -0.307  | -0.3083 | -1.7632 |
| PKH_073180 | -0.6895 | -0.5511 | -0.5819 | -0.6216 | -0.7032 | -0.7428 | -0.7712 |
| PKH_041730 | 0.47666 | 0.36659 | 0.05995 | -0.0972 | -0.2334 | 0.59331 | 1.06487 |
| PKH_080980 | 0.77935 | 0.52827 | 0.20413 | 0.22486 | 0.38701 | 0.89736 | 1.59448 |
| PKH_091940 | 0.21129 | 0.16996 | 0.13215 | -0.0362 | -0.108  | -0.2269 | -0.0688 |
| PKH_125810 | -0.2055 | -0.1763 | -0.3998 | 0.02713 | -0.3818 | -0.0096 | -1.2085 |
| PKH_123210 | -0.7223 | -0.4421 | -0.0322 | -0.1507 | 0.22809 | 0.02512 | -0.4587 |
| PKH_083470 | 0.24468 | 0.09167 | 0.29567 | 0.20254 | 0.56713 | 0.55572 | 0.79111 |
| PKH_131110 | -0.015  | -0.1004 | -0.1835 | -0.1502 | -0.1316 | -0.1701 | 0.03697 |
| PKH_131910 | 0.07859 | -0.2663 | -0.4352 | -0.813  | -1.0148 | -1.0191 | -0.1219 |
| PKH_082460 | -0.3202 | -0.3715 | -0.7656 | -1.0946 | -0.8433 | -0.8972 | -0.9722 |
| PKH_131590 | 0.31498 | 0.26843 | 0.32102 | 0.14712 | 0.38819 | 0.53126 | 0.67873 |
| PKH_100070 | 0.54613 | 0.82776 | 1.00582 | 1.24674 | 1.00091 | 0.83301 | 0.67202 |
| PKH_091090 | -0.0152 | 0.17897 | 0.02443 | -0.1009 | -0.0783 | -0.1429 | -0.243  |
| PKH_070810 | 0.1757  | 0.0571  | 0.37468 | -0.0141 | 0.31889 | 0.01635 | 0.23642 |
| PKH_146870 | 0.132   | -0.0113 | 0.2248  | 0.0923  | 0.26569 | 0.20411 | -1.0493 |
| PKH_090580 | -1.0404 | -0.6952 | -0.5337 | -0.4254 | -0.667  | -0.7185 | -1.102  |
| PKH_123940 | -0.1647 | -0.1622 | -0.1333 | -0.1009 | -0.063  | -0.1103 | -0.1623 |
| PKH_125490 | 0.26307 | 0.15007 | 0.24917 | 0.19544 | 0.19622 | 0.32696 | 0.1328  |
| PKH_052110 | -0.3475 | -0.2909 | -0.5699 | -0.247  | -0.5002 | -0.4503 | -1.6914 |
| PKH_125210 | 0.14005 | 0.05734 | -0.6248 | -0.7863 | -1.0769 | -0.74   | 0.09314 |
| PKH_131820 | -0.1543 | -0.2482 | -0.159  | -0.3232 | -0.4061 | -0.2366 | 0.13629 |
| PKH_060040 | -0.0775 | 0.04508 | 0.04306 | -0.0504 | -0.1049 | -0.0638 | -1.2916 |
| PKH_121550 | 0.38004 | 0.47678 | 0.21398 | 0.29803 | 0.06366 | -0.1532 | 0.1914  |
| PKH_111480 | -0.1417 | -0.2994 | -0.2348 | -0.272  | -0.4327 | -0.2141 | -0.2903 |
| PKH_145030 | 0.01848 | 0.16167 | 0.01469 | 0.03147 | 0.10848 | 0.14808 | 0.01948 |
| PKH_081680 | 0.65057 | 0.77066 | 0.80794 | 0.83265 | 0.72818 | 0.87284 | 1.25478 |
| PKH_052580 | -1.0137 | -0.3377 | 0.01547 | 0.42442 | 0.11362 | -0.0327 | -0.2736 |
| PKH_040400 | -0.4295 | -0.5855 | -0.461  | -0.6482 | -0.3999 | -0.3477 | -0.3404 |
| PKH_131870 | -1.1426 | -1.142  | -0.9572 | -0.9967 | -0.8853 | -0.714  | -0.6503 |
| PKH_010010 | 0.47502 | 0.4901  | 0.50398 | 0.35716 | 0.15372 | 0.43581 | 0.37634 |
| PKH_091120 | 0       | -0.1818 | -0.133  | -0.1945 | -0.1081 | -0.0257 | -0.1453 |
| PKH_145190 | 0.01828 | -0.2233 | -0.1373 | -0.2182 | -0.3609 | -0.3613 | -0.4028 |
| PKH_082260 | -0.4579 | -0.4338 | -0.4634 | -0.3872 | -0.4724 | -0.5614 | -0.82   |
| PKH_100550 | -0.0802 | 0.09774 | -0.1528 | 0.16429 | -0.0593 | -0.0674 | -1.3475 |
| PKH_121080 | -0.2786 | -0.2084 | -0.3945 | -0.4393 | -0.3376 | 0.08158 | 0.08087 |
| PKH_146640 | 0.65316 | 0.58149 | 0.39136 | 0.00214 | 0.07741 | 0.34663 | 0.63428 |
| PKH_093990 | 0.96323 | 1.03776 | 0.89635 | 0.72211 | 0.31036 | 0.15022 | 0.30335 |
| PKH_143720 | 0.32324 | 0.56818 | 0.822   | 1.02407 | 0.76117 | 0.63975 | 0.91353 |
| PKH_122270 | 0.34233 | 0.15804 | 0.34755 | 0.47959 | 0.12766 | 0.47224 | 0.04912 |
| PKH_090590 | 0.37184 | 0.60928 | 0.333   | 0.50562 | 0.60118 | 0.47582 | 0.37668 |
| PKH_050270 | 0.01709 | 0.08668 | 0.0223  | -0.1341 | -0.1273 | -0.2702 | -0.5418 |
| PKH_051050 | 0.27169 | 0.92008 | 0.18189 | 0.22293 | -0.0967 | -0.3003 | -0.556  |
| PKH_092570 | 0.20242 | 0.0218  | 0.13848 | -0.0264 | 0.24606 | 0.41079 | 0.19817 |
| PKH_080880 | 0.21573 | 0.1578  | 0.15759 | 0.15872 | 0.24262 | 0.05532 | -0.2521 |
| PKH_072320 | -0.5354 | -1.0086 | -1.2056 | -1.3192 | -1.045  | -0.565  | -0.6018 |
| PKH_145630 | -0.2027 | -0.3447 | 0.22922 | 0.14485 | 0.59386 | 0.59151 | 1.15643 |
| PKH_113720 | -0.4954 | -0.4877 | -0.036  | 0.21545 | 0.4633  | 0.52619 | 0.36322 |
| PKH_073320 | 0.35339 | 0.09193 | 0.09152 | 0.00059 | 0.16705 | 0.14436 | 0.0371  |
| PKH_111290 | 0.42137 | 0.43164 | 0.44511 | -0.0099 | 0.34206 | 0.41559 | 0.69294 |
| PKH_113390 | -0.1101 | 0.28242 | 0.47712 | 0.49262 | 0.44167 | 0.34486 | 0.06715 |
| PKH_142410 | 0.10579 | -0.1117 | -0.0778 | -0.182  | -0.1052 | 0.06094 | 0.30594 |
| PKH_094400 | -0.3247 | -0.1506 | 0.01602 | 0.14339 | 0.27314 | 0.61217 | 0.324   |
| PKH_051850 | -0.4443 | -0.4539 | -0.4209 | -0.1837 | -0.5535 | -0.4025 | -1.8559 |
| PKH_145230 | 0.4657  | 0.03225 | -0.1725 | -0.2768 | -0.3552 | -0.0294 | 0.58242 |
| PKH_140070 | 0.42523 | -0.0268 | -0.3943 | -0.2616 | 0.47248 | 0.9526  | 1.26444 |
| PKH_070260 | -0.9546 | -1.2687 | -0.7603 | -0.1066 | 0.26572 | 0.64378 | 0.51422 |

|            |         |         |         |         |         |         |         |
|------------|---------|---------|---------|---------|---------|---------|---------|
| PKH_121730 | 0.66281 | 0.63377 | 0.39869 | 0.3737  | 0.05117 | -0.1983 | -0.0558 |
| PKH_132290 | 0.24099 | 0.3851  | 0.33067 | 0.69583 | 0.60421 | 0.56512 | 0.55725 |
| PKH_145080 | 0.087   | -0.1197 | 0.22649 | 0.04019 | 0.18951 | 0.10777 | 0.0814  |
| PKH_102960 | 0.10081 | -0.0153 | -0.0321 | -0.1922 | 0.04538 | 0.14801 | 0.22326 |
| PKH_145170 | -0.3668 | -0.3097 | -0.2806 | -0.2575 | -0.3552 | -0.3295 | -0.4179 |
| PKH_141880 | 0.24521 | 0.21537 | 0.52087 | 0.80834 | 0.5576  | 0.76281 | 0.58191 |
| PKH_126820 | 0.24634 | 0.66792 | 0.37254 | 0.53943 | 0.44525 | 0.49667 | 0.13023 |
| PKH_131050 | 0.36121 | 0.60306 | 0.86756 | 0.79317 | 0.31343 | 0.13973 | 0.16635 |
| PKH_125990 | -0.4383 | -0.6315 | -0.563  | -0.7913 | -0.6038 | -0.4576 | 0.01036 |
| PKH_081270 | 0.13198 | 0.01401 | 0.02679 | 0.05294 | 0.88216 | 1.23318 | 0.79073 |
| PKH_131690 | 0.39539 | 0.068   | 0.34043 | 0.31608 | 0.15575 | 0.33918 | 0.52084 |
| PKH_140340 | 0.20586 | 0.07069 | 0.11091 | 0.06289 | -0.1132 | 0.00163 | 0.23563 |
| PKH_112140 | -0.3525 | -0.5831 | -0.6863 | -0.8706 | -0.7256 | -0.8413 | -0.7023 |
| PKH_061510 | 0.36404 | 0.51163 | 0.51958 | 0.48003 | 0.51225 | 0.33277 | 0.1878  |
| PKH_133920 | 0.70842 | 0.39359 | 0.24636 | 0.17805 | 0.03928 | 0.40962 | 0.83676 |
| PKH_126930 | -0.1436 | -0.1704 | -0.1646 | -0.1837 | -0.2271 | -0.2771 | -0.1418 |
| PKH_125640 | 0.62221 | 0.60437 | 0.58236 | 0.40063 | 0.72772 | 0.87388 | 1.24058 |
| PKH_114350 | -0.4726 | -0.5073 | -0.2882 | -0.2635 | -0.6269 | -0.5082 | -0.9297 |
| PKH_072220 | 0.3495  | 0.39584 | 0.37357 | 0.29169 | 0.31597 | 0.18217 | 0.24392 |
| PKH_083570 | 0.52308 | 0.63336 | 0.49275 | 0.37497 | 0.07464 | 0.05058 | 0.24801 |
| PKH_050070 | 0.48674 | 0.46552 | 0.61605 | 0.40646 | 0.42932 | 0.78406 | 0.8837  |
| PKH_030860 | 0.64521 | 0.56675 | 0.50996 | 0.08938 | 0.59379 | 0.58788 | 0.82947 |
| PKH_112380 | 0.54368 | 0.4959  | 0.44691 | 0.41942 | 0.42579 | 0.48854 | 0.4056  |
| PKH_101490 | -0.3463 | 0.25845 | 0.53188 | 0.70032 | 0.36634 | 0.0851  | -0.4343 |
| PKH_146910 | 0.61577 | 0.70582 | 0.45564 | 0.40652 | 0.21313 | 0.22523 | 0.67573 |
| PKH_102280 | -0.8448 | -0.5259 | -0.3438 | -0.3785 | -0.3917 | -0.443  | -1.1692 |
| PKH_073010 | 0.17484 | 0.3722  | 0.4585  | 0.86033 | 0.60631 | 0.42721 | 0.27162 |
| PKH_140890 | 0.54273 | 1.11781 | 0.981   | 0.99899 | 0.52289 | 0.41226 | 0.58606 |
| PKH_145830 | 0.40041 | 0.31919 | 0.43073 | 0.33824 | 0.22435 | 0.10374 | -0.2877 |
| PKH_080620 | 0.10418 | 0.24312 | 0.19533 | 0.22901 | 0.12074 | 0.32195 | 0.17073 |
| PKH_061020 | -1.2845 | -1.2891 | -0.9079 | -0.4397 | -0.0903 | 0.00457 | -0.1915 |
| PKH_143890 | -0.1249 | -0.2259 | -0.1714 | -0.2861 | -0.0402 | -0.0211 | 0.0033  |
| PKH_123990 | -0.1217 | -0.3062 | -0.4169 | -0.2513 | 0.0053  | -0.2515 | -0.0706 |
| PKH_052210 | -1.0817 | -0.7459 | -1.09   | -0.8103 | -0.8729 | -0.9728 | -2.6412 |
| PKH_133100 | 0.20022 | 0.25623 | 0.46419 | 0.7721  | 0.50929 | 0.48283 | 0.48055 |
| PKH_121620 | 0.0004  | 0.04146 | 0.13197 | 0.15747 | 0.09384 | 0.13033 | 0.01391 |
| PKH_134150 | -0.0195 | -0.0353 | 0.04309 | 0.03967 | -0.0814 | -0.0015 | -0.0571 |
| PKH_141580 | 0.08704 | 0.29134 | 0.42013 | 0.91991 | 0.88728 | 1.13184 | 1.17736 |
| PKH_126480 | 0.10815 | 0.06834 | 0.21233 | 0.62749 | 0.59219 | 0.28999 | 0.42234 |
| PKH_124910 | 0.49128 | 0.67967 | 0.6988  | 1.10082 | 0.72314 | 0.58588 | 0.40542 |
| PKH_092710 | -0.0557 | -0.2371 | -0.2914 | -0.0136 | 0.6578  | 0.69358 | 0.83404 |
| PKH_080170 | 0.07607 | -0.4483 | -0.7816 | -0.1666 | 0.51698 | 1.65793 | 1.56748 |
| PKH_101840 | -0.3365 | -0.1672 | -0.3254 | -0.1944 | -0.0564 | -0.1681 | -0.0358 |
| PKH_143250 | 0.72196 | 1.15985 | 1.23886 | 0.59495 | 0.29254 | 0.53366 | 0.32576 |
| PKH_144590 | 0.15468 | -0.3162 | -0.7493 | -0.9684 | -1.0851 | -0.7355 | -0.3804 |
| PKH_146770 | 0.16072 | 0.20252 | -0.0545 | -0.2891 | -0.1282 | -0.1439 | 0.0849  |
| PKH_124050 | 0.10909 | 0.38863 | 0.50908 | 0.71602 | 0.46738 | 0.25113 | 0.05239 |
| PKH_126570 | -0.0463 | -0.0314 | 0.08687 | -0.0443 | 0.03025 | -0.0861 | -0.4475 |
| PKH_133610 | 0.65199 | 0.45675 | 0.41837 | 0.06774 | 0.01253 | 0.24927 | 0.70957 |
| PKH_125460 | -0.5228 | -0.5569 | -0.5317 | -0.425  | -0.3625 | -0.2845 | -0.3794 |
| PKH_125380 | 0.21853 | 0.5088  | 0.59061 | 0.60743 | 0.56248 | 0.28734 | -0.0149 |
| PKH_120890 | -0.5744 | -0.1876 | 0.11783 | 0.02334 | -0.2511 | -0.1885 | -0.2681 |
| PKH_133900 | -0.0526 | -0.3194 | 0.10899 | -0.0469 | 0.05136 | -0.0074 | -1.3736 |
| PKH_041430 | 0.39011 | 0.50139 | 0.76443 | 0.39889 | 0.21372 | 0.16248 | 0.28347 |
| PKH_021270 | -0.121  | 0.12262 | 0.04005 | 0.14446 | -0.0788 | -0.1428 | -0.1761 |
| PKH_132040 | 0.07905 | -0.0242 | 0.17168 | 0.20466 | 0.46392 | 0.52546 | 0.33897 |
| PKH_122080 | 0.30794 | 0.27827 | 0.43061 | 0.39094 | 0.24154 | 0.24079 | 0.47773 |
| PKH_041400 | -0.6924 | -0.4081 | -0.4961 | -0.2891 | -0.2783 | -0.6889 | -1.0734 |
| PKH_041700 | -1.0121 | -0.7756 | -0.5768 | -0.149  | -0.2051 | -0.3582 | -0.9739 |
| PKH_073150 | 0.04977 | 0.30045 | 0.16731 | 0.22175 | 0.13485 | -0.0333 | -0.2222 |
| PKH_060630 | -0.5009 | -0.337  | -0.2495 | -0.1283 | -0.3724 | -0.7087 | -0.5755 |
| PKH_092310 | -1.1827 | -1.2746 | -1.3538 | -1.5328 | -1.5478 | -1.5101 | -1.4919 |
| PKH_100600 | 0.35888 | 0.37152 | 0.37748 | 0.62977 | 0.48045 | 0.07583 | -0.127  |

|            |         |         |         |         |         |         |         |
|------------|---------|---------|---------|---------|---------|---------|---------|
| PKH_041750 | -0.5465 | -0.5478 | -0.5554 | -0.5919 | -0.5884 | -0.3477 | -0.4635 |
| PKH_071910 | 0.88612 | 0.88894 | 0.75913 | 0.52701 | 0.57218 | 0.38551 | 0.60806 |
| PKH_072440 | -0.8956 | -0.877  | -1.035  | -0.8141 | -0.7587 | -0.8599 | -1.1055 |
| PKH_081090 | 0.54991 | 0.69573 | 0.81591 | 0.92142 | 0.88709 | 0.88746 | 0.72184 |
| PKH_110250 | -0.5388 | -0.4592 | -0.3381 | 0.53924 | 0.13443 | 0.16319 | -0.098  |
| PKH_146330 | 0.73872 | 0.79606 | 0.60756 | 0.5486  | 0.60942 | 0.57484 | 0.93777 |
| PKH_041060 | 0.17413 | 0.24092 | 0.06108 | 0.02236 | -0.0634 | -0.0369 | -0.1159 |
| PKH_121810 | 0.31735 | 0.11191 | 0.16538 | 0.04797 | -0.0229 | -0.0373 | -0.1873 |
| PKH_082620 | 0.56113 | 0.94009 | 1.21001 | 1.38712 | 1.14375 | 0.81918 | 0.34427 |
| PKH_124850 | 0.30292 | 0.37334 | 0.46779 | 0.13444 | 0.12643 | 0.10422 | 0.00922 |
| PKH_142950 | -0.1236 | 0.09043 | 0.29989 | 0.28365 | 0.42314 | 0.40015 | 0.33384 |
| PKH_141590 | 0.77678 | 0.65702 | 0.7985  | 0.53081 | 0.83107 | 0.40682 | 0.14813 |
| PKH_051290 | -0.0337 | -0.3422 | -0.9005 | -1.2262 | -1.2318 | -1.2513 | -1.0107 |
| PKH_092650 | 0.04257 | 0.10339 | 0.17275 | 0.27458 | 0.29985 | 0.18026 | -0.0166 |
| PKH_125070 | 0.59773 | 0.40911 | 0.07766 | -0.0259 | -0.4059 | -0.1474 | 0.56126 |
| PKH_143810 | 0.45596 | 0.50799 | 0.44868 | 0.35789 | 0.21045 | -0.0619 | 0.18082 |
| PKH_125550 | 0.14476 | 0.1867  | 0.15548 | 0.0077  | -0.3228 | -0.4703 | 0.06847 |
| PKH_145750 | -0.2428 | -0.0576 | 0.03871 | 0.05999 | 0.05413 | -0.1514 | -0.1143 |
| PKH_100500 | -1.1755 | -0.8615 | -0.2175 | 0.15419 | 0.09395 | 0.13445 | -0.274  |
| PKH_140630 | -0.0166 | -0.2633 | -0.1359 | -0.3555 | -0.058  | -0.2104 | 0.04713 |
| PKH_140430 | 0.53054 | 1.13898 | 1.01764 | 0.65639 | 0.59116 | 0.43713 | 0.62913 |
| PKH_091000 | -0.0442 | -0.127  | 0.02074 | -0.1725 | 0.06043 | -0.1287 | 0.00584 |
| PKH_031610 | -0.5695 | -0.4108 | -0.5116 | -0.7375 | -0.8374 | -0.9031 | -1.0668 |
| PKH_101720 | 0.39565 | 0.27369 | 0.22643 | 0.21871 | 0.3693  | 0.41365 | 0.70856 |
| PKH_146940 | 0.57524 | 0.69754 | 0.71702 | 0.88388 | 1.01364 | 0.81293 | 0.73196 |
| PKH_090660 | 0.62954 | 0.42748 | 0.71564 | 0.26895 | 0.54559 | 0.26276 | 0.63241 |
| PKH_030280 | -0.496  | 0.08802 | -0.467  | -0.3497 | -0.4785 | -0.6824 | -2.2275 |
| PKH_083520 | -0.6253 | -0.7355 | -0.3774 | -0.695  | -0.6768 | -0.7379 | -0.6432 |
| PKH_081050 | -0.7957 | -0.58   | -0.3972 | 0.09599 | -0.1972 | -0.3597 | -1.0689 |
| PKH_122930 | -0.1648 | -0.1704 | -0.0628 | -0.1592 | -0.4054 | -0.3031 | -1.5737 |
| PKH_041420 | -1.6072 | -1.5744 | -1.3205 | -1.4426 | -1.23   | -1.0472 | -1.1467 |
| PKH_133360 | 0.06332 | 0.53427 | 0.89021 | 1.20402 | 0.93467 | 0.93134 | 0.86904 |
| PKH_141330 | 0.15579 | 0.32911 | 0.52769 | 0.58745 | 0.76159 | 0.59194 | 0.37183 |
| PKH_100750 | 0.04    | 0.02053 | 0.11256 | -0.114  | -0.2803 | -0.1424 | -0.0553 |
| PKH_090320 | 0.56238 | 0.6189  | 0.49713 | 0.33629 | -0.1062 | -0.2907 | -0.4277 |
| PKH_126010 | 0.11252 | 0.09916 | 0.02305 | -0.1214 | 0.05933 | 0.31573 | 0.51531 |
| PKH_093250 | -0.3414 | -0.2161 | -0.5492 | -0.3369 | -0.2368 | -0.4059 | -0.8184 |
| PKH_143870 | -0.0403 | 0.00153 | -0.0104 | 0.19685 | 0.03731 | -0.1636 | -0.1499 |
| PKH_060520 | -0.4229 | -0.6451 | -0.4472 | -0.0768 | -0.1248 | 0.11869 | -0.4369 |
| PKH_131410 | -0.0526 | -0.4085 | -0.4325 | -0.6386 | -0.1822 | 0.12434 | 0.42942 |
| PKH_040090 | 0.49155 | 0.85186 | 1.07778 | 1.04409 | 0.65948 | 0.57683 | 0.70301 |
| PKH_141550 | -0.745  | -0.6762 | -0.551  | 0.19853 | -0.0527 | 0.01067 | 0.31554 |
| PKH_100840 | 0.87593 | 0.54168 | 0.1971  | -0.1217 | 0.01494 | 0.18877 | 0.16754 |
| PKH_133910 | 0.2353  | -0.1271 | -0.2553 | -0.4576 | -0.6213 | -0.4526 | -0.0474 |
| PKH_112510 | 0.71743 | 0.79613 | 0.79195 | 0.60688 | 0.47479 | 0.3177  | 0.13791 |
| PKH_133550 | -0.0788 | 0.00691 | 0.20445 | 0.12984 | 0.31803 | 0.14292 | 0.20674 |
| PKH_125680 | -0.4901 | -0.5817 | -0.6713 | -0.6479 | -0.5696 | -0.423  | 0.06144 |
| PKH_142400 | 0.52204 | 0.39465 | 0.37294 | 0.08982 | 0.19131 | 0.2861  | 0.97205 |
| PKH_125660 | 0.99171 | 0.9181  | 0.73578 | 0.67434 | 0.70486 | 0.80213 | 0.92833 |
| PKH_030960 | 0.16209 | 0.0261  | -0.2881 | -0.273  | -0.3553 | -0.4255 | -0.0807 |
| PKH_093630 | -0.4589 | -0.3618 | -0.2828 | -0.2053 | -0.2805 | -0.3614 | -0.5231 |
| PKH_073140 | 0.05129 | 0.60944 | 0.77168 | 0.85115 | 0.44092 | 0.17593 | -0.3342 |
| PKH_143510 | 0.38529 | 0.08913 | 0.06995 | 0.18601 | 0.343   | 0.87162 | 1.41516 |
| PKH_070010 | -0.5712 | -0.4933 | -0.5397 | -0.2237 | 0.11803 | -0.0571 | -0.6638 |
| PKH_031640 | -0.3092 | -0.2246 | -0.16   | -0.3488 | 0.0771  | -0.0223 | -0.2094 |
| PKH_091670 | 0.02904 | 0.04084 | -0.3194 | -0.3244 | -0.443  | -0.5519 | -1.3668 |
| PKH_113320 | 0.08091 | -0.038  | 0.04933 | 0.05598 | -0.1395 | -0.2621 | 0.00064 |
| PKH_083810 | 0.11136 | -0.1415 | -0.3132 | -0.559  | -0.3993 | 0.44678 | 1.14234 |
| PKH_146280 | 0.52111 | 0.20069 | 0.16806 | 0.08648 | 0.47559 | 0.12935 | -1.0553 |
| PKH_142530 | -0.1383 | 0.44121 | 0.86435 | 1.063   | 0.98565 | 0.6759  | 0.2917  |
| PKH_144240 | 0.64572 | 0.62422 | 0.53586 | 0.34443 | 0.5027  | 0.27782 | 0.19784 |
| PKH_140660 | 0.09172 | 0.11412 | -0.008  | 0.00865 | 0.13183 | 0.23586 | 0.5713  |
| PKH_040060 | 0.98882 | 0.82354 | 0.39238 | -0.0768 | -0.0997 | 0.64002 | 1.4356  |

|            |         |         |         |         |         |         |         |
|------------|---------|---------|---------|---------|---------|---------|---------|
| PKH_070600 | -0.2412 | -0.3096 | -0.5744 | -1.1024 | -0.955  | -1.0447 | -0.9134 |
| PKH_124180 | -0.2751 | 0.09235 | 0.12433 | 0.24599 | 0.01066 | -0.1975 | -0.5489 |
| PKH_083280 | 0.70922 | 0.68787 | 0.40009 | 0.27546 | 0.04441 | -0.1128 | -0.3655 |
| PKH_072360 | -0.0007 | -0.1435 | -0.089  | -0.2676 | -0.2396 | -0.2319 | 0.04356 |
| PKH_126140 | -0.4776 | -0.0786 | 0.16595 | 0.33011 | -0.1439 | -0.4916 | -0.4192 |
| PKH_101700 | -0.6931 | -1.0625 | -0.7921 | -0.7454 | -0.3142 | 0.21961 | -0.0731 |
| PKH_101440 | 0.60387 | 0.66089 | 0.93038 | 0.84235 | 0.91356 | 0.65687 | 0.56822 |
| PKH_082100 | 0.13291 | 0.38658 | 0.17475 | 0.1116  | -0.1343 | -0.4291 | -0.7101 |
| PKH_100310 | 0.50274 | 0.68761 | 0.76541 | 0.34038 | 0.11535 | -0.4253 | -0.693  |
| PKH_123830 | 0.61259 | 0.55909 | 0.46291 | 0.25054 | 0.23443 | 0.2344  | 0.58789 |
| PKH_132990 | 0.65451 | 0.40432 | 0.27274 | 0.13934 | 0.43201 | 0.4209  | 0.7904  |
| PKH_146210 | 0.27438 | 0.27153 | -0.0821 | 0.13234 | -0.0506 | 0.07355 | -0.0307 |
| PKH_080470 | -0.0848 | 0.0605  | -0.2073 | -0.2556 | -0.0006 | -0.0207 | -0.0725 |
| PKH_100720 | -0.024  | 0.22476 | -0.0985 | -0.2085 | -0.2655 | -0.0795 | 0.06726 |
| PKH_060550 | -0.1379 | -0.3113 | -0.3693 | -0.2751 | -0.1973 | -0.0856 | -0.1816 |
| PKH_112330 | 0.34078 | 0.06174 | 0.26331 | 0.10663 | 0.02853 | 0.3699  | 0.34741 |
| PKH_120590 | 0.17984 | 0.15998 | 0.28221 | 0.44972 | 0.68822 | 0.74215 | 0.81005 |
| PKH_141470 | 0.90538 | 0.65902 | 0.6349  | 0.73951 | 0.73957 | 0.67127 | 1.08711 |
| PKH_020470 | -0.2965 | -0.439  | -0.5095 | -0.5683 | -0.5102 | -0.549  | -0.5476 |
| PKH_124890 | -0.3263 | -0.1254 | -0.0743 | 0.62543 | 0.1512  | 0.20267 | 0.01924 |
| PKH_060640 | 0.60061 | 0.30271 | 0.24479 | 0.23332 | -0.0587 | -0.1756 | -0.59   |
| PKH_145810 | 0.12899 | 0.15068 | -0.1287 | 0.20942 | -0.1833 | -0.3217 | -1.6574 |
| PKH_125780 | -0.105  | -0.0491 | -0.0087 | -0.0978 | -0.0113 | -0.0492 | 0.08356 |
| PKH_081760 | 0.36244 | 0.04584 | 0.15852 | 0.06913 | 0.16606 | 0.14976 | -0.1216 |
| PKH_021200 | -0.3516 | -0.3844 | -0.2487 | -0.3588 | -0.4597 | -0.2912 | -0.0952 |
| PKH_134320 | 0.10554 | 0.27886 | 0.23738 | 0.20199 | 0.43138 | 0.47443 | 0.35451 |
| PKH_101000 | 0.56583 | 0.69502 | 0.73189 | 0.80194 | 0.29003 | 0.41559 | -0.091  |
| PKH_051650 | -0.5176 | -0.4367 | -0.8907 | -0.9361 | -1.0386 | -0.984  | -1.4874 |
| PKH_133280 | 0.19178 | 0.29834 | 0.34916 | 0.36592 | 0.30141 | 0.24227 | 0.31497 |
| PKH_111490 | 0.15677 | 0.24144 | 0.11256 | 0.15558 | 0.33293 | 0.18503 | -0.2677 |
| PKH_072800 | -0.0675 | 0.05576 | 0.85853 | 1.05857 | 0.99253 | 0.66359 | 0.86988 |
| PKH_143010 | 0.23485 | 0.26119 | 0.28753 | 0.11121 | 0.22947 | 0.20753 | 0.48459 |
| PKH_090690 | 0.46449 | 0.32108 | 0.27022 | -0.1333 | 0.07473 | 0.32302 | 0.6546  |
| PKH_052140 | 0.02835 | -0.0888 | 0.04907 | 0.05164 | 0.09456 | -0.2526 | -0.9342 |
| PKH_112310 | 0.66877 | 0.64855 | 0.66202 | 0.51634 | 0.47887 | 0.21682 | 0.11735 |
| PKH_102970 | -0.9772 | -0.7979 | -0.8254 | -0.6116 | -0.5723 | -0.4675 | -0.4867 |
| PKH_093480 | 0.01062 | -0.3271 | -0.6038 | -0.6302 | -0.0962 | 0.57394 | 0.71022 |
| PKH_091680 | 0.14932 | 0.12828 | 0.03186 | 0.47556 | 0.17562 | -0.0111 | -0.0443 |
| PKH_072040 | -0.1222 | -0.1458 | -0.1333 | -0.1431 | -0.3047 | -0.1633 | -1.3266 |
| PKH_110490 | -0.1527 | -0.28   | -0.1254 | 0.0362  | -0.0558 | 0.14374 | 0.24891 |
| PKH_134420 | -0.0174 | 0.05245 | -0.1008 | -0.154  | -0.2167 | -0.141  | -0.1239 |
| PKH_083140 | -0.3799 | -0.5683 | -0.7096 | -0.6456 | -0.1263 | 0.13668 | 0.05845 |
| PKH_071110 | 0.56814 | 0.53866 | 0.6732  | 0.46025 | 0.34875 | 0.26369 | 0.13671 |
| PKH_010440 | -0.2684 | -0.1212 | -0.257  | -0.1325 | -0.3982 | -0.5555 | -1.1373 |
| PKH_083730 | 0.04201 | 0.03212 | 0.19965 | 0.4354  | 0.23298 | 0.2225  | 0.0457  |
| PKH_061700 | 0.51684 | 0.71196 | 0.59334 | 0.6163  | 0.23726 | 0.2574  | 0.10758 |
| PKH_142910 | 0.12884 | 0.54375 | 0.34307 | 0.25692 | 0.253   | 0.09868 | -0.0517 |
| PKH_010610 | -1.769  | -1.6619 | -1.7305 | -1.6477 | -1.7877 | -1.9226 | -3.9873 |
| PKH_093540 | 0.1776  | 0.08341 | -0.1607 | 0.00628 | 0.15396 | 0.04414 | -0.0999 |
| PKH_010410 | -0.9662 | -1.3097 | -0.9433 | -1.0445 | -1.3891 | -1.403  | -2.356  |
| PKH_031470 | -0.1504 | 0.13672 | -0.2401 | -0.1803 | -0.2451 | -0.3697 | -1.0976 |
| PKH_142330 | 1.18248 | 1.427   | 1.41722 | 1.04777 | 0.70254 | 0.16201 | -0.2666 |
| PKH_091920 | 0.36718 | 0.55581 | 0.5898  | 0.92388 | 0.5942  | 0.35161 | 0.62261 |
| PKH_111770 | -0.0713 | -0.1343 | -0.2339 | -0.3212 | -0.1865 | -0.3298 | -0.2371 |
| PKH_031370 | -0.3664 | -0.3174 | -0.3701 | 0.06957 | -0.2415 | -0.2687 | -0.6398 |
| PKH_125850 | 0.71948 | 0.81684 | 0.41438 | 0.22689 | 0.02666 | -0.0862 | -0.1935 |
| PKH_124360 | 0.25076 | 0.14597 | 0.11632 | -0.0165 | 0.0832  | 0.11968 | 0.22481 |
| PKH_011080 | -0.2004 | 0.22351 | -0.1226 | 0.1505  | 0.18147 | -0.0667 | -0.7694 |
| PKH_031530 | -0.8263 | -0.8384 | -0.9103 | -0.8664 | -0.9433 | -0.9305 | -1.5805 |
| PKH_020650 | -0.1396 | -0.4612 | -0.7648 | -2.7205 | -1.0062 | -0.8421 | -0.7194 |
| PKH_121820 | -2.1083 | -2.2532 | -2.0927 | -1.5939 | -0.7536 | -0.1262 | -0.1484 |
| PKH_141110 | -0.7925 | -0.7758 | -0.6193 | -1.1742 | -0.7503 | -0.582  | -0.5647 |
| PKH_070570 | -0.3609 | -0.067  | 0.10518 | 0.34455 | 0.15836 | 0.0372  | 0.03545 |



|            |         |         |         |         |         |         |         |
|------------|---------|---------|---------|---------|---------|---------|---------|
| PKH_133540 | 0.24225 | -0.025  | 0.06539 | -0.0772 | 0.16996 | 0.07899 | 0.17143 |
| PKH_093730 | -0.616  | -0.5956 | -0.4185 | -0.4925 | -0.4915 | -0.4994 | -0.5477 |
| PKH_060950 | 0.38922 | 0.53219 | 0.53857 | 0.67695 | 0.19758 | -0.1478 | -0.2942 |
| PKH_090540 | 0.39161 | 0.18653 | 0.03691 | 0.26902 | 0.47743 | 0.97944 | 1.18237 |
| PKH_040130 | 0.23076 | 0.44723 | 0.65204 | 1.01535 | 0.58241 | 0.38447 | 0.53582 |
| PKH_112590 | 0.33502 | 0.03663 | 0.16504 | 0.40455 | 0.04718 | -0.2315 | -1.3882 |
| PKH_111850 | -0.4583 | -0.7431 | -0.8374 | -0.4125 | -0.2625 | -0.2573 | -0.4216 |
| PKH_100520 | -1.396  | -1.2685 | -1.3157 | -0.9828 | -1.0807 | -1.1186 | -1.1904 |
| PKH_091110 | -0.7327 | -0.5667 | -0.5006 | -0.4079 | -0.4497 | -0.5209 | -0.6683 |
| PKH_102730 | -0.3689 | -0.3172 | -0.0088 | -0.2992 | -0.003  | -0.0342 | 0.03608 |
| PKH_114000 | -0.0231 | 0.01658 | -0.0711 | 0.00122 | -0.1217 | 0.04687 | -0.449  |
| PKH_080250 | -0.0146 | -0.1235 | -0.1182 | -0.1929 | -0.3403 | -0.3412 | -1.5317 |
| PKH_143090 | -0.2232 | -0.1976 | 0.26576 | 0.0429  | 0.21706 | 0.07476 | 0.23166 |
| PKH_110720 | -0.3715 | -0.2932 | -0.3837 | -0.4342 | -0.2089 | -0.1406 | -0.316  |
| PKH_040110 | 0.84397 | 0.92786 | 0.96441 | 0.70659 | 0.71939 | 0.54771 | 0.48553 |
| PKH_020230 | -0.1734 | -0.2189 | -0.2524 | -0.0695 | -0.1978 | -0.1623 | -1.5252 |
| PKH_100080 | 0.49355 | 0.4475  | 0.617   | 0.63104 | 0.51492 | 0.49743 | 0.18645 |
| PKH_011690 | -0.0584 | -0.3133 | -0.2905 | -0.4019 | -0.7235 | -0.4133 | 0.12317 |
| PKH_071030 | 0.1906  | -0.0105 | -0.1664 | -0.0062 | -0.3093 | -0.1351 | 0.18358 |
| PKH_060960 | -0.6345 | -0.7769 | -0.6441 | -0.337  | -0.1711 | -0.0917 | 0.21771 |
| PKH_040440 | 1.21291 | 1.22767 | 1.17491 | 1.40007 | 1.21291 | 0.66611 | 0.71566 |
| PKH_141400 | -0.126  | 0.32421 | 0.07203 | 0.28062 | -0.0682 | -0.1281 | -1.1287 |
| PKH_145670 | -0.8214 | -1.119  | -0.7336 | 0.04479 | 0.79254 | 1.23358 | 1.1092  |
| PKH_120980 | 0.11492 | 0.20431 | 0.34065 | 0.4309  | 0.53408 | 0.22093 | -0.8666 |
| PKH_120790 | 0.0488  | -0.7318 | -1.2282 | -1.5657 | -0.9167 | 0.16042 | 0.80989 |
| PKH_111870 | -0.0261 | -0.1089 | 0.0223  | 0.11863 | 0.1383  | -0.1268 | -0.238  |
| PKH_101650 | 0.82069 | 0.68705 | 0.66249 | 0.54168 | 0.22739 | 0.12798 | 0.42344 |
| PKH_144070 | -0.5468 | -0.8955 | -0.3124 | 0.12842 | 0.08006 | -0.0059 | 0.28753 |
| PKH_120550 | 0.36715 | 0.53563 | 0.78991 | 0.88157 | 0.96471 | 0.80853 | 0.41702 |
| PKH_040430 | -0.3713 | -0.573  | -0.6099 | -0.6319 | -0.8466 | -0.8171 | -0.3717 |
| PKH_126120 | 0.19165 | 0.04201 | -0.0059 | -0.2635 | -0.106  | -0.1757 | 0.22526 |
| PKH_103040 | -0.3648 | -1.4873 | -0.4053 | -0.2869 | -0.4076 | -0.4897 | -0.489  |
| PKH_010300 | -1.0187 | -1.1585 | -0.6996 | -0.3151 | -0.0343 | 0.12161 | -0.4221 |
| PKH_141990 | -0.4841 | -0.1889 | -0.1593 | 0.16767 | -0.2135 | -0.2098 | -0.1287 |
| PKH_051800 | -0.3111 | -0.2139 | -0.4416 | -0.0069 | -0.3507 | -0.6672 | -1.3127 |
| PKH_101160 | 0.47655 | 0.7706  | 0.6175  | 0.56073 | 0.25761 | 0.0094  | 0.04461 |
| PKH_091980 | 0.47747 | 0.51681 | 0.29946 | 0.27426 | 0.24209 | 0.04533 | -0.1237 |
| PKH_113480 | -0.446  | -0.4939 | -0.6428 | -0.7116 | -0.6407 | -0.5563 | -0.4047 |
| PKH_050810 | -0.6491 | -1.3715 | -1.9374 | -1.9096 | -0.2779 | 0.85487 | 1.04012 |
| PKH_040450 | -0.5536 | -0.7883 | -0.7071 | -1.1704 | -0.7546 | -0.7317 | -1.0875 |
| PKH_143240 | -0.2429 | -0.0885 | -0.13   | -0.0268 | -0.3187 | -0.288  | -1.6163 |
| PKH_090910 | 0.66663 | 0.8909  | 1.02476 | 0.8777  | 0.78026 | 0.53411 | 0.34866 |
| PKH_060410 | -0.4443 | -0.5486 | -0.6903 | -0.6161 | -0.4059 | -0.5173 | -0.6183 |
| PKH_126270 | 0.07226 | 0.12338 | 0.26891 | 0.32267 | 0.22114 | 0.14712 | -1.264  |
| PKH_146540 | 0.48032 | 0.54838 | 0.37601 | 0.34149 | 0.55459 | 0.4135  | 0.56934 |
| PKH_101210 | -0.0615 | 0.05657 | 0       | 0.1737  | -0.4107 | -0.4701 | -0.2064 |
| PKH_041020 | -0.4894 | -0.5222 | -0.5221 | -0.8076 | -0.7355 | -0.6194 | -0.4805 |
| PKH_031850 | -0.2722 | -0.031  | -0.1264 | -0.2313 | -0.3358 | -0.8248 | -1.0865 |
| PKH_120370 | 0.05944 | 0.14668 | 0.33965 | 0.08608 | -0.0906 | -0.1424 | 0.09774 |
| PKH_082750 | -0.6126 | -0.186  | 0.38799 | 1.12698 | 0.53433 | 0.23696 | 0.20199 |
| PKH_121970 | 0.09728 | 0.06731 | 0.07257 | 0.1466  | 0.17729 | 0.08805 | 0.06026 |
| PKH_070280 | -1.0394 | -0.7901 | -0.6449 | -0.8325 | -0.604  | -0.721  | -1.0031 |
| PKH_130660 | -1.4199 | -1.3814 | -1.424  | -1.104  | -0.812  | -0.5037 | -0.0978 |
| PKH_030540 | -1.5534 | -1.4259 | -1.4665 | -1.4847 | -1.5501 | -1.5803 | -2.5831 |
| PKH_124340 | -0.4536 | -0.6331 | -0.6415 | -0.5161 | -0.4583 | -0.4177 | -1.6468 |
| PKH_124640 | -0.2237 | 0.23656 | 0.71244 | 0.87228 | 0.38855 | 0.3324  | 0.08097 |
| PKH_111180 | -0.4683 | -0.7719 | -0.7072 | -1.2014 | -1.049  | -0.7438 | -0.6065 |
| PKH_131180 | 0.30952 | 0.2194  | 0.20172 | 0.58642 | 0.74932 | 1.0709  | 1.12751 |
| PKH_061370 | 0.11246 | 0.10295 | 0.31115 | 0.38115 | 0.40281 | 0.67846 | 0.48136 |
| PKH_070510 | 0.30824 | 0.67575 | 0.64195 | 0.65817 | 0.33355 | 0.28848 | 0.10909 |
| PKH_133270 | -0.5003 | -0.416  | 0.23124 | 0.74344 | 0.88473 | 0.6985  | 0.35818 |
| PKH_114330 | -0.2402 | -0.3022 | -0.3364 | -0.6616 | -0.7953 | -0.6082 | -0.1848 |
| PKH_141600 | 0.18727 | 0.35599 | 0.30411 | 0.54051 | 0.29582 | 0.21356 | 0.41103 |

|            |         |         |         |         |         |         |         |
|------------|---------|---------|---------|---------|---------|---------|---------|
| PKH_073250 | -0.5056 | -0.2728 | -0.5306 | -0.5215 | -0.5041 | -0.3506 | -0.6759 |
| PKH_091890 | -0.2934 | -0.2138 | -0.2618 | -0.018  | -0.3822 | -0.5332 | -0.294  |
| PKH_145490 | -0.0177 | 0.22823 | 0.39151 | 0.75312 | 0.26599 | 0.25733 | 0.44909 |
| PKH_126000 | 0.05477 | 0.12899 | 0.09227 | 0.13595 | 0.13346 | 0.28594 | -1.003  |
| PKH_021590 | 1.07054 | 0.53663 | 0.16084 | -0.3179 | -0.6371 | -0.0232 | 1.15227 |
| PKH_111790 | -0.4443 | -0.5981 | -0.5986 | -0.1391 | 0.1594  | 0.27786 | -0.0625 |
| PKH_072200 | 0.00979 | -0.0592 | -0.0887 | 0.24726 | 0.41163 | 0.46357 | 0.15638 |
| PKH_131720 | 0.08268 | -0.6108 | -1.1559 | -1.4735 | -1.123  | -0.2447 | 0.46124 |
| PKH_102860 | -0.3946 | -0.375  | -0.6506 | -0.6004 | -0.7441 | -0.9382 | -0.8662 |
| PKH_122580 | 0.195   | 0.27326 | 0.45738 | 0.36879 | 0.54471 | 0.32258 | 0.35699 |
| PKH_122960 | -0.7286 | -1.0048 | -1.1987 | -0.2357 | -0.1751 | 0.49157 | 0.72864 |
| PKH_120970 | -0.0119 | 0.00916 | -0.1234 | -0.2161 | -0.1814 | -0.0478 | -0.5775 |
| PKH_070490 | -0.3622 | -0.5898 | -0.7283 | -0.9606 | -1.1231 | -1.0637 | -1.1919 |
| PKH_141300 | 0.07301 | 0.02899 | 0.02726 | 0.00506 | -0.2038 | -0.3464 | -0.2015 |
| PKH_140980 | 0.95207 | 1.14023 | 1.10592 | 0.78466 | 0.68569 | 0.56274 | 0.75564 |
| PKH_071370 | 0.07842 | 0.31881 | 0.05932 | 0.23691 | 0.01126 | -0.0988 | -0.2213 |
| PKH_083460 | -0.4262 | -0.6421 | -0.4574 | -0.8851 | -0.6809 | -1.0948 | -0.1251 |
| PKH_071470 | -0.3337 | -0.2621 | -0.1164 | -0.2134 | 0.10307 | 0.23431 | 0.05076 |
| PKH_071250 | -0.0411 | 0.16866 | 0.41916 | 0.37482 | -0.091  | -0.3052 | -0.3188 |
| PKH_103240 | 0.47122 | 0.35071 | 0.22986 | -0.2138 | -0.1435 | -0.2269 | -0.1585 |
| PKH_080910 | 0.05678 | -0.1246 | -0.0606 | 0.12373 | 0.49953 | 0.43926 | -0.5148 |
| PKH_081720 | 0.18775 | 0.11109 | 0.15938 | 0.11171 | 0.22878 | 0.12461 | 0.20425 |
| PKH_145530 | 1.16164 | 1.44272 | 1.47255 | 1.52167 | 1.2516  | 0.82315 | 0.81291 |
| PKH_126850 | -0.1076 | -0.0343 | 0.10603 | 0.02189 | -0.0982 | 0.04777 | -0.2488 |
| PKH_113570 | -0.6472 | -0.7757 | -0.2695 | -0.3582 | -0.0251 | 0.5126  | 0.59192 |
| PKH_133420 | 0.15724 | 0.37602 | 0.53458 | 0.33715 | 0.1921  | -0.0266 | -0.3239 |
| PKH_010200 | 0.03396 | 0.00178 | -0.2775 | -0.5487 | -0.7175 | -0.864  | -0.8767 |
| PKH_100130 | 0.04194 | 0.04569 | 0.16991 | -0.1379 | -0.3027 | -0.3794 | -0.1666 |
| PKH_144720 | 0.34178 | 0.3156  | 0.48275 | 0.08831 | 0.42889 | 0.35061 | 0.53947 |
| PKH_091800 | 0.04569 | -0.0065 | 0.31841 | 0.26402 | 0.30351 | 0.22037 | -0.0331 |
| PKH_083130 | 0.13004 | 0.32599 | 0.64142 | 0.82559 | 0.43028 | 0.38401 | 0.0939  |
| PKH_040420 | -1.6011 | -1.2445 | -1.7026 | -1.7259 | -1.6348 | -1.5676 | -3.4939 |
| PKH_133460 | -0.0719 | -0.2607 | -0.2122 | -0.1459 | -0.0913 | -0.0744 | 0.00474 |
| PKH_091690 | -0.4621 | -0.5188 | -0.6111 | -0.7119 | -0.5705 | -0.3332 | -0.6643 |
| PKH_145060 | -0.059  | -0.0841 | -0.3753 | -0.4294 | -0.5295 | -0.4131 | 0.02237 |
| PKH_131790 | 0.51151 | -0.0381 | -0.6076 | -1.3367 | -1.2561 | -1.3299 | -1.0213 |
| PKH_130220 | -0.1922 | -0.3497 | -0.2971 | -0.2968 | -0.3768 | -0.4454 | -0.0972 |
| PKH_113510 | -0.2155 | -1.0167 | -1.351  | -1.2086 | 0.49058 | 1.05505 | 1.18163 |
| PKH_121960 | -0.6808 | -0.3644 | -0.1829 | 0.22083 | 0.18103 | 0.01944 | -0.0102 |
| PKH_092020 | -0.4208 | -0.3218 | -0.3781 | 0.07231 | -0.0308 | 0.05728 | -0.327  |
| PKH_041120 | -0.0051 | -0.0503 | -0.2857 | 0.09341 | -0.3633 | -0.1872 | -0.0182 |
| PKH_112660 | -0.2447 | -0.1712 | -0.0826 | 0.15189 | 0.15046 | 0.38785 | 0.20204 |
| PKH_132910 | 0.49232 | 0.42266 | 0.39965 | 0.45123 | 0.21857 | 0.36107 | 0.55651 |
| PKH_094140 | 0.15714 | 0.59635 | 0.68339 | 0.7828  | 0.56119 | 0.61267 | 0.25409 |
| PKH_122100 | 0.38575 | 0.33034 | 0.33813 | 0.18678 | -0.1362 | -0.1193 | 0.15817 |
| PKH_050620 | 0.13431 | 0.00173 | -0.0485 | -0.4621 | 0.15797 | -0.0946 | -0.2918 |
| PKH_100830 | 0.14899 | 0.08998 | -0.1199 | 0.10212 | -0.197  | -0.2165 | 0.11467 |
| PKH_125590 | 0.25372 | 0.29713 | 0.25703 | 0.1469  | 0.19416 | 0.15414 | -0.0298 |
| PKH_083780 | 0.06292 | 0.09834 | 0.3557  | 0.20908 | -0.0668 | -0.1698 | -0.2332 |
| PKH_120150 | 0.27612 | 0.40361 | 0.8702  | 0.95239 | 0.68311 | 0.78923 | 0.13374 |
| PKH_122240 | 0.28101 | 0.34448 | 0.35997 | 0.39226 | -0.027  | -0.0803 | -0.0046 |
| PKH_132870 | -1.0071 | -1.0675 | -1.4937 | -1.5205 | -1.2413 | -0.7719 | -0.4341 |
| PKH_143310 | 0.23632 | 0.23933 | 0.28965 | 0.21587 | -0.0412 | -0.0717 | -0.3509 |
| PKH_130080 | 0.51214 | 0.59654 | 0.70785 | 0.6644  | 0.94042 | 0.59563 | 0.49868 |
| PKH_141440 | 0.27498 | 0.23673 | 0.40615 | 0.22477 | 0.28609 | 0.36951 | 0.58606 |
| PKH_123420 | 0.25274 | -0.0745 | -0.1816 | -0.748  | -0.7247 | -0.5807 | 0.02871 |
| PKH_083560 | 0.1309  | 0.10362 | 0.15602 | 0.10295 | 0.23159 | 0.14344 | 0.11664 |
| PKH_140830 | 0.65    | 0.50478 | 0.92579 | 0.81675 | 0.80813 | 0.75857 | 1.03697 |
| PKH_052350 | 0.78569 | 1.20296 | 1.15896 | 1.27039 | 0.87147 | 0.6294  | 0.63313 |
| PKH_112800 | -0.4173 | -0.5313 | -0.6178 | -0.5916 | -0.4757 | -0.2968 | -0.5359 |
| PKH_121950 | 1.08633 | 1.31256 | 1.50277 | 1.45409 | 1.1343  | 0.79154 | 0.72643 |
| PKH_125890 | 0.56665 | 0.46553 | 0.6096  | 0.44467 | 0.45336 | 0.42449 | 0.44025 |
| PKH_062080 | 0.51438 | 1.01791 | 1.02176 | 1.32507 | 0.72682 | 0.31307 | -0.2789 |

|            |         |         |         |         |         |         |         |
|------------|---------|---------|---------|---------|---------|---------|---------|
| PKH_101970 | 0.21766 | 0.19186 | 0.33985 | 0.0026  | -0.1712 | -0.1605 | -0.4311 |
| PKH_121520 | -0.4331 | -0.2419 | -0.2604 | -0.144  | -0.1279 | -0.4328 | -0.9425 |
| PKH_146470 | 0.89778 | 0.50788 | 0.35352 | 0.13024 | -0.1108 | 0.00842 | 0.69186 |
| PKH_011230 | -1.4944 | -1.3586 | -0.8023 | -1.7634 | -0.6916 | -1.0163 | -1.6953 |
| PKH_124080 | 0.02248 | 0.05816 | 0.27223 | 0.0997  | 0.1489  | -0.1181 | -1.3426 |
| PKH_020840 | -1.0844 | -1.0313 | -1.4333 | -1.5212 | -1.2104 | -1.081  | -1.5662 |
| PKH_092070 | -0.5221 | -0.4927 | -0.5012 | -0.3559 | -0.4497 | -0.3862 | -1.8559 |
| PKH_090500 | 0.79462 | 0.754   | 0.60385 | 0.46551 | 0.38165 | 0.4142  | 0.68132 |
| PKH_125300 | 0.04974 | 0.1926  | 0.24834 | 0.37123 | 0.01852 | 0.1001  | 0.47477 |
| PKH_141850 | -0.4431 | -0.7776 | -0.9711 | -1.3236 | -1.1484 | -0.9319 | -0.2889 |
| PKH_050700 | -0.1317 | -0.207  | -0.4601 | -0.2314 | -0.4252 | -0.4789 | -1.9227 |
| PKH_080640 | -0.4803 | -0.6263 | -0.5903 | -0.4691 | -0.5223 | -0.4575 | -0.505  |
| PKH_093270 | 0.42886 | 0.24397 | 0.42061 | 0.59106 | 0.49968 | 0.29643 | 0.12788 |
| PKH_110310 | -0.2713 | -0.3634 | -0.8612 | -0.8038 | -0.5381 | -0.6299 | -0.7219 |
| PKH_020420 | -0.3314 | -0.1653 | -0.3864 | -0.2679 | -0.7115 | -0.9581 | -2.6067 |
| PKH_131520 | 0.74448 | 0.648   | 0.55731 | 0.56569 | 0.65417 | 0.58984 | 0.73602 |
| PKH_114880 | 0.54159 | -0.0016 | -0.5395 | -0.959  | -0.1894 | 0.58622 | 1.25512 |
| PKH_040360 | -0.1153 | -0.0586 | 0.05216 | 0.17194 | 0.17834 | 0.40593 | -1.3415 |
| PKH_100950 | -0.9188 | -0.5025 | -0.3003 | -0.0641 | -0.2326 | -0.5254 | -1.0714 |
| PKH_140280 | 0.55195 | 0.46943 | 0.63592 | 0.36037 | 0.14519 | 0.04271 | 0.07984 |
| PKH_110290 | 0.06823 | -0.1204 | -0.2292 | -0.6002 | -0.3919 | -0.1648 | 0.1549  |
| PKH_010820 | -0.5897 | -0.4752 | -0.2844 | -0.8231 | -0.3814 | -0.4135 | -0.5496 |
| PKH_125180 | 0.50197 | 0.63835 | 0.58853 | 0.55229 | 0.39612 | 0.07556 | 0.03289 |
| PKH_052700 | -0.8359 | -1.2254 | -1.1496 | -0.3356 | 0.38802 | 0.45053 | 0.92182 |
| PKH_081650 | -0.5511 | -0.6766 | -0.4016 | -0.3688 | -0.3387 | -0.3026 | -0.3743 |
| PKH_030330 | -0.0712 | 0.11099 | -0.1483 | -0.0257 | -0.3156 | -0.2206 | -0.2256 |
| PKH_061890 | -0.2394 | -0.1934 | -0.1317 | -0.0077 | -0.2787 | 0.06002 | -1.3698 |
| PKH_102720 | -0.25   | -0.0593 | 0.25809 | 0.25964 | 0.31301 | 0.14684 | -0.1658 |
| PKH_061450 | -0.446  | -0.3284 | -0.7226 | -0.3688 | -0.2688 | -0.0751 | -1.6073 |
| PKH_052070 | 0.48632 | 0.88427 | 0.58553 | 0.96773 | 0.28572 | 0.26912 | 0.02918 |
| PKH_030440 | -0.8229 | -0.8097 | -0.9206 | -1.0215 | -0.8906 | -0.8652 | -1.3707 |
| PKH_143750 | -0.0724 | -0.0314 | 0.12486 | 0.29781 | 0.26856 | 0.27813 | 0.34917 |
| PKH_091880 | -0.0422 | -0.1587 | 0.07405 | -0.1098 | 0.00295 | -0.1822 | -0.358  |
| PKH_144510 | -0.5295 | 0.0571  | 0.28983 | 0.1097  | -0.0681 | 0.16564 | 0.13183 |
| PKH_122430 | -0.6133 | -0.3729 | -0.5039 | 0.14478 | 0.52392 | 0.61196 | 0.23526 |
| PKH_143070 | 0.26353 | 0.21836 | 0.45815 | 0.0857  | 0.17756 | 0.26527 | -0.1482 |
| PKH_114630 | 0.1704  | 0.13986 | -0.0217 | 0.10688 | -0.0875 | -0.2149 | -0.3272 |
| PKH_050140 | 0.11439 | 0.02886 | 0.07864 | 0.23585 | 0.20815 | -0.085  | -0.5385 |
| PKH_082440 | 0.14233 | 0.43849 | 0.36042 | 0.57474 | 0.25935 | 0.21094 | 0.13339 |
| PKH_133480 | 0.79221 | 1.075   | 0.8938  | 1.02835 | 0.58119 | 0.26905 | 0.24357 |
| PKH_103050 | 0.98818 | 1.31127 | 1.29854 | 1.62    | 1.39328 | 0.92089 | 0.69215 |
| PKH_146780 | -0.5775 | -0.2983 | -0.2893 | -0.5819 | -0.3091 | -0.2539 | 0.06398 |
| PKH_120170 | 0.40782 | 0.38922 | 0.42301 | 0.24744 | 0.20093 | 0.14697 | 0.23844 |
| PKH_091280 | 0.27258 | 0.63794 | 0.92091 | 1.0786  | 1.04843 | 0.70108 | 0.55242 |
| PKH_020730 | -0.8048 | -0.2718 | -0.0802 | 0.02836 | -0.2057 | -0.5271 | -1.211  |
| PKH_093610 | 0.82177 | 1.07028 | 1.03557 | 1.11847 | 0.79337 | 0.74538 | 0.79567 |
| PKH_082730 | 0.45147 | 0.38023 | 0.14196 | -0.1756 | -0.1954 | -0.4025 | -0.0389 |
| PKH_124680 | 0.03233 | -0.0767 | 0.07495 | 0.16272 | 0.05379 | 0.09811 | -1.1039 |
| PKH_052150 | -0.281  | -0.2002 | -0.2991 | -0.5195 | -0.8057 | -0.809  | -0.7668 |
| PKH_071420 | 0.99685 | 1.07491 | 0.90659 | 1.18965 | 0.80266 | 0.96118 | 1.26388 |
| PKH_093620 | -0.3378 | -0.0984 | 0.3328  | 0.70123 | 0.71214 | 0.72948 | 0.43798 |
| PKH_090600 | -0.0286 | -0.0329 | -0.0103 | 0.03848 | -0.0742 | -0.2468 | -1.7302 |
| PKH_120360 | 0.33615 | 0.23005 | 0.10125 | 0.07474 | -0.1649 | 0.10237 | 0.36507 |
| PKH_071080 | -0.225  | 0.10943 | 0.02778 | -0.0579 | -0.1194 | -0.1962 | 0.05635 |
| PKH_142940 | 0.03834 | 0.27461 | 0.16224 | 0.10284 | 0.3315  | 0.25918 | 0.19252 |
| PKH_082720 | 1.01263 | 1.16637 | 1.08927 | 1.05944 | 0.55822 | 0.2092  | 0.34861 |
| PKH_060460 | -0.1546 | -0.2386 | -0.2851 | -0.301  | -0.2129 | -0.1043 | -0.0567 |
| PKH_111160 | -0.5518 | -0.1674 | 0.2929  | 0.29269 | 0.26908 | 0.13195 | -0.3702 |
| PKH_114090 | -0.1659 | -0.0451 | -0.1121 | 0.12501 | -0.1302 | 0.04706 | -1.4631 |
| PKH_101370 | -0.4402 | -0.5885 | -0.6148 | -0.4858 | -0.5514 | -0.6271 | -0.2187 |
| PKH_094170 | 0.16017 | 0.07779 | 0.13753 | -0.0501 | -0.0613 | -0.1051 | -0.367  |
| PKH_052520 | -0.4029 | -0.2219 | 0.49092 | 1.10767 | 0.94771 | 0.77507 | 0.88281 |
| PKH_041380 | -0.3802 | -0.5754 | -0.5469 | -0.7267 | -0.5635 | -0.4383 | -0.3246 |

|            |         |         |         |         |         |         |         |
|------------|---------|---------|---------|---------|---------|---------|---------|
| PKH_061950 | 0.2587  | 0.65335 | 0.94216 | 1.39775 | 0.92191 | 0.73111 | 0.67519 |
| PKH_092120 | -0.6998 | -0.3858 | -0.5218 | -0.4176 | -0.6847 | -0.7442 | -1.4283 |
| PKH_072100 | -0.9953 | -1.0057 | -1.087  | -1.3037 | -1.0423 | -1.1372 | -1.1569 |
| PKH_123590 | 0.10421 | 0.07905 | -0.2585 | -0.3099 | -0.752  | -0.6291 | -0.0108 |
| PKH_071980 | 0.29562 | 0.55658 | 0.37654 | 0.50963 | 0.61743 | 0.48088 | 0.42325 |
| PKH_092200 | -0.5026 | -0.2888 | -0.435  | -0.0936 | -0.2692 | -0.2934 | -1.874  |
| PKH_061920 | -0.017  | -0.0099 | -0.131  | -0.1737 | 0.19709 | -0.0134 | -0.1557 |
| PKH_090780 | 0.027   | 0.02842 | -0.1485 | -0.2194 | 0.23569 | 0.08603 | 0.00739 |
| PKH_071400 | -0.2474 | -0.6762 | -1.2167 | -1.5026 | -0.9487 | 0.22514 | 0.88947 |
| PKH_124830 | -0.1059 | 0.32937 | 0.62225 | 0.88192 | 0.62079 | 0.5986  | 0.51275 |
| PKH_093430 | 0.30582 | 0.1994  | 0.25385 | 0.31041 | 0.00238 | -0.139  | -0.0515 |
| PKH_072840 | -0.067  | 0.06206 | -0.0058 | -0.0311 | 0.02014 | -0.1523 | -0.3155 |
| PKH_020200 | 0.16111 | 0.3468  | 0.47774 | 0.45292 | 0.3152  | 0.13723 | -0.1272 |
| PKH_092750 | -0.1651 | -0.1475 | -0.3367 | -0.0006 | 0.03904 | -0.0755 | -0.1528 |
| PKH_131960 | -0.5211 | -0.1359 | -0.0064 | 0.21499 | -0.0851 | 0.00738 | -0.1835 |
| PKH_040260 | -1.1848 | -1.4046 | -1.5685 | -2.0758 | -1.2268 | -0.2494 | -0.062  |
| PKH_041580 | 1.40669 | 1.40677 | 1.43982 | 1.09702 | 0.96214 | 1.05278 | 1.38848 |
| PKH_110470 | 0.35102 | 0.4059  | -0.0221 | 0.09788 | 0.13895 | -0.039  | -1.1523 |
| PKH_011520 | -0.1003 | -0.3362 | -0.5174 | -0.683  | -0.5993 | -0.373  | -0.304  |
| PKH_081200 | 0.12741 | 0.0967  | -0.0357 | -0.1442 | -0.1474 | -0.2013 | -0.0016 |
| PKH_052190 | -0.642  | -0.417  | -0.4592 | -0.4285 | -0.5388 | -0.5633 | -0.6814 |
| PKH_126980 | 0.15162 | 0.05555 | 0.20618 | 0.12476 | 0.06586 | 0.07791 | -0.1497 |
| PKH_142670 | 0.67978 | 0.70202 | 0.74376 | 0.62352 | 0.77436 | 0.53941 | 0.73494 |
| PKH_094460 | -0.6505 | -0.5553 | 0.08526 | 0.40886 | 0.47984 | 0.54328 | 0.01103 |
| PKH_031950 | 0.00506 | 0.10356 | 0.31096 | 0.2684  | 0.07532 | 0.22691 | 0.31362 |
| PKH_081940 | 0.05663 | 0.34056 | 0.15688 | 0.49604 | 0.21523 | 0.21783 | 0.04891 |
| PKH_083430 | -0.7289 | -0.9959 | -0.6255 | -0.4551 | -0.3973 | -0.2408 | -0.2471 |
| PKH_052320 | -0.2721 | -0.2115 | -0.1534 | -0.0585 | -0.1772 | 0.15111 | 0.00364 |
| PKH_123530 | 0.3672  | 0.41766 | 0.86528 | 0.69395 | 0.57436 | 0.60162 | 0.41548 |
| PKH_070920 | 0.46193 | 0.5731  | 0.5059  | 0.46504 | 0.30612 | 0.05538 | 0.14146 |
| PKH_100940 | 0.18758 | 0.28806 | 0.50337 | 0.2244  | 0.06304 | -0.0803 | 0.21772 |
| PKH_070020 | 0.92998 | 1.10993 | 1.23157 | 1.42256 | 0.98942 | 0.6823  | 0.78794 |
| PKH_083300 | 0.81238 | 0.55085 | 0.53518 | 0.3229  | 0.21011 | 0.15104 | 0.61074 |
| PKH_110750 | -0.2537 | -0.1982 | 0.17024 | 0.44181 | 0.09515 | 0.17557 | -0.0052 |
| PKH_090200 | 0.46172 | 0.45682 | 0.22404 | 0.23467 | -0.0695 | -0.2707 | -0.3032 |
| PKH_145050 | 1.00151 | 1.38237 | 1.12106 | 1.09097 | 0.65069 | 0.33835 | 0.17264 |
| PKH_144060 | 0.27707 | 0.57877 | 0.14941 | -0.3148 | -0.2475 | -0.2113 | -0.334  |
| PKH_125320 | -0.3066 | -0.1815 | 0.43379 | 1.02943 | 0.96474 | 0.90936 | 0.69745 |
| PKH_101510 | -0.0761 | -0.1592 | -0.2782 | -0.1703 | -0.1975 | -0.0376 | 0.2728  |
| PKH_101570 | 0.29107 | 0.18928 | -0.0641 | -0.0732 | -0.1269 | -0.06   | -0.1093 |
| PKH_143620 | -0.0306 | -0.2216 | -0.1385 | -0.1193 | -0.1291 | 0.04375 | 0.19402 |
| PKH_093420 | 0.47455 | 0.53624 | 0.34892 | 0.47769 | 0.25253 | 0.2914  | 0.20019 |
| PKH_070690 | 0.15364 | 0.12068 | 0.43907 | 0.11623 | 0.32678 | 0.39102 | 0.46289 |
| PKH_110610 | 0.10511 | 0.14026 | 0.23031 | 0.44126 | 0.07287 | 0.05148 | -0.303  |
| PKH_124120 | 0.27628 | 0.2993  | 0.37231 | 0.08216 | 0.08228 | 0.22052 | 0.51139 |
| PKH_123060 | 0.26467 | 0.40331 | 0.54818 | 0.91249 | 1.04592 | 0.66327 | 0.50572 |
| PKH_072110 | -1.2683 | -1.349  | -1.6133 | -1.8358 | -1.5795 | -1.2906 | -1.382  |
| PKH_021190 | -0.1192 | 0.06867 | 0.12685 | 0.08326 | 0.0617  | -0.0101 | -0.2867 |
| PKH_070940 | 0.16053 | 0.22859 | 0.28865 | 0.51273 | 0.62063 | 0.54421 | 0.60603 |
| PKH_082560 | 0.12954 | 0.1598  | -0.0923 | -0.1988 | -0.3708 | -0.3878 | -0.0306 |
| PKH_070380 | 1.13886 | 0.91989 | 0.71721 | 0.10166 | -0.2581 | 0.07801 | 0.75539 |
| PKH_010690 | 0.2471  | 0.25777 | 0.38172 | 0.28616 | -0.1044 | -0.1798 | -0.4041 |
| PKH_124760 | 0.18502 | 0.37133 | 0.61504 | 0.53217 | 0.47006 | 0.42128 | 0.34483 |
| PKH_070700 | -0.5868 | -0.4544 | -0.4526 | -0.5069 | -0.5371 | -0.3716 | -0.3949 |
| PKH_092040 | -0.4071 | -0.3702 | -0.3422 | -0.2399 | -0.3435 | -0.3797 | -0.6597 |
| PKH_094080 | -0.6816 | -0.7479 | -0.9709 | -0.94   | -0.8638 | -0.8762 | -0.8165 |
| PKH_143170 | 0.00248 | -0.0128 | -0.0091 | 0.3448  | 0.06294 | 0.18042 | -0.1954 |
| PKH_061220 | -0.738  | -0.7352 | -0.7744 | -0.834  | -0.9013 | -1.0185 | -1.5294 |
| PKH_030360 | 0.98663 | 1.1218  | 0.59696 | 0.34007 | -0.1001 | -0.288  | -0.7408 |
| PKH_040350 | -0.6379 | -0.8033 | -0.124  | -0.6863 | -0.7788 | -0.2807 | 0.10698 |
| PKH_131510 | -0.4971 | -0.2047 | 0.10624 | 0.30494 | 0.51615 | 0.23718 | 0.03266 |
| PKH_052010 | 0.40324 | 0.52506 | 0.58435 | 0.63045 | 0.49113 | 0.67073 | 1.0153  |
| PKH_071220 | -0.4139 | -0.4346 | -0.7119 | -0.5539 | -0.4307 | -0.0482 | -0.2432 |

|            |         |         |         |         |         |         |         |
|------------|---------|---------|---------|---------|---------|---------|---------|
| PKH_082410 | 0.14757 | -0.1493 | -0.1137 | -0.196  | -0.002  | -0.4899 | 0.04668 |
| PKH_073270 | -0.3926 | -0.6084 | -0.6835 | -0.8277 | -0.4036 | 0.24952 | 0.45812 |
| PKH_062320 | 0.63545 | 0.47459 | 0.16505 | 0.09458 | 0.10843 | -0.0187 | -0.007  |
| PKH_133260 | 0.34065 | 0.31058 | 0.23714 | -0.0204 | 0.1506  | 0.07167 | 0.15519 |
| PKH_083220 | 0.03404 | 0.23564 | -0.0484 | 0.0982  | -0.1802 | -0.2025 | -0.4019 |
| PKH_052240 | 0.27073 | 0.11323 | -0.102  | -0.156  | 0.32052 | 0.1908  | 0.56915 |
| PKH_111250 | 0.04242 | -0.1603 | -0.1983 | -0.4159 | -0.2338 | -0.2984 | -0.0166 |
| PKH_092350 | -0.5478 | -0.3314 | -0.3268 | -0.1202 | -0.4173 | -0.2995 | -0.3494 |
| PKH_126380 | 0.95775 | 1.08838 | 1.0635  | 1.06937 | 0.86636 | 0.55964 | 0.3342  |
| PKH_010350 | -0.5299 | -0.7188 | -0.6408 | -0.9105 | -0.7562 | -0.6616 | -1.1659 |
| PKH_132240 | 0.01848 | -0.1946 | -0.1679 | -0.2454 | -0.2595 | -0.0898 | -0.0747 |
| PKH_120400 | -0.1237 | -0.0331 | 0.29847 | 0.13002 | -0.0232 | 0.0514  | -1.5783 |
| PKH_140770 | 0.05917 | -0.0242 | 0.14585 | 0.21266 | 0.35546 | 0.27809 | 0.48691 |
| PKH_131920 | 0.04286 | -0.029  | -0.0785 | -0.0572 | -0.1228 | -0.0478 | -0.2906 |
| PKH_052720 | -1.0259 | -1.0992 | -1.2724 | -0.7627 | -1.2501 | -1.2299 | -1.5507 |
| PKH_132740 | 0.21485 | -0.0322 | -0.0315 | -0.0592 | -0.0147 | 0.02424 | 0.30188 |
| PKH_141610 | 0.63196 | 0.80899 | 0.91012 | 0.78981 | 0.76839 | 0.50714 | 0.25111 |
| PKH_091020 | -0.4026 | -1.0405 | -0.8306 | -0.3495 | 0.59728 | 0.81449 | 0.70848 |
| PKH_110270 | 0.03766 | -0.028  | -0.0385 | 0.01217 | 0.07123 | 0.00328 | 0.01819 |
| PKH_080390 | 0.03194 | -0.0814 | -0.2053 | 0.02499 | 0.03396 | -0.1022 | -0.0625 |
| PKH_072950 | 0.14591 | 0.52412 | 0.41422 | 0.67071 | 0.55414 | 0.22214 | 0.33282 |
| PKH_080270 | 0.85503 | 1.07402 | 1.08061 | 1.0929  | 0.33231 | 0.23655 | 0.3657  |
| PKH_146040 | 0.38996 | -0.0151 | 0.10222 | 0.09426 | 0.38951 | 0.69688 | 1.35288 |
| PKH_114150 | 0.13629 | -0.058  | -0.0552 | -0.228  | -0.2292 | -0.3526 | -0.2766 |
| PKH_134290 | 0.33414 | 0.73492 | 0.92821 | 0.71988 | 0.4992  | -0.1266 | -0.5969 |
| PKH_110640 | 0.29957 | 0.09461 | -0.0489 | 0.08125 | 0.09237 | 0.2498  | 0.46675 |
| PKH_102400 | -0.7476 | -1.2123 | -0.7726 | -0.342  | 0.28585 | 0.25193 | 0.07762 |
| PKH_072670 | -0.1052 | -0.2198 | -0.1711 | -0.1982 | -0.2828 | -0.0218 | -0.3815 |
| PKH_132030 | 0.7626  | 0.90526 | 1.05386 | 1.13116 | 1.01949 | 0.67846 | 0.86394 |
| PKH_010050 | -0.3247 | -0.6479 | -1.0044 | -1.4939 | -1.4538 | -1.2079 | -0.9915 |
| PKH_131065 | -0.3521 | -0.3659 | -0.2723 | -0.2274 | -0.1339 | -0.1655 | -0.1842 |
| PKH_146070 | 0.33316 | 0.11192 | -0.1034 | 0.0579  | 0.11968 | 0.2916  | -0.1635 |
| PKH_090890 | -0.192  | -0.2191 | -0.2155 | -0.0375 | -0.1084 | 0.03449 | -1.5076 |
| PKH_122830 | 0.59795 | 0.70023 | 0.72272 | 0.78724 | 0.72084 | 0.65944 | 0.20831 |
| PKH_010540 | -0.8447 | -1.643  | -1.541  | -0.8714 | 0.29792 | 0.3657  | 0.52463 |
| PKH_120570 | -0.1231 | -0.0558 | -0.0119 | -0.0161 | 0.01732 | 0.04136 | 0.20172 |
| PKH_134130 | -0.2354 | -0.0011 | 0.21639 | 0.11522 | -0.0213 | 0.0355  | 0.04341 |
| PKH_114620 | 0.30097 | 0.64571 | 0.518   | 0.39286 | 0.16224 | 0.22532 | 0.17852 |
| PKH_041610 | -0.8722 | -0.4696 | -0.7755 | -0.7368 | -0.4702 | -0.7121 | -0.9145 |
| PKH_052100 | -0.3319 | -0.3072 | -0.304  | -0.392  | -0.3489 | -0.3537 | -0.5311 |
| PKH_061790 | -0.1146 | -0.0378 | -0.1999 | -0.2496 | -0.21   | -0.2995 | -0.2823 |
| PKH_114070 | -0.1699 | -0.2108 | 0.03488 | 0.20645 | -0.1448 | -0.0765 | -0.3622 |
| PKH_141920 | 0.60051 | 0.61461 | 0.75024 | 0.545   | 0.33246 | 0.1318  | -0.2357 |
| PKH_126040 | 0.64058 | 0.59806 | 0.61427 | 0.4193  | 0.30445 | 0.59775 | 0.83382 |
| PKH_073060 | 0.22121 | 0.53578 | 0.28411 | 0.37903 | -0.0016 | 0.02863 | -0.4889 |
| PKH_040340 | 1.13403 | 1.04774 | 1.16354 | 0.94476 | 1.1204  | 1.21096 | 1.41681 |
| PKH_071890 | 0.21636 | 0.54945 | 0.73037 | 0.88473 | 0.79681 | 0.38088 | -0.4039 |
| PKH_080100 | -0.0469 | -0.0892 | -0.086  | -0.4445 | -0.4129 | -0.5858 | -0.5217 |
| PKH_031360 | -0.1961 | -0.0244 | 0.18039 | 0.18947 | 0.12017 | 0.02669 | 0.10932 |
| PKH_021220 | -0.5586 | -0.0392 | 0.26535 | 0.01632 | -0.5747 | -0.8062 | -1.093  |
| PKH_093440 | -0.1411 | -0.1444 | -0.1737 | 0.11225 | 0.04696 | 0.3565  | 0.52611 |
| PKH_140390 | 0.90381 | 1.10241 | 1.08343 | 0.96772 | 0.73195 | 0.41659 | 0.45317 |
| PKH_124790 | 0.24102 | 0.43404 | 0.50591 | 0.50193 | 0.22335 | 0.08493 | -0.1355 |
| PKH_101110 | 0.21718 | -0.0772 | -0.0931 | 0.16133 | 0.19862 | 0.00613 | -0.1379 |
| PKH_122730 | -0.49   | -0.4993 | -0.4061 | -0.1003 | -0.2254 | 0.01185 | -0.0404 |
| PKH_071730 | -0.0399 | 0.16249 | 0.05042 | 0.10581 | -0.0142 | 0.21233 | -0.0562 |
| PKH_010130 | -1.2969 | -0.9481 | -1.0908 | -1.0867 | -1.1712 | -1.1952 | -2.0546 |
| PKH_093320 | 0.43425 | -0.169  | -0.3215 | 0.90147 | 1.54589 | 1.64603 | 1.46086 |
| PKH_120260 | 0.74651 | 0.48296 | 0.43046 | 0.34151 | 0.41058 | 0.49492 | 0.87264 |
| PKH_124920 | 0.55154 | 0.72959 | 0.69918 | 0.83633 | 0.52081 | 0.30586 | 0.47806 |
| PKH_114160 | -0.7347 | -1.0638 | -0.8035 | -0.6085 | 0.21469 | 0.12732 | -0.4174 |
| PKH_081920 | 0.52751 | 0.7808  | 1.0867  | 0.43772 | 0.61701 | 0.43532 | 0.36788 |
| PKH_092220 | 0.59663 | 0.4327  | 0.24002 | -0.2381 | -0.2341 | -0.437  | -0.4213 |

|            |         |         |         |         |         |         |         |
|------------|---------|---------|---------|---------|---------|---------|---------|
| PKH_101670 | -0.9325 | -1.0123 | -0.8778 | -1.0388 | -1.3401 | -1.3621 | -1.6894 |
| PKH_126300 | 0.84194 | 0.89465 | 1.03203 | 0.91374 | 0.60773 | 0.68364 | 0.5983  |
| PKH_082980 | -1.3071 | -1.2749 | -0.7597 | 0.20123 | -0.1018 | 0.18146 | -0.1433 |
| PKH_114060 | 0.13069 | 0.16254 | 0.20295 | 0.23665 | 0.20545 | 0.49923 | 0.43641 |
| PKH_124500 | 0.20943 | 0.38034 | 0.44902 | 0.4967  | 0.59016 | 0.62579 | 0.85147 |
| PKH_102380 | 0.21942 | 0.39736 | 0.84564 | 0.89156 | 1.21528 | 1.28078 | 0.96419 |
| PKH_093120 | 0.5665  | 0.61448 | 0.65588 | 0.31782 | 0.38915 | 0.33269 | -0.4877 |
| PKH_020540 | -0.0258 | 0.25113 | 0.06737 | 0.5404  | 0.14327 | -0.187  | -0.24   |
| PKH_090770 | 1.05032 | 0.91917 | 0.95622 | 0.501   | 0.38028 | 0.08516 | -0.08   |
| PKH_071320 | -0.0326 | 0.04918 | 0.08559 | 0       | 0.06035 | 0.22021 | -0.1002 |
| PKH_112280 | 0.45585 | 0.22163 | 0.07618 | 0.00284 | 0.24088 | 0.29055 | 0.50497 |
| PKH_113810 | -1.5087 | -1.2297 | -0.905  | -0.5338 | -0.4776 | -0.2021 | -0.1879 |
| PKH_100810 | 0.1946  | 0.15137 | 0.2279  | 0.32752 | 0.14307 | -0.1243 | -0.4627 |
| PKH_070520 | -0.9245 | -0.8972 | -0.8143 | -0.88   | -0.75   | -0.412  | -0.5743 |
| PKH_092870 | 0.22286 | 0.24749 | 0.45564 | 0.45393 | 0.4488  | 0.66647 | 0.68596 |
| PKH_130040 | 0.02846 | 0.0498  | -0.1139 | -0.1098 | -0.124  | -0.309  | -0.3595 |
| PKH_124700 | 0.60139 | 0.58069 | 0.57889 | 0.45425 | 0.13498 | 0.14664 | 0.04214 |
| PKH_144220 | 0.57977 | 0.58145 | 0.57618 | 0.45172 | 0.40865 | 0.34033 | 0.86089 |
| PKH_130830 | -0.4472 | -0.5101 | -0.11   | 0.36786 | 0.86242 | 0.78243 | 0.41956 |
| PKH_083580 | 1.03461 | 1.08065 | 0.93849 | 0.86483 | 0.55874 | 0.23692 | 0.607   |
| PKH_051430 | -1.2435 | -1.6915 | -1.8714 | -1.2233 | -0.3782 | 0.37383 | 0.24455 |
| PKH_031970 | -0.2855 | -0.6203 | -1.0183 | -1.3406 | -1.3383 | -0.798  | -0.0355 |
| PKH_073260 | -0.3615 | -0.0212 | -0.0506 | 0.20244 | -0.0678 | -0.2501 | -0.3891 |
| PKH_031380 | 0.67279 | 0.58142 | 0.53818 | 0.19731 | 0.20405 | -0.2172 | -0.5164 |
| PKH_072480 | 0.73057 | 1.03327 | 1.27573 | 1.00674 | 0.72471 | 0.28214 | 0.15191 |
| PKH_052830 | 0.50686 | 0.44918 | 0.52208 | 0.55714 | 0.45604 | 0.29264 | -1.0553 |
| PKH_090630 | -0.6912 | -0.7452 | -0.6443 | -0.0978 | -0.0039 | -0.4911 | -1.5282 |
| PKH_071710 | -1.1873 | -1.306  | -0.948  | -0.5008 | -0.0178 | 0.37847 | -0.259  |
| PKH_070270 | -0.1324 | -0.6948 | -0.0041 | 1.2486  | 1.38903 | 1.76236 | 1.84187 |
| PKH_040750 | 0.24686 | 0.30947 | 0.39593 | 0.66254 | 0.38565 | 0.00305 | -0.1755 |
| PKH_125880 | 0.38483 | 0.55952 | 0.52726 | 0.36879 | 0.47833 | 0.64917 | 0.79558 |
| PKH_124730 | 0.26085 | 0.35835 | 0.31965 | 0.1082  | 0.03651 | -0.049  | -0.3244 |
| PKH_121990 | 0.37716 | 0.67367 | 0.47058 | 0.4345  | 0.29193 | 0.03926 | 0.22463 |
| PKH_145800 | 0.60697 | 0.57189 | 0.52988 | 0.45352 | 0.53077 | 0.30528 | -0.7912 |
| PKH_051200 | -0.2041 | -0.1463 | -0.2461 | -0.0796 | -0.245  | -0.1598 | -1.1893 |
| PKH_082310 | 0.6241  | 0.3987  | 0.5267  | 0.41826 | 0.48579 | 0.38773 | -0.1903 |
| PKH_126630 | -1.4081 | -1.3258 | -0.8956 | -0.7055 | -0.2574 | -0.2241 | -0.6724 |
| PKH_111470 | -0.6039 | -0.656  | -0.2046 | 0.10658 | 0.37696 | 0.81321 | 0.85313 |
| PKH_124620 | -1.0085 | -1.5218 | -1.2735 | -0.7256 | -0.0549 | 0.71029 | 0.93573 |
| PKH_010320 | -1.91   | -1.9324 | -1.9711 | -2.1232 | -2.0127 | -2.2693 | -2.4526 |
| PKH_121680 | 0.09831 | 0.02517 | 0.1549  | 0.34867 | 0.03598 | 0.09814 | 0.22707 |
| PKH_101830 | -0.1815 | -0.2704 | -0.1609 | -0.3622 | -0.4874 | -0.2414 | -0.2414 |
| PKH_091230 | -0.1896 | -0.4328 | -0.4883 | -0.4078 | 0.12011 | 0.43633 | 0.46984 |
| PKH_133310 | -0.0486 | -0.0732 | -0.1383 | -0.0118 | -0.2177 | -0.036  | -1.1866 |
| PKH_041140 | 0.38038 | 0.47675 | 0.37941 | 0.07882 | 0.05333 | 0.11353 | 0.52164 |
| PKH_020290 | -0.0055 | 0.71716 | 0.40968 | 0.28823 | 0.03689 | -0.3839 | -0.8312 |
| PKH_143300 | -0.6023 | -0.458  | -0.5379 | -0.5269 | -0.0844 | 0.11287 | -0.117  |
| PKH_142840 | -0.1981 | -0.0008 | 0       | -0.3921 | -0.2906 | -0.4542 | -0.3963 |
| PKH_120140 | -0.2881 | -0.2084 | -0.1295 | -0.0769 | -0.2169 | -0.4312 | -1.4994 |
| PKH_060170 | 0.55879 | 0.60955 | 0.67952 | 0.7346  | 0.44233 | 0.15625 | -0.2143 |
| PKH_070910 | 0.01824 | -0.0026 | 0.00176 | -0.0443 | 0.12492 | 0.02529 | -1.0148 |
| PKH_072960 | -0.3168 | -0.4952 | -0.6016 | -0.3677 | -0.1294 | -0.0532 | -0.0644 |
| PKH_125940 | -0.6779 | -0.8911 | -1.3933 | -1.7312 | -1.3174 | -1.4153 | -1.2157 |
| PKH_092860 | -0.1048 | -0.2413 | -0.3119 | -0.3847 | -0.2922 | -0.2838 | -0.5027 |
| PKH_130010 | 0.90755 | 0.82582 | 0.87745 | 0.60257 | 0.28344 | 0.23155 | 0.43378 |
| PKH_124570 | 0.99705 | 1.20875 | 1.1492  | 0.95601 | 0.3434  | 0.13937 | 0.03161 |
| PKH_133120 | 0.59075 | 0.65015 | 0.73424 | 0.22329 | 0.18878 | -0.0232 | 0.51738 |
| PKH_110480 | 0.48429 | 0.45519 | 0.01041 | 0.23472 | -0.1161 | -0.3676 | -0.1461 |
| PKH_061580 | 0.40332 | 0.18756 | 0.02225 | -0.0873 | -0.051  | -0.1217 | -0.1168 |
| PKH_100270 | 0.26906 | 0.26514 | 0.34423 | 0.21639 | 0.09372 | 0.07023 | -0.9893 |
| PKH_092400 | -0.4953 | -0.4497 | -0.3509 | -0.5524 | -0.543  | -0.6507 | -0.6054 |
| PKH_125020 | 0.73857 | 0.79859 | 1.06413 | 1.22647 | 0.99474 | 0.93535 | 0.97812 |
| PKH_021130 | 0.13014 | 0.26706 | -0.0616 | -0.7819 | -0.8108 | -1.3732 | -1.6881 |

|            |         |         |         |         |         |         |         |
|------------|---------|---------|---------|---------|---------|---------|---------|
| PKH_123540 | 0.37773 | 0.80706 | 0.51577 | 0.89301 | 0.57513 | 0.28005 | 0.03949 |
| PKH_080820 | 0.48803 | 0.34529 | -0.0161 | -0.2051 | 0.00683 | 0.2418  | 0.83744 |
| PKH_081210 | 0.56719 | 0.54309 | 0.43356 | 0.34433 | 0.07651 | -0.1463 | -0.021  |
| PKH_110410 | 0.3679  | 0.90324 | 0.83693 | 1.12364 | 0.99353 | 0.79527 | 0.58143 |
| PKH_011430 | -0.2145 | -0.2601 | -0.4971 | -0.4871 | -0.6403 | -0.1536 | 0.22131 |
| PKH_050050 | 0.34085 | 0.43563 | 0.0417  | -0.1187 | 0.07072 | 0.52144 | 0.72523 |
| PKH_125150 | 0.03866 | -0.1416 | 0.20753 | 0.09462 | -0.0583 | -0.1504 | -1.2553 |
| PKH_081350 | -1.0033 | -0.9518 | -0.9116 | -0.682  | -0.3662 | -0.6124 | -1.1493 |
| PKH_090230 | -0.0429 | 0.19921 | 0.77999 | 0.39864 | 0.5742  | 0.68458 | 0.90251 |
| PKH_145920 | 0.23548 | 0.05891 | 0.03286 | 0.01845 | 0.00763 | 0.05187 | 0.37307 |
| PKH_072830 | -0.5811 | -0.2898 | -0.3089 | -0.1613 | -0.2663 | -0.5048 | -0.8989 |
| PKH_080940 | 1.26532 | 1.18547 | 1.20221 | 0.81128 | 0.73303 | 0.32023 | 0.0858  |
| PKH_143710 | 0.18048 | 0.11185 | 0.1464  | 0.07897 | 0.04902 | -0.0842 | 0.04327 |
| PKH_114730 | -0.6895 | -0.8968 | -1.2159 | -0.8954 | -0.7886 | -0.6654 | -0.9443 |
| PKH_122910 | 0.09041 | 0.02821 | 0.07361 | 0.01013 | -0.0782 | 0.04133 | 0.06919 |
| PKH_101550 | 0.49495 | 0.45553 | 0.45547 | 0.16781 | 0.24079 | 0.17739 | 0.39002 |
| PKH_144080 | -0.8905 | -1.0935 | -0.5507 | -0.8113 | -0.0746 | -0.0462 | -0.0374 |
| PKH_082580 | 0.00653 | 0.32599 | 0.06026 | 0.32674 | 0.07211 | 0.0654  | -0.336  |
| PKH_030910 | -0.7276 | -0.8345 | -0.8632 | -0.9284 | -0.8639 | -1.0506 | -0.9464 |
| PKH_123330 | 0.41464 | 0.43927 | 0.43716 | 0.49935 | 0.23515 | 0.07486 | 0.2779  |
| PKH_120350 | 0.05164 | -0.1094 | -0.0614 | -0.0686 | -0.1496 | -0.0408 | -0.0183 |
| PKH_110050 | 0.5027  | 0.11437 | -0.2201 | -0.2854 | -0.3727 | 0.25639 | 0.8902  |
| PKH_020550 | -0.3859 | -0.3835 | -0.5192 | -0.6417 | -0.4522 | -0.4851 | -1.0969 |
| PKH_146250 | -0.0551 | 0.02506 | 0.50159 | 1.11115 | 0.68961 | 0.4262  | 0.48804 |
| PKH_052330 | -0.5994 | -0.629  | -0.5997 | -0.6517 | -0.7971 | -0.9134 | -1.572  |
| PKH_125900 | 0.5141  | 1.01197 | 0.59962 | 0.67463 | 0.54419 | 0.37733 | -1.3858 |
| PKH_140160 | 0.11157 | 0.36229 | 0.50346 | 0.25822 | 0.15213 | 0.16716 | 0.24213 |
| PKH_010680 | -0.0421 | 0.44698 | 0.64575 | 0.73333 | 0.83111 | 0.48233 | 0.15959 |
| PKH_140370 | 0.75201 | 1.02211 | 1.15364 | 1.06954 | 0.90117 | 0.84231 | 0.78436 |
| PKH_121630 | 0.49058 | 0.59123 | 0.61518 | 0.4353  | 0.39543 | 0.23753 | 0.21924 |
| PKH_146840 | -0.1166 | 0.53557 | 0.69035 | 0.64242 | 0.48146 | 0.03682 | -0.4385 |
| PKH_081610 | 0.02844 | 0.08175 | -0.2484 | -0.7865 | -0.9297 | -1.2031 | -1.6827 |
| PKH_143470 | 0.18244 | 0.01088 | -0.0892 | -0.0331 | -0.0588 | -0.2462 | -1.1061 |
| PKH_113110 | 0.95466 | 0.79116 | 0.78778 | 0.62405 | 0.69555 | 0.4839  | 0.96986 |
| PKH_092840 | 0.64028 | 0.63382 | 0.52562 | 0.51556 | 0.37812 | 0.30117 | 0.34101 |
| PKH_061480 | -0.1575 | 0.56139 | 0.73293 | 0.89691 | -0.1164 | -0.3291 | -0.5938 |
| PKH_060100 | -0.3792 | -0.4164 | -0.546  | -0.3967 | -0.4391 | -0.5031 | -0.5217 |
| PKH_113370 | 0.12086 | -0.0149 | 0.40223 | 0.54151 | 0.46006 | -0.0016 | 0.64039 |
| PKH_082870 | -0.2638 | -0.0165 | 0.14722 | 0.38174 | 0.57923 | 0.63691 | 0.02678 |
| PKH_143450 | 0.0613  | -0.1602 | -0.193  | -0.4037 | -0.0575 | 0.28837 | 0.65039 |
| PKH_112390 | 0.18635 | 0.09797 | -0.1479 | -0.2168 | 0.43122 | 0.92614 | 0.9726  |
| PKH_083030 | 0.6447  | 0.73767 | 0.93365 | 0.72504 | 0.73839 | 0.76629 | 0.91269 |
| PKH_114250 | -0.5986 | -0.8628 | -0.8498 | -0.7515 | -0.7824 | -0.5849 | -0.8443 |
| PKH_112420 | 0.21254 | -0.0829 | -0.3075 | -0.4449 | -0.4671 | -0.402  | 0.17191 |
| PKH_083360 | -0.0772 | 0.06597 | 0.09718 | 0.02055 | 0.17319 | -0.1162 | -0.6091 |
| PKH_071830 | -0.2845 | -0.108  | -0.2563 | -0.4715 | -0.2641 | -0.3158 | -0.3947 |
| PKH_091210 | 0.40656 | 0.5318  | 0.29108 | 0.45576 | 0.53568 | 0.18693 | 0.03857 |
| PKH_061090 | 0.02052 | 0.21287 | 0.21454 | 0.20514 | 0.18702 | -0.0663 | -0.0438 |
| PKH_146450 | 0.42628 | 0.57302 | 0.49929 | 0.45708 | 0.18655 | 0.11708 | 0.09286 |
| PKH_134510 | -0.1145 | -0.0751 | 0.18515 | 0.11718 | 0.18636 | 0.29238 | -1.0268 |
| PKH_091730 | -0.2121 | -0.3709 | -0.6454 | -0.4509 | -0.3391 | -0.1656 | -0.3441 |
| PKH_102420 | -0.2911 | -0.3231 | -0.0033 | -0.1508 | -0.581  | -0.5989 | -0.5416 |
| PKH_071150 | 0.18072 | 0.22543 | 0.32371 | 0.13249 | 0.15364 | 0.10979 | 0.73929 |
| PKH_103160 | -0.1722 | 0.14948 | 0.30851 | 0.72405 | 0.45767 | 0.27727 | 0.29078 |
| PKH_114050 | 1.10888 | 1.0197  | 1.07182 | 1.10871 | 0.75336 | 0.40025 | 0.19657 |
| PKH_145760 | 1.37842 | 1.39135 | 1.45932 | 1.52852 | 0.79657 | 0.40247 | 0.43048 |
| PKH_072750 | 0.27021 | 0.44546 | 0.44641 | 0.31305 | 0.09362 | -0.2501 | -0.4193 |
| PKH_050910 | 0.5411  | 0.72496 | 0.9035  | 0.95249 | 0.77822 | 0.51491 | 0.34865 |
| PKH_120490 | 0.04632 | -0.0826 | 0.0129  | 0.20911 | 0.08337 | 0.01765 | 0.1393  |
| PKH_120310 | 0.51417 | 0.83846 | 1.01665 | 0.99146 | 0.60927 | 0.04023 | -0.1748 |
| PKH_094100 | 0.15593 | 0.14107 | 0.48423 | 0.53435 | 0.62016 | 0.39772 | 0.45365 |
| PKH_101500 | -0.6131 | -0.4813 | -0.7141 | -0.1109 | 0.35674 | 0.30054 | -0.9775 |
| PKH_110820 | -0.5816 | -0.4819 | -0.5303 | -0.5315 | -0.6419 | -0.7143 | -0.8126 |

|            |         |         |         |         |         |         |         |
|------------|---------|---------|---------|---------|---------|---------|---------|
| PKH_051490 | 0.13295 | 0.19933 | 0.00781 | 0.11444 | 0.00562 | -0.0022 | -1.3256 |
| PKH_080310 | -0.1077 | 0.09984 | -0.1939 | -0.2007 | -0.2112 | -0.4819 | -0.7667 |
| PKH_072740 | -1.0097 | -1.1401 | -1.0665 | -1.1556 | -1.202  | -1.1877 | -1.4539 |
| PKH_133710 | 0.98144 | 0.95469 | 1.17674 | 0.71103 | 0.87616 | 0.42305 | 0.27025 |
| PKH_071670 | 0.72803 | 0.68758 | 0.81427 | 0.85337 | 0.8143  | 0.30137 | 0.3391  |
| PKH_072050 | 0.20276 | 0.18878 | 0.07476 | 0.07132 | 0.00797 | -0.0785 | 0.00064 |
| PKH_124150 | 0.88247 | 0.92751 | 1.01354 | 0.79009 | 0.49693 | 0.31956 | 0.15615 |
| PKH_071860 | -0.2703 | 0.36442 | 0.00636 | 0.20235 | 0.14582 | -0.1897 | -0.3995 |
| PKH_051985 | 0.49661 | 0.7251  | 0.43474 | 0.26416 | -0.2512 | -0.5398 | -0.4834 |
| PKH_110590 | 0.04731 | 0.00049 | -0.2169 | -0.3819 | -0.4877 | -0.4017 | -0.26   |
| PKH_094330 | -0.3737 | -0.253  | 0.02971 | 0.31381 | 0.51463 | 0.27597 | 0.12779 |
| PKH_140240 | -0.1493 | -0.0994 | 0.01168 | 0.125   | -0.0244 | 0.06737 | -1.2557 |
| PKH_142450 | -0.7417 | -0.746  | -0.8797 | -1.6674 | -1.3661 | -1.6399 | -1.7301 |
| PKH_011450 | -0.6438 | -0.4288 | -0.5623 | -0.3251 | -0.4355 | -0.3894 | -0.7464 |
| PKH_031740 | -0.0144 | -0.3057 | -0.2263 | -0.6042 | -0.624  | -0.0706 | 0.30802 |
| PKH_131350 | 0.55491 | 0.61982 | 0.5387  | 0.51313 | 0.30725 | 0.06432 | 0.04341 |
| PKH_124690 | -0.4355 | -0.3197 | -0.4482 | -0.4858 | -0.5657 | -0.6321 | -0.7978 |
| PKH_110580 | 0.54064 | 0.72982 | 0.6995  | 1.0786  | 0.6621  | 0.47905 | 0.31377 |
| PKH_060900 | -0.1075 | -0.4089 | -0.6025 | -0.768  | -0.6202 | -0.4858 | -0.2352 |
| PKH_082400 | -0.0407 | -0.1182 | 0.3174  | 0.73645 | 0.63698 | 0.52008 | 0.58679 |
| PKH_145880 | -0.1309 | -0.0321 | 0.24191 | 0.12446 | 0.05136 | 0.02132 | -1.2796 |
| PKH_020980 | -0.5682 | -0.4453 | -0.34   | -0.292  | -0.4151 | -0.2898 | -0.9203 |
| PKH_141240 | 0.46586 | 0.34224 | 0.34544 | 0.33642 | 0.19641 | 0.19433 | 0.02597 |
| PKH_094220 | -0.0958 | 0.01665 | 0.19153 | 0.29601 | 0.13183 | 0.3562  | 0.36113 |
| PKH_041080 | 0.18744 | 0.1399  | 0.02348 | -0.1686 | -0.0626 | -0.1449 | -0.1503 |
| PKH_091630 | -0.0038 | 0.06906 | 0.02985 | 0.19854 | 0.18533 | 0.23418 | -0.5261 |
| PKH_030660 | 0.05729 | 0.18308 | 0.27383 | 0.02225 | 0.44702 | 0.14304 | 0.08034 |
| PKH_041460 | -0.2043 | -0.2523 | -0.1277 | 0.0227  | -0.5974 | -0.3154 | -1.431  |
| PKH_092180 | -0.1511 | 0.15609 | -0.1187 | -0.2341 | -0.056  | -0.1656 | -0.3255 |
| PKH_102990 | 0.22352 | 0.00833 | -0.3526 | -0.4187 | -0.4709 | -0.3484 | -0.0817 |
| PKH_020740 | -1.2214 | -1.0659 | -0.8082 | -0.4614 | -0.1363 | 0.18467 | -0.5482 |
| PKH_082600 | -0.2726 | -0.4801 | -0.5328 | -0.8909 | -0.4254 | -0.0546 | 0.07766 |
| PKH_121610 | 0.19145 | -0.0769 | 0.02188 | 0.39627 | 0.8189  | 0.50151 | 1.03748 |
| PKH_110390 | 0.77292 | 1.15158 | 0.97212 | 0.82149 | 0.37359 | 0.23    | 0.71013 |
| PKH_110520 | 0.30865 | 0.17598 | 0.15436 | 0.18529 | 0.07666 | -0.1026 | -1.5252 |
| PKH_112600 | -0.7919 | -0.3228 | -0.1138 | -0.0049 | -0.3567 | -0.3012 | -0.321  |
| PKH_113600 | 0.19195 | -0.0025 | 0.01727 | -0.0689 | -0.7294 | -0.3984 | 0.33768 |
| PKH_072190 | 0.81921 | 0.80546 | 0.68244 | 0.55009 | 0.16271 | 0.08661 | 0.20001 |
| PKH_112850 | 0.1099  | 0.21207 | 0.50814 | 0.89369 | 0.64885 | 0.45368 | 0.09141 |
| PKH_060820 | 0.14064 | 0.21903 | 0.12934 | 0.24401 | 0.25704 | -0.2564 | -0.1083 |
| PKH_010510 | -1.7367 | -1.5193 | -1.3864 | -1.7444 | -1.4748 | -1.6463 | -2.2578 |
| PKH_081790 | 0.24842 | -0.3537 | -0.0475 | -0.3983 | -0.3193 | 0.01244 | 0.46679 |
| PKH_102880 | 0.28752 | 0.06405 | 0.52326 | 0.72714 | 0.42216 | 0.53158 | 0.40531 |
| PKH_132530 | 0.83579 | 0.74268 | 0.67033 | 0.55515 | 0.59939 | 0.17001 | 0.36529 |
| PKH_021100 | -0.2021 | 0.39125 | 0.9161  | 1.01144 | 1.0273  | 0.90435 | 0.51627 |
| PKH_141190 | 0.0035  | -0.2764 | 0.1203  | 0.18545 | 0.69183 | 1.03431 | 0.78773 |
| PKH_141420 | 0.2461  | 0.22011 | 0.41504 | 0.44038 | 0.39019 | 0.80616 | 1.09358 |
| PKH_122290 | -0.1107 | -0.1906 | -0.261  | -0.4314 | -0.2352 | -0.1953 | -0.1763 |
| PKH_102210 | 0.48199 | 0.40368 | -0.0849 | 0.08705 | -0.0941 | -0.1699 | -0.5137 |
| PKH_114310 | 0.90378 | 0.91797 | 0.71024 | 0.58873 | 0.42288 | 0.38265 | 0.63385 |
| PKH_131800 | -0.0052 | 0.09049 | 0.05721 | 0.13832 | 0.00296 | 0.06336 | -0.0117 |
| PKH_123360 | 0.16838 | 0.09349 | 0.07302 | 0.15028 | 0.2916  | 0.01952 | -0.0548 |
| PKH_124400 | 0.10793 | 0.47971 | 0.42647 | 0.54994 | 0.15629 | 0.19329 | 0.02632 |
| PKH_041220 | -0.3725 | -0.3798 | -0.2351 | 0.02352 | -0.0923 | 0.19526 | -0.2184 |
| PKH_060390 | -1.5846 | -1.5832 | -1.5972 | -1.6021 | -1.2909 | -1.1213 | -1.2053 |
| PKH_080810 | -0.0378 | 0.01148 | -0.3628 | -0.2131 | -0.7512 | -0.698  | -0.8653 |
| PKH_072650 | 0.06128 | 0.14519 | -0.0102 | -0.1529 | -0.2627 | -0.3842 | -0.3805 |
| PKH_090510 | -0.0985 | -0.5801 | -0.6876 | -0.5417 | 0.19866 | 0.837   | 0.59799 |
| PKH_142550 | -0.3331 | -0.5986 | -0.6276 | -0.9307 | -0.6241 | -0.0969 | 0.50386 |
| PKH_123770 | 0.93733 | 0.75229 | 0.84946 | 0.91802 | 0.5016  | 0.68674 | 0.60063 |
| PKH_081540 | -1.2547 | -1.2709 | -0.9279 | -0.7168 | -0.4891 | -0.3245 | -0.2717 |
| PKH_000690 | 0.84338 | 0.53447 | 0.9021  | 0.86596 | 0.48484 | 0.60269 | 0.70759 |
| PKH_113540 | -0.3674 | -0.5137 | -0.4681 | -0.3578 | -0.3465 | -0.0399 | -0.0777 |



|            |         |         |         |         |         |         |         |
|------------|---------|---------|---------|---------|---------|---------|---------|
| PKH_132090 | -0.1163 | -0.1839 | -0.1603 | -0.2761 | -0.2652 | -0.4139 | -0.2295 |
| PKH_101460 | -0.7902 | -0.9858 | -0.8411 | -0.5701 | -0.4691 | -0.7532 | -1.4848 |
| PKH_120640 | 0.77557 | 0.60187 | 0.64357 | 0.41755 | 0.37024 | 0.12102 | 0.42492 |
| PKH_112060 | 0.28175 | 0.49841 | 0.27019 | 0.34538 | 0.35348 | 0.05814 | -1.5871 |
| PKH_133620 | 0.67943 | 0.80555 | 0.83011 | 0.56944 | 0.56474 | 0.44598 | 0.43761 |
| PKH_126840 | 0.4254  | 0.70014 | 0.5218  | 0.45499 | 0.21521 | 0.10494 | 0.02529 |
| PKH_112750 | 0.41329 | 0.63733 | 0.84053 | 1.26478 | 0.95191 | 0.90196 | 0.66769 |
| PKH_130200 | 0.86108 | 0.82951 | 0.89827 | 0.61985 | 0.94771 | 0.61932 | 0.77825 |
| PKH_123180 | -0.1929 | -0.3989 | -0.4462 | -0.6844 | -0.4874 | -0.3905 | -1.3473 |
| PKH_114440 | -0.7214 | -0.6423 | -0.5115 | -0.4616 | -0.3493 | -0.3459 | -0.6604 |
| PKH_126770 | 0.45147 | 0.68152 | 0.66284 | 0.61564 | 0.52384 | 0.43919 | -0.934  |
| PKH_145200 | 0.44745 | 0.6518  | 0.61162 | 0.61134 | 0.49757 | 0.42288 | 0.42736 |
| PKH_100250 | -0.2809 | -0.5326 | -0.0495 | -0.0852 | -0.0364 | 0.12496 | 0.17438 |
| PKH_122350 | 0.27535 | 0.02925 | 0.03474 | -0.1304 | -0.1927 | -0.1122 | -0.6879 |
| PKH_133170 | -0.0502 | 0.01261 | 0.09022 | 0.0194  | -0.0707 | -0.0542 | -0.1557 |
| PKH_110660 | 0.42013 | 0.4901  | 0.73636 | 0.42897 | 0.36239 | 0.43148 | 0.47115 |
| PKH_030150 | 0.51455 | 0.66643 | 0.92235 | 0.50706 | 0.6239  | 0.81717 | 0.80649 |
| PKH_120530 | -0.9017 | -1.0137 | -0.9911 | -0.3227 | 0.3877  | 0.52778 | 0.60347 |
| PKH_091600 | 0.32612 | 0.16937 | 0.13967 | 0.26574 | 0.06197 | 0.24303 | 0.37734 |
| PKH_145570 | 0.3111  | 0.19666 | -0.1694 | -0.2902 | -0.3648 | -0.1118 | 0.58182 |
| PKH_130690 | -0.6131 | -0.5641 | -0.5094 | -0.3799 | -0.6396 | -0.5019 | -0.2569 |
| PKH_052220 | 0.71649 | 0.46908 | 0.29169 | 0.3782  | 0.48083 | 0.65506 | 0.47265 |
| PKH_020350 | -1.1673 | -1.0146 | -1.0463 | -1.4463 | -1.3165 | -1.5417 | -1.8798 |
| PKH_130650 | 0.32885 | 0.38659 | 0.22168 | 0.07012 | 0.07805 | 0.02473 | 0.01843 |
| PKH_050260 | 0.40466 | 0.66492 | 0.56726 | 0.56332 | 0.62083 | 0.61007 | 0.29314 |
| PKH_143120 | 0.41146 | 0.39301 | 0.25678 | -0.0073 | 0.12503 | -0.0595 | -0.073  |
| PKH_130120 | -0.0366 | -0.0566 | -0.3076 | -0.4321 | -0.4738 | -0.1949 | -0.1518 |
| PKH_121750 | 0.13012 | 0.41868 | 0.21345 | 0.7547  | 0.50372 | 0.16789 | -0.1962 |
| PKH_112230 | 0.63116 | 1.22976 | 1.37903 | 1.41096 | 0.93021 | 0.48295 | 0.0814  |
| PKH_072430 | 0.11148 | -0.161  | -0.282  | -0.1385 | -0.3311 | -0.631  | -0.7309 |
| PKH_080260 | 0.17719 | 0.19606 | 0.25912 | 0.26157 | 0.03628 | 0.12565 | -0.029  |
| PKH_111280 | 0.23361 | 0.17979 | 0.24837 | 0.22603 | 0.08057 | 0.27166 | 0.14185 |
| PKH_140900 | 0.31736 | 0.35781 | 0.18424 | 0.202   | 0.29908 | 0.16924 | 0.19648 |
| PKH_070770 | 0.5404  | 0.57091 | 0.50059 | 0.57821 | 0.44066 | 0.6117  | 0.75592 |
| PKH_052510 | 0.0277  | 0.02455 | 0.20302 | -0.0005 | 0.13163 | 0.19423 | 0.10594 |
| PKH_100440 | -0.8136 | -0.5419 | -0.1939 | -0.1273 | 0.19635 | 0.63702 | 0.84665 |
| PKH_010910 | -0.8954 | -0.7159 | -0.8357 | -0.9802 | -0.9547 | -0.9149 | -1.6554 |
| PKH_121780 | -0.6954 | -0.592  | -0.6659 | -0.6996 | -0.6194 | -0.7668 | -1.3304 |
| PKH_134530 | 0.45758 | 0.43102 | 0.11861 | 0.06764 | 0.18076 | 0.1309  | 0.40113 |
| PKH_000390 | -0.4508 | -0.3999 | -0.4829 | -0.358  | -0.6052 | -0.6067 | -1.0797 |
| PKH_100730 | 0.09419 | 0.18303 | 0.25849 | 0.46056 | 0.37623 | 0.32408 | 0.02134 |
| PKH_133240 | 0.49676 | 0.664   | 0.72061 | 0.40041 | 0.15263 | -0.312  | -0.1867 |
| PKH_094520 | 0.70355 | 0.68026 | 1.08153 | 0.99969 | 0.98564 | 0.84214 | 0.84562 |
| PKH_145130 | -0.5899 | -0.6587 | -0.3908 | -0.0169 | 0.44007 | 0.65352 | 0.30279 |
| PKH_081770 | 0.1026  | -0.0081 | -0.0874 | 0.08122 | -0.0108 | 0.09331 | -1.3659 |
| PKH_100160 | 0.00053 | 0.24355 | 0.0046  | 0.18515 | 0.00569 | 0.07694 | -1.3852 |
| PKH_060330 | -1.0833 | -1.0449 | -0.9073 | -0.9514 | -0.976  | -0.983  | -0.7766 |
| PKH_080540 | 0.13487 | 0.15451 | -0.0702 | -0.1015 | -0.2724 | -0.3618 | -0.2893 |
| PKH_082910 | 0.77748 | 0.90466 | 0.80843 | 0.69386 | 0.67397 | 0.87144 | 1.12826 |
| PKH_141150 | 0.44032 | 0.60542 | 0.51218 | 0.56414 | 0.38613 | 0.24803 | -0.044  |
| PKH_112550 | 0.20903 | -0.1974 | 0.08235 | -0.1337 | -0.5004 | -0.6496 | -0.3484 |
| PKH_070500 | 0.29116 | 0.54011 | 0.91086 | 1.38349 | 0.98622 | 0.70102 | 0.49893 |
| PKH_100780 | -0.0085 | -0.0962 | -0.1247 | -0.225  | -0.4939 | -0.4636 | -0.1865 |
| PKH_093200 | 0.01166 | 0.15776 | 0.03497 | 0.28287 | 0.10289 | 0.17188 | 0.0439  |
| PKH_073190 | -0.4626 | 0.00278 | -0.2557 | -0.2346 | -0.1807 | -0.2326 | -0.4532 |
| PKH_093400 | 0.09315 | 0.03802 | 0.07274 | 0.00678 | 0.13621 | 0.02682 | 0.0627  |
| PKH_102320 | -0.4654 | -0.3817 | -0.4093 | -0.232  | -0.4147 | -0.3869 | -1.6933 |
| PKH_131290 | 0       | -0.3945 | -0.8583 | -1.4589 | -1.1303 | -0.2955 | 0.61237 |
| PKH_090060 | -0.1799 | -0.186  | -0.2434 | 0.02474 | -0.1331 | 0.14442 | -1.3126 |
| PKH_093760 | 0.52281 | 0.42843 | 0.72422 | 0.28378 | 0.50525 | 0.62702 | 0.73508 |
| PKH_142690 | 0.05015 | -0.1302 | -0.1147 | -0.0833 | 0.2004  | -0.7703 | 0.18099 |
| PKH_141490 | -0.0904 | 0.31297 | 0.63343 | 0.94809 | 0.63147 | 0.33691 | 0.24365 |
| PKH_112740 | -0.1828 | -0.3219 | -0.3268 | -0.3022 | 0.05828 | -0.0992 | -0.3632 |

|            |         |         |         |         |         |         |         |
|------------|---------|---------|---------|---------|---------|---------|---------|
| PKH_120990 | 0.42751 | 0.80343 | 0.64989 | 0.58431 | 0.60839 | 0.39017 | 0.32021 |
| PKH_021260 | -0.3077 | -0.084  | 0.01079 | 0.37533 | 0.46056 | 0.45535 | 0.07519 |
| PKH_100880 | -0.1496 | -0.2929 | -0.302  | -0.4204 | -0.2768 | -0.0795 | 0.12751 |
| PKH_091450 | -0.3203 | 0.2707  | 0.9462  | 1.05049 | 0.62379 | 0.36388 | 0.38791 |
| PKH_010250 | -0.6549 | -0.6779 | -0.0416 | 0.2835  | 0.50157 | 0.27669 | -0.0966 |
| PKH_090120 | 0.20463 | 0.1506  | 0.13352 | 0.22755 | 0.27355 | 0.13437 | -1.2916 |
| PKH_071530 | -0.8682 | -1.2352 | -0.5521 | 0.3491  | 0.95678 | 1.14582 | 0.77567 |
| PKH_142810 | 0.85204 | 1.19566 | 1.17673 | 1.73376 | 0.83259 | 0.58469 | 0.64742 |
| PKH_094430 | 0.69701 | 0.60349 | 0.82843 | 1.11377 | 1.05838 | 1.03012 | 1.05431 |
| PKH_100870 | 0.37498 | 0.29091 | 0.68387 | 0.9253  | 0.91514 | 0.85012 | 1.06889 |

*P. berghei* (ANKA)

| geneid        | TP01    | TP02    | TP03    | TP04    | TP05    | TP06    | TP07    | TP08    | TP09    | TP10    | TP11    | TP12    |
|---------------|---------|---------|---------|---------|---------|---------|---------|---------|---------|---------|---------|---------|
| PBANKA_094260 | 0.3715  | 0.5965  | 0.049   | -0.1407 | 0.1338  | -0.3    | -0.0773 | -0.0777 | -0.252  | -0.2792 | -0.3642 | -0.4544 |
| PBANKA_136090 | -0.4499 | -0.4504 | -0.5386 | -0.6627 | -0.2109 | -0.3175 | 0.4812  | 0.5309  | 0.2473  | 0.4447  | -0.2329 | -0.046  |
| PBANKA_134170 | 0.1486  | -0.9775 | 0.373   | -0.1317 | 0.1766  | 0.7221  | 0.0973  | 0.1863  | 0.1314  | -0.0482 | -0.3365 | -0.3694 |
| PBANKA_140200 | 0.2176  | 0.0651  | -0.2132 | -0.9039 | -0.1911 | -0.143  | -0.3952 | -0.1599 | -0.0662 | 0.1251  | -0.3151 | -0.6373 |
| PBANKA_090940 | -0.2373 | -0.079  | -0.2956 | -0.3306 | -0.0689 | 0.0446  | 0.2755  | 0.4494  | 0.4474  | 0.2739  | 0.0421  | 0.776   |
| PBANKA_090860 | -0.3707 | -0.0547 | -0.5112 | -0.1111 | -0.0255 | 0.0495  | 0.5297  | 0.4843  | 0.5385  | 0.5971  | 0.2109  | 0.4896  |
| PBANKA_052030 | 0.1378  | 0.4317  | 0.0913  | 0.1716  | 0.0218  | 0.1326  | 0.0522  | -0.0409 | 0.0518  | 0.1499  | 0.0891  | 0.073   |
| PBANKA_100110 | -0.2223 | 0.0831  | 0.2957  | 0.6744  | 0.1914  | 0.2868  | 0.0624  | -0.3489 | -0.312  | -0.0244 | -0.2451 | 0.0597  |
| PBANKA_020960 | 0.1391  | -0.3223 | 0.5783  | 0.0221  | 0.1807  | 0.5551  | -0.2928 | -0.5106 | -0.2109 | -0.1684 | -0.8652 | -0.235  |
| PBANKA_040950 | -0.0179 | 0.0689  | -0.0458 | 0.0944  | -0.0727 | 0.6142  | 0.3537  | 0.0529  | 0.2303  | 0.2512  | 0.0021  | 0.1448  |
| PBANKA_102700 | -0.5932 | -0.7404 | -0.8901 | -1.3557 | -0.6987 | -1.2268 | -0.9758 | -0.9562 | -1.8659 | -0.9368 | -1.3068 | -0.6356 |
| PBANKA_145960 | -0.303  | 0.2195  | -0.0714 | -1.2616 | -0.0078 | -0.2042 | -0.3347 | -0.2878 | -0.2803 | -0.415  | -0.5901 | -0.2942 |
| PBANKA_092580 | -0.1525 | 0.1517  | -0.3406 | -0.4762 | -0.0397 | -0.5843 | -0.167  | -0.0668 | 0.2125  | 0.0761  | -0.0926 | 0.1723  |
| PBANKA_060630 | 0.1514  | 0.2107  | 0.0634  | 0.1077  | -0.0191 | -0.3469 | -0.2355 | 0.0646  | 0.1447  | 0.4573  | 0.2955  | 0.2955  |
| PBANKA_120040 | 0.3872  | 0.0347  | 0.2313  | 0.0335  | 0.2902  | 0.1705  | -0.1    | 0.2258  | -0.2892 | -0.5291 | 0.2448  | 0.1677  |
| PBANKA_103370 | 0.2677  | 0.0895  | -0.2703 | 0.0139  | -0.1525 | -0.1759 | 0.0182  | 0.5536  | 0.4818  | 0.8244  | 0.9109  | 1.197   |
| PBANKA_120480 | 0.2678  | 0.2383  | 0.0415  | -0.092  | 0.0415  | 0.7181  | -0.1116 | -0.1582 | -0.099  | -0.3061 | -0.5475 | -0.369  |
| PBANKA_093820 | -0.0644 | -0.3762 | -0.2183 | -0.2953 | -0.0182 | -0.0019 | 0.1214  | 0.0943  | 0.1234  | -0.0931 | -0.5274 | -0.0448 |
| PBANKA_070720 | -0.1316 | -0.1362 | -0.1131 | -0.1744 | -0.0454 | -0.3975 | -0.1414 | 0.1518  | 0.496   | 0.3809  | 0.6814  | 0.9394  |
| PBANKA_051420 | -0.1631 | -1.325  | -0.3831 | -0.0872 | -0.159  | -0.1906 | -0.091  | 0.138   | 0.531   | 0.494   | 1.3862  | 0.7724  |
| PBANKA_080280 | -0.071  | 0.2295  | 0.1186  | -0.4994 | -0.1016 | 0.2211  | 0.6497  | 0.5747  | 0.4268  | 0.5651  | 1.5527  | 0.0754  |
| PBANKA_090160 | -0.3223 | -0.1865 | -0.1525 | -0.2968 | -0.2703 | 0.759   | -0.2486 | -0.2483 | -0.3597 | -0.2635 | -0.246  | -0.3477 |
| PBANKA_103240 | -0.1068 | -0.6502 | -0.4796 | -0.8538 | 0.3283  | -0.3093 | -0.2582 | 0.1666  | -0.087  | 0.3511  | 0.541   | 0.7491  |
| PBANKA_131360 | -0.0487 | 0.113   | -0.1676 | 0.3984  | -0.0446 | 0.4431  | -0.0269 | -0.1771 | -0.0906 | -0.0407 | -0.0513 | -0.197  |
| PBANKA_131880 | -0.4706 | 0.5247  | -0.4582 | -0.5767 | -0.1813 | -0.2665 | 0.0918  | -0.1136 | 0.2197  | 0.2541  | 0.0906  | 0.5734  |
| PBANKA_031350 | -0.0359 | -0.0902 | 0.0102  | 0.1964  | -0.106  | 0.411   | 0.5424  | 0.3165  | 0.1807  | 0.554   | 0.0726  | 0.0854  |
| PBANKA_093100 | -0.1056 | 0.0391  | 0.0174  | -0.1881 | 0.2031  | 0.246   | 0.2534  | 0.3973  | -0.0545 | -0.3726 | -0.2357 | -0.6022 |
| PBANKA_041210 | 0.0187  | 0.193   | 0.0524  | 0.0759  | 0.5365  | 0.5176  | 0.0307  | 0.0201  | 0.0798  | -0.0504 | -0.1299 | 0.5751  |
| PBANKA_062180 | 0.0694  | -0.0032 | -0.1251 | 0.2168  | 0.0584  | 0.7544  | -0.1109 | -0.054  | 0.5255  | 0.0949  | 1.4579  | 1.1195  |
| PBANKA_123260 | -0.1484 | -1.2744 | -0.2045 | 0.0456  | -0.2026 | -0.1835 | -0.4811 | 0.023   | 0.0388  | 0.2539  | 0.2926  | 0.5524  |
| PBANKA_120360 | 0.1218  | 0.3311  | -0.2978 | -0.4162 | -0.2357 | -0.1524 | -0.1765 | -0.7225 | -0.4837 | -0.1071 | 0.1406  | -0.4572 |
| PBANKA_083540 | 0.2143  | 0.6316  | 0.1193  | 0.2001  | 0.4566  | 0.3115  | 0.0864  | 0.529   | 0.4053  | 0.3135  | 0.3618  | 0.3665  |
| PBANKA_103570 | 0.3873  | 0.246   | 0.1791  | 0.0483  | -0.1005 | -0.0796 | 0.2847  | 0.3151  | 0.1478  | 0.4842  | 0.1688  | 0.2613  |
| PBANKA_112890 | -0.0935 | -0.2155 | -0.1513 | 0.1555  | -0.0887 | -2.0054 | -0.0148 | 0.4084  | 0.1626  | 0.8336  | 1.1978  | 0.7147  |
| PBANKA_123850 | 0.1892  | -0.8455 | 0.0049  | 0.69    | -0.2183 | -0.5996 | -0.0142 | 0.0054  | -0.4036 | -0.2518 | -0.3989 | -0.1984 |
| PBANKA_140330 | -0.0142 | -0.1461 | -0.5431 | 0.2027  | -0.1662 | 0.0407  | 0.1765  | 0.4459  | 0.3331  | 0.6275  | 0.7448  | -0.1089 |
| PBANKA_103250 | 0.1579  | 0.4005  | 0.1483  | -0.1184 | 0.2996  | -0.5421 | -0.1352 | -0.1182 | -0.2885 | -0.0519 | -0.2395 | -0.3256 |
| PBANKA_141360 | 0.0927  | 0.0136  | 0.0468  | 0.3117  | -0.0325 | 0.0263  | -0.1663 | 0.3799  | 0.4118  | 0.2216  | 0.4615  | 0.132   |
| PBANKA_132040 | 0.0429  | -0.0485 | -0.0294 | 0.0459  | 0.4674  | -0.0246 | 0.0607  | -0.0542 | -0.3582 | -0.1136 | -0.2984 | -0.3216 |
| PBANKA_102050 | -0.4893 | -0.1472 | -0.9207 | -1.7364 | -0.4374 | -0.8071 | -0.2949 | -1.084  | -0.845  | -0.2704 | -0.0197 | 0.1703  |
| PBANKA_123960 | 0.2136  | 0.7967  | 0.3172  | 0.1355  | -0.0407 | -1.2754 | 0.0266  | -0.1527 | -0.2621 | 0.019   | 0.0613  | 0.4415  |
| PBANKA_120890 | -0.0142 | 0.0979  | -0.3199 | 0.1284  | -0.1112 | -0.3017 | -0.1534 | -0.1008 | 0.354   | 0.2553  | 1.4296  | 1.6339  |
| PBANKA_146390 | -0.4347 | -0.1446 | -0.296  | 0.0959  | 0.0621  | -0.0913 | 0.042   | 0.0065  | 0.4572  | 0.3713  | 1.2145  | 0.8573  |
| PBANKA_141990 | -0.3499 | -0.6186 | -0.3974 | -0.8184 | -0.2293 | 0.1474  | -0.2737 | -0.2363 | -0.0614 | 0.0295  | -0.4086 | -0.2928 |
| PBANKA_031260 | -0.5924 | -0.6292 | -0.0456 | -0.3485 | -0.8393 | 0.4889  | 0.4717  | 0.6587  | 0.7607  | 0.569   | 0.3602  | 0.1766  |
| PBANKA_114530 | -0.06   | 0.0093  | -0.4623 | -1.0091 | -0.4146 | -0.1982 | -0.4055 | -0.6688 | -0.3896 | -0.0573 | 0.3871  | -0.0141 |
| PBANKA_131010 | -0.3221 | 0.1655  | -0.0599 | 0.603   | 0.0661  | 0.3523  | 0.0424  | -0.0391 | -0.0154 | -0.0376 | 0.368   | -0.3582 |
| PBANKA_134390 | -0.2894 | 0.1204  | -0.4197 | 0.1851  | -0.1661 | -0.3077 | 0.224   | -0.0393 | -0.2662 | -0.1007 | -0.2851 | -0.219  |
| PBANKA_021460 | 0.2803  | 0.0058  | -0.3286 | -0.4048 | -0.1517 | -0.5605 | -0.1766 | 0.3803  | -0.0133 | 0.4932  | 1.0723  | 1.0358  |
| PBANKA_051830 | -0.0458 | 1.3517  | 0.0014  | -0.0004 | 0.1414  | 0.0337  | 0.1895  | -0.4457 | -0.5633 | -0.1886 | -0.2211 | -0.3357 |
| PBANKA_071380 | -0.1028 | -0.1174 | -0.0705 | 0.1815  | 0.0494  | 0.0513  | -0.0029 | -0.353  | -0.1662 | -0.1202 | 0.3841  | -0.2654 |
| PBANKA_081180 | -0.3171 | -0.8832 | -0.1142 | -0.2491 | -0.3203 | -0.1686 | 0.1462  | 0.4121  | 0.3038  | 0.2765  | 0.3197  | -0.2057 |
| PBANKA_031390 | 0.2387  | -0.7743 | 0.5103  | 0.4397  | 0.4646  | 0.9551  | -0.1143 | 0.0261  | 0.0413  | -0.1141 | -0.2623 | -0.5137 |
| PBANKA_144960 | -0.2313 | 0.1303  | -0.0255 | -0.1664 | -0.021  | -0.5809 | 0.3955  | 0.3164  | 0.2705  | 0.3943  | 0.1822  | 0.4002  |
| PBANKA_110280 | 0.6794  | -0.3828 | 0.2289  | 0.3957  | 0.3584  | -0.0446 | -0.0432 | -0.1895 | -0.2628 | -0.3389 | -0.4135 | -0.2142 |
| PBANKA_130450 | -0.0662 | 0.027   | -0.2553 | -0.1076 | -0.2446 | -0.3213 | 0.3055  | 0.4791  | 0.8522  | 0.6598  | 0.6497  | 1.119   |
| PBANKA_142220 | 0.2948  | 0.1577  | 0.3106  | 0.6989  | 0.264   | 0.1764  | -0.1726 | -0.4414 | -0.6316 | -0.8781 | -0.205  | -1.0594 |
| PBANKA_102450 | 0.2327  | 0.1693  | 0.2712  | 0.3908  | 0.1632  | 0.7913  | 0.2098  | 0.0788  | -0.3013 | -0.2436 | -0.4907 | -0.8506 |
| PBANKA_080220 | -0.1713 | -0.0069 | -0.3806 | -0.4661 | -0.0442 | -0.1146 | -0.1786 | 0.0912  | 0.2695  | 0.2388  | -0.487  | -0.1652 |
| PBANKA_124600 | 0.7296  | 0.3434  | 0.1723  | 0.1618  | 0.252   | -0.6276 | -0.3477 | -0.3923 | -0.1607 | -0.1268 | 0.5374  | 0.8373  |
| PBANKA_082220 | 0.2948  | 0.5197  | -0.1427 | -0.3049 | -0.0224 | -0.7233 | -0.3146 | -0.5719 | -0.3351 | -0.2587 | -0.6227 | -0.2501 |

|               |         |         |         |         |         |         |         |         |         |         |         |         |
|---------------|---------|---------|---------|---------|---------|---------|---------|---------|---------|---------|---------|---------|
| PBANKA_130750 | -0.0047 | 0.0124  | 0.12    | -0.1778 | 0.0426  | -0.0676 | -0.1199 | -0.2472 | -0.0545 | 0.1357  | 0.1524  | -0.1236 |
| PBANKA_122450 | -0.2352 | -1.2828 | -0.1151 | -0.2652 | 0.2838  | -1.3444 | 0.57    | 0.502   | 0.1937  | 0.4515  | -0.0857 | -0.0349 |
| PBANKA_081110 | 0.1407  | 0.8212  | -0.1172 | -0.531  | -0.3135 | 0.5877  | -0.39   | -0.1254 | -0.1244 | -0.2943 | 0.0019  | 0.0253  |
| PBANKA_131590 | 0.204   | 0.6457  | 0.1907  | 0.4107  | 0.282   | 0.5104  | 0.1717  | -0.1109 | -0.0704 | -0.0734 | -0.2591 | 0.0501  |
| PBANKA_072200 | 0.1948  | -0.7331 | 0.0791  | -0.4589 | 0.3664  | 0.8479  | 0.0778  | 0.3259  | 0.1425  | 0.2217  | -0.1167 | -0.1162 |
| PBANKA_071490 | -0.3481 | -0.3802 | -0.2535 | -0.4935 | -0.5243 | -0.5908 | -0.0547 | -0.3443 | -0.4415 | -0.7743 | -0.3472 | -0.1481 |
| PBANKA_134940 | -0.0432 | 0.0839  | -0.1628 | 0.3751  | 0.0243  | -0.0494 | -0.0449 | 0.4948  | 0.4397  | 0.1418  | 1.5286  | -0.048  |
| PBANKA_133370 | -0.2009 | 0.2893  | -0.2035 | -0.3905 | -0.2493 | 0.0632  | -0.2257 | -0.2157 | 0.0885  | 0.6275  | 1.0467  | 0.9619  |
| PBANKA_136250 | -0.1259 | -0.0894 | -0.2751 | 0.1794  | -0.0995 | -0.2182 | -0.0888 | 0.1041  | 0.2159  | 0.2613  | 0.5181  | 0.214   |
| PBANKA_061870 | 0.096   | 0.6675  | 0.0875  | 0.0319  | 0.1045  | 0.4617  | 0.0767  | 0.0966  | 0.1961  | 0.0611  | -0.3843 | 0.5186  |
| PBANKA_103720 | 0.3971  | -0.7972 | 0.1016  | 0.6777  | 0.4961  | 0.0589  | 0.2378  | 0.3756  | 0.0564  | 0.0152  | 0.0592  | 0.5367  |
| PBANKA_146490 | -0.5684 | -0.1453 | -0.3452 | -0.1004 | -0.2947 | -0.1956 | 0.3556  | 0.4777  | 0.0932  | 0.6042  | 0.2218  | -0.1072 |
| PBANKA_080330 | -0.2611 | -1.5073 | -0.2538 | -0.6441 | -0.5546 | -0.6327 | -0.6792 | -0.8853 | -0.5377 | -0.6575 | -0.5859 | -0.381  |
| PBANKA_113880 | 0.3435  | -0.1738 | -0.1238 | -0.1778 | -0.1129 | -0.2271 | 0.1931  | -0.1102 | 0.3621  | 0.6573  | 0.2051  | -0.177  |
| PBANKA_010140 | 0.354   | 1.0435  | -0.3559 | -0.477  | 0.1658  | -0.3302 | -0.3492 | -0.2783 | -0.5004 | -0.5319 | -0.4824 | 0.5187  |
| PBANKA_121200 | -0.1273 | -0.303  | -0.0229 | 0.43    | 0.3006  | 0.4003  | 0.2473  | 0.4142  | 0.4496  | 0.1315  | -0.3635 | -0.0762 |
| PBANKA_143520 | -0.2263 | 0.0542  | 0.006   | -0.0225 | -0.444  | -0.0874 | 0.1429  | 0.285   | 0.4461  | 0.7181  | 1.8478  | 0.5457  |
| PBANKA_111450 | 0.4692  | 0.3396  | -0.0013 | 0.1474  | -0.1902 | 0.6599  | -0.1529 | 0.2353  | 0.0492  | -0.0015 | -0.214  | 0.2681  |
| PBANKA_040120 | -0.1083 | -0.0575 | 0.0505  | 0.1496  | -0.0125 | -0.162  | -0.2506 | 0.0906  | 0       | 0.2178  | -0.3317 | -0.3208 |
| PBANKA_113220 | 0.7016  | 0.5134  | 0.7346  | 0.5484  | 0.3666  | 0.7353  | 0.317   | 0.3188  | -0.2103 | -0.0114 | -0.5808 | -0.2441 |
| PBANKA_103040 | 0.5455  | -0.0203 | -0.117  | -0.2446 | -0.2025 | -1.7461 | -0.1367 | 0.2648  | 0.2287  | 0.5938  | 0.0646  | 0.2028  |
| PBANKA_040850 | -0.5131 | -0.2426 | -0.0432 | -0.0701 | 0.1175  | 1.0498  | 0.2824  | 0.5118  | 0.4328  | 0.271   | -0.2189 | 0.1268  |
| PBANKA_031100 | -0.2431 | 0.674   | 0.0759  | -0.0902 | -0.1025 | -0.8987 | -0.0738 | 0.2178  | -0.1507 | -0.0067 | 0.1611  | 0.1417  |
| PBANKA_134750 | -0.047  | -0.0354 | 0.4234  | -0.474  | 0.5049  | -0.2608 | 0       | 0.4474  | 0.0856  | 0.2724  | 0.5078  | 0.0959  |
| PBANKA_111010 | -0.1855 | 0.0174  | 0.4597  | 0.2884  | 0.1213  | 0.0636  | 0.29    | 0.0917  | 0.1573  | 0.2157  | 0.2521  | 0.2847  |
| PBANKA_094330 | -0.0811 | 0.1977  | -0.2164 | -0.4248 | -0.1822 | -0.0396 | -0.4077 | -0.1882 | -0.609  | -0.6357 | -0.9622 | -0.527  |
| PBANKA_061560 | -0.0762 | 0.7455  | -0.0653 | -0.3693 | 0.2219  | 0.3585  | -0.1892 | -0.159  | -0.5329 | -0.3136 | -0.4677 | -0.2307 |
| PBANKA_134430 | -0.3474 | -0.7054 | -0.4238 | 0.0723  | -0.3608 | 0.1852  | 0.243   | 0.3635  | 0.2579  | 0.1621  | 0.0242  | -0.1374 |
| PBANKA_021250 | -0.1389 | 0.3685  | 0.4033  | 0.1303  | 0.206   | 0.7364  | 0.2675  | 0.0976  | -0.3549 | -0.3885 | -0.7888 | -0.516  |
| PBANKA_136160 | 0.0305  | -0.043  | 0.0216  | 0.3126  | -0.02   | -0.0717 | 0.408   | 0.3405  | 0.3861  | 0.3757  | 0.6223  | 0.4043  |
| PBANKA_103540 | -1.1588 | -1.4663 | -1.2636 | -0.6922 | -0.5663 | -0.1659 | 0.2641  | 0.7579  | 0.9774  | 1.03    | 0.3405  | 0.4132  |
| PBANKA_090150 | 0.3348  | -0.3936 | -0.0955 | 0.1853  | 0.1991  | 0.7427  | 0.0291  | -0.2212 | -0.0302 | -0.0504 | -0.2916 | -0.1982 |
| PBANKA_091850 | -0.4146 | -0.8926 | -0.6217 | -0.1191 | -0.1676 | -0.0067 | -0.1092 | 0.0369  | 0.018   | -0.0463 | 0.3941  | -0.4489 |
| PBANKA_134690 | -0.4104 | 0.0072  | -0.1038 | -0.1318 | -0.2469 | -0.8132 | -0.0395 | 0.0902  | 0.18    | 0.1421  | 0.7354  | 0.9616  |
| PBANKA_052100 | -0.208  | 0.3733  | 0.3098  | -0.1407 | 0.0396  | -0.8072 | -0.011  | -0.0128 | -0.3695 | -0.1215 | 0.3051  | 0.0663  |
| PBANKA_092970 | -0.0242 | -0.1366 | 0.1429  | 0.1989  | 0.0654  | 0.3041  | -0.0237 | 0.2242  | 0.1586  | -0.3669 | -0.3253 | -0.414  |
| PBANKA_112610 | 0.3482  | 0.1272  | -0.0056 | -0.1241 | 0.1044  | -0.2235 | 0.1248  | 0.055   | -0.2027 | -0.3847 | -0.4166 | -0.354  |
| PBANKA_090350 | -0.269  | -0.1258 | -0.4793 | -0.0944 | -0.0438 | -0.556  | -0.2045 | -0.0391 | -0.1814 | 0.1573  | 0.4251  | -0.1156 |
| PBANKA_141770 | -1.1659 | -0.6236 | -0.3559 | 0.0952  | -0.0722 | -0.3426 | 0.1626  | 0.231   | 0.4385  | 0.6586  | -0.6384 | -0.0832 |
| PBANKA_132900 | -0.4551 | -0.2616 | -0.2178 | -0.3076 | -0.0391 | -0.5728 | 0.2101  | 0.2791  | -0.1393 | 0.0598  | -0.3556 | -0.3602 |
| PBANKA_082900 | 0.0901  | 0.6404  | 0.039   | -0.1923 | 0.1734  | -1.1482 | -0.2074 | -0.0306 | -0.3764 | -0.2885 | -0.2178 | -0.1953 |
| PBANKA_124530 | -0.1333 | -0.0223 | 0.2273  | -0.1411 | 0.135   | -0.5382 | -0.0092 | 0.2416  | 0.4452  | 0.2955  | -0.2523 | -0.1452 |
| PBANKA_092730 | -0.0455 | -0.1482 | -0.4086 | -0.5972 | -0.3332 | -0.6579 | 0.293   | 0.4555  | 0.5231  | 0.4181  | 0.1169  | -0.2187 |
| PBANKA_144930 | -0.1041 | -0.2496 | -0.0323 | -0.121  | -0.1358 | -0.1328 | -0.0283 | -0.0704 | 0.3409  | 0.2112  | 0.423   | 0.6485  |
| PBANKA_083250 | -0.4993 | -0.6231 | -0.5036 | -0.7256 | -0.1023 | -0.5296 | 0.6295  | 0.464   | 0.8402  | 0.6922  | -0.1383 | -0.1016 |
| PBANKA_082400 | 0.4259  | 0.2523  | 0.3716  | 1.2215  | -1.2994 | 1.0912  | 0.3781  | 0.277   | 0.1764  | 0.0252  | -0.6689 | 0.7985  |
| PBANKA_050500 | -0.2243 | -0.3791 | -0.2005 | 0.0546  | -0.1495 | -0.299  | 0.1893  | 0.0931  | -0.0152 | 0.0927  | -0.7722 | -0.0727 |
| PBANKA_122940 | -0.0539 | -0.2836 | -0.2674 | 0.0264  | 0.1642  | 0.8109  | 0.1343  | 0.3924  | 0.3019  | 0.5475  | 0.5222  | -0.0846 |
| PBANKA_121040 | -0.7227 | -0.3329 | -0.4618 | -0.348  | -0.2877 | -0.369  | -0.1118 | 0.2204  | -0.1332 | 0.3023  | -0.4787 | -0.2785 |
| PBANKA_040270 | -0.6128 | 0.0255  | -0.6387 | -0.7605 | -0.4461 | -0.4125 | -0.6885 | -0.2644 | 0.1481  | 0.6449  | 1.0654  | 1.2116  |
| PBANKA_083030 | -0.2239 | -0.5614 | -0.0539 | 0.5917  | -0.3817 | -0.631  | -0.0708 | 0.2613  | 0.8447  | 0.6366  | 0.3735  | 1.7108  |
| PBANKA_060100 | 0.4024  | 0.2952  | 0.0003  | -0.0201 | 0.1147  | -0.1523 | -0.0083 | 0.2018  | -0.1981 | -0.1601 | -0.4193 | -0.4154 |
| PBANKA_146150 | -0.023  | 0.1819  | -0.0802 | 0.0888  | 0.4519  | -1.0721 | 0.42    | 0.4494  | 0.1676  | 0.0219  | -0.204  | 0.3751  |
| PBANKA_103680 | 0.1722  | 0.228   | 0.0789  | -0.2378 | 0.1449  | -0.4056 | -0.1523 | 0.0609  | -0.3478 | -0.3339 | -0.3541 | -0.6314 |
| PBANKA_123020 | 0.2334  | -0.4066 | 0.5071  | -0.5381 | -0.2486 | 0.3032  | 0.0599  | 0.655   | 0.1391  | 0.1423  | 0.9732  | 0.1851  |
| PBANKA_136220 | -0.1414 | -0.0827 | -0.0921 | -0.0774 | -0.3632 | 0.2345  | -0.202  | -0.0984 | 0.1944  | -0.18   | -0.2486 | -0.4243 |
| PBANKA_051730 | -0.1421 | 0.0991  | -0.0605 | -0.7085 | -0.383  | -0.7575 | 0.2804  | 0.0353  | 0.4148  | 0.3604  | -0.0482 | -0.0113 |
| PBANKA_112520 | -0.1323 | -0.0619 | -0.3289 | -0.1789 | -0.0906 | -0.0849 | 0.1886  | 0.5022  | 0.2813  | 0.317   | -0.0919 | 0.1283  |
| PBANKA_103890 | -0.3259 | 0.2293  | 0.0486  | -0.0069 | -0.2289 | -0.7897 | 0.157   | 0.4434  | -0.1084 | 0.1808  | -0.2292 | 0.0854  |
| PBANKA_101020 | 0.1074  | -0.6914 | -0.3033 | -0.294  | -0.2261 | -0.2999 | -0.3169 | -0.6074 | -0.4184 | -0.0051 | 0.5168  | 0.2404  |
| PBANKA_030670 | -1.1362 | -0.8908 | -0.9901 | -1.4791 | -0.8247 | -1.1991 | 0.1737  | -0.9369 | -0.4129 | -0.2047 | -1.1956 | -0.2488 |
| PBANKA_090770 | -0.4688 | -0.4257 | -0.41   | -0.4097 | -0.4509 | -0.6271 | 0.2616  | 0.5288  | 0.4928  | 0.3739  | -0.093  | -0.191  |
| PBANKA_100920 | -0.3659 | -0.1238 | -0.0994 | 0.0664  | 0.1844  | 0.1144  | 0.0944  | 0.3783  | 0.8878  | 1.2957  | 0.1591  | 0.675   |

|               |         |         |         |         |         |         |         |         |         |         |         |         |
|---------------|---------|---------|---------|---------|---------|---------|---------|---------|---------|---------|---------|---------|
| PBANKA_141680 | -0.4002 | -0.2261 | -0.2897 | -0.0312 | -0.0199 | 0.1467  | 0.1562  | 0.2403  | 0.0905  | 0.1501  | 0.1268  | -0.1358 |
| PBANKA_071270 | -0.3119 | -0.1892 | -0.3338 | 0.0438  | -0.1888 | 0.251   | -0.0081 | 0.069   | 0.4831  | 0.5458  | 1.094   | -0.3209 |
| PBANKA_133650 | 0.0757  | 0.2589  | 0.1241  | -0.0221 | 0.1052  | -0.3141 | 0.1667  | 0.1891  | 0.1077  | -0.158  | -0.1707 | -0.3889 |
| PBANKA_132240 | -0.1715 | -0.0947 | -0.187  | -0.348  | 0.2729  | 0.1558  | 0.2321  | 0.0826  | -0.0142 | -0.1965 | 0.0421  | -0.5286 |
| PBANKA_140260 | 0.0513  | 0.4129  | -0.3733 | -0.2693 | 0.1478  | -0.1627 | -0.0085 | 0.3713  | 0.0906  | 0.0125  | 0.1226  | 0.0372  |
| PBANKA_123320 | -0.2579 | 0.3706  | -0.6319 | -0.509  | 0.0073  | -0.8169 | 0.0505  | 0.1871  | 0.3138  | 0.4178  | -0.378  | 1.2318  |
| PBANKA_143030 | 0.0124  | -0.2733 | -0.6077 | -0.283  | 0.2751  | -0.9118 | -0.3972 | -0.0548 | 0.6344  | 0.5504  | 0.4872  | 1.5438  |
| PBANKA_051220 | 0.2035  | 0.3604  | 0.2336  | 0.019   | 0.3217  | 0.2244  | -0.2829 | -0.4137 | 0.1353  | -0.0105 | 0.3544  | 0.2323  |
| PBANKA_082920 | -0.6869 | -0.7874 | -0.4641 | -0.5569 | -1.6868 | 0.621   | 0.63    | 0.1092  | 0.4278  | 0.3634  | -0.3591 | -0.2337 |
| PBANKA_130860 | 0.1616  | 0.8589  | 0.5959  | -0.0437 | 0.4752  | -0.111  | -0.9287 | -1.5009 | -1.2736 | -1.4417 | -1.0289 | -0.8542 |
| PBANKA_061180 | 0.3922  | 0.6318  | 0.5041  | -0.6433 | -0.7399 | 0.5756  | 0.4076  | 0.2663  | 0.3126  | 0.121   | -0.1999 | 0.2611  |
| PBANKA_090390 | -0.7269 | -0.4467 | -1.4197 | -0.8019 | -0.7837 | -0.2797 | -0.9159 | -0.9347 | -1.1614 | -0.7334 | -0.5089 | -0.6491 |
| PBANKA_103130 | -0.5103 | -0.4265 | -0.6335 | -0.3434 | 0.2855  | -1.2899 | -0.1682 | -0.4037 | -0.1463 | -0.2176 | -0.3578 | -0.2396 |
| PBANKA_091590 | 0.6065  | 0.5433  | 1.4969  | 0.204   | -1.2352 | 0.6402  | -0.0778 | -0.1873 | 0.524   | 0.7301  | 1.0487  | 0.705   |
| PBANKA_052450 | -0.3497 | -0.1049 | -0.3338 | 0.2677  | -0.2918 | -0.17   | 0.2037  | -0.1582 | 0.4893  | 0.9124  | 0.8937  | 0.7181  |
| PBANKA_144440 | -0.1494 | -0.2833 | -0.1785 | -0.0877 | 0.0226  | 0.4241  | 0.5812  | 0.33    | 0.238   | 0.2096  | -0.5489 | -0.1736 |
| PBANKA_131940 | -0.2273 | 0.2611  | -0.0943 | 0.2174  | -0.0475 | 0.128   | 0.1177  | 0.2513  | 0.1555  | 0.5457  | 0.6152  | -0.3647 |
| PBANKA_100450 | -0.066  | 0.0587  | 0.3212  | 0.0864  | -0.0065 | -0.7649 | 0.2641  | -0.0007 | -0.1474 | 0.2623  | -0.0437 | 0.166   |
| PBANKA_052010 | 0.0327  | 0.1392  | -0.0448 | -0.0992 | 0.2311  | -0.4671 | 0.0981  | -0.1197 | 0.4759  | 0.2462  | 0.5293  | 0.4238  |
| PBANKA_081830 | 0.0214  | -0.1285 | -0.3639 | -0.1327 | -0.0652 | 0.827   | 0.0074  | 0.3746  | 0.6392  | 0.2407  | 0.4483  | -0.1746 |
| PBANKA_082960 | 0.35    | 0.0619  | 0.1774  | 1.1338  | 0.2723  | -0.6561 | -0.2454 | 0.2919  | -0.1565 | -0.096  | -0.2809 | 0.6867  |
| PBANKA_030600 | -0.129  | 0.8215  | -0.0914 | -0.2322 | 0.1297  | -0.0464 | -0.1147 | -0.1151 | 0.238   | 0.1391  | 0.2563  | 0.7372  |
| PBANKA_100280 | 0.4088  | 0.6644  | 0.1166  | 0.3699  | -0.4622 | -0.0227 | 0.0911  | -0.2115 | -0.6515 | -0.1469 | 0.1744  | -0.0697 |
| PBANKA_132510 | -0.1629 | -1.1954 | -0.2664 | -0.1271 | -0.0834 | -0.3631 | -0.2078 | -0.2528 | -0.0692 | 0.0681  | -0.0303 | 0.6973  |
| PBANKA_141160 | 0.3165  | 1.3404  | -0.2673 | -0.2158 | 0.1746  | 0.0754  | 0.1756  | 0.3862  | -0.1424 | -0.0061 | 0.1623  | 0.1959  |
| PBANKA_020900 | -0.1422 | -0.1051 | -0.2819 | -0.2639 | -0.1083 | 0.1107  | -0.0658 | 0.0755  | 0.1838  | 0.3343  | 0.2936  | -0.0061 |
| PBANKA_061670 | -0.1671 | 0.1739  | -0.4963 | -0.204  | -0.148  | -0.6022 | -0.1237 | -0.0699 | 0.2009  | 0.2258  | 0.6137  | 0.5963  |
| PBANKA_093160 | -0.0227 | -0.4043 | -0.1976 | -0.4855 | 0.0156  | -0.9006 | -0.0724 | 0.1409  | 0.0539  | 0.162   | -0.513  | -0.3602 |
| PBANKA_101820 | 0.0132  | -0.2524 | -0.4216 | -0.1169 | -0.0354 | -0.1866 | -0.4421 | 0.1098  | 0.4656  | 0.699   | 1.6505  | 1.242   |
| PBANKA_071470 | 0.2991  | 0.528   | -0.0606 | 0.0231  | -0.0904 | -0.3705 | -0.0013 | -0.0765 | -0.0967 | -0.0385 | 0.1739  | 0.2744  |
| PBANKA_052150 | -0.3057 | -0.0209 | 0.1763  | 0.1327  | -0.1885 | 0.4875  | 0.0994  | 0.2934  | 0.4097  | 0.4523  | 0.7922  | 0.4024  |
| PBANKA_121830 | -0.1141 | -1.3869 | -0.0922 | 0.0461  | -0.0721 | -0.2676 | -0.3219 | -0.1583 | 0.7195  | 0.6287  | 0.6876  | 1.7465  |
| PBANKA_112410 | 0.4895  | 0.3208  | 0.1     | 0.4114  | -0.1572 | -0.1384 | -0.1575 | 0.046   | 0.2207  | 0.5765  | -0.1174 | 0.5878  |
| PBANKA_081090 | -0.1218 | 0.5895  | 0.4258  | -0.2257 | -0.2629 | -0.0723 | 0.2535  | -0.2478 | -0.1145 | -0.0738 | 0.0444  | 0.7856  |
| PBANKA_082450 | -0.0317 | -0.5025 | 0.2399  | -0.1093 | -0.0062 | 0.4641  | 0.5921  | 0.5056  | 0.3608  | 0.151   | -0.4656 | -0.4127 |
| PBANKA_131970 | 0.1428  | -0.2211 | -0.0332 | -0.1969 | -0.0579 | -0.1115 | 0.1452  | -0.3549 | 0.3491  | -0.1432 | -0.4204 | -0.5087 |
| PBANKA_144900 | -0.215  | -0.3388 | -0.019  | 0.2953  | 0.2068  | -1.2562 | 0.0579  | 0.2009  | 0.6813  | 0.6879  | 0.6601  | 1.7496  |
| PBANKA_051330 | 0.128   | -0.5657 | -0.2005 | -0.2446 | -0.1004 | -0.1827 | 0.0325  | -0.0202 | 0.0642  | -0.2183 | -0.6202 | -0.1187 |
| PBANKA_103770 | 0.1538  | 0.3711  | 0.1018  | -0.1782 | -0.3202 | -0.2926 | -0.127  | -0.6001 | -0.5382 | -0.4962 | -0.3497 | -0.6376 |
| PBANKA_031200 | -0.4593 | -0.1697 | -0.5124 | -1.0174 | -0.5633 | -1.1907 | -0.3581 | -0.2048 | -0.1317 | 0.0664  | 0.1585  | 0.4296  |
| PBANKA_112970 | 0.076   | -0.2458 | -0.2745 | -1.9349 | -0.0783 | -0.1716 | 0.1545  | 0.1735  | 0.2187  | 0.3376  | 0.9331  | 1.4056  |
| PBANKA_060200 | 0.0694  | 0.1998  | 0.2525  | -0.2278 | -0.5525 | 0.3089  | 0.1869  | 0.0439  | 0.1453  | 0.0487  | -0.2255 | 0.411   |
| PBANKA_090210 | 0.0234  | -1.2077 | -0.02   | -0.1652 | 0.0398  | -1.2397 | 0.0677  | 0.0279  | 0.3525  | 0.5977  | 0.2241  | -0.3597 |
| PBANKA_040690 | 0.0489  | -0.4117 | -0.0972 | -0.421  | 0.0078  | -1.1811 | 0.3666  | 0.3287  | 0.3909  | 0.5509  | 0.3475  | 0.0062  |
| PBANKA_122510 | 0.4732  | 0.2731  | -0.2251 | -0.9339 | 0.1611  | -0.6419 | -0.0552 | 0.1191  | 0.0012  | 0.1129  | -0.1528 | -0.1978 |
| PBANKA_130900 | -0.5303 | 0.2322  | -0.0239 | -0.5913 | -0.052  | -0.1278 | 0.2182  | 0.0186  | 0.2039  | 0.0669  | 0.8541  | 1.025   |
| PBANKA_131070 | -0.1456 | 0.12    | -0.1054 | 0.4532  | -0.0623 | 0.5086  | 0.3563  | 0.2326  | 0.1635  | 0.1503  | -0.0459 | 0.2486  |
| PBANKA_136000 | -0.1458 | 0.5263  | -0.4272 | -0.7934 | 0.0738  | 0.3669  | 0.4024  | 0.306   | 0.0321  | 0.0811  | 0.0982  | -0.2883 |
| PBANKA_102280 | 0.4348  | 1.0531  | 0.1262  | 0.1011  | 0.1404  | -0.0692 | -0.1689 | -0.2309 | -0.3964 | -0.3189 | -0.3292 | -0.4825 |
| PBANKA_141240 | -0.4616 | 0.8949  | 0.1673  | 0.3434  | 0.0123  | 0.2582  | -0.1966 | -0.4358 | -0.1375 | 0.0536  | 1.0469  | -0.0918 |
| PBANKA_083160 | -0.1046 | 0.0394  | -0.1761 | 0.3751  | -0.0465 | -0.2459 | -0.1264 | 0.0978  | 0.2788  | 0.4967  | -0.4283 | 0.3757  |
| PBANKA_131450 | 0.4278  | 0.1607  | 0.2957  | 0.4039  | 0.2056  | -0.4861 | -0.3402 | -0.258  | -0.5767 | -0.7785 | -0.2875 | -0.112  |
| PBANKA_132380 | -0.001  | -0.0988 | -0.0807 | -0.0976 | 0.0682  | 0.0582  | -0.1854 | -0.4247 | -0.0529 | 0.2037  | 0.4077  | 0.2918  |
| PBANKA_131660 | 0.2152  | 0.2406  | 0.2747  | 0.3089  | -0.3676 | 0.2878  | 0.0875  | -0.0534 | 0.0218  | -0.1848 | -0.7523 | -0.2941 |
| PBANKA_143660 | -0.6451 | -0.2862 | -0.6301 | -0.9272 | -0.6554 | -0.3001 | -0.2177 | -0.0666 | -0.5651 | 0.2887  | 0.6315  | 1.1658  |
| PBANKA_100900 | -0.009  | 0.3277  | 0.1132  | 0.8315  | 0.0919  | 0.1248  | -0.1382 | -0.1311 | -0.3784 | -0.044  | -0.507  | -0.372  |
| PBANKA_121970 | 0.6255  | 0.0408  | -0.1263 | 0.2327  | -0.0648 | 0.0922  | 0.0393  | 0.1995  | 0.4703  | 0.4783  | 0.2758  | -0.0863 |
| PBANKA_031230 | 0.2915  | -0.1823 | 0.2998  | 0.4017  | 0.8023  | 0.367   | 0.2497  | 0.4303  | 0.5911  | 0.087   | -0.2999 | -0.3581 |
| PBANKA_144260 | 0.7237  | 0.8001  | 0.6338  | 0.1513  | 0.4555  | 0.2578  | -0.1298 | 0.0014  | -0.109  | -0.1907 | -0.2229 | -0.0706 |
| PBANKA_021330 | -0.178  | -0.7473 | -1.2072 | -1.1146 | -0.8497 | -1.4796 | -1.2869 | -1.2602 | -1.6043 | -1.3955 | -0.8015 | -0.8904 |
| PBANKA_081150 | 0.4081  | 0.2615  | -0.0907 | -0.5709 | 0.3584  | 0.4139  | -0.2917 | -0.3027 | -0.1714 | -0.2074 | -0.7642 | -0.1265 |
| PBANKA_145390 | 0.0766  | -0.0253 | -0.3716 | -0.4134 | -0.0464 | 0.4545  | -0.0148 | -0.038  | 0.3014  | 0.4983  | 1.431   | 1.5427  |
| PBANKA_135540 | -0.177  | -0.1644 | -0.053  | -0.2231 | 0.009   | -0.0613 | 0.1548  | -0.2289 | -0.4642 | -0.3311 | -0.4005 | -0.4901 |

|               |         |         |         |         |         |         |         |         |         |         |         |         |
|---------------|---------|---------|---------|---------|---------|---------|---------|---------|---------|---------|---------|---------|
| PBANKA_131510 | 0.083   | -0.0238 | -0.0621 | -0.6813 | -0.1447 | -0.3419 | -0.0884 | -0.5167 | -0.3398 | -0.1282 | -0.3876 | -0.0687 |
| PBANKA_111040 | -0.2487 | 0.1123  | -0.2501 | -0.4564 | -0.1728 | -0.5994 | -0.0886 | -0.1227 | 0.2456  | 0.3951  | 0.126   | 0.4099  |
| PBANKA_020450 | -0.149  | 0.6653  | -0.1343 | -0.0129 | -0.0452 | -0.6855 | -0.1245 | 0.451   | 0.1049  | 0.7457  | 0.1072  | 0.8825  |
| PBANKA_060120 | -0.0646 | -0.2884 | -0.1433 | -0.2834 | -0.4747 | -0.4889 | -0.1182 | -0.1152 | 0.8853  | 0.3522  | 0.5076  | 0.6823  |
| PBANKA_124500 | 0.052   | 0.4299  | 0.1975  | -0.0261 | #####   | 0.3796  | -0.0349 | -0.389  | -0.0856 | -0.1788 | -0.073  | 0.0307  |
| PBANKA_101090 | -0.3753 | -0.0087 | -0.0889 | -0.386  | -0.0013 | 0.1127  | 0.161   | 0.2083  | -0.3253 | -0.1266 | -0.2271 | 0.2589  |
| PBANKA_135390 | 0.3936  | 0.2613  | -0.0115 | -0.0022 | -0.2052 | -0.6913 | 0.4014  | 0.1058  | 0.2019  | 0.2482  | 0.6085  | 0.8565  |
| PBANKA_041250 | -0.128  | -0.1851 | -0.2193 | 0.3134  | 0.0611  | 0.2631  | 0.0098  | 0.2829  | 0.3262  | 0.6462  | -0.1322 | -0.386  |
| PBANKA_070300 | 0.2396  | -0.0068 | 0.4468  | -0.0894 | -0.0924 | 1.2728  | 0.156   | 0.1256  | 0.3809  | 0.1617  | -0.0769 | 0.1966  |
| PBANKA_143430 | 0.1487  | -1.1419 | -0.2136 | -0.3338 | -0.9012 | 0.0826  | 0.1171  | -0.3197 | -0.0582 | 0.1543  | -0.0125 | 0.0734  |
| PBANKA_082630 | 1.2013  | -0.2915 | 0.5511  | 0.8827  | 0.4191  | 0.9038  | 0.2213  | -0.0098 | 0.0798  | -0.6107 | -0.0957 | -0.1058 |
| PBANKA_114180 | 0.1727  | 0.373   | 0.2486  | 0.2869  | 0.0998  | -0.1906 | -0.3329 | -0.2848 | -0.3822 | -0.4294 | -0.4993 | -0.3037 |
| PBANKA_071640 | -0.2357 | -0.6481 | -0.2025 | -0.1111 | -0.2199 | -0.5336 | 0.0362  | 0.247   | -0.2931 | 0.0632  | -0.0242 | 0.1796  |
| PBANKA_141280 | -0.1221 | -0.6932 | -0.1237 | 0.1569  | 0.0791  | -1.1599 | -0.1327 | 0.106   | -0.3464 | -0.224  | -0.3939 | -0.4663 |
| PBANKA_083080 | 0.3907  | 0.882   | 0.2882  | -0.0012 | -0.0467 | 0.4234  | -0.1944 | 0.6553  | -0.1186 | 0.0594  | 0.0745  | 0.3369  |
| PBANKA_041810 | -0.3395 | -0.3694 | -0.494  | -0.3822 | -0.1556 | -0.4178 | 0.3131  | 0.3079  | -0.2704 | 0.3437  | -0.0259 | 0.1182  |
| PBANKA_080690 | 0.6153  | 0.4966  | -0.0134 | 0.5826  | -0.0652 | 0.1582  | 0.166   | 0.2901  | -0.3871 | -0.0393 | 0.6582  | -0.0066 |
| PBANKA_100580 | 0.1076  | -0.032  | -0.0116 | 0.082   | -0.0873 | -0.3636 | 0.0806  | -0.1693 | 0.5524  | 0.8363  | 1.3328  | 0.3633  |
| PBANKA_124240 | -0.2689 | -0.1065 | -0.0783 | 0.0435  | 0.3504  | 0.0355  | 0.0315  | 0.1064  | -0.1369 | 0.075   | -0.0553 | -0.1167 |
| PBANKA_061060 | -0.1707 | 0.0795  | 0.2297  | -0.1245 | 0.0221  | 0.6244  | -0.1423 | 0.1786  | 0.2617  | -0.1638 | 0.0714  | 0.3972  |
| PBANKA_091310 | -0.0101 | 0.5196  | -0.2379 | -0.1683 | 0.1937  | -0.5316 | -0.1213 | -0.2481 | -0.1504 | -0.1903 | -0.312  | -0.3636 |
| PBANKA_103460 | 0.3113  | 0.0287  | 0.0962  | -0.2305 | -0.0889 | -0.154  | 0.3273  | 0.5543  | 0.2817  | 0.1905  | 0.0382  | 0.1618  |
| PBANKA_071000 | -0.1257 | -0.2411 | -0.0046 | 0.646   | 0.3229  | 0.3532  | 0.1709  | 0.1432  | 0.0611  | 0.129   | 0.133   | -0.4917 |
| PBANKA_091460 | 0.1489  | 0.2444  | 0.2288  | -0.0374 | 0.0444  | -0.2611 | 0.0924  | 0.3241  | 0.065   | 0.107   | -0.237  | -0.3442 |
| PBANKA_040740 | -0.2569 | 0.0147  | 0.022   | 0.38    | 0.0654  | 0.4744  | 0.3165  | 0.2648  | 0.233   | 0.3422  | 0.2948  | -0.0813 |
| PBANKA_103080 | 0.0111  | 1.212   | 0.0404  | 0.2342  | 0.0762  | -0.432  | 0.0454  | -0.4465 | 0.0073  | 0.1198  | 0.4072  | 0.4479  |
| PBANKA_040510 | 0.0479  | 0.2111  | 0.3175  | 0.4489  | 0.1586  | 0.8568  | 0.1435  | 0.0978  | 0.3454  | 0.257   | -0.0187 | -0.2861 |
| PBANKA_133470 | -0.3032 | 0.0347  | -0.0353 | -0.1231 | -0.0764 | -0.421  | 0.0663  | -0.1501 | 0.0601  | 0.2359  | 0.3017  | 1.0614  |
| PBANKA_062030 | -0.0698 | -0.6592 | 0.1211  | 0.1413  | 0.0059  | -0.1116 | 0.3062  | -0.1163 | 0.0665  | 0.409   | 0.3564  | 0.6947  |
| PBANKA_122410 | -0.0781 | -0.0861 | 0.0661  | -0.1752 | 0.1032  | 0.6797  | 0.147   | 0.1836  | 0.1498  | 0.1674  | 0.18    | 0.0034  |
| PBANKA_100340 | -0.0491 | -0.027  | -0.0575 | -0.547  | -0.3933 | -0.8881 | -0.3801 | -0.2433 | 0.2433  | 0.0617  | 0.0343  | -0.0886 |
| PBANKA_130070 | -0.0733 | -0.2371 | 0.2249  | -0.3457 | 0.0511  | 0.1044  | 0.0706  | 0.0974  | 0.5205  | 0.4565  | 0.2598  | 1.3204  |
| PBANKA_100290 | -0.3478 | -0.9848 | -0.1068 | 0.3997  | -0.1376 | 0.2346  | 0.3439  | 0.1885  | 0.5736  | 0.4397  | 0.5075  | 0.4982  |
| PBANKA_071130 | 0.1647  | -0.1458 | -0.3467 | -0.4565 | -0.2755 | -0.2083 | 0.1425  | 0.4139  | 0.3432  | 0.3723  | -0.2882 | 0.1607  |
| PBANKA_145910 | -0.1409 | 0.2452  | -0.0379 | -0.1704 | 0.0703  | -0.2797 | 0.0154  | 0.2973  | 0.2564  | 0.3768  | 0.1159  | 0.4174  |
| PBANKA_102670 | -0.2076 | -0.0077 | -0.07   | 0.3454  | 0.3234  | 0.6502  | 0.2007  | 0.1607  | 0.5112  | 0.3723  | 0.2597  | 0.491   |
| PBANKA_102540 | -0.1385 | -0.1541 | -0.1969 | -0.0715 | -0.1343 | 0.0872  | 0.2072  | 0.107   | 0.0923  | 0.2648  | 0.1508  | 0.0332  |
| PBANKA_060520 | 0.4825  | 0.8038  | 0.1502  | -0.0958 | 0.0275  | -0.0498 | 0.0278  | -0.1208 | -0.4446 | 0.3279  | 0.2065  | 0.2996  |
| PBANKA_130710 | -0.3857 | -0.1703 | -0.3975 | -0.6779 | -0.3301 | -0.6931 | -0.2434 | -0.4162 | -0.1101 | -0.4662 | -0.4351 | 0.0305  |
| PBANKA_144610 | -0.0356 | -0.7841 | -0.1613 | -0.133  | 0.2018  | -0.3586 | 0.0514  | 0.1603  | 0.1309  | 0.2057  | 0.4343  | 0.2287  |
| PBANKA_143990 | 0.1778  | 0.1087  | 0.0504  | 0.2875  | -0.021  | 0.0666  | 0.3106  | 0.2285  | 0.2142  | 0.088   | 0.1987  | 0.5835  |
| PBANKA_090950 | -0.2047 | -0.1304 | -0.257  | -0.5257 | -0.2008 | -0.4654 | -0.3013 | -0.0218 | 0.3659  | 0.2238  | 1.0872  | 0.288   |
| PBANKA_134520 | -0.2753 | -0.2132 | 0.0151  | 0.0757  | -0.1482 | 0.1417  | 0.4945  | 0.2569  | -0.2324 | -0.3236 | -1.0941 | -1.4155 |
| PBANKA_133280 | -0.2262 | -0.0044 | -0.2771 | -0.5912 | -0.2152 | -0.3752 | -0.0898 | -0.1142 | -0.5207 | -0.006  | -0.4205 | 0.2003  |
| PBANKA_091330 | -0.2443 | -0.2593 | -0.5048 | -0.7314 | -0.1889 | -0.9099 | -0.0034 | 0.3354  | -0.4878 | -0.2805 | -0.4731 | -0.5457 |
| PBANKA_120670 | -0.0784 | 0.4192  | -0.0214 | -0.309  | -0.54   | 0.1396  | -0.2493 | -0.129  | -0.1201 | -0.2001 | -0.3152 | 0.2395  |
| PBANKA_101360 | -0.1748 | -0.3422 | -0.1345 | -0.0267 | 0.1706  | 0.0782  | 0.1373  | -0.0742 | 0.0257  | 0.0334  | 0.1584  | 0.0167  |
| PBANKA_050310 | -0.3151 | -1.2823 | -0.2488 | -0.2343 | -0.1755 | -0.5887 | -0.3988 | -0.8065 | -0.3397 | -0.5113 | 0.4403  | -0.5227 |
| PBANKA_140930 | -0.0561 | 0.422   | 0.0007  | 0.0162  | -0.1884 | -0.284  | 0.0049  | -0.4239 | -1.0693 | -0.0521 | 0.1101  | 0.4443  |
| PBANKA_112470 | -0.3149 | 0.1716  | -0.0669 | -0.0299 | -0.315  | -0.7772 | -0.109  | 0.0318  | 0.2832  | 0.0062  | -0.3882 | 0.5328  |
| PBANKA_134880 | -0.3512 | -0.7037 | -0.4884 | -0.4211 | -0.3709 | -0.2997 | -0.4065 | -0.9265 | -0.159  | -0.0923 | 0.1189  | -0.0376 |
| PBANKA_071820 | 0.0788  | 0.4598  | 0.0226  | 0.0853  | -0.1131 | -0.0404 | 0.1997  | 0.4363  | 0.3166  | 0.2128  | 0.3988  | 0.0014  |
| PBANKA_031130 | -0.279  | 0.1606  | -0.1721 | 0.3171  | -0.1275 | 0.0388  | 0.0728  | 0.0645  | -0.3667 | -0.1393 | 0.5606  | 0.6979  |
| PBANKA_134250 | -0.284  | -0.4163 | -0.4082 | -0.2391 | -0.2848 | -1.0329 | -0.559  | 0.1394  | 0.7846  | 0.6575  | 0.9596  | 0.4905  |
| PBANKA_103440 | 0.3648  | 0.4487  | 0.6451  | 0.382   | 0.463   | 0.1026  | -0.6805 | -0.8109 | -1.0722 | -1.2331 | -0.8689 | -0.745  |
| PBANKA_050440 | -0.4285 | -0.2344 | -0.8461 | -0.8017 | -0.2867 | -0.7239 | -0.2364 | -0.5481 | -0.4183 | 0.1311  | -0.8944 | 0.8362  |
| PBANKA_011220 | -1.0683 | -0.7803 | -1.1786 | -1.0148 | -1.1245 | 0.0261  | 0.0743  | 0.5171  | 1.1004  | 1.2507  | 1.4443  | 0.8381  |
| PBANKA_110630 | 0.3654  | 0.6871  | -0.0468 | -0.2968 | 0.2782  | -0.2329 | -0.0178 | 0.0554  | -0.0594 | -0.2584 | 0.2825  | 0.4958  |
| PBANKA_030620 | 0.1541  | -0.0791 | 0.1771  | 0.3666  | 0.2539  | 0.1045  | -0.0986 | 0.0715  | 0.3488  | 0.2424  | 0.2545  | 0.1687  |
| PBANKA_135490 | 0.3057  | 0.3636  | -0.3773 | -0.1164 | -0.2214 | -0.2156 | -0.1954 | -0.3559 | 0.1726  | 0.2957  | 0.8867  | 0.9421  |
| PBANKA_093830 | -0.0769 | 0.4725  | 0.0485  | 0.1402  | 0.0988  | 0.284   | 0.0327  | 0.2477  | -0.1606 | -0.2636 | -0.1861 | -0.9781 |
| PBANKA_113980 | -0.0928 | -0.4524 | 0.3582  | 0.1409  | 0.1213  | -1.2268 | 0.2118  | 0.1237  | 0.6805  | 0.6024  | 0.6655  | 1.4852  |
| PBANKA_061700 | 0.0499  | 0.1972  | -0.0065 | 0.028   | 0.0687  | -0.4996 | 0.1152  | -0.1141 | 0.1442  | 0.3844  | 0.7126  | 0.6473  |

|               |         |         |         |         |         |         |         |         |         |         |         |         |
|---------------|---------|---------|---------|---------|---------|---------|---------|---------|---------|---------|---------|---------|
| PBANKA_040200 | -0.2237 | -0.2948 | 0.0482  | -0.2268 | 0.0088  | -0.0276 | 0.0186  | -0.0514 | 0.0551  | 0.1144  | -0.3449 | -0.1506 |
| PBANKA_090610 | 0.2272  | -1.1782 | -0.0181 | 0.0741  | 0.0721  | 0.068   | 0.0221  | 0.233   | 0.4322  | 0.4682  | 0.2838  | 0.0042  |
| PBANKA_050650 | -0.024  | -0.3681 | -0.202  | -0.1354 | 0.4517  | -0.0912 | -0.0104 | -0.5456 | -0.384  | -0.3666 | -0.5111 | -0.5693 |
| PBANKA_050860 | -0.0384 | -0.8125 | 0.7999  | 0.3418  | 0.1738  | 0.4155  | 0.2743  | 0.3053  | 0.2157  | 0.3147  | 0.2466  | 0.1625  |
| PBANKA_112100 | -0.3425 | -0.1324 | -0.3011 | -0.4059 | -0.1291 | -0.2865 | 0.0448  | 0.0446  | 0.4812  | 0.422   | 0.2929  | 0.6981  |
| PBANKA_052210 | 0.3815  | -0.7145 | 0.3039  | 0.1051  | -0.2732 | -1.0734 | 0.2689  | -1.8022 | -0.4456 | 0.1611  | -0.1747 | -0.32   |
| PBANKA_093900 | -0.0458 | 0.0994  | -0.1341 | -0.5099 | -0.3059 | -0.2911 | -0.2659 | -0.0023 | 0.4379  | 0.4304  | 0.7797  | 0.2106  |
| PBANKA_082550 | -0.1494 | -0.0186 | -0.3152 | 0.4728  | 0.2565  | 1.0068  | 0.1998  | 0.3123  | 0.4625  | 0.5612  | 0.6167  | 1.0067  |
| PBANKA_041760 | -0.1415 | -0.4929 | -0.2974 | -0.325  | 0.0823  | -0.1613 | -0.5829 | -0.4033 | -0.1372 | 0.131   | -0.0552 | 0.7952  |
| PBANKA_050280 | -0.0518 | 0.5282  | 0.2419  | -0.0914 | -0.2395 | -0.1525 | -0.3264 | 0.0199  | -0.135  | 0.0185  | 0.5459  | 1.0026  |
| PBANKA_103360 | 0.0372  | -2.2301 | 0.088   | 0.2186  | 0.2887  | 0.1215  | -0.0454 | -0.3743 | -0.1937 | -0.0789 | -0.0783 | 0.5012  |
| PBANKA_131220 | 0.3007  | 0.3576  | 0.5223  | 0.4683  | 0.256   | 0.4398  | 0.2796  | -0.1319 | -0.31   | -0.7846 | -0.3697 | -0.7712 |
| PBANKA_101110 | 0.6052  | 0.8538  | 0.5811  | 0.1268  | 0.715   | 0.7225  | 0.0599  | 0.1575  | 0.6335  | 0.7904  | 1.8835  | 0.8182  |
| PBANKA_113560 | 0.1067  | -1.0101 | -0.4789 | -0.074  | 0.1267  | -0.4179 | -0.3166 | -0.4837 | -0.6003 | -0.3663 | -0.6688 | -0.2438 |
| PBANKA_136190 | 0.0418  | -0.4762 | 0.15    | 0.3488  | 0.354   | 0.556   | 0.4322  | 0.1276  | 0.1997  | -0.4802 | -0.5308 | -0.7768 |
| PBANKA_110290 | 0.0404  | 0.0111  | -0.2421 | -0.0487 | 0.348   | -0.428  | 0.1936  | 0.6109  | 0.0236  | 0.5068  | -0.3429 | -0.2534 |
| PBANKA_051350 | 0.5875  | 0.1092  | 0.2356  | 0.3364  | 0.1404  | -0.5989 | -0.152  | 0.4051  | 0.4024  | 0.0079  | -0.1953 | 0.1984  |
| PBANKA_071430 | -0.1808 | -0.3711 | -0.3691 | -1.6283 | -0.9826 | -0.7891 | -0.2634 | -0.1444 | -0.5291 | -0.6807 | -0.237  | 0.2095  |
| PBANKA_081940 | 0.2953  | -0.8206 | -0.0785 | 0.0068  | 0.0721  | -0.0727 | 0.098   | -0.0748 | -0.2946 | -0.0868 | -0.0689 | -0.2786 |
| PBANKA_114220 | 0.2967  | 0.3153  | 0.209   | 0.2979  | 0.1023  | 0.3716  | -0.1868 | -0.2647 | -0.077  | -0.0898 | 0.3548  | 0.1172  |
| PBANKA_141870 | -0.0846 | -0.6858 | -0.3371 | 0.2342  | 0.3939  | -0.2279 | 0.2099  | -0.2661 | -0.203  | -0.3053 | -0.1476 | -0.6141 |
| PBANKA_050130 | -0.3895 | -0.0777 | -0.0536 | -0.2111 | 0.3349  | 0.5511  | 0.1493  | 0.0245  | -0.0296 | -0.1872 | 0.0129  | 0.0114  |
| PBANKA_103530 | -0.1242 | 0.6622  | 0.2028  | 0.2416  | 0.2595  | 0.2339  | -0.3627 | -0.3994 | -0.3387 | -0.3954 | -0.2387 | -0.7015 |
| PBANKA_092690 | 0.1107  | -0.1724 | 0.1881  | 0.0151  | 0.2906  | 0.3645  | 0.2222  | 0.3555  | 0.5274  | 0.5086  | 0.3683  | 0.1812  |
| PBANKA_130080 | -0.2261 | -0.4059 | 0.0114  | -0.309  | 0.1151  | -0.3391 | 0.0233  | 0.1477  | -0.0012 | 0.1219  | 0.3414  | 0.0094  |
| PBANKA_135340 | 0.0185  | -0.4601 | 0.4644  | 0.3427  | -0.0323 | 0.6918  | 0.1893  | -0.0578 | -0.0879 | -0.1203 | 0.2175  | 0.0959  |
| PBANKA_010420 | 0.0648  | -0.4501 | -0.1158 | 0.4862  | -0.0215 | -1.4694 | -0.5838 | 0.5402  | 0.9954  | 0.9656  | 0.4285  | 1.7156  |
| PBANKA_041730 | -0.185  | -0.3026 | -0.3621 | -0.6762 | -0.2314 | -0.5839 | -0.366  | -0.4859 | -0.4807 | -0.4844 | -0.7206 | -0.4698 |
| PBANKA_133040 | 0.3915  | 0.4285  | 0.2324  | 1.0435  | 0.0569  | 0.4951  | -0.1837 | -0.0005 | -0.0667 | -0.2577 | -0.2431 | -0.3459 |
| PBANKA_100990 | -0.5201 | -0.004  | -0.7503 | -0.5877 | -0.3482 | -0.8098 | -0.6308 | -0.2919 | 0.2734  | 0.2707  | 1.0702  | 1.3957  |
| PBANKA_010250 | 0.4875  | -0.5345 | -0.1241 | 0.2603  | 0.1965  | 0.3838  | -0.4131 | -0.0446 | -0.1955 | -0.7541 | -0.8895 | -0.2996 |
| PBANKA_103190 | 0.439   | 0.6956  | 0.2611  | 0.1138  | 0.1153  | -0.4335 | -0.3477 | -0.4515 | -0.7965 | -0.7828 | -0.3663 | -0.3427 |
| PBANKA_081550 | 0.228   | 0.0804  | 0.6106  | -0.1709 | 0.2372  | -0.9102 | 0.0439  | 0.2102  | 0.4024  | 0.0483  | 0.8676  | -0.1896 |
| PBANKA_060800 | -0.4812 | -0.2465 | -0.1055 | -0.34   | -0.191  | 0.3222  | 0.0662  | 0.0826  | 0.1952  | -0.0416 | 0.3958  | 0.0758  |
| PBANKA_102910 | 0.5483  | -0.1504 | 0.0473  | -0.0467 | 0.6784  | 1.0591  | 0.9045  | 0.8651  | 0.8154  | 0.1256  | -0.1214 | -0.0194 |
| PBANKA_146100 | 0.0438  | 0.8644  | -0.0071 | 0.0833  | 0.0668  | -0.1946 | -0.5146 | -0.2946 | -0.1414 | -0.1214 | -0.3506 | -0.0692 |
| PBANKA_090040 | 0.2517  | 0.9381  | 0.3519  | 0.1685  | -0.7647 | 0.5772  | 0.0992  | 0.1267  | -0.1228 | 0.1298  | 0.1801  | 0.7536  |
| PBANKA_135790 | -0.5742 | -0.1428 | -0.6729 | -0.8772 | -0.8298 | -0.8005 | -0.4666 | -1.0157 | -0.545  | -0.2459 | 0.2569  | 0.4132  |
| PBANKA_082380 | -0.321  | -0.4252 | 0.0349  | -0.4443 | -0.1597 | 0.4962  | 0.374   | -0.3154 | 0.507   | -0.5117 | -0.6989 | -0.3949 |
| PBANKA_021360 | 0.0627  | 0.3453  | -0.201  | -0.7131 | -0.6734 | -0.8509 | -0.3429 | 0.1497  | 0.0181  | -0.1771 | -0.5167 | -0.1586 |
| PBANKA_144130 | 0.3835  | 0.7322  | 0.1968  | -0.081  | 0.1112  | -1.4484 | 0.0323  | 0.1931  | 0.0661  | 0.1459  | 0.2469  | -0.0376 |
| PBANKA_092920 | -0.1631 | -0.1345 | -0.571  | -0.231  | -0.3027 | -0.3043 | 0.3279  | 0.4385  | 0.8471  | 0.8458  | 0.3787  | 0.8373  |
| PBANKA_020920 | -0.3716 | 0.5512  | 0.121   | -0.0446 | 0.4226  | -0.2525 | -0.1351 | -0.3325 | -0.4631 | -0.4442 | -0.364  | -0.8289 |
| PBANKA_135740 | 0.0096  | -0.1121 | -0.1151 | 0.5462  | -0.043  | 0.0219  | 0.0926  | -0.2459 | -0.1813 | -0.295  | -0.4244 | -0.8476 |
| PBANKA_132580 | 0.3458  | 0.6091  | 0.0571  | -0.1536 | 0.2531  | 0.1744  | 0.0259  | 0.2386  | 0.3758  | 0.196   | -0.0148 | 0.7307  |
| PBANKA_031400 | 0.4479  | 0.4263  | 0.0084  | 0.2949  | 0.1341  | 0.3049  | -0.2383 | -0.6466 | -0.2089 | -0.3918 | -0.7499 | -0.0115 |
| PBANKA_041340 | -0.5005 | 0.1108  | -0.2821 | -0.2815 | -0.0059 | -0.2714 | -0.4906 | -0.4493 | -0.3223 | 0.027   | -0.0219 | 0.3861  |
| PBANKA_111510 | -0.4334 | -0.5145 | -0.4203 | 0.0852  | 0.564   | 0.6769  | 0.4937  | 0.8148  | 0.579   | 0.2729  | 0.1724  | -1.0129 |
| berg12_28S    | 0.1807  | 0.5307  | 0.1575  | -0.6632 | 0.1869  | -0.4439 | -0.5343 | -0.0996 | -0.2406 | 0.8433  | 1.3272  | 0.8436  |
| PBANKA_090540 | 0.1868  | 0.4707  | -0.0172 | -0.1536 | -0.0232 | -0.1053 | 0.3726  | 0.4528  | 0.6984  | 0.6356  | 1.0687  | 0.8137  |
| PBANKA_132420 | 0.0388  | 0.1978  | -0.0515 | -0.0712 | 0.2499  | 0.1947  | 0.1838  | 0.1328  | 0.4244  | 0.1972  | 0.5195  | 0.2081  |
| PBANKA_114360 | -0.0034 | 1.3527  | -0.1705 | 0.0272  | -0.0969 | -0.4877 | -0.1766 | -0.2644 | -0.1229 | -0.1671 | 0.2639  | 0.4775  |
| PBANKA_110410 | -0.0989 | -0.2249 | -0.0635 | -0.1493 | -0.0973 | -0.0302 | 0.1316  | 0.1413  | 0.5744  | 0.2453  | 0.928   | 0.8497  |
| PBANKA_132010 | -0.1379 | -0.1028 | -0.3119 | -0.4574 | -0.2544 | -1.4873 | -0.1375 | 0.3506  | 0.7488  | 0.4418  | 0.9543  | 0.8289  |
| PBANKA_146260 | -0.0388 | -1.5044 | 0.2095  | 0.2913  | -0.2135 | -0.6112 | 0.2928  | -0.1824 | -0.42   | 0.0922  | -0.4719 | -0.2986 |
| PBANKA_100800 | 0.1541  | -0.1116 | -0.297  | 0.2365  | 0.009   | 0.5861  | -0.1952 | -0.3997 | -0.1067 | -0.1961 | 0.355   | -0.4127 |
| PBANKA_102310 | -0.5004 | -0.5473 | -0.1246 | -0.4021 | -0.0245 | -0.4588 | -0.3649 | -1.0316 | -0.4938 | -0.6214 | -0.8946 | -0.7059 |
| PBANKA_145090 | 0.2264  | 0.293   | 0.1303  | -0.0301 | -0.4809 | 0.773   | 0.1768  | -0.0967 | -0.1305 | -0.1997 | -0.0555 | -0.2456 |
| PBANKA_113760 | -0.0251 | -0.8015 | -0.4206 | -0.0893 | 0.0154  | 0.2718  | 0.486   | 0.1685  | 0.2536  | 0.1322  | -0.2454 | -0.4034 |
| PBANKA_082470 | -0.0641 | 0.3356  | -0.0188 | 0.4313  | -0.1536 | 0.1201  | 0.0152  | 0.085   | -0.3771 | -0.1298 | 0.5706  | -0.0495 |
| PBANKA_050670 | -0.253  | 0.2403  | -0.4885 | -0.4252 | -0.1968 | 0.0131  | -0.3715 | -0.4037 | -0.4178 | -0.5158 | 0.047   | 0.0575  |
| PBANKA_060880 | -0.5227 | -0.2962 | -0.5061 | 0.3759  | 0.3663  | 0.6128  | 0.6919  | 0.2482  | 0.9085  | 0.4506  | 0.2889  | -0.01   |
| PBANKA_082560 | -0.2417 | 0.6376  | -0.1514 | -0.0422 | 0.1425  | -0.0034 | -0.155  | -0.0668 | 0.0796  | 0.0678  | 0.061   | 1.1289  |

|               |         |         |         |         |         |         |         |         |         |         |         |         |
|---------------|---------|---------|---------|---------|---------|---------|---------|---------|---------|---------|---------|---------|
| PBANKA_114620 | 0.0128  | 0.0716  | -0.0637 | 0.4087  | 0.0772  | 0.7522  | -0.21   | 0.4877  | 0.3108  | -0.0005 | 0.2439  | 0.6062  |
| PBANKA_050950 | -0.5517 | 0.5543  | 0.4562  | -0.4396 | -0.1507 | 0.4991  | 0.3671  | 0.0064  | -0.2031 | -0.2477 | -0.981  | 0.2704  |
| PBANKA_111850 | 0.1919  | 0.2649  | 0.1029  | -0.3492 | 0.0058  | 0.1915  | 0.0386  | 0.11    | 0.0979  | 0.1779  | -0.0866 | 0.0188  |
| PBANKA_134370 | -0.3314 | -0.1523 | -0.4292 | 0.345   | -0.3189 | -0.1527 | 0.5845  | 0.1882  | 0.4407  | 0.5772  | 0.2253  | 0.3653  |
| PBANKA_083180 | -0.4811 | 0.2281  | 0.0141  | -0.1087 | -0.2283 | -0.127  | 0.1362  | -0.2808 | -0.033  | 0.2953  | 0.3143  | 1.1302  |
| PBANKA_050350 | -0.2203 | 0.0024  | -0.2042 | 0.0231  | -0.1625 | -0.1114 | -0.1509 | -0.0426 | 0.3355  | 0.7839  | 0.8595  | 0.8201  |
| PBANKA_010080 | 0.1977  | -0.7437 | 0.298   | -0.7213 | 0.2764  | -0.2425 | 0.0387  | 0.4299  | 0.4552  | 0.4072  | 1.2826  | 1.0126  |
| PBANKA_090900 | -0.336  | -0.354  | -0.3032 | 0.1946  | -0.321  | -0.9767 | -0.1678 | 0.3571  | -0.1805 | -0.4305 | -0.1369 | -0.3282 |
| PBANKA_141320 | 0.1802  | 0.1432  | 0.2357  | 0.4803  | 0.3578  | 0.0681  | 0.0463  | -0.0555 | 0.4599  | -0.0022 | 0.1564  | -0.1207 |
| PBANKA_145110 | -0.2269 | -0.253  | -0.5038 | 0.0961  | -0.0648 | -0.2656 | -0.2259 | 0.0228  | 0.6759  | 0.6102  | 0.5519  | 1.5552  |
| PBANKA_142890 | 0.7072  | 1.1762  | 0.813   | 0.1817  | 0.7286  | 0.2939  | -0.3222 | 0.0649  | -0.3637 | -0.4429 | -0.7957 | -0.1409 |
| PBANKA_103000 | 0.1521  | 0.6751  | -0.0876 | 0.3266  | 0.292   | -0.1946 | -0.2975 | -0.5181 | -0.7626 | -0.6727 | -0.2023 | 0.1123  |
| PBANKA_041580 | 0.0327  | -0.5385 | -0.1035 | 0.2166  | -0.1354 | 0.0404  | 0.1568  | -0.5382 | 0.8532  | 0.4619  | 0.1809  | 0.4107  |
| PBANKA_011030 | -0.7267 | -0.2959 | -0.419  | 0.2818  | 0.2701  | 0.2521  | 0.7068  | 0.3422  | 0.5215  | 0.5578  | 0.0422  | -0.2135 |
| PBANKA_142590 | -0.504  | 0.1658  | -0.4165 | -0.1166 | -0.0097 | -0.6908 | 0.2495  | 0.4927  | 0.3605  | 0.4903  | 0.2763  | 0.627   |
| PBANKA_142170 | -0.6373 | -0.1215 | -0.1701 | -0.1064 | -0.4514 | -0.3678 | -0.5554 | 0.0947  | 0.5043  | 0.574   | 1.2531  | 1.1824  |
| PBANKA_020430 | -0.1045 | 0.1374  | 0.1008  | 0.0135  | 0.332   | 0.6387  | 0.0054  | 0.1352  | 0.3599  | 0.1237  | 0.1265  | 0.366   |
| PBANKA_113490 | 0.0294  | -0.6583 | -0.2096 | 0.0896  | -0.1412 | -0.2092 | -0.0967 | 0.0171  | 0.2935  | 0.375   | 1.0299  | 0.8274  |
| PBANKA_122760 | -0.1794 | -0.1694 | -0.1946 | -0.1405 | -0.3374 | -0.0617 | -0.0637 | 0.367   | 0.113   | 0.6754  | 0.4334  | -0.4232 |
| PBANKA_082760 | -1.1051 | -0.8482 | -1.6691 | -2.2145 | -0.5192 | -1.2325 | -1.0076 | -1.2263 | -1.4065 | -1.7878 | -0.9859 | -0.6329 |
| PBANKA_142630 | 0.3615  | 0.6006  | -0.0086 | -0.0588 | 0.0832  | -0.0194 | 0.0962  | 0.0194  | -0.1052 | -0.0603 | 0.157   | 0.0523  |
| PBANKA_113590 | -0.2698 | 0.0279  | 0.1062  | -0.5367 | -0.3846 | 0.5511  | 0.2625  | 0.4004  | 0.0373  | 0.2526  | -0.3424 | 0.3083  |
| PBANKA_021160 | -0.0175 | 0.4247  | -0.0449 | 0.0158  | 0.8123  | -1.062  | 0.175   | -0.0365 | -0.0011 | -0.1965 | -0.5252 | -0.0597 |
| PBANKA_120070 | -0.2323 | -0.1876 | -0.0477 | -0.0147 | 0.3371  | -0.0388 | -0.0659 | -0.1009 | -0.0719 | -0.663  | -0.4993 | -0.3545 |
| PBANKA_113460 | -0.0617 | -0.1356 | -0.5103 | -0.5467 | -0.2554 | -0.3307 | -0.0652 | 0.2411  | 0.3143  | 0.1288  | -1.0193 | -1.007  |
| PBANKA_082720 | -0.5836 | -0.2361 | -0.1835 | -0.4088 | -0.3798 | 0.3213  | 0.3785  | 0.3773  | 0.1404  | 0.2053  | -0.0184 | 0.0498  |
| PBANKA_103790 | -0.135  | -0.2826 | -0.2551 | -0.0761 | 0.0395  | -0.2216 | -0.1118 | 0.0951  | 0.7947  | 0.673   | 1.148   | 0.7087  |
| PBANKA_080770 | 0.111   | -0.0238 | -0.2751 | -0.3713 | 0.2497  | 0.364   | -0.0065 | 0.4272  | 0.3517  | 0.2942  | 0.1944  | -0.3152 |
| PBANKA_120810 | 0.889   | -0.0729 | 0.4566  | 0.4708  | 0.2585  | 0.8588  | 0.1736  | -0.3519 | -0.0357 | -1.4865 | -0.5507 | -0.278  |
| PBANKA_020250 | -0.2622 | -0.8217 | 0.0552  | 0.1085  | 0.6667  | 0.5252  | 0.5489  | -0.0693 | 0.5056  | 0.0677  | -0.3579 | 0.1312  |
| PBANKA_130410 | -0.2123 | -0.196  | 0.0819  | 0.2234  | 0.1391  | 0.3697  | 0.0844  | 0.8965  | 0.5863  | 0.4093  | -0.0174 | -0.2684 |
| PBANKA_040170 | 0.2218  | 0.6049  | 0.1413  | -0.1414 | -0.2116 | -0.2228 | -0.0571 | -0.036  | -0.201  | -0.0343 | 0.4806  | 0.7827  |
| PBANKA_124300 | -0.3546 | -0.0481 | -0.2624 | -0.3921 | -0.198  | -0.4689 | 0.0246  | 0.5663  | 0.6263  | 0.527   | -0.3352 | 0.3015  |
| PBANKA_134360 | 0.5136  | 0.4395  | 0.0706  | -0.1411 | 0.4177  | -0.8136 | -0.2166 | -0.936  | -0.5718 | -0.335  | -0.0861 | -0.0867 |
| PBANKA_140430 | -0.0041 | -0.661  | -0.0591 | 0.0753  | -0.0056 | -0.2458 | -0.329  | 0.2869  | 0.4325  | 0.41    | 0.1554  | 1.6893  |
| PBANKA_061730 | 0.0278  | 0.2399  | -0.1703 | -0.1409 | 0.0169  | -0.0603 | 0.6693  | 0.5915  | 0.4339  | -0.1814 | -0.5758 | -0.7864 |
| PBANKA_040290 | 0.0978  | 0.4101  | -0.2766 | 0.4093  | -0.1827 | 0.079   | -0.2267 | -0.3875 | -0.1059 | -0.2524 | 0.317   | 0.149   |
| PBANKA_050300 | 0.3141  | 0.2294  | 0.1883  | 0.309   | 0.4909  | 0.4209  | 0.1804  | 0.0444  | 0.1195  | 0.1458  | 0.4031  | 1.2229  |
| PBANKA_140130 | 0.364   | 0.2727  | 0.5823  | 0.5476  | 0.3572  | 0.3527  | -0.6829 | -0.8572 | -0.8895 | -0.688  | -1.2138 | -0.2268 |
| PBANKA_050210 | -0.098  | 0.3559  | 0.0521  | 0.1212  | -0.3076 | -0.9508 | -0.5899 | -0.4436 | -0.6928 | -0.3782 | -0.0847 | -0.3003 |
| PBANKA_103870 | -0.0443 | -0.0356 | -0.0698 | -1.008  | -0.4766 | -1.2759 | -0.3147 | 0.1536  | 0.1679  | 0.4809  | -0.2951 | 0.3023  |
| PBANKA_082320 | 0.2211  | -0.1738 | 0.2714  | 0.4421  | -0.0373 | -0.2612 | -0.1892 | -0.1364 | 0.1875  | 0.2448  | 0.8431  | 1.9813  |
| PBANKA_121720 | -0.1354 | -1.2314 | -0.3991 | -0.4255 | 0.582   | -0.0801 | -0.0356 | 0.4879  | 0.8933  | 0.3129  | 0.1735  | -0.1626 |
| PBANKA_134470 | -0.3195 | -0.0204 | -0.2191 | -0.0433 | 0.0689  | 0.4696  | 0.1463  | 0.1842  | 0.6963  | 0.7789  | 0.5573  | 0.8475  |
| PBANKA_020530 | 0.0512  | 0.7992  | 0.4419  | -0.157  | -0.0049 | 0.5782  | 0.1111  | 0.1529  | -0.2307 | -0.3383 | -0.2141 | -0.6724 |
| PBANKA_040560 | -0.3644 | -3.0052 | -0.398  | -0.0946 | -0.1908 | -0.2459 | 0.0415  | 0.3186  | 0.2558  | 0.3721  | 0.8452  | 0.0966  |
| PBANKA_122320 | -1.0696 | -0.2775 | -0.336  | -0.2942 | -0.2556 | -0.2776 | 0.1495  | -0.2366 | -0.3976 | -0.5501 | -0.8098 | -0.3154 |
| PBANKA_100750 | 0.2198  | 0.5059  | -0.416  | -0.463  | -0.2212 | -1.2239 | -1.0525 | -0.4915 | -0.1849 | 0.5508  | 1.3317  | 1.455   |
| PBANKA_134090 | -0.0194 | 0.3507  | 0.2506  | -0.0879 | 0.077   | 0.1827  | 0.314   | 0.498   | 0.4091  | 0.1054  | 0.0416  | 0.6889  |
| PBANKA_093150 | -0.7884 | -0.3164 | -0.3957 | -0.2527 | 0.1416  | 0.2339  | 0.1731  | 0.1281  | 0.4176  | 0.16    | 0.3644  | -0.0157 |
| PBANKA_133840 | 0.5042  | 0.2674  | 0.2087  | 0.093   | -0.058  | 0.1134  | -0.1813 | -0.222  | -1.1723 | -0.7194 | -0.7406 | -0.9506 |
| PBANKA_144040 | 0.2024  | 0.2047  | -0.1956 | 0.263   | -0.0854 | -0.0759 | -0.0029 | -0.0536 | 0.1617  | 0.2656  | -0.0788 | 0.5584  |
| PBANKA_145140 | 0.4451  | 0.602   | 0.4855  | 0.8529  | 0.3971  | 0.3578  | 0.2692  | -0.172  | -0.2993 | -0.2951 | -0.4242 | -0.122  |
| PBANKA_120940 | -0.3559 | -0.4524 | -0.3134 | -0.3296 | -0.1152 | -0.2243 | 0.2296  | 0.366   | 0.7904  | 0.7489  | 0.215   | 1.8008  |
| PBANKA_140420 | -0.1665 | 0.3203  | 0.0959  | 0.0221  | -0.2561 | -0.9406 | 0.0504  | -0.2992 | -0.2654 | 0.3158  | 0.8283  | -0.1576 |
| PBANKA_083420 | 0.1677  | -0.0533 | 0.2115  | 0.9936  | 0.6158  | 0.3     | 0.4966  | 0.725   | 0.059   | -0.3567 | -0.2368 | -0.1868 |
| PBANKA_114350 | 0.2099  | 0.2167  | -0.2839 | -0.2599 | -0.1503 | -1.1135 | -0.5185 | -0.1225 | -0.2479 | 0.516   | 1.2783  | 1.705   |
| PBANKA_103860 | -0.2642 | -0.0569 | 0.069   | 0.4544  | -0.2263 | -0.5968 | -0.0267 | 0.2632  | 0.3933  | 0.4822  | 0.3281  | 0.8667  |
| PBANKA_100210 | -0.5172 | 0.218   | -0.5233 | -0.5557 | -0.3147 | -0.0302 | 0.2237  | -0.196  | 0.1197  | 0.3305  | 0.7054  | 0.3232  |
| PBANKA_135530 | 0.2751  | 0.4426  | -0.0043 | -0.03   | -0.0204 | -0.4677 | 0.0684  | -0.0704 | -0.1567 | 0.0269  | 0.0665  | -0.2311 |
| PBANKA_132710 | -0.3282 | -0.1283 | -0.4682 | -0.1656 | 0.2705  | -0.0137 | 0.1513  | 0.296   | 0.4108  | 0.8181  | 0.5174  | 0.0016  |
| PBANKA_081570 | -0.199  | 0.0067  | -0.063  | 0.1091  | 0.2327  | -0.0262 | -0.004  | -0.1471 | 0.2152  | 0.2985  | -0.2166 | 0.9367  |
| PBANKA_121910 | -0.1192 | 0.0641  | 0.0261  | 0.2371  | -0.1111 | 0.4024  | -0.1478 | -0.2568 | 0.2023  | 0.508   | 1.1791  | 1.834   |



|               |         |         |         |         |         |         |         |         |         |         |         |         |
|---------------|---------|---------|---------|---------|---------|---------|---------|---------|---------|---------|---------|---------|
| PBANKA_111460 | 0.085   | 0.0614  | -0.0283 | -0.5257 | -0.0708 | -0.3557 | 0.0537  | 0.1188  | -0.2223 | -0.1532 | 0.8474  | 0.2095  |
| PBANKA_101830 | -0.4641 | -0.6004 | -1.4072 | -1.5059 | -1.3925 | -0.8835 | -0.5606 | -1.4398 | -1.0182 | -0.7887 | 0.017   | -0.8334 |
| PBANKA_136150 | 0.3218  | 0.55    | 0.1426  | -0.1928 | 0.0534  | 0.5094  | -0.521  | -0.2529 | -0.2134 | 0.0879  | -0.0704 | 0.4475  |
| PBANKA_133260 | 0.3986  | 0.1164  | 0.6401  | 0.4125  | 0.2622  | 0.4273  | -0.7418 | -0.3333 | -0.2788 | -0.9477 | -0.9063 | -0.1521 |
| PBANKA_082980 | 0.0277  | -0.728  | 0.1842  | 0.5463  | 0.2106  | 0.5061  | 0.5571  | 0.2814  | 0.2643  | -0.318  | -0.6455 | -0.0327 |
| PBANKA_040250 | -0.608  | -0.6265 | -0.7075 | -0.0074 | -0.3951 | -0.3287 | -0.2243 | 0.176   | 0.9362  | 0.8786  | 0.6467  | 1.6587  |
| PBANKA_081770 | 0.7385  | 0.45    | 0.0278  | -0.3843 | -0.028  | -0.2273 | -0.8082 | -0.6908 | -0.592  | 0.0666  | 0.9856  | 1.7634  |
| PBANKA_120600 | 0.5674  | 0.6814  | 0.4347  | -0.0117 | 0.3414  | -0.099  | -0.2959 | -0.2292 | 0.3939  | 0.1192  | 0.1107  | 0.4278  |
| PBANKA_071690 | -1.3977 | -0.4688 | -1.1849 | -0.4812 | -0.7231 | -0.2291 | 0.162   | 0.4811  | 1.0072  | 1.4181  | 1.2815  | 0.9677  |
| PBANKA_130430 | -0.0935 | -0.2901 | -0.0418 | -0.9982 | 0.041   | 0.2957  | 0.6938  | 0.6529  | 0.4345  | 0.6597  | 0.0677  | -0.0759 |
| PBANKA_100100 | 0.045   | 0.4379  | 0.019   | -0.0896 | 0.0254  | -0.2055 | -0.1455 | 0.2499  | 0.1087  | 0.2777  | 0.0634  | -0.5572 |
| PBANKA_121000 | 0.0155  | 0.1962  | 0.1884  | 0.3043  | 0.0665  | 0.4252  | -0.1105 | 0.0419  | -0.0433 | -0.2443 | -0.1516 | 0.0275  |
| PBANKA_146010 | -0.3924 | -0.2038 | 0.1883  | 0.2041  | 0.3893  | 0.1432  | 0.347   | 0.112   | 0.0342  | -0.5226 | -0.5353 | 0.1766  |
| PBANKA_093370 | -0.6261 | -0.8484 | -0.4108 | -0.1456 | -0.2584 | -0.6367 | 0.1354  | 0.2393  | 0.4576  | 0.2912  | -0.0671 | 0.1772  |
| PBANKA_142710 | 0.1792  | -0.0809 | -0.2434 | -0.462  | -0.0646 | -0.1322 | -0.1861 | -0.5764 | -0.9376 | -0.8634 | -0.9084 | -0.8502 |
| PBANKA_090480 | -0.0017 | -0.0705 | -0.0486 | 0.4199  | -0.1154 | 0.2368  | -0.1587 | 0.098   | 0.4075  | 0.4957  | -0.5061 | 0.539   |
| PBANKA_111640 | 0.3699  | 0.5939  | 0.1817  | -0.0907 | -0.4821 | 0.3109  | 0.2717  | 0.168   | 0.3152  | 0.015   | 0.1228  | 0.0071  |
| PBANKA_100950 | -0.2505 | 0.4584  | -0.0843 | -0.2732 | 0.0271  | -0.7738 | -0.06   | 0.4393  | 0.1171  | 0.3529  | 0.3392  | 0.2357  |
| PBANKA_130270 | -0.2987 | -0.2423 | -0.5098 | 0.7433  | -0.0931 | -0.528  | 0.0564  | -0.2703 | -0.6641 | -0.0797 | -0.1903 | -0.3059 |
| PBANKA_112940 | -0.1226 | 0.4833  | 0.335   | 0.1373  | 0.0647  | 0.2829  | 0.2318  | 0.245   | 0.0219  | -0.0806 | 0.084   | -0.8317 |
| PBANKA_092790 | -0.1278 | -0.2841 | -0.2948 | 0.028   | 0.147   | 0.4876  | 0.2835  | -0.0369 | -0.0788 | -0.5468 | -1.1584 | -0.4249 |
| PBANKA_103640 | 0.0644  | 0.0233  | 0.1072  | 0.2923  | -0.3106 | -0.0196 | -0.0939 | 0.1938  | 0.3759  | 0.3576  | 0.4082  | 0.9509  |
| PBANKA_130110 | -0.2516 | 0.4027  | -0.3557 | 0.0322  | -0.1038 | -0.7703 | -0.5159 | -0.02   | -1.2347 | -0.5899 | -1.3518 | -0.8707 |
| PBANKA_134740 | -0.3219 | -0.7148 | 0.0319  | 0.1727  | 0.0289  | 0.1907  | 0.8188  | 0.6482  | 0.1971  | 0.1043  | -1.2041 | -1.5722 |
| PBANKA_082250 | 0.4641  | 0.1367  | 0.2272  | 0.3841  | 0.279   | 0.009   | 0.041   | -0.0552 | -0.0235 | -0.0737 | -0.0097 | 0.042   |
| PBANKA_145280 | 0.0278  | 0.5545  | -0.4153 | -0.255  | 0.0201  | -0.1045 | -0.1977 | -0.4337 | 0.2676  | 0.3482  | 0.5567  | 0.0731  |
| PBANKA_121560 | 0.8873  | 0.4351  | 0.7034  | 0.7428  | 0.3471  | 0.3506  | -0.1905 | -0.6912 | -0.2736 | -0.5355 | -0.6192 | -0.9202 |
| PBANKA_141730 | 0.0685  | -0.0795 | -0.058  | 0.0216  | 0.1238  | -0.1647 | -0.0319 | -0.1507 | -0.4577 | -0.1451 | -0.1112 | 0.4703  |
| PBANKA_081260 | -0.8255 | -0.8919 | -0.9301 | -0.2326 | -0.499  | 0.0668  | -0.3982 | 0.3708  | 0.8685  | 0.9085  | 0.9555  | 1.5063  |
| PBANKA_010270 | -0.0588 | -0.0019 | -0.0974 | -0.9525 | -0.0032 | 0.2615  | -0.0071 | -0.5186 | 0.2611  | 0.1334  | -0.0674 | -0.1406 |
| PBANKA_050760 | 0.0164  | -0.0585 | -0.1242 | -0.13   | 0.1401  | -0.2171 | 0.0319  | -0.1093 | -0.3894 | -0.5228 | -0.7826 | -0.171  |
| PBANKA_111550 | 0.5044  | -0.192  | -0.0919 | 0.0513  | -0.0086 | -0.3368 | 0.3627  | 0.4005  | 0.0679  | -0.3519 | -0.0327 | 0.011   |
| PBANKA_050790 | 0.2338  | -0.7781 | 0.0051  | 0.3568  | -0.0221 | 0.1607  | -0.1674 | 0.0758  | -0.0302 | 0.2569  | 0.4472  | 0.9453  |
| PBANKA_092250 | -0.8761 | -0.325  | -0.7434 | -0.6492 | -0.3771 | -0.2366 | 0.0694  | 0.257   | 0.2475  | 0.2947  | 0.3791  | -0.5235 |
| PBANKA_122250 | 0.5271  | 0.1033  | -0.2586 | -0.6035 | -0.0938 | -0.5469 | -0.4916 | -0.2715 | 0.3271  | 0.6489  | 0.4934  | 1.2066  |
| PBANKA_091780 | 0.2349  | 0.7635  | 0.0028  | -0.1842 | 0.1378  | -0.172  | -0.2387 | -0.1309 | -0.044  | -0.0721 | -0.1929 | -0.4204 |
| PBANKA_081250 | 0.4339  | 0.089   | 0.3694  | 0.0487  | 0.2252  | 0.3329  | -0.3822 | -0.3323 | -0.4817 | -0.8542 | -0.469  | -0.603  |
| PBANKA_112570 | -0.1325 | -0.2386 | 0.1714  | -0.0175 | 0.1552  | 0.4799  | 0.4227  | -0.0961 | -0.1528 | -0.2499 | -0.8145 | -0.3744 |
| PBANKA_144850 | -0.6889 | 0.0262  | -0.1213 | 0.5676  | 0.4381  | 0.7694  | 0.2368  | 0.4919  | 0.8109  | 0.3082  | 0.8911  | 0.443   |
| PBANKA_102590 | -0.4373 | -0.4327 | 0.138   | 0.2607  | 0.0503  | 0.4356  | 0.2146  | 0.2993  | -0.1731 | -0.2253 | -0.2657 | -0.7999 |
| PBANKA_134850 | 0.8022  | 0.4246  | 0.7084  | 0.8404  | 0.3822  | 0.7703  | -0.1134 | -0.4005 | -0.6989 | -1.276  | -1.1373 | -0.4119 |
| PBANKA_143840 | 0.0108  | 0.5026  | 0.1455  | 0.0302  | 0.2498  | 0.3483  | -0.0464 | 0.146   | 0.0692  | 0.0564  | -0.7242 | -0.5668 |
| PBANKA_091890 | -0.4314 | -0.1936 | -0.2494 | 0.1688  | -0.0439 | 0.3988  | 0.6149  | 0.2757  | 0.4176  | 0.4007  | -0.0413 | -0.2789 |
| PBANKA_141430 | 0.487   | -0.1067 | -0.1091 | 0.1868  | -0.0469 | 0.4033  | 0.4769  | 0.2538  | -0.2307 | -0.3084 | -0.232  | -0.2452 |
| PBANKA_123800 | -0.1821 | -0.75   | -0.6879 | -0.2197 | 0.0965  | -1.1249 | -0.2459 | -1.3218 | -1.4132 | -0.5985 | -0.384  | -0.217  |
| PBANKA_145360 | -0.3678 | -0.4994 | -0.216  | 0.402   | -0.0193 | 0.1374  | -0.1676 | -0.3544 | -0.4126 | -0.5381 | -0.8367 | -0.7842 |
| PBANKA_140570 | 0.5523  | 0.0454  | 0.3427  | 0.2483  | 0.025   | 0.2886  | 0.2135  | -0.2581 | -0.3191 | -0.5093 | -0.7554 | -0.6386 |
| PBANKA_060190 | -2.1875 | -2.3792 | -1.7188 | -0.6661 | -0.3933 | 0.2717  | 1.233   | 1.0492  | 1.5216  | 1.2586  | -1.5069 | -2.4911 |
| PBANKA_145150 | -0.9034 | -0.3952 | -0.5877 | -0.6711 | -0.1853 | 0.4395  | 0.7766  | 0.2143  | 0.6709  | 0.7053  | 0.5832  | -0.2899 |
| PBANKA_031330 | -0.1444 | -0.463  | -0.5349 | -0.2975 | -0.2816 | -0.2762 | 0.251   | 0.2993  | 0.3373  | 0.2413  | -0.1736 | -0.0823 |
| PBANKA_081970 | 0.0993  | 0.3317  | 0.1358  | 0.0107  | 0.1796  | 0.2238  | -0.1689 | -0.3026 | -0.1868 | -0.1541 | 0.0181  | 0.1931  |
| PBANKA_113540 | -0.0267 | 0.1828  | -0.4119 | -0.0269 | -0.4078 | -0.7325 | -0.8452 | -1.0645 | -0.519  | -0.4571 | -0.4377 | -0.5268 |
| PBANKA_030150 | 0.3163  | -0.0488 | -0.3499 | -0.4746 | -0.8575 | -0.721  | -0.6279 | -0.0741 | 0.4096  | 0.8543  | 0.2714  | 1.3449  |
| PBANKA_091230 | 0.5098  | 0.1965  | 0.1909  | -0.5961 | -0.2818 | -0.2415 | -0.1123 | -0.1649 | -0.6167 | -0.3482 | -0.4561 | -0.3192 |
| PBANKA_123080 | -0.556  | -0.0553 | 0.4488  | 0.6569  | -0.1545 | 0.8672  | -0.3298 | -0.4633 | -0.2677 | -0.6107 | -0.6076 | -0.051  |
| PBANKA_133120 | -0.363  | -0.325  | -0.1773 | 0.3409  | 0.0495  | 0.5067  | 0.5173  | 0.6113  | -0.0704 | 0.4578  | -0.1654 | 0.1545  |
| PBANKA_143880 | 0.4823  | 0.0085  | 0.4396  | 0.8729  | 0.3912  | 0.0652  | 0.3029  | 0.1844  | -0.3597 | -0.3898 | -0.2528 | 0.0564  |
| PBANKA_131080 | 0.459   | 1.1719  | 0.3634  | 0.0413  | 0.2607  | -0.2038 | -0.7528 | -1.0366 | -1.1916 | -0.4929 | 0.0413  | 0.4045  |
| PBANKA_131870 | 0.0049  | 0.5954  | 0.0189  | -0.0137 | -0.1317 | -0.0524 | -0.0646 | -0.4413 | -0.3205 | 0.0705  | 0.5899  | 0.3585  |
| PBANKA_092130 | -1.1005 | -0.906  | -0.0451 | 0.4564  | 0.3998  | 0.4315  | 0.567   | -0.0361 | -0.3464 | -0.8673 | -0.9802 | -1.4133 |
| PBANKA_140220 | 0.1422  | 0.2624  | 0.4457  | 0.0603  | -0.6256 | -0.3084 | 0.1929  | 0.1239  | -0.1547 | -0.634  | 0.1114  | -0.5013 |
| PBANKA_123970 | 0.3491  | 0.8143  | 0.1111  | -0.077  | -0.0209 | -0.1508 | -0.4772 | -0.3381 | -0.4118 | -0.027  | 0.6533  | 0.8083  |
| PBANKA_091370 | -0.1819 | 0.014   | 0.0271  | 0.2777  | 0.0897  | 0.2442  | 0.1729  | -0.3102 | -0.3658 | -0.9426 | -1.1544 | -0.8614 |

|               |         |         |         |         |         |         |         |         |         |         |         |         |
|---------------|---------|---------|---------|---------|---------|---------|---------|---------|---------|---------|---------|---------|
| PBANKA_050620 | 0.0175  | -0.063  | -0.1309 | -0.3792 | -0.3255 | 0.1339  | -0.1413 | -0.1176 | 0.1795  | 0.5651  | 1.301   | 1.6083  |
| PBANKA_113230 | -0.4514 | -0.323  | 0.1589  | 0.2054  | 0.2956  | -0.3154 | 0.2086  | 0.0176  | -0.0554 | 0.0285  | 0.1362  | 0.151   |
| PBANKA_040480 | -0.9737 | -0.6928 | -0.2982 | -0.178  | 0.0794  | 0.5926  | 0.6191  | 0.5956  | 0.3487  | 0.3058  | -1.0776 | -0.5486 |
| PBANKA_094090 | 0.3938  | 0.5391  | 0.1239  | -0.2847 | -0.1097 | 0.0345  | -0.1052 | -0.013  | -0.3257 | -0.4699 | -0.5373 | -0.4932 |
| PBANKA_102640 | -0.0153 | 0.2388  | 0.1301  | 0.6855  | -0.0582 | 0.2203  | 0.1801  | 0.1204  | 0.126   | 0.1001  | 0.5192  | 0.3535  |
| PBANKA_102140 | -0.6382 | -0.5887 | -0.0516 | 0.4941  | 0.3838  | 0.6335  | 0.7524  | 0.5278  | 0.2286  | -0.2114 | -1.1883 | -1.4202 |
| PBANKA_070390 | 0.4308  | -0.0587 | 0.4042  | 0.0228  | 0.3634  | -0.3192 | -0.7603 | -1.2327 | -1.6343 | -1.9451 | -1.1335 | -0.4659 |
| PBANKA_135570 | -0.7154 | -0.5411 | -0.8336 | -0.2265 | -1.1248 | -0.5431 | -0.3683 | 0.4671  | 0.5637  | 1.4927  | 1.3713  | 1.0099  |
| PBANKA_122660 | -0.4331 | 0.4582  | -0.0728 | -0.8576 | -0.0931 | -0.1609 | -0.0309 | -0.4789 | -0.502  | -0.6949 | -0.7627 | -0.7914 |
| PBANKA_010570 | 0.2053  | -0.4037 | -0.0367 | 0.4107  | 0.1948  | 0.1294  | 0.126   | 0.1374  | 0.2171  | 0.1454  | -0.0618 | -0.055  |
| PBANKA_090310 | 0.3305  | 0.4508  | -0.2233 | -0.1522 | -0.5541 | -0.2869 | -0.1391 | -0.1565 | 0.3169  | 0.492   | 1.2738  | 1.211   |
| PBANKA_083020 | -1.4984 | -0.7153 | -0.7788 | -0.5124 | -0.1342 | 0.2676  | 0.503   | 0.6634  | -0.0965 | -0.033  | -1.1458 | -1.4448 |
| PBANKA_133690 | -0.361  | -0.334  | -0.6381 | -0.2352 | -0.0672 | 0.1006  | 0.335   | 0.7836  | 0.6527  | 0.5826  | 0.4355  | 0.3529  |
| PBANKA_134330 | -0.3026 | -0.0306 | 0.0915  | 0.2895  | 0.6446  | 0.3509  | 0.1754  | -0.456  | -1.0266 | -1.1858 | -1.4453 | -1.7726 |
| PBANKA_062170 | 0.5789  | 0.4037  | 0.4821  | 0.5298  | 0.2479  | 0.6099  | 0.044   | 0.0997  | -0.3085 | -0.8282 | -0.8714 | -0.773  |
| PBANKA_031190 | -0.5541 | -0.2486 | -0.0765 | -0.1801 | -0.5567 | 0.6001  | 0.4865  | 0.4798  | 0.4254  | -0.0569 | -0.6472 | -0.609  |
| PBANKA_051190 | 0.4874  | 0.4117  | 0.4446  | 0.417   | 0.4076  | -0.0179 | -0.3666 | -0.7779 | -0.9476 | -1.1927 | -0.5291 | -0.26   |
| PBANKA_030890 | 0.2886  | 1.0517  | -0.116  | 0.1696  | -0.1559 | -0.5199 | 0.1904  | 0.3627  | 0.0323  | 0.2952  | -0.19   | -0.2567 |
| PBANKA_052420 | -0.6971 | -0.4378 | -0.5416 | -0.4459 | 0.3067  | 0.0478  | 0.15    | 0.1077  | 0.632   | 0.6151  | 0.4512  | 0.1793  |
| PBANKA_141500 | 0.5359  | 0.5512  | -0.0448 | -0.41   | -0.0922 | -0.3496 | -0.1343 | 0.2699  | 0.0425  | 0.3498  | -0.2209 | -0.2915 |
| PBANKA_010090 | 0.0888  | 0.3828  | -0.0332 | -0.5895 | -0.1824 | -1.5988 | -0.6191 | -0.1519 | 0.1622  | 0.471   | 1.5325  | 1.6221  |
| PBANKA_143320 | 0.5263  | 0.7479  | 0.4233  | 0.1857  | 0.1633  | 0.0321  | -0.0484 | -0.0765 | 0.2756  | 0.1974  | 0.1226  | 1.0487  |
| PBANKA_041530 | 0.6097  | 0.047   | 0.2911  | 0.3297  | 0.092   | 0.5227  | 0.0928  | 0.2157  | 0.1396  | -0.0538 | -0.2694 | -0.3642 |
| PBANKA_052240 | -0.1221 | -1.1872 | -0.2125 | 0.0996  | -0.0612 | 0.4293  | 0.0447  | 0.2525  | 0.0814  | -0.082  | -0.1859 | 0.0016  |
| PBANKA_124010 | -0.7716 | -0.593  | -0.3522 | -0.4224 | -0.3475 | 0.1722  | -0.0753 | 0.033   | 0.4104  | 0.802   | 1.0341  | 0.8108  |
| PBANKA_090450 | -0.4851 | -0.3434 | -0.1156 | -0.3069 | 0.0112  | -0.1078 | -0.0692 | -0.283  | -0.6999 | -0.5704 | -0.6482 | -0.7306 |
| PBANKA_080370 | -0.1854 | -0.0927 | 0.0568  | 0.0839  | 0.0124  | 0.3784  | 0.2169  | 0.2202  | 0.0655  | 0.0588  | -0.6072 | -0.3285 |
| PBANKA_020770 | 0.3164  | -0.3703 | -0.0053 | 0.2079  | 0.0386  | -0.1186 | -0.0754 | -0.1002 | -0.4982 | -0.862  | -0.4993 | -0.7528 |
| PBANKA_050700 | -0.0689 | -0.6447 | -0.0924 | -0.2638 | -0.3267 | -0.6586 | -0.2052 | -0.2369 | -0.2017 | -0.0006 | -0.0131 | -0.6389 |
| PBANKA_040520 | 0.2017  | 1.092   | 0.2789  | 0.2455  | 0.3082  | 0.1695  | -0.1904 | -0.1977 | -0.1803 | -0.5262 | -0.2792 | -0.326  |
| PBANKA_101990 | -0.557  | -0.1944 | -0.2645 | -0.245  | 0.3521  | 0.7322  | 0.4695  | 0.5096  | 1.4124  | 1.2383  | 0.7339  | -0.1863 |
| PBANKA_050150 | -0.1399 | -0.0624 | 0.3417  | 0.3085  | 0.3494  | 0.4791  | 0.2033  | -0.2411 | -0.4238 | -0.1424 | 0.0453  | -0.326  |
| PBANKA_130970 | 0.2707  | 0.9233  | 0.1217  | 0.1647  | -0.0782 | -0.1088 | -0.1881 | -0.1526 | -0.1264 | 0.2059  | 0.8172  | 1.3916  |
| PBANKA_071710 | 0.4461  | 0.5868  | 0.2717  | 0.0216  | 0.4201  | 0.1778  | 0.2351  | 0.335   | 0.3232  | 0.1084  | -0.2355 | -0.0685 |
| PBANKA_093720 | 0.644   | 0.4558  | 0.2126  | -0.2076 | -0.0699 | -0.5295 | -0.8552 | -0.6417 | -0.4875 | 0.0538  | 1.1066  | 0.6746  |
| PBANKA_110360 | 0.0441  | 0.0851  | -0.1691 | 0.0774  | -0.05   | -0.061  | 0.0058  | -0.0411 | 0.3411  | -0.0711 | -0.1964 | 0.0916  |
| PBANKA_143760 | -1.6053 | -1.1852 | -1.6309 | -0.9299 | -0.8383 | -0.3157 | 0.2523  | 0.5304  | 1.0901  | 1.2826  | 1.0082  | 0.6425  |
| PBANKA_051230 | -0.1809 | 0.0301  | -0.0171 | 0.2238  | 0.1915  | 0.2838  | 0.293   | -0.0576 | -0.1656 | -0.1236 | -0.7496 | -0.6012 |
| PBANKA_142310 | -0.1041 | -0.3548 | -0.3566 | -0.0439 | -0.126  | -0.0681 | 0.2548  | 0.3623  | 0.3509  | 0.255   | 0.0622  | 0.0575  |
| PBANKA_051950 | 0.1098  | 0.3609  | 0.0366  | 0.2932  | 0.0935  | 0.3921  | 0.552   | 0.0634  | -0.2068 | 0.09    | -0.0581 | -0.467  |
| PBANKA_100380 | 0.3754  | 0.4344  | 0.2381  | -0.0439 | 0.0254  | -0.0459 | -0.0106 | -0.4173 | -0.9723 | -0.7847 | -0.5895 | -0.7989 |
| PBANKA_122390 | 0.1552  | 0.7573  | 0.1186  | 0.4739  | 0.0213  | 0.2576  | -0.1782 | 0.137   | 0.2363  | 0.125   | -0.342  | -0.3733 |
| PBANKA_011080 | -0.633  | -0.0929 | -0.5926 | 0.0881  | -0.6203 | -0.4485 | -0.7238 | -0.3917 | 0.2136  | 1.0437  | 1.5844  | 1.8463  |
| PBANKA_010960 | -0.6278 | -0.3272 | -0.1602 | 0.3116  | 0.3641  | 0.0309  | 0.366   | -0.0579 | -0.3291 | -0.5948 | -0.9263 | -1.1972 |
| PBANKA_113570 | 0.0823  | 0.562   | -0.2203 | 0.0263  | -0.0189 | -0.239  | -0.2459 | -0.4426 | -0.2106 | -0.2864 | 0.4009  | 1.2712  |
| PBANKA_050450 | 0.1453  | -0.0332 | 0.1864  | 0.2048  | 0.2159  | 0.5674  | 0.2397  | 0.7096  | 0.1599  | 0.1523  | -0.0289 | -0.4686 |
| PBANKA_080150 | -0.5837 | -0.6587 | -0.4028 | -0.4427 | -0.2857 | -0.1448 | -0.1213 | -0.0468 | 0.6199  | 0.4444  | 0.1853  | 0.6581  |
| PBANKA_040240 | -0.5039 | -0.6848 | -1.0851 | -0.2358 | -0.3704 | -1.0802 | -0.5151 | -0.1042 | -0.0584 | 0.2243  | 0.3676  | 0.5842  |
| PBANKA_122930 | 0.2571  | 0.6881  | 0.249   | 0.6446  | 0.079   | 0.3121  | 0.3601  | 0.5149  | 0.4185  | 0.0291  | -0.2957 | -0.0949 |
| PBANKA_021220 | -0.0433 | 0.1259  | 0.0629  | 0.057   | -0.1769 | 0.3066  | 0.0642  | 0.1036  | 0.1718  | -0.0433 | -0.4978 | -0.6811 |
| PBANKA_135120 | 0.299   | 0.5295  | 0.1723  | 0.6919  | 0.2401  | 0.3513  | -0.2287 | -0.1858 | -0.0027 | -0.346  | -0.3155 | -0.5386 |
| PBANKA_145460 | -0.0944 | 0.0799  | -0.1549 | 0.0311  | 0.0104  | -0.0188 | 0.2155  | 0.208   | 0.3838  | 0.5071  | 0.2443  | -0.4831 |
| PBANKA_135960 | -0.6489 | -0.4716 | -0.2656 | -0.0781 | 0.1711  | -0.9216 | -0.0401 | 0.3065  | 0.8948  | 0.7345  | 2.1257  | 2.0444  |
| PBANKA_133100 | 0.0463  | -0.021  | 0.3183  | 0.6791  | 0.072   | 0.2788  | -0.0733 | -0.4798 | -0.7089 | -0.7178 | -0.8871 | -0.8669 |
| PBANKA_083530 | 0.0147  | -0.2452 | 0.0614  | 0.5251  | 0.2662  | -0.3254 | -0.0262 | -0.0124 | 0.1018  | -0.6279 | 0.6058  | -0.3092 |
| PBANKA_081460 | 0.1301  | 0.2429  | 0.1708  | 0.5649  | 0.1681  | 0.0757  | 0.0319  | 0.1768  | -0.3577 | -0.2034 | -0.6331 | -0.2177 |
| PBANKA_101770 | -0.7925 | -0.8635 | -0.4716 | 0.0097  | -0.042  | 0.2956  | 0.2158  | 0.3202  | 0.1922  | -0.0925 | -1.195  | -1.4022 |
| PBANKA_130700 | -0.3063 | -0.3343 | -0.334  | -0.6996 | 0.0285  | -0.259  | -0.0008 | 0.4565  | 0.334   | 0.5883  | -0.2654 | -0.3507 |
| PBANKA_124470 | -0.1532 | -0.8142 | 0.1523  | -0.1388 | 0.0912  | 0.1735  | 0.2896  | 0.5788  | 0.634   | 0.5544  | 0.3583  | 0.0372  |
| PBANKA_121600 | 0.3998  | 0.2014  | 0.4417  | 0.5255  | 0.1684  | 0.4897  | -0.2882 | -0.1988 | 0.194   | -0.2285 | -0.3382 | -0.6484 |
| PBANKA_113050 | 0.1715  | 0.2191  | 0.1909  | 0.2785  | 0.3646  | 0.0947  | 0.1644  | -0.2488 | -0.7882 | -1.2598 | -1.5444 | -1.3221 |
| PBANKA_142240 | -0.3725 | 0.9047  | 0.1533  | -0.4366 | 0.09    | -0.046  | -0.2578 | -0.0929 | -0.4751 | -0.5437 | -0.5165 | 0.7646  |
| PBANKA_070400 | 0.3881  | 0.2465  | 0.0634  | 0.6851  | 0.2359  | 0.0106  | 0.0454  | -0.0109 | -0.0729 | -0.319  | -0.4516 | -0.5715 |

|               |         |         |         |         |         |         |         |         |         |         |         |         |
|---------------|---------|---------|---------|---------|---------|---------|---------|---------|---------|---------|---------|---------|
| PBANKA_031480 | -0.1553 | -0.3134 | -0.1078 | 0.4252  | 0.2065  | 0.5975  | 0.2556  | 0.6014  | 0.4605  | 0.2538  | 0.4261  | 0.4159  |
| PBANKA_080050 | 0.1155  | 0.8386  | -0.1855 | -0.976  | -0.6381 | -2.029  | -1.3691 | -1.4664 | -1.2628 | -0.2528 | 0.7401  | 0.8634  |
| PBANKA_142570 | 0.0901  | 0.0199  | 0.2351  | 0.4179  | 0.2766  | 0.495   | 0.1858  | -0.0084 | -0.1146 | -0.2872 | -0.6242 | -0.5922 |
| PBANKA_100960 | -0.316  | -0.9943 | -0.7605 | -0.2861 | -0.3306 | 0.0131  | -0.3248 | -0.2107 | 0.3107  | 0.3777  | 1.318   | 1.4713  |
| PBANKA_101640 | 0.276   | -0.1085 | -0.0173 | 0.259   | 0.2277  | 0.8293  | 0.0815  | -0.1161 | 0.111   | -0.292  | -0.4256 | -0.5642 |
| PBANKA_051650 | 0.7948  | 0.8741  | 0.1521  | 0.3225  | -0.0114 | -0.1115 | -0.2022 | -0.4013 | 0.0201  | -0.0478 | -0.6072 | -0.4382 |
| PBANKA_021000 | 0.075   | -0.2177 | 0.0013  | 0.8139  | 0.1225  | 0.7035  | 0.1517  | 0.304   | 0.2187  | -0.1272 | -0.5837 | -0.5897 |
| PBANKA_080140 | 0.4838  | 0.2307  | 0.4299  | 0.1323  | 0.2946  | -0.139  | -0.1801 | -0.8877 | -1.0968 | -1.6011 | -1.1704 | -0.1886 |
| PBANKA_100860 | -0.2238 | -1.0354 | -0.2256 | -0.2615 | 0.0593  | -0.3554 | 0.1507  | 0.4606  | 1.0452  | 0.9418  | -0.0015 | 0.1089  |
| PBANKA_091940 | -0.7546 | -0.1521 | -0.5299 | -0.3445 | -0.2281 | -0.2123 | 0.1882  | 0.4061  | 0.6236  | 0.9416  | 0.1392  | 0.3448  |
| PBANKA_123100 | 0.2107  | 0.2544  | 0.3751  | 0.2592  | 0.3268  | 0.0905  | -0.4408 | -0.9262 | -1.0627 | -1.8035 | -0.7571 | -0.3104 |
| PBANKA_030590 | 1.0098  | -0.2579 | -0.0235 | 0.6174  | 0.0748  | 0.1969  | 0.1027  | -0.1401 | -0.8335 | -0.842  | -0.8501 | -0.4943 |
| PBANKA_071810 | -0.0379 | -0.0657 | 0.2092  | 0.3759  | 0.2758  | 0.3758  | 0.3122  | 0.4197  | 0.432   | 0.0885  | -0.1362 | -0.0486 |
| PBANKA_091800 | 0.5294  | 1.0645  | 0.4237  | 0.3184  | -0.1068 | -0.1171 | -0.1999 | -0.4923 | -0.8292 | -0.7348 | -0.1717 | -0.1979 |
| PBANKA_051060 | -0.1939 | -0.2332 | 0.2157  | -0.1568 | 0.1351  | 0.3675  | 0.1606  | 0.2     | 0.0114  | 0.0624  | 0.5284  | 0.3845  |
| PBANKA_051880 | 0.8055  | 0.8955  | 0.7015  | 0.2193  | 0.3494  | -0.0985 | -0.0103 | -0.4249 | -0.6195 | -0.3721 | -0.1398 | -0.0944 |
| PBANKA_110250 | -0.0848 | -0.0954 | 0.3569  | 0.6225  | 0.4837  | 0.2055  | -0.2654 | -0.3584 | -0.6045 | -1.102  | -1.2863 | -0.8067 |
| PBANKA_143810 | 0.3297  | -0.177  | 0.0635  | 0.5063  | -0.0718 | 0.5351  | 0.2265  | 0.1973  | -0.1051 | -0.2234 | -0.6903 | -1.0532 |
| PBANKA_142540 | 0.1055  | -0.0167 | 0.173   | 0.3061  | 0.1305  | 0.0648  | -0.0133 | -0.5197 | -0.4105 | -0.7667 | -0.5116 | -0.605  |
| PBANKA_134680 | 0.1818  | 0.0177  | 0.12    | -0.0454 | -0.2939 | -0.2888 | 0.1333  | -0.3888 | -0.6189 | -0.5267 | 0.1115  | -0.0582 |
| PBANKA_092800 | 0.0259  | -0.0913 | -0.3785 | -0.4847 | 0.095   | 0.3498  | -0.461  | -0.3092 | -0.1904 | -0.2989 | -0.7703 | 0.0713  |
| PBANKA_131170 | -0.0668 | 0.0623  | 0.0496  | 0.0508  | -0.1164 | 0.4767  | 0.1909  | 0.4003  | 0.6686  | 0.6167  | 0.4606  | 0.307   |
| PBANKA_112840 | 0.2584  | -0.3608 | 0.5908  | 0.7723  | 0.2855  | 0.8247  | -0.0549 | -0.1004 | -0.136  | -0.5403 | -0.0048 | 0.2815  |
| PBANKA_090440 | 0.5342  | 0.3261  | 0.271   | 0.2259  | 0.0829  | 0.26    | -0.6047 | -0.8287 | -0.5126 | -0.5005 | -0.0551 | -0.0348 |
| PBANKA_011170 | -0.7862 | -1.5561 | -0.2515 | 0.0201  | 0.1221  | 0.2002  | 0.598   | 0.396   | 0.2031  | -0.1275 | -0.9171 | -0.9525 |
| PBANKA_111890 | 0.2934  | 0.1051  | 0.2683  | 0.3258  | 0.4422  | -0.7392 | 0.1914  | 0.0267  | 0.0154  | 0.0831  | -0.6177 | -0.1527 |
| PBANKA_070540 | -0.5114 | -0.0751 | -0.3704 | -0.1682 | -0.3871 | 0.0478  | 0.3359  | 0.4578  | 0.2789  | 0.0339  | -0.1933 | -0.5371 |
| PBANKA_051900 | -1.9536 | -2.4437 | -1.6727 | -1.1622 | -0.815  | 0.141   | 0.301   | 0.3944  | 0.4576  | 0.7596  | 0.3131  | -0.4665 |
| PBANKA_080350 | -1.0787 | -0.9111 | -0.2769 | -0.1188 | 0.4963  | 0.1465  | 0.1793  | -0.2007 | -0.4977 | -0.997  | -1.2558 | -1.6298 |
| PBANKA_144460 | -0.072  | 0.0798  | -0.1292 | 0.3852  | -0.1029 | 0.1106  | -0.1154 | 0.1033  | -0.0793 | -0.1442 | -0.072  | -0.0841 |
| PBANKA_134540 | -0.2961 | 0.0306  | -0.1886 | -0.031  | 0.1183  | 0.2659  | 0.1785  | 0.3329  | 0.1627  | 0.4886  | -0.5801 | -1.0182 |
| PBANKA_110810 | -0.2131 | 0.0739  | -0.0191 | -0.1514 | -0.2116 | 0.5134  | 0.1722  | 0.4417  | 0.5259  | 0.1686  | -0.0915 | -0.1414 |
| PBANKA_133730 | 0.2569  | -0.2036 | 0.2855  | 0.3578  | 0.3209  | -0.0813 | 0.2691  | 0.1774  | -0.2674 | -0.1948 | -1.0115 | -0.716  |
| PBANKA_112550 | -0.2792 | -0.6137 | 0.3414  | 0.2448  | 0.9146  | 0.3525  | 0.2144  | -0.1647 | -0.0636 | -0.5814 | -0.4585 | -0.7528 |
| PBANKA_131570 | -0.433  | -0.3109 | -0.4176 | -0.4572 | -0.4281 | -0.084  | 0.0809  | 0.0036  | 0.3485  | 0.7676  | 0.8581  | 0.3888  |
| PBANKA_132080 | 0.0039  | 0.1816  | -0.0217 | -0.3932 | 0.0428  | -1.039  | -0.1105 | 0.0485  | 0.2684  | 0.4517  | 1.0576  | 1.2596  |
| PBANKA_121100 | 0.3967  | 0.885   | -0.0921 | 0.373   | 0.1269  | 0.0583  | -0.121  | -0.3169 | -0.3434 | -0.193  | 0.3101  | -0.4953 |
| PBANKA_101760 | -0.0281 | -0.3358 | 0.0868  | -0.0196 | -0.0899 | 0.3305  | 0.2231  | 0.2283  | 0.1943  | 0.0602  | -0.6661 | -0.3281 |
| PBANKA_093660 | -0.0278 | 0.4871  | -0.5583 | 0.0226  | -0.5465 | -0.5078 | -0.4163 | -0.5195 | -0.1918 | 0.2633  | 1.5429  | 1.2972  |
| PBANKA_123890 | 0.141   | 0.2048  | 0.2572  | 0.0137  | 0.1864  | -0.1942 | 0.0472  | 0.5656  | 0.621   | 0.7016  | 0.8528  | 0.6506  |
| PBANKA_011090 | 0.7046  | -0.3121 | 0.2591  | 0.0286  | -0.2012 | -0.2906 | -0.1381 | -0.2155 | 0.1192  | -0.5436 | 0.1976  | 0.6045  |
| PBANKA_142810 | 0.5917  | 0.3374  | 0.1525  | 0.1344  | 0.1425  | -0.0302 | -0.0434 | 0.1155  | 0.2269  | 0.1788  | 0.1546  | 0.1347  |
| PBANKA_050510 | -0.4076 | 0.4203  | -0.3618 | -0.4974 | 0.0847  | 0.2092  | -0.2371 | -0.0387 | -0.1471 | 0.2253  | 0.1641  | -0.6374 |
| PBANKA_100200 | 0.3467  | 0.7928  | 0.1297  | 0.1124  | 0.0751  | -0.1788 | -0.4188 | -0.3701 | -0.5869 | -0.571  | -0.6156 | -0.7719 |
| PBANKA_103430 | 0.2888  | -0.1721 | -0.4271 | -0.3828 | -0.3998 | -0.6532 | -0.294  | -0.0086 | 0.1666  | 0.9033  | 1.1285  | 1.1479  |
| PBANKA_141080 | -0.0658 | -0.6157 | 0.18    | 0.2792  | 0.3917  | 0.1964  | 0.2064  | -0.7085 | -0.878  | -1.4514 | -1.594  | -1.8623 |
| PBANKA_092040 | 0.2288  | 0.0684  | -0.2149 | 0.0495  | -0.2148 | 0.1374  | -0.0412 | 0.3363  | 0.1432  | 0.304   | 0.4527  | 0.7111  |
| PBANKA_051740 | 0.3546  | 0.2787  | 0.0031  | -0.2164 | -0.0818 | 0.2325  | 0.3257  | 0.2367  | 0.0715  | 0.0159  | 0.4152  | 0.0864  |
| PBANKA_062250 | -0.1849 | -0.3097 | -0.3145 | -0.1509 | 0.1769  | 0.1673  | 0.3254  | 0.5438  | 0.5643  | 0.321   | -0.1976 | -0.5709 |
| PBANKA_130880 | -0.16   | 0.338   | -0.2271 | -0.3923 | -0.4499 | -0.4313 | -0.09   | 0.0032  | -0.1717 | -0.0467 | 0.0284  | -0.0873 |
| PBANKA_070610 | 0.3762  | 0.5223  | 0.2234  | 0.5726  | 0.0488  | 0.5832  | 0.0354  | -0.428  | -0.3729 | -0.6889 | -0.4183 | -0.2468 |
| PBANKA_111130 | -0.0866 | -0.0533 | 0.2443  | 0.3734  | 0.0757  | 0.5194  | -0.0063 | -0.2168 | -0.0798 | -0.5839 | -0.4857 | -0.7258 |
| PBANKA_145690 | -0.6274 | -0.4099 | -0.5498 | -0.1525 | -0.1789 | -0.0264 | 0.0323  | 0.255   | 0.3312  | 0.4423  | -0.1099 | 0.3389  |
| PBANKA_070070 | -0.0635 | 0.236   | -0.2638 | -0.3092 | -0.8386 | -0.5804 | -0.5331 | -0.3089 | 0.0472  | 0.212   | 0.8871  | 1.4839  |
| PBANKA_020540 | 0.0362  | -0.149  | -0.0995 | 0.3155  | 0.3032  | 0.531   | -0.0476 | -0.3458 | -0.8839 | -1.1047 | -1.4298 | -1.1818 |
| PBANKA_081320 | 0.3004  | 0.082   | -0.166  | -0.5014 | 0.0112  | -0.2276 | -0.2139 | -0.3515 | -0.5919 | -0.3284 | -0.0469 | -0.6675 |
| PBANKA_062280 | 1.0726  | 0.1737  | 0.0687  | 0.6545  | 0.0433  | -0.3701 | -0.2079 | -0.3028 | 0.0826  | -0.1232 | -0.678  | 0.4461  |
| PBANKA_010070 | -0.1672 | -0.045  | -0.1189 | -0.2707 | -0.5105 | -0.458  | -0.3434 | 0.2755  | 0.4064  | 0.6103  | 1.0958  | 0.8102  |
| PBANKA_112240 | 0.2353  | 0.191   | -0.141  | 0.4813  | -0.2136 | 0.2084  | -0.0802 | -0.3525 | -0.2648 | -0.3119 | -0.4177 | -0.154  |
| PBANKA_103690 | -0.5382 | 0.2748  | -0.0364 | 0.1133  | 0.041   | 0.1532  | 0.0426  | 0.5182  | 0.0337  | -0.6813 | -0.6467 | -1.0123 |
| PBANKA_130100 | 0.3272  | -0.581  | -0.2226 | -0.7102 | -0.1382 | -1.0805 | -0.2517 | -0.5756 | -0.0634 | -0.1552 | -0.1935 | -0.0237 |
| PBANKA_093380 | -1.3879 | -0.1932 | -1.3398 | -2.2102 | -0.7811 | -1.494  | -0.9104 | -1.0526 | -1.218  | -1.1143 | -0.6502 | -0.9464 |
| PBANKA_133970 | 0.4634  | 1.0527  | 0.2075  | 0.2852  | 0.7094  | 0.6552  | 0.1622  | -0.1972 | -0.3536 | -0.6318 | -0.6986 | 0.2282  |

|               |         |         |         |         |         |         |         |         |         |         |         |         |
|---------------|---------|---------|---------|---------|---------|---------|---------|---------|---------|---------|---------|---------|
| PBANKA_112730 | 0.3232  | -0.0744 | 0.0579  | 0.0794  | 0.0805  | -0.1604 | 0.049   | 0.3465  | 0.0757  | -0.5053 | -1.1334 | -1.0721 |
| PBANKA_080240 | -0.0487 | -1.0427 | -0.2736 | -0.2686 | -0.0643 | -0.1115 | 0.3581  | 0.1332  | -0.1497 | 0.2997  | -0.145  | 0.4096  |
| PBANKA_142070 | -0.1715 | -0.3222 | 0.1425  | 0.23    | -0.0097 | -0.5908 | -0.1933 | 0.2035  | 0.7532  | 1.033   | 1.1824  | 1.4043  |
| PBANKA_144880 | -0.5143 | -0.5643 | -0.1806 | -0.0771 | 0.0228  | 0.5475  | 0.2318  | 0.4961  | 0.3011  | 0.2844  | -0.4311 | -0.3238 |
| PBANKA_061920 | -0.2164 | -0.2452 | -0.4577 | -0.3979 | -0.4727 | -1.2477 | 0.3258  | -0.1152 | 0.2405  | 0.2157  | 0.8311  | 0.7466  |
| PBANKA_110840 | 0.0214  | 0.1629  | -0.0961 | 0.5936  | 0.2424  | 0.2554  | 0.1487  | -0.0889 | -0.4101 | -0.5854 | -0.3672 | -0.8877 |
| PBANKA_110090 | -0.1321 | 0.5565  | -0.0766 | -0.297  | -0.093  | 0.0251  | -0.8472 | -0.1667 | -0.3309 | 0.3003  | 0.9282  | 0.9704  |
| PBANKA_061790 | 0.31    | 0.9334  | 0.4117  | 0.0386  | 0.2047  | -0.3927 | 0.0038  | -0.1041 | -0.4627 | -0.4202 | -0.5112 | -0.3037 |
| PBANKA_113040 | -0.417  | 0.2132  | -0.0086 | 0.2351  | 0.2571  | 0.2021  | -0.0165 | -0.6423 | -0.8121 | -1.041  | -0.9964 | -1.1721 |
| PBANKA_031340 | -0.5257 | -0.3912 | -0.4956 | -0.1939 | -0.1515 | -0.2263 | 0.0812  | 0.569   | 1.1737  | 1.533   | 0.8554  | 0.4156  |
| PBANKA_060990 | -0.2442 | -0.2323 | -0.2582 | 0.0987  | -0.1419 | 0.1585  | 0.5717  | 0.1578  | -0.4332 | -0.4772 | -0.4804 | -0.3952 |
| PBANKA_080700 | 0.3405  | 0.7753  | 0.0599  | -0.0111 | 0.0816  | 0.2367  | 0.2016  | -0.0729 | -0.4037 | -0.1397 | 0.2299  | 0.2659  |
| PBANKA_101140 | -0.9292 | -0.1396 | -0.5163 | 0.1122  | -0.081  | 0.112   | 0.058   | 0.245   | -0.0427 | 0.2456  | 0.2941  | -0.2539 |
| PBANKA_130530 | -0.3794 | 0.2662  | -0.0733 | -0.1121 | 0.42    | 0.4096  | -0.0001 | -0.2163 | -0.4282 | -0.3427 | -0.4939 | -0.5462 |
| PBANKA_123500 | 0.6548  | 0.2255  | 0.649   | 0.565   | 0.5809  | -0.5112 | -0.3275 | -0.6179 | -0.7484 | -0.8808 | -0.0796 | -0.2747 |
| PBANKA_135860 | -0.1932 | 0.1756  | -0.2716 | -0.2029 | 0.394   | -0.0673 | 0.1564  | -0.151  | 0.0152  | -0.3899 | -0.5802 | -0.4514 |
| PBANKA_030480 | -0.3119 | -0.0466 | -0.2758 | -0.05   | 0.0563  | 0.4825  | 0.5932  | 0.6522  | 0.8113  | 0.6644  | -0.2583 | -0.5808 |
| PBANKA_052370 | -1.7103 | -0.7338 | -1.5909 | -1.445  | -1.0105 | -0.3783 | -0.0067 | 0.8017  | 1.286   | 1.7231  | 0.6198  | 0.2914  |
| PBANKA_091300 | -0.0234 | -0.6421 | -0.1112 | 0.357   | 0.1712  | -0.1558 | 0.0061  | 0.1007  | 0.382   | 0.4142  | -0.2607 | 0.0135  |
| PBANKA_091060 | -0.1636 | -0.1351 | -0.0513 | 0.3417  | 0.422   | 0.7662  | 0.3752  | 0.1887  | -0.0039 | -0.4815 | -0.8884 | -0.4141 |
| PBANKA_134900 | -2.1556 | -1.4826 | -2.4188 | -1.3805 | -0.7484 | -0.0927 | 0.4635  | 0.9727  | 0.908   | 1.0521  | -0.134  | -1.2165 |
| PBANKA_110860 | -0.4792 | -0.7554 | -0.0849 | 0.2168  | 0.2848  | 0.2923  | 0.4081  | 0.2544  | 0.2042  | 0.057   | -0.2654 | -0.4523 |
| PBANKA_141470 | -0.2569 | -0.9757 | -0.0599 | 0.5252  | 0.3903  | 0.6668  | 0.108   | -0.3108 | -0.3462 | -0.6795 | -0.725  | -0.9357 |
| PBANKA_083350 | -0.1783 | -0.1411 | -0.246  | -0.0651 | -0.2445 | -0.0182 | 0.2499  | 0.1045  | -0.1231 | -0.4595 | 0.2055  | 0.0611  |
| PBANKA_080490 | -0.1194 | 0.3718  | 0.2505  | -0.6033 | -0.1869 | -0.1645 | -0.3932 | -0.7778 | -0.9215 | -0.7146 | 0.1749  | -0.2561 |
| PBANKA_134830 | 0.3702  | 0.1242  | 0.4228  | 0.1558  | 0.3979  | -0.5988 | -0.3435 | -0.4392 | -0.177  | -0.0818 | 0.6007  | 0.982   |
| PBANKA_070330 | 0.1952  | 0.4078  | -0.2522 | 0.2027  | -0.1497 | 0.0282  | -0.3307 | 0.1686  | 0.0841  | -0.1555 | 0.7959  | 0.6593  |
| PBANKA_103150 | -0.126  | 0.6799  | -0.0008 | -0.1351 | 0.1505  | 0.1907  | 0.0862  | 0.0546  | 0.6704  | 0.1902  | 0.4674  | 0.1977  |
| PBANKA_131560 | -0.4065 | 0.8375  | -0.6226 | -0.8325 | -0.1892 | -1.2457 | -0.9603 | -0.6324 | -0.4119 | 0.3267  | 1.788   | 1.7685  |
| PBANKA_113630 | -0.1063 | -1.0863 | -0.1531 | -0.2847 | -0.061  | -0.0232 | 0.0301  | 0.232   | 0.0478  | 0.0866  | 0.1481  | 0.7983  |
| PBANKA_031180 | -0.4856 | 0.0101  | -1.0332 | -1.1944 | -1.3138 | -0.9622 | -0.6519 | 0.0774  | 0.7763  | 1.3999  | 1.5421  | 1.9207  |
| PBANKA_120820 | -0.098  | -0.7383 | -0.1843 | 0.1944  | 0.0985  | 0.2971  | 0.4238  | 0.4477  | 0.3699  | 0.3827  | 0.3996  | 0.0096  |
| PBANKA_051530 | -0.4431 | -0.3423 | -0.2797 | 0.0375  | 0.1013  | 0.4388  | 0.336   | 0.7717  | 0.7556  | 0.8109  | -0.0507 | -0.2635 |
| PBANKA_110310 | -1.8415 | -0.7367 | -0.639  | -0.1296 | 0.0896  | 0.5678  | 0.4557  | 0.3993  | -0.3094 | -0.5282 | -1.3087 | -1.5009 |
| PBANKA_114240 | -1.4139 | -1.5998 | -0.6881 | -0.3518 | 0.3069  | 0.1737  | 0.7276  | 0.4978  | 0.4771  | 0.079   | -0.7648 | -0.47   |
| PBANKA_135830 | -0.1372 | -0.2829 | -0.2995 | -0.3009 | 0.1037  | 0.1363  | 0.1087  | 0.3812  | 0.3829  | 0.2771  | -0.1728 | -0.5426 |
| PBANKA_130830 | 0.2669  | 0.6568  | 0.1976  | 0.4961  | 0.347   | 0.2643  | 0.2022  | -0.456  | -0.0882 | -0.2468 | 0.0593  | 0.1482  |
| PBANKA_061990 | 0.6605  | 0.0241  | 0.2336  | 0.5859  | 0.2203  | 0.302   | -0.4113 | -0.5818 | -0.74   | -0.9794 | -0.2812 | -0.7378 |
| PBANKA_020660 | 0.3693  | 0.3657  | 0.0358  | -0.0658 | -0.066  | -0.5986 | -0.2643 | -0.0274 | 0.3544  | 0.3859  | 0.3629  | 0.9438  |
| PBANKA_123710 | -0.2204 | -0.364  | -0.4749 | -0.2925 | -0.0626 | -0.0969 | 0.1968  | 0.4393  | 0.4229  | 0.5309  | -0.1599 | -0.4523 |
| PBANKA_041410 | -0.5342 | -0.2196 | -0.5409 | -0.3755 | -0.1452 | -0.7084 | -0.1746 | -0.1679 | -0.4188 | -0.1736 | -0.1972 | 0.0034  |
| PBANKA_111080 | -0.0262 | 0.6227  | 0.0986  | 0.074   | -0.0364 | -0.0338 | 0.0313  | -0.2456 | -0.1239 | -0.0878 | -0.2832 | -0.3831 |
| PBANKA_112210 | 0.5133  | 0.6813  | 0.0422  | 0.3952  | 0.2554  | 0.1813  | 0.1048  | 0.1839  | 0.249   | 0.2917  | -0.3336 | 0.06    |
| PBANKA_030990 | 0.226   | -0.4985 | 0.2323  | 0.4155  | 0.4466  | 0.6257  | 0.1601  | -0.4194 | -0.6536 | -0.7933 | -0.4888 | -0.2882 |
| PBANKA_020420 | -0.9004 | -0.0289 | -0.3031 | 0.1201  | 0.0722  | 0.1646  | 0.2192  | -0.0382 | -0.1177 | -0.2645 | -0.4224 | -0.2012 |
| PBANKA_112200 | 0.3314  | 0.4288  | -0.0136 | 0.0777  | -0.1183 | -0.0437 | 0.01    | -0.1186 | 0.0394  | 0.1474  | 0.4561  | 0.2092  |
| PBANKA_103090 | 0.4762  | -0.6544 | 0.0753  | -0.0202 | 0.2189  | -0.3286 | 0.1922  | 0.025   | -0.7243 | -0.4871 | -0.6515 | -1.0748 |
| PBANKA_082490 | 0.0195  | 0.6376  | -0.0484 | -0.1751 | 0.068   | 0.1021  | -0.0741 | 0.145   | 0.1373  | 0.4017  | 0.3702  | 0.4438  |
| PBANKA_144520 | 0.3199  | -0.4164 | 0.1569  | 0.3217  | 0.0137  | -0.1842 | -0.2225 | -0.41   | -0.2757 | -0.0854 | -0.3696 | 1.0667  |
| PBANKA_130200 | -0.1061 | -0.1809 | 0.0228  | -0.1938 | -0.0938 | -0.4471 | -0.42   | -1.2399 | -0.8615 | -0.1953 | -1.1191 | 0.146   |
| PBANKA_102330 | 0.2106  | 0.2474  | 0.2149  | -0.3693 | 0.0333  | -0.024  | -0.395  | -0.134  | -0.5829 | -0.492  | -1.0517 | -0.9823 |
| PBANKA_131950 | -0.2439 | -0.9413 | -0.1712 | -0.4964 | 0.1095  | -0.374  | -0.174  | -0.4827 | -0.0701 | 0.0335  | 0.4798  | 0.9929  |
| PBANKA_020950 | 0.7763  | 0.2741  | 0.3994  | 0.5463  | 0.407   | -0.0479 | 0.052   | 0.1826  | -0.0555 | -0.4503 | -0.3759 | -0.2454 |
| PBANKA_091980 | -0.3107 | -0.2337 | 0.0535  | 0.0317  | 0.0049  | 0.0992  | 0.0475  | -0.2171 | -0.3035 | -0.8343 | -0.8524 | -0.5095 |
| PBANKA_103850 | 0.1789  | 0.2577  | 0.2859  | 0.4119  | 0.0741  | -0.0278 | 0.0868  | -0.1477 | 0.5724  | 0.3592  | 0.3972  | 0.7133  |
| PBANKA_093440 | -0.2604 | 0.1708  | -0.1498 | -0.4781 | -0.0824 | 0.2883  | -0.0092 | -0.2947 | -0.1365 | -0.0412 | -0.2138 | 0.7479  |
| PBANKA_081220 | -0.1713 | -0.447  | -0.2602 | -0.2118 | -0.2324 | -0.2988 | 0.1086  | 0.409   | 0.4333  | 0.9187  | 0.9506  | 0.6097  |
| PBANKA_122150 | 0.1624  | -0.3982 | 0.1842  | 0.2667  | 0.3789  | 0.5512  | 0.01    | 0.1238  | 0.2065  | 0.1865  | 0.5553  | 0.4173  |
| PBANKA_135370 | 0.1522  | 0.0393  | -0.2504 | -0.416  | -0.3029 | -0.3304 | -0.3953 | -0.0962 | 0.6183  | 0.9671  | 1.3507  | 1.2934  |
| PBANKA_101490 | 0.246   | 0.5486  | 0.1053  | -0.2321 | 0.2285  | 0.0373  | 0.0452  | -0.12   | 0.0618  | -0.1164 | -0.2783 | -0.3673 |
| PBANKA_061770 | -0.0713 | 0.5065  | -0.3586 | -0.0366 | 0.0682  | -0.1833 | -0.2055 | -0.3322 | -0.2825 | 0.022   | 0.4655  | 0.5363  |
| PBANKA_091620 | -0.1025 | 0.4265  | 0.424   | 0.0691  | 0.28    | 0.1007  | -0.1705 | -0.7743 | -0.9466 | -1.147  | -0.7232 | -0.9849 |
| PBANKA_070600 | 0.6367  | 0.0146  | 0.2709  | 0.3758  | -0.0592 | 0.0083  | -0.1059 | -0.3311 | -0.2129 | 0.087   | -0.5326 | -0.138  |

|               |         |         |         |         |         |         |         |         |         |         |         |         |
|---------------|---------|---------|---------|---------|---------|---------|---------|---------|---------|---------|---------|---------|
| PBANKA_030740 | 0.2447  | 0.5323  | 0.0243  | 0.0616  | -0.1128 | -0.0997 | -0.1607 | -0.3437 | 0.2457  | 0.1624  | 0.0668  | -0.4227 |
| PBANKA_083290 | -0.9544 | -0.4924 | -0.7094 | 0.0746  | -0.2253 | 0.2197  | 0.2881  | 0.5453  | 0.8911  | 0.9199  | 0.0759  | -0.0481 |
| PBANKA_041090 | 0.1856  | 0.63    | 0.0311  | 0.3905  | 0.5017  | 0.0794  | 0.1379  | 0.17    | 0.2828  | -0.2622 | 0.5014  | 0.0289  |
| PBANKA_144570 | 0.2642  | -0.209  | 0.1938  | 0.4778  | 0.0961  | 0.143   | -0.0921 | -0.2777 | -0.2405 | -0.0863 | 0.0387  | -0.1522 |
| PBANKA_141300 | 0.002   | -0.2471 | 0.2004  | 0.6862  | 0.3284  | 0.2678  | 0.1926  | -0.018  | -0.0749 | -0.4291 | -0.6879 | -0.7072 |
| PBANKA_130680 | 0.3189  | 0.4604  | 0.3434  | 0.1709  | 0.0664  | 0.1812  | 0.0582  | -0.214  | -0.4254 | -0.2463 | -0.541  | -0.7622 |
| PBANKA_141570 | 0.0436  | 0.1317  | 0.1096  | -0.1541 | 0.0366  | 0.2283  | 0.2127  | 0.1971  | -0.0643 | -0.0477 | -0.0845 | -0.7351 |
| PBANKA_071930 | -0.732  | 0.2088  | -0.415  | 0.0455  | 0.2778  | 0.2872  | 0.1585  | -0.0157 | -0.3216 | 0.2105  | -0.1632 | -0.5142 |
| PBANKA_011240 | -0.1756 | -1.2636 | -0.3909 | -0.0306 | 0.7139  | -0.1635 | -0.021  | -0.117  | 0.2028  | 0.2629  | -0.0345 | -0.1563 |
| PBANKA_071480 | 0.1555  | -1.1744 | -0.3491 | -0.1105 | -0.1607 | -0.9177 | -0.3513 | -0.8279 | -0.4002 | -0.6812 | -0.4004 | -0.2061 |
| PBANKA_030900 | -0.4238 | 0.0413  | 0.0935  | 0.2682  | 0.1717  | 0.6331  | 0.172   | -0.2822 | -0.4395 | -0.5588 | -0.389  | -1.1536 |
| PBANKA_060850 | -0.1211 | -0.039  | -0.0255 | 0.0007  | 0.077   | -0.9437 | 0.5761  | 0.7247  | 0.7497  | 0.827   | 0.312   | 0.6757  |
| PBANKA_110450 | -1.2399 | -0.7836 | -0.8663 | -0.25   | -0.0592 | 0.2238  | 0.4702  | 0.4466  | 0.6683  | 0.5228  | 0.0305  | 0.2957  |
| PBANKA_141410 | -0.5661 | -0.6239 | -0.23   | 0.2065  | 0.3439  | 0.4321  | 0.0968  | 0.2892  | 0.3725  | 0.3954  | 1.1698  | 0.5696  |
| PBANKA_143210 | 0.6002  | 0.1491  | 0.1217  | 0.5476  | 0.097   | 0.4424  | -0.1176 | -0.3331 | -0.135  | -0.2429 | -0.0988 | -0.2562 |
| PBANKA_103920 | -0.4403 | -0.4861 | -0.2521 | -0.9953 | -0.1283 | 0.5574  | 0.6078  | 0.8206  | 0.8992  | 0.8971  | 0.0083  | -0.1848 |
| PBANKA_141450 | -0.0251 | -0.1403 | -0.047  | -0.0448 | -0.197  | -0.1315 | -0.4854 | -0.0616 | 0.1187  | 0.3585  | 0.4354  | 1.3807  |
| PBANKA_134960 | 0.1701  | 0.5223  | 0.235   | 0.0103  | 0.3332  | 0.1912  | 0.0272  | -0.1716 | -0.1544 | -0.294  | -0.4547 | -0.6056 |
| PBANKA_123530 | -0.4851 | 0.1467  | 0.2289  | 0.1227  | 0.0233  | 0.3082  | 0.132   | 0.0831  | 0.1414  | -0.259  | -1.1523 | -0.8555 |
| PBANKA_136070 | 0.0204  | 0.2831  | -0.2402 | -0.2731 | -0.1833 | 0.0042  | 0.2423  | 0.3107  | 0.3113  | 0.3606  | 0.1598  | 0.0402  |
| PBANKA_142290 | -0.3644 | 0.2591  | -0.5305 | -0.6659 | -0.55   | -0.2889 | -0.5221 | -0.1952 | -0.0255 | 0.2892  | 1.3572  | 1.5836  |
| PBANKA_132320 | -0.1223 | -0.0326 | -0.2299 | 0.1192  | 0.2289  | -0.1899 | -0.3831 | -0.2774 | -1.054  | -0.2057 | -0.6704 | -0.8198 |
| PBANKA_041660 | -1.0293 | -0.1586 | -0.4877 | -0.283  | -0.1192 | 0.1638  | -0.457  | -0.2547 | -0.5547 | -0.272  | -0.2507 | -0.4794 |
| PBANKA_070790 | -0.4224 | -1.0617 | -0.1126 | -0.2001 | 0.0562  | 0.0539  | 0.3926  | 0.3742  | 0.3844  | 0.3419  | -0.1367 | -0.2434 |
| PBANKA_143480 | 0.0854  | -0.1656 | 0.5704  | -0.1145 | 0.2357  | 0.0068  | -0.2618 | -0.1173 | -0.1201 | -0.0277 | 0.0344  | -1.0205 |
| PBANKA_103950 | -0.4224 | 0.0643  | 0.2819  | -0.2437 | -0.1889 | -0.0329 | 0.2767  | 0.3927  | -0.1771 | -0.1431 | -0.4823 | -1.2153 |
| PBANKA_122180 | 0.2706  | 0.4604  | 0.0452  | 0.1665  | 0.2423  | 0.7334  | -0.2311 | 0.0378  | -0.3367 | -0.3315 | -0.1672 | 0.0738  |
| PBANKA_081990 | 0.0886  | -0.2447 | 0.0466  | 0.202   | 0.122   | -0.0107 | -0.1266 | -0.1718 | 0.1293  | -0.1425 | 0.0341  | 0.7264  |
| PBANKA_120420 | -0.3368 | -0.1447 | -0.9331 | 0.1913  | -0.4712 | -0.6332 | -0.4325 | 0.1268  | 0.5987  | 0.837   | 1.0309  | 1.6004  |
| PBANKA_144720 | -0.2538 | 0.1662  | -0.0818 | 0.0541  | -0.0621 | -0.0063 | 0.3847  | 0.529   | 0.4542  | 0.6886  | -0.3293 | 0.7738  |
| PBANKA_070450 | 0.2916  | 0.5566  | 0.0732  | -0.6219 | 0.0867  | -0.0187 | -0.2933 | -0.1954 | -0.5034 | -0.2869 | -0.0176 | -0.1366 |
| PBANKA_040710 | 0.3456  | 0.7142  | 0.0368  | -0.189  | 0.1017  | 0.392   | 0.0556  | 0.1272  | -0.1021 | -0.2715 | -0.5001 | -0.0003 |
| PBANKA_142640 | -0.4324 | 0.5658  | -0.6091 | -0.3778 | -0.5894 | -0.5155 | -0.4959 | -0.3839 | -0.7432 | -0.4012 | -0.8925 | -1.0265 |
| PBANKA_143550 | -0.0582 | -0.3025 | -0.1039 | -0.227  | -0.0788 | -0.0123 | 0.4085  | 0.3219  | 0.3251  | 0.2375  | -0.1913 | -0.4302 |
| PBANKA_060210 | -0.1539 | -1.1163 | 0.2327  | 0.4367  | -0.1027 | 0.3818  | 0.4122  | 0.3643  | -0.2164 | -0.4722 | -0.9352 | -0.8482 |
| PBANKA_136200 | 0.5578  | 0.3694  | 0.6556  | -0.2125 | 0.0297  | 0.2862  | 0.1556  | -0.4014 | -0.2821 | -0.1798 | -0.4847 | 0.2587  |
| PBANKA_051160 | 0.0546  | 0.6396  | 0.2657  | 0.3207  | 0.1538  | 0.1664  | 0.0505  | -0.102  | -0.6106 | -0.5482 | -0.4275 | -0.319  |
| PBANKA_010860 | 0.376   | 0.2584  | 0.4381  | 0.4983  | 0.257   | 0.4211  | 0.0108  | 0.0482  | -0.2423 | -0.5694 | -0.8921 | -0.9817 |
| PBANKA_090180 | 0.0446  | -0.0703 | -0.1277 | -0.1064 | 0.2198  | 0.1507  | 0.0539  | 0.0806  | -0.0963 | 0.0082  | -0.4981 | -0.2502 |
| PBANKA_144310 | 0.3791  | -0.5519 | 0.0982  | -0.0306 | 0.1282  | -0.1693 | 0.5171  | -0.1002 | -0.1613 | 0.1601  | 0.1941  | 0.0223  |
| PBANKA_132840 | -0.9541 | -0.2544 | -0.3442 | -0.1094 | -0.1403 | 0.3318  | 0.2091  | 0.1679  | 0.027   | -0.2288 | -0.8666 | -0.5841 |
| PBANKA_135230 | 0.1013  | -0.0402 | 0.3056  | 0.1945  | 0.4592  | 0.2897  | 0.1187  | -0.047  | -0.4809 | -0.8394 | -1.8033 | -1.5647 |
| PBANKA_082600 | 0.3324  | 0.2972  | 0.2184  | 0.1407  | 0.6188  | 0.2606  | 0.1251  | 0.1719  | 0.427   | 0.0874  | 0.3221  | 0.4568  |
| PBANKA_114090 | 0.1942  | 0.1499  | 0.0782  | 0.405   | 0.1735  | 0.1015  | -0.255  | -0.3025 | -0.9706 | -0.9613 | -0.9427 | -0.5738 |
| PBANKA_021430 | 0.0023  | 0.427   | 0.41    | -0.0233 | -0.0395 | 0.7201  | -0.2492 | -0.22   | -0.1675 | -0.3267 | -0.1092 | -0.5522 |
| PBANKA_080190 | 0.4737  | 0.3915  | 0.1909  | 0.2972  | 0.1532  | -0.1947 | 0.0869  | -0.2345 | -0.2126 | -0.4153 | -0.3094 | -0.209  |
| PBANKA_081660 | -0.0021 | 0.3914  | 0.2538  | -0.2026 | 0.1329  | 0.0067  | -0.0289 | 0.0254  | 0.4482  | 0.0657  | 0.3305  | 0.541   |
| PBANKA_120590 | 0.0035  | 0.1801  | -0.0059 | -0.3791 | 0.1825  | -0.6099 | -0.3463 | -0.3104 | -0.0962 | 0.134   | 0.5842  | 0.7345  |
| PBANKA_113800 | -0.295  | -0.8691 | -0.3268 | -0.0134 | 0.2788  | 0.7085  | 0.5178  | 0.1716  | 0.2436  | 0.0515  | -0.5774 | -0.5485 |
| PBANKA_101960 | 0.5914  | 0.4213  | 0.1196  | 0.195   | 0.0042  | -0.1134 | -0.0497 | -0.1072 | 0.0631  | -0.2073 | 0.1551  | 0.1588  |
| PBANKA_121650 | -0.2161 | 0.3415  | 0.7588  | 0.0365  | 0.7752  | 0.1806  | -0.1567 | -0.821  | -1.6848 | -1.9762 | -1.5342 | -2.2872 |
| PBANKA_130950 | 0.4718  | 0.1167  | 0.3205  | 0.3018  | 0.0559  | -0.2212 | -0.2558 | -0.7656 | -0.3661 | -0.503  | 0.291   | 0.2171  |
| PBANKA_091160 | -0.3048 | 0.3785  | -0.2685 | -0.4853 | 0.0811  | 0.3838  | -0.122  | -0.1538 | -0.2782 | -0.4086 | -0.4969 | -0.3923 |
| PBANKA_080730 | 0.1329  | 0.8195  | 0.1616  | 0.4782  | 0.297   | 0.2421  | -0.1049 | -0.2798 | -0.3125 | -0.4273 | -0.1846 | -0.2886 |
| PBANKA_080860 | -0.5859 | 0.0976  | -0.2168 | 0.2917  | 0.0225  | 0.0972  | 0.1171  | 0.3283  | 0.4767  | 0.3419  | 0.9905  | 0.3203  |
| PBANKA_041180 | 0.1075  | 0.5558  | 0.5198  | 0.0013  | 0.1783  | -0.134  | -0.1991 | -0.3569 | -0.4981 | -0.4851 | 0.0121  | -0.2366 |
| PBANKA_101380 | -0.3842 | -1.0582 | -0.3095 | -0.0126 | 0.1295  | 0.6119  | 0.4255  | 0.3702  | -0.0433 | 0.0066  | -0.931  | -0.9988 |
| PBANKA_100310 | 0.3052  | 0.8099  | 0.3454  | -0.061  | 0.1013  | 0.0833  | -0.1648 | -0.1125 | -0.4336 | -0.3233 | 0.1294  | 0.0398  |
| PBANKA_040150 | -0.1245 | -0.0526 | -0.0192 | 0.0219  | 0.07    | -0.2416 | 0.3245  | 0.2162  | -0.2728 | -0.3204 | -0.7269 | -0.9055 |
| PBANKA_102460 | -0.0155 | -0.1    | 0.0777  | 0.4462  | 0.3488  | 0.5324  | 0.112   | 0.0768  | 0.3011  | -0.3702 | -0.8874 | -0.4528 |
| PBANKA_132440 | 0.1782  | 0.4931  | 0.2913  | 0.4435  | -0.0201 | 0.2201  | -0.3041 | -0.5947 | -0.4807 | -0.879  | -0.4537 | 0.3574  |
| PBANKA_143610 | -0.4079 | 0.1738  | -0.1438 | -0.2694 | 0.1328  | -0.6437 | 0.0394  | 0.6973  | 0.266   | 0.2961  | -0.0522 | -0.6046 |
| PBANKA_100740 | -0.123  | -0.2606 | -0.2831 | -0.4341 | -0.5879 | -0.4607 | -0.3426 | 0.1423  | 0.5947  | 0.9461  | 1.1087  | 0.8768  |

|               |         |         |         |         |         |         |         |         |         |         |         |         |
|---------------|---------|---------|---------|---------|---------|---------|---------|---------|---------|---------|---------|---------|
| PBANKA_112020 | 0.1505  | -0.0561 | 0.3659  | 0.6695  | -0.1766 | 0.3533  | -0.3461 | -0.6984 | -0.5039 | -0.6432 | -0.2463 | -0.4713 |
| PBANKA_010530 | 0.5576  | 0.9766  | 0.1285  | 0.0425  | -0.0109 | -0.3122 | 0.1661  | -0.2451 | -0.0164 | 0.1374  | 0.1762  | 0.3697  |
| PBANKA_142150 | -0.4587 | -0.248  | -0.195  | -0.33   | -0.2187 | -0.0806 | -0.4029 | 0.0519  | 0.4667  | 0.7157  | 1.0904  | 1.3892  |
| PBANKA_102090 | 0.3401  | 0.4053  | -0.1642 | 0.339   | -0.0019 | 0.7034  | 0.2783  | 0.2578  | -0.1443 | -0.0472 | 0.0037  | 0.3043  |
| PBANKA_133720 | -0.1286 | 0.2136  | 0.0681  | -0.0055 | 0.0545  | 0.1747  | 0.0113  | 0.091   | 0.319   | 0.399   | 0.2026  | 0.1443  |
| PBANKA_081610 | 0.0085  | -0.0396 | 0.062   | 0.2906  | 0.2821  | 0.1935  | 0.5179  | -0.1296 | -0.3623 | -0.7187 | -1.0286 | -1.5225 |
| PBANKA_102080 | -0.09   | -0.376  | -0.2246 | -0.0612 | -0.5805 | -0.4426 | -0.0552 | -0.5078 | -0.5637 | 0.0163  | 0.0028  | -0.0396 |
| PBANKA_143720 | -0.3045 | -0.0478 | -0.1487 | 0.3951  | 0.1091  | -0.6261 | -0.2339 | -0.6062 | -1.0691 | -0.855  | -1.0467 | -0.728  |
| PBANKA_102880 | -0.0903 | 0.2546  | -0.1103 | 0.0345  | 0.03    | -0.2437 | 0.1811  | -0.172  | 0.1197  | -0.3946 | -0.4911 | 0.0905  |
| PBANKA_134100 | 0.1212  | -0.4282 | 0.0833  | 0.2495  | 0.3607  | 0.0137  | 0.2186  | 0.3873  | 0.4639  | 0.4249  | 0.3464  | 0.285   |
| PBANKA_113610 | -0.1934 | 0.0462  | 0.18    | -0.3302 | -0.2108 | -0.488  | -0.0216 | -0.237  | 0.0621  | -0.3701 | -0.7941 | -0.6869 |
| PBANKA_136230 | -0.1775 | -0.0737 | -0.1202 | 0.0324  | 0.1419  | 0.2601  | 0.3879  | 0.5292  | 0.3646  | 0.3677  | -0.2739 | -0.5861 |
| PBANKA_146420 | -0.5517 | -0.396  | -0.2991 | 0.1997  | 0.2923  | 0.6827  | 0.5492  | 0.0922  | -0.0771 | -0.2939 | -0.9042 | -0.75   |
| PBANKA_114330 | 0.4321  | 0.6835  | -0.3413 | -0.0981 | -0.2544 | 0.0656  | -0.3066 | 0.2658  | 0.6187  | 0.6222  | 1.2632  | 1.7314  |
| PBANKA_060150 | 0.1905  | 0.1966  | 0.2481  | 0.0707  | -0.0865 | 0.3452  | 0.0657  | 0.066   | 0.1964  | 0.0978  | -0.3775 | -0.0538 |
| PBANKA_134460 | 0.1175  | -0.2093 | 0.202   | -0.076  | -0.2043 | 0.1236  | 0.3409  | -0.0917 | -0.0215 | 0.2296  | 0.1612  | 0.3371  |
| PBANKA_134500 | -0.286  | -0.4801 | 0.2072  | 0.3311  | 0.2364  | 0.8881  | -0.0581 | -0.466  | -0.5953 | -0.8299 | -0.3693 | -0.4201 |
| PBANKA_041150 | -0.0993 | -0.2459 | 0.1515  | 0.1618  | 0.0446  | 0.0707  | 0.4163  | 0.1482  | 0.0184  | -0.2606 | -0.8317 | -0.5012 |
| PBANKA_103610 | 0.2521  | 0.5047  | 0.2743  | 0.5187  | 0.4469  | 0.3174  | 0.1111  | 0.06    | -0.1095 | -0.1285 | 0.285   | 0.399   |
| PBANKA_133420 | 0.2492  | 0.0817  | 0.0771  | 0.2532  | -0.1247 | 0.0042  | -0.2422 | -0.3842 | 0.2054  | 0.1265  | 0.3547  | 1.2844  |
| PBANKA_050250 | -0.2688 | 0.6406  | -0.0832 | -0.2199 | -0.0228 | -0.2294 | -0.0665 | 0.4106  | 0.5032  | 0.6486  | 0.5535  | 0.1215  |
| PBANKA_142440 | -0.4704 | 0.1574  | -0.1116 | 0.0286  | 0.247   | 0.2857  | -0.0659 | 0.0023  | -0.4148 | -0.7476 | -0.537  | -1.3106 |
| PBANKA_094350 | 0.5537  | 0.1557  | 0.2796  | 0.0209  | -0.0631 | 0.3694  | -0.1071 | -0.4533 | -0.3888 | -0.1447 | 0.2898  | 0.1209  |
| PBANKA_081810 | 0.7345  | -0.4893 | 0.3167  | 0.695   | 0.7022  | -0.1641 | -0.0787 | 0.0997  | 0.4713  | -0.1599 | -0.2352 | -0.847  |
| PBANKA_052380 | -2.0973 | -1.2533 | -1.9725 | -1.5271 | -1.0899 | 0.0325  | 0.668   | 0.8026  | 1.2798  | 1.4163  | 0.437   | 0.0092  |
| PBANKA_124110 | -0.8659 | -0.7962 | -0.5573 | -0.0709 | -0.3487 | 0.4473  | 0.4922  | 0.4774  | 0.2049  | 0.1536  | -0.6438 | -0.2764 |
| PBANKA_120170 | 0.3957  | 0.1643  | 0.0986  | 0.3776  | 0.0993  | 0.001   | -0.4017 | -0.6358 | -0.6518 | -0.4478 | -0.3943 | 0.5794  |
| PBANKA_123920 | 0.4913  | -0.563  | 0.0766  | 0.4248  | -0.198  | 0.7641  | 0.0154  | -0.3385 | -0.079  | -0.3655 | -0.0116 | 0.0504  |
| PBANKA_134800 | 0.0646  | 0.1416  | 0.4537  | 0.0322  | -0.2101 | -0.2005 | 0.142   | -0.077  | -0.4313 | -0.3627 | -0.8285 | -0.2729 |
| PBANKA_122790 | 0.4627  | 0.4166  | -0.1998 | -0.4461 | 0.3217  | -1.848  | -0.1641 | -0.3256 | 0.3048  | -0.1294 | 0.6185  | 0.8058  |
| PBANKA_021020 | 0.0101  | 0.5607  | 0.0524  | -0.2179 | -0.1809 | -0.2467 | -0.3305 | -0.229  | -0.5124 | -0.1706 | 0.6508  | 1.0766  |
| PBANKA_021130 | 0.0916  | -0.4882 | 0.1035  | 0.4507  | -1.5203 | 0.6855  | 0.1719  | 0.0054  | -0.14   | -0.1463 | -0.3779 | -0.6151 |
| PBANKA_113930 | -0.1255 | 0.1239  | -0.1543 | 0.052   | -0.0546 | 0.1718  | -0.1714 | -0.4153 | -0.603  | -0.7824 | -0.775  | -0.7949 |
| PBANKA_102900 | -0.5244 | -0.279  | -0.4799 | -0.3797 | -0.4392 | -0.5043 | 0.0533  | 0.6187  | 0.9415  | 1.3305  | 0.9064  | 0.9999  |
| PBANKA_100160 | -0.6179 | -0.3176 | -0.4163 | -0.1357 | -0.0069 | 0.526   | 0.2732  | 0.1948  | 0.4854  | 0.2373  | 0.057   | -0.1417 |
| PBANKA_052320 | -0.405  | -0.2248 | -0.0297 | 0.1311  | 0.3154  | 0.4472  | 0.2674  | -0.0049 | 0.0179  | -0.3118 | 0.301   | 0.1033  |
| PBANKA_135100 | 0.4892  | 0.0959  | 0.3175  | 0.5817  | 0.0626  | 0.3313  | 0.0225  | -0.0377 | 0.1882  | 0.2864  | 0.2026  | 0.0462  |
| PBANKA_113290 | 0.1252  | 0.1519  | -0.4114 | -0.2864 | -0.2019 | -0.1797 | 0.0112  | 0.6156  | 0.2869  | 0.5128  | -0.244  | 0.0364  |
| PBANKA_010710 | -0.4418 | -0.2838 | 0.1422  | 0.3743  | 0.4987  | 0.2727  | 0.0087  | -0.5158 | -0.713  | -1.3361 | -1.7595 | -2.08   |
| PBANKA_092330 | -0.2464 | -0.1153 | -0.2655 | 0.5625  | 0.4301  | 0.4374  | 0.2604  | 0.1886  | 0.1467  | -0.1029 | -0.2855 | 0.4174  |
| PBANKA_112910 | 0.0512  | -0.4574 | -0.0262 | 0.201   | 0.1997  | 0.2174  | 0.0038  | -0.1625 | -0.1963 | 0.0731  | -0.0083 | 0.0575  |
| PBANKA_041070 | 0.3812  | 0.4528  | 0.663   | -0.2901 | 0.5327  | 0.9134  | -0.0424 | -0.3095 | -0.1405 | -0.1546 | -0.1407 | -0.9197 |
| PBANKA_144220 | -0.2729 | 0.1552  | -0.2974 | -0.1878 | 0.1538  | -0.2754 | 0.075   | -0.0241 | 0.0939  | 0.1705  | 0.2222  | -0.331  |
| PBANKA_140910 | 0.0165  | 0.566   | 0.1986  | 0.2575  | 0.4169  | 0.243   | 0.0033  | -0.1618 | -0.4376 | -0.5664 | -0.3698 | -0.8563 |
| PBANKA_133390 | 0.521   | 0.334   | 0.3301  | 0.9307  | 0.4003  | 0.1727  | -0.0303 | -0.0673 | 0.0974  | -0.3202 | -0.5814 | -0.623  |
| PBANKA_123840 | -1.1114 | -0.5114 | -0.314  | 0.0955  | 0.1701  | -0.1286 | 0.224   | 0.1478  | 0.1306  | -0.0809 | -0.253  | -0.2649 |
| PBANKA_030550 | 0.5891  | 0.6114  | 0.4467  | 0.4658  | 0.1074  | -0.0462 | 0.1063  | -0.3667 | -0.3004 | -0.1286 | -0.2    | -0.1466 |
| PBANKA_124230 | 0.2815  | 0.8388  | 0.4371  | 0.0022  | -0.3131 | 0.3302  | -0.0226 | -0.3973 | -0.5428 | -0.8931 | -0.9618 | -0.233  |
| PBANKA_131820 | 0.0352  | -0.6647 | -0.0761 | 0.2255  | 0.029   | 0.0903  | 0.124   | 0.1308  | -0.0045 | -0.1972 | -0.3661 | 0.3254  |
| PBANKA_040570 | 0.2992  | -0.2238 | 0.2233  | 0.3881  | 0.0787  | -0.3389 | 0.0919  | -0.1092 | 0.0532  | -0.202  | -0.0082 | 0.2623  |
| PBANKA_100600 | -0.0274 | 0.039   | 0.2176  | 0.1008  | 0.166   | -0.1325 | 0.1928  | 0.1024  | -0.1975 | -0.3252 | -0.4824 | -0.2755 |
| PBANKA_100020 | 0.3068  | 0.246   | -0.0729 | 0.3144  | 0.2509  | -0.8767 | 0.0326  | -0.1488 | -0.0262 | 0.0399  | 0.8588  | 1.2122  |
| PBANKA_100890 | 0.1285  | 0.0388  | -0.0195 | 0.2767  | 0.4172  | 0.884   | 0.1788  | -0.4241 | -0.4168 | -0.2155 | -0.1044 | -0.4516 |
| PBANKA_132850 | -0.1623 | -0.2133 | -0.2114 | -0.0649 | -0.8023 | 0.5609  | -0.0737 | -0.2701 | -0.3502 | -0.5316 | -0.8439 | -0.3255 |
| PBANKA_134180 | 0.2604  | 0.0448  | 0.1758  | 0.2871  | 0.1184  | -0.2053 | -0.0121 | -0.1001 | 0.2207  | -0.0922 | -0.3634 | -0.4504 |
| PBANKA_031210 | -0.8326 | -0.0845 | -0.5467 | -0.6794 | -0.5628 | -0.3467 | 0.2078  | 0.3172  | 0.42    | 0.4439  | 0.2078  | -0.1621 |
| PBANKA_123150 | -0.0261 | 0.6072  | 0.4596  | -0.1201 | 0.3953  | -0.1391 | -0.4177 | -0.5473 | -0.7845 | -0.8368 | -0.7261 | -0.3494 |
| PBANKA_021560 | 0.5306  | 0.3     | 0.3309  | 0.0699  | 0.0645  | 0.0174  | -0.3993 | -0.3909 | -0.0572 | -0.0359 | 0.6028  | 0.6358  |
| PBANKA_092820 | 0.5289  | 0.5312  | 0.3176  | 0.297   | 0.3765  | 0.2539  | -0.254  | -0.0763 | 0.0231  | 0.1191  | -0.051  | 0.6217  |
| PBANKA_146350 | 0.062   | 0.6879  | 0.2124  | -0.2928 | 0.2093  | -0.1941 | 0.0053  | -0.0487 | 0.1812  | 0.0891  | 0.1576  | 0.8245  |
| PBANKA_100320 | -0.2344 | 0.311   | -0.0241 | 0.053   | -0.1397 | -0.0594 | -0.1954 | -0.4759 | -0.5138 | -0.1551 | -0.4139 | 0.5635  |
| PBANKA_124050 | -0.0056 | 0.3147  | 0.48    | 0.3318  | 0.2841  | 0.3535  | 0.213   | -0.1275 | -0.19   | -0.2859 | -0.4492 | -0.9712 |
| PBANKA_135510 | 0.7868  | 0.3886  | 0.6177  | 0.4466  | 0.3698  | -0.2806 | -0.072  | -0.901  | -0.7076 | -1.2828 | -0.2567 | -0.4845 |

|               |         |         |         |         |         |         |         |         |         |         |         |         |
|---------------|---------|---------|---------|---------|---------|---------|---------|---------|---------|---------|---------|---------|
| PBANKA_081640 | 0.0517  | 0.8313  | 0.3304  | -0.4095 | -0.7841 | 0.0391  | -0.1206 | -0.4487 | -0.6631 | -0.3821 | -0.0557 | 0.2812  |
| PBANKA_144560 | 0.3817  | -0.3771 | -0.0402 | -0.4024 | -0.3862 | -0.5626 | -0.4728 | 0.1791  | 0.2619  | 0.6336  | 0.3651  | 0.6913  |
| PBANKA_094340 | -0.3312 | -0.5525 | -0.414  | -0.0478 | -0.217  | -0.7202 | -0.3021 | -0.0277 | 0.396   | 0.5353  | 1.1992  | 1.5184  |
| PBANKA_130390 | -0.081  | -0.8924 | -0.0046 | 0.1207  | 0.1226  | -0.2781 | 0.1313  | 0.7461  | 0.3178  | 0.5182  | -0.148  | 0.3485  |
| PBANKA_102920 | -0.0852 | -0.5388 | 0.163   | 0.1761  | 0.3824  | -0.4125 | 0.323   | 0.0938  | -0.053  | -0.127  | -0.8445 | -0.4799 |
| PBANKA_140620 | 0.1511  | 0.0096  | -0.1326 | 0.0342  | -0.0121 | -0.1485 | 0.1926  | 0.0386  | 0.2559  | 0.2757  | -0.0595 | 0.2526  |
| PBANKA_021070 | 0.2711  | 0.5686  | 0.1146  | -0.0613 | 0.2122  | 0.3058  | 0.0953  | 0.1574  | 0.0994  | 0.0902  | 0.1936  | -0.3514 |
| PBANKA_050240 | 0.4434  | 0.9149  | 0.3458  | 0.3939  | 0.3431  | 0.389   | 0.062   | -0.1011 | 0.0809  | 0.0339  | -0.3384 | 0.7971  |
| PBANKA_030830 | -0.6555 | -0.0387 | -0.3046 | -0.3467 | 0.014   | 0.345   | -0.0574 | 0.4051  | 0.3595  | 0.4455  | -0.2128 | -0.3104 |
| PBANKA_145340 | -0.5153 | -0.9088 | -0.0698 | -0.4199 | -0.1531 | -0.365  | 0.0399  | 0.3392  | 0.6914  | 0.7141  | 0.3162  | 0.4318  |
| PBANKA_060350 | 0.1474  | 0.1721  | 0.2482  | 0.1164  | 0.0365  | 0.3673  | 0.1792  | -0.0212 | -0.109  | -0.3592 | -0.4242 | -0.0029 |
| PBANKA_010390 | 0.1976  | 0.2726  | -0.1102 | -0.5914 | -0.0931 | -0.6713 | -0.2724 | 0.397   | -0.4804 | -0.0497 | 0.8604  | 0.3373  |
| PBANKA_041690 | 0.4099  | 0.3829  | 0.2338  | 0.5613  | 0.2224  | 0.3353  | -0.1498 | -0.4248 | -0.8384 | -0.8397 | -1.077  | -1.2814 |
| PBANKA_070440 | -0.093  | -0.4137 | 0.0144  | 0.1846  | 0.2581  | 0.6535  | 0.5076  | 0.6347  | 0.6562  | 0.5272  | 0.3829  | -1.4936 |
| PBANKA_135550 | 0.2994  | 0.6353  | 0.0344  | 0.2598  | 0.4808  | 0.0148  | -0.4166 | -0.5472 | -0.8893 | -0.7955 | -0.4534 | -0.3548 |
| PBANKA_131710 | -0.2352 | 0.1058  | 0.1062  | 0.3482  | 0.0312  | 0.3454  | 0.0764  | 0.1804  | -0.1795 | -0.1052 | 0.0131  | 0.0027  |
| PBANKA_071850 | -0.1329 | -0.3029 | -0.197  | 0.1302  | 0.1127  | -0.0472 | -0.2687 | -0.1938 | -0.3897 | 0.0217  | -0.8309 | -0.4728 |
| PBANKA_091180 | 0.5217  | 0.2674  | 0.3541  | 0.2108  | 0.2551  | 0.0714  | 0.0157  | 0.0122  | -0.1967 | -0.2663 | -0.2803 | -0.5858 |
| PBANKA_093350 | -0.5545 | -0.5549 | -0.6538 | -0.2934 | -0.5156 | -0.095  | -0.0408 | 0.0248  | 0.2335  | 0.1106  | -0.3683 | -0.3345 |
| PBANKA_121700 | 0.2865  | -0.0342 | 0.0056  | 0.106   | 0.1987  | 0.2219  | -0.1504 | -0.4438 | -0.662  | -0.6849 | -0.751  | -0.3835 |
| PBANKA_092290 | 0.2184  | 0.6536  | 0.3284  | 0.1558  | -0.0891 | -0.0299 | -0.026  | -0.0871 | -0.2685 | -0.3858 | 0.0714  | 0.5008  |
| PBANKA_121510 | -0.4846 | 0.2596  | -0.3219 | -0.0522 | -0.3282 | -0.8758 | 0.138   | 0.3911  | 0.6018  | 0.8765  | 0.8398  | 0.1851  |
| PBANKA_051270 | -0.7575 | -1.0684 | -0.4687 | -0.1076 | -0.0559 | -0.0984 | 0.5346  | 0.7006  | 0.7217  | 0.7571  | -0.0703 | -0.1621 |
| PBANKA_130190 | -0.3051 | 0.2544  | -0.3348 | -0.4419 | -0.0159 | -0.4721 | 0.3665  | 0.2224  | 0.1378  | 0.2673  | -0.676  | -0.3119 |
| PBANKA_111650 | 0.3308  | 0.6939  | 0.3055  | 0.1004  | 0.0729  | -0.1127 | -0.0106 | -0.1264 | -0.2334 | -0.3372 | -0.234  | -0.3071 |
| PBANKA_031530 | 0.2612  | 0.3138  | 0.1965  | 0.5025  | 0.2983  | -0.2131 | -0.1457 | -0.0532 | 0.1443  | 0.1179  | -0.2103 | 0.0451  |
| PBANKA_052410 | -0.405  | 0.0194  | 0.1287  | -0.68   | -0.2702 | -0.2509 | -0.457  | -0.0505 | 0.6325  | 0.7862  | 0.8872  | 1.7165  |
| PBANKA_052360 | -0.399  | -0.2506 | 0.0418  | 0.3787  | 0.4613  | 0.1421  | 0.2974  | 0.1097  | -0.2417 | -0.7144 | -0.9045 | -0.6165 |
| PBANKA_146180 | -0.5705 | -0.3444 | -0.2189 | -0.0348 | 0.3332  | 0.2639  | 0.279   | 0.019   | -0.4753 | -0.6653 | -0.9951 | -1.2826 |
| PBANKA_010750 | 0.7061  | -0.0732 | 0.5542  | 0.5779  | 0.272   | 0.8704  | 0.2502  | 0.4976  | -0.2068 | -0.3778 | 0.0338  | -0.5661 |
| PBANKA_124390 | -0.7577 | -0.3858 | -0.4799 | -0.0742 | 0.065   | 0.1001  | 0.2385  | 0.6603  | 0.5619  | 0.7958  | 0.102   | -0.6198 |
| PBANKA_060660 | 0.2948  | 0.6379  | 0.0461  | -0.0494 | 0.0633  | -0.4864 | -0.5752 | -0.4478 | -0.1726 | 0.1802  | 0.7565  | 1.264   |
| PBANKA_091820 | 0.2771  | 1.2553  | 0.299   | 0.0182  | -0.0276 | 0.016   | -0.026  | -0.0512 | 0.2317  | 0.4859  | 0.3446  | 0.3567  |
| PBANKA_130260 | -0.2723 | -0.2322 | -0.077  | 0.2164  | 0.2186  | 0.0963  | 0.2889  | 0.2652  | 0.0985  | -0.0231 | -0.2985 | -0.5661 |
| PBANKA_100650 | -0.157  | 0.1436  | -0.2226 | -0.1213 | -0.2179 | 0.5396  | -0.2951 | -0.4875 | -0.6415 | -0.6137 | -0.6981 | -0.5179 |
| PBANKA_070160 | 0.8685  | 0.3333  | 0.6088  | 0.2908  | 0.5372  | 0.0649  | -0.3555 | -0.565  | -0.8889 | -0.9269 | -0.9389 | -0.4163 |
| PBANKA_123520 | -0.1068 | -0.0415 | 0.0216  | 0.2095  | 0.2905  | 0.5497  | 0.1249  | 0.1827  | -0.2617 | -0.2458 | -0.5532 | -0.6378 |
| PBANKA_100230 | 0.0014  | 0.1053  | 0.0688  | -0.0463 | 0.3081  | -0.6318 | 0.1001  | 0.3072  | 0.0614  | -0.0305 | -0.169  | 0.3874  |
| PBANKA_092400 | -0.2145 | -1.4004 | -0.4965 | -0.3055 | -0.2828 | -0.2226 | -0.3465 | 0.0283  | 0.3515  | 0.3132  | 0.4544  | 0.9298  |
| PBANKA_082880 | -0.7171 | -1.3241 | -0.7167 | 0.2909  | 0.1704  | 0.6681  | 0.5319  | 0.4843  | 0.1428  | 0.3848  | -0.5101 | -0.0415 |
| PBANKA_050190 | 0.733   | 0.0333  | 0.576   | 0.1605  | 0.171   | -0.1907 | 0.1658  | -0.4819 | -0.3021 | -0.4869 | -0.2566 | -1.0903 |
| PBANKA_071510 | -0.0736 | -0.9616 | 0.2433  | 0.5873  | 0.6622  | 0.4133  | 0.5316  | 0.1843  | -0.2496 | -1.0166 | -1.7488 | -1.4241 |
| PBANKA_100770 | 0.1873  | 0.3806  | -0.0986 | 0.137   | 0.2678  | -0.1004 | -0.1303 | -0.2673 | -0.6875 | -0.5007 | -0.5737 | -0.8584 |
| PBANKA_081560 | 0.3977  | 0.1445  | 0.3746  | 0.195   | -0.1322 | 0.134   | 0.0598  | 0.0895  | 0.5843  | 0.3647  | -0.8064 | -0.2052 |
| PBANKA_081430 | 0.3309  | -0.0742 | 0.3672  | 0.265   | 0.1767  | 0.4139  | -0.0366 | -0.3693 | -0.3915 | -0.7211 | -0.7736 | -0.8285 |
| PBANKA_092260 | -0.6244 | -0.1247 | -0.5903 | -0.2754 | -0.3351 | -0.018  | -0.0909 | 0.1907  | 0.4168  | 0.6328  | 0.8528  | -0.0524 |
| PBANKA_052280 | 0.3069  | 0.1763  | 0.2311  | 0.5021  | 0.1957  | 0.2903  | -0.3266 | -0.0181 | 0.3233  | 0.0265  | 0.5522  | -0.0846 |
| PBANKA_136120 | 0.1411  | -0.4008 | -0.0547 | 0.0537  | 0.145   | 0.0966  | 0.1481  | 0.1102  | 0.1701  | 0.443   | -0.3435 | 0.6079  |
| PBANKA_061970 | -0.1134 | -0.5043 | -0.308  | -0.1511 | -0.841  | 0.395   | 0.2585  | 0.6844  | 0.7484  | 1.1915  | 0.5774  | -0.244  |
| PBANKA_145620 | 0.6765  | 0.8679  | 0.3387  | 0.2303  | 0.3469  | -0.3855 | -0.2195 | -0.0565 | -0.2832 | -0.3878 | -0.671  | -0.2423 |
| PBANKA_113190 | 0.3056  | 0.7532  | 0.1573  | -0.1819 | 0.0563  | 0.0559  | -0.1925 | -0.1663 | -0.089  | -0.1432 | -0.1835 | 0.5321  |
| PBANKA_093320 | -0.0785 | -0.2077 | 0.0781  | 0.0415  | 0.0206  | 0.0354  | -0.1715 | -0.5661 | -0.5475 | -1.3207 | -1.2582 | -1.1292 |
| PBANKA_010030 | 0.4992  | 0.6094  | -0.1135 | 0.0317  | -0.1902 | 0.0803  | -0.1357 | 0.0951  | 0.1681  | 0.2628  | 0.4615  | 1.0744  |
| PBANKA_050910 | 0.0547  | 0.7854  | -0.0287 | 0.355   | -0.0522 | 0.3146  | -0.1079 | -0.135  | -0.3565 | -0.2864 | 0.1866  | -0.1378 |
| PBANKA_146220 | 0.3123  | 1.2997  | 0.1651  | 0.1536  | 0.0708  | 0.1933  | -0.1267 | -0.0188 | -0.388  | -0.1706 | -0.0381 | 0.5114  |
| PBANKA_121020 | 1.382   | -0.0632 | 0.4445  | 0.2084  | 0.2445  | -0.2505 | -0.8205 | -0.625  | -0.4159 | -0.3388 | -0.6349 | -0.4955 |
| PBANKA_100810 | 0.6436  | 0.3849  | 0.1358  | 0.3132  | 0.0714  | 0.0674  | -0.5448 | -0.3101 | -0.6277 | -0.648  | -0.1823 | -0.2811 |
| PBANKA_142940 | -0.7633 | -0.156  | -0.8483 | 0.1032  | -0.246  | 0.1421  | 0.2149  | 0.4198  | 0.7058  | 0.9254  | 0.514   | 0.4915  |
| PBANKA_041310 | -0.0364 | 0.3977  | 0.1414  | 0.1233  | 0.1267  | -0.2027 | 0.1121  | 0.2451  | 0.4451  | 0.1938  | -0.2616 | 0.1043  |
| PBANKA_121060 | -2.0103 | -1.3144 | -2.2149 | -1.0175 | -1.1259 | -0.1507 | 0.5714  | 1.098   | 1.6499  | 1.8111  | 0.1143  | 0.1754  |
| PBANKA_130570 | -0.2004 | -0.2491 | 0.423   | 0.5792  | 0.3013  | 0.8557  | 0.2102  | -0.0834 | -0.0985 | -0.1589 | -0.2672 | 0.2944  |
| PBANKA_020350 | 0.1311  | 0.1407  | 0.0927  | 0.2505  | -0.0937 | 0.1963  | -0.1996 | 0.0194  | -0.2745 | -0.1311 | 0.1655  | 0.336   |
| PBANKA_131860 | 0.084   | -0.8773 | -1.3289 | -1.0337 | -0.7272 | -0.2268 | -0.8577 | -0.4986 | 0.0314  | 0.4311  | 1.4945  | 1.9847  |

|               |         |         |         |         |         |         |         |         |         |         |         |         |
|---------------|---------|---------|---------|---------|---------|---------|---------|---------|---------|---------|---------|---------|
| PBANKA_102350 | 0.6696  | 0.088   | 0.477   | 0.397   | 0.4381  | 0.376   | -0.2921 | -0.5805 | -0.47   | -0.8437 | -0.3219 | -0.3242 |
| PBANKA_080610 | 0.2928  | 1.5842  | 0.0767  | -0.0946 | -0.162  | -0.7716 | -0.4631 | -0.3097 | -0.1634 | 0.2892  | 1.2478  | 0.8638  |
| PBANKA_071650 | -0.2506 | -0.7571 | -0.4172 | -0.6128 | -0.857  | 0.2542  | -0.1572 | -0.5377 | -0.4665 | -0.0013 | 0.014   | 0.2607  |
| PBANKA_072030 | 0.2825  | 0.1245  | 0.2516  | 0.2455  | 0.093   | 0.2046  | -0.4678 | -0.6084 | -0.6475 | -0.7505 | -0.3612 | -0.0554 |
| PBANKA_121240 | -0.4343 | 0.1439  | -0.325  | -0.4086 | -0.1219 | -0.003  | -0.1347 | 0.3159  | 0.4037  | 0.4072  | 0.6186  | 0.4112  |
| PBANKA_142970 | 0.6815  | 1.1954  | 0.4592  | 0.0065  | 0.2029  | 0.3227  | -0.2922 | -0.5717 | -0.5355 | -0.4277 | -0.5017 | -0.8567 |
| PBANKA_146090 | -0.3781 | 0.1359  | -0.3215 | 0.0913  | -0.0555 | -0.0211 | 0.2372  | 0.076   | -0.296  | 0.2808  | 0.07    | 0.0175  |
| PBANKA_090560 | 0.4589  | 0.3919  | 0.1675  | 0.2744  | 0.1981  | -0.2031 | -0.7603 | -0.5463 | -0.6049 | -0.6053 | -0.5054 | 0.2401  |
| PBANKA_140770 | 0.581   | 0.7642  | 0.2897  | -0.3613 | -0.1107 | 0.3713  | 0.203   | 0.4314  | -0.091  | 0.1602  | 0.2741  | 0.0314  |
| PBANKA_020370 | -0.4203 | -0.4552 | -0.073  | -0.1124 | 0.0614  | 0.3192  | 0.2183  | 0.1608  | 0.2265  | 0.239   | 0.3994  | 0.0043  |
| PBANKA_061190 | -0.6206 | -0.3065 | -0.4528 | 0.1726  | 0.118   | 0.1468  | 0.7089  | 0.396   | -0.3028 | -0.3748 | -0.0674 | -0.6448 |
| PBANKA_113400 | 0.3308  | 0.1286  | 0.3278  | 0.2245  | 0.0769  | 0.1056  | -0.0367 | 0.0759  | 0.0162  | 0.3066  | 0.5904  | 1.1498  |
| PBANKA_082790 | -0.465  | -0.2713 | 0.0668  | -0.0316 | 0.1954  | 0.4525  | 0.2325  | -0.0913 | -0.245  | -0.361  | -0.5142 | -0.6929 |
| PBANKA_145800 | 0.9749  | 0.7775  | 0.3729  | 0.3483  | 0.2346  | -0.041  | -0.2265 | -0.4752 | -0.8124 | -0.7412 | 0.0469  | -0.589  |
| PBANKA_082530 | 0.1079  | -0.0121 | 0.3825  | 0.4314  | -0.1183 | 0.7948  | -0.2937 | -0.0083 | 0.1647  | -0.0282 | -0.3684 | -0.2713 |
| PBANKA_123010 | 0.142   | 0.0202  | 0.5059  | 0.8734  | 0.542   | 0.8162  | 0.374   | 0.8565  | 0.4964  | 0.3641  | -0.0022 | 0.2821  |
| PBANKA_135350 | 0.0219  | 0.3565  | 0.155   | 0.3935  | 0.1824  | -0.1797 | -0.2652 | -0.5093 | -0.6077 | -0.2295 | -0.8213 | -0.1294 |
| PBANKA_124360 | 0.1909  | 0.5175  | 0.1513  | 0.297   | -0.5617 | -0.7078 | -0.0324 | 0.0167  | -0.081  | -0.123  | -0.0019 | -0.2123 |
| PBANKA_021040 | -0.6189 | -0.7222 | -0.6068 | -0.5443 | -0.0833 | -0.0989 | 0.2294  | 0.2725  | 0.1252  | -0.0826 | 0.1779  | -0.4481 |
| PBANKA_144530 | 0.0906  | 0.2065  | -0.3724 | 0.4069  | 0.3367  | 0.3459  | 0.2699  | -0.0349 | 0.0665  | -0.2223 | -0.368  | 0.3255  |
| PBANKA_120980 | -0.5133 | -0.2877 | 0.1622  | 0.0745  | 0.2884  | 0.1036  | 0.2627  | 0.0847  | -0.9559 | -1.0633 | -1.1836 | -1.643  |
| PBANKA_092780 | 0.1921  | -0.0377 | 0.0116  | 0.3125  | -0.0272 | 0.0958  | -0.2066 | -0.4887 | -0.541  | -0.6223 | -0.1825 | 0.41    |
| PBANKA_082080 | -0.5059 | -0.6061 | -0.3354 | -0.2    | -0.2709 | 0.4596  | 0.3785  | 0.2102  | 0.7848  | 0.7944  | 0.3934  | -0.473  |
| PBANKA_082500 | 1.0011  | 0.3627  | 0.9597  | 0.7873  | 0.4955  | 1.2076  | 0.2119  | -0.3037 | -0.6149 | -0.6008 | -0.6654 | -0.011  |
| PBANKA_070730 | 0.2284  | 0.158   | -0.0169 | -0.1654 | -0.0545 | -0.0026 | -0.1716 | 0.1088  | 0.3309  | 0.452   | 0.7452  | 1.0313  |
| PBANKA_124060 | -2.0634 | -1.2159 | -2.5713 | -1.3484 | -2.1252 | -1.0356 | 0.3401  | 0.9165  | 1.4445  | 1.8186  | 1.0636  | 0.4567  |
| PBANKA_123950 | 0.6584  | -0.0811 | 0.2595  | 0.6953  | 0.2783  | 0.294   | -0.2434 | -0.4554 | -0.8314 | -1.1626 | -1.3024 | -1.1187 |
| PBANKA_071310 | -1.6403 | -0.9727 | -1.4121 | -0.9475 | -0.826  | -0.059  | 0.5117  | 0.5545  | 0.9687  | 1.237   | 0.6495  | 0.4332  |
| PBANKA_071120 | -0.0899 | 0.3787  | 0.1028  | -0.1276 | -0.2561 | -0.0643 | -0.1337 | 0.042   | 0.3214  | 0.1161  | -0.0533 | -0.562  |
| PBANKA_041460 | 0.0989  | 0.3188  | 0.0831  | 0.357   | 0.0769  | 0.0151  | -0.1631 | -0.3618 | -0.468  | -0.9671 | -0.631  | -0.4348 |
| PBANKA_031250 | -0.1187 | 0.0886  | -0.0508 | -0.2811 | -0.1597 | -0.8315 | -0.068  | 0.1393  | 0.2179  | 0.1479  | 0.0948  | 0.2659  |
| PBANKA_050690 | -0.4539 | -0.44   | -0.4193 | -0.8626 | -0.3294 | -0.3307 | 0.0836  | 0.222   | 0.5881  | 0.4418  | -0.5507 | -0.1002 |
| PBANKA_081130 | 0.0537  | 0.6028  | -0.0938 | -0.0148 | -0.1631 | 0.1118  | -0.1936 | -0.3442 | -0.3238 | -0.2491 | 0.1222  | 0.3914  |
| PBANKA_071730 | -0.1447 | 0.5556  | -0.1213 | -0.1477 | -0.1    | 0.0767  | -0.1902 | -0.609  | -0.0906 | 0.0265  | -0.4552 | -0.0317 |
| PBANKA_141970 | -0.0957 | 0.1094  | 0.1141  | 0.3914  | 0.2854  | 0.0751  | -0.0599 | 0.196   | -0.1089 | 0.0433  | -0.1285 | 0.0779  |
| PBANKA_113080 | -0.0066 | -0.0757 | 0.0153  | 0.0613  | 0.1862  | 0.0781  | 0.1759  | -0.0272 | -0.1379 | -0.1604 | 0.1812  | -0.6862 |
| PBANKA_145740 | 0.496   | 0.5065  | 0.3253  | 0.3144  | 0.2312  | 0.0683  | -0.1269 | -0.2926 | -0.3139 | -0.5159 | -0.0879 | 0.1099  |
| PBANKA_041320 | -0.206  | -0.1056 | 0.0324  | 0.0124  | 0.2438  | 0.5333  | 0.4629  | 0.1611  | 0.0819  | -0.4007 | -1.2822 | -0.6817 |
| PBANKA_114230 | 0.0514  | 0.3565  | -0.2085 | -0.0859 | -0.0542 | -0.5104 | -0.6837 | -0.4569 | -0.0516 | -0.0437 | 0.5039  | 0.9472  |
| PBANKA_143150 | 0.2491  | 0.4313  | -0.213  | -0.482  | -0.098  | 0.058   | -0.0433 | 0.2668  | 0.6961  | 0.6563  | 0.6362  | 1.074   |
| PBANKA_051800 | -0.4605 | 0.2959  | -0.2022 | -0.5992 | -0.7698 | -0.1778 | 0.1363  | 0.0277  | 0.0301  | -0.142  | -0.0961 | 0.2762  |
| PBANKA_070310 | -0.2067 | 1.136   | 0.0782  | -0.7006 | -0.0344 | -1.196  | -0.2122 | 0.137   | -0.0644 | -0.153  | -0.4469 | 0.1635  |
| PBANKA_070510 | 0.5539  | 0.1653  | -0.2757 | -0.1739 | -0.3877 | -0.388  | -0.3196 | -0.1605 | -0.0277 | 0.9227  | 0.6284  | 0.9083  |
| PBANKA_021270 | 0.225   | 0.1838  | -0.2952 | -0.612  | -0.1396 | 0.1004  | 0.0775  | 0.3422  | -0.0901 | 0.3569  | 0.5988  | 0.4254  |
| PBANKA_020560 | 0.1904  | -0.0746 | 0.4577  | 0.561   | 0.4171  | 0.1095  | 0.2151  | -0.0977 | -0.2892 | -0.5265 | -0.0967 | 0.1564  |
| PBANKA_082770 | -0.05   | -0.5576 | 0.4041  | 0.581   | 0.465   | -0.0573 | 0.3633  | 0.4094  | 0.049   | -0.0734 | -0.4879 | -0.7933 |
| PBANKA_132830 | 0.1599  | 0.5389  | 0.4839  | 0.0462  | 0.0725  | 0.3353  | 0.083   | -0.4859 | -0.3381 | -0.2822 | -0.4116 | 0.3051  |
| PBANKA_133060 | -0.0014 | 0.0125  | 0.1901  | 0.6149  | 0.3268  | -0.0913 | 0.2769  | -0.1284 | -0.277  | -0.5422 | -0.7661 | -0.5258 |
| PBANKA_122100 | 0.7879  | 0.2829  | 0.6288  | 0.7722  | -0.3302 | 0.489   | 0.3203  | -0.1978 | -0.6566 | -1.1192 | -1.4987 | -0.9674 |
| PBANKA_070360 | 0.198   | 0.5846  | 0.0453  | 0.0951  | 0.3605  | 0.0154  | -0.4028 | 0.0213  | -0.0276 | 0.3145  | 0.0612  | 0.2345  |
| PBANKA_121090 | 0.746   | 0.0077  | 0.0007  | -0.0965 | 0.068   | 0.1812  | 0.0095  | 0.0942  | -0.2134 | -0.0737 | -0.205  | -0.629  |
| PBANKA_111660 | 0.5773  | -0.492  | -0.1088 | 0.9228  | 0.176   | 0.7647  | 0.1121  | 0.155   | 0.403   | 0.3635  | 0.1965  | 0.2713  |
| PBANKA_100720 | -0.0867 | 0.0926  | 0.1582  | 0.1202  | 0.1748  | 0.0107  | -0.594  | -0.5731 | -0.7731 | -0.5457 | -0.6416 | -0.405  |
| PBANKA_010280 | -0.0408 | 0.1379  | 0.1187  | 0.1454  | 0.2134  | 0.5425  | -0.0126 | 0.1348  | -0.1132 | -0.3613 | -0.6185 | -0.4687 |
| PBANKA_020870 | 0.3022  | 0.3719  | 0.1966  | 0.0582  | -0.0691 | 0.1551  | -0.0022 | -0.6641 | -0.7121 | -1.0724 | -0.6309 | -0.0766 |
| PBANKA_122130 | 0.4142  | 0.2888  | 0.0794  | -0.1579 | 0.1748  | 0.325   | 0.1284  | 0.2135  | 0.3679  | 0.3874  | 0.3872  | 0.721   |
| PBANKA_051690 | 0.5245  | 0.0936  | 0.0486  | -0.1046 | -0.6163 | -0.7757 | -0.2231 | -0.2134 | -0.2462 | 0.3346  | 1.1381  | 1.0851  |
| PBANKA_071760 | 0.2971  | 0.032   | 0.39    | 0.3727  | 0.5356  | 0.208   | -0.1601 | -0.3949 | -0.2767 | -0.1231 | -0.2255 | 0.1116  |
| PBANKA_133170 | -0.94   | -0.1442 | -0.696  | -1.031  | -0.7445 | -0.4021 | -0.194  | 0.6455  | 1.0073  | 1.3739  | 1.1201  | 0.4493  |
| PBANKA_145050 | -0.0788 | 0.5925  | 0.1117  | -0.3525 | -0.1993 | -0.1261 | 0.0856  | 0.226   | -0.2349 | 0.093   | -0.1325 | -0.1091 |
| PBANKA_124000 | -0.3147 | 0.0211  | 0.0999  | -0.1243 | 0.4828  | 0.5211  | 0.2485  | 0.4997  | 0.5     | 0.3248  | 0.2283  | -0.3405 |
| PBANKA_122030 | 0.243   | 0.6235  | 0.0086  | 0.2218  | 0.0052  | -0.1436 | -0.1258 | 0.0777  | -0.2668 | -0.0139 | 0.5017  | 0.758   |
| PBANKA_081170 | -0.2195 | -0.2385 | 0.3612  | 0.2269  | 0.4744  | 0.4584  | 0.237   | 0.289   | 0.2274  | 0.2105  | -0.0269 | -0.5478 |



|               |         |         |         |         |         |         |         |         |         |         |         |         |
|---------------|---------|---------|---------|---------|---------|---------|---------|---------|---------|---------|---------|---------|
| PBANKA_091440 | 0.5323  | 0.7177  | 0.5928  | 0.1056  | 0.1653  | -0.2121 | -0.919  | -1.5718 | -1.654  | -1.8266 | -1.4135 | -1.0308 |
| PBANKA_091450 | 0.484   | -0.5616 | -0.091  | -0.1419 | 0.2603  | 0.0989  | 0.1192  | -0.3729 | -0.0644 | -0.0313 | -0.1715 | -0.2628 |
| PBANKA_123240 | -0.2351 | 0.5258  | -0.2403 | -0.2599 | 0.0192  | 0.0672  | -0.1079 | 0.0696  | 0.2536  | 0.1671  | 0.5901  | 0.6022  |
| PBANKA_121670 | 0.1281  | 0.2814  | 0.1292  | 0.0295  | 0.1476  | -0.5437 | 0.1883  | 0.0462  | 0.0704  | 0.0911  | -0.0472 | -0.405  |
| PBANKA_093870 | 0.8224  | -0.3942 | 0.6252  | 0.728   | 0.1331  | 0.1939  | -0.2722 | -0.4929 | -1.3784 | -1.1968 | -1.1902 | -1.4951 |
| PBANKA_145370 | -0.8202 | -0.6304 | -0.5792 | -0.0765 | 0.0202  | -0.0303 | 0.303   | 0.3201  | 0.1381  | 0.2679  | -0.0439 | -0.1028 |
| PBANKA_040910 | 0.5326  | -0.1063 | 0.4403  | 0.3004  | 0.3055  | 0.3227  | 0.0822  | -0.1714 | -0.7714 | -1.1496 | -1.4042 | -1.3871 |
| PBANKA_122060 | -0.2656 | 0.3708  | -0.0416 | -0.0906 | -0.2857 | 0.7258  | 0.1551  | 0.3068  | 0.6614  | 0.47    | 0.2019  | 0.1093  |
| PBANKA_101550 | -0.0339 | 0.1364  | 0.2635  | 0.0145  | 0.199   | 0.7987  | 0.1848  | 0.4953  | 0.3306  | 0.5591  | 0.2157  | -0.0681 |
| PBANKA_130220 | 0.1584  | 0.2834  | 0.1438  | 0.1201  | 0.2788  | 0.2126  | 0.2762  | 0.1193  | -0.1397 | -0.2936 | -0.2383 | -0.3468 |
| PBANKA_050600 | -0.2818 | -0.4751 | -0.3839 | -0.56   | -0.2744 | 0.0433  | 0.2756  | 0.6069  | 0.483   | 0.4433  | 0.6742  | -0.8709 |
| PBANKA_101860 | 0.3666  | 0.6346  | 0.2756  | 0.1679  | 0.3383  | -0.1111 | -0.186  | -0.4934 | -0.5526 | -0.9739 | 0.0082  | 0.4617  |
| PBANKA_145550 | 0.1103  | 0.2083  | 0.0406  | 0.0829  | 0.0295  | 0.3167  | -0.0721 | -0.1818 | -0.1547 | -0.3179 | -0.7871 | -0.5489 |
| PBANKA_103350 | 0.608   | 0.5373  | 0.3936  | 0.6601  | 0.1244  | 0.3298  | 0.1979  | 0.0024  | -0.2081 | -0.0866 | -0.1557 | 0.8027  |
| PBANKA_103500 | 0.2653  | -0.7164 | 0.0819  | 0.2419  | 0.429   | 0.5624  | -0.0148 | 0.2224  | 0.4401  | 0.4688  | -0.2341 | -0.1174 |
| PBANKA_030700 | 0.2853  | 0.1781  | 0.1846  | 0.4127  | 0.0306  | 0.1022  | -0.1669 | -0.2337 | -0.4358 | -1.2542 | -0.8009 | -0.503  |
| PBANKA_133210 | 0.8375  | 0.5473  | 0.7047  | 0.5966  | 0.7667  | 0.6942  | 0.0298  | 0.1436  | 0.0416  | -0.2744 | -0.6291 | -0.8982 |
| PBANKA_132270 | -0.2021 | 0.9361  | 0.4143  | -0.3398 | 0.0107  | -0.2827 | -0.6946 | -0.4032 | -0.2792 | -0.0871 | 0.2642  | 0.9548  |
| PBANKA_090370 | -0.5527 | 0.14    | 0.0982  | 0.1763  | 0.2101  | 0.1986  | -0.3777 | -0.3069 | -0.0992 | -0.3223 | -0.5526 | -0.6808 |
| PBANKA_103900 | -0.4792 | -0.268  | -0.0969 | 0.4338  | -0.166  | -0.2446 | 0.1444  | -0.2316 | -0.4388 | 0.0546  | 0.2644  | 0.0875  |
| PBANKA_062150 | -0.0997 | 0.1378  | -0.0886 | 0.3121  | 0.0158  | 0.0261  | 0.1692  | 0.1308  | -0.0479 | -0.1142 | -0.5086 | -0.4477 |
| PBANKA_052090 | -0.4011 | 0.0717  | -0.2692 | -0.3662 | -0.1793 | 0.3123  | 0.05    | 0.1312  | 0.0154  | -0.1711 | -0.4477 | -0.1668 |
| PBANKA_133160 | -0.3095 | 0.3797  | -0.1881 | -0.0208 | -0.4216 | -0.6549 | -0.2342 | 0.3563  | 0.5893  | 0.7472  | 1.1381  | 1.1479  |
| PBANKA_090870 | -0.5707 | -0.1508 | -0.7902 | -1.3978 | -0.1253 | -0.8308 | -0.0454 | -0.606  | -0.5666 | -0.4916 | -1.0583 | -0.8284 |
| PBANKA_112770 | 0.5384  | 0.8756  | -0.1135 | 0.3163  | 0.1522  | -0.0763 | 0.1283  | -0.0992 | -0.4317 | -0.2164 | -0.6821 | -0.4467 |
| PBANKA_134290 | -0.4611 | 0.0441  | -0.1395 | -0.5286 | -0.2994 | 1.0406  | 0.4733  | 0.7088  | 0.5363  | -0.0489 | -0.0209 | 0.1636  |
| PBANKA_124040 | -0.1259 | -0.3304 | 0.0707  | -0.1271 | -0.0089 | 0.1282  | 0.0049  | -0.2128 | -0.1902 | -0.3419 | 0.3293  | -0.2486 |
| PBANKA_102020 | -0.1221 | 0.149   | 0.3061  | 0.2784  | 0.0258  | 0.4102  | 0.2115  | 0.0078  | -0.1187 | -0.772  | -0.8304 | -0.8099 |
| PBANKA_081760 | 0.6865  | 0.6194  | 0.4788  | 0.6136  | 0.0382  | 0.1631  | 0.0215  | -0.404  | -0.3148 | -0.4375 | -0.5611 | 0.4153  |
| PBANKA_142500 | 0.5003  | 0.1939  | 0.2657  | -0.2288 | 0.3553  | -0.4281 | -0.5166 | -0.4458 | -0.357  | 0.0904  | 0.769   | 0.8255  |
| PBANKA_133600 | 0.1407  | -0.491  | 0.4675  | 0.6011  | 0.4564  | 0.0503  | -0.0822 | 0.0992  | -0.7226 | -1.1911 | -1.0483 | -1.577  |
| PBANKA_142800 | 0.2584  | -0.6156 | -0.0351 | -0.0206 | -0.1266 | -0.0782 | -0.4105 | -0.1246 | -0.9055 | -0.7247 | -0.5372 | -0.9436 |
| PBANKA_133640 | -0.4381 | -0.2746 | -0.4221 | 0.1629  | -0.0685 | 0.3097  | 0.555   | 0.6189  | 0.5261  | 0.4948  | 0.2781  | -0.8659 |
| PBANKA_142720 | -0.262  | -0.2226 | -0.1322 | -0.0312 | -0.3123 | 0.0218  | 0.2157  | 0.2395  | 0.0482  | 0.1921  | -0.0691 | -0.4566 |
| PBANKA_136050 | 0.3901  | 0.7108  | 0.1128  | -0.1092 | -0.2764 | -0.2673 | 0.2728  | 0.3652  | 0.3658  | 0.6118  | 0.0662  | -0.5455 |
| PBANKA_102400 | 0.2296  | -0.1524 | 0.3648  | 0.1302  | 0.1488  | 0.501   | 0.1441  | -0.0726 | -0.0166 | -0.6271 | -0.6858 | -1.2143 |
| PBANKA_142190 | 0.2304  | -0.3485 | 0.2421  | 0.8138  | 0.0992  | 0.5779  | 0.2803  | -0.0399 | -0.4727 | -0.6382 | -0.4676 | -0.4114 |
| PBANKA_081270 | -0.4457 | -0.4047 | -0.4964 | -0.2456 | -0.2248 | 0.8548  | 0.0776  | 0.0922  | 0.0522  | -0.0475 | -0.8964 | -0.9574 |
| PBANKA_070560 | -0.0414 | -0.4377 | -0.2391 | -0.1314 | 0.124   | 0.249   | 0.1615  | 0.1042  | 0.5442  | 0.62    | 0.2613  | 0.0866  |
| PBANKA_061460 | -0.0051 | 1.0129  | 0.3762  | 0.5091  | 0.1974  | 0.4611  | -0.0357 | -0.373  | -0.0197 | -0.3986 | 0.1574  | -0.413  |
| PBANKA_000430 | 0.3531  | 0.4021  | 0.0946  | 0.1506  | 0.2656  | 0.8214  | 0.1144  | -0.2185 | -0.1512 | -0.2853 | -0.1642 | 0.7709  |
| PBANKA_083550 | 0.0042  | -1.0285 | -0.2974 | 0.1981  | -0.5772 | 0.4916  | 0.535   | 1.1583  | 1.0853  | 0.8885  | -1.0106 | -1.2485 |
| PBANKA_110720 | -0.408  | 0.1156  | -0.0458 | 0.0694  | 0.0213  | 0.3069  | -0.2138 | -0.5255 | -0.4724 | -0.3651 | -0.5332 | 0.0556  |
| PBANKA_121980 | 0.0883  | 0.3073  | 0.2008  | 0.1377  | 0.4377  | 0.2707  | -0.1554 | -0.0978 | -0.3794 | -0.3382 | -0.6309 | -0.5907 |
| PBANKA_145860 | 0.2539  | 0.3929  | 0.1244  | 0.5987  | 0.3121  | -0.0779 | -0.2619 | -0.3818 | -0.3211 | -0.3777 | -0.2004 | -0.3842 |
| PBANKA_091570 | 0.0564  | -0.65   | 0.1418  | 0.2657  | 0.4834  | 0.554   | 0.045   | -0.3154 | -0.2917 | -0.3332 | 0.017   | -0.8514 |
| PBANKA_071750 | 0.2335  | 0.4157  | 0.2917  | -0.2093 | 0.149   | 0.1862  | -0.003  | -0.0564 | -0.2961 | -0.3794 | -0.1424 | -0.5103 |
| PBANKA_081620 | -0.4675 | -0.1484 | 0.4004  | 0.2887  | 0.3347  | 0.93    | 0.454   | 0.472   | 0.8682  | 0.0691  | -0.2642 | 0.429   |
| PBANKA_020180 | 0.2494  | -0.105  | 0.1876  | 0.6316  | 0.1537  | -0.0347 | -0.5571 | -1.1418 | -0.8068 | -0.6894 | -1.2562 | -1.1195 |
| PBANKA_071030 | -0.2658 | 0.3305  | 0.2106  | 0.3587  | 0.081   | 0.0825  | 0.1838  | 0.1529  | 0.2018  | 0.3401  | 0.2803  | -0.2788 |
| PBANKA_082620 | -0.3372 | 0.2052  | -0.3433 | 0.2269  | 0.2216  | 0.5298  | 0.3541  | 0.1798  | 0.0403  | 0.223   | -0.1076 | 0.5834  |
| PBANKA_083560 | -0.9707 | -0.3619 | -0.7999 | -0.7611 | -0.4168 | -0.0238 | -0.0795 | 0.2042  | 0.5568  | 0.5548  | -0.1831 | 0.1472  |
| PBANKA_081290 | 0.1317  | -0.5362 | 0.0646  | 0.2165  | 0.437   | 0.1495  | 0.2189  | -0.2547 | -0.1792 | -0.3661 | -0.2769 | -0.8173 |
| PBANKA_110270 | -0.0641 | 0.072   | 0.0191  | 0.3324  | 0.3264  | 0.2341  | 0.1231  | 0.0307  | -0.196  | -0.5073 | -0.5248 | -0.9348 |
| PBANKA_081850 | -0.161  | 0.0704  | 0.0155  | -0.3134 | -0.0741 | 0.0238  | 0.0501  | 0.1907  | -0.2048 | 0.3938  | 0.216   | 0.2449  |
| PBANKA_101600 | -0.3774 | 0.2735  | -0.212  | 0.1461  | -0.1891 | 0.1198  | -0.2516 | 0.1383  | 0.2301  | 0.4395  | 0.5075  | 0.3791  |
| PBANKA_100530 | -0.0703 | 0.2127  | 0.1364  | -0.4555 | 0.3651  | 0.2129  | -0.1658 | -0.2313 | -0.4868 | -0.6246 | -0.4517 | -0.9615 |
| PBANKA_070220 | -0.0262 | 0.6836  | 0.2096  | 0.4353  | 0.0551  | 0.3413  | 0.0523  | -0.3948 | 0.0419  | -0.2082 | -0.3691 | -0.348  |
| PBANKA_133830 | 0.3369  | 0.4247  | 0.2462  | 0.3695  | 0.0498  | 0.2603  | -0.1578 | -0.4673 | -0.8625 | -1.2482 | -1.2692 | -0.2878 |
| PBANKA_143570 | 0.6164  | 0.6415  | 0.1256  | 0.1292  | 0.0081  | 0.0913  | 0.036   | -0.2332 | -0.3062 | -0.1126 | -0.0377 | 0.4097  |
| PBANKA_010200 | -0.0455 | -0.9467 | 0.039   | -0.195  | -0.0817 | -0.1776 | -0.2819 | -0.4976 | -0.4418 | -0.1689 | -0.2593 | -0.4201 |
| PBANKA_141000 | -0.2541 | -0.0638 | -0.0904 | -0.0552 | 0.3354  | 0.2012  | -0.2008 | -0.506  | -0.8725 | -1.0418 | -0.6611 | -1.2305 |
| PBANKA_142880 | -0.3962 | 0.0357  | -0.1549 | 0.1187  | 0.32    | 0.2672  | 0.1293  | 0.1555  | -0.2652 | -0.3559 | 0.0684  | -0.3422 |

|               |         |         |         |         |         |         |         |         |         |         |         |         |
|---------------|---------|---------|---------|---------|---------|---------|---------|---------|---------|---------|---------|---------|
| PBANKA_060240 | 0.1718  | 0.3854  | 0.0291  | 0.6951  | 0.3437  | 0.1549  | -0.1573 | 0.0881  | 0.2016  | 0.1569  | 0.3157  | -0.1569 |
| PBANKA_062260 | 0.1609  | 0.6607  | 0.172   | -0.017  | -0.0172 | 0.2405  | -0.2139 | -0.0098 | 0.2598  | 0.3699  | 0.4482  | 0.9616  |
| PBANKA_120850 | -0.2086 | -0.0237 | 0.2361  | 0.4096  | 0.3444  | 0.3785  | 0.2348  | -0.0669 | -0.1124 | -0.2142 | -0.2726 | -0.5651 |
| PBANKA_061520 | -0.6489 | 0.0839  | -0.5035 | -0.2737 | -0.0998 | -0.0294 | 0.1581  | 0.3975  | 0.5516  | 0.9142  | 0.6397  | 0.7423  |
| PBANKA_021440 | -0.3975 | 0.0813  | -0.0553 | -0.2054 | 0.0565  | -0.345  | -0.3562 | 0.0501  | 0.1395  | 0.2149  | 0.4548  | 0.0727  |
| PBANKA_020500 | -0.61   | -1.6349 | -1.3161 | -1.0521 | -1.2605 | -0.9912 | -0.7795 | -0.029  | 0.9544  | 1.2095  | 1.0457  | 1.3475  |
| PBANKA_011230 | -1.2776 | -1.1401 | -0.7469 | 0.028   | 0.5332  | 0.7095  | 1.0466  | 1.2398  | 1.7145  | 1.2452  | 0.7784  | -0.7073 |
| PBANKA_061900 | 0.3284  | -0.7086 | -0.0013 | 0.1793  | -0.1065 | 0.4665  | 0.2078  | 0.3793  | 0.589   | 0.5409  | 0.5672  | 0.1715  |
| PBANKA_131980 | -0.3049 | -0.0155 | -0.4102 | -0.1406 | -0.1697 | -0.0557 | -0.3991 | -0.2732 | -0.9357 | -0.4439 | 0.0759  | 0.2398  |
| PBANKA_080840 | 0.1238  | 0.0591  | 0.2761  | 0.3824  | 0.2297  | 0.5508  | 0.1258  | 0.1053  | 0.144   | 0.4014  | -0.2693 | -0.4792 |
| PBANKA_131430 | -0.2386 | -0.6161 | 0.22    | 0.364   | 0.3253  | 0.6688  | 0.1542  | -0.2173 | -0.0406 | -0.2352 | 0.1267  | 0.0833  |
| PBANKA_140280 | 0.6093  | -0.2734 | 0.4     | 0.4587  | 0.499   | 0.5463  | 0.276   | -0.3365 | -0.1632 | -0.9632 | -0.8612 | -1.4967 |
| PBANKA_141790 | -0.617  | -0.5104 | -0.6554 | -0.2361 | -0.0922 | -0.1315 | 0.2     | 0.4218  | 0.2962  | 0.4123  | -0.0525 | -0.4969 |
| PBANKA_071890 | 0.3707  | 1.0573  | 0.0601  | -0.5369 | 0.0341  | -0.1361 | 0.0081  | 0.2735  | 0.0818  | -0.3244 | -0.1418 | -0.443  |
| PBANKA_132140 | 0.5279  | 0.2313  | -0.1909 | -0.2683 | -0.4501 | -0.7583 | -0.6213 | -0.1146 | 0.4455  | 0.8204  | 0.6601  | 1.3433  |
| PBANKA_134020 | -0.1655 | 0.289   | 0.3693  | 0.2635  | 0.2676  | 0.3299  | -0.5033 | -0.6468 | -1.1413 | -1.3298 | -0.9808 | -0.7285 |
| PBANKA_143790 | -0.3219 | 0.4204  | -0.3052 | -0.6543 | -0.391  | 0.0049  | -0.095  | 0.2425  | 0.1728  | 0.2525  | 0.1859  | 0.3317  |
| PBANKA_101450 | -0.5078 | -0.9858 | -0.926  | -0.8527 | -0.9013 | -0.1583 | 0.1507  | 0.9106  | 1.0102  | 0.5388  | 0.4913  | -0.3692 |
| PBANKA_101930 | -0.351  | 0.1512  | 0.2124  | -0.0284 | -0.2913 | -0.0621 | -0.2225 | -0.566  | -0.8261 | -0.8226 | -0.7551 | -0.4475 |
| PBANKA_020290 | 0.1661  | 0.7022  | 0.5044  | 0.1933  | 0.1323  | 0.2226  | -0.2413 | -0.1125 | 0.2466  | 0.1442  | 0.5183  | -0.0443 |
| PBANKA_133520 | -0.0432 | -0.0424 | 0.212   | 0.0313  | 0.0605  | -0.0593 | -0.1111 | 0.0783  | -0.3552 | -0.0157 | -0.7412 | 0.1034  |
| PBANKA_092980 | 0.4002  | 0.6573  | 0.2345  | -0.1088 | 0.2266  | 0.6361  | 0.0041  | -0.2395 | -0.128  | -0.513  | -0.5977 | -1.1846 |
| PBANKA_100510 | 0.4119  | 0.4187  | 0.0028  | -0.1785 | -0.2373 | 0.0585  | -0.5163 | -0.4627 | 0.0127  | 0.1998  | 0.8812  | 1.3808  |
| PBANKA_090290 | -0.0029 | 0.1648  | -0.11   | 0.0428  | -0.1872 | 0.1151  | 0.1828  | 0.0186  | 0.3134  | 0.1578  | -0.2763 | 0.1362  |
| PBANKA_081910 | 0.0838  | 0.2596  | 0.2408  | 0.3018  | 0.4154  | 0.108   | -0.0555 | 0.0304  | -0.3233 | -0.4831 | -1.1509 | -0.6485 |
| PBANKA_071790 | 0.127   | 0.566   | 0.3882  | 0.385   | 0.1488  | 0.382   | -0.3225 | -0.3592 | -0.2611 | -0.2296 | 0.0199  | -0.1525 |
| PBANKA_010920 | 0.3579  | -0.1263 | -0.0849 | 0.3597  | -0.0969 | -0.1609 | -0.3401 | -0.3784 | -0.1821 | 0.231   | 1.2711  | 1.0225  |
| PBANKA_081780 | 0.0711  | 0.7147  | 0.3247  | 0.271   | 0.2624  | 0.2185  | -0.2782 | 0.0305  | -0.4663 | -0.7376 | -0.8256 | -0.2557 |
| PBANKA_143580 | 0.028   | -0.4984 | 0.0218  | 0.2383  | 0.2187  | 0.3081  | 0.265   | 0.0862  | -0.2297 | -0.151  | -0.6731 | -0.4021 |
| PBANKA_080680 | -0.1525 | -0.6055 | -0.2111 | -0.2441 | -0.1929 | -0.5125 | -0.2983 | 0.3104  | 1.0307  | 1.1213  | 1.1852  | 1.1238  |
| PBANKA_136550 | 0.7595  | 0.9138  | 0.52    | 0.262   | 0.0846  | -0.1126 | -0.892  | -1.2141 | -1.3018 | -1.6475 | -0.5864 | -0.3045 |
| PBANKA_093270 | 0.0312  | 0.1184  | 0.4567  | 0.4693  | 0.2933  | 0.4495  | 0.3944  | -0.189  | -0.7094 | -1.1561 | -1.0572 | -0.7292 |
| PBANKA_120630 | -0.3673 | 0.1289  | -0.319  | -0.3529 | -0.183  | 0.0073  | -0.314  | -0.0822 | -0.1101 | 0.266   | 0.817   | 0.8675  |
| PBANKA_145220 | 0.6527  | 0.3391  | 0.0978  | 0.2379  | -0.0287 | 0.146   | -0.1307 | -0.3865 | -0.1942 | -0.2446 | 0.7232  | 1.2059  |
| PBANKA_080620 | -0.0848 | -0.4419 | -0.1576 | 0.2821  | 0.3255  | 0.2867  | 0.0957  | -0.255  | -0.7328 | -1.1065 | -1.0802 | -1.5297 |
| PBANKA_103020 | 0.5185  | 0.1678  | 0.0622  | -0.3455 | -0.0361 | 0.0713  | 0.007   | 0.0696  | -0.0378 | 0.0262  | -0.2783 | 0.1044  |
| PBANKA_120640 | -0.5041 | -0.2333 | -0.2781 | -0.1272 | 0.1047  | 0.4171  | 0.3188  | 0.0254  | -0.2757 | -0.1729 | -0.4429 | -0.9231 |
| PBANKA_061570 | 0.2185  | 0.2163  | -0.1275 | 0.1637  | 0.0699  | 0.0827  | -0.0943 | -0.0029 | 0.3406  | 0.3219  | 0.2941  | 0.0653  |
| PBANKA_123810 | -1.1006 | -0.6403 | -0.6188 | -0.8653 | -0.2323 | -0.1255 | -0.0151 | -0.0256 | -0.2718 | -0.4021 | -0.5287 | -0.2859 |
| PBANKA_051460 | 0.4459  | -0.4158 | 0.3012  | 0.5794  | 0.1394  | 0.6204  | -0.0252 | -0.5588 | -0.3171 | -0.4193 | -0.1335 | -0.6525 |
| PBANKA_111400 | -0.1954 | -0.0571 | 0.3227  | 0.0175  | 0.0557  | -0.2759 | 0.2715  | 0.1731  | 0.0967  | -0.0167 | -0.0844 | -0.4321 |
| PBANKA_052140 | 0.4478  | 0.2983  | -0.0748 | -0.2283 | -0.1724 | -0.0804 | -0.1362 | -0.2243 | 0.3915  | 0.7199  | 1.1743  | 1.4358  |
| PBANKA_020610 | -0.1351 | 0.0746  | 0.2025  | 0.1352  | 0.3197  | -0.6714 | -0.0446 | -0.304  | -0.4043 | -0.4627 | -0.5042 | -0.7058 |
| PBANKA_142980 | -0.0064 | -0.3314 | 0.1525  | 0.1348  | 0.2666  | 0.5231  | -0.1483 | -0.1562 | -0.2466 | -0.7511 | -0.7022 | -0.4054 |
| PBANKA_040800 | 0.0279  | 0.0503  | 0.3399  | 0.4098  | 0.4563  | 0.8399  | -0.0866 | 0.0688  | -0.3382 | -0.456  | -0.687  | -0.5959 |
| PBANKA_050490 | 0.3399  | 0.7251  | 0.1228  | 0.0092  | -0.2048 | 0.423   | -0.0259 | -0.5876 | 0.0801  | 0.1607  | 1.2578  | 0.7451  |
| PBANKA_093050 | 0.1502  | 0.1382  | 0.1342  | -0.715  | -0.0577 | -0.147  | 0.0278  | -0.1956 | -0.4378 | -0.355  | -0.7494 | -0.3333 |
| PBANKA_111670 | -0.0183 | 0.3105  | 0.1361  | -0.3049 | -0.2909 | 0.4905  | 0.1776  | -0.032  | 0.1121  | -0.0699 | 0.3267  | 0.017   |
| PBANKA_101080 | 0.1114  | 0.5722  | 0.1557  | 0.1574  | 0.2428  | 0.2199  | -0.2074 | -1.4249 | -1.5696 | -2.2053 | -1.1744 | -0.7457 |
| PBANKA_140860 | 0.2368  | 0.634   | 0.1789  | 0.1782  | 0.3218  | 0.15    | -0.2077 | -0.4493 | -0.2525 | -0.1802 | -1.2852 | -0.1117 |
| PBANKA_080740 | -0.1899 | -0.2739 | 0.3629  | 0.7968  | 0.3586  | 0.2349  | 0.0195  | -0.2156 | -0.6388 | -0.8699 | -0.9538 | -1.1114 |
| PBANKA_111840 | -0.2528 | -0.3445 | 0.3424  | 0.2763  | 0.1026  | 0.7145  | 0.2084  | -0.1053 | -0.1603 | -0.3863 | -0.579  | -0.4341 |
| PBANKA_041050 | 0.3395  | 0.3905  | 0.2337  | 0.2433  | 0.0293  | 0.2454  | -0.3091 | -0.0563 | 0.2547  | 0.2015  | 0.1403  | -0.2651 |
| PBANKA_093140 | 0.3832  | 0.945   | 0.436   | -0.5077 | 0.2514  | 0.2901  | 0.0283  | 0.2011  | -0.5011 | -0.7876 | -0.2652 | 0.0882  |
| PBANKA_040450 | 0.3723  | 0.4455  | 0.4246  | 0.3858  | 0.1595  | 0.6065  | -0.0436 | -0.2853 | 0.0126  | -0.0949 | -0.156  | 0.4072  |
| PBANKA_050780 | -0.3494 | 0.0915  | -0.3404 | -0.2402 | -0.1071 | -0.1027 | 0.1924  | 0.2687  | 0.4469  | 0.6544  | 0.2397  | 0.276   |
| PBANKA_145030 | -0.6481 | -0.3425 | -0.2601 | 0.0127  | 0.3843  | 0.2307  | 0.3045  | -0.058  | -0.564  | -0.7784 | -0.9669 | -1.1205 |
| PBANKA_041040 | -1.5444 | -0.7711 | -1.5153 | -0.6719 | -0.5632 | -0.0681 | 0.5442  | 0.6216  | 0.829   | 0.8469  | 0.1511  | -0.0512 |
| PBANKA_143510 | 0.1065  | -0.6104 | -0.008  | 0.6154  | 0.1874  | 0.2686  | -0.0646 | -0.4032 | -0.8378 | -0.9224 | -0.7318 | -0.6726 |
| PBANKA_030750 | -0.5271 | -0.2661 | -1.1042 | -1.211  | -0.2285 | -0.036  | 0.4731  | 0.8969  | 1.3655  | 0.8377  | 0.3761  | 0.4533  |
| PBANKA_130600 | -1.105  | -0.665  | -0.3294 | 0.1461  | 0.1264  | 0.4523  | 0.1019  | -0.3281 | -0.0712 | -0.7266 | -0.7461 | -0.6427 |
| PBANKA_121470 | -0.2007 | -0.1942 | 0.0202  | -0.2362 | 0.0665  | 0.8789  | 0.0744  | -0.3453 | -0.0096 | -0.0822 | -0.3807 | -0.3804 |
| PBANKA_124160 | 0.3491  | 0.1538  | 0.1456  | 0.6797  | 0.0253  | 0.4472  | 0.2335  | 0.14    | 0.0361  | 0.0803  | -0.5191 | -0.7759 |

|               |         |         |         |         |         |         |         |         |         |         |         |         |
|---------------|---------|---------|---------|---------|---------|---------|---------|---------|---------|---------|---------|---------|
| PBANKA_061230 | 0.0217  | 0.7183  | 0.323   | 0.0013  | -0.6023 | 0.5555  | -0.102  | 0.1585  | 0.0113  | -0.0071 | -0.2984 | 0.2785  |
| PBANKA_094160 | 0.3719  | 0.3787  | 0.0018  | -0.1302 | 0.1912  | 0.6095  | 0.0164  | 0.2837  | 0.3797  | 0.389   | 0.2583  | 0.2039  |
| PBANKA_083000 | 0.3411  | -0.1455 | 0.2485  | 0.3493  | 0.3827  | 0.3751  | -0.3939 | -0.1221 | -0.5597 | -0.982  | -0.819  | -0.3218 |
| PBANKA_090110 | -0.5964 | -0.1175 | -0.0674 | -0.1264 | 0.1518  | 0.2772  | 0.1314  | 0.1876  | 0.1614  | 0.0687  | -0.4232 | -0.439  |
| PBANKA_071390 | -2.1851 | -0.9168 | -0.9187 | -0.0309 | 0.0193  | 0.5185  | 0.6948  | 0.5163  | 0.6769  | 0.5733  | -0.3229 | -0.5976 |
| PBANKA_102440 | -0.2203 | -0.2052 | 0.1229  | 0.0032  | 0.1622  | 0.7031  | 0.3752  | -0.1728 | 0.0244  | -0.0539 | -0.6648 | 0.3348  |
| PBANKA_010760 | -0.1497 | 0.264   | 0.1161  | -0.2361 | -0.0647 | 0.0115  | 0.0262  | 0.2596  | -0.3109 | 0.2261  | 0.9778  | 0.1027  |
| PBANKA_124170 | -0.1421 | -0.3885 | 0.1688  | 0.3113  | 0.2398  | 0.4208  | 0.3452  | 0.0705  | 0.0538  | -0.5332 | -0.9509 | -0.7945 |
| PBANKA_103930 | 0.0323  | -0.1225 | 0.2604  | -0.0829 | -0.0418 | 0.1433  | 0.1153  | -0.0604 | -0.1269 | -0.1354 | -0.2664 | -0.8045 |
| PBANKA_135250 | -0.1042 | -0.8609 | 0.2385  | -0.1176 | 0.1719  | 0.4765  | -0.3711 | 0.2964  | 0.1564  | 0.4328  | 1.1223  | 1.3356  |
| PBANKA_080720 | -0.4593 | -0.2165 | -0.64   | -0.3024 | -0.2385 | 0.0935  | 0.175   | 0.3427  | 0.4517  | 0.5206  | 0.3286  | 1.2532  |
| PBANKA_135170 | -0.2289 | -0.0456 | -0.0779 | 0.0136  | 0.1938  | 0.4288  | 0.0815  | 0.7289  | 0.2705  | 0.448   | 0.0119  | 0.188   |
| PBANKA_010620 | 0.1833  | 0.1999  | -0.0087 | 0.1249  | 0.2139  | 0.3469  | 0.1143  | 0.11    | -0.0621 | -0.1578 | 0.1613  | 0.2978  |
| PBANKA_124450 | -0.2155 | 1.0214  | -0.8203 | -0.6631 | -0.195  | -0.457  | -0.0966 | -0.0343 | -0.0288 | 0.0307  | -0.316  | -0.8496 |
| PBANKA_020600 | -0.5506 | -0.8324 | -0.3224 | 0.2498  | 0.3607  | 0.6645  | 0.5685  | 0.374   | 0.4339  | -0.0565 | -0.8186 | -0.7897 |
| PBANKA_071570 | -0.1516 | 0.7261  | 0.0862  | 0.0062  | 0.2277  | 0.483   | -0.0907 | -0.0821 | -0.0314 | 0.1104  | 0.711   | 0.3496  |
| PBANKA_130460 | 0.1571  | 0.1533  | 0.332   | -0.2526 | 0.3363  | -0.3685 | 0.2379  | -0.0331 | -0.244  | -0.1783 | -0.2918 | -0.6011 |
| PBANKA_050290 | 0.0764  | -0.0273 | -0.0145 | 0.0922  | -0.0619 | -0.4126 | -0.2367 | 0.1349  | -0.1584 | 0.0715  | -0.1039 | 0.5026  |
| PBANKA_111580 | -0.1317 | -0.6966 | -0.1047 | 0.3116  | -0.7696 | 0.7046  | 0.6999  | 0.4393  | 0.6599  | 0.1972  | -0.5804 | -1.545  |
| PBANKA_103010 | -0.0795 | 0.3349  | -0.0793 | -0.1747 | 0.083   | 0.062   | -0.2688 | -0.2039 | -0.2431 | 0.2381  | 0.197   | 0.392   |
| PBANKA_142140 | -0.3417 | -0.6481 | -0.8654 | 0.2206  | -0.7339 | -0.3174 | -0.6008 | -0.6086 | 0.2391  | 0.5333  | 0.5359  | 1.0558  |
| PBANKA_102380 | -0.0105 | 0.4665  | 0.1169  | -0.1857 | 0.0096  | 0.2372  | 0.0449  | 0.2115  | 0.0427  | 0.2003  | -0.0009 | 0.7036  |
| PBANKA_040470 | -0.4191 | 0.0292  | 0.0099  | 0.7196  | 0.6494  | 0.5488  | 0.1935  | 0.0655  | -0.2065 | -0.6997 | -0.9497 | -1.2782 |
| PBANKA_081680 | -0.6153 | -0.6252 | -0.3152 | 0.2381  | 0.0133  | 0.5392  | 0.0403  | 0.2502  | 0.2405  | -0.5234 | 0.6327  | 0.5931  |
| PBANKA_136560 | -0.0328 | 0.0606  | -0.26   | 0.5282  | 0.0638  | -0.0614 | -0.2823 | -0.2386 | -0.154  | 0.0564  | 0.9865  | 1.1319  |
| PBANKA_130290 | -0.9055 | -0.4111 | -0.402  | -0.1109 | 0.1365  | 0.4677  | 0.6778  | 0.2491  | -0.132  | -0.2248 | -0.3456 | -0.3675 |
| PBANKA_140700 | 0.0335  | 0.004   | -0.6649 | -0.1341 | 0.0779  | 0.1812  | 0.0912  | 0.1352  | 0.2492  | 0.0876  | 0.354   | -0.133  |
| PBANKA_121530 | -0.1069 | -1.2369 | -0.1409 | 0.413   | -0.0629 | 1.0393  | 0.1195  | 0.2368  | -0.0685 | -0.3141 | -0.1158 | -0.3532 |
| PBANKA_123730 | 0.1293  | -0.8042 | -0.0586 | -0.4154 | -0.3957 | -0.4505 | -0.1901 | 0.1335  | 0.2817  | 0.3069  | -0.1265 | 0.5156  |
| PBANKA_144420 | 0.1941  | 1.0457  | -0.1762 | 0.096   | -0.3032 | 0.0138  | -0.2477 | -0.1894 | -0.1051 | 0.0065  | -0.3787 | -0.1063 |
| PBANKA_010890 | -0.0204 | 0.1216  | -0.0767 | 0.3564  | 0.0445  | 0.2754  | -0.2801 | -0.9254 | -1.3792 | -1.281  | -0.9157 | -1.2331 |
| PBANKA_101920 | -0.5877 | -0.7328 | -0.537  | -0.1071 | 0.4204  | 0.6253  | 0.3964  | 0.3678  | 0.3575  | 0.0945  | -0.5758 | -0.917  |
| PBANKA_092280 | 0.2215  | -0.0947 | 0.3797  | 0.4198  | 0.406   | 0.1967  | -0.1508 | -0.591  | -0.8887 | -1.5372 | -1.6371 | -1.2999 |
| PBANKA_112640 | -0.1902 | -0.4995 | 0.1504  | -0.3115 | 0.083   | -0.143  | -0.2599 | -0.4213 | -0.1201 | -0.4374 | 0.1918  | 0.4909  |
| PBANKA_136480 | 0.1013  | 0.4364  | -0.0895 | 0.2723  | 0.1033  | -0.5368 | 0.2241  | 0.002   | 0.3275  | 0.3419  | 0.2989  | 0.2501  |
| PBANKA_145750 | 0.4532  | 0.8044  | 0.2507  | 0.0243  | 0.1565  | -0.034  | -0.2743 | -0.3712 | -0.3729 | -0.5881 | -0.0889 | -0.2015 |
| PBANKA_144650 | 0.3399  | 0.8309  | -0.0436 | 0.0248  | 0.0769  | 0.4935  | 0.0205  | -0.6427 | -0.7814 | -0.6639 | -0.993  | -0.3622 |
| PBANKA_145300 | -0.0736 | -0.088  | -0.2077 | -0.1071 | -0.0436 | -0.09   | 0.4106  | 0.6991  | 0.6873  | 0.801   | 0.4289  | 0.2928  |
| PBANKA_082190 | 0.3885  | 0.5841  | 0.4089  | 0.3552  | 0.2906  | -0.0922 | -0.4621 | -0.7301 | -0.9572 | -1.3078 | -0.7108 | -0.9203 |
| PBANKA_142560 | -0.2326 | -0.2536 | -0.4623 | -0.1162 | -0.4768 | -0.2383 | -0.4093 | -0.5238 | -0.3112 | -0.5305 | -1.0284 | -1.2519 |
| PBANKA_050930 | -0.2717 | -0.8672 | -0.305  | 0.2004  | -0.0293 | 0.0559  | -0.2913 | -0.3694 | -0.2083 | -0.322  | -0.2116 | -0.6929 |
| PBANKA_080830 | 0.6158  | 0.8602  | 0.1219  | -0.7311 | 0.2193  | 0.6987  | 0.0363  | 0.1698  | -0.0218 | 0.1368  | 0.6886  | 0.051   |
| PBANKA_020590 | 0.0697  | -0.4941 | -0.2629 | 0.0145  | -0.1737 | -0.0656 | 0.0106  | 0.1239  | 0.1578  | 0.3458  | 0.331   | 0.0118  |
| PBANKA_100480 | 0.0069  | -0.4628 | -0.0429 | 0.2268  | 0.2006  | 0.0499  | 0.2509  | 0.0841  | -0.0899 | -0.4167 | -0.612  | -0.6758 |
| PBANKA_070850 | 0.0927  | -0.1376 | 0.1042  | 0.3314  | -0.2201 | -0.3214 | 0.3081  | -0.2072 | 0.1033  | -0.1453 | -0.1254 | 0.2706  |
| PBANKA_060230 | 0.2526  | -0.6007 | 0.1597  | 0.4109  | 0.3981  | 0.5999  | 0.2676  | 0.572   | 0.5027  | 0.0388  | -1.4188 | -1.4133 |
| PBANKA_071590 | -0.2797 | 0.2008  | 0.0499  | -0.136  | 0.0973  | -0.0217 | -0.2203 | 0.0243  | -0.235  | -0.4731 | -0.9074 | -1.1838 |
| PBANKA_050980 | -0.2767 | 0.1342  | 0.3907  | 0.617   | 0.2654  | 0.3924  | 0.3872  | -0.0763 | -0.7153 | -0.8393 | -1.1734 | -1.0593 |
| PBANKA_123480 | 0.4156  | 0.7498  | 0.4609  | 0.072   | -0.0159 | -0.1992 | -0.8588 | -0.989  | -0.8641 | -0.7706 | 0.166   | 0.5037  |
| PBANKA_041470 | 0.0414  | -0.188  | -0.7068 | -0.5484 | -0.8027 | -0.7551 | -0.8088 | -0.1991 | 0.7669  | 1.2903  | 1.0023  | 1.9153  |
| PBANKA_060530 | 1.0003  | 0.5957  | 0.2598  | 0.3688  | 0.1844  | -0.7517 | -0.1201 | -0.8122 | -0.8169 | -0.448  | -0.0532 | -0.4492 |
| PBANKA_030970 | 0.1756  | 0.4381  | 0.1714  | 0.4098  | 0.2803  | 0.2916  | -0.0468 | 0.0646  | -0.2164 | -0.1687 | -0.4696 | -0.0173 |
| PBANKA_082110 | -0.0653 | 0.5383  | -0.0545 | 0.3241  | 0.0477  | 0.3995  | 0.3487  | 0.223   | 0.0211  | 0.1699  | 0.0475  | -0.3616 |
| PBANKA_113180 | 0.2708  | 0.1259  | 0.3437  | 1.107   | 0.209   | 0.61    | 0.1226  | 0.1104  | -0.2054 | -0.1175 | 0.1483  | 0.0102  |
| PBANKA_134440 | 0.0805  | -0.2755 | -0.1865 | -0.1436 | -0.3054 | 0.0474  | 0.4755  | 0.4137  | 0.8399  | 0.9455  | 0.3404  | 0.2751  |
| PBANKA_113970 | -0.2775 | 0.506   | 0.0977  | -0.399  | 0.0352  | 0.072   | -0.0951 | -0.1973 | -0.033  | -0.2478 | -0.3516 | -0.7706 |
| PBANKA_145470 | 0.0875  | 0.6402  | 0.0833  | -0.2633 | -0.1911 | 0.3053  | -0.2373 | 0.1486  | 0.1909  | -0.3351 | -0.455  | -0.0433 |
| PBANKA_061850 | 0.2687  | 0.7477  | 0.2629  | 0.1658  | 0.0044  | 0.4526  | -0.0556 | -0.05   | -0.131  | -0.088  | 0.1251  | -0.0392 |
| PBANKA_110980 | 0.2535  | 0.761   | 0.2414  | 0.1483  | 0.5704  | 0.4287  | -0.0204 | 0.1168  | -0.1489 | -0.1409 | -0.034  | 0.5749  |
| PBANKA_123490 | 0.3969  | 0.3087  | 0.1619  | 0.4042  | -0.0133 | 0.435   | -0.0051 | 0.2113  | -0.2339 | -0.028  | 0.3677  | 0.379   |
| PBANKA_141230 | 0.175   | 0.3145  | 0.1114  | 0.4586  | 0.0778  | 0.3765  | 0.1642  | 0.1194  | -0.1511 | -0.283  | -0.6227 | -0.6575 |
| PBANKA_090490 | -0.4715 | 0.1341  | 0.1662  | 0.1775  | 0.1579  | 0.2857  | -0.0949 | -0.3379 | -0.8626 | -1.0935 | -0.8909 | -0.5398 |
| PBANKA_120880 | -0.0542 | -0.0148 | -0.2452 | -0.3327 | -0.0902 | -0.1179 | -0.1972 | 0.2389  | 0.7337  | 1.0557  | 1.4029  | 0.6522  |

|               |         |         |         |         |         |         |         |         |         |         |         |         |
|---------------|---------|---------|---------|---------|---------|---------|---------|---------|---------|---------|---------|---------|
| PBANKA_070190 | -0.7317 | -1.1345 | -0.3118 | -0.0596 | 0.134   | -0.6252 | 0.0129  | 0.2545  | 0.7263  | 0.913   | 1.3009  | 0.4033  |
| PBANKA_101200 | -0.4796 | -0.5355 | -0.1864 | -0.1942 | -0.195  | -0.4959 | 0.635   | 0.6183  | 1.003   | 1.0083  | -0.2048 | 0.3534  |
| PBANKA_081350 | 0.1404  | -0.1473 | 0.1722  | 0.9947  | 0.2727  | 0.5729  | 0.2332  | 0.0355  | -0.0435 | -0.1956 | -0.9667 | -0.2959 |
| PBANKA_145760 | 0.3843  | -0.0212 | 0.3867  | 0.3765  | 0.3391  | 0.1549  | 0.186   | -0.093  | -0.194  | -0.5139 | -0.9719 | -0.8972 |
| PBANKA_144270 | 0.2155  | 0.2388  | 0.5386  | 0.3122  | -0.0296 | 0.2833  | 0.0756  | -0.1931 | -0.3995 | -0.7201 | -0.452  | -0.3408 |
| PBANKA_091840 | 0.3666  | -1.3039 | 0.3184  | 1.2607  | 0.0262  | 0.3428  | 0.0387  | -0.1267 | -0.4002 | -0.5434 | 0.2103  | -0.421  |
| PBANKA_060540 | 0.4627  | 0.0341  | 0.8175  | 0.0596  | 0.4989  | 0.3692  | -0.0909 | -0.2692 | -0.7605 | -0.8737 | -0.6653 | -0.6859 |
| PBANKA_145250 | 0.1751  | -0.1873 | 0.2967  | 0.2149  | 0.3838  | 0.3221  | -0.0069 | 0.0213  | -0.1893 | -0.1482 | 0.4135  | 0.2121  |
| PBANKA_132910 | -0.4976 | -0.4364 | -0.1062 | -0.0127 | -0.1567 | 0.4647  | 0.1622  | 0.0165  | 0.4735  | 0.3652  | 0.8424  | 1.3066  |
| PBANKA_090520 | -0.2441 | 0.135   | 0.0732  | -0.7602 | 0.0069  | -0.2627 | -0.0885 | 0.1474  | 0.5074  | 0.759   | 0.579   | 0.6823  |
| PBANKA_070110 | -0.1703 | 0.0495  | 0.0754  | 0.0279  | 0.1912  | 0.0642  | 0.0599  | -0.0569 | -0.3477 | -0.9778 | -0.945  | -0.5852 |
| PBANKA_101810 | -0.0688 | -1.0763 | -0.9187 | -1.0401 | -0.7903 | -1.008  | -1.0627 | -0.5146 | -0.7419 | -0.2766 | 0.8427  | 0.5978  |
| PBANKA_112850 | 0.2457  | 0.1007  | 0.1034  | -0.0008 | 0.2215  | -0.2418 | 0.1514  | 0.1332  | 0.0707  | -0.0213 | -0.3301 | -0.2222 |
| PBANKA_135050 | -0.31   | -0.1508 | -0.3022 | -0.2794 | 0.075   | 0.2872  | 0.0928  | 0.1901  | 0.0522  | 0.2186  | 0.3461  | 0.4649  |
| PBANKA_051480 | -0.6943 | 0.3317  | -0.6341 | -0.2884 | -0.1607 | 0.1659  | 0.5054  | 0.7264  | 0.7021  | 0.8255  | 0.7486  | -0.0809 |
| PBANKA_144970 | -0.9447 | -0.6794 | -0.744  | -0.2995 | -0.236  | -0.1381 | 0.3894  | 0.6392  | 1.2946  | 0.9785  | 0.5368  | 0.8194  |
| PBANKA_010690 | 0.0746  | 0.2658  | 0.0073  | 0.2153  | 0.0435  | 0.3839  | 0.0353  | 0.0436  | -0.1166 | -0.3916 | -0.8469 | -0.5126 |
| PBANKA_070170 | 0.3372  | 0.7659  | 0.2127  | -0.097  | 0.0545  | -0.3096 | -0.0228 | -0.2707 | -0.453  | -0.2579 | -0.2414 | -0.182  |
| PBANKA_123510 | 0.0169  | -0.1851 | 0.3588  | 0.2382  | 0.4902  | 0.3234  | 0.0971  | -0.4496 | -0.7345 | -1.4937 | -1.5031 | -0.9481 |
| PBANKA_135950 | -0.4836 | -0.8447 | -0.1078 | 0.2218  | 0.3474  | 0.1663  | 0.4167  | 0.2155  | -0.0169 | -0.4163 | -0.6457 | -0.4861 |
| PBANKA_100590 | 0.3959  | 0.2175  | -0.0278 | 0.3527  | -0.0605 | -0.0164 | -0.0011 | 0.2864  | -0.2736 | 0.075   | -0.4761 | -0.8919 |
| PBANKA_101320 | -0.1965 | 0.2745  | 0.1556  | 0.2244  | -0.0375 | -0.0153 | 0.282   | 0.1878  | -0.005  | 0.0985  | -0.2434 | 0.3183  |
| PBANKA_130690 | -0.4821 | -0.7958 | -0.2133 | -0.736  | -0.123  | -0.4588 | 0.283   | 0.3291  | 0.309   | 0.4604  | 0.2084  | -0.4017 |
| PBANKA_110960 | -0.4116 | -0.386  | -0.4061 | -0.3953 | -0.3774 | -1.2472 | -0.58   | 0.0983  | 0.6579  | 0.7553  | 1.4948  | 0.9212  |
| PBANKA_124130 | 0.1117  | -0.8586 | -0.0681 | 0.0639  | -0.0962 | -0.1938 | 0.2262  | 0.0762  | 0.4985  | -0.0123 | -0.5528 | -1.0332 |
| PBANKA_131960 | -0.2149 | -0.3116 | -0.2758 | 0.0815  | 0.1268  | 0.504   | 0.1865  | -0.1857 | 0.1129  | -0.253  | -0.1339 | -0.5456 |
| PBANKA_093230 | -0.4952 | -0.4372 | -0.3752 | -0.5695 | -0.7125 | -0.0367 | -0.6324 | -0.669  | -0.3797 | -0.5667 | -0.988  | -0.5805 |
| PBANKA_041020 | -0.1045 | -0.3038 | 0.2744  | 0.1783  | -0.0206 | -0.3104 | 0.5299  | 0.8636  | 0.1325  | -0.0169 | -0.3275 | -0.2226 |
| PBANKA_083050 | -0.3081 | 0.3907  | -0.2844 | -0.2928 | -0.1222 | 0.1111  | -0.2732 | -0.4236 | -0.4521 | -0.2861 | -0.5279 | -0.3472 |
| PBANKA_041640 | -0.4931 | -0.0097 | 0.0029  | 0.205   | -0.0748 | 0.9071  | 0.4843  | -0.4697 | -0.3166 | -0.3559 | -0.5571 | -0.6866 |
| PBANKA_100840 | 0.2333  | 0.6475  | -0.0445 | -0.4837 | 0.1846  | -0.0015 | 0.1425  | -0.2974 | -0.1251 | -0.4883 | -0.1826 | -0.3116 |
| PBANKA_140810 | 0.1091  | 0.3158  | 0.1253  | 0.2331  | 0.1051  | -0.1484 | -0.1915 | -0.4751 | -0.4667 | -0.7784 | -0.6172 | -0.4687 |
| PBANKA_030850 | 0.4174  | 0.1613  | 0.1452  | -0.4202 | -0.004  | -0.1656 | -0.3818 | -0.264  | -0.4768 | -0.1653 | 0.3249  | 0.5432  |
| PBANKA_121250 | -0.3685 | -0.5563 | -0.2459 | -0.9756 | -0.1437 | 0.2234  | -0.1296 | 0.2755  | 0.5962  | 0.7315  | 0.8877  | 0.4738  |
| PBANKA_123250 | 0.6495  | 0.8407  | 0.2123  | 0.0789  | 0.3268  | 0.0208  | -0.4732 | -0.7169 | -0.9447 | -1.0412 | -0.3857 | -0.3456 |
| PBANKA_071220 | -0.1532 | 0.0712  | -0.1181 | 0.3665  | 0.0335  | 0.457   | 0.0774  | 0.1393  | 0.424   | 0.4387  | 0.6358  | 0.2672  |
| PBANKA_114440 | 0.2035  | -0.3183 | 0.2389  | 0.7257  | 0.4338  | -0.1997 | 0.0935  | -0.1139 | 0.2153  | -0.0783 | -0.44   | -0.5495 |
| PBANKA_041140 | -0.5988 | 0.1167  | -0.1912 | -0.0108 | 0.1793  | 0.0573  | -0.0451 | -0.2212 | -0.463  | -0.4655 | -0.7815 | -0.9433 |
| PBANKA_145060 | 0.2111  | -0.3695 | 0.4809  | 0.2924  | 0.0628  | 0.6136  | 0.1794  | -0.4194 | 0.2417  | 0.0679  | -0.8634 | -0.5215 |
| PBANKA_112500 | 0.5727  | -0.2125 | 0.1397  | -0.2167 | 0.0685  | -0.5556 | -0.2427 | -0.2196 | -0.6623 | -0.8639 | -0.5745 | -0.0944 |
| PBANKA_041630 | -0.6235 | -0.3214 | -0.7884 | -0.383  | 0.0307  | -0.1531 | -0.2019 | -0.3698 | -0.2811 | -0.2362 | -0.3487 | -0.3179 |
| PBANKA_070710 | -0.8541 | -1.0306 | -1.009  | -0.404  | -0.6631 | -0.5    | -0.8505 | 0.0131  | 0.9267  | 1.2421  | 1.0276  | 1.5833  |
| PBANKA_110260 | 0.5053  | -0.1014 | 0.2002  | 0.571   | -0.0334 | -0.2911 | -0.4705 | -0.3982 | -1.1394 | -1.1542 | -0.5592 | -0.9654 |
| PBANKA_135670 | 0.0035  | -0.216  | -0.3143 | -0.214  | -2.422  | -0.4106 | -0.1728 | 0.089   | -0.0763 | 0.8595  | 0.9098  | 0.5509  |
| PBANKA_041130 | 0.1038  | -0.314  | -0.0937 | 0.3486  | -0.1461 | -0.0534 | 0.0876  | 0.3972  | 0.7528  | 0.8713  | 0.7104  | 0.4815  |
| PBANKA_020040 | -0.3315 | -0.0159 | -0.6853 | -1.3361 | -0.5802 | -0.6101 | -0.5658 | -0.0686 | 0.6846  | 0.9175  | 1.523   | 1.6229  |
| PBANKA_133510 | 0.2463  | 0.2261  | 0.0826  | 0.4387  | 0.1763  | -0.1067 | 0.1793  | 0.1423  | 0.2296  | 0.0208  | -0.2238 | 0.2992  |
| PBANKA_020480 | 0.1907  | -0.0953 | 0.1295  | -0.0984 | 0.4793  | 0.0728  | 0.1119  | 0.1245  | 0.0089  | -0.0235 | -0.0155 | 0.1108  |
| PBANKA_132350 | -1.0355 | -0.7678 | -0.9126 | -0.7532 | -0.2376 | 0.0147  | -0.0785 | 0.5494  | 0.8127  | 0.8433  | 0.379   | 0.1121  |
| PBANKA_114450 | 0.1875  | -0.5384 | 0.3547  | 0.8122  | 0.6928  | 0.702   | -0.3044 | -0.6013 | -0.3829 | -0.8103 | -0.8112 | -0.4644 |
| PBANKA_145230 | 0.2194  | -0.9693 | 0.0234  | 0.5501  | 0.4188  | 0.4069  | 0.0211  | -0.4457 | 0.0351  | -0.6771 | -0.9769 | 0.167   |
| PBANKA_082800 | 0.1156  | -0.0022 | 0.004   | -0.3301 | -0.0797 | 0.2421  | 0.2437  | 0.2887  | 0.0513  | 0.1822  | 0.2067  | 0.2469  |
| PBANKA_131320 | 0.1091  | -1.2133 | 0.226   | 0.4421  | 0.4378  | 0.388   | 0.4397  | 0.3289  | -0.1681 | -0.534  | -0.415  | 0.3526  |
| PBANKA_050710 | -0.6813 | -0.2494 | -0.419  | 0.0204  | 0.0368  | 0.2176  | 0.2093  | 0.0386  | -0.1856 | -0.5175 | -0.7534 | -0.5543 |
| PBANKA_144050 | 0.5819  | -0.0396 | 0.7936  | 0.6883  | 0.3421  | 0.613   | 0.2804  | 0.2057  | 0.0271  | -0.3393 | -0.8428 | -1.3127 |
| PBANKA_060090 | -0.3134 | -0.1398 | -0.042  | 0.335   | 0.0063  | 0.2211  | -0.1353 | 0.368   | 0.5347  | 0.4912  | 0.1715  | 0.517   |
| PBANKA_122010 | 0.5438  | 0.1964  | 0.2997  | 0.4498  | 0.2095  | 0.2627  | -0.1432 | -0.0627 | -0.5307 | -0.4555 | -0.4642 | -0.6481 |
| PBANKA_103630 | 0.1085  | -0.005  | -0.0781 | -0.1278 | -0.0673 | -0.0078 | -0.347  | -0.1861 | 0.3263  | 0.6038  | 1.3678  | 1.2029  |
| PBANKA_120950 | 0.1873  | -0.123  | -0.041  | 0.1803  | -0.3366 | -0.0794 | 0.1608  | 0.1629  | 0.0099  | -0.2364 | -0.167  | -0.4829 |
| PBANKA_142130 | 0.545   | 0.4339  | 0.3643  | 0.7325  | 0.3333  | 0.4257  | -0.3467 | -0.4592 | -0.2333 | -0.3423 | 0.0364  | 0.2478  |
| PBANKA_134630 | -0.1481 | 0.3918  | 0.0397  | -0.478  | 0.3145  | 0.0937  | 0.159   | -0.1013 | 0.3135  | 0.5194  | 0.3501  | 0.654   |
| PBANKA_114100 | 0.0648  | 0.91    | 0.1628  | 0.4324  | 0.2404  | 0.2192  | 0.3002  | 0.0962  | -0.3172 | -0.9573 | -1.1515 | 0.0077  |
| PBANKA_021470 | 0.0693  | -0.0563 | -0.103  | -0.0689 | -0.2899 | -0.0156 | 0.1788  | 0.3953  | 0.3562  | 0.6178  | -0.0412 | 0.7552  |

|               |         |         |         |         |         |         |         |         |         |         |         |         |
|---------------|---------|---------|---------|---------|---------|---------|---------|---------|---------|---------|---------|---------|
| PBANKA_031500 | -0.0331 | 0.6091  | 0.3116  | 0.1011  | 0.27    | 0.2757  | 0.1385  | -0.3368 | -0.5113 | -0.6994 | -0.3918 | -0.5349 |
| PBANKA_136460 | 0.3711  | 0.1138  | 0.3764  | 0.1264  | 0.1918  | 0.0603  | 0.2434  | 0.2871  | 0.0819  | -0.179  | -0.4241 | -0.2851 |
| PBANKA_103140 | 0.205   | 0.0805  | 0.0256  | 0.3735  | 0.1573  | 0.3464  | -0.0462 | -0.0312 | 0.076   | -0.1693 | -0.4989 | -0.5301 |
| PBANKA_122840 | 0.3018  | 0.7351  | 0.2394  | 0.315   | 0.2797  | -0.2013 | -0.2336 | -0.2432 | -0.1464 | -0.3831 | -0.3918 | 0.1258  |
| PBANKA_144740 | -0.3632 | -0.5835 | -0.0411 | 0.2629  | -0.1027 | 0.0188  | 0.3552  | 0.194   | 0.2613  | -0.022  | 0.1659  | -0.3076 |
| PBANKA_144480 | -0.2696 | 0.687   | -0.1831 | 0.5903  | 0.2871  | 0.4095  | -0.1281 | 0.2143  | 0.1793  | 0.2296  | 0.9369  | 1.0772  |
| PBANKA_135440 | 0.3507  | 0.1287  | 0.4453  | 0.3511  | 0.2918  | 0.0257  | -0.4904 | -1.0494 | -1.0053 | -1.6117 | -0.9591 | -0.4506 |
| PBANKA_136110 | 0.4689  | 0.474   | -0.1004 | -0.0359 | -0.0707 | 0.0184  | -0.1737 | -0.0461 | -0.2869 | -0.3249 | -0.2543 | -0.0887 |
| PBANKA_021350 | 0.4361  | 0.3881  | -0.1467 | -0.2935 | -0.6532 | -0.5245 | -0.8439 | -0.382  | 0.2842  | 0.7534  | 1.1326  | 1.5162  |
| PBANKA_110850 | -0.8358 | -0.5831 | -0.5504 | -0.48   | -0.4202 | 0.111   | -0.1448 | 0.3994  | 1.0781  | 1.4387  | 0.5962  | 0.2799  |
| PBANKA_130890 | -0.6499 | 1.4113  | 0.0497  | 0.1319  | -0.6117 | -0.5123 | -0.0848 | -0.7041 | -1.156  | -0.4122 | 0.3416  | 0.9186  |
| PBANKA_081230 | -1.4673 | -1.3657 | -1.162  | -0.8691 | -0.0345 | 0.5103  | 0.6786  | 0.6954  | 0.5298  | 0.4741  | -1.0348 | -0.8759 |
| PBANKA_040650 | 0.0513  | 0.1803  | 0.1211  | -0.035  | 0.2671  | -0.2219 | -0.467  | -0.6253 | -0.9486 | -1.2947 | -1.2728 | -1.1096 |
| PBANKA_135900 | -0.8175 | 0.5427  | -0.1122 | -0.3547 | 0.165   | 0.0163  | -0.099  | -0.3865 | -0.3478 | -0.3075 | -0.2903 | -0.4591 |
| PBANKA_092660 | 0.3076  | 0.6781  | 0.259   | 0.1822  | 0.2562  | 0.3721  | -0.2269 | 0.0385  | -0.0433 | -0.2027 | -0.2927 | 0.3491  |
| PBANKA_110120 | 0.1596  | -0.4341 | -0.7557 | -0.5369 | -0.7433 | -0.4448 | -0.6901 | -0.0226 | 0.5     | 1.3468  | 1.3988  | 1.6047  |
| PBANKA_061760 | -0.008  | -0.3422 | -0.0694 | -0.1963 | -0.1817 | 0.083   | -0.3105 | -0.1076 | 0.4787  | 0.2084  | 0.0098  | 0.9652  |
| PBANKA_080930 | -0.5604 | -0.6146 | -0.0325 | 0.1851  | 0.2104  | 0.2855  | 0.3905  | 0.2596  | -0.1758 | -0.3263 | -0.9381 | -1.0052 |
| PBANKA_143970 | -0.4044 | -1.1629 | -0.0398 | 0.2495  | 0.3705  | -0.4593 | 0.4037  | 0.1444  | 0.1421  | -0.1691 | -0.8301 | -0.6324 |
| PBANKA_120210 | 0.3752  | 1.1689  | 1.1916  | 0.0119  | 0.3542  | 0.0432  | -0.1642 | 0.0444  | -0.2113 | -0.2783 | -0.4359 | 0.5538  |
| PBANKA_145320 | 0.2087  | 0.9142  | 0.2991  | 0.3222  | 0.3837  | 0.2588  | -0.1031 | -0.1363 | -0.3159 | -0.6195 | -0.6804 | -0.7991 |
| PBANKA_050200 | 0.0142  | -0.3296 | -0.0571 | 0.1543  | 0.0676  | -0.7456 | -0.3107 | -0.2478 | 0.2593  | 0.0952  | 0.31    | 0.3731  |
| PBANKA_081740 | 0.2835  | 0.3409  | 0.3219  | 0.5342  | 0.4573  | -0.6379 | -0.0082 | -0.1348 | -0.0555 | -0.3349 | -0.6269 | -0.519  |
| PBANKA_070750 | 0.0997  | 0.328   | 0.2696  | -0.2733 | 0.097   | -0.0563 | -0.3292 | -0.5674 | -0.768  | -1.0225 | -0.928  | -0.3643 |
| PBANKA_124280 | 0.5178  | 0.613   | 0.2551  | 0.1692  | 0.0065  | 0.1069  | -0.6406 | -0.5096 | -0.5806 | -0.5252 | -0.3165 | -0.3265 |
| PBANKA_124410 | 0.5554  | 0.494   | 0.2614  | 0.4026  | 0.2193  | 0.1781  | -0.056  | -0.4644 | -0.6144 | -0.4935 | -0.2779 | -0.4811 |
| PBANKA_121010 | 0.3252  | 0.5581  | 0.0818  | 0.016   | 0.1059  | -0.3203 | -0.3193 | -0.3137 | -0.5642 | -0.353  | -0.2292 | -0.3089 |
| PBANKA_121490 | 0.3314  | 0.0448  | 0.1712  | 0.0408  | 0.0098  | 0.0456  | 0.064   | 0.2555  | -0.4288 | -0.2953 | -0.1334 | -0.2779 |
| PBANKA_010300 | -0.0442 | -0.3964 | 0.2733  | 0.5011  | 0.6894  | 0.758   | 0.5599  | 0.2081  | 0.189   | -0.4306 | -0.3834 | -1.0812 |
| PBANKA_061120 | 0.0748  | 0.5644  | 0.4599  | -0.0443 | 0.4492  | 0.5082  | 0.0145  | -0.2167 | -0.3022 | -0.3785 | -0.3726 | -0.3095 |
| PBANKA_070250 | 0.6231  | 0.5666  | 0.5214  | -0.0122 | 0.12    | 0.2404  | -0.2009 | -0.2708 | -0.5029 | -0.4526 | -0.1303 | 0.0193  |
| PBANKA_100830 | 0.2678  | -0.2088 | 0.218   | 0.3086  | 0.0144  | 0.3094  | 0.2626  | -0.2293 | -0.4191 | -0.4212 | -0.3475 | -0.3709 |
| PBANKA_081690 | 0.2957  | 0.0291  | 0.219   | 0.3924  | 0.6305  | 0.556   | 0.3172  | 0.1143  | -0.0084 | -0.2868 | -0.4344 | -0.9936 |
| PBANKA_124590 | 0.4507  | 0.9882  | 0.2566  | -0.0729 | 0.0685  | -0.0977 | -0.3026 | -0.3221 | -0.1899 | 0.0276  | 0.2771  | 0.8089  |
| PBANKA_100030 | -0.0752 | 0       | 0.2878  | 0.176   | 0.1343  | -1.0628 | -0.0443 | -0.4082 | -0.434  | -0.854  | 0.0105  | -0.4051 |
| PBANKA_040220 | -0.341  | -0.3331 | -0.6139 | 0.0842  | -0.9585 | -0.0669 | -0.9489 | -1.6408 | -1.7871 | -1.3866 | -1.1911 | -0.6236 |
| PBANKA_051300 | -0.147  | 0.1286  | -0.0275 | -0.072  | -0.0314 | -0.1783 | 0.1541  | 0.3723  | 0.8668  | 0.7333  | 1.4837  | 0.53    |
| PBANKA_052200 | -0.2132 | -0.1745 | -0.1249 | 0.0193  | -0.0032 | 0.0901  | 0.3184  | 0.7494  | 0.6139  | 0.3948  | -0.3684 | -0.629  |
| PBANKA_093110 | -0.5824 | -0.2934 | -0.062  | -0.1611 | 0.3428  | 0.7772  | 0.4092  | 0.4414  | 0.524   | 0.4103  | 0.3269  | 0.6247  |
| PBANKA_060270 | 0.0726  | -0.0712 | 0.269   | 0.3677  | 0.5554  | 0.3261  | 0.2845  | -0.224  | -0.588  | -1.3875 | -0.9699 | -1.803  |
| PBANKA_020800 | -1.1791 | -1.1913 | -1.227  | -0.1998 | 0.1055  | 0.7094  | 0.8683  | 0.704   | 0.4934  | 0.175   | -0.8317 | -0.8575 |
| PBANKA_130870 | -0.1564 | 0.076   | 0.1396  | 0.6029  | 0.2362  | 0.4468  | 0.1406  | -0.1001 | -0.3146 | -0.777  | -0.5155 | -0.4216 |
| PBANKA_041000 | -0.4522 | 0.0597  | 0.2039  | 0.3615  | 0.3378  | 0.4294  | 0.0246  | -0.3215 | -0.7603 | -1.0717 | -0.8983 | -1.1079 |
| PBANKA_072040 | -0.188  | -0.3436 | -0.4038 | -0.9365 | -0.5716 | -0.5608 | -0.7633 | -0.381  | 0.2583  | 0.7833  | 0.7467  | 1.4566  |
| PBANKA_141880 | -0.2932 | -0.1666 | 0.1014  | 0.4315  | 0.1284  | 0.3509  | 0.2934  | 0.0312  | -0.2499 | -0.9174 | -0.8611 | -1.254  |
| PBANKA_103970 | -0.6943 | -0.2136 | -0.286  | -0.2107 | -0.0809 | -0.2209 | -0.1565 | -0.2225 | 0.0225  | -0.024  | -1.1024 | -0.8935 |
| PBANKA_092840 | 0.5521  | 0.2751  | 0.02    | 0.7323  | 0.0849  | 0.6317  | 0.0901  | 0.4742  | 0.1082  | 0.2757  | 0.3432  | -0.0888 |
| PBANKA_094010 | 0.2692  | 0.4355  | 0.1653  | 0.2561  | -0.0455 | -0.0808 | 0.1994  | 0.5189  | 0.3201  | 0.3804  | 0.2206  | -0.3072 |
| PBANKA_134700 | -0.5011 | -0.5568 | -0.6411 | -0.3603 | -0.5533 | -0.3292 | 0.1846  | 0.6282  | 0.9899  | 1.3612  | 0.9155  | 0.5372  |
| PBANKA_123590 | 0.4581  | 0.1033  | 0.3548  | 0.7858  | 0.1199  | 0.6406  | 0.0957  | 0.0964  | 0.0054  | -0.2727 | -0.5055 | -0.598  |
| PBANKA_120220 | 0.5286  | 0.2812  | 0.5983  | 0.1006  | 0.5305  | 0.2928  | -0.1183 | -0.3019 | -0.2897 | -0.4249 | 0.1715  | 0.1839  |
| PBANKA_103410 | -0.0973 | 0.4571  | 0.1656  | -0.2573 | -0.0649 | -0.1936 | -0.0164 | 0.176   | -0.0948 | 0.0137  | -0.5599 | -0.0643 |
| PBANKA_121690 | 0.2154  | 0.3021  | -0.007  | 0.1489  | -0.1198 | 0.1265  | -0.2038 | -0.1965 | -0.2224 | 0.0895  | -0.3272 | 0.7422  |
| PBANKA_132870 | 0.4238  | 0.2415  | 0.1217  | 0.3598  | 0.2413  | 0.4015  | -0.0745 | 0.0005  | -0.1061 | -0.5473 | -0.3098 | -0.8504 |
| PBANKA_135180 | 0.1731  | 0.2556  | 0.1351  | 0.4928  | 0.5486  | 0.1741  | 0.2002  | 0.0423  | -0.1053 | -0.8202 | -0.9907 | -0.6967 |
| PBANKA_081420 | 0.0318  | -0.4472 | 0.4617  | 0.4077  | 0.5425  | 0.6986  | -0.2131 | -0.5542 | -1.0089 | -1.5848 | -1.3183 | -2.1297 |
| PBANKA_050550 | -0.6682 | 0.1029  | -0.3446 | 0.2578  | 0.0671  | -0.0723 | 0.2324  | 0.5907  | 0.4276  | 0.3892  | -0.4902 | 0.7821  |
| PBANKA_120100 | 0.1474  | 0.4594  | 0.02    | 0.3466  | 0.1594  | 0.4078  | -0.1669 | -0.2878 | -0.3331 | -0.61   | -0.0683 | -0.9109 |
| PBANKA_030790 | 0.7681  | 1.0334  | 0.3757  | 0.3138  | 0.1423  | 0.3056  | -0.4125 | -0.5874 | -0.6171 | -0.3691 | 0.5854  | -0.5111 |
| PBANKA_143860 | -0.632  | 0.1145  | -0.0634 | 0.1799  | -1.0025 | 0.0755  | 0.1102  | -0.2904 | -0.5901 | -0.7837 | -0.4082 | -1.4517 |
| PBANKA_146050 | -0.3662 | 0.2086  | -0.4642 | -0.0066 | -0.2745 | -0.3186 | -0.1602 | 0.0743  | 0.141   | 0.7046  | 0.507   | 0.1194  |
| PBANKA_110940 | 0.188   | 0.4237  | 0.1185  | 0.0588  | 0.2173  | -0.686  | 0.0569  | 0.2276  | 0.0334  | -0.5362 | -0.4878 | 0.0323  |
| PBANKA_103390 | 0.4588  | 0.46    | 0.1797  | 0.2291  | 0.0082  | -0.2753 | -0.2728 | -0.7181 | -0.9181 | -1.1407 | -0.2769 | -0.233  |

|               |         |         |         |         |         |         |         |         |         |         |         |         |
|---------------|---------|---------|---------|---------|---------|---------|---------|---------|---------|---------|---------|---------|
| PBANKA_122920 | 0.3607  | 0.8469  | 0.6335  | 0.3563  | 0.1492  | 0.1156  | -0.5224 | -0.4621 | -0.3128 | -1.167  | -0.535  | -0.0562 |
| PBANKA_144380 | 0.4878  | 0.6955  | 0.243   | 0.0629  | 0.1406  | 0.2012  | -0.1216 | 0.2666  | -0.1164 | 0.3132  | 1.0501  | 1.1204  |
| PBANKA_092940 | -0.688  | -0.6282 | -0.3937 | -0.4225 | -0.1823 | -0.077  | 0.3346  | 0.4771  | 0.7206  | 0.8431  | 0.6736  | 0.5622  |
| PBANKA_114010 | -0.088  | -0.07   | -0.0321 | -0.525  | 0.1212  | -0.0232 | 0.1086  | -0.2405 | -0.6174 | -0.2375 | -0.0791 | -0.4361 |
| PBANKA_132800 | -0.1455 | -0.1638 | 0.3613  | 0.1275  | 0.2218  | 0.3815  | 0.0431  | -0.0963 | 0.3672  | 0.4757  | 0.6163  | 0.4234  |
| PBANKA_121320 | -0.0951 | -0.0354 | -0.0307 | -0.0247 | -0.3175 | -0.6035 | 0.1115  | 0.6458  | 1.1671  | 1.184   | 1.2402  | 1.4175  |
| PBANKA_020310 | -0.0329 | -0.1065 | -0.1436 | 0.0787  | 0.2311  | -0.2159 | -0.0816 | 0.0645  | 0.0442  | -0.3705 | -0.3675 | -0.5962 |
| PBANKA_133480 | -0.1962 | -0.909  | -0.1574 | 0.3919  | -0.3225 | 0.2963  | -0.1474 | -0.1236 | 0.5936  | 0.5536  | 1.2079  | 0.6415  |
| PBANKA_110350 | -0.0559 | 0.1741  | -0.6163 | -0.2478 | -0.1658 | 0.442   | -0.4041 | -0.4379 | -0.679  | -0.5351 | -0.0312 | -0.5864 |
| PBANKA_142950 | 0.249   | 0.6502  | 0.1833  | 0.1277  | 0.1125  | 0.0761  | -0.124  | -0.5471 | -0.9766 | -0.8204 | -0.2917 | -0.4525 |
| PBANKA_121890 | -0.1301 | 0.3386  | 0.3609  | 0.4352  | 0.3412  | 0.4737  | 0.2569  | 0       | -0.5962 | -1.9048 | -1.3109 | -3.38   |
| PBANKA_090030 | 0.5083  | 0.1483  | 0.1898  | 0.7471  | -0.1783 | 0.1425  | -0.5869 | -0.0976 | 0.198   | 0.5351  | 1.6733  | 1.3947  |
| PBANKA_061260 | 0.2894  | 0.2852  | 0.3301  | 0.2345  | 0.0181  | -0.2001 | 0.5659  | 0.6438  | 0.2255  | 0.361   | -0.2721 | -0.0094 |
| PBANKA_101400 | -0.1684 | -0.4445 | -0.4429 | -0.6885 | -0.0619 | 0.2838  | -0.0238 | -0.4038 | -0.1028 | -0.6536 | -1.1546 | -0.6772 |
| PBANKA_121150 | 0.3316  | 0.4111  | -0.101  | 0.0716  | -0.2348 | -0.1562 | -0.507  | -0.5014 | 0.0233  | 0.3006  | 1.103   | 1.4107  |
| PBANKA_102100 | 0.5368  | 0.7607  | 0.3627  | 0.4362  | 0.2248  | 0.2601  | -0.5494 | -0.5184 | -0.3369 | 0.0398  | 0.4786  | 0.78    |
| PBANKA_093940 | -0.7017 | 0.1132  | 0.1793  | 0.0961  | 0.2107  | 0.2169  | 0.2444  | -0.1025 | -0.4357 | -0.6009 | -0.903  | -0.7017 |
| PBANKA_070120 | -0.0789 | -0.496  | -0.0671 | -0.217  | 0.2092  | -0.2036 | 0.2288  | 0.4991  | 0.4514  | 0.4494  | 0.1695  | 0.0018  |
| PBANKA_052000 | -0.0769 | 0.5515  | -0.0333 | 0.1957  | 0.031   | 0.5768  | 0.0645  | 0.0352  | -0.3777 | -0.0217 | -0.1682 | -0.4855 |
| PBANKA_113090 | 0.1924  | -0.0301 | -0.3975 | -0.4377 | -0.6329 | -0.7566 | -0.8201 | -0.3594 | 0.33    | 0.9348  | 0.9755  | 1.4711  |
| PBANKA_070580 | 0.0531  | 0.1286  | -0.0269 | -0.0036 | 0.1333  | 0.0867  | -0.0583 | 0.0969  | -0.1179 | -0.1666 | -0.1724 | -0.0791 |
| PBANKA_041480 | 0.255   | 0.4516  | 0.1697  | -0.0869 | 0.0778  | 0.0898  | 0.0813  | -0.6051 | -0.5472 | -0.4377 | -0.2903 | 0.1372  |
| PBANKA_094310 | 0.3879  | -1.2594 | 0.1544  | 0.1179  | 0.015   | -0.4883 | -0.3543 | -0.3117 | -0.402  | -0.4034 | -0.387  | -0.4728 |
| PBANKA_123230 | 0.4251  | -0.1075 | 0.4601  | 1.0004  | 0.2625  | 0.8375  | 0.2629  | 0.4568  | 0.4268  | 0.1856  | -0.245  | 0.7533  |
| PBANKA_010840 | 0.1029  | -0.2756 | -0.0048 | 0.092   | 0.3968  | 0.0328  | -0.1322 | 0.1652  | 0.2542  | 0.2892  | -0.3504 | -0.892  |
| PBANKA_132760 | 0.6014  | 0.3485  | 0.1338  | 0.4475  | 0.1791  | 0.1606  | 0.0723  | -0.0363 | 0.1617  | -0.0513 | 0.2253  | 0.6755  |
| PBANKA_142650 | -0.6581 | -0.2313 | -0.2049 | -0.4254 | 0.2928  | 0.0726  | 0.1508  | 0.2095  | 0.2418  | 0.3721  | 0.3325  | -0.2261 |
| PBANKA_092070 | -0.394  | -0.2195 | -0.4741 | 0.3597  | -0.3918 | -0.8611 | -0.6047 | 0.2263  | 0.88    | 1.1567  | 1.214   | 0.3362  |
| PBANKA_144030 | 0.722   | 0.3568  | 0.1438  | 0.2559  | -0.0762 | -0.2247 | -0.8101 | -0.5802 | -0.0384 | -0.1488 | 0.6957  | 1.0021  |
| PBANKA_123330 | 0.4994  | 0.6523  | 0.1255  | 0.2824  | 0.1389  | 0.1262  | 0.1245  | 0.1679  | -0.0024 | -0.2314 | -0.2776 | -0.665  |
| PBANKA_144760 | -0.0958 | 0.3725  | 0.314   | -0.2535 | 0.0574  | 0.8157  | -0.0291 | -0.2867 | -0.2306 | -0.1837 | -0.1691 | -0.2614 |
| PBANKA_081790 | -0.9633 | -0.2403 | -1.244  | -1.0909 | -0.6178 | -0.4755 | 0.1817  | 0.4195  | 0.9256  | 1.1596  | 0.8132  | 1.6501  |
| PBANKA_072080 | -0.0234 | 0.1723  | -0.3349 | -0.5906 | -0.5423 | -0.7554 | -0.5442 | -0.1844 | 0.0495  | 0.6603  | 1.3561  | 1.6666  |
| PBANKA_132200 | 0.0525  | 0.6108  | 0.3359  | 0.3143  | -0.0454 | -0.2529 | -0.0339 | 0.1058  | -0.0766 | 0.0377  | 0.394   | -0.4653 |
| PBANKA_133890 | -1.4188 | -0.8813 | -1.2398 | -0.9131 | -0.6178 | -0.1745 | 0.3983  | 0.7688  | 0.6138  | 1.1602  | 0.4357  | 0.5859  |
| PBANKA_010490 | 0.3204  | 0.6128  | 0.3451  | 0.0704  | 0.1923  | 0.3275  | -0.214  | -0.2726 | -0.3697 | -0.6156 | -0.666  | -0.5876 |
| PBANKA_143540 | 0.0996  | -0.4895 | 0.1817  | 0.2997  | 0.2714  | 0.5338  | 0.1749  | 0.1927  | 0.1564  | -0.1031 | -0.3206 | -0.5317 |
| PBANKA_140040 | 1.0966  | 1.2697  | 0.8752  | 0.2737  | 0.089   | -0.0964 | -0.6065 | -0.8835 | -0.9924 | -1.0717 | -0.4265 | -0.3017 |
| PBANKA_072060 | 0.0381  | 0.0269  | 0.0505  | 0.4098  | 0.3091  | 0.2709  | -0.162  | -0.2981 | -0.4988 | -0.4714 | -0.28   | -1.1478 |
| PBANKA_111170 | -0.0694 | -0.3301 | 0.4454  | 0.388   | 0.504   | 0.5104  | 0.0698  | 0.0099  | -0.31   | -0.775  | -1.4164 | -0.6719 |
| PBANKA_136350 | -0.0641 | -0.6861 | 0.3407  | 0.9382  | 0.7051  | 0.5795  | -0.1329 | -0.3484 | -0.1926 | -0.8241 | -1.1702 | -0.9502 |
| PBANKA_130150 | 0.2411  | -0.1711 | -0.2297 | 0.0316  | 0.1759  | -0.459  | -0.4484 | -0.5941 | -0.8251 | -0.3596 | -0.9933 | -0.5045 |
| PBANKA_020260 | 0.2701  | -0.3911 | 0.0251  | 0.2604  | 0.0452  | -0.0249 | -0.0538 | -0.4139 | -0.1691 | -0.7361 | -0.3943 | -0.2658 |
| PBANKA_144250 | 0.1507  | 0.2835  | -0.0526 | 0.0117  | -0.278  | -0.2514 | -0.4319 | -0.6056 | 0.0258  | 0.361   | 1.1842  | 1.5452  |
| PBANKA_124480 | 0.3829  | 0.2452  | 0.1835  | 0.3413  | 0.2118  | 0.4692  | -0.0154 | -0.3132 | -0.3326 | -0.2207 | -0.0979 | -0.5628 |
| PBANKA_080200 | -0.6158 | -0.546  | -0.5745 | -0.5191 | -0.1529 | -0.3923 | 0.2073  | 0.8064  | 0.7933  | 1.148   | -0.0323 | -0.7543 |
| PBANKA_114030 | 0.4705  | -0.1805 | 0.3078  | 0.2385  | 0.1025  | 0.1266  | -0.0798 | -0.1843 | -0.0367 | -0.0011 | 0.2552  | 0.1614  |
| PBANKA_093850 | -0.5703 | -0.3515 | -0.1273 | -0.0793 | 0.4306  | 0.5542  | 0.439   | 0.2253  | 0.0144  | -0.4926 | -0.3308 | -0.5161 |
| PBANKA_121950 | 0.1772  | 0.9649  | -0.0885 | 0.2188  | 0.0889  | 0.1082  | -0.4743 | -0.5926 | -0.6788 | -0.7665 | 0.1399  | -0.0692 |
| PBANKA_132860 | -0.2883 | -0.3331 | 0.4021  | 0.1223  | 0.3284  | -0.0237 | -0.1299 | -0.3653 | -0.7521 | -0.9319 | -0.6517 | -0.6473 |
| PBANKA_112170 | 0.2393  | 0.1069  | 0.4942  | 0.1475  | 0.2286  | -0.1987 | -0.1699 | -0.2827 | -0.299  | -0.3311 | -0.1308 | 0.1417  |
| PBANKA_136380 | 0.6791  | 0.4123  | 0.5645  | 0.0507  | 0.266   | -0.0317 | 0.0577  | -0.2859 | -1.2737 | -0.5367 | -0.7987 | -0.3587 |
| PBANKA_141040 | 0.0576  | 1.0858  | 0.3542  | -0.0742 | -0.0214 | -0.2572 | -0.7483 | -0.8197 | -1.0826 | -0.6626 | -0.5794 | -0.7354 |
| PBANKA_135770 | -0.5259 | 0.1452  | -0.5043 | 0.3261  | -0.016  | 0.0998  | -0.0917 | -0.1644 | 0.0058  | -0.0532 | 0.122   | -0.6101 |
| PBANKA_103560 | 0.6929  | 0.4137  | 0.6023  | 0.3292  | 0.0946  | 0.7233  | 0.1945  | -0.1667 | -0.1887 | -0.4055 | -0.5084 | -0.3067 |
| PBANKA_145480 | -0.4956 | 0.3945  | 0.0151  | 0.011   | -0.1296 | 0.8075  | -0.0905 | 0.4163  | 0.1151  | 0.4501  | 0.6315  | 0.7572  |
| PBANKA_132030 | 0.8774  | 0.282   | 0.3527  | 0.2447  | 0.1416  | -0.4026 | -0.4081 | -0.5162 | -1.0786 | -1.0947 | -0.7099 | -1.3211 |
| PBANKA_111620 | -0.3458 | 0.174   | 0.0598  | 0.2713  | 0.1475  | 0.6448  | 0.3521  | 0.3229  | 0.3722  | 0.1948  | -0.1985 | 0.071   |
| PBANKA_080630 | 0.1107  | 0.1292  | -0.0548 | -0.0456 | 0.2208  | -0.0202 | 0.223   | 0.2864  | -0.4421 | -0.0736 | -0.0751 | -0.6779 |
| PBANKA_102270 | 0.5386  | 0.1693  | 0.4923  | 0.512   | 0.2313  | 0.5164  | 0.0597  | -0.0032 | -0.2261 | -0.231  | -0.6432 | 0.5391  |
| PBANKA_083320 | -0.5729 | -0.0003 | -0.1756 | -0.0938 | 0.0662  | -0.0926 | 0.2301  | -0.0903 | -0.1419 | 0.0151  | -0.6548 | -1.0324 |
| PBANKA_134990 | 0.2633  | 0.0097  | 0.0186  | 0.2696  | -0.109  | 0.46    | 0.3573  | 0.0767  | -0.2033 | -0.1051 | -0.2365 | -0.63   |
| PBANKA_010630 | -0.2155 | -0.4758 | -0.1862 | -0.1894 | 0.2095  | 0.3492  | 0.3199  | 0.4936  | 0.5194  | 0.7151  | 0.4249  | 0.5781  |

|               |         |         |         |         |         |         |         |         |         |         |         |         |
|---------------|---------|---------|---------|---------|---------|---------|---------|---------|---------|---------|---------|---------|
| PBANKA_123120 | 0.2578  | 0.4313  | 0.2521  | 0.188   | 0.1155  | 0.4833  | -0.013  | -0.4026 | -0.5078 | -0.7092 | -0.65   | -0.7318 |
| PBANKA_132070 | -0.1513 | -0.0729 | -0.5064 | 0.0011  | 0.3728  | 0.3579  | 0.4299  | 0.0606  | 0.1219  | 0.0932  | -0.5183 | -0.8783 |
| PBANKA_112450 | -0.2598 | 0.671   | 0.2344  | 0.0266  | 0.5162  | -1.0109 | 0.0043  | -0.0324 | -0.2528 | -0.0818 | -0.1471 | 0.4629  |
| PBANKA_135420 | -0.649  | -0.3583 | -0.4733 | 0.0803  | 0.3085  | 0.5636  | 0.4582  | 0.2395  | 0.3426  | 0.1807  | 0.2291  | 0.5857  |
| PBANKA_121430 | 0.2714  | 0.7941  | 0.492   | -0.5007 | 0.6239  | 0.5042  | -0.0568 | -0.0781 | -0.2027 | -0.3971 | 0.0773  | 0.7643  |
| PBANKA_144450 | -0.2666 | -0.7175 | -0.1651 | -0.3306 | -0.0752 | -1.015  | 0.2546  | 0.4549  | 0.8951  | 0.9659  | 0.5018  | -0.145  |
| PBANKA_091900 | -0.4001 | -0.3645 | 0.112   | -0.0006 | 0.4932  | 0.2326  | 0.183   | -0.4147 | -0.9722 | -1.3161 | -1.3839 | -1.5016 |
| PBANKA_110320 | 0.1972  | -0.0921 | 0.1625  | 0.5531  | 0.1369  | 0.4304  | 0.1224  | -0.0373 | -0.0095 | -0.3452 | 0.1552  | -0.1643 |
| PBANKA_093990 | 0.0548  | -0.3767 | 0.277   | 0.5225  | 0.5764  | 0.4178  | -0.2869 | -0.4039 | -0.3761 | -0.7797 | -0.9107 | -0.4408 |
| PBANKA_061380 | -0.0616 | -0.3699 | -0.4758 | -0.2779 | -0.4004 | -0.7255 | -0.5686 | -0.3137 | 0.4246  | 0.2818  | 1.2954  | 0.564   |
| PBANKA_091720 | 0.0831  | 0.119   | 0.1809  | 0.1362  | 0.2718  | 0.1763  | 0.0928  | -0.386  | -0.4609 | -1.0476 | -0.6533 | -1.0185 |
| PBANKA_052040 | -0.1627 | 0.1642  | -0.2868 | -0.2206 | -0.0926 | -0.1472 | 0.3902  | 0.3839  | 0.204   | 0.6829  | -0.1318 | -0.1339 |
| PBANKA_122960 | -0.2287 | 0.3603  | -0.1496 | -0.1405 | -0.3205 | -0.2024 | -0.1935 | 0.165   | 0.3105  | 0.2348  | #####   | 0.5261  |
| PBANKA_103750 | -0.2463 | -1.5968 | -0.214  | -0.4912 | -0.0955 | 0.1021  | 0.2748  | 0.3045  | 0.3514  | 0.6146  | 0.6941  | 0.5587  |
| PBANKA_142510 | -0.0733 | -0.0815 | -0.2659 | -0.0278 | 0.0527  | 0.529   | -0.1224 | -0.6703 | -0.2941 | -0.8081 | -1.0698 | -0.7438 |
| PBANKA_103700 | 0.1713  | 0.4202  | 0.2022  | 0       | 0.0937  | 0.3518  | -0.2382 | 0.0829  | -0.1599 | -0.7671 | -0.6738 | -1.1943 |
| PBANKA_102410 | -0.145  | 0.428   | -0.3446 | -0.608  | -0.6739 | -0.8024 | -0.7306 | -0.2806 | 0.3319  | 0.7295  | 1.3377  | 1.3965  |
| PBANKA_093580 | 0.0739  | -0.6087 | 0.7775  | 0.3587  | 0.1925  | 0.595   | 0.3325  | 0.4035  | 0.2442  | 0.1915  | -0.3415 | -0.2426 |
| PBANKA_100170 | -0.9685 | -0.4689 | -0.5311 | -0.2498 | -0.3055 | -0.417  | 0.7242  | 0.7833  | 1.4019  | 1.4018  | 0.4273  | 0.2229  |
| PBANKA_131020 | 0.3043  | 1.0345  | -0.0087 | -0.0844 | 0.3739  | -0.2302 | 0.2498  | 0.3991  | 0.2587  | 0.086   | -0.6886 | -0.2035 |
| PBANKA_072050 | -0.0761 | 0.5798  | 0.3702  | 0.4023  | -0.0652 | -0.02   | 0.1666  | -0.0957 | -0.2795 | -0.463  | -0.6315 | -0.188  |
| PBANKA_144620 | 0.0713  | 0.0231  | 0.4764  | 0.04    | 0.3278  | 0.1964  | -0.3686 | -0.928  | -0.626  | -0.8381 | -0.091  | 0.6563  |
| PBANKA_121420 | -1.0587 | -0.7232 | -0.6557 | -0.0716 | -0.1471 | 0.3367  | 0.5359  | 0.6355  | 0.2966  | 0.1583  | -0.755  | -0.735  |
| PBANKA_142360 | 0.6575  | 0.4721  | 0.5231  | 0.6093  | 0.4285  | 0.3331  | -0.35   | -0.7373 | -0.8871 | -1.3616 | -1.1815 | -0.4068 |
| PBANKA_061310 | 0.0449  | 0.0918  | 0.1628  | 0.0938  | 0.2276  | 0.8349  | 0.3463  | 0.4197  | 0.3223  | -0.0469 | -0.324  | -0.2725 |
| PBANKA_103510 | 0.747   | 0.6804  | 0.0102  | -0.0689 | -0.3451 | -0.4805 | -0.7073 | -0.5956 | -0.0007 | 0.3325  | 0.8729  | 0.8868  |
| PBANKA_120160 | -0.238  | 0.1921  | 0.1856  | 0.281   | 0.3679  | 0.2126  | -0.1653 | -0.7855 | -0.5909 | -0.9731 | -1.1932 | -1.5077 |
| PBANKA_134610 | 0.2595  | -0.0623 | 0.4386  | 0.1266  | 0.4365  | 0.5094  | -0.125  | -0.1562 | -0.1491 | -0.0072 | 0.7834  | 1.3016  |
| PBANKA_081520 | -0.0041 | 0.2374  | -0.0583 | 0.2471  | 0.1692  | -0.1353 | 0.0299  | 0.225   | 0.128   | -0.1358 | -0.8533 | -0.0975 |
| PBANKA_111210 | -0.1625 | -0.1162 | 0.1337  | 0.249   | 0.2743  | 0.3303  | 0.1605  | -0.0938 | -0.0465 | -0.248  | -0.5699 | -0.8835 |
| PBANKA_093190 | 0.0597  | 0.2091  | -0.2014 | -0.284  | 0.1183  | -0.4943 | 0.2189  | 0.3178  | 0.5848  | 0.5403  | -0.243  | -0.0488 |
| PBANKA_121850 | -0.3968 | 0.0109  | -0.1717 | 0.1609  | -0.0392 | 0.3368  | -0.0431 | 0.1375  | 0.502   | -0.3366 | -0.4066 | -0.4234 |
| PBANKA_134970 | 0.3844  | -0.7918 | 0.1624  | 0.4391  | 0.1707  | 0.3252  | 0.1514  | 0.5094  | -0.2719 | -0.4399 | -0.8172 | -1.227  |
| PBANKA_092020 | 0.1043  | 0.1234  | -0.0441 | 0.353   | 0.1118  | 0.0521  | -0.2555 | -0.1837 | -0.0332 | -0.2272 | -0.4433 | -0.1302 |
| PBANKA_060260 | 0.4733  | 0.1617  | 0.2993  | 0.5257  | 0.1895  | 0.758   | 0.0437  | -0.4719 | -0.2767 | -0.3915 | -0.4245 | -0.3269 |
| PBANKA_080670 | -0.2454 | -0.2947 | -0.3332 | -0.0673 | 0.2226  | 0.2231  | 0.1784  | 0.4198  | 0.1697  | 0.4954  | 0.2817  | -0.3646 |
| PBANKA_100350 | -0.1579 | -0.3031 | 0.0893  | 0.412   | 0.3596  | 0.718   | 0.3459  | -0.6359 | -0.6258 | -0.8159 | -0.6158 | -0.4206 |
| PBANKA_052470 | 0.465   | 0.5677  | -0.0542 | 0.441   | -0.0781 | 0.2389  | -0.0567 | -0.5378 | 0.2007  | 0.3441  | 0.6769  | 1.2044  |
| PBANKA_090400 | -0.223  | -0.6809 | -0.1537 | -0.0861 | 0.0455  | -0.1736 | 0.2209  | 0.4267  | 0.888   | 0.7458  | 1.107   | 0.2304  |
| PBANKA_144060 | 0.3028  | 0.6226  | 0.1151  | 0.0924  | -0.1282 | -0.2535 | -0.1417 | -0.1017 | -0.2531 | -0.1936 | -0.0035 | 0.437   |
| PBANKA_141630 | 0.3651  | 0.5983  | 0.5343  | 0.2315  | 0.089   | 0.0913  | -0.261  | -0.5592 | -0.6922 | -0.9215 | -0.3979 | -0.1284 |
| PBANKA_145500 | -0.1217 | 0.2296  | -0.0792 | 0.2035  | 0.0326  | -0.1935 | -0.306  | -0.237  | 0.0276  | 0.1354  | 0.3164  | 0.2871  |
| PBANKA_143160 | -0.1906 | 0.1833  | -0.0973 | -0.2422 | 0.1523  | 0.0414  | 0.0881  | 0.3071  | -0.0929 | -0.0321 | -0.4254 | -0.4168 |
| PBANKA_090340 | 0.756   | -0.7284 | 0.2553  | 1.0584  | 0.8426  | 0.94    | 0.4951  | 0.1268  | 0.408   | 0.0026  | 0.5644  | -0.8188 |
| PBANKA_113070 | 0.0287  | 0.1565  | 0.352   | 0.4583  | -0.3129 | 0.2325  | 0.3326  | -0.0948 | -0.661  | -0.6529 | -0.8986 | -0.9411 |
| PBANKA_111070 | -0.3129 | 0.0467  | -0.1625 | 0.2422  | 0.024   | -0.1059 | 0.2616  | 0.2189  | 0.2296  | 0.2246  | -0.0197 | 0.0923  |
| PBANKA_041290 | 0.3569  | -1.0367 | -0.1173 | -0.1568 | 0.0467  | -0.783  | -0.2179 | -0.1305 | -0.5105 | -0.1564 | 0.2898  | -0.0094 |
| PBANKA_122670 | 0.3089  | 0.9267  | 0.0319  | -0.4246 | -0.1793 | -0.3429 | -0.0528 | 0.21    | 0.5002  | 0.7708  | 0.2228  | 0.0882  |
| PBANKA_101950 | 0.651   | 0.1011  | 0.3364  | 0.3967  | 0.3022  | 0.0217  | -0.3776 | -0.7587 | -0.7013 | -0.8245 | -0.3976 | 0.0754  |
| PBANKA_140320 | -0.2055 | -0.4934 | -0.0685 | 0.2049  | 0.3662  | -0.1665 | 0.2215  | -0.2768 | -0.5851 | -0.4573 | -0.354  | -0.6153 |
| PBANKA_031490 | 0.3497  | 0.2247  | 0.1128  | 0.3122  | 0.078   | 0.3451  | 0.1369  | 0.1345  | -0.0862 | -0.1734 | -0.2921 | -0.3815 |
| PBANKA_134870 | -1.0373 | 0.4549  | -0.5926 | -0.3313 | -0.2067 | 0.6427  | 0.1798  | 0.513   | 0.4834  | 0.8869  | -0.0936 | -0.322  |
| PBANKA_121840 | -0.0881 | -0.1718 | -0.2527 | 0.0121  | -0.1482 | 0.1804  | 0.0497  | 0.2556  | 0.0163  | -0.1976 | -0.4353 | -0.5033 |
| PBANKA_102680 | -0.1457 | -0.3561 | -0.2293 | 0.1007  | -0.0132 | 0.42    | 0.0252  | 0.3068  | 0.5094  | 0.4213  | 0.1106  | 0.0304  |
| PBANKA_102710 | -0.9533 | -0.9557 | -0.7211 | -0.2422 | -0.0873 | 0.4414  | 0.2698  | 0.4703  | 0.654   | 0.5455  | -0.0423 | -0.8448 |
| PBANKA_122830 | -0.0216 | 0.7797  | 0.3103  | -0.0495 | 0.1524  | 0.3504  | 0.0826  | 0.7514  | 0.3669  | 0.3347  | 0.5911  | 0.5657  |
| PBANKA_030460 | 0.2832  | 0.1847  | 0.3953  | 0.353   | 0.489   | -0.2075 | 0.1707  | 0.072   | -0.0687 | -0.1694 | -0.2973 | 0.3455  |
| PBANKA_100130 | -0.4451 | -0.0117 | -0.4249 | 0.0115  | -0.0789 | 0.097   | 0.3333  | 0.3527  | 0.2761  | 0.3531  | -0.4382 | -0.4064 |
| PBANKA_092860 | 0.2154  | -0.2613 | 0.2436  | 0.9602  | 0.5757  | 0.359   | 0.086   | -0.1468 | -0.0754 | -0.7768 | -0.8141 | -0.4378 |
| PBANKA_081980 | 0.2732  | 0.6258  | 0.1129  | 0.057   | 0.0274  | -0.0013 | -0.1688 | -0.4324 | 0.0461  | -0.0657 | 0.5042  | 0.4556  |
| PBANKA_030660 | -0.5376 | -0.5509 | -0.2824 | -0.5552 | -0.4113 | 0.2734  | 0.3662  | 0.449   | 0.6395  | 0.5042  | 0.7334  | 0.8621  |
| PBANKA_142300 | -0.3243 | -0.2787 | -0.5179 | 0.4034  | -0.4459 | 0.2556  | 0.3805  | 0.4073  | 1.0354  | 1.0755  | 0.7732  | 0.5545  |
| PBANKA_111930 | -0.7534 | -0.8852 | -0.3335 | 0.13    | 0.1452  | 0.2545  | 0.6681  | 0.1736  | 0.1514  | -0.1572 | -0.9637 | -1.1332 |

|               |         |         |         |         |         |         |         |         |         |         |         |         |
|---------------|---------|---------|---------|---------|---------|---------|---------|---------|---------|---------|---------|---------|
| PBANKA_093860 | -0.3406 | 0.221   | 0.2629  | -0.2573 | 0.0964  | -0.1678 | -0.6068 | -0.4596 | -0.4418 | -0.9429 | -0.9982 | -1.0306 |
| PBANKA_101040 | -0.8972 | -0.9473 | -0.935  | -0.6674 | -0.4917 | -0.1909 | 0.3586  | 0.6034  | 1.0667  | 1.1155  | 0.5935  | 0.3334  |
| PBANKA_133030 | 0.2588  | 0.1196  | 0.097   | 0.333   | 0.1067  | 0.4462  | 0.2183  | 0.3407  | 0.3747  | 0.2934  | -0.2055 | -0.2362 |
| PBANKA_081510 | -0.4123 | -0.4233 | -0.3434 | -0.2575 | 0.0098  | 0.2034  | 0.1527  | 0.8226  | 1.4029  | 1.5402  | 0.4987  | 0.6936  |
| PBANKA_051540 | 0.4308  | 0.079   | 0.2395  | 0.2371  | 0.1643  | 0.2969  | 0.3659  | 0.2603  | 0.0574  | 0.0463  | -0.0766 | -0.4024 |
| PBANKA_113210 | 0.5754  | 0.4843  | 0.5086  | 1.0764  | 0.2814  | 0.4302  | 0.0459  | -0.146  | -0.0703 | -0.2396 | -0.4176 | 0.2396  |
| PBANKA_112110 | 0.1771  | 1.0961  | -0.1848 | -0.2345 | -0.1258 | -0.271  | -0.0365 | 0.0068  | 0.272   | 0.1255  | -0.0523 | 0.5992  |
| PBANKA_080920 | 0.2382  | 0.2608  | 0.36    | 0.1438  | 0.4696  | 0.2576  | 0.4129  | 0.5073  | 0.1176  | -0.1495 | -0.4105 | -0.3246 |
| PBANKA_102060 | 0.0165  | -0.3284 | -0.5891 | -0.7438 | -0.3563 | -0.9274 | 0.0234  | -0.8643 | -0.9731 | -0.9038 | -1.5509 | -1.6927 |
| PBANKA_050400 | -0.0808 | 0.9501  | 0.2253  | -0.0674 | 0.3482  | 0.4265  | 0.1519  | 0.2294  | -0.1103 | -0.2589 | -0.3814 | 0.5917  |
| PBANKA_071950 | 0.2468  | 0.2726  | 0.0432  | -0.1285 | 0.114   | 0.2877  | 0.0737  | 0.1894  | 0.3209  | 0.4853  | 0.5162  | 0.0796  |
| PBANKA_092450 | -0.6282 | -0.3259 | -0.2319 | -0.506  | -0.1792 | -0.1289 | 0.2744  | 0.3745  | 0.2473  | 0.4071  | -0.0823 | -0.6199 |
| PBANKA_051610 | 0.1267  | 0.5041  | 0.4227  | 0.2501  | 0.1251  | 0.2237  | 0.1085  | 0.2078  | 0.0366  | -0.1797 | -0.0054 | -0.1081 |
| PBANKA_060900 | 0.3288  | 0.8508  | 0.2998  | 0.843   | 0.0791  | 0.0437  | -0.0957 | -0.1467 | -0.281  | -0.0695 | 0.751   | 0.2826  |
| PBANKA_021240 | 0.158   | -0.2639 | 0.4564  | 0.4341  | 0.292   | 0.8046  | 0.2759  | -0.3666 | -0.4358 | -0.7025 | -1.0069 | -1.3246 |
| PBANKA_082430 | 0.4783  | 0.4804  | 0.3273  | 0.6794  | 0.0201  | 0.4706  | 0.1163  | 0.324   | 0.5815  | 0.0123  | 0.4446  | 0.0814  |
| PBANKA_110380 | -0.5154 | -0.4838 | -0.4178 | -0.2718 | -0.1637 | -0.6995 | 0.0873  | 0.5151  | 0.8987  | 0.9881  | 0.2841  | 0.3756  |
| PBANKA_052440 | -0.0171 | -0.1417 | 0.1624  | 0.2549  | 0.0077  | 0.169   | -0.1502 | -0.0458 | -0.6591 | -0.3029 | -0.1642 | 0.1084  |
| PBANKA_122650 | -0.5698 | -0.3612 | -0.0887 | 0.0617  | 0.265   | 0.217   | 0.2887  | -0.0756 | -0.8469 | -0.9408 | -1.3883 | -1.7623 |
| PBANKA_091610 | -0.8001 | -0.4947 | 0.0678  | 0.2017  | 0.4334  | 0.567   | 0.3955  | 0.2406  | 0.1859  | -0.2792 | -0.8456 | -0.0857 |
| PBANKA_102690 | 0.3844  | 0.9096  | -0.0212 | 0.2168  | -0.1009 | -0.1334 | -0.3826 | -0.5502 | 0.3345  | 0.5173  | 0.9327  | 0.7551  |
| PBANKA_140390 | 0.2679  | 0.3011  | 0.3185  | -0.0061 | 0.1034  | -0.1745 | -0.0643 | -0.579  | -1.0362 | -0.6445 | -0.6032 | -0.615  |
| PBANKA_143780 | 0.3098  | -0.1266 | -0.0888 | 0.3438  | 0.1131  | 0.8315  | 0.4997  | 0.4669  | 0.9184  | 0.7394  | -0.1308 | 0.1545  |
| PBANKA_021320 | -0.0745 | -0.4735 | -0.0601 | 0.0909  | 0.3902  | 0.0083  | 0.2984  | 0.4767  | 0.2241  | 0.2514  | 0.0085  | -0.0212 |
| PBANKA_041420 | -0.0329 | 0.1594  | 0.3907  | -0.0305 | -0.0636 | -0.3503 | 0.1538  | 0.0319  | -0.3859 | -0.4615 | -0.3437 | -0.5375 |
| PBANKA_141440 | 0.3189  | 0.8761  | 0.3017  | -0.0266 | -0.0761 | -0.0446 | -0.1818 | -0.3591 | -0.4324 | -0.0794 | 1.0604  | 0.7648  |
| PBANKA_131520 | -0.0743 | 0.5635  | -0.2107 | 0.0571  | 0.0403  | 0.1716  | 0.0501  | 0.046   | -0.1617 | -0.1928 | -0.2974 | -0.0493 |
| PBANKA_112360 | 0.2828  | -0.0637 | 0.2126  | 0.6177  | 0.317   | 0.3903  | 0.0596  | -0.2515 | -0.3508 | -0.5317 | 0.0066  | -0.6343 |
| PBANKA_113110 | 0.2378  | 0.9085  | 0.2576  | -0.1297 | 0.225   | -0.3708 | -0.4102 | -0.76   | -0.5944 | -0.5351 | -0.5505 | -0.2608 |
| PBANKA_020330 | 0.5232  | -0.1827 | 0.4664  | 0.8242  | 0.4878  | 0.7578  | 0.0951  | 0.0658  | 0.2025  | -0.1977 | 0.3537  | -0.0725 |
| PBANKA_092320 | -0.3872 | -0.1213 | -0.1944 | -0.0675 | 0.0621  | 0.2427  | 0.5896  | 0.174   | 0.0367  | 0.1568  | -0.5468 | -0.4434 |
| PBANKA_070910 | 0.4483  | 0.0934  | 0.4926  | 0.567   | 0.5364  | 0.5533  | -0.1448 | -0.5794 | -0.662  | -1.3523 | -0.8945 | 0.2401  |
| PBANKA_041220 | 0.3153  | 0.8884  | 0.0247  | 0.233   | -0.0637 | 0.1677  | -0.4858 | -0.2465 | 0.1627  | 0.1649  | 0.797   | 1.3382  |
| PBANKA_102070 | 0.9188  | 0.2308  | 0.5406  | 0.202   | 0.1563  | 0.5123  | -0.1014 | -0.4246 | -0.3149 | -0.6176 | -0.633  | -0.1547 |
| PBANKA_140750 | 0.2447  | 0.1235  | 0.4947  | 0.3429  | 0.3142  | 0.456   | 0.1797  | -0.0254 | -0.2875 | -0.6166 | -0.6262 | -0.0148 |
| PBANKA_140560 | 0.4132  | -0.1976 | 0.1585  | 0.2017  | 0.5393  | -0.2571 | 0.0487  | -0.0109 | 0.2349  | 0.5619  | 0.5877  | 1.0265  |
| PBANKA_061410 | -0.8332 | -0.6608 | -0.0301 | 0.0652  | -0.034  | -0.0361 | -0.131  | -0.2415 | -0.2868 | -0.5257 | -0.5627 | -1.1222 |
| PBANKA_110900 | 0.4061  | 0.1826  | 0.3585  | 0.6308  | 0.0978  | 0.0655  | -0.2359 | -0.2551 | -0.4536 | -0.2866 | -0.037  | 0.2033  |
| PBANKA_030960 | -0.1151 | 0.1501  | 0.1636  | 0.5812  | 0.0801  | 0.2358  | 0.1133  | -0.1517 | 0.0631  | -0.1366 | -0.1738 | -0.5223 |
| PBANKA_010330 | 0.5306  | 0.9322  | 0.3127  | 0.3163  | -0.0152 | -0.1839 | -0.4245 | -0.1759 | -0.2366 | -0.1109 | 0.1175  | 0.4203  |
| PBANKA_060430 | -1.5179 | -1.0542 | -0.7804 | -0.266  | 0.2923  | 0.3407  | 0.7067  | 0.2211  | 0.0308  | -0.6352 | -0.7629 | -1.2833 |
| PBANKA_092930 | -0.5351 | -0.2564 | -0.2377 | 0.1589  | 0.2167  | 0.6488  | 0.4571  | 0.384   | 0.3783  | 0.1716  | -0.514  | 0.3087  |
| PBANKA_132150 | -0.388  | -0.0044 | -0.202  | -0.845  | -0.4672 | -1.1702 | 0.1432  | 0.2065  | -0.2252 | 0.1251  | 0.248   | 0.1527  |
| PBANKA_142420 | 0.4238  | 0.5641  | 0.7678  | 0.169   | 0.5867  | 0.0071  | -0.2807 | -0.3514 | -0.9205 | -0.9138 | -0.6912 | -0.3762 |
| PBANKA_134320 | -0.6466 | 0.0008  | -0.886  | -0.6683 | -0.4077 | -0.3589 | 0.0606  | 0.6399  | 0.5276  | 0.9953  | 0.3597  | 0.2366  |
| PBANKA_010220 | 0.6435  | 0.2246  | 0.2647  | 0.625   | 0.1659  | 0.2479  | -0.2945 | -0.1807 | -0.0223 | 0.0119  | 0.4868  | 0.8309  |
| PBANKA_082540 | -0.1371 | -0.3015 | -0.088  | 0.1825  | 0.0504  | -0.2466 | 0.5247  | 0.5802  | 0.5741  | 0.4823  | 0.1387  | 0.0562  |
| PBANKA_040760 | 0.5986  | 1.0162  | 0.4048  | 0.1916  | 0.0864  | -0.2651 | -0.2879 | -0.4535 | -1.6905 | -0.8016 | -0.4419 | 0.1893  |
| PBANKA_040640 | -0.2681 | -0.3507 | -0.5186 | -0.9499 | -0.2398 | -0.6783 | 0.2802  | 0.4935  | 0.8488  | 0.6259  | -0.1325 | -0.3417 |
| PBANKA_120390 | 0.0191  | 0.0659  | 0.426   | 0.1364  | -0.1807 | 0.4998  | 0.0808  | -0.0256 | 0.1306  | 0.1619  | 0.2899  | 0.2968  |
| PBANKA_094060 | -0.2946 | 1.0761  | 0.1301  | -0.0271 | 0.4223  | -0.0557 | 0.1292  | -0.2788 | -0.2806 | -0.211  | -0.5318 | -0.2262 |
| PBANKA_133770 | -0.2136 | 0.3669  | -0.2111 | 0.0966  | -0.0016 | 0.4519  | 0.192   | 0.7897  | 0.1914  | 0.4253  | 0.0274  | 0.2112  |
| PBANKA_131670 | -0.087  | 0.5449  | 0.1645  | 0.4773  | 0.0519  | -0.0372 | -0.1039 | -0.316  | -0.542  | -1.0339 | -0.8888 | -0.1154 |
| PBANKA_000020 | 0.2964  | 0.9868  | 0.3193  | 0.0656  | -0.1117 | -0.1635 | -0.9383 | -0.6895 | -0.4875 | -0.1216 | 1.3527  | 1.3866  |
| PBANKA_092050 | -0.4994 | -0.7663 | -0.8456 | -0.2673 | -0.5884 | -0.2526 | 0.0598  | 1.0528  | 1.2796  | 1.6685  | 0.4669  | -0.6755 |
| PBANKA_051140 | -1.6679 | -2.115  | -2.1947 | -1.014  | -0.8789 | -0.1159 | 0.767   | 1.0676  | 1.7223  | 1.8298  | -0.2372 | -0.9463 |
| PBANKA_071180 | 0.2935  | 0.5002  | 0.2397  | 0.2495  | 0.3534  | 0.4801  | 0.0776  | 0.2019  | 0.1877  | 0.3408  | 0.7956  | 0.4066  |
| PBANKA_140840 | 0.2391  | -0.46   | 0.3287  | 0.6632  | 0.2358  | 0.827   | 0.0252  | -0.4316 | -0.1507 | -0.5242 | -0.695  | 0.0404  |
| PBANKA_124200 | 0.1279  | -0.31   | 0.1364  | 0.0409  | 0.3655  | -0.0613 | 0.1396  | -0.7609 | -0.3739 | -0.3376 | -0.8424 | -0.8872 |
| PBANKA_103840 | -0.7382 | -0.339  | -0.2204 | 0.0768  | 0.0743  | -0.1393 | 0.5721  | 0.4417  | 0.3603  | 0.3479  | -0.3316 | 0.4835  |
| PBANKA_050160 | -1.5739 | -1.7342 | -1.5646 | -1.0459 | -0.9205 | -1.4649 | -1.3022 | -0.5681 | 0.6479  | 0.8268  | 0.447   | -0.1918 |
| PBANKA_092900 | 0.4535  | 0.1893  | 0.2677  | 0.5841  | 0.1578  | 0.282   | 0.3869  | 0.4073  | 0.3525  | -0.1181 | -0.1287 | -0.1962 |
| PBANKA_092460 | -0.0891 | 0.068   | 0.0911  | 0.6251  | 0.215   | 0.3588  | -0.1246 | -0.4582 | -0.7759 | -0.9982 | -0.9843 | -1.0323 |



|               |         |         |         |         |         |         |         |         |         |         |         |         |
|---------------|---------|---------|---------|---------|---------|---------|---------|---------|---------|---------|---------|---------|
| PBANKA_144330 | -2.0393 | -2.078  | -2.5374 | -0.9992 | -0.4993 | 0.5047  | 1.2974  | 1.0567  | 0.9236  | 0.9464  | -1.2842 | -1.7066 |
| PBANKA_071110 | -0.009  | 0.3355  | 0.1668  | -0.2538 | -0.3325 | 0.2639  | 0.1294  | 0.0468  | -0.0307 | -0.0456 | -0.2873 | -0.2307 |
| PBANKA_113130 | 0.0489  | 0.9441  | 0.1753  | 0.0732  | 0.4421  | 0.5508  | 0.0907  | 0.2698  | 0.5973  | 0.0061  | -0.0954 | 1.1525  |
| PBANKA_092240 | 0.0925  | -0.0147 | 0.218   | 0.3622  | 0.3576  | 0.2987  | 0.0875  | -0.2243 | -0.6871 | -0.9157 | -1.2991 | -1.2227 |
| PBANKA_111710 | -1.6521 | -0.6236 | -0.8506 | -0.6727 | 0.1618  | 0.2522  | 0.4301  | 0.5643  | 1.0929  | 0.727   | 0.1596  | -0.4557 |
| PBANKA_041840 | 0.255   | -0.2094 | -0.0958 | 0.4746  | -0.16   | 0.2148  | -0.1544 | -0.3385 | -0.0943 | 0.2169  | -0.052  | -0.3465 |
| PBANKA_132290 | -0.0354 | -0.2367 | -0.3303 | 0.3444  | -0.0344 | 0.5923  | 0.2357  | 0.4256  | 0.6661  | 0.3555  | -0.1802 | -0.0501 |
| PBANKA_133740 | 0.4922  | 0.7715  | 0.4224  | 0.0347  | 0.2511  | -0.0301 | 0.0236  | -0.0989 | -0.372  | -0.5518 | -0.0146 | -0.7046 |
| PBANKA_144820 | 0.1633  | 0.5992  | 0.2542  | 0.2095  | 0.1694  | 0.0521  | -0.2309 | -0.2359 | -0.2151 | -0.3624 | -0.3409 | -0.4853 |
| PBANKA_131050 | -0.9852 | -0.3025 | -0.7909 | -0.2863 | -0.3206 | -0.1249 | 0.4291  | 0.5312  | 0.6437  | 0.7956  | 0.0998  | 0.28    |
| PBANKA_130280 | -0.3014 | -0.2181 | 0.0501  | -0.17   | 0.1794  | 0.8448  | 0.4599  | 0.0854  | -0.4488 | -1.0787 | -1.5828 | -1.6967 |
| PBANKA_131840 | 0.0793  | 0.3556  | 0.4068  | 0.0576  | 0.3302  | -0.1747 | 0.1613  | -0.3756 | -1.1194 | -1.3746 | -1.2291 | -1.8653 |
| PBANKA_104000 | -0.2641 | -0.253  | 0.6259  | 0.6986  | 0.0986  | 0.6407  | 0.6531  | 0.2324  | 0.5197  | 0.1948  | -0.1791 | -0.2292 |
| PBANKA_051380 | 0.2789  | 0.412   | -0.1972 | -0.1074 | -0.071  | -0.3967 | -0.057  | 0.009   | -0.5784 | -0.165  | -0.5864 | -1.2264 |
| PBANKA_021180 | -0.0006 | 0.2402  | 0.1467  | 0.0566  | -0.0671 | 0.7859  | 0.1463  | 0.1301  | 0.1826  | 0.1063  | -0.2248 | 0.1668  |
| PBANKA_112930 | 0.1278  | 0.2558  | 0.2147  | 0.2842  | 0.1163  | -0.2457 | 0.056   | -0.2815 | 0.4533  | 0.3088  | 0.1319  | 1.1029  |
| PBANKA_135640 | -0.4337 | 0.0522  | 0.0978  | 0.2332  | -0.3187 | 0.4011  | 0.2828  | 0       | 0.3029  | -0.0055 | 0.3501  | -0.0037 |
| PBANKA_031000 | 0.2932  | 0.8033  | 0.2357  | 0.5782  | 0.161   | -0.0407 | 0.0854  | -0.2167 | -0.3992 | -0.3347 | -0.5527 | -0.1463 |
| PBANKA_140960 | -0.2198 | -0.3413 | -0.1821 | -0.2876 | -0.2884 | 0.0665  | -0.0404 | 0.5079  | 0.7679  | 1.0905  | 0.5974  | 0.4817  |
| PBANKA_060510 | -0.1702 | 0.3138  | -0.2305 | 0.4252  | -0.173  | -0.1822 | -0.0632 | 0.2128  | 0.395   | 0.497   | 0.3639  | 0.6668  |
| PBANKA_132610 | -0.6919 | -0.27   | -0.5181 | -0.1003 | -0.4201 | 0.1247  | 0.0838  | 0.288   | 0.5424  | 0.9799  | 1.0282  | 1.1291  |
| PBANKA_010060 | -1.1369 | -0.8707 | -0.6768 | -0.6098 | -0.2065 | 0.3417  | 0.5045  | 0.4958  | 0.6554  | 0.7009  | 0.1867  | -0.0977 |
| PBANKA_145890 | 0.0531  | 0.0822  | -0.1979 | 0.1636  | -0.1948 | 0.0268  | 0.2055  | 0.7521  | 0.5079  | 0.4291  | -0.2967 | -0.0471 |
| PBANKA_134130 | -0.1585 | 0.0186  | -0.3389 | 0.0537  | -0.0424 | 0.4579  | 0.1748  | 0.4797  | 0.2515  | 0.2564  | 0.2895  | 0.4881  |
| PBANKA_050460 | 0.1569  | 0.303   | 0.1988  | 0.31    | 0.1574  | 0.0152  | 0.1358  | -0.2505 | -0.548  | -0.471  | -0.3697 | -0.697  |
| PBANKA_101710 | -0.5519 | 0.2825  | 0.3351  | 0.3706  | 0.1239  | 0.7061  | 0.1795  | 0.1288  | 0.1482  | 0.1001  | -0.3296 | -0.6632 |
| PBANKA_140490 | -0.3572 | 0.1753  | 0.2889  | -0.1807 | 0.5169  | 0.2378  | -0.2429 | -0.468  | -0.5344 | -0.3006 | -1.2044 | -1.6417 |
| PBANKA_110440 | 0.012   | -0.0093 | 0.0319  | -0.3694 | 0.0285  | 0.4787  | 0.2937  | 0.5018  | 0.5949  | 0.3601  | -0.1465 | 0.2148  |
| PBANKA_080120 | 0.4475  | 0.9788  | 0.1627  | -0.1112 | -0.2434 | -0.6283 | -0.386  | -0.4755 | -0.2162 | -0.1799 | 0.1992  | 0.3471  |
| PBANKA_093460 | -0.4378 | -0.2992 | -0.0644 | -0.0561 | -0.0652 | -0.5693 | 0.0461  | -0.4037 | 0.4049  | 0.7912  | -0.0274 | -0.0902 |
| PBANKA_040320 | 0.1761  | -0.4206 | -0.4554 | -0.1969 | -0.1944 | -0.637  | 0.2675  | 0.0952  | 0.2935  | 0.0534  | -0.5988 | -0.3739 |
| PBANKA_123110 | 0.8374  | 0.1242  | 0.6605  | 0.7506  | 0.1837  | 0.549   | -0.0372 | -0.4067 | -0.4623 | -0.5678 | -0.5044 | 0.2287  |
| PBANKA_080440 | 0.0877  | 0.3696  | 0.3776  | -0.0818 | 0.2441  | 0.4029  | 0.1302  | -0.3079 | -0.3831 | -0.1526 | -0.2881 | 0.0812  |
| PBANKA_120500 | 0.388   | 0.2569  | 0.4756  | 0.3744  | 0.3133  | 0.1664  | -0.0135 | -1.1392 | -1.1954 | -1.4723 | -0.894  | -1.2566 |
| PBANKA_100710 | 0.3957  | 0.3229  | 0.3925  | 0.4171  | 0.382   | 0.0062  | 0.1782  | 0.1887  | -0.1623 | -0.3367 | -0.5963 | -0.3507 |
| PBANKA_144490 | 0.2207  | 0.6255  | 0.3029  | 0.1314  | 0.5288  | 0.0109  | 0.0088  | -0.1479 | -0.5161 | -0.179  | -0.5875 | -0.5369 |
| PBANKA_131550 | 0.1184  | 0.6274  | -0.0232 | 0.0504  | 0.1086  | 0.2136  | 0.1613  | 0.0826  | -0.1501 | 0.1499  | -0.3891 | -0.3533 |
| PBANKA_114050 | -0.0121 | -0.2556 | -0.022  | 0.1504  | -0.3211 | 0.5374  | 0.3185  | 0.1137  | -0.1305 | -0.3672 | -0.5378 | -0.9121 |
| PBANKA_070290 | -0.1299 | 0.3317  | -0.4297 | -0.2471 | -0.0863 | -0.5144 | -0.0655 | 0.1351  | -0.016  | 0.1169  | 0.1419  | 0.703   |
| PBANKA_050720 | -0.0402 | 0.0172  | 0.1256  | 0.1794  | 0.2209  | -0.0459 | 0.4048  | 0.1349  | 0.0195  | -0.1739 | -0.772  | -0.7218 |
| PBANKA_113580 | -0.0329 | 0.579   | -0.228  | -1.1128 | -0.0157 | -0.15   | 0.4769  | 0.3251  | 0.3484  | 0.4259  | 0.4511  | 0.8031  |
| PBANKA_102300 | -0.1902 | -0.5045 | 0.1076  | 0.1608  | 0.2216  | 0.2166  | -0.2084 | 0.1582  | -0.0461 | -0.0441 | -0.0222 | -0.2012 |
| PBANKA_091020 | -0.3066 | 0.2993  | -0.441  | -0.8824 | -0.1274 | -1.488  | -0.8685 | -2.143  | -2.0788 | -0.9036 | -0.5207 | -0.4777 |
| PBANKA_124150 | 0.2471  | 0.2356  | 0.3281  | 0.466   | 0.5333  | 0.4065  | -0.1208 | 0.1009  | -0.1197 | -0.469  | -0.6414 | -1.2742 |
| PBANKA_041065 | 0.9393  | -0.1495 | 0.4656  | -0.2247 | -0.1166 | -0.9451 | -0.1931 | 0.0817  | -0.0882 | 0.0177  | 0.3138  | 0.1674  |
| PBANKA_130560 | -0.2655 | 0.0533  | 0.0141  | 0.8543  | 0.0062  | 0.5322  | -0.4079 | -0.3197 | -0.7153 | -0.7184 | -0.9302 | -1.1588 |
| PBANKA_050430 | -0.7904 | -0.1869 | -1.0002 | -0.9311 | -0.8487 | -0.9661 | 0.0179  | 0.5538  | 0.9085  | 1.4293  | 1.5277  | 1.2701  |
| PBANKA_131400 | 0.0731  | 0.3472  | 0.2959  | 0.1227  | 0.1032  | -0.348  | 0.1568  | 0.4817  | 0.046   | 0.0315  | -0.4518 | -0.3725 |
| PBANKA_112590 | 0.1051  | 0.2507  | -0.2524 | 0.0831  | -0.059  | -1.0234 | 0.1623  | 0.0039  | 0.3532  | 0.4392  | 0.9977  | 0.9892  |
| PBANKA_103200 | -0.0511 | 0.1462  | -0.2925 | -0.1115 | 0.0949  | 0.5756  | 0.3499  | -0.3139 | -0.2349 | -0.7223 | -0.7502 | -0.9623 |
| PBANKA_132100 | 0.5664  | 0.8612  | 0.314   | 0.4617  | 0.2524  | 0.2796  | -0.2662 | -0.4545 | 0.495   | -0.1138 | 0.6571  | 0.9882  |
| PBANKA_131830 | 0.0688  | 0.2104  | 0.0498  | 0.2951  | 0.1618  | 0.2067  | -0.1559 | -0.2874 | -0.8471 | -1.2034 | -1.0064 | -0.4106 |
| PBANKA_030640 | 0.3792  | 0.5668  | 0.4068  | 0.3083  | 0.388   | 0.537   | 0.2734  | 0.3048  | -0.222  | -0.3892 | -0.7765 | -0.1725 |
| PBANKA_133930 | -0.0926 | 0.5281  | 0.0703  | -0.091  | 0.4387  | 0.2899  | 0.1171  | -0.006  | -0.1192 | 0.1474  | 0.0608  | 0.6505  |
| PBANKA_082480 | -0.0074 | 0.1714  | 0.2807  | -0.0457 | -0.0094 | -0.8919 | -0.1665 | -0.4091 | -0.433  | -0.1047 | 0.5596  | 0.3571  |
| PBANKA_111500 | -0.2953 | 0.0633  | -0.4278 | -0.1798 | 0.0079  | -0.3033 | -0.4608 | -0.1776 | 0.5     | 0.7163  | 0.8583  | 1.282   |
| PBANKA_051390 | -0.9814 | -0.6917 | -0.6041 | 0.2437  | -0.002  | -0.0991 | 0.3963  | 0.3958  | 0.3166  | 0.5843  | -0.1187 | -0.0734 |
| PBANKA_114570 | -0.0044 | 0.1221  | -0.1581 | -0.7183 | -0.2893 | -1.1095 | -0.6576 | -0.5126 | -0.6344 | -0.1009 | 1.0706  | 1.3975  |
| PBANKA_051150 | -0.2733 | -0.0938 | 0.0852  | -0.037  | 0.0661  | 0.2119  | 0.3337  | -0.3416 | -0.5729 | -0.7771 | -1.0765 | -0.8889 |
| PBANKA_113470 | -1.2292 | -1.1349 | -0.9033 | -0.1977 | -0.1273 | 0.0873  | 0.6036  | 0.7429  | 0.7846  | 0.4339  | -0.5837 | -0.4505 |
| PBANKA_051520 | -0.7058 | -0.1659 | -0.867  | -0.5903 | -0.8149 | -0.289  | 0.0912  | 0.486   | 0.8391  | 1.4743  | 0.9319  | 0.3592  |
| PBANKA_141780 | 0.6935  | 0.8062  | 0.2942  | 0.0921  | -0.2545 | 0.3122  | -0.5144 | -0.8507 | -0.3089 | -0.286  | 0.17    | 0.9279  |
| PBANKA_103300 | -0.1134 | 0.1731  | 0.2008  | 0.1361  | 0.472   | -0.621  | -0.2705 | -0.5337 | -0.1012 | -0.1173 | 0.6258  | -0.2144 |

|               |         |         |         |         |         |         |         |         |         |         |         |         |
|---------------|---------|---------|---------|---------|---------|---------|---------|---------|---------|---------|---------|---------|
| PBANKA_121310 | 0.0188  | -0.0842 | 0.2885  | -0.4051 | 0.4654  | -0.1213 | -0.0955 | -0.8624 | -1.1303 | -1.05   | -0.6354 | -0.5912 |
| PBANKA_131530 | -0.3396 | -0.6221 | 0.0519  | -0.0701 | -0.4036 | -0.4654 | -0.4129 | -0.1893 | -0.2203 | 0.2553  | 1.2396  | 1.3226  |
| PBANKA_140830 | 0.3927  | 0.1374  | 0.3824  | 0.2549  | 0.262   | 0.5521  | 0.0918  | -0.7033 | -1.2705 | -1.1984 | -0.9359 | -1.1162 |
| PBANKA_051670 | 0.3739  | 0.605   | 0.3178  | 0.4393  | 0.1442  | 0.1398  | 0.0866  | -0.2496 | -0.5102 | -0.1516 | -0.7661 | -0.9465 |
| PBANKA_061500 | -0.0085 | 0.5629  | -0.1197 | -0.3091 | 0.3193  | 0.0481  | -0.1988 | 0.1209  | -0.212  | -0.2248 | -0.2353 | 0.1622  |
| PBANKA_121750 | 1.1577  | -0.5598 | 0.763   | 0.3731  | 0.5108  | 0.2966  | -0.217  | -0.384  | -0.7225 | -1.3653 | -1.2869 | -1.1413 |
| PBANKA_111870 | 0.1255  | 0.1153  | 0.1231  | 0.4201  | 0.084   | 0.1881  | -0.0658 | -0.2059 | -0.2162 | -0.4259 | -0.3199 | -0.6631 |
| PBANKA_110710 | -0.4886 | 0.1288  | -0.321  | -0.3949 | -0.2897 | -0.4409 | 0.0447  | 0.1601  | 0.4448  | 0.2904  | 0.6898  | 0.3256  |
| PBANKA_141090 | 0.2121  | 0.0179  | 0.145   | 0.0975  | 0.3559  | -0.2367 | 0.0238  | -0.1364 | -0.0939 | -0.1497 | -0.3542 | -0.3722 |
| PBANKA_132970 | 0.308   | 0.0462  | 0.0435  | -0.2626 | -0.8653 | -0.7838 | 0.019   | -0.3203 | -1.1702 | -0.5296 | -0.6165 | -0.4144 |
| PBANKA_061750 | 0.1533  | -0.3394 | 0.0532  | 0.3415  | 0.047   | 0.0912  | -0.0608 | -0.4401 | -1.0673 | -1.3065 | -1.0202 | -1.0284 |
| PBANKA_091600 | 0.3434  | -0.4554 | 0.311   | 0.4137  | 0.4729  | 1.052   | 0.2591  | -0.1761 | -0.0562 | -0.2878 | 0.014   | 0.6447  |
| PBANKA_092150 | 0.036   | 0.4516  | 0.2928  | 0.1513  | 0.4009  | 0.0892  | -0.8363 | -1.0332 | -1.2886 | -1.5827 | -0.8317 | -0.1387 |
| PBANKA_122460 | -0.0074 | 0.5525  | 0.1126  | 0.5997  | 0.3211  | 0.3848  | 0.2727  | 0.6428  | -0.0155 | -0.2971 | -0.3869 | 0.1718  |
| PBANKA_121230 | 0.3739  | 0.2195  | 0.1494  | -0.3709 | -0.1632 | -0.4633 | 0.3197  | 0.1     | -0.5368 | -0.6245 | -1.0313 | 0.3907  |
| PBANKA_093300 | 0.2995  | -0.863  | 0.2963  | 0.8139  | 0.1981  | 0.555   | -0.2356 | -0.0987 | -0.2559 | -0.0373 | 0.4847  | -0.7363 |
| PBANKA_134280 | -0.592  | -0.1255 | -0.3681 | -0.3844 | -0.4474 | -0.3143 | -0.4366 | -0.0108 | 0.5576  | 0.9022  | 0.8433  | 1.1385  |
| PBANKA_103330 | -0.968  | -1.3182 | -0.8332 | -0.3844 | -0.2622 | 0.3704  | 0.6123  | 0.6373  | 0.7764  | 0.6239  | -0.9861 | -0.631  |
| PBANKA_040110 | 0.3729  | 0.7497  | 0.1893  | -0.0076 | 0.048   | -0.2128 | -0.2606 | -0.3259 | -0.1825 | 0.0137  | 0.3581  | 0.9406  |
| PBANKA_120770 | 0.4379  | 0.099   | 0.0324  | 0.1378  | 0.0248  | 0.0823  | -0.3263 | -0.743  | -0.6207 | -0.5173 | -0.4788 | 0.1482  |
| PBANKA_021230 | 0.595   | 0.3766  | -0.0719 | 0.1839  | 0.0939  | -0.0288 | 0.1513  | 0.0799  | 0.309   | 0.0079  | -0.8713 | -0.2915 |
| PBANKA_101790 | -0.4132 | 0.1608  | -0.4686 | -0.6148 | -0.2481 | -0.5458 | -0.8136 | -0.456  | -0.8555 | -0.1903 | 0.4505  | -0.009  |
| PBANKA_102800 | 0.1708  | 0.5827  | -0.0609 | 0.2592  | -0.0762 | -0.0005 | -0.0675 | 0.1674  | 0.3201  | 0.4261  | 0.4221  | 0.3501  |
| PBANKA_030530 | 0.4414  | 0.2694  | 0.1258  | -0.0525 | -0.4321 | -0.5162 | -0.4273 | -0.1738 | 0.3091  | 0.4722  | 1.0727  | 1.2506  |
| PBANKA_030070 | -0.1274 | 0.6652  | 0.2348  | 0.1089  | -0.1309 | -0.4731 | 0.1634  | 0.032   | 0.2642  | 0.4019  | 0.5777  | 0.1973  |
| PBANKA_122820 | 0.3362  | 0.6757  | 0.0585  | 0.1655  | 0.2524  | -0.2225 | 0.1095  | -0.2824 | -0.2144 | -0.2002 | 0.0268  | -0.1946 |
| PBANKA_090710 | -0.1834 | 0.0422  | 0.1611  | 0.0614  | 0.0878  | -0.2876 | 0.0175  | 0.1967  | 0.3572  | 0.4279  | 0.7429  | 1.1849  |
| PBANKA_091120 | -0.3856 | -0.6175 | -0.4409 | -0.2091 | -0.102  | 0.3887  | 0.8088  | 0.1156  | -0.0989 | -0.3118 | -0.669  | -0.8463 |
| PBANKA_094030 | 0.4655  | 0.3114  | -0.0537 | 0.2065  | 0.0011  | 0.1835  | -0.0294 | -0.1016 | -0.1916 | -0.0279 | 1.4647  | -0.3146 |
| PBANKA_141270 | 0.1896  | 0.2951  | 0.2674  | 0.8833  | 0.1374  | -0.0395 | 0.1797  | 0.2554  | -0.1023 | -0.2673 | -0.453  | -0.4076 |
| PBANKA_020980 | 0.2573  | 0.4995  | 0.386   | -0.0646 | 0.2576  | 0.032   | 0.1637  | 0.234   | 0.1343  | -0.1761 | -0.3785 | 0.2777  |
| PBANKA_133090 | -0.1613 | 0.134   | 0.1029  | 0.0167  | -0.0128 | 0.1448  | -0.2759 | 0.068   | 0.4032  | 1.0303  | 0.4369  | 0.8194  |
| PBANKA_135260 | 0.1616  | 0.2224  | 0.1713  | 0.4993  | 0.1998  | 0.477   | -0.0602 | 0.1136  | 0.2087  | 0.3029  | -0.2745 | 0.3454  |
| PBANKA_071070 | 0.5684  | 0.3492  | 0.1782  | 0.4502  | 0.3294  | 0.4632  | 0.0282  | -0.2783 | 0.0332  | -0.2994 | -0.338  | -0.0653 |
| PBANKA_130940 | -0.0014 | 0.1779  | -0.0972 | 0.1579  | -0.3574 | -0.0041 | 0.0204  | -0.1276 | 0.0604  | 0.3449  | 1.0623  | 1.3755  |
| PBANKA_061300 | 0.3808  | -0.1666 | 0.379   | 0.3117  | 0.1709  | 0.1203  | -0.0586 | 0.3198  | 0.0603  | 0.3128  | -0.1038 | -0.5382 |
| PBANKA_010480 | 0.368   | -0.0192 | -0.3454 | -0.2723 | -0.4653 | -1.0126 | -0.035  | 0.1277  | 0.624   | 0.9981  | 1.0488  | 1.1382  |
| PBANKA_082170 | 0.7766  | 0.5483  | 0.0682  | 0.1669  | -0.0121 | 0.2933  | -0.138  | -0.3197 | -0.5613 | -0.7502 | -0.2601 | -0.4935 |
| PBANKA_130020 | 0.8729  | 0.2904  | 0.6709  | 0.2217  | -0.1694 | 0.5206  | 0.0189  | -0.5045 | -0.6076 | -0.8328 | -0.2805 | 0.4069  |
| PBANKA_136540 | 0.1346  | 0.7052  | 0.0917  | -0.4546 | 0.167   | 0.1546  | 0.1734  | 0.0158  | 0.0569  | -0.5329 | -0.5345 | -0.5991 |
| PBANKA_144670 | 0.3005  | -0.093  | -0.0048 | 0.6911  | 0.0218  | 0.4062  | 0.0699  | -0.5921 | -0.0463 | -0.5862 | -0.6597 | -0.6173 |
| PBANKA_111350 | -0.0327 | 0.3191  | -0.0279 | -0.0392 | 0.1888  | 0.1876  | 0.3156  | -0.014  | -0.3011 | -0.6265 | -0.5485 | -0.8088 |
| PBANKA_090220 | -0.0254 | 0.7596  | 0.0631  | 0.1861  | -0.1829 | 0.2835  | 0.2103  | 0.1408  | 0.2034  | 0.0407  | -0.5271 | 0.6798  |
| PBANKA_080310 | -0.4228 | -0.4444 | 0.0675  | 0.0925  | 0.6402  | 0.5352  | 0.3383  | 0.1783  | -0.0376 | -0.08   | -0.5547 | -0.7691 |
| PBANKA_070090 | -0.0006 | -0.3286 | -0.0632 | -0.233  | 0.0688  | -0.0867 | 0.1988  | 0.3475  | 0.2911  | 0.3757  | 0.4429  | 0.1444  |
| PBANKA_061980 | 0.6346  | -0.0347 | 0.4852  | 0.2829  | 0.0887  | -0.591  | -0.2686 | -0.0476 | -0.2843 | -0.5005 | 0.9258  | 0.3511  |
| PBANKA_112000 | 0.5832  | 1.0731  | 0.1052  | 0.2903  | -0.0789 | 0.0785  | -0.0612 | -0.127  | 0.0615  | 0.2267  | 0.0008  | -0.0741 |
| PBANKA_061910 | 0.1276  | 0.1774  | 0.3682  | 0.484   | 0.3349  | 0.2379  | -0.3185 | -0.747  | -0.6803 | -1.5154 | -0.8789 | -0.3837 |
| PBANKA_110650 | -0.3921 | 0.4967  | -0.5072 | -0.7181 | -0.1682 | -0.0832 | 0.1056  | 0.4432  | 0.3236  | 0.3772  | 0.6017  | 0.5411  |
| PBANKA_144390 | -0.7936 | -1.3216 | -0.5415 | -0.0684 | -0.1879 | 0.1762  | 0.2467  | 0.557   | 0.8379  | 0.8613  | 0.21    | 0.0006  |
| PBANKA_100550 | -0.4034 | 0.2056  | 0.0618  | -0.4944 | 0.0374  | 0.5145  | 0.2715  | 0.2456  | -0.2872 | -0.2333 | 0.0903  | -0.2015 |
| PBANKA_133700 | -0.1472 | 0.0929  | -0.2344 | -0.4326 | -0.6983 | -0.2321 | -0.461  | 0.1636  | 0.6709  | 0.748   | 1.1962  | 1.1016  |
| PBANKA_020570 | 0.304   | 0.6844  | 0.2182  | 0.7352  | 0.289   | 0.4855  | -0.294  | -0.4224 | -1.3168 | -2.0362 | -0.6972 | -1.1591 |
| PBANKA_092760 | -0.1435 | -0.1365 | -0.2277 | -0.7369 | -0.1977 | 0.432   | -0.3803 | 0.3165  | 0.7403  | 0.9342  | 0.8859  | 1.8531  |
| PBANKA_140250 | -0.4933 | -0.839  | -0.4523 | -0.4507 | -0.047  | -0.3434 | -0.0402 | 0.1927  | 0.1329  | 0.086   | -0.0042 | -0.2003 |
| PBANKA_124220 | 0.8803  | 0.2677  | -0.1151 | 0.0829  | -0.01   | 0.0635  | -0.6646 | -0.593  | -0.2114 | 0.13    | 0.5679  | 0.9029  |
| PBANKA_052070 | -0.0608 | 0.3822  | 0.1043  | 0.1902  | 0.2547  | 0.1199  | -0.1083 | -0.0012 | 0.5372  | 0.4874  | -0.2161 | -0.0838 |
| PBANKA_141640 | 0.0404  | -0.5824 | -0.0858 | -0.0325 | 0.2117  | -0.982  | -0.3031 | -0.3321 | 0.1116  | 0.0574  | 0.6792  | 1.087   |
| PBANKA_102420 | -0.4535 | -0.9412 | -0.4257 | -0.4153 | -0.1434 | 0.0092  | 0.3004  | 0.7889  | 0.6833  | 0.5482  | -0.1786 | -0.5953 |
| PBANKA_143220 | -1.6549 | -0.4807 | -1.3743 | -1.0358 | -1.26   | -1.3572 | -0.8383 | -0.0136 | 1.2358  | 1.5484  | 1.5139  | 1.6953  |
| PBANKA_071340 | 0.2123  | 0.159   | 0.3119  | 0.2804  | 0.3448  | 0.2707  | 0.2502  | -0.0701 | -0.0746 | -0.5741 | -0.357  | 0.0237  |
| PBANKA_040550 | 0.6787  | -0.1635 | 0.281   | 0.3316  | 0.2425  | -0.0632 | -0.4394 | -0.7431 | -0.6389 | -0.5574 | -0.4701 | -0.1087 |
| PBANKA_102660 | 0.2541  | 0.6029  | 0.1865  | 0.5017  | 0.2284  | -0.2544 | -0.1241 | -0.3883 | -0.2396 | -0.3312 | -1.017  | -0.0859 |

|               |         |         |         |         |         |         |         |         |         |         |         |         |
|---------------|---------|---------|---------|---------|---------|---------|---------|---------|---------|---------|---------|---------|
| PBANKA_082150 | -0.0329 | -0.0766 | 0.2148  | 0.2378  | 0.4569  | 0.2941  | 0.2387  | -0.0908 | -0.1349 | -0.3314 | -0.7465 | -1.094  |
| PBANKA_061680 | 0.4197  | 0.5246  | -0.1133 | -0.0784 | 0.1121  | 0.4198  | -0.1564 | -0.0929 | -0.2242 | -0.501  | -0.3635 | -0.9342 |
| PBANKA_104010 | 0.2205  | 0.3255  | 0.0977  | 0.1996  | -0.1241 | 0.7787  | -0.0082 | -0.2664 | -0.0734 | 0.074   | 0.4227  | 0.4317  |
| PBANKA_120710 | -0.3512 | -0.2604 | -0.4837 | -0.501  | -0.1291 | -0.1251 | -0.5309 | 0.066   | 0.6101  | 0.8969  | 1.5947  | 1.7858  |
| PBANKA_135590 | 0.403   | -0.2105 | -0.0907 | -0.277  | 0.1779  | -0.2869 | -0.231  | -0.1352 | -0.572  | -0.5014 | 0.3166  | -0.2407 |
| PBANKA_131180 | 0.4137  | 0.2835  | 0.0095  | -0.2199 | -0.1839 | 0.2211  | -0.1505 | -0.1927 | 0.1656  | 0.3826  | 0.2445  | 1.1944  |
| PBANKA_061420 | -0.3781 | -0.1006 | 0.226   | 0.2908  | 0.4243  | 0.6705  | 0.1454  | 0.1125  | -0.3152 | -0.5593 | -0.6922 | -0.6398 |
| PBANKA_091670 | -0.1479 | -0.7624 | 0.0279  | -0.0366 | -0.403  | -0.8445 | 0.3026  | -0.2602 | 0.5518  | 0.5037  | 0.9391  | 0.9809  |
| PBANKA_112120 | -0.0814 | -0.598  | 0.4518  | -0.3845 | #####   | -0.0865 | -0.2581 | -0.2788 | -0.2801 | -0.4742 | -0.9559 | 0.0955  |
| PBANKA_143900 | -0.8601 | -0.51   | -0.4659 | -0.5639 | -0.0933 | 0.0906  | 0.3755  | 0.1774  | 0.2379  | 0.7521  | 0.3086  | -0.3707 |
| PBANKA_142960 | 0.17    | 1.0825  | 0.1631  | 0.0891  | 0.2942  | 0.1945  | -0.0445 | 0.0598  | -0.2104 | -0.2286 | 0.0939  | -0.654  |
| PBANKA_072010 | -0.1713 | -0.5402 | -0.3308 | -0.1578 | -0.1872 | -0.4099 | -1.1971 | 0.4701  | 0.3537  | 0.6215  | 0.3171  | 0.4298  |
| PBANKA_143930 | -0.3447 | 0.3652  | -0.0406 | -0.0097 | 0.089   | 0.1807  | -0.0159 | 0.1747  | 0.0545  | -0.0066 | 0.6459  | 1.1512  |
| PBANKA_030340 | -0.6326 | -0.4006 | -0.0872 | -0.0199 | -0.4959 | 0.4993  | 0.6175  | 0.3038  | 0.2747  | -0.22   | -0.9371 | -1.0209 |
| PBANKA_111300 | 0.6501  | 1.3084  | 0.7917  | 0.5745  | 0.5777  | 0.0021  | -0.8014 | -1.1758 | -1.6167 | -1.9592 | -1.0707 | -1.2395 |
| PBANKA_130230 | -0.4051 | 0.4157  | -0.036  | -0.1652 | 0.0229  | -0.1388 | 0.0472  | 0.265   | 0.3416  | 0.3566  | -0.0187 | -0.073  |
| PBANKA_111970 | 0.1908  | 0.3033  | 0.443   | 0.6659  | 0.233   | 0.3242  | 0.2145  | -0.7564 | 0.0112  | 0.0718  | -0.062  | 0.3078  |
| PBANKA_136470 | 0.6974  | 0.0627  | 0.3988  | 0.1939  | 0.1918  | 0.2934  | -0.0352 | 0.0828  | 0.0418  | 0.0023  | -0.0619 | -0.3525 |
| PBANKA_031300 | 0.8066  | -0.437  | 0.3608  | 0.3425  | 0.3475  | 0.5225  | 0.1459  | 0.0447  | -0.0539 | -0.3884 | -0.4097 | -0.3845 |
| PBANKA_092270 | -0.8232 | -0.2883 | -0.2942 | -0.0981 | 0.2598  | 0.2082  | 0.4257  | 0.2584  | 0.272   | -0.0857 | -0.0978 | -0.24   |
| PBANKA_130480 | -0.8099 | -0.4458 | -0.5585 | -0.4684 | -0.1748 | 0.1781  | 0.2522  | 0.1846  | 0.1186  | 0.1311  | -0.0811 | -0.1801 |
| PBANKA_144790 | 0.0356  | 1.745   | 0.0024  | 0.2519  | 0.2867  | -0.1364 | 0.2101  | -0.0503 | 0.3192  | 0.16    | -0.3089 | -0.2356 |
| PBANKA_123300 | -1.0331 | -1.1826 | -0.5891 | -0.1433 | -0.0678 | 0.48    | 0.5117  | 0.6838  | 0.6997  | 0.1021  | -0.4765 | -0.6027 |
| PBANKA_114170 | -0.0826 | -0.4871 | 0.2106  | 0.3731  | 0.416   | 0.5753  | 0.2807  | -0.0491 | 0.1267  | -0.3924 | -0.8795 | -1.183  |
| PBANKA_143050 | 0.3114  | -0.6607 | -0.1267 | 0.3343  | 0.2605  | 0.5417  | -0.3805 | -0.3917 | -0.5776 | -0.9584 | -0.8373 | -0.9216 |
| PBANKA_136130 | 0.1445  | 0.0089  | -0.2646 | 0.1317  | 0.3766  | 0.3375  | -0.0664 | -0.1506 | -0.3795 | -0.4528 | -0.6316 | -0.465  |
| PBANKA_134640 | -1.3531 | -0.5986 | -1.6376 | -0.9747 | -0.7268 | -0.3065 | 0.2067  | 0.8371  | 1.2746  | 1.2927  | 0.4785  | 0.1112  |
| PBANKA_030930 | -0.1084 | 0.0918  | 0.293   | 0.1616  | -0.5071 | 0.2738  | -0.2969 | -0.3166 | -0.0298 | -0.0753 | -0.5235 | -0.2997 |
| PBANKA_050320 | 0.6298  | 0.7762  | 0.1836  | 0.1817  | 0.0824  | 0.5354  | -0.1933 | -0.1238 | -0.0321 | -0.0216 | -0.2259 | -0.1871 |
| PBANKA_131240 | 0.2447  | 0.4742  | 0.3212  | -0.0372 | 0.0384  | 0.3704  | -0.0728 | 0.0331  | 0.0738  | -0.1202 | 0.0176  | -0.0648 |
| PBANKA_141350 | 0.4574  | -0.17   | 0.1639  | 0.3213  | 0.2217  | 0.6576  | -0.0841 | -0.1597 | 0.2724  | 0.0515  | 0.3147  | -0.4028 |
| PBANKA_040720 | 0.1036  | -0.3909 | 0.1793  | 0.2296  | 0.5356  | -1.0578 | -0.037  | 0.0259  | -0.113  | -0.3462 | 0.1424  | -1.0218 |
| PBANKA_113690 | -0.1117 | -0.4396 | -0.5604 | -0.4162 | -0.1493 | -0.1534 | -0.1209 | 0.405   | -0.0488 | 0.4687  | 0.333   | 0.9196  |
| PBANKA_031620 | 0.2054  | 1.0359  | 0.0319  | -0.6331 | -0.2817 | -0.9366 | -1.2985 | -0.816  | -0.2662 | 0.659   | 0.7555  | 0.942   |
| PBANKA_092620 | -0.5026 | -0.0277 | 0.1647  | 0.9153  | 0.4704  | 0.8705  | -0.0796 | -0.0866 | -0.5697 | -0.7179 | -0.6768 | -0.717  |
| PBANKA_120080 | -0.1663 | -0.0241 | 0.0282  | -0.0451 | -0.0212 | -0.0567 | -0.2401 | -0.4502 | -0.38   | -0.213  | 0.2864  | 0.8738  |
| PBANKA_031070 | 0.7806  | 1.1561  | 0.5954  | 0.4909  | -0.5484 | 0.4524  | -0.9038 | -0.3156 | -0.8723 | -0.4302 | 0.1924  | 0.087   |
| PBANKA_143190 | -0.095  | 0.2764  | 0.1959  | 0.6473  | 0.4011  | 0.4565  | -0.0005 | -0.3647 | -0.6351 | -0.6244 | -0.5114 | -0.3553 |
| PBANKA_145510 | -0.9304 | -0.2931 | -0.5064 | 0.0992  | 0.1012  | 0.0838  | 0.1138  | -0.5587 | -0.2082 | -0.2974 | -0.0278 | -0.1504 |
| PBANKA_113020 | -0.5927 | -0.3201 | -0.1797 | 0.044   | -0.0197 | 0.5389  | 0.4061  | 0.4346  | 0.4013  | -0.1655 | -0.8799 | -0.2996 |
| PBANKA_094290 | 0.2639  | -0.0432 | 0.2064  | -0.026  | 0.2711  | -0.0844 | -0.0953 | -0.3707 | -0.3256 | -0.4694 | 0.4753  | 1.013   |
| PBANKA_103160 | 0.0078  | 0.3913  | 0.0279  | -0.0591 | -0.127  | 0.1539  | -0.2229 | -0.1988 | 0.0208  | 0.3326  | 0.3719  | 0.5089  |
| PBANKA_092850 | 0.2951  | 0.7777  | 0.3423  | -0.1615 | -0.3707 | 0.8609  | 0.0364  | 0.2312  | 0.1955  | 0.5119  | 0.7573  | 0.5064  |
| PBANKA_143680 | -0.2224 | -0.3845 | 0.0369  | 0.1515  | 0.4794  | 0.6605  | 0.1625  | -0.0261 | -0.1836 | -0.4192 | -0.7516 | -0.4413 |
| PBANKA_140070 | -0.3031 | 0.2858  | -0.2466 | 0.2618  | 0.0611  | 0.4703  | 0.4042  | 0.3793  | 0.1168  | -0.35   | -0.8716 | 0.366   |
| PBANKA_121820 | -0.003  | 0.5141  | 0.2435  | 0.1291  | 0.0874  | 0.2371  | -0.359  | -1.2439 | -1.4794 | -1.4169 | -1.9184 | -0.9897 |
| PBANKA_093630 | 0.2742  | 0.3808  | 0.0188  | 0.0766  | 0.192   | -0.1495 | 0.0828  | -0.0559 | 0.2038  | 0.132   | 0.3995  | 1.0567  |
| PBANKA_072170 | -0.0483 | -0.2861 | 0.3484  | 0.4349  | 0.6397  | 0.6958  | 0.2355  | 0.0515  | -0.4085 | -1.5347 | -2.1663 | -3.2159 |
| PBANKA_083570 | -0.3082 | 0.0495  | 0.084   | 0.0078  | 0.0407  | 0.1606  | -0.0654 | 0.1348  | 0.2664  | 0.0314  | -0.0281 | -0.0914 |
| PBANKA_050470 | 0.0752  | 0.4545  | 0.1125  | 0.4304  | 0.3562  | 0.6465  | 0.1604  | 0.059   | 0.278   | -0.1292 | -0.5995 | -0.9137 |
| PBANKA_091070 | -0.5054 | -0.4704 | -0.4017 | -0.1126 | -0.1032 | 0.2971  | 0.0696  | 0.4438  | 0.7583  | 1.0892  | 0.611   | -0.1546 |
| PBANKA_094280 | 0.3569  | -0.0762 | 0.2743  | 0.1255  | 0.0465  | -0.1579 | -0.2325 | -0.3046 | -0.3221 | -0.4596 | -0.1297 | 0.2792  |
| PBANKA_101330 | -0.059  | 0.141   | -0.0174 | -0.09   | -0.0258 | -0.1986 | 0.1338  | 0.5544  | -0.1145 | -0.0342 | 0.044   | 0.0393  |
| PBANKA_020760 | -0.3342 | -0.0631 | 0.0768  | -0.0881 | 0.0373  | -0.2905 | 0.1977  | 0.5613  | 0.3543  | 0.2332  | 0.1915  | 0.0472  |
| PBANKA_020860 | 0.4158  | -0.16   | 0.3217  | 0.1546  | 0.0781  | 0.258   | -0.1494 | -0.6168 | -0.9259 | -1.1452 | -1.0287 | -1.3595 |
| PBANKA_113450 | 0.2397  | 0.4315  | 0.1951  | 0.2777  | -0.0081 | 0.3157  | -0.0797 | -0.1622 | 0.0524  | 0.0974  | 0.1079  | 0.6465  |
| PBANKA_130180 | -0.017  | -0.0232 | -0.1292 | -0.1495 | -0.3374 | -0.0452 | 0.3026  | 0.4592  | 0.7195  | 0.6277  | 0.5889  | 0.7524  |
| PBANKA_121270 | -0.0423 | 0.6417  | -0.0684 | -0.1034 | 0.0104  | -0.0125 | 0.179   | -0.0333 | 0.2915  | 0.206   | -0.199  | -0.2459 |
| PBANKA_050580 | -0.1979 | 0.0029  | -0.203  | -0.1384 | -0.0836 | 0.083   | -0.0272 | -0.3291 | -0.1615 | -0.0278 | 0.4625  | 0.4832  |
| PBANKA_093260 | -0.8069 | -0.5836 | -0.7645 | -0.0508 | -0.6083 | -0.2709 | -0.5434 | -0.54   | 0.0381  | -0.1126 | 0.0433  | 1.2673  |
| PBANKA_120760 | 0.2215  | 1.1595  | -0.014  | 0.1784  | -0.1499 | 0.1691  | 0.1548  | -0.2007 | 0.0257  | -0.4656 | -0.2998 | 0.0456  |
| PBANKA_143820 | 0.1874  | 0.0365  | 0.1304  | 0.3941  | 0.2315  | 0.5975  | 0.1787  | 0.4559  | 0.4592  | 0.1914  | -0.4677 | -0.6869 |
| PBANKA_143310 | 0.0259  | -0.1785 | -0.0616 | -0.2671 | -0.0658 | 0.2537  | 0.0661  | 0.0301  | 0.0941  | -0.1077 | 0.2883  | 0.4189  |

|               |         |         |         |         |         |         |         |         |         |         |         |         |
|---------------|---------|---------|---------|---------|---------|---------|---------|---------|---------|---------|---------|---------|
| PBANKA_135500 | -0.2133 | 0.8962  | -0.093  | -0.2358 | -0.1276 | -0.2654 | 0.0448  | -0.0842 | -0.5427 | -0.3282 | -0.4836 | -0.5008 |
| PBANKA_040100 | 0.1951  | 0.7543  | 0.6861  | -0.2167 | 0.063   | 0.1496  | -0.7839 | -0.0514 | -0.3455 | -0.0372 | 0.2236  | 0.928   |
| PBANKA_134710 | 0.4483  | -0.1307 | 0.3262  | 0.2618  | 0.1776  | 0.1033  | 0.0834  | -0.599  | -0.7741 | -0.9526 | -1.5264 | -1.1899 |
| PBANKA_100300 | 0.306   | -0.3276 | 0.1224  | 0.4575  | 0.0775  | 0.419   | 0.0098  | 0.0731  | -0.2899 | -0.1645 | -0.4987 | -0.2017 |
| PBANKA_130370 | 0.1399  | 0.1937  | 0.1368  | -0.0428 | 0.2389  | -0.006  | -0.1932 | 0.0237  | -0.5154 | -0.4497 | -0.3062 | -0.3911 |
| PBANKA_110470 | 0.5848  | 0.243   | 0.3475  | -0.0993 | 0.2408  | -0.3631 | 0.1103  | -0.2806 | -0.1167 | 0.0372  | -0.0837 | -0.0355 |
| PBANKA_124510 | 0.3597  | -0.0192 | 0.2359  | -0.1275 | 0.0926  | 0.1163  | -0.2602 | -0.1175 | -0.6467 | -0.3225 | -0.114  | 0.2434  |
| PBANKA_062320 | 0.2062  | -0.4539 | -0.3719 | -0.8877 | -0.181  | -1.0669 | -0.7033 | -0.7452 | 0.0812  | 0.3594  | 0.8649  | 1.7253  |
| PBANKA_094320 | 0.0513  | 0.4926  | 0.1726  | 0.5365  | 0.1435  | 0.4767  | -0.009  | -0.4166 | -0.3601 | -0.5891 | -0.2103 | -0.5513 |
| PBANKA_040160 | 0.2394  | 0.8282  | 0.2975  | 0.356   | 0.2482  | 0.2087  | -0.2677 | -0.555  | -0.2444 | -0.2343 | 0.1997  | -0.0675 |
| PBANKA_113870 | 0.2135  | 0.7251  | 0.2292  | 0.1656  | 0.4799  | 0.3255  | -0.0797 | 0.0523  | -0.4842 | -0.3122 | -0.0933 | -0.5683 |
| PBANKA_061630 | 0.0133  | 0.1214  | 0.1655  | 0.6731  | 0.2786  | 0.8033  | 0.3091  | 0.0085  | 0.3554  | -0.1677 | -0.6048 | -0.4103 |
| PBANKA_081600 | -0.0829 | 0.1682  | 0.4545  | 0.3382  | 0.1139  | 0.4694  | 0.0837  | 0.3153  | 0.1933  | 0.0131  | 0.0761  | -0.1012 |
| PBANKA_071960 | -0.1333 | 0.1729  | 0.4548  | 0.0851  | 0.296   | 0.3001  | -0.2313 | -0.2608 | -0.4263 | -0.7128 | -0.4542 | -0.2021 |
| PBANKA_061890 | -0.6048 | 0.0029  | 0.1464  | 0.2139  | 0.503   | 0.4223  | 0.1134  | -0.3478 | -0.5836 | -1.1371 | -1.2584 | -1.5664 |
| PBANKA_130130 | -0.4465 | -0.001  | -0.0746 | -0.3576 | 0.5902  | -0.1917 | -0.6888 | -0.3273 | -1.0357 | -0.1723 | 0.1563  | -0.3321 |
| PBANKA_060380 | 0.0414  | 0.8324  | 0.5213  | 0.5744  | 0.256   | 0.4311  | -0.0329 | -0.2865 | -0.17   | -0.4067 | -0.7328 | -0.5892 |
| PBANKA_070800 | 0.2813  | 0.9143  | -0.1283 | 0.2367  | 0.2671  | 0.1368  | -0.2042 | -0.2071 | -0.2632 | -0.3861 | -0.4252 | -0.1558 |
| PBANKA_081540 | -1.0729 | -0.437  | -1.1061 | -0.5705 | -0.4874 | -0.1536 | 0.2245  | 0.7958  | 0.8363  | 1.1733  | 0.9428  | 0.8661  |
| PBANKA_061040 | 0.7694  | 0.6556  | 0.5012  | -0.5513 | -0.0998 | -0.0994 | -0.7772 | -0.5562 | -1.2698 | -0.5615 | 0.7634  | 0.8735  |
| PBANKA_131810 | 0.0707  | 0.5061  | 0.3686  | -0.149  | -0.1827 | -0.2643 | -0.3214 | -0.5668 | -1.2507 | -0.9421 | -0.394  | -0.5002 |
| PBANKA_110590 | 0.2957  | -0.026  | 0.1253  | 0.4989  | 0.1555  | -0.0965 | 0.2566  | 0.2181  | 0.0316  | -0.1443 | 0.4383  | -0.3478 |
| PBANKA_093980 | -0.1034 | 0.1261  | -0.0636 | 0.1218  | 0.2415  | 0.1158  | -0.4244 | -0.4225 | 0.0096  | -0.5577 | -0.7395 | -0.7478 |
| PBANKA_090700 | 0.4498  | 0.4245  | 0.0775  | -0.0083 | 0.1825  | 0.7322  | -0.1504 | -0.5229 | 0.157   | -0.4397 | 0.2741  | -0.079  |
| PBANKA_041750 | 0.1431  | -0.4468 | 0.3253  | 0.5883  | 0.4978  | 0.132   | -0.6113 | -0.7883 | -0.5979 | -1.297  | -0.6649 | -0.3877 |
| PBANKA_131460 | 0.1483  | 0.1416  | 0.0435  | -0.0364 | 0.2325  | -0.5716 | 0.1514  | -0.282  | -0.7892 | -1.056  | -1.2781 | -1.0223 |
| PBANKA_112630 | -0.3201 | -0.1692 | 0.1263  | 0.4062  | -0.1567 | 0.4579  | 0.5313  | -0.2715 | 0.0754  | 0.3246  | 0.4916  | 0.2849  |
| PBANKA_030510 | -1.7105 | -0.7183 | -1.5568 | -0.9334 | -0.644  | -0.0031 | 0.8923  | 0.9018  | 0.9172  | 1.4184  | 0.0295  | -1.0127 |
| PBANKA_051450 | 0.0672  | 0.3055  | 0.3209  | 0.4095  | 0.3511  | 0.4298  | -0.0379 | -0.3143 | -0.4005 | -0.6811 | -0.9643 | -0.7384 |
| PBANKA_080090 | 0.3188  | -0.1517 | 0.3505  | 0.3827  | 0.3807  | 0.6318  | 0.093   | -0.208  | -0.0506 | -0.1786 | 0.073   | -0.1836 |
| PBANKA_060160 | -0.0597 | 0.3773  | -0.0353 | 0.1737  | 0.1528  | -0.2931 | 0.0277  | 0.0077  | -0.0583 | 0.0738  | -0.3593 | -0.4553 |
| PBANKA_120260 | 0.0699  | 0.3957  | -0.038  | -0.5929 | -0.4254 | -0.1064 | -0.0938 | 0.0702  | 0.1521  | 0.4055  | 0.8132  | 1.0346  |
| PBANKA_010680 | 0.0399  | 0.3286  | 0.1096  | 0.2291  | 0.153   | 0.0988  | 0.014   | -0.1068 | -0.0943 | -0.307  | -0.1522 | -0.1055 |
| PBANKA_092140 | -0.4093 | -0.2488 | -0.265  | 0.0864  | 0.3085  | 0.1121  | 0.0055  | 0.2728  | 0.6091  | 0.4239  | 0.9248  | 1.3331  |
| PBANKA_131620 | -0.2278 | 0.2025  | 0.183   | -0.0626 | -0.0989 | -0.1093 | -0.336  | 0.1964  | -0.3324 | -0.2551 | 0.0077  | -0.6775 |
| PBANKA_141750 | 0.3371  | 0.5336  | 0.7114  | -0.1651 | 0.1978  | 0.5419  | 0.0434  | -0.2687 | -0.1932 | -0.4217 | -0.4617 | -0.2753 |
| PBANKA_020680 | -0.1791 | 0.2632  | 0.0756  | 0.4562  | 0.1668  | 0.0676  | -0.0651 | 0.1404  | 0.0893  | 0.026   | 0.3268  | 0.4782  |
| PBANKA_031590 | -0.3887 | 0.3264  | 0.0846  | 0.2138  | 0.2062  | 0.2163  | -0.0263 | -0.349  | -0.1936 | -1.0099 | -0.7554 | -0.7812 |
| PBANKA_021300 | -0.1437 | 0.375   | 0.3356  | 0.1769  | 0.1247  | -0.1403 | 0.0178  | 0.2032  | -0.1166 | -0.2299 | -0.1087 | -0.0025 |
| PBANKA_132310 | 0.4625  | 0.4005  | 0.2369  | -0.0207 | -0.577  | -0.2487 | 0.0247  | -0.3879 | -0.4591 | -0.2732 | -0.0319 | 0.0224  |
| PBANKA_123740 | -0.0863 | 0.0171  | 0.06    | 0.168   | 0.3013  | 0.7417  | 0.0563  | -0.4733 | -0.5752 | -0.7933 | -0.9082 | -0.6331 |
| PBANKA_132230 | 0.331   | 0.2138  | 0.4944  | 0.1558  | 0.1039  | 0.5726  | 0.2045  | 0.0463  | -0.053  | 0.0652  | -0.43   | -0.2806 |
| PBANKA_134490 | -0.3658 | -0.1825 | -0.2745 | 0.5242  | 0.3107  | 0.2816  | 0.4372  | 0.649   | 0.7305  | 0.7931  | -0.028  | -0.3972 |
| PBANKA_031280 | 0.4537  | 0.517   | 0.4884  | -0.0474 | 0.0061  | 0.9916  | 0.0165  | 0.0392  | 0.0137  | -0.3149 | -0.6015 | -0.2321 |
| PBANKA_092530 | -0.617  | -0.1514 | -0.301  | -0.438  | -0.1179 | -0.4064 | -0.58   | -0.0014 | 0.3422  | 0.308   | 0.7755  | 1.2206  |
| PBANKA_122230 | -0.3265 | 0.1956  | -0.1699 | 0.0823  | 0.1171  | 0.1078  | 0.0454  | -0.115  | 0.2272  | 0.1691  | -0.6543 | -0.4022 |
| PBANKA_111050 | -0.1827 | 0.0443  | 0.3996  | 0.2956  | 0.6052  | 0.0095  | -0.0209 | -0.5268 | -0.8941 | -1.4526 | -1.2306 | -1.0446 |
| PBANKA_030370 | -0.1516 | 0.0267  | -0.1041 | -0.1261 | 0.3034  | 0.2034  | -0.1797 | 0.1378  | 0.0874  | 0.1661  | -0.4635 | -0.7426 |
| PBANKA_146230 | 0.2181  | -1.9459 | -0.7108 | -0.4252 | -0.2673 | 0.0994  | -0.0052 | 0.2713  | -0.1443 | -0.336  | -0.3189 | -0.4742 |
| PBANKA_140990 | -0.2392 | 0.3289  | 0.289   | -0.2415 | -0.1664 | 0.589   | 0.1562  | 0.0139  | -0.2261 | -0.2663 | -0.3623 | -0.3581 |
| PBANKA_112270 | -0.0959 | -0.1643 | -0.6868 | -0.3446 | -0.5704 | -1.0284 | -0.8695 | -0.1257 | 0.7785  | 1.4003  | 1.2809  | 1.4712  |
| PBANKA_071940 | 0.3902  | 0.3768  | 0.2084  | 0.4939  | 0.4145  | 0.279   | -0.2312 | 0.1772  | 0.0159  | -0.1482 | -0.2743 | 0.0834  |
| PBANKA_124340 | 0.7926  | 0.8113  | 0.2616  | 0.0231  | 0.2718  | 0.0678  | -0.0928 | -0.0297 | 0.0914  | 0.4079  | 0.393   | 0.8855  |
| PBANKA_122050 | -0.1646 | -0.3432 | -0.5126 | -0.4181 | -0.0926 | -0.2437 | -0.3041 | 0.1911  | 0.2502  | 0.509   | 0.024   | 0.0604  |
| PBANKA_145970 | -0.106  | -0.3057 | -0.2753 | -0.8115 | 0.3745  | 0.0789  | -0.6321 | -0.543  | -0.4238 | -0.4578 | -0.5156 | 0.0276  |
| PBANKA_050390 | -0.6772 | -1.0161 | -0.3251 | 0.072   | 0.4083  | -0.3123 | 0.3055  | 0.7535  | 0.6141  | 0.5299  | -0.3186 | -0.2634 |
| PBANKA_132250 | 0.6761  | 0.5001  | 0.1771  | 0.5632  | 0.1648  | 0.1948  | -0.1772 | -0.3655 | 0.1713  | -0.1012 | 0.3691  | 0.437   |
| PBANKA_121030 | -0.5007 | -0.8566 | 0.0094  | 0.1325  | 0.1574  | -0.1119 | 0.1904  | 0.2528  | -0.0552 | -0.6019 | -0.6823 | -0.164  |
| PBANKA_134380 | 0.1906  | 0.2816  | 0.2686  | -0.0247 | 0.2305  | 0.2055  | -0.1586 | -0.6121 | -0.6342 | -0.6527 | -0.423  | -0.6671 |
| PBANKA_135150 | -0.5425 | -0.7465 | -0.4845 | -0.1682 | -0.3577 | -0.6995 | -0.0282 | 0.4518  | 0.0127  | 1.2879  | 1.309   | 1.3481  |
| PBANKA_051240 | 0.1129  | 0.2145  | -0.3354 | -0.4261 | -0.064  | -0.6871 | -0.549  | -0.2984 | 0.3112  | 0.9394  | 0.9905  | 0.8977  |
| PBANKA_010340 | -0.4539 | 0.3768  | 0.2117  | -0.1944 | 0.0718  | 0.1786  | -0.1181 | -0.306  | -0.5491 | -0.6052 | -0.0742 | -0.4203 |
| PBANKA_110510 | 0.0571  | -0.4085 | -0.0127 | 0.1651  | 0.2218  | 0.5652  | 0.3946  | 0.3804  | 0.3007  | 0.0914  | -0.6492 | -0.3139 |

|               |         |         |         |         |         |         |         |         |         |         |         |         |
|---------------|---------|---------|---------|---------|---------|---------|---------|---------|---------|---------|---------|---------|
| PBANKA_135320 | -0.1277 | -0.3522 | -0.0583 | 0.4821  | 0.3069  | 0.498   | 0.427   | 0.1596  | -0.0244 | -0.4239 | -1.2709 | -0.8244 |
| PBANKA_122870 | 0.0155  | 0.2584  | -0.2631 | 0.0366  | -0.3981 | -0.5046 | -0.322  | -0.2127 | 0.3006  | 0.6524  | 1.2821  | 1.4648  |
| PBANKA_134580 | 0.2599  | 0.8777  | -0.2105 | -0.2501 | -0.5148 | -0.2259 | -0.9231 | -0.6267 | -0.4238 | 0.4617  | 1.1658  | 1.6418  |
| PBANKA_061530 | 0.197   | -0.2385 | 0.0193  | 0.0348  | -0.0764 | -0.315  | 0.1607  | 0.3586  | 0.304   | 0.4788  | 0.5852  | 0.1779  |
| PBANKA_093010 | 0.0506  | -0.0155 | -0.2335 | 0.1211  | -0.1549 | 0.0879  | 0.3653  | 0.7914  | 0.6601  | 0.714   | 0.2294  | 0.1936  |
| PBANKA_093690 | -0.5273 | -0.2447 | -0.1483 | -0.0456 | 0.162   | -0.3368 | 0.0484  | 0.1229  | 0.096   | 0.1235  | 0.1379  | 0.2379  |
| PBANKA_072020 | 0.3541  | 0.0855  | 0.2563  | 0.268   | 0.2319  | -0.6799 | -0.3285 | -0.0134 | 0.0815  | 0.0108  | 0.0515  | 0.0097  |
| PBANKA_091410 | -0.3233 | -0.1374 | -0.1231 | -0.0582 | 0.0108  | 0.3352  | 0.0941  | 0.3244  | 0.339   | 0.1307  | -1.1491 | -0.0612 |
| PBANKA_082860 | -0.1565 | -0.6594 | 0.0785  | -0.0288 | 0.0719  | 0.0246  | -0.4345 | 0.0838  | -0.2234 | -0.013  | 1.0174  | -0.4622 |
| PBANKA_134030 | 0.028   | 1.0622  | 0.2041  | -0.2728 | 0.1127  | -0.5547 | -0.284  | 0.1138  | -2.4997 | -0.2842 | 0.8685  | 0.9664  |
| PBANKA_070460 | 0.2306  | 0.7105  | 0.1358  | 0.0403  | 0.1102  | -0.2129 | -0.031  | 0.2735  | -0.0864 | -0.3078 | -0.6211 | -0.1789 |
| PBANKA_031080 | 0.5665  | 0.2843  | 0.2921  | 0.2693  | 0.1089  | 0.2964  | -0.0154 | -0.0588 | -0.2475 | -0.1192 | -0.3398 | -0.3857 |
| PBANKA_123420 | 0.2809  | 0.1613  | 0.339   | 0.3368  | -0.0407 | -0.1479 | 0.2138  | -0.1871 | -0.337  | -0.7    | -0.5739 | -0.1944 |
| PBANKA_122570 | -0.2714 | -0.3888 | -0.1358 | -0.1685 | -0.2155 | -0.3319 | -0.1038 | 0.3925  | 0.0174  | 0.0328  | -0.5157 | -0.4337 |
| PBANKA_141980 | -0.5428 | -0.3849 | -0.6213 | -0.2609 | -0.1453 | -0.0205 | 0.2818  | 0.3532  | 0.6135  | 0.7716  | 0.1197  | -0.1991 |
| PBANKA_000520 | -0.555  | -0.1081 | -0.6773 | -0.2252 | 0.0189  | -0.2595 | 0.1891  | 0.1435  | 0.7671  | 0.684   | 0.5921  | 1.4136  |
| PBANKA_122040 | -0.0115 | 0.1215  | 0.0311  | 0.2643  | 0.3947  | 0.3964  | 0.2188  | -0.0115 | -0.1865 | -0.3531 | -0.2231 | 0.0341  |
| PBANKA_133780 | -0.7195 | 0.1463  | -0.443  | -0.3527 | -0.1424 | -0.2083 | 0.4299  | 0.2833  | 0.3015  | 0.1187  | -0.4982 | -0.2361 |
| PBANKA_130550 | -0.3684 | 0.0436  | -0.3839 | -0.5004 | -0.0486 | -0.3463 | -0.4865 | -0.1568 | -0.5158 | -0.0816 | 0.2944  | -0.0311 |
| PBANKA_062220 | 0.4074  | -0.309  | 0.3075  | 0.3854  | 0.0786  | -0.3285 | -0.3772 | -0.0848 | -0.3355 | -0.6725 | -0.354  | -0.5378 |
| PBANKA_132260 | -1.2928 | -0.8221 | -0.537  | -0.2695 | -0.0945 | 0.2936  | 0.1558  | 0.2224  | -0.0791 | -0.1113 | -0.5535 | -0.2214 |
| PBANKA_080180 | -0.2608 | -0.6017 | -0.17   | -0.1791 | -0.1332 | 0.0974  | 0.16    | 0.249   | 0.367   | 0.6176  | 0.3814  | 0.0441  |
| PBANKA_091960 | -0.1164 | 0.3998  | -0.1549 | -1.2918 | 0.0459  | 0.4674  | 0.2092  | -0.2731 | -0.1823 | -0.4666 | -0.6951 | -0.5158 |
| PBANKA_082210 | 0.0312  | 0.3304  | -0.1132 | 0.1934  | 0.1465  | 0.4235  | -0.121  | 0.0368  | 0.4646  | 0.2476  | 0.7178  | 0.6922  |
| PBANKA_030350 | -0.2166 | -0.6476 | -0.497  | 0.3313  | 0.1492  | 0.4098  | 0.3916  | 0.7627  | 0.432   | 0.0592  | -0.2794 | -0.056  |
| PBANKA_122340 | -0.038  | -0.9043 | -0.1541 | 0.2138  | 0.0973  | -0.211  | 0.2186  | 0.3335  | -0.2398 | -0.1166 | -0.1426 | 0.0836  |
| PBANKA_121930 | 0.2989  | 0.3612  | 0.3668  | 0.0344  | 0.4296  | -0.0348 | -0.0108 | -0.4573 | -1.3149 | -1.5274 | -1.4733 | -1.8031 |
| PBANKA_051410 | 0.2464  | 0.1797  | -0.0539 | -0.409  | -0.0237 | 0.0415  | -0.0358 | 0.1339  | -0.0621 | 0.1103  | 0.7969  | 1.0409  |
| PBANKA_135400 | -0.2378 | 0.1704  | -0.558  | -0.1786 | -0.3915 | -0.1366 | -0.1839 | -0.0721 | 0.8869  | 0.776   | 0.7743  | 0.9673  |
| PBANKA_132740 | 0.5968  | 0.336   | 0.4231  | 0.1972  | 0.3239  | 0.1548  | -0.0686 | 0.0766  | -0.4913 | -0.8583 | -0.945  | -1.4682 |
| PBANKA_143380 | 0.2122  | 0.1356  | -0.0196 | -0.0996 | -0.2295 | -0.1702 | -0.4436 | -0.4894 | -0.5914 | -0.413  | -0.726  | -0.4922 |
| PBANKA_040280 | -0.0375 | 0.5479  | -0.3681 | -0.591  | -0.716  | -0.7691 | -0.1587 | 0.3335  | 0.5521  | 1.3296  | 1.2822  | 1.1885  |
| PBANKA_093210 | -0.6351 | -0.136  | -0.027  | -0.033  | 0.0642  | 0.2756  | 0.1916  | -0.1075 | -0.4545 | -0.3848 | -0.1956 | -0.325  |
| PBANKA_143360 | -0.447  | -0.157  | -0.2758 | 0.0007  | -0.0164 | 0.0497  | -0.0203 | 0.3188  | 0.5804  | 0.6387  | 1.1831  | 1.0753  |
| PBANKA_020720 | 0.2146  | 0.1995  | 0.3958  | 0.4426  | 0.4047  | 0.0854  | 0.2792  | -0.0958 | -0.0863 | -0.5955 | -0.0621 | 0.155   |
| PBANKA_070890 | -0.0909 | 0.5171  | 0.1255  | 0.2861  | 0.1715  | 0.3039  | 0.0047  | 0.0992  | -0.211  | -0.6805 | -0.7142 | -0.5993 |
| PBANKA_080760 | 0.1341  | 0.4107  | 0.1657  | 0.0865  | -0.0316 | -0.2725 | -0.1968 | -0.7865 | -0.7111 | -1.1737 | -0.5101 | 0.2035  |
| PBANKA_112860 | -0.0723 | 0.2331  | -0.3804 | 0.0792  | 0.0952  | 0.0429  | 0.0695  | -0.5146 | -0.3963 | -0.0498 | -0.2626 | -0.4996 |
| PBANKA_083630 | -0.4351 | 0.0711  | 0.0973  | 0.1153  | 0.1846  | 0.1402  | 0.1004  | -0.3438 | -0.2992 | -0.2351 | -0.5263 | -0.6053 |
| PBANKA_103600 | 0.4471  | 0.3326  | 0.1159  | 0.0142  | -0.1621 | 0.0805  | -0.1575 | 0.0484  | -0.0615 | 0.1717  | 0.4955  | 0.6617  |
| PBANKA_120310 | 0.0391  | 0.3873  | 0.4562  | 0.6304  | 0.238   | 0.3748  | -0.1059 | -0.1427 | 0.1833  | -0.3241 | 0.1088  | -0.0167 |
| PBANKA_092080 | -0.4061 | -0.2116 | 0.0042  | 0.4173  | 0.3543  | 0.589   | 0.0425  | -0.2438 | -0.5868 | -1.028  | -1.1773 | -1.1701 |
| PBANKA_133990 | 0.2627  | 0.1493  | 0.5087  | -0.4678 | -0.0713 | -0.0014 | -0.0725 | 0.2252  | -0.6108 | -0.7066 | -0.9732 | -0.8013 |
| PBANKA_021340 | 0.1347  | 0.5527  | -0.0035 | -0.1675 | -0.0797 | -0.4436 | -0.4622 | 0.0266  | -0.1412 | 0.2713  | 0.6663  | 1.293   |
| PBANKA_123310 | -0.0567 | -0.2146 | 0.2008  | -0.1035 | 0.2689  | 0.8281  | 0.3741  | -0.1863 | -0.3915 | -0.6803 | -1.1795 | -1.3103 |
| PBANKA_110240 | 0.1833  | 0.487   | 0.359   | 0.2893  | 0.2047  | 0.623   | 0.0218  | -0.1498 | -0.2893 | -0.5117 | -0.2274 | 0.2493  |
| PBANKA_092870 | 0.0719  | 0.2731  | 0.0211  | 0.0984  | 0.0694  | -0.0788 | -0.1907 | 0.0383  | 0.0087  | 0.0863  | -0.0137 | 0.0842  |
| PBANKA_052060 | 0.5041  | 0.3174  | 0.3323  | 0.3341  | 0.3046  | 0.1919  | 0.0823  | -0.5348 | -0.5244 | -1.1197 | -0.8815 | -0.5306 |
| PBANKA_103620 | -0.2731 | 0.0084  | 0.1855  | 0.1661  | 0.2607  | -0.2813 | 0.2318  | -0.176  | -0.253  | -0.633  | -0.3349 | -0.052  |
| PBANKA_040630 | -0.3236 | 0.2439  | -0.035  | 0.0404  | -0.3236 | 0.2061  | 0.0028  | 0.0679  | -0.1114 | -0.0106 | -0.0933 | 0.0741  |
| PBANKA_142060 | -1.407  | -0.9847 | -1.2519 | -0.5799 | -0.5901 | -0.0442 | 0.7546  | 0.9467  | 1.1289  | 0.9304  | -0.1743 | -0.7667 |
| PBANKA_145100 | -0.0143 | -0.533  | 0.1191  | -0.1486 | 0.2647  | 0.982   | 0.3024  | 0.2592  | -0.1463 | -0.0463 | -0.6163 | -0.3146 |
| PBANKA_041430 | -1.0639 | -1.1471 | -0.9648 | -0.4208 | -0.2911 | 0.4518  | 0.7753  | 0.9509  | 1.0753  | 0.9044  | 0.1508  | -0.0748 |
| PBANKA_123130 | -0.2422 | -0.8985 | -0.3067 | -0.409  | -0.5952 | 0.2018  | 0.1721  | 0.4306  | 0.0993  | 0.252   | 0.7844  | 0.0456  |
| PBANKA_120610 | 0.6056  | 0.5012  | 0.2238  | 0.4295  | 0.5165  | -0.1457 | 0.1989  | -0.2295 | -0.0044 | -0.5992 | -0.4073 | 0.7793  |
| PBANKA_134450 | -0.2031 | 0.221   | -0.4716 | -0.2914 | -0.4136 | -0.6343 | -0.3962 | -0.3726 | 0.2823  | 0.7369  | 1.2233  | 1.444   |
| PBANKA_113770 | -0.6658 | -0.4285 | -0.5246 | 0.0914  | 0.144   | 0.1344  | 0.174   | 0.0936  | 0.2141  | 0.1423  | -0.4464 | -0.4712 |
| PBANKA_062200 | -0.507  | -0.035  | -0.4092 | -0.1297 | -0.246  | -0.4495 | 0.1873  | 0.3812  | 0.7614  | 0.8706  | 0.4153  | 0.759   |
| PBANKA_143620 | -0.1128 | -0.1185 | -0.1649 | 0.2008  | 0.124   | 0.0473  | 0.3439  | 0.622   | 0.4362  | 0.5536  | 0.2333  | -0.3936 |
| PBANKA_052460 | 0.1874  | -0.2692 | -0.3147 | 0.2236  | 0.0675  | -0.2771 | 0.1193  | 0.0125  | 0.3789  | 0.742   | -0.0579 | -0.0114 |
| PBANKA_101500 | 0.1585  | -0.0478 | 0.0847  | 0.1481  | 0.2579  | 0.4333  | 0.3076  | -0.0617 | -0.3889 | -0.6647 | -0.4762 | -1.4947 |
| PBANKA_010730 | 0.1973  | 0.2344  | 0.3846  | 0.4998  | 0.5398  | 0.472   | -0.1673 | -0.4916 | -0.9596 | -1.2813 | -1.6257 | -1.2175 |
| PBANKA_040980 | -0.0282 | 0.7969  | 0.2293  | 0.3943  | 0.1022  | -0.0482 | 0.1617  | -0.3167 | -0.2872 | 0.0809  | -0.1222 | -0.2779 |

|               |         |         |         |         |         |         |         |         |         |         |         |         |
|---------------|---------|---------|---------|---------|---------|---------|---------|---------|---------|---------|---------|---------|
| PBANKA_133200 | 0.3745  | 0.3637  | 0.0007  | 0.1613  | -0.0126 | -0.1535 | 0.1018  | -0.0433 | -0.1402 | -0.212  | 0.0193  | -0.6366 |
| PBANKA_102500 | -0.782  | -0.8992 | -0.491  | -0.1936 | 0.2459  | 0.006   | 0.5113  | 0.2993  | 0.1625  | -0.0969 | -1.0794 | -0.7208 |
| PBANKA_102820 | -0.1986 | -0.8642 | -0.4025 | 0.1494  | -0.3268 | -1.1091 | 0.044   | 0.3366  | 0.6008  | 0.8543  | 0.292   | 0.1881  |
| PBANKA_070820 | -0.1691 | 0.4155  | 0.1436  | 0.2501  | -0.0299 | -0.1909 | 0.1927  | 0.2649  | 0.1706  | 0.1159  | 0.2333  | 0.2609  |
| PBANKA_030720 | -0.504  | -0.5678 | -0.3555 | -1.1757 | -0.452  | -0.2627 | -0.2256 | -0.6004 | 0.039   | -0.5858 | -0.5963 | -0.2259 |
| PBANKA_130090 | -0.4731 | -0.2386 | -0.839  | -0.6825 | -0.4395 | -0.105  | -0.6914 | -0.8364 | -1.0207 | -0.9658 | -0.34   | -0.9738 |
| PBANKA_113860 | -0.2155 | -0.0738 | -0.2    | 0.0277  | -0.1357 | -0.0945 | -0.1818 | -0.5004 | 0.0194  | 0.1099  | 0.3951  | 0.6944  |
| PBANKA_082850 | -0.34   | -0.3958 | 0.0511  | 0.2579  | 0.4106  | 0.618   | 0.1273  | 0.1588  | 0.3592  | -0.1191 | -0.3946 | -0.2309 |
| PBANKA_031090 | 0.257   | 0.2497  | 0.3395  | 0.2537  | 0.1334  | 0.4123  | -0.0128 | -0.4291 | -0.5931 | -1.089  | -1.1242 | -0.5743 |
| PBANKA_102630 | -0.1078 | -0.1641 | -0.2338 | -0.0744 | 0.0311  | -0.6746 | 0.1986  | 0.4765  | 0.4889  | 0.3998  | 0.7561  | 0.5379  |
| PBANKA_112950 | 0.4532  | -0.1353 | -0.3369 | 0.227   | 0.0909  | 0.3612  | -0.1537 | 0.0286  | -0.347  | -0.5978 | -0.2565 | 0.0499  |
| PBANKA_111790 | 0.4324  | 0.71    | 0.2797  | 0.191   | 0.2279  | 0.5402  | -0.0148 | -0.0079 | -0.2796 | -0.4103 | 0.1915  | -0.2294 |
| PBANKA_052400 | 0.3803  | 0.5243  | 0.6764  | 0.0525  | 0.2463  | 0.3089  | 0.0904  | 0.1711  | 0.1539  | 0.0198  | -0.2699 | -0.1608 |
| PBANKA_132660 | -0.123  | -0.2691 | 0.0231  | 0.3584  | 0.1243  | 0.325   | -0.0724 | -0.0942 | 0.2221  | -0.0149 | 1.0913  | 1.5129  |
| PBANKA_112290 | 0.2034  | 1.0324  | 0.2477  | 0.0832  | -1.0187 | 0.1163  | -0.2729 | -0.4078 | -0.6    | -0.5583 | 0.0514  | 0.01    |
| PBANKA_111860 | -0.4398 | -0.3018 | -0.0073 | 0.1662  | 0.6809  | 0.2156  | -0.0461 | -0.4918 | -0.868  | -1.1205 | -0.7847 | -1.3746 |
| PBANKA_120190 | 0.2047  | 0.202   | 0.5012  | 0.4488  | 0.0367  | -0.0542 | -0.2863 | -0.8446 | -1.111  | -1.743  | -0.8281 | -0.4    |
| PBANKA_132020 | -0.1653 | 0.2187  | -0.0216 | 0.2758  | 0.0235  | 0.3834  | 0.0298  | 0.1316  | 0.2756  | 0.1887  | 0.3451  | -0.0784 |
| PBANKA_143670 | 0.3719  | -1.3054 | 0.3146  | 0.0906  | 0.3381  | -0.0252 | 0.2528  | 0.3315  | 0.179   | -0.4497 | -0.5648 | -0.2914 |
| PBANKA_051750 | -0.099  | 0.4103  | -0.2404 | -0.3089 | -0.289  | -0.5251 | -0.4397 | -0.3324 | -0.1946 | 0.5495  | 1.5127  | 1.5736  |
| PBANKA_102790 | -0.0432 | 0.146   | 0.2521  | 0.3658  | 0.406   | 0.3032  | -0.1493 | -0.4573 | -0.3032 | -0.7313 | -0.7254 | -0.3983 |
| PBANKA_092470 | -0.1874 | -0.5064 | -0.1451 | -0.2795 | -0.2583 | -0.7891 | 0.0475  | -0.8694 | -0.5398 | -0.6549 | -0.4943 | -0.3068 |
| PBANKA_081960 | -0.0897 | 0.0475  | 0.2416  | 0.1325  | 0.0933  | -0.5451 | 0.3701  | 0.3735  | 0.6283  | 0.8156  | 0.8876  | 0.3045  |
| PBANKA_093840 | -1.2985 | -1.1198 | -0.2569 | 0.3372  | 0.2708  | 0.8067  | 0.3437  | -0.1509 | -0.6121 | -1.4176 | -1.7838 | -2.4047 |
| PBANKA_011250 | -0.1404 | -0.3169 | -0.3981 | 0.1867  | -0.132  | -0.6738 | -0.5966 | 0.1933  | 0.4998  | 0.6356  | 0.6134  | 1.3518  |
| PBANKA_111750 | 0.473   | 0.7202  | 0.3706  | -0.0194 | -0.0601 | -0.6073 | -0.4424 | -0.678  | -0.885  | -0.9688 | 0.1298  | -0.1853 |
| PBANKA_040440 | -1.0066 | -1.1319 | -0.4448 | 0.3045  | 0.0683  | 0.7244  | 0.5273  | 0.3017  | 0.2829  | -0.1465 | -1.1914 | -0.8964 |
| PBANKA_082970 | 0.2261  | 0.6975  | 0.1619  | 0.1426  | -0.2302 | -0.6943 | -0.5175 | -0.855  | -0.6779 | -0.448  | 0.2435  | 0.7185  |
| PBANKA_142080 | 0.1538  | 0.3925  | 0.2447  | -1.0334 | 0.1608  | -0.1139 | -0.001  | -0.0487 | 0.1752  | 0.0986  | 0.4669  | 0.782   |
| PBANKA_140980 | -0.9491 | -0.9697 | 0.1041  | -0.2354 | 0.3017  | 0.4973  | 0.2538  | -0.242  | -0.3026 | -0.6903 | -1.392  | -1.0958 |
| PBANKA_070240 | 0.145   | 0.0406  | 0.2425  | 0.235   | -0.3359 | 0.2907  | 0.2344  | 0.5879  | 0.2625  | 0.4688  | 0.2108  | -0.0104 |
| PBANKA_142450 | -0.3428 | -0.2888 | -0.6566 | -0.3225 | -0.5503 | 0.0141  | 0.0378  | 0.526   | 0.8938  | 1.3407  | 0.8397  | 0.3659  |
| PBANKA_052350 | -0.5961 | 0.3386  | 0.2468  | -0.2185 | 0.1411  | -0.2785 | -0.266  | -0.6881 | -1.0143 | -0.8704 | -0.8476 | -0.6009 |
| PBANKA_124320 | -0.3358 | -0.1886 | -0.4487 | -0.2709 | -0.4308 | -0.1634 | 0.029   | 0.2634  | 0.498   | 0.0111  | 0.6524  | 0.9781  |
| PBANKA_101120 | 0.2843  | -0.9988 | 0.0453  | 0.727   | 0.2829  | 0.6345  | 0.0223  | 0.2299  | 0.308   | 0.16    | 0.4454  | -0.0121 |
| PBANKA_123350 | -0.0772 | -0.5238 | -0.0581 | -0.1916 | -0.2328 | -0.7034 | -0.0545 | 0.2861  | 0.247   | 0.4331  | 0.9223  | 0.5285  |
| PBANKA_124700 | -0.8889 | -1.0169 | -1.2664 | -1.0103 | -0.1022 | -0.5786 | 0.2623  | 0.3217  | -0.1599 | 0.1149  | 0.0667  | -0.6611 |
| PBANKA_141610 | -0.4478 | -0.0748 | -0.241  | 0.1611  | 0.1861  | 0.5699  | 0.4876  | 0.4269  | 0.3443  | 0.1149  | -0.567  | -0.6303 |
| PBANKA_111520 | -0.7257 | -0.5087 | -0.5432 | -0.071  | -0.2091 | -0.4605 | 0.1109  | 0.5012  | 0.9646  | 0.9966  | 0.9366  | 0.6293  |
| PBANKA_041360 | 0.1696  | 0.1135  | 0.2954  | 0.3203  | 0.1675  | 0.3027  | -0.3804 | -0.4244 | -0.5666 | -0.6525 | 0.136   | 0.2077  |
| PBANKA_101460 | -0.2764 | -0.0536 | -0.17   | 0.4616  | 0.3576  | 0.2095  | 0.2206  | 0.2724  | 0.0848  | -0.1051 | -0.0963 | -0.4797 |
| PBANKA_145490 | 0.1169  | -0.3    | 0.2362  | 0.3366  | -0.231  | 0.4251  | 0.1445  | 0.452   | 0.2709  | 0.0548  | -0.0083 | -0.6429 |
| PBANKA_120110 | -0.4162 | -0.5448 | -0.0482 | -0.1704 | 0.121   | -0.3232 | -0.1933 | -0.0765 | -0.4405 | -0.1565 | -0.6059 | 0.2667  |
| PBANKA_080230 | 0.19    | 0.2662  | 0.1493  | 0.2344  | 0.2487  | -0.1196 | -0.1545 | -0.0889 | -0.1042 | -0.2181 | 0.1701  | 0.2438  |
| PBANKA_051920 | -2.2889 | -1.2341 | -2.3462 | -1.9721 | -1.532  | -0.8803 | 0.217   | 0.7284  | 1.0122  | 1.6961  | 1.5185  | 0.6737  |
| PBANKA_091970 | 0.6052  | 0.1399  | 0.4298  | 0.6945  | 0.2959  | 0.5964  | -0.0602 | -0.1034 | -0.4428 | -0.5067 | -0.5606 | -0.506  |
| PBANKA_102150 | -0.0031 | -0.4948 | 0.2361  | 0.1843  | 0.0973  | 0.1251  | 0.305   | 0.4142  | 0.1357  | -0.595  | -1.1347 | -2.0154 |
| PBANKA_134150 | 0.2068  | 0.2584  | 0.0613  | -0.2354 | -0.1163 | -0.1928 | -0.6143 | -0.6628 | -1.0326 | -0.7987 | -0.2605 | -0.4761 |
| PBANKA_010610 | 0.2768  | -0.1833 | 0.2573  | 0.1972  | 0.3338  | 0.2605  | 0.0941  | 0.4478  | 0.1733  | -0.025  | -0.111  | 0.2615  |
| PBANKA_052050 | 0.2979  | -0.9397 | 0.0381  | 0.0515  | -0.0116 | 0.7545  | 0.1632  | 0.073   | -0.565  | -0.4606 | -1.0531 | -0.1772 |
| PBANKA_143000 | 0.2013  | -0.0976 | 0.2433  | 0.4705  | 0.1162  | 0.3658  | 0.0322  | -0.2265 | -0.2028 | -0.4417 | -0.4132 | -0.767  |
| PBANKA_120700 | -0.0258 | 0.4139  | -0.1183 | -0.3372 | -0.3874 | -0.5452 | -0.9295 | -0.3846 | -0.0209 | 0.4154  | 0.7488  | 1.7357  |
| PBANKA_040350 | 0.0593  | -0.0356 | 0.2409  | 0.3767  | 0.2791  | 0.3456  | 0.0068  | -0.1444 | 0.3937  | -0.2482 | -0.2085 | -1.1617 |
| PBANKA_040420 | -0.0397 | -0.4466 | 0.1327  | 0.2822  | 0.3421  | 0.5801  | 0.3871  | 0.1078  | -0.11   | -0.5387 | -0.856  | -1.7197 |
| PBANKA_080890 | 0.1622  | 0.3137  | 0.2919  | 0.2445  | 0.0471  | 0.143   | -0.0633 | 0.1574  | -0.2477 | -0.2733 | -0.6232 | -0.5793 |
| PBANKA_113730 | 0.1341  | 0.5422  | 0.0535  | 0.0979  | -0.1087 | 0.326   | -0.0611 | 0.0438  | 0.2265  | 0.1153  | -0.0219 | -0.3208 |
| PBANKA_123460 | 0.3982  | 0.3883  | 0.3527  | 0.0082  | 0.2752  | -0.0525 | 0.0051  | -0.3433 | -0.3657 | -0.5047 | -0.4116 | -0.8657 |
| PBANKA_101220 | -0.4585 | 0.0171  | -0.0134 | 0.104   | 0.1398  | 0.3481  | 0.0884  | 0.1053  | 0.021   | -0.1944 | -0.3897 | -0.3235 |
| PBANKA_145850 | -0.0442 | 0.0157  | 0.078   | 0.5998  | 0.1214  | 0.3899  | 0.0146  | -0.347  | -0.756  | -0.6591 | -0.2814 | -0.5927 |
| PBANKA_146120 | -0.234  | 0.0886  | -0.0766 | -0.3276 | 0.0785  | -0.0459 | -0.302  | -0.2965 | -0.471  | -0.6496 | -0.9196 | -0.3477 |
| PBANKA_051660 | 0.3635  | 0.8021  | 0.4345  | 0.5414  | -0.0923 | 0.0037  | -0.1975 | -0.4665 | -0.9498 | -0.7611 | -0.1454 | -0.663  |
| PBANKA_131270 | -0.6106 | 0.2546  | -0.2915 | -0.941  | -0.1886 | -0.2292 | -0.5199 | 0.2209  | 1.1358  | 1.0991  | 0.8688  | 1.3876  |
| PBANKA_142600 | 0.2775  | 0.4691  | 0.1709  | -0.2552 | 0.0924  | 0.6142  | 0.2502  | -0.0752 | -0.0349 | -0.2233 | -0.4513 | 0.5615  |

|                    |         |         |         |         |         |         |         |         |         |         |         |         |
|--------------------|---------|---------|---------|---------|---------|---------|---------|---------|---------|---------|---------|---------|
| PBANKA_144210      | -0.3943 | -0.5013 | 0.1012  | 0.0349  | 0.0917  | -0.0021 | 0.3227  | 0.4523  | 0.3883  | 0.1044  | -0.1185 | -0.4895 |
| PBANKA_132790      | 0.3682  | 0.5264  | 0.2364  | 0.2558  | 0.2035  | 0.1938  | -0.1836 | -0.0255 | 0.0156  | -0.1317 | -0.2688 | -0.2746 |
| PBANKA_144940      | 0.3282  | 0.1887  | 0.3616  | 0.1557  | 0.1535  | 0.3232  | 0.122   | -0.1944 | -0.3276 | -0.4782 | -0.2529 | 0.752   |
| PBANKA_112050      | 0.3804  | -0.1701 | 0.2986  | 0.6015  | 0.2576  | -0.1417 | 0.0213  | -0.3967 | -0.8105 | -0.7141 | -0.5031 | -0.6286 |
| PBANKA_143200      | 0.3285  | -0.295  | -0.0057 | 0.2032  | 0.118   | 0.0853  | -0.0022 | 0       | -0.2123 | -0.6737 | -0.8838 | -1.449  |
| PBANKA_136100      | -0.2657 | -0.224  | -0.2046 | -0.1846 | -0.4885 | -0.1744 | -0.0397 | 0.457   | 0.9119  | 0.9684  | 0.3644  | 0.1447  |
| PBANKA_132630      | -0.2068 | 0.0005  | 0.0654  | 0.1821  | -0.5733 | -0.0596 | 0.0257  | 0.1552  | -0.0574 | -0.0225 | -0.239  | -0.4568 |
| PBANKA_030270      | -0.2327 | 0.1601  | 0.2365  | -0.0171 | 0.1786  | 0.8174  | -0.0828 | -1.091  | -0.411  | -0.9656 | -1.1005 | -0.2395 |
| PBANKA_102750      | 0.1453  | 0.5692  | 0.3355  | 0.1981  | -0.1576 | -0.1497 | -0.5593 | -0.7703 | -0.3603 | -0.3376 | 0.7872  | 1.0406  |
| PBANKA_060620      | -0.1283 | -0.263  | -0.3847 | -0.0119 | -0.1602 | 0.1212  | -0.2247 | -0.1735 | 0.2098  | 0.4111  | 1.1173  | 1.1921  |
| PBANKA_060970      | 0.5352  | 0.5179  | 0.4801  | 0.4953  | -0.0073 | 0.1786  | -0.221  | -0.1794 | -0.1496 | -0.4047 | -0.3822 | -0.2175 |
| PBANKA_141310      | -0.3515 | 0.4251  | -0.4891 | -0.5424 | -0.3235 | -0.9258 | -0.562  | -0.7185 | -0.8116 | -0.734  | -0.9048 | -0.9372 |
| PBANKA_050420      | 0.4414  | 0.6067  | -0.1801 | 0.3495  | -0.1232 | -0.503  | -0.5968 | -0.0986 | 0.1551  | 0.5754  | 0.4496  | 0.5776  |
| PBANKA_061590      | -0.1571 | -0.3305 | -0.1327 | -0.1414 | -0.1285 | -0.2414 | 0.0441  | 0.3939  | 0.6198  | 0.7793  | 0.4222  | 0.3962  |
| PBANKA_083340      | -0.3195 | -0.3583 | 0.2599  | 0.7759  | 0.528   | 0.7477  | 0.1555  | 0.1951  | -0.2752 | -0.8628 | -1.4581 | -1.2886 |
| PBANKA_144590      | -0.0029 | -1.7012 | -0.1261 | 0.0766  | -0.0527 | 0.0632  | -0.2075 | -0.1504 | 0.3632  | 0.4128  | 0.3691  | -0.165  |
| PBANKA_030610      | -0.2275 | -0.3017 | -0.0158 | -0.1853 | -0.0304 | -0.0067 | -0.0308 | -0.1877 | 0.0019  | 0.2523  | 0.3899  | 0.341   |
| PBANKA_040600      | -0.2947 | -0.4381 | -0.1684 | 0.031   | 0.0756  | -0.4238 | 0.3097  | 0.2748  | 0.6995  | 0.6471  | -0.2385 | 0.1923  |
| PBANKA_092360      | 0.7224  | 0.2697  | 0.6407  | 0.4595  | 0.3023  | -0.2707 | -0.2987 | -0.6118 | -1.0039 | -1.3477 | -1.0775 | -0.9264 |
| PBANKA_145930      | -2.1359 | -1.4626 | -1.2297 | -0.6062 | 0.1155  | 0.3522  | 0.5512  | 0.5741  | 0.4969  | 0.1028  | -0.2207 | -1.141  |
| PBANKA_041770      | -0.8361 | -0.3006 | -0.6665 | -0.0419 | 0.0506  | 0.1224  | 0.386   | 0.1289  | 0.2475  | 0.2539  | -0.0148 | 0.2135  |
| PBANKA_146320      | -0.1844 | -0.3895 | 0.2589  | 0.1759  | 0.0605  | 0.5118  | 0.0202  | -0.0583 | -0.3614 | -0.5483 | -0.4966 | -0.3423 |
| PBANKA_093090      | -0.8143 | -0.5309 | -0.1681 | -0.1573 | 0.1594  | 0.0633  | 0.1769  | -0.0436 | -0.155  | -0.2041 | -0.8109 | -0.8475 |
| PBANKA_083130      | 0.2653  | 0.2151  | 0.1053  | 0.1753  | 0.2632  | 0.2217  | 0.2238  | 0.4505  | -0.1353 | -0.0816 | -0.2988 | -0.1946 |
| PBANKA_030630      | -0.0274 | 0.0033  | -0.1314 | 0.0016  | 0.0462  | 0.2173  | 0.1216  | -0.1266 | -0.2968 | -0.6825 | -0.3667 | -0.6385 |
| PBANKA_135470      | -0.5928 | -0.4729 | -0.155  | -0.3963 | -0.0835 | 0.2143  | 0.3809  | 0.229   | -0.1044 | -0.4007 | -0.9701 | -0.6403 |
| PBANKA_092170      | -1.0605 | -0.3533 | -0.4768 | -0.2555 | -0.4745 | -0.3422 | 0.0977  | 0.7469  | 1.164   | 1.4156  | 0.9007  | 0.4105  |
| PBANKA_101280      | 0.329   | 0.1814  | 0.4179  | 0.6451  | 0.1685  | 0.4889  | -0.0138 | -1.0109 | -0.8089 | -1.2981 | -1.1418 | -1.0838 |
| PBANKA_094360      | 0.0766  | 0.1602  | -0.0576 | 0.3198  | 0.4189  | -0.0245 | -0.6714 | -1.1026 | -0.8985 | -2.0144 | -0.3618 | -0.4713 |
| PBANKA_031270      | 0.4615  | 0.3972  | 0.2445  | 0.381   | 0.1098  | 0.2572  | 0.1238  | -0.0538 | -0.3373 | -0.5075 | -1.0065 | -0.5563 |
| PBANKA_091490      | 0.4951  | -0.2097 | -0.0669 | 0.0368  | 0.0932  | 0.1128  | -0.1028 | -0.2968 | -0.4546 | -0.7477 | -0.8678 | -1.4206 |
| PBANKA_114430      | -0.3084 | -0.4179 | -0.3561 | -0.1634 | 0.1131  | 0.1968  | 0.543   | 0.7489  | 0.722   | 0.6535  | -0.0512 | -0.8972 |
| PBANKA_113320      | -0.5334 | -0.8089 | -0.1803 | 0.5181  | 0.5007  | 0.6249  | 0.495   | -0.1156 | -0.0501 | -0.7362 | -0.5575 | -0.0837 |
| PBANKA_121500      | 0.2093  | 0.4081  | 0.0706  | 0.6236  | 0.3339  | 0.6229  | 0.3459  | 0.4037  | 0.2246  | 0.0642  | -0.2702 | -0.4167 |
| PBANKA_110780      | -0.3114 | 0.0626  | 0.0065  | -0.013  | 0.0518  | 0.1779  | 0.0624  | 0.1903  | 0.6521  | 0.0682  | -0.6047 | -0.1814 |
| PBANKA_110870      | -0.5283 | -0.9111 | -0.2451 | 0.0198  | 0.0205  | 0.3687  | 0.1328  | 0.1833  | 0.3906  | 0.5388  | 0.4382  | 0.2024  |
| PBANKA_092420      | 0.1477  | 0.4484  | 0.2182  | 0.2552  | -0.0037 | -0.0366 | -0.0643 | -0.2794 | -0.6335 | -0.5778 | -1.0694 | -0.0838 |
| PBANKA_092720      | -0.4122 | -0.0559 | 0.0952  | -0.429  | -0.0103 | -0.0444 | -0.0115 | -0.131  | 0.0575  | 0.2296  | 0.1448  | -0.0712 |
| PBANKA_135130      | -0.2012 | -1.0287 | -0.0183 | 0.1509  | 0.0333  | 0.5605  | 0.3129  | 0.5783  | 0.4848  | 0.4905  | -0.0216 | -0.2024 |
| PBANKA_135870      | 0.135   | 0.4602  | 0.1246  | -0.1551 | -0.0168 | -0.3193 | -0.0596 | -0.2245 | -0.2491 | -0.3889 | -0.3877 | -0.3828 |
| PBANKA_041400      | -0.0654 | -0.3085 | 0.1441  | -0.3596 | 0.0598  | -0.147  | 0.1564  | 0.3563  | 0.2422  | -0.2016 | -0.1529 | -1.078  |
| PBANKA_072090      | -0.2345 | 0.3559  | -0.4783 | 0.1758  | -0.196  | -0.3476 | -0.3124 | -0.0069 | 0.5401  | 0.65    | 1.5172  | 1.8074  |
| PBANKA_142110      | 0.4618  | -0.0634 | 0.3593  | 0.4998  | 0.3092  | 0.3023  | 0.0137  | -0.4419 | -0.5194 | -0.6457 | -1.067  | -1.3674 |
| PBANKA_080360      | 0.2346  | 0.7391  | 0.1857  | -0.5559 | -0.0249 | -0.0842 | -0.0122 | -0.0137 | -0.3415 | -0.1453 | -0.0081 | 0.0475  |
| PBANKA_070930      | 0.8539  | 0.1285  | 0.4383  | 0.0066  | 0.4849  | 0.4368  | -0.2098 | -0.1206 | -0.3995 | -0.631  | -0.5719 | -0.7143 |
| PBANKA_100060      | -0.0794 | 0.6085  | -0.0452 | -0.7397 | -0.1298 | -0.9017 | -0.9914 | -0.7274 | -0.359  | 0.3225  | 1.3622  | 2.0531  |
| PBANKA_041700      | 0.7566  | 0.1697  | 0.2148  | 0.5517  | 0.5303  | 0.4457  | 0.0643  | -0.2216 | -0.7709 | -0.7102 | -0.8214 | -0.5264 |
| PBANKA_050660      | -0.2948 | -0.9322 | -0.1247 | -0.1438 | -0.0539 | 0.1964  | 0.3198  | 0.3176  | 0.088   | -0.3921 | -0.9746 | -1.1813 |
| PBANKA_122770      | -0.1756 | 0.0719  | 0.0046  | -0.264  | 0.1889  | 0.741   | -0.0436 | 0.2381  | 0.5625  | 0.1979  | -0.274  | -0.3228 |
| PBANKA_120250      | 0.175   | 0.5304  | 0.267   | -0.1221 | 0.2262  | 0.0688  | 0.0502  | -0.1055 | 0.1266  | 0.2054  | -0.0729 | -1.5987 |
| PBANKA_071530      | -0.9148 | -0.428  | -0.8604 | -0.5621 | -0.413  | -0.0424 | 0.2485  | -0.0644 | 0.215   | 0.1364  | 0.1136  | -0.0135 |
| PBANKA_144190      | 0.5923  | 0.6094  | 0.3503  | 1.0198  | -0.2789 | 0.1907  | -0.4995 | -0.2478 | -0.9122 | -0.3122 | 0.1458  | 0.2926  |
| PBANKA_131470      | 0.6418  | 0.4862  | 0.3931  | -0.019  | 0.2825  | 0.4665  | 0.1576  | -0.257  | -0.0316 | -0.3943 | -0.3461 | -0.6438 |
| PBANKA_145900      | 0.2309  | 1.2081  | 0.445   | 0.0522  | -0.3374 | -1.3695 | -0.5045 | -0.4867 | -0.429  | 0.044   | 0.4369  | 0.9012  |
| PBANKA_031630      | -0.055  | -0.2816 | -0.6095 | -0.005  | -0.2842 | -0.1813 | -0.0437 | 0.2066  | 0.5066  | 0.8831  | 0.4824  | 1.9964  |
| PBANKA_113260      | -0.4099 | 0.3544  | -0.2275 | 0.4197  | 0.4189  | 0.1914  | 0.0417  | -0.316  | -0.4598 | -0.5716 | -0.4741 | -0.9463 |
| PBANKA_120060      | 0.0112  | 0.5014  | -0.3992 | -0.5162 | -0.2001 | 0.0352  | -0.5095 | -0.2493 | 0.2942  | 0.6041  | 1.6337  | 1.9199  |
| PBANKA_071330      | -0.6489 | -0.4789 | 0.1705  | 0.3019  | 0.5398  | 0.5513  | 0.2336  | -0.0824 | -0.7061 | -1.3951 | -1.1914 | -2.0462 |
| PBANKA_083520      | 0.0337  | -0.9672 | 0.0989  | 0.1521  | 0.3374  | -0.0217 | 0.1299  | 0.2947  | -0.4218 | -0.2433 | -0.4869 | -1.8661 |
| PBANKA_101520      | 0.0572  | -0.138  | -0.0262 | 0.1515  | -0.0465 | -0.0461 | -0.0423 | 0.0849  | 0.0439  | 0.0031  | 0.6355  | -1.8156 |
| berg08:tRNA:rfamsc | 0.5212  | 1.0245  | 0.3747  | -0.1971 | -0.6668 | -0.3409 | -0.5724 | -0.3543 | -0.5691 | 0.0918  | 0.6143  | 1.007   |
| PBANKA_071320      | -0.7078 | -0.7433 | -0.7896 | -1.1769 | -0.6855 | -0.2783 | 0.1955  | 0.6598  | -0.7659 | 1.3887  | 0.4975  | -0.1265 |
| PBANKA_114140      | -0.2686 | -2.0188 | -0.6845 | -0.4249 | -0.3672 | -0.3991 | -0.4629 | 0.0741  | 0.4668  | 0.5568  | 1.4307  | 0.9543  |

|               |         |         |         |         |         |         |         |         |         |         |         |         |
|---------------|---------|---------|---------|---------|---------|---------|---------|---------|---------|---------|---------|---------|
| PBANKA_010100 | 0.2329  | -0.1143 | 0.3761  | 0.2348  | 0.2926  | 0.4853  | -0.1946 | -0.7666 | -1.0876 | -1.5519 | -1.3183 | -1.2806 |
| PBANKA_031600 | -0.3952 | -0.0866 | 0.3104  | -0.0879 | 0.0092  | 0.2456  | 0.0307  | 0.3062  | 0.164   | 0.1735  | -0.1324 | -0.2866 |
| PBANKA_071190 | 0.3224  | 0.4194  | 0.5828  | 0.2887  | 0.6706  | 0.2265  | -0.8644 | -0.8569 | -1.1267 | -1.9402 | -1.4807 | -1.6393 |
| PBANKA_061690 | 0.3535  | 0.7008  | 0.1567  | 0.2954  | 0.4422  | 0.1066  | -0.3311 | 0.0235  | -0.1085 | -0.1121 | -0.3956 | -0.3998 |
| PBANKA_111590 | -0.1956 | -0.0753 | -0.0747 | -0.0907 | -0.2151 | -0.996  | 0.3159  | 0.5793  | 0.8108  | 0.9222  | 0.3223  | 0.1657  |
| PBANKA_136030 | 0.7827  | 0.8094  | 0.4965  | 0.2097  | 0.4578  | 0.0741  | -0.4007 | -0.6251 | -0.9534 | -1.3895 | -1.1726 | -1.3905 |
| PBANKA_144470 | 0.1722  | 0.3641  | -0.0985 | 0.0497  | 0.0977  | 0.3436  | 0.079   | 0.0994  | -0.3178 | -0.1721 | -0.2535 | -0.5174 |
| PBANKA_103050 | -0.4085 | 0.2032  | -0.0156 | -0.4231 | -0.0168 | 0.2144  | 0.0728  | -0.172  | -0.0722 | -0.2179 | 0.0961  | -0.6786 |
| PBANKA_122360 | 0.1805  | 0.2006  | 0.3679  | 0.1341  | 0.5478  | 0.1579  | 0.306   | -0.0076 | -0.6882 | -0.9631 | -1.0756 | -1.0697 |
| PBANKA_081000 | 0.6902  | -0.1134 | 0.001   | 0.3303  | -0.9091 | -0.1527 | -0.2244 | -0.0454 | 0.2392  | -0.3095 | -0.0312 | -0.0263 |
| PBANKA_136400 | 0.1501  | 0.3492  | 0.0696  | -0.0746 | 0.1144  | -0.0815 | -0.0847 | -0.2978 | -0.1049 | -0.1157 | -0.4915 | -0.5316 |
| PBANKA_080650 | 0.3038  | 0.0007  | -0.0993 | 0.5133  | -0.1353 | 0.1798  | -0.2176 | -0.3505 | -0.7165 | -1.0269 | -0.6072 | -1.0967 |
| PBANKA_051820 | -0.3874 | 0.473   | 0.2527  | -0.0873 | 0.0686  | -0.1401 | -0.2491 | -0.1191 | -0.7274 | -0.5838 | -0.4958 | -0.6484 |
| PBANKA_134560 | -0.1536 | -0.2582 | 0.0708  | 0.1173  | 0.0969  | -0.1748 | -0.1833 | -0.2979 | -0.4342 | -0.8414 | -0.4011 | 0.0451  |
| PBANKA_080870 | 0.3657  | 1.1729  | 0.2161  | 0.0944  | -0.3044 | 0.2554  | -0.1781 | -0.3325 | -0.0806 | 0.1159  | 0.652   | 0.5082  |
| PBANKA_081050 | 0.4623  | 0.2873  | 0.2895  | 0.2103  | 0.2161  | -0.0273 | -0.4494 | -0.7873 | -0.5196 | -0.4363 | 0.4173  | 0.2895  |
| PBANKA_122520 | -0.0867 | -0.8789 | 0.3737  | 0.6672  | 0.4945  | 0.8279  | 0.0209  | -0.674  | -0.7462 | -1.3564 | -1.289  | -1.2317 |
| PBANKA_140820 | 0.3854  | -0.0924 | 0.2463  | 0.235   | 0.0966  | 0.3825  | 0.1127  | -0.249  | -0.478  | -0.2734 | -0.1466 | -0.2041 |
| PBANKA_021400 | -0.1926 | -0.8757 | -0.0498 | -0.1137 | -0.1182 | -0.5944 | 0.0936  | 0.0715  | 0.1356  | 0.2374  | 0.4592  | 0.2437  |
| PBANKA_123280 | 0.2585  | 0.2313  | -0.0024 | 0.3296  | 0.0949  | 0.2086  | 0.4734  | 0.3867  | 0.1735  | 0.0799  | -0.3953 | -0.4361 |
| PBANKA_114580 | 0.0699  | -0.3017 | -0.017  | 0.2947  | 0.1483  | 0.094   | -0.1972 | -0.337  | -0.138  | -0.6986 | -0.0498 | 0.4118  |
| PBANKA_092210 | 0.3117  | 0.0889  | 0.3958  | 0.5155  | 0.4621  | 0.1774  | -0.0314 | -0.417  | -0.7001 | -1.4605 | -0.8933 | -0.1041 |
| PBANKA_100080 | 0.5791  | 0.1765  | 0.3203  | 0.503   | 0.3098  | 0.3342  | -0.1782 | -0.3844 | -0.9472 | -1.1881 | -1.0963 | -1.2451 |
| PBANKA_081710 | -0.0381 | -0.3148 | 0.5169  | -0.0068 | 0.2772  | 0.3577  | 0.7241  | 0.272   | 0.3795  | 0.0461  | -0.3807 | 0.1187  |
| PBANKA_080080 | -0.2055 | -0.1111 | -0.0298 | 0.179   | 0.3855  | 0.6111  | 0.1164  | 0.1756  | 0.2219  | 0.0426  | -0.2047 | -0.1976 |
| PBANKA_092890 | 0.0458  | 0.7063  | 0.2215  | 0.787   | 0.2323  | 0.5236  | 0.3849  | 0.1601  | 0.1361  | -0.1213 | 0.1609  | 0.3909  |
| PBANKA_091250 | -0.4387 | -0.4052 | -0.0257 | -0.3619 | 0.1024  | 0.5812  | 0.142   | 0.3817  | 0.6152  | 0.8776  | 0.8259  | 2.0649  |
| PBANKA_132330 | -0.9091 | -0.1282 | -0.0635 | 0.3664  | 0.2641  | 0.1731  | 0.3571  | 0.0935  | 0.2048  | 0.0523  | -0.3653 | 0.0941  |
| PBANKA_071200 | -0.4925 | 0.1979  | -0.1035 | 0.2842  | -1.3239 | 0.2586  | 0.0211  | -0.3137 | 0.2724  | 0.3181  | 1.4211  | 1.4615  |
| PBANKA_051200 | -0.0871 | -0.1698 | 0.3975  | 0.4739  | 0.2944  | 0.7391  | 0.0397  | 0.2345  | 0.3219  | 0.0694  | 0.8097  | 1.2058  |
| PBANKA_020820 | -0.3969 | 0.0253  | 0.0762  | 0.4868  | 0.1136  | 0.4554  | 0.1973  | 0.1722  | 0.1895  | -0.1671 | -0.4976 | -0.8746 |
| PBANKA_050170 | -1.0106 | -0.3843 | -0.8523 | -0.7537 | -0.2714 | 0.1422  | 0.2166  | 0.2539  | 0.3099  | 0.2879  | 0.0831  | -0.3228 |
| PBANKA_120130 | -0.1818 | -0.2574 | -0.3647 | 0.1166  | -0.2876 | -0.141  | -0.0086 | 0.2235  | 0.058   | 0.3617  | -0.2638 | -0.5083 |
| PBANKA_091580 | 0.3487  | 0.6603  | 0.2831  | 0.4976  | 0.2556  | 0.629   | 0.0515  | 0.0376  | 0.2786  | 0.1449  | 0.5762  | 0.707   |
| PBANKA_100760 | 0.214   | 0.8982  | 0.2039  | 0.2906  | 0.1649  | 0.0702  | -0.0241 | -0.1693 | 0.0502  | -0.2265 | -0.0928 | -0.1642 |
| PBANKA_020970 | 0.2934  | -0.5386 | 0.1005  | -0.3334 | -0.2706 | 0.228   | 0.2126  | 0.7111  | 0.086   | 0.247   | 0.2306  | -0.3516 |
| PBANKA_083040 | -0.5062 | -0.3418 | -0.891  | -0.6903 | -0.3821 | -0.0031 | -0.3249 | -0.0055 | 0.3811  | 0.8712  | 1.2705  | 1.6343  |
| PBANKA_092180 | -0.104  | -0.2387 | -0.1285 | 0.489   | -0.1995 | 0.2132  | 0.136   | 0.1973  | 0.153   | 0.4258  | 1.0348  | 0.762   |
| PBANKA_121620 | -0.56   | 0.1515  | -0.3802 | -1.0467 | -0.1953 | -0.0412 | -0.3793 | -0.4784 | -0.3582 | -0.3567 | -0.4664 | -0.2104 |
| PBANKA_101440 | 0.2089  | 0.2083  | 0.4043  | 0.6119  | 0.1913  | 0.2887  | -0.1152 | -0.013  | -0.6005 | -0.5419 | -0.289  | -0.9305 |
| PBANKA_061840 | -0.2259 | -0.1667 | -0.1633 | 0.2864  | 0.1692  | 0.2566  | 0.433   | -0.0096 | -0.1152 | -0.2152 | -0.8334 | -0.9091 |
| PBANKA_092670 | -0.7225 | -0.1576 | -0.5934 | -0.5115 | -0.4441 | -0.4141 | -0.1258 | 0.2521  | 0.8864  | 1.1624  | 1.0939  | 1.4358  |
| PBANKA_135060 | 0.8683  | 0.54    | 0.1674  | 0.3647  | -0.0319 | -0.139  | -0.2272 | -0.3519 | -0.4296 | -0.9693 | -0.3098 | -0.4881 |
| PBANKA_103660 | -1.0846 | -0.6669 | -0.8041 | -0.1826 | 0.1127  | 0.3197  | 0.4896  | 0.5412  | 0.2773  | 0.0389  | -0.9985 | -1.0362 |
| PBANKA_110180 | 0.6697  | 0.5562  | 0.0177  | 0.7198  | 0.259   | 0.0806  | 0.2217  | 0.1752  | 0.2646  | -0.1378 | 0.2785  | -0.0066 |
| PBANKA_103980 | -0.0757 | 0.8111  | -0.4877 | -0.5044 | -0.6077 | -0.1774 | -0.3168 | -0.5062 | -0.33   | -0.4013 | -0.214  | -0.1703 |
| PBANKA_146290 | 0.3092  | 0.1372  | -0.0754 | -0.279  | -0.3404 | -0.2166 | -0.3545 | -0.2002 | 0.3217  | 0.7559  | 0.9528  | 1.5756  |
| PBANKA_070080 | -1.0362 | -0.8779 | -1.344  | -0.535  | -0.1175 | 0.0699  | 0.4955  | 0.1387  | 0.0882  | 0.1807  | -0.2436 | -0.2881 |
| PBANKA_143270 | -0.0511 | 0.2754  | 0.1843  | 0.2953  | 0.4726  | 0.8255  | 0.1703  | 0.3285  | 0.305   | 0.2268  | 0.5439  | 0.5497  |
| PBANKA_141660 | 0.1554  | -0.6049 | 0.0881  | 0.3869  | 0.4414  | 0.2872  | 0.2611  | -0.4627 | -0.6797 | -1.213  | -1.0092 | -1.0076 |
| PBANKA_121660 | 0.1532  | -0.0756 | 0.137   | 0.3999  | 0.4074  | 0.4137  | 0.2397  | -0.2038 | 0.1941  | -0.0003 | 0.0066  | 0.5019  |
| PBANKA_135880 | -0.8309 | -0.1081 | -0.5005 | -0.1705 | -0.0448 | -0.3793 | 0.4442  | 0.0891  | 0.0982  | -0.1397 | -0.7443 | -0.7629 |
| PBANKA_080660 | -0.3384 | 0.2631  | -0.1798 | -0.3302 | -0.1245 | -0.7627 | -0.3455 | -1.0109 | -0.8844 | -0.7396 | -0.6153 | -0.4764 |
| PBANKA_140670 | 0.3737  | 0.5433  | -0.083  | -0.1498 | 0.0591  | -0.8944 | -0.0319 | 0.0381  | 0.0144  | -0.7091 | -0.0021 | -0.1728 |
| PBANKA_114160 | 0.2271  | -0.3501 | 0.248   | 0.264   | 0.1112  | 0.5755  | 0.2848  | 0.3735  | 0.4181  | 0.5477  | 0.3597  | -0.3211 |
| PBANKA_060840 | 0.319   | -0.339  | 0.2678  | 0.3498  | 0.2136  | 0.5873  | 0.0586  | -0.4318 | -0.1473 | -0.718  | -0.9845 | -0.1551 |
| PBANKA_011130 | -0.7143 | -1.1097 | 0.1407  | 0.6573  | 0.769   | 0.6435  | -0.0146 | -0.83   | -1.2252 | -1.7219 | -1.5743 | -2.4242 |
| PBANKA_132120 | 0.0677  | -0.148  | -0.1727 | -0.2393 | -0.3192 | -0.5247 | -0.2131 | -0.1101 | -0.1004 | -0.2889 | -0.3113 | -0.0746 |
| PBANKA_130630 | 0.353   | 0.1835  | -0.3925 | -0.36   | -0.1294 | 0.2177  | -0.262  | -0.1555 | 0.1516  | -0.0925 | -0.7325 | -0.5621 |
| PBANKA_134790 | -0.0505 | 0.2322  | 0.0359  | 0.035   | 0.1795  | 0.3828  | 0.1509  | 0.2598  | 0.33    | 0.289   | -0.3683 | -0.5551 |
| PBANKA_031430 | -0.0801 | -0.1168 | -0.051  | 0.2856  | -0.2535 | 0.2538  | 0.0366  | 0.1147  | 0.1442  | 0.2342  | 0.7622  | 0.1159  |
| PBANKA_090830 | 0.0854  | 0.3601  | -0.1451 | -0.1346 | -0.1057 | -0.3321 | -0.5107 | -0.1273 | 0.2504  | 0.6869  | 1.4958  | 1.2938  |
| PBANKA_071280 | 0.9306  | 0.1384  | 0.1241  | -0.0985 | -0.5047 | -0.7609 | -0.5584 | -0.6961 | -0.4363 | 0.2527  | 0.4808  | 0.6707  |



|               |         |         |         |         |         |         |         |         |         |         |         |         |
|---------------|---------|---------|---------|---------|---------|---------|---------|---------|---------|---------|---------|---------|
| PBANKA_101870 | 0.2751  | 0.3512  | 0.0526  | 0.8207  | 0.2425  | 0.372   | 0.0014  | -0.3059 | -0.5289 | -0.7831 | -0.2528 | 0.0684  |
| PBANKA_051250 | 0.442   | 0.2909  | -0.4296 | -0.1072 | -0.4719 | -0.7869 | -0.5962 | -0.2109 | 0.6188  | 0.9532  | 1.1703  | 1.5598  |
| PBANKA_071770 | 0.1385  | -0.5301 | 0.4991  | 0.6021  | 0.7923  | 0.6612  | 0.3837  | 0.0527  | 0.0687  | -0.1519 | -0.1483 | -0.261  |
| PBANKA_145430 | 0.2982  | 0.0111  | -0.012  | -0.0866 | 0.1517  | 0.0695  | -0.1757 | -0.089  | -0.6714 | -0.6636 | 0.1532  | -0.6296 |
| PBANKA_122740 | 0.1895  | 0.1192  | 0.056   | 0.1094  | 0.1518  | -0.0616 | 0.3608  | 0.2555  | 0.3515  | 0.4122  | -0.4964 | 0.4663  |
| PBANKA_061160 | -0.44   | 0.1926  | -0.2746 | -0.1928 | -0.0507 | 0.1158  | 0.1626  | 0.2735  | 0.2145  | 0.2466  | -0.4276 | 0.8015  |
| PBANKA_123990 | -0.0666 | 0.4756  | 0.1     | -0.3528 | -0.1287 | 0.0678  | 0.1222  | 0.0179  | -0.1461 | -0.2279 | -0.3617 | -0.3729 |
| PBANKA_112820 | 0.6412  | 0.6594  | 0.2511  | -0.0197 | -0.3959 | -0.0211 | -0.7291 | -0.5144 | -0.0497 | 0.5615  | 1.1968  | 1.4767  |
| PBANKA_093780 | -0.0455 | 0.2379  | -0.1753 | -0.0847 | -0.3153 | -0.143  | -0.2604 | -0.1591 | 0.2553  | 0.4352  | 0.6449  | 1.4388  |
| PBANKA_010190 | 0.2079  | 0.0992  | -0.258  | -0.3755 | -0.083  | -0.2008 | -0.1773 | -0.1678 | -0.47   | -0.2319 | -0.4671 | -0.702  |
| PBANKA_021190 | 0.019   | 0.221   | 0.0317  | -0.4146 | -0.0684 | 0.3208  | 0.2559  | 0.3955  | 0.0341  | 0.1001  | -0.1705 | -0.0587 |
| PBANKA_070680 | -0.1715 | 1.4074  | -0.1511 | 0.3352  | 0.3879  | 0.1838  | 0.2047  | -0.0482 | 0.1047  | -0.1606 | -0.2541 | -0.6504 |
| PBANKA_132210 | -0.5986 | -0.1673 | -0.166  | 0.0706  | 0.3336  | -0.0477 | 0.2841  | 0.1163  | -0.1168 | -0.104  | 0.0781  | -0.1905 |
| PBANKA_051020 | 0.3727  | -0.22   | 0.0745  | -0.0189 | 0.0664  | 0.0361  | -0.1017 | 0.3189  | 0.9609  | 0.2443  | -0.2968 | -0.6077 |
| PBANKA_101620 | 0.0049  | 0.3791  | -0.0855 | 0.2943  | 0.0225  | 0.3697  | 0.0758  | 0.1866  | 0.1043  | 0.2418  | 0.0063  | -0.0093 |
| PBANKA_121730 | -0.2074 | 0.5961  | -0.4378 | -0.092  | 0.132   | 0.2935  | 0.054   | 0.0173  | 0.1172  | -0.1776 | -0.0666 | -0.5895 |
| PBANKA_091130 | 0.3138  | -0.7323 | 0.0936  | -0.0535 | 0.3993  | 0.0414  | -0.2125 | -0.5681 | -0.2144 | -0.7511 | -0.8615 | -0.3561 |
| PBANKA_010600 | -0.6191 | -0.5793 | -0.1128 | 0.1581  | 0.1313  | 0.3487  | 0.4017  | 0.8323  | 0.4422  | 0.3409  | -0.5303 | -0.6659 |
| PBANKA_100790 | 0.2896  | 0.1491  | -0.1989 | 0.3156  | 0.0917  | -0.0879 | -0.1692 | 0.2114  | -0.0269 | 0.3755  | 0.4416  | 0.6121  |
| PBANKA_135780 | 0.4747  | 0.4396  | 0.0795  | -1.1442 | -0.6958 | -0.906  | -0.2217 | -0.6041 | -0.3609 | 0.209   | 0.3866  | 0.6311  |
| PBANKA_092430 | 0.1269  | 0.1993  | -0.1101 | -0.2858 | 0.1159  | 0.3817  | 0.2146  | 0.4415  | 0.1623  | -0.0352 | 0.0976  | 0.1733  |
| PBANKA_021200 | 0.0101  | 0.1789  | 0.0126  | 0.2084  | 0.1374  | -0.1567 | 0.3623  | 0.5934  | 0.3975  | 0.5175  | 0.3231  | 0.1552  |
| PBANKA_110110 | -0.6395 | -0.7477 | -1.4745 | -1.3137 | -1.9729 | -1.4742 | -0.7012 | 0.3839  | 1.2002  | 1.391   | 1.1262  | 2.6093  |
| PBANKA_071580 | -0.2835 | -0.4019 | -0.1728 | -0.2177 | -0.1338 | 0.1213  | 0.2606  | 0.4494  | -0.0565 | -0.0616 | -0.759  | -0.5322 |
| PBANKA_122690 | -0.711  | -0.7586 | -0.4064 | -0.2159 | -0.1048 | -0.4784 | 0.3865  | 0.0596  | 0.1529  | -0.0292 | -0.4982 | -0.6299 |
| PBANKA_101160 | -0.5177 | 0.3316  | 0.2487  | 0.4113  | 0.0891  | -0.0741 | -0.2136 | -0.2906 | -0.0327 | -0.0767 | 1.1406  | 0.1379  |
| PBANKA_011050 | -0.393  | -0.7869 | -0.4403 | -0.1399 | 0.0155  | 0.0464  | 0.0956  | 0.4477  | 0.67    | 0.989   | 0.1871  | -0.0601 |
| PBANKA_141010 | -0.3212 | -0.6528 | -0.3706 | -0.0458 | -1.1399 | 0.2714  | -0.3772 | 0.3735  | 0.5464  | 0.378   | 0.9108  | 1.2526  |
| PBANKA_052330 | -0.5019 | 0.0904  | 0.1842  | 0.2612  | 0.4597  | 0.3146  | 0.7078  | -0.2957 | -0.5771 | -0.759  | -0.7013 | -0.806  |
| PBANKA_091030 | -0.2634 | -0.2227 | -0.3808 | -0.0157 | 0.0509  | -0.6347 | 0.0775  | 0.2428  | 0.3361  | 0.4835  | 0.289   | -0.0143 |
| PBANKA_120930 | 0.2567  | -0.1627 | 0.2586  | 0.9912  | 0.8572  | 0.6585  | 0.2136  | 0.1722  | 0.2428  | -0.2949 | -0.4267 | -0.3834 |
| PBANKA_050520 | -0.637  | -1.2721 | -0.4894 | -0.1067 | 0.1777  | -0.1134 | 0.5981  | 0.1426  | -0.0416 | 0.0458  | -0.6141 | -0.5988 |
| PBANKA_113300 | 0.175   | 1.1499  | 0.4185  | 0.0207  | 0.2869  | -0.1235 | -0.9674 | -0.9578 | -1.26   | -0.9546 | -0.2614 | -0.9377 |
| PBANKA_083430 | 0.3639  | 0.13    | 0.3339  | 0.4445  | -0.0651 | 0.2179  | -0.0205 | -0.4283 | -0.0472 | -0.3449 | -0.5586 | -0.5871 |
| PBANKA_133140 | 0.6449  | 1.0707  | 0.2226  | -0.051  | -0.1631 | -0.2556 | -0.116  | 0.1597  | 0.0096  | 0.0875  | -0.1622 | -0.1581 |
| PBANKA_123980 | 0.2896  | 1.6385  | 0.5827  | -0.5376 | -0.34   | -0.1708 | -0.5985 | -0.7967 | -0.4713 | -0.1798 | 0.5402  | 0.489   |
| PBANKA_132708 | -0.7539 | -0.7205 | 0.1692  | 0.476   | 0.4503  | 0.2219  | 0.4726  | 0.1276  | -0.1381 | -0.9156 | -1.1768 | -0.754  |
| PBANKA_114290 | -0.1262 | -0.1471 | 0.1475  | 0.2773  | 0.3127  | 0.4032  | -0.1338 | -0.6216 | -0.5529 | -1.185  | -1.2871 | -0.4599 |
| PBANKA_030130 | -0.8215 | -1.4138 | -0.4725 | -0.0207 | 0.0357  | 0.3547  | 0.3748  | 0.4545  | 0.4954  | 0.0534  | 0.1189  | -0.3904 |
| PBANKA_052290 | 0.6346  | 0.1193  | 0.2542  | 0.2375  | 0.3733  | 0.1109  | -0.0231 | -0.0999 | -0.067  | -0.154  | -0.1038 | -0.6397 |
| PBANKA_102490 | -0.5886 | -0.2826 | -0.0176 | -0.5535 | -0.1428 | -0.1038 | 0.4369  | 0.4697  | -0.0182 | 0.0726  | -0.6071 | -0.7582 |
| PBANKA_121710 | -0.7579 | -1.0079 | -0.5466 | -0.2921 | -0.0514 | -0.7925 | 0.3498  | 0.9644  | 0.7612  | 0.7192  | 0.04    | -0.0424 |
| PBANKA_030880 | -0.4595 | -0.1271 | -0.3458 | -0.2654 | -0.4403 | -0.1908 | 0.0532  | 0.2438  | 0.3092  | 0.231   | -0.38   | -0.4138 |
| PBANKA_122610 | 0.3383  | 0.1682  | 0.2106  | 0.1543  | 0.2007  | 0.0266  | 0.2279  | -0.0312 | 0.0061  | -0.2815 | -0.478  | -0.5271 |
| PBANKA_140500 | -0.0962 | -0.2723 | 0.0074  | 0.0841  | -0.2744 | 0.098   | -0.1327 | -0.0845 | -0.075  | 0.0976  | 0.1497  | 0.3473  |
| PBANKA_122680 | -0.5425 | -0.3575 | 0.059   | 0.2387  | 0.0576  | 0.5813  | 0.3367  | 0.1068  | 0.1456  | 0.1714  | -0.1256 | -0.5682 |
| PBANKA_070630 | 0.7312  | -0.0329 | 0.2031  | 0.4524  | -0.0324 | 0.1359  | -0.4421 | -1.0273 | -0.8992 | -0.7242 | -0.6636 | -0.9541 |
| PBANKA_020460 | -2.034  | -0.9169 | -2.0518 | -1.3388 | -1.8948 | -0.6391 | -0.0163 | 0.6305  | 1.1378  | 1.6288  | 1.7598  | 1.1514  |
| PBANKA_081500 | 0.226   | 0.1738  | -0.3547 | -0.3702 | 0.1635  | -0.0572 | -0.2244 | -0.1719 | -0.2416 | -0.4007 | -0.0142 | -0.3451 |
| PBANKA_113410 | -0.229  | 0.8972  | 0.4647  | 0.0729  | 0.3652  | 0.4589  | 0.0985  | -0.6024 | -0.9582 | -1.2045 | -0.8591 | -0.5368 |
| PBANKA_031010 | -0.1999 | -0.2164 | 0.0269  | 0.4451  | 0.4259  | 0.1487  | 0.2644  | -0.164  | -0.1927 | -0.7049 | -0.4113 | -0.6876 |
| PBANKA_134760 | 0.2969  | -0.8458 | 0.062   | 0.102   | -0.0907 | 0.2534  | -0.435  | -0.1063 | -0.724  | -0.5893 | 0.0629  | 0.6835  |
| PBANKA_020200 | 0.5051  | 0.2055  | 0.2406  | 0.3596  | 0.1161  | 0.3788  | 0.2095  | 0.0069  | -0.2708 | -0.3331 | -0.3288 | -0.5109 |
| PBANKA_100470 | -0.0877 | 0.395   | -0.3268 | -0.221  | 0.0286  | -0.3138 | 0.3537  | 0.224   | 0.3239  | 0.1415  | -0.4812 | -0.7683 |
| PBANKA_060910 | 0.0741  | 0.2836  | -0.3318 | -0.2896 | -0.3945 | -0.3402 | -0.371  | -0.218  | 0.2105  | 0.7638  | 0.9957  | 1.2141  |
| PBANKA_040260 | -0.3403 | 0.9593  | 0.107   | 0.4712  | -0.2714 | -0.3037 | -0.5091 | -0.4068 | -0.5348 | -0.7256 | -0.3796 | -0.4686 |
| PBANKA_010880 | -3.226  | -2.2835 | -2.2734 | -0.4616 | -0.1719 | -0.1471 | 0.68    | 0.6194  | 0.9791  | 0.9735  | 0.3004  | -1.4755 |
| PBANKA_051210 | 0.3371  | 0.4497  | 0.7243  | -0.2521 | -0.0054 | 0.7174  | 0.107   | -0.5649 | -0.4084 | -0.0777 | -0.5644 | -0.2877 |
| PBANKA_061610 | 0.1085  | -0.2706 | 0.4135  | 0.3263  | 0.3578  | 0.2847  | 0.1156  | -0.2531 | -0.7075 | -0.5237 | -1.1696 | -1.0056 |
| PBANKA_140400 | 0.0905  | -0.1385 | 0.2573  | 0.2218  | 0.336   | -0.3055 | 0.0915  | -0.4021 | -0.364  | -0.8509 | -0.6099 | -0.5639 |
| PBANKA_011060 | -0.6523 | -0.3739 | -0.336  | -0.2333 | 0.1289  | -0.1819 | 0.3418  | 0.4781  | 0.5306  | 0.3734  | 0.3833  | 0.0048  |
| PBANKA_040830 | 0.5329  | 0.5611  | 0.2135  | 0.0578  | 0.2127  | -0.2128 | -0.2758 | 0.0788  | 0.2527  | 0.5459  | 0.5583  | 0.3673  |
| PBANKA_092740 | -0.2119 | 0.5057  | 0.3154  | 0.178   | 0.3577  | 0.4188  | 0.2905  | 0.2857  | 0.5447  | 0.2598  | 0.094   | 0.5069  |

|               |         |         |         |         |         |         |         |         |         |         |         |         |
|---------------|---------|---------|---------|---------|---------|---------|---------|---------|---------|---------|---------|---------|
| PBANKA_144710 | -0.1934 | -0.205  | 0.0349  | -0.1284 | -0.0535 | 0.0959  | 0.3048  | 0.1713  | 0.2087  | -0.0595 | 0.3407  | 0.184   |
| PBANKA_114510 | 0.1331  | 0.5125  | 0.1101  | 0.1333  | 0.2326  | 0.2491  | 0.0904  | 0.0426  | -0.0667 | -0.0143 | 0.1868  | 0.2544  |
| PBANKA_140630 | 0.4559  | -1.5512 | -0.1861 | -3.2325 | -1.2026 | -0.241  | -0.6724 | -2.009  | 0.0445  | -0.0208 | -1.0067 | -0.4928 |
| PBANKA_020510 | 0.1555  | 0.6216  | 0.1357  | 0.1466  | -0.0468 | 0.368   | -0.0102 | 0.0347  | 0.3402  | 0.2857  | 0.6758  | 1.5447  |
| PBANKA_143920 | 0.1367  | 0.8934  | -0.008  | -0.7462 | -0.6404 | -0.9855 | -0.9052 | -0.4636 | -0.0453 | 0.6562  | 1.2647  | 1.37    |
| PBANKA_121070 | -0.4965 | -1.0043 | -0.1709 | 0.1939  | 0.3297  | 0.3663  | 0.4091  | -0.0064 | -0.0059 | -0.341  | -0.9902 | -1.2227 |
| PBANKA_130910 | -0.1742 | -0.1477 | -0.2205 | -0.9277 | 0.2398  | -0.5161 | 0.0594  | -0.2354 | -0.1994 | -0.5899 | 0.0327  | -0.5337 |
| PBANKA_060560 | -0.0756 | -0.2633 | -0.192  | -0.0571 | -0.0014 | -0.22   | 0.0958  | 0.296   | 0.6119  | 0.6493  | 0.2362  | -0.0875 |
| PBANKA_100610 | -0.9596 | -0.7655 | -0.7527 | -0.276  | 0.0659  | 0.2233  | 0.6369  | 0.3659  | 0.6423  | 0.3164  | -0.203  | -0.7198 |
| PBANKA_081140 | 0.0475  | 0.3999  | -0.326  | -0.2064 | -0.2365 | -0.1446 | -0.4766 | -0.0649 | 0.2805  | 0.7696  | 1.5603  | 1.3469  |
| PBANKA_011140 | -0.1189 | -0.4961 | 0.0859  | 0.289   | 0.2155  | 0.2902  | 0.4186  | 0.003   | 0.4356  | -0.2597 | -0.6638 | -0.2183 |
| PBANKA_040300 | 0.6063  | 0.3136  | 0.49    | 0.5188  | 0.1852  | 0.267   | 0.1474  | -0.2587 | -0.7337 | -1.0521 | -1.0067 | -0.9928 |
| PBANKA_083190 | 0.467   | -0.3862 | 0.0195  | -0.054  | 0.1329  | 0.0616  | -0.1416 | 0.0541  | 0.2933  | 0.5628  | 0.6703  | 1.0824  |
| PBANKA_092350 | 0.3944  | 0.3973  | -0.032  | 0.1854  | -0.5116 | -0.165  | -0.2618 | -0.0392 | 0.1859  | 0.1823  | 0.6874  | 1.6418  |
| PBANKA_070470 | -0.0087 | -1.5812 | -0.3298 | -0.1916 | -0.8646 | -0.5706 | 0.1067  | 0.2534  | 1.0905  | 1.0792  | 1.3156  | 0.9115  |
| PBANKA_080540 | 0.0271  | -0.0315 | -0.0491 | -0.0769 | -0.0121 | 0.2883  | -0.0585 | -0.1458 | -0.1055 | -0.4634 | -0.2579 | -0.1234 |
| PBANKA_120970 | -0.7568 | -0.822  | -0.2984 | 0.1081  | -0.0021 | 0.1521  | 0.4257  | 0.6462  | 0.7706  | 0.6306  | 0.5782  | 0.2856  |
| PBANKA_083370 | -0.1005 | 0.4684  | 0.078   | -0.0969 | 0.0347  | -0.6611 | 0.0612  | -0.2577 | -0.0225 | -0.0831 | -0.2467 | -0.0055 |
| PBANKA_112070 | 0.4924  | 0.1839  | 0.5393  | 0.6191  | 0.3922  | 0.1326  | -0.645  | -1.4659 | -1.6559 | -2.1232 | -1.1354 | -0.768  |
| PBANKA_146200 | 0.6527  | 0.3361  | 0.299   | 0.2705  | 0.4955  | -0.0044 | -0.6836 | -0.3262 | -0.5248 | -0.3167 | 0.4569  | 0.7788  |
| PBANKA_144300 | -0.2717 | -0.3661 | 0.0009  | -0.2937 | 0.3653  | -0.1665 | 0.0998  | 0.3437  | 0.2439  | 0.3369  | 0.5244  | -0.1815 |
| PBANKA_146140 | 0.0714  | 0.0169  | -0.1774 | -0.2468 | -0.1846 | -0.123  | -0.1675 | -0.2547 | 0.0257  | -0.1395 | 0.2928  | 0.0517  |
| PBANKA_100050 | -0.0569 | 0.6045  | 0.4274  | 0.3967  | 0.0406  | 0.2832  | -0.0404 | -0.1968 | -0.0096 | 0.1612  | 0.7648  | 0.9061  |
| PBANKA_082260 | 0.1411  | 0.2909  | -0.0209 | -0.1244 | 0.0797  | 0.0158  | -0.5698 | -0.5522 | -0.2836 | -0.2276 | -0.8482 | -0.1718 |
| PBANKA_113350 | -0.0729 | 0.2961  | 0.1677  | 0.1137  | -0.0022 | 0.0229  | 0.0036  | 0.0414  | 0.0085  | -0.0748 | -0.1084 | -0.7498 |
| PBANKA_120840 | -0.3809 | -0.2792 | 0.1267  | 0.2873  | 0.287   | 0.7398  | -0.0502 | -0.197  | -0.0937 | -0.3167 | -0.3474 | -0.3744 |
| PBANKA_061360 | -0.0151 | 1.126   | 0.0737  | 0.1364  | 0.1749  | 0.025   | 0.0094  | -0.1237 | -0.3005 | -0.435  | -0.3769 | 0.4005  |
| PBANKA_132540 | 0.064   | -0.5882 | -0.2736 | 0.175   | -0.0152 | -0.0406 | -0.1048 | -0.0435 | 0.4172  | 0.3193  | 1.0317  | 1.561   |
| PBANKA_102760 | -0.117  | -0.7171 | -0.1118 | -0.3806 | 0.0491  | 0.4172  | 0.2319  | 0.2681  | 0.2232  | 0.1937  | 0.2882  | 0.094   |
| PBANKA_134260 | -0.1939 | -0.6298 | -0.2174 | 0.7882  | 0.2495  | 0.9431  | 0.4105  | 0.583   | 0.7748  | 0.183   | -0.362  | -1.1476 |
| PBANKA_101390 | -0.1489 | 0.2763  | -0.0986 | 0.1616  | -0.1983 | -0.753  | 0.1278  | 0.4708  | 0.991   | 0.8829  | 0.1433  | 1.9466  |
| PBANKA_080410 | 0.2806  | 1.4843  | 0.1379  | 0.1618  | -0.1052 | -0.2127 | -0.4959 | -0.843  | -0.4671 | -0.2243 | 0.9876  | 0.8382  |
| PBANKA_133900 | 0.0368  | 0.5241  | 0.0236  | 0.2737  | 0.0305  | -0.5415 | -0.1151 | -0.0113 | 0.0801  | 0.3037  | 1.1077  | 1.3214  |
| PBANKA_121540 | 0.3923  | -0.1995 | 0.3261  | 0.2603  | 0.3108  | 0.3544  | 0.3167  | 0.4229  | 0.3455  | 0.1686  | -0.4801 | -0.3212 |
| PBANKA_082290 | -0.0269 | -0.8281 | 0.1734  | -0.0451 | 0.5119  | -2.9203 | 0.3272  | 0.2118  | 0.333   | 0.125   | -0.1679 | 1.2283  |
| PBANKA_040500 | -0.4928 | -0.3293 | -0.1859 | 0.1801  | 0.109   | 0.436   | 0.1783  | -0.0415 | 0.0931  | -0.3118 | -0.4339 | -1.0722 |
| PBANKA_100780 | 0.1114  | 0.0282  | -0.1832 | 0.4636  | -0.123  | 0.2922  | -0.0288 | -0.4018 | -0.4206 | -0.6622 | -0.3563 | -0.8869 |
| PBANKA_130840 | -0.6779 | -0.5002 | -0.1549 | 0.0759  | -0.1087 | 0.1698  | 0.2192  | 0.2554  | 0.0538  | 0.0217  | 0.1215  | -0.7777 |
| PBANKA_051510 | -0.3344 | -0.4722 | 0.03    | 0.2647  | 0.2896  | 0.7931  | 0.3516  | 1.0295  | 0.633   | 0.3957  | -0.3018 | 0.0702  |
| PBANKA_142200 | -0.3029 | -0.0117 | 0.321   | 0.1118  | -0.198  | 0.4467  | 0.1999  | -0.2488 | -0.4139 | -0.4578 | -0.6587 | -0.586  |
| PBANKA_083460 | 0.0542  | 0.5642  | 0.0113  | 0.0874  | 0.1184  | -0.1025 | -0.2386 | 0.1776  | 0.2195  | 0.0587  | 0.1429  | -0.0256 |
| PBANKA_011010 | 0.0435  | 0.4732  | 0.0392  | -0.1294 | 0.0135  | -0.292  | 0.2079  | 0.2654  | 0.2753  | 0.1925  | 1.0929  | 0.2207  |
| PBANKA_145680 | -1.5591 | -1.5606 | -1.2467 | -0.4432 | -0.4953 | 0.2913  | 0.2932  | 0.4416  | 0.3744  | 0.4524  | -0.3941 | -0.5946 |
| PBANKA_101130 | 0.0145  | -0.4343 | 0.0628  | 0.2777  | 0.1142  | 0.2072  | 0.0614  | -0.5729 | -0.9101 | -1.6544 | -1.7699 | -1.6462 |
| PBANKA_110580 | -0.1005 | -0.6165 | -0.8757 | -0.8063 | -0.6362 | -0.8101 | -0.8956 | 0.079   | -0.651  | -0.2048 | -0.5686 | 1.1585  |
| PBANKA_090990 | 0.2021  | 0.1699  | 0.1338  | 0.0036  | -0.0043 | 0.0584  | 0.0776  | 0.0761  | -0.0734 | -0.1061 | -0.4325 | -0.2415 |
| PBANKA_050880 | 0.0825  | -0.0887 | 0.2119  | 0.4093  | -2.1901 | -0.9925 | 0.2183  | 0.0029  | -0.1289 | -0.5681 | -0.2716 | -0.1914 |
| PBANKA_124370 | 0.3048  | 0.0789  | 0.0718  | -0.0058 | 0.3897  | 0.1406  | -0.0752 | -0.4463 | -1.1033 | -0.8636 | -1.3236 | -1.0359 |
| PBANKA_123770 | -0.0641 | 0.5603  | 0.153   | 0.4023  | 0.6422  | -0.2183 | -0.0034 | -0.238  | 0.1309  | 0.1315  | -0.2861 | 0.1459  |
| PBANKA_130730 | -0.8591 | -0.8749 | -0.2146 | -0.3685 | -0.2963 | 0.3957  | 0.373   | 0.1455  | -0.4231 | -0.4824 | -0.2614 | -0.1871 |
| PBANKA_040870 | -0.0333 | 0.0009  | -0.2778 | 0.0682  | 0.1949  | 0.6005  | 0.2643  | -0.5    | -0.058  | 0.0656  | -0.725  | -0.2227 |
| PBANKA_123390 | -0.3493 | -0.1486 | 0.0636  | 0.2637  | 0.2318  | 0.1193  | 0.1645  | -0.2334 | -0.6793 | -1.1788 | -1.2816 | -1.5428 |
| PBANKA_111330 | -0.4789 | -0.8964 | -0.4491 | -0.4887 | -0.5442 | 0.2424  | 0.3915  | 0.3727  | 0.1908  | 0.0998  | 0.0831  | -0.585  |
| PBANKA_134420 | -0.3461 | 0.094   | -0.4558 | -0.0851 | -0.2633 | -0.5037 | -0.1913 | 0.1366  | 0.6507  | 0.6575  | 1.6663  | 0.8955  |
| PBANKA_110430 | 0.4195  | 0.224   | 0.1083  | 0.4192  | 0.1763  | 0.2166  | -0.0283 | -0.0773 | -0.3252 | -0.4295 | -0.4429 | -0.3315 |
| PBANKA_120540 | -0.359  | -0.341  | -0.4531 | -0.2585 | 0.0396  | 0.3375  | 0.0266  | 0.1402  | -0.0549 | 0.1376  | -0.1862 | -0.2398 |
| PBANKA_121220 | -0.994  | -0.7609 | -0.7941 | -0.7664 | 0.1854  | 0.6196  | -0.1448 | 0.3846  | 0.8375  | 1.0228  | 0.7937  | 0.2467  |
| PBANKA_110330 | -0.4463 | -0.1309 | -0.2997 | -0.5985 | -0.3392 | -0.6298 | -0.868  | 0.1119  | 0.2475  | 0.495   | 1.218   | 0.6562  |
| PBANKA_144010 | 0.141   | 0.0741  | -0.001  | -0.1964 | -0.2808 | -0.2767 | -0.5288 | -0.0901 | 0.1142  | 0.4288  | 1.133   | 1.4648  |
| PBANKA_140550 | 0.3132  | -0.4621 | 0.0931  | -0.0024 | 0.1696  | 0.5423  | -0.0978 | -0.3041 | -0.3195 | -0.6867 | -0.516  | 0.1653  |
| PBANKA_081200 | -0.8939 | -0.6185 | -0.8989 | -1.1693 | -0.4502 | 0.3369  | -0.0315 | -0.2924 | -0.2058 | -0.1291 | -0.7221 | -0.2876 |
| PBANKA_133490 | -0.0503 | 0.234   | -0.1022 | 0.1611  | -0.0378 | -0.2769 | -0.1243 | -0.2663 | 0.4811  | 0.5501  | 0.9228  | 1.1577  |
| PBANKA_120780 | -0.4418 | 0.1773  | -0.4249 | 0.0214  | 0.0122  | 0.1624  | 0.122   | -0.1652 | 0.1561  | 0.2594  | -0.1962 | 0.202   |

|               |         |         |         |         |         |         |         |         |         |         |         |         |
|---------------|---------|---------|---------|---------|---------|---------|---------|---------|---------|---------|---------|---------|
| PBANKA_136510 | 0.6423  | 0.7353  | 0.0534  | -1.0685 | 0.1226  | -0.0901 | 0.2656  | -0.2315 | -0.4308 | 0.0338  | 0.4988  | -0.2985 |
| PBANKA_142350 | 0.4931  | 0.7316  | 0.7805  | 0.3707  | 0.6997  | 0.3691  | -0.381  | -0.8879 | -0.7968 | -2.3019 | -0.5521 | -1.0424 |
| PBANKA_080510 | 0.3764  | 0.1416  | 0.1468  | 0.1714  | -0.0046 | 0.1668  | -0.2548 | -0.4049 | 0.2078  | 0.2931  | 0.7587  | 1.3055  |
| PBANKA_135140 | -0.3901 | -0.2873 | -0.5834 | -0.2918 | -0.8422 | -0.5207 | 0.235   | 0.5972  | 0.8267  | 0.9634  | 0.7371  | 0.4811  |
| PBANKA_135240 | -0.3782 | -0.2707 | -0.3291 | -0.0992 | -0.0472 | 0.2486  | 0.324   | 0.3628  | 0.322   | 0.4404  | 0.0501  | 0.1871  |
| PBANKA_010970 | -0.1879 | 0.1351  | -0.0393 | 0.2725  | -0.1076 | 0.4325  | 0.1141  | -0.0023 | -0.1924 | -0.1158 | 0.148   | 0.2107  |
| PBANKA_102170 | 0.6383  | 0.3033  | 0.2407  | 0.3829  | -0.3695 | 0.4845  | -0.1928 | -0.1062 | 0.2493  | -0.1406 | -0.8107 | -0.387  |
| PBANKA_091700 | 0.4107  | 0.1929  | 0.1352  | -0.1168 | 0.1188  | 0.4219  | -0.1159 | 0.1448  | 0.0721  | -0.0289 | -0.6039 | 0.0586  |
| PBANKA_113060 | -0.2624 | 0.2207  | 0.0091  | 0.5347  | 0.0987  | 0.4718  | 0.4903  | -0.0638 | 0.0984  | 0.0179  | 0.0468  | -0.228  |
| PBANKA_091320 | 0.3728  | -0.0787 | -0.0819 | 0.0917  | -0.1153 | 0.6135  | 0.306   | -0.2522 | -0.1046 | -0.3953 | -0.6863 | -0.1104 |
| PBANKA_102650 | 0.2455  | 1.446   | 0.1612  | 0.0498  | -0.401  | -0.072  | 0.0406  | -0.5279 | 0.4038  | 0.215   | 0.348   | -0.0802 |
| PBANKA_145700 | -0.5696 | -0.1452 | -0.3926 | -0.2821 | -0.3479 | 0.4861  | 0.1132  | 0.095   | 0.6764  | 0.6258  | 0.2134  | 0.5865  |
| PBANKA_142760 | 0.055   | -0.3972 | -0.7617 | -0.3023 | -0.1839 | -1.092  | -0.6239 | -0.3906 | -0.1462 | 0.1032  | -0.7037 | -0.2595 |
| PBANKA_070260 | -0.0446 | 0.23    | 0.0776  | 0.2368  | 0.0151  | -0.24   | 0.2594  | 0.1429  | 0.4195  | 0.2045  | 0.0376  | -0.3618 |
| PBANKA_051360 | 0.2591  | -0.2114 | 0.4971  | 0.4616  | 0.2457  | 0.1446  | -0.0508 | -0.6818 | -1.2419 | -2.0352 | -2.0175 | -1.8097 |
| PBANKA_121760 | -1.3656 | -0.8431 | -0.8185 | -0.9421 | -0.1996 | -0.0317 | 0.6477  | 0.8014  | 0.8643  | 0.9684  | 0.0892  | -0.5706 |
| PBANKA_140350 | -0.2986 | -0.4622 | -0.1022 | -0.2188 | -0.2619 | 0.5476  | 0.4589  | 0.5065  | 0.2408  | 0.1718  | -0.3459 | -0.3873 |
| PBANKA_140970 | -0.2377 | -0.5335 | -0.6159 | -0.4034 | -0.3435 | -0.118  | -0.2128 | 0.0647  | 0.6932  | 0.1607  | 0.554   | 0.8575  |
| PBANKA_144160 | -0.1734 | -0.0102 | 0.2937  | 0.494   | 0.3935  | 0.6013  | 0.2265  | 0.101   | 0.0769  | -0.2209 | -0.4502 | -0.1443 |
| PBANKA_093910 | -0.5677 | 0.4586  | -0.4283 | -0.492  | -0.5463 | -0.4636 | -0.0744 | 0.2541  | 0.7368  | 1.0505  | 1.3853  | 1.5348  |
| PBANKA_052250 | 0.3224  | 0.4846  | 0.3694  | 0.0776  | 0.6437  | 0.9127  | 0.2014  | 0.0755  | -0.1487 | -0.1438 | -0.3387 | 0.1232  |
| PBANKA_113160 | -0.3764 | 0.7513  | -0.445  | -0.5331 | 0.2672  | 0.0191  | 0.0583  | 0.1025  | -0.1344 | 0.1499  | 0.4657  | -0.2307 |
| PBANKA_112140 | 0.3189  | 0.6014  | 0.2092  | 0.0097  | 0.2695  | 0.1806  | 0.0901  | -0.156  | -0.0155 | -0.1159 | 0.0022  | 0.0494  |
| PBANKA_122580 | -0.2392 | -0.3524 | -0.0046 | -0.0448 | 0.1947  | 0.0469  | 0.3093  | 0.0531  | -0.1901 | -0.4914 | -0.8873 | -0.573  |
| PBANKA_145940 | 0.2088  | 0.0525  | 0.0068  | -0.2516 | -0.2252 | -0.2115 | -0.3628 | -0.2898 | 0.3018  | 0.6338  | 0.3788  | 0.3367  |
| PBANKA_135990 | -0.2667 | -0.1323 | -0.1945 | 0.1352  | 0.1417  | 0.2826  | 0.0997  | -0.0216 | -0.2279 | -0.0511 | -0.4964 | -0.1038 |
| PBANKA_081410 | 0.3422  | 0.0777  | 0.6296  | 0.1695  | 0.3229  | -0.292  | -0.1142 | -0.4266 | -0.5707 | -0.8813 | -0.6116 | -0.2184 |
| PBANKA_120140 | 1.1464  | -0.4167 | -0.0103 | -0.0399 | -0.0411 | 0.262   | 0.2057  | 0.0593  | 0.4433  | 0.1367  | -0.1687 | -2.1612 |
| PBANKA_080940 | -0.4962 | -0.3204 | -0.7308 | -0.7938 | -0.0705 | 0.3731  | 0.3203  | 0.4225  | 0.4698  | 0.5345  | -0.1528 | -0.0501 |
| PBANKA_060670 | -0.334  | -0.8178 | -0.1736 | -0.0459 | 0.2248  | 0.2227  | 0.1155  | -0.6448 | -0.7331 | 0.0073  | -0.6728 | -0.4294 |
| PBANKA_103480 | -0.2547 | 0.7038  | 0.0116  | 0.3122  | -0.2797 | 0.3715  | 0.4503  | 0.6511  | 0.0945  | 0.1681  | 0.1083  | -0.1685 |
| PBANKA_121440 | -0.1007 | 0.3821  | -0.393  | 0.2585  | -0.0847 | -0.17   | 0.2335  | 0.2083  | 0.3983  | 0.7928  | -0.0795 | 0.2737  |
| PBANKA_134810 | 0.264   | -0.0091 | 0.0745  | 0.3227  | 0.2153  | 0.233   | 0.0296  | -0.6684 | -0.6078 | -0.8539 | -0.9616 | -1.1205 |
| PBANKA_031450 | 0.2087  | 0.1824  | 0.3478  | 0.3966  | 0.2061  | 0.0177  | -0.3306 | -0.6912 | -1.0168 | -1.8442 | -0.8932 | -0.2184 |
| PBANKA_041720 | -0.3745 | -0.1851 | -0.9076 | -1.0069 | -0.6748 | 0.5062  | -0.6595 | -0.0806 | 0.2925  | 0.6105  | 0.9207  | 1.6966  |
| PBANKA_041200 | -0.3958 | 0.3533  | 0.0583  | -0.0968 | 0.0417  | 0.3029  | 0.1463  | 0.0746  | -0.1659 | -0.1067 | -0.4441 | -0.6481 |
| PBANKA_082690 | -0.3959 | -1.2241 | -1.407  | -0.8205 | -0.3189 | -0.5307 | -1.1314 | -0.8481 | -1.2283 | -1.4571 | -1.1049 | -0.363  |
| PBANKA_091340 | -0.4011 | -0.3036 | -0.4125 | -0.277  | -0.3497 | -0.4975 | -0.3089 | -0.0638 | 0.5013  | 0.9695  | 1.2903  | 1.5519  |
| PBANKA_120150 | -0.3392 | -0.2629 | -0.0959 | -0.1117 | 0.0191  | -0.0816 | -0.3983 | -0.3616 | -0.3785 | -0.4187 | -0.1717 | -1.0347 |
| PBANKA_141180 | 0.6444  | 0.4439  | 0.671   | 0.2759  | 0.1664  | 0.1874  | -0.3336 | -0.8041 | -0.9806 | -1.0452 | -1.0243 | -1.264  |
| PBANKA_132430 | -1.103  | -0.5836 | -1.0901 | -0.9115 | -0.6112 | -0.5205 | -0.0391 | 0.2476  | 0.7309  | 1.1012  | 0.645   | 0.2997  |
| PBANKA_083170 | 0.1552  | 0.12    | 0.0544  | 0.2696  | 0.1495  | 0.2739  | -0.1566 | 0.2075  | 0.1429  | 0.0375  | -0.4838 | 0.5686  |
| PBANKA_146310 | -0.132  | 0.1632  | -0.3851 | -0.0332 | -0.3079 | 0.2564  | -0.0644 | 0.2609  | -0.0133 | -0.0943 | -0.014  | -0.3702 |
| PBANKA_071240 | 0.5204  | -0.2138 | -0.018  | 0.3435  | -0.1602 | 0.1045  | -0.1307 | 0.1639  | 0.6106  | 0.3212  | 0.7974  | 1.1656  |
| PBANKA_010540 | 0.1017  | 0.6007  | 0.0392  | -0.0709 | -0.0214 | 0.1426  | -0.1282 | 0.081   | -0.2183 | 0.0695  | -0.2243 | -0.2863 |
| PBANKA_101310 | 0.4155  | 0.285   | 0.2452  | 0.5218  | 0.2019  | 0.0334  | -0.2629 | -0.8788 | -1.1318 | -1.8058 | -0.9649 | -0.6994 |
| PBANKA_130340 | -0.0334 | 0.0681  | 0.285   | 0.0254  | 0.407   | 0.5263  | 0.2493  | 0.2755  | 0.1947  | -0.0943 | 0.2743  | -0.2087 |
| PBANKA_052270 | -1.5271 | -0.4944 | -0.7783 | -0.5548 | -0.0503 | -0.0947 | 0.0667  | 0.4476  | 0.2538  | 0.5417  | 0.1927  | 0.4032  |
| PBANKA_124250 | 0.4027  | 0.5746  | 0.4836  | -0.0266 | 0.2857  | 0.0009  | -0.0449 | -0.0626 | -0.2314 | -0.3536 | -0.4404 | 0.0798  |
| PBANKA_131040 | -1.6261 | -1.2759 | -0.8665 | -0.4679 | 0.0084  | -0.0698 | 0.5941  | 0.7752  | 0.7882  | 0.7708  | -0.1888 | -0.4074 |
| PBANKA_030920 | 0.0144  | -0.254  | -0.0933 | -0.2182 | -0.0132 | 0.1554  | 0.2437  | 0.307   | -0.0023 | -0.0836 | 0.14    | -0.5963 |
| PBANKA_143800 | -0.6586 | -0.4304 | -1.1025 | -0.5129 | -0.4364 | -0.1566 | 0.1722  | 0.2509  | -0.3077 | 0.2806  | -0.0075 | -0.1182 |
| PBANKA_140890 | 0.0678  | 0.5564  | 0.1638  | 0.1663  | 0.225   | 0.3215  | -0.2436 | 0.0794  | -0.1792 | -0.137  | -0.4485 | -0.5736 |
| PBANKA_040590 | -0.6224 | -0.4308 | -0.1581 | 0.0157  | 0.0155  | 0.8411  | 0.3878  | 0.2399  | 0.1764  | -0.0698 | -0.6381 | -0.4255 |
| PBANKA_114270 | -0.4395 | -0.022  | -0.156  | -0.1941 | -0.1691 | -0.6468 | 0.1669  | 0.0117  | 0.0294  | 0.1989  | -0.6314 | 0.5944  |
| PBANKA_080160 | 0.137   | 0.6282  | 0.1893  | -0.432  | -0.0599 | -0.473  | -0.1372 | -0.4573 | -0.1651 | 0.0315  | 0.3086  | 0.7047  |
| PBANKA_110930 | 0.2334  | -0.5148 | 0.1714  | 0.2656  | -0.2531 | 0.3118  | 0.4001  | 0.2604  | 0.0687  | 0.2762  | 0.6982  | 1.0076  |
| PBANKA_141600 | -0.169  | -0.3665 | -0.0797 | 0.3598  | 0.3458  | 0.5684  | 0.5027  | 0.4117  | 0.1071  | -0.1517 | -0.9794 | -0.7253 |
| PBANKA_090890 | -0.1021 | 0.2077  | -0.1998 | -0.087  | 0.2932  | 0.0614  | -0.5252 | -0.3714 | -0.5402 | -0.776  | -0.2167 | -0.2294 |
| PBANKA_071090 | -0.6627 | -0.6963 | -0.2073 | 0.2854  | 0.2848  | 0.5853  | 0.1818  | -0.1737 | -0.4032 | -1.056  | -1.5302 | -1.4201 |
| PBANKA_094070 | 0.1704  | 0.0144  | 0.1769  | 0.3506  | 0.1726  | 0.5663  | -0.1379 | -0.1162 | -0.1733 | -0.3602 | -0.2944 | 0.0486  |
| PBANKA_132570 | 0.3083  | 0.8215  | -0.0952 | -0.1505 | 0.1761  | -0.4051 | -0.2797 | 0.0496  | 0.355   | 0.1302  | -0.2862 | 0.8972  |
| PBANKA_051040 | 0.5408  | -0.0534 | 0.1283  | -0.1124 | 0.0603  | 0.5656  | -0.157  | -0.5568 | -0.6659 | -0.8133 | -0.9653 | -0.1381 |

|               |         |         |         |         |         |         |         |         |         |         |         |         |
|---------------|---------|---------|---------|---------|---------|---------|---------|---------|---------|---------|---------|---------|
| PBANKA_141060 | -0.5238 | -0.2573 | -0.5834 | -0.2668 | -0.1905 | -0.1271 | 0.2573  | 0.492   | 0.3504  | 0.4673  | -0.8836 | -0.3644 |
| PBANKA_132370 | 0.3051  | 0.2933  | 0.0677  | 0.3642  | -0.1604 | -0.235  | -0.4889 | -0.1784 | 0.4011  | 0.4329  | 0.671   | 1.0285  |
| PBANKA_010700 | -0.4715 | -0.4635 | -0.2575 | -0.1355 | 0.2018  | 0.3913  | 0.429   | 0.3767  | 0.4231  | -0.097  | 0.4357  | -0.8354 |
| PBANKA_100360 | -1.2046 | -0.6926 | -0.6569 | -0.3713 | -0.2048 | -0.0535 | 0.5725  | 0.881   | 1.2936  | 1.6815  | 0.731   | 0.2085  |
| PBANKA_091530 | 0.273   | -0.0752 | -0.4779 | -0.4451 | -0.5776 | -0.895  | -0.9404 | -0.5428 | 0.5149  | 0.7121  | 1.3182  | 0.7839  |
| PBANKA_020730 | -0.5894 | -0.4226 | -0.6432 | 0.4177  | -0.0302 | 0.3299  | 0.2764  | 0.6056  | 0.2672  | 0.3772  | 0.1268  | -0.6218 |
| PBANKA_114340 | -0.1678 | 0.4758  | -0.3159 | -0.2108 | -0.2996 | -0.1888 | -0.1465 | -0.018  | -0.1347 | 0.2912  | 0.5389  | 0.5537  |
| PBANKA_050940 | 0.0391  | 0.1644  | 0.0879  | -0.3545 | 0.1025  | -0.231  | -0.0688 | -0.4552 | -0.47   | -0.7285 | -0.6178 | -0.8401 |
| PBANKA_050900 | 0.2749  | 0.9816  | 0.2437  | -0.081  | 0.0302  | -0.2991 | -0.2957 | -0.3238 | -0.3987 | -0.1505 | 0.7881  | 0.934   |
| PBANKA_081950 | -0.06   | 0.6514  | -0.2941 | 0.3037  | 0.1778  | 0.2276  | 0.3949  | 0.4835  | 0.476   | 0.4272  | -0.4666 | -0.3203 |
| PBANKA_131610 | -0.131  | 0.1077  | -0.1408 | 0.0265  | -0.0258 | 0.0087  | -0.1466 | -0.4515 | -0.2784 | 0.0083  | 0.6285  | 0.6318  |
| PBANKA_090100 | 0.4132  | 0.0787  | 0.5757  | 0.5543  | 0.518   | 0.3825  | -0.5957 | 0.3305  | 0.1262  | -0.6955 | -0.8224 | -0.0103 |
| PBANKA_130330 | -0.6968 | -0.5767 | -0.3509 | -0.0669 | 0.0811  | 0.2964  | 0.1017  | 0.2345  | 0.0882  | 0.2596  | -0.4176 | -0.8235 |
| PBANKA_041620 | 0.4278  | 0.4327  | 0.0046  | -0.2754 | -0.3605 | -0.13   | -0.3173 | -0.4165 | 0.1556  | 0.503   | 0.8579  | 0.5226  |
| PBANKA_111110 | 0.3049  | 0.0094  | -0.3064 | -0.1401 | -0.2375 | 0.0006  | 0.0384  | 0.1116  | 0.385   | 0.6345  | 1.0219  | 0.2787  |
| PBANKA_144280 | -0.187  | -0.423  | -0.0342 | 0.0396  | 0.1724  | 0.391   | 0.2883  | 0.006   | -0.0038 | -0.2934 | -0.701  | -0.1956 |
| PBANKA_050920 | 0.4197  | 0.0238  | 0.1956  | 0.2664  | 0.1554  | 0.3958  | -0.0564 | 0.1695  | 0.2215  | 0.1817  | -0.1141 | 0.2236  |
| PBANKA_131210 | 0.2247  | 0.457   | 0.0946  | -0.5222 | 0.4656  | 0.3994  | 0.2172  | 0.5757  | 0.7136  | 0.6646  | 0.5353  | 0.9803  |
| PBANKA_141590 | 0.8017  | -0.4958 | 0.4746  | 0.3474  | 0.5178  | 0.2533  | -0.2521 | -1.1429 | -1.4792 | -1.7101 | -1.8034 | -1.4606 |
| PBANKA_101350 | 0.3395  | -0.1143 | 0.5492  | 0.4198  | 0.3198  | -0.2204 | 0.0795  | -0.1455 | -0.0022 | 0.2088  | 0.4222  | 0.6546  |
| PBANKA_051890 | -0.7119 | -0.8993 | -0.5206 | 0.0775  | 0.0834  | 0.1767  | 0.7369  | 0.6135  | 0.1984  | 0.1633  | -0.7068 | -0.8151 |
| PBANKA_020830 | -0.0465 | 0.5688  | 0.3961  | -0.3845 | 0.256   | 0.299   | 0.1576  | -0.2083 | -0.3558 | -0.018  | 0.6763  | 0.1591  |
| PBANKA_062330 | 0.0779  | 0.5337  | -0.3088 | -0.2834 | -0.4556 | -0.4011 | -0.8332 | -0.4867 | 0.0876  | 0.483   | 0.9493  | 1.6962  |
| PBANKA_113250 | 0.371   | 0.3094  | 0.3825  | 0.3018  | 0.3154  | -0.4474 | -0.3406 | -0.7166 | -0.9177 | -1.1396 | -1.1545 | -0.9258 |
| PBANKA_134050 | 0.1687  | -0.6699 | 0.54    | 0.2919  | 0.4229  | 0.9069  | 0.2065  | 0.2924  | 0.0166  | 0.5336  | 0.0335  | 0.4024  |
| PBANKA_050640 | 0.0833  | 0.5042  | 0.0597  | -0.1459 | 0.2671  | 0.2287  | -0.0985 | 0.0616  | -0.1035 | -0.2213 | -0.2113 | -0.4203 |
| PBANKA_136040 | -0.5149 | -0.1197 | -0.2003 | 0.0144  | 0.2554  | 0.2441  | 0.2208  | 0.2979  | 0.5382  | 0.3368  | 0.565   | 1.2968  |
| PBANKA_122990 | -0.5246 | 0.0751  | -0.5692 | -0.5878 | -0.2015 | -0.5318 | -0.0339 | -0.2719 | 0.6587  | 0.5844  | 0.6476  | 0.8964  |
| PBANKA_143170 | 0.5457  | -0.1504 | 0.1396  | 0.2548  | 0.6718  | 0.4637  | 0.3706  | 0.1917  | -0.2658 | -0.955  | -0.7986 | -1.003  |
| PBANKA_142270 | 0.2047  | 0.1442  | 0.4649  | 0.6022  | 0.3585  | 0.4086  | -0.4283 | -1.2322 | -1.1137 | -1.801  | -1.4403 | -1.4476 |
| PBANKA_041710 | -0.0111 | -0.4665 | -0.1007 | -0.4939 | -0.1932 | -0.565  | 0.0585  | -0.0436 | 0.1011  | 0.2667  | 0.3245  | -0.3174 |
| PBANKA_101240 | 0.1545  | -0.0484 | -0.0362 | 0.123   | 0.2731  | 0.2399  | -0.1821 | 0.314   | 0.3886  | 0.3716  | 0.7287  | 0.7602  |
| PBANKA_092640 | 0.049   | 0.6408  | -0.2014 | 0.1904  | -0.1212 | 0.0089  | 0.1212  | 0.0022  | -0.2676 | -0.063  | 0.1469  | -0.0491 |
| PBANKA_011160 | -0.5482 | 0.0029  | -0.4869 | -0.1712 | -0.1891 | -0.0522 | 0.2132  | 0.4446  | 0.604   | 1.0432  | 0.7935  | 0.4059  |
| PBANKA_141030 | 0.4997  | 1.8541  | 0.7397  | 0.0376  | 0.2109  | 0.0272  | -0.4102 | -0.5769 | -0.6225 | -0.7473 | -0.239  | -0.7405 |
| PBANKA_146370 | 0.0825  | 0.3697  | 0.228   | 0.2551  | 0.0616  | 0.0821  | -0.456  | -0.4895 | -0.7362 | -0.8196 | -0.6398 | -0.6341 |
| PBANKA_082030 | -0.6494 | -1.0768 | -0.1543 | -0.276  | -0.058  | 0.1668  | -0.1083 | -0.213  | -0.5924 | -0.3368 | -0.1484 | -0.0139 |
| PBANKA_061020 | -1.1584 | -0.3031 | -0.2499 | -0.0483 | 0.149   | 0.7508  | 0.3058  | 0.4498  | 0.0677  | 0.0722  | 0.4191  | -0.0982 |
| PBANKA_071420 | 0.4534  | 0.1872  | 0.1196  | -0.543  | 0.1499  | 0.2281  | 0.1444  | -0.0151 | -1.2644 | -1.3184 | -0.439  | -1.216  |
| PBANKA_144230 | -0.5229 | -0.6342 | -0.3182 | -0.2476 | -0.0066 | 0.2892  | -0.0325 | 0.1746  | -0.19   | 0.1392  | 0.1386  | -0.3128 |
| PBANKA_091930 | 0.4804  | 0.6491  | 0.5674  | 0.4672  | -0.6405 | 0.0399  | -0.8538 | -1.2059 | -1.2513 | -1.1453 | -0.3955 | -0.2892 |
| PBANKA_040330 | 0.0771  | -0.0275 | 0.3081  | 0.6775  | 0.5993  | 0.3938  | 0.0988  | -0.129  | -0.0419 | -0.3081 | 0.0559  | -0.0367 |
| PBANKA_142850 | 0.0365  | 0.4027  | 0.2574  | 0.0451  | 0.2758  | 0.2485  | 0.0362  | -0.0597 | -0.2666 | 0.0802  | -0.5431 | 0.3904  |
| PBANKA_136520 | -0.5335 | 0.2499  | -0.3057 | -0.7864 | -0.0587 | -0.1219 | -0.3217 | 0.1601  | -0.2329 | 0.1414  | 0.2804  | -0.0475 |
| PBANKA_094210 | -0.092  | 0.5669  | 0.161   | 0.1337  | 0.4218  | -0.9088 | -0.0758 | 0.1536  | 0.0184  | -0.33   | -0.6328 | -0.0846 |
| PBANKA_102130 | 0.2568  | -0.4236 | 0.2747  | 0.8373  | 0.4039  | 0.5043  | 0.2591  | -0.1804 | 0.1044  | -0.6091 | -0.645  | -1.2451 |
| PBANKA_031420 | -1.8361 | -0.6202 | -1.2907 | -1.1326 | -0.457  | -0.12   | 0.028   | 0.8674  | 1.0052  | 1.3516  | 0.6572  | -0.3097 |
| PBANKA_143140 | -0.5595 | -0.1563 | -0.4081 | -0.5525 | -0.4141 | -0.3448 | -0.7037 | -0.0654 | 0.8954  | 1.2119  | 1.6741  | 0.8948  |
| PBANKA_145170 | 0.811   | 0.196   | 0.3008  | 0.1716  | 0.2122  | 0.1005  | -0.0949 | -0.0533 | 0.1736  | 0.253   | -0.0719 | -0.3457 |
| PBANKA_102360 | 0.026   | -0.2048 | -0.0351 | -0.0773 | 0.0759  | 0.363   | 0.3152  | 0.0891  | 0.1896  | 0.0478  | -0.5737 | -0.3894 |
| PBANKA_114120 | 0.3489  | 0.7146  | 0.3793  | 0.1509  | 0.2841  | 0.5066  | -0.2301 | -0.2368 | -0.1748 | -0.2705 | 0.1438  | 0.755   |
| PBANKA_124270 | 0.1793  | 0.5519  | 0.267   | 0.0604  | 0.1219  | 0.3845  | 0.2739  | 0.1801  | -0.0305 | 0.0229  | 0.131   | 0.2645  |
| PBANKA_142900 | 0.2559  | -0.2181 | 0.1525  | 0.5689  | 0.1579  | 0.2216  | -0.268  | -0.5902 | -0.738  | -0.9578 | -0.8453 | -0.4233 |
| PBANKA_093240 | 0.2263  | 0.4953  | 0.5415  | 0.3807  | 0.4488  | 0.0435  | -0.4813 | -1.204  | -1.3689 | -1.3982 | -0.4973 | -0.4634 |
| PBANKA_131110 | -0.6387 | -0.2848 | 0.0701  | -0.1482 | 0.2096  | 0.1905  | -0.2002 | -0.5946 | -1.0486 | -1.3604 | -0.974  | -1.0543 |
| PBANKA_100540 | -0.2689 | -0.0598 | -0.2257 | 0.0538  | -0.1993 | 0.5763  | 0.2065  | 0.4155  | 0.5996  | 0.6866  | 0.2619  | -0.1969 |
| PBANKA_030950 | -1.5127 | -1.163  | -1.5799 | -1.4404 | -0.9883 | -0.4793 | 0.2184  | 0.5161  | 1.2335  | 1.6975  | 1.5371  | 0.9905  |
| PBANKA_145530 | 0.1971  | 0.16    | -0.0952 | -0.1437 | -0.0368 | -0.1057 | 0.0997  | 0.1129  | 0.1409  | -0.1249 | -0.0191 | 0.6568  |
| PBANKA_093750 | -0.3292 | -0.1654 | -0.2645 | -0.1539 | -0.0632 | 0.0467  | 0.1392  | 0.3008  | 0.1399  | 0.4834  | -0.6282 | -0.3704 |
| PBANKA_081800 | -0.3349 | -0.3852 | -0.2807 | -0.044  | -0.0002 | 0.0954  | 0.2984  | 0.3206  | 0.4737  | 0.3491  | 0.0526  | -0.3284 |
| PBANKA_113100 | 0.1714  | -0.0146 | 0.2721  | 0.3361  | 0.3296  | 0.6996  | 0.2729  | 0.0982  | 0.015   | -0.1789 | -0.7723 | 0.3517  |
| PBANKA_071210 | -1.0955 | -0.7794 | -0.2919 | 0.0127  | 0.0587  | 0.3647  | 0.4292  | 0.9243  | 0.6209  | 0.3902  | -0.5047 | -0.5965 |
| PBANKA_101910 | -0.4058 | 0.1248  | -0.1872 | -0.2538 | 0.0245  | -0.3692 | 0.2805  | 0.2312  | 0.1543  | 0.142   | -0.2283 | -0.3378 |

|               |         |         |         |         |         |         |         |         |         |         |         |         |
|---------------|---------|---------|---------|---------|---------|---------|---------|---------|---------|---------|---------|---------|
| PBANKA_071230 | 0.0104  | 0.1977  | -0.1711 | -0.3305 | -0.5021 | -0.3419 | 0.0539  | 0.156   | 0.527   | 0.8     | 0.1275  | -0.2322 |
| PBANKA_143340 | 0.2796  | 0.2643  | -0.0431 | -0.0755 | -0.3117 | 0.1179  | -0.5412 | -0.426  | -0.0432 | 0.0738  | 0.4098  | 0.8267  |
| PBANKA_136440 | -0.4249 | -0.5514 | 0.0061  | -0.3104 | -0.1129 | -0.4987 | -0.1552 | 0.7062  | 0.5261  | 0.6806  | 1.035   | 0.2543  |
| PBANKA_030560 | -0.2046 | -0.6733 | -0.8016 | -0.1019 | 0.225   | 0.0422  | 0.2197  | 0.0485  | -0.3671 | -0.7725 | -0.8089 | -1.1898 |
| PBANKA_142700 | 0.3346  | 0.4739  | -0.0517 | 0.2274  | 0.2102  | 0.1474  | -0.209  | -0.4531 | -0.7901 | -0.7817 | -0.7858 | -0.3601 |
| PBANKA_080580 | 0.3728  | 0.5963  | 0.3439  | -0.1202 | -0.3599 | -0.1963 | -0.3834 | 0.0067  | -0.7266 | -0.6562 | -0.7077 | -1.2199 |
| PBANKA_134530 | 0.1114  | -0.257  | 0.5323  | 0.5069  | 0.4471  | 0.0364  | 0.0653  | 0.0407  | -0.1019 | -0.4815 | -0.3552 | -0.8946 |
| PBANKA_120240 | 0.1135  | 0.0871  | 0.2346  | 0.1378  | 0.4332  | -0.2046 | -0.3621 | -0.5781 | -0.5828 | -1.2643 | -0.2851 | 0.1126  |
| PBANKA_061450 | 0.6778  | 0.4273  | 0.4479  | 0.1518  | 0.2192  | -0.1297 | -0.3127 | -0.6502 | -1.2933 | -0.7007 | -0.1114 | -0.4308 |
| PBANKA_062270 | 0.1844  | 0.1633  | 0.1747  | 0.4032  | 0.2317  | 0.2119  | 0.214   | 0.0613  | -0.2341 | -0.4738 | -1.3034 | -1.1235 |
| PBANKA_041500 | 0.0701  | 0.0081  | 0.216   | 0.1202  | 0.1328  | -0.5671 | 0.2629  | 0.0777  | 0.2294  | 0.0338  | -0.4205 | 0.0676  |
| PBANKA_130640 | 0.6234  | 0.4475  | 0.2514  | -0.173  | -0.0531 | 0.355   | -0.1237 | -0.2781 | -0.0728 | -0.124  | 0.0246  | 0.1308  |
| PBANKA_141110 | -0.6899 | -0.4088 | -0.2207 | -0.0226 | 0.0766  | -0.243  | 0.0788  | -0.1454 | -0.6051 | -0.1094 | -0.0079 | -0.2804 |
| PBANKA_081490 | 0.3742  | -0.0999 | 0.4557  | 0.5445  | 0.311   | -0.6569 | 0.1315  | 0.1983  | 0.0414  | -0.3709 | -0.5965 | -0.1811 |
| PBANKA_031120 | 0.4771  | 0.207   | -0.2388 | -0.0168 | -0.2768 | -0.2969 | -0.4286 | -0.0503 | 0.1832  | 0.5264  | 0.9255  | 1.5365  |
| PBANKA_131410 | 0.5021  | 0.2747  | 0.0955  | 0.1823  | 0.0493  | 0.1805  | -0.1143 | 0.0724  | -0.1554 | -0.2881 | -0.4608 | 0.1892  |
| PBANKA_030110 | -0.2293 | 0.1508  | 0.1155  | 0.0056  | -0.1208 | 0.0468  | -0.1094 | 0.1848  | 0.1794  | -0.0079 | -0.1918 | -0.1256 |
| PBANKA_131900 | -1.3437 | -0.7127 | -0.969  | -1.1288 | -0.9913 | -0.6842 | -0.1854 | 0.4629  | 0.903   | 1.5332  | 1.7845  | 1.017   |
| PBANKA_083280 | -1.4168 | -1.0194 | -1.6239 | -1.2427 | -1.682  | -0.7016 | 0.3168  | 1.0911  | 1.4588  | 1.7488  | 1.2745  | 0.0298  |
| PBANKA_140540 | 0.3676  | 0.494   | 0.0356  | -0.2991 | -0.0068 | -0.5962 | 0.0167  | -0.2224 | -0.2463 | -0.2761 | 0.029   | 0.1654  |
| PBANKA_040460 | 0.7632  | 0.1621  | 0.5     | 0.3699  | 0.3344  | -0.3874 | -0.0445 | -0.6212 | -0.9542 | -1.378  | -0.502  | -1.0068 |
| PBANKA_120620 | 0.3083  | 0.7846  | 0.1933  | -0.0503 | 0.2682  | 0.2786  | -0.0792 | -0.129  | -0.1387 | -0.145  | -0.1152 | -0.0135 |
| PBANKA_041520 | -0.517  | -0.6986 | -0.2709 | -0.1064 | -0.0311 | 0.219   | 0.1515  | 0.0874  | 0.2132  | 0.2134  | -0.4216 | -0.9795 |
| PBANKA_141520 | -0.2045 | -1.0055 | 0.0725  | 0.3263  | -0.1111 | -0.1656 | -0.278  | 0.0888  | 0.1603  | 0.1544  | 0.9502  | 1.0962  |
| PBANKA_100440 | -0.2914 | 0.1898  | -0.1117 | 0.071   | 0.0757  | -0.403  | -0.0132 | -0.3097 | -0.8534 | -0.7492 | -0.468  | -0.9716 |
| PBANKA_031440 | 0.5306  | 0.8787  | -0.0555 | 0.7181  | 0.3207  | -0.0302 | -0.3903 | -0.393  | -0.257  | -0.5184 | -0.7321 | -0.399  |
| PBANKA_101250 | 0.0838  | -0.0249 | -0.0807 | 0.2128  | -0.0533 | 0.1186  | -0.158  | -0.1064 | -0.007  | 0.3007  | 0.9767  | 0.4302  |
| PBANKA_144140 | -0.9811 | -0.7261 | -0.5699 | 0.0829  | 0.1299  | -0.08   | 0.466   | 0.3813  | 0.2196  | -0.0345 | -0.7567 | -0.046  |
| PBANKA_110160 | -1.3826 | -0.3123 | -1.0105 | -1.1461 | -0.4564 | 0.0226  | -0.5069 | -0.553  | -0.8535 | 0.3531  | -0.4269 | -0.6466 |
| PBANKA_071880 | -0.8366 | -0.584  | -0.3866 | -0.0422 | 0.0211  | 0.2822  | 0.6241  | 0.6432  | 0.5048  | 0.5044  | 0.3857  | -0.5951 |
| PBANKA_062090 | 0.077   | 0.2723  | 0.0533  | -0.0939 | -0.1179 | -0.1224 | -0.2843 | -0.1282 | 0.0119  | 0.4619  | 1.0449  | 0.6306  |
| PBANKA_132050 | 0.1734  | 0.5473  | 0.3614  | -0.2762 | -0.2336 | -0.66   | -0.4504 | -0.1989 | -0.0637 | 0.2636  | 1.5125  | 1.5974  |
| PBANKA_010440 | -0.454  | -0.7111 | -0.3953 | -0.2338 | 0.0071  | -0.0779 | 0.3901  | 0.4955  | 0.7924  | 0.7085  | 0.5338  | 0.2609  |
| PBANKA_090590 | -0.1351 | -0.0562 | -0.2343 | -1.1335 | -0.0186 | -0.5082 | -0.0081 | -0.0086 | 0.582   | 0.5808  | 0.3916  | 0.5912  |
| PBANKA_121050 | -0.0545 | 0.2781  | -0.2879 | -0.112  | -0.0369 | -0.5757 | -0.4539 | 0.478   | 0.4117  | 0.2775  | -0.4118 | -0.3551 |
| PBANKA_111770 | -0.5345 | -0.9686 | -0.2282 | -0.3673 | -0.0068 | 0.1289  | 0.5404  | 0.184   | 0.0701  | -0.1173 | -1.1161 | -0.5037 |
| PBANKA_031140 | -0.325  | -0.1746 | -0.3919 | -0.154  | -0.2357 | -0.1344 | -0.2017 | 0.333   | 0.8941  | 1.0306  | 1.0663  | 0.2288  |
| PBANKA_100150 | -0.2282 | -0.9509 | -0.159  | 0.1985  | -0.3734 | -0.0748 | 0.1428  | 0.4695  | 0.2922  | 0.6419  | 0.8933  | -0.074  |
| PBANKA_061080 | 0.0717  | 0.4623  | 0.2326  | 0.2993  | 0.1042  | 0.4731  | 0.1164  | 0.1366  | -0.0384 | -0.3158 | -0.3346 | -0.7052 |
| PBANKA_051490 | -0.9439 | -0.4541 | -1.157  | -0.7669 | -0.7044 | -1.6613 | -1.1564 | -0.2716 | 0.246   | 0.7376  | -0.0334 | 2.3168  |
| PBANKA_141190 | -0.2604 | -1.4424 | -0.1832 | -0.7089 | -0.0647 | 0.7184  | 0.3363  | 0.6071  | 0.3949  | 0.8382  | 0.0161  | -0.2751 |
| PBANKA_071520 | 0.2838  | 0.2106  | 0.3543  | 0.1214  | 0.0443  | -0.0205 | -0.1604 | -0.4694 | -0.6716 | -0.4164 | -0.4485 | -0.5076 |
| PBANKA_114560 | 0.0028  | 0.1129  | 0.0857  | -0.3833 | -0.0009 | -0.2167 | -0.0521 | 0.046   | -0.4951 | -0.6123 | -0.9486 | -1.2116 |
| PBANKA_110890 | 0.4525  | -0.3295 | 0.3819  | 0.4876  | 0.5087  | 0.3601  | 0.2309  | 0.2444  | -0.0072 | -0.6643 | -0.9007 | -1.352  |
| PBANKA_061860 | 0.0524  | 0.0804  | 0.2984  | -0.0052 | 0.0725  | 0.7679  | 0.4092  | 0.2617  | -0.2444 | -0.3815 | -0.9652 | -1.9991 |
| PBANKA_131640 | 0.3096  | 0.0919  | 0.2479  | 0.4455  | 0.2334  | 0.026   | 0.0759  | -0.3948 | -0.6022 | -0.9959 | -0.6824 | -1.4491 |
| PBANKA_143300 | -0.0846 | -0.1271 | 0.2492  | 0.4081  | 0.2286  | 0.2801  | -0.302  | -0.3351 | -0.3604 | -0.1663 | -0.0277 | -0.7627 |
| PBANKA_124290 | 0.2273  | 0.1019  | 0.1573  | 0.1289  | -0.0628 | -0.8569 | 0.063   | 0.4633  | 0.2886  | 0.3417  | 0.144   | 0.127   |
| PBANKA_100970 | -0.0594 | 0.0361  | 0.1089  | 0.7031  | 0.1787  | 0.3485  | 0.2056  | -0.0629 | -0.0408 | -0.3225 | -0.5764 | -0.2087 |
| PBANKA_011260 | 0.5943  | -0.2195 | 0.4793  | -0.3668 | 0.1607  | -0.0252 | -0.078  | 0.0438  | 0.0684  | -0.1216 | 0.4522  | 0.4271  |
| PBANKA_132130 | -0.2409 | 0.5699  | -0.1568 | -0.1106 | -0.1891 | -0.3696 | -0.5227 | 0.1033  | 0.0529  | -0.1652 | -0.246  | -0.7807 |
| PBANKA_052390 | -1.4145 | -0.8646 | -1.8201 | -1.2462 | -1.145  | -0.7469 | 0.6711  | 1.202   | 0.9757  | 1.2614  | 0.5275  | -0.2127 |
| PBANKA_114490 | -0.5085 | -0.4813 | 0.0248  | 0.5376  | 0.5579  | 0.7259  | 0.3134  | 0.1346  | 0.0101  | -0.1995 | -0.1565 | -0.3295 |
| PBANKA_093280 | -0.3931 | -0.0945 | -0.6102 | -0.9155 | -0.1208 | 0.1431  | -0.0551 | 0.2645  | 0.1345  | 0.5389  | -0.0763 | -0.5365 |
| PBANKA_091550 | 0.1697  | -1.9693 | 0.2773  | 0.4848  | 0.1281  | 0.389   | 0.0047  | -0.1663 | -0.6001 | -0.9598 | -0.822  | -0.9453 |
| PBANKA_143090 | -0.2134 | -0.6486 | 0.255   | -0.3066 | 0.0274  | 0.6773  | -0.0187 | 0.0658  | -0.0563 | 0.0023  | -0.3304 | -0.5783 |
| PBANKA_082650 | -0.3753 | -0.0276 | 0.0992  | 0.167   | 0.573   | 0.3301  | 0.2493  | -0.0768 | -0.2489 | -0.4622 | -0.9767 | -1.3628 |
| PBANKA_081870 | 0.1594  | 0.2311  | 0.3207  | 0.3255  | -0.4294 | 0.2513  | -0.1817 | -0.0814 | -0.5806 | -0.5231 | 0.7671  | 0.8208  |
| PBANKA_093390 | -0.3036 | -0.6025 | -0.3479 | -1.0211 | -0.2443 | -0.2019 | 0.1127  | -0.7516 | -0.7368 | -1.3683 | -0.9889 | -0.992  |
| PBANKA_093130 | 0.6752  | 0.7643  | 0.686   | 0.4496  | 0.3929  | 0.0941  | -0.6322 | -1.2466 | -1.3893 | -1.6998 | -0.678  | -0.4753 |
| PBANKA_144400 | -0.565  | -0.0585 | 0.4059  | 0.1263  | 0.6601  | 0.2859  | -0.2205 | -0.9049 | -1.651  | -2.2606 | -2.1899 | -2.6291 |
| PBANKA_021420 | -0.053  | 0.8157  | 0.1981  | -0.1746 | 0.0209  | 0.0853  | -0.1492 | -0.5456 | -0.7735 | -0.6733 | -0.2388 | -0.5854 |
| PBANKA_101580 | -0.2074 | -0.293  | 0.1699  | 0.3416  | -0.0068 | 0.2131  | 0.2586  | 0.6266  | 0.1615  | 0.3999  | -0.0983 | -1.0929 |

|               |         |         |         |         |         |         |         |         |         |         |         |         |
|---------------|---------|---------|---------|---------|---------|---------|---------|---------|---------|---------|---------|---------|
| PBANKA_040140 | 0.3154  | 1.0651  | 0.5944  | -0.4382 | 0.287   | -0.2982 | -0.2558 | -0.2512 | -0.1924 | -0.1155 | -0.5076 | -0.2414 |
| PBANKA_070570 | 0.5506  | 0.1918  | 0.3738  | 0.6164  | -0.0589 | 0.3642  | -0.3714 | -0.1091 | -0.0938 | -0.1392 | 0.3244  | 0.4255  |
| PBANKA_020490 | -0.4743 | -0.2795 | -0.4401 | -0.2064 | 0.0539  | 0.0666  | 0.1681  | 0.1291  | -0.1176 | -0.2194 | -0.2697 | -0.4155 |
| PBANKA_133240 | -0.3737 | -0.1929 | -0.3901 | 0.0125  | 0.2259  | 0.4796  | 0.5109  | 0.4935  | 0.049   | 0.1045  | -0.8032 | -0.6767 |
| PBANKA_010050 | -0.1655 | 0.447   | -0.4701 | -0.5583 | -0.1989 | -0.6763 | -0.8048 | -0.5098 | -0.3702 | 0.2793  | 1.5767  | 1.6763  |
| PBANKA_082990 | 0.1552  | 0.2741  | 0.0273  | 0.128   | 0.2478  | -0.0421 | 0.1621  | 0.0027  | 0.2687  | 0.0899  | -0.2805 | 0.0815  |
| PBANKA_080790 | 0.3991  | 0.161   | 0.0457  | 0.1592  | 0.1196  | -0.1531 | -0.0114 | 0.2352  | 0.4888  | 0.6692  | 0.1134  | -0.1063 |
| PBANKA_130470 | -0.3117 | -0.8021 | 0.0713  | -0.0208 | -0.0775 | 0.1496  | 0.0112  | 0.0421  | -0.0945 | -0.1802 | 0.1925  | -0.6204 |
| PBANKA_092340 | 0.2557  | 0.4467  | 0.3898  | 0.4415  | -0.0153 | 0.0163  | 0.093   | -0.5054 | -0.5104 | -0.5145 | 0.0697  | 0.4489  |
| PBANKA_061030 | -0.7705 | 0.1489  | -0.2259 | -0.3122 | -0.2559 | 0.1684  | -0.2273 | 0.1193  | -0.2074 | -0.2304 | -0.1679 | -0.1103 |
| PBANKA_081630 | 0.1223  | -0.1362 | 0.0923  | 0.1288  | -0.1051 | 0.4796  | 0.4738  | 0.1026  | 0.0189  | -0.1811 | -0.8387 | 0.0033  |
| PBANKA_093710 | -0.3825 | -0.1675 | -0.1778 | 0.2317  | 0.0025  | 0.2995  | 0.1168  | 0.2497  | -0.1608 | -0.1903 | -0.516  | -0.4228 |
| PBANKA_111240 | 0.3704  | 0.2178  | 0.4331  | 0.5567  | 0.2815  | 0.3893  | 0.1768  | -0.3226 | -0.9328 | -1.3884 | -1.0991 | -0.6122 |
| PBANKA_030250 | -0.245  | 0.1609  | 0.1678  | -0.2646 | 0.0695  | 0.6535  | -0.2118 | -0.0277 | -0.3317 | -0.5341 | -0.7488 | -0.036  |
| PBANKA_060060 | -0.2605 | -0.9763 | -0.3273 | 0.4441  | -0.1748 | -0.0238 | -0.1637 | 0.0322  | 0.7609  | 0.5988  | 0.029   | 1.9202  |
| PBANKA_041010 | 0.0714  | 0.3637  | 0.3835  | 0.4753  | 0.2294  | 0.235   | -0.0769 | -0.2822 | -0.0092 | -0.0787 | 0.1961  | 0.4045  |
| PBANKA_130120 | -0.3153 | -0.1452 | 0.1434  | -0.0589 | 0.066   | -0.0387 | -0.1964 | -0.8416 | -1.0894 | -1.2593 | -1.386  | -1.3094 |
| PBANKA_120320 | 0.1464  | 0.3419  | 0.2617  | 0.5281  | 0.1673  | 0.4016  | 0.1744  | -0.3265 | -0.4804 | -0.7535 | -0.614  | -0.7301 |
| PBANKA_143040 | 0.0224  | -0.0514 | 0.3199  | 0.5091  | 0.416   | 0.2606  | -0.31   | -0.8262 | -0.9809 | -1.6303 | -1.2134 | -0.9633 |
| PBANKA_110970 | -0.6613 | -0.3708 | -0.2314 | -0.2936 | 0.3278  | 0.1112  | 0.2038  | 0.2618  | 0.1054  | 0.2971  | -0.0538 | -0.1279 |
| PBANKA_110610 | 0.2325  | 0.418   | 0.2038  | 0.449   | 0.0828  | 0.5073  | 0.1721  | 0.6751  | 0.4097  | 0.096   | 0.2472  | 0.2798  |
| PBANKA_141420 | -0.1522 | -0.8904 | 0.2756  | 0.3944  | 0.4535  | 0.6846  | 0.4133  | -0.2188 | -0.073  | -0.5264 | -1.2718 | -0.7796 |
| PBANKA_123220 | -0.3072 | 0.2968  | 0.1577  | -0.0293 | -0.4981 | 0.2691  | -0.0206 | -0.0258 | -0.1676 | -0.0491 | -0.1237 | -0.0289 |
| PBANKA_070270 | -0.1318 | -0.1668 | -0.2513 | 0.0839  | -0.038  | 0.261   | 0.1076  | 0.1373  | 0.589   | 0.3225  | 0.2592  | 0.9536  |
| PBANKA_135030 | -0.1464 | -0.5699 | -0.05   | 0.3948  | 0.4308  | -0.3288 | 0.3676  | -0.1637 | -0.3495 | -0.6026 | -0.7841 | -0.9104 |
| PBANKA_141910 | -0.1603 | -0.09   | 0.066   | 0.2883  | 0.2945  | 0.3663  | -0.1773 | -0.3509 | -0.8644 | -1.123  | -0.4947 | -0.7302 |
| PBANKA_142400 | 0.2966  | 0.3494  | 0.0546  | 0.3297  | 0.2105  | 0.2034  | 0.215   | 0.1488  | 0.1642  | -0.2159 | -0.6446 | -0.2664 |
| PBANKA_060770 | 0.1189  | 0.5095  | -0.04   | 0.1613  | 0.2097  | 0.3611  | 0.2244  | 0.296   | 0.2955  | 0.3721  | 0.3263  | -0.4146 |
| PBANKA_123180 | 0.5221  | 0.0939  | 0.3505  | 0.5837  | 0.5838  | 0.1688  | -0.0586 | -0.5036 | -0.5619 | -1.0034 | -1.0196 | -0.7158 |
| PBANKA_101560 | -0.055  | 0.2495  | -0.0874 | -1.1668 | -0.3687 | -0.0056 | 0.4002  | 0.4438  | -0.2283 | -0.4336 | -0.8122 | -0.6567 |
| PBANKA_060040 | 0.4538  | 0.3385  | 0.2351  | 0.3931  | -0.0915 | 0.2323  | -0.1881 | -0.7466 | -0.8678 | -0.82   | -0.4371 | -0.0902 |
| PBANKA_131300 | -0.1894 | 0.4819  | -0.4853 | -0.5876 | -0.1441 | -0.6035 | -0.2947 | -0.3998 | -0.0498 | 0.4997  | 1.8427  | 1.5392  |
| PBANKA_060050 | 0.2895  | 0.2698  | -0.2353 | -0.2879 | -0.0629 | -0.1334 | -0.2459 | -0.3624 | -0.2911 | -0.3811 | -0.7629 | 0.413   |
| PBANKA_091990 | 0.0253  | 0.1307  | -0.0882 | 0.0571  | -0.0066 | -0.213  | 0.1505  | 0.4731  | 0.3369  | 0.2577  | 0.4766  | 0.4628  |
| PBANKA_091560 | -1.8759 | -1.5407 | -1.6793 | -0.9138 | -0.8563 | 0.2145  | 0.8723  | 0.8454  | 1.001   | 1.071   | -0.1394 | -0.3099 |
| PBANKA_132220 | -0.1396 | -0.3762 | -0.2816 | 0.068   | -0.1273 | 0.213   | 0.2893  | 0.7248  | 0.1723  | 0.5121  | 0.1036  | -0.4021 |
| PBANKA_070760 | 0.1843  | -0.3606 | 0.2345  | 0.623   | 0.452   | 0.2238  | 0.2657  | 0.2142  | 0.0784  | -0.0326 | -0.3822 | -0.2327 |
| PBANKA_121160 | -0.6889 | -0.3091 | -0.5831 | 0.4252  | -0.1783 | 0.3006  | 0.1531  | 0.2939  | 0.255   | 0.3074  | 0.2928  | -0.4275 |
| PBANKA_101010 | 0.3154  | 1.0561  | 0.0757  | 0.1709  | -0.0767 | -0.7898 | -0.0645 | -0.4132 | -0.588  | -0.2767 | -0.2379 | -0.1853 |
| PBANKA_103060 | -0.1429 | 0.3265  | -0.0184 | -0.1121 | 0.2765  | -0.1121 | 0.3047  | 0.1383  | -0.0918 | 0.0026  | -0.1431 | 0.3351  |
| PBANKA_145120 | 0.4586  | 0.5017  | 0.0978  | -0.0818 | -0.0015 | -0.3307 | -0.2185 | 0.0369  | 0.4277  | 0.1417  | 0.683   | 0.7711  |
| PBANKA_100880 | 0.3035  | 0.9553  | 0.219   | -0.6106 | 0.0363  | -0.3649 | 0.0302  | -0.0513 | 0.0968  | -0.3442 | -0.4329 | -0.3474 |
| PBANKA_144290 | 0.06    | 0.2723  | 0.2321  | -0.0955 | 0.5373  | -0.5257 | 0.0299  | 0.1554  | -0.1421 | -0.3259 | -0.4705 | 0.7148  |
| PBANKA_144830 | 0.002   | 0.2685  | 0.2218  | 0.4043  | 0.1738  | 0.449   | 0.0082  | -0.151  | 0.0159  | -0.2585 | -0.2255 | -0.1214 |
| PBANKA_141390 | 0.0868  | -0.0678 | -0.2196 | -0.2037 | -0.3446 | -0.3634 | -0.3308 | -0.2049 | -0.1661 | 0.3272  | 0.1139  | 0.581   |
| PBANKA_132750 | 0.2188  | 0.215   | 0.0763  | 0.201   | 0.134   | -0.3267 | -0.2254 | 0.0736  | -0.2537 | -0.4102 | -0.1623 | -0.3784 |
| PBANKA_081330 | -0.7084 | 0.1114  | 0.0386  | -0.0516 | -0.1293 | -0.0414 | -0.2652 | 0.0434  | -0.2672 | 0.3154  | -1.1126 | 0.6406  |
| PBANKA_112390 | -0.5847 | 0.4816  | -0.2438 | 0.143   | -0.0485 | -0.0586 | -0.2224 | -0.2032 | -0.3473 | -0.2126 | -0.0576 | -0.2881 |
| PBANKA_133570 | -0.7995 | -0.6644 | -0.4462 | -0.3153 | -0.4655 | -0.7286 | 0.0589  | 0.5228  | 0.8325  | 0.9977  | 1.151   | 1.3151  |
| PBANKA_134060 | 0.1198  | 0.2158  | 0.1438  | 0.6552  | -0.3637 | 0.5614  | 0.2189  | 0.1604  | 0.4083  | 0.1238  | 0.1795  | 0.5943  |
| PBANKA_070200 | -0.4579 | -0.781  | 0.1255  | -0.1203 | 0.2888  | 0.673   | 0.1603  | 0.5188  | 0.6176  | 0.5441  | 0.3296  | 0.3425  |
| PBANKA_030860 | 0.1134  | 0.756   | 0.2948  | 0.0422  | 0.143   | -1.2864 | -0.1537 | -0.4596 | -0.6939 | -0.6529 | -0.2133 | 0.4109  |
| PBANKA_091520 | -0.653  | -0.7424 | -0.6437 | -0.3364 | -0.1678 | 0.1393  | 0.5008  | 0.7782  | 0.2883  | 0.4931  | -0.5002 | -0.8105 |
| PBANKA_141340 | -0.0699 | 0.1612  | 0.1637  | 0.1932  | 0.2017  | 0.1565  | 0.0597  | -0.4282 | -1.0002 | -1.2014 | -1.1204 | -1.4266 |
| PBANKA_051590 | 0.4999  | -0.7449 | -0.0028 | -0.2663 | -0.0322 | 0.1497  | 0.1199  | 0.6301  | 0.0631  | 0.6423  | -0.2478 | 0.4229  |
| PBANKA_132060 | 0.1774  | -0.2496 | 0.235   | 0.1359  | -0.0111 | -0.2063 | -0.262  | -0.2506 | -0.3861 | -0.4317 | 0.0165  | 0.7597  |
| PBANKA_144580 | -0.1897 | 0.3801  | -0.0845 | -0.0596 | 0.1526  | -0.0084 | -0.0784 | -0.0491 | 0.396   | 0.1758  | -0.045  | 0.1104  |
| PBANKA_070920 | 0.6439  | 0.9632  | 0.1847  | 0.3464  | 0.4636  | 0.2862  | 0.2433  | -0.0206 | -0.1096 | -0.351  | -0.3114 | -0.3392 |
| PBANKA_134720 | 0.2629  | 0.1612  | -0.0384 | -0.0834 | 0.1086  | 0.3336  | 0.0823  | 0.3076  | 0.0956  | -0.0378 | -0.3194 | -0.0512 |
| PBANKA_090730 | -0.432  | -1.8061 | 0.2274  | 0.5797  | 0.375   | 0.53    | 0.1648  | 0.3072  | 0.0558  | -0.2319 | -1.0028 | -0.9401 |
| PBANKA_133270 | -0.7396 | -0.8583 | -0.3917 | -0.455  | -0.4954 | -0.2134 | 0.2075  | 0.5375  | 0.8259  | 0.8234  | 1.5021  | 1.4032  |
| PBANKA_070770 | -1.4965 | -0.9074 | -1.7405 | -0.9181 | -1.1652 | -0.4475 | 0.0054  | 0.8434  | 1.3892  | 1.8913  | 0.7286  | 0.2695  |
| PBANKA_010370 | -0.0054 | 0.5706  | 0.4034  | 0.3082  | 0.2842  | 0.3048  | -0.3822 | -0.5306 | -1.2513 | -1.3694 | -0.5672 | -1.0875 |

|               |         |         |         |         |         |         |         |         |         |         |         |         |
|---------------|---------|---------|---------|---------|---------|---------|---------|---------|---------|---------|---------|---------|
| PBANKA_124550 | -0.1074 | -0.4623 | 0.0054  | -0.084  | 0.101   | -1.4212 | 0.2574  | 0.6129  | 0.3759  | 0.2419  | 0.1637  | -0.1668 |
| PBANKA_111810 | -0.118  | -0.4928 | 0.292   | 0.4583  | 0.1763  | 0.697   | 0.214   | 0.2824  | 0.4069  | -0.0228 | -0.5344 | -1.2176 |
| PBANKA_031580 | -0.8772 | -0.8312 | -0.5719 | 0.0602  | 0.0202  | 0.5859  | 0.6689  | 0.4935  | 0.4068  | -0.0969 | -0.9526 | -0.7134 |
| PBANKA_112540 | -0.106  | -0.1424 | -0.1349 | 0.5603  | 0.2888  | 0.448   | 0.0503  | -0.1307 | -0.0009 | -0.6183 | -0.3485 | -0.3787 |
| PBANKA_131500 | -1.1922 | -0.7382 | -0.7393 | -0.0084 | 0.175   | 0.42    | 0.6013  | 0.4125  | 0.3631  | -0.0049 | -0.5397 | -0.5513 |
| PBANKA_141220 | 0.2232  | 0.4814  | 0.1232  | 0.1024  | 0.3173  | 0.3017  | 0.0121  | -0.0093 | -0.059  | -0.17   | -0.3789 | -0.4067 |
| PBANKA_020230 | 0.5377  | 0.8725  | 0.381   | 0.3026  | 0.1474  | 0.1806  | 0.0101  | -0.5032 | -0.7442 | -1.0574 | -1.0449 | -0.1316 |
| PBANKA_131730 | 0.4678  | 1.2221  | 0.3594  | 0.2667  | 0.1308  | -0.2992 | -0.0993 | -0.3731 | -0.5167 | -0.6212 | -0.7538 | -0.5737 |
| PBANKA_112990 | 0.0243  | -0.2384 | 0.1621  | -0.1369 | -0.1951 | -0.009  | 0.0249  | 0.1269  | 0.0534  | -0.1508 | -0.3157 | -0.0916 |
| PBANKA_060110 | -0.6678 | 0.1235  | 0.4282  | -0.0642 | 0.2238  | 0.5483  | 0.2317  | -0.4322 | -0.3483 | -0.5934 | -1.2282 | -0.6832 |
| PBANKA_051910 | -1.5902 | -1.2431 | -2.0402 | -1.2929 | -1.0057 | -0.5991 | 0.5192  | 0.8672  | 0.9151  | 1.4605  | 0.4311  | -0.4507 |
| PBANKA_031040 | 0.3042  | 0.5875  | 0.333   | 0.3978  | 0.1251  | -0.8325 | 0.1146  | -0.0094 | -0.2991 | -0.1951 | -0.3991 | -0.0983 |
| PBANKA_060730 | 0.1096  | 0.5737  | 0.153   | 0.085   | -0.0026 | -0.0516 | -0.0941 | -0.2461 | -0.0594 | 0.2359  | 0.6267  | 0.7476  |
| PBANKA_132110 | 0.212   | 0.021   | 0.2699  | 0.7051  | 0.3317  | 0.3844  | 0.0523  | -0.1299 | -0.2278 | -0.2295 | -0.1165 | 0.2256  |
| PBANKA_092160 | 0.2349  | 0.1067  | 0.0677  | -0.0247 | 0.0822  | -0.0461 | 0.3051  | 0.5441  | 0.1856  | 0.5582  | -0.1407 | -0.4782 |
| PBANKA_083580 | -0.4259 | -0.4281 | -0.2784 | 0.5736  | 0.1667  | 0.3995  | 0.1458  | -0.4189 | -0.3849 | -0.7009 | -0.4569 | -0.5317 |
| PBANKA_101370 | 0.1138  | 0.1981  | -0.0587 | 0.1872  | 0.0999  | 0.5007  | 0.184   | -0.0599 | -0.2464 | -0.7223 | -0.6369 | -0.7159 |
| PBANKA_072140 | 0.5411  | 0.5614  | 0.3597  | 0.3804  | 0.2947  | 0.1714  | 0.0863  | -0.345  | -0.6099 | -0.3345 | -0.2659 | -0.167  |
| PBANKA_121350 | 0.2203  | -0.0885 | -0.0571 | 0.3803  | 0.067   | 0.4445  | 0.1368  | 0.0947  | 0.0285  | -0.1582 | -0.8452 | 0.1245  |
| PBANKA_142430 | 0.0304  | 0.395   | 0.0565  | 0.1354  | -0.0877 | -0.0337 | -0.4643 | -0.3378 | -0.0289 | 0.2012  | 0.5961  | 0.8134  |
| PBANKA_041230 | -0.2054 | 0.2068  | -0.3635 | -0.0787 | -0.0286 | 0.0567  | 0.2572  | 0.2637  | 0.2637  | 0.4022  | 0.3612  | 0.1414  |
| PBANKA_124430 | -0.1391 | 0.6773  | -0.1926 | 0.0488  | 0.123   | 0.2158  | 0.0884  | 0.1926  | -0.0161 | 0.0796  | 0.1302  | 0.2543  |
| PBANKA_112300 | -0.3581 | 0.3225  | 0.1131  | 0.3404  | 0.2031  | 0.3609  | -0.0694 | -0.3914 | -0.3002 | -0.27   | -0.3714 | -0.1489 |
| PBANKA_130920 | 0.1915  | 0.121   | -0.2717 | 0.1554  | -0.3213 | -0.3391 | -0.0249 | 0.1352  | 0.5618  | 0.7575  | 0.7372  | 0.8474  |
| PBANKA_094110 | 0.2987  | -0.102  | 0.291   | 0.376   | 0.3171  | 0.2326  | -0.0243 | -0.3761 | -0.2838 | -0.8212 | -0.5861 | -0.5686 |
| PBANKA_143100 | 0.0484  | -0.3792 | 0.3169  | 0.4828  | 0.3916  | 0.2464  | 0.3038  | -0.4572 | -0.6286 | -0.8681 | -0.6447 | -0.6467 |
| PBANKA_091240 | -0.8192 | 0.0064  | -0.8594 | -0.4337 | -0.4566 | -0.3622 | -0.3577 | -0.0898 | 0.2116  | 1.1819  | 0.6822  | -0.0075 |
| PBANKA_094270 | -0.1509 | 0.2405  | -0.0866 | -0.2743 | 0.1155  | -0.5476 | -0.0699 | 0.5246  | 0.3371  | 0.527   | 0.6071  | -0.3281 |
| PBANKA_062120 | 1.0016  | 1.2251  | 0.312   | 0.6659  | 0.1506  | 0.5915  | -0.0419 | -0.5063 | -0.136  | -0.2797 | 0.6932  | 0.2259  |
| PBANKA_110340 | 0.1848  | 0.2817  | 0.4229  | 0.3798  | 0.1949  | 0.2479  | -0.2745 | -0.649  | -0.6603 | -1.32   | -0.82   | 0.4309  |
| PBANKA_070230 | -0.1182 | 0.4317  | 0.0725  | 0.0743  | 0.0351  | 0.4203  | 0.435   | -0.2055 | 0.6496  | 0.1612  | 0.0488  | 0.4626  |
| PBANKA_134340 | -0.4424 | 0.327   | -0.3244 | -0.041  | -0.0121 | -0.2983 | 0.0462  | 0.1547  | 0.2622  | 0.2722  | -0.1102 | -0.063  |
| PBANKA_130320 | -0.0543 | -0.1431 | -0.3812 | -0.2246 | 0.0209  | 0.2669  | -0.2821 | 0.0617  | -0.0378 | 0.0065  | 0.1592  | 0.1488  |
| PBANKA_041160 | -0.1861 | 0.2559  | 0.1623  | 0.2403  | -0.0473 | 0.504   | 0.3395  | 0.2897  | 0.0689  | 0.2584  | -0.0762 | -0.2989 |
| PBANKA_060680 | 0.352   | -0.1907 | 0.42    | 0.7061  | 0.5056  | 0.0722  | -0.3354 | -0.6941 | -0.9855 | -1.6813 | -1.6868 | -1.5773 |
| PBANKA_123140 | 0.0479  | -0.1477 | -0.0005 | 0.0607  | -0.0178 | 0.3897  | 0.1839  | 0.9052  | 0.2221  | 0.1079  | -0.5237 | -0.3126 |
| PBANKA_071700 | 0.183   | 0.8503  | 0.3493  | -0.0656 | 0.2429  | -0.0314 | -0.2763 | -0.6001 | -0.5636 | -0.8541 | -0.4222 | -0.7228 |
| PBANKA_101970 | 0.5317  | -0.0802 | -0.1356 | 0.3334  | 0.0053  | 0.0369  | -0.5922 | -0.2076 | 0.2569  | 0.5479  | 0.8817  | 0.6027  |
| PBANKA_040190 | 0.1491  | 0.0588  | 0.2669  | 0.3706  | 0.2227  | 0.167   | -0.0673 | -0.1455 | -0.139  | -0.2696 | 0.2155  | 0.8771  |
| PBANKA_136340 | -0.052  | 0.0374  | -0.2261 | 0.0637  | 0.3626  | 0.2455  | 0.2334  | -0.0671 | 0.1977  | 0.0037  | -0.279  | -0.3632 |
| PBANKA_114380 | -0.7228 | -0.1141 | -0.107  | -0.0691 | 0.2994  | 0.571   | 0.02    | 0.1891  | 0.0851  | -0.1928 | 0.0015  | 0.1011  |
| PBANKA_111410 | 0.2305  | 0.2133  | -0.0541 | 0.2677  | -0.119  | 0.3315  | -0.393  | 0.1408  | 0.1392  | 0.3534  | 0.8877  | 1.499   |
| PBANKA_131580 | 0.2411  | 0.2007  | -0.0642 | -0.0232 | 0.1631  | 0.4104  | 0.0261  | 0.0879  | 0.1305  | -0.1188 | 0.1681  | 0.9342  |
| PBANKA_030440 | -0.7399 | -0.6457 | -0.7184 | -0.3058 | -0.1879 | 0.1775  | 0.5242  | 0.7518  | 0.4249  | 0.5858  | -0.0052 | -0.229  |
| PBANKA_070420 | -0.2859 | -0.2592 | 0.0508  | 0.3233  | 0.1496  | 0.1993  | 0.369   | 0.1218  | 0.026   | -0.3113 | -0.5708 | -0.5742 |
| PBANKA_130590 | -0.4299 | -0.0734 | 0.2265  | 0.0761  | 0.64    | 0.1909  | -0.0829 | -0.4083 | -0.9399 | -0.9547 | -0.7268 | -0.543  |
| PBANKA_103960 | 0.1708  | 0.0995  | -0.0643 | 0.0297  | 0.0854  | 0.1267  | -0.0825 | -0.4434 | -0.3482 | -0.553  | -0.2047 | -0.6767 |
| PBANKA_041080 | 0.2247  | -0.0434 | 0.4557  | -0.0069 | -1.1735 | 0.3307  | 0.4493  | -0.049  | -0.2835 | -0.5275 | -0.666  | -0.414  |
| PBANKA_121190 | 0.1345  | -0.2414 | -0.2133 | -0.2139 | -0.1004 | -0.4461 | 0.029   | 0.3922  | 0.3639  | 0.3929  | 0.2118  | -0.1129 |
| PBANKA_060820 | -0.6997 | -0.1878 | -0.1132 | 0.0211  | 0.0925  | 0.4688  | 0.0487  | -0.2328 | -0.2905 | -0.2566 | -0.7091 | -0.4654 |
| PBANKA_132340 | -0.3081 | 0.4061  | -0.1218 | 0.0072  | 0.0938  | 0.3343  | 0.0029  | 0.0966  | 0.081   | -0.2496 | -0.3454 | -0.0443 |
| PBANKA_133670 | 0.3937  | 0.9924  | 0.4829  | 0.2404  | -0.0527 | -0.046  | 0.0655  | -0.1937 | -0.1472 | -0.0666 | -0.2131 | 0.0971  |
| PBANKA_142230 | 0.3452  | 0.4731  | 0.0617  | -0.4786 | 0.2463  | 0.336   | 0.1356  | -0.1762 | -0.301  | -0.5073 | -0.5284 | -0.9234 |
| PBANKA_140120 | 0.2951  | 0.4608  | 0.1674  | -0.2759 | -0.2364 | -0.5897 | -0.5419 | -0.1335 | -0.3042 | 0.2548  | 0.8689  | 0.8805  |
| PBANKA_111780 | 0.597   | 0.8312  | 0.6454  | 0.4249  | 0.3912  | 0.5445  | -0.504  | -0.7829 | -1.03   | -1.4418 | -0.9369 | -0.8747 |
| PBANKA_071660 | -0.31   | -0.9442 | 0.3126  | 0.8549  | 0.3142  | 0.178   | 0.1454  | 0.1472  | 0.5433  | 0.1856  | -0.0296 | 0.1307  |
| PBANKA_010770 | 0.1783  | 0.5124  | -0.0421 | -0.4746 | -0.0745 | -0.085  | -0.6541 | -0.558  | -0.2079 | 0.0261  | -0.1619 | 1.6946  |
| PBANKA_062110 | -0.3958 | 0.043   | 0.0978  | -0.523  | 0.2218  | 0.5699  | -0.0515 | 0.0137  | -0.0336 | -0.0331 | 0.1811  | -0.4641 |
| PBANKA_133130 | 0.2049  | 0.1833  | 0.168   | 0.4234  | -0.0436 | 0.516   | 0.0968  | 0.3459  | 0.3258  | 0.2578  | 0.0886  | 0.0996  |
| PBANKA_081070 | -1.0196 | 0.4375  | -0.6998 | -0.2688 | -0.1135 | -0.6517 | -0.5146 | -0.38   | 0.0846  | 0.852   | 1.9893  | 2.0273  |
| PBANKA_021060 | 0.2452  | 0.7941  | 0.2635  | 0.1541  | 0.0697  | -0.0567 | -0.1758 | -0.1035 | -0.3947 | -0.3996 | -0.5009 | -0.4474 |
| PBANKA_020300 | -1.0019 | -0.6336 | -0.6915 | -0.1439 | 0.1716  | 0.3166  | 0.3323  | 0.144   | 0.0638  | -0.2629 | -0.8743 | -0.7972 |
| PBANKA_080270 | 0.2056  | 0.4378  | 0.3414  | -0.082  | -0.5913 | 0.4211  | 0.0033  | 0.012   | 0.1152  | 0.0702  | -0.1522 | 0.0314  |

|               |         |         |         |         |         |         |         |         |         |         |         |         |
|---------------|---------|---------|---------|---------|---------|---------|---------|---------|---------|---------|---------|---------|
| PBANKA_113640 | -0.2986 | 0.0189  | -0.2926 | 0.2816  | 0.1831  | 0.0563  | 0.079   | -0.2475 | -0.2952 | 0.0248  | -0.0623 | -0.2843 |
| PBANKA_130210 | -0.0236 | -0.6616 | 0.4626  | 0.2362  | 0.6718  | 0.2003  | -0.2946 | -0.5804 | -0.2816 | -0.7126 | -0.8496 | -0.6168 |
| PBANKA_111280 | -0.5062 | -0.3391 | -0.069  | 0.1858  | 0.1721  | 0.2542  | 0.3638  | 0.4034  | 0.7395  | 0.5494  | 0.2088  | 0.4832  |
| PBANKA_110140 | -1.9146 | -1.7766 | -2.1635 | -1.3702 | -0.9093 | -0.3666 | 0.7747  | 0.8101  | 1.2148  | 1.5925  | 0.3012  | 0.0211  |
| PBANKA_123650 | -0.3179 | -1.0893 | -0.048  | -0.2555 | -0.264  | 0.2237  | 0.3818  | 0.526   | 0.7734  | 0.8724  | 0.1785  | 0.2466  |
| PBANKA_021010 | -1.0501 | -0.3273 | -0.9082 | -0.0951 | -0.2368 | 0.0203  | 0.3987  | 0.8311  | 1.1244  | 0.8518  | 0.4873  | 0.1297  |
| PBANKA_070980 | -0.4248 | -0.1754 | -0.5267 | -0.1274 | -0.4061 | 0.4989  | 0.5924  | 0.5284  | 0.4472  | 0.3473  | 0.2727  | -0.0042 |
| PBANKA_090170 | -0.9543 | -0.4996 | -0.4742 | 0.022   | -0.031  | 0.4144  | 0.785   | 0.4269  | 0.5471  | 0.1759  | -0.5444 | -0.8087 |
| PBANKA_111180 | 0.155   | 1.2461  | 0.0663  | 0.8395  | 0.0976  | -0.0097 | -0.5154 | -0.2345 | -0.1233 | -0.0532 | -0.6657 | -0.1251 |
| PBANKA_040620 | -0.0713 | -0.4506 | 0.1117  | 0.4014  | 0.0236  | 0.1484  | -0.1952 | 0.3128  | 0.9121  | 0.8417  | 0.7812  | 0.6342  |
| PBANKA_080820 | -0.1627 | -0.4166 | 0.1193  | 0.3476  | 0.3878  | 0.2221  | 0.1047  | -0.2834 | -0.5911 | -1.2158 | -1.485  | -1.8427 |
| PBANKA_061270 | -0.0254 | -0.5525 | -0.0062 | 0.7477  | 0.0582  | 0.5277  | 0.4954  | 0.3124  | 0.3389  | 0.2375  | -0.1718 | -0.5979 |
| PBANKA_111900 | 0.1839  | -0.007  | 0.1774  | 0.0016  | 0.2124  | 0.5345  | -0.0749 | 0.3328  | 0.2438  | -0.1423 | -0.5951 | 0.4916  |
| PBANKA_120270 | 0.9169  | 0.3584  | 0.6171  | 0.2064  | 0.5545  | 0.0141  | -0.3883 | -0.4823 | -0.6608 | -0.9382 | -0.7962 | -1.0506 |
| PBANKA_122400 | 0.0242  | 0.4022  | 0.3659  | 0.5307  | 0.282   | 0.4525  | -0.0177 | 0.3337  | 0.0625  | 0.3945  | -0.0449 | -0.44   |
| PBANKA_132920 | -0.0618 | -0.0528 | -0.187  | -0.2266 | 0.0458  | -0.7212 | 0.0671  | 0.1731  | 0.2592  | 0.2187  | 0.1687  | 0.1553  |
| PBANKA_070740 | -0.1075 | -0.0032 | -0.0201 | -0.1665 | 0.0737  | -0.2641 | -0.619  | -0.7551 | -0.1937 | 0.1364  | 0.8965  | 1.0648  |
| PBANKA_143070 | -0.4552 | -0.0322 | -0.4248 | -0.2129 | -0.5813 | -0.003  | 0.0651  | 0.1211  | 0.1124  | 0.4417  | -0.0087 | -0.2335 |
| PBANKA_133360 | -0.452  | -0.8406 | -0.1318 | -0.1225 | 0.3676  | 0.2318  | 0.4164  | 0.0399  | 0.219   | -0.012  | -0.5588 | -0.8498 |
| PBANKA_140440 | 0.2334  | 1.0555  | -0.0094 | 0.268   | 0.2069  | -0.0354 | -0.3595 | -0.4342 | -0.0898 | 0.1059  | 0.6319  | 0.2575  |
| PBANKA_082710 | -0.1458 | -0.1246 | -0.0979 | 0.2356  | -0.1077 | -0.2102 | 0.2511  | 0.2714  | 0.2171  | 0.3523  | 0.1327  | 0.4892  |
| PBANKA_113720 | -0.1786 | 0.2254  | 0.1304  | -0.4322 | 0.1731  | -0.4841 | -0.0173 | -0.6081 | -0.6543 | -0.2562 | 0.3282  | 0.4227  |
| PBANKA_010560 | 1.0727  | 0.6585  | 0.1579  | 0.1249  | -0.0769 | 0.4092  | -0.0574 | -0.5097 | -0.3558 | -0.4336 | 0.4316  | -0.1453 |
| PBANKA_050610 | 0.0306  | -0.6033 | -0.0183 | -0.0126 | 0.1197  | 0.7263  | 0.2829  | 0.3248  | 0.1683  | 0.3037  | -0.2266 | -0.6964 |
| PBANKA_082350 | 0.3888  | 0.7545  | 0.4681  | 0.5943  | -0.2975 | -0.2135 | -0.1685 | -0.5291 | -0.1612 | -0.7928 | 0.1665  | -0.3326 |
| PBANKA_135310 | -0.0442 | -0.0947 | -0.3987 | -0.2026 | 0.0045  | 0.1055  | 0.3081  | 0.5014  | 0.87    | 1.1495  | 0.0189  | -0.1844 |
| PBANKA_050180 | -1.6247 | -0.8985 | -2.3562 | -1.7953 | -1.6164 | -1.1149 | -0.1997 | 0.5902  | 1.3001  | 1.3756  | 1.8396  | 1.3037  |
| PBANKA_121280 | -0.3598 | 0.4673  | 0.0733  | 0.1741  | 0.1427  | -0.0185 | 0.1019  | 0.0021  | -0.2872 | -0.4245 | -0.5128 | -0.8851 |
| PBANKA_092480 | 0.2449  | 1.2153  | -0.2668 | -0.2569 | -0.4063 | -0.0455 | -0.4651 | -0.3244 | -0.4898 | 0.0152  | 0.0417  | 0.3326  |
| PBANKA_100370 | -0.0349 | -0.4601 | -0.1646 | -0.0901 | -0.2898 | -0.0193 | 0.0123  | 0.1918  | 0.6883  | 0.4898  | 0.678   | 0.6719  |
| PBANKA_135630 | -0.2752 | 0.1288  | -0.0885 | 0.0887  | 0.1286  | 0.2966  | 0.2851  | 0.3846  | 0.0559  | 0.1882  | -0.2962 | -0.0922 |
| PBANKA_113900 | 0.3048  | 0.4759  | 0.1395  | 0.252   | -0.1872 | -0.025  | 0.0985  | -0.0452 | -0.1443 | -0.5314 | -0.2974 | -0.8013 |
| PBANKA_010380 | -0.1484 | 0.4983  | 0.3168  | 0.0888  | 0.1287  | -0.1417 | -0.3214 | -0.734  | -1.3863 | -1.236  | -0.9475 | -1.3161 |
| PBANKA_146450 | 0.2146  | -0.1807 | -0.4755 | -0.2077 | -0.4735 | -0.5012 | -0.7661 | -0.0207 | 0.6657  | 1.0003  | 0.9583  | 1.6311  |
| PBANKA_094130 | -0.314  | -0.4261 | -0.1601 | -0.3133 | -0.0575 | -0.4442 | -0.0699 | 0.4774  | 0.8443  | 0.6282  | 1.0251  | 0.7671  |
| PBANKA_133350 | 0.1391  | -0.1582 | -0.011  | 0.185   | -0.2207 | 0.1925  | 0.1859  | 0.2542  | 0.3142  | -0.1103 | -0.0657 | 0.2176  |
| PBANKA_091760 | 0.1481  | 0.3738  | 0.4849  | 0.103   | 0.0718  | -0.4259 | 0.2778  | -0.0307 | 0.3591  | 0.0716  | 0.0498  | 1.1391  |
| PBANKA_092110 | 0.7563  | 0.1138  | 0.0302  | 0.6273  | 0.1536  | -0.0584 | 0.037   | -0.1128 | -0.0883 | -0.197  | -0.21   | -0.1458 |
| PBANKA_010550 | 0.1027  | -0.4101 | 0.1556  | 0.3989  | 0.3847  | 0.3239  | 0.0122  | -0.6655 | -0.6622 | -1.1972 | -1.2201 | -0.8103 |
| PBANKA_081860 | 0.2334  | 0.818   | 0.0158  | 0.47    | -0.0527 | 0.0345  | 0.1224  | 0.043   | 0.1676  | 0.1334  | -0.3093 | 0.4987  |
| PBANKA_110740 | 0.3822  | 0.6251  | 0.2695  | -0.4716 | 0.1371  | -0.1893 | -0.1102 | -0.016  | -0.2744 | 0.1941  | 0.4366  | 0.849   |
| PBANKA_093500 | -0.2354 | 0.4916  | -0.1792 | -0.1561 | 0.2094  | -0.3533 | 0.0941  | 0.6865  | -0.1924 | 0.1148  | -0.7518 | -0.7478 |
| PBANKA_081900 | -2.1866 | -0.384  | -1.9668 | -1.562  | -1.1202 | -0.5729 | -0.0389 | 0.3527  | 0.2249  | 1.1442  | 0.7618  | 0.7003  |
| PBANKA_061350 | 0.521   | -1.756  | 0.0211  | 0.3077  | 0.0898  | 0.3302  | 0.0325  | -0.4951 | -0.4212 | -0.878  | -0.4992 | -1.3169 |
| PBANKA_132410 | -0.2137 | 0.2407  | 0.4242  | 0.0816  | 0.5699  | -0.1292 | -0.4368 | -0.9591 | -0.5962 | -1.1529 | -0.9405 | -0.7786 |
| PBANKA_081700 | -0.71   | -0.4443 | -0.3048 | -0.5938 | 0.0217  | -0.3829 | 0.0786  | 0.2962  | 0.4246  | 0.795   | 0.7024  | 0.4662  |
| PBANKA_060760 | -0.1065 | -0.0041 | 0.1122  | 0.5345  | 0.383   | 0.6396  | -0.1999 | -0.345  | -2.0088 | -1.0421 | -0.6524 | -1.2086 |
| PBANKA_030240 | -0.6148 | -0.1194 | -0.57   | -0.6477 | -0.144  | 0.2272  | -0.0433 | 0.3969  | 0.4623  | 0.6514  | 0.1909  | 0.0852  |
| PBANKA_124260 | -0.1777 | 0.3823  | 0.0298  | -0.6867 | 0.0339  | 0.2124  | 0.1524  | -0.0449 | -0.5459 | -0.9824 | 0.0877  | -1.3433 |
| PBANKA_122850 | 0.1771  | 0.3348  | -0.0594 | 0.5692  | 0.1944  | 0.474   | 0.069   | -0.0108 | -0.0557 | -0.1936 | -0.3083 | -0.4961 |
| PBANKA_080130 | -1.3197 | -1.2138 | -0.3298 | -0.0168 | -0.1193 | 0.5496  | 0.7685  | 0.9266  | 0.9653  | 0.8226  | -0.1724 | -0.2878 |
| PBANKA_113660 | 0.3587  | -0.2092 | 0.4215  | 0.7066  | 0.4019  | 0.4722  | 0.4474  | -0.0993 | -0.2938 | -0.6738 | -0.4536 | -0.2197 |
| PBANKA_123400 | -0.4004 | -0.3738 | -0.1774 | 0.0716  | 0.1722  | 0.3151  | 0.2828  | 0.0644  | -0.1975 | -0.5188 | -1.0385 | -1.2605 |
| PBANKA_092880 | 0.2379  | 0.4325  | 0.3417  | 0.1628  | 0.1156  | 0.3427  | -0.0313 | 0.236   | -0.2487 | -0.1985 | 0.318   | 0.3007  |
| PBANKA_030450 | -0.0031 | -0.3013 | 0.0129  | -0.0075 | -0.8372 | -0.1502 | 0.2345  | 0.4348  | 0.9556  | 0.817   | 0.7394  | 0.3581  |
| PBANKA_101340 | -0.2163 | 0.3454  | -0.0434 | 0.2081  | 0.0668  | 0.3274  | -0.0092 | 0.1236  | 0.4614  | 0.4928  | 0.4684  | 0.2849  |
| PBANKA_080900 | -0.0006 | 0.1775  | 0.2963  | 0.2019  | -0.2869 | 0.3076  | 0.0871  | 0.0246  | -0.0814 | -0.2045 | 0.0609  | 0.3395  |
| PBANKA_080100 | -0.3491 | 0.3179  | -0.0078 | 0.102   | -0.1816 | -0.2384 | -0.5541 | -0.7807 | -0.058  | 0.0273  | 0.7846  | 0.3426  |
| PBANKA_114190 | -1.1886 | -1.0789 | -0.8356 | -0.4747 | -0.0098 | -0.8352 | 0.1132  | 0.695   | 1.1635  | 1.2822  | 0.9201  | 0.2561  |
| PBANKA_050220 | 0.2129  | 0.677   | 0.2744  | 0.6806  | 0.4128  | 0.5421  | 0.2453  | -0.2331 | -0.0917 | -0.3326 | -0.7435 | -0.7062 |
| PBANKA_112190 | 0.1984  | 0.0239  | 0.352   | 0.9875  | 0.3407  | 0.5095  | 0.0527  | -0.1741 | -1.024  | -1.0482 | -1.0382 | -1.0744 |
| PBANKA_030840 | -0.2294 | -1.4173 | 0.2405  | 0.862   | 0.8091  | 0.7646  | 0.568   | -0.0058 | -0.0472 | -1.0426 | -0.7811 | -0.7942 |
| PBANKA_141540 | -0.3798 | -0.2766 | -0.3657 | -0.4285 | -0.1956 | -0.209  | -0.42   | -0.5158 | -0.6316 | -0.2396 | -0.6497 | -0.4264 |



|               |         |         |         |         |         |         |         |         |         |         |         |         |
|---------------|---------|---------|---------|---------|---------|---------|---------|---------|---------|---------|---------|---------|
| PBANKA_081400 | -0.0426 | -0.0326 | -0.4498 | -0.1273 | -0.3999 | -0.5083 | -0.8698 | -0.5663 | 0.5703  | 0.6773  | 1.0204  | 1.7066  |
| PBANKA_083270 | -0.4867 | -1.8288 | -0.8466 | -0.179  | 0.0567  | 0.174   | -0.0775 | 0.0555  | 0.7213  | 0.6411  | 0.7899  | 0.5734  |
| PBANKA_114060 | 0.1868  | 0.3049  | 0.1748  | 0.2658  | 0.1191  | -0.4608 | -0.4496 | -0.7356 | -0.5857 | -0.7371 | 0.2164  | 0.3772  |
| PBANKA_142330 | -0.1752 | 0.1609  | 0.3194  | -0.167  | 0.7716  | -0.2175 | -0.666  | -1.13   | -1.3178 | -1.1474 | -0.6712 | -0.7383 |
| PBANKA_133710 | 0.3444  | 0.2902  | 0.3509  | -0.1557 | 0.2261  | 0.035   | -0.4472 | -0.7451 | -0.7423 | -0.6166 | -0.4122 | -0.8794 |
| PBANKA_071080 | 0.0282  | 0.2415  | 0.0145  | 0.3457  | 0.1279  | 0.2922  | -0.2608 | 0.017   | -0.2482 | -0.3355 | -0.1509 | -0.1013 |
| PBANKA_082130 | 0.741   | 0.9242  | 0.3506  | 0.7884  | 0.7531  | -0.1531 | 0.0281  | 0.4571  | 0.0144  | -0.2828 | -0.557  | 0.8514  |
| PBANKA_051000 | -1.1885 | -1.1286 | -0.6135 | -0.1974 | 0.1318  | 0.4553  | 0.6525  | 0.4393  | 0.4616  | 0.1471  | -1.1568 | -0.9113 |
| PBANKA_030940 | 0.1166  | 0.0907  | -0.0126 | -0.2844 | 0.0584  | 0.1669  | 0.0523  | 0.0632  | -0.1189 | -0.0133 | -0.2307 | -0.4087 |
| PBANKA_144800 | 0.4793  | 0.4085  | 0.4735  | 0.2992  | 0.2585  | -0.0482 | -0.2672 | -0.3696 | -0.5924 | -1.1277 | -0.8442 | -1.0781 |
| PBANKA_030080 | -0.8777 | 0.2275  | -0.25   | -0.4309 | -0.3774 | 0.2889  | -0.1102 | -0.0365 | -0.5986 | -0.3021 | -0.4099 | -0.4883 |
| PBANKA_010930 | -0.5255 | -0.0088 | -0.0598 | 0.6909  | 0.1507  | 0.4797  | -0.5062 | 0.2851  | 0.0061  | 0.1448  | -0.0448 | -0.4428 |
| PBANKA_081720 | 0.536   | 0.6041  | 0.7434  | -0.2526 | 0.5479  | 0.3021  | -0.2922 | 0.0403  | -0.1485 | -0.5374 | -0.0961 | -0.0365 |
| PBANKA_111310 | 0.533   | -0.0645 | 0.8336  | 0.4369  | -0.1599 | 0.5931  | 0.1151  | -0.0474 | -0.6982 | -1.0429 | -0.9032 | -0.5375 |
| PBANKA_110190 | 0.3965  | 0.6304  | 0.1555  | 0.2275  | 0.4693  | 0.4529  | 0.021   | -0.5337 | -0.0958 | -0.5281 | -0.2595 | -0.1452 |
| PBANKA_146500 | -0.7248 | -0.4754 | -1.0339 | -0.8284 | -0.8476 | -0.9167 | -0.5835 | -0.1757 | 0.4941  | 1.2849  | 1.5763  | 2.0447  |
| PBANKA_143870 | 0.43    | -0.3237 | 0.5023  | 0.4669  | 0.1728  | -0.0334 | -0.014  | -0.1868 | -0.445  | -0.713  | -0.1912 | -0.5354 |
| PBANKA_130310 | -0.5009 | -0.6702 | -0.2136 | -0.2528 | -0.1211 | -1.0388 | 0.03    | -0.9157 | -0.247  | -0.2357 | -0.4741 | -0.0352 |
| PBANKA_091640 | 0.0112  | 0.6304  | 0.4166  | 0.0641  | 0.3106  | -0.1859 | 0.1112  | -0.4233 | -0.3041 | -0.1399 | 0.133   | 0.5515  |
| PBANKA_112090 | -0.0398 | -0.24   | -0.179  | -0.1981 | 0.0658  | -0.0122 | 0.1059  | 0.2985  | 0.7395  | 0.4595  | 0.5998  | 0.8635  |
| PBANKA_114500 | 0.2236  | 0.0647  | 0.1616  | 0.3185  | 0.4105  | -0.2743 | 0.1329  | 0.2697  | -0.0299 | -0.0149 | -0.1107 | 0.2624  |
| PBANKA_140790 | 0.2287  | 0.2937  | 0.0876  | -0.1586 | 0.0732  | -0.1959 | -0.4057 | -0.2183 | 0.0138  | -0.0307 | 0.3526  | 0.4567  |
| PBANKA_133340 | 0.1698  | -0.1474 | -0.007  | 0.3071  | -0.066  | 0.2961  | -0.005  | 0.0215  | 0.4679  | 0.3184  | 0.3192  | 0.6174  |
| PBANKA_145540 | 0.3486  | -0.4641 | 0.0529  | 0.068   | -0.4157 | 0.4024  | 0.0074  | 0.1793  | 0.2756  | 0.187   | 0.282   | -0.2607 |
| PBANKA_030400 | 0.5003  | 0.1253  | 0.2137  | 0.3919  | 0.1977  | 0.069   | 0.0076  | 0.0053  | -0.1066 | -0.3019 | -0.1461 | -0.0048 |
| PBANKA_123820 | 0.5321  | 0.326   | 0.0777  | -0.0596 | -0.0365 | -0.136  | -0.5405 | -0.2428 | -0.7027 | -0.0779 | 0.3882  | 0.4473  |
| PBANKA_080800 | -1.0731 | -0.4129 | -1.0204 | -0.136  | -0.0266 | 0.2706  | 0.5307  | 0.5192  | 0.328   | 0.9356  | -0.0238 | -0.5656 |
| PBANKA_113790 | -1.0412 | -1.1036 | -0.4599 | 0.1358  | 0.1549  | 0.3451  | 0.421   | 0.3606  | -0.3914 | -0.5323 | -0.8961 | -1.0736 |
| PBANKA_030330 | 0.0573  | 0.3442  | 0.2471  | -0.1226 | 0.221   | 0.361   | 0.2379  | 0.1083  | 0.2127  | 0.1299  | 0.2319  | 0.0632  |
| PBANKA_112220 | -0.3948 | -0.7379 | 0.013   | 0.1657  | 0.381   | -0.6693 | 0.3908  | 0.3808  | 0.0672  | -0.0115 | -0.5475 | -0.6911 |
| PBANKA_070350 | 0.4949  | 0.1647  | 0.0123  | 0.9349  | 0.1041  | 0.5078  | -0.322  | 0       | 0.3099  | 0.1366  | 0.8255  | 1.2209  |
| PBANKA_052080 | 0.2819  | 0.0038  | 0.1483  | 0.3289  | -0.0815 | 0.3815  | 0.266   | -0.2704 | -0.3786 | -0.497  | -0.7136 | -0.2664 |
| PBANKA_113010 | -0.004  | -0.3464 | 0.2483  | 0.477   | 0.6935  | 0.4283  | 0.1555  | -0.3629 | -0.4324 | -0.8076 | -0.813  | -0.6442 |
| PBANKA_122120 | 0.6464  | 0.2976  | 0.3602  | 0.256   | 0.0544  | -0.2514 | -0.0191 | 0.0121  | -0.4812 | -0.7166 | -0.218  | -0.7959 |
| PBANKA_135700 | 0.1038  | 0.3867  | 0.2432  | 0.1597  | 0.2528  | 0.0197  | 0.335   | -0.3011 | -0.4087 | -0.4783 | -0.5145 | -0.8941 |
| PBANKA_133810 | -0.4225 | -0.8233 | -0.099  | -0.0651 | 0.1367  | 0.0146  | -0.1327 | 0.1321  | 0.4926  | 0.3823  | 0.5483  | 1.5292  |
| PBANKA_136420 | 0.3642  | 0.4942  | 0.5375  | 0.3425  | 0.2365  | -0.083  | -0.4641 | -0.693  | -0.7405 | -0.9972 | -0.5024 | -0.1729 |
| PBANKA_111630 | -0.0885 | -0.2898 | 0.2509  | 0.287   | -0.1031 | 0.4263  | 0.1548  | 0.2117  | -0.1119 | 0.1763  | 0.1558  | -0.4427 |
| PBANKA_135800 | -0.1033 | -0.6184 | -0.1955 | -0.0424 | -0.2086 | -0.0848 | -0.3502 | -0.1276 | 0.2717  | 0.4009  | 0.5513  | 1.1541  |
| PBANKA_123880 | -0.0438 | 1.227   | -0.2771 | -0.3392 | -0.128  | -0.65   | -0.4359 | -1.1022 | -0.7454 | -0.4029 | 0.746   | 0.8638  |
| PBANKA_091830 | 0.3531  | 0.1443  | 0.3628  | -0.1532 | 0.3582  | 0.2309  | -0.257  | -0.1208 | -0.1761 | -0.2945 | -0.1345 | 0.3646  |
| PBANKA_051980 | -0.2687 | -0.237  | 0.0571  | -0.0244 | 0.0178  | 0.1186  | 0.3845  | 0.2801  | -0.0446 | -0.0595 | -0.6445 | -0.8459 |
| PBANKA_122710 | 0.4106  | -0.1765 | -0.105  | -0.2063 | -0.2313 | -0.7031 | -0.7336 | -0.0735 | 0.328   | 0.7809  | 0.9232  | 1.1559  |
| PBANKA_134660 | 0.0503  | 0.5163  | 0.1261  | 0.0291  | 0.0383  | -0.0595 | -0.1204 | -0.4891 | -1.0415 | -0.5665 | -0.5085 | -0.9873 |
| PBANKA_051760 | -0.1807 | -0.2629 | -0.2163 | -0.0595 | -0.2486 | -0.9923 | -0.7081 | -0.9611 | -0.0414 | 0.0899  | 0.854   | 1.2534  |
| PBANKA_114540 | -0.8549 | -0.3746 | -1.4732 | -1.3416 | -1.3634 | -1.4043 | -1.0804 | -0.1914 | 0.6929  | 1.0996  | 2.0715  | 1.8934  |
| PBANKA_121800 | -0.2623 | -0.0344 | -0.6279 | -0.672  | -0.8417 | -0.8404 | -0.507  | -0.0236 | 0.65    | 1.1081  | 1.4778  | 1.6324  |
| PBANKA_114520 | 0.1531  | 0.6258  | -0.0454 | -0.4336 | 0.2682  | -0.0714 | 0.0892  | -0.2217 | 0.0005  | 0.1143  | 0.2857  | 0.7418  |
| PBANKA_030060 | 0.0032  | 0.0939  | -0.2454 | -0.2903 | -0.7488 | -0.453  | -0.7311 | -0.3735 | 0.3938  | 0.7984  | 1.0112  | 1.3963  |
| PBANKA_051130 | 0.9076  | -0.0392 | 0.5209  | 0.3552  | 0.2513  | -0.4286 | -0.123  | -0.3235 | -0.4634 | -0.4548 | -0.187  | -0.3319 |
| PBANKA_060130 | -0.0139 | -0.0166 | -0.0574 | -0.4044 | -0.1566 | 0.7544  | 0.1956  | 0.2423  | 0.2442  | 0.5332  | 0.1409  | 0.4193  |
| PBANKA_123210 | 0.2449  | 0.0607  | -0.084  | -0.472  | -0.2175 | -0.329  | -0.7701 | -0.5307 | -0.6215 | 0.2273  | 1.0512  | 1.0415  |
| PBANKA_143940 | -0.6647 | -0.5865 | -0.4499 | -0.0203 | 0.0734  | 0.0687  | 0.5837  | 0.4455  | 0.4064  | 0.2544  | -0.3222 | -0.2169 |
| PBANKA_050680 | 0.3995  | 0.2151  | 0.1179  | -0.6918 | -0.5074 | -0.3931 | -0.3754 | -0.351  | -0.3978 | -0.3581 | -0.2742 | -0.9428 |
| PBANKA_091260 | -0.2637 | -0.1741 | -0.0187 | -0.0273 | 0.2664  | 0.4008  | 0.2054  | 0.5511  | 0.3301  | 0.3912  | 0.1963  | 0.2881  |
| PBANKA_123290 | 0.1245  | 0.0556  | 0.0384  | 0.1168  | 0.1126  | 0.0074  | 0.1339  | 0.165   | 0.0087  | 0.0013  | -0.2532 | 0.0102  |
| PBANKA_100870 | -0.0744 | -0.2359 | 0.1496  | -0.3727 | 0.3424  | -0.6907 | 0.3067  | 0.3464  | 0.3692  | 0.2823  | -0.2226 | -0.306  |
| PBANKA_143080 | -0.3388 | -0.4467 | -0.0568 | 0.5051  | 0.4661  | 0.4151  | 0.4998  | 0.1619  | 0.0167  | -0.3136 | -0.3627 | -0.7974 |
| PBANKA_134550 | -0.0914 | 0.0241  | 0.2535  | 0.4551  | 0.1607  | 0.6124  | 0.3467  | 0.3904  | 0.283   | -0.1783 | 0.032   | 0.3363  |
| PBANKA_030650 | -0.8112 | -0.981  | -0.2939 | -0.5751 | -0.2101 | -0.3518 | -0.5165 | -0.5885 | -0.7184 | -0.7261 | -0.1291 | -0.57   |
| PBANKA_130520 | -0.5384 | -0.1557 | -0.4777 | -0.38   | -0.2013 | 0.0076  | 0.2373  | 0.2862  | 0.429   | 0.7053  | 0.6794  | 0.4021  |
| PBANKA_142470 | -0.0252 | 0.0303  | 0.2282  | 0.4337  | 0.2854  | 0.563   | 0.2288  | -0.2129 | -0.3171 | -0.7448 | -0.612  | -0.7903 |
| PBANKA_121380 | -0.4921 | -0.5231 | -0.1972 | -0.2075 | 0.0322  | 0.3041  | 0.4346  | 0.1899  | -0.229  | -0.1692 | -0.5015 | -0.5581 |

|               |         |         |         |         |         |         |         |         |         |         |         |         |
|---------------|---------|---------|---------|---------|---------|---------|---------|---------|---------|---------|---------|---------|
| PBANKA_071010 | -0.5499 | -0.355  | -0.1632 | 0.134   | 0.1033  | 0.6509  | 0.6006  | 0.1823  | 0.0567  | -0.3148 | -0.902  | -0.7759 |
| PBANKA_120490 | 0.5216  | -0.2151 | 0.3987  | 0.5348  | 0.1816  | 0.4762  | -0.2632 | -0.1929 | -0.2133 | -1.1858 | -1.0991 | -0.6623 |
| PBANKA_141720 | -0.4397 | -1.3696 | -1.2975 | -1.2871 | -1.1795 | -0.8642 | -0.11   | 0.639   | 1.3657  | 1.6494  | 0.5896  | -1.5302 |
| PBANKA_131370 | -0.1836 | 0.7191  | -0.2175 | -0.2315 | -0.3966 | -0.2718 | 0.0463  | 0.1312  | -0.0072 | 0.4921  | 0.4294  | 0.6901  |
| PBANKA_080640 | -0.2965 | -0.6522 | -0.7601 | -0.6343 | -0.3469 | -0.0274 | -0.4344 | -0.8103 | -1.4562 | -0.7577 | -0.8482 | -0.9534 |
| PBANKA_101290 | 0.374   | 0.3229  | 0.2794  | 0.5654  | 0.2549  | 0.6221  | 0.3697  | 0.1048  | -0.0704 | -0.3661 | -0.9191 | -0.3049 |
| PBANKA_011200 | 0.0595  | -0.1176 | 0.0566  | 0.3959  | 0.2636  | 0.488   | 0.2443  | 0.3271  | 0.0616  | -0.254  | -0.921  | -0.8487 |
| PBANKA_134160 | 0.5694  | 0.5043  | 0.4578  | 0.3977  | 0.4235  | 0.8344  | 0.1688  | -0.0934 | -0.3192 | -0.8058 | -0.7367 | -0.038  |
| PBANKA_102320 | -0.1224 | 0.5697  | 0.151   | -0.3573 | 0.1347  | 0.4908  | -0.0863 | -0.34   | -0.4929 | -0.5962 | 0.034   | 0.0984  |
| PBANKA_135940 | 0.2152  | 0.0667  | 0.4241  | 0.0292  | -0.1785 | -2.1239 | -0.0304 | -0.4418 | -0.401  | -0.3635 | 0.2288  | 0.7069  |
| PBANKA_113780 | -0.3382 | -0.1731 | 0.0728  | -0.0338 | -0.0377 | 0.6164  | -0.2174 | 0.0221  | -0.277  | -0.1397 | -0.2259 | -0.5931 |
| PBANKA_071350 | 0.1376  | 0.3933  | 0.5927  | 0.175   | 0.4234  | 0.3218  | 0.1208  | 0.1351  | 0.0418  | -0.0507 | -0.1731 | -0.0093 |
| PBANKA_092390 | 0.1104  | 0.2784  | 0.2673  | 0.2847  | 0.2172  | 0.3277  | 0.1872  | 0.1449  | -0.4431 | -0.5787 | -0.1608 | -0.267  |
| PBANKA_141930 | -0.5917 | -0.8055 | -0.5043 | -0.7483 | -0.4039 | -0.7635 | -0.2654 | 0.2287  | 0.0294  | 0.1765  | 0.2797  | 0.7215  |
| PBANKA_135380 | -0.1649 | -0.9425 | -0.1866 | 0.3642  | 0.1208  | -0.1419 | -0.2108 | 0.1307  | 0.2536  | 0.3066  | 0.1967  | 0.8232  |
| PBANKA_133250 | -0.1892 | -0.5512 | -0.6119 | -0.0218 | -0.1953 | -0.5897 | -0.026  | -0.592  | -0.1459 | -0.0394 | 0.7536  | 1.1629  |
| PBANKA_082000 | -0.1971 | -0.5699 | 0.1612  | 0.8747  | 0.1498  | 0.54    | 0.4128  | 0.1055  | -0.0366 | -0.5144 | -0.8916 | -0.6989 |
| PBANKA_090500 | 0.0834  | 0.8087  | 0.1805  | 0.2047  | -0.1354 | -0.0502 | 0.2718  | -0.2316 | -0.7479 | -0.3842 | -0.2374 | -0.0765 |
| PBANKA_030120 | -0.4202 | -0.2449 | -0.255  | 0.0058  | -0.0188 | 0.5319  | 0.143   | 0.0631  | -0.1332 | -0.0976 | -0.0396 | 0.0616  |
| PBANKA_134190 | -0.1877 | -0.035  | -0.3308 | -0.4105 | -0.3592 | -0.4235 | -0.0953 | -0.9531 | -0.5637 | -0.2319 | -0.5585 | 0.4003  |
| PBANKA_090510 | -0.2315 | 0.4351  | -0.0457 | -0.2701 | 0.2548  | -0.2455 | -0.0833 | -0.2257 | -0.3568 | -0.015  | 0.0358  | -0.4716 |
| PBANKA_080980 | 0.1217  | 0.2143  | 0.0249  | 0.2248  | 0.147   | 0.6682  | 0.1271  | 0.1169  | 0.3158  | -0.2417 | -0.3529 | -0.2235 |
| PBANKA_091380 | 0.3053  | 0.3202  | -0.1423 | -0.0276 | 0.0608  | -0.4819 | 0.0791  | -0.1762 | -0.2974 | -0.3661 | -0.4757 | 0.7663  |
| PBANKA_060320 | -0.0845 | -0.1608 | 0.2691  | 0.297   | 0.6976  | 0.2384  | 0.2388  | -0.2193 | -0.5317 | -0.8069 | -0.9309 | -0.7356 |
| PBANKA_134070 | -0.8327 | -0.7569 | -1.1654 | -0.7616 | -0.5728 | -0.2881 | 0.3144  | 0.5356  | 1.0058  | 1.8871  | 0.5039  | -0.0746 |
| PBANKA_130760 | -0.262  | 0.2439  | 0.0695  | 0.4068  | 0.1303  | 0.3866  | 0.185   | -0.4573 | -0.3623 | -0.69   | -1.1612 | -1.6537 |
| PBANKA_136290 | 0.1579  | 0.1265  | -0.3127 | -0.0425 | -0.1744 | 0.0531  | -0.1999 | -0.6688 | -0.5103 | -0.6436 | -0.5953 | -1.1133 |
| PBANKA_142410 | 0.0268  | 0.1306  | 0.2983  | 0.006   | 0.0557  | 0.3052  | 0.2063  | -0.3344 | -1.1881 | -1.1632 | -1.3906 | -1.1419 |
| PBANKA_031380 | -0.548  | -0.4953 | -0.261  | 0.152   | 0.3776  | 0.5362  | 0.2966  | 0.1447  | -0.2351 | -0.559  | -0.6311 | -1.0111 |
| PBANKA_102430 | -0.0551 | -0.2405 | -0.5571 | -0.3956 | -0.8871 | -0.5241 | -0.6963 | -0.285  | 0.3642  | 0.9484  | 1.0193  | 1.4027  |
| PBANKA_114150 | -0.2782 | -0.0801 | -0.4014 | 0.4958  | 0.2221  | 0.3093  | 0.2525  | 0.5694  | 0.4016  | 0.3826  | 0.4759  | 0.0581  |
| PBANKA_102510 | -0.0811 | 0.3575  | 0.3047  | -0.09   | 0.3663  | 0.4176  | 0.0609  | -0.0758 | -0.1912 | 0.0057  | -0.331  | -0.425  |
| PBANKA_113820 | 0.3115  | 0.7158  | 0.382   | 0.0033  | 0.2729  | 0.1659  | -0.0717 | 0.0658  | -0.0643 | -0.1074 | -0.0131 | 0.2572  |
| PBANKA_101030 | 0.247   | 0.5833  | 0.1379  | -0.0947 | -0.0637 | -0.7076 | -0.2349 | -0.1387 | -0.1387 | 0.2973  | 0.7351  | 0.7484  |
| PBANKA_143240 | 0.4424  | 0.5119  | -0.1254 | -0.5533 | -0.0328 | -0.9402 | -0.4804 | -0.408  | -0.2626 | 0.1277  | 0.1444  | 0.2183  |
| PBANKA_010740 | -0.4561 | -0.0121 | 0.0232  | 0.1431  | 0.2686  | 0.1856  | -0.2628 | -0.4572 | -0.7466 | -0.8149 | -0.1757 | -1.1558 |
| PBANKA_092060 | 0.3358  | 0.1388  | 0.1289  | -0.1451 | 0.0327  | -0.1634 | -0.3126 | 0.0006  | 0.1924  | 0.0584  | 0.2679  | -0.1626 |
| PBANKA_144200 | 0.0086  | -0.1042 | 0.0887  | 0.4506  | 0.0036  | -0.0433 | 0.0189  | 0.0542  | -0.2811 | 0.5829  | -0.8976 | -0.0706 |
| PBANKA_136170 | 0.3477  | -0.493  | 0.2148  | 0.4889  | 0.3531  | 0.5193  | 0.213   | -0.1922 | -0.2751 | -1.134  | -1.2392 | -0.641  |
| PBANKA_031020 | -0.1798 | 0.0822  | 0.0817  | -0.0016 | 0.1763  | 0.3161  | 0.0232  | 0.2045  | -0.4979 | -0.2702 | -0.3815 | -0.3352 |
| PBANKA_110560 | -0.0637 | -0.0101 | -0.0827 | 0.2237  | -0.0416 | 0.5445  | 0.1344  | -0.0552 | 0.2343  | -0.1303 | 0.325   | -0.2994 |
| PBANKA_091280 | -0.2618 | -0.3162 | -0.0287 | 0.2843  | -0.2286 | -1.0927 | -0.2658 | -0.118  | 0.1359  | -0.2485 | 0.2607  | 0.1585  |
| PBANKA_091000 | 0.0134  | 0.0807  | -0.4473 | 0.3044  | -0.564  | 0.2887  | -0.4052 | -0.1957 | 0.4878  | 0.4107  | 0.7147  | 0.6535  |
| PBANKA_110460 | 0.0927  | 0.4195  | 0.0189  | -0.025  | -0.0378 | 0.0653  | -0.2721 | -0.0336 | 0.1398  | 0.5717  | 0.7387  | 0.9455  |
| PBANKA_051630 | 0.3889  | 0.3771  | 0.3855  | 0.6013  | 0.5485  | 0.51    | 0.0955  | -0.2819 | -0.429  | -0.7871 | -0.4543 | -0.7073 |
| PBANKA_102990 | 0.5101  | 0.6286  | 0.2407  | 0.1765  | -0.1707 | -0.1494 | -0.2242 | -0.2941 | -0.8428 | -0.6601 | -0.6048 | -0.2506 |
| PBANKA_122560 | 0.2141  | 0.0509  | 0.5153  | 0.5638  | 0.2893  | 0.6892  | -0.2884 | -0.5941 | -0.5374 | -0.6745 | -0.29   | -0.5267 |
| PBANKA_120430 | -0.6121 | -0.375  | -0.0667 | 0       | 0.0939  | 0.3509  | 0.2243  | -0.1987 | -0.591  | -0.8697 | -0.8956 | -0.5023 |
| PBANKA_142690 | 0.42    | 0.6884  | 0.0353  | -0.121  | -0.1446 | -0.1386 | -0.3003 | -0.7842 | -0.5525 | -0.141  | 0.4096  | 0.8885  |
| PBANKA_123000 | -0.1834 | 0.3736  | 0.5633  | 0.2509  | 0.063   | 0.4328  | 0.1289  | -0.0577 | 0.0929  | 0.0697  | 0.2906  | 0.0467  |
| PBANKA_040400 | 0.4091  | 0.7581  | 0.3997  | 0.315   | 0.1976  | 0.4312  | 0.0217  | -0.1319 | 0.3999  | 0.2428  | 0.574   | 0.9094  |
| PBANKA_090880 | -1.0134 | -0.3766 | -0.6471 | -1.2106 | -0.2802 | -0.3465 | -0.0666 | 0.1846  | -0.1596 | 0.3039  | -0.2663 | -0.2602 |
| PBANKA_030360 | -0.1333 | 1.0722  | -0.0938 | -0.0181 | -0.1939 | -0.2169 | 0.0475  | -0.2725 | -0.3978 | -0.1036 | 0.5147  | -0.1001 |
| PBANKA_092570 | -0.3349 | -0.379  | -0.0704 | -0.1214 | 0.0299  | 0.0285  | -0.0259 | 0.3416  | 0.104   | 0.1883  | 0.1283  | 0.0808  |
| PBANKA_092500 | 0.1393  | -0.2584 | -0.0334 | 0.0187  | -0.0383 | 0.2286  | 0.1475  | 0.1994  | 0.5299  | 0.4883  | -0.3553 | -0.3411 |
| PBANKA_090790 | 0.0677  | -0.1767 | 0.1748  | -0.0523 | -0.1075 | 0.3707  | 0.0737  | 0.1322  | 0.0686  | 0.4299  | 0.8937  | 0.2574  |
| PBANKA_090120 | -0.3881 | -0.3968 | 0.098   | 0.2651  | 0.372   | 0.7692  | 0.37    | 0.0624  | -0.0406 | -0.4962 | -0.7658 | -0.2638 |
| PBANKA_121860 | -0.3136 | -0.4881 | 0.0152  | 0.1137  | 0.3072  | 0.4228  | 0.168   | -0.2642 | -0.1305 | -0.4367 | -0.2019 | -0.2865 |
| PBANKA_081650 | 0.1252  | 0.4722  | -0.1141 | -0.0595 | 0.0636  | 0.3234  | -0.2674 | -0.2202 | -0.3414 | -0.2891 | -0.3434 | -0.2243 |
| PBANKA_083380 | -0.0833 | -0.0246 | 0.0308  | 0.0034  | -0.0033 | -0.3473 | 0.2039  | 0.0738  | 0.3424  | 0.3625  | 0.0157  | -0.0574 |
| PBANKA_131480 | 0.1231  | 1.0139  | 0.3846  | -0.3076 | 0.623   | -0.1677 | -0.8542 | -0.9928 | -1.7602 | -1.7487 | -0.8602 | -1.1172 |
| PBANKA_146110 | -0.831  | 0.0014  | -0.5101 | -0.6585 | -0.3165 | -0.3074 | -0.0313 | -0.2933 | -0.1664 | 0.1837  | 0.4504  | 1.0236  |
| PBANKA_092960 | 0.2832  | 0.2224  | -0.107  | -0.15   | -0.5399 | -0.0669 | -0.2735 | -0.3431 | -0.2464 | -0.0091 | 0.6902  | 0.8288  |

|               |         |         |         |         |         |         |         |         |         |         |         |         |
|---------------|---------|---------|---------|---------|---------|---------|---------|---------|---------|---------|---------|---------|
| PBANKA_124520 | -0.3834 | -0.469  | 0.0263  | 0.0653  | 0.2418  | 0.3664  | 0.1838  | -0.0859 | -0.0799 | -0.1854 | 1.0207  | 1.4377  |
| PBANKA_112660 | -0.456  | -0.7503 | -0.0638 | 0.1644  | 0.0329  | 0.5929  | 0.2598  | -0.2657 | -0.0753 | -0.4793 | -0.9537 | -0.4863 |
| PBANKA_142660 | -0.9592 | -0.8782 | -1.0302 | -0.714  | -0.1857 | -0.2441 | 0.3313  | 0.547   | 0.8189  | 0.8783  | 0.4714  | 0.0089  |
| PBANKA_093770 | 0.5707  | 0.878   | 0.454   | 0.2084  | 0.0606  | -0.0206 | -0.0337 | -0.2403 | -0.5798 | -0.7797 | -0.5249 | 0.0233  |
| PBANKA_081280 | -0.2538 | 0.3298  | -0.0483 | 0.1138  | -0.0422 | 0.1211  | -0.2    | -0.1863 | -0.4101 | -0.7181 | -0.7827 | -0.3038 |
| PBANKA_110210 | 0.1991  | 1.7048  | -0.0653 | -0.0323 | 0.2862  | 0.4294  | -0.0216 | 0.2509  | 0.5365  | 0.2993  | 0.6515  | 0.6524  |
| PBANKA_010290 | -0.6675 | -1.108  | -0.6533 | -1.038  | -0.3746 | -0.3772 | 0.3349  | 0.8887  | 1.0571  | 1.2739  | 0.336   | -0.4641 |
| PBANKA_112530 | -0.1471 | 0.0952  | 0.0066  | -0.0434 | 0.1683  | 0.0682  | 0.2997  | 0.0884  | 0.1483  | 0.3305  | 0.0399  | 0.3474  |
| PBANKA_131160 | 0.3367  | -0.3192 | 0.2937  | 0.1257  | 0.0892  | -0.0517 | -0.0306 | 0.4927  | 0.5714  | 0.3545  | 0.4024  | 0.4238  |
| PBANKA_135760 | -0.2223 | 0.8634  | -0.1537 | -0.7418 | -0.1197 | 0.0132  | 0.1401  | -0.1885 | -0.0548 | -0.0803 | 0.3017  | 0.1448  |
| PBANKA_124460 | 0.0172  | 0.8278  | 0.43    | 0.0446  | 0.1478  | 0.0494  | 0.1368  | -0.0701 | -0.351  | -0.2916 | -0.4991 | -0.0531 |
| PBANKA_083150 | 0.0161  | 0.6151  | 0.0432  | 0.0252  | 0.0237  | 0.0712  | 0.0224  | -0.0285 | -0.2042 | -0.3237 | 0.0713  | -0.3737 |
| PBANKA_131440 | 0.4914  | -0.0181 | -0.0876 | -0.1321 | -0.0459 | -0.4228 | -0.2596 | 0.0016  | 0.209   | 0.2772  | 0.3394  | -0.1261 |
| PBANKA_011100 | -1.0333 | -0.8637 | -0.9872 | -0.6491 | -0.3788 | 0.2536  | 0.595   | 0.7177  | 0.9794  | 1.3513  | 0.3347  | 0.1344  |
| PBANKA_132980 | -0.9852 | -0.2908 | -0.1371 | -0.1633 | -0.0312 | 0.5627  | 0.056   | 0.0797  | 0.2625  | 0.4375  | 1.0506  | 1.2511  |
| PBANKA_050750 | -0.0677 | 0.5475  | 0.1738  | 0.0265  | 0.2051  | 0.2262  | -0.0464 | -0.2826 | -0.6758 | -0.4375 | -0.3612 | -0.5896 |
| PBANKA_143280 | 0.3095  | 0.8178  | -0.2904 | 0.0592  | -0.2291 | -0.5606 | -0.5045 | -0.2493 | 0.1153  | 0.5998  | 0.4933  | 1.4118  |
| PBANKA_146130 | -0.4152 | 0.4105  | -0.4027 | -0.0938 | -0.2076 | -0.2636 | -0.2573 | -0.4721 | 0.496   | 0.5445  | 1.2883  | 1.3452  |
| PBANKA_061090 | 0.4334  | 0.1796  | 0.2873  | 0.0007  | 0.0374  | -0.14   | -0.498  | -0.8033 | -0.7098 | -0.8397 | -0.786  | -0.113  |
| PBANKA_140370 | -0.3221 | -0.0672 | 0.0406  | 0.0393  | 0.2129  | -0.1589 | -0.3727 | -0.5133 | -0.7227 | -1.0896 | -0.0941 | -0.9116 |
| PBANKA_123720 | -0.3553 | -0.4133 | -0.0774 | 0.0351  | 0.2613  | 0.3575  | 0.0398  | -0.3214 | -0.5011 | -0.8117 | -1.0817 | -0.9705 |
| PBANKA_145240 | -0.254  | 0.1972  | -0.1408 | 0.1164  | 0.3262  | 0.6921  | 0.3988  | 0.3418  | 0.0093  | 0.0112  | 0.1071  | 0.0708  |
| PBANKA_145270 | -0.3412 | -0.1737 | -0.1752 | 0.1679  | -0.0666 | -0.6894 | -0.006  | 0.5028  | 0.7315  | 1.024   | 0.8312  | 1.0871  |
| PBANKA_100270 | 0.017   | -0.5104 | -0.3594 | -0.8685 | -0.4279 | -0.4706 | -0.339  | -0.0791 | 0.281   | 0.4469  | 0.8169  | 1.4351  |
| PBANKA_080850 | 0.5413  | 0.7251  | 0.3149  | 0.7137  | 0.3725  | 0.7184  | 0.3394  | 0.2468  | -0.1354 | -0.1356 | -0.481  | 0.1281  |
| PBANKA_021290 | -0.5377 | -0.0385 | -0.0954 | 0.2121  | 0.0955  | 0.2804  | 0.4816  | 0.1795  | 0.0545  | -0.1663 | -0.5581 | -1.056  |
| PBANKA_111910 | 0.2034  | -0.0393 | 0.1431  | 0.2443  | 0.3908  | 0.335   | 0.2856  | 0.031   | 0.2131  | -0.0266 | 0.0016  | 0.3451  |
| PBANKA_112310 | -0.495  | -0.555  | -0.4315 | -0.1149 | 0.0599  | 0.1377  | 0.6381  | 0.5001  | 0.3673  | -0.0709 | -0.4627 | -0.4614 |
| PBANKA_020740 | -0.0675 | -0.0842 | 0.1572  | -0.1579 | 0.1712  | 0.2868  | 0.0195  | 0.072   | -0.4535 | -0.1722 | -0.4676 | -0.5005 |
| PBANKA_134200 | -0.2799 | -1.3052 | -0.2369 | -0.0696 | 0.336   | 0.5434  | 0.0062  | 0.4393  | 0.3338  | 0.0083  | -0.6125 | -1.288  |
| PBANKA_132160 | 0.0933  | 0.491   | 0.1005  | 0.1007  | 0.0883  | 0.1488  | 0.0237  | 0.3128  | -0.0913 | -0.0482 | -0.2228 | -0.0425 |
| PBANKA_121580 | 0.3518  | 0.11    | 0.2093  | 0.3168  | 0.122   | 0.1267  | 0.1097  | 0.0086  | 0.0285  | -0.0544 | -0.3108 | 0.14    |
| PBANKA_050370 | -0.2708 | -0.1914 | -0.0027 | 0.0009  | 0.1018  | 0.5355  | 0.2816  | 0.0719  | 0.0536  | 0.0275  | -0.0358 | 0.1392  |
| PBANKA_062350 | -0.4505 | 0.3951  | -0.7617 | -0.8711 | -0.9775 | -0.8232 | -0.9086 | -0.2074 | 0.3987  | 0.9766  | 1.2333  | 1.838   |
| PBANKA_132190 | -0.7931 | -0.1834 | 0.189   | 0.2999  | 0.0654  | 0.3414  | 0.0807  | -0.2509 | -0.251  | -0.1876 | -1.118  | -0.7317 |
| PBANKA_135920 | 0.9023  | -0.205  | 0.4883  | 0.2003  | -0.0019 | -0.2744 | -0.5692 | -1.1375 | -0.8343 | -0.9511 | -0.3918 | 0.0152  |
| PBANKA_030820 | 0.4047  | -0.5081 | 0.0165  | 0.4455  | 0.3773  | 0.7114  | -0.6025 | -0.0376 | 0.0367  | -0.1079 | 0.9102  | 0.7248  |
| PBANKA_020620 | 0.2827  | -0.342  | -0.143  | 0.2742  | 0.1653  | -0.1922 | 0.1343  | -0.1868 | -0.3278 | -0.5162 | 0.313   | -2.1716 |
| PBANKA_142020 | 0.0632  | 0.5408  | 0.1911  | 0.0135  | 0.1973  | 0.6221  | -0.2776 | -0.011  | -0.3237 | -0.3512 | -0.1352 | -0.3196 |
| PBANKA_103290 | -0.2229 | -0.4027 | -0.6004 | -0.2699 | -0.1012 | 0.1665  | 0.4564  | 0.4995  | 0.5715  | 0.4363  | 0.2286  | -0.1312 |
| PBANKA_040540 | 0.0601  | 0.5687  | 0.3855  | 0.5725  | 0.3402  | 0.1187  | -0.4691 | -0.6489 | -0.8569 | -1.4183 | -0.7119 | 0.0665  |
| PBANKA_140800 | 0.1302  | 0.3731  | 0.164   | -0.0553 | -0.1773 | 0.4591  | -0.0292 | -0.1259 | -0.3087 | -0.1029 | -0.1554 | 0.2563  |
| PBANKA_080460 | 0.6916  | 0.6808  | 0.7535  | 0.5473  | 0.2544  | 0.3001  | 0.1087  | -0.2923 | -0.2564 | -0.2724 | -0.1355 | 0.6512  |
| PBANKA_113750 | -0.5667 | -1.5267 | -0.5189 | -0.3409 | 0.0235  | -0.3092 | -0.0982 | 0.1837  | 0.4117  | 0.5646  | 0.1797  | 0.6248  |
| PBANKA_142610 | 0.1223  | -0.3269 | 0.277   | 0.0703  | 0.3161  | 0.5929  | -0.1126 | -0.3202 | -0.7254 | -0.5582 | -0.5265 | -0.6941 |
| PBANKA_040970 | -0.1179 | -0.6007 | -0.6972 | -0.1404 | -0.2911 | -0.131  | 0.0115  | 0.3514  | 0.0265  | 0.121   | 1.0524  | 0.6498  |
| PBANKA_144870 | 0.5395  | -0.2143 | 0.2207  | 0.436   | -0.1986 | 0.0607  | -0.2341 | -0.0035 | 0.2248  | 0.3249  | 0.3601  | 0.3302  |
| PBANKA_061390 | -0.1    | 0.5273  | 0.0317  | 0.2465  | -0.2883 | -0.1072 | -0.6068 | -0.2482 | 0.3613  | 0.5377  | 1.0968  | 1.4521  |
| PBANKA_124030 | 0.0208  | 0.6996  | 0.1829  | -0.0581 | 0.2897  | 0.1761  | 0.0335  | -0.1554 | -0.0127 | 0.1752  | 0.255   | 0.6503  |
| PBANKA_051720 | 1.004   | 0.8922  | 0.4317  | 0.6051  | -0.0114 | -0.0309 | -0.2693 | -0.6135 | -0.6286 | -0.8081 | -0.8511 | -0.1613 |
| PBANKA_120120 | -0.2195 | 0.01    | 0.0913  | -0.2141 | -0.072  | 0.4331  | -0.1886 | -0.1157 | 0.1569  | -0.0092 | -0.5614 | -0.1851 |
| PBANKA_123360 | -0.327  | -0.8101 | -0.9635 | 0.0883  | -0.6495 | -0.3022 | -0.3399 | -0.152  | 0.5157  | 0.7203  | 1.4275  | 1.5719  |
| PBANKA_123610 | 0.0634  | -0.8347 | -0.1303 | -0.2084 | -0.7386 | -0.2821 | -0.872  | -0.2959 | -0.851  | -0.755  | -0.4648 | -0.7402 |
| PBANKA_051960 | 0.061   | 0.2784  | 0.0547  | 0.0684  | 0.1267  | -0.0956 | 0.1489  | -0.2518 | -0.5554 | -1.1242 | -1.2748 | -1.3386 |
| PBANKA_080520 | 0.1234  | 0.3882  | 0.1405  | -0.0675 | -0.1432 | -0.4266 | -0.2969 | -0.4232 | -0.336  | -0.333  | 0.3306  | -0.0608 |
| PBANKA_071550 | -0.7136 | -0.5041 | -0.6353 | -0.1567 | 0.0253  | -0.0126 | 0.3556  | -0.16   | 0.0082  | -0.0615 | -0.8357 | -1.2968 |
| PBANKA_071290 | 0.2775  | 0.2413  | -0.2264 | -0.3244 | -0.4079 | -0.7779 | -0.2569 | -0.1618 | 0.4224  | 0.7581  | 1.2083  | 1.4058  |
| PBANKA_142870 | 1.0637  | 0.3828  | 0.3554  | 0.2032  | 0.2472  | -0.2199 | -0.7791 | -0.7131 | -0.9164 | -0.566  | -0.3123 | -0.6321 |
| PBANKA_061440 | 0.1019  | 0.778   | 0.0763  | -0.0468 | 0.119   | -0.0633 | -0.1411 | -0.5084 | -0.1987 | -0.2018 | -0.1276 | -0.5659 |
| PBANKA_113840 | 0.2991  | -0.9472 | -0.1171 | 0.2352  | -0.2297 | 0.2139  | 0.1371  | 0.8502  | 0.1362  | 0.2946  | -0.4233 | -0.1096 |
| PBANKA_103910 | 0.6945  | 0.0861  | 0.5748  | 0.3788  | 0.3043  | -0.6298 | -0.107  | -0.3921 | -0.3614 | -0.6287 | -0.3815 | -0.3738 |
| PBANKA_145600 | 0.2246  | 0.0731  | 0.467   | 0.5783  | 0.6148  | -0.6659 | -0.0728 | -0.3243 | -0.3661 | -1.1053 | -1.1683 | -0.8679 |
| PBANKA_020810 | 0.2826  | 0.6553  | 0.3953  | 0.4289  | 0.0987  | -0.0936 | -0.2523 | -0.4618 | -0.8092 | -0.5562 | -0.4521 | -0.4465 |

|               |         |         |         |         |         |         |         |         |         |         |         |         |
|---------------|---------|---------|---------|---------|---------|---------|---------|---------|---------|---------|---------|---------|
| PBANKA_100500 | 0.3433  | 0.6145  | 0.1593  | -0.0451 | -0.3389 | -0.2892 | -0.4734 | -0.5557 | -0.8541 | -0.1134 | 0.8742  | 0.9901  |
| PBANKA_100240 | -0.3829 | -0.5417 | -0.2644 | -0.3263 | -0.0261 | -0.8356 | 0.4108  | 0.5275  | 0.5681  | 0.9004  | 0.5366  | 0.5382  |
| PBANKA_090580 | 0.0471  | -0.1641 | -0.2344 | 0.1793  | 0.1592  | 0.3072  | 0.384   | 0.1814  | 0.0718  | -0.1515 | -0.6401 | -1.0586 |
| PBANKA_132670 | -0.1109 | 0.6488  | 0.159   | -0.0795 | 0.1105  | -0.2937 | 0.1532  | -0.1958 | -0.1615 | -0.257  | -0.3551 | -0.5    |
| PBANKA_051535 | -0.1004 | 0.2814  | 0.0534  | 0.377   | 0.0051  | 0.6164  | 0.4107  | 0.3814  | 0.1495  | 0.1674  | 0.2588  | 0.0579  |
| PBANKA_041780 | -0.9429 | -0.4052 | -1.1528 | -0.7528 | -0.6358 | -0.4448 | 0.0573  | 0.6123  | 0.8923  | 2.0544  | -0.2194 | -0.5149 |
| PBANKA_133550 | 0.1599  | 0.1891  | 0.0558  | 0.7209  | -0.1656 | 0.617   | -0.3481 | -0.1489 | -0.0644 | -0.2631 | -0.0949 | -0.4565 |
| PBANKA_110820 | -0.246  | -0.0957 | -0.1728 | -0.2713 | -0.1255 | 0.1162  | 0.1111  | 0.2412  | 0.5401  | 0.6898  | -0.1388 | -0.8999 |
| PBANKA_140190 | 0.0331  | 0.0369  | -0.1106 | -0.0512 | -0.4102 | 0.0566  | 0.1238  | -0.3927 | 0.3765  | 0.3683  | 0.7169  | 1.3102  |
| PBANKA_135200 | 0.2911  | 0.4738  | 0.5036  | 0.3803  | 0.6738  | 0.2141  | -0.0968 | -0.6551 | -1.1715 | -1.3178 | -1.1158 | -1.3829 |
| PBANKA_121390 | 0.3062  | -0.6879 | 0.2668  | 0.4165  | 0.6496  | 0.7165  | 0.2968  | 0.1308  | -0.077  | -0.6691 | -0.5402 | -0.5631 |
| PBANKA_040780 | 0.5743  | 0.5654  | 0.296   | 0.0991  | 0.0952  | -0.2757 | -0.124  | 0.1487  | -0.221  | -0.1511 | -0.5445 | -0.311  |
| PBANKA_113150 | 0.0022  | -0.5379 | 0.1454  | 0.1128  | 0.3228  | 0.0662  | 0.3167  | 0.4996  | 0.0581  | -0.0025 | -0.3823 | -0.3071 |
| PBANKA_010500 | -0.3285 | 0.1598  | -0.2947 | -0.0972 | -0.0372 | -0.0423 | 0.5034  | 0.5208  | 0.1411  | 0.0519  | -0.1874 | -0.0079 |
| PBANKA_070810 | -0.3886 | -0.1538 | 0.053   | 0.1976  | 0.2813  | 0.1564  | 0.1288  | 0.139   | 0.303   | 0.2821  | 0.3438  | 1.1114  |
| PBANKA_134010 | -0.1991 | 0.0525  | -0.2551 | 0.2724  | 0.518   | 0.4502  | 0.0651  | -0.3325 | -0.6468 | -1.0367 | -1.373  | -1.3235 |
| PBANKA_091220 | 0.6852  | 0.4172  | 0.3916  | 0.2767  | 0.375   | -0.9351 | -0.0106 | -0.4836 | -0.854  | -0.8455 | -0.7466 | -0.6872 |
| PBANKA_111340 | -0.2172 | -0.1696 | -0.3131 | 0.1961  | -0.1429 | -0.7878 | 0.071   | 0.1856  | 0.4778  | 0.6924  | 0.5166  | 0.1406  |
| PBANKA_100520 | 0.3207  | -0.0281 | 0.2502  | 0.3244  | 0.1208  | -0.3045 | 0.3944  | -0.0679 | -0.0274 | -0.415  | -1.0074 | -0.5939 |
| PBANKA_021150 | -0.1109 | 0.2796  | 0.4649  | 0.5316  | 0.5297  | 0.3829  | 0.213   | -0.5041 | -0.777  | -0.5688 | -0.9549 | -1.378  |
| PBANKA_123060 | -0.0069 | -0.3478 | 0.0279  | 0.4583  | 0.0946  | 0.2148  | -0.0551 | -0.4214 | 0.176   | -0.0178 | 0.1096  | -0.6977 |
| PBANKA_103740 | -0.6974 | -0.9113 | -1.1501 | -0.5541 | -0.999  | -0.2204 | -0.1663 | 0.2885  | 0.7855  | 1.3425  | 1.2882  | 1.4664  |
| PBANKA_114280 | 0.2078  | 0.076   | 0.351   | -0.1494 | 0.1111  | -0.1532 | -0.4068 | -0.6417 | -0.7363 | -0.9654 | -0.7125 | -0.5969 |
| PBANKA_134410 | -0.1185 | -0.1468 | -0.1104 | -0.1754 | -0.3041 | -0.5727 | -0.018  | 0.301   | -0.0289 | 0.0634  | 0.2303  | -0.5197 |
| PBANKA_051940 | -1.7473 | -1.1634 | -1.8818 | -1.2296 | -0.7876 | 0.0161  | 0.63    | 1.0691  | 1.0718  | 1.0493  | 0.2022  | -0.4405 |
| PBANKA_090360 | -0.0572 | 0.3407  | 0.1834  | 0.1835  | 0.0822  | 0.625   | 0.1412  | -0.0484 | -0.2299 | -0.0974 | 0.1751  | -0.2281 |
| PBANKA_100930 | -0.6821 | 0.8636  | 0.2102  | 0.2143  | 0.3671  | 0.0996  | -0.1727 | -0.0601 | -0.0852 | -0.1344 | 0.2478  | 0.2224  |
| PBANKA_140870 | -1.1239 | -0.6178 | -0.9541 | -0.2796 | -0.3385 | 0.1695  | 0.364   | 0.4237  | 1.2372  | 1.2274  | 0.7305  | 0.3839  |
| PBANKA_090660 | -0.9245 | 0.1771  | 0.3827  | 0.2672  | 0.3959  | 0.4466  | -0.089  | 0.0624  | -0.0313 | 0.1177  | 0.0274  | 0.4113  |
| PBANKA_146330 | 0.0205  | 0.284   | -0.4415 | -0.0343 | -0.314  | -0.3535 | -0.2036 | 0.0211  | 0.5507  | 0.7747  | 1.1813  | 1.4155  |
| PBANKA_113830 | -0.0662 | -0.1605 | -0.1991 | 0.2574  | 0.0738  | -0.09   | -0.0005 | -0.4774 | -0.04   | -0.0701 | -0.168  | -0.5833 |
| PBANKA_130800 | -0.1423 | -0.0323 | 0.0846  | -0.2296 | -0.0489 | -0.0735 | 0.1047  | 0.3705  | 0.4349  | 0.5431  | 0.4359  | 0.2728  |
| PBANKA_121590 | 0.0798  | 0.5245  | 0.1101  | 0.0402  | 0.2166  | -0.08   | 0.1819  | 0.1559  | 0.153   | 0.2414  | -0.2652 | 0.1955  |
| PBANKA_124100 | 0.1801  | 0.6843  | 0.22    | 0.164   | 0.2282  | 0.3711  | -0.0131 | -0.0828 | 0.0342  | -0.1848 | 0.2547  | 0.1133  |
| PBANKA_020990 | 0.3783  | 0.4232  | 0.1589  | -0.0749 | 0.1645  | 0.3658  | -0.1646 | -0.9496 | -0.9934 | -1.1612 | -1.1127 | -0.7847 |
| PBANKA_060490 | -0.2633 | -0.849  | -0.5921 | -0.3233 | -0.4267 | -0.1799 | 0.2315  | 0.9405  | 0.7718  | 1.2934  | 0.4754  | -0.4548 |
| PBANKA_136260 | 0.5439  | 0.6306  | 0.1605  | 0.554   | 0.0089  | -0.0726 | -0.1182 | -0.3825 | -0.305  | -0.1295 | 0.1681  | 0.1213  |
| PBANKA_124620 | 0.5354  | 0.7766  | -0.0212 | 0.4942  | -0.0271 | -0.0363 | -0.1236 | -0.0768 | 0.1995  | 0.3313  | 1.4622  | 0.5955  |
| PBANKA_062290 | -1.5558 | -1.145  | -1.9139 | -1.5335 | -1.7936 | -1.1478 | 0.3248  | 0.8983  | 1.6352  | 1.5026  | 0.9718  | 0.3571  |
| PBANKA_134270 | 0.3134  | -0.2267 | -0.0337 | 0.0648  | 0.2131  | -0.3209 | 0.2013  | 0.4834  | 0.6644  | 0.5836  | 0.0762  | 0.1953  |
| PBANKA_143730 | -0.2953 | -0.1159 | -0.0353 | 0.4977  | 0.3688  | 0.4964  | 0.3014  | -0.0583 | -0.4225 | -0.5541 | -1.3973 | -1.3059 |
| PBANKA_081590 | -0.2112 | 0.026   | -0.1442 | 0.0138  | -0.7337 | 0.3591  | 0.4941  | 0.4964  | 0.6175  | 0.447   | -0.054  | -0.6158 |
| PBANKA_071260 | -0.6457 | -0.4182 | -0.0911 | 0.1184  | 0.376   | 0.5309  | 0.7081  | 0.3737  | -0.3889 | -0.4836 | -1.6674 | -0.9251 |
| PBANKA_101470 | -0.4232 | -0.3032 | -0.5673 | -1.0069 | -0.1637 | -0.1679 | -0.2157 | 0.2483  | -0.7286 | -0.2082 | -0.5148 | -0.6022 |
| PBANKA_141890 | -0.1017 | 0.2735  | 0.1562  | 0.0443  | 0.0668  | -0.1998 | -0.0858 | -0.0751 | -0.6016 | -0.6541 | -0.7316 | -0.383  |
| PBANKA_134780 | 0.2844  | 0.3601  | 0.1217  | 0.0866  | 0.0761  | 0.1561  | -0.0043 | -0.4445 | -0.3822 | -0.506  | -0.4004 | -0.0525 |
| PBANKA_021110 | 0.1647  | 0.6479  | 0.0449  | -0.0516 | -0.0126 | 0.6335  | -0.0163 | -0.077  | 0.0318  | -0.1054 | 0.029   | -0.5795 |
| PBANKA_093200 | -0.6293 | -0.2948 | -0.4717 | -0.2794 | -0.1656 | 0.2124  | -0.1435 | 0.3393  | 0.5409  | 0.7895  | 1.2802  | 0.5049  |
| PBANKA_080710 | 0.5622  | -0.0387 | 0.4047  | 0.5836  | 0.2283  | 0.4542  | 0.2364  | 0.0447  | -0.2557 | -0.6342 | -0.4775 | 0.0556  |
| PBANKA_133110 | -1.0131 | 0.068   | -0.4494 | -0.0863 | 0.0168  | 0.2133  | 0.5034  | 0.3208  | -0.04   | -0.0379 | -0.3321 | -0.3428 |
| PBANKA_091190 | -0.0592 | 0.2658  | 0.3009  | 0.2147  | 0.1138  | 0.1835  | -0.0215 | -0.0087 | 0.004   | -0.1334 | -0.4875 | -0.462  |
| PBANKA_112060 | 0.6918  | 0.6448  | 0.3506  | 0.6384  | 0.0664  | -0.1232 | 0.0376  | -0.6506 | -0.6707 | -0.5994 | 0.0592  | -0.2694 |
| PBANKA_114400 | 0.0626  | -0.0578 | 0.1185  | 0.5227  | 0.2626  | 0.3743  | 0.2608  | 0.1074  | -0.3889 | -0.3417 | -0.7575 | -1.1621 |
| PBANKA_142780 | -0.0141 | -0.106  | 0.148   | -0.128  | 0.1268  | 0.3527  | 0.0901  | 0.1361  | -0.0814 | -0.0239 | -0.0566 | -0.223  |
| PBANKA_101940 | 0.5359  | 0.3789  | 0.2486  | 0.3176  | -0.0128 | 0.2879  | 0.0712  | 0.1066  | -0.1256 | -0.3614 | -0.704  | -0.3321 |
| PBANKA_140920 | -1.5419 | -1.3447 | -1.4872 | -1.0163 | -0.6814 | -0.5444 | 0.3255  | 0.6271  | 1.2642  | 1.4512  | 1.0822  | 0.7893  |
| PBANKA_091910 | -0.0626 | 0.1652  | -0.191  | -0.2589 | -0.3313 | 0.0667  | 0.0334  | -0.0437 | 0.3751  | 0.8249  | 0.8645  | 1.4784  |
| PBANKA_080880 | 0.2533  | -0.4584 | 0.0129  | 0.677   | 0.3695  | 0.2719  | -0.2609 | -0.1361 | -0.2831 | -0.6004 | -0.8144 | -0.9556 |
| PBANKA_051850 | -0.9253 | -0.2765 | -0.6729 | -0.8494 | -0.2052 | -0.1883 | 0.0554  | 0.2992  | 0.4862  | 0.359   | 0.6381  | 0.5065  |
| PBANKA_131540 | -0.9037 | -0.7762 | -0.5489 | -0.0268 | 0.0874  | 0.1647  | 0.3621  | 0.2124  | 0.2063  | 0.2665  | -0.2864 | -0.5289 |
| PBANKA_072130 | 0.2576  | 0.3133  | 0.0536  | 0.2873  | -0.4181 | 0.4608  | -0.1653 | -0.3063 | 0.0924  | -0.0753 | -0.2645 | 0.4284  |
| PBANKA_130060 | -0.2145 | -0.0135 | 0.1739  | 0.028   | -0.1062 | 0.1369  | 0.0285  | -0.3678 | -0.1704 | 0.1122  | -0.2087 | 0.1389  |
| PBANKA_131930 | -0.3803 | -0.1437 | -0.4619 | -0.3564 | 0.066   | -0.1115 | 0.0675  | 0.1421  | 0.0752  | 0.5455  | -0.083  | -0.3133 |

|               |         |         |         |         |         |         |         |         |         |         |         |         |
|---------------|---------|---------|---------|---------|---------|---------|---------|---------|---------|---------|---------|---------|
| PBANKA_030500 | -1.8405 | -1.2351 | -1.8243 | -1.2467 | -0.4864 | -0.0087 | 0.6745  | 1.1619  | 0.8983  | 1.2539  | 0.5243  | -0.4295 |
| PBANKA_111690 | -0.5793 | -0.438  | -0.4238 | -0.3602 | -0.1438 | 0.0054  | 0.0214  | 0.1777  | 0.3133  | 0.4525  | 0.0768  | -0.2782 |
| PBANKA_121300 | 0.3603  | -0.0027 | 0.0415  | 0.3135  | 0.1502  | -0.4336 | -0.1817 | -0.0485 | 0.1257  | 0.4616  | 0.3792  | 0.3869  |
| PBANKA_041610 | -1.068  | -0.4181 | -0.4198 | -0.3376 | -0.1875 | -0.8742 | -0.073  | 0.505   | 0.943   | 1.1735  | 0.7536  | 0.2208  |
| PBANKA_120660 | -0.4426 | 0.1121  | 0.2368  | -0.1467 | 0.5836  | 0.2153  | -0.2468 | -0.3955 | -0.8393 | -1.0388 | -0.7513 | -1.2275 |
| PBANKA_062080 | -0.4447 | 0.4082  | -0.0345 | -0.4845 | -0.3318 | -0.2935 | -0.5976 | 0.311   | 0.0708  | 0.3643  | 1.0051  | 0.1896  |
| PBANKA_090330 | -0.054  | 0.7174  | -0.1548 | 0.2182  | 0.3353  | 0.0972  | -0.0329 | 0.0513  | 0.1362  | 0.1096  | -0.0647 | 0.0244  |
| PBANKA_144550 | 0.4351  | -0.0842 | -0.0315 | -0.0683 | -0.0921 | -0.2502 | -0.2203 | -0.1439 | -0.3325 | -0.0758 | 0.9165  | 0.4305  |
| PBANKA_111440 | 0.1789  | 0.7059  | 0.0858  | 0.1016  | -0.1985 | -0.1433 | -0.0096 | 0.4134  | -0.1385 | 0.2186  | 0.5525  | 0.6026  |
| PBANKA_040530 | -0.1117 | 0.1996  | 0.273   | -0.0488 | 0.3391  | -0.2125 | -0.3872 | -1.0316 | -1.1427 | -1.3433 | -0.1367 | -0.1003 |
| PBANKA_093950 | -0.9675 | -1.5625 | -0.461  | -0.0663 | -0.0449 | -0.1611 | 0.2825  | 0.3178  | 0.18    | -0.3054 | -0.6084 | -0.3108 |
| PBANKA_050630 | 0.3196  | 0.1088  | 0.0456  | -0.0406 | 0.212   | 0.1502  | -0.3541 | -0.1592 | 0.2345  | 0.4956  | 0.868   | 0.8008  |
| PBANKA_031150 | -0.4314 | 0.0935  | -0.6414 | -0.5463 | -0.4286 | -0.3033 | 0.0777  | 0.1698  | 0.8163  | 0.9837  | 0.7745  | 0.9051  |
| PBANKA_144170 | 0.0909  | 0.6176  | 0.1932  | 0.2329  | -0.5344 | 0.1907  | 0.1631  | -0.1149 | -0.4395 | 0.0305  | 0.5944  | 0.8988  |
| PBANKA_130490 | 0.1821  | 0.516   | 0.2458  | -0.0272 | 0.0239  | -0.2893 | -0.4119 | -0.5738 | -0.1483 | -1.0115 | -0.2717 | -0.4746 |
| PBANKA_060890 | 0.2491  | -0.9631 | 0.1122  | 0.3712  | 0.0998  | 0.339   | -0.0272 | -0.2052 | -0.3991 | -0.4766 | -0.2482 | -0.7007 |
| PBANKA_102780 | 0.4473  | 0.196   | 0.3075  | 0.5343  | 0.0576  | 0.4936  | 0.0299  | -0.1851 | 0.3648  | 0.0276  | -0.1188 | 0.0541  |
| PBANKA_010020 | 0.0203  | 0.4057  | 0.3565  | 0.422   | 0.4419  | 0.4024  | -0.2429 | -0.6694 | -0.6972 | -0.8111 | -0.2444 | -0.4715 |
| PBANKA_100140 | 0.2402  | 0.3071  | -0.0918 | -0.0236 | 0.1184  | -0.139  | -0.1453 | -0.3752 | -0.3975 | -0.2839 | -0.2431 | -0.7173 |
| PBANKA_020210 | 0.6348  | -0.5919 | 0.1303  | 0.8951  | 0.3892  | 0.552   | -0.4093 | -0.7344 | -0.734  | -0.7125 | -0.4033 | -0.9285 |
| PBANKA_020940 | 0.2671  | -0.0011 | 0.3281  | 0.2574  | 0.2278  | 0.4548  | 0.0189  | -0.1884 | -0.088  | -0.521  | -0.6629 | 0.299   |
| PBANKA_083450 | -0.387  | -0.0425 | 0.0095  | 0.19    | 0.162   | -0.0011 | 0.3131  | 0.3083  | 0.1012  | -0.1195 | -0.1552 | 0.0326  |
| PBANKA_052260 | 0.5278  | 0.613   | 0.3944  | 0.4795  | 0.2422  | 0.384   | -0.0461 | -0.0646 | -0.0097 | -0.1569 | -0.1296 | -0.4473 |
| PBANKA_094040 | 0.1762  | 0.6824  | 0.2026  | -0.168  | -0.6573 | 0.1242  | -0.3548 | -1.034  | -0.9613 | -0.9252 | -0.3407 | -1.2481 |
| PBANKA_133750 | -0.065  | 0.2858  | 0.0112  | -0.0036 | 0.1172  | 0.1819  | -0.0647 | 0.1482  | 0.2307  | 0.2561  | 0.2301  | 0.0691  |
| PBANKA_123160 | 0.2638  | -0.0522 | -0.1281 | 0.0491  | -0.2565 | -0.4863 | -0.315  | 0.0543  | 0.2762  | 0.701   | 1.0231  | 0.9631  |
| PBANKA_041440 | 0.258   | 0.4242  | 0.1773  | 0.325   | 0.0225  | -0.0999 | -0.0538 | -0.175  | -0.572  | -0.4941 | -0.5972 | -0.3192 |
| PBANKA_070060 | 0.7238  | 0.6542  | 0.3273  | 0.222   | 0.1837  | 0.2137  | -0.3868 | -0.2749 | -0.0851 | -0.0883 | 0.3777  | 0.4297  |
| PBANKA_061430 | -0.6554 | -0.4606 | -0.1777 | -0.167  | -0.0352 | 0.5943  | 0.6179  | 0.0446  | 0.2152  | -0.0905 | -0.3362 | -0.6281 |
| PBANKA_120730 | 0.8157  | -0.6165 | 0.1121  | -0.09   | 0.0195  | 0.055   | -0.3409 | -0.2243 | -0.6747 | -0.7036 | -0.5428 | -0.3256 |
| PBANKA_060750 | 0.2611  | 0.1933  | 0.5684  | 0.2176  | 0.3352  | 0.0781  | 0.1293  | -0.1945 | -0.8667 | -1.0219 | -1.1533 | -0.718  |
| PBANKA_112680 | -0.274  | -0.1345 | -0.1539 | -0.231  | -0.0896 | -0.2228 | 0.0793  | 0.3846  | 0.4091  | 0.6462  | 0.6357  | 0.06    |
| PBANKA_031030 | -0.2951 | 0.2026  | 0.0381  | 0.1864  | 0.2724  | -0.4076 | 0.4885  | 0.151   | 0.026   | -0.0676 | -0.2914 | -0.2205 |
| PBANKA_114300 | -0.0777 | 0.7236  | -0.0242 | -0.4668 | 0.0069  | -0.5765 | -0.631  | -0.5116 | -1.029  | -0.7416 | -0.761  | -1.1843 |
| PBANKA_144690 | 0.089   | -0.5783 | -0.009  | 0.2363  | 0.3152  | 0.4884  | 0.4494  | 0.3462  | -0.4381 | -0.4752 | -0.8655 | -1.2142 |
| PBANKA_142490 | 0.0501  | 0.4704  | 0.3565  | 0.3623  | 0.1672  | -0.0491 | -0.0059 | -0.5493 | -0.4953 | -0.313  | -0.1312 | 0.3436  |
| PBANKA_062310 | 0.4865  | 0.7394  | -0.0469 | -0.3296 | -0.0997 | -0.0332 | -0.4152 | -0.103  | 0.1904  | 0.7796  | 0.2007  | 0.2659  |
| PBANKA_093060 | -0.5132 | 0.2569  | -0.1142 | -0.1309 | -0.0545 | -0.1502 | -0.4528 | 0.2109  | 0.0038  | 0.1157  | 0.1042  | -0.402  |
| PBANKA_092440 | -0.0932 | -0.6108 | -0.0675 | -0.0404 | 0.1211  | -0.1463 | -0.5241 | -0.7144 | -0.1783 | -0.2111 | 0.2799  | 1.0467  |
| PBANKA_111610 | -0.1647 | 0.2841  | 0.215   | 0.9193  | 0.2383  | 0.343   | 0.0696  | -0.0021 | -0.3197 | -0.1441 | -0.0355 | -0.5538 |
| PBANKA_133450 | 0.4656  | 0.7727  | 0.4904  | 0.356   | 0.3623  | 0.0022  | 0.2848  | -0.0988 | -0.2629 | -0.4961 | -0.8265 | -0.3582 |
| PBANKA_113920 | 0.1872  | 0.0353  | -0.112  | 0.1961  | -0.0995 | 0.4923  | 0.1025  | 0.0711  | -0.1368 | -0.2961 | -0.2051 | -0.2814 |
| PBANKA_143710 | -0.3803 | -0.8043 | -1.095  | -0.9301 | -0.8006 | -0.484  | -0.8676 | 0.0253  | 0.4779  | 0.8735  | 1.4499  | 1.675   |
| PBANKA_122080 | -0.1649 | -0.786  | -0.3741 | -0.1961 | -0.1771 | 0.2536  | 0.4564  | 0.6619  | 0.9109  | 1.0353  | -0.1808 | -0.602  |
| PBANKA_052310 | -0.3816 | 0.7273  | -0.1653 | -0.4656 | 0.1424  | -0.6021 | -0.157  | -0.4111 | -0.7196 | -0.2328 | 0.2724  | 0.3419  |
| PBANKA_093890 | 0.2327  | -0.0346 | -0.0569 | -0.4019 | -0.2206 | 0.3201  | -0.4486 | -0.7856 | -0.0403 | 0.1872  | -0.806  | -0.2435 |
| PBANKA_080530 | -0.0296 | 0.3203  | -0.0578 | 0.2462  | 0.1213  | 0.0853  | -0.0623 | -0.1009 | 0.1669  | -0.0782 | -0.5521 | 0.2466  |
| PBANKA_143250 | 0.4621  | 0.5272  | -0.1336 | -0.2557 | -0.115  | -0.4118 | -0.2123 | -0.2605 | 0.3117  | 0.7324  | 0.9092  | 1.3472  |
| PBANKA_140110 | 0.2732  | 0.2691  | 0.065   | -0.2872 | 0.0015  | 0.108   | -0.1867 | -0.3465 | -0.5486 | -0.246  | 0.0731  | 1.0119  |
| PBANKA_101260 | -0.0626 | 0.8833  | 0.1095  | 0.0206  | -0.0933 | 0.7675  | 0.1975  | 0.181   | 0.0494  | -0.176  | -0.6492 | 0.0556  |
| PBANKA_110750 | 0.1028  | -0.1006 | 0.0983  | 0.2231  | 0.0991  | 0.1335  | -0.2501 | -0.2592 | -0.3507 | -0.8409 | -0.8797 | -0.343  |
| PBANKA_083410 | 0.1057  | 0.1804  | 0.2678  | 0.1871  | 0.2105  | 0.4871  | 0.1606  | 0.182   | 0.2252  | 0.2328  | 0.3485  | 0.5821  |
| PBANKA_124180 | -0.8739 | -0.2932 | -0.7205 | -0.1609 | -0.0389 | 0.0506  | 0.5294  | 0.625   | 0.442   | 0.5319  | 0.2082  | -0.0296 |
| PBANKA_061820 | 0.4808  | 0.6138  | 0.4099  | 0.2495  | 0.2121  | 0.2505  | -0.1714 | -0.0409 | 0.0518  | -0.3302 | -0.3739 | -0.2543 |
| PBANKA_071020 | -0.0936 | -0.2151 | 0.1059  | -0.1334 | 0.1465  | -0.8721 | 0.2969  | -0.0033 | 0.1224  | -0.2332 | -0.2731 | 0.4171  |
| PBANKA_060450 | 0.2442  | 0.5681  | -0.0686 | -0.1735 | -0.1842 | -0.1123 | -0.4892 | -0.1872 | 0.2959  | 0.567   | 0.4879  | 0.9143  |
| PBANKA_122900 | 0.3568  | 1.0965  | 0.2911  | -0.3765 | -0.1672 | -0.2992 | -0.8388 | -0.5281 | -0.326  | 0.2074  | 0.9557  | 1.2683  |
| PBANKA_112600 | 0.065   | 0.0964  | -0.1914 | 0.0238  | 0.1176  | 0.3921  | 0.1581  | 0.1884  | 0.0267  | -0.1125 | -0.1211 | -0.1509 |
| PBANKA_062040 | -0.5696 | -0.3687 | -0.3061 | 0.0155  | 0.0419  | 0.2699  | 0.4221  | 0.2447  | 0.2274  | 0.2786  | 0.8362  | 0.3795  |
| PBANKA_133590 | -0.1268 | -0.1615 | 0.1092  | 0.0627  | 0.3761  | 0.425   | 0.5804  | 0.3676  | -1.6258 | -0.1561 | -0.5854 | -0.3612 |
| PBANKA_041120 | 0.2434  | 0.6077  | 0.2193  | -0.2345 | -0.0499 | -0.573  | 0.2548  | 0.7735  | -0.0508 | -0.2294 | -0.1779 | -0.6554 |
| PBANKA_093810 | 0.3549  | 0.2523  | 0.2366  | 0.1906  | -0.1957 | 0.2991  | -0.16   | -0.5438 | -0.5656 | -0.6231 | -0.1762 | 0.0526  |
| PBANKA_092550 | 0.135   | 0.0145  | 0.3847  | 0.5368  | 0.2737  | 0.146   | 0.0029  | -0.2101 | 0.0561  | -0.0408 | 0.0249  | 0.1075  |

|               |         |         |         |         |         |         |         |         |         |         |         |         |
|---------------|---------|---------|---------|---------|---------|---------|---------|---------|---------|---------|---------|---------|
| PBANKA_031220 | 0.0704  | -0.0031 | -0.3101 | -0.0879 | -0.7058 | -0.0609 | -0.5272 | -0.1432 | -0.3596 | -0.2569 | 0.1555  | 0.0652  |
| PBANKA_051780 | -0.0773 | -0.4197 | 0.1296  | -2.7875 | -0.5794 | -0.7369 | -0.7402 | -0.7353 | -1.2172 | -0.6245 | -0.8691 | -0.8509 |
| PBANKA_102850 | 0.0061  | -0.5938 | -0.3928 | -0.3995 | -0.5257 | -0.9558 | -0.1932 | 0.0062  | 0.4263  | 0.6363  | 0.4224  | 0.3072  |
| PBANKA_040660 | -0.7377 | -0.4331 | -0.8703 | -0.6955 | -0.5377 | -0.6854 | 0.1922  | 0.2647  | 0.9977  | 0.8567  | 0.2244  | 0.8153  |
| PBANKA_010150 | 0.209   | -0.4795 | -0.267  | 0.0506  | -0.0284 | 0.2204  | -0.3765 | -0.3751 | -0.3366 | -0.1798 | 0.3008  | -0.2046 |
| PBANKA_060590 | 0.4413  | 0.0099  | 0.2941  | -0.2511 | 0.0146  | 0.6165  | 0.2568  | -0.7514 | 0.3099  | 0.1672  | 0.0857  | 0.0663  |
| PBANKA_051320 | -0.0599 | 0.6127  | 0.1615  | -0.0858 | -0.1571 | -0.274  | -0.1117 | -0.3858 | -0.0111 | 0.0384  | 0.4083  | 0.9759  |
| PBANKA_070860 | 0.0369  | 0.7084  | 0.3964  | 0.428   | -0.2159 | 0.4655  | 0.1019  | -0.13   | -0.0512 | -0.4558 | -0.0457 | -0.3335 |
| PBANKA_100410 | -0.036  | -0.0152 | 0.1727  | 0.0824  | 0.1165  | 0.1857  | -0.0293 | 0.0183  | 0.076   | 0.1901  | 0.0765  | -0.1281 |
| PBANKA_060300 | -0.1126 | -0.5452 | 0.5215  | 0.5573  | 0.1234  | 0.2808  | 0.2232  | -0.0669 | 0.0793  | -0.1722 | -0.2017 | -0.047  |
| PBANKA_145000 | -0.1951 | -2.0161 | -0.4816 | -0.3429 | -0.2234 | -0.6984 | -0.1595 | -0.245  | -0.073  | 0.1074  | -0.2469 | 0.2152  |
| PBANKA_020130 | 0.2823  | 0.6196  | 0.0689  | 0.0451  | 0.2949  | -0.5961 | 0.0564  | -0.0335 | -0.3608 | -0.5108 | -0.135  | 0.0954  |
| PBANKA_091200 | 0.3122  | 0.612   | 0.1165  | 0.0576  | -0.0865 | 0.0827  | -0.3403 | -0.5341 | 0.1986  | 0.4181  | 0.7328  | 1.5385  |
| PBANKA_102040 | 0.0156  | 0.8303  | -0.0505 | -1.5254 | -0.5879 | -1.2152 | -0.6506 | -1.0229 | -0.3551 | 0.1685  | 1.6236  | 1.4869  |
| PBANKA_103320 | 0.4485  | 0.6513  | 0.4992  | 0.3514  | 0.193   | 0.0279  | 0.1353  | -0.3279 | -0.2982 | -0.0561 | 0.1565  | 0.2538  |
| PBANKA_133860 | 0.4086  | 0.146   | 0.3147  | 0.4199  | 0.1617  | 0.2696  | -0.2395 | -0.5999 | -0.3469 | -1.0697 | -1.1539 | 0.135   |
| PBANKA_112700 | -0.5715 | -0.0088 | -0.4727 | -0.6217 | -0.3038 | -0.1364 | -0.0064 | 0.1319  | 0.1343  | 0.647   | 0.6073  | 1.4415  |
| PBANKA_144680 | 0.2593  | 0.5177  | 0.4051  | 0.1929  | 0.4969  | -0.0482 | -0.1097 | -0.6036 | -1.0617 | -1.2305 | -1.2829 | -0.8096 |
| PBANKA_103710 | 0.7378  | 0.2867  | 0.6008  | 0.0725  | 0.2815  | 0.4815  | 0.1516  | -0.0712 | -0.2722 | -0.4116 | -0.7083 | -0.2634 |
| PBANKA_141550 | 0.3656  | -0.1883 | -0.2403 | 0.0179  | 0.1455  | 0.0338  | 0.1953  | 0.3293  | 0.1121  | -0.475  | -0.9301 | -0.2311 |
| PBANKA_103310 | -0.3931 | -1.3156 | -0.0231 | -0.5774 | -0.4118 | 0.2486  | 0.424   | 0.5208  | 0.5788  | 0.7575  | -0.0938 | -0.1262 |
| PBANKA_136410 | 0.3691  | 0.7394  | 0.1808  | 0.1038  | 0.1118  | 0.2821  | -0.2698 | -0.8103 | -0.7267 | -0.4714 | 0.4712  | 1.1142  |
| PBANKA_122950 | -0.0487 | 0.9937  | -0.2808 | -0.5157 | -0.0933 | 0.0334  | -0.0266 | -0.8296 | -0.0747 | -0.1908 | -0.1354 | -0.5376 |
| PBANKA_052020 | 0.4054  | 0.8187  | 0.1003  | -0.3308 | 0.2024  | -0.2994 | -0.2823 | -0.3166 | -0.7653 | -0.5612 | 0.4056  | 0.4032  |
| PBANKA_131760 | 0.2563  | 0.3172  | 0.1267  | -0.5173 | 0.1012  | -0.5113 | -0.134  | 0.0362  | 0.5111  | 0.5189  | 1.2255  | 1.3911  |
| PBANKA_113120 | 0.4167  | 0.5451  | 0.0482  | -0.3844 | -0.3953 | 0.0711  | 0.1829  | -0.0664 | 0.4594  | 0.3013  | 0.1961  | 0.8315  |
| PBANKA_144240 | -0.3716 | -0.1323 | -1.0372 | -0.8401 | -1.1377 | -0.9878 | -0.677  | -0.1871 | 0.5592  | 1.1275  | 0.9482  | 0.9264  |
| PBANKA_122470 | 0.2586  | -0.6064 | 0.1121  | 0.6039  | -0.0588 | 0.5488  | -0.3543 | 0.0303  | -0.5376 | -0.2265 | -0.3053 | -0.7736 |
| PBANKA_113430 | -0.2796 | 0.0977  | 0.0277  | 0.1     | 0.0172  | 0.4091  | 0.2094  | -0.0852 | 0.1289  | 0.2265  | -0.1528 | -0.1143 |
| PBANKA_113520 | 0.2281  | 0.3465  | 0.1489  | -0.1127 | 0.1011  | 0.1841  | 0.0763  | -0.434  | -0.8024 | -0.2438 | 0.3787  | -0.4757 |
| PBANKA_140080 | -0.5288 | 0.3425  | -0.185  | -0.4628 | -0.216  | 0.0783  | 0.0727  | 0.3544  | 0.7543  | 0.9149  | 1.004   | 0.6257  |
| PBANKA_040410 | -0.8715 | -0.7078 | -0.6678 | 0.029   | -0.1019 | 0.5848  | 0.3144  | 0.5611  | 0.4247  | 0.5335  | -0.3937 | -0.3269 |
| PBANKA_040180 | -0.0238 | 0.0294  | 0.2722  | 0.3144  | 0.0576  | 0.1835  | 0.2096  | -0.1304 | 0.1323  | -0.068  | -0.4041 | -0.6124 |
| PBANKA_122810 | -0.7847 | -0.6787 | -0.573  | -0.3668 | -0.0306 | 0.3371  | 0.2432  | 0.5413  | 0.756   | 0.9589  | 0.4194  | -0.2443 |
| PBANKA_051860 | -0.1042 | 0.6032  | 0.0203  | 0.5781  | -0.0022 | -0.0701 | 0.0368  | 0.3357  | -0.0108 | -0.0008 | -0.4763 | -0.24   |
| PBANKA_080300 | -0.4252 | -0.6711 | -0.3147 | -0.58   | 0.122   | 0.0514  | 0.6148  | 0.5482  | 0.7638  | 0.5916  | -0.3364 | -0.937  |
| PBANKA_071780 | 0.1685  | 1.0239  | 0.3901  | 0.2163  | -0.0138 | -0.2767 | -0.4104 | -0.691  | -0.6873 | -0.4041 | 0.5997  | 0.8941  |
| PBANKA_101180 | -0.1239 | 0.4165  | -0.235  | 0.1195  | -0.1318 | 0.3252  | 0.304   | 0.5684  | 0.7644  | 0.5829  | -0.0379 | 0.1272  |
| PBANKA_123910 | 0.9208  | 0.0419  | 0.0577  | 0.2308  | 0.0588  | 0.3647  | 0.1541  | 0.0082  | -0.3085 | -0.8739 | -0.1358 | -0.2754 |
| PBANKA_142120 | 0.5846  | -0.5535 | 0.1174  | 0.27    | 0.6412  | 0.5617  | 0.174   | 0.0056  | 0.1492  | -0.4472 | -1.1598 | -0.7403 |
| PBANKA_061370 | 0.1287  | 0.1301  | -0.1783 | -0.4551 | -0.3817 | -0.4671 | -0.5211 | -0.2361 | 0.1595  | 0.6402  | 0.905   | 1.1632  |
| PBANKA_083510 | -0.9503 | -0.8179 | -0.2314 | 0.5471  | 0.2833  | 0.573   | 0.5936  | 0.0293  | 0.0933  | -0.3203 | -0.9953 | -1.1542 |
| PBANKA_133960 | -0.2245 | 0.0188  | 0.3118  | 0.2955  | 0.1042  | 0.1977  | 0.1219  | -0.243  | -0.052  | -0.2982 | -0.6013 | -0.2465 |
| PBANKA_146460 | 0.0983  | 0.207   | -0.4233 | -0.242  | -0.2611 | 0.2878  | 0.101   | 0.2656  | 0.6139  | 0.8412  | 1.1746  | 0.9642  |
| PBANKA_100400 | 0.6571  | 0.3992  | 0.3625  | 0.2599  | 0.1412  | -0.3277 | -0.562  | -1.0493 | -1.4583 | -1.5036 | -1.1205 | -0.9648 |
| PBANKA_040700 | -0.205  | -0.2358 | 0.1556  | 0.3267  | 0.3233  | 0.4851  | 0.1441  | -0.6274 | -0.5424 | -1.1456 | -0.7858 | -1.0283 |
| PBANKA_030320 | 0.234   | 0.6729  | 0       | 0.2034  | 0.0013  | 0.1501  | 0.0942  | -0.0945 | -0.2467 | -0.3991 | -0.7996 | -0.9812 |
| PBANKA_100700 | 0.5174  | -0.0701 | 0.5112  | 0.2869  | -0.0316 | 0.1184  | -0.1625 | 0.0105  | -0.4804 | -0.6015 | -0.2484 | -0.5835 |
| PBANKA_010580 | -0.2214 | -0.5931 | 0.1221  | 0.6845  | -0.3327 | 0.2624  | 0.0958  | 0.2593  | -0.0719 | -0.1076 | -0.4344 | -0.0196 |
| PBANKA_041680 | 0.0483  | 0.1525  | -0.102  | -0.4149 | -0.1819 | 0.3354  | 0.6094  | 0.4424  | 0.0242  | -0.108  | -0.8655 | -0.7217 |
| PBANKA_102230 | -0.2998 | -0.427  | -0.442  | 0.9259  | 0.12    | 0.7557  | 0.126   | 0.4782  | 0.3951  | 0.259   | 0.8387  | 0.3855  |
| PBANKA_134510 | 0.119   | -0.0715 | 0.0174  | 0.2653  | 0.007   | 0.2253  | 0.058   | -0.1137 | -0.5254 | -0.677  | -0.7517 | -0.9856 |
| PBANKA_091860 | 0.0501  | 0.0213  | 0.2644  | -0.0811 | -0.0522 | -0.1396 | 0.1506  | 0.3217  | 0.3497  | 0.5139  | 0.5131  | 0.2481  |
| PBANKA_145990 | -0.1581 | 0.1959  | -0.0566 | 0.6574  | 0.2361  | 0.4975  | 0.3645  | 0.1165  | 0.0481  | -0.2323 | -0.8397 | -0.4145 |
| PBANKA_140740 | 0.1769  | 0.4676  | 0.2275  | 0.0996  | 0.1609  | 0.3555  | 0.0372  | 0.2898  | -0.0209 | 0.1219  | 0.5374  | 0.9872  |
| PBANKA_020670 | 0.568   | 0.1598  | 0.4599  | 0.4763  | -0.0347 | 0.397   | 0.4392  | 0.2909  | 0.3034  | 0.1274  | 0.472   | 0.4634  |
| PBANKA_140850 | -0.1822 | 0.2775  | -0.4847 | -0.1444 | -0.0962 | -0.1235 | 0.0828  | -0.1696 | -0.5703 | -0.531  | -0.5427 | -0.9399 |
| PBANKA_060340 | 0.2301  | 0.083   | 0.317   | 0.0355  | 0.1152  | 0.2288  | -0.1872 | -0.3155 | -0.5842 | -0.6538 | -0.3354 | -0.4193 |
| PBANKA_051620 | -0.5041 | -0.1843 | -0.3633 | -0.1213 | 0.2037  | 0.0778  | 0.2825  | -0.0403 | -0.1527 | -0.2708 | -0.6089 | -0.7437 |
| PBANKA_135810 | 0.1423  | 0.1683  | -0.3875 | -0.2972 | 0.2335  | -0.5113 | -0.3691 | -0.5017 | -0.4991 | -0.5033 | -0.4159 | -0.7084 |
| PBANKA_112650 | -0.0462 | 1.377   | 0.1568  | -0.4326 | -0.0856 | -0.3352 | -0.0809 | -0.6946 | -0.4452 | -0.5429 | -0.3897 | -0.1593 |
| PBANKA_100460 | -0.1095 | 0.0202  | -0.2132 | 0.2186  | 0.2429  | 0.4223  | 0.0874  | -0.1846 | 0.2212  | -0.1343 | -0.5169 | -0.4821 |
| PBANKA_112780 | 0.0235  | 0.4913  | 0.1548  | 0.076   | 0.3732  | 0.1152  | 0.0859  | -0.1448 | -0.2993 | -0.6221 | -0.6044 | -0.8691 |

|               |         |         |         |         |         |         |         |         |         |         |         |         |
|---------------|---------|---------|---------|---------|---------|---------|---------|---------|---------|---------|---------|---------|
| PBANKA_111260 | 0.4471  | -0.0152 | 0.3347  | 0.7311  | 0.366   | 0.4557  | 0.0833  | -0.5259 | -0.6082 | -0.7913 | -1.1735 | -1.117  |
| PBANKA_144780 | 0.6734  | -0.6305 | 0.4559  | 0.4598  | 0.4027  | -0.3327 | 0.435   | 0.1243  | 0.028   | -0.669  | -0.9315 | -0.956  |
| PBANKA_031160 | 0.343   | 0.7815  | 0.3294  | 0.401   | 0.1139  | 0.4241  | 0.0957  | -0.0097 | 0.2857  | 0.3448  | 0.4704  | 0.473   |
| PBANKA_080070 | 0.2947  | 0.2782  | 0.1722  | 0.1486  | 0.1182  | 0.3619  | 0.022   | 0.0139  | -0.0514 | -0.1828 | -0.4705 | -0.2778 |
| PBANKA_102730 | -0.2629 | 0.3382  | -0.0052 | 0.1564  | -0.1619 | 0.5376  | 0.0947  | 0.1153  | 0.3472  | 0.0683  | 0.1051  | 0.2253  |
| PBANKA_132390 | 0.061   | -0.0777 | -0.1096 | 0.0066  | -0.038  | 0.3866  | 0.0211  | -0.3503 | -0.9753 | -0.8557 | -0.5531 | -0.5295 |
| PBANKA_135020 | 0.2163  | 0.386   | -0.1198 | -0.0894 | -0.0719 | -0.3813 | -0.9379 | -0.4373 | 0.6526  | 1.0312  | -0.0943 | 0.3399  |
| PBANKA_090380 | -1.4291 | -0.9777 | -1.4042 | -1.4897 | -0.9593 | -0.6661 | -0.5966 | 0.2208  | 0.2596  | 0.7929  | 0.6857  | 0.5872  |
| PBANKA_020160 | -0.8971 | 0.4523  | 0       | -0.1207 | -0.2877 | -0.1032 | 0.3067  | 0.032   | 0.1845  | -0.5138 | 0.2699  | 0.7647  |
| PBANKA_061580 | 0.1475  | -0.595  | -0.0494 | -0.1671 | 0.2794  | 0.2763  | 0.0348  | 0.0883  | 0.1667  | 0.2906  | -0.1997 | -0.3214 |
| PBANKA_142530 | -0.1091 | 0.4392  | 0.1472  | 0.035   | -0.0021 | 0.1224  | -0.0979 | -0.3326 | -0.4771 | -0.721  | -0.6293 | -0.653  |
| PBANKA_080480 | 0.1369  | -0.2703 | -0.1591 | 0.1914  | 0.1409  | 0.1127  | -0.1896 | -0.6319 | -0.2916 | -0.6836 | -0.4076 | -0.6704 |
| PBANKA_051280 | -1.4846 | -0.4679 | -1.2352 | -0.8989 | -0.8752 | -0.8337 | 0.0678  | 0.3282  | 0.7454  | 1.2075  | 0.8439  | 0.6853  |
| PBANKA_040130 | -0.1758 | 0.1502  | 0.2509  | 0.3832  | 0.3249  | 0.2835  | 0.0296  | -0.2172 | -0.2956 | -0.703  | -0.3467 | -0.9304 |
| PBANKA_120900 | 0.7169  | 0.775   | 0.5142  | 0.368   | 0.2707  | -0.0609 | -0.3684 | -1.0646 | -0.7    | -0.5173 | -0.3572 | -0.4245 |
| PBANKA_061650 | 0.0521  | 0.0909  | 0.2574  | 0.6772  | 0.3197  | 0.4633  | 0.2006  | -0.3997 | -0.6511 | -0.592  | -0.9272 | -0.9016 |
| PBANKA_143010 | 0.1967  | 0.1354  | 0.3306  | 0.4193  | 0.3186  | 0.4531  | 0.1696  | -0.0601 | -0.1002 | -0.139  | -0.4625 | -0.7392 |
| PBANKA_041570 | -0.221  | -0.0283 | -0.2915 | -0.2171 | 0.1159  | 0.1993  | 0.1596  | 0.3744  | 0.3993  | 0.1065  | 0.0433  | -0.0965 |
| PBANKA_093920 | 0.0056  | 0.1122  | -0.0476 | 0.531   | -0.2191 | -0.1399 | -0.6817 | -0.4608 | 0.3581  | 0.6704  | 1.0389  | 1.3786  |
| PBANKA_091790 | -0.1453 | 0.8096  | 0.4126  | 0.1818  | -0.3186 | 0.337   | 0.1895  | -0.4507 | -0.4472 | -0.3213 | -0.3762 | -0.3534 |
| PBANKA_080420 | 0.0651  | 0.7254  | 0.6096  | -0.1084 | -0.0862 | 0.1973  | -0.2778 | -0.9093 | -1.059  | -1.4509 | -0.2207 | -0.3788 |
| PBANKA_020780 | 0.4426  | -0.0285 | 0.483   | 0.3669  | 0.336   | 0.1494  | 0.0498  | -0.1667 | -0.9177 | -1.2227 | -1.2301 | -1.38   |
| PBANKA_101720 | 0.0531  | -0.3993 | -0.1935 | 0.2686  | 0.3848  | 0.054   | 0.3663  | 0.1139  | 0.0818  | -0.0082 | -0.3583 | -0.4843 |
| PBANKA_083310 | 0.3829  | 0.7056  | 0.2368  | 0.1836  | 0.13    | 0.2761  | -0.2017 | -0.2375 | -0.3179 | -0.6649 | -0.3189 | -0.2243 |
| PBANKA_121870 | 0.6564  | 1.0402  | 0.107   | -0.0378 | -0.1472 | -0.4232 | -0.4955 | -0.4396 | 0.0745  | -0.0729 | 0.3661  | 0.9525  |
| PBANKA_122500 | -0.4014 | -0.7069 | -0.4567 | -0.2251 | -0.0039 | -0.057  | 0.5141  | 0.68    | 0.5065  | 0.5182  | 0.0544  | -0.3033 |
| PBANKA_030490 | -0.7712 | -0.1803 | -0.5533 | -0.5979 | 0.1219  | -0.1597 | 0.199   | 0.2031  | 0.3034  | 0.72    | 0.4647  | 0.6334  |
| PBANKA_103470 | -0.2716 | 0.2368  | 0.188   | 0.5184  | 0.0858  | 0.515   | 0.159   | 0.2648  | -0.0145 | -0.2391 | -0.4443 | -0.1582 |
| PBANKA_103490 | 0.4828  | 0.6093  | 0.1153  | 0.1545  | 0.0533  | -0.4073 | -0.306  | -0.3313 | -0.0844 | 0.2326  | 0.0002  | 0.1278  |
| PBANKA_020240 | -0.2293 | -0.2872 | -0.0246 | 0.2671  | 0.0629  | -0.0636 | 0.5795  | 0.5003  | 0.0883  | 0.2153  | 0.1723  | -0.0411 |
| PBANKA_135610 | -0.308  | -0.5353 | -0.3024 | -0.26   | -0.4629 | 0.207   | 0.2037  | 0.0882  | 0.3889  | 0.6513  | 0.9237  | 1.1818  |
| PBANKA_010160 | -0.0434 | -0.0551 | 0.0093  | 0.5882  | -0.1578 | -0.3122 | -0.5764 | -0.8369 | -0.6164 | -1.0393 | -0.605  | 0.1152  |
| PBANKA_113710 | 0.1076  | 0.2899  | 0.1538  | 0.0066  | -0.1061 | -0.0681 | -0.2885 | -0.5178 | -1.0597 | -0.9582 | -0.2043 | -0.0759 |
| PBANKA_134000 | 0.1861  | 0.3593  | 0.3469  | 0.5301  | 0.0535  | -0.2026 | -0.0268 | -0.8551 | -0.4679 | -1.1056 | -1.0401 | -1.1255 |
| PBANKA_131750 | -0.2171 | 0.5465  | -0.3152 | -0.6839 | 0.0788  | -0.1827 | -0.0566 | 0.0035  | -0.1265 | -0.1989 | -0.7589 | 0.0516  |
| PBANKA_123005 | 0.2762  | 0.2537  | 0.3693  | 0.3124  | 0.0852  | 0.2349  | 0.3329  | 0.1891  | 0.2656  | -0.004  | -0.0665 | -0.389  |
| PBANKA_103810 | 0.3072  | 0.4041  | 0.2767  | 0.9365  | 0.8096  | 0.8133  | -0.0106 | -0.4488 | -0.5926 | -1.0038 | -1.3894 | -0.8137 |
| PBANKA_132000 | -0.1502 | -0.4982 | -0.0063 | 0.1834  | -0.002  | 0.368   | 0.326   | 0.0295  | 0.4864  | 0.1657  | -0.7389 | -0.3769 |
| PBANKA_135840 | -0.1894 | -0.5087 | -0.3531 | 0.1036  | -0.2156 | 0.1718  | -0.1719 | -0.1817 | -0.599  | -0.6772 | -0.4301 | -0.7369 |
| PBANKA_143640 | 0.2871  | 0.2793  | 0.0702  | 0.3622  | -0.123  | 0.2808  | -0.0886 | -0.0849 | -0.091  | -0.4676 | -0.1658 | 0.568   |
| PBANKA_110830 | 0.5562  | -0.016  | -0.0241 | -0.2768 | -0.2698 | -0.303  | -0.0387 | 0.3736  | -0.2    | -0.1043 | -0.1326 | -0.7985 |
| PBANKA_041820 | -0.7135 | -0.2728 | -0.5168 | -0.2287 | 0.0984  | -0.2006 | 0.3756  | -0.0888 | -0.5127 | -0.4965 | -0.3745 | -1.2797 |
| PBANKA_121920 | -0.9545 | -0.8132 | -0.5189 | -0.0539 | -0.0478 | 0.4205  | 0.419   | 0.1617  | 0.2981  | 0.0149  | -0.5593 | -0.5016 |
| PBANKA_120530 | -0.6511 | -0.6023 | -0.4421 | 0.1194  | 0.0506  | 0.4543  | 0.3172  | 0.6181  | 0.4868  | 0.3254  | 0.5838  | 0.7179  |
| PBANKA_133620 | -0.4429 | 0.0097  | -0.0933 | -0.1802 | -0.6489 | 0.3552  | -0.1126 | -0.0076 | 0.5948  | 0.5266  | 1.1254  | 1.8469  |
| PBANKA_142770 | -0.6898 | -0.2746 | -0.4907 | -0.7507 | -0.6272 | -0.4647 | 0.2646  | 0.864   | 0.8652  | 1.0576  | 0.245   | 0.1399  |
| PBANKA_103260 | 0.3093  | -0.1484 | 0.3424  | -0.4662 | 0.1313  | 0.1828  | 0.0239  | 0.3121  | -0.3304 | 0.1286  | 0.2685  | 0.0186  |
| PBANKA_140340 | 0.5064  | -0.6543 | 0.0158  | 0.15    | 0.1757  | 0.3085  | -0.4482 | -0.4965 | -0.6455 | -0.9841 | -0.5554 | -0.4541 |
| PBANKA_093650 | -0.1207 | -0.064  | -0.2248 | 0.2449  | 0.211   | 0.5752  | 0.203   | 0.0671  | 0.0623  | -0.0128 | 0.2577  | -0.1379 |
| PBANKA_135450 | 0.2478  | 0.2423  | 0.2625  | 0.3726  | -0.0511 | -0.2734 | -0.1875 | -0.7213 | -0.8855 | -1.0796 | -0.5571 | 0.4584  |
| PBANKA_121810 | -0.2842 | -0.5965 | -0.4199 | -0.1745 | -0.4288 | -0.8734 | -0.7916 | -1.2847 | -1.0396 | -0.7546 | 0.1635  | -0.3208 |
| PBANKA_141760 | 0.0997  | 0.1105  | -0.1611 | 0.3448  | 0.2077  | 0.2712  | 0.3399  | 0.6705  | 0.4398  | 0.3868  | 0.3492  | 0.3796  |
| PBANKA_052120 | -0.5646 | -0.4901 | -0.5219 | -0.8538 | -0.3773 | -0.1937 | -0.4041 | 0.6452  | 1.5374  | 1.481   | 1.2793  | 1.5437  |
| PBANKA_140510 | 0.2362  | 0.8242  | 0.0438  | 0.8569  | 0.441   | 0.2446  | 0.2112  | -0.1719 | -0.1447 | -0.2926 | -0.5994 | -0.0636 |
| PBANKA_120860 | 0.5026  | 0.3824  | 0.0999  | -0.4103 | -0.0793 | 0.3967  | 0.0705  | -0.1177 | -0.3225 | -0.161  | 0.076   | 0.9998  |
| PBANKA_131630 | -0.1959 | 0.377   | -0.1047 | 0.0762  | -0.3659 | 0.0696  | -0.3196 | -0.2759 | -0.3507 | -0.1084 | -0.3083 | -0.4289 |
| PBANKA_080990 | 0.3987  | 0.0732  | 0.3381  | 0.2524  | 0.0404  | 0.63    | 0.1796  | -0.1289 | -0.0604 | -0.4464 | -0.5708 | -0.7344 |
| PBANKA_060920 | 0.2175  | -0.2633 | 0.1002  | 0.4039  | 0.0495  | 0.2142  | 0.2143  | 0.1038  | -0.0762 | -0.0386 | -0.3451 | -0.1807 |
| PBANKA_081890 | -0.3981 | 0.5748  | -0.2076 | -0.4003 | 0.3327  | -0.2948 | -0.0599 | -0.3057 | -0.7754 | -0.784  | -0.9159 | -0.9147 |
| PBANKA_103380 | -0.3318 | 0.0535  | 0.0597  | -0.2124 | 0.1376  | 0.2506  | -0.1674 | -0.0212 | -0.2158 | -0.2948 | -0.4365 | -0.4789 |
| PBANKA_102840 | 0.2661  | -0.0593 | 0.3877  | 0.518   | 0.3561  | 0.367   | -0.2523 | -0.5385 | -1.242  | -1.7596 | -1.4903 | -1.2487 |
| PBANKA_140680 | 0.1958  | 0.0936  | 0.4904  | 0.3781  | 0.4423  | 0.2482  | -0.7543 | -1.1621 | -1.1283 | -1.7247 | -0.4627 | -0.2188 |
| PBANKA_082310 | 0.0145  | 0.7956  | -0.0138 | -0.5971 | -0.6221 | -1.0098 | -1.1054 | -0.2956 | -0.1605 | 0.5526  | 1.4072  | 1.4557  |

|               |         |         |         |         |         |         |         |         |         |         |         |         |
|---------------|---------|---------|---------|---------|---------|---------|---------|---------|---------|---------|---------|---------|
| PBANKA_020270 | 0.115   | 0.2782  | 0.1732  | 0.3357  | 0.259   | 0.0594  | 0.0403  | 0.1917  | 0.1114  | 0.048   | 0.1737  | 0.1533  |
| PBANKA_091270 | 0.0396  | -0.3633 | 0.1566  | -0.293  | 0.144   | -0.2706 | -0.0228 | -0.3247 | -0.2343 | -0.6365 | -1.3898 | -0.8228 |
| PBANKA_081190 | -0.4332 | 0.1474  | -0.2987 | -1.0664 | -0.2198 | -0.0415 | -0.2151 | -0.6645 | -0.2361 | -0.4933 | -0.4577 | -0.1464 |
| PBANKA_020150 | 0.2503  | -0.3045 | 0.001   | 0.2479  | 0.301   | 0.3243  | -0.1171 | -0.1549 | 0.1637  | -0.0051 | 0.7755  | 1.0561  |
| PBANKA_114080 | 0.013   | 0.0416  | -0.0337 | 0.3409  | 0.04    | 0.4638  | 0.214   | -0.0841 | 0.2193  | -1.0081 | -0.4158 | -0.9609 |
| PBANKA_081160 | 0.1973  | 0.4082  | -0.0479 | -0.5734 | 0.2741  | -0.5245 | 0.3517  | -0.018  | -0.0844 | 0.107   | 0.1228  | -0.3485 |
| PBANKA_122330 | 0.4499  | 0.351   | 0.3917  | 0.1215  | 0.032   | -0.1252 | -0.1625 | -0.5917 | -0.7337 | -0.7298 | -0.2994 | 0.8593  |
| PBANKA_145330 | -0.1651 | 0.2807  | -0.3504 | -0.3121 | -0.5968 | -0.2336 | -0.0591 | 0.1387  | -0.1911 | -0.2733 | -0.4443 | -0.415  |
| PBANKA_030200 | -0.1142 | 0.5477  | -0.0914 | 0.2736  | -0.0499 | -0.2955 | 0.4816  | 0.4511  | 0.6499  | 0.6104  | -0.1235 | 0.6563  |
| PBANKA_140610 | -0.2833 | -0.232  | -0.0825 | -0.8019 | -0.3908 | -0.6457 | -0.8745 | -0.5318 | -0.3271 | -0.361  | -0.672  | -0.1158 |
| PBANKA_141530 | -0.2166 | -0.1697 | -0.3467 | 0.1176  | -0.0136 | 0.1155  | 0.0515  | 0.0473  | 0.1684  | 0.2569  | 0.041   | -0.0409 |
| PBANKA_144120 | -0.1437 | 0.5145  | 0.0997  | 0.3735  | 0.2241  | 0.5812  | 0.1871  | 0.2389  | 0.1717  | -0.036  | -0.2182 | 0.0284  |
| PBANKA_120340 | 0.3303  | 0.3841  | 0.1478  | 0.4162  | 0.1159  | 0.1397  | -0.1554 | -0.1035 | 0.2833  | 0.4672  | 0.7671  | 0.9602  |
| PBANKA_093730 | 0.1844  | -0.0004 | 0.1087  | 0.1038  | -0.1308 | -0.2096 | -0.1575 | -0.3832 | -0.0017 | 0.3496  | 0.3809  | 0.363   |
| PBANKA_114000 | -0.5098 | -0.0897 | -0.461  | -1.0598 | -0.491  | -0.2452 | -0.5491 | -0.6355 | -0.331  | -0.3805 | -0.5988 | -0.0373 |
| PBANKA_070970 | -0.3258 | 0.2894  | -0.0731 | -0.1147 | 0.1956  | -0.1359 | 0.1165  | 0.1626  | 0.1925  | 0.3075  | 0.604   | 0.3828  |
| PBANKA_134590 | -1.1697 | -1.5196 | -1.0524 | -1.0228 | -0.4542 | -0.3416 | 0.4219  | 0.7999  | 1.2441  | 1.375   | 0.3889  | 0.0078  |
| PBANKA_030140 | -0.2645 | -0.8087 | -0.2979 | -0.3189 | -0.0295 | -0.1718 | -0.0098 | -0.3447 | -0.192  | -0.0089 | -0.0633 | -0.2862 |
| PBANKA_135220 | 0.4364  | -0.1494 | 0.638   | 0.4657  | 0.3484  | -0.7981 | -0.1461 | -0.4613 | -0.4857 | -0.3732 | -0.5899 | -0.2005 |
| PBANKA_132890 | -0.2143 | 0.4682  | -0.1106 | -0.074  | 0.2008  | -0.2087 | 0.3316  | 0.175   | 0.3014  | 0.1683  | 0.0832  | 0.4663  |
| PBANKA_051440 | -0.2621 | 0.5985  | -0.3285 | 0.1398  | -0.0511 | 0.1202  | 0.2232  | 0.0452  | -0.0132 | -0.0374 | 0.4059  | -0.1481 |
| PBANKA_050810 | -0.2684 | 0.5654  | 0.2434  | 0.0679  | -0.1474 | -0.2953 | -0.5352 | -0.2618 | -0.0169 | 0.7537  | 1.5378  | 1.3783  |
| PBANKA_100180 | 0.0401  | 0.1678  | -0.1365 | -0.0527 | -0.1397 | -0.1505 | -0.0239 | 0.1477  | -0.1684 | 0.1014  | 0.0776  | -0.6418 |
| PBANKA_030520 | -0.0837 | -0.0453 | 0.1722  | 0.0204  | 0.0501  | -0.069  | 0.0883  | 0.3291  | 0.2094  | 0.0506  | 0.1609  | 0.0932  |
| PBANKA_071870 | 0.3558  | -0.887  | 0.3763  | 0.7277  | 0.7328  | 0.7718  | 0.3169  | 0.2373  | 0.4028  | -0.0613 | -0.2528 | -0.1351 |
| PBANKA_090260 | -0.0184 | -0.4138 | -0.0896 | 0.109   | 0.0007  | 0.0948  | 0.0298  | 0.143   | 0.5505  | 0.653   | 0.1154  | -0.033  |
| PBANKA_136530 | 0.1126  | -0.1801 | -0.0035 | 0.3798  | 0.0739  | -0.0662 | 0.0222  | -0.3384 | -0.4656 | -0.1947 | -0.1426 | -0.0191 |
| PBANKA_100260 | -1.7688 | -0.9777 | -0.3788 | -0.6194 | -0.4964 | -0.2168 | 0.333   | 0.7057  | 1.2663  | 1.4507  | 1.1904  | -0.2711 |
| PBANKA_132490 | -0.0885 | 0.0005  | -0.0477 | -0.0187 | -0.5349 | 0.2182  | -0.1929 | -0.2079 | -0.1117 | 0.0596  | 0.5131  | 0.8051  |
| PBANKA_134110 | -0.7339 | -0.1189 | -0.2663 | 0.0939  | 0.0595  | 0.6081  | 0.4218  | 0.3417  | 0.3931  | 0.2515  | -0.0558 | -0.1336 |
| PBANKA_135210 | -0.376  | 0.1797  | 0.022   | 0.1999  | 0.1454  | 0.532   | 0.3009  | 0.0442  | 0.0896  | -0.1249 | 0.7246  | 0.5733  |
| PBANKA_113390 | -0.4513 | 0.0925  | 0.2134  | -0.1569 | 0.0465  | 0.0745  | -0.5934 | -0.4429 | -1.3176 | -1.0375 | -0.9117 | -1.2243 |
| PBANKA_111490 | -0.7038 | 0.2563  | 0.0568  | -0.4951 | -0.1629 | 0.0054  | -0.1626 | -0.5093 | -0.5673 | -0.4459 | -1.024  | -0.1473 |
| PBANKA_141960 | 0.0488  | -0.0581 | 0.1261  | 0.2761  | 0.2609  | 0.1319  | 0.0499  | -0.0989 | -0.0234 | -0.0796 | 0.1049  | 0.3349  |
| PBANKA_010990 | -0.5474 | -0.8678 | -0.6383 | -0.2848 | -0.4055 | 0.3111  | 0.4598  | 0.9582  | 1.2096  | 1.1435  | 0.5963  | 0.182   |
| PBANKA_122640 | 0.3698  | -0.7101 | -0.2246 | -0.4764 | -0.3158 | -0.1812 | -0.5985 | -0.4704 | -0.6328 | -0.5301 | -0.5708 | -0.3119 |
| PBANKA_041790 | 0.7468  | 0.3998  | 0.3776  | 0.2972  | 0.384   | 0.0035  | -0.1773 | -0.1849 | -0.3629 | -0.4375 | -0.1417 | -0.4515 |
| PBANKA_061960 | 0.3315  | 0.6283  | 0.0341  | 0.2982  | 0.231   | 0.1592  | 0.0835  | 0.2783  | 0.3061  | 0.0731  | -0.1544 | 0.0338  |
| PBANKA_135190 | 0.7072  | 0.5887  | 0.509   | 0.5379  | 0.2982  | 0.1913  | -0.1133 | -0.6052 | -0.7509 | -1.1113 | -0.1164 | -0.2781 |
| PBANKA_091430 | -0.8686 | 0.3989  | -0.323  | -0.1689 | -0.2143 | -0.4197 | -0.1478 | 0.1292  | -0.5444 | -0.5765 | -0.4867 | -0.8039 |
| PBANKA_122020 | 0.5151  | 0.7848  | 0.2155  | -0.0806 | -0.5375 | -0.3078 | -0.6208 | -0.5962 | -0.4936 | -0.0138 | 0.8091  | 1.6417  |
| PBANKA_120330 | 0.3561  | 0.222   | 0.7154  | 0.4375  | 0.7332  | -0.0828 | 0.0086  | -0.1734 | -0.2291 | -0.7233 | -0.7323 | -0.1572 |
| PBANKA_094120 | -0.0801 | -0.1773 | 0.1     | -0.0426 | 0.2521  | 0.0178  | 0.0155  | -0.2496 | -0.298  | -0.2537 | -0.731  | -0.276  |
| PBANKA_040940 | 0.0273  | -0.7699 | 0.1582  | 0.2339  | -0.0096 | 0.0942  | 0.5309  | -0.0251 | -0.0142 | 0.0433  | 0.1187  | -0.4774 |
| PBANKA_061490 | -0.0281 | -0.2395 | -0.6049 | -0.3731 | -0.3397 | 0.2747  | 0.3667  | 0.7106  | 0.6765  | 0.5756  | 0.0198  | -0.2547 |
| PBANKA_080210 | 0.1534  | 0.7251  | -0.3666 | 0.1209  | -0.1006 | -0.023  | 0.2403  | -0.1563 | 0.0616  | -0.0635 | 0.0822  | -0.2279 |
| PBANKA_103220 | 0.5205  | -0.2227 | 0.3965  | -0.114  | 0.1559  | -0.6435 | -0.2917 | -0.5324 | -0.4015 | -0.3275 | -0.758  | -0.0754 |
| PBANKA_123630 | 0.3859  | 0.3346  | 0.3428  | 0.2717  | 0.2497  | 0.0019  | -0.3595 | -0.3465 | -0.5783 | -0.1614 | 0.3685  | -0.4326 |
| PBANKA_093670 | -0.214  | -0.0224 | 0.4231  | 0.0747  | 0.3279  | -0.0566 | -0.3679 | -0.0989 | -0.0479 | 0.4199  | 0.3736  | 0.6932  |
| PBANKA_010240 | -0.2759 | -1.7502 | -0.2851 | -0.1883 | -0.144  | -0.2788 | 0.1058  | 0.1473  | 0.2465  | 0.0041  | -0.3411 | -0.2669 |
| PBANKA_133400 | 0.0822  | 0.3576  | 0.1127  | 0.1069  | 0.1145  | 0.0615  | 0.1389  | 0.32    | -0.0004 | 0.0927  | -0.7236 | -0.7065 |
| PBANKA_101840 | -0.1387 | 0.8673  | 0.1906  | 0.4999  | 0.2321  | 0.7696  | -0.0645 | 0.2221  | -0.4324 | -0.6961 | -0.481  | -0.295  |
| PBANKA_092300 | 0.7013  | 0.251   | 0.5215  | 0.115   | 0.3121  | 0.4224  | -0.0231 | -0.2279 | -0.1318 | -0.3221 | -0.2107 | 0.0193  |
| PBANKA_041560 | 0.3654  | -0.3864 | 0.1045  | 0.2646  | 0.1258  | -0.0337 | -0.245  | 0.1312  | -0.165  | 0.3158  | 0.3693  | 0.7526  |
| PBANKA_031540 | 0.2107  | 0.1656  | -0.2167 | -0.1915 | -0.1176 | -0.5291 | -0.3781 | 0.0504  | 0.398   | 0.5993  | 1.0374  | 0.772   |
| PBANKA_021280 | -0.9078 | -0.5326 | -0.6738 | -0.2985 | -0.3051 | 0.1089  | 0.6076  | 0.9936  | 1.2727  | 1.2187  | 0.243   | 0.0893  |
| PBANKA_010210 | 0.1325  | 0.5464  | -0.2858 | -0.3979 | -0.011  | -0.5552 | -0.3392 | -0.3261 | -0.3739 | -0.4587 | -0.5475 | -0.1054 |
| PBANKA_112160 | 0.0478  | 0.2314  | 0.2558  | -0.4477 | 0.0362  | 0.4217  | -0.1293 | 0.3417  | -0.1325 | -0.2619 | -0.2868 | 0.0428  |
| PBANKA_111820 | 0.0544  | 0.4057  | 0.075   | 0.2013  | 0.0409  | 0.6082  | 0.0807  | -0.325  | -0.0033 | 0.0481  | -0.1698 | -0.3582 |
| PBANKA_093180 | -0.476  | 0.1534  | -0.1564 | -0.169  | 0.0124  | 0.4805  | 0.1274  | -0.4008 | -0.4244 | -0.484  | -0.7277 | -0.9505 |
| PBANKA_112010 | -0.3836 | -0.2998 | 0.1137  | 0.2498  | 0.1536  | 0.5959  | 0.3141  | 0.4652  | 0.4405  | 0.4283  | 0.3862  | -0.132  |
| PBANKA_143830 | 0.0823  | -0.37   | 0.0647  | 0.1135  | 0.1957  | 0.191   | 0.0946  | 0.2534  | -0.1033 | -0.4324 | -0.6866 | -1.2092 |
| PBANKA_114260 | 0.1541  | 0.5979  | 0.2034  | -0.0725 | 0.113   | 0.4989  | 0.1121  | -0.2411 | -0.3147 | -0.1051 | -0.3804 | -0.2517 |



|               |         |         |         |         |         |         |         |         |         |         |         |         |
|---------------|---------|---------|---------|---------|---------|---------|---------|---------|---------|---------|---------|---------|
| PBANKA_040380 | 0.2442  | 1.3838  | 0.432   | -0.0312 | -0.0945 | 0.7372  | -0.4707 | -0.2912 | -0.4887 | -0.3315 | 0.5927  | 1.0191  |
| PBANKA_131150 | -0.2145 | -0.2569 | 0.1707  | 0.0024  | 0.1208  | 0.8544  | 0.4633  | -0.0495 | -0.1506 | -0.3248 | -0.6084 | -0.9436 |
| PBANKA_123560 | -0.3634 | 0.3018  | 0.3286  | -0.0943 | 0.4564  | 0.0811  | -0.7558 | -1.1653 | -2.2081 | -2.7148 | -1.9272 | -2.438  |
| PBANKA_050140 | -2.207  | -1.4751 | -2.0934 | -2.4665 | -1.1499 | -0.1764 | 0.5096  | 0.9348  | 1.1922  | 1.4505  | -0.2311 | -0.3448 |
| PBANKA_080600 | 0.3926  | 0.2888  | 0.2299  | -0.0121 | -0.0951 | -0.2818 | -0.2634 | -0.8072 | -0.3402 | -0.4302 | 0.4502  | 0.9071  |
| PBANKA_050990 | -0.0861 | -0.0689 | 0.1662  | 0.2614  | 0.2455  | 0.1057  | -0.0577 | -0.0914 | -0.5246 | -0.7235 | -0.9364 | -1.1122 |
| PBANKA_050560 | 0.3264  | 0.5495  | 0.4158  | 0.3601  | 0.3572  | 0.6446  | 0.0206  | 0.0091  | 0.0089  | -0.1151 | -0.2119 | -0.0069 |
| PBANKA_131310 | -0.0641 | -0.7154 | -0.1308 | 0.0761  | 0.1182  | 0.1774  | 0.2086  | 0.3175  | 0.503   | 0.3375  | 0.2051  | -0.1522 |
| PBANKA_145650 | 0.5534  | -0.5861 | 0.4423  | 0.0794  | 0.0235  | -0.3358 | -0.0037 | -0.0959 | 0.6635  | 0.3179  | 0.0661  | -0.0642 |
| PBANKA_141920 | -0.2967 | 0.426   | 0.3744  | -0.0736 | 0.6219  | -0.2304 | -0.4417 | -0.7876 | -1.0613 | -1.2703 | -0.6833 | -1.0039 |
| PBANKA_145980 | 0.3359  | -0.1911 | 0.1999  | 0.655   | 0.4244  | 0.3602  | -0.0732 | -0.1126 | -0.4986 | -0.4811 | -0.2655 | -0.4374 |
| PBANKA_093340 | 0.0953  | -0.1863 | 0.0028  | -0.3062 | 0.0448  | -0.2848 | -0.1742 | -0.6665 | -1.0726 | -1.4703 | -1.4342 | -1.2557 |
| PBANKA_040490 | -0.1788 | -0.1165 | 0.3113  | 0.469   | 0.2751  | 0.658   | 0.1584  | -0.0574 | 0.1188  | -0.4032 | -0.4229 | -1.0526 |
| PBANKA_090800 | 0.1856  | -0.1986 | 0.0921  | -0.0036 | 0.3309  | 0.3008  | -0.1199 | 0.2622  | 0.1439  | -0.4381 | -0.8019 | -0.8191 |
| PBANKA_101680 | 0.2868  | 0.2431  | 0.2977  | 0.2536  | 0.3165  | 0.2076  | -0.1491 | -0.4709 | -0.8465 | -1.1318 | -1.0533 | -0.6327 |
| PBANKA_072070 | -0.8855 | -0.5741 | -0.7063 | -0.2021 | -0.6136 | -0.4826 | 0.18    | 0.9102  | 0.53    | 1.7277  | 0.4583  | 0.2748  |
| PBANKA_145180 | 0.3402  | 0.4435  | -0.03   | 0.0693  | -0.019  | -0.2689 | -0.0931 | -0.0032 | -0.143  | 0.9519  | 0.6179  | 0.8106  |
| PBANKA_122780 | 0.2816  | -0.2701 | 0.0859  | 0.2505  | 0.1381  | 0.1555  | -0.0438 | 0.2624  | 0.5401  | -0.1038 | 0.3864  | 0.1812  |
| PBANKA_040610 | 0.2629  | 0.109   | -0.1015 | 0.2199  | 0.2112  | 0.27    | 0.2413  | -0.0722 | -0.32   | -0.0373 | -1.5709 | -0.6273 |
| PBANKA_143950 | 0.0908  | 0.3441  | 0.1097  | 0.4618  | 0.3642  | 0.884   | 0.4474  | 0.1945  | 0.0861  | -0.2501 | -0.5343 | -0.5772 |
| PBANKA_112460 | -0.8221 | -0.4793 | -0.2113 | -0.1393 | 0.0323  | 0.0455  | 0.3482  | 0.1693  | -0.2618 | -0.3009 | -0.5772 | -0.8372 |
| PBANKA_051970 | 0.2812  | -0.109  | 0.2167  | 0.0057  | 0.3293  | 0.5098  | 0.0153  | -0.5381 | -0.7551 | -0.8865 | -0.9791 | -0.9264 |
| PBANKA_101070 | 0.4572  | 0.1316  | -0.0938 | 0.3158  | 0.4104  | 0.4581  | -0.2697 | -0.1675 | -0.3292 | -0.4297 | -0.177  | 0.0795  |
| PBANKA_061510 | 0.1713  | 0.4826  | 0.1607  | 0.0842  | -0.1912 | -1.1944 | -0.2589 | -0.1093 | -0.0402 | 0.2284  | 0.7396  | 1.2209  |
| PBANKA_132300 | 0.4812  | 0.3333  | -0.0742 | -0.4613 | 0.0116  | 0.3632  | 0.2313  | 0.1144  | 0.0491  | 0.0932  | 0.3842  | 1.3213  |
| PBANKA_020650 | -1.3102 | -0.3536 | -0.8742 | -0.472  | -0.0844 | -0.3998 | -0.036  | -0.2045 | -0.1625 | -0.217  | -0.3514 | -0.5199 |
| PBANKA_132590 | -0.2521 | 0.2766  | 0.1256  | 0.1288  | 0.1311  | 0.0849  | 0.0444  | -0.2028 | -0.5456 | -0.768  | -0.53   | -0.5487 |
| PBANKA_112280 | -0.1843 | -0.4783 | 0.0285  | -0.4306 | 0.0332  | -0.1187 | 0.36    | -0.3496 | 0.0798  | -0.1193 | -0.1588 | -0.16   |
| PBANKA_121370 | 0.3234  | -0.0106 | 0.3851  | 0.5923  | -0.1141 | 0.3019  | 0.0916  | -0.0475 | -0.2885 | -0.4547 | -0.0178 | 0.0274  |
| PBANKA_112880 | -0.24   | -0.0356 | -0.3387 | 0.1274  | -0.1108 | 0.0888  | -0.1846 | -0.0546 | 0.4875  | 0.5179  | 0.8795  | 1.12    |
| PBANKA_092090 | -0.4483 | -0.1583 | -0.4121 | 0.208   | 0.1346  | -0.0598 | 0.3714  | 0.2502  | 0.1325  | 0.0099  | -0.7368 | -0.6554 |
| PBANKA_123340 | 0.0969  | 0.4444  | 0.0986  | 0.0144  | 0.1842  | 0.134   | -0.0673 | 0.0886  | 0.2625  | 0.1273  | 0.195   | 0.2388  |
| PBANKA_092000 | 0.0844  | 0.06    | 0.3603  | 0.5027  | 0.3161  | 0.2106  | 0.0175  | -0.2824 | -0.6948 | -1.1406 | -1.1767 | -1.0102 |
| PBANKA_051180 | -1.341  | -1.2037 | -0.9431 | -0.4676 | -0.2432 | -0.0531 | 0.2028  | 0.341   | 0.3413  | 0.1493  | 0.4966  | 0.7845  |
| PBANKA_061100 | 0.0255  | 0.0054  | 0.37    | 0.231   | 0.1501  | -0.4716 | -0.1464 | -0.5315 | -0.4452 | -0.4709 | -0.1998 | -0.4854 |
| PBANKA_070430 | -0.0277 | 0.4861  | -0.0827 | 0.4596  | -0.4996 | 0.5567  | -0.0824 | 0.1252  | 0.4808  | 0.2751  | -0.6336 | -0.6621 |
| PBANKA_140100 | 0.0749  | -0.2348 | -0.0618 | 0.3188  | 0.0678  | 0.2863  | -0.1774 | 0.0781  | -0.2191 | -0.1095 | 0.0329  | -0.3764 |
| PBANKA_093000 | -0.3451 | -0.3328 | 0.1166  | 0.4289  | 0.247   | 0.6434  | 0.1521  | -0.1879 | -0.4689 | -0.9032 | -1.4778 | -0.8293 |
| PBANKA_083140 | -0.1551 | -0.0299 | 0.4393  | 0.3685  | 0.0997  | 0.7544  | 0.2057  | 0.1252  | -0.2779 | -0.7396 | -1.3118 | 0.1109  |
| PBANKA_103550 | -0.9456 | -0.7315 | -0.3428 | 0.3656  | 0.4909  | 0.5998  | -0.0254 | -0.2588 | -0.4932 | -0.9601 | -0.6276 | -1.2695 |
| PBANKA_111530 | -1.9373 | -1.5189 | -2.2148 | -2.2027 | -1.1914 | -0.028  | 0.2772  | 0.6382  | 0.7833  | 1.0235  | 0.3352  | 0.24    |
| PBANKA_135160 | -0.2862 | 0.128   | 0.293   | 0.0976  | 0.1607  | 0.2536  | -0.3286 | -0.3741 | -0.2871 | -0.8556 | -0.5719 | -0.6356 |
| PBANKA_091150 | -0.2918 | -0.2447 | -0.4174 | -0.1579 | -0.1559 | 0.5805  | 0.2463  | 0.3734  | 0.6394  | 0.5415  | 0.1765  | 0.5779  |
| PBANKA_133760 | -0.3388 | -0.1289 | -0.1976 | -0.1789 | -0.0763 | 0.525   | -0.1569 | 0.1708  | 0.2734  | 0.2527  | 0.3719  | 0.2058  |
| PBANKA_030310 | 0.5336  | 0.1823  | 0.1794  | 0.0441  | 0.6023  | 0.0464  | 0.0267  | -0.4676 | -0.1916 | -0.6586 | 0.5712  | -0.2852 |
| PBANKA_103340 | 0.1191  | -0.0346 | 0.1483  | 0.0231  | 0.0262  | 0.0439  | 0.167   | 0.2774  | -0.3726 | -0.1491 | -0.4723 | -0.1282 |
| PBANKA_082390 | 0.249   | 0.5647  | 0.1586  | 0.1465  | 0.3115  | -0.3945 | -0.2209 | -0.5497 | -0.677  | -0.6054 | -0.0889 | -0.2442 |
| PBANKA_092220 | -0.0075 | -0.345  | 0.0413  | 0.3876  | 0.3148  | 0.8269  | 0.3622  | -0.0525 | -0.2352 | -0.6434 | -0.8061 | -0.7329 |
| PBANKA_091880 | 0.9129  | -0.1631 | 0.3924  | 0.0489  | 0.2027  | 0.1947  | -0.2418 | -0.3146 | -0.0818 | -0.2236 | 0.3843  | 0.6877  |
| PBANKA_145310 | 0.4924  | 0.6068  | -0.1698 | 0.5618  | -0.0843 | -1.1949 | -0.0049 | 0.192   | 0.4406  | 0.369   | 0.18    | 0.1615  |
| PBANKA_113310 | -0.2826 | -0.3133 | -0.1038 | -0.3242 | -0.2919 | -0.608  | 0.0076  | 0.1185  | 0.9241  | 0.7009  | 0.5906  | 0.7193  |
| PBANKA_091210 | -0.3379 | -0.1192 | -0.1367 | 0.1228  | 0.453   | 0.3435  | 0.3596  | 0.1104  | 0.0858  | -0.373  | -0.7866 | -0.7509 |
| PBANKA_143130 | -0.3212 | 0.47    | -0.4641 | 0.4243  | -0.1203 | 0.1472  | -0.0052 | -0.4185 | 0.293   | 0.2947  | 0.6255  | 0.7211  |
| PBANKA_144370 | 0.2927  | -0.0471 | 0.1232  | 0.2731  | 0.1144  | 0.303   | 0.225   | -0.2042 | -0.1758 | -0.5616 | -0.3827 | -0.574  |
| PBANKA_102470 | 0.2409  | -0.254  | -0.0355 | 0.0809  | -0.0345 | 0.0609  | -0.0296 | -0.3372 | -0.2264 | -0.5933 | -0.6345 | -0.5051 |
| PBANKA_145580 | -0.0358 | -0.6548 | -0.2594 | -0.0544 | -0.1668 | -0.7935 | 0.0865  | 0.4915  | 0.4931  | 0.1831  | -0.5016 | -0.1478 |
| PBANKA_060470 | -0.1208 | -0.2615 | 0.0763  | 0.5349  | 0.4144  | 0.2594  | -0.0073 | -0.4068 | -0.6697 | -0.6324 | -0.3652 | -0.7914 |
| PBANKA_031520 | 0.2673  | 0.0114  | 0.27    | 0.8344  | -0.0536 | 0.7385  | 0.22    | -0.6318 | -0.7235 | -1.8702 | -1.7143 | -1.0348 |
| PBANKA_120910 | 0.3154  | 0.8188  | -0.0068 | 0.5444  | 0.0485  | 0.0284  | -0.0576 | 0.027   | -0.0915 | -0.4314 | -0.9381 | -0.302  |
| PBANKA_062100 | -0.3914 | 0.0353  | -0.1645 | 0.6928  | -0.0226 | 0.151   | 0.1691  | 0.0933  | 0.0665  | 0.2992  | 0.2576  | -0.0401 |
| PBANKA_093250 | -0.7756 | -0.4082 | -0.2834 | -0.3773 | -0.0809 | -0.2419 | 0.1554  | 0.2566  | 0.2608  | 0.666   | 0.5439  | 0.7218  |
| PBANKA_110770 | -0.7374 | -0.3824 | -0.8011 | -0.62   | -0.1488 | 0.1419  | 0.2888  | 0.552   | 0.609   | 0.7804  | 0.2618  | -0.1343 |
| PBANKA_140480 | 0.2771  | 0.2697  | -0.0302 | 0.3331  | 0.0763  | 0.0665  | -0.2928 | -0.4144 | -0.3813 | -0.4723 | -0.6966 | -0.3004 |

|               |         |         |         |         |         |         |         |         |         |         |         |         |
|---------------|---------|---------|---------|---------|---------|---------|---------|---------|---------|---------|---------|---------|
| PBANKA_145880 | -0.0068 | -0.4556 | -0.0382 | 0.4694  | 0.1945  | 0.191   | 0.2422  | 0.4634  | -0.0386 | 0.4113  | -0.0866 | 0.1558  |
| PBANKA_010410 | -0.5682 | -1.0571 | -0.7045 | 0.0477  | 0.0992  | -0.3526 | 0.0175  | -0.1305 | 0.0569  | -0.036  | -0.0045 | 0.2803  |
| PBANKA_122090 | -0.0367 | 0.3678  | -0.0227 | 0.5774  | 0.2139  | 0.4691  | -0.2062 | -0.2804 | -0.4341 | -0.1201 | -0.1231 | -0.1664 |
| PBANKA_141290 | -1.1321 | -0.0624 | -0.7161 | 0.0635  | 0.1054  | 0.4736  | 0.5495  | 0.1992  | 0.0968  | -0.3049 | -1.2645 | -0.8594 |
| PBANKA_113850 | -0.0946 | 0.4371  | -0.3608 | -0.332  | -0.2793 | -0.1621 | -0.1321 | -0.2828 | 0.147   | 0.2223  | 0.7061  | 1.0455  |
| PBANKA_133380 | 1.0833  | 0.5613  | 0.3681  | 0.5029  | -0.0491 | 0.2547  | 0.2346  | -0.2988 | -0.2689 | -0.8265 | -0.6437 | -0.4354 |
| PBANKA_122350 | 0.1416  | 0.0236  | -0.0609 | 0.0899  | 0.1099  | -0.0072 | 0.1484  | 0.0408  | 0.4598  | 0.3381  | -0.1498 | 0.3361  |
| PBANKA_123410 | -0.5756 | 0.5175  | -0.533  | -0.458  | -0.3825 | -0.4955 | 0.0175  | -0.5491 | -0.4408 | -0.2229 | -0.6126 | 0.4892  |
| PBANKA_131350 | -0.4963 | 0.0779  | -0.2537 | -0.2774 | -0.1097 | 0.3288  | 0.0414  | -0.0891 | 0.3821  | 0.488   | 0.5587  | 0.7818  |
| PBANKA_031170 | -1.5904 | -1.1354 | -1.1449 | -0.3412 | -0.3754 | 0.2733  | 0.256   | 0.6404  | 1.3482  | 1.235   | -0.1043 | -0.4598 |
| PBANKA_090810 | 0.1608  | 0.224   | 0.1817  | 0.2503  | 0.2855  | 0.4345  | 0.1386  | -0.1704 | -0.2577 | -0.1748 | 0.1803  | -0.8575 |
| PBANKA_060310 | -0.2658 | 0.5102  | 0.5443  | 0.2238  | 0.241   | 0.4401  | 0.0147  | -0.2445 | -0.4163 | -0.1737 | -0.1775 | -0.0385 |
| PBANKA_113680 | -0.4492 | -1.1221 | 0.1162  | -0.3378 | 0.1682  | -0.4183 | -0.0378 | -0.0168 | 0.4821  | 0.2918  | 0.3695  | 0.8921  |
| PBANKA_040790 | -0.4382 | 0.2882  | -0.3161 | 0.2741  | 0.1339  | 0.0059  | 0.1771  | 0.0869  | -1.9942 | 0.0402  | 0.0254  | -0.1178 |
| PBANKA_113650 | 0.0784  | 0.2848  | -0.1425 | -0.0053 | 0.2314  | 0.3118  | 0.0173  | -0.1877 | -0.1534 | -0.3561 | -0.2684 | -0.462  |
| PBANKA_040360 | -0.1505 | -0.0419 | -0.0248 | -0.1476 | 0.058   | 0.2242  | 0.1819  | 0.1464  | -0.0313 | 0.0216  | -0.3944 | -0.4634 |
| PBANKA_141210 | 0.7729  | -0.2878 | 0.3088  | 0.6944  | 0.963   | 0.5107  | -0.3406 | -0.7535 | -0.3466 | -0.5136 | -0.5106 | -0.4568 |
| PBANKA_083500 | -0.3392 | -0.5646 | 0.1031  | 0.4235  | 0.1423  | 0.6498  | 0.1147  | -0.0287 | -0.1663 | -0.6855 | -0.9054 | -0.9151 |
| PBANKA_110790 | -0.4932 | 0.0501  | -0.1184 | 0.0229  | -0.1696 | -0.1061 | -0.1091 | -0.2733 | -0.0776 | 0.0243  | 0.7092  | 1.4533  |
| PBANKA_093170 | -0.3119 | -0.6312 | 0.027   | 0.3131  | 0.468   | -0.1128 | 0.1476  | -0.8995 | -0.6568 | -0.7127 | -0.8939 | -1.2364 |
| PBANKA_101590 | -0.5271 | 0.0964  | -0.3948 | -0.3857 | 0.1985  | -0.0399 | -0.0882 | 0.217   | -0.3123 | -0.1547 | -0.3775 | -0.4915 |
| PBANKA_145790 | -0.2966 | -0.1888 | -0.1484 | 0.5039  | 0.4425  | 0.5528  | 0.5341  | 0.5202  | 0.4693  | 0.4143  | -0.5113 | -0.4083 |
| PBANKA_081380 | 0.2681  | 0.3467  | 0.0788  | 0.4808  | 0.0807  | 0.1724  | -0.038  | -0.4937 | -0.091  | -0.3065 | -0.3505 | -0.0006 |
| PBANKA_134040 | -0.8108 | -0.0491 | -0.7195 | -0.3794 | -0.7308 | -0.5247 | -0.0171 | 0.3264  | 1.04    | 1.3154  | 1.7783  | 1.5066  |
| PBANKA_061930 | 0.0588  | -0.3507 | 0.2657  | 0.0913  | 0.4392  | 0.1233  | 0.0925  | -0.6389 | -1.262  | -1.7899 | -1.1879 | -1.5019 |
| PBANKA_090970 | -0.0449 | 0.4103  | 0.1888  | 0.137   | -0.3499 | 0.4155  | -0.2875 | -0.1278 | -0.5798 | -0.4121 | -0.5811 | -0.3603 |
| PBANKA_135750 | -0.0762 | 0.6713  | 0.0491  | 0.3997  | 0.0369  | 0.3029  | 0.044   | -0.7048 | -0.7434 | -0.6155 | -0.2818 | -0.5141 |
| PBANKA_094080 | -0.5971 | -1.0426 | -0.1564 | -0.0328 | 0.169   | 0.2411  | 0.3633  | 0.3986  | 0.0762  | -0.388  | -0.8659 | -0.8771 |
| PBANKA_052430 | 0.2028  | 0.5702  | -0.2622 | -0.3532 | -0.4007 | -0.837  | 0.053   | 0.2261  | -0.0719 | 0.5983  | 0.6984  | 0.7643  |
| PBANKA_030570 | -0.1064 | -0.7681 | 0.0568  | 0.47    | 0.2205  | 0.8343  | 0.4642  | 0.5194  | 0.4144  | 0.0398  | -0.8769 | -1.1448 |
| PBANKA_081040 | 0.331   | 1.0003  | 0.0495  | 0.5768  | -0.0651 | -0.1199 | 0.1848  | 0.0579  | 0.1276  | -0.0393 | -0.1814 | 0.0894  |
| PBANKA_123640 | -0.3882 | -0.1912 | -0.046  | 0.593   | 0.176   | 0.206   | 0.1631  | 0.1506  | -0.0211 | -0.1281 | -0.6303 | -0.4231 |
| PBANKA_123750 | 0.1555  | -0.5163 | 0.5425  | 0.6886  | 0.5277  | 0.3337  | -0.062  | -0.9281 | -0.8173 | -1.5755 | -0.9361 | -0.5574 |
| PBANKA_061830 | 0.421   | 0.831   | 0.4453  | -0.3168 | -0.1663 | -0.0585 | -0.5194 | -0.8944 | -1.3514 | -1.0239 | -0.2806 | -0.4225 |
| PBANKA_142620 | 0.1811  | 0.7467  | -0.1283 | -0.3885 | -0.0654 | -0.3347 | -0.8168 | -0.5961 | -0.4251 | 0.2628  | 0.6345  | 0.936   |
| PBANKA_041830 | -0.205  | 0.6103  | 0.0062  | 0.005   | 0.0735  | 0.1807  | -0.1001 | -0.0004 | -0.0353 | -0.0492 | -0.3105 | -0.2412 |
| PBANKA_100910 | 0.1047  | 0.0256  | -0.0117 | -0.345  | -0.2102 | -0.6051 | -0.3082 | -0.6125 | -0.7238 | -0.6533 | -0.6103 | -0.5244 |
| PBANKA_010910 | 0.1687  | 0.2286  | 0.4083  | 0.2223  | 0.2368  | 0.1144  | 0.2639  | 0.0023  | -0.4949 | -0.8974 | -0.8451 | -1.3899 |
| PBANKA_143960 | -0.5896 | -0.2547 | -0.1571 | -0.1653 | 0.1912  | 0.6813  | 0.2814  | 0.3547  | 0.3519  | 0.3752  | 0.23    | -0.2683 |
| PBANKA_132880 | -0.2475 | -0.4604 | -0.2137 | -0.0472 | -0.1051 | 0.0485  | 0.2369  | 0.3924  | 0.463   | 0.4815  | -0.134  | -0.0427 |
| PBANKA_071540 | -1.104  | 0.148   | -0.5723 | -0.1081 | -0.237  | 0.2338  | 0.0521  | 0.0342  | -0.1569 | 0.0276  | -0.5831 | -0.716  |
| PBANKA_070550 | -0.1542 | 0.3527  | -0.3001 | 0.0171  | -0.1534 | 0.0601  | -0.0484 | 0.2424  | 0.5867  | 0.8309  | 0.961   | 1.3741  |
| PBANKA_060870 | 0.397   | 0.1585  | 0.2529  | 0.4206  | 0.3092  | 0.0534  | -0.4592 | -0.777  | -1.0429 | -1.2701 | -0.9844 | -0.695  |
| PBANKA_010830 | -0.7495 | -0.9679 | -0.365  | 0.1698  | -0.1927 | 0.4887  | 0.5257  | 0.6243  | 0.5954  | 0.6982  | 0.712   | 0.1257  |
| PBANKA_124330 | 0.5013  | 0.2188  | 0.3987  | 0.4148  | 0.1307  | 0.1433  | -0.0997 | -0.8702 | -0.677  | -0.9177 | -0.0411 | -0.7272 |
| PBANKA_134210 | 0.3376  | -0.0742 | 0.3946  | 0.3573  | 0.1811  | 0.9472  | 0.1608  | 0.3239  | 0.1498  | -0.2972 | -0.4455 | 0.0791  |
| PBANKA_146510 | 0.2661  | 0.53    | -0.0068 | 0.2341  | -0.0053 | -0.2856 | -0.3576 | -0.2393 | 0.2449  | 0.2317  | 0.4517  | 1.2603  |
| PBANKA_020640 | 0.0015  | 0.6993  | -0.1077 | 0.1104  | 0.2634  | 0.4825  | -0.0475 | -0.0701 | -0.418  | 0.2536  | 0.5638  | 0.1921  |
| PBANKA_050410 | -0.6682 | -0.6559 | -0.4483 | -0.1205 | -0.0182 | 0.2785  | 0.4771  | 0.7503  | 0.8683  | 1.0063  | 0.8594  | 0.642   |
| PBANKA_110100 | 0.1423  | 0.3225  | 0.3832  | 0.6819  | 0.1275  | 0.3274  | 0.0526  | -0.6049 | -0.6675 | -0.7847 | -0.4534 | -0.7131 |
| PBANKA_142730 | 0.4535  | 0.4222  | 0.1423  | 0.5792  | 0.1846  | 0.2399  | -0.1934 | -0.2603 | -0.5758 | -0.7351 | -0.7812 | -0.0038 |
| PBANKA_080400 | 0.4485  | 0.5556  | 0.2503  | 0.2963  | -0.2649 | 0.1219  | 0.0815  | -0.4095 | -0.727  | -0.382  | -1.1947 | -0.3537 |
| PBANKA_112330 | 0.0893  | 0.0471  | 0.1896  | 0.3126  | 0.3301  | 0.033   | 0.0567  | 0.0151  | -0.0779 | -0.065  | -0.1825 | -0.537  |
| PBANKA_010510 | -0.1535 | 0.2507  | -0.5629 | -0.1545 | 0.2381  | -0.5851 | -0.3397 | -0.2954 | 0.2468  | 0.4702  | 1.5798  | 1.7215  |
| PBANKA_081300 | 0.0449  | 0.0959  | 0.1899  | 0.3496  | 0.3938  | 0.364   | -0.0083 | -0.3355 | -0.355  | -0.7836 | -0.6642 | -0.3425 |
| PBANKA_040770 | 0.3299  | 0       | 0.5113  | -0.1197 | 0.4006  | -0.2618 | -0.7805 | -1.0694 | -0.876  | -1.718  | -0.3177 | -0.6667 |
| PBANKA_113510 | 0.1855  | 0.4438  | 0.3612  | 0.0735  | 0.1842  | -0.1873 | -0.2523 | -0.68   | -1.0652 | -1.0862 | -0.0827 | 0.3262  |
| PBANKA_102720 | 0.2175  | -0.6557 | 0.1771  | 0.8166  | 0.8263  | -0.1235 | 0.1893  | -0.0057 | 0.0821  | -0.0778 | -0.4328 | -0.3705 |
| PBANKA_143470 | 0.1574  | -0.7032 | -0.0158 | 0.8128  | 0.1487  | 0.3507  | -0.2393 | -0.0558 | -0.3166 | -0.1865 | 0.3506  | -1.4915 |
| PBANKA_131490 | -0.0449 | -0.0471 | -0.2316 | 0.1703  | -0.2942 | -0.9781 | -0.5043 | -0.0465 | 0.333   | 1.013   | 1.3478  | 1.4091  |
| PBANKA_132280 | 0.7502  | 0.4346  | 0.3666  | 0.9468  | 0.2003  | 0.4453  | -0.0075 | 0.0163  | 0.1929  | 0.2985  | 0.1592  | 0.0229  |
| PBANKA_124420 | -0.299  | -0.2906 | -0.1836 | -0.1154 | -0.0458 | 0.0844  | 0.1692  | 0.1304  | 0.2527  | 0.2071  | -0.034  | -0.1669 |
| PBANKA_041550 | 0.5043  | 0.6541  | 0.228   | 0.4116  | 0.2848  | -0.7465 | 0.2331  | -0.1734 | -0.2035 | -0.3299 | -0.5202 | -0.1892 |

|               |         |         |         |         |         |         |         |         |         |         |         |         |
|---------------|---------|---------|---------|---------|---------|---------|---------|---------|---------|---------|---------|---------|
| PBANKA_091500 | -1.5618 | -0.6277 | -0.9874 | -0.6787 | -0.8285 | 0.3236  | 0.1216  | 0.3314  | 0.9769  | 1.3685  | 1.8897  | 1.1394  |
| PBANKA_142750 | -0.567  | -0.6116 | 0.3238  | 0.4987  | 0.3409  | 0.8066  | 0.2662  | 0.0582  | -0.8846 | -1.5229 | -1.484  | -1.2826 |
| PBANKA_121330 | 0.0509  | -0.2184 | -0.1365 | -0.1286 | 0.3142  | -0.8073 | 0.2483  | 0.715   | 1.0868  | 0.5686  | -0.0584 | 0.1865  |
| PBANKA_132170 | 0.282   | 0.9716  | 0.0777  | -0.0321 | 0.0315  | -0.2701 | -0.5015 | -0.627  | -0.4449 | -0.5821 | -0.2126 | -0.5877 |
| PBANKA_093120 | -0.3576 | 0.0759  | -0.3659 | -0.4473 | -0.4096 | -0.3373 | -0.1163 | 0.1941  | 0.6498  | 0.7889  | 0.7736  | 0.3785  |
| PBANKA_062230 | -0.0848 | -0.5727 | 0.1648  | 1.089   | 0.2634  | 0.9439  | 0.0954  | -0.4234 | -0.4309 | -0.6267 | -0.6978 | -1.0298 |
| PBANKA_070410 | -0.4185 | 0.4908  | -0.5413 | -2.0783 | -0.4149 | -0.6338 | -0.8185 | -0.7793 | -0.4082 | -0.3077 | -0.9372 | -0.2374 |
| PBANKA_071970 | -0.169  | -0.7087 | -0.2532 | -0.2447 | -0.0127 | -0.9574 | -0.1559 | 0.1244  | 0.5903  | 0.543   | 0.6963  | 0.7585  |
| PBANKA_010230 | -0.3354 | 0.013   | -0.9994 | -0.5573 | 0.0073  | -1.1962 | -0.1476 | -1.1601 | -0.429  | -0.1876 | -0.3738 | -0.0101 |
| PBANKA_141460 | 0.1942  | 0.3175  | 0.4384  | -0.0011 | 0.1066  | 0.2644  | -0.2559 | 0.0505  | -0.4036 | -0.6269 | -0.6276 | -0.3936 |
| PBANKA_061480 | 0.102   | 0.2007  | -0.8012 | -0.0416 | -0.2618 | 0.0494  | 0.1741  | 0.2048  | 0.2879  | 0.0084  | -0.251  | -1.4261 |
| PBANKA_030540 | 0.4086  | 0.5503  | 0.2881  | 0.0901  | 0.1298  | 0.7436  | 0.18    | -0.1486 | 0.0379  | 0.02    | 0.0158  | 0.8515  |
| PBANKA_081390 | -0.0901 | -0.2909 | 0.183   | 0.4398  | 0.405   | 0.4884  | 0.3144  | -0.1085 | -0.2753 | -0.8548 | -0.943  | -0.9601 |
| PBANKA_123450 | -0.1215 | 0.1994  | -0.2506 | -0.2001 | -0.186  | 0.1253  | 0.1195  | 0.2993  | 0.3202  | 0.2431  | -0.2114 | 0.1991  |
| PBANKA_093880 | 0.0516  | -0.3017 | -0.4718 | -0.3024 | -0.3823 | -0.0495 | 0.1561  | 0.4587  | 0.9764  | 0.8953  | 0.6417  | 0.4875  |
| PBANKA_140640 | -0.6224 | -0.6735 | -0.7749 | -0.6499 | 0.1395  | -0.1469 | -0.2207 | 0.0057  | -0.0003 | 0.0638  | 0.0623  | -0.1921 |
| PBANKA_124570 | 0.8166  | 0.2467  | 0.295   | 0.3885  | 0.2121  | 0.1271  | 0.1     | -0.18   | -0.1897 | -0.6949 | -0.7202 | -0.4421 |
| PBANKA_123050 | 0.0332  | -0.1927 | -0.0843 | 0.3283  | 0.1194  | 0.0306  | -0.34   | -0.4804 | -0.2339 | -0.4315 | -0.0987 | 0.456   |
| PBANKA_145830 | -0.4866 | -1.1498 | -0.2484 | 0.1083  | 0.0871  | 0.5181  | 0.205   | 0.4288  | 0.4405  | 0.4237  | -0.0275 | -0.1802 |
| PBANKA_101060 | -0.2324 | -0.1385 | -0.1156 | 0.1533  | 0.3775  | 0.5779  | 0.5734  | 0.449   | -0.4684 | -0.3681 | -1.1968 | -1.3028 |
| PBANKA_010120 | -0.0531 | 0.0971  | -0.1457 | -0.8434 | -0.1228 | 0.1788  | 0.213   | -0.1443 | -0.5592 | -0.3957 | -0.8572 | -0.0553 |
| PBANKA_133680 | 0.0107  | -0.3095 | 0.0729  | 1.1491  | 0.3901  | 0.4386  | 0.3731  | -0.2724 | -0.2264 | -0.5966 | -0.1412 | -0.5869 |
| PBANKA_145450 | -0.1164 | 0.1557  | -0.2026 | -0.2719 | 0.0985  | 0.3432  | -0.2179 | -0.5677 | -0.7236 | -0.5472 | -0.3018 | -0.136  |
| PBANKA_130660 | 0.3597  | -0.3142 | -0.0679 | -0.5431 | 0.0271  | 0.5353  | 0.2815  | 0.5891  | 0.3568  | 0.3176  | 0.0526  | -0.3024 |
| PBANKA_121340 | -0.4088 | -0.0258 | 0.2304  | 0.6016  | 0.2176  | 0.4429  | 0.037   | -0.171  | -0.0387 | -0.0554 | -0.4474 | 0.0925  |
| PBANKA_112560 | 0.0036  | 0.6751  | 0.3934  | 0.038   | 0.6812  | -0.0841 | -0.7203 | -1.2478 | -1.3655 | -1.6408 | -0.8219 | -0.8274 |
| PBANKA_083440 | 0.0891  | -0.2908 | 0.0458  | 0.1218  | 0.3819  | -0.1176 | 0.2043  | 0.2495  | -0.1824 | -0.4996 | -0.7402 | -0.7479 |
| PBANKA_030210 | 0.476   | -0.0117 | 0.3155  | 0.5497  | 0.2602  | 0.4363  | 0.1097  | 0.0941  | 0.1387  | 0.3879  | 0.0116  | 0.3195  |
| PBANKA_080970 | -0.3382 | -0.7058 | 0.1669  | 0.8353  | 0.6037  | -0.4192 | 0.1894  | 0.066   | -0.0196 | -0.899  | -1.0067 | -1.1152 |
| PBANKA_061950 | 0.0878  | 0.3897  | 0.1544  | -0.1204 | 0.2008  | 0.8017  | 0.2692  | -0.0783 | -0.2997 | -0.0012 | -0.0229 | 0.0137  |
| PBANKA_113440 | 0.4669  | -0.145  | 0.0164  | -0.4299 | -0.2577 | -0.2885 | -0.3351 | -0.5558 | 0.2503  | 0.3901  | 0.8079  | 1.3448  |
| PBANKA_021100 | 0.4183  | 0.8967  | 0.1204  | 0.0353  | -0.0899 | -0.0556 | -0.2248 | -0.4553 | -0.7346 | -0.4419 | 0.1023  | -0.1158 |
| PBANKA_061720 | 0.2307  | 0.3762  | 0.3563  | 0.3004  | 0.156   | 0.0838  | -0.3853 | -0.7807 | -1.0856 | -1.7132 | -1.0735 | -0.3709 |
| PBANKA_103590 | -0.2384 | 0.2039  | -0.5468 | -0.8481 | -0.6489 | -0.2716 | -0.1507 | -0.0028 | 0.1647  | 0.6301  | 1.2627  | 1.5129  |
| PBANKA_100660 | -0.0455 | 0.0763  | 0.0566  | 0.0647  | 0.1205  | 0.8171  | 0.1376  | 0.3773  | -0.135  | 0.0378  | -0.0601 | -0.44   |
| PBANKA_144000 | -0.0865 | -0.2743 | 0.2155  | -0.2242 | 0.3574  | 0.2001  | 0.0955  | 0.0664  | 0.1565  | 0.0522  | -0.2697 | -0.2083 |
| PBANKA_123780 | 0.2322  | 0.5675  | 0.2745  | -0.5551 | -0.2228 | -0.2591 | -0.4192 | -0.554  | -1.0448 | -0.3738 | 0.1344  | -0.0921 |
| PBANKA_130160 | -0.3331 | 0.0401  | -0.5137 | -0.4671 | -0.1852 | -0.0333 | -0.0686 | -0.0087 | 0.2659  | 0.2745  | 0.6529  | 0.7559  |
| PBANKA_140600 | -1.0341 | -0.6457 | -1.0931 | -1.4477 | -0.9175 | -0.5464 | -0.0427 | 0.6395  | 0.8593  | 0.9187  | 0.8412  | 0.383   |
| PBANKA_133300 | -0.5012 | -0.1529 | -0.1006 | 0.1552  | 0.1127  | 0.0493  | -0.1912 | -0.3589 | -0.268  | -0.1826 | 0.195   | 0.1113  |
| PBANKA_093220 | -1.1247 | -1.1977 | -0.5201 | 0.1746  | 0.4578  | 0.4623  | 0.3461  | -0.0766 | -0.6359 | -1.3452 | -1.8533 | -2.0894 |
| PBANKA_061940 | -0.3739 | -0.0507 | -0.1555 | -0.1563 | 0.0432  | 0.1489  | 0.0046  | -0.1416 | 0.1683  | -0.0441 | -0.1591 | -0.2581 |
| PBANKA_070640 | -0.4019 | -0.3163 | -0.1866 | 0.1458  | 0.2503  | 0.0848  | 0.3004  | 0.5129  | 0.4334  | 0.3145  | -0.166  | -0.1767 |
| PBANKA_102260 | -0.4171 | 0.1972  | -0.134  | -0.2183 | 0.0759  | 0.2924  | 0.0329  | 0.1203  | 0.4243  | 0.6065  | 0.9749  | 0.759   |
| PBANKA_070280 | -0.7381 | -0.2469 | -0.3007 | 0.1897  | 0.4111  | -0.0806 | 0.6147  | 0.3503  | 0.0036  | -0.3357 | -0.917  | -0.6734 |
| PBANKA_083620 | -0.2807 | 0.5629  | -0.0095 | -0.6186 | -0.4051 | -0.5313 | -0.6791 | -0.1318 | 0.1614  | 0.7372  | 1.6381  | 2.0923  |
| PBANKA_114550 | -0.043  | 0.2603  | 0.031   | 0.2067  | 0.1742  | -0.8997 | -0.3292 | -0.2458 | -0.2407 | -0.1417 | 0.1951  | 0.6923  |
| PBANKA_051700 | -0.0068 | -0.2407 | -0.2152 | -0.1325 | 0.1049  | -0.1607 | -0.8249 | -0.3683 | 0.3826  | 0.4498  | 0.9577  | 0.9566  |
| PBANKA_010180 | 0.2349  | 0.1127  | 0.3466  | 0.0235  | 0.0918  | 0.5544  | -0.2435 | -0.5639 | 0.2575  | -0.0825 | 0.1201  | 1.076   |
| PBANKA_111940 | 0.6568  | 0.3294  | 0.4056  | 0.5055  | 0.0412  | 0.4165  | 0.0358  | -0.3981 | -0.7944 | -0.7437 | -0.6003 | -0.4265 |
| PBANKA_143110 | 0.3966  | 0.3816  | -0.0856 | 0.2648  | 0.0241  | 0.7401  | 0.4088  | 0.4073  | -0.267  | -0.0164 | -1.0381 | 0.4905  |
| PBANKA_070960 | 0.8083  | 0.7367  | 0.1728  | 0.341   | 0.0806  | -0.0952 | 0.0661  | 0.1894  | 0.3388  | 0.05    | -0.175  | -0.1742 |
| PBANKA_010820 | -0.1186 | 0.1807  | -0.0251 | -0.4851 | 0.0135  | -0.5755 | -0.1856 | 0.2435  | 0.0363  | 0.4434  | 0.5975  | 0.3291  |
| PBANKA_051470 | 0.4163  | 0.2082  | 0.3347  | 0.9622  | -0.0772 | 0.5948  | -0.0055 | -0.0274 | -0.0919 | -0.3442 | -0.5706 | -0.7593 |
| PBANKA_143290 | 0.1234  | 0.8835  | -0.1447 | -0.4793 | 0.2657  | -0.0436 | -0.1736 | -0.4324 | -0.7425 | -0.5862 | -0.3416 | -0.2777 |
| PBANKA_143560 | 0.4149  | 0.6266  | 0.2359  | 0.0405  | 0.0327  | 0.0449  | -0.062  | -0.201  | 0.198   | 0.3578  | 0.6486  | -0.1496 |
| PBANKA_080470 | 0.5056  | 0.5363  | 0.1033  | 0.1003  | 0.1866  | 0.3777  | -0.0554 | -0.2829 | -0.1719 | -0.2015 | 0.2327  | 0.1301  |
| PBANKA_061200 | -0.086  | -0.2509 | 0.2684  | 0.5203  | 0.2266  | 0.6067  | 0.2682  | -0.081  | -0.2019 | -0.517  | -0.5246 | -1.0647 |
| PBANKA_136060 | -0.3157 | -0.3546 | -0.2475 | 0.3149  | -0.3253 | 0.0671  | 0.2331  | 0.1641  | 0.6594  | 0.4421  | -0.1299 | 0.5511  |
| PBANKA_102340 | 0.3831  | 0.1344  | 0.3769  | 0.4569  | 0.1489  | 0.288   | 0.3325  | -0.0412 | -0.2105 | -0.375  | -0.7776 | -0.4582 |
| PBANKA_102010 | -0.338  | -0.495  | -0.3506 | -0.7708 | -0.1562 | -0.4495 | -0.0576 | -0.2712 | -0.2132 | 0.1516  | 0.2256  | -0.6583 |
| PBANKA_133080 | 0.0524  | -0.0713 | 0.0387  | 0.4703  | 0.1465  | 0.3801  | 0.1232  | -0.3641 | -0.3633 | -0.6539 | -1.0223 | -0.9731 |
| PBANKA_060950 | 0.1732  | -0.2827 | -0.0214 | -0.0624 | -0.3633 | -0.3929 | -0.0894 | 0.5473  | 0.1635  | 0.4069  | 1.1513  | 1.1332  |

|               |         |         |         |         |         |         |         |         |         |         |         |         |
|---------------|---------|---------|---------|---------|---------|---------|---------|---------|---------|---------|---------|---------|
| PBANKA_051430 | -0.1146 | 0.6817  | -0.2663 | -0.7397 | -0.2493 | -0.08   | -0.1387 | -0.3232 | 0.1517  | 0.3373  | 1.1759  | 1.3764  |
| PBANKA_110570 | 0.3021  | 0.181   | -0.017  | -0.2341 | -0.6216 | -0.2839 | -0.855  | -0.4771 | 0.0107  | -0.0032 | 0.6666  | 1.2884  |
| PBANKA_082300 | 0.1636  | 0.6104  | 0.3433  | 0.109   | 0.0335  | 0.1723  | 0.2374  | 0.0829  | -0.3348 | -0.0767 | 0.1638  | 1.805   |
| PBANKA_051560 | -0.2082 | 0.0945  | 0.0577  | 0.1044  | 0.27    | 0.1995  | 0.251   | 0.2207  | -0.2374 | -0.1775 | -0.5105 | -0.3517 |
| PBANKA_133180 | -0.5897 | -0.7609 | 0.081   | 0.0834  | -0.0218 | 0.6137  | 0.1606  | 0.0019  | -0.2592 | -0.4671 | -0.7479 | -0.8615 |
| PBANKA_101610 | -0.4185 | -0.1597 | -0.2646 | -0.1678 | -0.1324 | 0.1797  | 0.4818  | 0.2446  | 0.1592  | 0.065   | -0.5157 | -0.5608 |
| PBANKA_041060 | 0.6082  | 0.3926  | 0.3091  | 0.235   | 0.3188  | -0.0336 | -0.3598 | -0.9446 | -0.995  | -0.9825 | -0.7396 | -0.9014 |
| PBANKA_140590 | -0.2922 | -0.7119 | 0.2852  | 0.3145  | 0.2611  | 0.5042  | 0.3797  | 0.4659  | 0.3967  | 0.4455  | -0.1677 | -0.1985 |
| PBANKA_135010 | 0.1177  | 0.3284  | 0.2558  | 0.4827  | 0.0635  | 0.1901  | 0.0612  | 0.3739  | 0.0551  | -0.1005 | -1.1099 | -1.1298 |
| PBANKA_102860 | -0.0993 | 0.5085  | -0.0697 | -0.2365 | -0.5704 | -0.0367 | -0.1492 | -0.0855 | -0.0752 | -0.1722 | -0.5615 | 0.0657  |
| PBANKA_132960 | -0.2173 | 0.7245  | -0.3186 | -0.1899 | -0.2339 | -0.7053 | -0.5561 | -0.4053 | 0.435   | 0.6249  | 0.7409  | 0.9205  |
| PBANKA_080040 | 0.3477  | -0.2362 | 0.2015  | 0.4559  | 0.3627  | 0.3142  | -0.0759 | -0.0666 | -0.1036 | -1.0888 | -0.7654 | -0.2532 |
| PBANKA_135410 | -1.1417 | -1.0955 | -0.4792 | -0.0268 | -0.3429 | 0.0283  | 0.452   | 0.4032  | 0.51    | 0.6893  | 0.3847  | -0.3543 |
| PBANKA_050970 | -0.1112 | -0.8773 | 0.1027  | -0.177  | 0.0884  | -1.1128 | 0.3486  | 0.2309  | 0.5971  | 0.4475  | 0.1917  | 0.1487  |
| PBANKA_082010 | -0.9192 | -0.1156 | -0.6274 | -0.2642 | -0.2311 | 0.3988  | 0.1378  | 0.4124  | 1.0157  | 1.0279  | 0.5966  | 0.386   |
| PBANKA_110300 | 0.2623  | -0.0616 | 0.1717  | 0.2086  | 0.0696  | -0.0718 | 0.1068  | -0.2381 | 0.3265  | 0.32    | 0.2248  | 0.4087  |
| PBANKA_030980 | 0.0978  | -0.3003 | 0.4009  | 0.1005  | -0.0107 | 0.0999  | 0.2253  | -0.2964 | -0.5808 | -0.5787 | -0.8922 | -0.6153 |
| PBANKA_124610 | -0.3803 | -0.0726 | -0.513  | -0.2305 | -0.6394 | 0.1462  | -0.18   | 0.2536  | 1.1516  | 1.312   | 1.2365  | 1.7676  |
| PBANKA_092950 | -0.3978 | 0.0555  | -0.5302 | -0.5455 | -0.0508 | 0.4101  | 0.2819  | 0.4433  | -0.058  | -0.2073 | -0.6744 | -0.1705 |
| PBANKA_041740 | -0.7367 | -0.2967 | -0.2039 | -0.0597 | 0.0069  | -0.048  | 0.1111  | 0.3846  | -0.1281 | 0.004   | -0.361  | -0.8171 |
| PBANKA_030420 | -0.0256 | 0.0686  | -0.0405 | -0.0774 | -0.2473 | -0.429  | -0.8917 | -1.1865 | -0.6515 | -0.7577 | 0.095   | 0.5126  |
| PBANKA_132640 | 0.0351  | 0.1209  | 0.2788  | 0.5096  | 0.7403  | 0.37    | -0.0769 | -1.1099 | -1.6001 | -2.4875 | -1.9147 | -2.3591 |
| PBANKA_091140 | 0.1147  | -0.1196 | 0.1039  | 0.1752  | 0.003   | 0.283   | -0.3242 | -0.4819 | -0.3198 | -0.5142 | -0.2768 | 0.0276  |
| PBANKA_140410 | -0.4865 | -0.27   | -0.4233 | -0.5474 | 0.092   | -0.5616 | -0.24   | 0.1455  | -0.5514 | -1.0303 | -1.4079 | -0.8391 |
| PBANKA_140530 | 0.8047  | -0.0708 | 0.1058  | 0.3199  | 0.1836  | 0.0528  | 0.1372  | 0.065   | 0.0306  | 0.1295  | 0.029   | 0.1785  |
| PBANKA_071670 | 0.3344  | -0.3537 | 0.4074  | 0.0024  | 0.1551  | -0.1099 | -0.0677 | -0.0852 | 0.368   | -0.0271 | -0.4005 | 0.2029  |
| PBANKA_112180 | 0.279   | -0.0299 | 0.082   | 0.2044  | 0.0166  | 0.3402  | 0.0639  | 0.1486  | 0.2432  | 0.1383  | 0.4068  | 0.0432  |
| PBANKA_144320 | 0.5411  | -0.1674 | 0.3334  | 0.1029  | -0.1195 | 0.4831  | -0.1038 | -0.116  | -0.3824 | -0.4566 | -0.5601 | -0.9062 |
| PBANKA_091920 | -0.3283 | -0.2488 | -0.1752 | 0.3222  | 0.1094  | 0.1209  | 0.038   | -0.1508 | 0.1388  | -0.1553 | -0.1843 | 0.7678  |
| PBANKA_051170 | -0.0992 | 0.1734  | 0.0477  | 0.039   | 0.3495  | 0.691   | -0.1077 | 0.0496  | 0.111   | 0.0555  | 0.133   | 0.7408  |
| PBANKA_113910 | 0.7345  | 0.3216  | 0.2024  | -0.0402 | 0.1099  | 0.5632  | 0.1923  | -0.0008 | -0.2519 | -0.2312 | -0.4003 | -0.4204 |
| PBANKA_041390 | 0.2675  | 0.0987  | 0.1051  | 0.4617  | -0.0941 | 0.1332  | 0.0397  | -0.1944 | -0.4854 | -0.6742 | 0.2335  | -0.6126 |
| PBANKA_121640 | 0.0794  | 0.4016  | 0.1396  | -0.1079 | 0.1831  | -0.6201 | -0.4316 | -0.6299 | -1.1395 | -0.9321 | -0.3656 | -0.8919 |
| PBANKA_090960 | -0.0294 | 0.1895  | -0.0082 | -0.2618 | -0.0148 | 0.1825  | -0.7322 | -0.934  | -1.0842 | -0.9075 | -0.4679 | -0.0462 |
| PBANKA_114210 | 0.5084  | 0.4012  | 0.3005  | 0.1472  | 0.2184  | 0.1574  | 0.1791  | 0.1177  | 0.0213  | -0.2708 | 0.6766  | 0.3729  |
| PBANKA_131420 | -0.1253 | 0.5821  | 0.1252  | -0.1529 | 0.2383  | -0.5804 | -0.351  | -0.0164 | -0.9098 | -0.3482 | 0.0841  | -0.4725 |
| PBANKA_110640 | 0.351   | 0.5834  | 0.3681  | 0.253   | 0.3349  | -0.4656 | -0.3301 | 0.0052  | 0.2047  | 0.0074  | 0.2356  | 0.4928  |
| PBANKA_145570 | 0.2644  | 0.3199  | 0.2066  | 0.2605  | 0.0872  | 0.4223  | -0.0609 | -0.8287 | -1.0543 | -0.5383 | -0.6751 | -0.7971 |
| PBANKA_040310 | -0.5199 | -1.0338 | -0.089  | 0.4019  | 0.1415  | 0.4214  | 0.5217  | 0.1297  | 0.0592  | -0.3107 | -0.6962 | -0.3798 |
| PBANKA_081530 | 0.5352  | 0.8252  | 0.2449  | 0.1961  | 0.1879  | 0.0092  | -0.223  | -0.0661 | 0.248   | -0.26   | 0.0078  | 0.5206  |
| PBANKA_094020 | 0.3902  | -0.0309 | 0.5083  | 0.4025  | 0.3892  | 0.6679  | 0.2772  | 0.0376  | -0.0183 | -0.3926 | -0.78   | -0.4083 |
| PBANKA_011120 | 0.2475  | -0.121  | 0.1436  | 0.3709  | 0.0475  | -0.0954 | -0.5555 | -0.418  | 0.1307  | 0.3767  | 0.849   | 1.392   |
| PBANKA_135270 | 0.2142  | 0.5296  | 0.1057  | -0.5732 | -0.3093 | -0.6588 | -0.1535 | -0.2936 | -0.4448 | -0.029  | 0.3024  | 0.3877  |
| PBANKA_122700 | -0.455  | -0.4014 | -0.5626 | -0.3428 | 0.1654  | -0.1396 | 0.2372  | 0.7106  | 0.9252  | 0.9354  | 0.121   | -0.195  |
| PBANKA_091870 | -0.2135 | -0.2217 | 0.0467  | 0.0019  | 0.2177  | 0.8125  | 0.2382  | 0.0424  | 0.0012  | -0.5022 | -0.6746 | -0.2885 |
| PBANKA_080960 | -0.3607 | 0.0248  | -0.1778 | 0.0606  | 0.0187  | 0.382   | 0.2931  | 0.7186  | 0.8086  | 0.6877  | -0.1762 | 0.2485  |
| PBANKA_060740 | -0.304  | 1.2768  | -0.1545 | -0.2289 | 0.1492  | -0.5296 | 0.0684  | 0.2162  | 0.1489  | 0.2639  | -0.0782 | 0.3966  |
| PBANKA_103100 | 0.1685  | -0.2117 | -0.5415 | -0.6366 | -0.4285 | -0.0599 | -0.6751 | -0.6634 | -0.0598 | 0.0747  | 0.904   | 0.941   |
| PBANKA_110680 | 0.2663  | 0.191   | 0.006   | 0.5582  | 0.1822  | 0.3535  | 0.0926  | -0.0974 | 0.2219  | 0.5602  | 0.6301  | 0.5217  |
| PBANKA_060570 | 0.5383  | 0.4469  | 0.2844  | -0.0526 | -0.2313 | -0.2677 | -0.4174 | -0.2702 | -0.0948 | 0.2432  | 0.6194  | 0.5785  |
| PBANKA_090690 | 0.5897  | 0.3003  | 0.2619  | 0.075   | 0.0382  | 0.0075  | -0.127  | 0.0089  | 0.0547  | 0.0467  | -0.1972 | 0.0126  |
| PBANKA_112620 | -0.3262 | -0.2837 | 0.409   | 0.3883  | 0.54    | 0.3366  | 0.0291  | -0.6492 | -1.1539 | -1.8815 | -1.997  | -2.0895 |
| PBANKA_122720 | 0.5971  | 0.5028  | 0.0284  | -0.2119 | 0.1981  | 0.239   | 0.027   | 0.3083  | -0.1038 | 0.0362  | -0.5266 | 0.153   |
| PBANKA_145070 | 0.0385  | 0.854   | 0.2057  | -0.0798 | 0.1338  | -0.15   | -0.6511 | -0.537  | -0.6853 | -0.5477 | -0.3005 | 0.0673  |
| PBANKA_110400 | -0.082  | -0.1242 | 0.3405  | 0.0104  | 0.2866  | 0.6299  | -0.2168 | -0.3777 | -0.539  | -0.8062 | -0.8246 | -0.7312 |
| PBANKA_122160 | 0.1993  | 1.0508  | 0.1584  | -0.0135 | 0.3702  | 0.2013  | 0.0496  | 0.1597  | -0.1266 | 0.0318  | 0.1548  | 0.4938  |
| PBANKA_041280 | -0.1542 | -0.1408 | 0.3033  | 0.1939  | 0.2434  | -0.0877 | -0.1817 | -0.727  | -0.3623 | -0.9177 | -0.6373 | 0.5282  |
| PBANKA_091110 | -0.23   | -0.0451 | 0.0641  | 0.1759  | -0.2001 | -0.4055 | 0.3315  | 0.3259  | 0.5088  | 0.492   | 0.4576  | 0.6729  |
| PBANKA_010940 | -0.2637 | -0.4754 | 0.0557  | -0.0494 | 0.4693  | 0.1876  | 0.2971  | -0.1808 | -0.2644 | -0.3967 | -0.9771 | -0.5865 |
| PBANKA_060860 | 0.2116  | 0.684   | 0.3232  | -0.0005 | 0.1066  | -0.9595 | -0.1343 | 0.0308  | 0.3448  | 0.3543  | 0.6681  | 1.1261  |
| PBANKA_051500 | -0.8325 | -0.7666 | -0.9229 | -0.7647 | -0.5818 | -0.732  | -0.8458 | -0.1142 | 0.3247  | 0.6336  | 0.9062  | 1.873   |
| PBANKA_071600 | -0.3665 | 0.2607  | 0.0564  | 0.1833  | 0.1974  | 0.224   | 0.0798  | 0.0081  | 0.171   | 0.2261  | -0.296  | -0.4914 |
| PBANKA_062060 | -0.113  | 0.6478  | -0.2489 | 0.089   | -0.1986 | -0.3192 | -0.1388 | 0.0446  | 0.3224  | 0.6226  | -0.124  | 0.8587  |

|               |         |         |         |         |         |         |         |         |         |         |         |         |
|---------------|---------|---------|---------|---------|---------|---------|---------|---------|---------|---------|---------|---------|
| PBANKA_052160 | -0.1837 | 0.5148  | 0.1533  | -0.0124 | 0.2984  | 0.158   | 0.0641  | -0.2745 | -0.4125 | -0.6843 | -0.4377 | -0.1807 |
| PBANKA_050230 | 0.188   | 1.0742  | 0.0336  | -0.2451 | 0.0119  | -0.2632 | -0.2601 | -0.1196 | -0.5475 | -0.3282 | -0.6392 | -0.3297 |
| PBANKA_144020 | 0.0165  | -0.2257 | 0.0249  | -0.163  | -0.1371 | -0.1826 | 0.1604  | -0.03   | 0.4071  | 0.5043  | 0.9191  | 0.8699  |
| PBANKA_101980 | -0.0443 | 0.0202  | 0.2629  | 0.4115  | -0.0549 | 0.0951  | 0.2881  | 0.3242  | 0.3265  | 0.236   | 0.1844  | 0.395   |
| PBANKA_121610 | 0.6328  | 0.83    | 0.1671  | 0.9104  | 0.0924  | 0.3123  | -0.316  | 0.0074  | -0.052  | -0.2714 | -0.1543 | 0.3445  |
| PBANKA_131890 | -0.7413 | -0.2684 | -0.4389 | 0.0177  | 0.4764  | 0.3683  | 0.1724  | -0.0419 | -0.2524 | -0.4809 | -0.5084 | -0.378  |
| PBANKA_101800 | 0.5806  | -0.1721 | 0.2508  | 0.7757  | 0.0409  | 0.2656  | 0.0735  | 0.1181  | 0.0262  | -0.0577 | 0.1504  | 0.784   |
| PBANKA_051710 | 0.0814  | 0.4635  | 0.1639  | 0.086   | 0.2186  | -0.0297 | -0.3544 | -0.5027 | -0.5675 | -0.666  | -0.4434 | 0.2282  |
| PBANKA_134230 | -0.6988 | -0.3456 | -0.7495 | 0.1235  | -0.2368 | -0.5442 | -0.4387 | -0.0417 | 0.5076  | 0.4474  | 1.5696  | 1.7207  |
| PBANKA_130980 | -0.4652 | -0.3473 | -0.2348 | -0.5597 | -0.2126 | -0.2937 | 0.0578  | 0.2974  | 0.5244  | 0.4202  | 0.6557  | 0.4306  |
| PBANKA_131030 | 0.0393  | -0.572  | -0.4562 | 0.3269  | 0.2537  | 0.4048  | 0.2424  | 0.6313  | 0.5132  | 0.3399  | 0.2355  | 0.2685  |
| PBANKA_120790 | -1.1507 | -0.8088 | -1.0087 | -0.829  | -0.9981 | -0.3492 | -0.1774 | 0.4783  | 1.0303  | 1.448   | 1.5097  | 0.9765  |
| PBANKA_060480 | 0.6047  | 0.6792  | 0.1923  | 0.3265  | 0.0668  | -0.0946 | -0.4199 | -0.5831 | -0.7675 | -0.6184 | -0.2161 | 0.1898  |
| PBANKA_133430 | -0.0986 | -0.2628 | -0.026  | -0.0597 | -0.0816 | -0.2443 | -0.402  | -0.2728 | 0.3885  | 0.2025  | 0.0559  | 0.7785  |
| PBANKA_070620 | 0.1349  | 0.4403  | 0.128   | 0.5533  | 0.1663  | 0.0541  | -0.4833 | -0.8671 | -1.0256 | -1.4273 | -1.194  | -0.6088 |
| PBANKA_144070 | 0.4978  | 0.3757  | 0.5502  | -0.634  | 0.0702  | 0.2772  | 0.0578  | 0.1434  | -0.1902 | -0.0137 | -0.1578 | -0.2542 |
| PBANKA_070880 | 0.5461  | 1.062   | 0.8669  | 0.3891  | 0.2723  | -0.6537 | 0.2036  | -0.0947 | -0.2646 | -0.2003 | -0.7306 | -0.1408 |
| PBANKA_141480 | -0.4858 | -0.0624 | -0.6433 | -0.3126 | -0.3733 | -0.3508 | -0.5935 | -0.06   | 0.5808  | 0.5605  | 1.2272  | 1.5396  |
| PBANKA_101740 | -0.8144 | -0.0306 | -0.5038 | -0.1264 | -0.0496 | -0.1718 | 0.3367  | 0.7137  | 0.5917  | 0.8839  | 0.1687  | 0.3368  |
| PBANKA_112350 | -0.5494 | 0.1598  | -0.6356 | -0.7893 | -0.4678 | -0.7043 | -0.1372 | 0.0369  | -0.3027 | -0.153  | 0.0235  | 0.1105  |
| PBANKA_021210 | 0.5356  | 0.1907  | 0.2027  | 0.1814  | 0.2623  | -0.2552 | -0.1424 | -0.6675 | -0.7355 | -1.5151 | -0.8972 | -0.9865 |
| PBANKA_122620 | -0.2076 | 0.379   | -0.1508 | -0.2326 | 0.0177  | -0.0215 | -0.3932 | -0.4241 | -0.6357 | -0.435  | -1.1218 | -1.1913 |
| PBANKA_070150 | -0.2181 | 0.739   | 0.0475  | 0.3163  | 0.1519  | 0.3163  | -0.4329 | -0.7478 | -0.8489 | -0.7712 | -0.6977 | -0.5828 |
| PBANKA_135620 | -0.6791 | 0.5777  | -0.3422 | -0.0124 | -0.0746 | 0.1305  | 0.1551  | 0.2727  | 0.4153  | 0.5894  | 0.1832  | 0.4738  |
| PBANKA_061210 | -0.4615 | -1.3259 | -0.2677 | -0.2029 | 0.5941  | -0.3137 | -0.0967 | -0.0365 | -0.231  | -0.189  | 0.1837  | 0.1718  |
| PBANKA_040930 | 0.3587  | 0.4296  | 0.1765  | 0.2344  | 0.1572  | 0.3077  | -0.2003 | -0.3197 | -0.3105 | -0.5449 | -0.3228 | -0.7743 |
| PBANKA_135730 | -0.7261 | 0.0186  | -0.7316 | -0.4074 | -0.2267 | -0.3608 | -0.0553 | 0.2726  | 0.3964  | 0.8626  | 0.6032  | 0.5004  |
| PBANKA_070100 | 0.4669  | 0.8366  | 0.1507  | 0.0616  | 0.0122  | -1.0212 | -0.3361 | -0.1516 | 0.1368  | 0.7588  | 0.856   | 1.2971  |
| PBANKA_123540 | 0.4226  | 0.5722  | 0.3091  | 0.1602  | 0.1123  | 0.5199  | -0.1921 | 0.044   | -0.111  | -0.1569 | -0.2366 | -0.0235 |
| PBANKA_093960 | 0.3391  | 1.0063  | 0.1556  | -0.4014 | -0.1133 | -0.7339 | -0.5818 | -0.2849 | -0.1777 | 0.2927  | 1.0303  | 0.804   |
| PBANKA_000480 | 0.1022  | -0.3251 | 0.1574  | 0.3836  | 0.1121  | 0.6175  | 0.2165  | 0.6168  | 0.117   | 0.1759  | 0.3392  | -0.4257 |
| PBANKA_130510 | 0.0886  | -0.3694 | 0.2187  | 0.4047  | 0.0451  | 0.4887  | -0.1654 | -0.6736 | -0.6851 | -1.1457 | -0.7339 | -0.4102 |
| PBANKA_120580 | -0.4261 | 0.1121  | 0.0449  | 0.3237  | 0.0336  | 0.2515  | 0.5284  | 0.6353  | -0.0486 | -0.4018 | -1.181  | -1.1437 |
| PBANKA_146080 | 0.1838  | 0.3373  | 0.0121  | 0.0866  | -0.1103 | -0.0989 | -0.0147 | 0.2291  | 0.1707  | 0.1955  | 0.2025  | 0.2778  |
| PBANKA_144950 | -0.6999 | -0.6212 | -0.4882 | -0.0867 | 0.1424  | 0.0216  | 0.0431  | 0.1401  | 0.0133  | -0.1273 | -0.3699 | -1.0741 |
| PBANKA_141830 | 0.0098  | 0.4584  | -0.0355 | 0.1347  | -0.1348 | 0.1716  | -0.2413 | -0.2383 | 0.1938  | 0.0595  | 0.1238  | 0.5688  |
| PBANKA_021480 | 0.2979  | 0.7655  | -0.1772 | 0.0825  | -0.2967 | -0.2094 | -0.3256 | -0.1533 | -0.0044 | 0.203   | 0.8953  | 1.3689  |
| PBANKA_083220 | -0.2994 | -0.28   | 0.2666  | 0.3647  | 0.5918  | 0.6814  | 0.469   | 0.1712  | -0.1163 | -1.102  | -1.8222 | -2.0626 |
| PBANKA_031240 | 0.0704  | 0.2386  | 0.158   | -0.0096 | -0.0127 | -0.1077 | -0.0501 | 0.0411  | -0.4116 | -0.2624 | 0.2109  | 0.5442  |
| PBANKA_135710 | 0.3048  | 0.7284  | -0.3017 | -0.405  | -0.0858 | -0.3126 | 0.0724  | -0.0833 | 0.4051  | 0.3938  | -0.0603 | -0.1503 |
| PBANKA_061010 | 0.3968  | 0.4823  | 0.3131  | 0.2208  | 0.1691  | 0.2023  | 0.1614  | 0.5188  | 0.2625  | 0.1461  | 0.088   | 0.2236  |
| PBANKA_093800 | 0.1534  | 0.1055  | -0.0409 | -0.1187 | 0.0063  | 0.6526  | -0.0515 | 0.0339  | 0.419   | 0.492   | 1.5826  | 1.8215  |
| PBANKA_140650 | -0.3772 | -0.7399 | -0.722  | -0.3732 | -0.3361 | -0.2989 | -0.1231 | 0.3199  | 0.28    | 0.7982  | 0.1026  | 0.1459  |
| PBANKA_141690 | -0.4499 | -0.3975 | -0.4766 | -0.432  | -0.131  | 0.2546  | 0.0748  | 0.1418  | 0.3018  | 0.5571  | 0.2724  | -0.1231 |
| PBANKA_050530 | -0.4794 | -0.0243 | -0.4159 | -0.1541 | -0.4961 | 0.7116  | 0.0169  | -0.2105 | 0.0865  | -0.2956 | -0.4256 | 0.0062  |
| PBANKA_123070 | 0.1     | 0.5768  | 0.1341  | 0.3818  | 0.0472  | -0.2703 | -0.0104 | 0.1852  | -0.0846 | -0.007  | 0.018   | -0.3379 |
| PBANKA_142990 | -0.0346 | 0.1101  | 0.0924  | 0.2395  | 0.2229  | -0.2801 | 0.1999  | -0.2612 | -0.2437 | -0.5012 | 0.096   | -0.2148 |
| PBANKA_112690 | 0.3586  | 0.3364  | 0.3809  | 0.5299  | 0.2893  | 0.3462  | 0.166   | 0.0016  | -0.0295 | -0.0063 | -0.251  | 0.1739  |
| PBANKA_041600 | -1.2899 | -0.5814 | -0.5985 | -0.2571 | 0.1276  | -0.1513 | 0.6839  | 0.6276  | 0.1102  | 0.2104  | -0.4545 | -0.9103 |
| PBANKA_133330 | 0.0027  | -0.6149 | 0.0851  | 0.1253  | 0.2475  | 0.4006  | 0.1051  | -0.1217 | -0.1905 | -0.1079 | -0.6557 | -0.4994 |
| PBANKA_111390 | -0.3268 | 0.0218  | -0.0394 | 0.1093  | 0.0546  | -0.0325 | 0.4365  | 0.2086  | 0.1611  | -0.003  | -0.7086 | 0.0541  |
| PBANKA_120550 | -0.858  | -0.9921 | -0.6821 | -1.3362 | -0.4773 | -0.6413 | -0.2483 | -0.2327 | 0.4311  | 0.35    | 0.068   | -0.2087 |
| PBANKA_010850 | 0.317   | 0.4523  | 0.3672  | -0.0245 | -0.118  | 0.4344  | -0.1961 | -0.1644 | -0.2932 | -0.4991 | -0.4759 | -0.827  |
| PBANKA_101890 | -0.2161 | -0.0944 | 0.3474  | 0.7813  | 0.1404  | 0.3551  | 0.2665  | 0.1764  | 0.0701  | 0.2015  | -0.2465 | -0.581  |
| PBANKA_133410 | -0.5001 | -0.5903 | -0.0309 | 0.3853  | 0.6607  | 0.5774  | 0.3676  | -0.1468 | -0.4284 | -1.1071 | -1.3398 | -1.7291 |
| PBANKA_100680 | 0.0566  | 0.2088  | -0.161  | -0.3211 | -0.1267 | 0.0186  | -0.2584 | 0.1739  | 0.2855  | 0.2351  | 0.8776  | 1.5928  |
| PBANKA_052170 | 0.2409  | -0.5805 | -0.2583 | -0.4548 | -0.2059 | -0.5574 | -0.6864 | -0.1664 | 0.1073  | 0.7834  | 1.2962  | 0.516   |
| PBANKA_135600 | 0.2179  | 0.7409  | 0.0934  | -0.0655 | 0.0763  | -0.2626 | -0.1728 | -0.1525 | 0.0086  | 0.2071  | 0.8515  | 0.7523  |
| PBANKA_123860 | -0.0439 | -1.009  | 0.1462  | 0.2325  | 0.0722  | 0.3151  | -0.1534 | 0.1806  | -0.0778 | -0.2021 | 0.425   | 0.1854  |
| PBANKA_130350 | -0.7505 | -0.8287 | -0.278  | -0.1606 | 0.0673  | 0.3203  | 0.3895  | -0.0713 | -0.0189 | -0.3545 | -1.0466 | -0.9888 |
| PBANKA_133880 | 0.1267  | 0.1804  | 0.2641  | 0.3827  | 0.2648  | 0.1063  | -0.1512 | -0.631  | -0.2606 | -0.4071 | -0.6667 | -0.4939 |
| PBANKA_110950 | 0.1382  | -0.4851 | -0.1422 | 0.9505  | -0.0213 | 0.6246  | 0.0265  | -0.0582 | -0.3704 | -0.2332 | -0.1438 | -0.4814 |
| PBANKA_143850 | -0.0179 | -0.0934 | 0.1804  | 0.2483  | -0.0435 | -0.1054 | 0.2248  | 0.2022  | 0.0851  | -0.08   | -0.4164 | -0.5484 |

|               |         |         |         |         |         |         |         |         |         |         |         |         |
|---------------|---------|---------|---------|---------|---------|---------|---------|---------|---------|---------|---------|---------|
| PBANKA_010640 | 0.0289  | 0.4034  | -0.3468 | -0.2979 | 0.0808  | -0.0224 | 0.0796  | 0.097   | 0.1602  | -0.0973 | -0.382  | -0.374  |
| PBANKA_135090 | -0.1059 | -0.2178 | -0.118  | 0.1637  | -0.7166 | 0.0159  | 0.2726  | -0.1943 | -0.2295 | -0.5546 | -0.456  | -0.8867 |
| PBANKA_080560 | -0.1947 | -0.2681 | -0.0387 | -0.1493 | -0.1102 | -0.2534 | -0.163  | -0.4851 | -0.6916 | -0.9223 | -1.3252 | -0.985  |
| PBANKA_112480 | -0.1196 | 0.3883  | 0.1181  | -0.0511 | 0.1163  | 0.8761  | 0.0845  | -0.1913 | -0.2159 | -0.2162 | -0.5226 | -0.2899 |
| PBANKA_135650 | -0.616  | -0.8614 | -0.3359 | 0.2189  | 0.081   | 0.6674  | 0.8622  | 0.3166  | 0.2909  | -0.3117 | -1.4437 | -1.1214 |
| PBANKA_061170 | -0.4473 | -0.396  | -0.3281 | 0.4977  | -0.1179 | 0.6557  | 0.5065  | 0.3327  | 0.3666  | 0.2128  | -0.0174 | -0.2362 |
| PBANKA_135690 | -0.1969 | -0.5982 | -0.0307 | 0.8637  | 0.4114  | 0.7141  | -0.0434 | -0.2736 | -0.1717 | -0.0338 | -0.3717 | -0.2624 |
| PBANKA_141140 | -0.8048 | -0.0964 | -0.0032 | 0.3025  | 0.1574  | 0.232   | 0.1077  | 0.0661  | 0.0686  | -0.1268 | 0.4036  | -0.071  |
| PBANKA_143890 | 0.2902  | 0.51    | 0.3683  | 0.0194  | 0.1986  | 0.4121  | 0.2086  | -0.1042 | -0.0443 | -0.1238 | -0.1518 | 0.3088  |
| PBANKA_133190 | 0.475   | 0.3869  | 0.5151  | 0.2852  | 0.3617  | -0.1354 | -0.9366 | -0.9696 | -0.7486 | -0.7759 | 0.232   | 0.7217  |
| PBANKA_144890 | -0.2691 | 0.0094  | -0.3161 | -0.2458 | 0.1808  | 0.2842  | -0.223  | -0.0137 | -0.2929 | -0.5157 | 0.0049  | 0.0425  |
| PBANKA_142550 | -0.1592 | -0.161  | -0.5369 | -0.7832 | -0.3985 | -0.4924 | -0.6362 | -0.5989 | -0.656  | -0.9326 | -0.6229 | -1.0546 |
| PBANKA_071840 | -0.1412 | -0.578  | 0.3939  | 0.1798  | 0.352   | 0.2368  | 0.3623  | 0.2084  | 0.016   | -0.3011 | -0.6733 | -0.4829 |
| PBANKA_123430 | -0.4783 | 0.8002  | 0.1336  | 0.1932  | 0.053   | 0.3599  | -0.3338 | 0.008   | -0.3502 | 0.1068  | 0.3382  | -0.2861 |
| PBANKA_092750 | 0.068   | 0.3093  | 0.0525  | 0.2259  | -0.2123 | 0.2673  | 0.3338  | 0.5359  | 0.5644  | 0.3971  | 0.0764  | -0.0239 |
| PBANKA_113670 | 0.2488  | -0.5328 | -0.2603 | -0.3628 | 0.0217  | -0.4697 | -0.0946 | 0.0763  | 0.0922  | 0.1233  | 1.1879  | 0.3068  |
| PBANKA_132720 | -0.3344 | -0.0707 | 0.0842  | -0.3808 | 0.095   | 0.4179  | -0.1612 | -0.7392 | -0.7336 | -0.7182 | -0.3378 | -0.5941 |
| PBANKA_114410 | 0.1559  | 0.7795  | 0.0805  | 0.2327  | 0.2806  | -0.1876 | 0.0866  | -0.1063 | -0.1703 | -0.4285 | -0.1102 | -0.3329 |
| PBANKA_141130 | 0.6066  | 0.1259  | 0.3363  | 0.3016  | 0.3542  | -0.0952 | 0.0498  | -0.086  | -3.1565 | -0.0724 | -0.4092 | -0.6483 |
| PBANKA_122200 | 0.1344  | 0.4561  | 0.1074  | -0.0607 | 0.1077  | -1.1014 | 0.0605  | -0.2392 | 0.0473  | -0.1268 | 0.0089  | -0.6374 |
| PBANKA_090670 | -0.043  | 0.215   | -0.0083 | 0.3817  | 0.1479  | -0.042  | -0.1277 | 0.0518  | -0.0243 | 0.121   | -0.5427 | -1.7533 |
| PBANKA_143260 | -0.0663 | -0.6317 | 0.2057  | 0.47    | 0.5567  | 0.7938  | 0.0736  | -0.1308 | -0.1919 | -0.5601 | -0.7579 | -0.1794 |
| PBANKA_120690 | -1.306  | -0.426  | -0.7608 | -0.4193 | 0.2884  | -0.1623 | -0.3923 | -0.4311 | -0.3282 | -0.3378 | 0.1406  | 0.0475  |
| PBANKA_010310 | -0.4286 | -0.4632 | 0.091   | 0.0179  | -0.1833 | 0.6698  | 0.2492  | 0.155   | -0.2367 | -0.3076 | 0.2769  | -0.8258 |
| PBANKA_103210 | -3.0801 | -1.651  | -2.7778 | -1.8389 | -1.4117 | -0.0433 | 0.3918  | 0.8046  | 1.31    | 1.7299  | 0.6171  | 0.1545  |
| PBANKA_135430 | 0.446   | 1.2003  | 0.3803  | 0.442   | 0.0179  | 0.139   | -0.4732 | -0.5813 | -0.2348 | -0.257  | 0.8274  | 0.916   |
| PBANKA_110480 | 0.2499  | -0.187  | -0.0508 | 0.5431  | 0.1333  | -0.7569 | -0.1091 | -0.22   | -0.266  | -0.3997 | -0.434  | -0.1229 |
| PBANKA_143530 | 0.0128  | -0.1146 | -0.4101 | -0.4182 | -0.1442 | -0.2119 | -0.1527 | -0.003  | 0.0891  | 0.0677  | -0.4428 | -0.3423 |
| PBANKA_062140 | -0.3194 | 1.2997  | -0.2274 | -0.633  | -0.4524 | -0.148  | -0.8464 | -0.2708 | -0.4331 | 0.112   | 0.6681  | 1.0852  |
| PBANKA_030380 | -1.0797 | -0.9796 | -0.8418 | -0.1537 | -0.2034 | 0.5231  | 0.3209  | 0.4587  | 0.5481  | 0.2674  | -0.0318 | -0.2325 |
| PBANKA_111540 | 0.0243  | -0.4538 | 0.1957  | -0.229  | 0.0321  | 0.1321  | -0.3467 | -0.6556 | -0.8386 | -1.2301 | -1.2447 | -1.1834 |
| PBANKA_070340 | 0.0028  | 0.4072  | 0.0677  | -0.3702 | -0.0089 | 0.457   | -0.0807 | -0.1041 | -0.492  | -0.6309 | -0.7151 | 0.258   |
| PBANKA_133230 | -0.2507 | -0.7305 | -0.0919 | -0.1014 | 0.3549  | 0.6626  | 0.246   | -0.1344 | 0.0412  | -0.0741 | -0.6541 | -0.2093 |
| PBANKA_030160 | -0.0758 | -0.342  | 0.1804  | 0.0912  | 0.0614  | 0.3509  | 0.0169  | 0.1956  | 0.1461  | 0.2581  | 0.4345  | 1.0566  |
| PBANKA_145560 | 0.087   | 0.3711  | -0.1495 | -0.3133 | -0.1772 | -0.3044 | -0.2142 | -0.2575 | -0.4136 | -0.6323 | -0.7353 | -1.3004 |
| PBANKA_092910 | -0.0899 | -0.6458 | 0.0598  | 0.2089  | 0.4492  | 0.0185  | 0.3155  | 0.1217  | 0.3234  | 0.3596  | 0.0394  | 0.7564  |
| PBANKA_062000 | 0.252   | 0.4361  | 0.1128  | 0.4632  | 0.3257  | 0.1096  | 0.0604  | 0.0701  | 0.0676  | 0.1293  | 0.5948  | 0.8105  |
| PBANKA_103830 | -0.2517 | -0.001  | -0.2208 | -0.1091 | -0.0485 | -0.272  | -0.0428 | -0.4016 | -0.6153 | -0.6992 | -0.8153 | -0.1122 |
| PBANKA_041110 | 0.1355  | 0.0499  | 0.1613  | 0.2586  | -0.0614 | 0.492   | 0.4339  | 0.2354  | 0.3093  | -0.1317 | 0.0278  | -0.132  |
| PBANKA_121960 | 0.2114  | 0.746   | 0.2414  | 0.0915  | 0.3291  | -0.2365 | -0.3852 | -0.3479 | -0.2532 | -0.4011 | -0.45   | -0.0412 |
| PBANKA_071460 | -0.7127 | -0.7927 | -1.1161 | -0.5657 | -0.3003 | -0.4651 | 0.2724  | 0.466   | 0.6076  | 0.3722  | 0.134   | 0.2476  |
| PBANKA_093360 | -0.5536 | -0.9212 | -1.1578 | -1.4698 | -1.2319 | -1.0313 | -0.67   | -0.232  | 0.2829  | -0.014  | -0.9011 | 0.5367  |
| PBANKA_141070 | 0.0466  | -0.4321 | 0.2982  | 0.3806  | 0.2475  | 0.0603  | -0.1106 | -0.6215 | -0.3881 | -0.9708 | -1.3087 | -1.2812 |
| PBANKA_060460 | 0.0264  | -0.8142 | -0.042  | 0.3813  | -0.0854 | -0.362  | -0.5454 | -0.3978 | -0.3088 | 0.1373  | 1.2168  | 0.0611  |
| PBANKA_030100 | 0.0363  | 0.1684  | -0.36   | -0.2919 | -0.5234 | -0.4998 | -0.2845 | 0.2585  | 0.9091  | 1.3738  | 0.8806  | -0.2395 |
| PBANKA_142480 | -0.3402 | 0.2554  | -0.3738 | -0.2961 | -0.1228 | -0.0845 | -1.0563 | -0.6159 | -0.3995 | -0.6343 | -0.2659 | 0.1832  |
| PBANKA_121900 | 0.5146  | 0.2893  | 0.1595  | 0.0106  | 0.1582  | 0.0286  | 0.0095  | 0.1558  | -0.2134 | -0.4394 | -0.1073 | -0.73   |
| PBANKA_062020 | -0.7924 | -0.7239 | -0.6111 | -0.2378 | -0.0641 | 0.1366  | 0.2679  | 0.3141  | 0.5365  | 0.3316  | -0.0951 | 0.4688  |
| PBANKA_140380 | 0.7017  | 0.5693  | 0.291   | -0.0306 | 0.2215  | -0.2507 | -0.2829 | -0.5332 | -0.769  | -0.6435 | -0.3692 | -0.4034 |
| PBANKA_020320 | 0.3589  | 0.0804  | 0.029   | 0.2511  | -0.0577 | 0.3717  | -0.167  | 0.0076  | 0.4595  | 0.4335  | 0.7863  | 1.1852  |
| PBANKA_050360 | 0.2334  | 0.1971  | 0.3602  | 0.395   | 0.2892  | -0.1013 | -0.4305 | -0.7889 | -0.8485 | -1.0324 | -0.7546 | 0.0493  |
| PBANKA_113170 | 0.1509  | 0.8728  | #####   | 0.0117  | 0.0105  | -0.5717 | 0.0717  | 0.0946  | -0.1324 | -0.2627 | -0.5465 | -0.2891 |
| PBANKA_144910 | -0.0039 | 0.5041  | 0.1488  | 0.3582  | 0.3526  | 0.4011  | 0.1624  | -0.2941 | -0.1219 | -0.2721 | -0.1428 | 0.0327  |
| PBANKA_123600 | 0.3986  | -0.2599 | 0.5369  | 0.6098  | 0.3825  | 0.5741  | 0.4885  | -0.0074 | -0.1991 | -0.9008 | -1.2642 | -0.8105 |
| PBANKA_145210 | -0.124  | 1.1967  | 0.0762  | 0.103   | -0.1005 | 0.0038  | 0.0053  | -0.3045 | -0.1842 | 0.0159  | 0.551   | 0.2209  |
| PBANKA_141510 | -0.0335 | 0.3139  | -0.0241 | 0.1171  | 0.1229  | -0.2106 | -0.2869 | -0.316  | -0.1105 | 0.0343  | -0.068  | -0.0529 |
| PBANKA_082640 | -0.5521 | -0.575  | -0.1412 | -0.0357 | 0.1747  | 0.2434  | -0.0669 | 0.1339  | -0.1005 | -0.5255 | -0.9236 | -1.0966 |
| PBANKA_100010 | -0.6583 | 0.1098  | -0.182  | -0.7458 | -0.2038 | 0.1953  | -0.1787 | 0.1414  | 0.5039  | 1.0949  | 1.7472  | 0.6842  |
| PBANKA_021030 | -0.2339 | -0.0981 | 0.0228  | 0.157   | 0.4265  | 0.7683  | 0.3167  | 0.0587  | 0.1178  | -0.1547 | -0.6405 | -0.4912 |
| PBANKA_081100 | -0.1759 | -0.1993 | 0.0692  | 0.1398  | -0.1413 | 0.1522  | 0.0703  | -0.2776 | -0.8643 | -1.1015 | -0.9972 | -0.7126 |
| PBANKA_130140 | -0.1894 | -0.4874 | -0.1177 | 0.2783  | 0.3612  | 0.341   | 0.058   | -0.6643 | -0.9007 | -1.4993 | -1.6182 | -1.4638 |
| PBANKA_041330 | -0.1433 | 0.0819  | 0.2107  | 0.666   | 0.1005  | 0.5484  | 0.1309  | -0.2374 | -0.5418 | -0.4516 | -0.5116 | -1.0631 |
| PBANKA_110910 | -0.4187 | -0.7241 | -0.1918 | 0.2749  | 0.3586  | -0.8229 | 0.5951  | 0.3699  | 0.0283  | -0.1667 | -0.3651 | -0.6473 |

|               |         |         |         |         |         |         |         |         |         |         |         |         |
|---------------|---------|---------|---------|---------|---------|---------|---------|---------|---------|---------|---------|---------|
| PBANKA_134770 | 0.2979  | 0.8837  | 0.0628  | 0.0887  | -0.1165 | 0.1482  | 0.0453  | -0.5062 | -0.4976 | -0.3957 | 0.5114  | -0.0314 |
| PBANKA_061130 | -0.3333 | -0.1468 | 0.0055  | 0.0737  | 0.3678  | 0.4191  | 0.2963  | 0.1707  | 0.1197  | 0.2301  | -0.473  | 0.1194  |
| PBANKA_050830 | 0.1458  | -0.315  | 0.0614  | 0.1092  | 0.02    | -0.0059 | 0.2106  | 0.5436  | 0.5678  | 0.4114  | 0.302   | 0.1922  |
| PBANKA_094150 | 0.3423  | 0.3904  | 0.5349  | 0.3583  | 0.2617  | 0.0237  | -0.2584 | -0.7591 | -1.0593 | -1.468  | -0.9694 | -0.4218 |
| PBANKA_102480 | -0.6584 | -0.5902 | -0.214  | -0.0466 | 0.2419  | 0.1835  | 0.4608  | 0.1362  | -0.1476 | -0.4573 | -0.9988 | -0.9635 |
| PBANKA_081340 | -0.0456 | 0.089   | -0.031  | 0.4507  | 0.039   | 0.3759  | 0.1595  | 0.0233  | -0.3046 | -0.1273 | -0.0596 | -0.1757 |
| PBANKA_110620 | 0.1848  | -0.1819 | 0.5772  | 0.0944  | 0.3376  | 0.87    | 0.3067  | 0.4135  | 0.1903  | 0.1355  | -0.2488 | -0.1113 |
| PBANKA_141560 | -0.4998 | -0.482  | -0.2976 | -0.0077 | 0.3144  | 0.2149  | 0.3062  | 0.31    | 0.2168  | 0.1725  | 0.1731  | -0.0956 |
| PBANKA_113240 | 0.0876  | -0.1488 | 0.0696  | 0.3092  | 0.1459  | 0.1196  | 0.499   | 0.2073  | 0.0538  | -0.1646 | -0.8732 | -0.764  |
| PBANKA_112980 | -0.504  | -0.2102 | -0.5601 | -0.5016 | -0.2034 | -0.24   | 0.3196  | 0.7205  | 0.6018  | 0.6035  | 0.6464  | 0.5106  |
| PBANKA_112340 | -0.7278 | -0.5643 | -0.4281 | 0.0386  | 0.154   | -0.239  | 0.4517  | 0.0267  | -0.0698 | -0.3289 | -0.314  | -0.3615 |
| PBANKA_146300 | -0.1321 | -0.1428 | -0.0958 | -0.1561 | 0.0663  | 0.268   | -0.294  | -0.0819 | 0.3122  | 0.5375  | 1.1175  | 1.1156  |
| PBANKA_121940 | -0.2194 | -0.0837 | 0.3031  | 0.9137  | 0.4401  | -0.4744 | 0.1915  | -0.2275 | -0.3801 | -1.0113 | -1.094  | -0.5817 |
| PBANKA_110390 | 0.2419  | -0.4624 | -0.1786 | 0.1699  | 0.3647  | 0.095   | 0.1861  | -0.1408 | 0.1332  | -0.2614 | -0.7145 | -0.7414 |
| PBANKA_080450 | -1.7285 | -0.9603 | -1.6812 | -1.2579 | -1.1872 | -0.47   | 0.3387  | 0.9697  | 1.3372  | 1.7474  | 0.6737  | 0.0237  |
| PBANKA_120870 | -0.4999 | -0.3342 | -0.992  | -0.5863 | -0.725  | -0.6592 | -0.47   | -0.0321 | 0.6539  | 0.6982  | 0.7734  | 2.3565  |
| PBANKA_092520 | 0.4447  | 0.8714  | 0.3286  | 0.0407  | 0.2268  | -0.0561 | -0.188  | -0.2808 | -0.2506 | -0.1998 | -0.0598 | 0.2898  |
| PBANKA_091470 | -0.5726 | -0.2085 | 0.0577  | -1.0322 | 0.1781  | -1.0059 | -0.0908 | -0.5011 | -1.0665 | -0.6937 | -0.7545 | -0.5772 |
| PBANKA_102530 | -0.3271 | 0.2269  | -0.1905 | -0.1646 | -0.0648 | -0.403  | 0.0381  | 0.2913  | 0.6261  | 1.0461  | 0.6728  | 0.3884  |
| PBANKA_142040 | -0.241  | 0.1848  | 0.0804  | -0.1485 | 0.0496  | 0.0148  | 0.1584  | -0.2238 | -0.2325 | 0.1449  | -0.412  | -0.5886 |
| PBANKA_130240 | 0.3079  | 1.1071  | 0.2331  | 0.1574  | -0.3344 | 0.2675  | -0.2632 | -0.231  | -0.3447 | -0.1375 | 0.3703  | 0.8697  |
| PBANKA_093640 | 0.1893  | -0.1642 | 0.4181  | 0.4839  | 0.0247  | 0.4096  | 0.2918  | 0.4043  | 0.1629  | -0.1285 | -1.0929 | -1.0262 |
| PBANKA_030710 | -0.3508 | -0.1166 | -0.0949 | -0.1872 | 0.0034  | -0.2343 | 0.471   | 0.7324  | 0.4033  | 0.5902  | -0.121  | -0.2323 |
| PBANKA_130780 | 0.5008  | 1.5036  | 0.0023  | -0.2992 | -0.2958 | -0.5156 | 0.0845  | -0.1697 | -0.3787 | -0.2647 | 0.2921  | 0.0553  |
| PBANKA_062190 | 0.5568  | 0.1452  | 0.3449  | 0.3764  | 0.0901  | 0.1439  | -0.1554 | -0.5043 | -0.3844 | -0.7142 | 0.2006  | 0.4044  |
| PBANKA_070990 | 0.5864  | 0.3474  | 0.1788  | 0.2033  | 0.1884  | 0.2654  | 0.1925  | 0.0268  | -0.0781 | -0.0837 | -0.216  | -0.6101 |
| PBANKA_111680 | 1.0724  | 0.6971  | 0.6563  | 0.124   | 0.0862  | 0.392   | -0.3889 | -0.2625 | -0.4366 | -0.6475 | -0.5636 | -0.0752 |
| PBANKA_101000 | 0.5535  | 0.099   | 0.631   | 0.3755  | 0.5366  | -0.2328 | -0.8559 | -1.1689 | -1.7384 | -2.085  | -1.5885 | -1.8165 |
| PBANKA_080590 | -0.3248 | -0.2159 | 0.1831  | -0.0351 | -0.1578 | 0.3171  | 0.2059  | 0.1905  | 0.0552  | 0.0159  | -0.2597 | -0.6308 |
| PBANKA_070840 | -0.2475 | -0.1267 | 0.3246  | 0.5436  | 0.2607  | 0.6016  | 0.4285  | 0.092   | -0.3454 | -0.6075 | -1.1976 | -0.5657 |
| PBANKA_062050 | 0.2643  | 0.0712  | -0.2476 | 0.4732  | 0.0962  | 0.2085  | -0.1621 | -0.3621 | -0.255  | -0.4813 | -0.9201 | -0.6497 |
| PBANKA_092610 | 0.4728  | -0.2484 | 0.1794  | 0.4964  | 0.2755  | 0.0431  | -0.2557 | -0.2726 | -0.122  | -0.2554 | 0.1222  | -0.342  |
| PBANKA_101430 | -0.0111 | 0.4578  | 0.1513  | 0.3993  | 0.0896  | 0.3187  | 0.1302  | -0.1757 | -0.4812 | -0.9271 | -0.7926 | -0.6175 |
| PBANKA_080910 | 0.3877  | 0.3304  | 0.0108  | 0.1337  | 0.2602  | 0.3788  | 0.0541  | -0.0489 | -0.3467 | -0.4693 | -0.5369 | -0.4794 |
| PBANKA_093590 | 0.3978  | 0.7129  | 0.0759  | 0.4145  | -0.1055 | 0.5295  | -0.3558 | -0.0312 | 0.0891  | -0.1592 | 0.3593  | -0.5028 |
| PBANKA_090420 | 0.4924  | 0.769   | 0.0507  | 0.2498  | 0.1164  | 0.6071  | -0.0418 | 0.3157  | 0.6406  | 0.5025  | 0.7018  | 1.1883  |
| PBANKA_061320 | -0.3446 | -0.4934 | -0.4885 | -0.0229 | -0.0337 | -0.0286 | 0.2581  | 0.4749  | 0.4445  | 0.4148  | 0.0788  | -0.132  |
| PBANKA_093420 | 0.1075  | 0.4024  | 0.1879  | 0.2167  | 0.3144  | -0.2297 | -0.4625 | -0.665  | -0.8533 | -0.7732 | -0.6124 | -0.8514 |
| PBANKA_133940 | 0.2956  | -0.4114 | 0.4432  | 0.2968  | 0.1346  | 0.0398  | -0.1558 | 0.1637  | 0.0533  | -0.1218 | -0.5106 | -1.1293 |
| PBANKA_103760 | 0.0987  | -0.1147 | -0.5074 | -0.7489 | -0.3758 | 0.6815  | -0.1511 | -0.2599 | 0.4215  | 0.0366  | 0.3227  | 0.7099  |
| PBANKA_100820 | -0.3266 | -0.2965 | -0.1826 | 0.1103  | -0.0755 | -0.0415 | -0.0731 | -0.719  | -0.7193 | -0.3534 | -0.3827 | -0.6577 |
| PBANKA_140290 | 0.1858  | 0.8685  | 0.4681  | 0.1352  | 0.0366  | 0.0782  | 0.1337  | -0.014  | 0.147   | -0.0007 | -0.074  | 0.4687  |
| PBANKA_030190 | -0.0999 | -0.0919 | -0.1185 | -0.0041 | -0.0805 | -0.2446 | -0.1692 | 0.3713  | 0.2679  | 0.5937  | 0.189   | -0.4041 |
| PBANKA_145400 | -0.0516 | 0.1751  | 0.2102  | -0.5044 | 0.2128  | 0.4443  | 0.1637  | 0.4986  | 0.2405  | 0.2473  | -0.3534 | 0.35    |
| PBANKA_111880 | 0.0587  | 0.0378  | -0.029  | 0.0457  | 0.0068  | -0.4812 | 0.2787  | 0.5476  | 0.4062  | 0.2514  | -0.3041 | -0.1263 |
| PBANKA_062210 | 0.1156  | -0.1145 | 0.0241  | 0.3504  | 0.0666  | 0.5758  | 0.034   | 0.2683  | 0.3549  | 0.3219  | 0.1671  | 0.2671  |
| PBANKA_112750 | 0.8115  | 0.5164  | 0.2825  | 0.0452  | 0.0899  | -0.2297 | -0.3109 | -0.3595 | -0.5335 | -0.6397 | 0.1986  | -0.4028 |
| PBANKA_041270 | -0.4407 | -0.0585 | 0.1645  | 0.4434  | 0.3313  | 0.4472  | 0.0951  | -0.4285 | -0.7712 | -0.9008 | -1.1757 | -0.9439 |
| PBANKA_110670 | 0.4312  | 0.2486  | 0.2301  | 0.3276  | 0.3553  | -0.0753 | -0.0307 | -0.673  | -0.7425 | -1.9849 | 0.1016  | -0.9166 |
| PBANKA_141120 | -0.1764 | -0.6815 | -0.0458 | 0.0798  | -0.0259 | 0.2639  | 0.256   | 0.331   | 0.7137  | 0.5142  | 0.217   | -0.479  |
| PBANKA_070370 | -0.2781 | 0.5187  | -0.2936 | -0.3226 | -0.0427 | 0.4682  | 0.084   | 0.4341  | 0.6422  | 0.7944  | 0.7353  | 0.759   |
| PBANKA_062070 | -0.388  | -0.2919 | -0.1282 | -0.129  | 0.1438  | 0.0154  | 0.0327  | 0.4211  | 0.1029  | 0.4849  | 0.8431  | 1.1057  |
| PBANKA_134650 | -0.8762 | -0.2604 | -0.0925 | 0.1905  | 0.3413  | 0.4864  | 0.2314  | 0.0341  | 0.1471  | -0.2171 | -0.5256 | -1.4268 |
| PBANKA_090320 | 0.2728  | -0.1059 | 0.1338  | 0.1538  | 0.0511  | -0.7497 | -0.2235 | -0.3385 | -0.1109 | -0.4943 | -0.2784 | -0.043  |
| PBANKA_130250 | 0.094   | 1.0475  | -0.2829 | -0.0724 | -0.0825 | 0.5093  | 0.1164  | -0.008  | 0.0518  | -0.0823 | 0.1399  | 0.7997  |
| PBANKA_094250 | -0.1293 | 0.4052  | -0.1301 | -0.1756 | 0.187   | -0.2706 | -0.1198 | -0.2558 | -0.7493 | -0.7748 | -0.2753 | -0.0956 |
| PBANKA_134300 | 0.755   | 0.7308  | 0.5123  | 1.0875  | 0.8983  | 0.4185  | -0.3876 | -0.5639 | -0.1463 | 0.1223  | 0.7124  | 1.552   |
| PBANKA_090570 | -0.373  | 0.7357  | 0.1121  | 0.3178  | -0.2394 | 0.2978  | 0.2867  | -0.1758 | -0.0252 | -0.0169 | -0.0806 | 0.9197  |
| PBANKA_093410 | -0.8781 | -1.6665 | -0.5981 | -1.692  | -1.0336 | -0.9707 | -0.9628 | -1.5653 | -1.6087 | -0.7664 | -0.9118 | -0.0192 |
| PBANKA_145130 | 0.2211  | 0.357   | 0.3396  | 0.3052  | 0.4038  | 0.6206  | -0.5225 | -0.6772 | -0.6629 | -1.1942 | -0.9285 | -0.6213 |
| PBANKA_120520 | -0.6434 | -0.2151 | -0.0744 | -0.0162 | 0.1938  | 0.3623  | 0.4431  | 0.3668  | 0.3475  | 0.1693  | -0.179  | 0.4165  |
| PBANKA_094240 | -0.1956 | 0.1317  | -0.1694 | -0.7418 | -0.0449 | -0.172  | 0.0796  | 0.5037  | 0.547   | 0.6288  | 0.2567  | 0.806   |
| PBANKA_144700 | -1.1527 | -0.6535 | -0.4259 | 0.0686  | -0.1068 | 0.3761  | 0.2691  | 0.0138  | -0.0346 | -0.0448 | -0.3536 | -0.3576 |

|               |         |         |         |         |         |         |         |         |         |         |         |         |
|---------------|---------|---------|---------|---------|---------|---------|---------|---------|---------|---------|---------|---------|
| PBANKA_020020 | 0.3554  | -0.2612 | 0.2047  | 0.7389  | 0.0089  | -0.1346 | 0.1062  | 0.0761  | 0.5893  | 0.7055  | 1.1182  | 1.6297  |
| PBANKA_144660 | -0.0002 | 0.7055  | -0.0584 | -0.008  | 0.0691  | -0.1185 | -0.1546 | 0.1495  | 0.2109  | 0.3033  | -0.0453 | 0.4776  |
| PBANKA_103110 | -0.1007 | 0.1523  | -0.1013 | -0.3459 | 0.0185  | -0.6157 | -0.3014 | -0.1501 | -0.4317 | -0.3743 | 0.0135  | -0.3178 |
| PBANKA_145780 | -0.2947 | -0.323  | -0.1601 | 0.0751  | 0.3852  | 0.1339  | -0.2099 | 0.3421  | 0.0254  | 0.3422  | 0.0314  | -0.4524 |
| PBANKA_080320 | 0.1831  | 0.0808  | -0.1991 | -0.0364 | 0.0209  | 0.0179  | -0.1327 | -0.0947 | -0.1555 | 0.0612  | -0.2582 | -0.1366 |
| PBANKA_140660 | -1.3633 | -0.9957 | -0.4948 | -0.0265 | 0.0231  | -0.2046 | 0.6234  | 0.3384  | 0.0976  | -0.0188 | -0.9852 | -0.7932 |
| PBANKA_143460 | -0.0704 | -0.1613 | -0.0132 | -0.1366 | 0.0497  | 0.1765  | 0.1099  | 0.5714  | 0.4215  | 0.6434  | 0.4433  | 0.1843  |
| PBANKA_144340 | 0.0999  | 0.5679  | -0.307  | -0.1594 | -0.4028 | 0.1588  | 0.2833  | -0.0618 | 0.0407  | -0.0072 | -0.1103 | -0.4012 |
| PBANKA_142050 | -0.0585 | 0.5594  | 0.124   | -0.1936 | -0.2435 | -0.2646 | -0.0298 | -0.2503 | -0.096  | 0.4272  | 0.9695  | 1.4387  |
| PBANKA_101780 | 0.5649  | 0.2715  | 0.0274  | 0.4392  | -0.0302 | -0.1122 | -0.3134 | 0.0625  | -0.2055 | -0.4881 | -0.3822 | -0.0499 |
| PBANKA_135000 | -0.3355 | -0.2304 | -0.2912 | -0.1628 | -0.3014 | -0.0504 | -0.3276 | -1.0668 | -0.3983 | -0.3871 | -0.2356 | -0.8846 |
| PBANKA_092560 | -1.1137 | -0.8278 | -1.0511 | -0.5271 | -0.2634 | 0.0764  | 0.5826  | 0.7103  | 0.5744  | 0.6666  | -0.4422 | -0.1153 |
| PBANKA_010780 | -0.0029 | -0.2733 | -0.1634 | 0.1493  | 0.0258  | 0.4265  | -0.0914 | -0.2017 | 0.0697  | -0.1956 | 0.0336  | 0.6516  |
| PBANKA_082670 | 0.5179  | 1.1576  | 0.5138  | -0.1212 | 0.5179  | -0.256  | -0.9559 | -0.9416 | -1.1014 | -1.1795 | 0.5165  | 1.0391  |
| PBANKA_124190 | -0.0146 | -0.68   | 0.4277  | 0.741   | 0.796   | 0.4459  | -0.1261 | -0.6812 | -0.7692 | -1.7579 | -1.6938 | -1.8966 |
| PBANKA_041030 | 0.0063  | 0.0347  | 0.1512  | 0.5126  | 0.2714  | 0.3316  | 0.12    | 0.1726  | -0.1204 | -0.3893 | -0.3893 | -0.7735 |
| PBANKA_130360 | -0.2773 | -0.2044 | 0.1294  | -0.1035 | 0.1701  | 0.2825  | 0.1587  | -0.0887 | -0.9397 | -0.841  | -0.8612 | -0.7515 |
| PBANKA_041350 | -0.1239 | -0.3202 | 0.0947  | -0.2973 | 0.0618  | 0.8838  | 0.0599  | 0.0251  | 0.2533  | 0.1345  | -0.0807 | 0.2713  |
| PBANKA_091360 | -0.6194 | -0.4714 | -1.0914 | -1.1229 | -1.1957 | -1.7668 | -0.6195 | -0.2948 | 0.1745  | 0.4588  | 0.6     | 0.471   |
| PBANKA_041170 | -0.3123 | 0.1883  | 0.1962  | 0.3406  | 0.2334  | 0.5041  | 0.3365  | 0.2653  | -0.0975 | -0.6392 | -0.6314 | -0.9076 |
| PBANKA_040230 | -0.6325 | -0.4668 | -0.4788 | 0.2377  | 0.4256  | 0.9001  | 0.7635  | 0.5497  | 0.8367  | 0.4136  | -0.1042 | -0.3713 |
| PBANKA_122380 | 0.0411  | 0.4626  | 0.0004  | -0.1829 | -0.056  | 0.171   | 0.1052  | 0.4187  | 0.1475  | 0.39    | -0.1768 | -0.2971 |
| PBANKA_102290 | 0.0015  | 0.3071  | -0.262  | 0.3151  | 0.1059  | 0.3391  | 0.0127  | 0.3625  | 0.1233  | 0.0087  | -0.454  | 0.1173  |
| PBANKA_021050 | 0.1645  | 0.2253  | 0.2833  | 0.2606  | 0.4785  | -0.252  | 0.1177  | 0.0955  | 0.1471  | 0.0025  | -0.0891 | -0.1408 |
| PBANKA_062130 | -0.3758 | -0.8293 | -0.6946 | -0.8374 | -0.2605 | -1.0855 | -0.6038 | -0.7655 | -0.4435 | -0.2375 | -0.9693 | -0.7842 |
| PBANKA_143350 | -0.1061 | -1.0452 | -1.2685 | 0.3207  | -0.1424 | 0.219   | -0.0909 | 0.2475  | -0.3173 | -0.2696 | -0.2934 | -0.2233 |
| PBANKA_020340 | 0.2212  | -0.1389 | 0.1182  | 0.7706  | 0.1258  | 0.5966  | 0.1513  | -0.0132 | -0.2506 | -0.6945 | -0.8578 | -0.6182 |
| PBANKA_061740 | 0.1243  | 0.3901  | 0.1067  | -0.0241 | 0.2092  | 0.0172  | 0.1284  | 0.2043  | -0.1902 | -0.1796 | -0.3164 | -0.4479 |
| PBANKA_122630 | -0.0999 | -0.6816 | -0.1077 | -0.0686 | -0.4805 | -0.2377 | -0.1277 | -0.1249 | -0.0535 | 0.529   | 0.6079  | 0.9529  |
| PBANKA_111420 | 0.7021  | 0.843   | 0.114   | -0.2485 | 0.4991  | -0.7983 | -0.0782 | -0.2222 | -0.009  | -0.247  | 0.8049  | 0.8581  |
| PBANKA_140160 | -0.531  | -0.1925 | -0.1122 | -0.035  | 0.3274  | 0.3949  | 0.5297  | 0.2673  | -0.2551 | -0.6123 | -1.2653 | -1.2629 |
| PBANKA_136310 | 0.3204  | 0.1463  | 0.0361  | -0.041  | -0.4535 | -0.1911 | -0.5615 | 0.1762  | 0.709   | 0.844   | 0.5861  | 1.1275  |
| PBANKA_135910 | 0.143   | 0.739   | 0.3273  | 0.5127  | 0.1528  | 0.283   | -0.3137 | -0.825  | -0.566  | -0.9332 | 0.0168  | -0.1963 |
| PBANKA_050850 | -0.6846 | -0.469  | -0.0038 | 0.3514  | 0.2155  | 0.3809  | 0.3194  | 0.1561  | -0.127  | -0.5215 | -1.0479 | -0.9624 |
| PBANKA_140240 | -0.5053 | -0.0911 | -0.6849 | -0.1641 | -0.306  | -0.57   | -0.701  | -0.5476 | 0.2028  | 0.1851  | 0.6228  | 1.1525  |
| PBANKA_070780 | 0.0966  | 0.6352  | -0.0605 | 0.0532  | 0.1789  | -0.2667 | -0.051  | -0.3732 | -0.1443 | -0.4558 | -0.3845 | -0.1332 |
| PBANKA_090850 | -0.349  | -0.7482 | -0.0856 | -0.1934 | 0.0108  | 0.3649  | -0.1173 | -0.2858 | 0.1265  | 0.015   | -0.3546 | -0.438  |
| PBANKA_122370 | 0.4055  | 0.337   | 0.2877  | 0.412   | 0.299   | 0.1807  | -0.0863 | -0.1906 | 0.1404  | -0.0609 | 0.3508  | 0.1106  |
| PBANKA_062240 | 0.0923  | 0.1839  | -0.0297 | -0.5062 | -0.4109 | -0.1854 | 0.0652  | -0.0289 | -0.0577 | 0.387   | 0.6601  | 0.0808  |
| PBANKA_102970 | 0.4108  | 0.4613  | 0.3246  | 0.4697  | 0.382   | 0.4062  | -0.3115 | -0.6923 | -0.4373 | -0.5177 | -0.4555 | -0.3476 |
| PBANKA_060250 | 0.5343  | -0.22   | 0.0643  | -0.1613 | -0.2656 | -0.1342 | -0.2728 | -0.3577 | 0.2555  | -0.0843 | -0.0917 | 0.5043  |
| PBANKA_101540 | -0.4796 | -0.1471 | -0.153  | -0.0757 | 0.0133  | 0.0771  | 0.2578  | 0.3099  | 0.6485  | 0.7184  | 1.0681  | 1.3092  |
| PBANKA_092230 | -0.2391 | 1.3766  | 0.2631  | -0.1585 | -0.0635 | 0.2093  | 0.1157  | -0.298  | -0.6415 | -0.1782 | -0.0193 | -0.1011 |
| PBANKA_031470 | -0.4631 | -1.4268 | -0.6473 | 0.0655  | 0.0172  | 0.3374  | 0.3346  | 0.1999  | 0.0667  | -0.3524 | -0.4726 | -0.4653 |
| PBANKA_123790 | -0.5868 | -0.348  | -0.2549 | -0.8843 | -0.3479 | -0.5804 | -0.4221 | -0.0068 | -0.8335 | -0.471  | -0.6076 | -0.8542 |
| PBANKA_092540 | -0.302  | 0.3879  | -0.0764 | -0.1289 | -0.0725 | -0.2172 | -0.0266 | 0.2081  | 0.5307  | 0.651   | 0.3894  | 0.398   |
| PBANKA_020520 | 0.2233  | 0.048   | 0.08    | -0.2307 | 0.2414  | 0.0311  | -0.2986 | -0.2105 | -0.1907 | -0.0732 | -0.1633 | 0.226   |
| PBANKA_080550 | 0.0795  | 0.5924  | -0.2509 | 0.0895  | -0.1487 | -0.3619 | -0.2999 | -0.3141 | -0.2414 | -0.1188 | -0.1791 | 0.0929  |
| PBANKA_061710 | 0.8067  | -0.6327 | 0.7281  | -0.1777 | 1.082   | -0.377  | -0.2376 | -0.6233 | -0.441  | -0.3503 | 0.9312  | 1.4558  |
| PBANKA_050590 | -0.1393 | 0.2125  | -0.0565 | -0.0212 | -0.0262 | 0.1186  | -0.1052 | 0.1481  | 0.6409  | 0.7501  | 0.4837  | 0.3549  |
| PBANKA_113530 | 0.3832  | 0.5243  | -0.0222 | -0.268  | -0.3786 | -0.5816 | -0.391  | -0.3024 | 0.0133  | 0.4572  | 1.0499  | 1.2762  |
| PBANKA_143410 | 0.2492  | 1.0491  | 0.0676  | -0.0671 | 0.0946  | -0.1603 | -0.5203 | 0.0591  | -0.1705 | 0.3727  | 1.3177  | 1.3432  |
| PBANKA_131770 | -0.1108 | -0.8509 | -0.4883 | -0.5457 | -0.2665 | -0.2829 | -0.245  | -0.6143 | -0.5851 | -0.7025 | -1.128  | -0.6512 |
| PBANKA_140230 | -0.1811 | -0.0519 | 0.1517  | 0.1738  | -0.0181 | 0.0181  | 0.2153  | 0.184   | 0.0834  | 0.1092  | 0.1041  | -0.1141 |
| PBANKA_111230 | -0.2325 | 0.3026  | 0.0165  | -0.0525 | -0.1144 | 0.0749  | 0.0024  | -0.1523 | -0.5027 | -0.6546 | -0.5065 | -0.7405 |
| PBANKA_052190 | 0.0387  | 0.0272  | 0.0967  | 0.1775  | 0.139   | 0.1138  | -0.0517 | -0.0756 | 0.084   | -0.0108 | 0.0537  | -0.1215 |
| PBANKA_090920 | 0.2934  | 0.1118  | 0.1945  | 0.2361  | 0.1387  | -0.0161 | 0.1008  | 0.1967  | 0.034   | -0.1582 | -0.4022 | -0.3851 |
| PBANKA_102180 | 0.2492  | 0.6893  | 0.153   | 0.2601  | 0.051   | 0.8247  | -0.1212 | -0.2899 | -0.3705 | -0.4734 | -0.1332 | -0.428  |
| PBANKA_111800 | 0.0112  | 0.4905  | 0.0739  | 0.3588  | -0.3731 | -0.1459 | -0.3018 | 0.1558  | 0.069   | 0.0747  | -0.1397 | 0.4347  |
| PBANKA_111430 | 0.1951  | -0.6961 | 0.1791  | 0.0623  | -0.0981 | 0.4156  | 0.2036  | 0.2431  | 0.3766  | 0.2768  | 0.6133  | 0.0057  |
| PBANKA_051010 | -0.4164 | -0.1668 | -0.6366 | 0.1062  | -0.5685 | -0.2665 | 0.6998  | 0.8872  | 0.9418  | 0.9971  | 0.4367  | 0.666   |
| PBANKA_136490 | -0.0045 | -0.584  | -0.0606 | 0.0357  | 0.181   | 0.4725  | 0.2688  | -0.0693 | 0.4366  | 0.5929  | 1.1985  | 1.918   |
| PBANKA_083300 | -1.9775 | -1.7708 | -1.4874 | -0.5694 | 0.1345  | 0.3034  | 0.6774  | 0.5358  | 0.4332  | 0.4054  | -0.3975 | -0.5526 |



|               |         |         |         |         |         |         |         |         |         |         |         |         |
|---------------|---------|---------|---------|---------|---------|---------|---------|---------|---------|---------|---------|---------|
| PBANKA_090640 | 0.3228  | 0.5408  | 0.1309  | 0.1183  | -0.3619 | -0.0752 | 0.2153  | -0.1056 | -0.3153 | -1.1048 | -0.6335 | 0.7141  |
| PBANKA_070040 | 1.07    | -0.843  | 1.787   | -2.039  | -2.6983 | -1.1727 | -0.7389 | -0.2349 | -1.5427 | -1.6484 | -1.0952 | -0.9628 |
| PBANKA_062300 | -0.0787 | -0.1863 | -0.1939 | -0.2773 | -0.4526 | -0.2748 | -0.6456 | 0.0245  | 0.5747  | 0.804   | 1.3286  | 1.6263  |
| PBANKA_144840 | 0.1392  | -0.1821 | 0.3741  | 0.4557  | 0.4865  | 0.2821  | 0.471   | 0.3236  | 0.2062  | -0.3885 | -0.8838 | -0.15   |
| PBANKA_051790 | -0.1999 | 0.291   | -0.1016 | 0.3792  | -0.1203 | 0.2918  | 0.2336  | -0.2421 | -0.0697 | -0.1373 | -0.2227 | 0.4583  |
| PBANKA_124070 | 0.6901  | -1.0654 | 0.0481  | 0.3415  | 0.0448  | -0.7831 | -0.8853 | -0.4582 | -0.4036 | -0.4073 | 0.4183  | 0.6334  |
| PBANKA_141840 | -0.4496 | -0.6191 | -0.1634 | 0.3371  | 0.201   | 0.3514  | 0.1111  | -0.2369 | -0.2418 | -0.4523 | -1.2022 | -1.0418 |
| PBANKA_132600 | -0.468  | 0.4833  | 0.2267  | -0.478  | -0.1191 | 0.0803  | -0.2959 | -0.2418 | -0.4209 | -0.1455 | 0.0513  | 0.365   |
| PBANKA_093330 | 0.4272  | -0.4213 | 0.2131  | 0.6838  | 0.2705  | 0.4756  | 0.2008  | -0.0498 | -0.0616 | -0.4229 | -0.3805 | -0.9252 |
| PBANKA_145950 | -2.3338 | -2.4596 | -2.5718 | -0.9467 | -1.2632 | -0.0653 | 0.9865  | 1.1148  | 1.6378  | 1.5386  | 0.7135  | 0.9342  |
| PBANKA_060140 | 0.1593  | -0.0232 | 0.3346  | 0.6764  | 0.2762  | 0.0877  | 0.0171  | -0.3557 | -0.6272 | -0.8294 | -0.8714 | -0.7808 |
| PBANKA_141620 | 0.3322  | -0.2863 | 0.3834  | 0.5486  | 0.1299  | 0.4167  | -0.3498 | -0.4935 | -0.2405 | -0.567  | -0.1108 | 0.9832  |
| PBANKA_122910 | 1.2866  | 1.3237  | 0.4893  | 0.2632  | 0.1914  | -0.1266 | -0.6875 | -0.4262 | -0.6847 | -0.6118 | 0.5172  | 1.0564  |
| PBANKA_082750 | 0.4517  | 0.5771  | 0.3125  | 0.262   | 0.1302  | 0.0431  | -0.1511 | -0.194  | -0.0199 | -0.1669 | 0.4205  | 0.7279  |
| PBANKA_122140 | 0.3064  | -0.048  | 0.0858  | 0.197   | 0.1867  | 0.4246  | 0.4415  | 0.1098  | 0.3051  | -0.2019 | -0.42   | -0.446  |
| PBANKA_122440 | 0.0385  | 0.2767  | 0.1497  | -0.0624 | -0.3072 | 0.6528  | 0.3718  | 0.2128  | 0.117   | 0.067   | -0.0059 | -0.1544 |
| PBANKA_100690 | 0.478   | 0.1919  | 0.396   | -0.1575 | 0.0944  | 0.4078  | -0.0711 | -0.1007 | -0.3572 | -0.6067 | 0.3441  | 0.1684  |
| PBANKA_031310 | 0.3512  | 0.1903  | -0.0428 | 0.0219  | 0.0396  | -0.1039 | -0.1896 | -0.1199 | -0.4416 | -0.3712 | -1.089  | -0.3038 |
| PBANKA_136210 | -0.1584 | -0.0351 | 0.0704  | 0.231   | 0.4504  | 0.2093  | 0.11    | 0.4107  | 0.2531  | 0.3812  | 0.1555  | 0.6251  |
| PBANKA_092490 | 0.3073  | -0.0921 | 0.2781  | 0.0403  | 0.534   | -0.1519 | -0.041  | -0.6606 | -1.1297 | -1.363  | -0.3873 | -0.9146 |
| PBANKA_111140 | -0.2926 | 0.8304  | 0.3244  | -0.2009 | 0.0004  | -0.105  | -0.4781 | -0.3263 | -0.7405 | -0.2824 | -0.319  | -0.7603 |
| PBANKA_020790 | -0.0114 | -0.4769 | 0.0329  | -0.5701 | -0.3209 | -0.1078 | 0.1438  | 0.8924  | 0.913   | 0.5565  | 0.4969  | 0.2021  |
| PBANKA_131090 | 0.3423  | 0.7027  | 0.4236  | 0.0812  | 0.1415  | -0.0429 | -0.2139 | -0.3849 | -0.8356 | -0.8276 | -0.6377 | -0.5032 |
| PBANKA_113270 | -0.0476 | 0.3085  | -0.3566 | -0.2848 | 0.0325  | -0.0555 | -0.4972 | -0.1134 | -0.1289 | 0.3236  | -0.0067 | -0.3748 |
| PBANKA_145160 | 0.1114  | 0.3949  | 0.4806  | 0.4083  | 0.4452  | 0.7126  | 0.2411  | 0.1901  | 0.0258  | -0.0386 | -0.0774 | -0.6568 |
| PBANKA_060780 | -0.4984 | -0.2486 | -0.1278 | 0.1069  | 0.1441  | -0.053  | 0.2133  | 0.4211  | 1.35    | 1.0132  | 0.2225  | 0.3417  |
| PBANKA_121770 | -0.5732 | -0.2236 | -0.0547 | -0.4843 | 0.3336  | -0.1342 | -0.4534 | -0.3809 | -0.6225 | -0.5529 | -0.0807 | -0.3765 |
| PBANKA_123030 | 0.4064  | -0.0168 | 0.3593  | 0.5033  | 0.3058  | 0.3886  | -0.085  | -0.313  | -0.5727 | -0.8703 | -0.789  | -1.2083 |
| PBANKA_083120 | -0.3502 | -0.4936 | -0.7108 | -0.7035 | 0.0362  | 0.3635  | 0.1325  | 0.8798  | 0.7063  | 0.9073  | 0.4334  | 0.0829  |
| PBANKA_010670 | 0.1227  | 0.1656  | 0.1404  | 0.1808  | 0.3002  | 0.0252  | 0.1934  | 0.349   | 0.2016  | 0.0307  | -0.3458 | -0.4926 |
| PBANKA_070320 | -0.1832 | -0.1346 | 0.1601  | -0.1341 | 0.1147  | 0.2468  | 0.184   | 0.0214  | -0.5388 | -0.3048 | -1.0435 | -1.0057 |
| PBANKA_114040 | 0.1831  | 0.5174  | 0.2387  | 0.4769  | 0.2403  | 0.547   | 0.0648  | 0.056   | -0.0862 | -0.4369 | -0.2042 | -0.384  |
| PBANKA_140760 | 0.4096  | -0.0868 | 0.3295  | 0.5361  | 0.3566  | -0.1556 | 0.0189  | -0.1547 | -0.3618 | -0.7895 | 0.0584  | -0.5339 |
| PBANKA_051770 | -0.0379 | -0.1604 | 0.1804  | 0.1379  | 0.1376  | -0.0018 | -0.237  | -0.4454 | -0.753  | -0.6737 | -0.5441 | -0.5754 |
| PBANKA_121080 | 0.5403  | 0.7568  | 0.7057  | 0.4282  | 0.4267  | -0.3161 | -0.3161 | -1.0341 | -1.5914 | -1.923  | -0.972  | -1.5374 |
| PBANKA_093550 | -0.6023 | -0.1453 | -0.2722 | -0.1036 | -0.019  | -0.1223 | 0.3225  | 0.5408  | 0.5236  | 0.7511  | 0.0664  | -0.4034 |
| PBANKA_100490 | -0.0796 | -0.2003 | 0.1222  | -0.1856 | 0.1381  | 0.5136  | -0.2473 | -0.2084 | -0.0728 | -0.0623 | 0.1583  | 0.2698  |
| PBANKA_112130 | -0.2513 | -0.1196 | 0.2578  | 0.4748  | 0.278   | 0.152   | 0.0835  | -0.0017 | -0.3051 | -0.4568 | -0.3436 | -0.2258 |
| PBANKA_082870 | -0.0267 | 0.2816  | 0.0129  | 0.0509  | 0.1645  | 0.4924  | 0.2061  | 0.1672  | -0.1479 | -0.2296 | -0.4949 | -0.5321 |
| PBANKA_010870 | -0.0301 | -0.0377 | -0.0445 | 0.1348  | 0.0536  | 0.1988  | -0.1493 | -0.4801 | -0.6358 | -0.4093 | -0.0821 | 0.1323  |
| PBANKA_136390 | -0.1737 | 0.3424  | 0.189   | 0.4348  | 0.2178  | 0.2943  | 0.0433  | -0.3704 | -0.1753 | -0.5952 | -0.379  | -0.2042 |
| PBANKA_140140 | 0.1467  | 0.6345  | 0.3666  | 0.4398  | 0.3849  | 0.2262  | -0.1482 | -0.16   | 0.1188  | -0.2688 | -0.477  | 0.4871  |
| PBANKA_101050 | 0.2931  | 0.9225  | 0.3649  | 0.1505  | 0.3827  | -0.1316 | -0.5332 | -0.621  | -0.5654 | -0.9112 | 0.0866  | 0.0583  |
| PBANKA_144110 | -0.1735 | -0.1252 | -0.0379 | 0.2389  | 0.1276  | 0.1393  | 0.3691  | 0.1853  | -0.1734 | -0.3473 | -1.0287 | -1.6537 |
| PBANKA_020880 | 0.2046  | -0.1068 | -0.1346 | -0.0841 | -0.1255 | -0.3541 | -0.1988 | 0.1959  | 0.5643  | 0.8824  | 0.6117  | 0.5287  |
| PBANKA_133530 | 0.0063  | -0.3428 | 0.256   | -0.4551 | 0.0204  | 0.1272  | 0.0485  | 0.0374  | -0.2262 | -0.0478 | -0.519  | -0.3139 |
| PBANKA_010950 | 0.0048  | 0.1233  | 0.2946  | 0.232   | 0.1778  | -0.0549 | 0.1792  | -0.1351 | -0.6761 | -1.0541 | -1.5949 | -1.8662 |
| PBANKA_110730 | 0.1942  | 0.914   | -0.0884 | -0.2218 | 0.3241  | 0.1353  | -0.2696 | -0.1101 | -0.3106 | -0.1771 | -0.6898 | -0.2143 |
| PBANKA_120410 | -0.035  | 0.8016  | -0.0163 | -0.2306 | -0.0273 | 0.074   | 0.1686  | 0.3222  | -0.3327 | 0.2951  | 0.1436  | -0.1438 |
| PBANKA_061540 | 0.0513  | 0.5393  | 0.0853  | 0.7567  | 0.3381  | 0.0521  | -0.266  | -0.382  | -0.5811 | -0.5537 | -0.4432 | -0.7464 |
| PBANKA_145260 | 0.2591  | -0.4627 | 0.414   | 0.5988  | 0.3709  | 0.322   | -0.2546 | -1.0211 | -1.0353 | -1.4867 | -1.9148 | -1.8691 |
| PBANKA_080250 | -0.6126 | 0.0061  | -0.1506 | -0.2478 | -0.0829 | -1.0051 | 0.3552  | 0.2519  | 0.3634  | 1.0484  | -0.0436 | 0.3995  |
| PBANKA_144090 | 0.1025  | -0.0151 | 0.0119  | -0.0107 | 0.3156  | 0.4903  | -0.3107 | -0.2734 | -0.5245 | -0.2193 | -0.6723 | -1.0793 |
| PBANKA_050570 | -0.248  | -0.1996 | -0.5085 | -0.307  | -0.5847 | -0.2573 | -0.5281 | -0.2398 | 0.3522  | 0.5167  | 1.018   | 1.3364  |
| PBANKA_145720 | -0.7876 | -0.1256 | -0.2987 | -0.4454 | -0.346  | -0.2501 | 0.1475  | 0.6041  | 0.3714  | 0.135   | 0.0122  | 0.1403  |
| PBANKA_093600 | 0.1204  | 0.6189  | -0.0201 | 0.16    | 0.0488  | 0.1378  | 0.0961  | 0.4469  | 0.579   | 0.4052  | 0.779   | 0.5346  |
| PBANKA_102550 | 0.0622  | 0.7589  | 0.1593  | -0.2207 | 0.1974  | 0.0626  | -0.0731 | -0.0448 | -0.0398 | -0.0201 | 0.3016  | -0.2682 |
| PBANKA_103230 | 0.605   | 1.0892  | 0.3108  | 0.0607  | -0.18   | -0.5773 | -0.8181 | -0.4411 | -0.4195 | 0.1425  | 1.3523  | 1.0407  |
| PBANKA_145040 | -0.1048 | -1.2762 | 0.0185  | -0.1696 | -0.1517 | 0.1429  | 0.0634  | 0.1352  | 0.5499  | 0.5055  | 0.0349  | 0.4015  |
| PBANKA_091770 | 0.3804  | 0.5533  | -0.1509 | 0.0974  | -0.2268 | -0.1066 | -0.3279 | -0.364  | -0.318  | -0.0857 | 0.7136  | 1.1012  |
| PBANKA_135520 | -0.8905 | -0.7905 | -1.0438 | -0.9167 | -0.397  | -0.7634 | -0.5073 | -0.8457 | -1.0135 | -0.7069 | -0.7608 | -0.7857 |
| PBANKA_142320 | 0.1504  | 0.5593  | -0.0348 | -0.2313 | -0.1919 | -0.075  | 0.0115  | -0.4317 | 0.3668  | 0.5182  | 1.2959  | 0.7399  |
| PBANKA_145640 | 0.226   | -0.6224 | 0.5394  | 0.1423  | 0.0797  | 0.3668  | 0.1888  | 0.1188  | -0.5483 | -0.1159 | -0.412  | -1.1605 |

|               |         |         |         |         |         |         |         |         |         |         |         |         |
|---------------|---------|---------|---------|---------|---------|---------|---------|---------|---------|---------|---------|---------|
| PBANKA_080750 | 0.2755  | 0.0184  | 0.3824  | 0.4822  | -0.4373 | 0.3     | 0.1494  | -0.3335 | -0.3015 | -0.2746 | -0.0902 | 0.3769  |
| PBANKA_121480 | 0.5544  | 0.3881  | 0.2678  | -0.135  | 0.0727  | -0.4851 | -0.1761 | -0.5142 | 0.028   | -0.1588 | 0.2316  | 0.0564  |
| PBANKA_040840 | 0.3135  | 0.474   | 0.3586  | 0.0524  | 0.2735  | 0.1868  | 0.1676  | -0.0538 | -0.0551 | 0.0609  | 0.2444  | -0.2348 |
| PBANKA_050730 | -0.2454 | -0.0036 | -0.0096 | -0.2093 | -0.066  | -0.0729 | -0.0512 | 0.0788  | 0.4779  | 0.6767  | 0.2594  | 0.9199  |
| PBANKA_020410 | 0.2254  | 0.4197  | -0.0078 | 0.2844  | 0.1962  | -0.0489 | -0.0158 | -0.3156 | -0.3525 | -0.4236 | -0.1408 | 0.4364  |
| PBANKA_133540 | 0.3964  | 0.4224  | 0.0977  | 0.3262  | 0.2047  | 0.2966  | -0.009  | 0.2082  | 0.0565  | 0.1931  | 0.1566  | -0.1332 |
| PBANKA_120560 | -0.2314 | -0.4607 | -0.1521 | -0.1531 | -0.0999 | 0.4034  | 0.3157  | 0.815   | 0.5288  | 0.5737  | -0.7561 | -0.8126 |
| PBANKA_051840 | -0.2433 | -0.3742 | 0.1216  | 0.552   | -0.0255 | 0.4341  | 0.4598  | 0.4736  | 0.2542  | 0.1404  | -0.2874 | -0.4553 |
| PBANKA_110420 | 0.0324  | -0.4101 | 0.379   | 0.4819  | 0.518   | 0.3975  | 0.198   | -0.128  | -0.1378 | -0.4499 | -0.2757 | -0.8426 |
| PBANKA_071400 | 0.4099  | 0.4309  | 0.1413  | -0.4258 | -0.1617 | -0.0504 | -0.2533 | 0.0291  | 0.0957  | 0.2786  | 0.6935  | 1.6574  |
| PBANKA_082340 | 0.1966  | 0.2296  | 0.5071  | 0.3703  | 0.55    | 0.1872  | -0.4607 | -1.1273 | -1.4757 | -2.0844 | -1.4033 | -1.844  |
| PBANKA_093450 | -0.0791 | 0.0127  | -0.5073 | -0.1663 | -0.215  | -0.5587 | -0.4378 | 0.0901  | 0.4699  | 0.5597  | 0.9488  | 0.3548  |
| PBANKA_050820 | 0.1581  | 0.1592  | 0.1682  | -0.139  | 0.0221  | 0.549   | 0.3713  | 0.1751  | -0.2759 | -0.2711 | -0.7149 | -0.6736 |
| PBANKA_083100 | -0.8491 | -2.3028 | -2.566  | -1.8327 | -0.7916 | -0.2824 | 0.522   | 0.6889  | 1.4325  | 1.7686  | 0.8128  | -1.4061 |
| PBANKA_060280 | -0.3292 | 0.423   | 0.0276  | -0.0448 | 0.2512  | -0.169  | -0.0207 | -0.2169 | -0.3856 | -0.6742 | -0.0548 | 0.0796  |
| PBANKA_010650 | 0.0991  | 0.36    | 0.2798  | -0.1235 | 0.392   | -0.6223 | 0.1233  | 0.3418  | -0.3062 | -0.3475 | -0.5613 | -0.4935 |
| PBANKA_134620 | -0.1238 | -0.41   | 0.2411  | 0.3452  | 0.361   | 0.6617  | 0.2541  | -0.2546 | -0.2754 | -0.9216 | -0.7804 | -0.8535 |
| PBANKA_102830 | 0.203   | 0.7922  | 0.1898  | -0.2785 | 0.127   | -0.0666 | -0.4896 | -0.0451 | -0.0406 | 0.0243  | -0.3464 | -0.1877 |
| PBANKA_120570 | -0.1569 | 0.3534  | 0.28    | 0.1897  | 0.1372  | 0.2513  | 0.1134  | 0.2189  | 0.1492  | -0.1112 | -0.5568 | -0.6541 |
| PBANKA_132560 | 0.3385  | 0.5304  | 0.3048  | 0.3783  | 0.1973  | 0.0478  | -0.2414 | -0.541  | -0.9113 | -0.7369 | -0.6624 | -0.7555 |
| PBANKA_091730 | 0.1644  | 0.64    | 0.1182  | 0.1198  | 0.1378  | 0.6231  | 0.0175  | -0.3693 | -0.2157 | -0.0885 | 0.2137  | 0.6975  |
| PBANKA_062010 | 0.1551  | -0.7631 | 0.3709  | -0.2177 | 0.1206  | 0.5206  | 0.2599  | 0.2674  | 0.5723  | 0.3276  | 0.839   | 1.1787  |
| PBANKA_122750 | -0.88   | -0.8977 | -0.3617 | 0.5281  | -0.1093 | -0.4135 | 0.2355  | 0.3646  | 0.5378  | 0.662   | 0.7816  | 0.7805  |
| PBANKA_051870 | 0.1864  | 0.1529  | 0.0692  | 0.2505  | 0.1585  | -0.4316 | -0.441  | -0.0873 | -0.1248 | 0.0492  | 0.6104  | 0.8726  |
| PBANKA_103800 | -0.6078 | -0.6013 | -0.3991 | 0.0778  | 0.0824  | 0.397   | 0.8946  | 0.7425  | 0.5793  | -0.1984 | -1.4264 | -1.9894 |
| PBANKA_146040 | 0.1537  | 0.3106  | 0.4024  | 0.294   | 0.2371  | 0.1739  | 0.0371  | -0.6874 | -1.1875 | -1.4781 | -1.8764 | -2.2873 |
| PBANKA_142460 | -0.3181 | 0.5     | -0.1053 | 0.2108  | -0.2801 | -0.0548 | -0.2686 | -0.1115 | 0.1979  | 0.6726  | 1.2835  | 1.6406  |
| PBANKA_070870 | 0.4185  | 0.1434  | 0.3658  | 0.8584  | 0.2996  | 0.0412  | 0.1392  | -0.1693 | -0.0546 | -0.3656 | -0.3199 | -0.0063 |
| PBANKA_031060 | 0.2231  | 0.5067  | 0.2001  | 0.4992  | 0.1252  | 0.3588  | -0.2467 | -0.2922 | -0.4231 | -0.6354 | -0.3481 | -0.3887 |
| PBANKA_114200 | 0.1726  | -0.6612 | 0.3026  | 0.5427  | 0.2485  | -0.0297 | -0.0714 | -0.4779 | -0.4037 | -0.9541 | -0.7706 | 0.2005  |
| PBANKA_111380 | -0.3597 | -0.4277 | -0.3163 | -0.4312 | 0.0677  | 0.138   | 0.4249  | 0.2671  | 0.0223  | 0.1736  | -0.2245 | -0.0847 |
| PBANKA_124210 | 0.1185  | 0.517   | 0.2262  | -0.4347 | 0.1051  | 0.3243  | -0.1677 | -0.1885 | -0.473  | -0.2068 | 0.3473  | 0.7564  |
| PBANKA_140450 | -0.5981 | -0.2673 | -0.1891 | -0.2785 | -0.0687 | 0.5109  | 0.0767  | 0.5623  | 0.393   | 0.3961  | -0.4473 | 0.1766  |
| PBANKA_083490 | -0.1693 | -0.8355 | -0.1955 | -0.2606 | -0.0776 | -0.9772 | 0.0281  | -0.5275 | -0.2866 | -0.2409 | -0.5272 | -0.7665 |
| PBANKA_134840 | -1.2142 | -0.9505 | -0.5554 | 0.0033  | 0.243   | 0.473   | 0.6858  | 0.1343  | 0.6385  | 0.1775  | -0.5449 | -0.5936 |
| PBANKA_111830 | 0.0175  | 0.4921  | -0.0289 | 0.0047  | 0.1433  | 0.4092  | -0.0179 | 0.3214  | 0.2551  | -0.3374 | 0.1795  | 0.4331  |
| PBANKA_140720 | -0.2641 | 0.4003  | 0.1837  | 0.279   | 0.2351  | 0.0193  | -0.2069 | -0.5813 | -0.0448 | 0.1661  | -0.1887 | -0.4663 |
| PBANKA_103070 | 1.0672  | 0.9438  | 0.1149  | 0.0216  | -0.0005 | 0.2021  | -0.2712 | -0.3581 | -0.0704 | 0.0578  | 0.1712  | 1.9113  |
| PBANKA_061280 | 0.0363  | 0.596   | 0.5976  | 0.0526  | -0.5116 | 0.2348  | -0.5618 | -0.3266 | 0.1217  | -0.0061 | 0.605   | 0.0254  |
| PBANKA_134240 | 0.1402  | 0.4592  | 0.175   | -0.2989 | -0.0411 | -0.0459 | -0.2044 | -0.2722 | -0.0838 | -0.0023 | 1.0363  | 0.839   |
| PBANKA_051120 | 0.0825  | 0.132   | -0.3855 | 0.0444  | -0.3583 | -0.0625 | -0.0224 | 0.1716  | 0.4112  | 0.666   | 0.7102  | 1.082   |
| PBANKA_121880 | 0.1555  | 0.4661  | 0.0484  | -0.4347 | -0.4121 | 0.1824  | -0.1598 | -0.1408 | -0.0658 | 0.0442  | 0.6707  | 0.5751  |
| PBANKA_132650 | 0.2025  | 0.1517  | 0.3486  | 0.9544  | 0.4207  | 0.5698  | -0.003  | -0.0333 | -1.1432 | -0.4591 | -0.4733 | -0.1841 |
| PBANKA_121130 | 0.3977  | 0.2523  | -0.0038 | -0.2171 | 0.1576  | -0.0829 | -0.1827 | -0.2905 | -0.3193 | -0.0951 | -1.0667 | -0.2817 |
| PBANKA_052130 | 0.133   | 0.3701  | 0.0055  | -0.2434 | -0.3725 | -0.1283 | -0.3704 | -0.0919 | 0.3511  | 0.8751  | 1.3376  | 1.6495  |
| PBANKA_111100 | 0.2288  | 0.6081  | -0.0307 | -0.08   | -0.0817 | -0.3071 | -0.1966 | -0.0899 | 0.0297  | 0.1407  | 0.6649  | 0.6871  |
| PBANKA_111720 | -0.2473 | -0.4902 | -0.0404 | 0.2473  | -0.1855 | 0.1607  | 0.3594  | 0.3006  | 0.8116  | 0.9469  | 0.3166  | 0.4718  |
| PBANKA_140060 | -1.6748 | -0.6761 | -1.0349 | -0.9414 | -0.2276 | 0.0047  | 0.4369  | 0.6028  | 0.1532  | 0.2537  | -0.1554 | -0.8172 |
| PBANKA_142670 | 0.2998  | 0.4838  | 0.3889  | 0.3885  | 0.256   | 0.0779  | -0.0868 | -0.0913 | -0.4797 | -0.5556 | -0.4106 | -0.4962 |
| PBANKA_060710 | -0.424  | -0.5539 | -0.0798 | 0.656   | 0.4565  | 0.4588  | 0.0828  | -0.2127 | -0.4623 | -1.2954 | -0.9279 | -1.3621 |
| PBANKA_122240 | 0.0654  | 0.0761  | 0.0978  | 0.2528  | 0.2809  | 0.27    | 0.3966  | -0.0763 | -0.6136 | -0.5457 | -1.0179 | -1.3123 |
| PBANKA_070950 | 0.4232  | 0.2863  | 0.1079  | 0.6436  | 0.3227  | -0.2048 | -0.0843 | -0.1574 | -0.1497 | -0.2018 | -0.3932 | -0.176  |
| PBANKA_124380 | 0.0146  | 0.128   | 0.2964  | 0.3361  | 0.5501  | 0.0754  | 0.0839  | -0.2791 | -0.6117 | -0.669  | -0.6856 | -0.8691 |
| PBANKA_081670 | -0.6092 | -0.3287 | -0.9046 | 0.032   | -0.1534 | 0.0667  | 0.4162  | 0.3317  | 0.2     | 0.4183  | -0.3577 | -0.2131 |
| PBANKA_102520 | 0.456   | 0.2502  | 0.1638  | -0.1823 | 0.1188  | -0.6311 | -0.252  | -0.1234 | -0.8793 | 0.3643  | 0.3373  | 0.5943  |
| PBANKA_090140 | -0.2025 | -0.3376 | 0.0783  | 0.4224  | 0.537   | 0.3849  | 0.3426  | 0.0943  | -0.1904 | -0.5057 | -0.5743 | -1.4194 |
| PBANKA_011210 | -0.6874 | -0.5    | -0.5292 | -0.577  | -0.1734 | 0.1957  | 0.1078  | 0.6763  | 0.6761  | 1.0917  | 0.1229  | -0.183  |
| PBANKA_110500 | 0.3343  | -0.2038 | 0.2299  | 0.1767  | 0.2563  | 0.0509  | -0.2126 | -0.2703 | -0.4975 | -0.7765 | -1.4088 | -2.3647 |
| PBANKA_081470 | 0.0502  | 0.0995  | 0.1874  | 0.1327  | 0.112   | 0.2793  | 0.0536  | -0.1244 | -0.4928 | -0.3573 | -0.446  | -0.524  |
| PBANKA_020910 | -0.5615 | -1.0217 | -0.575  | -0.6191 | -0.2543 | 0.1233  | 0.7345  | 0.8653  | 0.7014  | 0.6807  | 0.4246  | -0.3412 |
| PBANKA_102390 | 0.0814  | 0.6063  | 0.0666  | 0.2014  | 0.0298  | -0.0102 | -0.1658 | -0.1499 | -0.6048 | -0.6763 | -0.9065 | -0.1331 |
| PBANKA_060360 | -0.211  | -0.0734 | 0.3157  | 0.3996  | 0.352   | 0.3922  | -0.2355 | -0.5252 | -0.6773 | -1.3106 | -1.2406 | -1.0418 |
| PBANKA_111000 | 0.3686  | 0.7053  | 0.4268  | 0.2535  | 0.4198  | 0.1692  | -0.3756 | -0.7705 | -0.5335 | -0.7662 | -0.3542 | -0.0757 |

|               |         |         |         |         |         |         |         |         |         |         |         |         |
|---------------|---------|---------|---------|---------|---------|---------|---------|---------|---------|---------|---------|---------|
| PBANKA_060830 | 0.4086  | -0.2375 | -0.0223 | -0.2518 | 0.1319  | 0.3231  | -0.1826 | -0.325  | 0.0782  | 0.0383  | -0.1151 | -0.6332 |
| PBANKA_100980 | -0.0787 | -1.0656 | 0.1783  | -0.645  | 0.8465  | -0.4333 | -0.4983 | -0.5329 | -0.8979 | -0.6451 | -0.3494 | -0.296  |
| PBANKA_010520 | 0.3952  | 0.7028  | 0.2001  | -0.3933 | 0.108   | -0.1428 | 0.1132  | -0.0452 | -0.0804 | 0.2365  | 0.5707  | 0.5571  |
| PBANKA_100570 | 0.2887  | 0.365   | -0.0162 | -0.0315 | 0.0156  | 0.1912  | 0.1328  | 0.3228  | 0.2337  | 0.0568  | 0.132   | 0.1885  |
| PBANKA_100560 | -0.0616 | -0.2312 | -0.5751 | 0.1124  | -0.1011 | -0.017  | -0.1285 | -0.131  | 0.4173  | 0.6345  | 1.1293  | 1.4073  |
| PBANKA_145020 | -1.4085 | -1.6831 | -0.7592 | -0.4784 | 0.0282  | 0.4093  | 0.7754  | 0.6479  | 0.4831  | 0.222   | -1.053  | -0.5613 |
| PBANKA_011110 | -0.138  | 0.6414  | -0.3679 | -0.1825 | -0.3648 | -0.6128 | 0.1666  | 0.3035  | 0.648   | 1.0185  | 0.9251  | 0.9694  |
| PBANKA_134890 | 0.4492  | 0.8298  | 0.4891  | 0.6353  | -0.1131 | 0.7687  | -0.0846 | -0.7342 | -0.2722 | -0.4365 | 0.6135  | -0.8964 |
| PBANKA_134910 | -2.5432 | -1.3389 | -2.76   | -1.4976 | -0.748  | -0.349  | 0.1935  | 0.8499  | 1.1631  | 1.3604  | 1.1547  | 0.3296  |
| PBANKA_101850 | 0.3513  | 0.0443  | 0.426   | 0.5764  | 0.3687  | 0.3633  | -0.1837 | -0.2496 | -0.0519 | -0.5496 | -0.297  | -0.5914 |
| PBANKA_133070 | -1.5463 | -0.4543 | 0.3586  | 0.5077  | 0.4802  | 0.8008  | 0.0618  | -0.0654 | -0.4681 | -0.8662 | -0.9432 | -1.0383 |
| PBANKA_083260 | 0.2526  | -0.7567 | -0.0995 | 0.185   | 0.5591  | 0.9844  | 0.2774  | -0.1398 | -0.6929 | -0.8569 | -1.6891 | -1.1332 |
| PBANKA_092770 | 0.2432  | 0.6267  | 0.0889  | -0.1256 | -0.1013 | 0.1762  | -0.3068 | -0.4166 | -0.1726 | 0.1875  | 0.2291  | 0.8088  |
| PBANKA_102890 | -0.0975 | 0.3661  | 0.2685  | 0.2807  | 0.8303  | 0.4312  | 0.1803  | -0.2    | -0.184  | -0.6089 | -0.317  | 0.3874  |
| PBANKA_123870 | 0.3232  | 0.1413  | 0.419   | 0.5079  | 0.4145  | 0.0063  | -0.3143 | -0.4033 | -1.0961 | -1.3134 | -0.8569 | -0.6894 |
| PBANKA_130990 | 0.0957  | 0.5355  | 0.5592  | 0.2383  | 0.0392  | 0.2908  | -0.0834 | -0.5027 | -0.9157 | -1.0991 | -0.9714 | -0.9744 |
| PBANKA_134950 | 0.1524  | 0.4179  | 0.1906  | 0.114   | 0.1955  | -0.0953 | -0.2809 | -0.2915 | -0.4564 | -0.0379 | 0.0433  | 0.1721  |
| PBANKA_131000 | 0.2107  | 0.4118  | -0.1036 | 0.2857  | -0.0291 | -0.1109 | -0.1684 | 0.3713  | 0.3805  | 0.5034  | 0.8296  | -0.0463 |
| PBANKA_141850 | -0.3043 | -0.3767 | 0.3043  | -0.0926 | 0.3759  | 0.1896  | -0.0645 | -0.2169 | -0.6353 | -0.2319 | -0.5357 | 0.2661  |
| PBANKA_144990 | -1.4595 | -0.4164 | -0.3543 | -1.0125 | -1.2354 | -1.6456 | -0.3771 | -1.5529 | -1.5827 | -1.1639 | -0.054  | -0.8404 |
| PBANKA_060370 | 0.2836  | 0.1248  | -0.1209 | 0.6993  | 0.0454  | 0.1399  | 0.1358  | 0.2432  | 0.216   | 0.0878  | 0.0716  | -0.0363 |
| PBANKA_060500 | 0.1556  | 0.0088  | -0.3492 | 0.1615  | -0.3153 | 0.1567  | 0.308   | 0.3342  | -0.0003 | 0.2009  | -0.0202 | -0.9921 |
| PBANKA_113620 | -0.7068 | -0.7712 | -0.4549 | -0.1568 | 0.1355  | -0.3887 | -0.1984 | -0.1772 | -0.4376 | -0.8211 | -1.2282 | -1.3736 |
| PBANKA_103120 | -0.3606 | 0.7322  | -0.3464 | -0.3498 | -0.1294 | -1.0411 | -0.3247 | -0.317  | -0.4033 | -0.2694 | -0.6054 | -0.7395 |
| PBANKA_113700 | 0.3536  | 0.7876  | 0.5585  | 0.031   | -0.0647 | -0.1784 | 0.1883  | 0.1153  | -0.2344 | -0.5021 | -0.1931 | -0.7503 |
| PBANKA_103940 | 0.3417  | 0.7313  | 0.3094  | 0.2178  | -0.004  | -0.261  | -0.2472 | -0.5699 | -0.8512 | -1.2114 | -0.197  | -0.157  |
| PBANKA_102120 | -0.7925 | -0.3952 | -0.6745 | -0.4949 | -0.5107 | -0.4627 | -0.0543 | 0.0056  | 0.3684  | 0.7381  | 0.7597  | 0.3717  |
| PBANKA_143650 | -0.5896 | -0.3095 | -0.5177 | -0.3849 | -0.2091 | 0.4758  | 0.287   | 0.6061  | 0.8173  | 0.9591  | 0.7942  | 0.2954  |
| PBANKA_131100 | 0.2349  | 0.073   | 0.0634  | -0.2247 | -0.0407 | -0.228  | 0.0388  | 0.0554  | 0.0022  | 0.0398  | -0.1079 | 0.1431  |
| PBANKA_121680 | -0.0942 | -0.1671 | -0.5135 | -0.1726 | -0.0045 | 0.0179  | 0.0802  | 0.108   | 0.218   | 0.4277  | -0.1448 | -0.507  |
| PBANKA_130540 | 0.1725  | -0.0424 | 0.0662  | -0.1193 | -0.0905 | 0.5801  | 0.1176  | 0.0039  | 0.2047  | 0.3683  | 0.2444  | -0.2974 |
| PBANKA_131380 | 0.3699  | 0.4718  | 0.06    | -0.0211 | -0.1025 | -0.6983 | -0.1573 | 0.1492  | -0.7702 | -0.2073 | -0.1073 | -0.0094 |
| PBANKA_124090 | 0.5726  | 0.3967  | 0.6605  | 0.6866  | 0.5366  | 0.6624  | -0.0168 | -0.2826 | -0.2119 | -0.8237 | -0.5704 | 0.3519  |
| PBANKA_021450 | -0.1654 | -0.1611 | -0.4039 | -0.5642 | -0.5436 | -0.0882 | 0.2521  | 0.5935  | 0.8086  | 0.9919  | 0.0763  | 0.1542  |
| PBANKA_082780 | -0.7714 | -1.3225 | -0.2078 | 0.4314  | 0.0329  | 0.4371  | 0.3265  | 0.3184  | 0.5293  | 0.182   | 0.1429  | -0.8294 |
| PBANKA_144410 | 0.5203  | 1.237   | 0.2538  | -0.002  | 0.2647  | 0.4672  | -0.3236 | -1.0318 | -0.6415 | -0.8885 | -0.6448 | -1.2174 |
| PBANKA_093700 | -0.1563 | 0.0157  | 0.168   | 0.3305  | 0.4188  | -0.0135 | -0.0385 | -0.3478 | -0.69   | -1.0354 | -0.9663 | -1.2712 |
| PBANKA_140170 | 0.0277  | 0.1114  | 0.4717  | 0.3416  | 0.3026  | -0.0223 | 0.0788  | 0.0857  | -0.4473 | -0.5421 | -0.8074 | -0.8147 |
| PBANKA_113940 | 0.1058  | 0.534   | 0.3924  | -0.0316 | -0.067  | 0.7476  | -0.1786 | -0.1977 | -0.3557 | -0.1746 | -0.208  | 0.111   |
| PBANKA_101150 | -0.1341 | -0.1609 | 0.2875  | -0.4054 | -0.0145 | 0.6242  | 0.1879  | 0.4317  | 0.6672  | 0.4135  | 0.0961  | -0.5207 |
| PBANKA_041650 | 0.0109  | 0.2713  | 0.2181  | 0.0899  | -0.0306 | 0.426   | 0.0655  | -0.2346 | -0.1341 | -0.2328 | -0.3546 | -0.6026 |
| PBANKA_061550 | 0.3308  | 0.0269  | 0.1059  | 0.3583  | -0.5292 | 0.648   | 0.2072  | 0.1365  | -0.2146 | 0.0086  | 0.0415  | 0.0129  |
| PBANKA_130820 | -0.2782 | -0.5735 | -0.0234 | 0.132   | 0.6443  | 0.2825  | 0.404   | -0.0297 | -0.1944 | -0.5025 | -0.9124 | -1.2528 |
| PBANKA_122600 | 0.4654  | 0.7833  | 0.0328  | 0.3837  | -0.4213 | 0.1913  | 0.0636  | -0.1514 | 0.0224  | -0.0539 | 0.5395  | 0.2192  |
| PBANKA_134400 | 0.7382  | 0.7252  | 0.3689  | 0.1712  | 0.228   | 0.1014  | -0.234  | -0.2203 | -0.3748 | -0.4132 | 0.1324  | 0.0486  |
| PBANKA_061000 | -0.1859 | 0.5302  | 0.2688  | 0.1763  | -0.0049 | 0.4953  | -0.3932 | -0.4001 | -0.1608 | -0.3655 | -0.7745 | 0.0969  |
| PBANKA_040580 | -0.4772 | -0.5449 | -0.4203 | 0.1317  | 0.022   | 0.254   | 0.4873  | 0.4554  | 0.4956  | 0.1732  | -0.4158 | -0.6033 |
| PBANKA_140690 | 0.2169  | -0.2884 | -0.2143 | -0.0196 | 0.2099  | 0.6721  | -0.0952 | -0.0258 | -0.1463 | 0.0465  | 0.1938  | -0.7854 |
| PBANKA_144920 | -0.1886 | -0.3493 | -0.1658 | -0.2343 | -0.0425 | 0.903   | 0.2014  | 0.0325  | -0.0308 | 0.0051  | -0.7392 | 0.0194  |
| PBANKA_041800 | 0.4189  | 1.1707  | 0.3555  | 0.0153  | 0.0564  | -0.1523 | -0.6603 | -0.925  | -0.6457 | -0.5975 | 0.4494  | 0.411   |
| PBANKA_122210 | 0.2701  | 0.3191  | 0.0115  | 0.1861  | -0.0228 | -0.2529 | 0.1165  | 0.5049  | 0.4132  | 0.4904  | 0.3399  | 0.0134  |
| PBANKA_143020 | 0.3424  | -0.0115 | 0.2672  | 0.2555  | 0.2676  | -0.4508 | -0.0791 | 0.1286  | -0.0584 | -0.5911 | -0.5568 | -0.3143 |
| PBANKA_081080 | -0.4878 | -0.0147 | -0.4344 | 0.1664  | -0.0825 | 0.342   | 0.2812  | 0.1244  | 0.2221  | 0.3577  | 0.2062  | 0.2111  |
| PBANKA_130500 | 0.9119  | -0.2941 | -0.0938 | 0.2699  | 0.8355  | 0       | -0.6849 | -0.5761 | -0.4689 | -0.3825 | 0       | -0.3825 |
| PBANKA_071500 | 0.0082  | 0.0313  | -0.2012 | 0.2287  | 0.0794  | -0.0636 | -0.0581 | 0.1629  | 0.522   | 0.6383  | -0.0367 | -0.4419 |
| PBANKA_140880 | 0.3433  | 0.3445  | 0.1101  | 0.7265  | 0.2777  | 0.3243  | 0.0769  | -0.118  | 0.0352  | -0.1698 | -0.609  | 0.5964  |
| PBANKA_135070 | 0.1145  | 0.1983  | -0.0312 | -0.029  | -0.1134 | -0.7331 | -0.1052 | -0.235  | -0.4051 | -0.3011 | -0.0389 | -0.3575 |
| PBANKA_135930 | 0.3967  | 0.3835  | 0.4035  | 0.1575  | 0.2302  | -0.5169 | -0.2025 | -0.4199 | -0.5771 | -0.8171 | -1.0191 | -1.0756 |
| PBANKA_141330 | 0.2139  | -0.3664 | -0.0226 | 0.1904  | 0.1668  | -0.5498 | -0.4336 | -0.2298 | 0.2898  | 0.1659  | 0.1249  | 0.7025  |
| PBANKA_080950 | -0.9787 | -0.9305 | -0.6696 | -1.3838 | -0.4611 | -2.3176 | -0.2767 | -1.1778 | -0.5286 | -0.4882 | -0.8934 | -0.6228 |
| PBANKA_120720 | -0.0071 | -0.3684 | 0.0886  | -0.0201 | 0.4303  | 0.1879  | 0.2975  | -0.1634 | -0.4534 | -0.4602 | -1.109  | -0.7083 |
| PBANKA_145590 | 0.217   | -0.3133 | 0.3073  | 0.229   | 0.482   | 0.7459  | 0.3323  | -0.0886 | 0.0703  | -0.2071 | -0.6193 | -0.3043 |
| PBANKA_092030 | -0.0824 | -0.3872 | 0.2216  | 0.198   | 0.3955  | 0.1803  | -0.1723 | 0.1112  | -0.1767 | -0.4927 | -0.6028 | -0.4938 |

|               |         |         |         |         |         |         |         |         |         |         |         |         |
|---------------|---------|---------|---------|---------|---------|---------|---------|---------|---------|---------|---------|---------|
| PBANKA_131850 | -0.9113 | -0.6429 | -1.1114 | -0.2316 | -0.3897 | -0.8733 | -0.9189 | -0.832  | 0.2217  | 0.2855  | 1.2846  | 1.6854  |
| PBANKA_061880 | 0.1093  | -0.3125 | -0.2784 | 0.2861  | -0.026  | -0.1425 | -0.2841 | -0.0567 | 0.2336  | 0.3217  | 0.5539  | 0.8186  |
| PBANKA_131990 | -0.0704 | 1.1888  | 0.1589  | -0.1618 | 0.2748  | -0.6863 | -1.0508 | -1.263  | -1.8317 | -1.7324 | -0.923  | -1.037  |
| PBANKA_130770 | 0.308   | -0.4618 | -0.1319 | 0.0286  | 0.2384  | 0.032   | 0.0477  | -0.3455 | 0.0874  | -0.0427 | -1.0693 | -0.2855 |
| PBANKA_110130 | -0.5049 | 0.0847  | -0.8059 | -0.8093 | -0.9763 | -0.77   | -0.7176 | -0.3331 | 0.3717  | 0.6527  | 1.5098  | 2.0552  |
| PBANKA_134730 | 0.1703  | 0.4046  | -0.0044 | -0.1744 | -0.0188 | -0.4974 | -0.0257 | 0.1933  | -0.4059 | -0.3778 | -0.9443 | -0.0414 |
| PBANKA_102580 | 0.3194  | 0.0692  | 0.352   | 0.4686  | 0.3633  | 0.1684  | -0.3906 | -0.9017 | -1.1543 | -1.5365 | -0.8275 | -1.1623 |
| PBANKA_092700 | -0.383  | -0.0248 | -0.0714 | 0.1353  | 0.1026  | 0.021   | 0.1935  | 0.1982  | 0.4859  | 0.1611  | -0.0939 | -0.1073 |
| PBANKA_100850 | 0.1583  | 0.7648  | -0.2132 | -0.4509 | -0.8022 | -0.8394 | -0.8847 | -0.479  | 0.1728  | 1.1635  | -0.0439 | 1.1612  |
| PBANKA_143690 | 0.2782  | 0.9898  | 0.3118  | 0.1526  | 0.2684  | -0.2277 | 0.0741  | 0.0796  | -0.1648 | -0.1188 | -0.3533 | -0.0438 |
| PBANKA_092630 | 0.7152  | 0.3457  | 0.5127  | 0.6115  | 0.5248  | 0.3286  | -0.0689 | -0.1832 | -0.113  | -0.4797 | -0.2365 | 0.1269  |
| PBANKA_112740 | 0.2655  | 0.2369  | 0.529   | 0.0742  | 0.2228  | 0.5189  | -0.3051 | -0.7152 | -0.1465 | -0.7055 | -0.4927 | -0.3623 |
| PBANKA_141580 | 0.3584  | 0.1505  | 0.4121  | 0.1655  | 0.2632  | -0.0154 | -0.1712 | -0.5343 | -1.1307 | -1.8496 | -1.5944 | -1.3522 |
| PBANKA_082180 | 0.3332  | -0.121  | 0.4074  | 0.5977  | 0.3697  | 0.1747  | -0.2789 | -0.3509 | -1.144  | -1.1948 | -0.9067 | -0.9637 |
| PBANKA_113370 | 0.107   | 0.2065  | -0.2411 | 0.503   | 0.0046  | 0.2449  | -0.0218 | -0.4604 | -0.1804 | -0.1606 | -0.3556 | -0.5857 |
| PBANKA_123550 | 0.5222  | 0.5195  | 0.2783  | 1.1512  | 0.3072  | 0.2911  | -0.0424 | 0.0775  | -0.453  | -0.293  | -0.0677 | -0.5932 |
| PBANKA_083210 | 0.0352  | -0.9815 | -0.1159 | 0.6701  | 0.465   | -0.644  | 0.6209  | 0.3065  | 0.3749  | 0.2988  | -0.2052 | 0.2057  |
| PBANKA_081060 | 0.4029  | -1.0524 | 0.2265  | 0.5882  | -0.024  | 0.2259  | -0.0461 | -0.2918 | 0.3912  | -0.1095 | 0.5532  | 0.3921  |
| PBANKA_090230 | 0.1555  | 0.6609  | 0.0024  | -0.4854 | -0.4442 | -0.33   | -0.2157 | 0.4555  | 0.513   | 0.5023  | 1.3167  | 1.0669  |
| PBANKA_082120 | -0.2364 | -0.7994 | -0.4716 | 0.695   | 0.2544  | 0.1537  | 0.002   | 0.0096  | 0.6127  | 0.2146  | 0.6099  | 1.2569  |
| PBANKA_092680 | 0.0443  | 0.7307  | 0.2326  | 0.0772  | 0.1929  | -0.0894 | -0.1124 | -0.6687 | -0.344  | -0.2819 | -0.3405 | -0.2647 |
| PBANKA_103270 | -0.2855 | 0.44    | -0.0476 | -0.3255 | -0.2867 | -0.34   | -0.637  | -0.6526 | -0.5987 | -0.4835 | 0.2956  | 0.1856  |
| PBANKA_050260 | 0.0034  | 0.0648  | -0.1422 | 0.1335  | 0.2975  | 0.0825  | 0.4652  | 0.5058  | 0.124   | 0.0667  | -0.7217 | -1.2305 |
| PBANKA_082330 | 0.0435  | 0.5584  | 0.031   | 0.4962  | 0.2331  | 0.3098  | 0.0585  | -0.4159 | -0.5513 | -0.4233 | -0.4487 | 0.0711  |
| PBANKA_061400 | -0.2551 | 0.3113  | -0.09   | 0.3761  | 0.1663  | 0.3254  | 0.1021  | -0.0438 | -0.4195 | -0.2179 | -1.1885 | -0.8097 |
| PBANKA_120990 | 0.5964  | 0.1479  | 0.223   | -0.3525 | -0.678  | 0.0933  | -0.5315 | -0.0351 | 0.4961  | 0.8683  | 0.6537  | 1.1699  |
| PBANKA_070670 | 0.7112  | 0.1671  | -0.446  | -0.1992 | -0.2684 | -0.0767 | 0.0042  | -0.3643 | -0.1542 | 0.3268  | 0.573   | 1.2181  |
| PBANKA_061250 | -0.0671 | -0.7625 | -0.0908 | 0.8437  | 0.5064  | 0.8768  | 0.3185  | -0.228  | -0.6031 | -1.161  | -0.9472 | -0.925  |
| PBANKA_114020 | -0.0175 | 0.2444  | -0.4853 | -0.7198 | -0.12   | 0.1448  | -0.1179 | -0.1718 | -0.1556 | 0.1341  | 0.2205  | -0.9933 |
| PBANKA_090630 | 0.3737  | 0.25    | 0.3453  | 0.5314  | 0.0114  | 0.4693  | 0.1546  | -0.1345 | -0.295  | -0.4733 | -0.6682 | -0.7405 |
| PBANKA_133630 | -0.3437 | 0.0955  | 0.1364  | 0.3682  | 0.3864  | 0.8642  | 0.3668  | 0.0999  | 0.6246  | 0.0999  | -0.2971 | -0.3673 |
| PBANKA_145710 | -0.088  | -0.0342 | -0.0363 | -0.0669 | -0.0129 | 0.4234  | 0.1979  | 0.0355  | 0.1094  | 0.3752  | 0.2883  | -0.0316 |
| PBANKA_093020 | -0.2061 | -1.0489 | 0.0221  | -0.0957 | -0.0449 | -0.144  | 0.102   | 0.2546  | 0.3956  | -0.1523 | -0.8167 | -0.16   |
| PBANKA_020580 | 0.086   | 0.7638  | -0.0903 | -0.1419 | -0.0789 | 0.1677  | 0.0796  | 0.4096  | 0.3858  | 0.46    | 1.112   | 0.6568  |
| PBANKA_081440 | 0.1874  | -1.0121 | 0.0639  | 0.624   | 0.5065  | 0.1525  | 0.1474  | -0.2181 | -0.4137 | -1.102  | -1.4525 | -1.3231 |
| PBANKA_030910 | 0.4139  | 0.3405  | -0.2156 | 0.1664  | -0.0622 | -0.3127 | -0.3446 | -0.3151 | -0.2624 | -0.5079 | 0.7892  | 0.7217  |
| PBANKA_110920 | 0.2347  | 0.1869  | 0.8634  | 0.498   | 0.1134  | 0.7522  | 0.0931  | 0.1057  | -0.3705 | -0.4683 | -0.4197 | -0.377  |
| PBANKA_051310 | 0.18    | 0.0922  | 0.2704  | 0.0969  | 0.1635  | 0.4295  | 0.179   | -0.0674 | -0.1814 | 0.0525  | -0.0421 | -0.614  |
| PBANKA_113030 | 0.2821  | -0.3413 | 0.2711  | 0.7242  | 0.5066  | 0.2818  | -0.13   | -0.6593 | -0.5755 | -1.0513 | -0.8717 | -0.441  |
| PBANKA_090620 | 0.2328  | -0.5707 | 0.2226  | 0.0345  | 0.528   | 0.7602  | 0.2404  | -0.1472 | -0.4358 | -1.0816 | -1.4722 | -1.1917 |
| PBANKA_145440 | 0.0469  | -0.2003 | 0.3055  | 0.4245  | 0.3478  | 0.1236  | 0.0095  | -0.1795 | -0.2031 | -0.4521 | -0.2918 | -0.0511 |
| PBANKA_134820 | 0.4108  | 0.359   | 0.896   | 0.5284  | 0.3868  | 0.3333  | 0.0886  | 0.2849  | -0.281  | -0.5243 | -0.8712 | -1.2944 |
| PBANKA_061620 | 0.084   | -0.1917 | -0.1594 | -0.2516 | -0.2355 | 0.0441  | 0.3132  | 0.8965  | 0.7346  | 0.8466  | -0.1157 | -0.366  |
| PBANKA_030410 | 0.0685  | 0.2057  | 0.2033  | 0.042   | 0.0638  | -1.0032 | 0.1926  | -0.1348 | 0.1389  | 0.3418  | 0.7653  | 0.1665  |
| PBANKA_030230 | -0.6899 | -0.2241 | -0.5343 | -0.2256 | -0.0689 | 0.3047  | 0.1846  | 0.2762  | -0.0798 | -0.0368 | -0.3861 | -0.025  |
| PBANKA_120470 | 0.508   | -0.1449 | 0.249   | 0.4335  | 0.4639  | 0.7352  | 0.1716  | -0.0974 | -0.1077 | -0.7457 | -0.5744 | -0.7743 |
| PBANKA_135680 | -0.152  | 0.058   | -0.1612 | -0.1554 | 0.0849  | 0.1456  | 0.1448  | 0.5475  | 0.768   | 0.7446  | 0.057   | -0.0292 |
| PBANKA_133870 | -0.1256 | -0.0362 | -0.2454 | -0.0831 | -0.052  | 0.3438  | 0.0091  | 0.2286  | 0.3218  | 0.345   | 0.2507  | 0.5236  |
| PBANKA_120920 | 0.1322  | 0.8738  | 0.3359  | 0.5055  | 0.1392  | 0.1759  | -0.0488 | -0.2421 | -0.4719 | -0.5646 | -0.5616 | -0.3679 |
| PBANKA_102210 | 0.3452  | 0.9223  | 0.1669  | 0.01    | -0.0412 | 0.1497  | 0.0559  | -0.1305 | 0.0367  | 0.1487  | -0.1171 | 0.4502  |
| PBANKA_092190 | 0.3763  | -0.412  | 0.1294  | 0.1874  | 0.2907  | -0.3634 | -0.2069 | -0.1797 | -0.1714 | -0.3317 | 0.2672  | 1.5661  |
| PBANKA_131230 | -0.1459 | -0.0322 | -0.0198 | -0.3596 | -0.0426 | 0.1324  | 0.4347  | 0.5302  | 0.2868  | 0.3349  | -0.5321 | -0.2904 |
| PBANKA_114600 | 0.5598  | 0.4619  | 0.1668  | 0.2008  | 0.1815  | 0.1115  | 0.078   | -0.3272 | -0.4302 | -0.5273 | -0.5357 | -0.0105 |
| PBANKA_135660 | -0.3427 | 0.0537  | 0.0454  | 0.4923  | 0.0185  | 1.4788  | 0.221   | 0.1258  | -0.2657 | -0.4975 | -0.5486 | 0.0192  |
| PBANKA_100420 | -0.1789 | -0.883  | 0.2686  | 0.4118  | 0.4492  | 0.3965  | -0.3301 | -0.196  | -0.1717 | -0.4726 | -0.3944 | -0.0357 |
| PBANKA_083110 | 0.5155  | 0.5483  | 0.5686  | 0.1741  | 0.04    | -0.1158 | -0.1862 | 0.0748  | -0.0357 | -0.0677 | 0.0535  | -0.2526 |
| PBANKA_110080 | 0.3823  | 1.1725  | 0.5757  | 0.6859  | 0.3535  | 0.744   | -0.102  | -0.3516 | -0.6675 | -0.6681 | -0.6067 | -0.0512 |
| PBANKA_134350 | -1.5567 | -0.9553 | -1.6544 | -0.7346 | -1.0698 | -0.0914 | 0.3863  | 0.9687  | 1.2047  | 1.4766  | 0.536   | 0.3554  |
| PBANKA_122420 | -0.1213 | 0.8102  | -0.062  | -0.3678 | -0.2437 | -0.0028 | -0.2477 | -0.1811 | -0.0128 | 0.5213  | 1.3558  | 0.7079  |
| PBANKA_061240 | -0.4542 | -0.2498 | -0.2485 | -0.7236 | -0.1105 | 0.384   | -0.1624 | 0.3076  | 0.479   | 0.7332  | 1.3757  | 1.1393  |
| PBANKA_010460 | -0.0875 | -0.1375 | 0.0044  | -0.5045 | -0.0016 | -0.3228 | 0.1214  | -0.1941 | 0.1692  | 0.0568  | -0.148  | -0.5401 |
| PBANKA_090190 | -0.1054 | -0.3634 | -0.0623 | -0.0638 | 0.0491  | -0.1181 | -0.3105 | 0.0434  | 0.2171  | 0.4112  | 0.5253  | 0.5796  |
| PBANKA_102110 | -0.3219 | -0.1613 | -0.4918 | -0.4164 | -0.3366 | 0.102   | 0.5348  | 0.6808  | 0.6523  | 0.8642  | 0.6864  | 1.5812  |

|               |         |         |         |         |         |         |         |         |         |         |         |         |
|---------------|---------|---------|---------|---------|---------|---------|---------|---------|---------|---------|---------|---------|
| PBANKA_100070 | 0.1091  | -0.3587 | -0.0262 | 0.0668  | 0.0047  | 0.0901  | 0.0688  | -0.1861 | -0.2801 | -0.214  | -0.2184 | -0.1869 |
| PBANKA_021490 | -0.0323 | 0.4104  | -0.0231 | -0.1308 | 0.0882  | -0.7934 | -0.2653 | -0.0895 | 0.1335  | 0.437   | 1.1461  | 1.2779  |
| PBANKA_030170 | -0.075  | -0.6567 | 0.0472  | 0.2493  | 0.1316  | 0.0446  | -0.1562 | -0.5588 | -0.2159 | -0.0263 | -0.2219 | -0.0593 |
| PBANKA_110490 | 0.2468  | 0.8864  | 0.1766  | 0.4762  | 0.1378  | 0.2735  | -0.2193 | -0.5326 | -0.327  | -0.4773 | -0.573  | -0.148  |
| PBANKA_131690 | -0.1505 | 0.2528  | 0.0846  | 0.1183  | 0.19    | 0.2162  | 0.1476  | 0.2463  | 0.1117  | 0.1377  | -0.2305 | -0.0453 |
| PBANKA_111740 | 0.4449  | 0.116   | 0.4159  | 0.2783  | 0.4333  | -0.4587 | 0.0935  | -0.4879 | -0.9596 | -1.545  | -1.6326 | -1.9116 |
| PBANKA_114070 | 0.1967  | 0.1355  | 0.0186  | 0.0391  | 0.0302  | -0.3684 | -0.1432 | 0.0731  | -0.5447 | -0.1938 | -0.4258 | -0.3609 |
| PBANKA_121180 | -0.1302 | -0.2501 | 0.2858  | 0.1478  | 0.286   | 0.0941  | 0.2695  | 0.2228  | 0.3684  | 0.165   | -0.2938 | 0.0493  |
| PBANKA_091420 | -0.1966 | -0.3836 | -0.5469 | -0.5299 | -0.4369 | -0.5207 | -0.2573 | -0.0249 | 0.6708  | 0.7818  | 0.994   | 1.4152  |
| PBANKA_091480 | 0.2959  | 0.6402  | 0.2013  | 0.1962  | 0.3006  | 0.3725  | -0.025  | -0.4043 | -0.4885 | -0.4766 | -0.7771 | -0.197  |
| PBANKA_101670 | -0.6966 | -0.6387 | -0.1264 | 0.1836  | 0.1973  | 0.5014  | 0.7889  | 0.2914  | -0.1702 | -0.3979 | -1.4085 | -1.1695 |
| PBANKA_144540 | 0.123   | 0.1665  | 0.2695  | -0.5907 | -0.2492 | -0.523  | -0.3814 | -0.5444 | -0.9397 | -0.2512 | 0.6886  | 0.9358  |
| PBANKA_134860 | -0.1504 | -0.5201 | 0.1986  | 0.2216  | -0.1228 | 0.74    | 0.2551  | 0.2576  | 0.3688  | 0.2124  | -0.5966 | -0.192  |
| PBANKA_082070 | -0.062  | 0.0913  | 0.4903  | -0.1489 | -0.078  | 0.6104  | -0.109  | 0.2214  | 0.3238  | 0.2193  | 0.3879  | 0.4255  |
| PBANKA_133150 | -0.122  | -0.3198 | 0.0694  | 0.0233  | 0.0327  | 0.1865  | 0.1983  | -0.351  | -0.2376 | -0.6361 | -0.4979 | -0.6465 |
| PBANKA_140780 | -0.0097 | -1.118  | 0.2041  | -0.0139 | 0.2652  | 0.1244  | 0.1176  | 0.1653  | 0.4216  | 0.0507  | 0.5869  | 0.9881  |
| PBANKA_090720 | -0.9308 | -0.6757 | -0.8074 | -0.3087 | -0.2694 | 0.2519  | 0.6659  | 0.7462  | 0.5913  | 0.9876  | -0.3029 | -0.2336 |
| PBANKA_133800 | -0.3517 | -0.0622 | 0.0323  | 0.4539  | 0.1707  | 0.2739  | 0.1134  | -0.3325 | -0.4045 | -1.1851 | -1.2625 | -0.7183 |
| PBANKA_080570 | -0.1465 | 0.3668  | 0.4548  | 0.1868  | 0.4452  | -0.0536 | -0.356  | -0.7683 | -1.2788 | -1.6415 | -1.1253 | -1.3005 |
| PBANKA_136320 | -0.1854 | -0.4857 | 0.1468  | 0.2514  | -0.092  | 0.7973  | 0.1968  | 0.3118  | 0.6087  | 0.2573  | 0.0793  | 0.8221  |
| PBANKA_010260 | -0.2635 | -0.123  | -0.0708 | 0.0582  | 0.098   | 0.4354  | 0.1323  | 0.3143  | 0.159   | 0.1442  | 0.169   | -0.2169 |
| PBANKA_135980 | -0.2668 | -0.3383 | -0.2445 | 0.2757  | -0.0182 | 0.0444  | 0.4016  | 0.0487  | 0.1781  | 0.3749  | 0.0948  | 0.351   |
| PBANKA_061220 | -0.4871 | -0.3016 | -0.2268 | -0.4427 | 0.0006  | 0.383   | 0.0372  | 0.402   | 0.4637  | 0.7683  | 0.0416  | -0.202  |
| PBANKA_011180 | 0.059   | 0.2897  | 0.1948  | 0.4238  | 0.4556  | 0.3635  | -0.0981 | -0.0472 | -0.0644 | -0.1733 | 0.1596  | -0.3473 |
| PBANKA_082680 | 0.2715  | -0.5364 | 0.0781  | 0.3412  | 0.0636  | 0.2545  | 0.0251  | -0.1539 | 0.1223  | -0.0346 | -0.1441 | -0.2301 |
| PBANKA_030430 | -0.1137 | -0.5745 | -0.0369 | 0.0232  | 0.0568  | -0.2027 | -0.2005 | -0.4452 | -0.2188 | 0.0445  | 0.7737  | 1.724   |
| PBANKA_082160 | 0.0531  | -0.0299 | 0.0664  | 0.3809  | 0.0033  | 0.722   | 0.1248  | 0.2187  | 0.4707  | 0.0034  | -0.3122 | 0.0685  |
| PBANKA_143700 | 0.0523  | 0.0114  | 0.0935  | -0.0701 | 0.4438  | 0.1343  | 0.4444  | 0.4784  | 0.2693  | -0.2025 | -0.7004 | -0.8717 |
| PBANKA_133460 | 0.3612  | 0.2099  | -0.2585 | -0.1385 | -0.1908 | -0.4709 | -0.188  | -0.0081 | 0.265   | 0.4018  | 0.2606  | 0.3165  |
| PBANKA_114590 | 0.5242  | 0.814   | 0.3021  | -0.1882 | 0.0617  | -0.2402 | -0.6658 | -0.632  | -0.3624 | -0.1303 | 0.2768  | 1.0044  |
| PBANKA_113480 | 0.4511  | 0.324   | -0.1092 | 0.3462  | -0.4331 | -0.1952 | -0.5423 | -0.5583 | -0.3857 | -0.3675 | 0.7529  | 0.9915  |
| PBANKA_122300 | 0.4176  | 0.4941  | 0.3355  | -0.511  | 0.2031  | -0.0557 | -0.5053 | -0.3287 | -0.8479 | -0.0115 | -0.5634 | -0.3444 |
| PBANKA_123760 | 0.0136  | -0.2596 | 0.1269  | 0.0261  | 0.1927  | 0.3863  | 0.0883  | 0.1872  | 0.2777  | 0.2873  | 0.7046  | 0.5918  |
| PBANKA_100250 | -0.3145 | -0.2346 | -0.2429 | 0.0108  | 0.0162  | -0.1836 | 0.2945  | 0.1764  | 0.6329  | 0.4593  | 0.2548  | 0.3952  |
| PBANKA_102980 | -0.3616 | 0.1498  | -0.0734 | 0.3547  | -0.0077 | 0.1686  | -0.5641 | -0.4532 | -0.8318 | -0.7552 | -0.6165 | -0.9241 |
| PBANKA_145730 | 0.455   | 0.2073  | 0.0832  | -0.0956 | 0.047   | -0.2088 | -0.3146 | -0.7367 | -1.4888 | -1.0011 | -0.7344 | -0.2058 |
| PBANKA_051990 | -0.1426 | 0.9747  | 0.0353  | -0.4413 | -0.1828 | -0.3337 | -0.5554 | -0.2971 | -0.5074 | -0.0329 | 0.8285  | 0.52    |
| PBANKA_071440 | 0.1114  | -0.3055 | -0.2349 | -0.615  | -0.1093 | -0.566  | -0.5285 | -0.8903 | -1.3453 | -1.0745 | -1.2488 | -1.3003 |
| PBANKA_136240 | -0.8923 | -0.9457 | -0.5436 | -0.3269 | -0.2992 | 0.2814  | 0.5959  | 0.6023  | 0.4482  | 0.4698  | -0.8227 | -0.6626 |
| PBANKA_051290 | -0.7148 | -0.2821 | -0.2894 | -0.2703 | 0.1111  | 0.0228  | -0.013  | -0.011  | -0.1119 | -0.1129 | -0.1801 | -0.5483 |
| PBANKA_103180 | -0.5839 | 0.7484  | -0.0393 | 0.335   | -0.0829 | 0.4814  | 0.1884  | -0.1729 | -0.4508 | -0.1823 | -0.3887 | -0.3223 |
| PBANKA_144810 | 0.0568  | 0.2593  | 0.1805  | 0.0411  | 0.2479  | 0.1474  | -0.5322 | -0.2027 | -0.6226 | -0.7146 | -0.4803 | -0.1855 |
| PBANKA_124580 | 0.4519  | 0.3349  | 0.018   | -0.1156 | 0.0023  | -0.1017 | -0.3596 | 0.0425  | 0.0444  | 0.4416  | 0.5426  | 0.6178  |
| PBANKA_121360 | 0.0829  | 0       | 0.4405  | 0.3896  | 0.3063  | 0.581   | -0.1653 | -0.6081 | -0.502  | -1.1203 | -0.2033 | -0.4112 |
| PBANKA_136360 | 0.2406  | -0.2033 | -0.1189 | 0.2188  | 0.0666  | 0.0516  | 0.225   | -0.0555 | 0.6018  | 0.4752  | 0.2823  | 0.8696  |
| PBANKA_135720 | 0.4549  | 0.4998  | 0.1257  | 0.0853  | 0.4493  | 0.2027  | -0.024  | -0.1586 | -0.3759 | -0.3495 | -0.6117 | -0.5786 |
| PBANKA_030580 | -0.2193 | -0.5502 | 0.1823  | 0.2007  | -0.1943 | 0.3628  | -0.1897 | -0.6373 | -1.0494 | -0.9912 | -0.5655 | -0.6046 |
| PBANKA_133820 | -1.5707 | -0.5103 | -1.5187 | -0.7611 | -0.9392 | -0.4872 | -0.153  | -0.2486 | 0.3822  | 0.6991  | 1.276   | 1.59    |
| PBANKA_100430 | -0.4948 | -0.3534 | -0.2732 | -0.0509 | 0.1196  | -0.0109 | 0.0443  | -0.0404 | 0.2292  | 0.3179  | -0.3204 | -0.2677 |
| PBANKA_031460 | 0.0461  | 0.5711  | -0.002  | 0.1355  | 0.1559  | 0.0339  | -0.3803 | -0.6355 | -0.4324 | -0.3969 | 0.2289  | -0.25   |
| PBANKA_101570 | -0.1846 | -0.8145 | -0.2205 | -1.1097 | -0.2771 | -0.6008 | -0.8299 | -0.8135 | -0.7958 | -1.1611 | -0.7461 | -0.5836 |
| PBANKA_094180 | -2.9094 | -3.1815 | -1.9237 | 0.1148  | 0.457   | 0.8271  | 1.3456  | 0.8886  | 1.8594  | 0       | -0.9687 | -1.3456 |
| PBANKA_051640 | 0.5818  | 0.373   | 0.3791  | 0.2773  | 0.1819  | 0.1344  | -0.4037 | -0.3608 | -0.1617 | -0.9307 | -0.7305 | -0.322  |
| PBANKA_021390 | -0.6743 | -1.7067 | -0.2251 | 0.1342  | -0.3005 | -0.3444 | 0.0973  | 0.0183  | 0.4254  | 0.5223  | 1.1437  | 1.4057  |
| PBANKA_146070 | 0.0886  | 0.4639  | 0.0565  | -0.2302 | -0.2187 | -0.2101 | -0.3417 | 0.0828  | 0.3778  | 0.377   | 0.9431  | 0.8002  |
| PBANKA_146380 | 0.0581  | -0.262  | 0.007   | 0.0345  | 0.1363  | -0.1307 | -0.1984 | -0.0765 | 0.2648  | 0.3901  | 0.4398  | 0.7568  |
| PBANKA_093400 | -0.0492 | -0.4978 | -0.7563 | -0.9907 | -0.7043 | -0.9094 | -0.5968 | -0.4916 | -0.2758 | -0.3498 | -0.3924 | 0.5393  |
| PBANKA_120650 | -0.3876 | 0.0732  | 0.1096  | 0.0993  | -0.0096 | 0.313   | 0.3688  | -0.0325 | 0.096   | -0.0664 | -0.6098 | -0.736  |
| PBANKA_010790 | 0.3754  | 0.6563  | 0.0558  | -0.3039 | 0.0385  | 0.4089  | -0.0374 | 0.3864  | 0.3145  | 0.4188  | 0.3905  | 0.0244  |
| PBANKA_111730 | -0.0292 | -0.8541 | 0.1419  | 0.4468  | 0.3206  | -0.3395 | 0.0813  | 0.1707  | 0.0546  | -0.2371 | -0.5719 | -0.6681 |
| PBANKA_142840 | -0.446  | -0.2804 | -0.5059 | 0.0372  | 0.0628  | 0.0165  | 0.1763  | 0.1128  | -0.2682 | -0.0877 | -0.3369 | -0.6099 |
| PBANKA_081580 | -0.4831 | -0.3589 | -0.4567 | -0.1201 | -0.0438 | 0.3094  | 0.2556  | -0.1708 | 0.5864  | 0.1852  | 0.122   | 0.2611  |
| PBANKA_113140 | -0.0603 | -0.4954 | -0.3498 | -0.537  | -0.2262 | -0.0189 | 0.0815  | 0.1465  | 1.143   | 0.6489  | 1.39    | 0.8251  |

|               |         |         |         |         |         |         |         |         |         |         |         |         |
|---------------|---------|---------|---------|---------|---------|---------|---------|---------|---------|---------|---------|---------|
| PBANKA_140470 | -0.7176 | 0.4919  | -0.8507 | -0.7495 | -0.3277 | -0.4972 | -0.1225 | 0.1796  | -0.6473 | 0.2376  | 0.1106  | -1.1064 |
| PBANKA_102930 | 0.1681  | 0.1868  | 0.3777  | 0.1095  | 0.1983  | 0.3656  | -0.4117 | 0.1633  | -0.5461 | -0.6738 | -0.5978 | -0.8374 |
| PBANKA_121170 | -0.5638 | -0.2004 | -0.3378 | 0.1657  | 0.3193  | 0.0092  | 0.2971  | 0.2997  | 0.0438  | -0.2106 | -0.8329 | -0.4829 |
| PBANKA_121400 | 0.3751  | 0.8293  | 0.4363  | 0.1167  | 0.4005  | 0.011   | -0.9786 | -0.8708 | -1.5482 | -1.3557 | -2.2227 | -1.2835 |
| PBANKA_121990 | -0.3303 | 0.6097  | -0.0596 | 0.5145  | -0.0074 | -0.1497 | -0.0305 | -0.0456 | -0.0644 | 0.0275  | -0.7227 | -0.2879 |
| PBANKA_110760 | -0.7536 | -0.5361 | -0.4869 | -0.5039 | -0.3296 | 0.5243  | 0.7569  | 0.8299  | 0.7853  | 0.848   | 0.3069  | -0.1322 |
| PBANKA_122190 | 0.4739  | -0.9909 | 0.1503  | 0.4309  | 0.2067  | 0.6088  | -0.1502 | -0.2891 | -0.0619 | -0.3296 | -0.2455 | 0.2912  |
| PBANKA_041490 | 0.2334  | 0.7669  | -0.0912 | -0.1427 | 0.2745  | -1.2434 | -0.0229 | 0.8051  | 0.4191  | 0.2815  | -0.0057 | 0.4829  |
| PBANKA_020280 | -0.0097 | -0.058  | 0.332   | 0.8893  | 0.2087  | -0.0867 | 0.0613  | 0.0759  | -0.2271 | -0.6573 | -0.339  | -0.4938 |
| PBANKA_083670 | -1.0411 | -0.7957 | -0.2147 | -0.3505 | -0.1138 | 0.1664  | 0.0502  | -0.1138 | -0.2188 | -0.2578 | -0.4749 | -1.3325 |
| PBANKA_102870 | -1.1551 | -0.6435 | -0.6113 | -0.1256 | 0.1747  | 0.3092  | 0.448   | 0.533   | 0.1451  | -0.0503 | -0.2312 | 0.3517  |
| PBANKA_120180 | -0.4088 | -1.2202 | -0.8632 | -0.6572 | -0.2306 | -0.4607 | -0.3643 | 0.2643  | 0.4146  | 0.719   | 0.5969  | 0.5462  |
| PBANKA_051680 | 0.4477  | 0.1799  | 0.203   | 0.2572  | 0.3668  | 0.3129  | -0.1722 | -0.1186 | -0.259  | -0.5534 | -0.6227 | -0.437  |
| PBANKA_146480 | 0.1926  | -0.4019 | -0.1944 | 0.6233  | 0.1624  | 0.3687  | -0.1084 | -0.2773 | 0.1795  | 0.2699  | 0.7224  | 1       |
| PBANKA_011020 | 0.6628  | 0.9493  | 0.6093  | 0.8375  | 0.2272  | 0.1975  | -0.1438 | -0.6418 | -0.3378 | -0.7987 | -0.3311 | -0.6732 |
| PBANKA_144350 | 0.1459  | 0.3797  | 0.1739  | 0.1209  | 0.0842  | 0.1413  | 0.2445  | 0.4887  | 0.1806  | 0.201   | -0.4274 | -0.5545 |
| PBANKA_145420 | -0.309  | -0.079  | -0.1366 | -0.0099 | 0.0394  | -0.0071 | 0.2442  | 0.5309  | 0.3257  | 0.635   | 0.0799  | -0.2814 |
| PBANKA_071040 | 0.458   | -0.2813 | -0.0305 | -0.2396 | 0.1026  | 0.105   | 0.3932  | 0.4759  | 0.1894  | 0.4957  | -0.6839 | -0.3651 |
| PBANKA_093290 | -0.3576 | 0.4608  | -0.0329 | -0.2415 | 0.2413  | 0.0858  | -0.1492 | 0.0658  | 0.1926  | -0.0839 | -0.9573 | 0.0224  |
| PBANKA_141710 | 0.0815  | 0.0281  | 0.29    | 0.068   | 0.1935  | -0.1146 | 0.2079  | 0.3066  | 0.1474  | -0.5806 | -0.4785 | -0.9289 |
| PBANKA_061660 | -0.3119 | -0.4917 | -0.1202 | 0.2859  | 0.2386  | 0.4768  | 0.2644  | 0.1303  | -0.1599 | -0.6344 | -0.9172 | -0.8911 |
| PBANKA_111570 | -0.9742 | -0.6452 | -0.6622 | -0.314  | -0.0842 | 0.33    | 0.2896  | 0.4642  | 0.6084  | 0.6502  | 0.4788  | -0.0191 |
| PBANKA_134670 | 0.215   | -0.2521 | 0.1201  | 0.4781  | 0.3644  | 0.1691  | -0.3368 | -0.8501 | -0.8687 | -1.599  | -1.5444 | -0.826  |
| PBANKA_123380 | 0.2832  | 0.1838  | 0.5021  | 0.4971  | 0.5606  | 0.5228  | -0.0217 | -0.3279 | -0.5306 | -0.8676 | -0.7319 | -0.9078 |
| PBANKA_050540 | -0.1304 | 0.2238  | -0.0186 | 0.3957  | 0.3327  | -0.0355 | 0.5649  | 0.6079  | 0.4632  | 0.4617  | 0.2828  | 0.5043  |
| PBANKA_030280 | 0.2056  | -0.3695 | 0.3112  | 0.2463  | 0.2291  | -0.5846 | -0.0352 | 0.1337  | -0.0113 | 0.1179  | -0.3071 | -0.0656 |
| PBANKA_020630 | -1.5753 | -0.946  | -1.3802 | -0.4478 | -0.2107 | 0.4049  | 0.3912  | 0.503   | 0.3651  | 0.3128  | -0.4063 | -0.9055 |
| PBANKA_111370 | -0.1116 | 0.113   | -0.4945 | -0.2924 | -0.1694 | -0.4006 | -0.7154 | -0.4437 | 0.1838  | 0.4387  | 0.8458  | 1.0109  |
| PBANKA_050740 | 0.543   | 0.5005  | 0.4834  | -0.0564 | -0.0011 | -0.1442 | -0.0837 | -0.3921 | -0.6292 | -0.9807 | -0.8337 | -0.8345 |
| PBANKA_094220 | 0.4921  | 0.1857  | 0.6529  | 0.3514  | 0.2318  | 0.2178  | -0.4042 | -0.8613 | -1.0291 | -1.5858 | -1.1366 | -1.4176 |
| PBANKA_101530 | -0.0677 | -0.5688 | 0.134   | 0.0414  | 0.3944  | 0.1984  | 0.2567  | 0.2702  | 0.2182  | -0.0656 | -0.172  | -0.3539 |
| PBANKA_144510 | 0.0393  | -0.1594 | 0.3538  | 0.2651  | 0.2313  | 0.2371  | -0.0876 | -0.4321 | -1.085  | -1.3023 | -1.1002 | -1.0493 |
| PBANKA_031050 | -0.2276 | 0.1277  | -0.0427 | -0.0637 | -0.0949 | -0.0093 | 0.3681  | 0.2568  | 0.3031  | 0.2209  | 0.571   | 0.1433  |
| PBANKA_133310 | -0.0303 | 0.032   | -0.1107 | 0.0342  | -0.196  | -0.0735 | -0.2807 | 0.2301  | 0.4391  | 0.6515  | 0.6844  | 1.1045  |
| PBANKA_082840 | -0.3299 | -0.8312 | -0.4376 | -0.1129 | 0.0035  | 0.3852  | 0.1964  | 0.6022  | 0.0621  | 0.5989  | -0.1751 | -0.6394 |
| PBANKA_113420 | 0.1396  | 0.5284  | 0.5338  | -0.0472 | 0.0425  | 0.3374  | -0.0661 | -0.4251 | -1.0376 | -1.5735 | -1.1225 | -1.1336 |
| PBANKA_145520 | 0.3763  | 0.5482  | -0.235  | 0.2357  | -0.3589 | -0.4199 | -0.305  | -0.0841 | 0.2627  | 1.0686  | 1.0147  | 1.106   |
| PBANKA_122880 | -0.7659 | -0.0091 | -0.6196 | -0.3437 | -0.5044 | -0.3978 | -0.1348 | 0.1647  | 0.6457  | 1.0553  | 0.6806  | 0.707   |
| PBANKA_124400 | 0.1802  | 0.0824  | 0.2713  | 0.3573  | 0.1525  | 0.4371  | 0.0696  | -0.3881 | -0.5992 | -0.6755 | 0.019   | -0.6901 |
| PBANKA_122590 | -0.1748 | 0.5577  | 0.3566  | 0.0829  | 0.0807  | -0.3515 | -0.0988 | 0.2004  | 0.4774  | 0.5415  | 0.2991  | 0.8282  |
| PBANKA_111700 | -2.2056 | -1.4699 | -1.8202 | -0.8048 | -0.2036 | 0.2618  | 0.4867  | 0.6667  | 0.8407  | 1.3068  | -0.2365 | -1.4517 |
| PBANKA_123090 | -0.2505 | 0.7535  | 0.008   | -0.5826 | -0.1279 | -0.8866 | -0.0822 | -0.0548 | -0.6183 | -0.3855 | -0.9931 | -0.174  |
| PBANKA_051930 | -1.7006 | -0.7838 | -2.1392 | -1.3152 | -0.682  | -0.2769 | 0.7513  | 0.8741  | 1.0032  | 1.2554  | 0.2104  | -0.6372 |
| PBANKA_010130 | 0.4093  | 0.245   | 0.2148  | 0.7176  | 0.3087  | 0.306   | -0.1876 | -0.2993 | -0.2578 | -0.414  | -0.006  | -0.6567 |
| PBANKA_100730 | -0.013  | -0.0011 | 0.004   | 0.2362  | 0.2721  | 0.6746  | 0.2953  | -0.4458 | -0.4259 | -0.5331 | -0.3458 | -0.5743 |
| PBANKA_132810 | -0.2947 | 0.6258  | -0.0509 | 0.0721  | 0.2234  | 0.4041  | 0.1351  | 0.0002  | -0.1077 | 0.0327  | -0.0175 | -0.0535 |
| PBANKA_136300 | -0.3577 | -0.1911 | 0.1617  | 0.284   | -0.1918 | -0.0512 | 0.0865  | -0.1995 | -0.1373 | -0.3971 | -0.0639 | 0.6766  |
| PBANKA_062160 | 0.0808  | 0.1539  | 0.0635  | -0.0545 | 0.0505  | 0.0631  | -0.121  | 0.2926  | -0.1451 | -0.1348 | 0.1332  | -0.54   |
| PBANKA_090410 | -0.9107 | -0.5958 | -0.6985 | -0.5511 | -0.2296 | 0.0875  | 0.0985  | 0.2477  | 0.2183  | 0.0195  | -0.3255 | -0.6501 |
| PBANKA_050330 | -0.0766 | 0.0362  | -0.057  | 0.1486  | -0.0044 | 0.4076  | 0.251   | 0.6194  | 0.7602  | 0.772   | 0.3057  | 0.2941  |
| PBANKA_130170 | 0.3376  | -0.0975 | -0.2089 | 0.3795  | -0.1947 | 0.3345  | 0.0786  | 0.4697  | 0.3761  | 0.1254  | -0.2823 | -0.4047 |
| PBANKA_136430 | -0.5042 | -1.23   | -0.1407 | 0.1146  | 0.3279  | 0.3648  | 0.0004  | -0.3314 | -0.531  | -0.8037 | -0.2959 | 0.0792  |
| PBANKA_040670 | 0.1616  | 0.1273  | 0.4116  | 0.6037  | 0.44    | 0.5191  | -0.1636 | -0.8971 | -1.3479 | -1.6509 | -1.164  | -1.2882 |
| PBANKA_111960 | -0.7444 | -0.8846 | -0.4997 | -1.2923 | -0.3986 | -0.4744 | 0.2699  | 0.7483  | 1.3503  | 1.2884  | 0.6665  | -0.0556 |
| PBANKA_061600 | -0.1186 | -0.4015 | 0.4805  | 0.2534  | 0.1246  | 0.7124  | 0.0759  | -0.6403 | -0.7592 | -0.7349 | -0.9135 | -0.5651 |
| PBANKA_094140 | -1.2096 | -0.8671 | -0.7466 | -0.2745 | -0.2219 | 0.5949  | 0.125   | 0.1811  | 0.6039  | 0.6034  | 0.5525  | 0.7475  |
| PBANKA_143980 | 0.1304  | 0.2215  | 0.191   | 0.2315  | -0.2422 | 0.2599  | 0.4401  | 0.451   | 0.1438  | 0.3506  | -0.2748 | 0.5746  |
| PBANKA_081030 | -0.0109 | -0.0461 | -0.1867 | 0.3095  | 0.0815  | -0.0027 | -0.1637 | 0.1321  | 0.2909  | 0.2614  | -0.6022 | 0.0808  |
| PBANKA_050890 | 0.1159  | -0.2116 | 0.0675  | 0.1255  | 0.0584  | 0.2196  | 0.3817  | 0.4988  | 0.2709  | -0.2089 | -0.6431 | -0.7567 |
| PBANKA_110220 | 0.6003  | 0.5265  | -0.0007 | -0.1331 | -0.1665 | -0.3853 | -0.8733 | -0.3593 | -0.1427 | 0.3592  | 0.7151  | 1.2688  |
| PBANKA_093430 | -0.8631 | -0.8467 | -0.5866 | -0.0893 | -0.2516 | 0.352   | 0.5098  | 0.3232  | 0.4162  | 0.3231  | -0.5842 | -0.7577 |
| PBANKA_051340 | 0.2399  | 0.0864  | 0.2144  | 0.0444  | -0.037  | 0.2443  | 0.0614  | 0.4031  | 0.3734  | 0.4014  | -0.1382 | -0.8817 |
| PBANKA_082520 | 0.2272  | 0.3943  | 0.2626  | -0.0531 | 0.1155  | 0.3697  | 0.3932  | 0.2117  | 0.0103  | 0.0496  | -0.3478 | 0.0212  |

|               |         |         |         |         |         |         |         |         |         |         |         |         |
|---------------|---------|---------|---------|---------|---------|---------|---------|---------|---------|---------|---------|---------|
| PBANKA_130620 | 0.5125  | 0.664   | 0.5076  | 0.0641  | 0.1034  | -0.3218 | -0.242  | -0.7849 | -0.7842 | -1.4029 | -0.9831 | -1.0058 |
| PBANKA_030690 | -0.7966 | -0.8072 | -0.4416 | 0.0362  | 0.2368  | 0.3584  | 0.4501  | 0.1329  | -0.2251 | -0.6466 | -0.8557 | -0.7791 |
| PBANKA_071560 | -0.1264 | 0.041   | 0.0777  | 0.0695  | 0.281   | 0.3321  | -0.0058 | -0.2366 | -0.551  | -0.8579 | -0.935  | -1.2368 |
| PBANKA_081920 | -0.0539 | 0.1977  | 0.1296  | 0.802   | 0.3969  | -0.1503 | 0.0791  | -0.0219 | 0.3035  | -0.2696 | -0.2864 | -0.7741 |
| PBANKA_131790 | 0.2956  | 0.5245  | -0.1923 | -0.1479 | -0.3137 | -0.1631 | -0.6626 | -0.6839 | -0.5993 | -0.0103 | 0.2434  | 0.4164  |
| PBANKA_140940 | 0.3303  | 0.048   | 0.5792  | 0.1797  | 0.2586  | 0.2414  | -0.1924 | -0.9238 | -1.2376 | -1.2512 | -0.6903 | -0.4912 |
| PBANKA_140520 | -0.2984 | 0.1804  | -0.1408 | 0.0265  | 0.4765  | 0.0242  | -0.0498 | 0.0096  | -0.2901 | 0.0897  | -0.3825 | -0.2988 |
| PBANKA_090550 | -0.3796 | -0.6818 | 0.0217  | -0.4167 | -0.1768 | 0.0764  | 0.2866  | 0.486   | 0.883   | 0.9113  | 0.3217  | 0.4444  |
| PBANKA_146340 | 0.2449  | 0.4046  | 0.1979  | 0.4255  | 0.4204  | 0.5002  | -0.1554 | -0.3958 | -0.4132 | -0.6767 | -0.5238 | -0.0134 |

*P. chabaudi* (AS)

| geneid        | TP01   | TP02   | TP03   | TP04   | TP05   | TP06   | TP07   | TP08   | TP09   | TP10   | TP11   | TP12   |
|---------------|--------|--------|--------|--------|--------|--------|--------|--------|--------|--------|--------|--------|
| PCHAS_041250  | 0.2865 | 0.2733 | 0.6437 | 0.2222 | 0.1872 | 0.137  | -0.235 | 0.1366 | 0.0774 | -0.211 | -0.123 | -0.144 |
| PCHAS_090260  | -0.275 | 0.4599 | 0.2586 | -0.074 | 0.072  | -0.299 | -0.543 | -0.135 | -0.385 | -0.21  | 0.1946 | -0.032 |
| PCHAS_123420  | -0.167 | -0.601 | 0.4062 | 0.1035 | 0.1734 | -0.735 | 0.0318 | 0.6015 | -0.122 | 0.1723 | 0.2563 | -0.032 |
| PCHAS_081730  | -0.368 | -0.548 | -0.22  | -0.431 | -0.086 | 0.3972 | 0.8539 | -0.167 | 0.1694 | -0.637 | -0.068 | 0.4328 |
| PCHAS_111430  | 0.0742 | 0.3555 | 0.9136 | -0.3   | -0.016 | -0.3   | -0.234 | -0.468 | -0.619 | -0.325 | 0.0499 | -0.338 |
| PCHAS_090270  | 0.4794 | -0.152 | 0.6852 | -0.193 | 0.1382 | -0.252 | 0.0315 | 0.6671 | -0.069 | 0.5077 | 0.3356 | 0.402  |
| PCHAS_112350  | 0.6576 | 0.0357 | 0.383  | 0.0148 | 0.2195 | -0.212 | 0.0899 | 0.8091 | -0.175 | 0.6192 | 0.3072 | 0.0468 |
| PCHAS_111040  | 0.9097 | -0.302 | 0.1488 | -0.22  | -0.036 | -0.246 | 1.4671 | -0.196 | -0.011 | -0.707 | 0.1736 | -0.567 |
| PCHAS_141050  | -0.099 | -0.564 | 0.5295 | -0.142 | 0.148  | -0.124 | 0.5597 | 0.5964 | -0.124 | -0.186 | 0.0603 | 0.0663 |
| PCHAS_124180  | -0.35  | 0.7333 | 0.7683 | 0.1018 | 0.0398 | -0.031 | -0.591 | -0.066 | 0.1238 | 0.1743 | -0.031 | 0.2237 |
| PCHAS_090930  | -0.738 | -0.108 | -0.21  | 0.0503 | 0.1503 | 0.2361 | 0.1801 | 0.2694 | 0.3002 | 0.1474 | -0.015 | 0.0206 |
| PCHAS_140500  | 0.0559 | 0.309  | 0.9874 | 0.6306 | 0.3453 | 0.0037 | -0.232 | -0.005 | 0.1679 | -1.11  | -0.673 | -0.508 |
| PCHAS_071260  | 0.8473 | 0.0992 | -0.483 | -0.125 | -0.233 | -0.152 | -0.031 | 0.2972 | -0.177 | 0.0456 | 0.5659 | 0.1342 |
| PCHAS_135780  | 1.7356 | 0.5458 | -0.344 | -0.082 | 0.1824 | 0.0085 | 0.1333 | 0.0821 | 0.0088 | 0.497  | 0.1189 | 0.1676 |
| PCHAS_142120  | 0.5519 | -0.164 | 0.2988 | -0.037 | 0.1169 | 0.0645 | 0.3871 | 0.2193 | 0.1062 | -0.139 | 0.016  | 0.2409 |
| PCHAS_134710  | 0.4101 | 0.1074 | -0.282 | 0.0895 | 0.021  | -0.235 | -0.236 | -0.832 | -0.22  | -0.305 | 0.1402 | 0.4459 |
| PCHAS_000920  | 0.2842 | -0.166 | 0.2948 | 0.4185 | -0.004 | 0.4207 | 0.2142 | 0.3479 | 0.4301 | -0.4   | 0.1455 | -0.187 |
| PCHAS_010870  | -0.153 | -1.106 | 0.331  | -0.309 | 0.2522 | -0.296 | 0.2962 | 0.1987 | -0.277 | -0.584 | 0.0644 | -0.12  |
| PCHAS_132480  | 0.0309 | -0.117 | 0.0819 | 0.1191 | -0.215 | 0.1887 | -0.072 | -0.297 | 0.071  | -2.001 | -0.996 | -0.841 |
| PCHAS_041110  | -0.388 | 0.4153 | -0.256 | 0.2503 | 0.3792 | -0.186 | -0.371 | -0.345 | 0.0953 | 0.0521 | -0.125 | 0.0671 |
| PCHAS_082990  | -0.492 | 2.1759 | 1.0341 | 1.1933 | 0.1655 | 1.0915 | 0.9864 | 0.7224 | 1.1874 | 0.7604 | 0.124  | 1.1511 |
| PCHAS_062110  | 0.6249 | 0.4418 | 0.2393 | 0.0098 | -0.072 | -0.112 | -0.548 | 0.634  | -0.304 | 0.6403 | 0.0914 | 0.6798 |
| PCHAS_010650  | 0.132  | 0.09   | 0.6126 | 0.1357 | 0.1506 | 0.0883 | 1.5523 | 0.6474 | -0.06  | 0.1395 | 0.4842 | 0.2361 |
| PCHAS_120900  | -0.083 | 0.567  | 0.4551 | 0.4771 | 0.1814 | -0.861 | -0.006 | 0.4967 | -0.284 | -0.19  | 0.1385 | 0.093  |
| PCHAS_112470  | -0.38  | -0.251 | -0.32  | -0.207 | -0.036 | 0.3577 | -0.503 | -0.04  | 0.4557 | 0.4468 | 0.375  | 0.2782 |
| PCHAS_133610  | 1.0293 | -0.122 | 0.371  | 0.1206 | 0.2408 | 0.8074 | 0.5419 | -0.332 | 0.6028 | -1.004 | 0.0232 | -0.629 |
| PCHAS_111790  | 0.0274 | 0.8779 | 0.6143 | 0.5611 | -0.193 | 0.0142 | -0.062 | 0.0204 | 0.3511 | 0.4452 | 0.1073 | 1.0463 |
| PCHAS_111620  | 0.9984 | 0.3691 | 0.1888 | -0.081 | -0.141 | -0.541 | -0.405 | -0.66  | -0.655 | -0.781 | -0.436 | -0.668 |
| PCHAS_071940  | -0.231 | 0.2849 | 0.2205 | 0.2126 | 0.2269 | 0.1541 | 0.9067 | -0.55  | -0.074 | -0.18  | -0.184 | -0.428 |
| PCHAS_136520  | 0.4402 | -0.004 | 0.3252 | -0.186 | -0.229 | -0.152 | 0.6372 | 0.14   | -0.4   | -0.431 | 0.0135 | -0.068 |
| PCHAS_112780  | -0.202 | -0.045 | -2.178 | 0.8997 | -1.605 | 1.3414 | 0.7225 | -0.677 | 1.5082 | -0.463 | -0.597 | -0.295 |
| PCHAS_010180  | 0.0316 | 0.6418 | 0.1538 | 0.2536 | -0.077 | 0.4268 | -0.103 | -0.196 | 0.4605 | 1.3677 | 0.5787 | 0.5837 |
| PCHAS_113890  | 0.2759 | 0.0979 | -0.015 | 0.0388 | 0.2017 | -0.849 | 0.3017 | 0.6768 | -0.288 | 0.0412 | 0.0991 | 0.6297 |
| PCHAS_120370  | -0.179 | 0.3131 | -0.136 | -0.056 | 0.1821 | -0.102 | -0.21  | 0.4748 | -0.049 | 0.2683 | 0.0312 | 0.4141 |
| PCHAS_104130  | -0.66  | 1.1648 | 1.1587 | 0.8312 | 0.2382 | 0.7934 | -1.388 | -0.219 | 0.6008 | -0.081 | -0.871 | -0.061 |
| PCHAS_133570  | -0.524 | -0.235 | -0.144 | 0.209  | 0.0477 | 1.1177 | 2.0995 | 0.2791 | 1.4839 | 0.6644 | 0.4599 | 0.336  |
| PCHAS_020010  | 0.5443 | 0.8692 | 0.4036 | 0.1854 | 0.0542 | -0.33  | -0.126 | -0.346 | -0.238 | 0.0163 | 0.2429 | 0.8816 |
| PCHAS_093330  | 0.8487 | 0.0712 | 0.862  | -0.077 | -0.682 | -0.547 | 0.8416 | 0.661  | -0.3   | -0.464 | 0.3421 | -0.718 |
| PCHAS_130770  | 0.2181 | 0.4605 | -0.119 | 0.221  | 0.265  | -0.105 | 0.4116 | -0.203 | 0.1113 | -0.393 | -0.213 | -0.762 |
| MAL9_18S:rRNA | 0.2061 | 0.1582 | -0.46  | 0.3271 | -0.126 | 0.942  | 0.547  | -0.151 | 0.749  | 0.056  | -0.048 | -0.065 |
| PCHAS_133930  | -0.546 | -1.799 | 0.2325 | -0.211 | 0.031  | -0.336 | 0.6655 | 0.0053 | -0.042 | 0.078  | 0.8877 | 0.368  |
| PCHAS_041360  | -1.214 | -0.389 | -0.36  | -0.284 | 0.1037 | 0.0984 | -0.417 | 1.1471 | 0.1573 | 1.0258 | 0.8362 | 0.3721 |
| PCHAS_113500  | 2.1468 | 0.8729 | 0.6332 | 0.8415 | -0.097 | 0.9558 | 2.7799 | 0.8662 | 0.7189 | 0.5903 | -0.003 | 0.2461 |
| PCHAS_146150  | -0.72  | 0.5844 | 0.2387 | 0.0121 | 0.0423 | -0.362 | 0.6162 | 0.4609 | -0.014 | -0.168 | 0.1647 | 0.0773 |
| PCHAS_051110  | 0.2799 | -0.747 | -2.467 | 0.6393 | -1.246 | 0.1181 | -0.018 | 0.3798 | 0.4861 | -0.678 | 0.2914 | 0.8287 |
| PCHAS_142170  | -0.536 | -0.117 | -0.242 | -0.311 | -0.148 | -0.596 | -0.57  | -0.425 | -0.519 | -0.376 | 0.2976 | -0.341 |
| PCHAS_145310  | 1.5204 | -0.009 | 0.3619 | -0.256 | 0.1793 | -0.623 | 0.7551 | 0.8069 | -0.594 | -0.759 | 0.3506 | -0.262 |
| PCHAS_050210  | 0.7197 | -0.208 | 0.8732 | 0.126  | 0.1727 | -0.095 | 0.1796 | 0.4149 | -0.152 | 0.1394 | 0.0114 | 0.0815 |



|              |        |        |        |        |        |        |        |        |        |        |        |        |
|--------------|--------|--------|--------|--------|--------|--------|--------|--------|--------|--------|--------|--------|
| PCHAS_041990 | -1.272 | -1.402 | -0.468 | 0.1157 | -0.127 | 0.3434 | 1.1226 | 0.797  | 0.326  | 0.4395 | 0.3791 | 0.3641 |
| PCHAS_080180 | -0.41  | 0.4203 | 0.6349 | 0.1568 | 0.2568 | 0.251  | 0.2379 | -0.244 | -0.184 | -0.234 | 0.0567 | -0.095 |
| PCHAS_131550 | -0.139 | 0.0417 | 0.2058 | 0.3564 | 0.1469 | -0.251 | 0.1178 | -0.164 | -0.36  | -1.059 | -0.817 | -0.24  |
| PCHAS_143860 | -0.065 | -0.29  | 0.3609 | -0.289 | 0.2277 | -0.278 | 1.1321 | -0.288 | -0.212 | -0.541 | 0.0513 | -0.107 |
| PCHAS_120950 | 0.4562 | 0.2236 | 0.6293 | 0.1742 | 0.3093 | -0.291 | 0.5943 | 0.1855 | 0.1465 | -0.471 | -0.153 | -0.129 |
| PCHAS_081060 | -0.182 | 0.4685 | 0.477  | -0.116 | 0.0012 | 0.0351 | -0.093 | 0.3336 | -0.324 | -0.291 | 0.1606 | -0.463 |
| PCHAS_091670 | -0.593 | 0.0596 | 0.285  | -0.016 | -0.147 | -0.441 | -0.112 | 0.2654 | -0.166 | 0.595  | 0.5115 | 0.8124 |
| PCHAS_114320 | 0.259  | -0.288 | -0.075 | 0.2705 | 0.4205 | -0.484 | -0.112 | 0.1917 | -0.134 | 0.0503 | -0.153 | -1.083 |
| PCHAS_143010 | -0.059 | 0.4992 | 1.0443 | 0.1419 | 0.0951 | 0.1921 | -0.444 | -0.481 | -0.589 | -0.346 | -0.036 | -0.512 |
| PCHAS_134120 | 1.536  | -0.847 | -0.178 | -0.92  | -0.281 | -0.689 | 1.0036 | 0.2582 | -0.356 | 1.0504 | 1.5774 | 0.7004 |
| PCHAS_041470 | -0.911 | 0.0809 | 0.4431 | 0.0521 | 0.2112 | 0.3282 | 0.405  | 0.0252 | 0.5567 | -0.276 | 0.405  | -0.074 |
| PCHAS_070120 | 0.4197 | 0.3696 | 0.355  | 0.6575 | 0.0407 | 1.1131 | -0.795 | 0.5534 | 1.0035 | 1.0752 | 0.3445 | 0.8053 |
| PCHAS_135670 | -0.408 | 0.4551 | 0.0039 | 0.3106 | 0.3417 | -0.007 | -0.243 | 0.337  | 0.3137 | 0.4011 | 0.0412 | 0.1856 |
| PCHAS_131130 | 0.2702 | 0.2557 | 0.2758 | 0.3568 | 0.0913 | 1.0407 | 0.8529 | -0.292 | 0.9078 | 0.0238 | -0.316 | -0.012 |
| PCHAS_112420 | -0.048 | -1.013 | 0.5692 | -0.148 | 0.142  | -0.332 | -0.24  | -0.728 | -0.597 | -1.395 | -0.737 | -0.298 |
| PCHAS_146110 | 0.5978 | 0.7407 | 0.953  | 0.3615 | 0.0518 | 0.3696 | 0.3727 | 0.0506 | 0.3377 | -0.236 | 0.3036 | 0.3875 |
| PCHAS_061810 | -0.187 | 0.2234 | -0.229 | -0.116 | 0.1216 | -0.75  | -0.31  | -0.19  | -0.545 | 0.055  | 0.2778 | 0.3599 |
| PCHAS_124530 | -0.739 | 0.351  | -0.469 | -0.121 | -0.098 | -0.678 | -0.496 | -0.121 | -0.18  | 0.0556 | 0.3157 | -0.251 |
| PCHAS_020420 | -0.304 | 0.7772 | 0.1032 | 0.369  | 0.1817 | 0.2437 | -0.209 | 0.0306 | 0.3268 | -0.208 | 0.267  | 0.4218 |
| PCHAS_030430 | 1.5975 | 0.3875 | 0.4081 | 0.0128 | 0.2271 | 0.286  | 0.3299 | 0.1165 | -0.07  | -0.304 | 0.3389 | -0.598 |
| PCHAS_040340 | -1.232 | 0.5994 | 0.6206 | 1.1523 | 0.1845 | 0.8098 | 0.0062 | 0.5302 | 0.7461 | 0.911  | 0.4654 | 0.8483 |
| PCHAS_123230 | 1.1749 | 0.8187 | -2.703 | 0.6817 | -0.1   | 0.6023 | 1.686  | -0.638 | 1.0804 | -0.147 | -0.154 | -0.134 |
| PCHAS_020860 | 0.5071 | 0.2784 | 0.262  | 0.2417 | 0.2253 | -0.306 | -0.246 | -0.715 | -0.334 | -2.073 | -1.078 | -1.6   |
| PCHAS_134030 | #####  | 0.3045 | -0.116 | 0.3021 | 0.1188 | 0.1757 | 0.7416 | -0.654 | -0.334 | 0.0662 | 0.0941 | 0.0309 |
| PCHAS_113800 | 1.1606 | -0.114 | 0.7361 | 0.0356 | 0.2425 | -0.46  | 0.5341 | 0.012  | -0.661 | -0.718 | 0.2069 | -0.747 |
| PCHAS_010810 | 0.652  | 0.6207 | 0.8124 | 0.182  | 0.5097 | 0.1015 | -0.023 | 1.0298 | -0.127 | -1.818 | -1.063 | -0.653 |
| PCHAS_122650 | 0.104  | 0.4499 | 0.7088 | 0.485  | 0.4069 | 0.7482 | 0.4811 | 0.29   | 0.6151 | 0.0462 | 0.0122 | 0.4019 |
| PCHAS_090730 | -0.35  | -0.829 | -2.268 | 0.7154 | -1.599 | -0.769 | 0.7734 | -0.525 | -0.72  | -0.323 | 2.1943 | 0.2644 |
| PCHAS_092920 | -0.179 | 0.0054 | -0.232 | 0.4312 | -0.058 | 0.2289 | -0.003 | 0.0276 | 0.3686 | 0.792  | 0.259  | 0.7905 |
| PCHAS_070990 | 0.1126 | -0.788 | -1.754 | 0.4617 | -0.327 | -0.051 | 0.503  | 0.2969 | -0.306 | 0.5435 | 1.9102 | 1.0138 |
| PCHAS_122610 | -0.012 | -0.071 | 0.4663 | 0.1787 | 0.3931 | 0.405  | 0.1676 | 0.4617 | 0.333  | -0.162 | 0.1031 | 0.6656 |
| PCHAS_061460 | -0.205 | 0.5304 | 0.4353 | -0.153 | 0.1879 | 0.5239 | 0.8267 | 1.1549 | 0.402  | 1.706  | 0.5958 | 1.1746 |
| PCHAS_136540 | 0.5063 | -0.577 | -0.095 | -0.67  | -0.022 | -0.5   | 0.0201 | 0.1744 | -0.334 | 0.8436 | 0.8465 | 0.3581 |
| PCHAS_072610 | 0.9034 | 0.557  | 0.5928 | 0.3963 | 0.0575 | 0.5282 | -0.266 | -0.52  | 0.6868 | -1.218 | -1.142 | -0.747 |
| PCHAS_135210 | 0.8675 | 0.473  | 0.461  | 0.2231 | 0.1229 | -1.15  | 0.5157 | -0.8   | -0.682 | -1.306 | -0.935 | -0.67  |
| PCHAS_142190 | -0.597 | -0.063 | 0.6312 | 0.4105 | 0.2778 | 0.1126 | 0.7168 | 0.2043 | 0.1426 | -0.353 | -0.025 | -0.292 |
| PCHAS_083440 | -0.119 | 0.5349 | 0.7566 | 0.0301 | 0.0919 | 0.3309 | 0.6372 | 0.3961 | 0.1783 | 0.053  | 0.158  | 0.1082 |
| PCHAS_082120 | -1.045 | 0.2977 | 0.5017 | 0.1763 | 0.0033 | 0.5824 | -1.082 | 0.0568 | 0.2688 | 0.1421 | -0.601 | -0.609 |
| PCHAS_112830 | 0.3646 | -0.253 | 0.5243 | 0.0103 | 0.3037 | 0.0582 | 0.5638 | 0.4841 | -0.221 | 0.4264 | -0.014 | 0.0283 |
| PCHAS_020270 | -0.927 | -0.348 | 0.3051 | 0.2006 | -0.087 | -0.067 | 0.5122 | -0.217 | -0.678 | 0.2627 | -0.194 | 0.1013 |
| PCHAS_136650 | 0.4712 | 0.3211 | 0.8928 | 0.2586 | 0.0836 | 0.1341 | 0.5797 | -0.009 | 0.1996 | 0.1217 | 0.0519 | 0.1171 |
| PCHAS_131570 | 1.1689 | 0.5052 | 1.1106 | -0.011 | 0.2289 | -0.078 | 1.3252 | 0.322  | -0.095 | -0.923 | 0.2151 | -0.07  |
| PCHAS_134110 | -0.079 | 0.0779 | 0.536  | -0.178 | -0.06  | 0.0219 | 0.2885 | -0.052 | -0.312 | -0.155 | 0.1648 | -0.444 |
| PCHAS_081990 | 0.2007 | 0.4267 | 0.1682 | 0.2086 | 0.1012 | 0.0653 | -0.325 | 0.4027 | 0.0935 | 0.5412 | -0.151 | 0.7844 |
| PCHAS_111500 | 0.8779 | 0.1549 | 1.268  | 0.1562 | 0.146  | -0.275 | 0.8979 | 0.0699 | -0.038 | -1.024 | 0.1809 | -0.654 |
| PCHAS_041850 | -0.828 | -0.497 | 0.2578 | 0.0542 | 0.2269 | -0.449 | 0.1114 | -0.211 | -0.375 | -0.713 | -0.589 | -0.261 |
| PCHAS_092930 | -0.728 | 0.0512 | 0.1124 | -0.39  | 0.0757 | 0.0503 | 0.2895 | -0.035 | -0.161 | -0.13  | 0.0887 | 0.3613 |
| PCHAS_030180 | 0.2888 | 0.4432 | 0.878  | 0.7047 | 0.0504 | 0.7958 | 0.431  | 0.3616 | 0.3671 | 0.1028 | 0.1856 | 0.5237 |
| PCHAS_031490 | -0.447 | 0.3053 | 0.5202 | 0.705  | 0.1033 | 0.1584 | -0.255 | -0.379 | -0.047 | -1.041 | -0.821 | -0.821 |
| PCHAS_133360 | -0.571 | -0.721 | 0.2873 | -0.366 | 0.0762 | -0.896 | -0.549 | -0.744 | -1.126 | -0.672 | 0.3862 | 0.0764 |

|              |        |        |        |        |        |        |        |        |        |        |        |        |
|--------------|--------|--------|--------|--------|--------|--------|--------|--------|--------|--------|--------|--------|
| PCHAS_120440 | 0.8485 | -0.048 | -0.012 | -0.252 | 0.2022 | -0.205 | -0.255 | 0.5194 | -0.264 | -1.754 | 0.043  | -0.171 |
| PCHAS_051790 | -0.011 | -1.078 | -2.451 | -0.084 | -0.683 | 0.6097 | 0.1078 | -0.744 | -0.324 | 0.0269 | 0.0642 | -0.12  |
| PCHAS_120880 | 0.6096 | 0.5184 | 1.0956 | 0.1839 | 0.2768 | -0.088 | -0.23  | -0.286 | -0.08  | -1.067 | -0.001 | -0.067 |
| PCHAS_070360 | 1.5855 | 0.0735 | 1.1132 | 0.2372 | 0.1793 | 0.0064 | -0.098 | 0.7143 | 0.1725 | -0.142 | 0.0168 | -0.31  |
| PCHAS_093230 | -0.048 | -0.103 | 0.2153 | 0.026  | 0.0584 | -0.096 | 0.1563 | 0.0476 | -0.165 | -1.013 | -0.749 | -0.693 |
| PCHAS_082450 | 0.055  | 0.5068 | 0.4987 | 0.268  | 0.112  | 0.8213 | 0.0658 | -0.36  | 0.4492 | -0.581 | 0.0974 | -0.23  |
| PCHAS_072620 | -0.017 | 0.2639 | -0.343 | 0.4484 | 0.1421 | 0.2592 | -0.857 | 0.2248 | 0.3126 | -0.679 | -0.766 | -0.405 |
| PCHAS_134930 | -0.079 | 0.007  | 0.0621 | -0.576 | -0.401 | -0.072 | -0.069 | -0.384 | -0.215 | 0.2585 | 1.793  | 0.6177 |
| PCHAS_132710 | 0.1243 | -0.276 | 0.4022 | -0.052 | 0.0854 | -0.119 | -0.012 | 0.1222 | -0.082 | 0.4936 | 0.0529 | 0.2159 |
| PCHAS_132870 | -0.707 | -0.051 | 0.1279 | 0.1794 | 0.1649 | -0.138 | 0.9652 | 0.5268 | -0.146 | -0.219 | 0.0646 | 0.2269 |
| PCHAS_113840 | -0.498 | -0.104 | 0.0939 | 0.2812 | 0.4399 | 0.2142 | -0.066 | 0.1037 | 0.2072 | -0.101 | -0.048 | 0.4537 |
| PCHAS_072300 | 0.136  | -0.146 | 0.1816 | 0.0333 | -0.902 | 0.1757 | -0.475 | 0.4768 | 0.0085 | 1.547  | 0.9224 | 0.5906 |
| PCHAS_083120 | 0.303  | -0.59  | 0.024  | -0.179 | 0.0317 | -0.052 | -0.211 | -0.15  | -0.856 | 0.3535 | 0.4073 | -0.561 |
| PCHAS_143120 | -0.19  | -0.115 | 0.6552 | -0.076 | -0.022 | -0.479 | 0.1677 | 0.6448 | -0.258 | 0.1781 | 0.2736 | 0.0025 |
| PCHAS_082010 | 1.1421 | 0.4019 | 0.273  | -0.277 | -0.224 | -0.733 | 0.1186 | -0.811 | -0.693 | -1.231 | -0.029 | -0.846 |
| PCHAS_136800 | 0.4242 | 0.2643 | 0.0838 | -0.035 | -0.22  | 0.2848 | -0.059 | -0.541 | -0.397 | 0.6624 | 0.0869 | 0.1868 |
| PCHAS_146300 | -0.422 | 0.2971 | 0.0673 | 0.0956 | 0.1603 | -0.021 | -0.279 | -0.647 | -0.331 | -0.107 | 0.1217 | -0.122 |
| PCHAS_134630 | -0.408 | 0.1943 | -0.1   | 0.1486 | 0.4112 | -0.069 | -0.378 | -0.789 | -0.137 | 0.0402 | 0.1634 | -0.472 |
| PCHAS_080250 | -0.494 | -1.002 | -1.168 | -0.927 | -0.26  | 0.7107 | 0.0449 | -0.187 | 0.3979 | 2.1274 | 1.6262 | 1.6284 |
| PCHAS_122510 | -0.229 | -0.216 | 0.1576 | -0.198 | -0.076 | -0.401 | -0.232 | 0.1395 | -0.598 | 0.1992 | 0.1757 | 0.6769 |
| PCHAS_120870 | -0.137 | -1.017 | 0.1126 | -0.317 | 0.2347 | -0.359 | 0.1924 | 0.271  | -0.229 | -0.531 | 0.092  | -0.105 |
| PCHAS_040710 | 0.6799 | 0.5531 | -0.547 | 0.5743 | 0.332  | 0.1831 | 0.1724 | 0.4527 | 0.3589 | 0.279  | -0.399 | 0.2605 |
| PCHAS_082080 | -0.153 | 0.402  | 0.4803 | 0.8038 | 0.1737 | -0.38  | -0.054 | -0.239 | -0.277 | -1.172 | -0.995 | -0.904 |
| PCHAS_062430 | 1.0677 | 0.451  | 0.5841 | 0.3498 | 0.1344 | -0.421 | 0.3578 | 0.6816 | -0.316 | -0.761 | 0.0402 | -0.434 |
| PCHAS_102300 | 0.0489 | -0.075 | 0.03   | -0.121 | -0.091 | -0.028 | 0.5813 | 0.517  | 0.0571 | 0.3396 | 0.5907 | 0.1634 |
| PCHAS_031470 | -1.124 | -0.42  | 0.1967 | -0.103 | 0.1583 | 0.0421 | -0.082 | -0.609 | -0.593 | -0.255 | -0.767 | -0.103 |
| PCHAS_090030 | 0.3659 | 0.7556 | 0.4437 | 1.0044 | 0.0399 | 0.4909 | 0.0874 | 0.3861 | 0.5636 | 0.4602 | -0.346 | 0.9513 |
| PCHAS_120990 | -0.767 | -0.048 | 0.156  | 0.1624 | 0.151  | -0.061 | 0.604  | 0.7223 | -0.305 | -0.015 | 0.4015 | -0.041 |
| PCHAS_020870 | -0.014 | -0.209 | 0.3105 | -0.286 | 0.2774 | -0.73  | -0.442 | -0.054 | -0.454 | -0.337 | -0.025 | -0.065 |
| PCHAS_143500 | 0.7312 | 0.1329 | 0.0946 | 0.3925 | 0.1373 | -0.264 | 0.1192 | 0.0358 | -0.367 | 0.7071 | 0.8023 | 0.8655 |
| PCHAS_040080 | 0.3777 | -0.097 | 0.8349 | -0.143 | 0.2788 | 0.1094 | -0.418 | 0.1513 | -0.091 | 0.4699 | 0.0725 | -0.227 |
| PCHAS_041400 | -0.372 | 0.7461 | 0.6041 | 0.0557 | 0.0344 | 0.4509 | -0.22  | -0.399 | 0.0654 | 0.0421 | 0.1179 | 0.0467 |
| PCHAS_141560 | 0.2755 | -1.2   | -0.901 | -1.26  | -0.295 | -0.067 | -0.544 | -0.017 | 0.0293 | 1.611  | 2.0383 | 1.2348 |
| PCHAS_060690 | 0.6139 | -0.297 | 1.2947 | -0.083 | 0.1818 | -0.305 | 0.3674 | 0.3081 | 0.0025 | -0.002 | 0.0897 | 0.1269 |
| PCHAS_101920 | 0.5689 | 0.7252 | 0.5766 | 0.2202 | 0.386  | 0.4478 | -0.238 | -0.371 | 0.1436 | -1.21  | -0.782 | -0.34  |
| PCHAS_080570 | 0.2823 | 0.1246 | -0.095 | -0.058 | -0.269 | -0.161 | 0.3019 | -0.045 | -0.217 | -0.687 | -0.178 | -0.489 |
| PCHAS_131520 | 0.995  | 0.3474 | 0.8211 | 0.3654 | 0.4134 | -0.027 | 0.4273 | 0.9209 | 0.1707 | 0.3766 | 0.2022 | 0.576  |
| PCHAS_132950 | -0.717 | -0.188 | 0.2582 | -0.563 | -9E-04 | -0.289 | -0.516 | 0.6201 | -0.655 | 0.0611 | -0.004 | 0.2018 |
| PCHAS_145270 | -0.348 | 0.4523 | 0.4189 | 0.1419 | 0.0979 | -0.349 | -0.353 | -0.079 | 0.0433 | 0.0841 | -0.097 | 0.2326 |
| PCHAS_011320 | -0.457 | 0.59   | 0.7108 | 0.3758 | 0.2664 | 0.5855 | -0.352 | 0.5405 | 0.7948 | 0.8842 | -0.183 | 0.5726 |
| PCHAS_070390 | 0.2756 | 0.5022 | 0.6945 | 0.424  | -0.15  | 0.4229 | 0.3894 | 0.1607 | 0.3899 | -0.718 | 0.2052 | 0.168  |
| PCHAS_111390 | 0.9935 | 0.5382 | 0.8368 | 0.1674 | -0.022 | -0.301 | 0.7273 | 0.3717 | -0.076 | -0.164 | 0.3384 | 0.1878 |
| PCHAS_134270 | -0.3   | -0.561 | -0.177 | -0.199 | 0.1139 | 0.2154 | 0.4532 | 0.2314 | 0.2256 | -0.087 | 1.9935 | 0.1686 |
| PCHAS_101630 | -0.534 | -0.405 | 0.4665 | -0.326 | 0.0613 | -0.16  | 0.0987 | -0.629 | -0.043 | -0.193 | -0.134 | 0.1538 |
| PCHAS_142180 | 0.158  | 0.1055 | -0.105 | -0.252 | -0.138 | -0.333 | -0.099 | -0.102 | -0.117 | 0.4175 | 0.1876 | 0.4863 |
| PCHAS_072870 | -0.483 | 0.1482 | -0.106 | 0.4647 | 0.2142 | -4E-04 | -0.099 | -0.121 | 0.1456 | -0.318 | -0.083 | 0.22   |
| PCHAS_141950 | 1.3632 | 0.362  | 0.9145 | 0.3135 | -0.124 | 0.0302 | -0.766 | 0.2777 | 0.1596 | 0.0797 | -0.161 | -0.023 |
| PCHAS_134880 | 0.6292 | 0.0549 | 0.7931 | -0.08  | 0.123  | -0.285 | 0.6565 | 0.0622 | -0.009 | -0.54  | 0.2998 | -0.202 |
| PCHAS_001100 | 2.1252 | 0.7268 | 0.2222 | 0.3779 | 0.0115 | 0.9575 | 0.8741 | 0.6366 | 1.2212 | -0.417 | 0.0182 | 0.5625 |
| PCHAS_113830 | 0.5972 | -0.305 | 0.0117 | -0.271 | -0.015 | 0.8321 | -0.731 | -0.465 | 0.3034 | 1.7386 | 1.143  | 1.1436 |

|              |        |        |        |        |        |        |        |        |        |        |        |        |
|--------------|--------|--------|--------|--------|--------|--------|--------|--------|--------|--------|--------|--------|
| PCHAS_132340 | -0.558 | 0.4484 | 0.7853 | 0.1611 | -0.038 | -0.144 | -0.345 | -0.364 | -0.053 | -0.598 | -0.73  | -0.236 |
| PCHAS_122820 | -1.193 | -0.003 | -0.189 | -0.361 | 0.4985 | -0.384 | -0.422 | 0.219  | -0.615 | -0.593 | -0.438 | -0.078 |
| PCHAS_081100 | 0.868  | -0.477 | 0.3883 | -0.222 | 0.117  | 0.0972 | 1.4792 | 0.1019 | -0.061 | -0.099 | 0.404  | -0.328 |
| PCHAS_136450 | 0.4836 | -0.176 | 0.2822 | -0.534 | -0.166 | -0.934 | 0.6933 | 0.255  | -0.634 | -0.021 | 0.5327 | 0.055  |
| PCHAS_146490 | -0.7   | 0.7038 | 0.1771 | 0.2203 | 0.276  | -0.328 | -0.3   | -0.181 | -0.103 | -0.378 | -0.418 | -0.258 |
| PCHAS_041060 | 0.4696 | -0.136 | 0.1241 | -0.353 | 0.147  | -0.528 | 0.495  | 0.3808 | -0.204 | -0.321 | 0.1641 | -0.192 |
| PCHAS_121890 | -0.426 | 0.1056 | 0.0142 | 0.1557 | 0.4292 | 0.0924 | 0.0173 | -0.441 | 0.1118 | -0.722 | -0.933 | -0.557 |
| PCHAS_133740 | -0.363 | 0.0979 | 0.1914 | 0.1366 | 0.1675 | 0.3303 | -0.029 | 0.1473 | 0.1758 | -0.108 | 0.0156 | 0.2578 |
| PCHAS_030470 | 0.016  | 0.0542 | -0.635 | 0.1036 | 0.0199 | -0.079 | 0.1627 | -0.112 | -0.071 | -0.099 | -0.215 | 0.0291 |
| PCHAS_062240 | 0.389  | 0.0546 | 0.1125 | -0.063 | 0.172  | -0.064 | 0.7461 | 0.233  | -0.133 | -0.044 | 0.2048 | -0.1   |
| PCHAS_051210 | 0.1326 | -0.046 | 0.3284 | 0.1095 | 0.2592 | -0.196 | -0.213 | 0.5696 | 0.1515 | 0.4955 | 0.0806 | 0.2632 |
| PCHAS_031480 | 1.8825 | 0.3453 | 0.3403 | 0.5064 | -0.088 | 0.7721 | 0.3199 | 0.4992 | 1.3301 | -1.198 | 0.2899 | 1.0525 |
| PCHAS_102340 | 0.1478 | 0.1202 | 0.6459 | 0.3285 | 0.0063 | -0.054 | 0.132  | 0.5439 | 0.0655 | -0.331 | 0.0191 | -0.032 |
| PCHAS_143650 | 1.1516 | -0.182 | 1.0729 | -0.442 | 0.0737 | -0.411 | 0.3298 | -0.102 | -0.279 | -2.08  | -0.481 | -0.587 |
| PCHAS_051800 | -1.121 | -1.954 | -0.706 | -0.425 | -0.871 | -0.602 | -0.397 | 0.2354 | -0.537 | -1.015 | -0.916 | -1.192 |
| PCHAS_135920 | -0.561 | 0.2289 | 0.3088 | -0.221 | 0.0429 | -0.359 | -0.235 | -0.483 | -0.309 | -0.096 | 0.212  | -0.182 |
| PCHAS_080710 | 0.7279 | 0.0683 | 0.2106 | 0.1221 | 0.0154 | 0.1537 | -0.682 | -0.437 | 0.1944 | -0.101 | -0.24  | -0.003 |
| PCHAS_124160 | 0.2378 | -0.619 | -2.684 | 0.3522 | -1.624 | -0.335 | -0.631 | -1.76  | -0.046 | 0.4404 | 0.7759 | 0.5684 |
| PCHAS_041830 | 0.6067 | 1.033  | 0.7503 | 0.8003 | 0.1012 | 0.7033 | 0.2943 | 0.6522 | 1.4959 | -0.039 | -0.544 | -0.03  |
| PCHAS_123320 | -0.736 | -0.445 | 0.7139 | -0.332 | -0.01  | -0.553 | 0.1865 | 0.2921 | -0.51  | -0.552 | -0.008 | -0.009 |
| PCHAS_050300 | 0.282  | 0.6902 | -0.373 | 0.1936 | 0.1381 | -0.207 | -0.369 | -0.051 | 0.0283 | 0.3726 | -0.037 | -0.12  |
| PCHAS_092060 | 0.1641 | 0.9306 | 0.5902 | 0.0573 | 0.235  | 0.2917 | 1.0388 | 0.0832 | 0.1446 | -0.912 | 0.2409 | -0.095 |
| PCHAS_080020 | 0.1273 | 0.7036 | 0.9217 | 0.5774 | 0.1401 | 0.6319 | 0.1836 | 0.4911 | 0.5923 | 0.6278 | 0.0654 | 0.2816 |
| PCHAS_060800 | -0.021 | -0.278 | -0.067 | 0.2822 | 0.0612 | -0.277 | 1.0517 | 0.5391 | -0.055 | 0.5667 | 0.3897 | 0.5094 |
| PCHAS_135950 | 0.7163 | -0.581 | 0.3369 | -0.208 | 0.031  | 0.0407 | 1.4955 | 0.4149 | 0.3078 | -0.121 | 0.5363 | -0.199 |
| PCHAS_130910 | -0.477 | -0.397 | -0.628 | -0.255 | 0.1688 | 0.1736 | 0.6939 | 0.3829 | 0.1169 | -0.023 | -4E-04 | -0.1   |
| PCHAS_143350 | 1.1134 | 0.4885 | -0.274 | 0.5165 | 0.2215 | 0.1057 | 0.2576 | 0.988  | 0.3261 | -0.026 | -0.176 | 0.6818 |
| PCHAS_052170 | -0.538 | 0.0116 | 0.6786 | 0.1902 | 0.0431 | 0.2815 | 0.1726 | 0.044  | -0.013 | -0.025 | 0.0718 | 0.1312 |
| PCHAS_123630 | 0.501  | 0.4945 | 0.3674 | 0.3955 | 0.1627 | 0.5203 | -0.148 | 0.1659 | 0.3556 | -0.305 | 0.0476 | 0.383  |
| PCHAS_103980 | -0.237 | -0.143 | 0.2976 | 0.0297 | 0.3566 | -0.177 | 0.0281 | -0.241 | -0.374 | -1.138 | -0.548 | -0.494 |
| PCHAS_142930 | 0.0766 | 0.308  | 0.6189 | -0.295 | 0.1087 | -0.359 | 1.927  | -0.111 | -0.344 | 0.2923 | 0.0927 | -0.11  |
| PCHAS_110850 | -0.776 | -0.789 | 0.4671 | -0.652 | -0.083 | -0.905 | -0.434 | 0.2673 | -0.781 | -0.01  | 0.0083 | -0.207 |
| PCHAS_136750 | -0.259 | -0.364 | 0.0946 | -0.29  | -0.463 | -0.037 | 0.2921 | 0.0473 | -0.082 | -0.706 | -0.466 | -1.035 |
| PCHAS_134070 | 0.3965 | -0.038 | -2.022 | 0.5597 | -1.496 | 1.1661 | 1.0236 | -0.408 | 0.2446 | 0.7516 | 0.3235 | 0.5245 |
| PCHAS_100260 | -0.401 | -0.348 | 0.5102 | -0.188 | -0.087 | -0.463 | 0.6082 | -0.095 | -0.209 | 0.4961 | -0.06  | -0.054 |
| PCHAS_145500 | 1.6116 | 0.1743 | 0.6255 | 0.4887 | 0.0839 | 0.8894 | 1.1579 | -0.035 | 0.585  | 0.2509 | 0.1405 | 0.2156 |
| PCHAS_071720 | -0.814 | -0.316 | -0.45  | 0.0363 | -0.074 | -0.081 | 0.4471 | 0.0881 | 0.244  | 0.0458 | 0.1518 | 0.4731 |
| PCHAS_072030 | 1.8647 | 0.1322 | 0.8904 | 0.458  | 0.0978 | 1.5327 | 0.579  | 0.4456 | 0.2177 | 0.169  | 0.0152 | 0.5647 |
| PCHAS_041620 | 0.3085 | 0.4341 | 0.3809 | 0.323  | 0.2555 | -0.06  | -0.12  | 0.134  | -0.108 | -0.075 | -0.042 | 0.0936 |
| PCHAS_120300 | -0.341 | 0.8835 | 0.5692 | 0.8668 | 0.3448 | 0.9111 | -1.017 | 0.8978 | 0.9087 | 0.4901 | 0.0564 | 0.9267 |
| PCHAS_070130 | 0.7836 | 0.3731 | 0.2471 | -0.04  | 0.0101 | 0.613  | 1.3057 | 0.9851 | 0.2782 | 0.1166 | 0.1765 | 0.4442 |
| PCHAS_136500 | 0.293  | 0.4886 | 0.0079 | 0.3491 | 0.1188 | 0.0872 | -0.65  | -0.14  | -0.2   | 0.0765 | -0.269 | 0.0045 |
| PCHAS_141920 | -0.637 | 0.9172 | 0.532  | 0.0528 | 0.009  | 0.0119 | -0.591 | -0.278 | 0.4844 | 0.0268 | 0.2348 | -0.028 |
| PCHAS_080660 | 0.5926 | -0.758 | 0.3265 | -0.748 | -0.079 | -1.058 | 1.1768 | 0.6957 | -0.527 | -0.583 | 0.0417 | -1.011 |
| PCHAS_133230 | 0.1732 | -2E-04 | 0.2313 | 0.3835 | 0.0103 | 0.6493 | 0.2557 | -0.325 | 0.6529 | -0.607 | -0.067 | -0.446 |
| PCHAS_051100 | 0.5661 | -0.149 | -1.859 | 0.6658 | -1.023 | 1.3957 | 0.7394 | -0.558 | 1.5967 | 0.1431 | 2.1185 | 0.654  |
| PCHAS_110990 | -0.112 | 0.4825 | 0.8326 | 0.4046 | 0.1189 | 0.5238 | 0.7278 | 0.1129 | 0.6663 | 0.3221 | 0.1072 | 0.4032 |
| PCHAS_051900 | -0.123 | 0.5559 | 0.2612 | 0.5291 | 0.278  | 0.5464 | 0.0265 | 0.1099 | 0.3525 | -0.001 | -0.347 | 0.027  |
| PCHAS_102650 | 0.0808 | -1.074 | 0.3893 | -0.928 | -0.132 | -1.239 | 0.5182 | 0.3333 | -0.537 | -0.958 | 0.4515 | -1.122 |
| PCHAS_123790 | 0.1841 | 0.1115 | 0.7795 | 0.2768 | 0.0522 | 0.559  | -1.313 | -0.247 | -0.043 | -0.542 | -0.579 | -0.645 |

|              |        |        |        |        |        |        |        |        |        |        |        |        |
|--------------|--------|--------|--------|--------|--------|--------|--------|--------|--------|--------|--------|--------|
| PCHAS_135400 | 0.2275 | 0.2598 | 0.1847 | 0.2343 | 0.0927 | 0.4935 | 0.0851 | 0.3668 | 0.1685 | -0.169 | 0.0861 | -0.115 |
| PCHAS_130630 | 0.5061 | 0.4992 | 0.2459 | 0.044  | -0.153 | -0.088 | -0.54  | -0.226 | -0.237 | -0.609 | -0.309 | -0.031 |
| PCHAS_142280 | -0.541 | -0.521 | 0.6281 | -0.729 | -0.034 | -1.24  | 1.2796 | 0.1305 | -0.6   | 0.3159 | -0.018 | 0.1923 |
| PCHAS_123650 | 0.1653 | 0.0019 | 0.0506 | 0.4512 | 0.171  | 0.2582 | 0.2045 | 0.5322 | 0.1482 | -0.131 | -0.165 | 0.1667 |
| PCHAS_111780 | 0.1372 | 0.0582 | -2.249 | 0.3686 | -0.754 | 0.1556 | 0.1134 | -0.375 | 0.2559 | 0.4071 | 0.1331 | 0.4509 |
| PCHAS_052030 | -0.4   | -0.046 | -0.038 | -0.09  | 0.1935 | -0.685 | 0.0562 | 0.0754 | -0.091 | 0.1213 | 0.1624 | 0.039  |
| PCHAS_136780 | -0.58  | 1.0831 | 1.0613 | 0.7864 | 0.2151 | 0.3531 | -0.186 | 0.4855 | 0.7861 | 0.6113 | 0.1142 | 0.5543 |
| PCHAS_133370 | -0.165 | -0.909 | 0.3836 | -0.639 | 0.058  | -0.687 | -0.478 | 0.2188 | -0.421 | 0.1504 | 1.0771 | 0.4076 |
| PCHAS_030690 | -0.344 | -0.4   | -0.437 | -0.21  | 0.4591 | 0.0292 | 0.4007 | -0.287 | 0.0447 | -0.554 | -0.157 | 0.0373 |
| PCHAS_144500 | -0.218 | 0.1326 | 0.1959 | -0.014 | 0.1702 | -0.239 | 0.0796 | 0.1326 | -0.351 | -0.389 | 0.1048 | -0.224 |
| PCHAS_111460 | -0.09  | 0.1753 | 0.3648 | 0.24   | 0.1649 | 0.5325 | 0.7446 | -0.175 | 0.5907 | -1.116 | -0.614 | 0.094  |
| PCHAS_141990 | 0.1036 | 0.4658 | 0.5817 | 0.1699 | 0.2364 | 0.7538 | 1.1018 | 0.2714 | 0.852  | -0.07  | 0.1262 | 0.3967 |
| PCHAS_030650 | 0.977  | 0.5435 | 0.8408 | 0.1635 | 0.1713 | 0.2884 | -0.774 | 0.2794 | 0.2545 | -0.081 | 0.3196 | 0.1863 |
| PCHAS_144580 | -0.222 | 1.7517 | -0.87  | 0.6976 | 0.1409 | 0.634  | -0.045 | -0.754 | 0.1763 | 0.5548 | 0.2305 | -0.198 |
| PCHAS_080040 | 0.7713 | 0.32   | -0.347 | -0.075 | -0.102 | -0.187 | -0.35  | -0.227 | -0.345 | -0.73  | -0.233 | 0.1888 |
| PCHAS_133830 | -0.063 | -0.565 | 0.5422 | -0.462 | 0.1911 | -0.535 | -0.002 | 0.0739 | -0.436 | -0.784 | 0.241  | -0.548 |
| PCHAS_121880 | 0.078  | -0.412 | 0.2585 | -0.448 | 0.0841 | -0.463 | -0.126 | -0.228 | -0.328 | -0.486 | 0.201  | -0.243 |
| PCHAS_010950 | 0.7343 | -0.696 | -0.198 | -0.288 | -0.461 | -0.549 | 1.1413 | 0.3486 | -0.359 | 0.1003 | 0.2579 | -1.054 |
| PCHAS_103540 | -0.087 | 0.1716 | 0.5646 | 0.3929 | 0.2272 | 0.2049 | -0.32  | -0.149 | 0.0834 | 0.0415 | -0.204 | -0.095 |
| PCHAS_103120 | 0.7666 | 0.346  | 0.6612 | 0.4304 | 0.1425 | 0.4619 | 0.1531 | -0.209 | 0.5193 | -0.357 | 0.2048 | 0.0582 |
| PCHAS_070780 | 1.4769 | 0.1418 | 0.471  | -0.097 | -0.558 | -0.821 | 1.0685 | 1.1897 | -0.621 | -0.08  | 0.5561 | -1.46  |
| PCHAS_031020 | 0.422  | -0.097 | -2.451 | 0.6079 | -1.573 | 0.6549 | 0.6693 | -0.679 | 0.2961 | 0.1745 | -0.287 | 0.7599 |
| PCHAS_101160 | 1.1941 | 1.4597 | 0.5664 | 0.8461 | 0.076  | -0.519 | 0.3828 | 0.6056 | 0.4437 | -0.212 | -0.045 | 0.3349 |
| PCHAS_132550 | 0.8934 | 0.0766 | 0.3978 | 0.4107 | 0.2684 | 0.3307 | 0.2938 | 0.7622 | 0.307  | -0.217 | 0.0161 | 0.1662 |
| PCHAS_072900 | 0.9227 | -0.758 | 0.5539 | -0.051 | 0.1963 | -0.984 | 0.592  | 0.7779 | -0.758 | -0.652 | 0.4752 | -0.849 |
| PCHAS_146230 | -0.978 | -1.078 | -0.287 | -0.269 | 0.0336 | -0.129 | 0.4518 | 0.1401 | -0.242 | -0.362 | -0.52  | -0.652 |
| PCHAS_082350 | 0.7807 | -0.104 | 0.148  | 0.0494 | -0.056 | 0.1123 | 1.3461 | -0.149 | 0.233  | -0.514 | 0.2664 | -0.318 |
| PCHAS_070450 | -0.44  | -1.108 | 0.5347 | -0.124 | -0.14  | -0.316 | -0.805 | -0.028 | -0.991 | 0.1513 | 0.089  | 0.3455 |
| PCHAS_090050 | -0.498 | 0.824  | 0.5161 | 0.458  | 0.1495 | 0.8211 | 0.2314 | -0.151 | 0.706  | -0.004 | -0.007 | 0.2223 |
| PCHAS_093070 | 0.1583 | 0.1454 | 0.8117 | 0.4463 | 0.047  | 1.0563 | -0.211 | -0.507 | 0.8248 | -1.209 | -0.589 | -0.593 |
| PCHAS_144720 | -0.258 | -0.562 | 0.2727 | 0.3087 | 0.1659 | -0.585 | 0.8493 | 0.2799 | -0.185 | 0.2756 | 0.4734 | 0.9211 |
| PCHAS_133770 | -0.341 | 0.4069 | 0.5316 | 0.1436 | 0.1251 | -0.095 | -0.587 | 0.0206 | -0.014 | -0.038 | -0.156 | 0.0848 |
| PCHAS_102000 | 0.3248 | 0.6359 | 0.7635 | 0.4166 | -0.058 | 0.4051 | -0.572 | -0.065 | -0.155 | 0.0415 | 0.1907 | 0.1722 |
| PCHAS_021090 | 0.3967 | 0.4021 | 0.4436 | 0.4298 | -0.139 | 0.4782 | -0.774 | -0.83  | 0.0869 | -0.623 | -0.379 | -0.563 |
| PCHAS_136680 | 0.0966 | 0.9489 | 1.1982 | 0.1415 | 0.8591 | -0.001 | -0.182 | -0.47  | 0.1301 | -0.39  | -0.07  | -0.085 |
| PCHAS_050790 | 0.3649 | -0.056 | 0.5806 | 0.1427 | -0.244 | 0.594  | -0.144 | -0.374 | 0.3068 | -0.671 | 0.1201 | -0.534 |
| PCHAS_010350 | -0.532 | 1.0755 | 1.0219 | 1.0418 | 0.2946 | 0.7629 | 0.1789 | -0.297 | 0.7078 | -1.237 | -1.117 | 0.0779 |
| PCHAS_071830 | 1.098  | 1.2327 | -0.222 | 0.7706 | -0.522 | 0.7829 | 0.6365 | 0.6084 | 0.9393 | 0.2808 | -0.038 | 0.8022 |
| PCHAS_093540 | -0.311 | 0.3302 | 0.1232 | 0.36   | -0.044 | -0.45  | 0.1263 | -0.268 | -0.291 | -0.729 | -0.914 | -0.426 |
| PCHAS_111470 | -0.423 | -1.479 | 0.7995 | 0.4301 | 0.1638 | 0.6537 | -0.113 | -0.205 | 0.3674 | -0.681 | -0.554 | -0.051 |
| PCHAS_080550 | 0.5622 | -0.525 | 0.3524 | -0.081 | 0.314  | -0.529 | 0.6787 | 0.1667 | -0.432 | -0.732 | 0.284  | -0.689 |
| PCHAS_136210 | 0.4098 | -0.521 | 0.304  | 0.2906 | 0.3893 | -0.063 | 1.1005 | 0.3291 | -0.04  | -0.923 | -0.446 | -0.908 |
| PCHAS_080010 | -0.511 | 0.2822 | 0.6369 | 0.3944 | 0.2904 | 0.8623 | -0.456 | 0.524  | 0.4594 | 0.0239 | -0.056 | 0.5189 |
| PCHAS_090230 | -0.094 | -0.324 | 0.0823 | -0.115 | -0.18  | 1.333  | -1.268 | -0.072 | 0.531  | 2.4523 | 1.2758 | 1.5734 |
| PCHAS_091960 | -0.251 | 0.0051 | -0.206 | 0.4099 | 0.2575 | 0.1642 | 0.0311 | -0.179 | 0.0605 | -0.921 | -1.131 | -1.095 |
| PCHAS_100670 | 0.0553 | 0.5793 | 0.2242 | 0.0874 | 0.1962 | -0.461 | -0.451 | -0.087 | 0.4818 | 0.0908 | -0.233 | -0.088 |
| PCHAS_092760 | 0.4568 | -0.585 | -0.098 | -0.356 | -0.144 | -0.473 | 0.5301 | 0.7926 | -0.131 | 0.5662 | 0.7286 | 0.2869 |
| PCHAS_145160 | 0.102  | 0.0345 | 0.0099 | 0.0876 | 0.1705 | -0.33  | -0.261 | 0.1736 | -0.514 | 0.4177 | 0.016  | 0.3403 |
| PCHAS_020640 | -1     | -0.788 | 0.0145 | -1.055 | -0.108 | 0.2197 | 1.6242 | 1.026  | 0.1468 | 1.3625 | 1.2821 | 0.4841 |
| PCHAS_083190 | 0.7383 | -0.299 | 0.3052 | -0.026 | 0.0501 | -0.015 | 0.9099 | -0.303 | 0.1592 | -0.487 | 0.1585 | -0.337 |

|              |        |        |        |        |        |        |        |        |        |        |        |        |
|--------------|--------|--------|--------|--------|--------|--------|--------|--------|--------|--------|--------|--------|
| PCHAS_010150 | 0.8603 | 0.2659 | 0.4091 | 0.7214 | 0.1154 | 0.005  | -0.156 | 0.2696 | 0.0439 | -0.455 | -0.07  | -0.421 |
| PCHAS_141540 | 0.3766 | -0.199 | 0.3148 | -0.048 | 0.0064 | -0.286 | 1.4636 | 0.0544 | -0.098 | -0.222 | 0.3225 | 0.0055 |
| PCHAS_060880 | -0.593 | -0.461 | 0.0531 | -0.41  | -0.029 | -0.612 | -0.106 | -0.118 | -0.636 | -0.346 | 0.0677 | -0.314 |
| PCHAS_143900 | -0.751 | -0.46  | -0.399 | 0.12   | 0.3045 | 0.1747 | 0.6689 | 0.2804 | 0.1429 | 0.0239 | -0.399 | -0.142 |
| PCHAS_123380 | -0.322 | -0.851 | 0.376  | 0.0441 | 0.1246 | 0.5892 | -1.476 | -0.066 | -0.262 | -0.659 | -0.62  | -0.285 |
| PCHAS_137060 | 1.54   | 1.5101 | 0.7534 | 0.1532 | -0.279 | 0.1286 | 0.5513 | 0.5375 | 0.1646 | 0.2372 | 0.2158 | 0.0401 |
| PCHAS_021300 | 0.6744 | 0.6134 | 0.4264 | -0.376 | 0.0556 | 0.4895 | 0.2292 | 0.0022 | 0.1793 | 0.2977 | 0.2348 | 0.6249 |
| PCHAS_082580 | -0.235 | -0.066 | 0.2189 | 0.5647 | 0.2267 | 0.6742 | -0.072 | 0.6539 | 0.9091 | 0.7612 | 0.2213 | 0.472  |
| PCHAS_070970 | 0.1985 | 0.138  | 0.4235 | 0.3553 | 0.0036 | 0.0358 | 0.2583 | -0.019 | 0.3715 | 0.0004 | -0.049 | -0.153 |
| PCHAS_061400 | -0.563 | 0.2174 | 0.2416 | 0.0196 | 0.045  | -0.365 | -0.849 | -0.584 | -0.547 | -0.381 | -0.819 | -0.654 |
| PCHAS_114290 | 0.0569 | -0.276 | 0.2025 | 0.0118 | 0.0915 | 0.3044 | 0.1197 | 0.854  | 0.0435 | 0.4028 | 0.3581 | 0.8649 |
| PCHAS_144670 | 0.6931 | -0.065 | 0.1782 | -0.07  | 0.0453 | -0.255 | 0.6803 | -0.077 | -0.035 | 0.834  | 1.1354 | 0.8349 |
| PCHAS_144150 | 0.4914 | 0.6244 | 0.6507 | 0.1562 | 0.3164 | -0.737 | 0.1453 | 0.1359 | -0.414 | -0.302 | 0.2144 | -0.291 |
| PCHAS_050020 | -0.887 | -0.183 | 0.1765 | 0.6117 | 0.2242 | 0.4671 | 1.6334 | 0.6163 | 0.335  | 0.1576 | -0.365 | -0.113 |
| PCHAS_111480 | -0.349 | -0.267 | 0.3012 | -0.113 | 0.3182 | -0.419 | 0.2134 | -0.079 | -0.382 | -0.482 | 0.001  | 0.1038 |
| PCHAS_040520 | 0.7079 | 0.381  | 0.2239 | -0.009 | 0.1908 | -0.461 | -0.553 | 0.0387 | -0.406 | -0.57  | -0.154 | -0.447 |
| PCHAS_101430 | -0.366 | 0.7857 | 0.6111 | 0.298  | 0.0024 | -0.186 | -0.016 | -0.539 | -0.171 | -0.201 | 0.0116 | 0.0195 |
| PCHAS_113760 | 0.6016 | -0.208 | 0.555  | 0.1649 | -0.091 | 0.4786 | -1.159 | -0.065 | -0.461 | 0.1406 | -0.107 | 0.146  |
| PCHAS_145780 | 0.2247 | -0.203 | -0.257 | -0.156 | 0.1163 | -0.15  | 0.3661 | 0.2197 | -0.052 | -0.563 | -0.051 | -0.449 |
| PCHAS_093750 | 0.1727 | 1.1041 | 0.7332 | -0.081 | 0.1296 | 0.7862 | 1.0946 | 0.5507 | 0.8544 | 1.0027 | 0.8416 | 0.8824 |
| PCHAS_060980 | -1.086 | -0.718 | 0.0799 | -0.305 | -0.105 | -0.057 | 0.8019 | -0.119 | -0.426 | -0.479 | -0.093 | -0.314 |
| PCHAS_100690 | -0.733 | 0.5139 | 0.3772 | 0.311  | 0.3485 | -0.317 | 0.0688 | -0.38  | -0.032 | -0.344 | -0.623 | -0.514 |
| PCHAS_113810 | 0.099  | -1.069 | 0.1238 | -0.102 | 0.1425 | 0.2822 | 0.5679 | -0.02  | 0.2036 | -0.431 | 0.2659 | -0.261 |
| PCHAS_073130 | -0.299 | 1.1621 | 0.6061 | 0.5485 | 0.156  | 0.5024 | 0.2948 | 0.7265 | 0.7334 | 0.5961 | -0.044 | 0.5787 |
| PCHAS_136020 | 0.1655 | 0.0346 | 0.069  | -0.177 | -0.209 | -0.591 | -0.595 | 0.2183 | -0.261 | 0.8689 | 0.9421 | 0.4749 |
| PCHAS_100930 | 0.3415 | -0.99  | -2.296 | 0.0888 | -0.582 | -0.96  | 0.6505 | -0.333 | -1.128 | -0.351 | 1.2078 | 0.0016 |
| PCHAS_140130 | 0.5296 | 0.2877 | 0.2795 | 0.532  | 0.0431 | -0.054 | 0.5652 | 0.5066 | 0.0695 | -0.344 | 0.0412 | -0.103 |
| PCHAS_142320 | 0.2102 | -0.441 | 0.7158 | -0.154 | 0.3669 | -0.852 | 0.534  | 0.1183 | -0.419 | -0.667 | 0.247  | -0.409 |
| PCHAS_145190 | -0.312 | 0.8089 | 0.7023 | -0.149 | 0.2024 | -0.084 | -0.565 | -0.458 | -0.007 | -0.315 | -0.005 | -0.206 |
| PCHAS_131650 | -0.578 | 0.0662 | 0.0259 | 0.4052 | 0.0107 | 0.0692 | -0.043 | 0.3446 | 0.0486 | -0.381 | -0.2   | 0.049  |
| PCHAS_011510 | -0.356 | -0.212 | -0.025 | -0.493 | -0.336 | -0.929 | 1.6926 | -0.101 | -0.856 | -0.53  | -0.009 | -0.254 |
| PCHAS_123170 | 0.556  | 0.3604 | -0.017 | 0.1889 | 0.0774 | -0.328 | -0.343 | 0.1064 | -0.356 | 0.1337 | 0.2856 | 0.1267 |
| PCHAS_030390 | 0.0777 | -0.461 | 0.1886 | 0.2996 | 0.291  | -0.394 | 0.0921 | 0.7118 | -0.182 | -0.209 | 0.1043 | 0.0959 |
| PCHAS_071630 | 0.1968 | 0.0936 | -0.27  | 0.0776 | 0.1373 | -0.29  | -0.101 | 0.4365 | -0.404 | -0.192 | 0.0268 | 0.4486 |
| PCHAS_081390 | 0.9349 | -0.327 | -0.082 | -0.059 | 0.174  | -0.248 | 0.1705 | 0.6279 | -0.414 | -0.399 | 0.286  | 0.1187 |
| PCHAS_093240 | 0.0969 | -1.134 | -0.162 | -0.67  | -0.478 | -0.894 | -0.288 | -0.198 | -0.371 | -1.301 | -0.771 | -1.231 |
| PCHAS_136830 | -0.126 | -0.097 | 0.8484 | -0.258 | -0.149 | -0.72  | 0.9894 | 0.0041 | -0.746 | -0.692 | 0.2217 | -0.219 |
| PCHAS_140620 | 0.8782 | 0.3023 | 1.2553 | 0.2282 | 0.2108 | -0.532 | -0.067 | -0.095 | -0.237 | 1.0579 | 0.0464 | 0.1304 |
| PCHAS_131950 | -0.076 | 0.0477 | -0.098 | 0.0607 | 0.0292 | 0.3615 | 0.4166 | 0.0325 | -0.098 | 0.1723 | 0.3852 | -0.033 |
| PCHAS_142110 | 0.0814 | -0.23  | 0.2713 | 0.0327 | 0.127  | 0.091  | -0.059 | 0.116  | -0.353 | -0.01  | -0.097 | 0.102  |
| PCHAS_141860 | 0.2596 | -0.314 | -0.661 | 0.1685 | 0.0855 | 0.2676 | 0.0632 | 0.3589 | 0.0694 | 0.5751 | 0.5657 | 0.5007 |
| PCHAS_100720 | 0.1128 | 0.23   | 0.1902 | -0.589 | 0.0918 | -0.402 | 0.1247 | -0.322 | -0.315 | -0.917 | 0.0502 | -0.713 |
| PCHAS_020750 | 0.6056 | 0.5845 | 0.048  | -0.28  | 0.0302 | -0.599 | -0.233 | -0.129 | -0.43  | 0.3338 | 0.3447 | 0.0998 |
| PCHAS_140610 | -0.227 | -0.468 | -0.342 | -0.269 | 0.1053 | -0.43  | 0.4371 | 0.4866 | -0.2   | 0.7445 | 0.7138 | 1.1228 |
| PCHAS_145350 | -0.328 | 0.559  | 0.8128 | 0.1826 | 0.3068 | 0.0511 | -0.829 | 0.0629 | 0.2945 | -0.531 | 0.0289 | -0.151 |
| PCHAS_146240 | -0.953 | 0.2626 | 0.4402 | 0.238  | 0.1544 | 0.3751 | 0.1811 | 0.3376 | -0.4   | 0.1941 | -0.181 | 0.5145 |
| PCHAS_060110 | 1.1439 | 0.6687 | 0.6508 | 0.4085 | 0.0648 | 1.1964 | 1.4518 | 0.2787 | 0.8537 | 0.3845 | 0.0377 | 0.0805 |
| PCHAS_123910 | -0.57  | -1.036 | -0.414 | 0.3961 | -0.887 | 0.0133 | -0.672 | -0.012 | -0.482 | 0.1134 | 0.8756 | 0.5118 |
| PCHAS_090200 | 0.36   | 0.473  | 0.5418 | 0.1295 | 0.3936 | 0.1915 | -0.036 | 0.1858 | 0.0507 | -0.309 | -0.091 | -0.086 |
| PCHAS_031030 | 2.0574 | 1.3929 | 0.2879 | 1.3268 | -0.12  | 1.3042 | 1.8204 | 1.7296 | 1.9488 | 0.8651 | 0.9673 | 1.8489 |

|              |        |        |        |        |        |        |        |        |        |        |        |        |
|--------------|--------|--------|--------|--------|--------|--------|--------|--------|--------|--------|--------|--------|
| PCHAS_082050 | 0.7985 | 0.7164 | 1.3973 | 0.2436 | 0.3603 | -0.066 | -0.172 | 0.1442 | -0.244 | -1.204 | 0.0432 | -0.054 |
| PCHAS_021010 | -0.695 | 0.4665 | 0.2727 | 0.0457 | 0.0177 | -0.121 | 0.1872 | 0.1617 | -0.083 | 0.184  | 0.201  | 0.2325 |
| PCHAS_102380 | 1.6345 | -0.607 | 0.0749 | 0.0222 | 0.1774 | 0.3402 | 0.3627 | 0.1961 | 0.0786 | 0.384  | -0.041 | -0.142 |
| PCHAS_092000 | 1.8536 | 0.3395 | 0.5909 | -0.041 | 0.0751 | -0.891 | 0.2314 | 0.062  | -0.352 | -0.617 | 0.2507 | 0.0064 |
| PCHAS_136430 | 0.1067 | 0.5819 | -0.339 | 0.253  | 0.311  | 0.1733 | 0.7612 | -0.087 | 0.335  | 0.1953 | 0.0816 | -0.051 |
| PCHAS_134590 | 0.3386 | -0.727 | 0.2069 | -0.184 | 0.1312 | -0.652 | 0.3196 | 0.4402 | -0.269 | 0.1154 | 0.1405 | -0.09  |
| PCHAS_143800 | -0.067 | 0.6593 | 0.3016 | 0.3066 | -0.037 | 0.4363 | 1.209  | -0.016 | 0.3971 | -0.277 | 0.2085 | 0.6239 |
| PCHAS_121020 | 0.002  | 0.1468 | 0.5437 | 0.134  | 0.4543 | -0.287 | 0.0713 | -0.315 | -0.274 | -1.149 | -0.561 | -0.507 |
| PCHAS_090530 | 0.4521 | -1.06  | 0.1143 | -0.042 | 0.009  | -0.702 | 0.1049 | 0.3074 | 0.2542 | -0.258 | 0.2953 | 0.4464 |
| PCHAS_103230 | -0.248 | -0.466 | 0.7027 | -0.035 | -0.006 | -0.034 | 0.1229 | -0.129 | -0.229 | -0.214 | 0.1373 | -0.122 |
| PCHAS_142460 | 0.4776 | 0.2284 | -0.82  | 0.2599 | 0.1334 | 0.2406 | 0.6795 | 0.4496 | 0.4506 | -0.644 | -0.069 | 0.0523 |
| PCHAS_103060 | 0.1665 | -0.126 | 0.2775 | -0.136 | 0.0526 | -0.067 | 0.1764 | -0.103 | -0.13  | -0.899 | -0.362 | -1.089 |
| PCHAS_145620 | 0.327  | -0.815 | 0.5803 | -0.529 | -0.106 | -0.476 | 1.4364 | 0.9659 | -0.251 | -0.207 | 0.2783 | 0.1556 |
| PCHAS_144820 | 0.5284 | -0.521 | 0.6205 | -0.291 | 0.0899 | -0.528 | 0.573  | 0.3043 | -0.557 | -0.056 | 0.265  | 0.0374 |
| PCHAS_100210 | -0.376 | -0.423 | 0.3616 | -0.131 | 0.0835 | 0.151  | -0.038 | 0.291  | 0.0475 | -0.394 | -0.083 | -0.408 |
| PCHAS_070930 | -0.568 | 0.0041 | 0.2784 | 0.2067 | 0.2811 | 0.5829 | -0.543 | -0.371 | 0.2904 | -0.295 | -0.885 | -0.211 |
| PCHAS_093680 | -0.149 | -0.662 | 0.2825 | 0.0156 | -0.016 | -0.057 | -0.215 | -0.365 | -0.049 | -0.039 | -0.02  | 0.1848 |
| PCHAS_134420 | 0.9555 | 0.5467 | 0.8    | -0.089 | -0.134 | -0.163 | 0.5178 | -0.021 | 0.1062 | -0.008 | 0.177  | 0.5718 |
| PCHAS_101050 | -0.579 | -0.222 | 0.4174 | -0.089 | 0.277  | 0.0403 | 1.6444 | -0.135 | -0.121 | -0.766 | 0.0509 | -0.126 |
| PCHAS_072340 | -0.181 | -0.463 | 0.5444 | -0.674 | -0.218 | -1.084 | 1.4105 | -0.351 | -0.781 | -0.573 | -0.236 | -0.283 |
| PCHAS_061550 | -1.29  | 0.232  | 0.1068 | 0.0962 | -0.058 | 0.0639 | 0.1966 | -0.599 | 0.0049 | -0.022 | -0.399 | -0.65  |
| PCHAS_060230 | 0.0059 | 0.2207 | 0.3582 | 0.36   | 0.0649 | 0.3097 | -0.273 | 0.2425 | 0.3497 | -0.238 | -0.119 | -0.687 |
| PCHAS_051350 | -0.197 | 0.0718 | 0.445  | -0.132 | 0.1192 | -0.267 | 0.3248 | 0.3608 | 0.021  | -0.534 | 0.0967 | -0.522 |
| PCHAS_143530 | 0.2413 | -0.426 | -2.416 | 0.3219 | -0.839 | 1.2829 | 0.6872 | -0.157 | 0.8754 | 0.1601 | -0.071 | -0.133 |
| PCHAS_121040 | 0.1938 | -0.709 | 0.1758 | -0.289 | -0.006 | 0.2726 | 0.2188 | 0.6392 | 0.0588 | 0.6381 | 0.4251 | 0.3698 |
| PCHAS_062370 | 0.0467 | 0.3503 | -0.068 | 0.1984 | 0.0949 | -0.009 | 0.5617 | -0.394 | -0.183 | -0.17  | -0.129 | -0.159 |
| PCHAS_140580 | -0.64  | 0.1151 | -0.089 | -0.323 | -0.131 | -0.306 | -0.619 | -0.007 | 0.0004 | -0.213 | -0.705 | -0.322 |
| PCHAS_000980 | 1.9193 | 0.6153 | 1.0816 | -0.052 | -0.008 | 0.1398 | 0.4942 | 1.3033 | 0.1694 | 0.8925 | 0.2768 | 0.9928 |
| PCHAS_100390 | 0.2775 | -0.052 | 0.6675 | 0.0734 | 0.2107 | 0.1686 | 0.0194 | 0.1013 | 0.0849 | -0.218 | -0.021 | -0.235 |
| PCHAS_030080 | 1.6021 | 0.3273 | 0.7625 | 0.3832 | 0.1375 | 1.4403 | 0.4544 | 0.3684 | 0.4409 | 0.6174 | 0.1317 | 0.1083 |
| PCHAS_140790 | 0.0986 | -0.671 | -0.392 | -0.454 | -0.064 | -1.094 | -0.07  | -0.414 | -0.603 | 1.2868 | 2.0792 | 0.8006 |
| PCHAS_040420 | 0.3702 | -0.048 | -0.219 | -0.201 | 0.1246 | -0.939 | 0.2788 | 0.1077 | -0.757 | 0.1179 | 0.2894 | 0.2088 |
| PCHAS_061870 | 0.6152 | -0.439 | -0.034 | 0.2763 | 0.4416 | -0.472 | 0.6888 | 0.172  | -0.222 | -1.155 | -0.023 | -0.217 |
| PCHAS_093670 | -0.295 | -0.199 | 0.0494 | -0.704 | -0.168 | -0.452 | -0.327 | -0.233 | -0.89  | 0.8167 | 0.1678 | -0.261 |
| PCHAS_061140 | 0.0223 | 0.7748 | 0.7613 | 0.4431 | 0.1124 | 0.2884 | -0.576 | 0.5581 | 0.1255 | 0.4694 | 0.3707 | 0.5666 |
| PCHAS_083530 | 0.1256 | -0.8   | -0.063 | -0.26  | 0.5519 | -0.165 | 0.2065 | 0.5471 | 0.0228 | 0.3897 | 0.5157 | 0.3062 |
| PCHAS_093360 | 0.6778 | 0.6251 | 0.3993 | 0.62   | -0.104 | 1.0289 | 0.9109 | 1.3296 | 0.9135 | 1.3892 | 0.8646 | 1.6286 |
| PCHAS_010500 | 0.0993 | 0.0729 | -0.122 | 0.192  | -0.76  | -0.036 | -0.401 | 0.3854 | 0.0253 | -0.249 | -0.189 | -0.132 |
| PCHAS_120420 | -0.56  | 0.0739 | 0.5883 | 0.1707 | 0.0187 | 0.3529 | -0.502 | -0.033 | -0.111 | 0.6446 | -0.195 | 0.695  |
| PCHAS_020880 | 0.121  | -0.867 | -1.458 | 0.088  | 0.1179 | 0.5695 | 0.174  | 0.0559 | 0.5616 | 0.7521 | 0.2882 | 0.3004 |
| PCHAS_092280 | 0.9621 | 0.2502 | 0.7616 | 0.0416 | 0.3596 | 0.1616 | 0.6639 | 0.3198 | 0.5722 | -0.427 | 0.301  | -0.013 |
| PCHAS_073170 | -0.143 | -0.668 | -0.487 | -0.582 | 0.2139 | 0.9072 | 0.3477 | 1.0937 | 0.9378 | 0.1898 | -0.176 | -0.067 |
| PCHAS_135710 | -0.062 | 0.086  | -0.337 | 0.0823 | 0.0849 | 0.2632 | 0.1516 | 0.4012 | 0.2911 | 0.0961 | -0.18  | 0.1618 |
| PCHAS_145540 | 0.3437 | -0.304 | -0.729 | 0.8867 | -1.656 | 0.1062 | 0.6395 | 0.4736 | 0.5967 | 0.9496 | 1.0668 | 1.5673 |
| PCHAS_073010 | 0.1864 | 0.9625 | -0.496 | 0.4625 | 0.1461 | 0.4693 | -0.081 | 0.8053 | 0.5631 | 0.7141 | 0.782  | 0.7843 |
| PCHAS_130110 | 0.4465 | 0.3549 | 0.6518 | 0.2332 | 0.0622 | 0.3824 | -0.487 | 0.4857 | 0.7733 | 0.9938 | 0.5525 | 0.9588 |
| PCHAS_060810 | 0.7925 | 0.4975 | 0.794  | 0.207  | 0.4636 | 0.3518 | 0.2678 | -0.04  | -0.369 | -0.558 | 0.0099 | -0.32  |
| PCHAS_091460 | -0.201 | -0.888 | -2.014 | 0.0187 | -0.411 | 0.6857 | 0.9205 | 0.3892 | 0.5722 | 0.7578 | 0.5047 | 0.9947 |
| PCHAS_120140 | 0.1688 | 0.061  | 0.3345 | -0.189 | -0.05  | -0.188 | 0.3057 | 0.0121 | 0.0562 | -0.029 | 0.0415 | 0.3129 |
| PCHAS_113200 | 0.2928 | -0.063 | 0.4721 | 0.2628 | 0.3406 | -0.168 | -0.354 | -0.15  | -0.449 | -0.686 | 0.2986 | -0.398 |

|              |        |        |        |        |        |        |        |        |        |        |        |        |
|--------------|--------|--------|--------|--------|--------|--------|--------|--------|--------|--------|--------|--------|
| PCHAS_135380 | -0.024 | 0.7418 | 1.1462 | 0.3294 | 0.255  | 0.6461 | 0.3824 | -0.292 | 0.3736 | -0.386 | 0.0426 | -0.387 |
| PCHAS_031010 | 0.3542 | 0.1693 | 0.7603 | 0.269  | 0.1623 | -0.171 | 0.7797 | 0.3673 | 0.031  | -0.745 | 0.1696 | -0.055 |
| PCHAS_130890 | -0.306 | 0.2053 | 0.4525 | 0.5452 | 0.2064 | 0.0767 | 0.4233 | 0.2998 | 0.2193 | -0.724 | -0.459 | -0.454 |
| PCHAS_001110 | 0.2926 | -0.322 | -0.005 | 0.4121 | 0.2803 | 0.6025 | 0.3144 | 1.082  | 0.6926 | 0.8127 | 0.2307 | 0.7003 |
| PCHAS_092460 | 1.1784 | -0.505 | 0.1036 | -0.316 | 0.086  | -0.547 | 0.1933 | 0.5465 | -0.423 | 0.7166 | 0.8943 | 0.3726 |
| PCHAS_132910 | -0.044 | -0.509 | 0.3682 | -0.019 | -0.263 | 0.6058 | -0.883 | -0.147 | 0.3851 | 0.3121 | -0.132 | 0.1565 |
| PCHAS_120480 | 1.2458 | -0.084 | 0.2906 | -0.411 | -0.023 | -0.052 | 1.5752 | 0.3654 | 0.2892 | 0.5543 | 0.5239 | -0.539 |
| PCHAS_120450 | 0.3287 | 0.3142 | -0.284 | 0.4625 | -0.06  | 0.2223 | 0.393  | 1.3354 | 0.8454 | 1.5073 | 0.6436 | 1.36   |
| PCHAS_072210 | 1.653  | 0.0042 | 0.6767 | -1.298 | 0.1317 | -0.451 | 1.3254 | 0.7934 | -0.689 | 0.7446 | 0.5985 | -0.079 |
| PCHAS_135390 | 0.776  | 1.0191 | 1.2043 | 0.415  | 0.2718 | 0.4424 | -0.342 | 0.8148 | 0.4743 | 0.1036 | 0.2622 | 0.7099 |
| PCHAS_031040 | 1.3848 | 0.173  | -0.12  | 0.1575 | 0.0493 | -0.321 | 0.4047 | 1.1503 | -0.056 | 0.9773 | 1.2293 | 0.6964 |
| PCHAS_010530 | 0.1633 | 0.7459 | 0.6487 | 0.3434 | -0.174 | 0.2948 | 0.8857 | 0.4783 | 0.5799 | 0.0914 | 0.249  | 0.547  |
| PCHAS_051120 | -0.262 | 0.5521 | 0.2068 | 0.2529 | 0.3098 | 0.4272 | -0.256 | -0.8   | 0.6075 | 0.1674 | 0.0588 | 0.3312 |
| PCHAS_070650 | 0.0969 | -1.047 | -0.039 | 0.7479 | -0.156 | -0.455 | 0.0155 | 0.3786 | -0.499 | -0.181 | -0.046 | 0.8477 |
| PCHAS_082170 | -0.56  | -0.158 | 0.4206 | -0.462 | -0.139 | -0.589 | 1.2932 | -0.001 | -0.312 | 0.2093 | 0.0338 | 0.2615 |
| PCHAS_120360 | 0.8724 | 0.1926 | 0.8306 | 0.0288 | -0.198 | -0.319 | -0.169 | -0.148 | -0.367 | -0.432 | 0.2162 | -0.038 |
| PCHAS_112040 | -0.761 | -0.546 | 0.8629 | 0.0292 | 0.0074 | -0.353 | 0.2875 | 0.2685 | -0.157 | 0.1314 | -0.155 | 0.1955 |
| PCHAS_122590 | 0.0082 | -0.266 | 0.567  | -0.128 | 0.0573 | -0.242 | -0.051 | 0.526  | -0.107 | 0.1903 | 0.2776 | -0.029 |
| PCHAS_083490 | -0.028 | -0.172 | -0.338 | -0.283 | 0.1447 | -0.177 | 0.2614 | 0.572  | -0.167 | 0.3146 | 0.2094 | -0.209 |
| PCHAS_060130 | 0.7796 | 0.6968 | 0.6067 | 0.656  | -0.014 | 0.2135 | 0.2764 | 0.0492 | 0.179  | -0.849 | -0.063 | -0.428 |
| PCHAS_082430 | -0.467 | 0.9754 | 1.0601 | -0.152 | -0.071 | 0.0701 | -0.273 | -0.067 | 0.2554 | -0.069 | 0.2579 | 0.8737 |
| PCHAS_093530 | 0.0654 | -1.088 | 0.1348 | -0.099 | 0.0702 | -0.371 | 0.2237 | 0.8879 | 0.2163 | 0.4584 | 0.5373 | 0.5978 |
| PCHAS_103320 | -0.287 | -0.051 | -0.115 | -0.06  | 0.1143 | -0.343 | -0.54  | -0.292 | -0.767 | -0.166 | 0.0956 | 0.6377 |
| PCHAS_083280 | 0.1164 | -0.591 | 0.572  | 0.0651 | -0.023 | 0.2251 | -2.206 | -0.563 | 0.0159 | -1.125 | -0.585 | -0.744 |
| PCHAS_040310 | -0.147 | -0.5   | 0.2247 | -0.357 | 0.2554 | -0.269 | 0.3518 | 0.2975 | -0.446 | -0.552 | 0.1208 | -0.553 |
| PCHAS_010220 | 0.6597 | 0.3534 | 0.3873 | -0.133 | -0.018 | -0.209 | -0.291 | 0.3631 | -0.432 | -0.298 | 0.4855 | 0.4448 |
| PCHAS_111000 | -0.554 | 0.9727 | 0.7628 | 0.0523 | 0.0839 | 0.2362 | -0.251 | -0.109 | 0.4272 | -0.318 | 0.1396 | 0.2112 |
| PCHAS_114180 | 0.2598 | 0.1953 | 0.8807 | 0.0197 | 0.0778 | 0.2239 | -0.182 | 0.1143 | -0.154 | 0.0726 | 0.1191 | 0.0002 |
| PCHAS_122690 | -0.06  | 0.6058 | 0.666  | -0.521 | 0.1427 | -0.388 | -0.439 | -0.755 | -0.539 | -1.291 | -0.37  | -0.25  |
| PCHAS_136620 | -0.032 | -0.588 | 0.0429 | 0.0281 | 0.101  | -0.151 | -0.259 | 0.3604 | -0.025 | 0.0284 | 0.002  | 0.3505 |
| PCHAS_146640 | 0.299  | 0.048  | 0.1249 | 0.1637 | 0.1857 | 0.0271 | 0.1043 | 0.4136 | -0.081 | -0.376 | -0.115 | 0.19   |
| PCHAS_031410 | -0.784 | -0.277 | 0.2983 | 0.0026 | 0.1059 | 0.5801 | 1.2691 | -0.894 | 0.3248 | -1.079 | -0.874 | -0.426 |
| PCHAS_050840 | 0.181  | 0.4898 | 1.1269 | 0.488  | 0.3051 | 0.4458 | 0.0676 | -0.339 | 0.2451 | -0.294 | 0.0371 | -0.168 |
| PCHAS_093755 | 1.7205 | 0.4139 | 0.2144 | -0.132 | -0.021 | 0.2482 | 0.7628 | -0.234 | 0.0869 | -0.341 | 0.4715 | -0.302 |
| PCHAS_072310 | 0.1776 | -0.499 | 0.4841 | -0.082 | 0.2045 | 0.042  | 0.6272 | -0.283 | -0.112 | 0.0137 | 0.1368 | 0.037  |
| PCHAS_082950 | -0.351 | -0.62  | -0.423 | -0.859 | -0.21  | -0.634 | -0.71  | 0.4294 | -0.628 | 1.81   | 2.333  | 1.6606 |
| PCHAS_060370 | -1.534 | -2.701 | -2.472 | -2.8   | -0.612 | 0.6063 | 0.7227 | 0.1074 | 0.536  | 1.2149 | 0.8924 | 1.2509 |
| PCHAS_140640 | -0.754 | 0.1678 | 0.2116 | 0.2416 | 0.1365 | 0.3667 | -0.362 | 0.2011 | -0.124 | 0.6315 | 0.499  | 0.6321 |
| PCHAS_123410 | -0.066 | -1.527 | -0.155 | -0.027 | 0.2203 | -0.239 | -0.09  | -0.145 | -0.192 | -0.567 | 0.0494 | 0.1053 |
| PCHAS_144680 | 0.7123 | -0.591 | 0.0193 | -0.192 | 0.0245 | -0.661 | 0.7048 | 0.1032 | -0.58  | -0.843 | 0.2807 | -0.598 |
| PCHAS_050800 | 1.3977 | 0.0293 | 0.7888 | 0.0554 | 0.0299 | 0.074  | 0.5028 | 0.3919 | -0.054 | -0.168 | 0.2255 | 0.0296 |
| PCHAS_144280 | -0.276 | -0.242 | 0.4634 | -0.081 | 0.027  | -0.008 | 0.4796 | 0.4946 | -0.064 | 0.2306 | 0.2782 | 0.2298 |
| PCHAS_143390 | -0.974 | -0.772 | -0.716 | -0.811 | -0.137 | 0.3633 | 0.6858 | 0.7    | 0.3232 | 0.556  | 0.2426 | 0.3954 |
| PCHAS_143870 | -0.214 | 0.3209 | 0.5611 | -0.493 | 0.2347 | -0.158 | 0.467  | -0.804 | -0.428 | -1.338 | -1.533 | -0.842 |
| PCHAS_124030 | 0.2859 | 0.2082 | 0.1742 | -0.21  | -0.227 | -0.334 | -0.247 | -0.578 | -0.322 | -0.856 | -0.709 | -1.13  |
| PCHAS_135570 | -0.143 | 0.1208 | -0.039 | 0.1482 | 0.0597 | 0.1237 | 0.169  | 0.3193 | -0.004 | 0.0845 | -0.115 | 0.2122 |
| PCHAS_111370 | 0.9497 | 0.3433 | 0.1695 | -0.004 | 0.0419 | -0.218 | 0.277  | 0.4146 | -0.16  | -0.471 | 0.1268 | -0.052 |
| PCHAS_120200 | 0.4693 | 0.075  | 0.4176 | -0.418 | -0.09  | 0.0019 | -0.248 | -0.305 | -0.194 | 0.7723 | 1.2478 | 0.4964 |
| PCHAS_122010 | 0.3694 | 0.3921 | 0.4018 | 0.1568 | -0.069 | -0.273 | -0.382 | -0.269 | -0.435 | -0.554 | 0.1248 | -0.196 |
| PCHAS_040400 | -0.002 | 0.1515 | 0.717  | 0.2613 | 0.3622 | -0.054 | 0.2038 | -0.621 | -0.206 | -0.094 | 0.4994 | -0.095 |

|              |        |        |        |        |        |        |        |        |        |        |        |        |
|--------------|--------|--------|--------|--------|--------|--------|--------|--------|--------|--------|--------|--------|
| PCHAS_111960 | -0.808 | -1.377 | -1.518 | -1.335 | -0.222 | 0.0852 | 0.5915 | 1.0056 | 0.1439 | 1.2656 | 0.848  | 1.1323 |
| PCHAS_072490 | -1.296 | -1.018 | -0.83  | -0.169 | -0.254 | 0.0411 | 0.8701 | 0.6588 | -0.091 | 0.5786 | 0.4356 | 0.3906 |
| PCHAS_134870 | 0.7652 | -0.199 | -0.034 | -0.364 | 0.0378 | 0.0389 | 0.041  | -0.02  | -0.023 | 0.186  | 0.5177 | 0.2176 |
| PCHAS_090770 | 0.6531 | 0.2469 | -0.061 | -0.062 | -0.026 | -0.3   | 0.1143 | -0.246 | -0.34  | -0.39  | 0.7961 | 0.0513 |
| PCHAS_090160 | 0.0984 | 0.2463 | -0.178 | -0.018 | 0.0572 | 0.5021 | -0.526 | -0.106 | 0.4513 | -0.18  | -0.632 | 0.0653 |
| PCHAS_113870 | -0.082 | 0.0383 | 0.6306 | 0.1083 | 0.2516 | 0.4108 | 0.8947 | 0.5472 | 0.0357 | -0.211 | -0.409 | -0.499 |
| PCHAS_052070 | 0.0716 | 0.1888 | -0.065 | 0.1258 | -0.026 | -0.266 | 0.0467 | -0.153 | -0.548 | -0.741 | -0.706 | -0.289 |
| PCHAS_113340 | -0.316 | 0.1858 | 0.4659 | 0.2996 | 0.3125 | -0.231 | 0.4651 | -0.254 | -0.196 | -0.959 | 0.1339 | -0.62  |
| PCHAS_114510 | -0.769 | -0.16  | 0.0282 | 0.5607 | 0.3871 | 0.0336 | -0.689 | -0.056 | 0.1685 | -1.041 | -1.31  | -0.7   |
| PCHAS_051310 | 0.2691 | -0.574 | -0.035 | -0.425 | -0.274 | 0.2864 | -0.065 | -0.408 | 0.1489 | 1.0726 | 2.0816 | 0.5209 |
| PCHAS_146320 | -0.855 | 0.3542 | 0.3368 | -0.133 | 0.1486 | -0.54  | 1.9993 | 0.3911 | -0.289 | 0.9055 | 0.0151 | 0.1241 |
| PCHAS_112990 | -0.907 | -0.5   | 0.0961 | 0.0208 | 0.1912 | 0.2108 | 0.558  | 0.6295 | 0.2528 | -0.414 | -0.019 | -0.418 |
| PCHAS_071290 | -0.984 | -0.35  | 0.4299 | -0.054 | 0.0673 | 0.2216 | 0.0486 | 0.1603 | -0.343 | 0.0681 | 0.3946 | -0.09  |
| PCHAS_040200 | 0.7784 | 0.4941 | 0.3586 | 0.2122 | 0.0455 | -0.325 | -0.895 | -0.966 | -0.372 | -1.406 | -1.345 | -1.233 |
| PCHAS_122950 | 0.2116 | 0.2305 | 0.0576 | -0.041 | -0.035 | -0.504 | 0.1311 | -0.585 | -0.285 | -0.249 | 0.184  | 0.1865 |
| PCHAS_020070 | -0.42  | -0.029 | 0.2007 | 0.066  | 0.0416 | 0.0156 | 0.3449 | -0.071 | 0.0168 | -0.352 | -0.382 | -0.292 |
| PCHAS_145420 | 1.3227 | 0.4576 | 0.6498 | 0.311  | -0.079 | 0.0518 | -3E-04 | 0.1695 | 0.3216 | -0.002 | 0.2611 | -0.066 |
| PCHAS_011410 | 0.0376 | 0.2111 | -0.123 | 0.3406 | -0.036 | -0.105 | -0.11  | -0.332 | -0.142 | -1.271 | -0.704 | -0.984 |
| PCHAS_146530 | -0.909 | 0.3617 | 0.3862 | 0.7227 | 0.3615 | 0.0926 | -0.481 | 0.3857 | 0.0042 | -0.623 | -1.637 | -0.687 |
| PCHAS_071670 | -0.182 | -0.254 | -0.185 | -0.76  | -0.341 | -0.262 | 0.3229 | 0.2205 | -0.186 | -0.017 | 0.386  | -0.04  |
| PCHAS_121130 | -0.413 | -1.181 | -1.462 | -1.72  | -0.642 | 0.2701 | -0.884 | -0.923 | 0.1787 | 1.4822 | 1.6851 | 1.7119 |
| PCHAS_101250 | 0.153  | 0.1814 | -0.937 | 0.5872 | -0.789 | 0.0854 | 0.6454 | -0.101 | 0.5199 | 0.5645 | -0.184 | 0.506  |
| PCHAS_092850 | -0.177 | -0.245 | -0.365 | 0.058  | 0.16   | 0.4315 | 0.1367 | 0.1324 | 0.4304 | 0.331  | -0.292 | 0.2523 |
| PCHAS_090590 | 0.5809 | 0.0885 | -0.098 | -0.296 | -0.575 | -0.481 | -0.01  | 0.2536 | -0.572 | -0.543 | 1.0487 | 0.0323 |
| PCHAS_140330 | -0.096 | 0.494  | 0.5161 | 0.0504 | 0.0105 | 0.3303 | 0.5689 | -0.219 | -0.271 | -0.494 | -0.031 | -0.535 |
| PCHAS_061630 | -0.469 | -0.183 | -0.248 | -0.344 | -0.207 | -0.233 | 0.7743 | 0.4598 | -0.187 | 0.5211 | 0.5203 | 0.4442 |
| PCHAS_082900 | 0.581  | 0.1146 | 0.2852 | -0.221 | -0.234 | -0.452 | 0.5627 | 0.4747 | -0.251 | -0.036 | -0.012 | 0.0545 |
| PCHAS_061260 | 0.1074 | 0.3437 | 0.2772 | 0.8508 | 0.2081 | -0.133 | -0.086 | -0.545 | -0.104 | -1.642 | -0.897 | -0.968 |
| PCHAS_102450 | 0.0661 | 0.2395 | 0.066  | 0.1921 | -0.284 | -0.104 | -0.331 | -0.397 | -0.232 | -0.824 | -0.875 | -1.041 |
| PCHAS_073070 | -0.239 | 0.3972 | 0.1905 | 0.4776 | 0.2355 | 0.1312 | -0.066 | -0.391 | -8E-04 | -1.592 | -1.565 | -1.173 |
| PCHAS_091890 | -0.163 | 0.0661 | -0.793 | 0.4862 | 0.3331 | 0.3474 | 0.1244 | -0.462 | 0.3443 | -0.266 | -0.547 | -0.163 |
| PCHAS_132150 | 0.761  | 0.2684 | 0.1481 | -0.192 | -0.127 | -0.477 | 0.3198 | 0.2196 | -0.375 | -0.029 | 0.9502 | 0.0674 |
| PCHAS_121350 | -0.538 | -0.113 | -0.048 | -0.155 | 0.1028 | 0.1342 | 0.4321 | 0.6872 | 0.1081 | -0.055 | 0.2047 | -0.201 |
| PCHAS_145380 | -0.079 | -1.223 | -0.676 | -1.249 | -0.336 | -0.153 | 0.9502 | 0.3876 | -0.095 | 1.2292 | 1.2562 | 1.3768 |
| PCHAS_061520 | 0.3636 | 0.2752 | 0.4244 | 0.1556 | 0.1184 | -0.358 | 0.2831 | -0.423 | -0.304 | -1.194 | -0.724 | -0.69  |
| PCHAS_121470 | -0.275 | 0.1581 | 0.1693 | 0.4678 | -0.006 | -0.037 | -0.624 | -0.672 | -0.132 | -1.389 | -0.586 | -1.065 |
| PCHAS_091950 | 0.1798 | 0.4918 | 0.2408 | 0.2163 | 0.0653 | -0.306 | -0.628 | -0.576 | -0.206 | -1.178 | -0.741 | -0.917 |
| PCHAS_010880 | 1.0605 | 0.4784 | 0.3929 | 0.0575 | 0.123  | -0.339 | -0.597 | -0.463 | -0.322 | -0.661 | -0.194 | -0.275 |
| PCHAS_130690 | -0.166 | -0.315 | -0.175 | -0.279 | -0.1   | -0.262 | 0.2039 | 0.0639 | -0.243 | -0.127 | -0.169 | -0.036 |
| PCHAS_020210 | -0.022 | -1.623 | -1.165 | -0.821 | -0.357 | -0.645 | 0.0865 | 0.8435 | -0.532 | 1.343  | 1.9963 | 0.8535 |
| PCHAS_141040 | -1.207 | -0.557 | -0.236 | -0.375 | 0.1689 | 0.09   | 0.544  | 0.4707 | 0.0453 | 0.5448 | 0.3753 | 0.1612 |
| PCHAS_082840 | 0.4207 | 0.1648 | 0.2435 | 0.2967 | -0.044 | -0.259 | 0.4836 | 0.0569 | -0.245 | 0.5176 | 0.2848 | 0.5621 |
| PCHAS_112920 | 0.7621 | 0.5824 | 0.5007 | 0.0716 | 0.0719 | -0.301 | -0.215 | -0.277 | -0.392 | -1.041 | -0.243 | -0.484 |
| PCHAS_111810 | -1.233 | -0.533 | -0.781 | -0.031 | 0.1713 | 0.2398 | 0.779  | 0.3245 | 0.1703 | -0.106 | -0.172 | -0.162 |
| PCHAS_112810 | -0.194 | 0.0897 | 0.2397 | 0.2697 | 0.3155 | 0.2027 | 0.4739 | 0.525  | 0.1218 | -0.134 | -0.497 | -0.267 |
| PCHAS_093160 | 0.1672 | 0.3848 | 0.5375 | 0.707  | 0.0914 | -0.077 | -0.331 | -0.782 | -0.002 | -1.289 | -0.908 | -0.857 |
| PCHAS_133900 | 0.6899 | 0.4749 | -0.161 | -0.011 | -0.082 | -0.704 | -0.092 | -0.899 | -0.853 | -0.896 | -0.144 | -0.63  |
| PCHAS_070850 | -0.038 | 0.2892 | 0.8225 | 0.1215 | 0.3508 | -0.406 | 0.0652 | -0.158 | -0.375 | -1.258 | -0.799 | -0.889 |
| PCHAS_020470 | -0.845 | -1.562 | -1.521 | -1.553 | -0.31  | 0.4125 | 0.245  | 0.6642 | 0.2182 | 1.3943 | 1.0659 | 1.244  |
| PCHAS_102920 | -0.22  | 0.0144 | -0.05  | 0.302  | 0.0862 | -0.077 | -0.11  | 0.2023 | -0.05  | -0.215 | -0.09  | -0.307 |



|              |        |        |        |        |        |        |        |        |        |        |        |        |
|--------------|--------|--------|--------|--------|--------|--------|--------|--------|--------|--------|--------|--------|
| PCHAS_101220 | 0.5572 | 0.2736 | 0.0786 | -0.476 | -0.362 | -0.248 | -0.566 | -0.659 | -0.33  | -0.338 | -0.465 | -0.853 |
| PCHAS_040320 | -1.387 | -1.091 | -1.121 | 0.1149 | 0.1329 | 0.5831 | 0.7319 | 0.4573 | 0.5313 | -0.557 | -0.498 | -0.401 |
| PCHAS_140150 | 1.1438 | 0.3539 | -0.139 | -0.434 | -0.733 | -0.44  | -0.676 | -0.846 | -0.542 | 0.1237 | 1.0165 | 0.3538 |
| PCHAS_010310 | 0.9565 | 0.3655 | 0.0569 | 0.3254 | 0.225  | 0.0008 | 0.532  | 0.2002 | 0.0673 | -0.362 | -0.488 | -0.043 |
| PCHAS_091140 | -0.188 | -0.073 | -0.047 | -0.093 | -0.106 | -0.557 | -0.248 | -0.038 | -0.43  | 0.2689 | 0.0019 | 0.5164 |
| PCHAS_133630 | -0.041 | -0.482 | -0.514 | -0.307 | -0.16  | 0.1353 | -0.183 | -0.477 | 0.009  | 0.9008 | 1.472  | 1.2241 |
| PCHAS_031440 | -0.108 | -0.012 | 0.0811 | 0.0657 | 0.1668 | -0.01  | 0.1903 | 0.5966 | 0.3497 | 0.8304 | 0.4978 | 1.1853 |
| PCHAS_093500 | -0.278 | 0.1331 | 0.4684 | 0.0156 | 0.382  | -0.067 | 0.0532 | -0.563 | -0.301 | -0.255 | -1.029 | -0.923 |
| PCHAS_061570 | -0.022 | -0.016 | 0.2594 | -0.283 | 0.0404 | 0.0378 | 0.3685 | 0.0591 | -0.048 | -0.117 | -0.142 | -0.082 |
| PCHAS_141370 | 0.0914 | 0.2624 | 0.5369 | 0.6266 | 0.2547 | -0.155 | -0.031 | -0.142 | -0.064 | -1.559 | -1.533 | -0.633 |
| PCHAS_050930 | 0.5501 | 0.3338 | 0.3519 | 0.2567 | -0.187 | -0.292 | -0.495 | -0.322 | -0.343 | -0.689 | -0.333 | -0.65  |
| PCHAS_121420 | 0.1496 | 0.2028 | 0.2713 | 0.0406 | -0.23  | 0.1386 | 0.4208 | -0.096 | -0.005 | -0.279 | -0.173 | -0.119 |
| PCHAS_110650 | -0.258 | -0.897 | -1.016 | -1.14  | -0.598 | 1.1983 | 1.1324 | 0.2208 | 0.1886 | 2.3022 | 1.7885 | 1.9354 |
| PCHAS_132580 | 0.8508 | -0.012 | 0.5322 | -0.077 | 0.0821 | 0.101  | -0.077 | -0.259 | -0.398 | -1.298 | -1.135 | -0.997 |
| PCHAS_120100 | 1.0199 | 0.9642 | 0.4045 | -0.022 | 0.1255 | 0.888  | 0.218  | -0.225 | -0.416 | -0.852 | 0.1126 | 0.0162 |
| PCHAS_122570 | -0.452 | 0.0411 | 0.3702 | 0.0151 | 0.0349 | 0.1499 | 0.9619 | 0.4546 | 0.0414 | 1.0344 | 0.3397 | 0.8187 |
| PCHAS_090970 | -0.222 | -0.209 | 0.2101 | -0.066 | -0.098 | -0.063 | -0.025 | 0.1653 | -0.144 | -0.266 | -0.09  | -0.003 |
| PCHAS_061800 | -0.037 | 0.2738 | 0.5251 | 0.1679 | 0.2661 | -0.329 | 0.1436 | 0.082  | -0.233 | -0.884 | -0.064 | -0.503 |
| PCHAS_142780 | 0.4182 | 1.1469 | 0.4655 | 0.4148 | -0.032 | -0.124 | -0.118 | -0.579 | 0.0757 | -0.579 | -0.312 | -0.259 |
| PCHAS_092150 | -0.241 | -0.347 | 0.3599 | 0.0751 | -0.008 | 0.0201 | 0.021  | -0.115 | 0.0405 | -0.516 | -0.114 | -0.146 |
| PCHAS_145040 | 0.1806 | -0.003 | 0.2028 | 0.4831 | 0.236  | -0.2   | 0.3998 | 0.3145 | 0.0375 | -0.204 | -0.002 | -0.201 |
| PCHAS_093410 | -0.128 | -0.033 | 0.0477 | -0.184 | 0.0844 | 0.0934 | 0.3421 | -0.065 | 0.2514 | -0.577 | -0.104 | -0.475 |
| PCHAS_061330 | -0.726 | -0.836 | -0.988 | -0.911 | -0.102 | 0.4584 | -0.191 | 0.3455 | 0.3729 | 0.8263 | 0.3854 | 0.7309 |
| PCHAS_082540 | -0.511 | 0.2859 | 0.2079 | 0.5891 | 0.1064 | -0.348 | -0.376 | -0.479 | -0.254 | -0.993 | -0.488 | -0.345 |
| PCHAS_112960 | 0.1281 | 0.1785 | 0.1955 | 0.099  | -0.079 | -0.131 | 0.5597 | 0.2969 | -0.186 | -0.616 | 0.0814 | -0.547 |
| PCHAS_071680 | -0.085 | 0.1636 | 0.3768 | 0.1721 | 0.3203 | -0.096 | 0.6505 | -0.344 | -0.022 | -0.955 | -0.287 | -0.747 |
| PCHAS_061610 | 0.2122 | 0.1346 | 0.421  | 0.1511 | -0.307 | -0.244 | -0.204 | -0.267 | -0.292 | -0.422 | -0.456 | -0.489 |
| PCHAS_132680 | -0.332 | -1.553 | -0.842 | -1.25  | -0.34  | -0.834 | -0.534 | -0.756 | -0.171 | 1.9791 | 2.1225 | 1.7313 |
| PCHAS_040750 | 0.0085 | -0.481 | -0.843 | -1.192 | -0.632 | -0.293 | -0.908 | -0.801 | -0.604 | 1.5827 | 2.6138 | 1.6629 |
| PCHAS_020410 | 0.1556 | -0.328 | -0.019 | 0.0422 | -0.614 | -0.163 | 1.028  | 0.6206 | -0.168 | 0.1966 | 0.2109 | -0.181 |
| PCHAS_144730 | -0.261 | 0.0582 | -0.096 | -0.036 | 0.3016 | -0.19  | 0.4237 | 0.6886 | -0.017 | -0.357 | 0.4029 | -0.453 |
| PCHAS_123100 | -0.045 | 0.3556 | 0.3646 | 0.3613 | 0.2693 | 0.1271 | -0.244 | -0.347 | 0.0583 | -0.974 | -0.737 | -0.601 |
| PCHAS_146030 | 0.2727 | 0.3988 | 0.4021 | 0.2917 | 0.2999 | -0.116 | -0.021 | -0.65  | -0.103 | -1.347 | -0.947 | -0.84  |
| PCHAS_010910 | -0.628 | 0.5138 | 0.1987 | 0.3654 | 0.4527 | -0.083 | 0.2057 | 0.0305 | 0.062  | -0.771 | -0.26  | -0.434 |
| PCHAS_081710 | -0.135 | 0.0306 | 0.3366 | -0.255 | 0.1789 | -0.058 | 0.3739 | 0.5009 | -0.25  | 0.5631 | 0.7715 | 0.8247 |
| PCHAS_010930 | 0.6579 | 0.4274 | -0.017 | 0.2649 | 0.1144 | -0.042 | -0.607 | 0.0111 | -0.214 | -0.263 | -1.064 | -0.781 |
| PCHAS_143480 | 1.0606 | 0.0033 | 0.1703 | 0.1699 | -0.039 | -0.891 | -0.288 | -0.812 | -0.702 | -1.319 | -0.622 | -1.278 |
| PCHAS_060920 | -0.997 | -0.841 | -0.363 | -0.545 | -0.098 | 0.2491 | 0.7504 | 0.5016 | 0.2711 | 0.4031 | -0.428 | 0.3239 |
| PCHAS_135160 | 0.3429 | -0.324 | -1.2   | -0.646 | -0.707 | -0.195 | -0.05  | -0.258 | -0.106 | 0.1643 | 1.3194 | 0.7653 |
| PCHAS_101400 | -0.437 | -0.356 | -0.439 | -0.215 | 0.0301 | 0.1415 | 0.034  | 0.069  | 0.3087 | 0.184  | -0.09  | 0.2709 |
| PCHAS_131220 | 0.6986 | 0.7808 | 0.5772 | -0.018 | -0.205 | -0.477 | 0.356  | -0.464 | -0.488 | -1.984 | -1.698 | -1.168 |
| PCHAS_132670 | 0.5718 | -0.472 | -0.15  | -0.667 | -0.105 | -0.088 | 0.4311 | 0.5785 | -0.297 | 0.8028 | 1.0408 | 0.246  |
| PCHAS_010240 | 0.5328 | 0.3654 | -0.282 | 0.2707 | 0.183  | -0.044 | 0.5751 | 0.2088 | -0.197 | -0.256 | -0.713 | -0.39  |
| PCHAS_062000 | -0.364 | 0.0852 | 0.1926 | 0.502  | 0.1697 | 0.1796 | 0.3171 | 0.1807 | 0.346  | -0.29  | 0.1295 | -0.467 |
| PCHAS_092840 | 0.1439 | 0.6864 | 1.0374 | 0.7108 | 0.1082 | 0.4957 | -1.04  | -0.002 | 0.2012 | -0.323 | -0.554 | -0.667 |
| PCHAS_131880 | -0.207 | -0.576 | -0.6   | -0.302 | -0.109 | 0.2223 | 0.0774 | 0.0568 | 0.2283 | 0.327  | 0.0167 | 0.4172 |
| PCHAS_093730 | 0.7135 | 0.2226 | -0.041 | -0.17  | -0.049 | -0.239 | -0.062 | 0.1438 | -0.468 | -0.15  | 0.3622 | 0.0598 |
| PCHAS_103360 | -0.054 | 0.6346 | 0.3358 | 0.3547 | 0.1571 | 0.8424 | 0.0097 | -0.254 | 0.2017 | -1.831 | -1.104 | -0.807 |
| PCHAS_092910 | -0.582 | -1.018 | -0.783 | -0.679 | -0.339 | 0.0906 | 1.2036 | 1.4757 | 0.1089 | 1.3387 | 1.0468 | 0.997  |
| PCHAS_082420 | 0.4476 | 0.1854 | 0.4168 | 0.0534 | 0.0644 | 0.0308 | 0.6078 | -0.058 | 0.0579 | -0.729 | 0.1552 | -0.514 |

|              |        |        |        |        |        |        |        |        |        |        |        |        |
|--------------|--------|--------|--------|--------|--------|--------|--------|--------|--------|--------|--------|--------|
| PCHAS_114730 | -0.496 | 0.205  | 0.0023 | 0.1817 | 0.1867 | 0.3603 | 0.4644 | 0.462  | 0.2133 | 0.5898 | 0.6212 | 0.4325 |
| PCHAS_112280 | -0.242 | 0.3345 | 0.4793 | 0.3212 | 0.0812 | -0.067 | 0.4292 | 0.391  | 0.0519 | -0.144 | -1.014 | -0.122 |
| PCHAS_093170 | -1.063 | -0.31  | -0.226 | -0.155 | 0.1474 | 0.2286 | 0.6228 | 0.8057 | 0.3717 | 0.078  | 0.0812 | -0.146 |
| PCHAS_031630 | -0.815 | -1.22  | -1.747 | -1.466 | -0.436 | 0.2794 | 0.1253 | 0.3366 | 0.2805 | 1.2176 | 0.8018 | 1.6818 |
| PCHAS_060450 | -0.427 | -0.023 | -0.041 | 0.2839 | 0.1291 | 0.1066 | 0.2485 | 0.0235 | 0.121  | -0.855 | -0.705 | -0.897 |
| PCHAS_130530 | -0.65  | -0.288 | -0.309 | 0.2452 | 0.2473 | 0.188  | 0.6677 | 0.2711 | 0.1393 | -0.448 | -0.195 | -0.417 |
| PCHAS_110960 | -1.257 | -0.534 | 0.0452 | -0.222 | -0.108 | 0.901  | -0.082 | 0.3224 | -0.009 | 0.7873 | 0.3648 | 0.1698 |
| PCHAS_010260 | -0.382 | 0.2715 | -0.119 | 0.1088 | 0.0785 | 0.4228 | 0.279  | 0.372  | 0.4359 | -0.723 | -0.31  | -0.397 |
| PCHAS_110910 | -0.433 | 0.622  | -0.127 | 0.3507 | 0.1047 | 0.4311 | -0.118 | -0.06  | 0.3071 | 0.0058 | -1.078 | -0.293 |
| PCHAS_100810 | -0.407 | 0.1435 | -0.207 | 0.2096 | 0.128  | 0.1614 | 0.0455 | 0.0641 | 0.1765 | -0.225 | -0.733 | -0.227 |
| PCHAS_111130 | -0.702 | 0.2149 | 0.2481 | -0.038 | 0.1417 | -0.193 | 1.2126 | -0.032 | -0.35  | -0.447 | -0.069 | -0.586 |
| PCHAS_103240 | 0.3446 | 0.4788 | 0.4986 | 0.3076 | 0.2064 | -0.063 | -0.505 | -0.569 | -0.104 | -0.397 | -0.57  | -0.463 |
| PCHAS_061820 | 0.5357 | 0.2944 | 0.5895 | 0.0374 | 0.265  | 0.0217 | 0.0991 | 0.0827 | -0.01  | -0.234 | 0.1498 | -0.279 |
| PCHAS_031300 | -0.178 | -0.01  | 0.5438 | 0.1768 | 0.3759 | -0.098 | 0.2266 | -0.06  | 0.0251 | -1.076 | -0.562 | -0.653 |
| PCHAS_060740 | 0.0437 | -0.342 | -0.264 | -0.383 | 0.0775 | 0.7336 | -0.285 | 0.199  | 0.5876 | 0.9193 | -0.208 | 0.6095 |
| PCHAS_071240 | -0.132 | -0.595 | -0.352 | -0.203 | -0.213 | -0.594 | -0.043 | -0.041 | -0.259 | 0.1257 | 1.861  | -0.151 |
| PCHAS_052010 | 0.1547 | 0.0684 | 0.3645 | 0.1166 | 0.0069 | -0.02  | -0.806 | -0.498 | 0.0554 | -0.882 | -1.197 | -1.087 |
| PCHAS_050880 | 0.0748 | -0.218 | -0.883 | 0.496  | -0.284 | 0.6777 | -0.137 | 0.4548 | -0.036 | 0.4444 | 0.5644 | 0.3929 |
| PCHAS_123430 | -0.596 | -0.228 | 0.3886 | -0.29  | -0.088 | -0.288 | 0.7773 | -0.448 | -0.406 | -0.17  | -0.503 | -0.092 |
| PCHAS_123620 | -1.415 | -0.209 | -0.792 | 0.0563 | 0.2165 | 0.1095 | 0.1001 | 0.0174 | 0.0016 | -0.426 | -0.696 | -0.417 |
| PCHAS_050610 | 0.3608 | -0.571 | -0.663 | -0.773 | 0.1056 | 0.3024 | -0.518 | 0.2222 | 0.5436 | 1.3659 | 0.6887 | 1.2444 |
| PCHAS_010090 | -0.379 | -0.4   | -0.551 | -0.409 | -0.229 | -0.235 | -0.127 | -0.091 | -0.2   | 0.2229 | 0.9518 | 0.6212 |
| PCHAS_030450 | 0.2155 | 0.2096 | 0.1464 | -0.077 | 0.0238 | -0.43  | 0.2895 | 0.1434 | -0.257 | -0.256 | 0.1903 | -0.306 |
| PCHAS_000690 | 1.478  | 0.4653 | -0.025 | -0.702 | -0.725 | -0.581 | -0.967 | -0.237 | -0.577 | 0.8381 | 2.2508 | 1.0889 |
| PCHAS_103850 | -0.952 | -0.523 | 0.0247 | -0.241 | 0.0474 | -0.624 | 0.2671 | 0.4624 | -0.195 | -0.121 | 0.0587 | -0.194 |
| PCHAS_112590 | 0.3285 | 0.1448 | -0.141 | 0.1549 | 0.0123 | -0.476 | 0.2313 | -0.636 | -0.377 | -1.049 | -0.678 | -0.932 |
| PCHAS_021080 | -0.958 | -0.145 | 0.2308 | 0.2649 | 0.2336 | 0.0308 | 0.2476 | 0.057  | 0.0529 | -0.648 | -0.85  | -0.519 |
| PCHAS_142090 | 0.2452 | 0.3838 | 0.4275 | 0.0371 | 0.0101 | -0.451 | -0.214 | -0.023 | -0.362 | -0.512 | 0.1136 | -0.327 |
| PCHAS_082740 | 0.2658 | -0.206 | 0.0763 | 0.1945 | 0.1927 | 0.3174 | 0.0633 | 0.2615 | 0.1349 | 0.1289 | -0.791 | 0.0351 |
| PCHAS_082690 | -0.091 | 0.2827 | 0.0993 | -0.14  | -0.259 | 0.0379 | -0.376 | -0.529 | -0.008 | 0.1814 | 0.2445 | 0.2825 |
| PCHAS_051630 | -0.651 | -1.047 | -0.381 | -0.534 | -0.083 | -0.236 | 0.933  | 0.6735 | -0.416 | 0.0776 | 0.9936 | 0.1696 |
| PCHAS_103790 | -0.021 | 0.6875 | 0.3913 | 0.3042 | 0.3314 | -0.156 | 0.1294 | -0.405 | -0.255 | -1.436 | -2.055 | -0.934 |
| PCHAS_110170 | 0.3713 | 0.5796 | 0.3203 | 0.1406 | -0.257 | -0.224 | -0.264 | -0.141 | -0.22  | -0.902 | -0.147 | -0.414 |
| PCHAS_011450 | 0.1434 | 0.3752 | 0.1855 | 0.5594 | 0.1343 | 0.2489 | -0.809 | 0.0258 | 0.2039 | -0.486 | -0.752 | -0.678 |
| PCHAS_142810 | -0.035 | 0.1919 | 0.4034 | 0.5379 | 0.3271 | 0.5375 | -0.093 | -0.297 | 0.1331 | -0.822 | -0.621 | -0.729 |
| PCHAS_120980 | 0.0015 | -0.264 | 0.0109 | -0.462 | 0.0264 | -0.054 | 0.7943 | 0.6843 | 0.063  | -0.144 | 0.6415 | -0.253 |
| PCHAS_060930 | -0.53  | 0.0846 | 0.3638 | 0.226  | 0.2233 | 0.1103 | 0.5977 | -0.048 | -0.138 | -0.454 | -0.393 | -0.627 |
| PCHAS_010800 | -0.462 | 1.2392 | 0.9288 | 0.2747 | -0.121 | -0.637 | -0.471 | -0.648 | -0.871 | -1.302 | -0.991 | -2.02  |
| PCHAS_112640 | 0.4213 | 0.2765 | 0.3185 | 0.2805 | 0.1673 | -0.019 | -0.572 | -0.226 | -0.007 | -0.497 | -0.892 | -0.427 |
| PCHAS_111510 | -0.227 | 0.0813 | 0.4309 | 0.0368 | #####  | -0.544 | -0.028 | -0.357 | -0.506 | -0.564 | 0.2769 | -0.149 |
| PCHAS_122830 | 0.6374 | 0.4071 | 0.0239 | -0.274 | -0.274 | -0.281 | -0.762 | -0.472 | -0.384 | -0.043 | 0.2375 | -0.122 |
| PCHAS_140480 | -0.054 | 0.0779 | 0.4656 | 0.3122 | 0.0792 | 0.0366 | 0.5818 | 0.0998 | 0.0924 | -0.994 | -0.528 | -0.232 |
| PCHAS_144510 | -0.087 | 0.482  | 0.2234 | 0.4051 | 0.0139 | -0.477 | -0.148 | -0.3   | -0.244 | -0.339 | 0.4667 | -0.226 |
| PCHAS_011350 | -0.239 | -0.826 | -1.153 | -1.733 | -0.46  | 0.3396 | 0.2672 | 0.8989 | 0.3418 | 1.2216 | 1.4332 | 0.7633 |
| PCHAS_145320 | 0.6725 | 0.4434 | 0.1405 | -0.397 | -0.569 | -0.483 | -1.126 | -0.53  | -0.7   | 0.3463 | 0.6652 | 0.1507 |
| PCHAS_146660 | 0.7888 | 0.3589 | 0.5577 | 0.3755 | -0.337 | 0.1158 | -0.858 | 0.0727 | 0.0772 | 0.133  | 0.0124 | -0.033 |
| PCHAS_146180 | -0.196 | -1.243 | -1.858 | -2.182 | -1.129 | -0.468 | -1.107 | -0.704 | -0.56  | 1.4803 | 2.1377 | 1.9641 |
| PCHAS_146450 | -0.386 | -0.068 | -0.118 | 0.5192 | 0.5091 | 0.0593 | 0.7312 | -0.334 | 0.3265 | -0.962 | -0.562 | -0.644 |
| PCHAS_082000 | 0.3251 | 0.6014 | 0.4105 | 0.1414 | -0.068 | -0.168 | -0.341 | -0.344 | -0.344 | -0.471 | 0.2171 | -0.185 |
| PCHAS_072830 | -1.467 | -1.11  | -1.646 | -1.054 | -0.274 | 0.3505 | 1.1312 | 1.1879 | 0.4591 | 0.5109 | 0.3515 | 0.3413 |

|              |        |        |        |        |        |        |        |        |        |        |        |        |
|--------------|--------|--------|--------|--------|--------|--------|--------|--------|--------|--------|--------|--------|
| PCHAS_092530 | 0.9477 | 0.6374 | 0.2719 | 0.2564 | -0.021 | -0.41  | -1.192 | -0.938 | -0.506 | -1.226 | -0.316 | -0.987 |
| PCHAS_132750 | -0.375 | 0.1799 | 0.3435 | 0.2855 | 0.0668 | 0.2482 | 0.2123 | -0.185 | 0.2544 | -0.19  | -0.107 | -0.125 |
| PCHAS_122640 | 0.0862 | -0.004 | -0.427 | -0.44  | -0.272 | -0.022 | 0.3205 | 0.3201 | -0.134 | 0.372  | 0.1812 | 0.1098 |
| PCHAS_050410 | -0.014 | 0.5222 | -0.034 | 0.9493 | 0.2283 | -0.177 | -0.711 | -1.187 | -0.212 | -1.329 | -0.941 | -0.686 |
| PCHAS_142660 | 0.0471 | 0.315  | 0.4777 | -0.152 | -0.009 | -0.243 | -0.111 | 0.0066 | -0.494 | -0.237 | 0.3257 | -0.349 |
| PCHAS_102850 | -0.04  | -0.73  | 0.0394 | -0.342 | -0.13  | 0.1824 | 0.3848 | 0.1776 | 0.0089 | 0.6387 | 0.9602 | 0.4355 |
| PCHAS_101340 | -0.305 | 0.3639 | 0.3845 | 0.4296 | 0.1483 | 0.3777 | 0.3024 | 0.0732 | 0.2877 | -0.526 | -0.61  | -0.049 |
| PCHAS_110950 | 1.0138 | 0.641  | 0.1627 | 0.2591 | 0.2114 | 1.1173 | 0.5393 | 0.3395 | 0.4286 | -0.139 | 0.2799 | -0.053 |
| PCHAS_040300 | -0.65  | -0.485 | -0.264 | 0.0184 | 0.2938 | -0.046 | 0.4333 | -0.036 | 0.2426 | -0.356 | 0.0598 | -0.319 |
| PCHAS_110690 | -0.232 | -0.167 | 0.0327 | -0.08  | 0.0977 | 0.0308 | 0.5194 | 0.1429 | 0.1159 | -0.071 | -0.137 | -0.203 |
| PCHAS_124070 | -0.473 | -0.147 | -0.102 | 0.4244 | 0.1251 | 0.2695 | -0.116 | 0.3383 | 0.1957 | -0.059 | 0.009  | -0.356 |
| PCHAS_082550 | -0.541 | -0.112 | 0.6121 | -0.124 | -0.022 | -0.247 | -0.431 | -0.481 | -0.609 | 0.031  | 0.4211 | -0.221 |
| PCHAS_091910 | 1.1025 | 0.5502 | 0.6948 | 0.3163 | 0.2281 | -0.542 | -0.679 | -0.776 | -0.528 | -1.612 | -1.067 | -1.131 |
| PCHAS_102940 | -0.196 | 0.0138 | -0.112 | -0.081 | -0.201 | -0.355 | -0.454 | 0.3665 | -0.48  | 0.0767 | 0.1474 | 0.0204 |
| PCHAS_093630 | 0.4367 | 0.2014 | 0.3371 | 0.146  | -0.245 | -0.249 | -0.23  | 0.1613 | -0.29  | -0.39  | -0.924 | -0.6   |
| PCHAS_090560 | -0.102 | -0.074 | 0.4951 | -0.114 | -0.467 | 0.2446 | 0.4429 | 0.0413 | -0.267 | -1.038 | -0.385 | -1.081 |
| PCHAS_081620 | 0.1954 | 0.5829 | -0.395 | -0.057 | 0.0983 | -0.115 | 0.09   | -0.155 | 0.0024 | -0.442 | -0.773 | -0.033 |
| PCHAS_136230 | -0.117 | -0.606 | -0.448 | -1.075 | -0.421 | -0.145 | 0.5469 | 0.124  | -0.157 | 0.993  | 0.8496 | 0.4188 |
| PCHAS_051690 | -0.166 | 0.0081 | 0.2071 | 0.1117 | 0.33   | 0.0183 | 0.2974 | 0.094  | -0.022 | -0.758 | 0.1898 | -0.62  |
| PCHAS_040870 | 0.0021 | 0.4425 | 0.317  | 0.5695 | 0.1229 | -0.02  | -0.206 | -0.395 | -0.132 | -1.156 | -0.89  | -0.785 |
| PCHAS_110890 | -0.12  | 0.4313 | 0.1442 | 0.299  | 0.0016 | -0.29  | -0.176 | -0.3   | -0.303 | -0.371 | -0.263 | -0.296 |
| PCHAS_133720 | 0.3448 | 0.7758 | 0.6127 | 0.5804 | 0.0983 | -0.038 | -0.22  | -0.724 | -0.21  | -1.404 | -1.17  | -0.879 |
| PCHAS_070710 | 0.5534 | 0.1173 | 0.0116 | 0.1494 | -0.044 | 0.145  | -0.006 | 0.0376 | -0.07  | 0.4166 | 0.8779 | 0.6304 |
| PCHAS_081460 | 0.1642 | 0.3982 | 0.4603 | 0.1609 | 0.0196 | -0.379 | -0.241 | -0.461 | -0.505 | -1.033 | -0.117 | -0.554 |
| PCHAS_081740 | -0.079 | 0.2215 | 0.4135 | -0.009 | -0.058 | -0.058 | 0.4975 | 0.0398 | -0.048 | 0.639  | 1.8813 | 0.5429 |
| PCHAS_060060 | 0.4418 | 0.5006 | 0.3883 | 0.3765 | 0.1208 | -0.298 | 0.0507 | -0.762 | -0.301 | -2.081 | -1.199 | -1.327 |
| PCHAS_101130 | 0.0882 | -1.418 | -1.227 | -1.32  | -0.669 | -0.128 | -0.294 | -0.434 | -0.176 | 2.0248 | 2.2578 | 2.0197 |
| PCHAS_120640 | 0.2634 | 0.5276 | 0.4788 | 0.2039 | 0.1271 | 0.1582 | -0.129 | 0.1955 | -0.187 | -0.088 | 0.6332 | 0.0317 |
| PCHAS_133380 | 0.1106 | 0.0683 | 0.3177 | 0.055  | 0.0389 | -0.009 | -0.033 | -0.084 | -0.024 | -0.184 | 0.7819 | -0.225 |
| PCHAS_136970 | -0.352 | -0.508 | 0.0615 | -0.194 | -0.154 | -0.111 | -0.255 | 0.4512 | -0.083 | 0.1098 | 0.8661 | -0.239 |
| PCHAS_083610 | 0.3589 | 0.0685 | 0.4915 | -0.474 | 0.1134 | -0.603 | 0.3582 | 0.3677 | -0.456 | -0.145 | 0.4385 | -0.18  |
| PCHAS_113770 | -0.185 | 0.255  | 0.0236 | 0.0937 | 0.0759 | 0.0982 | 0.4412 | -0.175 | 0.0111 | -0.544 | -0.434 | -0.45  |
| PCHAS_020220 | 0.1777 | 0.446  | 0.4076 | 0.2233 | 0.1875 | 0.1043 | -0.334 | -0.557 | -0.033 | -1.117 | -0.913 | -0.715 |
| PCHAS_144410 | -0.348 | -0.379 | 0.1398 | 0.3837 | 0.2267 | -0.086 | 0.1533 | 0.4054 | -0.197 | 0.1211 | -2.018 | 0.1173 |
| PCHAS_141080 | -0.863 | 0.1665 | 0.0722 | 0.3584 | 0.1272 | 0.3305 | 0.1168 | -0.041 | 0.3777 | -0.387 | -0.417 | -0.533 |
| PCHAS_092610 | -1.403 | -1.027 | -0.512 | -0.031 | -0.044 | 0.472  | 1.8094 | 1.3197 | 0.5617 | 1.0154 | -1.466 | 0.3443 |
| PCHAS_041740 | -0.625 | -0.196 | -0.159 | 0.6698 | 0.3406 | 0.3389 | -0.042 | 0.2783 | 0.4463 | -0.36  | -0.878 | -0.454 |
| PCHAS_000870 | 0.0437 | 0.1179 | 0.2769 | 0.213  | -0.011 | -0.131 | 0.2383 | -0.027 | -0.301 | 0.037  | 0.4227 | 0.1152 |
| PCHAS_112940 | 0.5738 | 0.6554 | 0.1785 | 0.1445 | 0.0513 | 0.0214 | -0.278 | -0.07  | 0.0048 | -0.453 | -0.539 | -0.316 |
| PCHAS_110250 | -0.342 | -0.011 | 0.2686 | 0.1422 | 0.1141 | -0.301 | 0.7179 | -0.211 | -0.45  | -0.526 | -0.588 | -0.247 |
| PCHAS_103370 | 1.2551 | 0.2195 | 0.2798 | -0.605 | -0.124 | -0.393 | 0.2117 | -0.476 | -0.794 | 0.1259 | 0.7474 | 0.3635 |
| PCHAS_142990 | 0.7243 | 0.3482 | 0.5182 | -0.081 | -0.237 | -0.565 | -0.003 | -0.167 | -0.615 | -0.647 | -0.405 | -0.523 |
| PCHAS_122420 | -0.657 | 0.2491 | 0.4012 | 0.0614 | 0.3212 | -0.384 | 0.3222 | 0.2886 | -0.107 | -0.429 | -0.028 | -0.52  |
| PCHAS_134780 | -0.081 | -0.478 | -0.625 | -0.268 | 0.2283 | 0.5587 | 0.0665 | 0.6716 | 0.6249 | 1.0773 | -0.101 | 0.7938 |
| PCHAS_083470 | -0.163 | -0.375 | -0.039 | -0.311 | 0.0288 | 0.1362 | 0.4459 | 0.7292 | 0.1594 | 0.4699 | 0.3098 | 0.2105 |
| PCHAS_133920 | 0.2289 | -0.615 | -0.1   | -0.268 | -0.093 | 0.1712 | 0.9298 | -0.123 | 0.0498 | 0.4248 | 0.8339 | 0.5596 |
| PCHAS_135860 | -0.262 | 0.4243 | 0.6726 | 0.0245 | 0.1223 | -0.095 | -0.007 | -0.29  | -0.207 | -0.648 | 0.0788 | -0.464 |
| PCHAS_145470 | -0.261 | 0.1144 | 0.3835 | 0.2262 | 0.0841 | -0.164 | 0.0558 | -0.057 | -0.104 | -0.426 | -0.062 | -0.442 |
| PCHAS_061310 | 0.2422 | 0.4015 | -0.611 | 0.2711 | -0.337 | 0.3474 | 0.5434 | -0.128 | -0.044 | -0.138 | -0.226 | -0.286 |
| PCHAS_011420 | 1.1921 | 0.6614 | -0.004 | -0.946 | -0.836 | -0.921 | -1.541 | -0.938 | -1.017 | 0.0254 | 1.1511 | -0.063 |

|              |        |        |        |        |        |        |        |        |        |        |        |        |
|--------------|--------|--------|--------|--------|--------|--------|--------|--------|--------|--------|--------|--------|
| PCHAS_112860 | -0.719 | -1.617 | -0.653 | -0.51  | -0.027 | 0.4124 | 0.2232 | 0.8378 | 0.4265 | 0.797  | -0.164 | 0.3403 |
| PCHAS_081150 | 0.3681 | 0.3419 | -0.238 | 0.2728 | -0.207 | -0.156 | -0.103 | -0.172 | -0.301 | -0.499 | -0.872 | -0.327 |
| PCHAS_133690 | -0.072 | 0.2051 | 0.3769 | -0.415 | -0.371 | -0.443 | 0.3833 | -0.089 | -0.492 | -0.306 | 0.387  | -0.05  |
| PCHAS_123460 | 0.0632 | -0.105 | -0.321 | -0.346 | -0.028 | -0.123 | 0.391  | 0.5077 | -0.049 | 0.8969 | 0.6595 | 0.4843 |
| PCHAS_113590 | -0.268 | 0.1705 | -0.07  | 0.0456 | -0.054 | -0.117 | 0.374  | 0.3885 | -0.093 | -0.554 | 0.1277 | -0.485 |
| PCHAS_010100 | 0.3485 | 0.6188 | 0.2687 | 0.405  | -0.37  | -0.149 | -0.35  | -0.029 | -0.264 | -0.249 | -0.237 | -0.262 |
| PCHAS_113210 | -0.184 | -0.259 | 0.1126 | -0.624 | -0.148 | -0.473 | 0.7828 | 0.4569 | -0.218 | 0.3847 | 0.7033 | 0.1178 |
| PCHAS_081130 | -0.159 | -0.149 | 0.1774 | -0.174 | -0.008 | -0.226 | 0.3584 | 0.6017 | -0.155 | -0.008 | 0.6031 | -0.07  |
| PCHAS_110760 | -0.563 | -0.495 | 0.686  | -0.261 | 0.2577 | -0.456 | 0.5595 | 0.5184 | -0.25  | -0.101 | -0.257 | -0.278 |
| PCHAS_061320 | 0.8107 | 0.2902 | 0.1404 | 0.0797 | -0.103 | 0.0112 | 0.1312 | 0.0469 | 0.1523 | -0.333 | 0.609  | -0.392 |
| PCHAS_110370 | -0.325 | -0.487 | 0.1525 | -0.183 | 0.2989 | -0.433 | -0.48  | -0.075 | -0.048 | -0.301 | -0.833 | -0.962 |
| PCHAS_091880 | -0.425 | 0.0351 | -0.498 | -1.07  | -0.138 | 0.0551 | 0.0342 | 0.2405 | 0.1252 | 1.484  | 1.2604 | 0.9506 |
| PCHAS_140300 | 0.3697 | 0.0547 | -0.117 | -0.007 | -0.21  | -0.308 | -0.106 | -0.244 | -0.232 | -0.2   | -0.22  | -0.008 |
| PCHAS_070430 | 0.8653 | 0.3163 | 0.4861 | -0.227 | 0.0637 | -0.373 | 0.7962 | -0.533 | -0.559 | -0.893 | 0.0282 | -0.581 |
| PCHAS_121810 | 0.7363 | -0.331 | -0.191 | -0.412 | -0.06  | 0.7554 | -0.326 | -0.259 | 0.6109 | 1.2352 | 0.0763 | 1.3906 |
| PCHAS_136630 | -0.412 | 0.8161 | 0.9739 | 0.053  | -0.021 | -0.224 | -0.818 | 0.1624 | 0.2239 | 0.1071 | 0.3113 | -0.391 |
| PCHAS_123200 | 0.5104 | 0.496  | 0.4884 | 0.1742 | 0.0796 | -0.236 | 0.0966 | -0.505 | -0.341 | -0.477 | -0.964 | -0.695 |
| PCHAS_092710 | -1.14  | -0.491 | -0.351 | 0.1838 | 0.13   | -0.297 | -0.12  | 0.2448 | 0.2764 | -0.556 | -0.757 | -0.635 |
| PCHAS_114310 | 0.0706 | 0.3043 | 0.2262 | 0.2136 | 0.1018 | 0.1476 | -0.348 | -0.005 | 0.1179 | -0.245 | -0.354 | -0.257 |
| PCHAS_131180 | 0.0986 | 0.1584 | 0.2775 | 0.264  | -0.011 | -0.205 | 0.0511 | -0.195 | -0.174 | -0.649 | -0.413 | -0.92  |
| PCHAS_134820 | 0.2778 | 0.3904 | 0.0639 | 0.0684 | 0.0444 | -0.238 | 0.6302 | -0.239 | -0.216 | -0.311 | 0.0029 | -0.406 |
| PCHAS_135460 | -0.625 | -0.56  | -0.153 | -0.083 | 0.0932 | 0.0247 | 0.8872 | 0.5544 | 0.1366 | -0.265 | 0.4632 | -0.601 |
| PCHAS_070690 | 0.4951 | 0.1366 | -0.018 | -0.11  | -0.158 | -0.013 | -0.03  | -0.117 | -0.035 | -0.086 | 1.3845 | 0.3175 |
| PCHAS_134860 | 0.5789 | 0.5592 | 0.6722 | 0.355  | 0.1337 | -0.456 | -0.404 | -0.269 | -0.462 | -0.968 | -1.352 | -0.552 |
| PCHAS_080350 | -0.256 | 0.0459 | -0.079 | 0.0711 | 0.1167 | 0.1284 | -0.261 | 0.2782 | 0.1747 | 0.2831 | -0.322 | 0.0433 |
| PCHAS_050160 | -0.639 | 0.0025 | 0.2797 | 0.4698 | 0.2757 | 0.2817 | 0.3771 | -0.059 | 0.3048 | -0.529 | -0.075 | -0.5   |
| PCHAS_080400 | -0.287 | -0.016 | 0.1913 | 0.1548 | 0.0542 | 0.4313 | -0.019 | 0.0924 | 0.3246 | 0.909  | -0.2   | 0.4147 |
| PCHAS_092100 | 0.1042 | 0.1049 | 0.5299 | 0.3969 | 0.4572 | -0.193 | -0.324 | -0.02  | -0.05  | -0.391 | -0.069 | -0.053 |
| PCHAS_103050 | 0.9793 | 0.2677 | 0.4331 | -0.249 | -0.135 | -0.673 | -0.221 | -0.634 | -0.619 | -0.711 | 0.476  | -0.49  |
| PCHAS_111570 | -0.676 | -1.107 | -0.853 | -0.196 | 0.2404 | 0.3628 | 1.2056 | 0.8189 | 0.3731 | 0.3202 | 0.0604 | 0.1034 |
| PCHAS_144750 | 0.5432 | 0.5328 | 0.7267 | 0.1314 | 0.0912 | 0.5208 | -0.217 | -0.075 | -0.201 | -0.369 | 0.275  | -0.294 |
| PCHAS_103510 | 0.7102 | 0.446  | 0.4436 | -0.033 | -0.031 | 0.0846 | -0.213 | -0.371 | -0.129 | -0.861 | -0.289 | -0.801 |
| PCHAS_050890 | -0.492 | 0.5071 | 0.4877 | 0.3685 | 0.1498 | -0.031 | 0.0743 | 0.0742 | -0.08  | -0.896 | -0.146 | -0.529 |
| PCHAS_113900 | -0.278 | 0.2138 | 0.2957 | 0.5789 | 0.2399 | -0.336 | 0.5502 | 0.1486 | -0.356 | -0.547 | -1.073 | -0.563 |
| PCHAS_082710 | -0.459 | 0.3076 | 0.4422 | 0.1904 | 0.1565 | -0.14  | 0.2339 | -0.115 | 0.0523 | -0.876 | -1.354 | -0.21  |
| PCHAS_080600 | 0.0326 | 0.3782 | 0.193  | 0.6503 | 0.2509 | 0.0706 | -0.335 | -0.79  | 0.2089 | -1.522 | -1.251 | -0.89  |
| PCHAS_070620 | 0.3265 | 0.1511 | 0.5847 | -0.052 | -0.016 | -0.28  | 0.3879 | 0.0961 | -0.108 | -0.241 | 0.0329 | -0.349 |
| PCHAS_093430 | 0.8745 | 0.7566 | 0.5261 | 0.3874 | -0.006 | -0.203 | -0.743 | -0.797 | -0.296 | -1.723 | -0.694 | -0.943 |
| PCHAS_072680 | -0.921 | -0.445 | -0.429 | -0.467 | -0.328 | 0.0607 | 0.1683 | 0.8414 | 0.0037 | 0.8049 | 0.6708 | 0.6363 |
| PCHAS_072170 | -0.929 | 0.0527 | 0.0166 | -0.317 | 0.0806 | 0.2206 | -0.168 | 0.2672 | 0.2581 | 0.0826 | -0.273 | 0.1002 |
| PCHAS_052310 | 0.3731 | 0.5813 | 0.0972 | 0.5127 | 0.039  | 0.2727 | 0.3454 | 0.2687 | 0.2967 | -0.204 | -0.098 | 0.0338 |
| PCHAS_110970 | -0.01  | 1.1692 | 0.3412 | 0.1897 | -0.105 | 0.1928 | 1.0474 | -0.173 | -0.106 | -0.926 | -0.747 | -0.947 |
| PCHAS_031290 | 0.3081 | 0.1897 | 0.1963 | 0.0698 | 0.0016 | -0.184 | -0.351 | -0.335 | -0.236 | -0.965 | -0.717 | -0.837 |
| PCHAS_101960 | 0.01   | 0.0591 | -0.1   | -0.025 | 0.1779 | 0.718  | 0.1932 | 0.8243 | 0.0345 | 0.4899 | 0.5203 | 0.772  |
| PCHAS_136090 | -0.202 | -0.523 | -0.415 | -0.641 | -0.037 | 0.6833 | 0.0515 | 0.3348 | 0.2749 | 0.6372 | 0.0153 | 0.2322 |
| PCHAS_070570 | -1.019 | -0.779 | -0.951 | -0.023 | -0.003 | -0.006 | 0.3061 | 0.927  | 0.4185 | 0.1283 | 0.2091 | -0.073 |
| PCHAS_051330 | 0.2974 | 0.765  | 0.7355 | 0.268  | 0.1181 | -0.372 | -0.723 | -0.923 | -0.515 | -1.205 | -1.052 | -0.71  |
| PCHAS_020660 | -0.773 | -0.082 | 0.1273 | -0.317 | -0.049 | 0.0258 | 0.984  | 0.7787 | 0.0955 | 0.2481 | 0.5396 | 0.0014 |
| PCHAS_080500 | 0.4767 | 0.4112 | 0.4867 | 0.2125 | 0.0455 | -0.509 | -0.206 | -0.639 | -0.441 | -1.034 | -0.865 | -0.798 |
| PCHAS_050960 | -0.013 | 0.2269 | -0.573 | 0.5666 | -0.312 | -0.025 | 0.1246 | 0.2861 | -0.047 | -0.033 | 0.1486 | 0.1785 |

|              |        |        |        |        |        |        |        |        |        |        |        |        |
|--------------|--------|--------|--------|--------|--------|--------|--------|--------|--------|--------|--------|--------|
| PCHAS_102550 | 0.1729 | 0.2371 | 0.5444 | -0.112 | 0.1494 | -0.053 | 1.2326 | 0.1764 | 0.0727 | -0.374 | -0.079 | -0.52  |
| PCHAS_113350 | 0.5533 | 0.5501 | 0.2127 | 0.3423 | -0.175 | -0.385 | -0.812 | -1.253 | -0.34  | -1.891 | -0.966 | -1.08  |
| PCHAS_104040 | -1.032 | -0.66  | -0.244 | 0.0297 | 0.1444 | 0.3006 | 0.6716 | 0.4056 | 0.2781 | -0.141 | -0.472 | -0.294 |
| PCHAS_145050 | 0.2277 | 0.2773 | 0.3985 | 0.2973 | 0.3273 | -0.213 | -0.31  | -0.645 | -0.074 | -1.127 | -1.381 | -0.876 |
| PCHAS_113750 | -0.959 | -0.789 | -0.663 | -0.666 | -0.292 | 0.072  | 0.5606 | 0.8384 | 0.1686 | 0.9623 | 0.8994 | 0.4759 |
| PCHAS_041000 | 0.4199 | 0.3513 | 0.9809 | 0.6676 | 0.3173 | -0.145 | -1     | -0.633 | -0.184 | -1.491 | -0.894 | -0.938 |
| PCHAS_030560 | 0.3001 | 0.8565 | 0.4254 | 0.2099 | 0.0401 | -0.034 | -0.347 | -0.077 | -0.052 | -0.229 | -1.114 | -0.459 |
| PCHAS_100450 | 0.4473 | -0.025 | -0.117 | -0.256 | -0.072 | 0.5983 | 0.0845 | 0.0635 | 0.2592 | 0.6858 | 0.5001 | 0.5832 |
| PCHAS_000520 | -0.801 | -1.369 | -1.054 | -1.4   | -0.395 | 0.2135 | 0.9007 | 0.9632 | 0.1658 | 1.3152 | 1.1981 | 1.0532 |
| PCHAS_132210 | -0.241 | -0.598 | 0.1439 | 0.0726 | 0.0925 | -0.112 | 0.5418 | 0.5026 | 0.1488 | -0.306 | 0.4444 | -0.071 |
| PCHAS_090650 | 0.0512 | 0.0279 | -0.133 | -0.276 | -0.088 | -0.09  | 0.0647 | -0.225 | -0.049 | 0.2275 | 0.6996 | 0.5993 |
| PCHAS_061130 | 0.1882 | -0.191 | 0.044  | -0.297 | 0.3498 | -0.619 | -0.069 | 0.169  | -0.512 | -0.343 | -0.83  | 0.1741 |
| PCHAS_121290 | 0.52   | -0.707 | -0.358 | -1.294 | 0.0005 | 0.37   | 0.064  | -0.857 | -0.348 | 1.4495 | 1.2281 | 0.8776 |
| PCHAS_143890 | 0.0371 | 0.3177 | 0.4109 | 0.4322 | 0.2062 | -0.289 | 0.1045 | -0.526 | -0.38  | -0.527 | -0.528 | -0.561 |
| PCHAS_072510 | -0.367 | -0.683 | -0.347 | -0.164 | 0.2802 | 0.8582 | 0.2511 | 0.6562 | 0.8689 | 0.2739 | -0.649 | 0.0076 |
| PCHAS_080210 | -0.172 | -0.157 | -0.098 | -0.358 | -0.095 | -0.101 | -0.276 | -0.229 | -0.202 | 0.4985 | 0.0113 | 0.0112 |
| PCHAS_060870 | -0.884 | -0.489 | -0.101 | 0.1967 | 0.2288 | 0.5328 | -0.35  | 0.5837 | 0.5067 | -0.187 | -1.018 | -0.555 |
| PCHAS_091980 | -0.617 | -0.393 | 0.4518 | 0.1497 | 0.4672 | 0.256  | 0.9295 | 0.2145 | 0.0807 | -0.579 | -0.038 | -0.861 |
| PCHAS_080390 | -0.186 | -0.032 | 0.2259 | 0.3551 | 0.243  | 0.1679 | 0.106  | -0.037 | 0.1845 | -0.626 | -0.925 | -0.223 |
| PCHAS_101660 | -0.55  | -0.327 | -1.06  | 0.3801 | -0.459 | 0.6695 | -0.087 | 0.092  | 0.2982 | 0.6437 | 0.3103 | 0.443  |
| PCHAS_082930 | -0.19  | 0.3883 | 0.886  | 0.3727 | 0.1561 | 0.124  | 0.928  | -0.012 | -0.1   | -1.032 | -0.474 | -0.445 |
| PCHAS_122860 | 0.7093 | 0.365  | -0.779 | 0.4509 | -0.012 | 0.1649 | 0.478  | -0.856 | 0.0959 | -0.444 | -0.05  | -0.042 |
| PCHAS_120700 | 0.328  | 0.2466 | -5E-04 | -0.005 | 0.1783 | 0.0625 | -0.588 | -0.329 | -0.002 | 0.0729 | -0.526 | 0.2859 |
| PCHAS_144690 | 0.0648 | 0.2783 | 0.409  | 0.0728 | -0.193 | -0.315 | -0.055 | 0.1293 | -0.235 | -0.79  | -1.582 | -0.561 |
| PCHAS_082360 | -0.12  | 0.486  | 0.0903 | 0.5376 | 0.3205 | 0.435  | 0.316  | -0.12  | 0.3945 | -1.714 | -0.321 | -0.763 |
| PCHAS_141770 | -0.519 | -0.283 | 0.1879 | 0.1591 | 0.2445 | 0.1216 | 0.5178 | 0.4596 | -0.04  | -0.353 | 0.1382 | -0.111 |
| PCHAS_052050 | 0.6422 | 0.2586 | 0.6618 | 0.2289 | 0.1044 | 0.7026 | 0.1887 | -0.306 | 0.1731 | -0.297 | -0.058 | -0.268 |
| PCHAS_133290 | 0.2892 | 0.2763 | 0.0725 | 0.3283 | 0.0315 | -0.128 | -0.199 | -0.161 | -0.056 | -0.667 | -0.287 | -0.542 |
| PCHAS_071930 | -0.777 | -0.743 | -1.087 | -0.786 | -0.36  | 0.0378 | 0.4179 | -0.152 | 0.1021 | 0.7753 | 1.6968 | 0.4381 |
| PCHAS_142610 | 0.8118 | 0.4829 | -0.17  | 0.683  | 0.1334 | 0.1295 | -0.272 | -0.504 | 0.0091 | -1.21  | -0.517 | -0.507 |
| PCHAS_021280 | -0.762 | -0.587 | -0.699 | -0.172 | 0.2772 | 0.5028 | 0.4829 | 0.5082 | 0.5925 | 0.3835 | -0.032 | 0.373  |
| PCHAS_040620 | 0.2748 | 0.0345 | 0.0275 | 0.3363 | 0.0541 | -0.244 | -0.008 | 0.3228 | -0.25  | -0.295 | 0.111  | -0.314 |
| PCHAS_120730 | -1.02  | -0.604 | -0.225 | 0.0949 | 0.2756 | 0.5292 | 1.1533 | 0.2878 | 0.5606 | 0.2611 | -0.417 | 0.148  |
| PCHAS_100430 | 0.5317 | 0.5441 | 0.2675 | 0.2348 | 0.1061 | -0.083 | -0.139 | -0.338 | -0.017 | -1.21  | -0.989 | -0.657 |
| PCHAS_124340 | -0.579 | -0.771 | -1.347 | -0.333 | -0.366 | 0.2997 | 0.536  | -0.594 | 0.2102 | 1.2133 | 1.22   | 1.0336 |
| PCHAS_101080 | -0.269 | -0.152 | 0.3084 | 0.0035 | 0.4236 | -0.442 | 1.8158 | -0.157 | -0.134 | -0.535 | -0.329 | -0.294 |
| PCHAS_141430 | -0.245 | -0.184 | 0.2523 | -0.463 | 0.3891 | -0.56  | -0.355 | -0.496 | -0.608 | -1.231 | -1.019 | -0.977 |
| PCHAS_050480 | 0.3518 | 0.4908 | 0.8066 | 0.8231 | 0.2266 | 0.7842 | -0.525 | -0.575 | 0.2885 | -1.45  | -0.053 | -0.501 |
| PCHAS_141520 | -0.903 | -0.017 | -0.981 | 0.6296 | -0.57  | 0.5238 | 0.578  | -0.213 | 0.6691 | -0.352 | 0.2923 | 0.1584 |
| PCHAS_123330 | -0.428 | -1.532 | -0.974 | -1.023 | -0.305 | -0.243 | -0.203 | -0.051 | -0.24  | 1.5725 | 1.2819 | 0.7323 |
| PCHAS_145480 | 0.3165 | 0.4591 | 0.5405 | 0.9591 | 0.0572 | -0.209 | -0.483 | -1.223 | -0.426 | -1.675 | -1.436 | -1.064 |
| PCHAS_131790 | -0.387 | 0.6199 | 0.106  | 0.1017 | 0.1869 | -0.352 | -0.102 | -0.459 | -0.269 | -1.635 | -0.209 | -0.639 |
| PCHAS_062150 | -0.031 | 1.0488 | 0.4221 | 0.4301 | -0.029 | -0.193 | -0.493 | -0.77  | -0.496 | -0.821 | -0.921 | -0.505 |
| PCHAS_111240 | -0.017 | -0.374 | -0.493 | -0.403 | -0.306 | 0.0405 | -0.478 | -0.398 | -0.05  | 0.7816 | 1.3104 | 0.6638 |
| PCHAS_134490 | 0.6105 | 0.515  | 0.5056 | -0.222 | -0.231 | -0.589 | -0.179 | -0.839 | -0.497 | -1.11  | -0.207 | -0.822 |
| PCHAS_135730 | 0.1959 | 0.3518 | 0.4589 | -0.691 | -0.412 | -0.689 | 0.1179 | -0.424 | -0.643 | -0.129 | -0.062 | 0.2533 |
| PCHAS_103680 | 0.2892 | 0.4633 | 0.3323 | 0.2415 | -0.006 | 0.1843 | -0.607 | -0.458 | 0.055  | -0.629 | -0.637 | -0.255 |
| PCHAS_082570 | 0.0046 | -0.524 | -0.854 | -0.385 | -0.062 | 0.135  | -0.39  | 0.1889 | 0.0454 | 1.1395 | 1.5283 | 1.0037 |
| PCHAS_132040 | 0.1463 | 0.1676 | 0.144  | 0.1326 | 0.0085 | -0.06  | 0.0445 | 0.1179 | -0.112 | -0.258 | -0.561 | -0.242 |
| PCHAS_141280 | -0.368 | 0.3185 | 0.4587 | 0.6823 | 0.2869 | -0.076 | -0.103 | -0.403 | -0.03  | -0.702 | -0.273 | -0.751 |

|              |        |        |        |        |        |        |        |        |        |        |        |        |
|--------------|--------|--------|--------|--------|--------|--------|--------|--------|--------|--------|--------|--------|
| PCHAS_132760 | 0.2745 | -0.912 | -0.913 | -1.346 | -0.771 | -0.524 | -0.751 | -0.733 | -0.502 | 1.5184 | 2.2398 | 1.5571 |
| PCHAS_145230 | -0.365 | -0.104 | 0.35   | 0.3321 | 0.1611 | -0.368 | 0.5825 | -0.495 | -0.585 | -1.384 | -1.423 | -0.969 |
| PCHAS_030860 | -0.196 | -0.05  | 0.538  | 0.1972 | 0.1209 | 0.3407 | 0.1161 | 0.2666 | 0.3947 | -0.218 | 0.0199 | 0.0324 |
| PCHAS_090880 | 0.2145 | -0.236 | -0.195 | -0.306 | 0.0046 | 0.4231 | -0.631 | 0.2588 | 0.3986 | 0.8033 | 0.0694 | 0.6552 |
| PCHAS_123120 | -0.157 | 0.3014 | 0.2939 | 0.3046 | -0.101 | -0.065 | -0.267 | -0.164 | -0.023 | -0.55  | -0.971 | -0.405 |
| PCHAS_142220 | -0.25  | -0.116 | 0.366  | -0.411 | -0.039 | 0.1231 | 0.1767 | 0.3779 | -0.12  | 0.2476 | 0.3517 | -0.236 |
| PCHAS_041520 | -0.331 | -0.901 | -0.598 | -0.887 | -0.224 | 0.5042 | 0.1889 | 0.722  | 0.4257 | 1.3057 | 0.987  | 1.1375 |
| PCHAS_061830 | -1.062 | -0.84  | -0.906 | -0.372 | 0.2946 | 0.2361 | 0.7633 | 1.2294 | 0.2605 | 0.7938 | 0.7858 | 0.6343 |
| PCHAS_146350 | -0.012 | 0.128  | 0.1737 | -0.041 | -0.076 | 0.0395 | 0.5582 | 0.2377 | 0.1084 | -0.263 | 0.5509 | -0.43  |
| PCHAS_081270 | -0.366 | 0.1675 | 0.4663 | 0.2292 | 0.1633 | 0.0737 | -0.221 | -0.104 | 0.1325 | -0.315 | -1.026 | -0.154 |
| PCHAS_143820 | 0.1008 | -0.657 | -0.338 | -0.5   | 0.0542 | 0.502  | -0.101 | 0.2461 | 0.2768 | 1.0286 | 0.4861 | 0.5328 |
| PCHAS_143670 | 0.2955 | -0.061 | -0.198 | -0.193 | -0.117 | 0.148  | -0.46  | -0.04  | 0.0842 | 0.6755 | 0.0608 | 0.6324 |
| PCHAS_123780 | -0.342 | -1.368 | -1.857 | -1.26  | -0.84  | 0.051  | -0.673 | -0.602 | 0.0709 | 1.937  | 1.6741 | 1.6927 |
| PCHAS_001020 | 0.772  | 0.4744 | 0.1528 | 0.3173 | -0.263 | -0.218 | -0.602 | -0.013 | -0.255 | 0.2332 | 1.5286 | 0.1251 |
| PCHAS_061380 | -0.339 | 0.1536 | 0.3499 | 0.338  | 0.0476 | -0.323 | 0.1955 | -0.046 | -0.208 | -0.717 | -1.045 | -0.558 |
| PCHAS_051450 | 0.5319 | -0.238 | 0.3723 | 0.4988 | 0.1496 | 0.0337 | 0.4375 | -0.586 | 0.1399 | -1.299 | -1.711 | -1.18  |
| PCHAS_144090 | -0.665 | 0.3657 | 0.2793 | 0.5176 | 0.336  | 0.2406 | -0.457 | 0.1399 | 0.0024 | -0.416 | -0.777 | -0.417 |
| PCHAS_144160 | -0.517 | 0.0294 | 0.4461 | 0.3963 | 0.2362 | 0.7166 | 0.0528 | 0.5148 | 0.7092 | 0.3544 | -0.159 | 0.1401 |
| PCHAS_134130 | 0.4601 | 0.5036 | 0.3012 | 0.2423 | 0.2943 | 0.2309 | 0.452  | 0.1347 | 0.135  | -0.946 | -0.75  | 0.1267 |
| PCHAS_093100 | -0.198 | -0.82  | -1.324 | -1.885 | -0.945 | -0.226 | -0.928 | -1.206 | -0.256 | 1.4163 | 1.922  | 1.7603 |
| PCHAS_112570 | -0.712 | 0.1946 | 0.6241 | 0.1305 | 0.3522 | 0.0535 | 0.2192 | -0.189 | 0.1833 | -1.17  | -0.426 | -1.146 |
| PCHAS_144320 | -0.366 | 0.0447 | 0.1423 | -0.081 | -0.054 | -0.193 | 0.3441 | 0.4018 | -0.293 | 0.1784 | 0.0147 | -1E-04 |
| PCHAS_102570 | -0.9   | -1.438 | -1.541 | -0.87  | -0.078 | 0.6084 | 0.839  | 0.9061 | 0.7147 | 0.8662 | 0.1652 | 0.5088 |
| PCHAS_102950 | -1.035 | -0.618 | -0.551 | -0.684 | 0.0196 | 0.2509 | 0.0124 | 0.4569 | 0.0455 | 0.8395 | 0.6186 | 0.3978 |
| PCHAS_020980 | 0.0953 | 0.0922 | 0.2126 | 0.1593 | 0.0937 | 0.506  | -0.075 | 0.0586 | 0.2789 | 0.2061 | 0.4401 | 0.3226 |
| PCHAS_124270 | 0.5659 | 0.5545 | 0.1531 | 0.2459 | -0.052 | -0.238 | -0.096 | -0.514 | -0.335 | -0.833 | -0.093 | -0.587 |
| PCHAS_071200 | 0.7517 | -0.337 | -0.158 | -0.378 | 0.0209 | 0.7154 | -0.42  | 0.092  | 0.4042 | 1.5718 | 0.622  | 1.003  |
| PCHAS_135970 | 0.0071 | 0.318  | 0.0138 | 0.1983 | 0.001  | -0.161 | -0.452 | -0.477 | -0.018 | -1.527 | -1.227 | -0.773 |
| PCHAS_135810 | 0.4378 | -0.034 | 0.055  | -0.381 | -0.124 | -0.289 | 0.6933 | -0.059 | -0.499 | -0.827 | 0.2771 | -0.388 |
| PCHAS_135640 | -1.259 | -0.514 | -0.009 | -0.066 | 0.1966 | 0.2298 | 0.6431 | 0.5193 | 0.3735 | -0.132 | -0.15  | -0.277 |
| PCHAS_091090 | -0.213 | 0.0866 | 0.1209 | 0.1535 | -0.013 | -0.122 | -0.057 | -0.042 | -0.214 | -0.541 | -0.092 | -0.698 |
| PCHAS_031750 | 0.454  | 0.2337 | 0.2079 | 0.1194 | -0.069 | -0.137 | -0.374 | -0.139 | -0.098 | -0.437 | -0.426 | -0.303 |
| PCHAS_141610 | 0.1367 | 0.4137 | 0.4168 | 0.026  | 0.1247 | 0.2864 | 0.7174 | -0.108 | -0.454 | -0.075 | -0.377 | -0.39  |
| PCHAS_135310 | 0.2693 | 0.237  | 0.1636 | 0.3132 | 0.193  | 0.2819 | 0.1875 | -0.015 | 0.3103 | -0.542 | -0.174 | -0.359 |
| PCHAS_060240 | 0.3409 | 0.4649 | 0.4007 | 0.0543 | 0.0856 | -0.161 | -0.306 | -0.498 | -0.425 | -0.757 | -0.237 | -0.44  |
| PCHAS_144470 | 0.9987 | 0.6925 | 1.0035 | 0.2782 | 0.0349 | 0.2529 | -1.208 | -0.174 | -0.196 | -0.773 | 0.1749 | -0.427 |
| PCHAS_010120 | -0.141 | 0.2644 | -0.141 | -0.096 | 0.0095 | -0.201 | -0.004 | 0.2383 | -0.215 | -0.301 | 0.1013 | -0.145 |
| PCHAS_040810 | 1.2718 | 0.3576 | 0.2623 | 0.3267 | 0.0853 | -0.367 | 0.2024 | 0.2771 | -0.248 | -0.45  | -0.556 | -0.22  |
| PCHAS_102350 | 0.6786 | -0.244 | 0.3631 | 0.0151 | 0.1997 | -0.466 | -0.047 | 0.6823 | -0.313 | 0.0411 | 0.0674 | 0.066  |
| PCHAS_142160 | 0.1125 | -0.12  | -0.174 | -0.227 | -0.076 | -0.169 | -0.053 | -0.002 | -0.028 | 0.5281 | 0.229  | 0.415  |
| PCHAS_146550 | -1.128 | 0.1914 | 0.2744 | -0.013 | 0.0272 | -0.287 | -0.065 | -0.062 | -0.019 | 0.1294 | -0.619 | -0.473 |
| PCHAS_121150 | 0.0684 | 1.0505 | 0.6369 | 1.2782 | 0.1234 | -0.815 | -0.994 | -1.215 | -0.364 | -0.915 | -0.823 | -1.748 |
| PCHAS_042020 | 0.0667 | 0.4478 | 0.1734 | -0.121 | -0.258 | -0.432 | -0.702 | -0.502 | -0.705 | -0.832 | -0.132 | -0.484 |
| PCHAS_081860 | 0.2822 | -0.884 | -0.446 | -1.043 | -1.001 | -0.128 | 0.1727 | 0.0408 | -0.158 | 1.9069 | 2.4371 | 1.4007 |
| PCHAS_113300 | -0.357 | 0.2425 | 0.0894 | 0.3616 | 0.0331 | 0.5114 | -0.224 | -0.653 | 0.158  | -1.159 | -0.74  | -0.547 |
| PCHAS_101840 | -0.307 | 0.4137 | 0.0529 | 0.5593 | 0.3914 | 0.1183 | -1.122 | -0.464 | 0.0391 | -1.187 | -1.528 | -0.763 |
| PCHAS_081420 | -0.723 | -0.321 | 0.2492 | -0.002 | 0.0469 | 0.1798 | 0.3387 | 0.329  | 0.1821 | -0.433 | -0.471 | -0.259 |
| PCHAS_072280 | 0.1948 | 0.3497 | 0.8628 | 0.7281 | 0.2327 | 0.2356 | 0.1685 | -0.588 | -0.193 | -0.154 | 0.0095 | -0.093 |
| PCHAS_070960 | 0.1754 | -0.389 | -0.301 | -0.316 | -0.226 | 0.264  | 0.3646 | -0.087 | 0.15   | 0.1779 | 0.3133 | 0.0971 |
| PCHAS_031120 | -0.216 | 0.3219 | 0.2647 | 0.1633 | 0.2758 | 0.3982 | 0.3533 | 0.0606 | 0.017  | -0.66  | 0.27   | 0.0158 |

|              |        |        |        |        |        |        |        |        |        |        |        |        |
|--------------|--------|--------|--------|--------|--------|--------|--------|--------|--------|--------|--------|--------|
| PCHAS_051240 | -0.224 | -0.567 | -0.342 | -0.554 | -0.275 | -0.192 | 0.1788 | 0.6373 | -0.096 | 0.7691 | 0.9588 | 0.7598 |
| PCHAS_100910 | -0.98  | -0.527 | -0.751 | -0.275 | 0.2609 | 0.2102 | 0.7105 | 0.3625 | 0.4078 | -0.221 | -0.649 | -0.172 |
| PCHAS_090470 | 0.3044 | 0.6272 | 0.2647 | 1.3877 | 0.2158 | -0.053 | -1.773 | -1.003 | -0.132 | -1.697 | -2.194 | -1.36  |
| PCHAS_092900 | 0.5966 | 0.6575 | 0.4203 | -0.133 | -0.159 | -0.644 | -0.768 | 0.1136 | -0.244 | 0.7109 | 0.2264 | 0.4686 |
| PCHAS_072570 | -0.491 | -1.094 | -0.689 | -0.845 | -0.312 | 0.0742 | 0.3328 | 0.3749 | -0.113 | 1.2579 | 1.2389 | 1.2144 |
| PCHAS_113710 | 0.4189 | 0.4498 | 0.5474 | 0.3272 | 0.1786 | -0.039 | 0.1542 | 0.7248 | -0.142 | 0.2756 | 0.7985 | 0.3628 |
| PCHAS_114380 | -0.222 | -0.679 | 0.7587 | -0.553 | -0.361 | -0.05  | 0.9266 | 0.277  | -0.206 | 0.4503 | 0.712  | -0.195 |
| PCHAS_146540 | 0.5378 | 0.1307 | -0.297 | -0.148 | -0.12  | -0.289 | -0.345 | -0.281 | -0.381 | 0.2743 | 0.3276 | 0.3112 |
| PCHAS_134180 | 0.2462 | -0.252 | -0.09  | -0.234 | -0.301 | -0.291 | 0.0476 | -0.119 | -0.257 | 0.3509 | 0.2818 | 0.2469 |
| PCHAS_113020 | -0.81  | -0.604 | -0.1   | 0.3892 | -0.119 | 0.2666 | 0.2838 | 0.0504 | 0.2599 | -0.139 | -0.056 | -0.274 |
| PCHAS_083410 | 0.4918 | 0.5245 | 0.6565 | 0.352  | 0.1402 | 0.7094 | -0.109 | -0.203 | 0.3268 | -0.4   | -0.524 | -0.398 |
| PCHAS_143290 | -0.595 | 0.0713 | 0.3242 | 0.3797 | 0.4006 | -0.019 | 0.5365 | 0.1398 | 0.0016 | -0.73  | 0.0994 | -0.603 |
| PCHAS_114280 | 1.0239 | 0.2169 | 0.0327 | 0.1485 | -0.206 | -0.621 | -0.744 | -0.893 | -0.763 | -1.675 | -0.565 | -0.892 |
| PCHAS_010750 | -0.189 | -0.343 | -1.048 | -0.424 | -0.893 | -0.765 | -0.254 | 0.0773 | -0.681 | -0.445 | 0.4261 | -0.092 |
| PCHAS_145700 | 0.0944 | 0.4209 | 0.6219 | 0.2421 | 0.1049 | -0.212 | -0.28  | -0.161 | -0.012 | -0.749 | -0.238 | -0.746 |
| PCHAS_124060 | 0.1832 | 0.11   | 0.3134 | -0.079 | -0.102 | -0.213 | 0.4176 | 0.2579 | -0.391 | -0.078 | -0.865 | -0.118 |
| PCHAS_136080 | -0.166 | -1.298 | -1.453 | -1.427 | -0.253 | 0.3785 | 0.274  | -0.046 | 0.3431 | 0.3793 | 0.6402 | 0.4692 |
| PCHAS_145030 | 0.3327 | -0.09  | -0.845 | 0.8505 | 0.361  | -0.079 | -0.685 | -0.413 | -0.041 | -0.696 | -0.631 | -0.705 |
| PCHAS_131840 | -0.163 | -0.049 | 0.2103 | -0.004 | 0.0115 | 0.1483 | 0.8273 | 0.4187 | 0.2408 | -0.065 | -0.092 | -0.311 |
| PCHAS_136380 | 0.934  | 0.5158 | -0.061 | -0.18  | -0.118 | -0.474 | -0.298 | -0.826 | -0.41  | -1.045 | -0.526 | -0.54  |
| PCHAS_112080 | -0.468 | 0.0948 | 0.2771 | 0.4071 | 0.3368 | 0.1375 | 0.9951 | 0.1369 | -0.016 | -0.8   | -0.169 | -0.533 |
| PCHAS_080440 | 0.318  | 0.3199 | 0.1707 | 0.6168 | 0.3056 | -0.178 | -0.722 | -0.484 | -0.07  | -1.981 | -1.521 | -1.564 |
| PCHAS_122120 | 0.2906 | -0.094 | 0.7424 | 0.0947 | 0.2356 | 0.2189 | 0.2454 | 0.2607 | 0.148  | -0.091 | -0.364 | -0.012 |
| PCHAS_040730 | 0.1239 | 0.0119 | -0.226 | -0.175 | -0.087 | 0.3077 | 0.3239 | -0.287 | 0.1788 | 0.5442 | 0.2802 | 0.2808 |
| PCHAS_141800 | 0.5992 | 0.3508 | 0.4923 | -0.054 | -0.143 | -0.3   | -0.047 | -0.075 | -0.356 | -0.314 | 0.435  | -0.404 |
| PCHAS_072920 | 0.4146 | 0.4656 | 0.1125 | 0.2678 | -0.152 | -0.667 | -0.553 | -0.772 | -0.506 | -0.433 | -0.285 | -0.228 |
| PCHAS_122440 | -0.102 | 0.328  | 0.0516 | 0.3343 | -0.012 | -0.008 | 0.2069 | -0.494 | -0.201 | -0.525 | -0.669 | -0.316 |
| PCHAS_122990 | 0.1472 | -0.121 | 0.0108 | 1.3575 | 0      | -0.317 | -0.123 | -0.282 | -0.255 | -0.627 | -0.53  | -0.561 |
| PCHAS_111200 | -0.17  | 0.3337 | 0.375  | 0.3351 | -0.038 | -0.094 | -0.273 | -0.15  | -0.322 | -0.569 | -0.112 | -0.219 |
| PCHAS_011170 | 0.4855 | -0.104 | 0.1689 | -0.833 | -0.413 | -0.562 | -0.044 | 0.0117 | -0.674 | 0.1999 | 0.8271 | 0.1642 |
| PCHAS_133100 | 0.4072 | -0.265 | -0.346 | -0.436 | -0.203 | -0.051 | -0.648 | -0.549 | -0.044 | 0.9903 | 1.7255 | 0.9092 |
| PCHAS_010820 | 0.3111 | 0.3769 | 0.1531 | 0.2146 | -0.006 | 0.1129 | -0.328 | -0.126 | -0.09  | -0.033 | -0.224 | -0.005 |
| PCHAS_131770 | 0.1875 | 0.0633 | 0.2139 | 0.2679 | 0.3902 | -0.038 | -0.136 | -0.31  | -0.074 | -0.442 | -0.993 | -0.257 |
| PCHAS_020340 | 1.0711 | 0.2202 | 0.4617 | -1.185 | -0.534 | -0.737 | -1.148 | -0.842 | -0.841 | -0.105 | 1.4639 | 0.1844 |
| PCHAS_143070 | 0.2195 | 0.1033 | -1.014 | 0.6168 | 0.1177 | 0.354  | 0.2214 | 0.2004 | 0.3081 | -0.213 | 0.3349 | -0.117 |
| PCHAS_041810 | -0.609 | -0.115 | 0.4411 | -0.094 | 0.311  | 0.5264 | 0.3582 | 0.3543 | -0.019 | 0.5546 | 0.4662 | 0.8264 |
| PCHAS_050590 | -0.214 | 0.2964 | -0.013 | -0.01  | 0.052  | -0.131 | 0.0304 | 0.3388 | 0.0149 | 0.101  | 0.5996 | 0.0146 |
| PCHAS_072330 | -0.672 | 0.188  | 0.0982 | 0.5199 | -0.044 | -0.03  | -0.878 | -0.456 | 0.0027 | -1.623 | -2.082 | -1.162 |
| PCHAS_091300 | -0.584 | -0.117 | -0.038 | 0.0214 | -0.125 | 0.4615 | -0.029 | 0.2595 | 0.0256 | -0.035 | -0.388 | -0.225 |
| PCHAS_123820 | 0.1649 | 0.5825 | 0.2105 | 0.1489 | -0.246 | -0.091 | -0.249 | -1.032 | -0.441 | -0.929 | -0.607 | -0.27  |
| PCHAS_050090 | -1.661 | -1.768 | -1.601 | -0.908 | -0.551 | 0.3311 | 0.6542 | 1.4435 | 0.3166 | 0.9767 | 0.7071 | 0.293  |
| PCHAS_010330 | 0.2267 | -0.554 | -0.424 | -0.531 | -0.113 | 0.3227 | -0.141 | 0.2612 | 0.4998 | 1.3024 | 1.0664 | 1.0774 |
| PCHAS_081170 | 1.0356 | 0.6521 | 0.1167 | 0.2977 | -0.164 | 0.0843 | -0.396 | -0.227 | 0.0298 | -0.249 | -0.258 | 0.0472 |
| PCHAS_114480 | 0.1782 | 0.2736 | 0.3922 | 0.256  | 0.1144 | -0.15  | 0.2092 | 0.242  | -0.003 | -0.397 | -0.946 | -0.23  |
| PCHAS_101240 | -0.221 | -0.985 | 0.1957 | -1.013 | 0.0068 | -0.049 | 1.3168 | 0.4668 | -0.111 | 0.8327 | 1.1896 | 0.5269 |
| PCHAS_135360 | -1.008 | -1.677 | -3.103 | -1.686 | -0.502 | 0.2363 | 0.1427 | 0.3522 | 0.1555 | 0.3773 | 0.8799 | -0.254 |
| PCHAS_131260 | 0.3552 | -0.222 | -0.186 | -0.13  | -0.124 | -0.211 | 0.0419 | 0.2687 | -0.272 | 0.6329 | 0.4485 | 0.4769 |
| PCHAS_041170 | -0.323 | 0.3656 | 0.013  | 0.3902 | 0.1208 | 0.1781 | -0.304 | -0.195 | 0.208  | -0.727 | -0.709 | -0.555 |
| PCHAS_090420 | -0.566 | 0.1626 | 0.2712 | 0.4891 | 0.4422 | -0.195 | -0.508 | -0.896 | -0.117 | -1.242 | -2.036 | -1.131 |
| PCHAS_103820 | -0.231 | 0.5071 | -0.319 | -0.21  | -0.271 | -0.159 | -0.068 | -0.288 | -0.113 | 0.301  | 2.6424 | 0.0204 |

|              |        |        |        |        |        |        |        |        |        |        |        |        |
|--------------|--------|--------|--------|--------|--------|--------|--------|--------|--------|--------|--------|--------|
| PCHAS_092860 | -0.338 | -0.409 | 0.5924 | -0.174 | 0.1388 | -0.329 | 0.5403 | 0.0232 | -0.222 | -0.427 | -0.012 | -0.155 |
| PCHAS_031170 | -0.277 | -0.129 | 0.372  | 0.1647 | 0.2187 | 0.2951 | 1.226  | 0.4647 | 0.4099 | -0.193 | 0.2355 | -0.374 |
| PCHAS_142140 | 0.482  | 0.3967 | 0.1489 | 0.0146 | -0.017 | -0.305 | -0.072 | 0.0557 | -0.342 | -0.39  | -0.331 | -0.352 |
| PCHAS_134970 | -0.297 | -0.025 | 0.3042 | 0.1596 | 0.2561 | 0.2505 | 0.6158 | 0.3066 | 0.2194 | 0.0927 | -0.211 | -0.09  |
| PCHAS_010830 | -0.68  | 0.1767 | -0.222 | -0.091 | 0.0893 | -0.109 | -0.487 | -0.198 | -0.204 | -0.434 | 0.3017 | -0.659 |
| PCHAS_143770 | 0.4958 | 0.0131 | 1.0269 | 0.2701 | 0.1069 | 0.1746 | 0.3563 | -0.44  | -0.113 | -0.778 | -0.297 | -0.585 |
| PCHAS_146440 | 0.2961 | 0.5919 | 0.5238 | -0.216 | 0.1492 | -0.301 | -0.837 | -0.84  | -0.367 | -0.136 | -0.582 | -0.172 |
| PCHAS_136510 | 0.1728 | -0.034 | -0.015 | -0.122 | -0.056 | -0.474 | -0.434 | -0.352 | -0.52  | 0.0367 | -0.065 | 0.3688 |
| PCHAS_061010 | -0.055 | 0.0349 | -0.148 | 0.0509 | -0.102 | -0.08  | 0.3385 | 0.3514 | -0.129 | 0.5178 | 0.2958 | 0.56   |
| PCHAS_111920 | 0.2948 | 0.1978 | 0.2731 | 0.0348 | 0.0239 | -0.272 | 0.2936 | 0.0703 | -0.368 | -0.647 | -0.552 | -0.421 |
| PCHAS_130380 | 0.4004 | 0.1967 | -0.52  | 0.3015 | 0.0329 | 0.3563 | 0.2015 | -0.197 | 0.5911 | 0.2588 | 0.115  | 0.1818 |
| PCHAS_092740 | -0.377 | 0.2368 | 0.3023 | -0.073 | -0.087 | 0.509  | -0.167 | 0.2788 | 0.1688 | 0.3864 | 0.1189 | 0.0527 |
| PCHAS_050540 | -0.222 | 0.3378 | 0.3739 | 0.0269 | -0.064 | -0.27  | 0.0045 | 0.2181 | -0.165 | 0.4975 | -0.02  | 0.2435 |
| PCHAS_050190 | 0.092  | 0.0047 | -0.089 | -0.589 | -0.368 | -0.504 | -0.084 | -0.087 | -0.412 | 0.8583 | 1.6223 | 0.4383 |
| PCHAS_090360 | 0.2873 | 0.7066 | -0.209 | 0.0412 | -0.668 | -0.115 | 0.0047 | 0.0066 | -0.305 | 0.542  | 0.4647 | 0.6728 |
| PCHAS_100980 | 0.8206 | -0.037 | -0.044 | 0.0788 | 0.2203 | -0.379 | 0.7855 | 0.0522 | -0.46  | -1.044 | -0.301 | -0.543 |
| PCHAS_020140 | -1.209 | -0.854 | -0.538 | -0.808 | -0.083 | 0.0528 | 1.1696 | 0.9827 | 0.2983 | 0.204  | -0.023 | -0.387 |
| PCHAS_080270 | -0.44  | -0.257 | -0.118 | 0.4244 | -0.094 | 0.1851 | -0.228 | 0.0892 | 0.1403 | -0.032 | -0.57  | -0.166 |
| PCHAS_134220 | 0.0508 | 0.0294 | 0.2164 | -0.229 | 0.0413 | 0.0847 | -0.194 | 0.172  | 0.2504 | 0.7207 | 0.2018 | 0.1486 |
| PCHAS_134810 | 0.286  | -0.737 | -0.471 | -1.167 | -0.067 | 0.6439 | -0.214 | -0.164 | 0.3688 | 1.6872 | 1.8665 | 1.2489 |
| PCHAS_146310 | 0.6783 | 0.5618 | 0.7672 | 0.2878 | 0.099  | -0.181 | -1.003 | -0.247 | -0.073 | -0.464 | 1.9876 | 0.0405 |
| PCHAS_062410 | 0.1166 | -0.683 | -0.343 | -0.42  | -0.161 | -0.16  | -0.321 | -0.11  | -0.081 | 0.0971 | 1.7997 | 0.756  |
| PCHAS_031730 | -0.743 | -0.093 | 0.238  | 0.3267 | 0.2638 | -0.062 | -0.366 | -0.503 | 0.3349 | -0.149 | -0.93  | -0.487 |
| PCHAS_135370 | -0.536 | -2.228 | -1.443 | -1.697 | -1.167 | -0.176 | -0.721 | -0.71  | -0.326 | -0.032 | 1.7439 | 0.0246 |
| PCHAS_103650 | -0.116 | -0.388 | 0.0592 | 0.2198 | 0.1598 | 0.4998 | 0.1726 | -0.241 | 0.5018 | 0.3818 | 1.8902 | 0.612  |
| PCHAS_122270 | 0.0285 | -0.075 | 0.1703 | 0.1189 | -0.19  | -0.139 | 0.1872 | 0.3947 | -0.18  | -0.192 | -0.842 | -0.029 |
| PCHAS_144060 | 0.2864 | -0.023 | -0.93  | 0.6568 | -0.299 | 0.1377 | 0.649  | 0.4193 | 0.4188 | -0.332 | -0.237 | 0.1697 |
| PCHAS_072800 | -0.112 | 0.1236 | 0.5904 | 0.3637 | 0.3155 | 0.1688 | -0.29  | 0.0446 | 0.0999 | -0.966 | -1.047 | -0.756 |
| PCHAS_000910 | -1.556 | -1.68  | -1.881 | -0.932 | -0.165 | 1.2106 | 0.3037 | 0.6116 | 1.0631 | 0.3426 | -0.86  | 0.2995 |
| PCHAS_144220 | 0.7062 | 0.2726 | 0.9905 | -0.05  | 0.1502 | 0.2684 | 0.03   | -0.336 | -0.039 | -1.521 | -0.176 | -0.391 |
| PCHAS_091660 | 0.264  | -0.241 | -0.01  | 0.0152 | 0.1936 | 0.176  | 0.412  | 0.9076 | 0.3197 | 0.6668 | 0.0456 | 0.1978 |
| PCHAS_134840 | 0.2993 | -0.184 | 0.3499 | -0.054 | 0.0859 | -0.34  | 0.4891 | -0.13  | -0.231 | -0.485 | 0.2899 | -0.429 |
| PCHAS_124440 | 1.0433 | 0.0854 | 0.455  | 0.3015 | 0.0215 | 0.0531 | 0.1151 | -0.156 | 0.1055 | -0.31  | -0.045 | -0.291 |
| PCHAS_141020 | -0.517 | 0.2715 | 0.353  | 0.4723 | 0.1413 | -0.473 | -0.479 | -0.363 | -0.112 | -1.096 | -0.175 | -1.012 |
| PCHAS_052230 | -0.432 | 0.5601 | 0.1422 | 0.2861 | 0.2529 | 0.3474 | -0.376 | -0.088 | 0.3547 | 0.0581 | -1.253 | 0.1384 |
| PCHAS_141780 | -0.297 | -0.009 | 0.3055 | -0.027 | 0.0935 | -0.006 | 0.0496 | 0.1943 | 0.0267 | -0.164 | 0.1567 | -0.27  |
| PCHAS_061040 | 0.5817 | 0.0396 | 0.267  | -0.024 | 0.1076 | -0.306 | 0.81   | 0.0001 | -0.143 | -0.286 | 0.0023 | -0.211 |
| PCHAS_101950 | 0.3648 | -0.722 | -0.528 | -0.454 | -0.395 | -0.386 | -0.135 | -0.421 | -0.419 | 0.0808 | 1.5645 | 0.081  |
| PCHAS_142030 | -0.687 | 1.1256 | 0.0498 | 0.1537 | -0.146 | -0.17  | 0.2911 | -0.059 | -0.546 | -0.625 | -0.741 | -0.72  |
| PCHAS_103150 | 0.7161 | -0.146 | 0.9686 | 0.5328 | 0.2133 | 0.0772 | -0.581 | -0.007 | -0.163 | -0.585 | -0.233 | -0.088 |
| PCHAS_136350 | -0.592 | -0.136 | 0.5699 | 0.2988 | 0.1831 | 0.2029 | 1.2955 | -0.276 | 0.2207 | -0.31  | -0.445 | -0.165 |
| PCHAS_070440 | 0.4556 | 0.4228 | 0.1597 | 0.4058 | 0.1379 | 0.0675 | -0.076 | -0.363 | -0.195 | -0.907 | -0.886 | -0.111 |
| PCHAS_136440 | 0.0813 | -1.28  | -1.409 | -0.379 | -0.131 | 0.3792 | 0.5664 | 0.2617 | -0.229 | 0.3797 | 1.8214 | 0.4014 |
| PCHAS_142680 | 0.4264 | 0.5524 | -0.285 | 0.2902 | 0.083  | 0.045  | -0.159 | 0.0265 | -0.051 | -0.191 | -1.201 | 0.1603 |
| PCHAS_111610 | -0.747 | -0.226 | -0.206 | -0.062 | -0.24  | -0.132 | -0.22  | 0.3698 | -0.25  | -0.137 | -0.082 | -0.335 |
| PCHAS_062300 | 0.7252 | 0.2395 | -0.062 | 0.7617 | 0.0267 | 0.5757 | 0.4891 | 0.6262 | 0.6768 | 0.3768 | -1.664 | 0.5385 |
| PCHAS_090780 | -0.287 | -0.88  | -0.072 | -1.202 | -0.117 | -0.071 | 0.8727 | 0.7764 | 0.1465 | 0.4719 | 1.173  | -0.059 |
| PCHAS_111970 | 0.4793 | 0.6685 | 0.4875 | 0.1662 | -0.036 | -0.621 | -0.827 | -1.285 | -0.699 | -1.3   | -0.191 | -0.769 |
| PCHAS_011230 | -0.797 | -0.114 | 0.0188 | -0.112 | 0.1425 | 0.1175 | 0.0687 | 0.6086 | 0.1433 | 0.0668 | 0.1554 | -0.119 |
| PCHAS_141570 | -0.121 | 0.0102 | 0.0757 | 0.0928 | 0.1471 | 0.0492 | 0.5421 | 0.1293 | -0.018 | -0.486 | -0.065 | -0.312 |



|              |        |        |        |        |        |        |        |        |        |        |        |        |
|--------------|--------|--------|--------|--------|--------|--------|--------|--------|--------|--------|--------|--------|
| PCHAS_020290 | 0.0547 | 0.2761 | 0.5066 | 0.1653 | 0.2451 | 0.3705 | 0.8485 | 0.0141 | 0.1718 | -0.458 | 0.3079 | 0.1617 |
| PCHAS_102520 | -0.319 | 0.0513 | 0.2197 | 0.117  | 0.056  | 0.1357 | 0.2954 | 0.1356 | -0.069 | 0.1192 | 0.3076 | -0.143 |
| PCHAS_113990 | 1.0064 | 0.3256 | 0.0659 | 0.0967 | 0.1638 | -0.118 | 0.9529 | 0.4432 | -0.07  | -0.673 | 0.5233 | -0.093 |
| PCHAS_011310 | -0.108 | 0.1537 | -0.235 | -0.185 | -0.45  | -0.227 | -0.127 | -0.479 | -0.372 | 0.0084 | 0.6334 | -0.221 |
| PCHAS_091380 | -0.436 | 0.4456 | 0.309  | 0.011  | -0.048 | -0.494 | -0.321 | -0.798 | -0.482 | -0.669 | 0.151  | -0.573 |
| PCHAS_122000 | -0.304 | 0.0474 | 0.2294 | 0.3175 | 0.1904 | 0.1417 | -0.064 | -0.317 | 0.2001 | -0.887 | -1.334 | -0.643 |
| PCHAS_112290 | -0.881 | -0.413 | 0.2603 | -0.15  | 0.0313 | 0.1848 | 1.6896 | 0.9169 | 0.1217 | 0.7164 | 1.0927 | 0.1092 |
| PCHAS_123580 | -0.258 | -1.171 | -0.398 | -0.539 | 0.0565 | 0.2541 | 1.37   | 0.9821 | 0.1586 | 0.7441 | 0.9073 | 0.3485 |
| PCHAS_102600 | 0.4617 | 0.1438 | -0.117 | 0.0049 | -0.233 | -0.557 | -0.171 | -0.485 | -0.701 | -0.788 | -0.01  | -0.572 |
| PCHAS_062080 | 0.3676 | 0.2962 | 0.3116 | -0.109 | 0.22   | -0.406 | 0.1871 | 0.1279 | 0.0067 | -0.251 | 0.0741 | -0.312 |
| PCHAS_121540 | -0.527 | 0.0029 | 0.3866 | -0.153 | -0.134 | -0.405 | 0.4489 | 0.19   | -0.144 | -0.608 | 0.1426 | -0.629 |
| PCHAS_061500 | -0.441 | 0.0328 | -0.24  | -0.777 | 0.0696 | 0.1328 | -0.013 | 1.2999 | 0.226  | 0.8207 | 0.8183 | 0.3521 |
| PCHAS_114550 | -0.345 | -0.339 | -1.222 | -0.115 | 0.2037 | 0.4858 | 0.4077 | 0.0619 | 0.1306 | -0.294 | -0.238 | -0.215 |
| PCHAS_061860 | 0.0133 | 0.0462 | 0.1159 | -0.085 | -0.026 | 0.2205 | 0.1434 | 0.0611 | -0.238 | 0.1054 | -0.04  | 0.298  |
| PCHAS_081890 | 1.0267 | 0.0823 | 0.117  | -0.37  | -0.031 | -0.13  | 0.4725 | 0.1067 | -0.307 | -0.35  | 0.6349 | -0.312 |
| PCHAS_020550 | 0.0948 | -0.36  | -0.343 | -0.207 | -0.182 | 0.1619 | -0.107 | 0.4276 | 0.0501 | 0.9261 | 1.2418 | 0.7631 |
| PCHAS_051400 | -0.588 | -1.618 | -1.627 | -1.347 | -0.29  | 0.3198 | -0.754 | 0.4106 | 0.2034 | 1.1254 | 0.3806 | 0.8561 |
| PCHAS_124550 | 0.3514 | 0.5146 | 0.2069 | 0.4477 | 0.3124 | -0.556 | 0.2714 | -0.702 | -0.51  | -1.6   | -1.824 | -0.979 |
| PCHAS_040450 | -0.293 | -0.392 | -0.25  | 0.0415 | 0.3299 | 0.2828 | -0.101 | 0.0924 | 0.2416 | 0.1518 | -0.549 | 0.0933 |
| PCHAS_062070 | -0.542 | -0.57  | -0.073 | -0.349 | -0.078 | 0.1048 | 0.3491 | 0.0932 | 0.0016 | 0.5102 | 1.2683 | 0.2108 |
| PCHAS_020680 | -0.155 | -0.931 | -1.495 | 0.3802 | 0.0502 | 0.1494 | 0.0973 | 0.026  | 0.415  | 0.0832 | -0.317 | 0.2451 |
| PCHAS_141060 | -0.874 | -0.255 | 0.1807 | 0.1119 | 0.3087 | 0.3484 | 0.8225 | 0.4101 | -0.06  | -0.628 | -0.357 | -0.501 |
| PCHAS_135560 | 0.3272 | 0.378  | 0.399  | 0.3492 | 0.1939 | -0.097 | -0.241 | -0.268 | -0.053 | -1.176 | -1.474 | -0.637 |
| PCHAS_052110 | 0.0641 | -0.218 | -0.242 | -0.598 | -0.341 | 0.1898 | -0.141 | 0.144  | -0.374 | 0.2439 | 0.3701 | 0.1428 |
| PCHAS_144550 | -1.6   | -2.553 | -2.125 | -3.22  | -0.419 | 1.0057 | -0.497 | 0.1379 | 0.7455 | 1.2278 | 0.1883 | 1.2179 |
| PCHAS_040210 | -0.109 | -0.235 | 0.5797 | 0.544  | 0.2121 | 0.5226 | 0.5549 | -0.139 | 0.4367 | -0.877 | -0.687 | -0.585 |
| PCHAS_070820 | 0.0876 | 0.5201 | 0.7686 | 0.6221 | 0.2936 | 0.4318 | 0.4316 | -0.149 | 0.262  | -0.829 | -0.916 | -0.232 |
| PCHAS_113850 | 1.1275 | -0.227 | 0.9725 | 0.0846 | 0.1775 | -0.708 | 0.4513 | 0.2286 | -0.232 | -1.412 | 0.3366 | -0.135 |
| PCHAS_011050 | 0.3229 | -0.49  | -0.673 | -0.759 | -0.054 | -0.303 | -0.33  | 0.2159 | 0.2673 | 1.2952 | 0.9719 | 1.4647 |
| PCHAS_110450 | 0.3377 | 0.2266 | 0.2681 | -0.023 | -0.012 | -0.42  | 0.5165 | 0.0544 | -0.358 | -0.16  | 0.115  | 0.0132 |
| PCHAS_142850 | 0.3014 | 0.5746 | 0.6105 | 0.1973 | 0.0796 | -0.353 | -0.243 | -0.773 | -0.45  | -1.329 | -1.18  | -0.691 |
| PCHAS_121180 | 0.0252 | 0.3024 | 0.1928 | 0.0868 | -0.155 | -0.245 | -0.793 | -0.355 | -0.406 | -0.699 | -0.978 | -0.713 |
| PCHAS_030760 | 0.4818 | 0.1778 | 0.2426 | 0.0989 | -0.046 | -0.056 | 0.1091 | 0.1361 | -0.083 | 0.0602 | -0.193 | -0.043 |
| PCHAS_124570 | 0.5568 | 0.4243 | 0.325  | -0.118 | -0.108 | 0.209  | -0.419 | -0.332 | 0.2486 | 0.8119 | 0.7768 | 0.4924 |
| PCHAS_111490 | -0.771 | -2.037 | -2.513 | -2.536 | -0.662 | 0.3041 | -0.844 | -0.239 | -9E-04 | 1.9606 | 1.7319 | 1.6866 |
| PCHAS_103160 | 0.8692 | -0.275 | 0.1398 | -0.248 | 0.1249 | -0.076 | -0.077 | 0.0228 | 0.3243 | 0.1425 | 0.0784 | 0.3847 |
| PCHAS_146200 | -0.163 | 0.4203 | 0.2839 | 0.1911 | 0.09   | 0.0802 | -0.143 | 0.0299 | -0.097 | 0.3219 | -0.713 | -0.203 |
| PCHAS_031550 | 1.0498 | 0.2917 | -0.535 | 0.1156 | -0.023 | 0.3189 | -0.214 | -0.56  | 0.1452 | -0.009 | 0.2118 | 0.2445 |
| PCHAS_122750 | -0.351 | 0.005  | 0.1139 | -0.147 | -0.013 | -0.408 | 0.498  | -0.085 | -0.212 | 0.4214 | 0.7025 | 0.2881 |
| PCHAS_091060 | -9E-04 | 0.2034 | 0.189  | 0.5139 | 0.0654 | 0.0503 | -0.573 | -0.347 | -0.062 | -0.801 | -1.356 | -0.392 |
| PCHAS_141150 | 0.4483 | 0.6687 | -0.245 | 0.6071 | -0.187 | 0.5529 | 0.1021 | 0.2315 | 0.4739 | 0.0259 | -0.856 | -0.154 |
| PCHAS_131560 | -0.046 | 0.107  | 0.2058 | -0.345 | -0.152 | -0.07  | 0.3009 | 0.2111 | -0.261 | 0.3964 | 0.511  | 0.2435 |
| PCHAS_112900 | 0.1275 | 0.421  | 0.7287 | 0.1014 | 0.5357 | -0.533 | 0.3503 | -0.134 | -0.381 | -1.318 | -1.718 | -0.444 |
| PCHAS_141640 | -1.247 | -0.294 | 0.1458 | 0.0782 | 0.2625 | -0.174 | -0.249 | 0.0082 | 0.1441 | -0.215 | -0.749 | -0.275 |
| PCHAS_010670 | -0.336 | 0.3797 | -0.51  | -0.025 | 0.0201 | 0.0107 | 0.1674 | -0.017 | -0.094 | -0.183 | -0.232 | 0.0964 |
| PCHAS_071950 | 0.7785 | -0.27  | -1.533 | 0.6448 | -1.618 | 0.5566 | 0.9669 | -0.1   | 0.506  | 0.5517 | -0.091 | -0.001 |
| PCHAS_136030 | 0.1365 | -0.176 | -0.561 | -0.814 | -0.523 | -0.407 | -1.184 | -0.989 | -0.467 | 0.7334 | 1.1659 | 1.0642 |
| PCHAS_092110 | -0.667 | -0.616 | 0.0244 | -0.286 | -0.042 | 0.0086 | 0.7687 | 0.1001 | -0.388 | -0.132 | 1.001  | -0.051 |
| PCHAS_133590 | 0.0979 | 0.2864 | 0.2585 | 0.2082 | 0.0955 | -0.028 | 0.2221 | 0.0732 | 0.2174 | -0.609 | -0.533 | -0.116 |
| PCHAS_091570 | 0.197  | -0.563 | 0.0563 | 0.047  | -0.032 | -0.693 | 0.395  | 0.0185 | -0.485 | -0.389 | 0.0663 | -0.445 |

|              |        |        |        |        |        |        |        |        |        |        |        |        |
|--------------|--------|--------|--------|--------|--------|--------|--------|--------|--------|--------|--------|--------|
| PCHAS_091870 | -0.806 | -0.098 | 0.3296 | 0.0103 | -0.215 | -0.313 | -0.189 | -0.101 | -0.506 | -0.357 | 0.0993 | -0.254 |
| PCHAS_131640 | 0.231  | 0.0741 | -0.129 | -0.283 | 0.1058 | 0.0845 | -0.008 | 0.1527 | 0.0331 | 0.7436 | 0.3945 | 0.4446 |
| PCHAS_140310 | 0.655  | 0.6166 | 0.4743 | 0.3232 | 0.1157 | 0.0857 | -0.361 | -0.542 | -0.128 | -0.796 | -0.591 | -0.825 |
| PCHAS_136880 | 0.0809 | 0.1515 | 0.1724 | 0.2635 | 0.0842 | 0.053  | 0.0691 | 0.2712 | 0.0877 | -0.439 | 0.0282 | -0.276 |
| PCHAS_080620 | -0.518 | -0.991 | -1.061 | -0.611 | -0.181 | 0.6043 | 0.2898 | 0.6499 | 0.3378 | 0.8166 | 0.3905 | 0.7986 |
| PCHAS_092470 | -0.036 | 0.1289 | 0.0896 | 0.2295 | 0.2015 | -0.094 | -0.257 | 0.0159 | -0.05  | -0.312 | -0.112 | -0.079 |
| PCHAS_071880 | -0.228 | -0.368 | 0.237  | 0.0661 | 0.0281 | 0.2804 | -0.115 | 0.5741 | 0.2396 | 0.7285 | 0.6536 | 0.5599 |
| PCHAS_071640 | -0.956 | -0.312 | -0.346 | 0.2697 | 0.0611 | 0.0557 | -0.551 | 0.16   | -0.015 | 0.3304 | -0.553 | 0.2164 |
| PCHAS_090450 | -0.344 | -0.385 | -0.177 | -0.109 | 0.1983 | -0.233 | -1.244 | 0.5269 | -0.53  | -0.011 | 0.2102 | -0.024 |
| PCHAS_031560 | -0.278 | -0.801 | -0.622 | -0.424 | -0.161 | -0.181 | 1.2237 | 0.0198 | -0.011 | 2.3454 | 2.4157 | 1.6634 |
| PCHAS_031660 | -0.047 | 0.099  | 0.3547 | 0.2687 | -0.012 | -0.264 | 0.0428 | 0.4303 | -0.331 | -0.155 | 0.26   | -0.225 |
| PCHAS_051090 | -0.114 | -0.326 | -0.258 | -0.054 | 0.0573 | 0.3512 | -0.111 | 0.2343 | 0.3833 | 0.3108 | 0.3268 | 0.473  |
| PCHAS_040700 | 0.3998 | 0.1045 | 0.2174 | 0.1743 | -0.579 | -0.244 | 0.2693 | -0.225 | -0.327 | -0.773 | -1.895 | -0.543 |
| PCHAS_110070 | 0.3051 | 0.2435 | 0.4069 | -0.373 | -0.148 | -0.664 | -0.61  | -0.266 | -0.501 | 0.6064 | 1.5    | 0.6219 |
| PCHAS_072640 | 0.0628 | 0.3502 | 0.3431 | 0.3839 | 0.1348 | -0.094 | -0.006 | -0.407 | -0.148 | -0.45  | -1.328 | -0.52  |
| PCHAS_070520 | 0.2639 | 0.3922 | 0.1511 | 0.0639 | -0.29  | -0.088 | -0.53  | 0.0052 | 0.1072 | 0.7733 | 1.7248 | 0.6661 |
| PCHAS_122760 | -0.204 | -0.569 | 0.0807 | -1.021 | -0.173 | -0.779 | 1.2717 | -0.499 | -0.438 | 1.9813 | 1.5021 | 1.4283 |
| PCHAS_133970 | -0.036 | 0.3021 | 0.3683 | 0.453  | 0.2545 | -0.359 | -0.443 | -0.338 | -0.17  | -0.097 | -0.175 | -0.343 |
| PCHAS_052280 | 0.2825 | 0.5211 | 0.5384 | 0.4623 | 0.2265 | -0.066 | -1.045 | -0.382 | -0.061 | -0.164 | -1.024 | -0.461 |
| PCHAS_144270 | -0.448 | 0.3028 | 0.0899 | 0.2662 | 0.1047 | 0.4284 | 0.0852 | 0.0087 | 0.1714 | -0.618 | -0.567 | -0.528 |
| PCHAS_061990 | 0.401  | 0.7385 | 0.6284 | 0.3165 | 0.0122 | -0.494 | -1.229 | -1.154 | -0.552 | -1.275 | -1.308 | -1.086 |
| PCHAS_112800 | 0.025  | 0.2821 | 0.2647 | 0.2    | 0.0584 | 0.3017 | -0.757 | -0.059 | 0.1698 | 0.1868 | -0.857 | -0.121 |
| PCHAS_145850 | -0.631 | 0.0277 | -0.87  | 0.2384 | 0.1334 | 0.3491 | 1.18   | 0.0536 | 0.8964 | -0.055 | 0.0316 | -0.352 |
| PCHAS_120460 | 0.0231 | 0.4859 | 0.8257 | 0.4946 | 0.1498 | -0.121 | -0.26  | -0.408 | -0.311 | -1.107 | -0.116 | -0.419 |
| PCHAS_020110 | 0.1644 | 0.6826 | 0.7202 | 0.4804 | 0.3212 | 0.4661 | -0.006 | -0.181 | 0.5158 | -0.113 | 0.0508 | 0.2314 |
| PCHAS_132980 | 0.345  | 0.2763 | 0.3868 | 0.3348 | 0.2309 | -0.133 | 0.3261 | -0.133 | 0.0012 | -0.603 | -1.076 | -0.483 |
| PCHAS_144000 | -0.285 | -0.129 | -0.031 | -0.229 | -0.085 | 0.1979 | 0.2309 | 0.1288 | 0.2147 | 0.1655 | -0.279 | 0.1652 |
| PCHAS_135480 | 1.0681 | 0.1573 | -0.042 | 0.6738 | 0.0409 | 1.2645 | 1.5449 | 1.3319 | 1.257  | 1.091  | 1.2423 | 1.0766 |
| PCHAS_030930 | -0.794 | -0.969 | -1.375 | -0.747 | 0.2245 | 0.8817 | 0.4231 | 0.6137 | 0.8963 | 0.8927 | -0.442 | 0.6824 |
| PCHAS_080730 | 0.0871 | -0.021 | -0.228 | -0.339 | -0.236 | 0.2698 | -0.328 | -0.428 | -0.109 | 0.3142 | 0.5108 | 0.4113 |
| PCHAS_144630 | -0.477 | 0.1585 | -0.08  | 0.428  | 0.1342 | 0.211  | 0.2579 | -0.476 | 0.2813 | -1.336 | -1.049 | -0.86  |
| PCHAS_111450 | -0.047 | 0.4361 | 0.3852 | 0.5268 | 0.0624 | 0.2581 | -0.576 | 0.288  | 0.0986 | 0.0308 | -0.514 | -0.274 |
| PCHAS_082910 | -0.687 | -0.655 | -0.479 | -0.776 | -0.089 | 0.2779 | 0.8953 | 0.8893 | 0.2988 | 0.8675 | 0.8282 | 0.5836 |
| PCHAS_142310 | 0.4782 | 0.5797 | 0.3418 | 0.3331 | 0.1931 | -0.31  | -0.166 | -0.835 | -0.486 | -1.552 | -0.581 | -0.742 |
| PCHAS_146560 | -0.187 | -0.026 | 0.6097 | 0.6312 | 0.3338 | 1.4457 | -0.247 | 0.4123 | 0.737  | -0.157 | -0.38  | 0.2899 |
| PCHAS_041440 | 0.1548 | 0.1868 | 0.3702 | -0.238 | -0.055 | -0.477 | -0.495 | -0.146 | -0.429 | 0.0741 | 0.3746 | -0.029 |
| PCHAS_136340 | -1.023 | -0.129 | -0.684 | -0.948 | -0.127 | -0.101 | -0.515 | 0.7163 | 0.3102 | 1.136  | 1.0171 | 0.7547 |
| PCHAS_050910 | -0.05  | 0.2575 | 0.5688 | 0.2748 | -0.048 | -0.437 | -0.406 | -0.538 | -0.568 | -0.914 | -0.618 | -0.808 |
| PCHAS_081690 | -0.201 | 0.6512 | 0.1686 | -0.263 | -0.096 | -0.448 | 0.3012 | -0.279 | -0.723 | -0.367 | -0.409 | -0.108 |
| PCHAS_031810 | -0.071 | -0.336 | -0.577 | -0.447 | -0.088 | 0.545  | 0.442  | 0.5817 | 0.4975 | 0.5917 | 0.2814 | 0.4022 |
| PCHAS_051280 | -0.991 | -0.253 | -0.044 | -0.12  | 0.1779 | 0.1231 | 0.1662 | 0.4759 | 0.0273 | 0.4833 | 0.4614 | 0.2655 |
| PCHAS_124120 | -0.268 | -0.205 | -0.999 | 0.4678 | -0.229 | 0.4454 | -0.257 | -0.633 | 0.3235 | -1.028 | -1.489 | -0.639 |
| PCHAS_130470 | 0.6783 | 0.2676 | 0.1683 | 0.2453 | -0.011 | 0.022  | -0.491 | -0.233 | 0.1944 | -1.166 | -0.92  | -0.707 |
| PCHAS_080230 | -0.311 | -0.242 | -0.075 | -0.295 | 0.017  | 0.245  | -0.404 | -0.356 | 0.2123 | 0.7951 | 0.9018 | 0.4623 |
| PCHAS_145810 | 0.0043 | 0.121  | 0.5291 | 0.4167 | 0.251  | -0.081 | -0.604 | -0.205 | -0.384 | 0.1833 | -2.18  | -0.679 |
| PCHAS_083160 | -0.015 | 0.3195 | 0.3816 | 0.1727 | 0.1408 | 0.4031 | 0.2038 | -0.292 | -0.026 | -1.029 | -0.96  | -1.215 |
| PCHAS_041910 | -0.989 | -0.959 | -0.591 | -0.753 | -0.16  | 0.5764 | 0.4279 | 0.9288 | 0.5346 | 0.9877 | 0.7016 | 0.6818 |
| PCHAS_146130 | 0.6772 | 0.6893 | 0.5963 | 0.2004 | -0.155 | -0.393 | -0.461 | -0.664 | -0.337 | -0.949 | 0.2407 | -0.515 |
| PCHAS_114190 | -1.236 | -0.922 | -0.953 | 0.0372 | 0.3468 | 0.1738 | 1.1842 | 0.7811 | 0.244  | -0.2   | 0.1668 | -0.26  |
| PCHAS_051750 | 0.215  | 0.2259 | 0.0457 | 0.1824 | 0.2066 | 0.0724 | 0.049  | -0.17  | 0.0317 | -0.903 | -1.011 | -0.55  |

|              |        |        |        |        |        |        |        |        |        |        |        |        |
|--------------|--------|--------|--------|--------|--------|--------|--------|--------|--------|--------|--------|--------|
| PCHAS_144900 | -0.719 | 0.1862 | -0.072 | 0.6142 | 0.1765 | 0.0084 | -0.17  | -0.613 | -0.01  | -1.81  | -1.547 | -1.351 |
| PCHAS_141270 | -0.976 | 0.3149 | 0.8665 | 0.2461 | 0.3343 | 0.1002 | 0.8077 | -0.099 | 0.0118 | -1.239 | -1.23  | -0.978 |
| PCHAS_080530 | 0.2826 | -0.036 | 0.2733 | 0.1837 | 0.2851 | -0.206 | 0.6514 | 0.0127 | 0.0722 | -0.363 | -0.256 | -0.479 |
| PCHAS_011080 | 0.3165 | -0.393 | 0.4392 | -0.208 | -0.135 | -0.199 | 0.2207 | 0.1084 | -0.317 | -0.056 | 0.7313 | -0.53  |
| PCHAS_111760 | -0.564 | 0.0139 | -0.522 | -0.448 | 0.0147 | -0.583 | 0.7946 | 0.5061 | -0.481 | 1.6258 | 1.464  | 1.5639 |
| PCHAS_130800 | 0.374  | -0.951 | -0.651 | -0.859 | -0.166 | 0.1632 | -0.312 | 0.2374 | -0.355 | 1.4713 | 1.3824 | 1.2257 |
| PCHAS_092440 | -0.582 | 0.069  | -0.071 | -0.194 | -0.098 | 0.3866 | 0.4556 | 0.4725 | 0.4123 | -0.708 | -0.079 | -0.608 |
| PCHAS_071310 | 0.4574 | 0.006  | 0.3051 | -0.152 | -0.029 | -0.216 | 0.3263 | 0.1694 | -0.212 | 0.1093 | -0.02  | 0.0193 |
| PCHAS_071050 | 0.532  | 0.2956 | 0.498  | 0.0228 | 0.2404 | -0.402 | 0.4395 | -0.21  | -0.293 | -0.937 | -1.436 | -1.053 |
| PCHAS_103520 | -0.459 | 0.1164 | 0.399  | 0.0569 | 0.0937 | -0.303 | -0.652 | -0.147 | -0.471 | -0.392 | -0.379 | -0.536 |
| PCHAS_062340 | -0.515 | 0.8927 | -0.844 | 0.5552 | -0.666 | 0.5078 | 0.4251 | -0.343 | 0.3458 | -0.765 | -0.143 | 0.2005 |
| PCHAS_050340 | 0.307  | 0.2385 | -0.002 | 0.0637 | 0.1608 | 0.5402 | -0.373 | -0.163 | 0.0892 | 0.4631 | 1.8753 | 0.434  |
| PCHAS_137000 | -0.188 | -0.093 | 0.1526 | 0.3514 | 0.2098 | 0.4482 | 0.8395 | 0.1452 | 0.5093 | -0.545 | -0.511 | -0.657 |
| PCHAS_103640 | 0.2649 | 0.5811 | 0.6804 | 0.131  | 0.171  | -0.156 | -0.507 | -0.391 | -0.063 | -0.66  | -1.28  | -0.739 |
| PCHAS_145640 | 0.0304 | 0.0255 | -0.155 | -0.023 | -0.122 | -0.202 | -0.228 | -0.312 | -0.184 | -0.457 | -0.809 | -0.143 |
| PCHAS_142830 | -0.395 | -0.848 | -0.291 | -0.458 | -0.101 | 0.0765 | -0.096 | 0.4232 | 0.0703 | 0.7363 | 0.3615 | 0.5812 |
| PCHAS_030700 | -0.128 | -0.761 | -1.194 | -0.512 | -0.194 | 0.5483 | -0.123 | 0.3229 | 0.4613 | 1.0809 | 1.0719 | 0.7169 |
| PCHAS_100500 | 0.3485 | 0.8675 | 0.691  | 0.1586 | 0.161  | -0.777 | -0.468 | -1.144 | -0.686 | -0.983 | -1.357 | -1.041 |
| PCHAS_021020 | -0.294 | 0.086  | -0.057 | -0.193 | -0.266 | -0.252 | -0.334 | -0.37  | -0.448 | -0.095 | -0.329 | -0.211 |
| PCHAS_112250 | -0.614 | -0.263 | 0.2259 | 0.1736 | 0.1787 | -0.141 | 0.4439 | 0.163  | -0.131 | -0.415 | 0.0053 | -0.589 |
| PCHAS_070530 | -0.374 | -0.597 | -0.246 | -0.667 | -0.314 | -0.114 | 0.2573 | 0.3094 | -0.121 | 0.6646 | 0.7822 | 0.6555 |
| PCHAS_102540 | 0.2191 | -0.351 | 0.386  | -0.09  | -0.024 | -0.178 | 0.0705 | -0.068 | -0.074 | -0.314 | 0.8466 | -0.064 |
| PCHAS_136760 | -0.044 | -0.033 | 0.5406 | -0.153 | -4E-04 | -0.141 | 1.2151 | 0.4426 | -0.264 | -0.135 | 0.4482 | 0.2947 |
| PCHAS_082250 | -0.047 | -1.199 | 0.2689 | 0.2472 | 0.3013 | -0.564 | -0.36  | 0.0966 | -0.086 | -0.518 | 0.4744 | -0.448 |
| PCHAS_031310 | -0.107 | -0.141 | 0.039  | -0.001 | -0.041 | 0.0799 | 0.081  | 0.0203 | 0.1056 | -0.338 | -0.342 | -0.414 |
| PCHAS_100990 | 0.5551 | 0.1985 | 0.3846 | 0.3552 | 0.1403 | -0.087 | 0.6783 | -0.529 | -0.193 | -1.259 | -0.046 | -0.741 |
| PCHAS_052490 | 0.5826 | -0.016 | 0.112  | 0.4133 | -0.041 | 0.1889 | 0.2564 | 0.3996 | 0.2979 | 0.4813 | 0.4419 | 0.2763 |
| PCHAS_130950 | 0.6088 | 0.4189 | 0.5796 | 0.5365 | 0.2374 | -0.244 | -0.556 | -0.492 | -0.377 | -0.944 | -1.19  | -1.05  |
| PCHAS_144960 | 0.1323 | -0.867 | -0.574 | -0.82  | -0.28  | 0.1448 | 0.6446 | 0.4697 | 0.1167 | 1.814  | 1.7272 | 0.9998 |
| PCHAS_110620 | -0.554 | -1.658 | -1.624 | -1.695 | -0.426 | 0.1386 | 0.2165 | 0.7556 | 0.1981 | 1.6438 | 1.2424 | 1.3929 |
| PCHAS_101670 | -0.136 | -0.229 | -0.096 | -0.223 | -0.477 | 0.1345 | 1.0832 | 0.2888 | -0.309 | -0.202 | 1.183  | -0.175 |
| PCHAS_070470 | -0.585 | -0.157 | 0.1289 | 0.3561 | 0.1587 | 0.459  | 0.2581 | 0.4007 | 0.3867 | 0.1654 | -0.195 | 0.5783 |
| PCHAS_124540 | 0.396  | 0.3677 | 0.327  | 0.2731 | 0.0907 | -0.215 | -0.137 | 0.0405 | -0.247 | -0.399 | -0.085 | -0.582 |
| PCHAS_021350 | -0.339 | 0.1508 | -0.187 | 0.4736 | 0.2656 | 0.0739 | 0.2113 | 0.4413 | 0.3384 | 0.4035 | 0.8784 | 0.9961 |
| PCHAS_100490 | 0.2895 | 0.7056 | 0.5033 | 0.1996 | 0.0735 | -0.173 | 0.0067 | -0.57  | -0.345 | -0.74  | 0.1007 | -0.521 |
| PCHAS_070830 | -0.4   | -0.564 | 0.344  | 0.1262 | 0.1336 | -0.093 | -0.297 | -0.212 | -0.229 | -0.303 | -0.987 | -0.071 |
| PCHAS_031250 | -0.178 | 0.2007 | 0.4516 | 0.1947 | -0.095 | -0.044 | 0.1354 | 0.0231 | -0.295 | -0.585 | -0.468 | -0.576 |
| PCHAS_143160 | -0.031 | 0.1139 | 0.2174 | 0.5637 | 0.2888 | -0.192 | -0.446 | -0.529 | -0.176 | -1.141 | -1.175 | -1.342 |
| PCHAS_121450 | -0.75  | -0.317 | 0.4147 | -0.295 | 0.1788 | -0.481 | -0.096 | 0.5914 | -0.332 | -0.465 | -0.083 | -0.605 |
| PCHAS_040680 | -0.467 | 0.0535 | 0.147  | 0.577  | 0.3724 | 0.6054 | -0.389 | 0.2951 | 0.5661 | -0.233 | -0.585 | -0.364 |
| PCHAS_103570 | 0.1128 | 0.0865 | 0.3672 | -0.147 | 0.1636 | -0.17  | 0.3811 | -0.38  | -0.247 | 0.0864 | -0.1   | 0.2004 |
| PCHAS_141240 | 0.037  | 0.0519 | 0.6602 | -0.14  | -0.039 | -0.888 | 0.1751 | 0.469  | -0.787 | -0.393 | -2.025 | -0.658 |
| PCHAS_136370 | 1.6957 | 0.3009 | 0.9977 | 0.0547 | 0.241  | -0.769 | 0.4177 | 0.3941 | -0.604 | -0.682 | 0.5412 | -0.562 |
| PCHAS_111010 | -0.115 | 0.4167 | 0.6197 | 0.1577 | 0.164  | 0.046  | -0.036 | -0.203 | -0.197 | -1.012 | -0.631 | -0.319 |
| PCHAS_121340 | 0.218  | 0.5097 | 0.5011 | 0.5243 | 0.408  | -0.153 | -0.216 | -0.905 | -0.193 | -1.865 | -1.688 | -1.44  |
| PCHAS_040540 | 0.5276 | -0.03  | 0.1462 | -0.109 | -0.082 | -0.056 | 0.5869 | 0.3512 | 0.0357 | 0.1191 | 0.0404 | 0.205  |
| PCHAS_080520 | 0.5314 | -0.036 | -0.084 | 0.0753 | -0.362 | -0.009 | 0.2087 | -0.149 | -0.3   | -0.313 | -0.462 | -0.53  |
| PCHAS_080810 | -0.028 | -0.029 | -0.353 | -0.147 | -0.053 | -0.067 | -0.091 | 0.0471 | -0.047 | 0.6443 | 0.754  | -0.641 |
| PCHAS_083330 | -2.479 | -2.627 | -2.515 | -1.568 | -0.741 | -0.189 | 1.5205 | 0.9812 | -0.217 | 0.2802 | 0.1232 | -0.072 |
| PCHAS_101150 | -1.295 | -1.055 | -1.02  | -0.352 | 0.2432 | 0.4315 | 0.7027 | 0.8256 | 0.4669 | 0.831  | 0.4179 | 0.6442 |

|              |        |        |        |        |        |        |        |        |        |        |        |        |
|--------------|--------|--------|--------|--------|--------|--------|--------|--------|--------|--------|--------|--------|
| PCHAS_146370 | -0.326 | -0.541 | -0.408 | -0.55  | 0.0434 | -0.136 | 0.1443 | 0.2931 | -0.088 | 0.3574 | 0.4782 | 0.322  |
| PCHAS_080740 | 0.5905 | 0.2835 | 0.4281 | 0.2117 | -0.446 | -0.279 | 0.0055 | -0.748 | -0.43  | -1.299 | -1.207 | -0.83  |
| PCHAS_000960 | -0.375 | 0.8565 | 0.1315 | -0.107 | -0.244 | 1.2041 | -0.001 | 0.0175 | 0.2992 | 1.4881 | 2.7754 | 1.7294 |
| PCHAS_071590 | 0.3829 | -0.788 | 0.3619 | 0.1556 | -0.059 | -0.04  | 0.563  | 0.041  | 0.3074 | -0.088 | 0.1383 | 0.5817 |
| PCHAS_110460 | -0.176 | 0.2943 | 0.6753 | 0.3274 | 0.1997 | 0.1095 | -0.101 | 0.2015 | 0.0434 | -0.265 | -0.09  | -0.722 |
| PCHAS_060850 | -0.53  | -0.427 | -0.374 | 0.0289 | -0.09  | 0.1422 | -0.03  | 0.3153 | 0.278  | 0.2742 | 1.6293 | 0.3931 |
| PCHAS_081570 | -1.077 | -1.668 | -1.648 | -2.036 | -0.864 | -0.163 | -1.459 | -0.589 | -0.124 | 1.6542 | 1.8402 | 1.5983 |
| PCHAS_000860 | -0.345 | -0.533 | -0.327 | -0.413 | -0.04  | 0.8093 | 0.2126 | 0.8587 | 0.6169 | 1.87   | 0.9658 | 1.5492 |
| PCHAS_041070 | -0.438 | -0.104 | -0.047 | -0.035 | -0.01  | 0.1799 | 0.0651 | 0.2885 | 0.0607 | 0.3878 | 0.533  | 0.474  |
| PCHAS_010990 | -0.238 | -0.186 | -0.365 | -0.166 | -0.347 | -0.06  | -0.353 | -0.403 | -0.099 | 0.7848 | 1.0108 | 0.0326 |
| PCHAS_143720 | 1.1945 | 0.5429 | 1.0491 | 0.0889 | 0.0788 | 0.1969 | -0.329 | -0.192 | 0.0037 | -0.688 | -0.214 | -0.064 |
| PCHAS_072140 | 0.2851 | 0.1316 | 0.824  | -0.153 | -0.087 | -0.323 | -0.289 | -0.536 | -0.689 | -0.299 | 0.332  | 0.0327 |
| PCHAS_072770 | 0.8155 | -0.34  | -0.438 | -0.045 | -0.05  | 0.3566 | 0.5011 | 0.3574 | 0.2491 | 0.865  | 0.5954 | 0.6446 |
| PCHAS_124230 | -0.156 | 0.1986 | 0.7581 | 0.1908 | 0.4816 | -0.4   | 0.1811 | -0.136 | -0.43  | -0.884 | -0.493 | -0.348 |
| PCHAS_092960 | -0.198 | 0.063  | 0.162  | 0.2164 | -0.046 | 0.1061 | -0.035 | -0.096 | 0.061  | -0.695 | -0.686 | -0.636 |
| PCHAS_124090 | -0.03  | -0.68  | 0.11   | -0.154 | -0.051 | -0.404 | 0.3276 | 0.2783 | -0.531 | -0.321 | 0.8242 | 0.0553 |
| PCHAS_102490 | 0.6412 | 0.6004 | 0.5458 | 0.1459 | -0.071 | -0.488 | -0.639 | -0.434 | -0.304 | -0.891 | -0.555 | -0.579 |
| PCHAS_041240 | -0.702 | -0.502 | -0.318 | 0.0873 | 0.0323 | 0.433  | 0.1209 | 0.2101 | 0.4566 | 0.1444 | -0.103 | 0.4006 |
| PCHAS_145530 | 0.4069 | 0.0205 | -0.127 | -0.326 | -0.238 | -0.17  | 0.0785 | -0.111 | -0.231 | -0.238 | -0.424 | -0.143 |
| PCHAS_122460 | 0.0406 | 0.4415 | 0.3777 | 0.6123 | 0.3394 | -0.627 | -0.09  | 0.1022 | -0.511 | -0.894 | -2.902 | -0.446 |
| PCHAS_031180 | -0.136 | -0.127 | -0.2   | -0.068 | -0.149 | -0.422 | 0.238  | 0.2681 | -0.22  | 0.1389 | 0.3362 | 0.0299 |
| PCHAS_112510 | -0.178 | 0.112  | 0.0959 | 0.6296 | 0.1338 | -0.033 | 0.18   | -0.257 | -0.033 | -0.74  | -0.487 | -0.832 |
| PCHAS_061780 | -0.872 | -0.155 | -0.067 | 0.3581 | 0.1668 | -0.05  | 0.1974 | 0.1623 | -0.098 | -0.357 | -0.321 | -0.515 |
| PCHAS_101730 | 0.1219 | 0.5428 | 0.3257 | -0.014 | -0.063 | 0.0407 | -0.004 | 0.1595 | 0.1094 | -0.293 | -0.147 | -0.106 |
| PCHAS_110320 | -0.348 | -0.11  | -0.297 | -0.049 | 0.1198 | -0.292 | 0.6955 | 0.2275 | -0.118 | -0.399 | -0.433 | -0.172 |
| PCHAS_040770 | 0.8866 | 0.0251 | -0.058 | -0.005 | 0.0122 | -0.127 | 0.2603 | 0.2824 | -0.179 | -0.266 | -0.089 | -0.342 |
| PCHAS_093050 | 0.0307 | 0.2397 | 0.1874 | 0.2757 | -0.046 | -0.498 | 0.0028 | 0.2331 | -0.194 | -0.456 | -0.555 | -0.7   |
| PCHAS_130440 | -0.08  | -0.044 | 0.488  | 0.2594 | 0.1825 | -0.28  | 0.1893 | -0.416 | -0.295 | -1.23  | -0.78  | -0.97  |
| PCHAS_131160 | -0.001 | -0.005 | -0.226 | 0.3045 | 0.1142 | 0.1801 | -0.244 | 0.3039 | 0.382  | 0.4826 | -0.055 | 0.3674 |
| PCHAS_122720 | -1.194 | -1.166 | -0.947 | -0.463 | 0.0989 | 0.628  | 0.907  | 0.6311 | 0.5368 | 0.0943 | 0.0957 | -0.182 |
| PCHAS_135430 | -0.242 | 0.1137 | 0.3072 | 0.2792 | -0.087 | -0.07  | -0.675 | -0.523 | -0.081 | -1.704 | -1.871 | -1.386 |
| PCHAS_123880 | -0.936 | -0.81  | -0.438 | -0.632 | -0.078 | 0.1416 | 0.4553 | 0.6116 | 0.256  | 0.9564 | 0.9806 | 0.8049 |
| PCHAS_062140 | 0.3129 | 0.0325 | 0.0881 | -0.186 | -0.001 | 0.8775 | -0.037 | -0.428 | -0.04  | 0.4383 | 0.7042 | 0.2809 |
| PCHAS_104060 | 0.0779 | -0.312 | 0.245  | -0.064 | 0.2991 | -0.205 | 0.5913 | 0.1639 | -0.286 | -0.346 | -0.488 | -0.578 |
| PCHAS_102980 | 0.4768 | -0.115 | -0.003 | -0.105 | 0.0414 | 0.5966 | -0.125 | 0.3319 | 0.54   | 1.238  | 0.5424 | 1.3704 |
| PCHAS_142430 | -0.325 | 0.6988 | 0.707  | 0.6759 | 0.0794 | -0.04  | -0.173 | -0.233 | -0.191 | -0.689 | -0.865 | -0.387 |
| PCHAS_110710 | 0.7268 | 0.1423 | 0.349  | 0.084  | 0.1958 | 0.0871 | -0.102 | -0.357 | 0.0045 | -0.376 | -0.55  | -0.33  |
| PCHAS_113650 | -0.757 | -0.115 | -0.101 | 0.1976 | 0.2671 | -0.022 | -0.044 | -0.181 | 0.0197 | -1.14  | -1.223 | -1.114 |
| PCHAS_145440 | 0.264  | 0.2572 | 0.2531 | 0.0103 | 0.1061 | -0.071 | 0.0417 | -0.144 | -0.009 | -0.209 | -0.278 | -0.131 |
| PCHAS_133980 | 0.3517 | 0.0787 | 0.2621 | -0.024 | 0.1383 | -0.036 | 0.099  | 0.1575 | -0.019 | -0.102 | 0.2293 | -0.007 |
| PCHAS_145220 | 0.3604 | 0.0704 | -0.98  | 0.4657 | 0.1745 | 0.1393 | -0.26  | -0.142 | 0.209  | -0.365 | -0.505 | 0.3885 |
| PCHAS_141220 | 0.0899 | 0.4615 | 0.5017 | 1.0141 | 0.042  | -0.006 | 0.0095 | -0.659 | 0.0286 | -1.129 | -1.086 | -1.043 |
| PCHAS_112200 | 2.279  | 1.6493 | 0.0853 | 1.0127 | -0.297 | 1.6859 | 1.9948 | 1.842  | 1.8171 | 1.0198 | 0.9435 | 0.703  |
| PCHAS_122200 | 0.2199 | -0.427 | -0.161 | -0.508 | 0.0356 | 0.553  | -0.654 | 0.0665 | 0.121  | 0.7679 | 0.9193 | 0.1757 |
| PCHAS_100790 | 0.2074 | 0.1919 | 0.1285 | 0.1282 | 0.1452 | -0.478 | -0.169 | -0.384 | -0.446 | -0.669 | 0.1646 | -0.49  |
| PCHAS_061430 | 0.3769 | 0.7556 | 0.3756 | 0.6529 | 0.1197 | 0.0711 | -0.165 | 0.0214 | 0.0753 | -1.439 | -2.149 | -1.028 |
| PCHAS_071990 | -0.342 | 0.1694 | 0.3276 | 0.2389 | 0.158  | 0.038  | -0.276 | -0.161 | -0.06  | -1.062 | -1.064 | -0.799 |
| PCHAS_080960 | -1.198 | -0.26  | -0.454 | -0.025 | -0.026 | 0.0931 | 0.9892 | 0.7677 | 0.136  | 0.295  | 0.4056 | 0.2833 |
| PCHAS_136590 | 0.1834 | 0.348  | 0.3055 | 0.3718 | 0.0193 | -0.271 | 0.0474 | -0.376 | -0.38  | -1.273 | -0.506 | -0.81  |
| PCHAS_071410 | -0.824 | -0.66  | -1.111 | -0.353 | -0.007 | 0.2226 | 0.3375 | 0.5317 | -0.194 | 0.7186 | -0.124 | -0.072 |

|              |        |        |        |        |        |        |        |        |        |        |        |        |
|--------------|--------|--------|--------|--------|--------|--------|--------|--------|--------|--------|--------|--------|
| PCHAS_134240 | -0.804 | -0.818 | 0.0272 | -0.312 | -0.138 | -0.268 | -0.107 | 0.3695 | -0.111 | 1.121  | -0.083 | 0.5595 |
| PCHAS_083150 | -0.048 | -0.329 | -0.245 | -0.404 | -0.106 | 0.3412 | -0.933 | -0.338 | 0.3596 | 1.899  | 1.1385 | 1.4142 |
| PCHAS_093470 | 1.2004 | 0.1153 | 0.1378 | -0.084 | -0.082 | -0.645 | 0.3634 | -0.426 | -0.416 | -0.617 | 0.1019 | -0.298 |
| PCHAS_080880 | 0.9531 | 0.1672 | 0.8599 | 0.237  | 0.2711 | -0.079 | 0.9257 | 0.1223 | -0.108 | -0.766 | 0.3447 | -0.61  |
| PCHAS_030670 | -0.364 | 0.0191 | 0.0396 | 0.2913 | 0.0552 | 0.2964 | -0.179 | -0.037 | 0.2645 | -0.066 | -0.268 | -0.082 |
| PCHAS_146720 | 0.561  | 0.5975 | 0.2952 | 1.116  | 0.2334 | -0.49  | -1.868 | -1.277 | -0.41  | -2.084 | -1.66  | -1.486 |
| PCHAS_040650 | 0.986  | -0.228 | -0.295 | -0.212 | 0.062  | 0.2068 | -0.024 | 0.4684 | 0.2241 | 1.2791 | 1.1136 | 1.0774 |
| PCHAS_080770 | 0.1061 | -0.01  | 0.5608 | -5E-04 | -0.069 | -0.134 | 0.5497 | -0.359 | -0.005 | -0.913 | -0.746 | -0.692 |
| PCHAS_081440 | 0.4419 | 0.5381 | 0.6825 | 0.4798 | 0.0107 | -0.168 | -0.706 | 0.0741 | -0.01  | -0.368 | -0.053 | -0.294 |
| PCHAS_113780 | -0.357 | -0.573 | -0.081 | -0.704 | -0.072 | -0.021 | 0.5854 | 0.2917 | -0.035 | 0.4099 | 0.4092 | 0.2327 |
| PCHAS_092770 | -0.562 | -0.105 | 0.5676 | -0.18  | 0.2958 | -0.281 | 0.4856 | 0.426  | -0.056 | -0.408 | -1.294 | -0.628 |
| PCHAS_031220 | -0.117 | 0.0452 | 0.3875 | 0.024  | 0.2701 | -0.298 | 0.783  | 0.216  | -0.242 | -0.697 | 0.3917 | -0.633 |
| PCHAS_090220 | -0.182 | 0.0742 | 0.2983 | 0.1966 | 0.1004 | -0.033 | -0.063 | -0.232 | -0.263 | -0.581 | 0.0529 | -0.583 |
| PCHAS_141230 | -0.02  | 0.1347 | 0.0449 | -0.095 | 0.0105 | -0.409 | 0.2212 | -0.345 | -0.268 | -0.668 | -0.433 | -0.723 |
| PCHAS_082440 | 0.0322 | 1.0952 | 0.5181 | 0.2194 | 0.1079 | -0.055 | -0.369 | -0.679 | -0.373 | -1.089 | -1.464 | -0.611 |
| PCHAS_061410 | -0.146 | -0.089 | 0.2878 | -0.134 | -0.079 | -0.06  | -0.09  | 0.0127 | -0.125 | -0.082 | 1.2855 | 0.2516 |
| PCHAS_082630 | 0.2513 | 0.4713 | 0.5466 | 0.1751 | -0.125 | 0.379  | 0.0294 | -0.25  | -0.065 | -0.597 | -0.192 | -0.117 |
| PCHAS_031270 | 0.524  | 0.2688 | 0.4049 | -0.011 | 0.1843 | -0.436 | 0.1711 | -0.01  | -0.285 | -0.742 | 0.2072 | -0.452 |
| PCHAS_031190 | -0.491 | 0.1312 | -0.628 | 0.2315 | 0.0959 | 0.4827 | 0.3549 | 0.3721 | -0.128 | 0.1821 | 0.0881 | 0.0068 |
| PCHAS_143140 | 0.5254 | 0.1162 | -0.118 | -0.303 | -0.528 | -0.279 | 0.4472 | 0.2569 | -0.329 | -0.189 | 0.6407 | -0.11  |
| PCHAS_071840 | 0.5386 | 0.2894 | 0.3997 | 0.1916 | 0.0551 | -0.484 | 0.0843 | -0.065 | -0.25  | -0.762 | 0.1485 | -0.484 |
| PCHAS_091190 | -0.256 | 0.2742 | 0.4313 | 0.3127 | 0.0158 | -0.18  | 0.1107 | 0.0141 | -0.157 | -0.388 | -0.684 | -0.22  |
| PCHAS_103290 | -0.236 | -1.028 | -1.421 | -1.213 | -0.403 | 0.054  | -0.259 | -0.387 | 0.3072 | 0.7908 | 0.7113 | 0.6342 |
| PCHAS_120680 | 0.1672 | 0.0694 | -0.404 | 0.335  | 0.0329 | 0.0104 | 0.1278 | -0.09  | 0.1784 | -0.385 | -0.245 | -0.354 |
| PCHAS_092010 | -0.396 | -0.442 | 0.1923 | -0.041 | -0.057 | 0.8448 | 0.399  | 0.4075 | 0.4123 | -0.345 | 0.0099 | -0.49  |
| PCHAS_110640 | 0      | -0.049 | 0.0142 | 0.0488 | 0.1518 | -0.131 | 0.5315 | -0.348 | -0.212 | -0.544 | -0.678 | -0.249 |
| PCHAS_071920 | -0.502 | 0.3077 | -0.021 | 0.2745 | -0.044 | -0.474 | -0.645 | -0.694 | -0.309 | -1.245 | -0.642 | -0.839 |
| PCHAS_041450 | 0.2099 | 0.4018 | 0.2509 | -0.02  | -0.17  | -0.205 | -0.026 | 0.0317 | -0.677 | -0.826 | 0.0373 | -0.409 |
| PCHAS_141940 | 0.8549 | 0.1068 | 0.0595 | -0.099 | -0.084 | -0.62  | -0.14  | -0.235 | -0.519 | 0.2458 | 0.3068 | 0.3764 |
| PCHAS_100470 | -0.303 | 0.1371 | 0.1025 | 0.0577 | -0.171 | -0.32  | -0.256 | -0.296 | -0.193 | -0.813 | -0.237 | -0.718 |
| PCHAS_134460 | -0.186 | 0.5483 | 0.6801 | 0.5241 | 0.262  | -0.204 | 0.0538 | -0.016 | -0.066 | -0.928 | -0.386 | -0.697 |
| PCHAS_120910 | -0.183 | 0.2451 | 0.2936 | 0.1012 | 0.2222 | -0.335 | -0.481 | -4E-04 | -0.257 | -0.467 | -0.088 | -0.217 |
| PCHAS_081780 | -1.053 | -0.427 | -0.431 | 0.3084 | 0.0342 | -0.413 | 0.2205 | -0.16  | 0.1463 | 0.2952 | 0.1872 | -0.311 |
| PCHAS_110140 | 0.0286 | -0.205 | -0.286 | 0.3908 | 0.0488 | -0.522 | 0.1655 | 0.0791 | -0.584 | -0.645 | -0.588 | 0.5088 |
| PCHAS_020670 | 0.2254 | 0.3897 | 0.241  | 0.337  | 0.2289 | 0.1273 | 0.5519 | 0.2824 | 0.0689 | -0.362 | 0.1783 | -0.251 |
| PCHAS_120570 | -0.427 | 0.4671 | -0.161 | 0.5469 | 0.256  | 0.018  | -0.65  | 0.2407 | 0.1256 | -0.593 | -0.187 | -0.41  |
| PCHAS_031060 | 0.2645 | -0.65  | -0.101 | 0.0464 | -0.01  | 0.2915 | 0.6833 | 1.1204 | 0.1014 | 0.6289 | 0.8216 | 0.3158 |
| PCHAS_030800 | -0.376 | 0.072  | 0.1978 | 0.3519 | 0.0342 | -0.032 | 0.4341 | 0.2043 | -0.053 | -0.423 | 0.2002 | -0.304 |
| PCHAS_132270 | -0.168 | 0.2386 | 0.393  | -0.034 | 0.1229 | 0.1829 | -0.27  | -0.107 | -0.046 | -0.382 | -0.689 | -0.165 |
| PCHAS_145400 | 0.3361 | 0.261  | 0.4611 | 0.4148 | 0.1179 | 0.0185 | -0.55  | -0.426 | -0.054 | -0.703 | -0.914 | -0.34  |
| PCHAS_052340 | 0.0845 | 0.6109 | 0.4735 | 0.1717 | 0.3018 | 0.0476 | -0.391 | -0.229 | -0.017 | -1.445 | -1.685 | -0.53  |
| PCHAS_092210 | -0.158 | 0.0358 | 0.0916 | 0.109  | 0.051  | -0.042 | 0.115  | -0.292 | -0.053 | -1.384 | -1.047 | -0.961 |
| PCHAS_080160 | -0.664 | -1.215 | -0.954 | -1.129 | -0.523 | 0.4011 | -0.543 | 0.0938 | 0.3033 | 1.9177 | 1.9019 | 1.6501 |
| PCHAS_143210 | 0.0859 | -0.06  | 0.1899 | 0.0808 | 0.1473 | -0.261 | 0.316  | 0.3336 | -0.389 | -0.684 | -0.129 | -0.536 |
| PCHAS_102690 | 0.2562 | 0.3201 | -0.685 | 0.3923 | -0.253 | 0.1794 | 0.5469 | 0.1802 | 0.5083 | 0.5753 | -0.114 | 0.5998 |
| PCHAS_123020 | 0.7232 | 0.2858 | 0.5787 | -0.401 | -0.042 | -0.354 | 0.7705 | -0.193 | -0.28  | -0.401 | 0.4311 | -0.321 |
| PCHAS_031370 | 0.4129 | 0.5123 | 0.3077 | 0.1921 | 0.0443 | -0.344 | 0.4276 | 0.3881 | -0.06  | -0.115 | 0.1476 | -0.002 |
| PCHAS_124600 | 0.524  | 0.3526 | 0.6754 | 0.3504 | 0.0707 | 0.1741 | 0.3432 | -0.049 | -0.155 | -0.605 | 0.0568 | -0.696 |
| PCHAS_132410 | 0.2705 | 0.1267 | 0.4061 | 0.115  | 0.1708 | -0.281 | -0.026 | 0.0206 | -0.323 | 0.4394 | -0.302 | 0.5152 |
| PCHAS_121650 | 0.5385 | 0.4602 | 0.4878 | 0.2191 | 0.173  | -0.102 | -0.333 | -0.21  | -0.355 | -0.96  | -1.965 | -0.706 |

|              |        |        |        |        |        |        |        |        |        |        |        |        |
|--------------|--------|--------|--------|--------|--------|--------|--------|--------|--------|--------|--------|--------|
| PCHAS_120890 | -0.135 | -0.392 | -0.07  | -0.131 | 0.0556 | 0.2829 | 0.0161 | 0.438  | 0.3083 | 0.6794 | 0.1451 | 0.7225 |
| PCHAS_102750 | -0.367 | 0.5408 | 0.9934 | -0.206 | -0.231 | -0.048 | 0.3242 | 0.2352 | -0.498 | 0.3523 | 1.0995 | -0.149 |
| PCHAS_090480 | -0.979 | -1.493 | -1.074 | -0.927 | -0.464 | 0.0146 | 1.4706 | 0.7238 | 0.0594 | 1.2195 | 1.1058 | 1.1361 |
| PCHAS_062440 | 0.2578 | 0.1443 | 0.4465 | -0.099 | 0.1864 | -0.129 | 0.684  | 0.5089 | -0.139 | -0.288 | 0.4262 | -0.425 |
| PCHAS_060120 | -0.148 | -0.024 | -0.394 | -0.12  | -0.18  | 0.6504 | 0.1067 | 0.5245 | 0.5412 | 0.6053 | -0.094 | 0.1125 |
| PCHAS_133410 | -0.88  | -0.868 | -1.031 | -0.686 | -0.309 | 0.1833 | -0.074 | 0.7743 | 0.108  | 1.2116 | 0.9311 | 0.9098 |
| PCHAS_135300 | -0.783 | -1.237 | -1.104 | -1.206 | -0.447 | -0.041 | 0.7099 | 0.6031 | -0.056 | 1.1941 | 1.0775 | 0.9757 |
| PCHAS_121070 | 0.0592 | 0.4291 | 0.5106 | -0.145 | -0.117 | -0.36  | 0.2549 | -0.471 | -0.272 | -0.512 | -0.481 | -0.189 |
| PCHAS_102770 | 1.1329 | 0.3945 | 0.245  | -0.283 | -0.06  | -0.548 | 0.415  | -0.354 | -0.538 | -0.578 | 0.1282 | -0.334 |
| PCHAS_093140 | 0.3749 | 0.166  | 0.2812 | 0.1743 | 0.3051 | -0.356 | 0.3551 | -0.285 | -0.558 | -0.252 | -0.312 | 0.2839 |
| PCHAS_011150 | 0.4674 | 0.4983 | 0.1821 | 0.2426 | -0.058 | -0.454 | 0.3178 | -0.713 | -0.566 | -0.997 | -0.344 | -0.248 |
| PCHAS_135690 | -1.522 | -0.273 | -0.149 | -0.842 | 0.3397 | 0.5673 | -0.202 | 0.0976 | 0.5719 | -1.113 | -1.034 | -0.144 |
| PCHAS_071520 | -0.641 | 0.0295 | -1.29  | -1.082 | -0.359 | 0.4866 | -0.038 | 0.2497 | 0.4555 | 1.8709 | 1.8297 | 1.7171 |
| PCHAS_142840 | 0.104  | -0.606 | -0.346 | -0.538 | -0.235 | 0.1206 | -0.286 | -0.452 | -0.004 | 1.7353 | 2.0973 | 1.3148 |
| PCHAS_072960 | -0.044 | 0.1624 | 0.2626 | 0.0779 | 0.3    | -0.064 | 0.7187 | 0.2066 | -0.034 | -0.344 | 0.6023 | -0.489 |
| PCHAS_072270 | -0.332 | -0.097 | -0.034 | -0.158 | 0.2829 | 0.0601 | -0.571 | -0.059 | -0.122 | 0.9072 | 0.3854 | 0.4793 |
| PCHAS_060860 | -0.015 | 0.3335 | 0.4303 | 0.219  | 0.3107 | -0.092 | 0.2224 | 0.1527 | -0.12  | -0.563 | -0.067 | -0.444 |
| PCHAS_111980 | 1.4007 | 0.4987 | 0.5886 | 0.1772 | 0.2496 | -0.593 | 0.0688 | -0.063 | -0.531 | -1.609 | -0.717 | -0.752 |
| PCHAS_051670 | -0.253 | -0.039 | 0.3768 | -0.019 | 0.1422 | -0.36  | -0.02  | -0.487 | -0.438 | -1.369 | -0.164 | -0.928 |
| PCHAS_140660 | -1.269 | -1.649 | -1.274 | -1.164 | -0.154 | 0.2152 | 0.5487 | 0.6972 | 0.2211 | 0.9245 | 0.4774 | 0.9996 |
| PCHAS_146170 | 0.2322 | 0.1005 | -0.237 | 0.5089 | 0.1136 | 0.2864 | 0.2237 | -0.286 | 0.0874 | -0.119 | 0.2236 | 0.1186 |
| PCHAS_113790 | -0.172 | -0.04  | 0.1249 | -0.115 | -0.546 | -0.351 | -0.496 | 0.0508 | -0.27  | 0.0661 | -1.122 | -0.205 |
| PCHAS_120210 | 0.7557 | -0.315 | -0.701 | -0.155 | -0.811 | 0.3383 | 0.0508 | 0.2361 | 0.166  | 1.569  | 1.0516 | 1.0577 |
| PCHAS_082590 | 0.4968 | 0.4    | 0.4877 | 0.1322 | 0.1968 | -0.083 | 0.0549 | 0.1121 | -0.012 | -0.393 | -0.403 | -0.369 |
| PCHAS_101990 | -0.09  | -0.192 | 0.0336 | 0.1168 | 0.2633 | 0.2288 | -0.111 | 0.2385 | 0.2203 | 0.2502 | 0.1501 | 0.6613 |
| PCHAS_134660 | 1.9932 | -0.147 | 0.2737 | -0.082 | 0.1469 | -0.161 | -0.071 | 0.1891 | -0.507 | -0.063 | -0.159 | -0.275 |
| PCHAS_143990 | -0.623 | -0.811 | -0.587 | -0.776 | -0.274 | -0.002 | -0.312 | 0.2985 | 0.0414 | 1.8531 | 1.5306 | 1.2347 |
| PCHAS_144640 | 0.3794 | -0.269 | 0.5917 | 0.1604 | 0.3982 | 0.2232 | 0.7289 | -0.069 | 0.1631 | 0.1986 | 0.108  | -0.024 |
| PCHAS_120150 | -0.187 | 0.0192 | 0.1933 | 0.1007 | 0.0799 | -0.031 | -0.02  | 0.1126 | 0.0469 | -0.35  | -0.459 | -0.407 |
| PCHAS_131320 | 1.1376 | 0.4735 | 0.5801 | -0.426 | -0.224 | -0.127 | 0.8196 | -0.028 | -0.209 | 0.3412 | 1.5879 | 0.3404 |
| PCHAS_122400 | -0.795 | -1.577 | -0.664 | -0.817 | -0.311 | -0.545 | -0.08  | 0.3576 | -0.496 | 1.6483 | 1.7199 | 0.6404 |
| PCHAS_103910 | -0.473 | 0.1379 | -0.153 | -0.403 | -0.204 | -0.131 | -0.265 | -0.324 | -0.23  | -0.375 | 0.8357 | -0.179 |
| PCHAS_110060 | 2.2326 | 0.9444 | 1.0171 | 0.2895 | -0.296 | 0.045  | 0.168  | 0.3364 | 0.6929 | 0.974  | 0.6637 | 0.4726 |
| PCHAS_030190 | 0.11   | 0.4597 | 0.6082 | 0.5652 | 0.1304 | 0.2468 | -0.149 | -0.483 | 0.0868 | -1.396 | -1.108 | -0.745 |
| PCHAS_140900 | -0.39  | 0.7487 | -0.115 | 0.3394 | 0.0272 | 0.3929 | 0.1873 | 0.0839 | 0.1234 | 0.5479 | -0.633 | 0.1762 |
| PCHAS_000120 | 0.6184 | 0.5177 | 0.3414 | 0.1918 | -0.225 | -0.133 | -0.505 | -0.479 | -0.349 | -0.379 | -0.464 | -0.163 |
| PCHAS_113950 | -0.561 | 0.0249 | 0.1831 | -0.02  | 0.0401 | -0.529 | -0.109 | -0.029 | -0.111 | 0.7255 | 0.0761 | 0.3666 |
| PCHAS_080100 | -0.282 | 0.1551 | 0.4482 | 0.2753 | 0.2118 | 0.0196 | -0.017 | 0.2874 | 0.1323 | -0.021 | -1.236 | -0.269 |
| PCHAS_103300 | 0.1718 | 0.5263 | 0.1251 | 0.5638 | 0.1858 | -0.585 | -0.196 | -0.21  | -0.395 | -0.447 | -2.769 | -0.435 |
| PCHAS_131870 | 0.0386 | -0.088 | -0.053 | -0.142 | 0.1426 | -0.099 | 0.3857 | 0.2603 | -0.061 | 0.1992 | 0.3332 | 0.3156 |
| PCHAS_093690 | -0.322 | -0.082 | 0.0144 | 0.1941 | 0.0431 | -0.11  | 0.4206 | 0.2167 | -0.195 | 0.304  | 0.0918 | -0.108 |
| PCHAS_040380 | -0.124 | -0.297 | 0.3248 | 0.2335 | 0.2395 | -0.351 | 0.4349 | -0.037 | -0.452 | -1.069 | -0.774 | -1.063 |
| PCHAS_070270 | 0.887  | -0.083 | 0.3701 | 0.108  | 0.126  | -0.251 | 0.4112 | 0.4744 | -0.148 | 0.0822 | -0.071 | 0.0104 |
| PCHAS_123180 | -1.209 | -0.744 | -0.394 | -0.28  | -0.073 | -0.392 | 0.0769 | 0.2595 | -0.408 | -0.564 | 0.5884 | -0.255 |
| PCHAS_093390 | -0.272 | 0.1038 | -0.099 | 0.1173 | -0.003 | -0.17  | 0.2868 | -0.398 | -0.143 | -0.786 | -1.038 | -0.656 |
| PCHAS_123770 | -0.875 | -0.763 | 0.1321 | -0.197 | 0.1929 | 0.1175 | 0.8079 | 0.6547 | 0.1733 | 0.3192 | 0.448  | 0.1243 |
| PCHAS_040500 | -0.24  | -0.691 | -0.708 | -0.641 | -0.063 | -0.134 | 0.3987 | 0.3919 | -0.06  | 0.3318 | 1.354  | 0.2572 |
| PCHAS_140270 | -0.131 | -0.749 | -0.514 | -0.731 | -0.698 | -0.555 | -0.277 | -0.056 | -0.768 | 0.1837 | 2.1669 | 0.6312 |
| PCHAS_130600 | -0.781 | -0.171 | -0.097 | -0.004 | 0.0657 | 0.5681 | 0.2748 | 0.4808 | 0.3751 | 0.1618 | 0.3707 | 0.1978 |
| PCHAS_131500 | 0.2672 | -0.112 | -0.011 | -0.137 | 0.0636 | 0.0425 | -0.038 | 0.0638 | 0.0319 | 0.4655 | 0.836  | 0.4174 |

|              |        |        |        |        |        |        |        |        |        |        |        |        |
|--------------|--------|--------|--------|--------|--------|--------|--------|--------|--------|--------|--------|--------|
| PCHAS_114440 | -0.575 | -0.744 | -0.302 | -0.416 | -0.224 | -0.156 | 0.6008 | 0.9116 | -0.274 | 0.6703 | 1.0703 | 0.3266 |
| PCHAS_146580 | 0.4662 | -0.014 | 0.2019 | 0.1322 | 0.2383 | 0.0749 | 0.5943 | -0.155 | 0.094  | -0.852 | -0.401 | -0.363 |
| PCHAS_132320 | 0.0693 | 0.3156 | 0.2202 | 0.7755 | 0.1571 | -0.277 | 0.7703 | -0.25  | -0.173 | -0.931 | -0.204 | -0.588 |
| PCHAS_135230 | 0.3176 | 0.0259 | 0.3043 | 0.2915 | 0.1796 | 0.1927 | 0.3985 | -0.06  | 0.1889 | -0.723 | -1.05  | -0.649 |
| PCHAS_060420 | 0.1598 | 0.2178 | 0.0995 | 0.3544 | 0.0536 | 0.6603 | 0.1577 | 0.2646 | 0.4372 | 0.1461 | -0.031 | 0.1003 |
| PCHAS_100610 | 0.4741 | 0.0236 | -2.034 | 0.5698 | 0.3171 | 0.7813 | 0.792  | -0.057 | 0.5354 | -0.352 | 0.0801 | -0.009 |
| PCHAS_102310 | -0.015 | -0.029 | -0.271 | 0.0052 | 0.0176 | -0.261 | 0.0123 | 0.3857 | -0.047 | -0.046 | 0.1221 | 0.0641 |
| PCHAS_020730 | -0.041 | 0.6503 | -0.073 | 0.5173 | 0.15   | 0.1003 | -0.714 | -0.27  | 0.0305 | -1.656 | -1.739 | -1.044 |
| PCHAS_021330 | -1.321 | -1.475 | -1.395 | -1.443 | -0.197 | 0.2388 | -0.117 | 0.3114 | 0.3627 | 0.765  | 0.7993 | 0.3378 |
| PCHAS_081290 | 0.0945 | -0.544 | -0.004 | -0.193 | 0.3403 | -0.274 | 0.2275 | 0.2735 | -0.475 | -0.699 | -0.473 | 0.2124 |
| PCHAS_050520 | -0.177 | -0.592 | -0.108 | -0.598 | -0.128 | -0.019 | 0.4489 | 0.2155 | -0.061 | 0.4167 | 0.4445 | 0.1545 |
| PCHAS_061620 | -0.067 | 0.2099 | 0.155  | 0.3624 | 0.178  | -0.038 | -0.01  | -0.003 | -0.077 | -0.628 | -0.403 | -0.529 |
| PCHAS_081920 | -1.472 | -1.169 | -0.675 | -0.369 | 0.253  | 0.5739 | 0.7646 | 0.6615 | 0.5126 | 0.2341 | -0.37  | 0.0463 |
| PCHAS_143980 | 0.5647 | 0.3523 | 0.9674 | 0.3232 | 0.1669 | 0.1769 | 0.3741 | -0.328 | 0.2452 | -1.471 | -0.557 | -0.463 |
| PCHAS_134680 | 0.1878 | 0.1495 | 0.0328 | 0.495  | 0.0788 | -0.168 | -0.516 | -0.626 | -0.345 | -1.174 | -1.226 | -0.716 |
| PCHAS_132630 | -1.085 | -0.472 | -0.184 | -0.206 | 0.2382 | -0.12  | 0.5618 | 0.5669 | -0.278 | -0.173 | -0.217 | -0.462 |
| PCHAS_031710 | -0.401 | -0.248 | -0.352 | -0.128 | -0.2   | -0.045 | -0.022 | -0.173 | -0.115 | 0.2751 | 2.5834 | -0.012 |
| PCHAS_121970 | 0.3422 | 0.5445 | 0.3057 | -0.075 | 0.0377 | 0.0416 | -0.835 | -0.751 | -0.143 | -1.117 | -0.866 | -0.524 |
| PCHAS_132570 | -0.936 | -0.65  | -0.915 | -0.481 | -0.184 | -0.22  | 0.6715 | 1.0043 | 0.0779 | 0.9849 | 0.64   | 0.8069 |
| PCHAS_146460 | -0.349 | -0.553 | -0.423 | -0.584 | -0.175 | -0.485 | 0.5544 | 0.7403 | -0.076 | 0.9489 | 0.8704 | 0.7984 |
| PCHAS_071000 | -0.989 | -1.508 | -0.953 | -1.096 | -0.509 | -0.802 | 1.2698 | 0.8757 | -0.499 | 1.0912 | 0.7024 | 0.8299 |
| PCHAS_140590 | -0.205 | 0.1977 | 0.6205 | 0.1827 | 0.1773 | -0.307 | -0.214 | -0.203 | -0.186 | -1.015 | -0.48  | -0.53  |
| PCHAS_072290 | -0.674 | -0.656 | -0.151 | 0.3104 | 0.0651 | 0.6775 | 0.3354 | 0.6463 | 0.3979 | 0.2989 | -0.01  | -0.125 |
| PCHAS_072190 | 0.998  | 0.5415 | 0.7266 | -0.056 | -0.08  | 0.0746 | -0.056 | -0.518 | -0.254 | -0.768 | -0.328 | -0.516 |
| PCHAS_083540 | -1.377 | -1.289 | -0.599 | -0.404 | 0.1143 | 0.2836 | 0.4038 | 0.6854 | 0.2574 | 0.2766 | 0.4911 | 0.0789 |
| PCHAS_102390 | 0.0144 | -0.479 | -1.022 | 0.1307 | 0.0105 | 0.5312 | -0.221 | -0.168 | 0.2166 | 0.3737 | 1.3397 | 0.2915 |
| PCHAS_073150 | -1.147 | -1.299 | -1.043 | -1.318 | -0.422 | 0.1597 | 0.4955 | 1.269  | 0.1372 | 1.2717 | 0.8284 | 0.8417 |
| PCHAS_145300 | -0.702 | -0.194 | 0.151  | 0.3189 | 0.2821 | 0.0665 | 0.2543 | 0.0306 | 0.1463 | -0.982 | -0.764 | -0.73  |
| PCHAS_071150 | 0.0244 | 0.0286 | 0.197  | 0.4066 | 0.1922 | 0.154  | -0.102 | -0.363 | 0.1302 | -1.007 | -1.098 | -0.863 |
| PCHAS_120320 | -0.207 | 0.1694 | -0.297 | 0.0016 | -0.094 | 0.2662 | -0.431 | -0.194 | 0.2039 | 0.048  | -0.363 | 0.0702 |
| PCHAS_131430 | 0.2691 | 0.4803 | 0.5229 | 0.5089 | 0.2041 | 0.1286 | -0.792 | -0.494 | -0.01  | -1.167 | -1.048 | -0.87  |
| PCHAS_080170 | 0.2847 | -0.051 | 0.0604 | -0.315 | -0.032 | -0.422 | 0.3632 | 0.3851 | -0.119 | -0.082 | 0.2645 | -0.094 |
| PCHAS_102440 | -0.178 | -0.059 | 0.3025 | -0.258 | 0.0321 | -0.077 | -0.57  | -0.308 | 0.021  | 0.643  | 0.3475 | 0.0374 |
| PCHAS_135590 | -0.695 | -0.264 | -0.591 | -0.745 | -0.111 | 0.8523 | 0.1693 | 0.6932 | 0.706  | 0.8338 | 0.1645 | 0.5143 |
| PCHAS_144590 | 0.0871 | 0.326  | 0.3227 | 0.5478 | 0.1475 | 0.2015 | 0.0465 | -0.348 | 0.083  | -1.287 | -1.041 | -0.581 |
| PCHAS_091280 | -0.759 | -0.507 | -0.039 | -0.459 | -0.163 | -0.401 | 0.4464 | 0.499  | -0.256 | 0.6563 | 1.0362 | 0.4865 |
| PCHAS_146780 | 0.1711 | 0.4944 | 0.6275 | 0.5353 | 0.3173 | -0.273 | -1.795 | -1.204 | -0.388 | -2.215 | -2.007 | -1.801 |
| PCHAS_080900 | 0.2385 | 0.4518 | 0.5279 | 0.5779 | 0.2082 | 0.1549 | 0.0679 | -0.588 | 0.1504 | -1.163 | -0.706 | -1.205 |
| PCHAS_093350 | 0.1675 | 0.3498 | 0.3545 | 0.159  | 0.0258 | -0.371 | -0.868 | -0.694 | -0.317 | -0.961 | -1.463 | -1.008 |
| PCHAS_131680 | -0.037 | 0.0336 | 0.6101 | -0.157 | -0.107 | 0.1577 | 0.4875 | 0.2718 | -0.007 | 0.1113 | 0.5442 | -0.099 |
| PCHAS_114070 | 1.019  | 0.4128 | 0.511  | -0.164 | -0.098 | -0.221 | -0.316 | 0.0499 | -0.037 | 0.0069 | -0.22  | 0.4785 |
| PCHAS_136250 | 0.1314 | -0.336 | 0.275  | 0.0691 | 0.0412 | -0.3   | -0.99  | 0.0869 | -0.324 | -0.609 | -0.831 | -0.787 |
| PCHAS_113570 | -1.493 | -0.838 | -0.341 | -0.236 | 0.3148 | 0.1177 | 0.8343 | 0.5398 | 0.1842 | 0.2832 | 0.2095 | 0.1805 |
| PCHAS_080850 | -0.913 | -0.516 | 0.2214 | -0.406 | -0.003 | 0.1688 | 0.7518 | 0.1235 | 0.1301 | -0.674 | -0.597 | -0.723 |
| PCHAS_110440 | 0.0679 | -0.507 | 0.1991 | 0.0226 | 0.0381 | -0.407 | 0.0785 | 0.0825 | -0.278 | -0.275 | -0.637 | -0.242 |
| PCHAS_121490 | -1.023 | -2.082 | -1.676 | -1.131 | -0.213 | 0.4699 | 0.6863 | 0.796  | 0.3728 | 0.7199 | 0.7147 | 0.7234 |
| PCHAS_142960 | -0.237 | -0.129 | -0.147 | 0.2831 | 0.2386 | 0.5323 | 0.0885 | 0.1233 | 0.3343 | -0.087 | -0.656 | -0.147 |
| PCHAS_051650 | 0.9744 | 0.1969 | 0.6857 | 0.0371 | -0.043 | -0.727 | 0.5378 | -0.226 | -0.436 | -0.362 | -1.126 | -0.27  |
| PCHAS_082680 | -1.096 | -0.545 | -0.619 | -9E-04 | -0.015 | 0.3029 | 0.347  | 0.6722 | 0.2402 | 0.0889 | 0.1079 | -0.174 |
| PCHAS_132090 | 0.3713 | 0.3565 | 0.4659 | -0.14  | -0.21  | -0.414 | -0.146 | -0.454 | -0.639 | -0.568 | -0.185 | -0.489 |

|              |        |        |        |        |        |        |        |        |        |        |        |        |
|--------------|--------|--------|--------|--------|--------|--------|--------|--------|--------|--------|--------|--------|
| PCHAS_111140 | 0.4914 | 0.5038 | 0.7246 | 0.372  | 0.2709 | 0.5849 | -0.105 | -0.334 | -0.06  | -1.115 | -0.159 | -0.766 |
| PCHAS_040360 | 0.4    | -0.871 | -0.377 | -1.205 | -0.406 | -0.199 | -0.067 | -0.286 | -0.127 | 0.9801 | 1.9722 | 1.3103 |
| PCHAS_110560 | -0.054 | 0.3664 | 0.5819 | 0.4101 | 0.1061 | -0.475 | -0.39  | -0.575 | -0.366 | -0.703 | -0.757 | -0.696 |
| PCHAS_101000 | -0.711 | -0.463 | 0.0271 | 0.3391 | 0.2939 | 0.1772 | 0.2727 | -0.327 | 0.1403 | -0.575 | -0.984 | -0.69  |
| PCHAS_092990 | 0.0047 | 0.1815 | 0.2237 | 0.2599 | 0.1196 | 0.4229 | 0.4306 | 0.4947 | 0.3245 | -0.405 | 0.371  | 0.1288 |
| PCHAS_080450 | -1.042 | 0.5837 | 0.6395 | 0.4095 | 0.0354 | 0.2992 | -0.188 | -0.081 | 0.0329 | -0.099 | -0.642 | 0.0294 |
| PCHAS_136190 | -0.06  | -0.655 | -0.631 | -0.771 | -0.201 | 0.3302 | -0.467 | -0.384 | 0.2401 | 0.9799 | 1.0773 | 0.9808 |
| PCHAS_030340 | -0.059 | -0.578 | 0.2439 | -0.489 | 0.0986 | 0.1344 | 1.3735 | 0.9812 | -0.193 | 0.279  | 0.7033 | 0.0419 |
| PCHAS_081140 | 0.0284 | 0.3976 | 0.3245 | 0.0587 | -0.131 | -0.348 | -0.487 | -0.628 | -0.204 | -1.449 | -0.65  | -1.146 |
| PCHAS_112910 | -0.037 | 0.3423 | 0.2169 | 0.1491 | 0.1179 | 0.1313 | -0.02  | 0.0409 | -0.028 | -0.538 | -0.141 | -0.24  |
| PCHAS_060410 | -0.63  | -0.216 | -0.234 | 0.2589 | 0.0922 | 0.5693 | 0.6014 | 0.6256 | 0.5317 | 0.1951 | -0.107 | 0.324  |
| PCHAS_083630 | 0.9723 | 0.1086 | 0.5984 | -0.013 | 0.0373 | -0.432 | 0.2266 | -0.225 | -0.113 | -1.543 | -0.553 | -0.78  |
| PCHAS_144440 | -0.199 | -1.166 | -0.694 | -0.711 | -0.268 | -0.044 | -0.328 | -0.035 | -0.178 | -0.041 | 0.4778 | 0.2139 |
| PCHAS_080240 | -0.214 | -0.554 | -0.3   | -0.479 | -0.212 | 0.0237 | 0.2559 | 0.4735 | -0.008 | 0.2665 | 0.0141 | -0.032 |
| PCHAS_071140 | 0.3423 | 0.3311 | 0.6976 | -0.041 | -0.087 | -0.248 | -0.247 | 0.1578 | -0.368 | -0.296 | 0.2279 | -0.241 |
| PCHAS_021000 | -0.72  | -0.128 | 0.0957 | 0.0015 | -0.097 | 0.1001 | 0.4466 | 0.3153 | 0.0744 | 0.0995 | 0.1157 | 0.2406 |
| PCHAS_020430 | 1.0822 | 0.2995 | 0.2876 | 0.0336 | 0.1804 | -0.083 | 0.1757 | 0.2786 | -0.131 | 0.4367 | 0.053  | 0.5293 |
| PCHAS_143060 | -0.349 | -1.14  | -0.526 | -0.319 | 0.0477 | 0.1405 | 0.9332 | 0.7761 | 0.0166 | 0.5849 | 0.9177 | 0.6502 |
| PCHAS_021270 | 0.1459 | 0.1423 | 0.4219 | 0.1764 | 0.092  | -0.077 | 0.6886 | -0.057 | 0.0032 | -0.704 | -0.323 | -0.686 |
| PCHAS_136110 | -1.02  | -0.384 | -0.03  | 0.1433 | 0.0513 | 0.1029 | 0.2193 | 0.4565 | 0.1382 | -0.072 | -0.1   | -0.077 |
| PCHAS_103180 | 0.7095 | 0.5609 | 0.0403 | 0.0601 | -0.136 | -0.476 | -0.069 | -1.01  | -0.331 | -1.799 | -1.44  | -1.282 |
| PCHAS_113100 | -0.073 | 1.0588 | 0.4316 | 0.0357 | 0.1082 | 0.0358 | 0.2717 | 0.2566 | 0.1173 | -0.113 | -0.821 | -0.207 |
| PCHAS_133710 | 0.8358 | 0.3525 | 0.2369 | -0.11  | -0.247 | -0.705 | 0.4425 | -0.485 | -0.701 | -0.982 | 0.1728 | -0.71  |
| PCHAS_101690 | 0.2097 | 0.4715 | 0.006  | 0.6571 | 0.3299 | 0.0518 | -0.224 | -0.643 | -0.084 | -0.146 | 0.4161 | -0.075 |
| PCHAS_092690 | -1.52  | -2.711 | -2.623 | -3.076 | -0.567 | 0.5383 | 0.5722 | 1.257  | 0.5356 | 1.2923 | 0.7081 | 1.139  |
| PCHAS_133660 | 0.5513 | 0.4266 | 0.2256 | 0.317  | 0.1775 | -0.164 | -0.474 | -0.648 | -0.155 | -1.308 | -0.968 | -1.109 |
| PCHAS_143740 | 0.1914 | 0.0375 | 0.527  | 0.1891 | 0.1242 | 0.1537 | -0.15  | 0.3207 | 0.0377 | -0.166 | -0.159 | -0.115 |
| PCHAS_060540 | -0.585 | -0.359 | -0.161 | 0.2609 | 0.1818 | 0.0335 | 0.5757 | 0.5727 | 0.1621 | 0.5141 | 0.8203 | 0.5232 |
| PCHAS_010400 | 0.2742 | 0.3451 | 0.3729 | 0.5273 | 0.1851 | -0.385 | -1.415 | -1.194 | -0.367 | -1.558 | -2.096 | -1.517 |
| PCHAS_093290 | 0.9935 | 0.4107 | 0.402  | 0.2347 | 0.1083 | -0.597 | -0.94  | -1.165 | -0.645 | -1.822 | -0.781 | -1.286 |
| PCHAS_113610 | -0.109 | 0.2026 | 0.6461 | 0.1403 | 0.3029 | 0.1402 | 0.4252 | 0.4609 | 0.0297 | -0.376 | -0.094 | -0.405 |
| PCHAS_145750 | 0.9478 | 0.3405 | 0.5973 | 0.2225 | 0.1239 | -0.305 | -0.35  | -0.632 | -0.283 | -1.372 | -0.611 | -0.844 |
| PCHAS_111540 | 0.2702 | 0.7577 | 0.3611 | -0.142 | 0.2696 | -0.135 | 0.1624 | -0.003 | -0.159 | 0.1427 | 0.1057 | 0.0276 |
| PCHAS_103720 | 0.2165 | 0.0979 | -0.004 | 0.1277 | -0.079 | -0.093 | 0.1227 | -0.267 | -0.145 | -0.268 | -0.047 | -0.18  |
| PCHAS_143850 | 0.3009 | -0.557 | -0.117 | -0.023 | -0.253 | 0.0192 | -0.227 | 0.1577 | 0.403  | 1.878  | 1.6525 | 1.526  |
| PCHAS_000730 | 0.7807 | 0.4146 | 0.8529 | 0.6907 | 0.0604 | 0.5516 | 2.2129 | 0.5686 | 0.3856 | 0.6795 | 0.4444 | 0.2742 |
| PCHAS_021170 | -0.064 | -1.494 | -2.99  | 0.1171 | -1.7   | 1.0318 | 1.1997 | -0.62  | 0.6563 | -0.54  | 0.0182 | -0.264 |
| PCHAS_080780 | -0.324 | 0.224  | 0.0264 | 0.5473 | 0.4402 | 0.1518 | 0.0958 | -0.092 | 0.1812 | -0.182 | -0.624 | -0.196 |
| PCHAS_113070 | 1.2752 | 0.6408 | 0.6304 | 0.0701 | 0.0408 | -0.434 | 0.6588 | -0.35  | -0.041 | -0.44  | 0.4866 | -0.454 |
| PCHAS_010640 | 0.2521 | -0.293 | 0.0527 | 0.5148 | 0.3274 | 0.086  | 0.32   | 0.4742 | 0.1348 | -0.022 | -0.234 | 0.0601 |
| PCHAS_131490 | 0.0512 | 0.1299 | -0.182 | 0.2114 | -0.478 | 0.1656 | 0.1493 | -0.164 | 0.1858 | -0.007 | 0.0519 | -0.217 |
| PCHAS_135060 | 0.5376 | 0.2363 | 0.6894 | 0.991  | 0.0274 | 0.7832 | -0.039 | 0.6095 | 0.675  | -0.089 | 1.2724 | -0.026 |
| PCHAS_052350 | -0.647 | -0.073 | -0.216 | 0.0016 | 0.141  | 0.1264 | 0.9763 | 0.4702 | 0.169  | -0.353 | 0.0053 | -0.463 |
| PCHAS_010710 | -0.681 | -0.08  | 0.0839 | 0.8827 | 0.3365 | 0.3107 | -0.145 | 0.0058 | 0.2759 | -0.613 | -0.883 | -0.508 |
| PCHAS_101290 | 0.7095 | 0.1373 | 0.1092 | -0.057 | -0.202 | -0.211 | -0.47  | 0.0697 | -0.182 | -0.533 | -0.722 | -0.161 |
| PCHAS_144080 | 0.346  | 0.2257 | 0.3591 | 0.2327 | -0.126 | 0.5247 | 0.2544 | -0.019 | 0.4356 | -0.642 | 0.2061 | -0.387 |
| PCHAS_121140 | -1.293 | -0.74  | -0.315 | -0.167 | 0.0669 | 0.0715 | 0.4366 | 0.2458 | 0.2467 | 0.3523 | 0.1189 | 0.3713 |
| PCHAS_041230 | -0.987 | -0.497 | -0.24  | -0.126 | 0.057  | 0.1909 | 0.7691 | 0.6387 | 0.316  | 0.7542 | 0.4308 | 0.1982 |
| PCHAS_141260 | -0.402 | 0.4861 | 1.0218 | 0.0651 | 0.2037 | -0.601 | 1.9231 | 0.0272 | -0.359 | 0.2419 | -0.117 | -0.268 |
| PCHAS_052450 | -1.656 | -1.887 | -1.088 | -2.088 | -0.187 | 0.3922 | 1.2352 | 0.9589 | 0.3753 | 0.3139 | 0.028  | -0.427 |



|              |        |        |        |        |        |        |        |        |        |        |        |        |
|--------------|--------|--------|--------|--------|--------|--------|--------|--------|--------|--------|--------|--------|
| PCHAS_102710 | -0.185 | 0.7508 | 0.4203 | -0.187 | 0.3638 | -0.114 | 0.1707 | 0.2404 | -0.315 | -1.069 | 0.1326 | 0.0547 |
| PCHAS_092830 | 0.1904 | 0.3363 | 0.3029 | 0.2684 | 0.0912 | -0.451 | 0.1945 | 0.2169 | -0.31  | -0.412 | -0.668 | -0.257 |
| PCHAS_130620 | -0.043 | 0.63   | 0.4238 | 0.5333 | 0.0342 | -0.271 | -0.889 | -0.856 | -0.33  | -1.51  | -1.439 | -1.274 |
| PCHAS_103310 | 0.66   | 0.551  | 0.5049 | 0.035  | 0.079  | -0.469 | -0.111 | -1.27  | -0.485 | -1.336 | -0.646 | -0.786 |
| PCHAS_141120 | 0.657  | 0.9986 | 0.5705 | 0.3883 | 0.1582 | 0.2382 | -0.46  | -0.685 | -0.217 | -1.591 | -0.547 | -0.993 |
| PCHAS_143400 | 0.3609 | 0.1029 | 0.4748 | -0.08  | 0.1238 | -0.171 | 0.4368 | 0.2561 | -0.29  | -0.163 | 0.2082 | -0.064 |
| PCHAS_110700 | 0.373  | 0.0951 | 0.361  | 0.3767 | -0.148 | 0.5821 | -1.32  | -0.48  | -0.298 | -0.451 | -0.151 | -0.588 |
| PCHAS_111830 | 0.128  | -0.079 | 0.6887 | 0.1708 | 0.2478 | -0.164 | -0.212 | -0.589 | -0.278 | -0.695 | -0.889 | -0.435 |
| PCHAS_141130 | 0.393  | 0.1676 | 0.7687 | 0.0755 | 0.1372 | 0.2076 | 0.4455 | -0.166 | -0.174 | -1.14  | -0.071 | -1.058 |
| PCHAS_124290 | 0.0548 | 0.1565 | -0.042 | -8E-04 | 0.0701 | -0.165 | -0.091 | -0.029 | -0.212 | -0.256 | -0.143 | 0.0368 |
| PCHAS_141190 | -1.072 | -0.633 | -0.574 | -0.291 | 0.035  | 0.3149 | 0.6584 | 0.6973 | 0.3383 | 0.2529 | 0.0158 | 0.039  |
| PCHAS_110830 | 0.2289 | -0.04  | 0.7716 | -0.138 | 0.1671 | 0.1808 | 0.9392 | 0.233  | 0.0965 | 0.1162 | 0.7514 | -0.255 |
| PCHAS_050980 | 0.07   | 0.1209 | -0.014 | 0.0777 | 0.1175 | 0.0957 | -0.089 | 0.439  | 0.1284 | 0.2352 | 0.2185 | 0.3365 |
| PCHAS_141470 | -1.22  | 0.2671 | 0.0315 | -0.52  | 0.1566 | 0.1273 | -1.012 | 0.5638 | 0.2994 | 0.8674 | 0.7491 | 0.1409 |
| PCHAS_092350 | -0.678 | -0.672 | -0.338 | -0.229 | 0.0654 | 0.3603 | 1.1241 | 0.6029 | 0.2682 | 0.0506 | 0.3255 | -0.169 |
| PCHAS_080720 | -0.5   | -0.993 | -0.106 | 0.3163 | 0.1921 | 0.3562 | 1.2894 | 0.0557 | 0.246  | -0.175 | -0.512 | -0.148 |
| PCHAS_142800 | 0.2705 | -0.149 | 0.3215 | 0.2226 | 0.1584 | -0.05  | -1.021 | -0.532 | -0.205 | -0.733 | -1.146 | -0.621 |
| PCHAS_092420 | -0.064 | 0.2756 | 0.6719 | 0.18   | 0.2105 | 0.8216 | 0.2822 | 0.7132 | 0.3131 | -0.105 | 0.2982 | -0.189 |
| PCHAS_080680 | -0.775 | -0.123 | -0.065 | 0.1357 | 0.2825 | -0.097 | -0.279 | -0.074 | -0.027 | -1.474 | -0.181 | -0.907 |
| PCHAS_110010 | 0.2363 | -0.17  | 0.233  | 0.0269 | 0.0228 | 0.0603 | -0.233 | 0.0083 | 0.0212 | 0.9001 | 1.2512 | 0.9748 |
| PCHAS_130640 | 0.7608 | 0.2051 | 0.214  | 0.2579 | -0.233 | -0.193 | -1.071 | -0.793 | -0.394 | -0.79  | -1.25  | -0.897 |
| PCHAS_112490 | 1.3377 | 0.0525 | 0.7861 | -0.061 | 0.2717 | -0.328 | 1.1708 | 0.6275 | -0.335 | 0.1203 | 0.6492 | -0.416 |
| PCHAS_082800 | -0.191 | 0.2929 | 0.3824 | 0.1022 | 0.009  | 0.1785 | 0.0079 | 0.094  | -0.032 | 0.0377 | 0.3002 | 0.0392 |
| PCHAS_135340 | 0.0874 | -0.785 | -0.665 | -0.7   | -0.145 | 0.3907 | 0.3667 | 0.8224 | 0.4268 | 1.0653 | 0.4331 | 0.5951 |
| PCHAS_121550 | 0.2668 | 0.0888 | 0.2315 | 0.2563 | 0.2551 | 0.1972 | -0.283 | -0.099 | 0.1832 | -0.553 | -0.636 | -0.56  |
| PCHAS_146270 | -0.988 | 0.2284 | 0.3088 | 0.2138 | 0.05   | 0.1008 | -0.336 | -0.408 | -0.055 | -1.481 | -0.743 | -1.194 |
| PCHAS_060890 | -0.878 | -0.462 | -0.054 | -0.104 | 0.2932 | 0.0812 | 0.3883 | 0.645  | 0.0325 | -0.134 | 0.3618 | -0.255 |
| PCHAS_083450 | -0.539 | 0.2487 | 0.0624 | 0.4794 | 0.4261 | 0.3773 | 0.6571 | -0.693 | 0.0548 | -0.484 | -0.325 | -0.436 |
| PCHAS_142640 | 0.3548 | -0.032 | 0.1146 | -0.021 | -0.057 | -0.217 | -0.373 | -0.163 | -0.311 | -1.02  | -0.535 | -0.798 |
| PCHAS_052400 | 0.1656 | -1.542 | -1.333 | -1.741 | -0.531 | -0.03  | -0.234 | -0.802 | 0.0385 | 1.9808 | 2.2776 | 1.5837 |
| PCHAS_010430 | -0.228 | -0.486 | -0.009 | -0.092 | 0.1678 | -0.145 | 0.896  | 0.4922 | -0.122 | -0.138 | 0.2748 | -0.404 |
| PCHAS_071710 | -0.093 | -0.105 | -0.114 | -0.146 | 0.0024 | -0.042 | 0.9457 | 0.2216 | -0.095 | -0.005 | 0.6426 | 0.0201 |
| PCHAS_083560 | 0.6345 | 1.2606 | 0.6132 | -0.101 | -0.716 | -0.393 | -0.449 | -0.287 | -0.789 | -0.582 | -0.145 | -0.238 |
| PCHAS_041310 | 0.467  | 0.1659 | 0.0996 | -0.181 | -0.131 | -0.208 | 0.0602 | -0.004 | -0.304 | 0.2108 | 0.4387 | 0.0883 |
| PCHAS_135980 | -0.645 | 0.1398 | -0.938 | 0.3128 | -0.263 | 0.6028 | 0.4717 | 0.4215 | 0.8548 | 0.5177 | 0.3489 | 0.3096 |
| PCHAS_050180 | -0.392 | -1.1   | -0.525 | -0.833 | -0.146 | 0.0707 | 1.3401 | 0.7943 | -0.083 | 0.4725 | 0.2144 | 0.2756 |
| PCHAS_102810 | -0.502 | 0.4599 | 1.0039 | 0.1865 | 0.0562 | 0.1896 | 0.3788 | 0.0056 | -0.083 | 0.0248 | 0.5126 | -0.326 |
| PCHAS_101100 | 0.0217 | 0.0337 | -0.726 | 0.0426 | 0.0623 | -0.107 | 0.8033 | 0.0348 | -0.277 | -0.5   | 0.2561 | -0.251 |
| PCHAS_061080 | 0.5283 | 0.1457 | 0.7194 | 0.0561 | 0.3434 | -0.407 | 0.55   | -0.408 | -0.336 | -1.21  | -0.103 | -0.883 |
| PCHAS_132190 | -0.062 | -0.526 | 0.1392 | -0.575 | 0.1412 | -0.942 | -0.265 | 0.775  | 0.2532 | 0.5327 | 1.2937 | 0.4994 |
| PCHAS_135040 | 0.5785 | 0.4179 | 0.3929 | 0.2402 | 0.0356 | -0.055 | -0.673 | -0.935 | -0.304 | -0.755 | -0.021 | -0.143 |
| PCHAS_051780 | -0.895 | -0.579 | -0.42  | -0.338 | 0.0967 | 0.0955 | 0.7948 | 0.6708 | 0.06   | 0.2923 | 0.3073 | -0.175 |
| PCHAS_011140 | -0.373 | -0.192 | 0.595  | 0.6291 | -0.018 | 0.845  | -0.503 | 0.2293 | 0.3406 | 0.2444 | 0.3875 | 0.4087 |
| PCHAS_114680 | 0.9696 | 0.3804 | -0.339 | -0.142 | -0.614 | -0.408 | -0.488 | -0.268 | -0.478 | 0.2046 | 1.2818 | 0.2631 |
| PCHAS_103700 | -0.256 | 0.4635 | 0.5452 | 0.2665 | 0.1419 | 0.6039 | 0.4326 | 0.3341 | 0.0631 | -0.307 | 0.5843 | -0.104 |
| PCHAS_071320 | -0.464 | 0.2903 | 0.2696 | 0.0198 | 0.1777 | 0.1293 | 0.2529 | -0.277 | -0.005 | 0.3097 | 0.4967 | -0.03  |
| PCHAS_092870 | 0.1074 | 0.5734 | 0.3861 | 0.0791 | 0.0091 | -0.508 | -0.527 | -0.241 | -0.283 | -0.297 | -0.908 | -0.258 |
| PCHAS_121960 | -0.702 | -0.136 | 0.1234 | 0.1707 | 0.2676 | -0.055 | 0.0757 | 0.4155 | -0.037 | -0.146 | -0.162 | -0.31  |
| PCHAS_040140 | -0.123 | 0.4645 | 0.4942 | 0.352  | 0.2276 | -0.143 | -0.077 | -0.296 | -0.303 | -1.304 | -0.752 | -0.537 |
| PCHAS_030010 | 1.1275 | 0.4669 | 0.1728 | 0.0988 | -0.384 | -0.454 | -0.459 | -0.411 | -0.384 | -0.129 | -0.326 | -0.076 |

|              |        |        |        |        |        |        |        |        |        |        |        |        |
|--------------|--------|--------|--------|--------|--------|--------|--------|--------|--------|--------|--------|--------|
| PCHAS_102830 | 0.5155 | 0.5638 | 0.6154 | 0.0682 | 0.1194 | 0.8657 | 0.2075 | 0.1496 | 0.0314 | -0.149 | 0.6976 | -0.06  |
| PCHAS_131020 | -0.376 | -0.649 | -0.843 | -0.529 | -0.072 | 0.4834 | 0.3561 | 0.4075 | 0.4859 | 0.6134 | -0.025 | 0.8251 |
| PCHAS_123560 | 0.6885 | 0.1328 | 0.4649 | 0.4885 | 0.131  | -0.189 | 0.6669 | -0.294 | -0.151 | -1.333 | -1.756 | -0.704 |
| PCHAS_091930 | 0.8454 | -1.208 | -0.241 | -0.546 | -0.072 | -0.515 | 1.165  | 0.2733 | -0.151 | 0.4185 | 0.7388 | 0.3556 |
| PCHAS_081870 | -0.314 | -0.147 | 0.5106 | 0.1638 | -0.079 | 0.1598 | -0.041 | -0.105 | -0.156 | -0.662 | -0.014 | -0.205 |
| PCHAS_130790 | -0.146 | -0.265 | -0.236 | -0.41  | -0.176 | -0.257 | 0.6159 | 0.5699 | -0.254 | 0.1569 | 0.3689 | 0.0257 |
| PCHAS_132460 | 0.8636 | 0.0617 | 0.5756 | 0.0144 | 0.1754 | -0.26  | 0.4127 | -0.36  | -0.351 | -0.795 | -0.082 | -0.733 |
| PCHAS_141320 | -0.259 | -0.171 | 0.0321 | 0.525  | 0.3168 | 0.237  | -0.748 | -0.319 | 0.1594 | -0.864 | -1.61  | -1.257 |
| PCHAS_083080 | -0.762 | -0.234 | 0.6485 | -0.305 | -0.167 | -0.562 | -0.096 | -0.065 | -0.242 | 0.7945 | 0.5443 | 0.4436 |
| PCHAS_011110 | 0.2118 | -0.094 | -0.321 | -0.391 | 0.118  | -0.045 | -0.55  | -0.401 | -0.081 | 0.7177 | 0.9873 | 0.4688 |
| PCHAS_100320 | -0.334 | 0.3381 | 0.1423 | 0.0114 | 0.0216 | -0.17  | -0.301 | -0.363 | -0.126 | -0.201 | -0.347 | -0.493 |
| PCHAS_140650 | -0.722 | -0.383 | 0.2302 | 0.0424 | 0.3137 | 0.2202 | 0.4194 | 0.3976 | 0.1277 | 0.1165 | 0.3595 | -0.089 |
| PCHAS_112650 | 0.3482 | -0.136 | -0.084 | -0.887 | -0.348 | -0.294 | -0.299 | -0.258 | -0.502 | 0.7002 | 1.0578 | 0.6892 |
| PCHAS_134410 | 0.6247 | 0.3217 | 0.7038 | 0.3432 | 0.1329 | 0.047  | 0.0516 | -0.103 | -0.129 | 0.0164 | -0.364 | -0.035 |
| PCHAS_114360 | -0.201 | -0.305 | -1.598 | 0.4635 | -0.556 | 0.6895 | 0.7346 | -0.625 | 0.6468 | -0.038 | -0.457 | 0.2481 |
| PCHAS_120830 | 0.7596 | 0.2598 | 0.495  | 0.2618 | 0.0136 | -0.104 | 0.4178 | 0.0527 | -0.129 | -0.533 | -0.425 | -0.44  |
| PCHAS_072150 | 0.4981 | 0.1789 | 0.293  | -0.287 | -0.059 | -0.418 | 0.1752 | 0.0012 | -0.304 | -0.343 | 0.9891 | -0.142 |
| PCHAS_010210 | 0.612  | 0.5004 | 0.1354 | 0.4958 | -0.134 | 0.4951 | 0.328  | 0.3495 | 0.2021 | -0.118 | -0.282 | -0.184 |
| PCHAS_030530 | -0.244 | -0.238 | 0.0868 | -0.112 | -0.156 | -0.394 | 0.1969 | 0.2191 | -0.48  | -0.763 | 0.1163 | -0.618 |
| PCHAS_070510 | -0.173 | -0.14  | 0.002  | 0.068  | 0.2253 | 0.0022 | 0.4776 | -0.023 | 0.1013 | -0.724 | -0.823 | -0.722 |
| PCHAS_136000 | 0.0979 | 0.4543 | 0.5737 | 0.38   | 0.2029 | -0.105 | -0.658 | -0.386 | 0.0059 | -1.062 | -0.321 | -0.835 |
| PCHAS_061230 | -0.401 | -0.571 | -0.357 | -0.368 | -0.27  | -0.182 | -0.036 | 0.708  | -0.032 | 1.1235 | 1.1126 | 0.9531 |
| PCHAS_103580 | 0.347  | 0.364  | -0.382 | 0.2004 | 0.0617 | 0.1454 | 0.2174 | 0.1765 | -0.252 | 0.3312 | -0.269 | 0.595  |
| PCHAS_121580 | 0.2779 | 0.044  | 0.0591 | -0.399 | -0.028 | -0.058 | -0.132 | -0.167 | -0.127 | 0.9825 | 2.1611 | 0.7628 |
| PCHAS_143260 | -0.222 | -0.311 | -0.606 | -0.379 | -0.083 | 0.1299 | 0.585  | 0.2183 | 0.1532 | 0.6285 | 0.6144 | 0.4132 |
| PCHAS_082180 | -0.193 | 0.0934 | -0.077 | -0.072 | 0.1744 | -0.224 | -0.142 | -0.491 | -0.488 | -0.422 | -0.524 | -0.213 |
| PCHAS_132610 | 0.7383 | 0.2838 | 0.6441 | 0.5419 | 0.3407 | -0.193 | -0.168 | -0.626 | -0.135 | -1.069 | -0.546 | -0.519 |
| PCHAS_050450 | 0.4864 | 0.0521 | 0.4257 | 0.2296 | 0.2701 | -0.18  | 0.7161 | -0.34  | -0.301 | -0.856 | -0.198 | -0.769 |
| PCHAS_131580 | -0.816 | 0.5962 | 0.9225 | 0.2312 | 0.3681 | -0.177 | -0.2   | 0.2303 | 0.1274 | -0.167 | -0.056 | -0.481 |
| PCHAS_100940 | 0.4265 | -0.001 | -0.075 | -0.104 | 0.0051 | 0.1093 | -0.111 | 0.048  | 0.1481 | 0.0725 | -0.302 | 0.4941 |
| PCHAS_052380 | 0.0237 | -1.757 | 0.4808 | 0.0601 | 0.2384 | 0.0279 | -0.961 | 0.2753 | 0.1245 | -0.018 | 0.8354 | -0.311 |
| PCHAS_072850 | 0.7684 | 0.3447 | 0.5246 | 0.1558 | 0.033  | -0.198 | -0.291 | -0.208 | -0.266 | -0.174 | -0.541 | -0.066 |
| PCHAS_113060 | 0.2533 | -0.037 | 0.3328 | 0.0834 | 0.1538 | -0.439 | 0.5731 | 0.2704 | -0.225 | -0.552 | -0.464 | -0.765 |
| PCHAS_130750 | 0.9608 | -0.167 | -0.8   | -0.002 | -0.51  | 0.2994 | 0.0799 | 0.1818 | 0.2061 | 0.5353 | 0.2349 | 0.4849 |
| PCHAS_083570 | -0.637 | -0.316 | 0.2108 | 0.4347 | 0.4664 | 0.3841 | 0.1304 | 0.4117 | 0.439  | 0.0689 | -0.638 | 0.0718 |
| PCHAS_041210 | -0.288 | 0.879  | 0.8974 | 0.7519 | 0.449  | 0.4131 | -0.25  | -0.207 | 0.2466 | -1.367 | -1.532 | -1.111 |
| PCHAS_110810 | -0.493 | -0.002 | 0.2383 | 0.0637 | 0.3833 | -0.172 | 0.6224 | 0.3524 | -0.168 | -0.355 | -0.168 | -0.283 |
| PCHAS_114350 | -1.43  | -0.726 | -0.532 | -0.311 | -0.21  | 0.0616 | 0.1462 | 0.5333 | 0.135  | -0.121 | -0.024 | -0.512 |
| PCHAS_050710 | -0.186 | 0.5267 | 0.2032 | 0.4933 | 0.2268 | -0.072 | 0.133  | -0.144 | 0.044  | -1.164 | -1.058 | -0.521 |
| PCHAS_083050 | -0.772 | -1.021 | -0.694 | -1.038 | -0.062 | 0.0959 | 0.6591 | 0.1914 | 0.156  | 0.3892 | -0.195 | 0.122  |
| PCHAS_130840 | -0.093 | -0.046 | 0.0625 | 0.0275 | -0.057 | -0.04  | -0.578 | -0.69  | -0.176 | -0.04  | -0.091 | 0.1524 |
| PCHAS_113130 | 0.5544 | 0.3524 | 0.4395 | -0.007 | 0.1652 | -0.581 | 0.0562 | -0.223 | -0.363 | -0.638 | -0.459 | -0.494 |
| PCHAS_136390 | -0.059 | 0.3865 | 0.2845 | 0.462  | 0.1628 | -0.105 | -0.538 | -0.41  | -0.096 | -0.895 | -1.181 | -0.718 |
| PCHAS_120660 | 0.4936 | 0.6598 | 0.0075 | 0.1492 | 0.1653 | -0.263 | 0.0928 | -0.033 | -0.345 | -0.153 | -1.36  | -0.06  |
| PCHAS_141440 | 0.9805 | 0.2268 | 0.423  | -0.06  | 0.133  | -0.414 | 0.9025 | 0.0738 | -0.128 | -1.606 | 0.0415 | -0.989 |
| PCHAS_091440 | 0.1479 | 0.4865 | 0.5334 | 0.1583 | -0.099 | -0.297 | -0.628 | -0.99  | -0.258 | -0.864 | 0.0186 | -0.611 |
| PCHAS_114390 | -0.453 | -0.28  | 0.4985 | 0.3974 | 0.073  | -0.22  | -0.357 | -0.065 | -0.253 | -0.306 | -0.541 | -0.251 |
| PCHAS_030580 | -1.078 | -0.551 | -0.297 | -0.15  | 0.2027 | 0.1728 | 0.3859 | 0.1964 | 0.1562 | -0.358 | -0.499 | -0.559 |
| PCHAS_020780 | -0.658 | 0.1047 | 0.3492 | 0.5099 | 0.2559 | -0.04  | 0.0796 | -0.184 | -0.014 | -0.849 | -0.985 | -0.559 |
| PCHAS_102590 | 0.4504 | 0.147  | 0.2865 | 0.1314 | 0.0302 | 0.2952 | -0.417 | -0.035 | 0.2509 | -0.015 | -0.799 | -0.073 |

|              |        |        |        |        |        |        |        |        |        |        |        |        |
|--------------|--------|--------|--------|--------|--------|--------|--------|--------|--------|--------|--------|--------|
| PCHAS_122300 | -0.727 | -0.337 | -0.197 | -0.224 | -0.089 | 0.0619 | 0.3902 | 0.5926 | 0.0831 | 0.1142 | 0.1798 | -0.066 |
| PCHAS_020530 | 1.1683 | 0.3684 | 0.4323 | -0.038 | 0.0681 | -0.345 | 0.2238 | -0.426 | -0.315 | -0.996 | 0.6893 | -0.627 |
| PCHAS_031460 | -0.431 | -1.524 | -1.1   | -1.212 | -0.336 | 0.1031 | 0.5168 | 0.6826 | 0.1777 | 1.5171 | 1.3669 | 1.1964 |
| PCHAS_083000 | 0.4022 | 0.5011 | 0.0047 | -0.531 | -0.667 | -0.547 | -0.393 | -0.802 | -0.801 | -0.23  | 1.0538 | -0.351 |
| PCHAS_070900 | -0.228 | -0.687 | -0.488 | -0.424 | -0.044 | 0.6486 | -0.503 | 0.5997 | 0.6678 | 1.1889 | 0.4493 | 1.1354 |
| PCHAS_091250 | -0.401 | 0.6191 | 0.4956 | 0.2182 | 0.3151 | -0.492 | 0.1511 | -0.531 | -0.451 | -1.051 | -0.474 | -0.738 |
| PCHAS_040850 | -0.184 | -0.163 | -0.214 | -0.112 | 0.2168 | -0.317 | 0.0279 | -0.205 | -0.271 | -0.971 | -0.258 | -0.971 |
| PCHAS_050680 | 0.5145 | 0.0802 | 0.0502 | -0.448 | -0.097 | -0.667 | 0.2643 | 0.2572 | -0.629 | 0.0699 | 0.3972 | 0.0538 |
| PCHAS_041580 | 1.3989 | 0.712  | 0.2322 | 0.2236 | 0.09   | 0.1917 | 0.412  | -0.141 | 0.2835 | -0.327 | 0.1343 | 0.3393 |
| PCHAS_070080 | 1.5434 | 0.6011 | 0.3685 | -0.293 | -0.372 | -0.344 | -0.452 | 0.4394 | -0.292 | 0.4466 | 2.867  | 0.7762 |
| PCHAS_030730 | -0.654 | -1.55  | -1.702 | -1.325 | -0.191 | 0.2851 | -0.367 | -0.092 | 0.3084 | 0.7756 | 0.903  | 0.4105 |
| PCHAS_113240 | -0.008 | -0.418 | -0.378 | -0.589 | -0.182 | 0.2915 | -0.156 | -0.444 | 0.0616 | 1.3224 | 1.419  | 1.1034 |
| PCHAS_000230 | 1.0454 | 0.3111 | 0.2859 | -0.188 | -0.486 | -0.502 | -0.607 | -0.782 | -0.16  | -0.444 | 0.2269 | -0.336 |
| PCHAS_031530 | 0.2012 | 0.0444 | 0.4456 | 0.4595 | 0.1639 | 0.6139 | -0.098 | 0.0706 | 0.473  | 0.0646 | -0.025 | 0.6817 |
| PCHAS_061190 | -0.946 | -1.687 | -1.788 | -1.731 | -0.475 | 0.3683 | 0.7388 | 1.0896 | 0.3612 | 0.9619 | 0.899  | 0.704  |
| PCHAS_123520 | 0.0554 | 0.24   | 0.2155 | 0.0095 | -0.076 | -0.256 | -0.651 | -0.517 | -0.309 | 0.3765 | -0.702 | -0.752 |
| PCHAS_072740 | -0.131 | -0.414 | -0.113 | -0.029 | 0.0347 | 0.4359 | 0.8821 | 0.9752 | 0.3857 | 0.3349 | -0.021 | 0.424  |
| PCHAS_142450 | 0.322  | 0.4724 | 0.6542 | 0.1258 | 0.5503 | -0.066 | 0.0545 | -0.451 | -0.172 | -1.212 | -0.23  | -1.038 |
| PCHAS_100820 | -0.758 | -0.303 | -0.009 | -0.082 | -0.025 | 0.1055 | 0.486  | 0.4884 | -0.153 | 0.0514 | -0.025 | -0.094 |
| PCHAS_110840 | 0.3033 | -0.864 | -0.461 | -0.301 | 0.1171 | 0.0707 | -0.014 | 0.5628 | 0.085  | 1.0986 | -0.271 | 0.6762 |
| PCHAS_101120 | 0.6152 | 0.464  | 0.2386 | 0.0679 | -0.039 | -0.403 | -0.723 | -0.548 | -0.539 | -0.592 | -0.871 | -0.407 |
| PCHAS_124020 | 0.402  | 0.3003 | 0.422  | 0.1793 | -0.006 | -0.108 | -0.924 | -0.264 | -0.034 | -0.596 | -0.658 | -0.681 |
| PCHAS_120720 | -0.246 | -1.301 | 0.055  | -0.355 | 0.0426 | 0.1626 | 0.8004 | 0.3671 | 0.189  | 0.6492 | 0.7896 | 0.1378 |
| PCHAS_144560 | -0.681 | -0.099 | 0.253  | 0.0926 | 0.2007 | 0.1297 | 0.1124 | 0.3526 | -0.012 | -0.256 | -0.253 | -0.232 |
| PCHAS_123850 | -0.883 | -0.708 | -0.706 | -0.464 | -0.167 | 0.1309 | 0.6381 | 0.6464 | 0.126  | 0.4925 | 0.5021 | 0.2195 |
| PCHAS_141620 | 0.1741 | 0.0215 | 0.289  | 0.13   | -2E-04 | -0.322 | -0.174 | -0.076 | -0.485 | -0.505 | -0.697 | -0.437 |
| PCHAS_070410 | 0.7766 | 0.3141 | 0.3461 | 0.3037 | 0.0914 | 0.4229 | 1.0693 | 0.2476 | 0.5283 | 0.3281 | 0.1486 | -0.023 |
| PCHAS_011430 | 1.619  | 0.637  | 0.1087 | -0.249 | -0.197 | 0.795  | 0.4172 | -0.185 | 0.2178 | 1.9221 | 1.8877 | 2.0054 |
| PCHAS_051370 | -0.074 | 0.8848 | 0.5317 | 0.6212 | 0.1338 | -0.539 | -1.063 | -1.134 | -0.54  | -1.178 | -1.343 | -1.126 |
| PCHAS_113430 | 0.3384 | 0.119  | 0.2986 | 0.2188 | 0.2065 | -0.097 | 0.3938 | -0.47  | -0.156 | -1.548 | -0.701 | -0.788 |
| PCHAS_052390 | 0.6004 | -0.589 | -0.589 | -0.88  | 0.0833 | 0.3577 | -0.152 | -0.509 | 0.4715 | 1.3861 | 1.3423 | 0.8408 |
| PCHAS_100230 | 0.1678 | -0.077 | -0.188 | -0.155 | -0.014 | -0.128 | 0.1374 | -0.135 | -0.201 | -0.16  | -0.572 | -0.137 |
| PCHAS_131190 | -0.138 | -0.061 | 0.4834 | 0.0736 | 0.1816 | 0.102  | 0.6798 | 0.2184 | -0.005 | -1.218 | 0.0924 | -1.143 |
| PCHAS_092230 | 0.224  | 0.1283 | 0.2125 | -0.064 | -0.194 | -0.265 | 0.1869 | -0.025 | -0.112 | -0.29  | -0.04  | -0.406 |
| PCHAS_132470 | 0.1066 | 0.4457 | 0.3361 | 0.4232 | -0.011 | -0.062 | -0.863 | -0.768 | -0.205 | -0.672 | -0.911 | -0.326 |
| PCHAS_062200 | -1.034 | -0.658 | -0.064 | -0.001 | 0.1198 | -0.049 | 0.6392 | 0.8399 | 0.2707 | 0.0567 | 0.412  | 0.6336 |
| PCHAS_062090 | -0.182 | -0.171 | 0.2013 | 0.2149 | 0.1193 | 0.0922 | 0.5333 | 0.4047 | -0.01  | 0.1601 | -0.122 | 0.9071 |
| PCHAS_103710 | 0.2744 | 0.1054 | -0.156 | 0.2784 | -0.287 | -0.265 | -0.358 | -0.206 | -0.244 | -0.434 | 0.2012 | -0.056 |
| PCHAS_103590 | 1.0527 | 0.3455 | -0.248 | 0.1749 | -0.002 | -0.417 | -0.342 | -0.583 | -0.493 | -0.641 | 0.5539 | -0.288 |
| PCHAS_092190 | -0.992 | -1.628 | -1.032 | -1.831 | -0.372 | 0.4014 | 1.1011 | 0.9903 | 0.4557 | 0.9512 | 0.3813 | 0.6696 |
| PCHAS_100190 | 0.6401 | 0.4784 | 0.3465 | 0.0592 | -0.107 | -0.084 | -0.397 | -0.062 | -0.098 | 0.1745 | -0.307 | 0.0315 |
| PCHAS_060600 | -0.295 | -0.113 | -0.076 | -0.529 | -0.256 | -0.029 | -0.056 | -0.191 | -0.066 | 0.1663 | 0.4305 | 0.5149 |
| PCHAS_050390 | 0.1819 | -0.372 | 0.5732 | 0.1758 | 0.2905 | 0.2797 | 0.7387 | 0.1429 | 0.2437 | 0.2705 | 0.1755 | 0.044  |
| PCHAS_050260 | 0.0044 | -0.221 | -0.013 | -0.014 | -0.002 | 0.1698 | -0.019 | -0.322 | 0.2017 | 0.3423 | 1.0254 | 0.4947 |
| PCHAS_030870 | -0.345 | -0.031 | 0.1588 | 0.2271 | 0.1685 | 0.3226 | 0.0642 | -0.054 | -0.064 | -0.746 | -0.318 | -0.743 |
| PCHAS_144910 | -1.84  | -1.614 | -1.476 | -0.328 | -0.022 | 0.4118 | 0.5915 | 0.6879 | 0.4366 | -0.627 | -0.381 | -0.728 |
| PCHAS_061690 | -0.138 | -0.404 | -0.573 | -0.801 | -0.194 | 0.8225 | 0.139  | 0.3312 | 0.5837 | 0.5386 | 0.3904 | 1.2709 |
| PCHAS_093520 | -1.101 | -0.447 | -0.104 | -0.515 | -0.181 | 0.0308 | 0.3619 | 0.3319 | 0.1903 | 0.0929 | -0.169 | -0.044 |
| PCHAS_041820 | 0.0755 | 0.1547 | 0.1908 | 0.3383 | 0.0684 | 0.0695 | -0.605 | -0.621 | 0.0523 | -1.194 | -1.181 | -1.3   |
| PCHAS_040570 | -0.927 | -0.462 | -0.266 | -0.383 | 0.0047 | 0.2026 | 0.1868 | 0.3803 | 0.2638 | 0.1757 | -0.101 | 0.1473 |

|              |        |        |        |        |        |        |        |        |        |        |        |        |
|--------------|--------|--------|--------|--------|--------|--------|--------|--------|--------|--------|--------|--------|
| PCHAS_042000 | -0.114 | 0.4166 | 0.2274 | 0.0987 | -0.097 | -0.482 | -1.154 | -0.691 | -0.57  | -0.728 | -1.376 | -1.056 |
| PCHAS_131010 | -0.425 | 0.0647 | 0.0589 | 0.2004 | 0.1166 | 0.429  | 0.1809 | -0.1   | 0.3634 | 0.5498 | -0.291 | 0.4069 |
| PCHAS_110430 | 0.0167 | 0.4044 | 0.3123 | 0.2808 | 0.1284 | 0.0683 | 0.0288 | -0.154 | 0.0557 | -0.494 | -0.776 | -0.288 |
| PCHAS_140210 | 0.4944 | 0.4759 | 0.1708 | 0.3016 | -0.142 | 0.1922 | 0.1305 | 0.4633 | -0.617 | 0.7408 | 1.1467 | 0.6067 |
| PCHAS_103960 | -0.622 | 0.8775 | 0.4675 | 0.0121 | 0.4802 | 0.6119 | 0.5417 | 0.0831 | 0.4754 | -0.583 | -0.997 | -0.729 |
| PCHAS_124170 | -0.04  | 0.4121 | 0.3506 | 0.2113 | -0.006 | 0.0787 | -0.106 | -0.126 | 0.1599 | -0.231 | -0.017 | -0.214 |
| PCHAS_122060 | -0.452 | -0.425 | -0.117 | 0.0505 | 0.084  | 0.4507 | 0.6687 | 0.7083 | 0.4433 | 1.3508 | 0.7508 | 1.1083 |
| PCHAS_091510 | -0.735 | -0.173 | 0.3739 | 0.2066 | 0.0448 | 0.4169 | 0.6622 | -0.358 | 0.1883 | -1.183 | -0.746 | -0.71  |
| PCHAS_081020 | -0.392 | 0.663  | 0.1739 | -0.705 | -0.395 | -0.262 | -0.159 | -0.379 | -0.317 | 0.3817 | 1.294  | 0.407  |
| PCHAS_144370 | 0.1434 | 0.1513 | 0.0462 | -0.298 | -0.332 | -0.411 | -0.544 | -0.265 | -0.416 | 0.1722 | 0.2181 | 0.2622 |
| PCHAS_020440 | -0.307 | -0.276 | 0.5725 | 0.0347 | 0.2561 | -0.339 | 0.8225 | -0.034 | -0.043 | -0.059 | 0.2808 | -0.145 |
| PCHAS_132450 | -0.252 | -1.091 | -0.401 | -0.723 | -0.137 | 0.0929 | 1.4698 | 0.6832 | 0.1168 | 0.2854 | 0.6023 | 0.1073 |
| PCHAS_093150 | 0.3286 | -0.253 | -0.352 | -0.283 | -0.064 | -0.087 | 0.3004 | 0.3067 | -0.386 | 0.0762 | 1.0782 | 0.2524 |
| PCHAS_111530 | -0.337 | -1.166 | -1.059 | -0.922 | -0.81  | 0.0887 | 0.2779 | 0.6505 | -0.057 | 0.671  | 0.6859 | 0.6352 |
| PCHAS_110290 | 0.2605 | 0.0387 | 0.023  | 0.1499 | 0.06   | -0.212 | 0.054  | -0.267 | -0.304 | -0.582 | -0.615 | -0.242 |
| PCHAS_092220 | -0.204 | 0.4895 | 0.2352 | 0.4674 | 0.1624 | 0.5422 | 0.2592 | 0.213  | 0.3329 | -0.301 | -0.335 | -0.309 |
| PCHAS_121440 | 0.0812 | 0.4302 | 0.4069 | 0.4273 | 0.1726 | -0.325 | -0.433 | -0.345 | -0.302 | -0.76  | -0.038 | -0.599 |
| PCHAS_020740 | 0.5217 | -0.269 | -0.359 | -0.644 | -0.181 | 0.7167 | -0.371 | -0.454 | 0.3941 | 1.328  | 1.7975 | 0.9507 |
| PCHAS_133340 | -0.07  | 0.0739 | 0.16   | -0.115 | -0.167 | -0.333 | -0.026 | 0.0234 | -0.303 | -0.302 | 0.2802 | -0.186 |
| PCHAS_031740 | 0.698  | 0.6427 | 0.3156 | 0.471  | 0.0937 | 0.1252 | -0.55  | -0.883 | -0.224 | -1.512 | -1.342 | -1.169 |
| PCHAS_090790 | 0.0844 | 0.1367 | 0.0371 | 0.5211 | 0.0731 | -0.018 | -0.386 | -0.258 | 0.0615 | -0.257 | -0.769 | -0.252 |
| PCHAS_072790 | -0.282 | -0.327 | -0.494 | -0.754 | -0.289 | -0.071 | 0.0579 | 0.2287 | -0.044 | 0.6387 | 0.9149 | 0.5908 |
| PCHAS_133580 | -0.032 | -0.174 | 0.0607 | -0.211 | -0.052 | -0.01  | -0.155 | 0.4018 | -0.037 | 0.6917 | 0.2764 | 0.3722 |
| PCHAS_061840 | -0.873 | 0.2344 | 0.541  | -0.034 | 0.127  | -0.265 | 0.4637 | 0.1242 | 0.1545 | -1.042 | -0.754 | -0.045 |
| PCHAS_131100 | 0.0354 | 0.0037 | 0.202  | 0.4401 | 0.2099 | -0.016 | 0.3213 | 0.2163 | 0.0447 | -0.139 | -0.075 | -0.079 |
| PCHAS_070750 | 0.5806 | 0.3647 | 0.526  | 0.114  | -0.195 | -0.05  | -0.098 | -0.072 | -0.006 | 0.1671 | 0.3249 | -0.281 |
| PCHAS_040610 | -0.116 | 0.0776 | 0.0857 | 0.1955 | 0.2818 | 0.1936 | 0.3327 | 0.0101 | 0.1516 | -1     | -0.488 | -0.312 |
| PCHAS_040390 | 0.1096 | 0.0775 | 0.3395 | 0.2716 | 0.1164 | -0.154 | -0.098 | 0.189  | -0.12  | -0.072 | -0.013 | -0.167 |
| PCHAS_081800 | 0.6074 | 0.3086 | 0.3882 | -0.963 | -0.653 | -0.686 | -0.119 | -0.418 | -0.857 | -0.025 | 0.2713 | 0.08   |
| PCHAS_050140 | -0.376 | -0.865 | -0.374 | 0.3622 | 0.0134 | 1.7009 | 1.9642 | 1.0815 | 1.0254 | 0.4835 | 0.1548 | 0.1161 |
| PCHAS_130180 | 0.144  | -0.099 | -0.546 | -1.302 | -0.849 | -0.347 | -1.242 | -0.026 | -0.271 | 1.379  | 2.551  | 1.5141 |
| PCHAS_071980 | -0.049 | 0.2698 | 0.783  | 0.4162 | 0.2781 | 0.0696 | 0.6633 | -0.182 | 0.0429 | -0.993 | -0.665 | -0.735 |
| PCHAS_144400 | 0.0057 | -0.739 | -1.126 | 0.0589 | -0.147 | 0.7992 | 0.58   | 0.0913 | 0.6699 | 0.7304 | 0.7673 | 0.5591 |
| PCHAS_082280 | 0.477  | 0.3009 | 0.3334 | 0.246  | 0.3216 | -0.049 | -0.304 | -0.166 | 0.0654 | -0.1   | 0.6374 | 0.3772 |
| PCHAS_135320 | -0.911 | -0.391 | -0.486 | 0.2495 | 0.1372 | 0.0665 | -0.009 | 0.4949 | 0.0802 | 0.2286 | -0.031 | 0.2149 |
| PCHAS_137080 | 0.45   | 1.1931 | 0.7063 | -0.026 | -0.284 | -0.06  | 0.81   | 0.5797 | -0.094 | 0.7461 | 1.3727 | 0.4133 |
| PCHAS_135410 | 0.4998 | 0.2164 | 0.1412 | -0.278 | -0.168 | -0.434 | 0.261  | 0.1806 | -0.475 | 0.4066 | 0.549  | 0.2727 |
| PCHAS_020970 | 2.15   | 0.4189 | 0.3953 | 0.19   | -1.358 | -0.456 | 0.1864 | 0.1223 | -0.4   | -0.262 | 0.2476 | -0.515 |
| PCHAS_131370 | -1.003 | -1.63  | -1.36  | -0.878 | -0.369 | 0.4252 | 0.4756 | 0.4276 | 0.4609 | 1.2328 | 0.9906 | 1.2171 |
| PCHAS_134850 | 0.1014 | 0.1023 | 0.5046 | 0.0667 | 0.2989 | -0.324 | 0.3518 | -0.314 | -0.356 | -1.268 | -0.296 | -0.995 |
| PCHAS_051700 | 0.6939 | 0.2171 | 0.1227 | 0.1013 | -0.087 | -0.64  | -1.066 | -0.947 | -0.792 | -0.603 | -0.512 | -0.176 |
| PCHAS_060520 | -0.785 | 0.4003 | 0.4375 | -0.046 | 0.1758 | -0.244 | 0.144  | 0.4419 | -0.097 | 0.2808 | 0.1589 | 0.0608 |
| PCHAS_111590 | 0.0773 | -0.013 | 0.133  | -0.193 | -0.106 | -0.205 | 0.4259 | 0.1377 | -0.24  | -0.305 | -0.396 | -0.4   |
| PCHAS_114230 | -0.503 | -0.022 | -0.027 | 0.4466 | 0.4352 | 0.1018 | -0.082 | -0.38  | 0.1966 | -1.365 | -1.505 | -0.93  |
| PCHAS_131290 | 0.3088 | -0.234 | -0.033 | -0.225 | 0.0652 | -0.391 | -0.305 | -0.458 | -0.21  | -0.093 | 0.0654 | 0.1138 |
| PCHAS_093710 | 0.1716 | 0.4414 | 0.9048 | -0.337 | -0.073 | -0.111 | 0.0333 | -0.603 | -0.292 | -0.571 | 1.1621 | 0.239  |
| PCHAS_010200 | -0.102 | -1E-04 | 0.105  | 0.2882 | 0.1764 | -0.004 | 0.5237 | 0.394  | 0.1159 | 0.091  | 0.1356 | -0.462 |
| PCHAS_132280 | -0.518 | -0.144 | 0.2396 | 0.1533 | 0.1724 | -0.282 | 0.4882 | 0.0932 | -0.106 | -0.057 | -0.263 | 0.1629 |
| PCHAS_100350 | 0.5222 | -0.638 | -0.805 | -0.084 | -0.345 | 0.3144 | 0.5437 | 0.3398 | 0.0899 | 0.7896 | 1.1657 | 0.5505 |
| PCHAS_051250 | 0.9833 | 0.4884 | 0.5325 | 0.4668 | -0.029 | -0.551 | -0.174 | -0.334 | -0.276 | -1.469 | -0.675 | -0.705 |

|              |        |        |        |        |        |        |        |        |        |        |        |        |
|--------------|--------|--------|--------|--------|--------|--------|--------|--------|--------|--------|--------|--------|
| PCHAS_031100 | -0.544 | -0.596 | -0.029 | -0.205 | -0.15  | -0.065 | 0.8101 | 0.72   | -0.005 | 0.8853 | 1.1039 | 0.8184 |
| PCHAS_092250 | 0.6486 | 0.4886 | 0.4777 | 0.2126 | -0.003 | -0.458 | -0.338 | -0.797 | -0.374 | -1.567 | -0.355 | -0.732 |
| PCHAS_102840 | 0.1314 | -0.231 | 0.1008 | -0.142 | -0.065 | 0.141  | 0.4334 | -0.107 | -0.022 | 0.0876 | -0.521 | 0.2131 |
| PCHAS_031200 | -0.386 | -0.075 | -0.074 | 0.1674 | 0.2154 | -0.348 | -0.405 | -0.506 | -0.641 | -0.091 | 0.2129 | -0.096 |
| PCHAS_020650 | -0.126 | 0.2639 | 0.4244 | 0.4343 | 0.1627 | 0.0217 | -0.343 | -0.912 | -0.182 | -2.117 | -0.939 | -1.112 |
| PCHAS_072580 | 0.1439 | 0.529  | 0.4172 | 0.6848 | 0.3733 | 0.7959 | 0.1289 | -0.325 | 0.6303 | -0.882 | -0.62  | -0.511 |
| PCHAS_130430 | 0.0377 | 0.3305 | 0.3221 | 0.3795 | 0.1371 | -0.043 | -0.038 | -0.46  | -0.186 | -1.324 | -1.065 | -0.635 |
| PCHAS_131960 | 0.4652 | 0.4249 | 0.8675 | 0.2079 | -0.094 | -0.195 | -0.279 | -0.294 | -0.219 | -0.336 | -0.223 | -0.494 |
| PCHAS_020580 | 0.3317 | 0.2527 | 0.9262 | 0.1769 | -0.038 | 0.0863 | 0.1553 | 0.1388 | -0.014 | -0.188 | 0.1064 | -0.204 |
| PCHAS_123070 | 1.488  | 0.109  | 0.8426 | 0.0378 | -0.023 | 0.2621 | -0.114 | 0.0754 | 0.1241 | 0.6052 | 0.1469 | 0.0096 |
| PCHAS_080950 | -0.152 | 0.0734 | 0.4098 | 0.1516 | -0.074 | 0.2858 | -0.473 | 0.6067 | 0.0579 | 0.9061 | 1.1155 | 0.523  |
| PCHAS_111170 | -0.499 | 0.2832 | 0.3688 | 0.3344 | 0.1155 | 0.4992 | 1.1242 | 0.5094 | 0.3084 | -0.126 | 0.1324 | -0.386 |
| PCHAS_142510 | -0.127 | 0.1864 | -0.367 | 0.017  | -0.053 | -0.051 | 0.0148 | -0.334 | -0.12  | -0.468 | -0.547 | -0.538 |
| PCHAS_141700 | 0.1293 | -0.123 | 0.5911 | 0.0646 | -0.041 | -0.544 | 0.0736 | 0.4553 | -0.259 | 0.2027 | -0.075 | 0.4479 |
| PCHAS_092330 | 0.8174 | 0.5466 | 0.4877 | 0.1188 | 0.1376 | 0.4795 | 0.1581 | -0.214 | 0.0661 | -0.936 | -0.221 | -0.527 |
| PCHAS_020630 | 0.1379 | -0.374 | 0.0196 | -0.21  | -0.333 | -0.089 | -0.44  | 0.0344 | -0.218 | -0.188 | 0.587  | 0.3042 |
| PCHAS_071330 | 0.3493 | 0.252  | 0.3529 | 0.28   | 0.0929 | 0.0376 | 0.4947 | -0.173 | -0.412 | -0.876 | -0.356 | -0.442 |
| PCHAS_050860 | -0.806 | -0.264 | 0.0611 | 0.0918 | 0.3759 | 0.1925 | 1.1764 | 0.8691 | 0.2192 | 0.2324 | 0.7366 | -0.009 |
| PCHAS_110030 | -1.615 | -1.036 | -0.65  | -0.379 | -0.06  | 0.311  | 0.9066 | 1.0876 | 0.3216 | 0.4267 | -0.228 | 0.0818 |
| PCHAS_082880 | 0.0838 | 0.2596 | -0.246 | 0.1802 | 0.0069 | 0.356  | 0.4537 | 0.2057 | 0.3557 | 0.4321 | 0.5625 | 0.5525 |
| PCHAS_050820 | 0.5896 | 0.5016 | 0.317  | 0.0158 | -0.1   | -0.004 | -0.714 | -0.257 | 0.0472 | -0.495 | -0.973 | -0.426 |
| PCHAS_091740 | 0.4034 | 0.21   | 0.0917 | 0.3882 | -0.032 | 0.6401 | -0.003 | -0.122 | 0.6903 | -0.09  | 0.1162 | 0.2973 |
| PCHAS_123310 | 0.381  | 0.5714 | 0.5856 | 0.5265 | 0.2142 | 0.3108 | -0.535 | -0.588 | -0.176 | -1.194 | -0.823 | -0.782 |
| PCHAS_123540 | 0.2552 | 0.117  | 0.0884 | 0.0083 | 0.125  | -0.11  | -0.065 | -0.027 | -0.127 | -0.447 | -0.158 | -0.44  |
| PCHAS_121590 | 0.6593 | 0.3388 | 0.5051 | 0.0823 | -0.093 | -0.483 | -0.298 | 0.0372 | -0.446 | -0.892 | 0.1911 | -0.575 |
| PCHAS_120770 | 0.7275 | 0.4921 | 0.4659 | 0.0871 | 0.0737 | -0.481 | -0.638 | -0.788 | -0.492 | -0.903 | -0.181 | -0.364 |
| PCHAS_101650 | 0.398  | 0.5225 | 0.3997 | 0.0064 | -0.23  | -0.764 | 0.5003 | -0.414 | -0.72  | -0.595 | 0.0111 | -0.552 |
| PCHAS_101600 | 0.5081 | 0.3656 | 0.3682 | 0.2357 | -0.162 | -0.708 | -0.315 | -0.057 | -0.655 | 0.1514 | 0.1473 | 0.2027 |
| PCHAS_050360 | 0.0242 | 0.0142 | 0.4752 | 0.4416 | 0.2354 | 0.2865 | -0.083 | 0.0708 | 0.0784 | -0.591 | -0.93  | 0.7147 |
| PCHAS_021050 | 0.143  | 0.1736 | 0      | 0.6899 | -0.015 | -0.186 | -0.257 | -0.579 | -0.369 | -0.675 | -0.446 | -0.149 |
| PCHAS_110110 | 0.492  | 0.4527 | 0.5493 | 0.4853 | 0.3419 | -0.011 | 0.2001 | -0.3   | -0.18  | -1.33  | -0.65  | -0.427 |
| PCHAS_124150 | -0.756 | -0.219 | -0.018 | -0.717 | -0.141 | -0.532 | 0.1538 | 0.3741 | -0.439 | 1.0618 | 0.8253 | 1.0208 |
| PCHAS_021110 | 0.3825 | 0.0855 | 0.402  | 0.1612 | 0.0361 | 0.0561 | -0.288 | -0.132 | 0.0924 | -0.372 | -0.423 | -0.619 |
| PCHAS_000550 | 1.7401 | 0.6678 | -0.712 | -0.416 | -1.053 | -0.612 | -2.452 | -1.325 | -0.953 | -1.194 | -0.408 | -0.408 |
| PCHAS_121830 | -0.204 | -1.01  | -0.524 | -1.018 | -0.512 | -0.645 | -0.157 | 0.0412 | -0.339 | 0.1818 | 0.8267 | 0.235  |
| PCHAS_101310 | -0.11  | 1.0283 | 0.8867 | 0.402  | -0.04  | -0.238 | 0.5475 | 0.1701 | -0.128 | 0.5978 | 0.5673 | 0.1985 |
| PCHAS_140550 | -0.3   | 0.1119 | 0.0692 | 0.1153 | 0.2449 | 0.6365 | 0.8249 | 0.4948 | 0.4593 | 0.5355 | 0.1755 | 0.5994 |
| PCHAS_131200 | 0.1062 | 0.2603 | -0.159 | 0.308  | 0.1226 | 0.3065 | 0.7541 | 0.6908 | 0.335  | 0.3827 | 0.2823 | 0.5483 |
| PCHAS_112020 | 0.4179 | 0.3105 | 0.1302 | 0.0371 | 0.1663 | 0.1061 | -0.987 | -0.159 | -0.076 | -0.706 | -0.47  | -0.485 |
| PCHAS_145710 | 0.4614 | 0.6506 | 0.7515 | 0.1692 | 0.0985 | -0.094 | 0.1069 | -0.164 | -0.075 | -0.495 | -0.393 | -0.239 |
| PCHAS_081250 | 0.2446 | 0.1843 | 0.234  | -0.204 | 0.0349 | -0.043 | -0.082 | -0.204 | 0.0029 | 0.8962 | 1.9632 | 0.8814 |
| PCHAS_091410 | -0.479 | -0.296 | -0.459 | 0.0459 | -0.062 | 0.4408 | 0.1845 | 0.2172 | 0.3165 | 0.6086 | 0.3476 | 0.5372 |
| PCHAS_020600 | 0.5151 | 0.2101 | 0.2727 | 0.6051 | 0.182  | 0.3943 | 0.8994 | 0.7527 | 0.822  | 0.3127 | 0.8458 | 0.4568 |
| PCHAS_133600 | 0.1279 | 0.1821 | 0.0798 | -0.037 | -0.021 | 0.3708 | -0.589 | -0.122 | 0.2563 | -0.119 | -1.055 | 0.1095 |
| PCHAS_146090 | -0.267 | -0.111 | 0.0312 | 0.0684 | 0.1423 | 0.0036 | 0.5834 | 0.0028 | -0.142 | -0.791 | 0.0069 | -0.742 |
| PCHAS_052040 | 0.1241 | -0.421 | -0.64  | -0.643 | -0.27  | 0.0849 | 0.4507 | 0.4579 | 0.101  | 0.4004 | 0.162  | 0.4077 |
| PCHAS_133330 | 0.7244 | 1.1739 | 0.5731 | 0.4108 | 0.1781 | 0.5064 | 0.0965 | -0.442 | 0.2921 | -1.872 | -0.739 | -0.85  |
| PCHAS_101560 | -0.953 | -0.002 | 0.4619 | 0.1846 | 0.1562 | 0.2882 | -0.027 | 0.1461 | 0.3086 | 0.3268 | 0.0063 | 0.2658 |
| PCHAS_071430 | 0.0907 | 0.1295 | 0.5194 | 0.2765 | 0.1673 | 0.0684 | 0.0836 | 0.0338 | 0.0165 | -0.235 | -0.38  | -0.143 |
| PCHAS_080340 | 0.2131 | -0.806 | -0.733 | -0.558 | -0.215 | 0.2992 | 0.8237 | 0.6692 | 0.2965 | 0.7647 | 0.197  | 0.6465 |

|              |        |        |        |        |        |        |        |        |        |        |        |        |
|--------------|--------|--------|--------|--------|--------|--------|--------|--------|--------|--------|--------|--------|
| PCHAS_110920 | 0.1394 | -0.211 | -0.093 | -0.332 | -0.473 | 0.0667 | -0.566 | 0.0378 | -0.257 | 0.2352 | 0.7716 | 0.0355 |
| PCHAS_050620 | -0.333 | -0.284 | -0.397 | -0.028 | 0.0714 | 0.5021 | -0.327 | 0.0302 | 0.4655 | 0.1076 | -0.08  | 0.4776 |
| PCHAS_114170 | 0.4711 | 0.0675 | 0.3348 | -0.267 | -0.104 | -0.623 | -0.619 | -0.094 | -0.681 | -0.995 | -0.536 | -0.549 |
| PCHAS_052470 | -0.053 | -0.026 | -0.251 | -0.34  | -0.216 | 0.2447 | -0.668 | -0.569 | 0.0032 | 0.7502 | 1.1626 | 0.71   |
| PCHAS_010540 | 0.1521 | 0.6161 | 0.4052 | -0.091 | -0.021 | -0.565 | -0.808 | -0.549 | -0.649 | -0.153 | 0.0609 | -0.335 |
| PCHAS_101520 | 0.5081 | 0.5538 | 0.501  | 0.6925 | 0.3896 | 0.0032 | -0.926 | -0.818 | -0.116 | -1.936 | -2.485 | -1.127 |
| PCHAS_130830 | 0.295  | 0.3193 | 0.2225 | 0.0214 | 0.0906 | -0.026 | 0.1234 | 0.0305 | -0.103 | -0.591 | -0.359 | -0.273 |
| PCHAS_130480 | 0.5082 | -0.588 | -0.673 | -0.582 | -0.26  | -0.388 | -0.301 | -0.108 | -0.385 | 1.1244 | 1.8356 | 1.0935 |
| PCHAS_134150 | 0.1241 | -0.409 | 0.408  | -0.281 | -0.033 | 0.3899 | 0.3602 | -0.059 | -0.07  | 0.5543 | 0.8523 | 0.3571 |
| PCHAS_061270 | -0.074 | 0.2104 | 0.39   | 0.1279 | 0.1634 | -0.352 | 0.8548 | -0.091 | -0.124 | -0.868 | -0.771 | -0.421 |
| PCHAS_021260 | 0.0417 | 0.4931 | 0.3376 | 0.3818 | 0.1616 | -0.321 | -0.565 | -0.577 | -0.242 | -1.198 | -1.173 | -0.471 |
| PCHAS_031240 | 0.1989 | 0.5615 | 0.7575 | 0.534  | 0.3553 | 0.1198 | 1.1337 | 0.4309 | 0.03   | -0.123 | 0.5686 | 0.0288 |
| PCHAS_100570 | -0.394 | -0.101 | -0.15  | -0.205 | 0.002  | -0.251 | 0.5658 | 0.7066 | -0.118 | 0.3348 | 0.5644 | 0.1823 |
| PCHAS_145290 | 0.1638 | 0.4319 | 0.6547 | 0.1972 | -0.107 | -0.58  | -0.582 | -0.299 | 0.3918 | -0.306 | 0.085  | -0.098 |
| PCHAS_143050 | 0.1252 | 0.6167 | 0.2577 | 1.2082 | 0.4386 | 0.0241 | -1.568 | -0.992 | 0.027  | -2.207 | -1.849 | -1.511 |
| PCHAS_020320 | -0.079 | 0.0537 | 0.1712 | -0.254 | -0.012 | -0.281 | -0.188 | -0.089 | -0.44  | -0.751 | -0.591 | -0.138 |
| PCHAS_070920 | -0.451 | 0.1224 | 0.1257 | 0.1486 | 0.2534 | 0.2009 | -0.158 | 0.1341 | 0.1682 | -0.08  | 0.5751 | 0.5664 |
| PCHAS_070580 | -0.42  | 0.3312 | 0.4133 | 0.4088 | 0.2412 | -0.122 | -0.6   | -0.12  | 0.1024 | 0.0182 | -1.103 | 0.2703 |
| PCHAS_102470 | 0.2105 | 0.0232 | 0.1718 | -0.213 | -0.193 | -0.301 | -0.008 | -0.133 | -0.316 | -0.244 | 0.5571 | -0.151 |
| PCHAS_041800 | -0.444 | -0.429 | 0.1721 | -0.223 | 0.1442 | -0.566 | 0.3593 | 0.2428 | -0.443 | -0.028 | 0.5677 | -0.106 |
| PCHAS_060940 | 0.1895 | -0.021 | 0.9578 | -0.031 | 0.3831 | -0.085 | 0.8699 | 0.1695 | -0.007 | -0.341 | 0.5336 | -0.613 |
| PCHAS_083720 | 1.8073 | 0.648  | 0.7486 | 0.3611 | 0.0443 | -0.769 | 0.5359 | 0.9159 | 1.1867 | -0.15  | 0.0663 | 1.1644 |
| PCHAS_080260 | 0.3757 | 0.1324 | -0.023 | 0.0676 | 0.2132 | 0.0978 | -1.004 | -0.681 | 0.0798 | -0.709 | -1.236 | -0.641 |
| PCHAS_130760 | 0.4113 | -1.318 | -0.317 | -0.792 | -0.059 | -0.115 | 0.8149 | 0.6659 | -0.255 | 0.0262 | 0.2117 | -0.224 |
| PCHAS_112600 | -0.663 | -0.36  | -0.523 | -0.458 | 0.0142 | -0.066 | 0.4741 | 0.1731 | 0.1814 | 0.1085 | -0.137 | -0.089 |
| PCHAS_093090 | 1.4406 | -0.28  | -0.253 | 0.015  | 0.0169 | 0.0716 | 0.88   | 0.1955 | -0.012 | 0.8775 | 1.9995 | 0.4585 |
| PCHAS_135550 | -0.478 | 0.1625 | 0.3231 | 0.2763 | 0.1393 | 0.0038 | -0.184 | -0.541 | -0.036 | -0.902 | -0.461 | -0.619 |
| PCHAS_103070 | 0.0583 | 0.4213 | 0.2451 | 0.1922 | 0.0534 | -0.2   | 0.4147 | -0.093 | -0.077 | -1.217 | -0.894 | -0.955 |
| PCHAS_050420 | -0.038 | -0.917 | -0.263 | -0.962 | -0.376 | -0.013 | 0.3364 | -0.217 | -0.342 | 1.7295 | 2.3664 | 1.4826 |
| PCHAS_113270 | -0.765 | -0.395 | -0.259 | 0.2298 | 0.3252 | 0.0721 | 0.4794 | 0.4754 | 0.1011 | -0.386 | 0.4695 | -0.417 |
| PCHAS_041290 | -0.33  | -0.569 | -0.184 | -0.283 | 0.0933 | 0.3112 | 0.4298 | 0.5875 | 0.0695 | 0.8973 | 0.2012 | 0.2143 |
| PCHAS_020790 | 0.4191 | 0.0968 | 0.0759 | 0.4351 | 0.0684 | 0.0653 | -0.252 | -0.078 | 0.0817 | -0.072 | -0.912 | 0.2527 |
| PCHAS_091030 | 0.0455 | -0.491 | 0.8054 | 0.1531 | -0.218 | -0.214 | -0.152 | -0.465 | -0.142 | 0.0471 | 0.0158 | -0.427 |
| PCHAS_082500 | -1.054 | -0.617 | -0.848 | -0.208 | 0.024  | 0.4236 | 0.621  | 0.3938 | 0.5165 | -0.227 | -0.188 | -0.198 |
| PCHAS_122560 | -0.098 | -1.43  | -1.216 | -0.861 | -0.414 | 0.7266 | 0.4376 | 1.0439 | 0.6995 | 0.4198 | 0.356  | 1.0651 |
| PCHAS_145690 | 0.1411 | -0.132 | -0.127 | -0.196 | -0.08  | 0.136  | -0.204 | 0.1012 | 0.1956 | 0.5602 | 0.0431 | 0.2847 |
| PCHAS_124050 | -0.182 | -0.395 | -0.067 | 0.4563 | -0.143 | -5E-04 | -0.259 | -0.324 | -0.371 | -0.042 | 1.6101 | 0.4623 |
| PCHAS_062390 | -0.255 | 0.3031 | 0.272  | 0.3947 | 0.2891 | 0.0896 | -0.324 | 0.0483 | 0.1669 | -0.283 | -1.293 | -0.288 |
| PCHAS_071600 | -0.78  | -0.623 | -0.653 | -0.611 | -0.632 | 0.1344 | 0.49   | 0.5718 | -0.076 | 0.5006 | 0.6333 | 0.1095 |
| PCHAS_135580 | 0.1704 | 0.1301 | 0.6923 | -0.333 | 0.2704 | -0.284 | 0.6346 | -0.545 | -0.364 | -0.482 | 0.0423 | -0.335 |
| PCHAS_130080 | -0.173 | 0.0498 | -0.306 | -0.022 | -0.384 | 0.2864 | -0.034 | 0.1156 | 0.2963 | 0.21   | 0.6615 | 0.6122 |
| PCHAS_040740 | -0.524 | 0.0385 | 0.0362 | 0.1993 | 0.1851 | 0.0261 | 0.2972 | -0.123 | 0.0999 | -0.966 | -0.364 | -0.803 |
| PCHAS_060490 | 0.0486 | -0.126 | 0.2349 | 0.2077 | 0.1295 | 0.0038 | -0.09  | 0.0305 | -0.035 | -0.567 | -0.473 | -0.551 |
| PCHAS_124370 | -0.296 | 0.2682 | -0.053 | 0.0175 | 0.1163 | 0.1248 | 0.7255 | 0.2407 | 0.1994 | -0.598 | -0.083 | -0.614 |
| PCHAS_143910 | -0.715 | -0.294 | -0.156 | 0.3393 | 0.1993 | -0.11  | 0.2779 | -0.262 | -0.077 | -1.066 | -1.069 | -1.128 |
| PCHAS_136120 | -0.457 | 0.4674 | 0.7008 | 0.6215 | 0.2375 | 0.034  | 0.0232 | -0.064 | 0.1673 | -0.675 | -0.691 | -0.527 |
| PCHAS_134550 | -0.305 | 0.1032 | 0.3594 | 0.0777 | 0.2319 | 0.2122 | 0.1441 | 0.4282 | 0.0859 | 0.1803 | -0.063 | 0.0703 |
| PCHAS_113970 | 0.1652 | 0.2947 | 0.1406 | 0.0405 | -0.055 | 0.1324 | -0.511 | -0.334 | 0.0337 | -0.33  | -0.545 | -0.179 |
| PCHAS_081680 | 0.0193 | 0.1841 | 0.2842 | 0.332  | -0.038 | 0.3218 | -0.322 | -0.173 | -0.148 | -0.43  | 0.0509 | -0.38  |
| PCHAS_135830 | 1.152  | 0.5543 | 0.5422 | 0.3002 | 0.0854 | -0.578 | -0.62  | -0.996 | -0.692 | -2.092 | -0.867 | -1.299 |

|              |        |        |        |        |        |        |        |        |        |        |        |        |
|--------------|--------|--------|--------|--------|--------|--------|--------|--------|--------|--------|--------|--------|
| PCHAS_061390 | -0.589 | -0.287 | -0.105 | -0.353 | 0.0091 | 0.3779 | 0.0503 | 0.1849 | 0.0073 | 0.5837 | 0.3925 | 0.562  |
| PCHAS_112880 | 0.5358 | 0.1184 | 0.8315 | -0.063 | 0.0017 | -0.242 | 0.5007 | -0.281 | -0.505 | -0.452 | 0.548  | -0.226 |
| PCHAS_020850 | -0.496 | -0.615 | -0.674 | -0.599 | -0.137 | 0.471  | -0.285 | 0.3964 | 0.1385 | 1.1954 | 1.2272 | 1.4536 |
| PCHAS_021120 | -0.343 | -0.525 | -0.425 | -0.975 | -0.193 | -0.072 | -0.75  | -0.496 | -0.224 | 1.3622 | 1.3057 | 1.0613 |
| PCHAS_120840 | -0.202 | -0.377 | -0.237 | -0.301 | -0.159 | -0.281 | 0.4116 | 0.3731 | -0.371 | -0.387 | 0.4413 | -0.514 |
| PCHAS_145020 | 0.6713 | 0.3121 | 0.8198 | 0.3262 | 0.1931 | 0.2227 | 0.1071 | 0.0124 | 0.4152 | -0.47  | 0.1188 | 0.0653 |
| PCHAS_132140 | 0.1495 | 0.167  | 0.3744 | 0.1925 | 0.1005 | -0.214 | 0.044  | -0.443 | -0.265 | -0.713 | -0.734 | -0.541 |
| PCHAS_123840 | 0.0431 | 0.3269 | 0.6272 | -0.018 | -0.044 | -0.346 | -0.1   | 0.0342 | -0.11  | 0.0285 | 0.1211 | -0.119 |
| PCHAS_011260 | 0.4976 | 0.3439 | 0.5075 | -0.242 | -0.279 | -0.347 | -0.314 | -0.38  | -0.146 | -0.605 | -0.191 | 0.246  |
| PCHAS_072370 | -0.472 | -1.144 | -0.472 | -0.493 | -0.086 | 0.3186 | 0.208  | 0.4542 | 0.4031 | 1.0785 | 1.2587 | 1.0525 |
| PCHAS_130320 | -0.773 | 0.088  | 0.3262 | 0.423  | 0.145  | 0.3779 | 0.1665 | 0.5827 | 0.4729 | -0.289 | -0.282 | -0.462 |
| PCHAS_031830 | 0.8355 | 0.6122 | 0.5998 | -0.149 | -0.19  | -0.808 | -1.995 | -1.39  | -1.042 | -1.807 | -0.915 | -0.55  |
| PCHAS_062330 | 0.4709 | -0.386 | 0.2284 | -0.144 | 0.0166 | -0.255 | 0.2323 | 0.4736 | 0.1179 | -0.473 | 0.198  | -0.363 |
| PCHAS_031280 | 0.052  | -0.196 | 0.5612 | 0.0295 | 0.2147 | -0.012 | 0.085  | 0.3428 | -0.227 | -0.59  | -0.008 | 0.491  |
| PCHAS_092490 | -0.865 | -1.103 | -0.631 | -0.708 | -0.25  | 0.1405 | 0.6119 | 0.8563 | -0.14  | 1.1587 | 0.7048 | 0.6886 |
| PCHAS_091770 | -0.403 | 0.0995 | 0.1311 | 0.3874 | 0.2192 | -0.017 | 0.1024 | -0.076 | 0.099  | -0.716 | -0.788 | -0.666 |
| PCHAS_010680 | -0.559 | -0.02  | 0.1568 | -0.064 | 0.238  | -0.027 | -0.368 | 0.0241 | 0.0418 | -0.498 | 0.1017 | -0.455 |
| PCHAS_123240 | 0.2828 | 0.193  | -0.296 | 0.5585 | -0.177 | 0.3975 | 0.5534 | 0.0242 | 0.1976 | -0.263 | 0.5874 | -0.197 |
| PCHAS_100750 | -0.154 | 0.5368 | 0.3625 | 0.6221 | 0.0814 | 0.3374 | 0.3919 | 0.2584 | 0.3316 | 0.1049 | -0.137 | 0.0992 |
| PCHAS_121840 | -0.638 | -0.528 | -0.632 | -0.222 | -0.198 | 0.0071 | 0.5038 | 0.622  | 0.1518 | 0.0611 | 0.1721 | -0.23  |
| PCHAS_132350 | 0.0709 | -0.586 | -0.295 | -0.28  | 0.0902 | 0.6005 | 0.4254 | 0.6987 | 0.6235 | 0.6188 | -0.52  | 0.3312 |
| PCHAS_061510 | -0.386 | -0.045 | 0.2441 | 0.3085 | 0.0809 | -0.154 | 0.7394 | 0.0468 | -0.117 | -0.09  | -0.439 | -0.364 |
| PCHAS_145930 | -0.372 | -0.408 | -0.405 | -0.94  | -0.363 | -0.067 | -0.342 | -0.043 | -0.084 | 1.7712 | 1.8443 | 1.3802 |
| PCHAS_010660 | -0.559 | -0.016 | 0.3542 | -0.067 | -0.009 | 0.2059 | 0.5497 | 0.261  | -0.017 | 0.0734 | 0.671  | 0.0357 |
| PCHAS_110260 | 0.3297 | -0.842 | -0.739 | 0.0788 | -0.423 | 0.6718 | 0.8629 | -0.002 | 0.6506 | -0.152 | 0.3716 | 0.0582 |
| PCHAS_093490 | -0.966 | -0.702 | 0.3566 | 0.8287 | 0.1777 | 0.0538 | -0.628 | -0.357 | -0.337 | -0.971 | -0.977 | -0.678 |
| PCHAS_135050 | -0.362 | -0.548 | -0.973 | -0.545 | -0.446 | 0.1104 | -0.475 | -0.564 | -0.179 | 1.0551 | 2.4697 | 1.2397 |
| PCHAS_090610 | 0.4739 | -0.246 | 0.4987 | 0.1133 | 0.0223 | -0.07  | 0.7684 | -0.084 | -0.563 | -0.057 | 0.3194 | 0.3071 |
| PCHAS_101870 | 0.397  | 0.3758 | 0.2955 | 0.4945 | 0.1311 | 0.2602 | -0.143 | -0.064 | 0.0881 | -0.803 | -0.655 | -0.586 |
| PCHAS_082210 | 0.0694 | 0.3275 | 0.6173 | 0.1655 | 0.2276 | 0.0425 | 0.2907 | 0.0336 | 0.0566 | -0.922 | -0.068 | -0.643 |
| PCHAS_081220 | 0.4458 | 0.2571 | -0.174 | -0.633 | 0.3986 | -0.884 | -0.656 | -0.416 | -0.717 | 0.776  | 1.6567 | 0.503  |
| PCHAS_071960 | 0.0493 | 0.2129 | 0.3787 | -0.321 | -0.05  | -0.623 | -0.331 | -0.482 | -0.671 | 0.3448 | -0.381 | -0.049 |
| PCHAS_141420 | 0.6723 | 0.1674 | 0.281  | -0.113 | 0.2109 | -0.241 | 0.0863 | 0.3953 | -0.166 | -0.196 | -1.523 | -0.112 |
| PCHAS_101930 | -0.087 | 0.273  | 0.5262 | 0.189  | 0.3076 | -0.332 | -0.11  | -0.43  | -0.586 | -1.088 | -0.298 | -0.566 |
| PCHAS_104050 | -1.088 | -0.887 | -0.382 | -0.458 | -0.12  | -0.002 | 0.3022 | 0.4665 | 0.076  | 0.4721 | 0.419  | 0.1787 |
| PCHAS_050460 | -0.218 | -0.638 | -1.146 | -0.192 | -0.216 | 0.2314 | 0.2907 | 0.5276 | -0.007 | 0.1549 | 0.2772 | -0.08  |
| PCHAS_133310 | 0.0224 | 0.1411 | 0.4015 | 0.2108 | 0.0712 | -0.168 | -0.308 | -0.107 | -0.233 | -0.587 | -0.491 | -0.588 |
| PCHAS_041480 | -0.278 | 0.1249 | 0.1216 | 0.3378 | 0.3723 | 0.4214 | 0.5571 | 0.0898 | 0.0022 | -0.187 | -0.585 | -0.147 |
| PCHAS_141200 | 0.4168 | 0.0452 | -0.023 | -0.048 | -0.046 | -0.159 | -0.217 | -0.32  | -0.27  | 0.0967 | 0.1987 | 0.3541 |
| PCHAS_145760 | 1.3066 | 0.2639 | -1.702 | 0.3456 | -0.94  | -0.318 | 0.4918 | -0.224 | 0.3552 | -0.303 | -0.018 | -0.02  |
| PCHAS_010140 | 0.2992 | 0.3653 | -0.162 | 0.8657 | -0.221 | -0.331 | -0.33  | -0.585 | -0.238 | -0.207 | 0.0165 | -0.309 |
| PCHAS_131240 | 0.5626 | 0.3857 | 0.0254 | 0.1698 | 0.0424 | 0.1374 | -0.028 | -0.515 | 0.0764 | -0.315 | -0.092 | -0.307 |
| PCHAS_080910 | 0.3272 | 0.8267 | 0.6298 | 0.3944 | 0.0989 | 0.4191 | 0.0598 | 0.1212 | 0.2013 | -0.621 | 0.1387 | -0.509 |
| PCHAS_131480 | 0.383  | 0.1334 | 0.0771 | -0.243 | -0.167 | -0.264 | 0.3575 | 0.4932 | -0.173 | 0.1775 | 0.5953 | 0.0118 |
| PCHAS_141010 | 0.6149 | 0.6331 | 0.5496 | 0.3881 | 0.1743 | -0.196 | -0.274 | -0.168 | -0.232 | -0.986 | -1.38  | -0.588 |
| PCHAS_134760 | 1.1342 | 1.4222 | 0.6026 | 0.3032 | 0.0777 | 1.2178 | -0.16  | -0.315 | 0.4619 | -0.83  | 0.2562 | -0.224 |
| PCHAS_135530 | 0.3797 | 0.3576 | 0.3811 | 0.249  | 0.1176 | -0.17  | -0.191 | -0.183 | -0.232 | -0.913 | -0.673 | -0.725 |
| PCHAS_143520 | 0.7724 | 0.5886 | 1.2563 | 0.032  | 0.045  | 0.414  | 0.5721 | 0.0655 | -0.084 | -0.323 | 0.2976 | 0.0524 |
| PCHAS_080360 | -0.17  | 0.5167 | 0.6422 | 0.8259 | 0.2979 | -0.365 | -0.631 | -1.024 | -0.402 | -2.51  | -3.215 | -1.568 |
| PCHAS_060620 | -0.507 | -0.308 | 0.1786 | -0.206 | -0.088 | 0.7437 | 0.4415 | 0.7919 | 0.1524 | 0.4456 | 0.6761 | 0.3018 |

|              |        |        |        |        |        |        |        |        |        |        |        |        |
|--------------|--------|--------|--------|--------|--------|--------|--------|--------|--------|--------|--------|--------|
| PCHAS_145950 | -0.025 | -0.31  | -1.001 | -0.223 | -0.104 | 0.4113 | -0.263 | -0.272 | 0.3817 | 1.5982 | 0.8172 | 1.3813 |
| PCHAS_103630 | -0.73  | -0.922 | -0.616 | -0.363 | 0.0736 | 0.3203 | 1.2443 | 0.8265 | 0.2655 | 0.2253 | 0.6121 | 0.031  |
| PCHAS_070290 | -1     | -0.834 | -0.31  | -0.467 | 0.1956 | -0.001 | 0.5112 | 0.706  | 0.1869 | 0.738  | 0.6922 | 0.5717 |
| PCHAS_020840 | -0.219 | -0.287 | 0.0335 | 0.0047 | -0.196 | 0.0449 | 0.6368 | 0.7636 | -0.01  | -0.115 | -0.678 | -0.015 |
| PCHAS_121360 | 0.0688 | 0.5077 | 0.9312 | 0.3083 | 0.0007 | -0.249 | -0.365 | -0.29  | -0.204 | -0.542 | -0.51  | -0.354 |
| PCHAS_080430 | -0.105 | 0.0427 | 0.2258 | -0.111 | 0.0041 | -0.124 | -0.209 | -0.165 | -0.181 | -0.495 | -0.356 | -0.338 |
| PCHAS_072600 | 0.1638 | -0.942 | -0.912 | -1.464 | -0.815 | -0.32  | -0.384 | -0.588 | -0.258 | 1.6807 | 2.2796 | 1.636  |
| PCHAS_134940 | 0.8588 | 0.6181 | 0.5629 | 0.1993 | 0.0475 | 0.349  | -0.197 | 0.029  | 0.0309 | -0.437 | 0.1878 | 0.1879 |
| PCHAS_123960 | 0.4563 | 0.0432 | 0.4273 | -0.233 | -0.196 | -0.138 | 0.4282 | -0.162 | -0.183 | -0.831 | -0.168 | -0.956 |
| PCHAS_072440 | -0.363 | -1.008 | -0.474 | -1.103 | -0.077 | 0.2897 | 0.9431 | 0.4102 | 0.259  | 1.1267 | 0.8431 | 0.9527 |
| PCHAS_082020 | -0.141 | 0.0865 | 0.4128 | 0.0581 | 0.085  | -0.081 | 0.5367 | 0.0247 | -0.106 | -0.228 | -0.045 | -0.352 |
| PCHAS_031260 | 0.045  | 0.1833 | 0.5318 | 0.2282 | 0.0448 | 0.0806 | -0.27  | 0.2547 | 0.2291 | 0.5342 | 0.1744 | 0.3488 |
| PCHAS_030460 | 0.6369 | 0.5383 | 0.4753 | 0.7462 | 0.2774 | -0.296 | -0.248 | -0.502 | -0.251 | -1.182 | -0.807 | -0.735 |
| PCHAS_133170 | -0.726 | 0.185  | 0.4113 | 0.1903 | 0.2798 | -0.153 | 0.4316 | 0.0925 | -0.04  | -1.075 | -0.596 | -0.429 |
| PCHAS_113390 | 0.0785 | -0.117 | -0.271 | 0.1117 | -0.166 | -0.06  | -0.35  | 0.0334 | -0.13  | 0.2167 | 0.2801 | 0.0822 |
| PCHAS_130960 | 0.1516 | 0.1611 | 0.1781 | 0.2842 | -0.04  | 0.1093 | 0.4355 | -0.159 | 0.0143 | -0.455 | -1.263 | -0.435 |
| PCHAS_101610 | -0.507 | 0.1636 | 0.6489 | 0.4318 | 0.2151 | -0.259 | 0.3484 | 0.0635 | -0.25  | -0.616 | -1.4   | -0.542 |
| PCHAS_132920 | -0.441 | 0.1864 | 0.2308 | -0.136 | 0.0423 | -0.159 | 0.2586 | 0.3729 | -0.189 | 0.3155 | 0.3695 | 0.0871 |
| PCHAS_041900 | -0.53  | -0.851 | -0.946 | -0.604 | -0.133 | 0.764  | -0.033 | 0.6079 | 0.5908 | 0.666  | -0.308 | 0.5093 |
| PCHAS_041530 | 0.176  | -0.481 | 0.2385 | -0.474 | -0.058 | -0.328 | 1.2616 | 0.3661 | -0.235 | 0.3754 | 0.682  | 0.0642 |
| PCHAS_135790 | -0.302 | -0.256 | 0.2062 | -0.116 | -0.048 | 0.0959 | 0.9565 | -0.26  | 0.1596 | -0.288 | -0.341 | -0.479 |
| PCHAS_061960 | 0.0617 | 0.5548 | 0.3642 | 0.2405 | 0.1121 | 0.1497 | -0.13  | -0.363 | 0.046  | -0.506 | -0.04  | -0.518 |
| PCHAS_132020 | -0.124 | 0.009  | -0.029 | -0.031 | -0.253 | 0.1791 | 0.0247 | 0.0385 | 0.1945 | 0.45   | -0.058 | 0.1751 |
| PCHAS_070220 | -0.51  | -0.2   | -0.495 | -0.992 | -0.614 | 0.518  | 0.0372 | 0.1869 | 0.2684 | 0.5676 | 1.6325 | 0.0717 |
| PCHAS_142440 | -0.64  | -0.024 | 0.0812 | 0.2151 | 0.1474 | 0.0266 | 0.1203 | 0.0491 | 0.0973 | -1.343 | -0.279 | -0.618 |
| PCHAS_090600 | -0.133 | -0.617 | -0.402 | -0.387 | 0.2722 | 0.2542 | 0.7009 | 0.4176 | 0.4537 | 0.378  | -0.097 | 0.244  |
| PCHAS_113520 | 0.145  | -0.005 | -0.733 | 0.0636 | -0.407 | 0.2243 | 0.3648 | -5E-04 | 0.4731 | -0.145 | -0.15  | -0.041 |
| PCHAS_020700 | 0.1104 | -0.337 | 0.9023 | 0.0041 | 0.1987 | 0.0089 | 0.5654 | -0.017 | -0.087 | -2.201 | -0.681 | -0.979 |
| PCHAS_122900 | -0.094 | 0.0107 | -0.007 | -0.161 | -0.057 | -0.172 | 0.0122 | 0.1113 | -0.174 | 0.1467 | 0.5813 | 0.2337 |
| PCHAS_050690 | 1.0931 | 0.6788 | 0.758  | 0.3735 | -0.019 | -0.17  | -0.994 | -0.946 | -0.296 | -1.01  | -0.988 | -0.817 |
| PCHAS_102050 | 0.3053 | 0.4687 | 0.3421 | 0.6145 | 0.0756 | -0.001 | -0.085 | -0.481 | -0.01  | -1.146 | -1.13  | -0.667 |
| PCHAS_131820 | 0.676  | 0.5763 | 0.4395 | 0.1838 | -0.114 | -0.546 | -1.611 | -1.426 | -0.705 | -1.374 | -0.21  | -0.592 |
| PCHAS_100600 | -0.177 | -0.127 | -0.012 | 0.1916 | 0.0181 | -0.33  | -0.2   | -0.188 | -0.334 | -0.852 | -0.201 | -0.585 |
| PCHAS_122330 | 0.4683 | 0.3723 | 0.7378 | -0.004 | -0.038 | -0.081 | 0.4082 | -0.022 | -0.068 | 0.4948 | 0.1582 | -0.009 |
| PCHAS_133670 | 0.9559 | 0.988  | 0.4178 | 0.6496 | 0.4162 | 0.8341 | -0.008 | -0.142 | 0.9469 | -0.839 | -0.907 | -0.499 |
| PCHAS_081600 | 0.0022 | 0.3387 | 0.4497 | 0.3355 | 0.1857 | 0.5192 | 0.1632 | -0.175 | 0.1813 | -0.49  | -0.009 | -0.212 |
| PCHAS_111360 | 0.3124 | -0.63  | -1.01  | -0.819 | -0.219 | -0.208 | 0.0004 | -0.115 | -0.113 | 0.4073 | 0.6381 | 0.4428 |
| PCHAS_092630 | -0.289 | 0.456  | 0.181  | 0.144  | 0.3468 | 0.5464 | 0.5104 | 1.0684 | 0.2348 | 0.721  | 1.0302 | 0.4091 |
| PCHAS_112930 | -0.338 | -0.641 | -0.175 | -0.372 | -0.134 | 0.0344 | -0.814 | -0.02  | -0.178 | 0.5236 | 0.6761 | 0.3711 |
| PCHAS_122770 | -0.127 | 0.4796 | 0.5933 | 0.5836 | 0.133  | -0.47  | -0.546 | -0.636 | -0.054 | -1.194 | -1.961 | -0.925 |
| PCHAS_051720 | 0.6586 | 0.2258 | 0.2296 | -0.375 | -0.221 | -0.154 | 0.0777 | 0.1308 | -0.336 | 0.3984 | 0.9625 | 0.2205 |
| PCHAS_021190 | 0.3448 | -0.038 | 0.1789 | 0.0227 | -0.106 | -0.576 | -0.312 | -0.746 | -0.48  | -0.458 | -0.174 | -0.421 |
| PCHAS_140230 | 0.6033 | 0.1026 | 0.0762 | -0.473 | -0.246 | -0.168 | -0.045 | 0.2414 | -0.03  | 0.2706 | 0.6316 | 0.4429 |
| PCHAS_051130 | 0.9749 | 0.7206 | 0.6904 | 0.2373 | 0.1135 | -0.192 | -0.373 | -0.75  | -0.326 | -0.994 | -0.299 | -0.24  |
| PCHAS_103600 | -0.707 | 0.0485 | 0.496  | 0.2524 | 0.1512 | 0.0525 | 0.3183 | 0.4578 | 0.2935 | 0.7063 | -0.055 | 0.697  |
| PCHAS_060630 | 0.4312 | 0.2428 | -0.012 | 0.2492 | -0.077 | 0.2599 | -0.427 | -0.233 | 0.0223 | -0.151 | -0.35  | 0.2125 |
| PCHAS_123140 | -0.116 | 0.3914 | 0.1836 | 0.1525 | 0.2676 | -0.101 | -1.029 | 0.0834 | 0.1114 | -0.37  | -1.533 | -0.675 |
| PCHAS_137020 | 1.6685 | 0.345  | -0.047 | -0.348 | -0.484 | -0.409 | 0.2055 | -0.283 | -0.232 | 0.6687 | 2.8358 | 0.7047 |
| PCHAS_103270 | 0.2174 | 0.1482 | 0.1908 | 0.4377 | -0.125 | -0.447 | -0.302 | -0.717 | -0.28  | -1.088 | -0.629 | -0.643 |
| PCHAS_082160 | -0.057 | -0.167 | -0.805 | 0.0073 | -0.3   | -0.084 | -0.142 | 0.1818 | 0.6521 | 0.0516 | 1.0665 | 0.374  |



|              |        |        |        |        |        |        |        |        |        |        |        |        |
|--------------|--------|--------|--------|--------|--------|--------|--------|--------|--------|--------|--------|--------|
| PCHAS_091800 | 0.1984 | 0.1013 | 0.3923 | 0.0324 | -0.078 | -0.536 | 0.0343 | -0.257 | -0.457 | -1.05  | -0.154 | -0.855 |
| PCHAS_090840 | 0.3318 | 0.2391 | 0.6961 | 0.4082 | 0.1494 | -0.205 | 0.2276 | 0.4394 | -0.355 | -0.395 | 0.3162 | -0.356 |
| PCHAS_061020 | -0.697 | 0.1913 | 0.8447 | 0.2241 | -0.491 | -0.235 | -0.031 | 0.0806 | -0.151 | -0.045 | -0.135 | -0.203 |
| PCHAS_134230 | 0.1436 | 0.0164 | 0.2608 | 0.2622 | -0.091 | 0.2792 | -0.247 | -0.09  | 0.2449 | 0.1364 | -0.496 | -0.138 |
| PCHAS_120930 | 0.5073 | 0.5552 | 0.4634 | 0.4832 | 0.2132 | -0.564 | -0.593 | -1.185 | -0.549 | -1.665 | -0.997 | -1.205 |
| PCHAS_090250 | -0.73  | -1.179 | -1.091 | -0.977 | -0.199 | 0.4887 | 0.0575 | -0.041 | 0.5987 | 0.7921 | 0.4741 | 0.5949 |
| PCHAS_052080 | -0.118 | -0.138 | 0.1277 | -0.031 | 0.1183 | -0.035 | 0.3741 | 0.1165 | 0.005  | -0.486 | -0.178 | -0.481 |
| PCHAS_040350 | -0.062 | -0.501 | -0.028 | -0.183 | -0.184 | -0.272 | 0.0241 | -0.047 | -0.254 | -1.094 | -0.705 | -0.011 |
| PCHAS_083500 | 1.2519 | 1.9137 | -0.122 | 1.0671 | -0.132 | 2.114  | 0.4204 | -0.376 | 1.6453 | -0.171 | 0.3853 | 0.885  |
| PCHAS_040370 | -0.228 | -0.244 | -0.034 | -0.24  | -0.219 | 0.0075 | -0.34  | -0.093 | -0.098 | 0.3103 | 0.2719 | 0.1387 |
| PCHAS_145720 | 0.022  | -0.184 | -0.352 | -0.306 | 0.0323 | -0.03  | -0.308 | 0.6945 | -0.015 | 1.1105 | 0.4323 | 0.6162 |
| PCHAS_121120 | -0.904 | -1.639 | 0.7152 | 0.2374 | 0.4447 | -0.18  | 1.5276 | -0.687 | -0.184 | -1.613 | -0.524 | -0.845 |
| PCHAS_136920 | -0.051 | -0.185 | 0.0973 | -0.123 | 0.0698 | 0.7565 | -0.228 | -0.138 | 0.063  | 0.5468 | 0.6399 | 0.676  |
| PCHAS_050530 | -1.073 | -0.787 | -0.053 | -0.349 | 0.2558 | 0.1088 | 1.339  | 0.9619 | 0.0518 | 0.6371 | 0.5644 | 0.233  |
| PCHAS_134610 | 0.2564 | 0.071  | -0.313 | -0.089 | -0.173 | -0.194 | 0.2408 | -0.075 | 0.0168 | -0.604 | -0.161 | -0.436 |
| PCHAS_071650 | 0.0217 | 0.4065 | 0.5512 | -0.111 | 0.07   | -0.063 | -0.149 | 0.1735 | -0.16  | -0.913 | 0.7141 | -0.044 |
| PCHAS_092520 | 1.5655 | 0.9345 | 0.9743 | 0.3337 | -0.042 | 0.3383 | -0.078 | -0.229 | 0.1351 | -0.709 | 1.0768 | -0.076 |
| PCHAS_020830 | 0.4168 | -0.293 | 0.2459 | -0.314 | -0.186 | -0.817 | 0.3592 | 0.1279 | -0.81  | -0.083 | 0.004  | -0.293 |
| PCHAS_142770 | -0.132 | -0.35  | 0.2359 | -0.585 | -0.047 | -0.148 | -0.107 | 0.2383 | 0.0364 | 0.7774 | 1.4223 | 0.4541 |
| PCHAS_081040 | 0.2936 | 0.6012 | 0.3112 | 0.5678 | 0.1001 | -0.191 | 0.2054 | -0.385 | -0.335 | -0.157 | -0.389 | 0.0459 |
| PCHAS_142650 | -0.159 | 0.5045 | 0.7778 | -0.139 | 0.0531 | -0.022 | 0.6201 | 0.3723 | -0.376 | -0.342 | 0.3373 | -0.299 |
| PCHAS_061710 | -0.274 | 0.3571 | 0.0278 | 0.2043 | 0.2095 | -0.036 | 0.0592 | -0.039 | -0.025 | -0.784 | -0.45  | 0.0043 |
| PCHAS_114250 | -0.267 | 0.0213 | 0.1267 | 0.107  | 0.2966 | -0.026 | 0.0022 | -0.548 | -0.093 | -0.762 | -0.888 | -0.63  |
| PCHAS_130350 | 0.3295 | 0.1637 | 0.1273 | -0.097 | -0.249 | 0.3767 | 0.2375 | 0.2036 | 0.367  | 0.0132 | 0.4555 | 0.0869 |
| PCHAS_145460 | 0.5857 | -0.322 | 0.5187 | 0.0056 | 0.2754 | -0.416 | 0.3642 | -0.322 | -0.231 | -0.541 | 0.2831 | -0.615 |
| PCHAS_061350 | 0.3161 | 0.0507 | -0.197 | 0.1979 | -0.31  | -0.102 | -0.54  | -0.163 | -0.204 | -0.294 | -0.316 | -0.07  |
| PCHAS_041090 | -0.251 | -0.151 | 0.1505 | 0.2366 | -0.008 | 0.193  | 0.9156 | 0.6583 | 0.2254 | -0.285 | 0.3101 | -0.347 |
| PCHAS_122700 | 0.2752 | 0.1956 | 0.284  | 0.2816 | 0.2095 | -0.013 | -0.274 | -0.121 | 0.1118 | -1.389 | -1.172 | -0.992 |
| PCHAS_146570 | 0.1176 | 0.5363 | 0.376  | 0.1783 | 0.2274 | 0.2617 | 0.4317 | 0.0422 | -0.016 | -0.285 | 0.2927 | -0.334 |
| PCHAS_100240 | 0.0937 | -0.123 | -0.501 | -0.377 | -0.129 | 0.4352 | -0.074 | -0.364 | 0.0213 | 0.9737 | 1.7323 | 0.8173 |
| PCHAS_123480 | 0.0793 | 0.0317 | 0.4392 | 0.0102 | 0.0323 | -0.27  | 0.2562 | -0.115 | -0.338 | -0.408 | -0.098 | -0.896 |
| PCHAS_081540 | 1.0928 | 0.2927 | 0.0077 | -0.276 | -0.046 | -0.091 | -0.35  | 0.0725 | -0.046 | 0.6688 | 1.3934 | 0.7134 |
| PCHAS_114240 | -1.016 | -0.639 | -0.114 | -0.231 | 0.1045 | -0.096 | 0.1863 | 0.5662 | -0.097 | -0.341 | 0.1359 | -0.535 |
| PCHAS_140810 | 0.8594 | 0.3018 | 0.2964 | 0.2537 | 0.1264 | -0.284 | -0.725 | -0.498 | -0.372 | -0.239 | -0.312 | -0.28  |
| PCHAS_052330 | 0.1022 | 0.1824 | 0.1078 | -0.084 | -0.093 | -0.118 | 0.5089 | -0.054 | -0.224 | -0.335 | -0.304 | -0.456 |
| PCHAS_093510 | 0.1123 | 0.4508 | 0.3968 | 0.1462 | 0.044  | -0.084 | 0.7312 | 0.4591 | 0.0864 | 0.3116 | 0.5807 | 0.7463 |
| PCHAS_113150 | 0.4387 | 0.6432 | 0.3823 | 0.3844 | 0.1076 | -0.002 | 0.1303 | 0.1138 | 0.1352 | 0.1235 | 0.1406 | 0.058  |
| PCHAS_082780 | -0.1   | -0.067 | -0.236 | -0.175 | 0.1462 | -0.172 | 0.7275 | 0.7348 | 0.0457 | 0.3968 | -0.163 | 0.2373 |
| PCHAS_114150 | 0.0998 | 0.2903 | 0.1529 | 0.3593 | 0.1548 | -0.374 | 0.2431 | -0.388 | -0.356 | -0.742 | -0.197 | -0.529 |
| PCHAS_135280 | 0.004  | 0.3278 | -0.473 | 0.4935 | -0.414 | 0.4717 | -0.281 | -0.31  | 0.3175 | -0.548 | -0.224 | -0.227 |
| PCHAS_083110 | -0.146 | -0.264 | -0.739 | 0.1332 | -0.099 | 1.0616 | 0.0771 | 0.1076 | 0.5249 | 0.012  | 1.128  | 0.6195 |
| PCHAS_142710 | -0.476 | -0.271 | 0.3275 | 0.07   | 0.1326 | -0.11  | 0.375  | 0.1614 | 0.0847 | -0.286 | -0.256 | -0.196 |
| PCHAS_112160 | -0.082 | 0.3537 | 0.4684 | 0.2278 | 0.1311 | -0.005 | 0.4146 | -0.015 | -0.122 | -0.304 | -0.268 | 0.0299 |
| PCHAS_123400 | -0.068 | -0.126 | 0.1779 | 0.4813 | 0.2115 | 0.0803 | -0.237 | -0.321 | 0.0603 | -1.138 | -1.038 | -0.639 |
| PCHAS_071120 | 0.1639 | 0.1693 | 0.2805 | 0.3464 | 0.0973 | 0.088  | -0.533 | -0.14  | 0.0981 | -0.223 | -0.79  | -0.262 |
| PCHAS_130820 | 0.1784 | 0.8858 | -0.311 | 0.7989 | 0.0704 | -0.16  | -0.246 | -0.32  | -0.426 | -0.782 | -0.544 | -0.264 |
| PCHAS_110730 | -0.028 | -1.022 | -1.002 | -0.467 | -0.256 | 0.4997 | -0.319 | 0.4525 | 0.3138 | 2.3265 | 2.189  | 1.8386 |
| PCHAS_093640 | -5E-04 | 0.0669 | 0.2437 | 0.1769 | 0.2944 | -0.168 | -0.168 | -0.145 | -0.093 | -0.72  | -0.599 | -0.484 |
| PCHAS_144210 | 0.303  | 0.4685 | 0.2751 | -0.393 | -0.25  | -0.099 | -0.608 | -0.566 | -0.275 | -0.196 | -0.178 | -0.202 |
| PCHAS_080080 | -0.439 | -1.313 | -0.108 | -0.287 | -0.1   | -0.161 | 1.3567 | 0.0356 | 0.2728 | -0.498 | -0.494 | -0.65  |

|              |        |        |        |        |        |        |        |        |        |        |        |        |
|--------------|--------|--------|--------|--------|--------|--------|--------|--------|--------|--------|--------|--------|
| PCHAS_130610 | -1.657 | -1.287 | -1.523 | -0.582 | 0.0684 | 0.263  | 0.7584 | 0.9688 | 0.6555 | 0.427  | 0.0858 | 0.0423 |
| PCHAS_112140 | 0.1696 | 0.0289 | -0.045 | -0.275 | -0.136 | -0.011 | -0.242 | -0.283 | -0.033 | 0.272  | 1.1183 | 0.6903 |
| PCHAS_020480 | 0.6723 | 0.1132 | 0.6798 | 0.2815 | 0.2709 | 0.5573 | -0.247 | -0.101 | 0.4553 | 0.3833 | -0.108 | 0.4526 |
| PCHAS_140940 | -0.025 | 0.893  | 0.8575 | 0.3184 | -0.002 | -0.213 | -0.567 | -0.094 | -0.089 | -0.52  | -0.115 | 0.0353 |
| PCHAS_061720 | 0.1744 | 0.1847 | 0.5423 | 0.3406 | 0.1894 | -0.242 | -0.077 | -0.222 | -0.174 | -0.708 | -1.085 | -0.835 |
| PCHAS_142470 | 0.072  | -0.098 | 0.413  | 0.0522 | 0.0271 | 0.0028 | -0.059 | 0.2888 | 0.1523 | -0.032 | 0.4453 | 0.159  |
| PCHAS_070940 | 0.13   | -0.169 | 0.0858 | 0.0306 | 0.081  | 0.2106 | 0.6578 | 0.4895 | 0.1985 | 0.2384 | 0.029  | 0.404  |
| PCHAS_102700 | 2.0998 | 0.5069 | -1.782 | 0.4579 | -0.568 | 0.8482 | 1.6221 | 0.293  | 0.228  | 0.037  | -0.063 | -0.002 |
| PCHAS_144290 | 0.2953 | 0.8047 | 0.774  | 0.2109 | -0.059 | 0.5591 | 0.0947 | -0.162 | -0.102 | -0.968 | -2.688 | -0.589 |
| PCHAS_031700 | 0.4987 | -0.093 | 0.2424 | 0.0234 | 0.2536 | 0.0365 | 0.0991 | -0.124 | -0.09  | 0.3525 | 0.6803 | 0.2948 |
| PCHAS_093380 | -0.102 | -0.554 | -0.311 | 0.062  | -0.015 | 0.2618 | 0.2375 | 0.5502 | 0.3175 | 1.0059 | 0.4243 | 0.3463 |
| PCHAS_140180 | -0.023 | -0.733 | -0.655 | -0.946 | -0.353 | 0.0234 | -0.236 | -0.431 | -0.009 | 0.8665 | 0.8702 | 1.0104 |
| PCHAS_112520 | -0.711 | -0.011 | 0.4643 | 0.2403 | 0.2674 | -0.211 | 1.3255 | 0.0546 | 0.0391 | -1.259 | -1.021 | -0.658 |
| PCHAS_122680 | -1.05  | -0.609 | -0.319 | -0.006 | 0.1889 | 0.1738 | 0.6324 | 0.4512 | 0.3033 | -0.112 | -0.316 | -0.209 |
| PCHAS_083210 | -0.035 | 0.5796 | -0.481 | 0.5161 | -0.975 | -0.679 | -0.514 | 0.0173 | -0.37  | -0.112 | 0.1043 | -0.117 |
| PCHAS_083700 | -0.392 | -0.759 | -0.946 | -0.85  | -0.46  | 0.6906 | 1.0149 | 0.1922 | 0.2032 | 2.24   | 2.0739 | 1.7877 |
| PCHAS_092570 | 1.2661 | 0.2698 | 0.3166 | 0.0351 | -0.223 | -0.135 | -0.026 | -0.075 | -0.209 | -0.099 | 0.9029 | -0.33  |
| PCHAS_121500 | -0.258 | 0.451  | -0.444 | 0.5351 | -0.027 | -0.122 | 0.0924 | -0.302 | 0.3408 | -0.521 | -0.252 | -0.399 |
| PCHAS_110270 | 0.1681 | 0.2622 | 0.059  | 0.5014 | 0.2535 | 0.0195 | 0.1552 | -0.428 | -0.215 | -1.158 | -0.941 | -0.904 |
| PCHAS_110480 | 0.8629 | -0.299 | -1.12  | -0.172 | -0.534 | 0.1749 | 1.038  | 0.6773 | 0.3375 | 0.2811 | 0.0773 | 0.413  |
| PCHAS_082030 | -1.521 | -0.978 | -0.746 | -0.653 | -0.018 | 0.3031 | 0.962  | 0.7329 | 0.2729 | 0.3002 | -0.013 | 0.2145 |
| PCHAS_080670 | -0.138 | -0.035 | -0.029 | 0.2283 | 0.0345 | -0.002 | 0.0996 | 0.0109 | 0.11   | -1.151 | -0.776 | -0.594 |
| PCHAS_132060 | 0.1641 | 0.3076 | 0.4994 | 0.2864 | -0.056 | -0.135 | -0.168 | -0.615 | -0.232 | -1.084 | -1.369 | -0.609 |
| PCHAS_122470 | -0.457 | 0.3408 | 0.354  | -0.204 | -0.122 | -0.446 | 0.1985 | -0.339 | -0.428 | -0.225 | 1.1743 | -0.094 |
| PCHAS_123030 | 0.711  | 0.2848 | 0.3327 | 0.046  | 0.1402 | -0.238 | -0.224 | -0.33  | -0.382 | 0.4262 | 0.1659 | 0.458  |
| PCHAS_000970 | 0.5276 | -1.009 | -0.785 | -0.424 | -0.226 | 0.3082 | -0.362 | 0.0548 | 0.1825 | 0.9397 | 1.4472 | 0.3621 |
| PCHAS_071370 | 1.1526 | 0.4643 | 0.0901 | 0.0896 | -0.058 | 0.5964 | 0.4642 | 0.2218 | 0.3949 | 1.1936 | 1.5167 | 0.8582 |
| PCHAS_051160 | -0.124 | 0.3143 | 0.5173 | -0.184 | 0.0446 | -0.012 | 0.8798 | 0.1238 | -0.342 | -0.075 | 0.2217 | -0.138 |
| PCHAS_050200 | -0.197 | 0.0475 | -0.043 | 0.3278 | -0.064 | 0.05   | 0.1427 | 0.1392 | -0.003 | -0.345 | -0.291 | -0.225 |
| PCHAS_083130 | -0.385 | -1.544 | -1.965 | -2.254 | -0.309 | 1.0674 | -0.591 | -0.819 | 0.9715 | 1.1955 | 0.263  | 1.101  |
| PCHAS_111900 | 0.2848 | -0.081 | 0.3561 | -0.227 | -0.119 | -0.672 | -0.25  | -0.281 | -0.676 | -0.638 | -0.287 | -0.07  |
| PCHAS_131270 | 0.0858 | 0.3297 | 0.3987 | 0.3291 | 0.1247 | -0.024 | -0.382 | -0.35  | -0.045 | -1.205 | -0.729 | -0.771 |
| PCHAS_133140 | 0.9554 | 0.1836 | -0.02  | -0.517 | -0.724 | -0.241 | -0.568 | -0.181 | -0.31  | 1.3792 | 3.05   | 1.4814 |
| PCHAS_132420 | 1.1225 | -0.036 | -1.932 | 0.6521 | -0.932 | 0.6327 | 2.0303 | -0.751 | 0.3443 | 0.711  | 0.2656 | 0.1968 |
| PCHAS_051990 | 0.0837 | 0.5972 | 0.1455 | 0.059  | 0.1514 | -0.075 | 1.819  | 0.602  | 0.1398 | -0.474 | 0.0222 | -0.317 |
| PCHAS_113740 | -1.437 | -1.792 | -1.77  | -1.402 | -0.212 | 0.4734 | 1.045  | 1.1549 | 0.4386 | 0.3561 | 0.1987 | 0.2297 |
| PCHAS_141110 | 0.0312 | -0.735 | -1.082 | -1.44  | -0.743 | -0.328 | -0.665 | -0.445 | -0.412 | 1.2371 | 1.7921 | 1.2882 |
| PCHAS_120580 | 0.3116 | 0.5387 | 0.4098 | 0.386  | -0.163 | -0.312 | -1.463 | -1.4   | -0.405 | 0.2275 | -0.043 | 0.2433 |
| PCHAS_143170 | 0.6703 | 0.3732 | 0.099  | 0.0957 | 0.1518 | -0.391 | -0.585 | -0.612 | -0.22  | -0.401 | 0.6817 | -0.481 |
| PCHAS_091240 | -0.835 | -0.613 | 0.2428 | 0.1288 | 0.1026 | -0.267 | 0.3472 | -0.402 | -0.131 | 0.046  | -0.13  | -0.207 |
| PCHAS_142600 | 0.257  | 0.645  | 0.6268 | 0.2795 | -0.069 | -0.281 | -0.586 | -0.623 | -0.36  | -1.046 | -1.495 | -0.844 |
| PCHAS_144340 | -1.393 | -1.785 | -1.551 | -1.119 | -0.383 | 0.209  | 0.4598 | 1.2274 | 0.2291 | 0.5513 | 0.3897 | 0.4455 |
| PCHAS_041140 | 0.2222 | 0.2127 | 0.0049 | 0.0371 | 0.0745 | -0.012 | 0.016  | -0.272 | 0.3469 | 0.0212 | 0.1776 | 0.4994 |
| PCHAS_124360 | 0.5602 | 0.4521 | 0.4984 | 0.0826 | 0.275  | -0.329 | 0.3286 | -0.378 | -0.253 | -0.575 | 0.3588 | -0.271 |
| PCHAS_145800 | -0.323 | 0.267  | 0.4483 | -0.032 | 0.0983 | -0.491 | -0.371 | -0.362 | -0.65  | -0.734 | -0.047 | -0.565 |
| PCHAS_113660 | 0.1444 | 0.5158 | 0.5679 | -0.161 | -0.125 | -0.561 | 1.0924 | -0.726 | -0.513 | -1.328 | -1.501 | -0.994 |
| PCHAS_090570 | -0.217 | -0.071 | 0.1143 | 0.0122 | 0.2429 | 0.0556 | 1.0185 | -0.228 | 0.2281 | -1.003 | -0.581 | -0.954 |
| PCHAS_060640 | 0.3789 | 0.1827 | -0.685 | 0.1408 | -0.383 | 0.1216 | -0.01  | 0.4151 | 0.2779 | 0.7985 | 0.5776 | -0.142 |
| PCHAS_122410 | -0.294 | 0.0153 | -0.254 | 0.0836 | 0.0468 | 0.4346 | -0.131 | 0.1188 | 0.3518 | 0.4184 | 0.2843 | 0.3432 |
| PCHAS_093270 | -0.71  | -0.607 | 0.3378 | -0.07  | 0.0967 | 0.354  | 1.3301 | 0.5482 | 0.4489 | -0.011 | -0.691 | -0.041 |

|              |        |        |        |        |        |        |        |        |        |        |        |        |
|--------------|--------|--------|--------|--------|--------|--------|--------|--------|--------|--------|--------|--------|
| PCHAS_144170 | -0.202 | -0.046 | 0.2262 | 0.4518 | 0.3271 | -0.35  | 1.7319 | 0.1011 | -0.279 | -0.239 | -0.225 | 0.0005 |
| PCHAS_112340 | 1.6975 | -0.091 | 0.2217 | -0.715 | -0.28  | -1.016 | 1.5373 | 0.1528 | -0.451 | 0.1166 | 0.8165 | -0.965 |
| PCHAS_142420 | -0.42  | -0.293 | -0.236 | -0.219 | -0.341 | -0.014 | 0.1751 | 0.2349 | 0.1447 | -0.188 | -0.65  | -0.229 |
| PCHAS_061450 | 0.3609 | 0.154  | -0.346 | 0.2533 | 0.1629 | 0.0647 | 0.1438 | 0.2548 | 0.0455 | -0.048 | -0.674 | 0.0442 |
| PCHAS_020330 | 0.4482 | 0.018  | 0.1881 | 0.1399 | 0.267  | -0.16  | 0.8926 | -0.3   | -0.11  | -0.786 | 0.7578 | -0.449 |
| PCHAS_141460 | -0.295 | 0.1907 | 0.7173 | 0.2652 | 0.2587 | -0.085 | -0.128 | 0.0923 | -0.267 | -0.424 | 0.1429 | -0.491 |
| PCHAS_145880 | 0.2549 | 0.2742 | 0.307  | -0.089 | 0.1696 | 0.1899 | 1.0075 | 0.5471 | 0.0464 | -0.132 | 0.6541 | 0.3174 |
| PCHAS_131940 | 0.5684 | 0.3497 | 0.5357 | 0.0401 | 0.23   | 0.4279 | -0.263 | -0.421 | -0.366 | -0.246 | -0.295 | -0.154 |
| PCHAS_144940 | 0.1113 | -0.803 | -0.288 | -0.44  | -0.228 | 0.9552 | -0.59  | 0.0696 | 0.2185 | 1.8651 | 1.5753 | 1.5764 |
| PCHAS_051260 | 0.9535 | 0.0578 | 0.7596 | -0.079 | 0.008  | -0.44  | 0.2508 | -0.536 | -0.13  | -0.639 | 0.3253 | -0.058 |
| PCHAS_121100 | -0.165 | 0.0863 | 0.4168 | -0.25  | 0.0928 | -0.232 | 0.9169 | 0.476  | -0.249 | 0.3776 | 0.7575 | 0.0977 |
| PCHAS_000600 | 1.0709 | 0.6898 | 0.5006 | 0.322  | -0.111 | 0.096  | -0.193 | 0.1466 | -0.188 | 0.6698 | 0.4539 | 0.665  |
| PCHAS_146710 | -0.093 | -0.818 | -1.131 | -0.776 | -0.403 | 0.2281 | -0.116 | -0.267 | 0.1873 | 1.4299 | 0.9616 | 1.0534 |
| PCHAS_072410 | 1.0375 | 0.1528 | 0.4187 | 0.2177 | 0.0511 | -0.021 | -0.27  | -0.063 | -0.052 | 0.4203 | -0.604 | 0.4494 |
| PCHAS_114210 | -0.237 | 0.111  | 0.1638 | -0.124 | -0.493 | -0.403 | 0.4273 | -0.012 | -0.795 | -0.328 | -0.011 | -0.303 |
| PCHAS_010470 | -1.009 | -0.834 | -0.166 | -0.368 | -0.102 | -0.192 | 1.5919 | 0.5917 | -0.076 | 1.2042 | 0.7089 | 0.7459 |
| PCHAS_103000 | -0.566 | 0.5608 | 0.8427 | -0.262 | 0.045  | -0.851 | 1.111  | 0.0389 | -0.248 | -0.494 | -0.832 | -0.286 |
| PCHAS_135220 | 0.7662 | 0.2861 | 0.0448 | -0.019 | -0.022 | -0.294 | 0.1665 | -0.622 | 0.0475 | -0.996 | -0.086 | -0.691 |
| PCHAS_124470 | 0.2348 | -0.045 | 0.046  | -0.186 | 0.034  | -0.142 | -4E-04 | 0.0199 | -0.156 | 0.162  | 0.2201 | -0.049 |
| PCHAS_113190 | -0.779 | -1.735 | -0.739 | -0.752 | -0.253 | 0.221  | 0.4168 | 1.0367 | 0.4791 | 0.8727 | 0.2847 | 0.5191 |
| PCHAS_145730 | -0.686 | -0.723 | -0.591 | -0.881 | -0.222 | 0.0796 | 0.4188 | 0.7594 | 0.1803 | 1.3464 | 0.9856 | 0.7872 |
| PCHAS_050490 | -0.2   | 0.2057 | 0.218  | 0.3345 | 0.0554 | 0.6042 | -0.288 | -0.198 | 0.388  | 0.0491 | -0.542 | -0.053 |
| PCHAS_091340 | -0.756 | -0.327 | -0.389 | -0.174 | -0.042 | 0.3526 | 0.5564 | 0.6412 | 0.2621 | 0.3688 | 0.3009 | 0.4708 |
| PCHAS_061490 | -0.418 | -0.65  | -0.061 | -0.442 | -0.088 | 0.2048 | -0.051 | 0.2914 | 0.0782 | 0.3268 | 0.2323 | 0.1567 |
| PCHAS_020100 | -0.552 | 0.1848 | 0.3434 | 0.209  | 0.2388 | 0.4477 | 0.3398 | 0.6204 | 0.2091 | -0.005 | 0.5214 | -0.169 |
| PCHAS_102820 | -0.258 | 0.192  | 0.0375 | 0.3054 | 0.3068 | -0.013 | -0.184 | -0.068 | 0.1575 | -0.882 | -0.779 | -0.52  |
| PCHAS_131600 | 0.3365 | 0.5591 | 0.4336 | 0.4892 | 0.074  | -0.009 | -0.106 | -0.066 | 0.1937 | -0.574 | 0.2084 | -0.181 |
| PCHAS_122220 | -0.759 | 0.484  | 0.6938 | 0.1069 | 0.087  | -0.604 | -0.472 | 0.0773 | -0.284 | 0.6282 | -0.398 | 0.4572 |
| PCHAS_145670 | -0.518 | 0.2678 | 0.1998 | 0.0505 | 0.1478 | -0.093 | -0.069 | 0.205  | -0.273 | -0.733 | -0.935 | -0.692 |
| PCHAS_144610 | -0.277 | -0.284 | -0.163 | -0.193 | -0.021 | 0.0247 | -0.32  | 0.1732 | -0.055 | 0.8487 | 0.5443 | 0.3455 |
| PCHAS_031050 | -0.276 | -0.101 | 0.3226 | -0.069 | 0.1605 | 0.4392 | -0.521 | 0.3204 | 0.3805 | 0.6215 | -0.43  | 0.2251 |
| PCHAS_040720 | -0.399 | 0.0947 | 0.6064 | -0.014 | 0.1257 | 0.3495 | 1.1186 | 0.3728 | 0.3161 | -0.224 | 0.2172 | -0.336 |
| PCHAS_131890 | 0.9165 | 0.2141 | 0.6673 | 0.2045 | 0.0642 | -0.308 | 0.0549 | -1.038 | -0.241 | -1.448 | -0.467 | -0.881 |
| PCHAS_110610 | -0.34  | 0.0069 | 0.1569 | 0.3798 | 0.3952 | 0.2799 | 0.1505 | -0.132 | 0.224  | -1.266 | -0.807 | -0.865 |
| PCHAS_030540 | -0.042 | -0.08  | 0.2985 | 0.0038 | -0.038 | -0.297 | 0.2425 | 0.4121 | -0.168 | 0.0281 | 0.3643 | -0.118 |
| PCHAS_070740 | -0.803 | -0.631 | -0.133 | -0.263 | 0.1209 | -0.244 | -0.192 | 0.4371 | 0.276  | 0.2385 | -0.23  | 0.2098 |
| PCHAS_142790 | -0.663 | -0.218 | -0.31  | 0.1714 | 0.1881 | 0.2914 | 0.5443 | 0.1172 | 0.2962 | -0.624 | -0.856 | -0.605 |
| PCHAS_091420 | -0.603 | -0.514 | -0.076 | 0.2523 | -0.003 | 0.2023 | 0.0262 | -0.411 | 0.0161 | 0.1339 | 0.3102 | 0.2007 |
| PCHAS_081050 | 0.7126 | 0.8326 | 0.3718 | -0.043 | -0.22  | -0.124 | -0.055 | -0.297 | -0.272 | 0.1217 | -0.205 | -0.096 |
| PCHAS_103620 | -1.023 | -2.263 | -2.997 | -2.432 | -0.977 | 0.0896 | -0.666 | -0.514 | 0.0556 | 1.7857 | 1.4723 | 1.6555 |
| PCHAS_143450 | 0.2392 | 0.2819 | 0.2543 | 0.3466 | 0.1659 | 0.1382 | -0.592 | -0.239 | 0.1674 | -0.914 | -1.133 | -0.696 |
| PCHAS_140950 | 0.0531 | 0.0022 | 0.2214 | 0.3892 | 0.239  | 0.0031 | 0.121  | 0.0493 | 0.0635 | -0.207 | -0.149 | -0.001 |
| PCHAS_103500 | 0.2675 | 0.3083 | 0.2276 | 0.359  | 0.0836 | -0.12  | -0.872 | -0.295 | -0.206 | -1.251 | -0.813 | -0.848 |
| PCHAS_020180 | -0.2   | -0.623 | 0.1268 | -0.08  | 0.3685 | -0.504 | -0.064 | -0.08  | -0.563 | -1.181 | -2.122 | -0.755 |
| PCHAS_102100 | -0.103 | 0.4974 | 0.4336 | -0.037 | -0.211 | -0.345 | -0.08  | -0.126 | -0.841 | -1.388 | -0.665 | -0.403 |
| PCHAS_081120 | 0.4335 | 0.3091 | 0.1907 | -0.079 | -0.033 | -0.085 | 0.527  | 0.1665 | -0.05  | 0.2511 | 0.4612 | 0.0808 |
| PCHAS_092720 | -0.807 | -0.189 | 0.1045 | -0.368 | -0.007 | 0.4022 | -0.89  | 0.0999 | 0.127  | 0.7837 | -0.2   | 0.4814 |
| PCHAS_080590 | -0.326 | 0.1041 | 0.4449 | -0.006 | 0.1267 | -0.533 | -0.071 | -0.184 | -0.255 | -0.853 | -0.082 | -0.61  |
| PCHAS_052410 | -0.966 | -1.813 | -2.327 | -2.311 | -0.612 | 0.4867 | -0.537 | -0.563 | 0.4226 | 1.8137 | 1.36   | 1.6146 |
| PCHAS_111420 | 0.2055 | 0.0303 | 0.215  | -0.099 | 0.0246 | -0.29  | 0.4987 | 0.0533 | -0.263 | -0.2   | 0.5677 | 0.0204 |

|              |        |        |        |        |        |        |        |        |        |        |        |        |
|--------------|--------|--------|--------|--------|--------|--------|--------|--------|--------|--------|--------|--------|
| PCHAS_123270 | -0.086 | 0.0127 | -0.623 | 0.5059 | -0.005 | -0.179 | 0.2165 | -0.229 | -0.068 | -0.64  | -0.672 | -0.295 |
| PCHAS_080310 | -0.138 | -0.058 | 0.2385 | -0.097 | -0.142 | 0.609  | 0.1196 | -0.221 | -0.126 | 0.7025 | 1.3338 | 0.6559 |
| PCHAS_020950 | 0.6604 | 0.1498 | 0.3619 | -0.071 | -0.548 | -0.006 | 0.4367 | 0.0677 | -0.043 | 0.5981 | 1.4472 | 0.7417 |
| PCHAS_060650 | -0.824 | -0.113 | -0.865 | 0.4557 | -0.63  | -0.384 | 0.3254 | 0.3564 | 0.0617 | -0.41  | 0.1954 | -0.168 |
| PCHAS_145120 | 0.1819 | -0.881 | 0.2731 | -0.624 | 0.0286 | -0.058 | 1.2852 | 1.048  | -0.322 | 0.4686 | 0.81   | 0.2473 |
| PCHAS_113860 | -0.402 | 0.31   | 0.0518 | -0.216 | -0.106 | -0.416 | 0.3526 | -0.192 | -0.512 | -0.409 | -0.85  | -0.518 |
| PCHAS_090940 | 0.0027 | 0.3667 | 0.3899 | 0.2237 | 0.1164 | -0.343 | -0.268 | -0.106 | -0.316 | -0.63  | -0.667 | -0.065 |
| PCHAS_072840 | -0.08  | 0.2034 | 0.4051 | -0.452 | 0.1237 | -0.129 | -0.175 | -0.679 | -0.464 | -0.909 | -0.353 | -0.541 |
| PCHAS_040190 | 0.1795 | 0.1034 | -0.297 | -0.03  | -0.155 | -0.089 | 0.1953 | 0.2087 | 0.0593 | -0.032 | -0.077 | -0.131 |
| PCHAS_081380 | 0.3508 | 0.1606 | 1.1298 | -0.228 | 0.1731 | 0.0089 | 0.1822 | 0.2081 | -0.066 | 0.1005 | 0.2183 | -0.228 |
| PCHAS_080130 | 0.5384 | 0.3818 | 0.2714 | -0.122 | 0.1866 | -0.206 | 0.7642 | 0.0238 | -0.21  | -0.433 | 0.6349 | -0.12  |
| PCHAS_100400 | -0.178 | 0.0806 | -0.105 | 0.1314 | 0.0485 | 0.0586 | -0.075 | -0.048 | 0.2385 | 0.0251 | -0.502 | 0.0609 |
| PCHAS_111300 | 0.0073 | -0.418 | -0.178 | 0.046  | -0.098 | 0.1294 | 0.4279 | 0.4747 | 0.0649 | -0.386 | 0.6169 | 0.0785 |
| PCHAS_001010 | 0.4545 | 0.1787 | 0.0734 | 0.3199 | -0.248 | 0.1443 | -0.13  | -0.291 | -0.003 | -0.551 | 0.7745 | -0.258 |
| PCHAS_100700 | -0.475 | -0.919 | -0.056 | -0.692 | -0.147 | 0.7614 | 0.5276 | 0.578  | 0.5757 | 0.651  | 0.4972 | 0.9942 |
| PCHAS_040580 | -0.531 | -0.378 | -0.371 | -0.458 | 0.0899 | -0.262 | 0.5728 | 0.4061 | -0.125 | 0.5426 | 0.4056 | 0.3249 |
| PCHAS_100620 | 0.1105 | 0.131  | -0.002 | 0.1934 | 0.1795 | 0.2015 | -0.241 | 0.0748 | 0.2268 | -0.621 | -0.8   | -0.568 |
| PCHAS_134190 | -0.09  | -0.375 | -0.229 | -0.183 | -0.127 | 0.1962 | 0.6766 | 0.3262 | 0.194  | -0.082 | 0.3673 | 0.0917 |
| PCHAS_082290 | -0.197 | -0.152 | -0.038 | 0.229  | 0.4095 | 0.1797 | 0.6628 | 0.6393 | 0.1926 | -0.152 | -0.096 | -0.058 |
| PCHAS_000940 | 0.954  | 0.524  | 0.3118 | 0.1464 | -0.407 | -0.204 | -1.04  | -0.482 | -0.223 | -0.063 | -0.022 | -0.075 |
| PCHAS_072780 | 0.0239 | -0.208 | 0.5612 | -0.219 | -0.186 | -0.484 | 0.2599 | 0.563  | -0.581 | 1.2197 | 1.4344 | 1.0042 |
| PCHAS_140140 | -1.517 | -1.122 | -0.984 | -0.542 | -0.129 | 0.4967 | 0.9482 | 1.0333 | 0.5947 | 0.8603 | 0.0172 | 0.0078 |
| PCHAS_103970 | -0.568 | -0.89  | -0.96  | -0.614 | -0.248 | 0.5052 | -0.008 | 0.5539 | 0.5813 | 0.9357 | 0.3299 | 0.7817 |
| PCHAS_070860 | -0.13  | -0.051 | -0.23  | 0.1325 | 0.0269 | 0.4484 | 0.5727 | 0.8099 | 0.1691 | 0.4798 | 0.6551 | 0.2616 |
| PCHAS_072460 | -0.415 | -0.731 | -0.167 | -0.751 | 0.0352 | 0.0239 | 0.1743 | 0.029  | -0.098 | 1.1194 | 1.079  | 0.9866 |
| PCHAS_070760 | 0.506  | 0.1382 | 0.3112 | -0.157 | 0.1575 | -0.201 | 0.121  | 0.3114 | -0.195 | -0.231 | 0.504  | -0.312 |
| PCHAS_113370 | -0.479 | 0.7745 | 1.0818 | 0.31   | 0.1573 | -0.629 | -0.794 | -0.964 | -0.511 | -1.317 | -0.413 | -0.916 |
| PCHAS_133860 | 0.4396 | 0.1453 | 0.8592 | 0.4256 | 0.464  | -0.027 | 0.3441 | 0.5105 | 0.1244 | -0.339 | -0.286 | -0.218 |
| PCHAS_133520 | -0.338 | 0.1337 | 0.5529 | 0.4827 | 0.1732 | 0.3084 | 0.6896 | 0.4301 | 0.1213 | -0.667 | -0.046 | -0.489 |
| PCHAS_123550 | 0.1724 | 0.6752 | 0.4711 | 0.3647 | 0.2685 | -0.099 | -0.469 | -0.317 | -0.117 | -1.089 | -0.847 | -0.56  |
| PCHAS_081310 | 0.0287 | 0.1439 | 0.347  | 0.4195 | 0.3492 | -0.02  | -0.067 | 0.097  | 0.0249 | -0.414 | -0.436 | -0.249 |
| PCHAS_020160 | -0.084 | 0.7555 | 0.5259 | 0.3614 | 0.1262 | 0.5943 | -0.237 | 0.1296 | 0.2507 | -0.221 | -0.606 | 0.1384 |
| PCHAS_093370 | -0.703 | -0.55  | -0.373 | -0.378 | -0.097 | -0.665 | 0.8388 | 0.738  | -0.565 | 0.3815 | 0.2052 | 0.722  |
| PCHAS_031110 | -0.403 | -0.222 | -0.108 | 0.2355 | 0.1942 | 0.1177 | -0.19  | 0.0507 | 0.3651 | -0.185 | -0.929 | 0.8569 |
| PCHAS_142150 | 0.0594 | -0.916 | 0.0656 | -0.113 | 0.188  | 0.0185 | -0.077 | 0.383  | -0.082 | 0.2387 | 0.548  | -0.03  |
| PCHAS_110400 | -0.02  | -0.191 | -0.225 | -0.06  | 0.0537 | -0.088 | 0.3448 | 0.3954 | 0.0309 | 0.0566 | 0.1801 | 0.2976 |
| PCHAS_062160 | -0.249 | 0.2605 | 0.3614 | -0.078 | -0.156 | -0.106 | -0.083 | -0.191 | -0.07  | -1.133 | -0.696 | -1.181 |
| PCHAS_114420 | -0.227 | -0.065 | -0.839 | 0.4237 | -0.652 | 0.9243 | 0.2773 | 0.0358 | 0.6538 | 0.9477 | 0.6782 | 0.5636 |
| PCHAS_051980 | -0.969 | -0.007 | 0.1398 | 0.3633 | 0.1003 | 0.2249 | -0.032 | 0.0887 | 0.1354 | -0.512 | -0.162 | -0.294 |
| PCHAS_011000 | -1.246 | -1.481 | -1.282 | -1.155 | -0.282 | 0.031  | 0.8608 | 0.9988 | 0.0846 | 0.8159 | 0.5984 | 0.9814 |
| PCHAS_080630 | 0.4118 | -0.282 | 0.2224 | -0.64  | -0.839 | -0.508 | 0.1886 | 0.3665 | -0.467 | 0.118  | 0.7475 | -0.288 |
| PCHAS_020090 | -0.405 | -0.722 | -0.593 | -0.452 | -0.101 | 0.4576 | 0.2932 | 1.0103 | 0.3059 | 1.2655 | 0.5268 | 0.9589 |
| PCHAS_072500 | -0.315 | -0.303 | -0.009 | 0.14   | 0.2055 | 0.3378 | 0.3521 | 0.3657 | 0.2127 | -0.044 | -0.069 | -0.028 |
| PCHAS_123950 | 0.2745 | 0.5846 | 0.7701 | 0.3131 | -0.029 | -0.155 | -0.538 | -0.646 | -0.274 | -1.01  | -1.715 | -0.488 |
| PCHAS_130060 | 0.1336 | 0.3844 | 0.1668 | -0.057 | -0.277 | -0.518 | -0.535 | -0.469 | -0.567 | -0.827 | -0.109 | -0.581 |
| PCHAS_081010 | 0.6099 | 0.473  | 0.4242 | 0.3328 | 0.0939 | -0.467 | -0.616 | -0.261 | -0.356 | -0.821 | -1.058 | -0.618 |
| PCHAS_144530 | -0.285 | -1.313 | -1.049 | -0.219 | -0.096 | 0.6266 | 0.2075 | 0.4738 | 0.4256 | -0.113 | 1.047  | 0.2305 |
| PCHAS_061180 | 0.1486 | 0.409  | 0.2297 | 0.4968 | 0.1485 | -0.006 | -0.393 | -0.469 | -1E-03 | -0.292 | -0.926 | -0.43  |
| PCHAS_121080 | 0.0536 | 0.0259 | 0.1074 | -0.052 | 0.0015 | 0.0625 | 0.5381 | -0.146 | 0.0879 | -0.167 | -0.35  | -0.147 |
| PCHAS_133020 | 0.959  | -0.686 | -0.366 | 0.47   | -0.305 | 1.1642 | 1.8771 | 1.2394 | 0.6242 | 0.8799 | 0.6809 | 0.8712 |

|              |        |        |        |        |        |        |        |        |        |        |        |        |
|--------------|--------|--------|--------|--------|--------|--------|--------|--------|--------|--------|--------|--------|
| PCHAS_070240 | 0.4005 | -0.077 | -0.322 | -0.209 | -0.333 | -0.029 | 0.4814 | 0.3746 | -0.178 | 0.1564 | 0.553  | -0.046 |
| PCHAS_135650 | 0.1381 | 0      | 0.7269 | 1.3463 | 0.2143 | -0.004 | -0.054 | -0.136 | -0.089 | -0.576 | -0.267 | -0.513 |
| PCHAS_145280 | 0.6304 | 0.8381 | -0.03  | 0.2129 | -0.144 | -0.033 | 0.1412 | 0.3797 | 0.2235 | 0.5974 | 0.3484 | 0.5791 |
| PCHAS_051270 | 0.1375 | 0.2435 | -0.028 | 0.1709 | 0.0576 | 0.0408 | -0.535 | -0.137 | 0.0493 | -0.48  | -0.934 | -0.407 |
| PCHAS_132500 | 0.5445 | 0.5552 | 0.6359 | -0.121 | 0.1239 | -0.522 | 0.0135 | -0.995 | -0.43  | -1.477 | -0.534 | -0.957 |
| PCHAS_133490 | 0.1999 | 0.3787 | 0.4304 | 0.3268 | 0.1048 | 0.3615 | -0.265 | -0.115 | 0.2654 | -0.36  | -1.242 | -0.257 |
| PCHAS_100510 | -0.754 | -0.307 | -0.232 | 0.1165 | -0.085 | 0.2537 | 0.7761 | 0.4227 | 0.2696 | -0.2   | -0.142 | -0.357 |
| PCHAS_011240 | 0.2688 | 0.1551 | 0.378  | 0.3588 | 0.1253 | -0.02  | 0.075  | 0.1622 | 0.0317 | -0.241 | -0.049 | -0.232 |
| PCHAS_123690 | -0.034 | 0.1485 | 0.2524 | 0.0401 | 0.0487 | -0.183 | 0.4453 | -0.125 | -0.108 | -0.581 | -0.901 | -0.449 |
| PCHAS_010590 | 0.2902 | 0.3673 | 0.3991 | 0.2744 | 0.1022 | 0.0268 | -0.44  | -0.665 | -0.035 | -1.224 | -1.055 | -0.908 |
| PCHAS_130810 | -0.126 | -0.475 | -0.358 | 0.3205 | -0.029 | -0.07  | 0.3937 | -0.221 | -0.059 | -1.124 | -0.661 | -0.464 |
| PCHAS_100630 | -0.152 | -0.08  | 0.0796 | -0.042 | 0.2352 | 0.0853 | -0.187 | -0.151 | -0.056 | 0.0181 | -0.129 | -0.109 |
| PCHAS_103400 | -0.277 | -0.192 | -0.153 | 0.2845 | 0.1133 | -0.073 | 0.2884 | 0.4571 | -0.017 | 0.2377 | -0.182 | 0.0984 |
| PCHAS_144260 | 0.4671 | 0.5745 | 0.2445 | 0.3114 | 0.1556 | -0.461 | -0.558 | -0.181 | -0.224 | -0.42  | -1.172 | 0.0164 |
| PCHAS_113480 | 0.1814 | 0.047  | 0.6305 | 0.1231 | -0.015 | -0.142 | -0.41  | -0.138 | -0.355 | -0.303 | 0.0004 | -0.375 |
| PCHAS_020720 | 0.6587 | 0.4363 | 0.4005 | 0.0453 | -0.113 | -0.34  | -1.163 | -0.549 | -0.272 | -0.974 | -0.706 | -0.306 |
| PCHAS_124510 | 0.0617 | -0.068 | -0.193 | -0.085 | 0.1577 | 0.5375 | -0.342 | 0.351  | 0.2169 | 1.1859 | 0.7814 | 1.2134 |
| PCHAS_146280 | 0.2836 | -0.246 | -0.021 | -0.286 | -0.097 | 0.3464 | -0.377 | -0.218 | 0.3918 | 1.2884 | 1.57   | 1.0182 |
| PCHAS_111260 | 0.2442 | 0.4171 | 0.331  | 0.4728 | 0.024  | -0.143 | 0.1919 | -0.772 | -0.279 | -1.143 | -0.99  | -1.29  |
| PCHAS_072930 | 0.4112 | 0.1456 | 0.6201 | 0.2567 | 0.0968 | -0.407 | 0.6353 | -0.486 | -0.194 | -1.055 | -0.468 | -0.846 |
| PCHAS_143110 | -0.243 | 0.2216 | 0.5235 | -0.099 | -0.039 | -0.444 | -0.001 | 0.4368 | -0.465 | 0.157  | 0.4967 | 0.1532 |
| PCHAS_146220 | -0.312 | -1.115 | -0.513 | -1.005 | -0.202 | 0.1713 | 0.8012 | 0.781  | 0.1296 | 1.2276 | 1.4437 | 1.0715 |
| PCHAS_121390 | -0.005 | 0.2247 | 0.2156 | -0.18  | 0.0101 | -0.042 | 0.122  | -0.368 | -0.38  | -0.374 | -1.244 | -0.494 |
| PCHAS_093110 | -0.389 | 0.2966 | 0.6309 | 0.2057 | 0.1505 | 0.338  | -0.229 | 0.128  | 0.1133 | 0.3378 | 0.1764 | 0.0842 |
| PCHAS_050750 | -0.631 | 0.3115 | 0.3173 | 0.3703 | 0.182  | -0.192 | 0.3323 | -0.777 | -0.267 | -1.917 | -1.076 | -1.371 |
| PCHAS_103890 | 0.0029 | 0.0822 | -0.019 | 0.3518 | 0.3105 | -0.09  | 0.7244 | 0.3412 | -0.172 | -0.224 | 0.1631 | -0.266 |
| PCHAS_114100 | 0.1197 | -0.14  | -0.225 | -0.478 | -0.161 | -0.165 | 0.2489 | 0.0423 | -0.203 | 0.5278 | 0.7128 | 0.6187 |
| PCHAS_093570 | -0.794 | -0.119 | 0.1786 | 0.305  | 0.0628 | -0.356 | -0.421 | -0.226 | -0.414 | -1.334 | -0.425 | -0.47  |
| PCHAS_050470 | 0.4949 | 0.2761 | 0.6467 | 0.3011 | 0.1362 | -0.143 | 0.4329 | 0.0349 | 0.0911 | -0.723 | -0.034 | -0.718 |
| PCHAS_041610 | -0.441 | -1.345 | -0.518 | -0.585 | -0.119 | 0.1998 | 0.4055 | 0.4286 | -0.046 | 0.5691 | 1.2008 | 0.4433 |
| PCHAS_142290 | -0.244 | -0.141 | 0.0343 | 0.0488 | 0.1015 | -0.242 | -0.293 | -0.142 | -0.131 | -1.152 | -0.594 | -0.853 |
| PCHAS_000530 | 0.8743 | 0.9997 | 0.6696 | -0.314 | -0.557 | -0.891 | -1.101 | -1.28  | -0.831 | -0.988 | -0.124 | -1.009 |
| PCHAS_121510 | 0.2991 | 0.141  | 0.2324 | -0.007 | -0.031 | 0.5664 | -0.206 | -0.233 | 0.0196 | 0.3603 | 2.1057 | 0.5634 |
| PCHAS_143310 | 0.5906 | 0.2059 | -0.123 | -0.025 | 0.0338 | 0.1571 | 0.6041 | 0.6843 | 0.3028 | 0.3963 | -0.149 | 0.0805 |
| PCHAS_062270 | 1.0513 | 0.4793 | 0.8432 | 0.092  | 0.0636 | -0.424 | 0.3302 | -0.038 | -0.247 | -0.758 | 0.4683 | -0.26  |
| PCHAS_123590 | -0.419 | -0.455 | -0.05  | -0.388 | 0.0602 | -0.313 | -0.356 | 0.4533 | -0.591 | -0.082 | -0.443 | -0.498 |
| PCHAS_071890 | -0.502 | -1.408 | -1.306 | -1.418 | -0.578 | 0.4196 | 0.1108 | 0.2805 | 0.1757 | 1.3874 | 1.1117 | 1.5724 |
| PCHAS_030280 | -0.817 | 0.3186 | 0.2324 | -0.318 | -0.362 | -0.44  | -0.401 | 0.0728 | -0.544 | -0.132 | -0.287 | -0.231 |
| PCHAS_143360 | -0.39  | -0.423 | -0.033 | -0.419 | -0.066 | 0.2071 | 0.3472 | 0.2657 | 0.1989 | 0.3706 | 0.3613 | 0.1687 |
| PCHAS_124420 | -0.159 | 0.0273 | 0.5075 | 0.1245 | 0.038  | 0.0176 | 0.2997 | 0.0683 | -0.193 | -0.246 | 0.1453 | -0.399 |
| PCHAS_072890 | 0.7183 | 0.5852 | 0.5486 | 0.3337 | -0.058 | -0.067 | 0.1544 | 0.1363 | 0.0031 | -0.122 | -0.337 | 0.0534 |
| PCHAS_135080 | 0.9598 | 0.0296 | 0.0645 | -0.357 | 0.1519 | -0.525 | 0.2968 | -0.006 | -0.494 | -0.353 | 0.5523 | -0.537 |
| PCHAS_040660 | 0.1665 | 0.1572 | 0.3219 | 0.3788 | 0.1783 | -0.319 | -7E-04 | -0.101 | -0.244 | -0.919 | -0.274 | -0.405 |
| PCHAS_144770 | 0.2858 | 0.3639 | 0.122  | 0.3231 | 0.1116 | 0.32   | 0.61   | -0.276 | 0.2171 | -0.739 | -0.839 | -0.519 |
| PCHAS_134050 | -0.846 | -0.626 | -0.378 | 0.183  | 0.2134 | 0.2105 | 0.4087 | 0.4092 | 0.2721 | -0.072 | -0.198 | 0.0655 |
| PCHAS_061670 | 0.0641 | 0.1878 | 0.2248 | 0.0009 | -0.16  | 0.0247 | -0.018 | 0.2228 | -0.076 | 0.0679 | 0.1641 | 0.3488 |
| PCHAS_113630 | -0.709 | -0.07  | -0.146 | 0.1757 | 0.2902 | -0.225 | 0.2548 | -0.437 | -0.378 | -0.445 | -0.519 | -0.451 |
| PCHAS_141180 | -0.224 | -0.175 | 0.1507 | -0.092 | -0.083 | -0.076 | 0.0994 | 0.3731 | -0.045 | -0.025 | 0.1878 | -0.199 |
| PCHAS_121210 | 0.8277 | -0.052 | 0.7509 | -0.095 | -0.093 | 0.1076 | 0.5197 | 0.2088 | -0.202 | -0.213 | -0.112 | -0.083 |
| PCHAS_142050 | 0.4908 | 0.3828 | 0.889  | 0.2811 | 0.0893 | -0.622 | 0.8642 | -0.292 | -0.552 | -0.42  | -1.272 | -0.483 |

|              |        |        |        |        |        |        |        |        |        |        |        |        |
|--------------|--------|--------|--------|--------|--------|--------|--------|--------|--------|--------|--------|--------|
| PCHAS_140440 | -0.529 | -1.148 | -0.78  | -0.791 | -0.224 | 0.5848 | 0.7841 | 0.4359 | 0.3041 | 1.0436 | 0.6812 | 1.12   |
| PCHAS_121720 | -0.865 | -1.144 | 0.8693 | 0.9246 | 0.5994 | 0.007  | 0.8304 | -0.417 | 0.2331 | -1.024 | -0.599 | -1.127 |
| PCHAS_092390 | 0.1278 | -0.288 | 0.088  | -0.362 | -0.265 | -0.147 | 0.2496 | 0.0803 | -0.576 | 2.4285 | 1.8979 | 0.6569 |
| PCHAS_031450 | 0.5771 | 0.1919 | -0.294 | 0.0597 | 0.0264 | -0.339 | 0.2883 | -0.273 | -0.23  | -0.761 | -0.469 | -0.475 |
| PCHAS_030710 | 0.1188 | -0.086 | -0.288 | -0.271 | -0.246 | 0.4861 | 0.296  | -0.136 | 0.3388 | 0.4717 | 0.6505 | 0.3677 |
| PCHAS_050830 | -0.615 | 0.2102 | 0.2357 | -0.06  | -0.022 | 0.1038 | -0.11  | 0.4856 | 0.1457 | 0.288  | 0.4258 | 0.4913 |
| PCHAS_061160 | 0.3961 | 0.3257 | 0.1244 | -0.753 | -0.391 | -0.336 | -0.623 | -0.188 | -0.418 | 0.52   | 1.2627 | 0.5476 |
| PCHAS_142040 | 0.1838 | 0.3886 | 0.8249 | 0.4139 | 0.1615 | 0.5065 | 1.3168 | -0.293 | 0.4338 | -0.324 | -0.39  | -0.042 |
| PCHAS_081180 | 0.7434 | 0.4311 | 0.2695 | 0.0502 | -0.033 | -1.013 | 0.6668 | -0.618 | -0.793 | -1.105 | 0.0211 | -0.599 |
| PCHAS_144620 | -0.759 | -0.093 | 0.9245 | 0.4049 | 0.4472 | 0.0825 | 0.0449 | -0.098 | 0.1753 | -1.193 | -0.852 | -0.831 |
| PCHAS_146510 | 0.2215 | 0.0701 | 0.375  | 0.1772 | 0.3528 | -0.123 | 0.4805 | -0.583 | -0.049 | -1.16  | -0.153 | -0.874 |
| PCHAS_082060 | -0.523 | -0.369 | -0.326 | 0.0953 | 0.2269 | 0.2585 | 0.7042 | 1.0224 | 0.3306 | -0.01  | -0.781 | -0.366 |
| PCHAS_110870 | 0.532  | 0.4465 | 0.348  | 0.2561 | 0.1883 | -0.076 | -0.449 | -0.47  | -0.082 | -1.073 | -1.161 | -0.554 |
| PCHAS_093320 | 0.3813 | -0.48  | 0.4759 | 0.0059 | 0.2817 | 0.2015 | 1.1716 | 0.8789 | -0.279 | 0.2514 | -0.076 | 0.5539 |
| PCHAS_123160 | 0.2479 | 0.0323 | 0.4622 | 0.2568 | 0.1244 | -0.185 | 0.2003 | -0.052 | -0.214 | -0.374 | 0.1791 | -0.374 |
| PCHAS_081750 | 0.2238 | 0.2802 | 0.16   | 0.5308 | 0.0873 | -0.134 | -0.304 | -0.372 | -0.219 | -0.654 | -0.598 | -0.42  |
| PCHAS_144330 | -0.164 | 0.1115 | 0.35   | 0.26   | 0.0173 | 0.0966 | -0.752 | 0.0507 | -0.067 | -0.323 | -0.102 | -0.168 |
| PCHAS_124460 | -0.088 | -0.084 | 0.0223 | 0.1521 | 0.11   | 0.3661 | -0.205 | 0.2164 | 0.6792 | 0.678  | -0.537 | 0.5804 |
| PCHAS_131510 | 1.557  | 0.5618 | 0.3974 | 0.0228 | 0.1421 | -0.217 | 0.3206 | -0.388 | -0.181 | -1.301 | -0.43  | -0.684 |
| PCHAS_144430 | 0.1213 | -0.232 | 0.0301 | 0.1394 | 0.0169 | 0.3934 | 0.0689 | 0.2218 | 0.3042 | 0.1149 | -0.38  | 0.3162 |
| PCHAS_143020 | -0.996 | -0.571 | -0.599 | -1.117 | -0.462 | 0.0961 | 0.2111 | 0.8431 | 0.0921 | 0.9544 | 0.7733 | 1.1244 |
| PCHAS_111210 | -0.281 | 0.548  | 0.586  | 0.6176 | 0.2177 | -0.137 | 0.1386 | -0.68  | -0.064 | -0.513 | -0.869 | -0.087 |
| PCHAS_061360 | 0.3635 | 0.5142 | 0.6379 | 0.0369 | 0.3127 | -0.389 | 0.4972 | -0.059 | -0.357 | -0.217 | 0.3861 | 0.1017 |
| PCHAS_092670 | -0.125 | -0.276 | -0.137 | -0.553 | -0.379 | -0.025 | -0.245 | 0.3844 | -0.083 | 0.1396 | 1.0338 | 0.7107 |
| PCHAS_134920 | 0.5512 | 0.202  | 0.4248 | 0.0768 | -0.268 | -0.372 | 0.0833 | -0.179 | -0.32  | -0.682 | 0.21   | -0.371 |
| PCHAS_080220 | 0.4874 | 0.5395 | 0.2927 | 0.4404 | 0.2596 | -0.326 | -0.162 | -0.576 | -0.319 | -1.53  | -1.59  | -1.182 |
| PCHAS_112410 | -1.166 | -0.498 | 0.4617 | -0.391 | 0.1087 | 0.2231 | 0.7548 | 0.7504 | 0.0916 | 0.4844 | 0.6776 | 0.2297 |
| PCHAS_141740 | -1.281 | -1.905 | -1.857 | -1.341 | -0.21  | 0.5914 | 1.0234 | 1.0053 | 0.576  | 0.6689 | 0.036  | 0.4169 |
| PCHAS_124200 | -0.288 | 0.191  | 0.2901 | 0.0576 | -0.149 | 0.192  | -0.153 | 0.2377 | -0.03  | -0.516 | 0.3028 | -0.285 |
| PCHAS_142230 | 0.3077 | 0.4366 | 0.2383 | 0.4943 | -0.102 | -0.125 | -0.479 | -0.34  | -0.107 | -0.743 | -0.647 | -0.621 |
| PCHAS_144760 | -0.39  | -0.207 | -0.374 | 0.2181 | 0.3047 | 0.2598 | 0.146  | 0.2499 | 0.258  | -0.516 | -0.381 | -0.43  |
| PCHAS_134470 | -0.258 | 0.1414 | -0.008 | -0.262 | 0.0379 | 0.4227 | 0.0829 | 0.067  | 0.2568 | 0.0576 | 0.2531 | -0.03  |
| PCHAS_072010 | -0.032 | 0.1256 | 0.5004 | 0.0616 | 0.3491 | -0.446 | -0.182 | 0.2735 | -0.187 | -0.422 | -0.552 | -0.037 |
| PCHAS_146760 | 0.6441 | 0.2152 | -0.008 | -0.032 | -0.351 | -0.217 | -0.344 | -0.537 | -0.249 | -0.706 | 0.2001 | -0.796 |
| PCHAS_102090 | -0.037 | -1.156 | -1.071 | -1.369 | -0.46  | 0.2033 | 0.0437 | -0.038 | -0.004 | 1.0547 | 0.6296 | 0.9177 |
| PCHAS_041160 | -0.147 | 0.0307 | 0.5279 | 0.4026 | 0.0662 | 0.1303 | 0.0477 | 0.2152 | 0.1689 | -0.74  | -0.215 | -0.684 |
| PCHAS_070380 | -0.129 | -1.088 | -0.407 | -0.395 | 0.1802 | 0.7554 | 0.8432 | 0.6499 | 0.7946 | 0.6247 | 0.0845 | 0.0624 |
| PCHAS_081550 | 0.0464 | -0.439 | 0.1514 | -0.276 | -0.281 | -0.151 | 0.215  | -0.41  | -0.228 | 0.1775 | 0.7582 | 0.2392 |
| PCHAS_080610 | 0.2279 | 0.286  | 0.2989 | 0.0835 | 0.0016 | -0.192 | -0.027 | -0.756 | -0.185 | -0.867 | -0.639 | -0.58  |
| PCHAS_141960 | 0.4488 | 0.5483 | 0.5467 | 0.4921 | -0.131 | -0.274 | -0.672 | -1.352 | -0.497 | -1.947 | -1.638 | -1.202 |
| PCHAS_110820 | 0.2481 | 0.0765 | -0.564 | -0.344 | -0.154 | 0.2841 | -0.382 | -0.023 | 0.201  | 1.0435 | 1.3621 | 0.8393 |
| PCHAS_041700 | -0.102 | 0.4163 | 0.4623 | 0.3769 | 0.1456 | 0.197  | -0.043 | 0.246  | 0.1092 | 0.1172 | 0.5158 | 0.3359 |
| PCHAS_071380 | 0.7573 | -0.268 | -0.404 | 0.03   | -0.021 | 0.2518 | 0.1945 | -0.193 | -0.113 | 0.5824 | 1.1746 | 0.1088 |
| PCHAS_040980 | -0.395 | -0.193 | 0.7873 | 0.104  | 0.2477 | 0.2499 | 0.0102 | -0.019 | 0.2185 | 0.5712 | -0.256 | -0.079 |
| PCHAS_091110 | -0.541 | -0.353 | -0.073 | -0.067 | 0.2693 | 0.1297 | 0.6789 | 0.3131 | 0.2818 | -0.655 | -0.113 | -0.579 |
| PCHAS_010850 | 0.3147 | 0.4057 | 0.3257 | 0.0663 | -0.186 | 0.0862 | -0.4   | 0.0444 | -0.148 | -0.248 | -0.435 | -0.422 |
| PCHAS_080330 | -0.302 | -0.813 | -0.4   | -0.641 | -0.154 | 0.7155 | 0.4154 | 0.492  | 0.4542 | 1.3081 | 0.4149 | 0.8516 |
| PCHAS_120650 | -1.245 | -0.087 | 0.1094 | -0.009 | 0.2748 | 0.2336 | 0.6293 | 0.4996 | 0.2052 | -0.241 | -0.019 | -0.459 |
| PCHAS_124310 | 0.2842 | 0.1693 | 0.2185 | 0.2369 | 0.1408 | 0.0882 | -0.203 | -0.306 | -0.094 | -0.516 | -0.454 | -0.3   |
| PCHAS_082100 | -0.375 | -0.347 | -0.824 | -0.395 | -0.217 | -0.081 | 0.4601 | 0.3211 | 0.012  | 0.2234 | 0.1326 | 0.3332 |

|              |        |        |        |        |        |        |        |        |        |        |        |        |
|--------------|--------|--------|--------|--------|--------|--------|--------|--------|--------|--------|--------|--------|
| PCHAS_140710 | 0.2352 | -0.028 | 0.0272 | -0.293 | -0.068 | -0.151 | 0.6965 | 0.2257 | -0.171 | 0.2683 | 0.2419 | 0.0873 |
| PCHAS_050320 | 0.1316 | 0.4386 | 0.6888 | 0.4121 | 0.0371 | -0.817 | -0.407 | -0.868 | -0.739 | -1.846 | -2.277 | -1.407 |
| PCHAS_092680 | -0.091 | 0.0972 | 0.247  | 0.4914 | -0.072 | 0.2151 | -0.205 | -0.252 | 0.1079 | -0.436 | -0.852 | -0.416 |
| PCHAS_146210 | 1.0392 | -0.027 | 1.0773 | -0.087 | 0.1807 | -0.202 | 0.5229 | 0.3696 | -0.147 | -0.558 | 0.4412 | -0.329 |
| PCHAS_132990 | 0.0638 | 0.062  | -0.016 | -0.159 | -0.49  | -0.717 | -0.841 | -0.217 | -0.753 | -0.106 | 0.3227 | -0.408 |
| PCHAS_130880 | 0.4149 | 0.0109 | 0.2676 | -0.22  | 0.0221 | -0.611 | 0.2863 | -0.016 | -0.366 | -1.079 | -0.356 | -0.373 |
| PCHAS_133460 | 0.5086 | 0.4358 | 0.3312 | 0.1316 | 0.0038 | 0.0851 | -1.151 | -0.249 | -0.041 | -0.331 | -0.429 | -0.257 |
| PCHAS_031350 | 1.117  | -0.153 | -0.059 | -0.282 | -0.073 | -0.03  | 0.1369 | -0.176 | 0.1555 | 0.8971 | 1.8802 | 0.9791 |
| PCHAS_145920 | 0.629  | -0.425 | -0.363 | -0.196 | -0.353 | -0.277 | 0.2775 | 0.4558 | -0.038 | 0.3214 | 0.5173 | 0.4026 |
| PCHAS_000540 | 0.6719 | -0.174 | -0.005 | -0.988 | -0.179 | -0.487 | -0.288 | -0.348 | -0.587 | 0.0295 | 0.1795 | 0.2704 |
| PCHAS_072230 | 1.1568 | -0.377 | -0.221 | -0.516 | -0.076 | 0.6429 | -0.119 | -0.444 | 0.2784 | 1.4953 | 1.8636 | 1.4353 |
| PCHAS_090710 | 1.0578 | 0.3275 | 0.2431 | 0.7493 | 0.1609 | -0.101 | -0.875 | -0.463 | -0.08  | -1.35  | -2.088 | -0.958 |
| PCHAS_102560 | -1.166 | -0.925 | -0.515 | -0.218 | 0.0799 | 0.288  | 0.6457 | 0.9374 | 0.2642 | 0.5677 | 0.3618 | 0.3625 |
| PCHAS_141790 | -0.665 | 0.0026 | -0.078 | 0.2751 | 0.1802 | -0.015 | -0.069 | 0.3034 | 0.3656 | -0.164 | -0.418 | 0.0199 |
| PCHAS_113040 | 0.4004 | 0.0486 | 0.4407 | 0.3144 | 0.2305 | -0.786 | -0.904 | -0.911 | -0.858 | -0.866 | -0.899 | -0.679 |
| PCHAS_121200 | 0.4798 | 0.3185 | 0.4691 | 0.0123 | 0.0494 | -0.548 | -0.358 | -0.56  | -0.704 | -0.862 | -0.184 | -0.667 |
| PCHAS_061150 | 0.1829 | 0.2281 | -0.154 | -0.049 | -0.192 | 0.185  | -0.128 | -0.181 | -0.178 | 0.1154 | 0.4362 | 0.1027 |
| PCHAS_101070 | -0.395 | 0.2784 | 0.3024 | 0.2289 | 0.187  | -0.449 | 0.7887 | -0.488 | -0.389 | -0.999 | -1.071 | -0.808 |
| PCHAS_080800 | -0.304 | -0.101 | -0.199 | -0.508 | -0.179 | -0.058 | 0.1037 | -0.016 | -0.02  | 0.1277 | 0.9541 | 0.0819 |
| PCHAS_070980 | -0.235 | 0.3895 | 0.08   | 0.2626 | 0.228  | 0.2496 | 0.3835 | 0.1944 | 0.4322 | -0.357 | -0.197 | -0.071 |
| PCHAS_122030 | 0.2536 | -0.201 | 0.5263 | 0.2138 | 0.0541 | 0.1083 | -0.083 | -0.441 | 0.0187 | -0.843 | -1.212 | -0.24  |
| PCHAS_080690 | 0.3593 | 0.2031 | 0.362  | 0.1977 | 0.1903 | -0.128 | -0.149 | -0.558 | -0.235 | -1.405 | -0.495 | -0.755 |
| PCHAS_051460 | -0.389 | 0.0863 | -0.122 | 0.2193 | 0.1735 | 0.0931 | -0.48  | 0.2559 | -0.265 | -0.49  | -0.471 | -0.32  |
| PCHAS_122660 | 0.9103 | 0.5356 | 0.4011 | 0.3114 | 0.1691 | -0.37  | 0.279  | -0.156 | -0.296 | -0.631 | -0.387 | -0.015 |
| PCHAS_051200 | 0.0246 | 0.0232 | -0.037 | -0.115 | 0.0117 | -0.111 | 0.1484 | -0.159 | -0.432 | -0.434 | -0.334 | -0.49  |
| PCHAS_030590 | -0.548 | -0.245 | -0.256 | -0.437 | -0.427 | 0.0505 | -0.458 | -0.513 | -0.103 | 0.2685 | 0.342  | 0.7847 |
| PCHAS_090740 | -0.663 | -0.967 | -0.932 | -0.566 | -0.127 | -0.393 | 0.337  | -0.088 | -0.263 | 0.7723 | 1.2077 | 0.5854 |
| PCHAS_100370 | 0.1879 | 0.151  | -0.09  | 0.0157 | -0.042 | -0.022 | -0.179 | -0.021 | 0.0018 | 0.3864 | -0.062 | 0.1927 |
| PCHAS_102740 | 0.726  | 0.438  | 0.3253 | 0.436  | 0.1457 | -0.409 | -0.479 | -1.34  | -0.514 | -1.438 | -0.878 | -1.143 |
| PCHAS_101110 | 0.5293 | 0.4948 | -0.029 | 0.2481 | -0.004 | -0.313 | -0.035 | -1.28  | -0.364 | -1.606 | -1.14  | -1.092 |
| PCHAS_143710 | 0.2012 | -0.177 | 0.1507 | -0.366 | 0.1831 | -0.575 | 0.7081 | 0.2491 | -0.082 | -0.335 | 0.1527 | -0.234 |
| PCHAS_052060 | 0.0509 | -0.314 | -0.533 | -0.53  | -0.203 | 0.38   | 0.0935 | -0.041 | 0.0966 | 1.4736 | 1.049  | 1.5377 |
| PCHAS_120410 | 0.6256 | 0.211  | 0.3716 | 0.0632 | 0.0271 | -0.117 | 0.3691 | -0.051 | -0.021 | -0.577 | -0.062 | -0.647 |
| PCHAS_143960 | 0.4809 | -1.17  | -1.291 | -1.575 | -0.858 | -0.16  | -0.809 | -0.457 | -0.287 | 1.6186 | 2.0244 | 1.6518 |
| PCHAS_030680 | -0.849 | -0.616 | -0.756 | -0.493 | -0.229 | -0.257 | 0.7154 | 0.4145 | -0.082 | 0.2133 | 0.5517 | 0.2605 |
| PCHAS_100590 | 0.4568 | 0.48   | 0.7891 | 0.1664 | 0.0434 | 1.1725 | 2.4828 | 0.0684 | 1.1898 | 0.404  | 0.0517 | 0.2468 |
| PCHAS_092540 | 0.8571 | 0.3697 | 0.2324 | -0.341 | -0.41  | -0.896 | -0.604 | -0.614 | -0.465 | -0.689 | 0.1679 | -0.793 |
| PCHAS_061250 | -0.207 | -0.454 | -0.513 | -0.495 | 0.1068 | 0.1452 | 0.6478 | 0.303  | 0.1728 | -0.047 | -0.283 | 0.2817 |
| PCHAS_050650 | 0.1113 | -0.138 | 0.1857 | -0.013 | -0.138 | -0.038 | -0.046 | 0.0861 | -0.38  | -0.222 | -0.066 | -0.26  |
| PCHAS_060710 | 0.4391 | 0.4919 | 0.4071 | 0.3915 | -0.093 | -0.391 | -0.551 | -0.589 | -0.35  | -1.17  | -1.172 | -0.796 |
| PCHAS_000820 | 0.209  | 0.4748 | 0.2231 | -0.549 | -0.402 | 0.353  | -0.316 | 0.2403 | 0.0633 | 1.6593 | 2.2489 | 2.1032 |
| PCHAS_113260 | 0.4682 | 0.1806 | -0.113 | -0.149 | 0.0152 | 0.0482 | -0.41  | -0.138 | 0.0747 | 1.1348 | 0.9435 | 0.9455 |
| PCHAS_132170 | -0.804 | -0.059 | 0.1645 | 0.0277 | -0.027 | 0.0884 | 0.2895 | -0.299 | 0.1688 | -0.943 | -0.805 | -0.833 |
| PCHAS_110940 | -0.687 | -1.132 | -0.986 | -0.771 | -0.362 | 0.5225 | 0.2197 | 1.0449 | 0.5077 | 0.95   | -0.05  | 0.6479 |
| PCHAS_083220 | -0.028 | 0.6027 | 0.5815 | 0.2989 | 0.1471 | -0.063 | -0.097 | -0.429 | -0.064 | -0.694 | -0.903 | -0.726 |
| PCHAS_132540 | -0.614 | -0.531 | -0.666 | -0.33  | -0.48  | -0.812 | 0.6845 | 0.3301 | -0.307 | 0.7023 | 0.9088 | 0.234  |
| PCHAS_113540 | -0.446 | -0.201 | 0.0335 | -0.229 | -0.098 | 0.064  | -0.366 | 0.0716 | -0.127 | 0.8635 | 0.8358 | 0.1128 |
| PCHAS_082850 | 0.0202 | 0.012  | 0.5477 | 0.3038 | 0.0442 | 0.5561 | 0.6273 | -0.043 | 0.0797 | 0.0653 | 0.6671 | 0.0604 |
| PCHAS_143590 | 0.6733 | 0.3049 | -0.012 | -0.083 | -0.146 | -0.178 | -0.338 | -0.352 | -0.349 | -0.014 | 0.2453 | 0.059  |
| PCHAS_041600 | -0.691 | -0.372 | -0.343 | -0.547 | -0.067 | -0.414 | 0.5112 | -0.135 | -0.226 | 1.0439 | 0.1484 | 0.8103 |

|              |        |        |        |        |        |        |        |        |        |        |        |        |
|--------------|--------|--------|--------|--------|--------|--------|--------|--------|--------|--------|--------|--------|
| PCHAS_124520 | 0.2975 | 0.407  | 0.773  | 0.4246 | -0.002 | 0.0539 | 0.136  | -0.054 | -0.014 | -0.82  | -0.049 | -0.453 |
| PCHAS_061050 | 0.0947 | 0.6974 | 0.8991 | 0.2509 | 0.097  | -0.118 | 0.0145 | -0.346 | -0.105 | -1.729 | -0.615 | -1.023 |
| PCHAS_131970 | -1.37  | -0.332 | 0.1553 | 0.1205 | 0.3719 | 0.1396 | 0.4727 | 0.2035 | 0.2668 | -0.866 | -0.453 | -0.698 |
| PCHAS_090310 | -0.204 | 0.159  | 0.4968 | 0.184  | 0.2323 | -0.184 | 1.0692 | -0.314 | 0.012  | -0.836 | -0.328 | -0.559 |
| PCHAS_103800 | 0.7323 | 0.3218 | -0.303 | 0.4868 | -0.45  | 0.1505 | 0.3884 | -0.443 | 0.0514 | -0.472 | -0.152 | -0.161 |
| PCHAS_092380 | 1.1158 | 0.2661 | 0.573  | 0.3451 | 0.1879 | -0.369 | -0.165 | -0.175 | -0.289 | -1.01  | -0.425 | -0.693 |
| PCHAS_051420 | 0.663  | 0.0959 | -0.15  | 0.2186 | -0.108 | 0.1833 | 0.509  | -0.041 | 0.1261 | -0.438 | -0.265 | -0.233 |
| PCHAS_040940 | -0.439 | -0.776 | -0.825 | -0.606 | -1.37  | -3E-04 | -0.587 | 0.0081 | 0.0179 | 0.3165 | 1.6247 | 0.1337 |
| PCHAS_145390 | -0.758 | -0.092 | 0.0896 | 0.3004 | 0.2697 | 0.3848 | 0.8904 | 0.4004 | 0.418  | -0.016 | -0.289 | 0.126  |
| PCHAS_123860 | -0.184 | -0.191 | -0.267 | -0.166 | -0.287 | -0.004 | 0.3253 | -0.191 | -0.037 | -0.506 | -0.602 | -0.557 |
| PCHAS_131920 | -0.032 | 0.0321 | 0.4405 | 0.1246 | 0.045  | 0.1719 | -0.287 | -0.388 | -0.079 | -0.616 | 0.0846 | -0.663 |
| PCHAS_091010 | -0.222 | -0.091 | 0.0216 | -0.053 | 0.1185 | -0.05  | 0.3597 | 0.2382 | 0.0247 | -0.564 | -0.293 | -0.741 |
| PCHAS_080790 | -0.125 | 0.0298 | 0.091  | 0.1714 | -0.041 | -0.141 | -0.104 | 0.0701 | -0.074 | -0.438 | -0.121 | -0.564 |
| PCHAS_143540 | 0.5072 | 0.2125 | 0.3296 | 0.1441 | 0.1476 | -0.368 | -0.43  | -0.698 | -0.36  | -1.589 | -0.528 | -1.028 |
| PCHAS_136420 | -1.126 | -0.232 | -0.883 | 0.6961 | -0.61  | 0.3028 | 0.6473 | 0.4983 | -0.111 | -0.126 | 0.4398 | 1.1535 |
| PCHAS_141970 | -0.133 | -1.347 | -0.793 | -0.78  | 0.1095 | 0.653  | 0.4937 | 0.6579 | 0.64   | 1.3061 | 0.0477 | 1.0373 |
| PCHAS_123920 | 0.0477 | 0.2275 | 0.0875 | -0.138 | 0.1171 | -0.298 | -0.027 | -0.58  | -0.277 | -0.957 | -1.064 | -0.886 |
| PCHAS_143970 | 0.262  | -0.818 | -1.319 | -1.161 | -0.377 | 0.6524 | -1.015 | -1.136 | 0.7307 | 1.109  | 0.8597 | 1.3142 |
| PCHAS_083320 | -0.421 | -0.755 | -0.379 | -0.963 | 0.1114 | 0.4408 | 0.4131 | 0.3268 | 0.3771 | 0.4856 | 0.4141 | 0.2544 |
| PCHAS_050370 | 0.234  | 0.1984 | 0.2709 | 0.75   | 0.1381 | -0.212 | 0.1177 | -0.069 | -0.224 | -0.425 | 0.0983 | -0.274 |
| PCHAS_072200 | 0.583  | 0.2175 | 0.2592 | -0.261 | -0.177 | -0.324 | -0.746 | -0.066 | -0.367 | -0.143 | 0.7515 | -0.071 |
| PCHAS_000990 | 0.2487 | 0.2493 | 0.5647 | -0.077 | -0.024 | -0.268 | -0.335 | -0.346 | -0.49  | -0.538 | -1.788 | -0.305 |
| PCHAS_080970 | 0.0552 | -0.653 | -0.201 | -1.218 | -0.142 | 0.2099 | 0.6504 | 0.312  | 0.2246 | 1.2911 | 1.3382 | 0.7035 |
| PCHAS_121710 | -0.126 | -0.062 | 0.2321 | 0.1593 | 0.0548 | -0.171 | -0.096 | 0.1818 | -0.201 | -0.766 | -0.418 | -0.352 |
| PCHAS_071750 | 0.2856 | 0.7333 | 0.1488 | 0.1548 | 0.3074 | 0.1236 | -0.302 | 0.1208 | 0.1894 | 0.3808 | 1.8051 | 0.8874 |
| PCHAS_136690 | 0.1537 | -0.028 | 0.0583 | -0.032 | -0.165 | -0.077 | -0.297 | 0.0261 | -0.08  | 0.1178 | -0.349 | 0.1139 |
| PCHAS_090580 | -1.297 | -1.386 | -1.221 | -0.632 | -0.117 | 0.4432 | 0.513  | 1.0398 | 0.4234 | 0.9588 | 0.992  | 0.6928 |
| PCHAS_112770 | 0.2205 | 0.2198 | 0.3376 | 0.2923 | -0.014 | -0.426 | -0.516 | -1.217 | -0.45  | -1.794 | -1.154 | -1.427 |
| PCHAS_134730 | 0.1886 | 0.3947 | 0.5562 | -0.265 | 0.0688 | -0.383 | 0.503  | 0.2445 | -0.349 | 0.1365 | 0.8934 | -0.499 |
| PCHAS_141030 | -0.246 | -0.247 | 0.2351 | -0.269 | -0.158 | -0.166 | 0.1297 | 0.0987 | -0.533 | 0.0289 | 0.5295 | -0.9   |
| PCHAS_110230 | -0.421 | -0.628 | 0.4122 | 0.2132 | 0.1628 | 0.2593 | -0.973 | -0.138 | -0.3   | -0.457 | -0.129 | -0.622 |
| PCHAS_041920 | -0.365 | -0.302 | 0.0978 | -0.398 | -0.093 | -0.217 | -0.364 | 0.1895 | -0.14  | -0.019 | -0.038 | -0.093 |
| PCHAS_061900 | -0.401 | -0.67  | 0.4443 | 0.3113 | 0.0421 | 0.6368 | -1.571 | -0.384 | -0.29  | -0.489 | -0.08  | -0.335 |
| PCHAS_102370 | 0.5597 | 0.2996 | 0.1732 | -0.3   | -0.199 | -0.512 | 0.0491 | 0.007  | -0.211 | 0.1017 | 0.4846 | 0.0346 |
| PCHAS_020570 | 0.26   | -0.575 | -0.29  | -0.621 | 0.1395 | 0.1192 | 0.6585 | 0.7292 | 0.1675 | 0.3443 | 1.2332 | 0.503  |
| PCHAS_092510 | 0.7767 | 0.505  | 0.2105 | -0.174 | -0.014 | -0.217 | -0.185 | -0.613 | -0.205 | -0.568 | 0.0266 | -0.495 |
| PCHAS_121610 | 0.0725 | 0.4911 | 0.7342 | 0.3001 | 0.007  | -0.161 | -0.603 | -0.617 | -0.257 | -0.601 | -0.997 | -0.588 |
| PCHAS_010610 | 0.5358 | 0.5547 | 0.6367 | 0.1444 | 0.322  | 0.1701 | 0.2795 | -0.367 | 0.088  | -1.305 | -0.201 | -0.96  |
| PCHAS_092790 | -0.687 | 0.0344 | 0.1766 | 0.3796 | 0.1748 | 0.2226 | 0.6857 | 0.3288 | 0.2928 | -0.117 | -0.818 | -0.251 |
| PCHAS_110500 | 0.3395 | 0.2296 | 0.3224 | 0.7668 | -0.017 | 0.6389 | -0.176 | -0.284 | -0.024 | -0.765 | -0.528 | -0.79  |
| PCHAS_082700 | 0.632  | 0.7927 | 0.7346 | -0.506 | -0.156 | -0.756 | -0.856 | -1.29  | -1.136 | -1.003 | -0.381 | -1.065 |
| PCHAS_090620 | -0.242 | 1.2183 | 0.8277 | -0.02  | 0.0686 | -0.202 | -0.738 | -0.409 | -0.139 | -0.758 | -0.493 | -0.48  |
| PCHAS_101440 | -0.053 | 0.234  | 0.4274 | 0.4489 | 0.0299 | 0.6688 | 0.3425 | -0.18  | 0.4338 | -0.85  | -0.255 | -0.507 |
| PCHAS_040890 | 0.1844 | 0.5119 | 0.3517 | 0.5255 | 0.1757 | 0.5923 | -0.193 | -0.131 | -0.026 | -0.37  | -0.42  | -0.236 |
| PCHAS_061090 | 0.4896 | 0.6249 | 0.329  | 0.3015 | 0.0857 | -0.35  | -0.453 | -0.472 | -0.397 | -0.582 | -0.499 | -0.078 |
| PCHAS_143560 | 0.2095 | -1.009 | -1.186 | -0.572 | -0.461 | -0.465 | -0.468 | -0.536 | -0.419 | 0.4292 | 2.804  | 0.4645 |
| PCHAS_081770 | -0.3   | 0.4137 | 1.0544 | 0.4046 | 0.1455 | 0.3842 | -0.137 | -0.615 | -0.025 | -0.862 | -0.55  | -0.579 |
| PCHAS_123990 | 0.6788 | 0.4712 | 0.6699 | -0.206 | -0.012 | -0.389 | 0.4014 | -0.008 | -0.362 | 0.063  | 0.5057 | -0.174 |
| PCHAS_121660 | -0.26  | 0.3007 | 0.6036 | 0.2276 | 0.2377 | -0.116 | 0.22   | -0.238 | -0.299 | -0.748 | 0.0933 | -0.315 |
| PCHAS_113170 | -0.373 | 0.6344 | 0.2799 | 0.447  | -0.039 | 0.1041 | -0.075 | -0.358 | 0.1015 | -0.816 | -0.926 | -0.413 |



|              |        |        |        |        |        |        |        |        |        |        |        |        |
|--------------|--------|--------|--------|--------|--------|--------|--------|--------|--------|--------|--------|--------|
| PCHAS_070810 | 0.2338 | 0.4806 | 0.6593 | 0.3342 | 0.0495 | -0.188 | -1.112 | -0.801 | -0.252 | -0.905 | -1.489 | -0.852 |
| PCHAS_050700 | 0.0724 | -1.207 | 0.4977 | -0.443 | 0.1016 | 0.1597 | -0.146 | -0.412 | 0.0781 | 0.2251 | 0.5005 | 0.1826 |
| PCHAS_081700 | -1.072 | -0.741 | -0.63  | -0.491 | 0.1497 | 0.2286 | 0.5027 | 0.6362 | 0.206  | 0.2888 | 0.256  | 0.2041 |
| PCHAS_113820 | -0.411 | 0.1096 | 0.1724 | 0.8549 | 0.3235 | 0.5929 | -0.652 | -0.411 | 0.4834 | -1.216 | -1.712 | -0.917 |
| PCHAS_082790 | 1.1295 | 0.0142 | -1.218 | 0.283  | -0.287 | 1.1392 | 0.2454 | 0.3194 | 0.8999 | 0.0031 | -0.19  | 0.5097 |
| PCHAS_051640 | -0.427 | 0.1308 | 0.1158 | -0.141 | 0.0105 | -0.25  | 0.2819 | 0.4202 | -0.166 | 0.0129 | 0.0495 | 0.0014 |
| PCHAS_135140 | 0.3944 | 0.3404 | -0.328 | 0.0889 | -0.209 | -0.032 | -0.372 | -0.85  | -0.455 | 0.0006 | 0.396  | -0.258 |
| PCHAS_072660 | 0.3384 | 0.1215 | 0.297  | -0.045 | 0.0871 | -0.34  | -0.153 | -0.035 | -0.284 | -0.308 | 0.2847 | -0.428 |
| PCHAS_144250 | 0.9654 | 0.3534 | 0.2293 | 0.342  | 0.0723 | 0.047  | -0.645 | -0.188 | 0.0835 | -0.365 | -0.527 | -0.25  |
| PCHAS_136300 | -0.331 | -0.573 | -0.049 | -0.129 | 0.058  | 0.0315 | 0.847  | 0.3743 | -0.096 | -0.063 | 0.4206 | -0.134 |
| PCHAS_123150 | 0.6198 | 0.3527 | 0.6925 | 0.3849 | 0.1583 | -1.01  | -0.395 | -0.653 | -0.556 | -1.643 | -1.338 | -0.82  |
| PCHAS_123370 | -0.232 | 0.2473 | 0.1428 | 0.2817 | 0.0557 | 0.1085 | -0.214 | -0.101 | -0.105 | -0.537 | -2.4   | -0.203 |
| PCHAS_120390 | 0.159  | 0.2493 | 0.6187 | 0.4483 | 0.3036 | 0.0872 | 0.5316 | 0.2012 | -0.002 | -0.885 | 0.2927 | -0.274 |
| PCHAS_090690 | 0.4576 | 0.3998 | 0.0536 | 0.2466 | -0.037 | -0.01  | -0.308 | -0.567 | -0.16  | -0.569 | -0.296 | -0.401 |
| PCHAS_071300 | 0.247  | 0.2431 | -0.311 | -0.378 | -0.179 | -0.41  | -0.235 | 0.1005 | -0.264 | 0.5967 | 0.6996 | 0.4772 |
| PCHAS_134480 | -0.035 | 0.1671 | 0.5397 | 0.1143 | 0.2256 | -0.191 | 0.5268 | 0.1095 | -0.058 | -0.625 | 0.1502 | -0.644 |
| PCHAS_122630 | -0.638 | -0.586 | -0.116 | -0.907 | -0.064 | 0.156  | 0.6446 | 0.7469 | 0.211  | 0.6024 | 0.2491 | 0.0245 |
| PCHAS_142070 | -0.998 | -0.802 | -0.455 | -0.607 | -0.188 | -0.03  | 0.6854 | 0.7925 | -0.006 | 0.6056 | 0.3645 | 0.6226 |
| PCHAS_020020 | -0.604 | 0.0627 | 0.4809 | 0.4447 | 0.2054 | 0.0478 | -0.29  | -0.926 | -0.181 | -2.228 | -1.207 | -1.831 |
| PCHAS_091990 | -0.158 | -1.191 | -0.917 | -0.661 | 0.0943 | 0.6674 | -0.17  | 0.8466 | 0.6138 | 0.8556 | 0.2956 | 0.9299 |
| PCHAS_141690 | 0.9153 | 0.51   | 0.7543 | -0.078 | 0.1717 | -0.461 | 0.0183 | -0.646 | -0.615 | -0.495 | -0.126 | -0.239 |
| PCHAS_102900 | 0.6046 | -0.21  | -0.002 | -0.271 | 0.0486 | 0.2456 | -0.104 | -0.078 | 0.1701 | 0.9354 | 0.4884 | 0.529  |
| PCHAS_101280 | -0.462 | -0.956 | -0.958 | -0.499 | -0.105 | 0.1995 | -0.667 | -1.021 | -0.341 | 0.7729 | 2.1936 | 0.1703 |
| PCHAS_092260 | 0.4211 | 0.3025 | -0.264 | -0.395 | -0.494 | -0.02  | -0.186 | 0.5142 | -0.112 | 0.2812 | 1.0601 | 0.2205 |
| PCHAS_134100 | -0.408 | -1.397 | -1.009 | -1.21  | -0.105 | 0.3483 | 0.7467 | 0.5857 | 0.2837 | 0.7553 | 0.8071 | 1.1068 |
| PCHAS_011200 | 0.2533 | -0.184 | -0.071 | -0.225 | -0.15  | -0.154 | 0.0174 | 0.1963 | -0.138 | 0.6758 | 0.7639 | 0.5494 |
| PCHAS_080830 | -0.068 | 0.0649 | -0.13  | -0.239 | -0.076 | 0.1256 | -0.252 | -0.161 | -0.226 | -0.438 | -0.309 | -0.466 |
| PCHAS_132390 | -0.428 | -0.078 | 0.0919 | 0.0615 | 0.2319 | -0.035 | 0.5679 | 0.4336 | 0.105  | 0.1642 | 0.3692 | -0.036 |
| PCHAS_060500 | -0.47  | -0.164 | 0.0034 | -0.003 | 0.2212 | 0.2218 | 0.705  | 0.3043 | 0.0895 | -0.007 | 0.0656 | -0.136 |
| PCHAS_140800 | -0.121 | -0.11  | -0.09  | -0.014 | 0.0004 | 0.3149 | 0.3215 | -0.164 | 0.2228 | 0.272  | 0.023  | 0.3698 |
| PCHAS_020370 | 0.1404 | -0.094 | 0.1179 | 0.0463 | 0.305  | -0.295 | 0.6624 | 0.1356 | -0.303 | -1.456 | -0.97  | -1.001 |
| PCHAS_131910 | 0.4359 | 0.2159 | 0.687  | -0.123 | -0.245 | -0.632 | -0.233 | -0.158 | -0.353 | -0.587 | 0.2439 | -0.442 |
| PCHAS_050560 | 0.4626 | 0.6181 | 0.3941 | -0.244 | -0.275 | 0.004  | -0.559 | -0.12  | -0.416 | 0.0175 | 0.675  | 0.2263 |
| PCHAS_133640 | -0.008 | 0.5256 | 0.182  | 0.1223 | 0.062  | -0.167 | -1.164 | -0.422 | -0.407 | -0.614 | -2.173 | -0.593 |
| PCHAS_136530 | 0.8132 | 0.1485 | 0.6227 | 0.1326 | 0.2754 | -0.443 | 0.1893 | 0.1377 | -0.332 | -0.533 | 0.2804 | -0.199 |
| PCHAS_040930 | -0.18  | 0.3796 | -0.346 | 0.3132 | 0.1148 | 0.2876 | -0.597 | -1.016 | -0.046 | -0.23  | -1.128 | -0.714 |
| PCHAS_136700 | -0.391 | -1.393 | -0.559 | -1.111 | -0.273 | 0.0442 | 0.6729 | 0.6079 | -0.084 | 0.5935 | 0.657  | 0.4006 |
| PCHAS_093030 | 0.3199 | -0.178 | -0.157 | -0.23  | -0.031 | -0.075 | 0.8712 | 0.5748 | -0.135 | 0.2316 | 0.4519 | -0.097 |
| PCHAS_113380 | 0.3115 | -0.046 | 0.206  | 0.0811 | 0.136  | 0.0976 | -0.203 | 0.1134 | 0.1177 | 0.5714 | -0.445 | 0.1664 |
| PCHAS_102430 | 0.2709 | 0.3109 | 0.3896 | 0.3664 | 0.3148 | -0.025 | -0.073 | -0.502 | -0.099 | -1.1   | -0.982 | -0.822 |
| PCHAS_060590 | -0.482 | 0.2105 | 0.0475 | 0.4579 | 0.1434 | 0.799  | 1.7332 | -0.338 | 0.2542 | -0.735 | -0.719 | -0.156 |
| PCHAS_050570 | 0.1781 | 0.4452 | 0.5465 | -0.051 | 0.0423 | -0.157 | 0.0092 | 0.2346 | -0.295 | 0.0851 | 0.5204 | 0.118  |
| PCHAS_093740 | -1.141 | -0.833 | -1.916 | -0.574 | -0.384 | 0.6192 | 0.3945 | 0.3227 | 0.1437 | -0.122 | 0.0175 | -0.059 |
| PCHAS_041720 | 0.7686 | 0.2705 | 0.1785 | -0.122 | -0.273 | -0.213 | 0.0807 | -0.221 | -0.248 | 0.1529 | -0.015 | 0.1633 |
| PCHAS_112120 | 0.2141 | 0.5246 | 0.1475 | 0.1659 | 0.1362 | -0.219 | -0.61  | -0.418 | -0.151 | -1.625 | -1.34  | -0.577 |
| PCHAS_144880 | -0.895 | -1.68  | -1.402 | -0.387 | -0.447 | -0.205 | -0.674 | -0.176 | -0.011 | 0.4946 | 0.7974 | 0.8084 |
| PCHAS_061210 | 0.4205 | 0.2529 | -0.152 | -0.013 | -0.036 | -0.33  | -0.362 | -0.772 | -0.252 | -1.029 | -1.095 | -0.967 |
| PCHAS_121240 | -0.395 | -0.578 | -0.726 | -0.214 | 0.2418 | 0.2296 | -0.034 | 0.1939 | 0.0728 | 0.075  | -0.034 | 0.0991 |
| PCHAS_142550 | 0.234  | 0.417  | 0.6517 | -0.183 | 0.0814 | -0.217 | 0.6162 | 0.394  | -0.042 | -0.843 | 0.5268 | -0.245 |
| PCHAS_110800 | -0.029 | 0.1454 | 0.0199 | 0.3417 | 0.2651 | 0.3004 | -0.456 | -0.168 | 0.3134 | -0.249 | -0.924 | -0.385 |

|              |        |        |        |        |        |        |        |        |        |        |        |        |
|--------------|--------|--------|--------|--------|--------|--------|--------|--------|--------|--------|--------|--------|
| PCHAS_140860 | 0.2996 | -0.131 | -0.622 | 0.9115 | -0.441 | 0.9548 | 0.5419 | -0.465 | 1.1081 | -0.616 | 0.0685 | -0.02  |
| PCHAS_091760 | -0.812 | -0.403 | -0.236 | -0.798 | -0.269 | 0.2282 | -0.135 | 0.3226 | 0.1192 | 0.183  | 0.1616 | 0.4058 |
| PCHAS_140460 | -0.076 | -0.684 | -0.296 | -0.716 | -0.007 | 0.0809 | 0.5901 | 0.8237 | 0.0761 | 1.0777 | 0.672  | 0.6835 |
| PCHAS_144520 | -0.076 | -1.054 | -0.763 | -0.672 | -0.197 | 0.5017 | 0.3659 | 0.4794 | 0.3757 | 1.0507 | 0.6229 | 1.1696 |
| PCHAS_142620 | -0.824 | -0.046 | 0.3138 | 0.2879 | 0.4522 | 0.8842 | 0.7906 | 0.1297 | 0.5933 | -1.334 | -0.751 | -0.89  |
| PCHAS_050920 | 0.0694 | 0.2339 | 0.2744 | 0.5298 | 0.2627 | -0.563 | -0.211 | -0.133 | -0.29  | -1.204 | -0.466 | -0.276 |
| PCHAS_042070 | -0.547 | 0.052  | -0.013 | 0.2321 | 0.0214 | 0.0817 | -0.198 | 0.3585 | 0.0295 | 0.0142 | -0.41  | -0.347 |
| PCHAS_010720 | -1.644 | -1.11  | -1.191 | -0.94  | -0.491 | 0.5984 | 0.6606 | 1.1836 | 0.3374 | 0.6277 | 0.4611 | 0.315  |
| PCHAS_144810 | 0.1285 | -0.25  | 0.2333 | -0.586 | -0.231 | -0.268 | -0.226 | 0.1077 | -0.265 | 0.9152 | 1.5165 | 1.2506 |
| PCHAS_135090 | 1.2231 | -0.104 | -0.888 | 0.3098 | 0.1758 | 0.3168 | 1.2465 | 0.2308 | 0.3065 | 0.8423 | 0.3409 | 0.2111 |
| PCHAS_102530 | -0.741 | -0.238 | 0.1886 | 0.2154 | 0.0244 | 0.2893 | 0.2864 | 0.5912 | 0.2159 | 0.2015 | 0.2856 | 0.0336 |
| PCHAS_050230 | -0.943 | -0.486 | -0.354 | 0.0519 | 0.3277 | 0.4028 | 0.8386 | 0.473  | 0.5216 | -0.14  | -0.288 | -0.116 |
| PCHAS_122130 | -0.47  | -0.361 | -0.302 | -0.344 | 0.0055 | 0.1085 | 0.0508 | 0.2384 | 0.049  | 0.5308 | 0.3324 | 0.4163 |
| PCHAS_060840 | 0.8623 | 0.5675 | 0.2773 | 0.1648 | 0.0312 | -0.434 | -0.772 | -0.916 | -0.5   | -1.251 | -1.069 | -0.958 |
| PCHAS_145100 | -0.09  | 0.1348 | 0.483  | 0.1825 | 0.0438 | -0.065 | -0.34  | -0.156 | -0.022 | 0.2912 | -0.836 | 0.1144 |
| PCHAS_041550 | 0.2008 | -0.095 | -0.265 | 0.5418 | -0.083 | -0.285 | 1.6384 | -0.288 | -0.208 | -0.395 | -0.244 | -0.185 |
| PCHAS_111550 | -0.311 | -0.243 | -0.166 | -0.081 | -0.105 | -0.171 | 0.0449 | -0.054 | -0.249 | 0.2511 | 0.5435 | -0.006 |
| PCHAS_142060 | -0.3   | 0.012  | 0.1243 | 0.058  | -0.155 | 0.084  | 0.2967 | 0.1742 | 0.0496 | -0.383 | -0.128 | -0.559 |
| PCHAS_141380 | 0.1585 | -0.552 | -0.305 | -0.489 | -0.176 | -0.08  | -0.272 | -0.054 | -0.076 | 1.3693 | 0.9504 | 1.0128 |
| PCHAS_082750 | -0.361 | -0.761 | -0.262 | -0.623 | -0.13  | -0.677 | 0.7935 | 0.5124 | -0.667 | -0.007 | 0.5205 | -0.114 |
| PCHAS_135120 | -0.162 | 0.1486 | 0.0973 | 0.2543 | 0.1554 | -0.029 | -0.279 | -0.576 | -0.131 | -1.548 | -1.447 | -0.671 |
| PCHAS_051170 | -0.455 | 0.1614 | 0.9941 | 0.1055 | 0.1649 | -0.222 | -0.224 | 0.2444 | 0.1151 | -0.208 | 0.3103 | -0.342 |
| PCHAS_060300 | -1.235 | -0.933 | -0.826 | -0.325 | 0.0935 | 0.1469 | 0.6007 | 0.7592 | 0.2197 | 0.6355 | 0.1457 | 0.6554 |
| PCHAS_083710 | -0.885 | -0.776 | -0.841 | -0.913 | -0.483 | -0.009 | 0.1958 | 0.5299 | -0.047 | 0.4917 | 0.0701 | 0.6154 |
| PCHAS_134340 | -0.084 | -0.204 | 0.2023 | -0.397 | -0.048 | -0.136 | 1.0274 | 0.3568 | -0.073 | -0.538 | 0.1064 | -0.883 |
| PCHAS_050720 | -0.965 | -0.449 | -0.455 | -0.469 | 0.0249 | -0.026 | 0.5703 | 0.7126 | 0.0787 | 0.4719 | 0.4681 | 0.3078 |
| PCHAS_083580 | 0.066  | -0.016 | -0.16  | -0.09  | -0.005 | 0.0844 | 0.1771 | 0.3713 | 0.0067 | 0.4304 | 0.0932 | 0.4137 |
| PCHAS_112450 | -0.415 | 0.197  | 0.2547 | -0.3   | -0.437 | -0.45  | 0.4848 | -0.255 | -0.588 | -0.825 | -0.572 | -0.692 |
| PCHAS_093010 | 0.4816 | 0.6348 | 0.5466 | 0.4191 | 0.0909 | -0.121 | -0.435 | -0.118 | -0.126 | -0.542 | -0.627 | -0.055 |
| PCHAS_145870 | 0.0349 | 0.122  | 0.0071 | 0.2193 | -0.031 | 0.1665 | -0.443 | -0.012 | -0.121 | -0.193 | 0.0543 | -0.29  |
| PCHAS_071560 | -0.133 | 0.3122 | 0.4959 | 0.3011 | -0.326 | -0.315 | -0.288 | -0.56  | -0.207 | -1.673 | -2.599 | -1.156 |
| PCHAS_141730 | -0.094 | #####  | -0.131 | 0.0279 | -0.038 | 0.5276 | -0.075 | 0.3098 | 0.3819 | 0.7345 | 0.4014 | 0.4929 |
| PCHAS_031140 | 0.2778 | 0.4398 | 0.4417 | -0.03  | -0.105 | -0.261 | -0.32  | 0.1278 | -0.175 | 0.0712 | -0.191 | -0.004 |
| PCHAS_051820 | 0.0411 | 0.1182 | 0.1646 | -0.116 | -0.028 | -0.387 | -0.49  | -0.256 | -0.268 | 0.011  | -0.113 | 0.1739 |
| PCHAS_132230 | 0.821  | -0.294 | -0.25  | -1.265 | -0.356 | -0.121 | 0.3329 | 0.078  | -0.433 | 0.6678 | 2.6053 | 0.7358 |
| PCHAS_080640 | 0.5573 | 0.2173 | 0.4081 | 0.2052 | -0.092 | -0.353 | -0.466 | -0.66  | -0.383 | -0.839 | -0.54  | -0.735 |
| PCHAS_090340 | -0.073 | 0.2027 | 0.0237 | -0.123 | -0.195 | -0.305 | 0.6601 | -0.32  | -0.253 | -0.781 | -0.766 | -0.466 |
| PCHAS_112950 | 0.1874 | 0.1664 | -0.047 | 0.5187 | 0.149  | 0.0798 | 0.3404 | 0.1506 | 0.0783 | -0.149 | 0.2603 | -0.167 |
| PCHAS_061590 | -0.659 | 0.0207 | 0.3381 | 0.4851 | 0.316  | 0.3453 | -0.79  | -0.215 | 0.1041 | -0.143 | 0.408  | -0.255 |
| PCHAS_093310 | -0.624 | -0.375 | 0.6893 | 0.2132 | 0.1874 | 1.1976 | 0.2451 | 0.1275 | 0.4385 | 0.4593 | 0.4135 | 0.3578 |
| PCHAS_091650 | 0.4632 | 0.6718 | 0.7927 | 0.1379 | 0.3031 | -0.118 | 0.1528 | -0.088 | -0.192 | -0.836 | -0.49  | -0.585 |
| PCHAS_010970 | -1.015 | -0.437 | -0.195 | 0.1039 | 0.1194 | 0.1794 | 0.4938 | 0.2833 | 0.2893 | -0.584 | -0.797 | -0.703 |
| PCHAS_092820 | -1.441 | -0.81  | -0.467 | -0.111 | 0.0041 | 0.3373 | 0.2758 | 0.3725 | 0.2584 | -0.016 | -0.411 | -0.176 |
| PCHAS_143550 | 0.507  | -0.045 | 0.2465 | -0.248 | -0.116 | -0.315 | 0.9182 | 0.0282 | -0.322 | -0.614 | -0.237 | -0.501 |
| PCHAS_124010 | 0.6729 | 0.9383 | 0.6808 | 0.1505 | -0.165 | -0.293 | -0.733 | -0.834 | -0.458 | -1.518 | -0.576 | -0.686 |
| PCHAS_141680 | 0.3358 | 0.2418 | 0.0187 | 0.273  | -0.014 | 0.0267 | -0.567 | -0.572 | -0.011 | -1.107 | -0.993 | -0.959 |
| PCHAS_060670 | 0.5527 | -0.443 | 0.0088 | -0.158 | 0.2538 | 0.3736 | -0.573 | -0.843 | 0.6225 | 0.3942 | -0.123 | 0.7322 |
| PCHAS_020500 | 0.514  | 0.5446 | 0.4641 | 0.3307 | -0.105 | -0.522 | -0.542 | -0.861 | -0.622 | -1.502 | -0.705 | -0.815 |
| PCHAS_130550 | -0.082 | 0.0477 | 0.2433 | 0.195  | 0.1985 | -0.139 | -0.273 | -0.218 | -0.022 | -3E-04 | 0.2062 | -0.12  |
| PCHAS_143840 | -0.196 | -0.29  | 0.0216 | -0.253 | 0.0846 | -0.038 | 0.4817 | 0.5953 | -0.122 | 0.7666 | 0.785  | 0.304  |

|              |        |        |        |        |        |        |        |        |        |        |        |        |
|--------------|--------|--------|--------|--------|--------|--------|--------|--------|--------|--------|--------|--------|
| PCHAS_130570 | 0.1482 | -0.118 | 0.5279 | -0.087 | 0.0888 | -0.095 | 0.2383 | 0.0595 | -0.188 | -0.587 | -0.163 | -0.697 |
| PCHAS_103170 | -0.317 | 0.2914 | 0.5748 | 0.3238 | -0.053 | -0.496 | 0.5122 | -0.419 | -0.528 | -1.548 | -2.024 | -0.837 |
| PCHAS_050990 | -0.403 | 0.2184 | 0.6283 | 0.3501 | 0.5882 | -0.054 | 0.4842 | -0.345 | 0.055  | -1.432 | -0.773 | -1.128 |
| PCHAS_123710 | 0.4205 | 0.276  | -0.028 | 0.3361 | 0.2219 | 0.1494 | 0.2403 | -0.422 | 0.1934 | -0.013 | -0.067 | -0.113 |
| PCHAS_101880 | 0.3067 | 0.6017 | 0.5715 | 0.5403 | 0.0461 | 0.0749 | -0.244 | 0.2872 | 0.1921 | -0.739 | -1.871 | -0.731 |
| PCHAS_090140 | 0.4936 | 1.3073 | 0.2765 | 0.1047 | 0.2095 | -0.402 | 0.0495 | -0.985 | -0.253 | -0.997 | -1.804 | -0.301 |
| PCHAS_132960 | -1.774 | -1.179 | -0.997 | -0.272 | 0.0613 | 0.2712 | 0.5121 | 0.8428 | 0.44   | 0.486  | 0.4128 | 0.3279 |
| PCHAS_142740 | -0.607 | -0.382 | 0.1584 | 0.4488 | 0.244  | 0.4722 | -0.338 | 0.0216 | 0.36   | -0.593 | -0.738 | -0.463 |
| PCHAS_093280 | 0.1633 | 0.066  | 0.2713 | 0.1284 | -0.015 | -0.239 | -0.073 | -0.137 | -0.362 | -0.336 | 0.088  | -0.495 |
| PCHAS_121570 | 0.7098 | 0.1182 | 0.6964 | -0.092 | 0.0468 | -0.121 | 0.552  | 0.2146 | -0.282 | -0.537 | -0.263 | -0.463 |
| PCHAS_131860 | -0.321 | 0.0321 | 0.4092 | 0.2993 | 0.2656 | 0.2357 | 0.8425 | 0.1449 | 0.052  | -0.124 | -0.091 | 0.2001 |
| PCHAS_060380 | -0.26  | -0.396 | -0.282 | -0.177 | -0.049 | 0.415  | 0.5999 | 0.5936 | 0.3865 | 1.1233 | 0.4387 | 0.771  |
| PCHAS_111600 | 0.3311 | -0.135 | 0.483  | -0.131 | 0.0736 | -0.026 | -0.074 | 0.3543 | 0.0819 | 0.3435 | 0.0969 | -0.306 |
| PCHAS_010840 | 0.8851 | 0.693  | 0.7429 | 0.2727 | 0.1547 | -0.23  | 0.8937 | -0.342 | -0.36  | -0.825 | -0.522 | -0.291 |
| PCHAS_103330 | 0.2545 | 0.0442 | 0.1251 | 0.1239 | 0.0506 | 0.0357 | 0.3192 | 0.0166 | -0.046 | -0.453 | -0.315 | -0.252 |
| PCHAS_130540 | -1.244 | -0.642 | -0.825 | -0.365 | 0.029  | 0.3579 | 0.551  | 0.6149 | 0.3846 | 0.3415 | -0.008 | 0.0226 |
| PCHAS_041200 | 0.1074 | 0.4019 | -0.723 | 0.6464 | -0.766 | 0.7393 | 0.6565 | 0.498  | 0.6394 | -0.274 | 0.5763 | 0.2977 |
| PCHAS_145060 | -0.359 | 0.3938 | 0.2552 | -0.144 | -0.169 | -0.537 | 0.0236 | -0.175 | -0.638 | -0.465 | -0.299 | -0.328 |
| PCHAS_072380 | -0.181 | -0.287 | 0.4661 | 0.0834 | 0.0181 | -0.039 | 0.0908 | -0.225 | -0.264 | -0.616 | -0.185 | -0.453 |
| PCHAS_146840 | 0.1256 | 0.0954 | 0.0962 | 0.1493 | 0      | -0.346 | 0.0977 | -0.289 | -0.297 | -1.41  | -0.756 | -0.949 |
| PCHAS_031520 | 0.6357 | 0.2224 | 0.1951 | 0.0024 | -0.067 | -0.063 | 0.2863 | 0.1111 | -0.161 | 0.0172 | -0.592 | 0.0844 |
| PCHAS_000890 | 0.468  | 0.2866 | -0.324 | -0.216 | -0.306 | -0.594 | -0.33  | -0.225 | -0.63  | -0.37  | 1.0844 | 0.0959 |
| PCHAS_143810 | -0.623 | -0.652 | -0.562 | -0.565 | 0.0187 | 0.2811 | 0.1471 | 0.2801 | 0.1932 | 0.4406 | -0.131 | 0.8237 |
| PCHAS_111350 | -0.161 | 0.3972 | 0.0125 | -0.008 | 0.0809 | 0.7317 | -0.335 | 0.223  | 0.6564 | 0.7833 | 0.227  | 0.7087 |
| PCHAS_132370 | 0.4284 | -2E-04 | -0.245 | -0.386 | -0.279 | -0.245 | 0.4494 | 0.2607 | -0.146 | -0.195 | -0.144 | -0.186 |
| PCHAS_144840 | 0.2006 | 0.5618 | 0      | -0.193 | -0.011 | -0.321 | 0.892  | -0.214 | -0.206 | -0.671 | 0.03   | -0.629 |
| PCHAS_130250 | 0.6977 | 0.6443 | 0.3806 | -0.482 | -0.443 | -0.72  | -1.16  | -1.003 | -1.014 | -0.58  | 0.35   | -0.204 |
| PCHAS_114460 | -0.156 | 0.1976 | 0.5848 | -0.103 | 0.0021 | -0.356 | -0.209 | -0.326 | -0.384 | -0.503 | -1.039 | -0.371 |
| PCHAS_143030 | -0.007 | -0.054 | -0.588 | -0.394 | -0.245 | -0.213 | 0.4414 | 0.3431 | -0.172 | 0.5341 | 0.6515 | 0.3341 |
| PCHAS_123190 | -0.192 | -0.314 | -0.102 | 0.0438 | 0.1037 | -0.353 | 0.1056 | 0.0993 | -0.005 | -0.126 | 0.8907 | -0.082 |
| PCHAS_081930 | -1.071 | 0.4994 | -2.507 | -2.361 | -0.705 | 0.0725 | 0.6731 | -0.129 | -0.023 | 1.7665 | 1.6042 | 1.6111 |
| PCHAS_133210 | 0.2513 | 0.4055 | 0.5826 | 0.4483 | 0.1196 | -0.409 | 0.2738 | 0.0969 | -0.338 | -0.584 | -0.526 | -0.55  |
| PCHAS_102510 | 1.1012 | 0.3012 | 0.3343 | 0.201  | 0.1081 | -0.393 | -0.597 | -0.719 | -0.462 | -1.199 | -0.678 | -0.527 |
| PCHAS_030370 | 0.7237 | 0.5477 | -0.204 | 0.0607 | 0.1851 | -0.607 | -0.523 | -1.405 | -0.421 | -1.44  | -1.08  | -0.765 |
| PCHAS_133650 | 0.3388 | -0.205 | -0.347 | -0.259 | -0.127 | 0.2009 | 0.2323 | -0.009 | 0.3156 | -0.351 | -0.144 | -0.281 |
| PCHAS_092780 | -0.002 | 0.1436 | 0.4089 | -0.263 | 0.0821 | -0.075 | 0.0653 | -0.229 | -0.187 | 0.7998 | 0.8304 | 0.4112 |
| PCHAS_111670 | 0.9311 | -0.384 | -0.255 | -0.403 | -0.212 | 0.5772 | -0.406 | -0.601 | 0.2685 | 1.7241 | 1.9851 | 1.5739 |
| PCHAS_010450 | -0.279 | -0.538 | -0.649 | -0.246 | -0.362 | -0.038 | 0.23   | 0.3549 | -0.313 | 0.3979 | 0.239  | 0.3016 |
| PCHAS_133730 | 0.0472 | -0.043 | -0.034 | 0.0525 | -0.097 | 0.1678 | -0.05  | -0.38  | 0.0513 | 0.4389 | 0.7379 | 0.5634 |
| PCHAS_102040 | 0.5146 | 0.483  | 0.2433 | 0.1628 | 0.0057 | -0.355 | -0.075 | 0.0355 | -0.12  | -0.471 | -1.355 | -0.384 |
| PCHAS_060320 | -0.665 | 0.1464 | -0.01  | 0.1543 | 0.1065 | 0.0745 | 0.4303 | 0.2181 | -0.025 | -0.389 | 0.0762 | -0.403 |
| PCHAS_093650 | -0.174 | -0.202 | 0.0085 | -0.065 | -0.053 | -0.296 | 0.5064 | 0.0627 | -0.191 | -0.586 | -0.09  | -0.445 |
| PCHAS_061850 | -0.307 | 0.2035 | 0.364  | 0.3211 | 0.148  | -0.113 | -0.313 | -0.195 | -0.04  | -1.137 | -0.946 | -1.043 |
| PCHAS_144040 | -0.14  | 0.3161 | 0.3847 | 0.447  | 0.3119 | 0.2253 | 0.1085 | 0.1339 | 0.2646 | -0.128 | -0.916 | -0.196 |
| PCHAS_060310 | -0.442 | -0.257 | 0.3152 | 0.0729 | 0.0478 | 0.0506 | 0.1822 | 0.1741 | -0.012 | -0.22  | 1.7514 | -0.037 |
| PCHAS_141170 | -1.071 | -0.526 | -0.36  | -0.276 | 0      | -0.272 | -0.225 | 0.8435 | -0.017 | 0.2409 | 0.4436 | -0.102 |
| PCHAS_123810 | -0.093 | 0.1777 | 0.2599 | -0.065 | 0.1561 | -0.076 | -0.066 | -0.342 | 0.0475 | -0.198 | -1.007 | -0.249 |
| PCHAS_120330 | 0.0108 | 0.3744 | 0.258  | -0.055 | 0.1347 | -0.148 | -0.271 | -0.486 | -0.551 | -0.162 | -0.731 | -0.316 |
| PCHAS_142530 | 0.0731 | 0.0476 | 0.3398 | 0.2504 | 0.1596 | -0.085 | 0.0134 | -0.051 | -0.106 | -0.565 | -0.343 | -0.491 |
| PCHAS_131140 | 0.5696 | -0.038 | -0.718 | -0.997 | -0.664 | -0.861 | -0.626 | -0.308 | -0.656 | 1.0254 | 1.35   | 0.4581 |

|              |        |        |        |        |        |        |        |        |        |        |        |        |
|--------------|--------|--------|--------|--------|--------|--------|--------|--------|--------|--------|--------|--------|
| PCHAS_112000 | -0.475 | 0.1005 | 0.8636 | -0.115 | 0.0571 | -0.486 | -0.06  | -0.528 | -0.381 | -0.686 | -0.147 | -0.735 |
| PCHAS_071580 | 0.6654 | 0.3823 | 0.6708 | -0.088 | 0.1095 | -0.59  | 0.6559 | -0.075 | -0.342 | -0.923 | -0.153 | -0.671 |
| PCHAS_144890 | 0.2084 | 0.6235 | 0.2852 | 0.1722 | -0.072 | -0.286 | -0.172 | -0.21  | -0.268 | -0.863 | -0.457 | -0.336 |
| PCHAS_132400 | -0.682 | -0.711 | -0.687 | -0.663 | -0.053 | 0.285  | 0.0834 | 0.4002 | 0.3338 | 0.7797 | 0.5711 | 0.476  |
| PCHAS_102870 | -0.278 | -0.426 | 0.2652 | -0.191 | -0.056 | -0.393 | 0.3226 | 0.4474 | -0.392 | -0.158 | -0.169 | -0.334 |
| PCHAS_124430 | -0.071 | -0.799 | -0.772 | -0.8   | -0.007 | 0.9388 | -0.033 | 0.5835 | 0.7432 | 0.7969 | 0.2534 | 0.8902 |
| PCHAS_071900 | -0.132 | 0.3876 | 0.0709 | -0.342 | 0.0304 | -0.301 | -0.141 | 0.1863 | -0.29  | 0.0624 | 0.3346 | 0.4139 |
| PCHAS_132330 | -0.32  | -0.587 | -0.331 | -0.844 | -0.09  | 0.032  | -0.028 | 0.1509 | -0.427 | 1.9137 | 1.9391 | 1.3448 |
| PCHAS_093020 | 0.4218 | 0.5044 | 0.3044 | 0.0676 | 0.1304 | 0.1984 | -0.275 | -0.052 | -0.102 | -0.057 | 0.2249 | 0.0845 |
| PCHAS_132830 | 1.2421 | -0.652 | -1.921 | 0.984  | -0.972 | 1.2172 | 0.4806 | 0.4481 | 1.5367 | 0.1264 | 0.7332 | 0.3856 |
| PCHAS_111630 | 0.094  | 0.5231 | 0.3114 | 0.5803 | 0.1679 | 0.245  | -0.695 | -0.45  | 0.1763 | -0.973 | -2.144 | -0.924 |
| PCHAS_071390 | -0.359 | -0.041 | -0.457 | 0.1151 | 0.0148 | 0.6075 | -0.165 | 0.1989 | 0.4213 | 0.8253 | 0.1171 | 0.6003 |
| PCHAS_113980 | 0.3989 | 0.1429 | -0.091 | 0.0386 | -0.189 | -0.256 | -0.289 | -0.251 | -0.216 | -0.634 | -0.547 | -0.253 |
| PCHAS_134330 | -0.4   | -0.196 | -0.191 | -0.255 | -0.04  | 0.0642 | 0.3845 | 0.5806 | -0.159 | 0.6522 | 0.6223 | 0.4676 |
| PCHAS_134890 | -1.179 | -2.395 | -2.04  | -1.564 | -0.84  | 0.404  | 0.7763 | 0.9588 | 0.2417 | 1.0705 | 0.6164 | 0.8266 |
| PCHAS_143440 | -0.656 | 0.1278 | 1.0163 | 0.3099 | 0.2004 | 0.0049 | 1.2829 | -0.52  | 0.1247 | -0.77  | -1.11  | -0.551 |
| PCHAS_100890 | 0.2073 | 0.1719 | 0.1428 | -0.029 | -0.123 | -0.277 | 0.0887 | -0.085 | -0.305 | -0.768 | -0.328 | -0.458 |
| PCHAS_093210 | 0.5491 | 0.5273 | 0.5166 | 0.3708 | -0.106 | -0.186 | -0.583 | 0.169  | -0.064 | 0.8157 | -0.207 | 0.3443 |
| PCHAS_120610 | -0.374 | -0.711 | -0.129 | -0.479 | -0.077 | 0.1582 | 0.7601 | 0.5356 | 0.2697 | 0.5606 | 0.5111 | 0.3397 |
| PCHAS_090510 | 0.7647 | 0.2553 | 0.6821 | 0.339  | 0.1512 | -0.278 | -0.471 | -0.959 | -0.348 | -1.41  | -0.628 | -1.002 |
| PCHAS_011290 | 1.0996 | -0.445 | -0.575 | -0.476 | -0.295 | 0.4022 | -0.574 | -0.393 | 0.3013 | 2.3786 | 1.8538 | 2.0181 |
| PCHAS_131900 | -0.125 | -0.332 | -0.44  | -0.297 | -0.108 | 0.3145 | -0.006 | -0.153 | 0.3791 | 0.9319 | 0.4204 | 1.0284 |
| PCHAS_124330 | -0.072 | -0.574 | -0.076 | -0.076 | -0.268 | 0.0696 | 0.1974 | -0.112 | -0.018 | 0.7576 | 0.4861 | 0.9671 |
| PCHAS_020190 | -0.086 | 0.0896 | 0.3416 | 0.1815 | 0.3068 | -0.149 | 0.7942 | 0.0834 | -0.062 | -0.736 | -0.297 | -0.564 |
| PCHAS_031670 | 0.4759 | 0.4255 | 0.3002 | -0.143 | -0.219 | -0.366 | -0.106 | -0.618 | -0.295 | -0.372 | 0.5503 | -0.217 |
| PCHAS_113470 | -0.01  | 0.3184 | 0.1257 | 0.482  | 0.1773 | 0.0334 | -0.809 | -0.506 | -0.117 | -1.127 | -1.3   | -0.992 |
| PCHAS_131030 | 0.3223 | 0.8282 | 0.7442 | -0.26  | -0.012 | -0.918 | -0.531 | -0.212 | -0.649 | -0.42  | -1.025 | 0.0777 |
| PCHAS_135880 | 0.5602 | -0.212 | 0.7414 | -0.221 | 0.1703 | -0.261 | 0.9794 | 0.3202 | 0.4115 | 0.6379 | 0.7809 | 0.0633 |
| PCHAS_144140 | -0.726 | -1.224 | -0.104 | -0.958 | -0.085 | -0.132 | -0.422 | 0.0195 | -0.528 | 0.2287 | 0.5665 | -0.008 |
| PCHAS_040120 | -0.418 | 0.0304 | 0.1342 | -0.141 | 0.0383 | 0.0576 | 0.3865 | 0.3667 | 0.0283 | 0.0647 | 0.3257 | 0.0279 |
| PCHAS_103130 | -0.479 | -0.325 | -0.035 | 0.3533 | 0.1358 | 0.261  | -0.129 | 0.3067 | 0.0148 | -0.343 | -1.388 | 0.1058 |
| PCHAS_112090 | -0.402 | 0.1518 | 0.4066 | 0.0084 | -0.06  | -0.038 | 0.3841 | -0.332 | -0.415 | -0.188 | 0.3488 | -0.264 |
| PCHAS_061070 | -0.103 | 0.1364 | 0.2559 | 0.5053 | 0.2191 | -0.246 | 0.0778 | -0.134 | -0.297 | -0.653 | -1.438 | -0.524 |
| PCHAS_010250 | 0.4066 | -0.083 | 0.1191 | -0.048 | 0.0368 | -0.276 | -0.067 | 0.3093 | -0.284 | -0.413 | -0.05  | -0.116 |
| PCHAS_145180 | -0.883 | -0.55  | -0.995 | -0.337 | 0.0185 | -0.113 | 0.8174 | 0.8062 | 0.086  | 0.5897 | 1.0149 | 0.1714 |
| PCHAS_020150 | 0.5071 | 0.2752 | 0.3059 | 0.0789 | 0.1548 | -0.367 | -0.524 | -0.691 | -0.315 | -0.964 | -0.852 | -0.429 |
| PCHAS_090850 | -1.048 | -0.721 | -0.293 | -0.406 | -0.038 | 0.4368 | 1.1161 | 1.1243 | 0.4709 | 0.8724 | 0.621  | 0.6038 |
| PCHAS_144020 | -0.152 | -0.107 | 0.0228 | 0.0536 | 0.106  | -0.012 | -0.379 | -0.094 | 0.0116 | 0.3375 | 0.549  | 0.1032 |
| PCHAS_146040 | 0.0813 | 1.1115 | 0.9875 | 0.2315 | 0.1958 | -0.045 | -0.582 | -0.073 | 0.1774 | -0.513 | -0.899 | -0.409 |
| PCHAS_142410 | -0.364 | 0.436  | 0.1454 | 0.2233 | 0.1646 | -0.273 | -0.028 | -0.361 | -0.139 | -1.432 | -0.752 | -0.979 |
| PCHAS_142690 | -0.649 | -0.465 | -0.319 | -0.388 | -0.091 | -0.003 | 0.4338 | 0.2066 | 0.0724 | 0.0807 | -0.25  | 0.2572 |
| PCHAS_090830 | 0.0432 | 0.0724 | 0.3444 | -0.171 | -0.053 | -0.258 | -0.138 | -0.247 | -0.26  | -0.256 | -0.787 | -0.048 |
| PCHAS_145770 | 0.8663 | -0.548 | -0.345 | -0.502 | -0.368 | -0.676 | 0.1706 | 0.9358 | -0.652 | 0.6249 | 1.0948 | 0.4941 |
| PCHAS_111750 | -0.52  | 0.485  | 0.8502 | 0.1861 | 0.0731 | 0.2009 | 0.093  | -0.317 | -0.008 | -0.444 | -0.641 | -0.323 |
| PCHAS_145840 | 1.9605 | 0.999  | 0.766  | 1.2329 | -0.175 | 2.1914 | 1.4122 | 1.3267 | 2.0666 | 0.5635 | 1.3302 | 0.6273 |
| PCHAS_020050 | 0.533  | 0.4102 | 0.3511 | -0.156 | -0.044 | -0.434 | 0.1978 | -0.027 | -0.5   | -0.745 | 0.2271 | -0.401 |
| PCHAS_041500 | -0.977 | -0.472 | 0.3745 | 0.023  | 0.2562 | -0.042 | 1.6398 | 0.349  | -0.186 | 0.214  | 0.1661 | 0.0315 |
| PCHAS_143240 | -0.457 | -0.058 | 0.0509 | -0.083 | -0.114 | -0.359 | -0.01  | 0.2252 | -0.407 | -1.17  | 0.0553 | -0.764 |
| PCHAS_124490 | 0.4261 | 0.146  | 0.3922 | -0.215 | -0.348 | -0.392 | -0.095 | -0.373 | -0.352 | -0.465 | -0.314 | -0.157 |
| PCHAS_072220 | -0.566 | -0.97  | -1.881 | -1.456 | -0.583 | 0.4495 | -0.745 | -0.685 | 0.3398 | 1.2756 | 1.3441 | 1.3344 |

|              |        |        |        |        |        |        |        |        |        |        |        |        |
|--------------|--------|--------|--------|--------|--------|--------|--------|--------|--------|--------|--------|--------|
| PCHAS_136980 | -0.995 | -0.634 | -0.13  | -0.784 | -0.096 | 0.2859 | 0.1287 | 0.6182 | 0.2454 | 0.3986 | 0.6218 | 0.2721 |
| PCHAS_080920 | -0.15  | -0.13  | 0.124  | 0.0112 | 0.3343 | 0.4665 | 0.7968 | 0.3637 | 0.251  | -0.448 | -0.864 | -0.459 |
| PCHAS_101570 | -0.299 | -0.016 | -0.026 | 0.0366 | 0.0887 | 0.091  | 0.3692 | -0.233 | 0.1203 | -0.606 | -0.888 | -0.535 |
| PCHAS_111950 | 0.1923 | -0.318 | -0.186 | -0.463 | -0.139 | -0.072 | -0.4   | -0.702 | -0.119 | 0.0668 | 0.1194 | 0.1065 |
| PCHAS_120130 | -0.036 | -0.285 | -0.376 | -0.336 | -0.107 | -0.161 | -0.166 | 0.5879 | -0.112 | 0.2497 | 0.3664 | 0.2863 |
| PCHAS_130420 | -0.366 | -0.052 | -0.062 | 0.4787 | 0.2715 | 0.2532 | 0.0325 | 0.0477 | 0.2609 | -1.007 | -0.861 | -0.502 |
| PCHAS_072480 | 0.5533 | 0.345  | 0.3654 | 0.0763 | -0.038 | 0.3754 | 0.4478 | -0.053 | 0.417  | 0.1225 | 0.292  | -0.051 |
| PCHAS_091970 | 0.1991 | 0.2024 | 0.2806 | 0.3855 | 0.1911 | 0.026  | 0.1996 | -0.229 | 0.1542 | -0.267 | -0.806 | 0.1543 |
| PCHAS_136310 | -0.163 | -0.52  | -0.814 | -0.468 | -0.545 | -0.251 | 0.4709 | -0.174 | -0.263 | 1.5785 | 2.3756 | 1.4589 |
| PCHAS_100850 | 0.2314 | 0.4018 | -0.324 | -0.13  | 0.0472 | -0.267 | -0.405 | -0.295 | -0.415 | -0.074 | 0.5513 | 0.1878 |
| PCHAS_093780 | 0.5339 | -0.054 | 0.1692 | -0.042 | -0.251 | -0.02  | 0.6166 | 0.333  | 0.0054 | 0.0679 | 0.3287 | 0.0852 |
| PCHAS_072430 | 0.0445 | 0.1789 | 0.0947 | 0.4702 | 0.1868 | 0.2639 | -0.081 | -0.048 | 0.225  | -0.555 | -0.608 | -0.34  |
| PCHAS_030980 | 0.3539 | 0.4285 | 0.3815 | 0.3253 | 0.0343 | 0.0098 | 0.7236 | -0.012 | 0.1169 | -0.258 | 0.1676 | -0.296 |
| PCHAS_090890 | 0.2535 | 0.1282 | 0.5939 | 0.1782 | 0.071  | 0.5265 | 0.2889 | 0.0577 | 0.043  | -0.718 | 0.1924 | -0.533 |
| PCHAS_020380 | -1.065 | -0.677 | -0.121 | -0.332 | 0.0019 | 0.2705 | 0.8776 | 0.3433 | 0.2304 | -0.269 | -0.342 | -0.593 |
| PCHAS_100220 | -0.716 | -0.473 | -1.438 | -0.59  | -0.121 | 0.5046 | 0.475  | 0.5304 | 0.4139 | 0.2927 | -0.028 | 0.2236 |
| PCHAS_120790 | -0.202 | -0.209 | -0.097 | -0.215 | -0.102 | 0.0534 | 0.3439 | 0.3721 | 0.1088 | -0.055 | -0.055 | -0.297 |
| PCHAS_081490 | 0.6059 | 0.0719 | 0.8353 | 0.3112 | 0.1255 | 0.2226 | 0.1655 | 0.1369 | 0.2008 | -0.462 | -0.736 | -0.11  |
| PCHAS_102360 | 0.0778 | 0.2711 | -0.502 | 0.4238 | -0.408 | 0.3338 | -0.379 | -0.443 | 0.3656 | -0.879 | 0.3292 | -0.191 |
| PCHAS_093550 | -0.044 | 0.1892 | 0.0994 | 0.4302 | 0.1079 | 0.1549 | -0.027 | 0.1998 | 0.0263 | 0.0189 | -1.562 | -0.015 |
| PCHAS_090660 | -0.048 | 0.0666 | 0.2347 | 0.0021 | 0.0504 | -0.035 | -0.052 | -0.069 | -0.233 | -0.351 | -0.102 | -0.401 |
| PCHAS_121600 | 0.3433 | -0.008 | 1.076  | 0.1733 | 0.2842 | -0.07  | 0.8526 | 0.3976 | -0.009 | -1.037 | -0.82  | -0.624 |
| PCHAS_083030 | -0.205 | -0.204 | -0.024 | -0.083 | -0.167 | 0.158  | -0.287 | -0.04  | -0.324 | -0.568 | -0.295 | -0.57  |
| PCHAS_062120 | -0.284 | -0.331 | -0.237 | -0.3   | -0.222 | -0.67  | 0.0925 | 0.641  | -0.271 | 0.5662 | 0.6673 | 0.5468 |
| PCHAS_135180 | 0.3568 | 0.2526 | 0.2494 | 0.1819 | 0.0321 | -0.114 | -0.033 | -0.023 | 0.01   | 0.005  | 0.1121 | 0.0708 |
| PCHAS_051000 | -0.269 | -0.017 | 0.5783 | 0.3773 | 0.1885 | -0.217 | 0.1662 | -0.153 | -0.233 | -0.734 | -0.359 | -0.5   |
| PCHAS_134020 | -0.175 | 0.2295 | -0.284 | -0.03  | 0.143  | -0.372 | 0.1788 | 0.4906 | -0.376 | -0.171 | 0.2253 | -0.251 |
| PCHAS_133840 | 0.586  | 0.2647 | 0.6362 | 0.2053 | 0.37   | -0.636 | -0.423 | -1.063 | -0.618 | -1.524 | -0.501 | -0.765 |
| PCHAS_145650 | -0.03  | -0.416 | -0.46  | -0.355 | 0.1603 | 0.4758 | -0.338 | 0.1018 | 0.4804 | 0.5627 | -0.311 | 0.1701 |
| PCHAS_061170 | -0.077 | 0.5084 | 0.5433 | -0.163 | 0.1782 | 0.6976 | -0.033 | -0.288 | -0.508 | -1.418 | -0.446 | -0.258 |
| PCHAS_113220 | -0.345 | -0.367 | 0.2006 | 0.2662 | 0.1953 | 0.6348 | 1.0314 | 0.5144 | 0.4179 | -0.294 | 0.551  | -0.115 |
| PCHAS_041870 | 0.3334 | 0.0374 | 0.4469 | -0.112 | 0.3756 | 0.6756 | 0.2255 | -0.284 | 0.5122 | 0.1726 | 0.2225 | 0.1582 |
| PCHAS_050170 | 0.7535 | -0.592 | -0.319 | -0.484 | -0.071 | -0.005 | -0.468 | -0.261 | 0.453  | 1.3122 | -0.277 | 1.1034 |
| PCHAS_111340 | -0.658 | -0.193 | 0.3791 | 0.148  | 0.1631 | 0.0491 | 0.2839 | 0.1223 | -0.159 | 0.4316 | -0.967 | 0.2069 |
| PCHAS_101760 | -0.212 | 0.1588 | 0.0629 | -0.018 | 0.0932 | 0.0263 | 0.8734 | 0.5266 | 0.0476 | -0.149 | 0.4609 | -0.145 |
| PCHAS_111290 | 0.3631 | -0.587 | -0.477 | -0.363 | 0.0388 | 0.5188 | 0.1002 | 0.5563 | 0.6877 | 0.8989 | 0.256  | 0.8441 |
| PCHAS_062050 | 0.4159 | -0.032 | 0.4449 | -0.13  | -0.086 | -0.664 | -0.458 | -0.144 | -0.71  | -0.378 | -0.424 | -0.263 |
| PCHAS_101040 | 0.3366 | -0.339 | 0.4132 | -0.296 | 0.0849 | -0.424 | -0.099 | -0.108 | -0.422 | 0.121  | 0.4237 | 0.3868 |
| PCHAS_092180 | -0.394 | -1.029 | -0.983 | -1.07  | -0.363 | -0.145 | -0.687 | -0.486 | -0.037 | 1.8641 | 2.1122 | 1.4369 |
| PCHAS_091710 | 0.3674 | 0.3227 | 0.34   | 0.5196 | 0.2435 | -0.104 | -0.859 | 0.0062 | -0.106 | -0.892 | -1.023 | -0.483 |
| PCHAS_030360 | -0.891 | -0.66  | 0.2958 | 0.302  | 0.2474 | 0.1413 | 0.9747 | 0.4154 | -0.035 | -0.047 | -0.553 | -0.138 |
| PCHAS_144360 | 0.3336 | 0.8969 | 0.1885 | -0.071 | -0.118 | 0.9907 | -0.076 | 0.06   | 0.5317 | 0.2486 | 0.5876 | 0.2412 |
| PCHAS_082340 | 0.5284 | 0.2547 | 0.2781 | -0.282 | -0.35  | -0.318 | -0.358 | -0.97  | -0.364 | -0.908 | 0.1913 | -0.556 |
| PCHAS_061880 | 1.6372 | 0.5534 | -0.899 | 0.7746 | -0.268 | 0.9213 | 0.8071 | 0.7649 | 0.5122 | 0.1922 | 0.2745 | -0.027 |
| PCHAS_101260 | 0.2279 | 0.0228 | 0.1508 | 0.314  | 0.1931 | 0.0216 | 0.9026 | 0.4919 | 0.1661 | -0.383 | 0.0026 | -0.284 |
| PCHAS_020490 | -1.675 | -1.748 | -1.872 | -1.18  | -0.168 | 0.1479 | 0.6634 | 0.8068 | 0.4115 | 1.1957 | 0.5492 | 0.774  |
| PCHAS_120690 | 0.2184 | 0.2449 | 0.5035 | 0.0607 | 0.0182 | -0.249 | -0.81  | -0.523 | -0.29  | -0.901 | -0.887 | -0.817 |
| PCHAS_112380 | -0.806 | -0.518 | -1.413 | 0.3543 | -0.143 | 1.0408 | -0.41  | 0.0889 | 0.6249 | 1.042  | 0.351  | 0.3452 |
| PCHAS_131730 | 0.0469 | 0.2631 | 0.4023 | 0.1504 | -0.023 | -0.157 | 0.0795 | -0.171 | -0.32  | -0.128 | -0.723 | -0.221 |
| PCHAS_071130 | 1.0482 | 0.7098 | 0.5998 | -0.017 | 0.0794 | -0.615 | -0.883 | -0.584 | -0.565 | -0.391 | -0.056 | -0.168 |

|              |        |        |        |        |        |        |        |        |        |        |        |        |
|--------------|--------|--------|--------|--------|--------|--------|--------|--------|--------|--------|--------|--------|
| PCHAS_111650 | -0.389 | -1.866 | -0.848 | -1.336 | -0.329 | 0.1064 | -0.199 | -0.151 | 0.2265 | 1.0969 | 0.5996 | 0.8799 |
| PCHAS_071160 | 0.2299 | -0.282 | -0.555 | -0.034 | -0.087 | 0.2183 | -0.302 | 0.0604 | 0.0043 | 0.8918 | 1.1127 | 0.933  |
| PCHAS_110780 | 0.0577 | -0.061 | -0.564 | -0.023 | -0.247 | 0.5365 | -0.32  | -0.14  | 0.522  | 1.1956 | 0.4213 | 0.7456 |
| PCHAS_135680 | -0.418 | -0.022 | 0.4134 | -0.003 | -0.38  | -0.304 | -0.214 | -0.466 | -0.311 | -0.461 | 0.4455 | -0.296 |
| PCHAS_140850 | -1.028 | -1.141 | -0.798 | -0.664 | -0.276 | -0.155 | 0.8646 | 1.0709 | 0.1285 | 0.7082 | 0.8868 | 0.5555 |
| PCHAS_146120 | 0.4091 | 0.035  | 0.0692 | -0.253 | 0.0645 | -0.239 | 0.1517 | -0.119 | -0.31  | -0.247 | -0.045 | 0.4004 |
| PCHAS_041100 | -0.197 | 0.2403 | 0.0791 | 0.2641 | -0.016 | 0.31   | 0.0733 | 0.0322 | 0.2334 | -0.277 | -1.029 | -0.128 |
| PCHAS_052420 | -0.068 | 0.3078 | 0.5236 | 0.1002 | -0.046 | -0.134 | -0.621 | -0.31  | -0.209 | -0.458 | -1.07  | -0.681 |
| PCHAS_093260 | -0.063 | 0.1792 | 0.1462 | 0.2936 | 0.1139 | 0.0516 | -0.334 | -0.199 | 0.208  | -0.589 | -0.66  | -0.622 |
| PCHAS_020300 | 0.0228 | -0.733 | -1.354 | -2.068 | -0.942 | -0.686 | -1.163 | -0.934 | -0.784 | 1.1998 | 2.258  | 1.6023 |
| PCHAS_041650 | 0.5697 | 0.2873 | 0.468  | 0.451  | 0.0751 | -0.132 | 0.4154 | -0.028 | 0.0745 | -0.504 | -1.458 | -0.493 |
| PCHAS_102670 | 0.0646 | 0.23   | 0.5304 | 0.3943 | 0.0751 | 0.0214 | -0.205 | 0.037  | -0.008 | -0.945 | -1.6   | -1.06  |
| PCHAS_092310 | -1.889 | -1.765 | -1.58  | -1.296 | -0.01  | 0.5199 | 1.3656 | 1.3267 | 0.6081 | 0.3365 | 0.194  | -0.15  |
| PCHAS_132860 | 1.0129 | 0.3099 | -0.384 | 0.7138 | -0.224 | 1.0391 | 0.8447 | 0.4578 | 0.9927 | 0.0008 | 0.215  | 0.3852 |
| PCHAS_113120 | 0.3677 | 0.3318 | 0.4449 | 0.1107 | -0.145 | -0.435 | -0.185 | -0.2   | -0.507 | 0.2409 | -0.038 | -0.456 |
| PCHAS_080980 | -1     | -0.419 | -0.418 | -0.366 | -0.235 | -0.571 | -0.644 | -0.125 | -0.557 | 0.7353 | -0.002 | 0.9135 |
| PCHAS_113140 | 0.835  | 0.5768 | 0.7555 | 0.3872 | 0.3338 | 0.065  | -0.2   | -0.473 | -0.29  | -2.191 | -0.959 | -0.68  |
| PCHAS_130780 | 0.1756 | 0.2196 | 0.2861 | 0.2248 | 0.1064 | -0.252 | 0.1029 | -0.203 | -0.357 | -0.85  | -0.464 | -0.419 |
| PCHAS_051340 | 0.0652 | 0.4745 | 0.6604 | 0.6137 | 0.1153 | -0.012 | -0.597 | -0.93  | -0.218 | -1.478 | -1.389 | -1.226 |
| PCHAS_000150 | 0.5191 | 0.1078 | 0.2404 | -0.335 | -0.53  | -0.515 | -0.472 | -0.47  | -0.544 | -0.037 | 0.3656 | 0.4027 |
| PCHAS_132130 | 0.2284 | 0.3124 | 0.5591 | 0.0441 | 0.0366 | 0.2578 | -0.582 | -0.198 | -0.323 | -0.314 | 0.4096 | -0.328 |
| PCHAS_123670 | 0.0732 | -0.008 | -0.025 | 0.198  | 0.1992 | -0.294 | -0.048 | -0.456 | -0.304 | -1.328 | -1.414 | -0.892 |
| PCHAS_103430 | 0.2859 | 0.311  | 0.4295 | -0.103 | 0.0335 | -0.272 | -0.062 | -0.193 | -0.343 | -0.554 | -0.312 | -0.414 |
| PCHAS_051960 | -0.445 | -1.971 | -1.888 | -1.514 | -0.39  | 0.56   | 0.2173 | 0.2559 | 0.5706 | 0.6464 | 0.608  | 0.7863 |
| PCHAS_090290 | -0.379 | 1.1805 | -0.407 | -0.533 | -0.152 | -0.042 | 0.0561 | 0.0381 | -0.174 | -0.28  | 1.4276 | 0.2807 |
| PCHAS_143230 | 0.265  | 0.2951 | 0.4178 | -0.012 | 0.249  | -0.319 | 0.2228 | 0.0176 | -0.342 | -0.638 | 0.1545 | -0.609 |
| PCHAS_110740 | 0.472  | -0.376 | -0.959 | -0.59  | -0.164 | -0.05  | 0.0336 | 0.1373 | -0.012 | 1.0571 | 1.4138 | 0.7191 |
| PCHAS_132310 | 0.344  | 0.1697 | 0.6862 | 0.1266 | 0.3166 | -0.581 | 0.2941 | -0.171 | -0.556 | -2.318 | -0.173 | -1.084 |
| PCHAS_083730 | 1.0204 | 0.4979 | 0.0595 | -0.296 | -0.749 | -0.506 | -1.189 | -0.316 | -0.285 | 1.132  | 2.8596 | 0.617  |
| PCHAS_060750 | 0.783  | 0.2271 | 0.4572 | 0.3681 | 0.1231 | -0.285 | 0.1066 | -0.779 | -0.318 | -1.282 | -0.71  | -0.952 |
| PCHAS_113620 | -0.265 | -0.261 | 0.3366 | -0.169 | -0.126 | -0.558 | -0.186 | -0.474 | -0.487 | -0.858 | -0.588 | -0.654 |
| PCHAS_091920 | 0.4163 | 0.4208 | 0.469  | 0.3637 | 0.147  | -0.313 | -0.776 | -0.647 | -0.344 | -1.413 | -1.502 | -1.139 |
| PCHAS_144070 | 0.1725 | 0.1288 | 0.3253 | 0.0064 | 0.1273 | 0.044  | 0.2293 | 0.2178 | -0.255 | -0.69  | 0.3388 | -1.05  |
| PCHAS_031640 | 0.1142 | 0.2472 | 0.5859 | 0.9164 | 0.303  | 0.5232 | 0.3512 | 0.1734 | 0.3512 | -1.433 | -0.582 | -0.354 |
| PCHAS_121380 | -0.248 | 0.0626 | 0.1088 | -0.008 | 0.0937 | -0.371 | 0.2822 | -0.006 | -0.162 | -0.694 | 0.4047 | -0.435 |
| PCHAS_136360 | -1.236 | -0.445 | -0.318 | -0.433 | -0.141 | 0.2809 | 0.0913 | 0.3178 | 0.1761 | -0.227 | -0.324 | -0.213 |
| PCHAS_072090 | 0.5361 | 0.3766 | 0.0396 | -0.16  | -0.183 | -0.126 | -1.231 | -0.545 | -0.198 | -1.019 | -0.271 | -0.547 |
| PCHAS_133800 | 0.883  | 0.68   | 1.125  | 0.0134 | 0.0862 | -0.207 | 0.0712 | -0.478 | -0.057 | -0.92  | -0.088 | -0.528 |
| PCHAS_011070 | 0.115  | 0.0188 | -0.09  | -0.032 | 0.0266 | 0.4366 | -0.481 | 0.0387 | 0.4274 | -0.069 | -0.377 | -0.108 |
| PCHAS_111860 | -0.113 | -0.101 | 0.2267 | -0.12  | -0.143 | -0.187 | 0.2497 | 0.1587 | -0.093 | 0.0895 | 0.2237 | 0.1909 |
| PCHAS_102630 | 0.336  | 0.3472 | 0.4227 | 0.3515 | 0.1279 | -0.3   | -0.526 | -0.405 | -0.135 | -0.479 | -1.043 | -0.519 |
| PCHAS_113180 | -0.393 | 0.1952 | 0.2959 | -0.1   | 0.262  | -0.619 | -0.294 | -0.073 | -0.26  | -0.476 | -0.504 | -0.087 |
| PCHAS_111070 | 0.1122 | 0.4457 | 0.4174 | 0.5415 | 0.1609 | -0.272 | -0.969 | -0.768 | -0.179 | -1.083 | -1.418 | -0.761 |
| PCHAS_093220 | -0.062 | 0.4178 | 0.0636 | 0.2095 | 0.0221 | 0.0597 | 0.0533 | -0.014 | -0.075 | -0.428 | -0.351 | -0.46  |
| PCHAS_131780 | 0.3475 | 0.2973 | 0.365  | 0.0782 | 0.0346 | -0.337 | 0.4393 | 0.1524 | -0.53  | 0.2297 | 1.2672 | 0.5617 |
| PCHAS_112300 | 0.0793 | 0.0738 | -0.158 | -0.197 | -0.12  | 0.4092 | -0.262 | 0.1062 | 0.3768 | 0.113  | -0.994 | -0.004 |
| PCHAS_146020 | -0.202 | -0.067 | 0.1177 | -0.056 | 0.1209 | 0.2688 | 0.5681 | 0.1937 | 0.5115 | 0.5337 | 0.3338 | 0.245  |
| PCHAS_142580 | 0.1794 | 0.075  | 0.6393 | -0.181 | -0.03  | 0.4358 | 0.6287 | 0.499  | 0.2364 | 0.7394 | 0.7136 | 0.3669 |
| PCHAS_142870 | 0.3006 | 0.4927 | -0.33  | 0.5241 | -0.501 | -0.4   | -0.652 | -0.019 | -0.337 | -0.801 | -0.38  | -0.359 |
| PCHAS_123060 | -0.615 | -0.212 | 0.335  | 0.1524 | 0.1807 | 0.3864 | -0.29  | -0.515 | -0.012 | -0.797 | -0.735 | -0.644 |

|              |        |        |        |        |        |        |        |        |        |        |        |        |
|--------------|--------|--------|--------|--------|--------|--------|--------|--------|--------|--------|--------|--------|
| PCHAS_070680 | 0.1937 | 0.0871 | 0.1228 | 0.0518 | 0.2014 | -0.123 | 0.3503 | -0.007 | -0.158 | -0.61  | -0.196 | -0.464 |
| PCHAS_135510 | -0.15  | -0.556 | -0.815 | -0.427 | -0.185 | 1.1319 | 1.2426 | 0.2276 | 0.5312 | 2.5176 | 1.5817 | 2.1471 |
| PCHAS_010170 | 0.223  | 0.3241 | 0.6886 | 0.3963 | 0.2034 | -0.077 | 0.1729 | -0.225 | -0.094 | -1.037 | -0.919 | -0.703 |
| PCHAS_132620 | -0.33  | -0.828 | -0.06  | -0.793 | 0.1593 | 0.4654 | 0.931  | 0.6543 | 0.3001 | 0.8781 | 0.6469 | 0.5021 |
| PCHAS_020260 | -0.53  | -0.966 | -0.564 | 0.124  | -0.247 | 0.2645 | 0.8475 | 0.3464 | 0.3081 | -0.19  | 0.0075 | -0.097 |
| PCHAS_072970 | 1.6041 | 0.318  | -0.673 | 0.4163 | 0.0999 | 0.3714 | -0.51  | 0.0088 | -0.02  | -0.12  | -0.456 | 0.1316 |
| PCHAS_146360 | 0.1397 | -0.345 | 0.4119 | 0.0793 | 0.154  | 0.1621 | 0.7464 | 0.5572 | 0.1191 | 0.4867 | 0.6401 | 0.2113 |
| PCHAS_120540 | -0.049 | 0.0335 | 0.7785 | 0.2028 | 0.047  | -0.284 | 0.5816 | -0.136 | -0.242 | -1.012 | -0.141 | -0.696 |
| PCHAS_130930 | 0.8927 | 0.5595 | 0.5471 | 0.4101 | 0.1665 | -0.362 | -0.183 | -0.611 | -0.261 | -1.899 | -1.342 | -1.091 |
| PCHAS_090150 | 0.2243 | 0.5025 | 0.4045 | 0.1105 | 0.022  | -0.303 | -0.016 | -0.354 | -0.366 | -0.785 | -0.023 | -0.554 |
| PCHAS_051680 | 0.0434 | -0.121 | 0.0386 | -0.081 | -0.092 | 0.1976 | -0.406 | -0.197 | 0.1737 | 0.3252 | -0.407 | -0.005 |
| PCHAS_091450 | -0.002 | 0.1746 | -0.614 | 0.0209 | 0.3234 | 0.2632 | 0.3174 | 0.1863 | 0.1251 | -1.695 | -1.261 | -0.309 |
| PCHAS_000950 | -0.406 | 0.2059 | 0.1716 | 0.2173 | -0.034 | -0.179 | -0.28  | -0.248 | -0.217 | -0.721 | -0.901 | -0.582 |
| PCHAS_082370 | -0.4   | 0.5147 | 0.1214 | 0.7265 | 0.3507 | 0.0516 | -0.241 | -0.786 | 0.0653 | -1.341 | -1.116 | -0.998 |
| PCHAS_081560 | 0.312  | 0.4882 | 0.622  | 0.369  | 0.1235 | -0.575 | -1.057 | -1.191 | -0.626 | -1.459 | -0.972 | -0.979 |
| PCHAS_091350 | 0.224  | 0.1289 | 0.0094 | 0.1263 | -0.019 | 0.2951 | -0.45  | 0.3552 | 0.2525 | 0.5343 | 2.3405 | 0.9329 |
| PCHAS_091220 | -0.388 | -0.386 | -0.299 | 0.0544 | -0.057 | 0.0194 | -0.08  | 0.2202 | 0.194  | 0.4807 | 1.6812 | 0.4052 |
| PCHAS_052120 | -0.202 | -0.055 | 0.3083 | 0.1629 | -0.021 | -0.248 | -0.886 | -0.321 | -0.37  | -1.059 | -0.794 | -1.188 |
| PCHAS_061920 | -0.076 | 0.1466 | 0.3142 | 0.0331 | 0.0877 | -0.186 | -0.081 | 0.2973 | 0.0228 | -0.421 | 0.3006 | -0.456 |
| PCHAS_142100 | -0.113 | 0.0742 | 0.0535 | 0.114  | 0.1455 | -0.132 | 0.6611 | -0.02  | -0.045 | -0.439 | -0.166 | -0.352 |
| PCHAS_100410 | 0.3304 | 0.0648 | 0.3854 | -0.427 | 0.0389 | 0.0864 | 0.2395 | -0.03  | -0.174 | -0.214 | 0.6339 | -0.242 |
| PCHAS_040670 | -0.726 | -0.645 | -0.578 | -0.736 | -0.194 | -0.08  | 0.2546 | 0.2947 | 0.0009 | 0.9229 | 1.0114 | 0.5061 |
| PCHAS_122140 | -0.096 | -0.099 | -0.017 | 0.0769 | -0.077 | 0.0497 | -0.035 | 0.0031 | 0.2432 | 0.1142 | 0.3361 | 0.2568 |
| PCHAS_131120 | -0.27  | 0.0526 | 0.5137 | 0.0282 | 0.2141 | -0.259 | -0.418 | -0.204 | -0.253 | -0.46  | -0.3   | -0.352 |
| PCHAS_052150 | 0.6014 | 0.6716 | 0.5747 | 0.0617 | -0.083 | -0.326 | -1.35  | -0.721 | -0.575 | -1.16  | -0.977 | -0.723 |
| PCHAS_091430 | 0.2252 | 0.1419 | 0.7705 | -0.242 | 0.0394 | -0.261 | -0.047 | 0.385  | -0.38  | 0.2152 | 0.6741 | -0.402 |
| PCHAS_081520 | 0.0376 | 0.3769 | 0.2628 | 0.4448 | 0.1029 | -0.133 | -0.129 | 0.0978 | -0.272 | -0.399 | -0.995 | -0.459 |
| PCHAS_131300 | -0.042 | -0.008 | -0.939 | 0.368  | -1.019 | 0.206  | -0.018 | -0.238 | 0.0368 | 0.149  | 0.1022 | 0.3003 |
| PCHAS_093440 | -0.114 | 0.0199 | -0.043 | 0.0948 | 0.227  | -0.119 | -0.181 | -0.254 | -0.301 | -0.717 | -0.518 | -0.31  |
| PCHAS_071660 | -0.11  | 0.155  | 0.0502 | 0.0918 | 0.1212 | 0.0512 | 0.0084 | 0.1521 | -0.088 | -0.135 | -0.482 | 0.0736 |
| PCHAS_050310 | 0.0205 | -0.186 | 0.2488 | 0.1638 | 0.0486 | 0.0961 | -0.422 | -0.176 | -0.255 | -0.16  | -0.802 | -0.268 |
| PCHAS_130710 | 0.0666 | -0.241 | -0.763 | 0.0208 | -0.137 | 0.608  | -0.333 | 0.0373 | 0.3362 | 0.5372 | -0.012 | 0.3811 |
| PCHAS_130660 | -0.592 | -0.572 | -1.248 | -0.257 | -0.63  | 0.0771 | 0.0888 | 0.4232 | 0.026  | 0.5215 | 0.8073 | 0.9136 |
| PCHAS_121260 | 0.1533 | 0.3871 | 0.4783 | -0.071 | 0.1095 | -0.287 | 0.1077 | -0.242 | -0.358 | -0.695 | -0.587 | -0.037 |
| PCHAS_122580 | -0.311 | 0.9121 | 0.8729 | 0.3439 | 0.2732 | 0.0153 | -0.074 | -0.028 | 0.2428 | -0.463 | -0.263 | -0.474 |
| PCHAS_134170 | 0.2985 | 0.0853 | -0.025 | 0.2472 | 0.1124 | -0.083 | -0.007 | -0.382 | -0.025 | -0.522 | -1.019 | -0.546 |
| PCHAS_122920 | 0.002  | 0.0975 | 0.4425 | 0.1938 | 0.1833 | 0.1634 | 0.4468 | 0.4996 | 0.2857 | 0.3526 | -0.304 | 0.0987 |
| PCHAS_136050 | 0.0894 | 0.3557 | 0.3351 | -0.021 | -0.079 | -0.605 | -0.332 | -0.875 | -0.584 | -1.698 | -0.093 | -0.667 |
| PCHAS_100740 | -0.004 | 0.6919 | 0.8093 | -0.107 | 0.2511 | -0.738 | -0.206 | -0.235 | -0.654 | -0.645 | -0.576 | -0.737 |
| PCHAS_131060 | 0.2086 | 0.438  | 0.6216 | 0.8218 | 0.2102 | -0.886 | -0.666 | -0.801 | -0.777 | -1.659 | -1.619 | -0.486 |
| PCHAS_134400 | 0.8327 | 0.8878 | 0.538  | 0.7653 | 0.1306 | 1.311  | 0.9755 | 0.5637 | 0.7795 | 0.2813 | -0.365 | 0.4329 |
| PCHAS_080650 | -0.726 | -0.313 | -0.32  | -0.012 | 0.0171 | -0.002 | 0.5266 | 0.6536 | 0.0704 | 0.1856 | 0.3944 | -0.054 |
| PCHAS_140420 | -0.092 | -0.235 | 0.0198 | -0.11  | -0.026 | 0.1567 | 0.2648 | 0.2046 | 0.1529 | 0.2978 | -0.447 | 0.0874 |
| PCHAS_145360 | -0.123 | 0.146  | 0.3034 | -0.1   | 0.2328 | -0.197 | 0.2645 | 0.0907 | -0.293 | -0.524 | 0.2066 | -0.291 |
| PCHAS_112890 | -0.616 | -0.121 | 0.1012 | 0.489  | 0.2796 | 0.2647 | 0.838  | 0.237  | 0.2541 | -0.544 | -1.035 | -0.642 |
| PCHAS_081660 | -0.261 | 0.7012 | 0.6784 | 0.3368 | 0.2116 | -0.145 | 0.1074 | -0.25  | -0.351 | -1.261 | -0.521 | -0.514 |
| PCHAS_031210 | -0.133 | 0.0829 | 0.6432 | 0.0471 | 0.1468 | 0.0099 | -0.161 | 0.051  | -0.138 | -0.066 | 0.1914 | -0.339 |
| PCHAS_051740 | 0.4783 | 0.3685 | 0.2892 | 0.5874 | 0.3778 | 0.0912 | -0.645 | -0.264 | -0.039 | -0.552 | -0.687 | -0.524 |
| PCHAS_010900 | 0.0604 | 0.2514 | 0.8266 | 0.2    | 0.2789 | -0.277 | 0.2006 | -0.007 | -0.263 | -0.95  | -1.332 | -0.477 |
| PCHAS_101680 | 0.1915 | -0.358 | 0.1842 | -0.554 | 0.094  | -0.494 | 0.1518 | -0.109 | -0.605 | -0.244 | 0.8204 | -0.356 |

|              |        |        |        |        |        |        |        |        |        |        |        |        |
|--------------|--------|--------|--------|--------|--------|--------|--------|--------|--------|--------|--------|--------|
| PCHAS_051410 | 1.2971 | 0.1999 | -1.819 | 0.6498 | -1.409 | 0.852  | 1.3762 | 0.2173 | 0.6384 | 0.9028 | -0.235 | 0.0472 |
| PCHAS_103780 | -0.79  | -0.161 | 0.2466 | 0.0389 | 0.1242 | -0.036 | -0.279 | 0.0174 | -0.071 | -0.431 | -0.91  | -0.582 |
| PCHAS_143680 | 0.6051 | 0.3741 | -0.038 | 0.1661 | -0.132 | -0.501 | -0.442 | -0.802 | -0.488 | -0.657 | -0.413 | -0.412 |
| PCHAS_120940 | 1.1919 | -0.12  | -0.412 | -2.532 | -0.974 | -1.095 | -2.085 | -1.072 | -1.363 | 0.3655 | 1.6407 | 0.9989 |
| PCHAS_100170 | 0.1283 | 0.1558 | 0.1892 | 0.4317 | 0.3237 | 0.1353 | 0.1961 | -0.114 | 0.043  | -1.136 | -0.945 | -0.811 |
| PCHAS_102420 | 0.0566 | -0.042 | 0.3531 | 0.0688 | 0.0253 | -0.178 | 0.9087 | -0.155 | -0.232 | -0.664 | -0.34  | -0.5   |
| PCHAS_144790 | 0.425  | 0.1774 | 0.5581 | 0.213  | 0.2975 | 0.3096 | 0.3844 | -0.043 | 0.4026 | -0.711 | -0.458 | -0.265 |
| PCHAS_091550 | 0.4872 | 0.1358 | -0.256 | -0.102 | -0.19  | -0.302 | 0.221  | -0.028 | -0.359 | -0.364 | 0.0095 | 0.075  |
| PCHAS_112730 | 0.0424 | -0.47  | -0.519 | -0.193 | -0.116 | -0.056 | 0.4344 | 0.1669 | -0.003 | -0.149 | -0.048 | -0.05  |
| PCHAS_091020 | -0.446 | 0.2006 | 0.3879 | 0.5473 | -0.091 | -0.755 | -0.31  | -0.162 | -0.425 | -0.789 | -1.7   | -0.537 |
| PCHAS_143510 | 0.1118 | -0.231 | 0.1594 | -0.265 | 0.1129 | -0.115 | 0.1593 | 0.1344 | -0.377 | 0.4113 | 0.5553 | 0.1666 |
| PCHAS_135770 | 0.3656 | 0.0613 | 0.2413 | -0.084 | 0.0505 | 0.2774 | -0.802 | -0.226 | 0.2056 | 0.0413 | -0.49  | -0.06  |
| PCHAS_132780 | -0.118 | 0.1144 | 0.5276 | -0.202 | 0.2384 | -0.329 | 0.5327 | 0.6863 | -0.245 | -0.351 | 0.114  | -0.205 |
| PCHAS_070490 | 0.6605 | -0.113 | 0.4413 | -0.088 | 0.194  | -0.3   | 0.6429 | 0.1426 | -0.192 | -0.367 | 0.3527 | -0.379 |
| PCHAS_100250 | -0.24  | -0.674 | -0.03  | -0.186 | -0.037 | 0.5468 | 0.2152 | 0.5527 | 0.2675 | 0.7823 | 0.3295 | 0.6345 |
| PCHAS_145170 | -0.279 | -0.556 | -0.442 | 0.0034 | -0.051 | 0.0522 | 0.0717 | 0.4048 | 0.0395 | 0.4018 | 0.1043 | 0.1814 |
| PCHAS_142980 | -0.35  | -0.005 | 0.0527 | 0.8422 | 0.4289 | 0.0093 | -1.046 | -0.448 | -0.019 | -1.186 | -1.164 | -0.759 |
| PCHAS_122730 | 0.5717 | 0.0773 | 0.1386 | 0.49   | -0.308 | -0.222 | -0.26  | -0.424 | -0.202 | 0.325  | 0.9447 | 0.5849 |
| PCHAS_030740 | -0.336 | -0.834 | -0.71  | -0.219 | -0.096 | 0.0848 | 0.3111 | 0.0919 | 0.1818 | -0.117 | 0.6628 | 0.2395 |
| PCHAS_091730 | -0.508 | -0.628 | -0.566 | -1.054 | -0.443 | -0.196 | 0.0558 | 0.5494 | -0.087 | 0.9857 | 0.4799 | 0.627  |
| PCHAS_103440 | 0.8201 | 0.5009 | 0.2575 | 0.3154 | -0.043 | -0.513 | -0.478 | -0.668 | -0.797 | -0.88  | -0.257 | -0.63  |
| PCHAS_072390 | 0.6368 | 0.2565 | 0.1667 | -0.007 | -0.168 | 0.402  | 0.3222 | 0.0566 | -0.217 | 0.031  | 0.2462 | -0.008 |
| PCHAS_134790 | -1.052 | -0.681 | -0.135 | -0.093 | 0.4017 | 0.3431 | 0.7795 | 0.3774 | 0.1791 | -0.313 | -0.297 | -0.664 |
| PCHAS_011030 | 0.3771 | 0.1873 | 0.2426 | 0.0001 | 0.0073 | 0.0118 | -0.014 | 0.0857 | 0.011  | -0.404 | -0.189 | -0.098 |
| PCHAS_131720 | 0.1642 | 0.4537 | 0.1979 | 0.1082 | 0.1236 | -0.152 | 0.4926 | 0.0348 | -0.118 | -1.003 | -0.763 | -0.53  |
| PCHAS_090080 | 0.5877 | 0.2952 | 0.4241 | 0.0817 | -0.114 | -0.466 | -0.238 | -0.233 | -0.407 | -0.207 | -0.515 | -0.1   |
| PCHAS_061530 | 0.4434 | 0.7146 | 0.801  | 0.0299 | 0.1205 | -0.421 | 0.259  | 0.1058 | -0.243 | -1.469 | -0.053 | -0.691 |
| PCHAS_081950 | -0.918 | -0.556 | -0.066 | 0.0392 | 0.3073 | 0.3512 | 1.1064 | 0.9767 | 0.3705 | 0.1614 | 0.6774 | 0.0341 |
| PCHAS_113560 | -0.36  | -0.48  | -0.791 | -0.388 | -0.115 | 0.4791 | -0.223 | -0.114 | 0.5178 | 0.4703 | -0.179 | 0.6001 |
| PCHAS_145910 | -0.98  | -1.461 | -1.443 | -1.582 | -0.478 | 0.1338 | 0.4848 | 1.0565 | 0.1699 | 1.1545 | 0.8138 | 0.9575 |
| PCHAS_103830 | 0.2627 | -0.112 | 0.5417 | 0.0326 | -0.191 | -0.098 | 0.1057 | -0.185 | -0.257 | -0.548 | 0.1815 | -0.112 |
| PCHAS_010920 | 0.5164 | 0.2018 | 0.3509 | -0.022 | 0.1057 | -0.071 | 0.3418 | 0.3344 | -0.033 | -0.265 | -0.058 | -0.082 |
| PCHAS_112670 | -0.228 | -0.143 | 0.0754 | -0.21  | 0.1142 | -0.408 | 0.0967 | 0.2485 | -0.506 | -0.517 | -0.003 | 0.1    |
| PCHAS_113880 | -1.192 | 0.0135 | 0.0495 | 0.2632 | 0.3208 | -0.074 | 0.1203 | 0.0392 | 0.0625 | -0.654 | -0.241 | -0.641 |
| PCHAS_114140 | 0.3949 | -0.196 | -0.261 | -0.111 | -0.261 | 0.5055 | 1.1267 | -0.394 | -0.266 | 1.6771 | 1.4489 | 1.3244 |
| PCHAS_071360 | -0.848 | -0.03  | 0.3634 | 0.6287 | 0.3872 | 0.1256 | -0.68  | -0.52  | 0.2002 | -1.741 | -1.56  | -1.503 |
| PCHAS_121050 | -1.175 | -0.609 | -0.715 | -0.1   | 0.1914 | 0.2257 | 0.5694 | 0.4949 | 0.4881 | -0.295 | -0.406 | -0.345 |
| PCHAS_142590 | -0.898 | -0.025 | 0.4012 | -0.006 | 0.2882 | -0.028 | 0.496  | 0.2025 | 0.214  | -0.479 | -0.111 | -0.619 |
| PCHAS_132220 | -0.684 | -0.507 | -0.015 | -0.045 | 0.0536 | 0.141  | 0.7566 | 0.5472 | 0.2392 | 0.1303 | 0.2572 | -0.038 |
| PCHAS_072720 | 0.0441 | 0.5098 | -0.095 | 0.3132 | 0.2312 | -0.03  | 0.2685 | -0.428 | -0.218 | -0.654 | -0.549 | -0.26  |
| PCHAS_051180 | 0.4061 | 0.2122 | 0.5714 | 0.2656 | 0.0017 | 0.2373 | 0.5604 | 0.0776 | 0.0999 | -0.149 | -0.656 | -0.215 |
| PCHAS_140570 | 0.0363 | 0.5511 | 0.1679 | 0.4166 | 0.1708 | -0.058 | -0.167 | -0.451 | -0.116 | -0.916 | -1.608 | -0.658 |
| PCHAS_134390 | -0.43  | -1.698 | -1.299 | -1.172 | -0.522 | 0.2903 | 0.2915 | 1.0138 | 0.2139 | 1.7776 | 1.7033 | 1.5684 |
| PCHAS_136490 | -0.643 | -0.102 | 0.0629 | 1.1229 | 0.1818 | 0.2014 | 0.0739 | -0.098 | 0.3608 | -0.777 | -0.962 | -0.772 |
| PCHAS_051950 | -0.308 | -1.118 | -1.138 | -1.521 | -0.402 | 0.538  | -0.776 | 0.0112 | 0.4    | 1.5308 | 1.172  | 1.2676 |
| PCHAS_090520 | 0.9252 | 0.7558 | 0.4301 | -0.095 | -0.113 | -0.113 | -0.869 | -0.996 | -0.327 | 0.534  | 0.3762 | 0.6447 |
| PCHAS_030610 | 0.4113 | -0.358 | -0.184 | -0.51  | -0.177 | -0.178 | -0.189 | -0.114 | 0.022  | 1.5301 | 1.3886 | 1.4615 |
| PCHAS_031420 | 0.1252 | 0.0719 | 0.2926 | 0.0415 | -0.069 | -0.656 | -0.131 | -0.211 | -0.51  | -0.461 | -0.162 | -0.16  |
| PCHAS_103420 | -0.226 | 0.4872 | 0.0035 | 0.374  | 0.1155 | 0.3994 | -0.41  | 0.3561 | 0.157  | 0.3318 | -0.267 | -0.166 |
| PCHAS_114220 | -0.005 | -0.616 | -0.017 | 0.1985 | -0.027 | 0.6778 | 0.3135 | 1.0833 | 0.6773 | 1.6026 | 0.553  | 1.2037 |



|              |        |        |        |        |        |        |        |        |        |        |        |        |
|--------------|--------|--------|--------|--------|--------|--------|--------|--------|--------|--------|--------|--------|
| PCHAS_134360 | 0.6261 | 0.2998 | 0.5031 | 0.1513 | -0.091 | 0.347  | 0.3456 | 0.4104 | 0.0034 | 0.5798 | 0.6745 | 0.4769 |
| PCHAS_070460 | 0.8547 | 0.1543 | -0.159 | 0.043  | -0.037 | 0.1972 | 0.8016 | 0.5079 | 0.0348 | 0.4639 | 1.384  | 0.1939 |
| PCHAS_051480 | 0.2941 | 0.2728 | 0.2404 | 0.3558 | 0.1898 | -0.122 | 0.2073 | -0.304 | -0.202 | -0.707 | -0.05  | -0.678 |
| PCHAS_083520 | 0.0976 | 0.0459 | -0.154 | -0.129 | -0.026 | 0.3958 | 0.1461 | 0.1458 | 0.1812 | 0.3994 | 0.0053 | 0.0481 |
| PCHAS_030300 | -0.744 | -0.066 | 0.0005 | -0.135 | 0.1328 | -0.017 | 0.4409 | 0.2062 | -0.037 | -0.515 | -0.385 | -0.332 |
| PCHAS_140600 | -1.377 | -1.135 | -0.835 | -0.322 | 0.0613 | 0.0962 | 0.9902 | 0.9667 | 0.2045 | 0.7519 | 0.6512 | 0.4378 |
| PCHAS_134350 | -0.848 | -1.739 | -2.159 | -2.33  | -0.59  | -0.097 | -0.807 | -0.333 | 0.0586 | 1.7997 | 1.7014 | 1.5194 |
| PCHAS_144780 | 1.2426 | 0.6293 | 0.7703 | -0.025 | -0.029 | -0.567 | 0.2    | -0.601 | -0.798 | -0.517 | 0.0704 | -0.326 |
| PCHAS_121270 | -0.405 | -0.747 | -0.899 | -0.832 | -0.147 | 0.4883 | 0.3015 | 0.9631 | 0.4911 | 0.9481 | 0.0506 | 0.9596 |
| PCHAS_061930 | 0.7295 | 0.2689 | 0.1299 | -0.364 | -0.038 | -0.485 | -0.132 | -0.477 | -0.577 | -0.53  | 0.1942 | 0.1245 |
| PCHAS_031150 | 0.4263 | 0.2551 | 0.2977 | -0.066 | 0.0412 | -0.008 | -0.915 | -0.19  | -0.143 | -0.044 | -0.609 | -0.08  |
| PCHAS_133700 | -1.089 | -0.677 | -0.711 | -0.459 | -0.031 | 0.2317 | 0.2621 | 0.7021 | 0.2003 | 0.7832 | 0.6762 | 0.597  |
| PCHAS_144130 | 0.8488 | 0.4365 | 0.2595 | 0.1143 | -0.293 | -0.523 | 0.1533 | -0.404 | -0.404 | -0.155 | 0.5468 | 0.323  |
| PCHAS_142080 | -0.495 | -0.59  | -0.661 | -0.452 | -0.401 | 0.0629 | -0.155 | 0.4512 | 0.1554 | 1.4969 | 1.5593 | 1.2754 |
| PCHAS_142200 | 0.1339 | 0.1873 | 0.1172 | 0.4236 | 0.0524 | -0.009 | 0.3332 | -0.039 | -0.164 | -0.966 | -0.664 | -0.593 |
| PCHAS_101550 | -0.618 | -0.311 | -0.337 | -0.609 | -0.291 | -0.235 | 0.0217 | 0.7409 | -0.234 | 0.4982 | 0.7312 | 0.4938 |
| PCHAS_143730 | 0.5603 | -0.182 | -0.096 | -0.019 | -0.062 | -0.354 | 0.1738 | 0.182  | -0.192 | -0.228 | 0.2972 | -0.033 |
| PCHAS_100920 | -0.555 | 0.1304 | 0.2204 | 0.2641 | 0.5861 | -0.019 | 0.0631 | -0.147 | -0.052 | -1.315 | -0.483 | -0.735 |
| PCHAS_052200 | -0.584 | -1.082 | -0.425 | -0.704 | -0.742 | 0.1439 | 0.1621 | 0.3226 | -0.028 | 0.7633 | 1.3424 | -0.035 |
| PCHAS_050770 | -0.779 | -0.425 | 0.0482 | -0.303 | 0.1218 | -0.422 | 0.5591 | 0.73   | -0.354 | -0.107 | 0.2836 | -0.219 |
| PCHAS_031340 | 1.1541 | 0.0063 | 0.5469 | -0.251 | 0.0257 | -0.487 | 0.4637 | 0.4014 | -0.38  | -0.899 | 0.5349 | -0.058 |
| PCHAS_052180 | 0.4011 | 0.1077 | 0.7973 | 0.1652 | 0.3789 | -0.142 | 1.1803 | -0.032 | -0.17  | -1.116 | -0.685 | -0.847 |
| PCHAS_062170 | -0.226 | 0.1048 | 0.0174 | -0.122 | 0.0922 | 0.1736 | 0.3304 | -0.38  | 0.1073 | -0.338 | 0.0467 | -0.213 |
| PCHAS_051600 | 0.1942 | 0.4007 | -0.113 | -0.061 | -0.212 | -0.313 | -0.808 | -0.432 | -0.569 | -0.181 | -0.368 | 0.1289 |
| PCHAS_112210 | -0.334 | -0.053 | -0.79  | 0.6161 | -0.691 | 0.5694 | 0.1523 | 0.023  | -0.03  | 0.3    | 0.2938 | 0.1308 |
| PCHAS_101750 | -0.53  | 0.1349 | 0.5979 | -0.202 | 0.0943 | 0.9516 | -0.584 | 0.6256 | 0.2233 | -0.012 | 0.1349 | 0.0146 |
| PCHAS_103090 | 0.1797 | 1.1959 | -0.775 | 0.3353 | -0.309 | 0.4778 | -0.513 | -0.028 | 0.4775 | -0.035 | 1.6199 | 0.2081 |
| PCHAS_142750 | -0.662 | 0.4933 | 0.6274 | 0.6151 | 0.2346 | -0.11  | -0.433 | -0.131 | 0.252  | -0.632 | -1.037 | -0.653 |
| PCHAS_132050 | 0.3253 | -0.292 | 0.0903 | -0.281 | 0.0919 | -0.02  | 0.8809 | 0.7252 | -0.003 | 0.6012 | 1.0911 | 0.6086 |
| PCHAS_114490 | 0.4367 | 0.2439 | 0.033  | -0.206 | -0.129 | -0.16  | -0.326 | 0.063  | -0.132 | 0.033  | 0.5841 | 0.231  |
| PCHAS_130850 | -1.049 | -0.574 | -0.52  | -0.561 | -0.116 | 0.0985 | 0.382  | 0.582  | 0.1328 | 0.6773 | -0.035 | 0.1892 |
| PCHAS_133190 | 0.0144 | 0.0234 | -0.155 | 0.1686 | 0.1898 | 0.3952 | 1.3166 | 0.5853 | 0.2805 | 0.4635 | -0.488 | 0.3597 |
| PCHAS_141890 | -1.106 | -0.11  | -0.037 | 0.0676 | -0.02  | 0.0439 | 0.1092 | 0.3341 | 0.2239 | -0.261 | -0.247 | -0.256 |
| PCHAS_130980 | 0.4628 | -0.193 | -0.1   | -0.308 | 0.1502 | 0.276  | -0.154 | 0.1418 | 0.0127 | 0.3404 | -0.305 | 0.159  |
| PCHAS_135660 | -0.589 | 0.0404 | 0.3412 | 0.2037 | 0.3045 | 0.0736 | 0.4863 | 0.104  | 0.232  | -0.847 | -0.453 | -0.743 |
| PCHAS_140870 | 0.5123 | 0.1097 | 0.2945 | -0.098 | 0.076  | -0.229 | 0.0851 | -0.088 | -0.122 | -0.31  | 0      | -0.22  |
| PCHAS_062260 | 0.0872 | 0.2362 | 0.2576 | 0.1689 | 0.0613 | 0.1676 | -0.15  | -0.039 | -0.1   | -0.019 | -0.242 | -0.109 |
| PCHAS_070720 | -0.315 | 0.1069 | 0.4792 | 0.0714 | 0.3047 | -0.298 | 0.2439 | 0.1136 | -0.151 | -1.374 | -1.174 | -1.029 |
| PCHAS_121630 | 0.1283 | 0.1782 | 0.2079 | 0.2855 | 0.0157 | -0.154 | -0.015 | -0.037 | -0.083 | -0.478 | -0.15  | -0.284 |
| PCHAS_091540 | 1.2278 | 0.1603 | 0.4506 | 0.0883 | 0.1037 | -0.087 | 0.5527 | 0.4866 | -0.34  | 0.4262 | 1.4388 | 0.0116 |
| PCHAS_010130 | -1.636 | -1.953 | -1.109 | -1.776 | -0.355 | 0.2337 | 0.621  | 1.093  | 0.4366 | 0.6585 | 0.3742 | 0.3054 |
| PCHAS_000210 | 1.2864 | 0.1259 | -0.218 | -0.762 | -0.649 | -0.427 | -1.392 | -0.282 | -0.569 | 1.1755 | 3.0531 | 0.0867 |
| PCHAS_071610 | -0.323 | -1.02  | 0.4284 | -0.726 | 0.1444 | 0.2275 | 1.2555 | 0.6972 | 0.2508 | 0.4728 | 0.6701 | -0.031 |
| PCHAS_104030 | 0.034  | 0.1689 | 0.0036 | 0.0207 | 0.0792 | -0.064 | -0.096 | -0.202 | 0.0144 | -0.317 | -0.861 | -0.007 |
| PCHAS_081980 | -0.054 | -0.35  | 0.0778 | -0.131 | 0.0368 | 0.9672 | -0.071 | 0.2879 | 0.5382 | 0.7    | 0.3255 | 0.5489 |
| PCHAS_145510 | 0.4189 | 0.1143 | 0.1236 | -0.24  | -0.155 | 0.1056 | -0.358 | -0.024 | 0.127  | 0.2332 | -0.381 | -0.082 |
| PCHAS_145580 | 0.2152 | 0.0862 | -0.042 | -0.114 | -0.182 | -0.116 | 0.1501 | 0.0761 | -0.123 | 0.799  | 1.1444 | 0.8788 |
| PCHAS_122020 | 0.3629 | 0.1578 | 0.2366 | -0.214 | -0.088 | -0.381 | -0.464 | -0.357 | -0.453 | 0.2328 | -0.033 | 0.0933 |
| PCHAS_131420 | -0.317 | 0.2322 | 0.6901 | 0.1692 | 0.4251 | -0.131 | 0.8152 | -0.436 | -0.324 | -0.949 | -0.119 | -0.971 |
| PCHAS_081720 | -0.004 | -0.038 | -0.378 | 0.0932 | -0.034 | 0.9781 | 0.2586 | 0.6199 | 0.7071 | 0.7546 | 0.9694 | 0.5951 |

|              |        |        |        |        |        |        |        |        |        |        |        |        |
|--------------|--------|--------|--------|--------|--------|--------|--------|--------|--------|--------|--------|--------|
| PCHAS_132940 | 0.9403 | 0.1629 | 0.6956 | 0.1028 | 0.229  | 0.1965 | -0.105 | 0.2909 | -0.036 | -0.161 | -0.148 | -0.445 |
| PCHAS_091940 | -0.112 | -0.5   | -0.189 | -0.304 | -0.163 | 0.0643 | 0.1517 | 0.0418 | 0.0352 | -0.487 | -0.524 | -0.543 |
| PCHAS_051360 | -0.052 | 1.3665 | 1.2644 | 0.539  | 0.1176 | 0.4549 | 0.3414 | -0.257 | 0.0923 | -0.476 | 0.2947 | -0.109 |
| PCHAS_041930 | 0.1271 | 0.2204 | 0.3672 | 0.0333 | -0.076 | -0.241 | 0.1102 | -0.093 | 0.0945 | -0.493 | 0.6037 | -0.254 |
| PCHAS_140960 | 0.2608 | -0.106 | -0.232 | -0.477 | -0.231 | -0.246 | 0.0578 | 0.4877 | -0.33  | 1.0462 | 0.454  | 0.7407 |
| PCHAS_123890 | 0.7168 | 0.5815 | 0.3644 | 0.3329 | -0.024 | -0.509 | 0.3386 | 0.5725 | -0.215 | 1.0743 | 2.0147 | 0.7343 |
| PCHAS_103200 | 0.4884 | 0.3531 | 0.4497 | 0.4271 | 0.0629 | -0.157 | 0.4889 | -0.152 | -0.073 | -0.217 | -0.309 | -0.659 |
| PCHAS_130700 | 1.5733 | 0.5439 | -1.155 | 0.5391 | -1.113 | 1.7506 | 1.7669 | 0.1185 | 1.4781 | 0.3371 | 0.6705 | 0.0178 |
| PCHAS_110300 | 0.3922 | -0.154 | -0.367 | -0.261 | -0.22  | 0.048  | 0.2299 | -0.256 | 0.1757 | 0.978  | 1.745  | 1.6735 |
| PCHAS_110130 | -1.152 | -1.017 | -0.694 | -0.643 | -0.228 | 0.1836 | 0.0639 | 0.6096 | 0.1159 | 0.7829 | 0.3284 | 0.5294 |
| PCHAS_020040 | -0.01  | 0.6126 | 0.6473 | 0.5577 | 0.1641 | -0.378 | -0.56  | -0.613 | -0.341 | -1.321 | -1.176 | -0.65  |
| PCHAS_010270 | -0.322 | 0.2186 | 0.1852 | 0.2566 | 0.1708 | -0.264 | 1.1868 | 0.077  | -0.232 | -0.438 | -0.895 | -0.447 |
| PCHAS_120400 | 0.3254 | -0.233 | -2.878 | 0.657  | -0.549 | -0.557 | -0.139 | -0.069 | 0.5436 | -0.349 | -0.598 | 0.3058 |
| PCHAS_071510 | 0.034  | 0.0357 | 0.3607 | 0.2646 | 0.1899 | -0.211 | -0.087 | 0.0443 | -0.163 | -0.149 | -0.689 | -0.36  |
| PCHAS_072910 | 0.5992 | 0.1211 | 0.1294 | 0.3298 | 0.0415 | 0.4885 | 0.0849 | 0.4794 | 0.2782 | 0.5671 | 0.0178 | 0.7326 |
| PCHAS_121940 | 0.0675 | 0.2145 | -0.487 | 0.0352 | -0.16  | -0.037 | -0.573 | -0.285 | -0.139 | -0.06  | 0.1309 | 0.1345 |
| PCHAS_030570 | -0.069 | -1.37  | -0.894 | -0.987 | -0.677 | -0.257 | 0.3404 | 0.864  | -0.208 | 1.8907 | 1.8369 | 1.5591 |
| PCHAS_135540 | 1.67   | -0.069 | -0.791 | -2.009 | -1.173 | -1.218 | -1.883 | -1.425 | -1.261 | 0.3773 | 1.0447 | 1.08   |
| PCHAS_062320 | -0.324 | -0.561 | 0.2229 | 0.1842 | 0.2777 | 0.1601 | 0.8221 | 0.1072 | 0.1139 | -0.512 | -0.45  | -0.374 |
| PCHAS_131330 | 0.7932 | -0.131 | 0.3457 | -0.547 | -0.039 | -0.282 | 0.8645 | 0.611  | 0.173  | 0.4915 | 0.2858 | -0.566 |
| PCHAS_102580 | -0.553 | -0.387 | 0.2989 | -0.272 | 0.0709 | 0.0935 | 1.0284 | 0.2062 | -0.048 | 0.3054 | 0.2965 | 0.2164 |
| PCHAS_136850 | 0.4816 | 0.2968 | 0.5002 | -0.023 | -0.052 | -0.372 | 0.1101 | 0.1451 | -0.296 | -0.432 | -0.086 | -0.301 |
| PCHAS_093400 | 1.1257 | 0.2053 | -0.674 | -0.085 | -0.38  | -0.051 | 0.8019 | 0.352  | -0.19  | 0.2436 | 1.0324 | 0.961  |
| PCHAS_121110 | -0.367 | -0.164 | -0.248 | -0.51  | -0.22  | -0.007 | 0.0163 | 0.1146 | 0.0226 | 0.9751 | 0.8568 | 0.897  |
| PCHAS_010550 | -0.201 | 0.0409 | 0.2351 | 0.1695 | 0.1141 | -0.178 | -0.067 | -0.113 | -0.384 | -0.607 | -0.541 | -0.412 |
| PCHAS_143420 | -1.13  | -0.26  | 0.5018 | 0.1907 | 0.439  | 0.8554 | -0.547 | -0.142 | 0.0523 | -0.58  | -0.619 | -0.842 |
| PCHAS_052220 | -0.529 | -1.675 | -1.245 | -1.386 | -0.54  | 0.3969 | 0.2685 | 0.5688 | 0.1885 | 0.8797 | 0.6706 | 1.0277 |
| PCHAS_104000 | -0.063 | -0.552 | -0.026 | -0.28  | -0.248 | -0.159 | -0.061 | 0.157  | -0.165 | 1.3121 | 0.7506 | 0.1846 |
| PCHAS_090490 | -0.131 | 0.4011 | 0.4701 | 0.0963 | 0.2091 | -0.012 | 0.7151 | -0.148 | 0.049  | -0.844 | -0.113 | -0.718 |
| PCHAS_092200 | 0.328  | -0.258 | 0.4404 | -0.377 | 0.2089 | -0.159 | 1.2291 | 0.7236 | -0.203 | 0.054  | 0.7232 | -0.117 |
| PCHAS_072940 | -0.275 | 0.2319 | 0.2788 | -0.047 | -0.861 | -0.115 | 0.6071 | 0.5147 | -0.319 | 0.2386 | 0.471  | 0.1316 |
| PCHAS_060430 | 0.8091 | 0.436  | 0.313  | -0.546 | -0.35  | -0.288 | -0.238 | -0.427 | -0.525 | -0.671 | 0.5828 | -0.3   |
| PCHAS_133790 | -0.253 | 0.1851 | 0.3489 | 0.3375 | 0.2701 | 0.1834 | -0.403 | -0.082 | 0.0359 | -0.552 | -0.739 | -0.49  |
| PCHAS_040880 | -0.034 | 0.1003 | 0.3276 | 0.0069 | 0.0256 | 0.0113 | 0.5143 | 0.1912 | 0.0857 | -0.394 | 0.293  | -0.549 |
| PCHAS_136770 | 0.1765 | 0.1003 | -0.044 | 0.3437 | -0.013 | 0.0895 | -0.222 | 0.0309 | 0.103  | -1.287 | -0.535 | -0.654 |
| PCHAS_051850 | -0.419 | 0.1308 | 0.4876 | 0.2154 | 0.2512 | -0.243 | -0.088 | -0.159 | -0.267 | -0.571 | -0.168 | -0.283 |
| PCHAS_135250 | -0.417 | -0.004 | -0.234 | 0.1604 | 0.0769 | 0.0822 | 0.5736 | 0.4327 | 0.1635 | 0.5502 | 0.0934 | 0.7661 |
| PCHAS_131670 | 0.4139 | 0.3214 | 0.362  | 0.2485 | -0.106 | -0.145 | -0.406 | -0.028 | -0.13  | -0.607 | -0.371 | -0.572 |
| PCHAS_082230 | -0.728 | -0.44  | 0.0138 | -0.154 | 0.0122 | 0.7998 | 0.4676 | 0.9332 | 0.8752 | 1.1797 | -0.182 | 0.5077 |
| PCHAS_020460 | -0.243 | 0.0868 | 0.0806 | -0.085 | -0.119 | -0.392 | -0.547 | 0.0641 | -0.372 | 0.0142 | 0.0262 | -0.201 |
| PCHAS_101540 | 0.1783 | 0.1589 | 0.5579 | 0.4498 | 0.1596 | 0.4766 | 0.3446 | -0.122 | 0.2355 | -0.403 | 0.3795 | -0.258 |
| PCHAS_092120 | -1.156 | -0.365 | 0.6118 | -0.022 | 0.1704 | 0.063  | 0.212  | 0.0618 | 0.0293 | -0.565 | -0.344 | -0.564 |
| PCHAS_060550 | 0.6701 | 0.0605 | 0.9064 | -0.128 | 0.1075 | 0.191  | 1.0062 | 0.43   | 0.2436 | -0.111 | 0.8839 | -0.375 |
| PCHAS_141390 | 0.0725 | -0.385 | -0.185 | -0.547 | -0.39  | -0.65  | -0.605 | 0.0046 | -0.501 | 1.704  | 1.9089 | 0.8794 |
| PCHAS_061030 | -0.06  | -0.112 | -0.312 | 0.2097 | -0.266 | 0.2489 | -0.287 | -0.722 | -0.181 | -0.03  | 1.0002 | -0.066 |
| PCHAS_145970 | 0.3084 | 0.657  | 0.544  | 0.5401 | 0.1144 | -0.174 | -0.492 | -0.985 | -0.291 | -1.757 | -1.513 | -0.996 |
| PCHAS_111310 | -0.558 | -0.057 | 0.154  | -0.033 | 0.2522 | 0.2142 | 0.649  | 0.5288 | -0.003 | 0.1452 | 0.4878 | 0.1934 |
| PCHAS_135850 | -0.206 | 0.154  | 0.539  | 0.1942 | 0.0747 | -0.287 | 0.6059 | -0.068 | -0.004 | -0.175 | -0.82  | -0.095 |
| PCHAS_020940 | 0.1821 | 0.0748 | -0.007 | -0.091 | 0.316  | -0.084 | -0.363 | -0.983 | -0.349 | -0.036 | 0.4445 | -0.082 |
| PCHAS_123340 | 0.4798 | 0.1668 | 0.4255 | 0.0084 | 0.2265 | 0.3848 | 1.2639 | 0.1029 | 0.524  | -0.07  | 0.7528 | 0.0289 |

|              |        |        |        |        |        |        |        |        |        |        |        |        |
|--------------|--------|--------|--------|--------|--------|--------|--------|--------|--------|--------|--------|--------|
| PCHAS_100960 | -0.865 | -0.311 | 0.0632 | -0.113 | -0.057 | 0.0108 | 0.0962 | 0.2427 | 0.0036 | 0.5438 | 0.1901 | 0.2158 |
| PCHAS_030850 | -0.073 | 0.0291 | 0.3053 | -0.034 | 0.0297 | -0.454 | 0.1657 | 0.199  | -0.197 | -0.148 | 0.3328 | -0.443 |
| PCHAS_100880 | 0.7375 | -0.055 | 0.447  | 0.1232 | 0.2089 | 0.1989 | 0.6372 | -0.06  | 0.0649 | -0.396 | 0.0213 | -0.079 |
| PCHAS_083460 | -0.58  | -0.775 | -0.47  | -0.049 | 0.0639 | 0.0224 | 0.1028 | 0.4282 | 0.065  | 0.4908 | -0.116 | 0.2238 |
| PCHAS_051140 | -0.257 | 0.2598 | 0.2477 | 0.6693 | 0.2545 | -0.064 | 0.0096 | -0.228 | -0.036 | -0.75  | -0.068 | -0.161 |
| PCHAS_092360 | -0.502 | 0.1639 | 0.2462 | -0.482 | 0.1097 | -0.568 | -0.245 | -0.227 | -0.454 | -1.175 | -0.386 | -0.704 |
| PCHAS_081880 | -0.695 | -0.963 | -0.487 | -0.514 | -0.248 | 0.2538 | 0.3353 | 0.5731 | 0.3334 | 0.5589 | 0.298  | 0.4886 |
| PCHAS_093340 | 0.2409 | 0.2621 | 0.8036 | 0.7438 | 0.3751 | -0.267 | -0.703 | -0.955 | -0.346 | -1.672 | -1.226 | -1.013 |
| PCHAS_062400 | -0.002 | 0.2959 | 0.5701 | 0.0253 | 0.2314 | 0.0874 | 0.3361 | 0.1903 | 0.1716 | -1.854 | -0.867 | -0.487 |
| PCHAS_122170 | 0.3981 | 0.491  | 1.2291 | 0.2263 | 0.2079 | 0.4196 | 0.6693 | 0.0814 | 0.1123 | -1.433 | -0.785 | -0.506 |
| PCHAS_061700 | 0.6866 | -0.66  | -0.407 | -0.247 | 0.1985 | 0.2169 | 0.1829 | -0.031 | 0.2455 | -0.171 | -0.117 | 0.0216 |
| PCHAS_072690 | 0.1244 | 0.3183 | 0.5955 | 0.1893 | 0.1531 | 0.0547 | 0.1152 | -0.189 | -0.015 | -0.762 | -0.649 | -0.781 |
| PCHAS_132560 | 0.2667 | 0.4099 | 0.6926 | 0.1565 | 0.1421 | -0.205 | 0.4534 | -0.511 | -0.352 | -0.158 | -0.4   | -0.484 |
| PCHAS_072180 | -0.551 | 1.0623 | 1.0637 | -0.071 | -0.004 | -0.308 | -0.059 | -0.568 | -0.17  | -0.592 | -0.363 | -0.568 |
| PCHAS_142330 | -0.277 | 0.3345 | 0.3525 | 0.107  | 0.1644 | 0.3902 | -0.295 | -0.412 | 0.0717 | -0.399 | -0.051 | -0.12  |
| PCHAS_102910 | 0.0228 | -0.192 | 0.0411 | -0.376 | 0.2411 | -0.42  | 0.4298 | 0.0058 | -0.296 | 0.1424 | -0.041 | 0.0157 |
| PCHAS_146700 | 0.3966 | 0.6307 | 0.5033 | -0.015 | -0.004 | -0.159 | -0.273 | -0.117 | -0.283 | -1.272 | -1.488 | -0.964 |
| PCHAS_112630 | 0.2249 | -0.393 | -0.355 | -0.428 | -0.167 | 0.4298 | -0.766 | -0.513 | 0.1672 | 1.6811 | 1.0493 | 1.2628 |
| PCHAS_134620 | -0.192 | 0.1137 | -0.092 | 0.0594 | 0.0539 | 0.0503 | 0.3957 | -0.155 | -0.02  | -0.541 | 0.085  | -0.468 |
| PCHAS_041080 | -0.565 | 0.5738 | 0.6578 | 0.2885 | -0.038 | 0.0091 | -0.171 | -0.071 | -0.287 | -1.392 | -0.618 | -0.658 |
| PCHAS_143880 | -0.801 | -0.464 | -0.1   | 0.0472 | 0.0951 | 0.0118 | 0.6542 | 0.0343 | -0.148 | -0.059 | -0.933 | -0.531 |
| PCHAS_051550 | -0.096 | 0.1559 | 0.1928 | -0.13  | 0.0185 | 0.2343 | 0.4494 | 0.4542 | 0.0557 | 0.4928 | 0.2434 | 0.4702 |
| PCHAS_081300 | -1.033 | -1.187 | -0.976 | -0.849 | -0.101 | 0.0337 | 0.5674 | 0.8812 | 0.2107 | 1.114  | 0.7463 | 1.0425 |
| PCHAS_102410 | 0.1431 | 0.2246 | 0.2391 | 0.2932 | 0.0769 | -0.086 | -0.373 | -0.283 | -0.674 | -0.466 | -0.913 | -0.277 |
| PCHAS_052160 | 0.989  | 0.2877 | 0.5372 | -0.107 | -0.303 | -0.632 | -0.309 | -0.701 | -0.724 | -0.877 | -0.305 | -0.945 |
| PCHAS_040290 | -0.661 | -0.598 | -0.038 | -0.537 | -0.054 | -0.253 | -0.708 | 0.0474 | -0.335 | -0.337 | 0.9869 | 0.0761 |
| PCHAS_121560 | -0.099 | 0.1741 | 0.9252 | 0.3807 | 0.1798 | -0.221 | -0.302 | 0.0472 | -0.076 | -0.39  | -0.83  | -0.357 |
| PCHAS_133110 | 0.3569 | -0.01  | -0.132 | -0.342 | -0.437 | -0.361 | -0.471 | -0.512 | -0.402 | 0.1224 | 0.6949 | 0.2408 |
| PCHAS_145680 | 0.2942 | 0.3413 | -0.261 | 0.0814 | -0.06  | -0.531 | 0.0822 | -0.049 | -0.563 | -0.211 | 0.0188 | 0.0252 |
| PCHAS_114000 | -0.549 | -0.676 | -0.792 | -0.301 | 0.1808 | 0.3942 | 0.1434 | 0.4478 | 0.5482 | -0.005 | -0.681 | -0.305 |
| PCHAS_081320 | 0.7438 | -0.011 | 0.4747 | 0.3318 | 0.0494 | -0.28  | -0.408 | -0.275 | -0.264 | -0.813 | -0.196 | -0.388 |
| PCHAS_120590 | -0.748 | -0.898 | -0.917 | -0.342 | -0.373 | -0.129 | 0.1193 | 0.2077 | -0.038 | 0.4308 | 1.4915 | -0.049 |
| PCHAS_130400 | -0.188 | -0.24  | 0.038  | -0.141 | -0.156 | -0.123 | -0.336 | -0.102 | -0.257 | -0.323 | 0.0682 | -0.224 |
| PCHAS_041590 | -0.291 | -0.321 | -0.234 | -0.18  | 0.0061 | -0.1   | 0.1684 | 0.7328 | -0.212 | 0.4114 | 0.5143 | 0.4965 |
| PCHAS_102790 | -0.396 | -0.276 | -0.161 | -0.029 | 0.0356 | 0.5035 | -0.415 | 0.9845 | 0.505  | 1.1023 | 1.2049 | 1.2184 |
| PCHAS_081610 | -0.343 | -1.622 | -1.033 | -1.659 | -0.312 | -0.145 | 1.1995 | 0.7976 | -0.438 | 1.5813 | 1.4854 | 1.386  |
| PCHAS_071570 | -0.187 | -0.56  | -0.521 | -0.226 | -0.006 | 0.4426 | 0.3934 | 0.5692 | 0.4061 | 0.8957 | 0.4198 | 0.7109 |
| PCHAS_050580 | 0.5619 | 0.2062 | 0.2652 | -0.291 | -0.15  | -0.779 | -0.086 | -0.217 | -0.655 | -1.219 | -0.067 | -0.366 |
| PCHAS_145250 | -1.591 | -2.076 | -1.91  | -1.634 | -0.595 | 0.9363 | 1.2162 | 0.8941 | 0.6667 | 0.3682 | -0.22  | -0.22  |
| PCHAS_071730 | 0.2595 | -0.159 | 0.0266 | -0.266 | -0.147 | -0.234 | -0.079 | -0.005 | -0.269 | -0.105 | 0.4087 | -0.178 |
| PCHAS_000110 | 0.0365 | -0.222 | -0.086 | 0.2129 | 0.2871 | 0.5937 | -1.104 | 0.8862 | 0.5623 | 1.1428 | -0.5   | 0.7163 |
| PCHAS_143460 | -0.289 | 0.0603 | 0.2791 | 0.0952 | 0.127  | -0.127 | 1.3105 | 0.1588 | -0.241 | -0.45  | 0.3522 | -0.028 |
| PCHAS_140740 | 0.31   | 0.309  | -0.027 | 0.0059 | 0.0982 | -0.139 | 0.6145 | 0.0391 | -0.233 | -0.739 | 0.0029 | -0.538 |
| PCHAS_083290 | -0.641 | -0.347 | -0.375 | -0.309 | -0.106 | 0.3656 | 1.2644 | 0.4105 | 0.3811 | -0.54  | -0.355 | -0.637 |
| PCHAS_031540 | -0.628 | -0.777 | -1.083 | -0.68  | -0.113 | 0.1038 | 0.4448 | 0.7686 | 0.0346 | 0.7006 | 0.7647 | 0.5946 |
| PCHAS_030320 | 0.0217 | 0.1849 | 0.0406 | 0.6405 | 0.2365 | 1.0431 | 0.0243 | 0.262  | 0.642  | -0.242 | -1.821 | -0.35  |
| PCHAS_052190 | 0.3    | 0.4637 | 0.2181 | 0.0284 | -0.401 | -0.01  | -0.765 | -0.822 | -0.253 | -0.146 | -0.03  | 0.3113 |
| PCHAS_113680 | 0.3781 | 0.3993 | 0.524  | 0.1716 | 0.1281 | -0.075 | -0.244 | 0.1143 | -0.06  | -0.155 | -0.206 | -0.138 |
| PCHAS_121430 | -0.584 | 0.4696 | 0.339  | 0.4647 | 0.2543 | -0.222 | -0.599 | -1.095 | -0.127 | -1.615 | -0.754 | -1.175 |
| PCHAS_050870 | -0.273 | 0.6501 | 0.9917 | 0.5696 | 0.2546 | 0.438  | 0.3802 | 0.0825 | 0.2441 | -0.874 | -1.614 | -0.594 |

|              |        |        |        |        |        |        |        |        |        |        |        |        |
|--------------|--------|--------|--------|--------|--------|--------|--------|--------|--------|--------|--------|--------|
| PCHAS_136150 | 0.7104 | -0.054 | 0.0201 | 0.1638 | -0.082 | -0.059 | 0.6895 | 0.5354 | -0.052 | 0.1259 | 0.0603 | 0.0974 |
| PCHAS_145070 | -1.247 | -0.203 | -0.167 | 0.3843 | 0.0378 | -0.259 | -0.107 | -0.05  | -0.187 | 0.0264 | 0.4766 | 0.1914 |
| PCHAS_112500 | 0.8097 | 0.1188 | -0.098 | 0.1318 | 0.1431 | 0.0011 | 0.3794 | -0.314 | -0.133 | -0.818 | -0.475 | -0.533 |
| PCHAS_136870 | 0.8476 | 0.6339 | 0.4493 | 0.3313 | 0.0368 | -0.539 | -2.06  | -0.751 | -0.572 | -2.112 | -2.145 | -1.556 |
| PCHAS_146770 | 0.0025 | -0.152 | -0.142 | 0.4074 | 0.0315 | 0.4689 | 0.8638 | 0.7232 | 0.3487 | 0.4574 | -0.071 | 0.0661 |
| PCHAS_121770 | -0.023 | 0.2412 | 0.739  | 0.2613 | 0.159  | -0.689 | 0.692  | -0.276 | -0.485 | -0.798 | -1.797 | -0.017 |
| PCHAS_120550 | 0.2022 | 0.0505 | -0.406 | -0.13  | 0.1728 | -0.203 | 0.3382 | 0.2232 | -0.403 | -0.273 | 0.3374 | -0.112 |
| PCHAS_010690 | -0.398 | -0.324 | -0.588 | -0.603 | -0.152 | 0.4148 | -0.379 | 0.4978 | 0.4658 | 1.2525 | 0.4266 | 1.2125 |
| PCHAS_112980 | -0.064 | 0.1927 | 0.3751 | 0.2168 | -0.091 | -0.427 | 0.267  | 0.0379 | -0.158 | 0.1716 | -0.23  | -0.839 |
| PCHAS_122670 | 0.3785 | 0.4051 | 0.4067 | 0.3205 | 0.0757 | -0.225 | -0.549 | -0.439 | -0.231 | -0.886 | -1.797 | -0.747 |
| PCHAS_081110 | -0.412 | -2.117 | -1.206 | -1.013 | -0.351 | -0.407 | 0.0044 | 0.0679 | -0.465 | 0.8567 | 0.8106 | 0.4248 |
| PCHAS_091790 | -1.072 | -1.485 | -1.071 | -0.27  | -0.042 | 0.5855 | 0.5641 | 0.7811 | 0.5022 | 0.3477 | 0.0961 | 0.4391 |
| PCHAS_071270 | 0.4447 | 0.2125 | 0.1203 | -0.08  | 0.0149 | -0.183 | -0.102 | -0.025 | -0.209 | -0.525 | -0.492 | -0.447 |
| PCHAS_102460 | 0.254  | 0.238  | 0.2627 | 0.2124 | 0.0898 | -0.119 | -0.47  | -0.217 | -0.071 | -0.184 | -0.613 | -0.221 |
| PCHAS_103760 | -0.318 | -0.223 | 0.1358 | 0.333  | 0.3143 | -0.107 | -0.075 | 0.1227 | 0.0694 | -0.583 | -0.969 | -0.54  |
| PCHAS_135490 | -0.029 | -0.055 | 0.2578 | 0.0508 | 0.0427 | 0.3011 | -0.571 | -0.069 | 0.0486 | -0.482 | -0.14  | -0.103 |
| PCHAS_072020 | -0.652 | -0.15  | 0.5864 | -0.183 | -0.056 | -0.634 | 0.0091 | 0.7958 | -0.259 | 0.9304 | 0.1949 | 0.6952 |
| PCHAS_146010 | 0.1635 | -0.087 | 0.355  | -0.484 | -0.037 | 0.0574 | 0.4341 | 0.0187 | 0.0714 | 0.1463 | 0.0811 | -0.028 |
| PCHAS_141410 | 0.0125 | 0.114  | 0.4819 | 0.2758 | 0.1273 | 0.036  | -0.114 | 0.0402 | 0.011  | -0.648 | -0.885 | -0.441 |
| PCHAS_104160 | 0.5859 | -0.193 | -0.974 | -1.519 | -1.152 | 0.5494 | 0.7442 | -0.676 | -0.741 | 1.1611 | 2.4411 | 2.1133 |
| PCHAS_132160 | -0.356 | 0.2884 | 0.4966 | 0.2111 | 0.3521 | -0.047 | 0.5832 | 0.3522 | -0.127 | -0.846 | 0.0039 | -0.664 |
| PCHAS_124100 | 0.1006 | -0.184 | -0.17  | -1.833 | -0.143 | -0.534 | -0.875 | -0.732 | -0.415 | 0.5936 | 2.1792 | -0.702 |
| PCHAS_140390 | -0.297 | -0.024 | -0.299 | -0.182 | -0.306 | -0.159 | 0.0006 | -0.187 | -0.038 | 0.5611 | 0.0206 | 0.3213 |
| PCHAS_111050 | 0.3627 | 0.1147 | 0.1199 | -0.062 | 0.1513 | 0.0238 | 0.2333 | -0.145 | 0.0645 | -0.491 | -0.631 | -0.603 |
| PCHAS_102960 | -0.745 | -0.385 | -0.117 | -0.364 | -0.038 | -0.264 | 0.7193 | 0.8098 | 0.0219 | 0.6241 | 0.5005 | 0.2693 |
| PCHAS_051760 | 0.4476 | 0.0587 | 0.0593 | -0.25  | -0.272 | -0.467 | -0.297 | -0.269 | -0.569 | -0.218 | 0.4211 | -0.269 |
| PCHAS_146060 | -0.301 | -1.466 | -1.166 | -0.996 | -0.446 | 0.4389 | 0.7917 | 0.8255 | 0.3138 | 0.9753 | 0.2906 | 0.907  |
| PCHAS_142300 | 0.6102 | 1.0281 | 0.7955 | 0.4815 | 0.3134 | 0.6262 | -0.243 | -0.393 | 0.0555 | -0.439 | -0.726 | -0.477 |
| PCHAS_040780 | -0.669 | 0.1273 | 0.25   | 0.0569 | 0.1111 | -0.217 | -0.013 | -0.623 | -0.428 | -0.834 | -0.407 | -0.849 |
| PCHAS_062380 | 0.0983 | -0.175 | -0.095 | -0.071 | 0.0629 | 0.2657 | -0.18  | 0.2081 | 0.3059 | 0.1625 | 0.0355 | 0.2867 |
| PCHAS_121010 | -0.682 | 0.2592 | 0.4147 | 0.1441 | 0.1156 | -0.104 | -0.459 | 0.0714 | 0.023  | 0.2059 | 0.3371 | 0.3257 |
| PCHAS_040840 | 1.1961 | 0.3485 | 0.6578 | 0.1046 | -0.091 | -0.449 | -0.403 | -0.871 | -0.459 | -0.546 | -0.268 | -0.661 |
| PCHAS_112840 | 0.3181 | -0.578 | -0.955 | -0.284 | -0.209 | -0.096 | 0.2207 | -0.25  | -0.173 | 1.5806 | 1.7405 | 0.906  |
| PCHAS_102620 | 0.0285 | -0.588 | -0.521 | -0.24  | -0.111 | -0.117 | -0.063 | 0.2055 | 0.045  | 0.6781 | 0.4308 | 0.7118 |
| PCHAS_061730 | -0.52  | 0.0686 | 0.2808 | -0.151 | 0.1496 | -0.265 | -0.392 | 0.0058 | -0.158 | -0.7   | -0.187 | -0.723 |
| PCHAS_090300 | -0.812 | -0.07  | 0.0309 | 0.2008 | 0.0458 | -0.241 | -0.337 | -0.098 | -0.315 | -0.604 | 0.2076 | -0.034 |
| PCHAS_060340 | -0.219 | 0.0361 | -0.111 | 0.2722 | 0.4448 | 0.1031 | -0.348 | -0.432 | 0.129  | -1.044 | -1.651 | -0.807 |
| PCHAS_112560 | -0.117 | -0.06  | 0.3162 | 0.0826 | 0.1202 | 0.6944 | 0.4195 | 0.0201 | 0.1862 | -0.47  | -0.039 | -0.371 |
| PCHAS_110350 | -0.264 | -0.007 | 0.2511 | -0.129 | -0.041 | -0.389 | 0.2995 | -0.432 | -0.419 | 0.3813 | 0.5641 | 0.6455 |
| PCHAS_144450 | 0.7136 | 0.2181 | 0.2882 | -0.051 | 0.0633 | -0.311 | -1.312 | -0.995 | -0.431 | -0.251 | -0.48  | -0.331 |
| PCHAS_090640 | 0.7277 | 0.758  | 0.5705 | 0.0008 | -0.186 | 0.0148 | -0.523 | -0.018 | -0.43  | -0.537 | 0.0742 | -0.388 |
| PCHAS_134910 | -0.072 | 0.0765 | 0.0498 | 0.2611 | -0.008 | -0.021 | -0.269 | -0.275 | -0.126 | -0.7   | -1.252 | -0.629 |
| PCHAS_050330 | 0.1618 | 0.1338 | 0.0439 | 0.1778 | 0.137  | 0.0171 | -0.464 | -0.081 | 0.0695 | -0.406 | -0.692 | -0.464 |
| PCHAS_083070 | -0.627 | -0.511 | 0.3024 | -0.054 | -0.064 | 0.378  | -0.163 | 0.1146 | 0.2012 | 0.5449 | 0.5742 | 0.4934 |
| PCHAS_123280 | -0.253 | -0.653 | -0.509 | 0.0523 | 0.0358 | 0.8422 | 0.2399 | 0.7222 | 0.9212 | 0.52   | -0.019 | 0.3898 |
| PCHAS_011020 | -1.482 | -0.902 | -0.607 | -0.214 | 0.3086 | 0.4    | 0.957  | 0.8286 | 0.4295 | 0.4115 | 0.4116 | 0.2373 |
| PCHAS_120340 | 0.47   | 0.2897 | 0.1102 | 0.1805 | 0.0544 | 0.0577 | 0.0787 | -0.145 | -0.068 | -0.406 | -1.068 | -0.092 |
| PCHAS_011160 | -0.298 | -1.496 | -1.82  | -2.171 | -0.898 | -0.067 | -1.003 | -0.816 | -0.107 | 1.9317 | 2.0388 | 1.4737 |
| PCHAS_135610 | 0.66   | -0.402 | -0.555 | -0.652 | -0.505 | -0.376 | -0.267 | -0.444 | -0.42  | 0.8086 | 2.8412 | 1.1831 |
| PCHAS_123000 | 0.3696 | -0.074 | -0.109 | 0.0108 | -0.027 | 0.0078 | -0.502 | 0.1837 | 0.1453 | 0.452  | 1.3875 | 0.5943 |

|              |        |        |        |        |        |        |        |        |        |        |        |        |
|--------------|--------|--------|--------|--------|--------|--------|--------|--------|--------|--------|--------|--------|
| PCHAS_011390 | 0.7417 | 0.402  | 0.0573 | 0.2912 | -0.166 | 0.0826 | -0.728 | -0.209 | -0.018 | 0.5558 | 0.332  | 0.4303 |
| PCHAS_122390 | -0.054 | 0.3654 | 0.5522 | 0.0985 | -0.092 | -0.091 | 0.1657 | -0.602 | -0.289 | -0.748 | -0.217 | -0.732 |
| PCHAS_111800 | -0.355 | -0.498 | -0.126 | -0.071 | -0.095 | 0.2574 | 0.085  | 0.5249 | 0.314  | 0.6655 | 0.4059 | 0.5348 |
| PCHAS_144710 | -0.689 | -0.328 | 0.1452 | 0.4339 | 0.3129 | 0.1155 | 0.523  | 0.1021 | 0.105  | -0.854 | -0.302 | -0.618 |
| PCHAS_102200 | -0.022 | -1.353 | -0.531 | -1.331 | -0.375 | -0.526 | -0.035 | -0.295 | -0.148 | 1.7106 | 2.1551 | 1.2264 |
| PCHAS_041260 | -0.563 | 0.1906 | 0.4831 | -0.022 | 0.174  | 0.1336 | 0.5182 | 0.3097 | 0.2355 | -0.507 | -0.173 | -0.691 |
| PCHAS_080150 | 0.0332 | 0.2403 | 0.268  | 0.4771 | 0.0738 | -0.264 | -1.023 | -1.043 | -0.287 | -1.437 | -1.426 | -1.305 |
| PCHAS_041750 | -0.847 | -1.726 | -1.122 | -1.111 | -0.13  | 0.3358 | 1.0683 | 0.9722 | 0.4981 | 0.2021 | 0.4739 | 0.4239 |
| PCHAS_082520 | -0.248 | -0.636 | -0.038 | -0.004 | 0.0902 | -0.09  | -0.307 | 0.1267 | -0.058 | -0.425 | 0.0025 | -0.394 |
| PCHAS_071440 | -1.038 | -0.212 | 0.1725 | 0.3925 | 0.3686 | 0.0837 | 1.2224 | -0.116 | 0.055  | -1.03  | -0.242 | -0.717 |
| PCHAS_050150 | -0.073 | -1.446 | -1.612 | -1.998 | -0.573 | -0.255 | -0.473 | -0.69  | -0.008 | 1.7488 | 1.8065 | 1.6627 |
| PCHAS_092700 | 0.0802 | -0.006 | -0.178 | -0.178 | -0.012 | -0.086 | 0.1371 | 0.2313 | 0.3789 | -0.267 | 0.2056 | 0.0507 |
| PCHAS_091230 | -0.6   | -1.782 | -1.763 | -1.845 | -0.678 | 0.373  | -0.931 | -0.973 | 0.3262 | 1.7169 | 1.4774 | 1.6554 |
| PCHAS_143200 | -0.144 | -0.201 | -0.159 | -0.056 | -0.141 | -0.221 | 0.3329 | 0.4668 | -0.292 | -0.254 | 0.2402 | -0.365 |
| PCHAS_142670 | 0.1786 | 0.0494 | 0.2165 | -0.318 | -0.216 | -0.201 | 0.1613 | 0.3795 | -0.334 | -0.109 | 0.3781 | -0.104 |
| PCHAS_100870 | 0.5806 | 0.2512 | 0.0588 | -0.421 | -0.036 | -0.577 | 0.2354 | 0.3695 | -0.267 | -0.346 | 0.2778 | -0.356 |
| PCHAS_070640 | -0.753 | -1.442 | -1.281 | -0.749 | -0.217 | -0.142 | 0.3705 | 0.71   | -0.041 | 0.8924 | 1.1555 | 0.6215 |
| PCHAS_134960 | -0.305 | 0.233  | 0.3196 | 0.1216 | 0.1483 | -0.106 | 0.2765 | 0.1303 | 0.0094 | -0.653 | -0.063 | -0.654 |
| PCHAS_141600 | 0.1181 | 0.2694 | 0.1076 | 0.0462 | -0.078 | -0.42  | -0.324 | -0.5   | -0.364 | -0.63  | -0.002 | -0.405 |
| PCHAS_134990 | -0.6   | 0.1994 | 0.2284 | 0.0149 | -0.074 | -0.404 | -0.173 | -0.32  | -0.086 | -0.418 | -0.255 | -0.373 |
| PCHAS_071820 | 0.3725 | 0.1828 | 0.6795 | 0.2884 | 0.1143 | -0.184 | 0.6549 | -0.095 | -0.245 | -0.468 | 0.073  | -0.575 |
| PCHAS_010030 | 0.8439 | 0.6436 | 0.0659 | 0.5657 | 0.0923 | -0.31  | -1.342 | -0.635 | -0.186 | -0.585 | -0.199 | -0.969 |
| PCHAS_144390 | -0.28  | 0.4269 | 0.5981 | 0.4013 | 0.0439 | -0.464 | -1.367 | -1.419 | -0.686 | -2.89  | -1.662 | -1.823 |
| PCHAS_132530 | 0.2226 | 0.0855 | -0.029 | -0.088 | -0.03  | -0.102 | 0.0291 | 0.0575 | -0.271 | -0.182 | -0.089 | 0.0744 |
| PCHAS_080480 | -0.506 | -1.738 | -2.207 | -0.995 | -0.759 | -0.049 | -0.442 | -0.722 | -0.033 | 0.1647 | 0.9468 | 0.2884 |
| PCHAS_072760 | -0.063 | 0.1496 | 0.7434 | -0.056 | 0.0266 | -0.117 | 0.2558 | 0.0007 | -0.049 | 0.0975 | 0.4394 | -0.554 |
| PCHAS_071790 | -0.487 | -0.293 | -0.787 | 0.7697 | 0.1455 | 0.4877 | 0.4396 | -0.139 | 0.2389 | 0.1439 | -0.611 | -0.196 |
| PCHAS_140110 | -0.601 | -1.816 | -1.924 | -1.409 | -0.645 | 0.5773 | 0.3756 | 0.6864 | 0.5911 | 1.7016 | 0.9923 | 1.4993 |
| PCHAS_123220 | 0.4358 | 0.7421 | 0.5614 | -0.24  | -0.294 | -0.144 | -0.966 | -0.754 | -0.309 | 0.1918 | -0.184 | 0.334  |
| PCHAS_102030 | -0.293 | -0.078 | 0.2279 | -0.267 | -0.006 | -0.228 | 0.092  | -0.084 | -0.224 | -0.461 | -0.148 | -0.623 |
| PCHAS_091850 | 0.2085 | -0.326 | 0.1211 | 0.1707 | 0.2443 | 0.0527 | -0.282 | 0.4024 | 0.2285 | 0.7726 | -0.011 | 0.4817 |
| PCHAS_072000 | -0.319 | 0.138  | 0.4897 | -0.079 | 0.047  | 0.2182 | -1.155 | 0.3093 | -0.368 | -0.16  | 0.3307 | -0.451 |
| PCHAS_140350 | -1.303 | -0.53  | 0.01   | -0.222 | -0.079 | -0.079 | 0.2319 | 0.578  | -0.116 | 0.2154 | -0.094 | 0.2041 |
| PCHAS_030890 | -0.482 | -0.65  | -0.845 | -0.656 | -0.306 | 0.0404 | -0.052 | 0.3469 | -0.104 | 1.384  | 1.4303 | 1.1623 |
| PCHAS_133440 | 1.1902 | 0.4599 | 0.1501 | -1.094 | -0.664 | -0.343 | -0.691 | -0.51  | -0.501 | 0.5797 | 0.5864 | 0.7764 |
| PCHAS_101450 | -0.672 | -1.903 | -1.508 | -0.513 | -0.571 | -0.442 | 0.0369 | -0.148 | -0.31  | -0.299 | 0.5214 | -0.304 |
| PCHAS_092480 | -1.041 | -1.232 | -0.59  | -0.044 | 0.5018 | 0.5539 | 0.3542 | 0.7551 | 0.8565 | -1.027 | -0.968 | -0.976 |
| PCHAS_144100 | -0.688 | -1.467 | -1.458 | -1.725 | -0.899 | -0.101 | -0.654 | -0.27  | -0.114 | 1.7963 | 1.6791 | 1.6096 |
| PCHAS_114110 | 0.1317 | 0.02   | 0.1566 | -0.01  | -0.274 | 0.1723 | 0.5565 | -0.106 | 0.1649 | 0.165  | -0.171 | 0.3699 |
| PCHAS_080760 | -0.044 | -0.212 | 0.0475 | 0.2637 | 0.3445 | 0.2603 | 0.4391 | -0.338 | 0.2123 | -0.963 | -0.513 | -0.838 |
| PCHAS_062210 | 0.1427 | 0.0199 | 0.0427 | -0.415 | -0.353 | -0.485 | -0.276 | -0.283 | -0.453 | 0.0488 | 2.5542 | 0.3462 |
| PCHAS_110630 | -0.671 | -0.16  | -0.902 | 0.5959 | 0.2931 | 0.6227 | 0.5833 | 0.0049 | 0.503  | -0.226 | 0.0985 | -0.336 |
| PCHAS_133420 | -0.104 | 0.0342 | 0.3001 | 0.0899 | 0.1736 | 0.3556 | 0.4887 | 0.1461 | 0.3324 | -0.35  | -0.565 | -0.038 |
| PCHAS_121000 | -0.491 | 0.0624 | 0.3212 | 0.6312 | 0.2098 | 0.2812 | 1.3587 | 0.2952 | -0.392 | -0.579 | 0.0478 | -0.242 |
| PCHAS_020520 | 0.465  | -0.014 | 0.1368 | 0.2701 | 0.1646 | 0.3569 | 0.3188 | -0.003 | 0.2021 | -0.288 | -0.76  | -0.134 |
| PCHAS_081940 | -2.175 | -1.679 | -0.69  | -0.237 | 0.132  | 0.7136 | 1.0795 | 0.7199 | 0.7857 | 0.0714 | -0.183 | -0.518 |
| PCHAS_070610 | -0.768 | -0.13  | 0.2234 | 0.059  | -0.114 | -0.259 | 0.0701 | 0.3449 | -0.439 | -0.455 | 0.3442 | -0.623 |
| PCHAS_061740 | -0.187 | 0.0964 | 0.5511 | 0.0563 | 0.0212 | -0.179 | -0.193 | -0.322 | -0.083 | -0.668 | -1.017 | -0.541 |
| PCHAS_100160 | -0.073 | 0.1082 | 0.1681 | 0.4712 | 0.1999 | -0.085 | 0.0509 | -0.21  | -0.088 | -0.682 | -0.651 | -0.685 |
| PCHAS_001090 | 0.3888 | -0.102 | 0.3768 | 0.1866 | 0.0458 | 0.3286 | 0.7306 | 0.9419 | 0.287  | 0.9166 | 0.6852 | 0.4709 |

|              |        |        |        |        |        |        |        |        |        |        |        |        |
|--------------|--------|--------|--------|--------|--------|--------|--------|--------|--------|--------|--------|--------|
| PCHAS_081670 | 0.0304 | 0.4584 | 0.4254 | 0.3153 | 0.0646 | 0.0402 | 0.0075 | -0.62  | -0.006 | -1.103 | -0.669 | -0.902 |
| PCHAS_123390 | 0.3    | 0.1624 | -0.259 | 0.1318 | 0.1308 | 0.5236 | -0.21  | -0.056 | 0.2255 | 0.0741 | -0.397 | -0.035 |
| PCHAS_010420 | 0.5541 | 1.2785 | 0.9544 | 0.1519 | 0.2842 | -0.204 | 0.3167 | -0.436 | -0.139 | -1.124 | -1.049 | -0.136 |
| PCHAS_011190 | -1.282 | -0.33  | 0.3655 | 0.2726 | 0.2645 | 0.2546 | 0.171  | 0.2599 | 0.4176 | -0.857 | -0.36  | -0.736 |
| PCHAS_122530 | -0.248 | 0.3465 | -0.191 | 0.2505 | 0.2478 | -0.213 | -0.505 | -0.424 | -0.151 | -0.749 | -2.752 | -0.665 |
| PCHAS_071350 | -0.047 | 0.2954 | 0.1899 | 0.2937 | 0.273  | -0.318 | -0.198 | -0.652 | -0.352 | -1.379 | -1.064 | -0.647 |
| PCHAS_091520 | 0.5655 | 0.0863 | 0.0594 | -0.203 | -0.321 | -0.415 | -0.449 | -0.269 | -0.491 | 0.5054 | 0.8582 | 0.3846 |
| PCHAS_130510 | -0.894 | -0.373 | 0.1461 | -0.023 | 0.178  | 0.7137 | -0.481 | 0.2164 | 0.1387 | 0.5635 | 0.0636 | 0.5549 |
| PCHAS_141870 | -0.12  | -0.452 | -0.327 | -0.292 | -0.028 | 0.9437 | -0.573 | 0.2932 | 0.6789 | 0.7096 | -0.361 | 0.6919 |
| PCHAS_081500 | 0.3263 | -0.01  | 0.1363 | 0.1103 | 0.087  | -0.164 | 0.5755 | -0.041 | -0.172 | -0.788 | -0.719 | -0.431 |
| PCHAS_071110 | 0.1081 | 0.2052 | 0.1923 | -0.074 | 0.1411 | -0.102 | -0.187 | 0.1198 | -0.358 | -0.074 | 0.7622 | 0.1119 |
| PCHAS_021370 | -0.759 | -1.059 | -1.133 | -1.815 | -0.634 | 0.2581 | -0.86  | -0.705 | 0.1638 | 1.7141 | 1.4623 | 1.754  |
| PCHAS_092810 | 0.1293 | 0.1455 | -0.02  | -0.337 | -0.303 | -0.292 | -0.361 | -0.24  | -0.056 | -0.439 | -0.336 | -0.389 |
| PCHAS_146600 | -0.274 | -0.033 | -0.193 | 0.2873 | 0.4539 | 0.0941 | 0.6891 | 0.1527 | 0.118  | -0.563 | -1.674 | -0.548 |
| PCHAS_124590 | -0.325 | -1E-03 | 0.0654 | -0.118 | -0.122 | 0.0724 | -0.232 | -0.335 | -0.132 | 0.693  | 0.8386 | 0.4794 |
| PCHAS_103340 | 0.3524 | 0.2278 | -0.06  | -0.208 | -0.07  | 0.0378 | -0.333 | -0.205 | -0.122 | 0.0874 | 0.0051 | 0.3165 |
| PCHAS_071190 | 0.3008 | 0.5957 | 0.572  | 0.196  | 0.2045 | -0.369 | 0.2093 | -0.241 | -0.098 | -0.92  | 0.2512 | -0.084 |
| PCHAS_010790 | -0.817 | 0.0304 | 0.0746 | 0.5159 | 0.3042 | 0.0326 | -0.223 | -0.55  | 0.042  | -1.599 | -0.958 | -1.104 |
| PCHAS_083600 | -0.284 | 0.3306 | -0.021 | -0.125 | #####  | 0.6607 | 0.1506 | 0.6665 | 0.5529 | 1.5285 | 0.3449 | 1.1029 |
| PCHAS_020250 | -0.287 | 0.3533 | 0.4209 | 0.103  | 0.1825 | 0.8957 | 0.9685 | 0.1584 | 0.2526 | -0.253 | 0.2511 | -0.204 |
| PCHAS_061580 | -0.895 | -0.34  | -0.104 | -0.067 | 0.2598 | 0.0489 | 0.9445 | 0.4221 | 0.1418 | -0.365 | -0.021 | -0.491 |
| PCHAS_083340 | -0.833 | -0.411 | 0.0427 | 0.1763 | 0.2404 | 0.1768 | 0.4826 | 0.1552 | 0.1787 | -0.893 | -0.42  | -0.927 |
| PCHAS_070840 | -0.315 | -1.063 | -1.223 | -0.955 | -1.609 | -0.547 | -0.252 | 0.4783 | -0.198 | 0.841  | 1.6728 | 0.482  |
| PCHAS_135270 | 0.4772 | 0.4335 | 0.2839 | -0.097 | 0.0264 | -0.357 | 0.4233 | -0.024 | -0.44  | -0.619 | 0.7301 | -0.341 |
| PCHAS_010320 | -0.639 | 0.124  | -0.102 | 0.3576 | 0.0863 | -0.259 | -0.164 | -0.224 | -0.391 | -1.209 | -1.028 | -0.64  |
| PCHAS_101940 | 0.1867 | 0.0135 | 0.1701 | 0.2737 | 0.1301 | -0.293 | -0.267 | -0.388 | -0.233 | -0.522 | -0.419 | -0.34  |
| PCHAS_121320 | 0.5099 | -0.553 | -0.482 | -0.587 | -0.429 | -0.096 | -0.564 | -0.587 | -0.147 | 1.6393 | 1.8046 | 0.8916 |
| PCHAS_114600 | -0.129 | -0.167 | 0.4467 | 0.7679 | 0.221  | 1.0528 | -0.151 | 0.5679 | 0.5911 | 0.3874 | 0.5225 | 0.565  |
| PCHAS_120180 | -0.371 | -0.744 | -0.366 | -0.285 | 0.042  | 0.441  | 0.3861 | 0.4675 | 0.083  | 0.4875 | -0.341 | 0.1019 |
| PCHAS_141630 | -0.295 | -0.473 | 0.3954 | -0.018 | 0.0953 | -0.211 | 0.7026 | 0.4925 | -0.011 | 0.6213 | 0.932  | 0.491  |
| PCHAS_123290 | 0.139  | 0.5101 | 0.4657 | 0.302  | 0.0912 | -0.102 | -0.305 | 0.0571 | -0.28  | -0.096 | -0.373 | 0.167  |
| PCHAS_000650 | -0.392 | -1.014 | -1.076 | -0.83  | -0.397 | 0.5874 | -0.571 | 1.2121 | 0.5586 | 1.8945 | 0.6168 | 1.1361 |
| PCHAS_120310 | -0.145 | -0.055 | 0.0614 | -0.026 | 0.033  | -0.177 | -0.041 | -0.119 | -0.356 | -0.658 | -0.203 | -0.388 |
| PCHAS_080510 | -0.046 | -0.101 | 0.1968 | -0.208 | -0.002 | -0.027 | 0.4761 | 0.0329 | -0.083 | -0.474 | -0.255 | -0.782 |
| PCHAS_090680 | -0.128 | -1.039 | -1.272 | -0.75  | -0.206 | 0.0312 | 0.1879 | -0.002 | 0.0173 | 1.9829 | 1.8808 | 1.7756 |
| PCHAS_145990 | -0.388 | 0.0613 | 0.3446 | 0.2694 | 0.2254 | -0.127 | 0.1035 | -0.263 | -0.147 | -0.85  | -1.58  | -0.461 |
| PCHAS_061100 | 0.1363 | -0.118 | 0.1183 | -0.164 | -0.111 | 0.1442 | 0.3435 | 0.1248 | 0.0088 | 0.2857 | 0.8541 | 0.2766 |
| PCHAS_110210 | -0.337 | 0.0602 | -0.533 | 0.0622 | -0.158 | -0.008 | -0.371 | -0.133 | -0.183 | -0.592 | -0.345 | -0.644 |
| PCHAS_130500 | 0.0325 | 0.0561 | 0.6884 | 0.1558 | 0.2419 | -0.096 | -0.076 | -0.092 | -0.144 | -0.477 | -0.839 | -0.379 |
| PCHAS_123130 | -0.198 | 0.2045 | 0.5488 | -0.006 | 0.2816 | 0.3672 | -0.099 | 0.1506 | -0.087 | -0.362 | -0.82  | -0.561 |
| PCHAS_102480 | -0.754 | -0.386 | -0.793 | 0.0921 | -0.234 | 0.3257 | -0.884 | -0.056 | 0.0667 | 0.0628 | -0.323 | -0.313 |
| PCHAS_010360 | -0.059 | -0.102 | -0.889 | -0.664 | 0.0085 | 0.5344 | -0.482 | -0.414 | 0.2302 | 1.0925 | 1.0495 | 1.0296 |
| PCHAS_145150 | 0.1978 | -0.082 | -0.118 | -0.639 | -0.334 | -0.288 | -0.476 | -0.076 | -0.168 | 0.1181 | 0.6173 | -0.114 |
| PCHAS_135910 | 0.1162 | -0.116 | 0.128  | -0.1   | -0.093 | -0.124 | 0.1835 | -0.009 | -0.185 | -0.231 | 0.0423 | -0.302 |
| PCHAS_101850 | -1.463 | -1.292 | -0.45  | -1.275 | -0.536 | 0.3628 | 0.1585 | 0.5508 | 0.0367 | 0.8149 | 0.2951 | 0.5387 |
| PCHAS_112310 | 0.0328 | -0.396 | -0.082 | -0.042 | 0.2233 | -0.202 | 1.4718 | 0.9891 | -0.195 | 0.1924 | 0.5542 | 0.1492 |
| PCHAS_080860 | 1.1562 | -0.326 | -0.373 | -0.713 | -0.737 | -0.804 | -0.005 | 0.1507 | -0.646 | -0.066 | 1.204  | -0.209 |
| PCHAS_082650 | 0.0124 | -0.843 | -0.286 | -0.013 | -0.255 | 0.3583 | 1.1183 | 0.8324 | 0.2751 | 0.2666 | 0.3273 | 0.0074 |
| PCHAS_060950 | 0.3146 | -0.338 | -0.336 | -0.687 | -0.04  | 0.6467 | -0.318 | 0.1096 | 0.6471 | 0.609  | -0.331 | 0.4807 |
| PCHAS_041770 | -0.058 | 0.16   | 0.1084 | -0.053 | 0.1881 | 0.0131 | -0.158 | -0.467 | -0.235 | -0.88  | -0.402 | -1.092 |

|              |        |        |        |        |        |        |        |        |        |        |        |        |
|--------------|--------|--------|--------|--------|--------|--------|--------|--------|--------|--------|--------|--------|
| PCHAS_091530 | 0.124  | 0.1494 | -0.201 | 0.0776 | 0.2262 | 0.3489 | 0.5904 | 0.6685 | 0.4418 | 0.1212 | -0.046 | 0.2255 |
| PCHAS_135600 | 0.0238 | -0.664 | -0.394 | -0.526 | -0.198 | 0.099  | -0.145 | -0.105 | 0.1631 | 1.1721 | 1.1809 | 0.9247 |
| PCHAS_081190 | -0.361 | 0.7087 | 0.6853 | 0.6453 | 0.3185 | 0.1392 | -0.553 | -0.203 | 0.2335 | -0.722 | -2.335 | -0.044 |
| PCHAS_143090 | -0.438 | 0.5032 | 0.4294 | 0.1065 | 0.0923 | -0.186 | 0.9415 | 0.1102 | -0.008 | -0.686 | -0.008 | -0.868 |
| PCHAS_120560 | 0.1385 | 0.5816 | 0.5014 | 0.1106 | -0.149 | -0.29  | -0.434 | -0.742 | -0.484 | -1.372 | -0.512 | -0.855 |
| PCHAS_091590 | -0.151 | -0.719 | -0.285 | -0.627 | -0.362 | 0.3501 | 0.0266 | 0.6522 | 0.1432 | 1.3124 | 0.991  | 1.2892 |
| PCHAS_136840 | -0.124 | -0.288 | -0.434 | -0.24  | 0.0442 | 0.7868 | 0.3158 | 0.5159 | 0.5397 | 0.3583 | 0.0359 | 0.2411 |
| PCHAS_050670 | -1.005 | -1.093 | -1.319 | -0.308 | 0.1895 | 0.4668 | 0.6083 | 0.4821 | 0.6488 | 0.0128 | -0.472 | 0.477  |
| PCHAS_111380 | 0.4134 | 0.3153 | -0.919 | 0.653  | 0.1337 | 0.3681 | 0.4449 | -0.34  | 0.3004 | -0.573 | 0.3604 | -0.129 |
| PCHAS_143660 | 0.136  | -0.666 | -0.116 | -0.251 | 0.0564 | 0.3315 | -0.733 | 0.1394 | 0.4492 | 0.828  | -0.286 | 0.6546 |
| PCHAS_135200 | -0.708 | -0.154 | 0.2381 | 0.0374 | 0.0183 | 0.0152 | 0.7664 | 0.0393 | -0.065 | -0.296 | -0.338 | 0.1193 |
| PCHAS_136240 | 0.7794 | 0.346  | 0.0063 | -0.095 | -0.12  | -0.587 | -0.718 | -0.85  | -0.568 | -0.949 | -0.719 | -1.185 |
| PCHAS_122430 | 0.4817 | 0.5001 | 0.3601 | 0.4295 | 0.2327 | -0.284 | -0.618 | -0.16  | -0.218 | -0.56  | -1.525 | 0.3819 |
| PCHAS_050500 | 0.6156 | 0.3094 | 0.4349 | -0.026 | -5E-04 | -0.327 | -0.65  | -0.39  | -0.293 | 0.2465 | -0.581 | -0.03  |
| PCHAS_101800 | -0.479 | -0.468 | -0.385 | -0.479 | -0.173 | 0.0425 | 0.8016 | 0.2701 | -0.025 | 0.6983 | 0.1195 | 0.827  |
| PCHAS_132700 | 0.2229 | 0.1333 | 0.3311 | -0.009 | 0.192  | -0.163 | 0.1115 | 0.0787 | -0.166 | -0.392 | 0.2683 | -0.261 |
| PCHAS_104150 | 0.894  | 0.1226 | -1.289 | -1.416 | -1.257 | -0.527 | -1.805 | -0.981 | -0.607 | 0.2669 | 1.9056 | 1.6152 |
| PCHAS_113510 | 0.129  | 0.0467 | -0.151 | 0.4828 | 0.0683 | -0.298 | -0.005 | -0.19  | -0.242 | -1.225 | -1.152 | -0.877 |
| PCHAS_144350 | 0.3065 | 0.4068 | 0.6451 | 0.1464 | -0.141 | -0.645 | -0.59  | -1.02  | -0.543 | -1.318 | -0.162 | -0.776 |
| PCHAS_121950 | 0.4755 | 0.4179 | 0.5708 | -0.099 | -0.23  | -0.296 | -0.58  | -0.475 | -0.643 | -0.261 | -0.507 | -0.407 |
| PCHAS_082660 | 0.7788 | 0.0224 | 0.0965 | 0.3383 | 0.0811 | -0.157 | 0.2539 | 0.3842 | -0.134 | 0.1647 | 0.3991 | -0.02  |
| PCHAS_134520 | 0.0018 | 0.307  | 0.6678 | 0.4011 | 0.1994 | -0.253 | 0.3048 | -0.25  | -0.255 | -0.732 | -0.522 | -0.385 |
| PCHAS_081350 | 0.7651 | 0.2296 | 0.6999 | 0.2411 | 0.1262 | 0.2778 | 0.6815 | -0.254 | -0.126 | -2.141 | -0.648 | -0.762 |
| PCHAS_081830 | -0.053 | -0.855 | -0.674 | -0.521 | -0.123 | 0.5556 | 0.2781 | 0.7876 | 0.6884 | 1.1352 | 0.2014 | 0.7531 |
| PCHAS_142560 | 0.538  | 0.303  | 0.5171 | 0.2943 | -0.001 | -0.436 | 0.0928 | -0.18  | -0.374 | -0.586 | -0.681 | -0.396 |
| PCHAS_110750 | 0.4526 | -0.263 | -0.87  | -0.077 | -0.269 | 0.2574 | 0.4377 | 0.3911 | 0.1759 | 0.7121 | 1.7666 | 0.5355 |
| PCHAS_132000 | 0.4381 | 0.1861 | 0.2099 | 0.2037 | 0.0672 | -0.303 | 0.0197 | -0.15  | -0.315 | -1.184 | -0.651 | -0.936 |
| PCHAS_103080 | 0.6732 | 0.3998 | 0.1274 | 0.1712 | 0.0758 | 0.0122 | -0.161 | -0.345 | -0.146 | -0.765 | -0.147 | -0.45  |
| PCHAS_090900 | 0.7622 | 0.7433 | 0.8167 | 0.1389 | 0.0504 | 0.0887 | 0.0329 | -0.692 | -0.183 | -1.159 | -0.314 | -0.513 |
| PCHAS_144490 | -1.351 | -0.604 | -0.453 | 0.4097 | 0.1007 | 0.1714 | 0.1812 | 0.6361 | 0.1084 | -0.336 | 0.2371 | -0.512 |
| PCHAS_146430 | 0.9591 | 0.545  | -0.326 | 0.4415 | -0.578 | 0.0996 | -0.766 | -0.813 | -0.154 | -0.032 | 0.1866 | -0.233 |
| PCHAS_113440 | -0.088 | -0.451 | -0.62  | -0.577 | -0.14  | 0.335  | 0.1152 | 0.319  | 0.3623 | 0.4748 | -0.15  | 0.2911 |
| PCHAS_124110 | 0.4285 | -0.603 | -1.089 | -0.034 | -0.607 | 0.4546 | -0.714 | -0.136 | 0.3842 | 1.1292 | 1.0869 | 1.2427 |
| PCHAS_145960 | -0.029 | 0.3273 | 0.4054 | 0.3627 | 0.0357 | -0.362 | -0.72  | -0.84  | -0.471 | -1.179 | -0.775 | -0.733 |
| PCHAS_102130 | 0.14   | -0.457 | 0.0174 | 0.0138 | 0.092  | -0.185 | 0.2391 | 0.1851 | -0.167 | -0.315 | 0.4749 | -0.097 |
| PCHAS_133540 | 0.1078 | -0.112 | 0.1021 | -0.028 | 0.1315 | 0.0834 | 0.1206 | 0.1351 | -0.008 | -0.53  | -0.299 | -0.071 |
| PCHAS_133050 | 0.9128 | 0.6122 | 0.1001 | 0.0523 | -0.312 | -0.654 | -0.786 | -0.657 | -0.634 | 0.0358 | 1.5542 | 0.3374 |
| PCHAS_040330 | -0.965 | -0.757 | -0.455 | -0.175 | 0.1233 | 0.4366 | 1.0545 | 0.6848 | 0.5279 | -0.183 | -0.208 | -0.37  |
| PCHAS_140760 | -0.38  | 0.7254 | 0.3764 | 0.3953 | 0.1748 | 0.0839 | -0.067 | -0.257 | 0.0605 | -1.045 | -0.593 | -0.449 |
| PCHAS_100860 | -0.045 | -0.032 | -0.084 | 0.0874 | -0.179 | -0.059 | 0.1369 | -0.279 | -0.029 | -0.714 | -0.258 | -0.17  |
| PCHAS_052100 | 0.0534 | -0.073 | 0.1981 | -0.492 | -0.144 | 0.3123 | -0.536 | 0.168  | -0.481 | 0.7507 | 0.7459 | 0.8367 |
| PCHAS_122250 | 0.5226 | 0.4477 | -0.458 | 0.3791 | -0.415 | -0.682 | -0.784 | -0.209 | -0.492 | 0.1906 | 0.3664 | 0.7393 |
| PCHAS_052300 | 0.1577 | 0.3102 | 0.483  | 0.5989 | 0.1542 | 0.5894 | -0.302 | 0.1356 | 0.5102 | -0.121 | -0.322 | -0.113 |
| PCHAS_142490 | 0.0229 | -0.894 | -0.154 | -0.601 | -0.02  | 1.018  | -0.404 | 0.0281 | 0.422  | 1.5173 | 0.8663 | 1.258  |
| PCHAS_041640 | -0.031 | 0.1729 | -0.1   | 0.1069 | 0.0031 | 0.0638 | 0.4783 | -0.09  | 0.1252 | -0.207 | -0.829 | -0.147 |
| PCHAS_061540 | 0.3749 | 0.3639 | -0.229 | 0.5013 | 0.2992 | -0.198 | 0.1513 | -0.082 | -0.093 | -0.31  | -0.983 | -0.277 |
| PCHAS_071970 | 0.2551 | 0.1704 | 0.3187 | 0.2237 | 0.1651 | -0.045 | 0.4297 | -0.159 | -0.064 | -1.013 | -0.321 | -0.712 |
| PCHAS_102720 | -0.099 | -0.744 | -0.771 | -0.537 | -0.123 | -0.041 | 0.7586 | 0.8674 | 0.0494 | 0.6836 | 0.4978 | 0.4305 |
| PCHAS_083380 | 0.3005 | 0.5327 | 0.4483 | 0.2992 | -0.15  | 0.19   | -0.51  | -0.072 | -0.052 | 0.3752 | -0.107 | 0.2378 |
| PCHAS_010230 | 0.6494 | 0.2709 | -1.38  | 0.4356 | -0.486 | 0.7275 | -0.103 | -0.843 | -0.374 | -0.446 | -0.589 | -0.539 |

|              |        |        |        |        |        |        |        |        |        |        |        |        |
|--------------|--------|--------|--------|--------|--------|--------|--------|--------|--------|--------|--------|--------|
| PCHAS_080300 | -0.144 | 0.3385 | 0.1979 | 0.263  | 0.0575 | -0.393 | -0.607 | -0.349 | -0.247 | -0.309 | -0.367 | -0.557 |
| PCHAS_010440 | -1.112 | -0.151 | 0.0744 | 0.4549 | 0.4254 | 0.7687 | 0.4507 | 0.0954 | 0.3041 | -0.672 | -0.408 | -0.629 |
| PCHAS_070150 | 0.7537 | 0.3319 | 0.2591 | -0.098 | -0.162 | 0.148  | -0.452 | -0.465 | 0.0319 | 0.0889 | 0.6283 | 0.65   |
| PCHAS_082890 | -0.789 | -0.639 | -0.727 | -0.457 | -0.09  | 0.1507 | 0.5955 | 0.5729 | 0.2692 | 0.5942 | 0.4166 | 0.5018 |
| PCHAS_122940 | 0.891  | 0.4202 | 0.8562 | 0.275  | 0.1527 | 0.2696 | -0.119 | -0.469 | -0.061 | -0.859 | 0.2535 | -0.336 |
| PCHAS_050430 | 0.3433 | -0.437 | 0.0798 | 0.019  | 0.065  | 0.5518 | -0.451 | -0.147 | 0.2192 | 0.2365 | 0.5824 | 0.1314 |
| PCHAS_142270 | 0.5023 | 0.0572 | -0.045 | -0.117 | -0.316 | -0.103 | -0.24  | 0.2252 | -0.244 | 0.8435 | 1.5267 | 1.0905 |
| PCHAS_131360 | 0.1799 | -0.062 | 0.0783 | -0.154 | -0.12  | 0.0166 | -0.087 | -0.002 | -0.128 | 0.4607 | 0.5411 | 0.3371 |
| PCHAS_132970 | -0.513 | 0.0923 | 0.0808 | 0.3627 | -0.013 | -0.084 | 0.2144 | -0.233 | 0.3087 | -0.645 | -0.295 | -0.634 |
| PCHAS_101320 | 0.2203 | 0.5494 | 0.349  | 0.3893 | 0.1073 | -0.316 | 0.2143 | -0.351 | -0.287 | -1.222 | -0.919 | -0.8   |
| PCHAS_093180 | -0.084 | -0.24  | 0.1963 | 0.2407 | 0.1481 | 0.0895 | -0.461 | 0.1795 | 0.1468 | -0.286 | -0.816 | -0.246 |
| PCHAS_041320 | 0.7544 | 0.0927 | 0.4576 | -0.458 | -0.043 | -0.164 | 0.9632 | 0.1126 | -0.153 | 0.2813 | 0.8083 | 0.2457 |
| PCHAS_030770 | -0.322 | -0.132 | 0.4239 | 0.3121 | 0.1503 | 0.0856 | 0.4385 | 0.281  | 0.0123 | -0.356 | -0.181 | -0.137 |
| PCHAS_041710 | 0.6984 | 0.5661 | 0.2311 | 0.2877 | 0.0237 | -0.211 | -0.456 | -0.805 | -0.369 | -0.976 | -0.34  | -0.629 |
| PCHAS_136220 | 0.7104 | 0.1075 | 0.338  | 0.0073 | 0.0613 | -0.144 | 0.5056 | -0.014 | -0.171 | -0.011 | -0.451 | 0.0004 |
| PCHAS_131210 | -0.029 | 0.3026 | 0.0791 | 0.2116 | 0.1874 | -0.18  | -0.277 | -0.521 | -0.129 | -0.952 | -0.926 | -0.715 |
| PCHAS_092300 | -0.708 | -0.789 | -0.732 | -1.281 | -0.559 | 0.1937 | 0.3145 | 0.4457 | 0.0081 | 0.8734 | 1.0487 | 0.5388 |
| PCHAS_140630 | 0.9426 | -0.082 | -0.082 | 0.1224 | 0.0625 | 0.0929 | 0.472  | -0.207 | 0.1869 | -0.936 | 0.2824 | -0.236 |
| PCHAS_090120 | -0.205 | 0.1858 | 0.4613 | 0.3437 | 0.1931 | -0.152 | -0.778 | -0.418 | -0.143 | -1.349 | -1.91  | -1.284 |
| PCHAS_082220 | -0.378 | 0.1598 | 0.4354 | 0.1316 | 0.0899 | -0.277 | 0.4235 | 0.0506 | -0.127 | -0.744 | 0.0471 | -0.859 |
| PCHAS_141330 | -0.829 | -0.611 | -0.442 | -0.255 | 0.1844 | 0.3051 | 0.9575 | 0.7653 | 0.404  | 0.6745 | 0.6652 | 0.0732 |
| PCHAS_144310 | -0.783 | -0.087 | 0.2448 | 0.3433 | 0.3969 | 0.2333 | 0.3313 | 0.1509 | 0.3441 | -0.904 | -0.53  | -0.811 |
| PCHAS_130860 | -0.538 | -0.523 | -0.209 | -0.516 | -0.12  | 0.2854 | -0.4   | 0.1626 | 0.1922 | 1.2382 | 0.9582 | 1.0589 |
| PCHAS_060680 | -0.154 | -0.518 | 0.5123 | -0.335 | -0.138 | -0.294 | -0.32  | -0.244 | -0.014 | 0.9012 | 0.8969 | 0.8527 |
| PCHAS_020610 | 0.312  | -0.102 | -0.527 | 0.3781 | -0.02  | 0.3129 | 0.5157 | 0.2083 | 0.4222 | -0.721 | -0.864 | -0.386 |
| PCHAS_135720 | -0.021 | 0.3922 | 0.6953 | 0.3785 | 0.3042 | 0.2344 | 0.1041 | -0.549 | -0.013 | -0.276 | -0.461 | -0.207 |
| PCHAS_113320 | 0.334  | 0.161  | 0.2603 | 0.1652 | 0.2368 | 0.0899 | -0.283 | -0.077 | 0.0631 | -0.119 | -0.608 | -0.119 |
| PCHAS_082260 | -0.321 | -1.579 | -1.045 | -0.872 | -0.704 | 0.3614 | 0.0807 | -0.16  | -0.092 | 0.682  | 0.7652 | 0.7674 |
| PCHAS_131930 | -0.046 | -0.237 | 0.5249 | 0.1323 | 0.0975 | -0.291 | 0.0027 | 0.4901 | -0.515 | 1.0958 | 0.4993 | 0.5102 |
| PCHAS_120260 | 0.1253 | 0.1897 | 0.6093 | 0.373  | 0.1669 | -0.186 | 0.5351 | 0.0812 | -0.23  | -0.363 | -0.028 | -0.844 |
| PCHAS_121740 | -0.351 | 0.4191 | 0.3566 | 0.193  | 0.0099 | 0.1824 | 0.3927 | -0.48  | -0.064 | -0.186 | -1.106 | -0.205 |
| PCHAS_040800 | 0.1463 | 0.298  | 0.3406 | 0.1017 | 0.0516 | 0.0034 | 0.243  | -0.012 | 0.0359 | -0.352 | -0.231 | -0.331 |
| PCHAS_010290 | 0.5875 | 0.038  | 0.0044 | 0.3409 | 0.1202 | -0.126 | -0.581 | -0.744 | -0.259 | -1.669 | -1.029 | -1.324 |
| PCHAS_122320 | 0.769  | 0.2681 | -0.137 | 0.2367 | 0.0121 | 0.0353 | 0.3881 | 0.079  | -0.036 | -0.87  | -1.264 | -0.523 |
| PCHAS_010110 | 1.0421 | 0.1105 | 0.1751 | -0.081 | 0.0905 | 0.1878 | 0.4938 | 0.2303 | 0.1165 | 0.2545 | 1.8377 | 0.388  |
| PCHAS_112230 | -0.287 | -0.898 | -0.265 | -0.846 | -0.153 | -0.175 | 1.5921 | 0.9646 | -0.055 | 0.8883 | 1.0106 | 0.4358 |
| PCHAS_132820 | 0.5507 | 0.4174 | 0.3681 | -0.158 | 0.0373 | -0.421 | -0.477 | -0.583 | -0.516 | -0.683 | 0.1948 | -0.609 |
| PCHAS_141910 | -0.628 | -0.472 | -0.54  | -0.221 | -0.169 | 0.0041 | -0.019 | 0.1335 | 0.0078 | -0.195 | -0.075 | -0.196 |
| PCHAS_080280 | -0.292 | -0.254 | -0.341 | -0.117 | -0.087 | -0.055 | -0.581 | -0.154 | 0.1386 | 1.4936 | 1.2508 | 1.5583 |
| PCHAS_143780 | -1.025 | -0.494 | -0.368 | -0.034 | 0.0606 | 0.1116 | 0.1239 | 0.4635 | 0.0747 | 0.0571 | 0.2968 | -0.045 |
| PCHAS_110075 | 0.4557 | 0.2233 | -0.773 | -0.106 | 0.2692 | -0.297 | 0.2161 | -0.072 | -0.263 | -0.253 | 0.4881 | 0.0464 |
| PCHAS_140040 | 2.2194 | 0.9046 | -0.056 | -1.162 | -0.773 | -0.737 | -2.214 | -1.478 | -0.825 | -0.206 | 0.3727 | -0.359 |
| PCHAS_120630 | 0.158  | -0.158 | -0.047 | -0.415 | -0.131 | 0.0039 | 0.2475 | 0.2844 | -0.183 | -0.039 | 0.0817 | -0.066 |
| PCHAS_110240 | -0.518 | 0.0115 | 0.4828 | 0.0948 | 0.2409 | -0.12  | 0.653  | 0.2747 | -0.328 | -0.182 | -0.016 | -0.577 |
| PCHAS_031330 | 0.6893 | 0.2766 | 0.4454 | 0.1694 | 0.2028 | -0.319 | 0.0922 | -0.309 | -0.34  | -1.396 | -0.752 | -0.419 |
| PCHAS_122780 | 0.5895 | 0.2987 | 0.4271 | 0.5061 | 0.1053 | -0.013 | -0.179 | -0.251 | -5E-04 | -0.676 | -1.384 | -0.65  |
| PCHAS_113460 | 0.1675 | 0.2185 | 0.2756 | 0.1724 | 0.0305 | -0.179 | -0.019 | 0.1629 | -0.123 | -0.371 | 0.0814 | -0.295 |
| PCHAS_091600 | -0.179 | -0.12  | -0.355 | -0.108 | -0.084 | -0.035 | -0.424 | -0.227 | -0.096 | 0.0701 | 0.5727 | -0.196 |
| PCHAS_021140 | -0.434 | 0.2792 | -0.007 | 0.0805 | 0.1099 | 0.23   | 0.1047 | -0.063 | -0.006 | -0.846 | -0.509 | -0.423 |
| PCHAS_135630 | -0.657 | -1.266 | -1.277 | -1.159 | -0.413 | 0.5386 | 0.0989 | 0.8101 | 0.2675 | 1.9527 | 1.617  | 1.459  |



|              |        |        |        |        |        |        |        |        |        |        |        |        |
|--------------|--------|--------|--------|--------|--------|--------|--------|--------|--------|--------|--------|--------|
| PCHAS_040920 | -0.058 | 0.4682 | -0.104 | -0.098 | -0.192 | -0.55  | -0.728 | -0.367 | -0.311 | -0.475 | -0.712 | -0.799 |
| PCHAS_134690 | 0.7975 | 0.1833 | -0.694 | 0.0807 | -0.519 | 0.1041 | -0.333 | -0.016 | 0.1095 | -0.004 | 0.4772 | 0.1186 |
| PCHAS_010980 | 0.5462 | 0.2017 | 0.3057 | 0.3442 | 0.253  | -0.178 | -0.263 | -0.575 | -0.266 | -0.872 | -1.543 | -0.809 |
| PCHAS_050730 | -0.303 | 0.6307 | 0.9208 | -0.236 | 0.1021 | -0.506 | -0.831 | -0.167 | -0.326 | -0.109 | -0.79  | -0.429 |
| PCHAS_132250 | -0.137 | -0.103 | -0.323 | 0.0036 | -0.055 | -0.019 | 0.4225 | 0.0368 | -0.096 | -0.098 | -0.354 | -0.255 |
| PCHAS_145940 | -0.5   | 0.5581 | 0.6104 | 0.2722 | 0.1409 | 0.1962 | 0.0037 | 0.161  | 0.2358 | 0.2148 | 0.1788 | -0.013 |
| PCHAS_110310 | -0.049 | 0.4079 | 0.7374 | 0.0706 | 0.2898 | 0.0178 | 0.1945 | 0.0727 | -0.018 | -0.11  | 0.125  | -0.446 |
| PCHAS_060400 | -0.783 | -0.732 | -1.085 | 0.7036 | -0.387 | 0.7622 | -0.129 | 0.1642 | 0.7098 | -0.935 | -1.361 | -0.077 |
| PCHAS_041370 | -0.094 | -0.038 | 0.0312 | -0.259 | -0.015 | -0.081 | 0.559  | 0.1376 | 0.0142 | -0.443 | -0.157 | -0.699 |
| PCHAS_132260 | 0.6198 | -0.629 | -0.642 | -0.401 | 0.0274 | 0.2631 | 0.8043 | -0.078 | 0.2752 | 0.8353 | 0.6266 | 0.879  |
| PCHAS_040640 | 0.2402 | 0.2797 | 0.225  | 0.2807 | 0.1153 | -0.112 | -0.052 | 0.0837 | 0.0018 | -0.36  | -0.348 | -0.131 |
| PCHAS_110100 | -0.944 | -0.384 | 0.2018 | 1.5836 | 0.8996 | 0.3318 | -0.516 | -0.254 | 0.8588 | -1.492 | -2.322 | -1.476 |
| PCHAS_132770 | 0.3582 | 0.1865 | 0.4317 | 0.1477 | 0.214  | -0.249 | 0.0526 | 0.1865 | -0.248 | -0.413 | -0.02  | -0.486 |
| PCHAS_080200 | 0.1918 | 0.4711 | 0.5304 | 0.2344 | 0.0133 | -0.366 | 0.166  | -0.275 | -0.226 | -1.074 | -1.266 | -0.823 |
| PCHAS_062420 | 0.1181 | -0.532 | -0.298 | -0.273 | 0.0022 | 0.1792 | -0.483 | 0.222  | -0.009 | 0.3618 | 0.2417 | 0.4277 |
| PCHAS_122480 | 0.2716 | 0.1998 | 0.05   | -0.022 | -0.249 | 0.1409 | -0.744 | -0.237 | -0.12  | -0.189 | -0.045 | -0.139 |
| PCHAS_134200 | -1.026 | -0.363 | -0.017 | -0.16  | 0.1945 | 0.231  | 0.6175 | 0.419  | 0.1851 | -0.065 | -0.048 | -0.149 |
| PCHAS_010630 | -0.13  | -0.453 | 0.1606 | 0.0437 | 0.0469 | 0.1134 | 0.4004 | 0.2382 | 0.2087 | 0.1476 | 0.3529 | 0.1654 |
| PCHAS_040910 | -0.051 | -0.404 | -0.058 | 0.0969 | -0.01  | -0.019 | 0.0994 | -0.307 | 0.023  | -0.846 | -1.143 | -0.549 |
| PCHAS_020080 | -0.181 | -1.091 | -0.995 | -0.531 | 0.0537 | 0.4651 | 1.2547 | 0.6619 | 0.3557 | 0.8641 | 0.3581 | 0.5994 |
| PCHAS_100650 | 0.2733 | 0.2481 | 0.1323 | -0.19  | -0.248 | -0.142 | -0.059 | 0.1064 | -0.288 | 0.3952 | 1.3401 | 0.5123 |
| PCHAS_142880 | -0.303 | -0.34  | 0.1582 | 0.3496 | 0.3748 | 0.2079 | 0.2895 | 0.0745 | 0.0297 | -0.638 | -0.259 | -0.56  |
| PCHAS_110180 | -0.463 | 0.2782 | 0.1479 | -0.6   | -0.127 | -0.119 | -0.25  | 0.0595 | -0.418 | -0.352 | -0.117 | -0.107 |
| PCHAS_120860 | 0.3616 | -0.465 | -0.89  | -0.576 | -0.408 | -0.224 | -0.64  | -0.156 | -0.164 | 1.6012 | 2.5266 | 1.0996 |
| PCHAS_020910 | -0.248 | -0.943 | 0.044  | 0.0311 | 0.0433 | 0.925  | 0.4954 | 0.4851 | 0.5458 | 0.3366 | -0.129 | 0.0054 |
| PCHAS_051220 | 0.0729 | 0.5624 | 0.4907 | -0.176 | 0.0383 | -0.069 | -1.293 | -0.563 | -0.572 | -0.842 | -0.096 | -0.821 |
| PCHAS_133000 | -0.767 | -0.212 | 0.1739 | 0.4771 | 0.2449 | 0.5257 | 0.4881 | 0.3817 | 0.4415 | -0.104 | -0.92  | -0.196 |
| PCHAS_010520 | -0.43  | -0.062 | 0.0472 | 0.4437 | 0.3376 | 0.4161 | 0.0948 | 0.3134 | 0.4577 | -0.657 | -1.017 | -0.237 |
| PCHAS_136600 | 0.0108 | 0.0054 | -0.448 | -0.573 | -0.364 | 0.1975 | 0.4016 | 0.5803 | 0.0267 | 0.4717 | 0.5014 | 0.1191 |
| PCHAS_041490 | -0.301 | 0.1498 | -0.337 | 0.3004 | -0.207 | 0.0756 | 0.0748 | 0.38   | 0.2858 | 0.113  | 0.0964 | 0.1431 |
| PCHAS_112740 | 0.1529 | -0.207 | -0.87  | 0.8487 | -0.455 | 0.6131 | 0.1536 | -0.145 | 0.1014 | -1.225 | -1.289 | 0.1978 |
| PCHAS_092410 | 0.3187 | 0.2517 | 1.2908 | 0.3914 | 0.3115 | -0.328 | 0.473  | 0.2108 | -0.06  | -0.428 | -1.199 | -0.187 |
| PCHAS_000840 | -0.213 | 0.1907 | 0.2987 | 0.1379 | -0.268 | 0.2028 | -0.742 | 0.0677 | 0.2818 | 0.4786 | -0.715 | 0.0536 |
| PCHAS_041120 | 0.0169 | -0.227 | 0.1789 | 0.2098 | 0.4058 | 0.2357 | 0.2699 | 0.4604 | -0.017 | -0.053 | -0.097 | -0.178 |
| PCHAS_130140 | 0.5836 | 0.3732 | -0.139 | -0.063 | -0.379 | 1.1548 | -0.191 | -0.392 | -0.336 | -0.577 | 0.4873 | -0.356 |
| PCHAS_134500 | 1.1937 | 0.7529 | 1.118  | -0.225 | -0.128 | -1.123 | -0.989 | -0.652 | -0.7   | -0.924 | 1.0586 | -0.699 |
| PCHAS_123730 | 0.8614 | 0.0976 | 0.3103 | 0.0169 | 0.0914 | 0.425  | -0.417 | -0.512 | 0.221  | 0.4814 | 1.7674 | 0.7144 |
| PCHAS_100560 | -0.897 | -0.211 | -0.051 | 0.1183 | 0.1703 | 0.7261 | 1.2072 | 0.4901 | 0.2824 | 0.336  | 0.4751 | 0.2339 |
| PCHAS_113550 | -0.608 | -0.396 | -0.349 | -0.707 | -0.443 | -0.108 | -0.781 | -0.364 | 0.1163 | 2.0126 | 2.507  | 1.5503 |
| PCHAS_090800 | 0.1798 | -0.144 | 0.1188 | -0.266 | 0.0055 | -0.284 | 0.2632 | 0.6836 | -0.274 | 0.3496 | 0.3517 | 0.1732 |
| PCHAS_141340 | -0.057 | 0.0957 | 0.3492 | 0.1294 | 0.2113 | -0.2   | -0.154 | 0.0341 | -0.206 | 0.1187 | -0.49  | 0.0597 |
| PCHAS_133560 | -0.518 | -0.171 | 0.3238 | 0.1125 | 0.0136 | -0.005 | 0.3228 | 0.1135 | 0.0621 | -0.821 | 0.0344 | -1.041 |
| PCHAS_040490 | 1.0295 | 0.6201 | 0.1294 | 0.6352 | -0.066 | 0.2889 | -0.454 | -0.041 | 0.2582 | -0.756 | -0.708 | 0.3696 |
| PCHAS_041880 | 0.3045 | 0.3267 | 0.1614 | 0.1546 | -0.006 | -0.129 | 0.0941 | 0.1185 | -0.137 | -0.051 | -0.06  | -0.011 |
| PCHAS_132180 | -0.779 | -0.965 | 0.4312 | 0.1125 | 0.0892 | -0.017 | -0.179 | 0.0353 | 0.2981 | 0.4073 | 0.6361 | 0.3133 |
| PCHAS_101420 | -0.099 | -0.087 | -0.101 | 0.0477 | 0.0684 | 0.5028 | -0.249 | -0.086 | 0.2261 | 1.1665 | 0.5986 | 0.8426 |
| PCHAS_101970 | -0.402 | -0.322 | 0.3794 | -0.524 | -0.169 | -0.098 | 0.2069 | 0.303  | -0.16  | 0.6853 | 0.4329 | 0.4154 |
| PCHAS_132650 | -0.055 | -0.032 | 0.4735 | 0.3866 | 0.4863 | -0.039 | -0.056 | -0.266 | -0.071 | -0.689 | -0.843 | -0.727 |
| PCHAS_145080 | 0.5238 | 0.2288 | 0.221  | 0.3333 | 0.082  | 0.1754 | 0.0855 | 0.1376 | 0.2344 | 0.4661 | -0.343 | 0.3712 |
| PCHAS_145260 | -1.439 | -1.084 | -0.899 | -0.273 | 0.0171 | -0.254 | -0.067 | 0.6321 | 0.3358 | 0.1982 | -0.008 | 0.1042 |

|              |        |        |        |        |        |        |        |        |        |        |        |        |
|--------------|--------|--------|--------|--------|--------|--------|--------|--------|--------|--------|--------|--------|
| PCHAS_140680 | -0.466 | -0.075 | -0.273 | 0.2311 | 0.1659 | 0.2326 | 0.0989 | 0.0821 | 0.0231 | -0.43  | -0.504 | -0.304 |
| PCHAS_062180 | 0.6743 | 0.2649 | 0.2825 | 0.2806 | 0.0088 | -0.286 | -0.595 | -0.734 | -0.471 | -1.117 | -0.647 | -0.752 |
| PCHAS_131750 | -0.328 | -0.01  | 0.0274 | 0.337  | 0.0881 | 0.124  | 0.1597 | -0.508 | 0.1168 | -0.479 | -0.582 | -0.598 |
| PCHAS_111740 | -0.288 | 0.1461 | -0.103 | 0.268  | -0.098 | 0.2262 | 0.579  | 0.3043 | 0.2126 | -0.159 | 0.2137 | -0.192 |
| PCHAS_081840 | -0.145 | -0.132 | 0.1862 | 0.6982 | 0.3367 | 0.4875 | 0.4477 | 0.488  | 0.32   | -0.377 | -1.267 | -0.036 |
| PCHAS_101790 | -0.467 | -0.348 | -0.749 | -0.391 | -0.114 | 0.3716 | 0.9068 | 0.9587 | 0.4235 | 0.9931 | 0.2287 | 0.6016 |
| PCHAS_083140 | 0.4424 | 0.7476 | 0.2301 | 0.2152 | -0.084 | -0.15  | -0.767 | -0.516 | -0.322 | -0.885 | -0.963 | -0.83  |
| PCHAS_020620 | -0.806 | -0.1   | 0.3692 | 0.5392 | 0.2804 | 0.1607 | 0.7025 | 0.0374 | 0.2209 | -0.743 | -0.427 | -0.477 |
| PCHAS_102120 | 1.045  | 0.0003 | 0.2119 | -0.094 | 0.1342 | -0.007 | -0.082 | 0.1954 | 0.0646 | 0.0749 | -0.273 | 0.129  |
| PCHAS_010160 | 0.7965 | 0.4406 | 0.1845 | 0.296  | -0.087 | -0.314 | -0.809 | -0.674 | -0.342 | -1.068 | -0.419 | -0.899 |
| PCHAS_071400 | -0.347 | -0.125 | -0.156 | -0.099 | 0.1481 | -0.181 | 0.537  | 0.0717 | -0.012 | -0.028 | -0.258 | 0.043  |
| PCHAS_134380 | 0.2789 | -0.359 | 0.3489 | 0.5079 | 0.1032 | 0.6899 | 0.0035 | 0.3482 | 0.5066 | 0.2678 | -1.36  | 0.7085 |
| PCHAS_081790 | 0.5946 | 0.3472 | 0.7599 | -0.074 | -0.454 | -0.266 | 0.2307 | -0.181 | -0.452 | -0.684 | -0.046 | -0.319 |
| PCHAS_071870 | 0.1086 | 0.0013 | 0.0142 | -0.046 | -0.038 | 0.0083 | -0.023 | -0.329 | -0.086 | -0.11  | -0.209 | 0.0064 |
| PCHAS_083300 | -0.132 | -0.295 | 0.408  | 0.1428 | 0.0678 | -0.09  | -0.775 | 0.0312 | -0.68  | 0.1918 | 1.2353 | 0.3923 |
| PCHAS_111110 | 0.5292 | 0.4123 | 0.4861 | 0.1181 | -0.171 | -0.241 | -0.232 | 0.0143 | 0.0438 | -0.324 | -0.001 | -0.358 |
| PCHAS_113490 | 0.145  | 0.2578 | 0.4586 | 0.2812 | 0.2908 | -0.74  | -0.186 | -0.574 | -0.462 | -2.253 | -0.819 | -0.728 |
| PCHAS_104020 | 0.08   | 0.0633 | -0.097 | 0.5144 | -0.044 | -0.198 | -0.164 | -0.201 | -0.237 | -0.275 | -0.029 | -0.086 |
| PCHAS_040860 | 0.0443 | 0.1805 | -0.051 | 0.0284 | -0.018 | -0.144 | 0.1824 | 0.1801 | -0.008 | -0.129 | -0.021 | -0.098 |
| PCHAS_073100 | 0.8865 | 0.4558 | 0.1364 | 0.225  | -0.019 | 0.3376 | -0.424 | -0.129 | 0.1193 | 1.3419 | 0.3903 | 0.884  |
| PCHAS_122500 | -0.476 | -1.1   | -0.895 | -0.749 | -0.162 | 0.449  | 0.5427 | 0.6679 | 0.4203 | 1.1299 | 0.6126 | 0.8679 |
| PCHAS_060560 | 0.0583 | 0.1807 | 0.1619 | 0.1411 | -0.009 | -0.173 | 0.5496 | -0.086 | -0.256 | -0.828 | -0.555 | -0.377 |
| PCHAS_103140 | -0.15  | 0.034  | 0.2542 | -0.146 | 0.0475 | -0.068 | -0.036 | 0.0852 | -0.115 | -0.097 | 0.0719 | -0.074 |
| PCHAS_102110 | 0.1711 | -0.003 | -0.095 | 0.101  | -0.081 | 0.8918 | 0.4859 | -0.199 | 0.9924 | 0.1217 | 1.4479 | 0.497  |
| PCHAS_100770 | 0.8059 | 0.394  | 0.4821 | -0.131 | -0.209 | -0.369 | -0.444 | -0.581 | -0.462 | -0.649 | 0.2792 | -0.243 |
| PCHAS_051430 | 0.5266 | -0.443 | -0.703 | -1.088 | -0.365 | -0.798 | 0.6525 | 0.0489 | -0.364 | 1.4453 | 2.9668 | 0.6351 |
| PCHAS_060460 | -0.237 | -0.222 | 0.2719 | -0.437 | -0.045 | -0.412 | 0.1457 | 0.153  | -0.318 | -0.221 | 0.0721 | -0.162 |
| PCHAS_052290 | -1.68  | -1.769 | -1.852 | -1.642 | -0.13  | 0.2899 | 0.8948 | 0.7738 | 0.1931 | 0.4418 | 0.1198 | -0.319 |
| PCHAS_143180 | 0.5839 | 0.6212 | 0.3629 | -0.026 | -0.046 | -0.475 | -0.111 | -0.464 | -0.299 | -0.682 | 0.209  | -0.116 |
| PCHAS_144990 | -0.091 | 0.5111 | 0.6999 | 0.4881 | 0.158  | -0.168 | -0.02  | -0.635 | -0.132 | -2.011 | -0.709 | -0.965 |
| PCHAS_122840 | 0.321  | 0.0673 | -0.038 | 0.3699 | -0.057 | -0.269 | -0.656 | -0.679 | -0.477 | -0.084 | 0.089  | 0.2131 |
| PCHAS_082810 | 0.4835 | 0.1158 | -0.146 | -0.245 | 0.0544 | -0.393 | 0.3507 | 0.3503 | -0.204 | 0.104  | -0.205 | -0.286 |
| PCHAS_082320 | 0.2382 | 0.5273 | 0.4594 | 0.3279 | 0.1373 | -0.378 | -0.083 | 0.1584 | -0.287 | -0.378 | -0.819 | 0.0324 |
| PCHAS_071470 | -1.046 | -0.524 | 0.078  | -0.197 | 0.1582 | 0.1116 | 0.6324 | 0.5999 | 0.1838 | 0.9975 | 0.8654 | 0.6734 |
| PCHAS_010890 | -0.175 | -1.282 | -1.243 | -1.255 | -0.492 | -0.258 | -0.436 | -0.154 | -0.113 | 1.9851 | 2.4498 | 1.3956 |
| PCHAS_140880 | -0.165 | 0.0356 | -0.03  | 0.0604 | 0.1454 | 0.3201 | 0.1665 | 0.192  | 0.2397 | 0.2434 | -1.691 | 0.1261 |
| PCHAS_062280 | 0.7782 | -0.226 | 0.1557 | -0.269 | 0.1141 | 0.0418 | -0.526 | 0.0478 | -0.17  | -0.257 | -0.2   | -0.102 |
| PCHAS_051930 | -0.99  | -2.024 | -2.681 | -2.968 | -0.219 | 0.7199 | -0.588 | -0.312 | 0.6965 | 1.503  | 0.983  | 1.4521 |
| PCHAS_130390 | 0.0739 | -0.081 | 0.4033 | 0.517  | 0.0825 | 0.5692 | 0.4684 | 0.1669 | 0.3393 | 0.4357 | 0.1651 | 0.4017 |
| PCHAS_110380 | -0.234 | -4E-04 | 0.3174 | 0.4234 | 0.3746 | 0.7343 | 0.0548 | 0.1017 | 0.4331 | 0.4553 | 0.0486 | -0.294 |
| PCHAS_072520 | -0.253 | 0.8417 | 0.6017 | 0.6853 | 0.1776 | 0.047  | -0.017 | 0.0802 | -0.055 | -0.563 | -0.902 | -0.298 |
| PCHAS_130920 | -1.745 | -1.824 | -1.345 | -0.748 | -0.047 | 0.4297 | 0.8203 | 1.1351 | 0.5407 | 0.8088 | 0.6042 | 0.4162 |
| PCHAS_092140 | -5E-04 | 0.5858 | 0.4593 | 0.4174 | 0.1635 | -0.036 | -0.017 | -0.331 | -0.143 | -0.985 | -0.715 | -0.525 |
| PCHAS_144050 | -0.446 | -0.118 | 0.1557 | 0.3314 | 0.3897 | 0.1458 | 0.2794 | -0.076 | -0.056 | -0.628 | -1.344 | -0.45  |
| PCHAS_145090 | 0.1092 | 0.2507 | 0.6392 | 0.4839 | 0.1222 | 0.1765 | 0.4274 | 0.8623 | 0.2433 | 0.4089 | 0.6431 | 0.2581 |
| PCHAS_145110 | 0.0045 | -0.753 | -0.275 | -0.026 | -0.046 | 0.0499 | -0.038 | -0.081 | 0.0633 | -0.013 | -0.181 | 0.2362 |
| PCHAS_020710 | -0.83  | 0.025  | 0.4771 | 0.1265 | 0.091  | -0.033 | 0.1381 | 0.1261 | -0.333 | -0.087 | -0.117 | -0.18  |
| PCHAS_120290 | 0.2155 | 0.237  | 0.043  | 0.3818 | 0.1577 | -0.146 | -0.1   | -0.441 | -0.129 | -1.034 | -1.109 | -0.934 |
| PCHAS_100800 | -0.822 | -0.727 | -0.235 | -0.21  | -0.122 | 0.2291 | 0.1221 | 0.5374 | 0.1903 | 0.7117 | 0.4465 | 0.3779 |
| PCHAS_030600 | 0.2563 | 0.3045 | 0.676  | 0.3212 | 0.156  | -0.317 | 0.3524 | 0.3923 | -0.197 | -0.491 | -0.845 | -0.358 |

|              |        |        |        |        |        |        |        |        |        |        |        |        |
|--------------|--------|--------|--------|--------|--------|--------|--------|--------|--------|--------|--------|--------|
| PCHAS_124240 | -0.492 | -0.66  | 0.1986 | 0.0652 | 0.1622 | 0.0247 | 0.7272 | 0.3412 | -0.001 | 0.0189 | -0.328 | -0.187 |
| PCHAS_131440 | -0.793 | -0.288 | -0.343 | -0.221 | -0.02  | 0.1254 | 0.6334 | 0.7952 | 0.2877 | -0.015 | 0.3552 | -0.015 |
| PCHAS_010560 | 0.3497 | -0.094 | -0.205 | -0.513 | -0.412 | -0.37  | 0.228  | 0.0014 | -0.291 | 0.6829 | 0.5597 | 0.4903 |
| PCHAS_135240 | 0.0612 | 0.0516 | 0.2121 | -0.002 | 0.1444 | -0.049 | 0.3773 | 0.0119 | 0.1093 | -0.907 | 0.0695 | -0.691 |
| PCHAS_021320 | 0.8118 | 0.6632 | 0.2831 | 0.3242 | -0.082 | 0.0407 | -0.043 | -0.272 | -0.316 | -0.915 | -0.562 | -0.559 |
| PCHAS_135900 | 0.2505 | 0.2493 | 0.3002 | 0.0059 | 0.0987 | -0.264 | -0.015 | -0.381 | -0.249 | -0.651 | -0.323 | -0.432 |
| PCHAS_140530 | 0.3549 | 0.163  | 0.3083 | -0.006 | 0.0673 | -0.209 | 0.4578 | 0.0831 | -0.187 | -0.91  | 0.1713 | -0.645 |
| PCHAS_145340 | -0.352 | -0.457 | 0.5796 | 0.2334 | 0.1639 | 0.0016 | -0.346 | 0.0969 | 0.1013 | -0.464 | 0.2322 | 0.0082 |
| PCHAS_140260 | -0.284 | -1.146 | 0.0292 | -1.829 | -0.019 | 0.3401 | 1.6822 | 0.1298 | 0.1031 | 1.0726 | 0.6999 | -0.255 |
| PCHAS_070790 | 0.1902 | -0.133 | -0.252 | -0.099 | 0.0407 | -0.004 | 0.0192 | -0.132 | -0.053 | 0.7315 | 0.5665 | 0.8017 |
| PCHAS_080120 | 0.0174 | 0.0994 | 0.2859 | 0.3086 | 0.1981 | 0.1073 | 0.2202 | 0.1533 | 0.004  | 0.1907 | -0.637 | 0.2555 |
| PCHAS_135020 | -0.45  | 0.0539 | 0.2035 | 0.2571 | 0.3551 | -0.016 | 0.6131 | -0.341 | -0.06  | -1.088 | -0.592 | -0.914 |
| PCHAS_130940 | -0.168 | 0.1906 | 0.0248 | 0.2172 | 0.0882 | 0.1283 | 0.0875 | -0.417 | 0.135  | -1.168 | -1.001 | -0.937 |
| PCHAS_121820 | 0.5691 | 0.5746 | 0.3813 | 0.7279 | 0.1446 | -0.298 | -1.043 | -1.205 | -0.294 | -2.365 | -1.723 | -1.388 |
| PCHAS_030420 | -0.529 | -0.562 | -0.048 | -0.256 | 0.0702 | 0.2769 | 0.5038 | 0.3642 | 0.1375 | 0.1931 | 0.605  | 0.48   |
| PCHAS_072100 | 0.2519 | 0.0105 | 0.0572 | -0.061 | -0.007 | -0.208 | 0.144  | -0.145 | -0.09  | -0.475 | -0.204 | -0.366 |
| PCHAS_143950 | 0.7207 | 1.0381 | 1.2021 | 0.3041 | -0.015 | 0.0167 | 0.0168 | -0.006 | -0.137 | -0.171 | 0.1168 | 0.0327 |
| PCHAS_134060 | -0.121 | -0.036 | -1.737 | 0.9633 | 0.007  | 0.5507 | -0.227 | 0.0744 | 0.9213 | 0.1743 | 0.3468 | 0.8632 |
| PCHAS_020800 | -0.319 | -0.026 | 0.541  | 0.5756 | 0.2056 | 0.2316 | 0.7554 | 0.5395 | 0.3439 | -0.085 | -0.488 | -0.194 |
| PCHAS_093420 | -0.067 | 0.2789 | -0.427 | 0.4875 | -0.019 | 0.0991 | -0.206 | -0.55  | 0.1416 | -0.391 | -0.668 | -0.186 |
| PCHAS_133250 | 0.4781 | 0.4147 | 0.4576 | 0.2401 | 0.117  | -0.304 | -0.819 | -0.624 | -0.339 | -0.548 | -0.822 | -0.645 |
| PCHAS_144120 | 0.3981 | 0.496  | 0.1865 | -0.168 | -0.08  | -0.708 | -1.088 | -1.181 | -0.577 | -1.866 | -1.695 | -1.906 |
| PCHAS_072250 | 0.3556 | 0.6482 | 0.4798 | 0.2559 | 0.0422 | 0.3084 | 0.1652 | -0.176 | -0.037 | -0.246 | 0.4996 | -0.194 |
| PCHAS_093000 | 0.0763 | 0.0605 | -0.106 | 0.1772 | -0.045 | -0.078 | -0.432 | -0.58  | -0.068 | 0.0116 | 0.2309 | -0.14  |
| PCHAS_135130 | 0.5601 | 0.2483 | -0.019 | 0.6572 | 0.198  | -0.117 | 0.2676 | 0.3081 | -0.313 | -0.144 | 0.3024 | -0.135 |
| PCHAS_090180 | -0.934 | -0.14  | 0.0165 | -0.049 | 0.0964 | 0.0723 | 0.1823 | 0.2893 | 0.1227 | -0.487 | -0.746 | -0.514 |
| PCHAS_030380 | 0.3593 | 0.1917 | -0.257 | 0.3744 | -0.631 | -0.083 | -0.137 | 0.3117 | 0.0332 | 0.4197 | 1.0439 | 0.3088 |
| PCHAS_071775 | -0.215 | 0.1267 | 0.6273 | 0.2652 | 0.0477 | 0.3357 | 0.5484 | 0.0703 | 0.4292 | 0.0183 | 0.3512 | -0.174 |
| PCHAS_081590 | -0.018 | -0.168 | 0.2208 | -0.372 | -0.078 | -0.225 | 0.1614 | 0.0373 | -0.155 | 0.2728 | 0.6572 | 0.1625 |
| PCHAS_091150 | 0.099  | -0.684 | -0.297 | -0.397 | -0.061 | -0.292 | -0.496 | -0.145 | 0.1074 | 1.055  | 0.8127 | 0.8793 |
| PCHAS_145630 | -1.089 | -0.023 | -0.17  | 0.3624 | 0.0565 | 0.3278 | -0.42  | 0.0585 | 0.3362 | -0.455 | -0.659 | -0.437 |
| PCHAS_145130 | 0.2233 | -0.067 | -0.176 | -0.037 | -0.094 | -0.011 | 0.101  | 0.4362 | 0.1891 | 0.7706 | -0.212 | 0.6453 |
| PCHAS_081640 | -0.851 | -0.405 | 0.0577 | -0.596 | -0.192 | 0.1147 | -0.306 | 0.4019 | 0.1599 | 0.2002 | 0.3725 | 0.1773 |
| PCHAS_061770 | -0.672 | -0.008 | 0.1861 | -0.05  | 0.2085 | 1.1546 | 0.7052 | 0.461  | 0.0095 | -0.305 | 0.2222 | -0.346 |
| PCHAS_082980 | 0.4424 | 0.6843 | -0.469 | -0.341 | -0.588 | -0.535 | -0.392 | -0.403 | -1.063 | 0.2877 | -0.494 | -0.025 |
| PCHAS_040170 | 1.3275 | 0.1621 | -0.015 | 0.1039 | -0.488 | 0.373  | 0.0108 | 0.0326 | 0.3061 | 0.3916 | 0.9501 | 0.6873 |
| PCHAS_111410 | -0.146 | 0.2286 | 0.1415 | -0.039 | -0.064 | 0.1593 | -0.459 | 0.1572 | -0.013 | 0.1916 | -0.197 | -0.048 |
| PCHAS_136790 | 0.0631 | -0.388 | -0.848 | 0.1108 | -0.385 | 0.2169 | 0.0414 | -0.271 | 0.1762 | 1.2003 | 1.2544 | 0.9791 |
| PCHAS_136610 | -0.352 | 0.4798 | 0.763  | 0.2366 | 0.0618 | -0.003 | -0.556 | -0.253 | -0.079 | -0.361 | -1.501 | -0.084 |
| PCHAS_052370 | -0.282 | -0.174 | -0.086 | -0.057 | 0.1721 | 0.0124 | 0.8028 | 0.4372 | 0.1632 | -0.216 | 0.0986 | -0.222 |
| PCHAS_136460 | 0.0506 | 0.0258 | 0.3225 | 0.0491 | 0.1715 | -0.223 | 0.7147 | 0.0269 | -0.096 | -0.339 | 0.0798 | -0.101 |
| PCHAS_100150 | 0.4331 | 0.3769 | 0.8735 | 0.5386 | 0.2748 | 0.2586 | 0.3069 | -0.159 | 0.2699 | -0.954 | -0.746 | -0.458 |
| PCHAS_082040 | -0.322 | -0.543 | -0.797 | -0.48  | -0.711 | -0.433 | -1.41  | -0.648 | -0.612 | 0.4648 | 3.3019 | 0.8659 |
| PCHAS_114540 | -1.107 | -1.192 | -0.862 | -0.294 | 0.1049 | 0.4672 | 1.112  | -0.034 | 0.2081 | -0.408 | -0.577 | -0.666 |
| PCHAS_030920 | 0.0543 | 0.381  | 0.0396 | -0.316 | 0.0972 | 0.0595 | -1.154 | 0.1388 | -0.181 | -0.03  | 0.0885 | -0.078 |
| PCHAS_102060 | -0.343 | 0.1381 | 0.0088 | 0.1653 | -0.014 | 0.149  | 0.2521 | -0.002 | 0.4059 | 0.5892 | 0.683  | 0.2958 |
| PCHAS_060170 | 1.562  | 0.9463 | 0.5055 | 0.4578 | -0.243 | -0.416 | -0.238 | -0.363 | -0.297 | -0.041 | 0.9532 | -0.464 |
| PCHAS_100780 | 0.6126 | 0.6741 | 0.3717 | 0.1871 | 0.0385 | -0.432 | -0.384 | -1.09  | -0.462 | -1.057 | -0.667 | -0.699 |
| PCHAS_122150 | 0.6926 | -0.338 | -0.019 | -0.267 | -0.01  | 1.2389 | -0.188 | 0.3846 | 1.153  | 1.1704 | 0.694  | 1.1033 |
| PCHAS_080940 | -0.258 | 0.0786 | 0.1194 | -0.232 | -0.043 | 0.0192 | 0.4232 | 0.6305 | 0.0475 | 0.4194 | 0.6107 | 0.2759 |

|              |        |        |        |        |        |        |        |        |        |        |        |        |
|--------------|--------|--------|--------|--------|--------|--------|--------|--------|--------|--------|--------|--------|
| PCHAS_080320 | 0.0384 | 0.3117 | 0.6656 | 0.5178 | 0.0633 | -0.215 | 0.2883 | -0.189 | -0.297 | -0.225 | 0.1265 | -0.735 |
| PCHAS_051010 | -0.816 | -0.501 | -0.571 | -0.445 | -0.102 | -0.045 | 0.8937 | 0.725  | 0.0742 | 1.051  | 0.9769 | 0.9333 |
| PCHAS_120280 | 0.3532 | 0.2708 | -0.259 | 0.4631 | -0.368 | -0.345 | 0.0455 | 0.0486 | -0.407 | -0.109 | -0.266 | 0.5826 |
| PCHAS_082720 | 0.363  | 0.4744 | 0.6053 | 0.2645 | -0.08  | -0.209 | -1.23  | -0.996 | -0.258 | -1.056 | -1.607 | -1.26  |
| PCHAS_114570 | 1.796  | 0.1945 | -0.244 | 0.1218 | -0.217 | -0.196 | 0.904  | 0.0827 | -0.257 | 0.1786 | 1.4525 | 0.3446 |
| PCHAS_051580 | -0.179 | -1.032 | -2.015 | -0.999 | -0.882 | -0.155 | -1.067 | -0.575 | -0.167 | 1.9656 | 1.0117 | 0.9582 |
| PCHAS_081450 | -0.513 | 0.1947 | 0.2069 | 0.2836 | 0.2186 | 0.1378 | 0.4325 | 0.1645 | 0.1797 | -0.672 | -0.661 | -0.976 |
| PCHAS_103260 | 0.3389 | 0.0312 | -0.228 | -0.456 | -0.314 | -0.325 | 0.1211 | 0.0573 | -0.359 | 0.3893 | 0.398  | 0.4369 |
| PCHAS_121730 | 0.3208 | 0.4514 | 0.2176 | 0.0654 | 0.1013 | -0.213 | 0.2128 | 0.0016 | -0.097 | -0.482 | -0.272 | -0.324 |
| PCHAS_111100 | 0.2825 | 0.4236 | 0.2816 | -0.116 | -0.019 | 0.0415 | -0.405 | -0.271 | -0.092 | -0.428 | -0.405 | -0.324 |
| PCHAS_141500 | 0.3905 | -0.055 | -1.128 | 0.7046 | 0.2422 | 0.6716 | -0.148 | -0.053 | 0.7372 | 0.2371 | -0.293 | 0.9693 |
| PCHAS_141720 | 0.3108 | 0.0063 | -0.07  | -0.178 | 0.0392 | -0.275 | 0.2027 | -0.219 | -0.29  | -0.664 | -0.328 | 0.0466 |
| PCHAS_132490 | 0.0318 | 0.1776 | -0.029 | 0.4054 | -0.125 | 0.0605 | -0.255 | 0.1671 | 0.2018 | 0.0088 | -1.474 | 0.4175 |
| PCHAS_051590 | 0.0342 | 0.2536 | 0.6875 | 0.3309 | 0.243  | 0.049  | 0.4955 | -0.031 | 0.1407 | -0.534 | -0.151 | -0.183 |
| PCHAS_080110 | 0.1944 | -0.043 | 0.0751 | -0.032 | -0.113 | -0.184 | 0.0705 | 0.1959 | -0.139 | -0.063 | 0.11   | -0.013 |
| PCHAS_123600 | 0.7271 | -0.09  | -0.292 | -0.019 | -0.012 | 0.2544 | -0.3   | 0.182  | 0.0479 | 0.1752 | 1.2372 | 0.755  |
| PCHAS_040280 | -0.033 | -0.394 | -0.233 | -0.618 | 0.0115 | 0.0162 | 0.1398 | 0.1466 | -0.067 | -0.209 | 0.3748 | -0.25  |
| PCHAS_071550 | -0.142 | -0.429 | 0.1879 | -0.332 | -0.116 | -0.587 | -0.193 | 0.288  | -0.872 | 0.1334 | 0.1817 | -0.205 |
| PCHAS_051660 | -0.142 | -0.093 | 0.343  | 0.4681 | 0.1805 | 0.1361 | -0.668 | -0.169 | -0.029 | -0.627 | -0.939 | -0.536 |
| PCHAS_092160 | -0.167 | 0.111  | 0.441  | -0.003 | 0.3116 | 0.0378 | 0.6748 | 0.2065 | -0.121 | -0.405 | 0.046  | -0.392 |
| PCHAS_104170 | 0.1847 | 0.2962 | 0.5961 | 0.1472 | 0.1189 | -0.036 | 0.2004 | 0.073  | 0.0486 | -1.106 | -0.617 | -0.412 |
| PCHAS_041430 | -0.755 | -0.364 | -0.455 | -0.059 | 0.1068 | -0.023 | -0.431 | -0.309 | 0.3349 | -1.04  | -1.029 | -0.695 |
| PCHAS_123470 | -0.717 | 0.0062 | -0.154 | -0.324 | 0.0557 | -0.409 | 0.54   | 0.5412 | -0.135 | 0.0449 | 0.2385 | 0.0334 |
| PCHAS_031800 | -0.4   | -0.041 | 0.275  | 0.4099 | 0.2406 | 0.0126 | 0.0581 | 0.2745 | -0.394 | -0.771 | -0.347 | -0.349 |
| PCHAS_133950 | -0.91  | -0.057 | -0.202 | 0.0863 | -0.106 | -0.059 | 1.1039 | 0.0811 | -0.141 | -0.144 | 0.8272 | -0.098 |
| PCHAS_071760 | 0.1977 | 0.494  | 0.7707 | -0.144 | 0.0982 | -0.489 | 0.0475 | 0.1962 | -0.357 | -0.196 | 0.6563 | -0.207 |
| PCHAS_073000 | -0.91  | -0.587 | -0.431 | -0.547 | -0.084 | -1E-04 | 1.0178 | -0.535 | -0.058 | 1.1562 | 1.8579 | 1.0405 |
| PCHAS_140700 | -0.222 | -0.29  | 0.2105 | 0.1821 | 0.2955 | 0.2433 | -0.294 | 0.0226 | 0.0641 | -0.661 | -0.18  | -0.596 |
| PCHAS_090280 | -0.208 | -0.113 | 0.1978 | -0.47  | 0.1101 | -0.413 | -0.09  | -0.228 | -0.319 | -0.641 | -0.281 | -0.622 |
| PCHAS_090700 | 1.0483 | -0.011 | 0.8453 | 0.0517 | 0.094  | -0.304 | 0.7465 | -0.44  | -0.269 | -0.684 | 0.3544 | -0.599 |
| PCHAS_146670 | 0.5793 | 0.3541 | 0.1074 | 0.406  | 0.1614 | -0.166 | -1.244 | -0.889 | -0.447 | -1.487 | -0.498 | -1.069 |
| PCHAS_021220 | 0.607  | 0.5454 | -0.948 | 0.8877 | 0.3776 | 1.9619 | 1.0747 | 0.285  | 0.8493 | -0.026 | 0.5596 | 1.158  |
| PCHAS_070480 | 0.0284 | 0.304  | 0.3669 | 0.4951 | 0.0538 | 0.0746 | 0.4122 | -0.153 | 0.0826 | -0.399 | -0.476 | -0.273 |
| PCHAS_131090 | 0.1514 | 0.4687 | 0.2021 | 0.2845 | -0.453 | 0.0773 | -0.331 | -0.527 | -0.015 | -1.217 | -2.404 | -0.799 |
| PCHAS_070540 | -0.231 | -0.035 | -0.638 | -0.887 | -0.535 | 0.3904 | -0.113 | -0.528 | -0.281 | 0.4195 | 0.7757 | 0.4638 |
| PCHAS_146190 | 0.9657 | 0.5326 | 0.8963 | 0.0877 | 0.0134 | -0.891 | 0.4642 | -0.103 | -0.532 | -0.884 | -0.655 | -0.746 |
| PCHAS_101480 | -0.654 | 0.2305 | -0.055 | 0.1082 | 0.0465 | 0.0911 | 0.2887 | 0.2737 | 0.1635 | -0.119 | 0.1452 | -0.016 |
| PCHAS_093040 | -1.061 | -0.936 | -1.587 | -1.225 | -0.272 | 0.0899 | 0.4093 | 0.8868 | 0.1762 | 1.3473 | 1.1367 | 0.9645 |
| PCHAS_122710 | -1.526 | -0.792 | -0.048 | -0.185 | 0.2286 | 0.1454 | 0.5247 | 0.4699 | 0.3529 | -0.231 | -0.356 | -0.572 |
| PCHAS_101530 | -0.213 | -0.641 | -0.531 | -0.715 | -0.349 | 0.3002 | -0.53  | -0.029 | 0.2019 | 1.4725 | 0.4769 | 1.0132 |
| PCHAS_091610 | 0.1726 | 0.0635 | 0.2097 | 0.1343 | 0.1365 | 0.1893 | -0.239 | -0.005 | 0.0946 | -0.094 | -0.166 | -0.245 |
| PCHAS_103690 | 0.7527 | -0.229 | -0.893 | 0.4102 | -0.774 | 0.767  | 1.1724 | 0.7127 | 0.7518 | 1.0608 | 0.4192 | 0.1982 |
| PCHAS_110790 | 0.1892 | 0.0345 | 0.1021 | -0.331 | 0.0743 | -0.117 | 0.5703 | -0.081 | -0.005 | 0.5067 | 0.4661 | 0.5893 |
| PCHAS_131000 | 0.543  | 0.4389 | 0.359  | 0.2829 | 0.1706 | -0.129 | -0.329 | -0.529 | -0.139 | -0.606 | -1.487 | -0.623 |
| PCHAS_136070 | -0.407 | -1.419 | -0.853 | -1.394 | -0.735 | -0.198 | 0.112  | 0.0704 | -0.218 | 1.1399 | 0.6621 | 1.3378 |
| PCHAS_135420 | -0.208 | 0.6551 | 0.5606 | 0.5832 | 0.1587 | -0.02  | 0.2876 | -0.472 | -0.029 | -1.116 | -1.039 | -0.693 |
| PCHAS_113600 | -0.667 | -0.275 | 0.136  | 0.1729 | 0.0676 | 0.081  | -0.062 | 0.3242 | -0.119 | -0.14  | -0.422 | -0.036 |
| PCHAS_110280 | -1.268 | -2.046 | -1.665 | -0.985 | -0.061 | 0.2106 | 0.7966 | 0.5103 | -0.01  | 0.242  | 0.3991 | -0.298 |
| PCHAS_041030 | 0.3537 | -0.033 | 0.347  | 0.2949 | 0.0574 | 0.6801 | 0.6678 | 0.2818 | 0.6497 | 0.0172 | 0.5695 | 0.4381 |
| PCHAS_124130 | -0.098 | 1.0495 | 0.5841 | 0.4172 | 0.1397 | 0.3387 | 0.6182 | -0.208 | -0.006 | -0.673 | -0.911 | -0.45  |

|              |        |        |        |        |        |        |        |        |        |        |        |        |
|--------------|--------|--------|--------|--------|--------|--------|--------|--------|--------|--------|--------|--------|
| PCHAS_051320 | 0.0528 | 0.7558 | 0.3172 | 0.2435 | 0.0164 | -0.26  | -0.958 | -0.707 | -0.422 | -0.458 | -0.627 | -0.56  |
| PCHAS_133550 | 0.7251 | 0.4175 | 0.7745 | 0.45   | 0.2103 | 0.363  | -0.011 | -0.222 | 0.2915 | -0.288 | -0.171 | -0.332 |
| PCHAS_071690 | 0.5848 | 0.1507 | 0.7303 | 0.3496 | 0.293  | 0.0764 | 0.453  | 0.1471 | 0.0909 | -1.015 | -0.867 | -0.494 |
| PCHAS_113050 | 0.5507 | 0.6974 | 0.5637 | 0.4886 | 0.0372 | -0.073 | -0.733 | -0.323 | -0.13  | -0.392 | -0.342 | -0.496 |
| PCHAS_081090 | -0.156 | 0.0796 | -0.164 | 0.2223 | 0.0894 | 0.2422 | -0.039 | 0.0229 | 0.0192 | -0.508 | -0.818 | -0.118 |
| PCHAS_100970 | -0.292 | -0.244 | -0.286 | 0.2522 | 0.0715 | 0.0455 | 0.0532 | -0.155 | 0.1029 | -0.686 | -0.714 | -0.637 |
| PCHAS_144480 | 0.9655 | 0.7024 | 0.4077 | 0.5461 | 0.2692 | 0.7508 | 0.6803 | -0.03  | 0.3026 | -0.466 | 0.1188 | -0.276 |
| PCHAS_083550 | -0.377 | 0.1407 | 0.2256 | 0.2848 | 0.1633 | -0.159 | -0.456 | -0.386 | -0.217 | -0.524 | -0.674 | -0.587 |
| PCHAS_010580 | -0.004 | 0.0725 | -0.307 | 0.3728 | -0.451 | 0.2298 | -0.026 | 0.3204 | 0.1069 | -0.47  | -0.296 | 0.3618 |
| PCHAS_130680 | -0.42  | 0.2176 | 0.5051 | 0.213  | 0.2236 | -0.115 | 0.2964 | -0.11  | 0.1843 | -0.921 | -0.823 | -0.676 |
| PCHAS_040250 | -0.044 | 0.2199 | 0.0971 | 0.2342 | 0.0938 | -0.189 | -0.282 | -0.614 | -0.145 | -1.443 | -1.12  | -1.146 |
| PCHAS_144180 | 0.3195 | -0.127 | -0.171 | 0.0535 | -0.092 | 0.3511 | 0.1172 | -0.129 | 0.1422 | -0.257 | 0.4546 | 0.0919 |
| PCHAS_134210 | -0.019 | -0.244 | -0.259 | -0.244 | -0.01  | 0.4968 | -0.309 | 0.3782 | 0.3187 | 0.8828 | 0.2489 | 0.7631 |
| PCHAS_130210 | -0.245 | -0.945 | -0.301 | -0.233 | 0.1504 | -0.158 | 0.19   | 0.799  | 0.2281 | 1.1171 | 0.6072 | 0.8609 |
| PCHAS_011270 | 0.1404 | -0.198 | -0.234 | -0.404 | -0.038 | 0.2601 | -0.301 | 0.0499 | 0.3729 | 0.7685 | 0.4247 | 0.5344 |
| PCHAS_090350 | -0.362 | -0.79  | 0.2846 | 0.0552 | 0.2344 | 0.2151 | -0.218 | 0.8714 | 0.1354 | 0.2923 | 0.2151 | 0.5545 |
| PCHAS_131080 | -0.028 | -0.146 | -0.123 | 0.1469 | 0.3644 | 0.1129 | 0.5733 | 0.0954 | 0.0597 | -0.251 | -0.158 | -0.344 |
| PCHAS_083350 | -0.291 | 0.3803 | 0.3641 | 0.1071 | 0.2062 | 0.12   | 0.4303 | -0.11  | 0.0108 | -0.107 | -0.214 | -0.056 |
| PCHAS_040230 | 0.3985 | 0.0767 | 0.0522 | 0.0106 | -0.103 | 0.2308 | 0.2961 | -0.177 | -0.048 | -0.143 | 0.0547 | 0.2495 |
| PCHAS_141300 | -1.77  | -1.514 | -1.656 | -0.591 | -0.146 | 0.4821 | 0.494  | 0.9146 | 0.5312 | 0.3649 | 0.0121 | 0.2431 |
| PCHAS_041560 | 0.5534 | 0.544  | 0.408  | -0.175 | -0.835 | -0.38  | -0.601 | -0.68  | -1.22  | -1.302 | -0.186 | 0.0209 |
| PCHAS_000930 | 1.4551 | 0.5273 | -0.039 | 0.6309 | -0.209 | -0.792 | -1.393 | -1.336 | -0.694 | -0.953 | -0.257 | -0.328 |
| PCHAS_122740 | -0.254 | -0.52  | -0.583 | -0.481 | -0.094 | 0.3945 | 0.9298 | 0.804  | 0.3732 | 1.1382 | 0.2564 | 0.607  |
| PCHAS_073020 | -0.977 | -0.445 | -0.174 | -0.219 | 0.0614 | 0.3974 | 0.673  | 1.1413 | 0.5675 | 0.4877 | 0.6692 | 0.1453 |
| PCHAS_101190 | 0.8773 | 0.5243 | 0.6639 | 0.2328 | 0.0744 | -0.188 | -1.391 | -0.922 | -0.218 | -0.837 | -0.82  | -0.526 |
| PCHAS_082820 | -0.253 | -0.085 | 0.3246 | -0.031 | 0.1066 | 0.3897 | 0.4821 | 0.2973 | 0.1677 | 0.0523 | 0.0521 | -0.119 |
| PCHAS_050760 | 0.1951 | 0.0875 | 0.1596 | 0.4421 | 0.0575 | -0.073 | 1.2359 | 0.6318 | -0.09  | 0.1586 | 0.622  | -0.219 |
| PCHAS_120230 | -0.399 | -0.184 | 0.1679 | -0.057 | 0.2778 | -0.077 | 0.8737 | 0.2908 | 0.1008 | -0.55  | 0.0546 | -0.654 |
| PCHAS_083370 | 0.0892 | -0.394 | 0.0075 | -0.257 | -0.022 | -0.17  | 1.1152 | 0.6343 | -0.289 | 0.2683 | 0.6992 | -0.125 |
| PCHAS_100520 | -0.517 | -0.989 | -0.194 | -0.135 | -0.039 | -0.341 | 0.5013 | 0.0549 | 0.0058 | 0.5104 | 0.0332 | 0.5371 |
| PCHAS_122360 | -0.262 | 0.0233 | -0.803 | 0.3797 | 0.2186 | 0.5451 | 0.3001 | 0.114  | 0.4629 | -0.103 | -0.148 | -0.119 |
| PCHAS_122210 | 0.295  | -0.021 | 0.4613 | 0.2111 | 0.0652 | 0.2613 | 0.1482 | 0.1356 | -0.189 | -0.123 | -0.366 | -0.166 |
| PCHAS_143150 | -0.426 | 0.1088 | 0.0856 | 0.1278 | -0.037 | 0.0894 | 0.2321 | -0.02  | 0.1995 | -0.936 | -0.865 | -0.969 |
| PCHAS_135930 | -0.679 | -0.134 | -0.046 | -0.559 | -0.043 | -0.011 | 0.3651 | 0.2901 | 0.0494 | 0.2617 | 0.6898 | 0.0892 |
| PCHAS_131710 | 0.0912 | -0.142 | -0.271 | -0.201 | -0.08  | 0.3979 | 0.0455 | 0.1676 | 0.2336 | 0.6744 | 0.3441 | 0.4934 |
| PCHAS_072240 | -0.229 | 0.0637 | 0.4271 | 0.0433 | 0.2605 | 0.1127 | 0.2024 | 0.2838 | 0.0934 | -0.364 | -0.163 | -0.42  |
| PCHAS_145740 | -0.821 | -1.812 | -1.182 | -1.612 | -0.276 | 0.3013 | 1.0815 | 0.9647 | 0.2245 | 0.8158 | 0.754  | 0.2926 |
| PCHAS_121870 | 0.772  | 0.0703 | 0.3416 | -0.054 | -0.216 | -0.407 | -0.273 | -0.249 | -0.433 | -0.141 | 0.4617 | 0.0743 |
| PCHAS_062020 | 0.3148 | -0.448 | 0.2425 | -0.005 | 0.0358 | -0.145 | -0.203 | 0.3584 | -0.323 | -0.218 | -0.504 | -0.382 |
| PCHAS_122190 | -0.058 | 0.1973 | 0.1335 | 0.5424 | 0.2904 | -0.195 | -0.211 | -0.073 | 0      | -0.104 | -0.188 | 0.0258 |
| PCHAS_031090 | -0.644 | 0.4924 | -0.04  | 0.2918 | 0.1506 | 0.845  | -0.009 | 0.592  | 0.3578 | 0.991  | 0.8518 | 0.3183 |
| PCHAS_021060 | 0.0062 | -0.642 | -0.114 | 0.0078 | 0.3526 | 0.023  | 0.0825 | 0.523  | 0.1229 | 0.3514 | -0.458 | 0.1103 |
| PCHAS_120850 | 0.2621 | -0.117 | 0.456  | -0.36  | 0.0408 | -0.138 | 1.119  | 0.113  | -0.037 | 0.2542 | 0.3817 | -0.09  |
| PCHAS_142720 | -0.31  | 0.267  | 0.5012 | 0.3876 | 0.1866 | -0.208 | 0.108  | -0.005 | -0.218 | -0.669 | -1.402 | -0.442 |
| PCHAS_140750 | -0.057 | 0.8156 | 0.5102 | 0.3559 | -0.085 | -0.28  | -0.411 | -0.491 | -0.239 | -0.823 | 0.2369 | -0.601 |
| PCHAS_082330 | 0.2396 | 0.4023 | 0.5674 | 0.4759 | 0.3925 | 0.0497 | -0.143 | -0.707 | -0.067 | -0.898 | -0.378 | -0.861 |
| PCHAS_091690 | 0.827  | 0.0049 | 0.3425 | -0.068 | -0.066 | -0.267 | 1.2428 | 0.2393 | 0.1461 | -0.085 | 0.8505 | 0.3394 |
| PCHAS_136170 | 0.527  | 0.5562 | 0.412  | 0.1027 | -0.002 | -0.421 | -0.813 | -0.975 | -0.601 | -0.345 | -0.225 | -0.074 |
| PCHAS_136990 | 0.3446 | 0.3287 | 0.0637 | 0.1498 | -0.091 | -0.126 | -0.09  | 0.0234 | -0.204 | -0.334 | -1.274 | -0.428 |
| PCHAS_121750 | 0.814  | -0.778 | -0.318 | -0.626 | 0.1149 | 0.54   | 0.0552 | 0.3674 | 0.4592 | 1.0951 | -0.705 | 1.0087 |

|              |        |        |        |        |        |        |        |        |        |        |        |        |
|--------------|--------|--------|--------|--------|--------|--------|--------|--------|--------|--------|--------|--------|
| PCHAS_082870 | -0.134 | -0.725 | -0.85  | -0.412 | -0.178 | 0.3281 | 0.2785 | 0.6044 | 0.2687 | 0.8989 | 0.7863 | 0.8682 |
| PCHAS_112540 | 0.051  | 0.4993 | 0.1869 | 0.224  | 0.165  | 0.0386 | -0.564 | -0.397 | -0.098 | -0.494 | -0.494 | -0.216 |
| PCHAS_141350 | 0.3573 | 0.0155 | 0.7773 | -0.241 | 0.0613 | -0.586 | 0.9939 | -0.023 | -0.229 | -0.88  | -0.08  | -1.067 |
| PCHAS_136290 | -0.025 | -0.523 | -0.521 | -0.429 | 0.2153 | 0.5939 | 0.1541 | 0.2484 | 0.4509 | 0.7823 | -0.358 | 0.3524 |
| PCHAS_090170 | -0.189 | -0.35  | 0.4005 | 0.3921 | 0.0862 | -0.011 | -0.224 | 0.3571 | 0.2247 | 0.3573 | 0.1086 | 0.3903 |
| PCHAS_040550 | -0.201 | 0.6463 | 0.8015 | 0.3305 | 0.2977 | -0.031 | -0.022 | -0.765 | -0.308 | -1.035 | -1.203 | -0.647 |
| PCHAS_011220 | -0.179 | -0.533 | -0.793 | -0.693 | -0.165 | 0.6048 | -0.652 | -0.76  | 0.2388 | 1.0135 | 1.6778 | 1.15   |
| PCHAS_144570 | 0.0661 | -0.044 | -0.412 | -0.268 | -0.155 | 0.1451 | -0.116 | 0.0139 | 0.1789 | 0.4878 | 0.4805 | 0.6931 |
| PCHAS_102860 | 0.3604 | 0.3132 | 0.9183 | 0.2446 | 0.1592 | -0.502 | -0.399 | -0.375 | -0.267 | -0.646 | -1.696 | -0.098 |
| PCHAS_092500 | 0.4487 | -1.377 | -0.297 | -1.069 | -0.309 | 0.0477 | 0.2117 | -0.639 | 0.0914 | 1.8627 | 1.4148 | 0.8701 |
| PCHAS_040790 | -0.3   | 0.1157 | 0.326  | 0.0451 | 0.1092 | 0.1067 | 0.1083 | 0.6523 | -0.045 | 0.3403 | 0.7573 | 0.1265 |
| PCHAS_100830 | -0.264 | -0.157 | -0.138 | 0.0467 | 0.1069 | 0.1137 | -0.363 | -0.017 | 0.1432 | -0.127 | -0.049 | 0.0038 |
| PCHAS_110220 | 0.0422 | 0.1257 | 0.336  | 0.5197 | 0.2994 | -0.114 | -0.193 | 0.1632 | 0.1137 | -1.059 | -0.325 | -0.245 |
| PCHAS_112700 | -0.073 | -0.045 | 0.1036 | 0.3104 | 0.0694 | -0.071 | -0.357 | -0.223 | -0.219 | -0.427 | -0.767 | -0.864 |
| PCHAS_124620 | -0.037 | 0.3011 | -0.416 | 0.73   | 0.1059 | 0.0893 | -0.587 | -0.011 | -0.203 | -0.222 | -0.277 | -0.158 |
| PCHAS_103900 | 0.141  | -0.221 | 0.2764 | -0.26  | 0.1085 | -0.505 | 0.1353 | 0.195  | -0.393 | -0.663 | -0.051 | -0.257 |
| PCHAS_040530 | -0.846 | -0.742 | -0.286 | -0.42  | 0.1029 | 0.1513 | 0.488  | 0.4554 | 0.1764 | 0.1825 | 0.5677 | 0.151  |
| PCHAS_121930 | 0.8777 | 0.4519 | 0.3861 | -0.004 | -0.01  | -0.385 | 0.345  | -0.441 | -0.343 | -0.915 | -0.094 | -0.739 |
| PCHAS_132890 | 0.0365 | 0.3148 | 0.1126 | 0.3246 | 0.0131 | 0.0922 | 0.1875 | -0.555 | 0.0816 | -1.982 | -1.25  | -1.157 |
| PCHAS_092750 | 0.3881 | 0.1293 | 0.6031 | 0.4989 | 0.3127 | 0.1345 | -0.101 | 0.3361 | 0.2208 | -0.258 | -0.063 | 0.5326 |
| PCHAS_141000 | 0.1102 | 0.2116 | 0.3573 | 0.2313 | 0.096  | -0.1   | 0.3302 | -0.557 | -0.192 | -0.976 | 0.0367 | -0.739 |
| PCHAS_142020 | -0.412 | -0.055 | 0.1107 | -0.048 | 0.0379 | 0.218  | 0.5069 | 0.7578 | 0.0351 | 0.2119 | 0.3485 | 0.0615 |
| PCHAS_092040 | 1.3511 | 0.3568 | 0.093  | -0.054 | -0.167 | -0.731 | -0.279 | -0.189 | -0.488 | -0.436 | 0.4814 | -0.362 |
| PCHAS_123800 | -0.154 | 0.1412 | -0.034 | 0.0096 | -0.101 | 0.0441 | 0.3008 | 0.3843 | -0.182 | -0.222 | 0.3085 | -0.38  |
| PCHAS_051810 | -0.194 | -0.355 | -0.186 | -0.156 | -0.183 | -0.098 | 0.6103 | 0.2617 | -0.274 | 0.616  | 0.3495 | 0.6164 |
| PCHAS_072650 | -0.726 | -2.281 | -2.738 | -2.689 | -0.873 | 0.2176 | -1.173 | -1.213 | 0.2116 | 1.6595 | 1.4589 | 1.9206 |
| PCHAS_146070 | -0.056 | 0.867  | 0.7084 | 0.8126 | 0.2609 | 0.2205 | 0.571  | 0.0068 | -0.024 | -0.822 | -1.806 | -0.399 |
| PCHAS_132430 | 0.7896 | 0.4277 | 0.5395 | 0.1044 | 0.0953 | -0.616 | -0.074 | -0.511 | -0.462 | -1.041 | -0.179 | -0.693 |
| PCHAS_071250 | -1.155 | -0.414 | -0.171 | -0.07  | -0.046 | -0.091 | 0.3629 | 0.7164 | -0.084 | 0.5934 | 0.6517 | 0.066  |
| PCHAS_061560 | 0.9448 | 0.5733 | 0.3779 | -0.059 | -0.316 | -0.464 | 0.1784 | -0.107 | -0.458 | -0.007 | 1.027  | 0.0094 |
| PCHAS_020760 | 0.1077 | 0.1691 | 0.0264 | -0.054 | -0.362 | 0.0583 | -0.404 | -0.005 | -0.131 | -0.448 | 0.1348 | -0.347 |
| PCHAS_142400 | -0.48  | -0.522 | -0.285 | -0.03  | 0.3117 | -0.042 | 1.2672 | 0.3228 | -0.008 | -0.462 | 0.3252 | -0.202 |
| PCHAS_052520 | -0.239 | 0.1182 | 0.3509 | 0.3103 | 0.1193 | 0.5592 | -0.316 | 0.0021 | 0.3936 | 0.2483 | -0.315 | 0.4435 |
| PCHAS_041050 | -0.103 | -0.261 | -0.809 | 0.6922 | 0.0191 | -0.198 | -0.152 | 0.6759 | -0.279 | 0.0507 | 0.1164 | 0.0606 |
| PCHAS_060700 | 0.6953 | 0.2848 | -0.051 | 0.2624 | -0.11  | -0.237 | -0.836 | -1.039 | -0.258 | -1.526 | -0.959 | -0.977 |
| PCHAS_140320 | 0.1911 | 0.2442 | 0.4087 | 0.0922 | 0.0502 | -0.059 | -0.037 | -0.597 | -0.05  | -1.008 | -0.868 | -0.738 |
| PCHAS_061290 | -0.388 | 0.1568 | 0.756  | 0.3203 | 0.111  | 0.1727 | 0.4743 | -0.055 | -0.106 | 0.4452 | -0.42  | -0.652 |
| PCHAS_113580 | -0.123 | -0.124 | 0.3926 | -0.001 | 0.2005 | -0.179 | 0.9939 | 0.3038 | -0.38  | 0.2977 | 0.6107 | 0.1542 |
| PCHAS_051540 | -0.305 | -0.424 | -0.167 | -0.115 | 0.0674 | 0.424  | 0.1362 | 0.3235 | 0.3547 | 0.1906 | 0.0273 | 0.3745 |
| PCHAS_050240 | 0.0705 | 0.137  | 0.2274 | 0.7581 | 0.3512 | 0.0752 | 0.315  | 0.0461 | -0.009 | -1.151 | -1.533 | -0.792 |
| PCHAS_071060 | -0.821 | -0.425 | 0.6333 | 0.4203 | 0.2468 | 0.2362 | 1.2889 | -0.04  | 0.4174 | 0.0211 | -0.294 | -0.538 |
| PCHAS_144830 | 0.0929 | -0.641 | -0.122 | -0.172 | -0.046 | -0.052 | -0.225 | -0.146 | -0.028 | 1.0268 | 0.6207 | 1.1152 |
| PCHAS_130740 | 1.0202 | 0.5849 | 0.2821 | 0.7646 | 0.1049 | 0.7496 | 0.5359 | 0.6937 | 0.7002 | 0.3146 | 0.2043 | 0.4598 |
| PCHAS_120220 | -0.659 | -0.87  | -0.387 | -0.825 | -0.076 | -0.092 | 0.7055 | 0.7892 | -0.192 | 0.4979 | 0.7155 | 0.0993 |
| PCHAS_111820 | 0.3636 | 0.3153 | 0.2539 | 0.2093 | 0.263  | -0.634 | -0.114 | -0.089 | -0.413 | -0.536 | -0.465 | -0.575 |
| PCHAS_132360 | -1.058 | -0.47  | -0.229 | 0.0886 | 0.133  | 0.0651 | 0.3573 | 0.3322 | 0.2007 | -0.545 | -0.23  | -0.634 |
| PCHAS_112400 | 0.1657 | -0.04  | -0.108 | -0.067 | -0.221 | -0.415 | 0.6477 | 0.2687 | -0.387 | 0.1919 | 0.2194 | -0.064 |
| PCHAS_071340 | -1.18  | -0.922 | -0.744 | -0.413 | -0.58  | -0.012 | -0.268 | 0.2371 | -0.039 | 0.4239 | 0.1792 | 0.3817 |
| PCHAS_146680 | 1.1422 | 0.3606 | -0.468 | 0.333  | 0.1972 | -0.166 | -1.021 | -0.152 | 0.0425 | -0.861 | -1.014 | -0.871 |
| PCHAS_145830 | 0.0076 | 0.3453 | 0.6712 | 0.8829 | 0.3284 | 0.014  | 0.2311 | -0.396 | -0.048 | -1.698 | -1.732 | -0.813 |

|              |        |        |        |        |        |        |        |        |        |        |        |        |
|--------------|--------|--------|--------|--------|--------|--------|--------|--------|--------|--------|--------|--------|
| PCHAS_140240 | -0.229 | -0.828 | -0.897 | -1.75  | -0.89  | -0.106 | -1.015 | -0.278 | -0.129 | 2.1411 | 2.1573 | 2.1677 |
| PCHAS_083180 | -0.016 | -0.518 | 1.1322 | -0.071 | 0.2347 | -0.06  | 0.0913 | -0.339 | -0.051 | -0.726 | -0.378 | -0.364 |
| PCHAS_101410 | -0.274 | -0.143 | 0.106  | 0.2135 | 0.0321 | 0.7043 | 0.7177 | 0.6917 | 0.5665 | 0.4944 | -0.37  | 0.6232 |
| PCHAS_071860 | -0.555 | 0.5642 | 0.5619 | -0.187 | -0.047 | -0.93  | -0.652 | -0.46  | -0.873 | -0.249 | 1.2483 | 0.066  |
| PCHAS_041730 | -0.551 | -0.1   | 0.3214 | -0.032 | 0.3243 | 0.0614 | -0.131 | 0.0624 | 0.0199 | -0.174 | 0.0257 | -0.337 |
| PCHAS_124400 | -0.228 | 0.1366 | 0.1262 | 0.2252 | -0.029 | 0.2268 | 0.0631 | 0.3754 | -0.015 | 0.2448 | -0.524 | 0.3759 |
| PCHAS_093560 | -0.307 | -0.807 | -0.423 | -0.563 | -0.097 | 0.4801 | -0.13  | 0.6234 | 0.5411 | 1.5035 | 0.6015 | 1.1493 |
| PCHAS_146870 | -0.076 | 0.0507 | 0.4739 | 0.3255 | 0.2164 | 0.0118 | -0.125 | -0.152 | -0.002 | -0.542 | -0.81  | -0.861 |
| PCHAS_120620 | 1.1491 | -0.504 | -0.297 | -0.732 | -0.521 | -0.209 | -0.02  | 0.0742 | -0.123 | 1.4611 | 2.0381 | 0.9131 |
| PCHAS_072560 | -0.135 | -0.081 | -0.055 | 0.0081 | -0.091 | -0.645 | -0.261 | -0.031 | -0.554 | -0.07  | 0.3174 | -0.402 |
| PCHAS_102760 | 0.3027 | -0.033 | -0.045 | -0.347 | 0.0477 | -0.153 | 0.658  | 0.6434 | -0.09  | 0.1182 | 0.7388 | -0.105 |
| PCHAS_101830 | 0.1845 | -0.645 | -0.494 | -0.073 | -0.014 | 0.0302 | 0.4795 | 0.1463 | 0.0606 | -0.221 | -0.792 | -0.283 |
| PCHAS_010410 | -1.003 | -0.951 | -0.683 | -0.322 | -0.013 | 0.1886 | 1.0726 | 0.9615 | 0.2382 | 0.5058 | 0.3807 | 0.0505 |
| PCHAS_131810 | -0.26  | -0.183 | -0.311 | 0.4891 | -0.097 | 0.1966 | 0.2488 | -0.543 | 0.08   | -0.616 | -1.017 | -0.435 |
| PCHAS_146410 | -0.815 | -0.445 | -0.328 | -0.104 | 0.0492 | 0.3803 | 0.6734 | 0.3116 | 0.4753 | 0.0401 | -0.373 | -0.193 |
| PCHAS_135110 | -0.355 | -0.59  | -0.533 | -0.724 | -0.121 | 0.0781 | 0.8894 | 0.8461 | 0.1568 | 1.1161 | 1.2301 | 0.8204 |
| PCHAS_113730 | -1.31  | -1.203 | -1.63  | -0.477 | 0.0856 | 0.7542 | 0.8449 | 0.6869 | 0.952  | -0.129 | -0.914 | -0.25  |
| PCHAS_083740 | -0.929 | -1.283 | -1.236 | -0.998 | -0.4   | 0.7432 | 0.623  | 0.6642 | 0.655  | 0.7377 | 0.0922 | 0.6522 |
| PCHAS_101580 | -0.065 | -0.056 | 0.0265 | 0.2161 | -0.045 | 0.0067 | 0.0176 | 0.071  | -0.043 | -0.58  | -0.436 | -0.4   |
| PCHAS_080870 | 0.3326 | 0.0471 | 0.5864 | 0.1056 | -0.729 | -0.367 | 0.2432 | 0.5642 | -0.19  | -0.29  | 0.231  | -0.221 |
| PCHAS_090980 | 0.8401 | 0.075  | -0.011 | -0.629 | -0.195 | -0.882 | 0.179  | -0.267 | -0.741 | 0.8955 | 0.4321 | 1.05   |
| PCHAS_141100 | 0.5189 | 0.3085 | -0.067 | 0.0621 | 0.1913 | 0.2553 | 0.3421 | -0.111 | 0.1109 | -0.653 | -0.276 | -0.319 |
| PCHAS_113090 | 0.526  | -0.038 | 0.72   | 0.0397 | 0.1961 | -0.074 | 1.2599 | 0.1983 | -0.028 | 0.2988 | 0.2679 | 0.1415 |
| PCHAS_040590 | -0.009 | -0.398 | 0.3585 | -0.249 | 0.1879 | -0.092 | 1.347  | 0.3531 | 0.1048 | 0.2891 | 0.4404 | -0.235 |
| PCHAS_110410 | -0.124 | -0.312 | -0.241 | -0.168 | -0.073 | 0.6278 | 0.1474 | 0.361  | 0.4926 | 1.5801 | 0.6983 | 1.1245 |
| PCHAS_062010 | -0.821 | -0.567 | -0.486 | -0.383 | 0.083  | 0.1867 | 0.5351 | 0.6816 | 0.2574 | 0.9159 | 0.7096 | 0.833  |
| PCHAS_142900 | -1.004 | -0.685 | -0.893 | -0.618 | -0.123 | 0.1961 | 0.6806 | 0.6009 | 0.2779 | 0.8372 | 0.647  | 0.7982 |
| PCHAS_135010 | 0.1535 | 0.119  | 0.403  | 0.2399 | 0.2671 | 0.2543 | -0.062 | 0.0962 | 0.0729 | 0.0133 | 0.0127 | 0.0196 |
| PCHAS_071490 | 0.3087 | 0.0247 | -0.048 | 0.0858 | 0.0187 | 0.351  | 0.1318 | 0.0229 | 0.3185 | -0.289 | 0.2595 | -0.187 |
| PCHAS_091000 | -1.468 | -1.723 | -1.764 | -1.495 | -0.218 | 0.2845 | 0.8846 | 1.3486 | 0.4038 | 0.987  | 0.7171 | 0.5114 |
| PCHAS_145140 | -1.724 | -0.451 | -0.794 | -0.864 | 0.0256 | -0.266 | -0.073 | 0.0214 | 0.1589 | -0.413 | -0.537 | -0.425 |
| PCHAS_050290 | 0.6543 | -0.559 | 0.3048 | 0.0949 | 0.0361 | -0.099 | 0.7615 | -0.064 | -0.058 | -0.215 | 0.0178 | -0.044 |
| PCHAS_114040 | -0.455 | 0.2419 | 0.1031 | 0.112  | 0.1366 | 0.2726 | 0.7875 | 0.2854 | -0.008 | -0.269 | 0.4197 | -0.21  |
| PCHAS_050050 | 0.8544 | 0.5267 | -0.245 | -0.181 | -0.545 | -0.281 | -1.017 | -0.799 | -0.328 | 0.1419 | 0.7675 | 0.4173 |
| PCHAS_113920 | -0.381 | 0.3631 | 0.4641 | 0.3971 | 0.1174 | 0.1712 | 0.3841 | -0.11  | 0.1585 | -0.644 | -0.925 | -0.33  |
| PCHAS_143130 | -0.383 | -1.004 | -0.279 | -1.006 | -0.16  | -0.022 | 1.1716 | 0.8792 | 0.0697 | 0.8748 | 1.2696 | 0.5688 |
| PCHAS_093460 | 0.437  | 0.1664 | -0.104 | 0.1425 | 0.0093 | 0.1974 | 0.0118 | 0.0039 | -0.221 | -0.474 | 0.0863 | 0.2679 |
| PCHAS_133810 | 0.3237 | 0.0648 | 0.3144 | -0.098 | 0.1645 | -0.336 | 0.6531 | -0.025 | -0.368 | -0.342 | 0.3814 | -0.122 |
| PCHAS_051020 | 0.2378 | 0.3737 | -0.162 | -0.414 | -0.104 | 0.4605 | -0.469 | -0.163 | 0.5166 | 1.4936 | 0.9908 | 1.2116 |
| PCHAS_083310 | -0.238 | -1.3   | -1.24  | -1.435 | -0.781 | -0.452 | -0.634 | -0.587 | -0.464 | 1.4068 | 2.1112 | 1.7251 |
| PCHAS_071020 | 0.4378 | 0.0445 | 0.2574 | -0.271 | -0.327 | -0.393 | -0.063 | -0.27  | -0.384 | -0.429 | 0.011  | -0.488 |
| PCHAS_134080 | -0.466 | 0.1554 | 0.8555 | 0.023  | 0.0522 | -0.13  | 0.2055 | -0.688 | 0.0499 | -0.082 | 0.0238 | -0.684 |
| PCHAS_112110 | 0.2852 | 0.3118 | 0.4191 | 0.0108 | 0.0469 | 0.1226 | 0.4803 | -0.033 | -0.068 | -0.128 | 1.0547 | -0.161 |
| PCHAS_082110 | 0.1699 | -0.243 | -0.556 | -0.279 | 0.0712 | 0.5104 | -0.365 | 0.2059 | 0.672  | 1.1118 | 0.1868 | 0.8379 |
| PCHAS_134510 | 0.161  | -0.591 | -1.268 | -0.184 | -0.058 | 1.2203 | -1.003 | 0.3036 | 0.9611 | 1.0382 | -0.312 | 1.1479 |
| PCHAS_072260 | 0.8536 | 0.7186 | 0.3133 | -0.374 | -0.415 | -0.739 | -0.839 | -0.952 | -0.804 | -0.744 | -0.465 | -0.639 |
| PCHAS_123830 | -0.591 | -0.505 | -0.348 | -0.163 | -0.04  | 0.1236 | 0.2386 | 0.6839 | 0.1993 | 0.4283 | 0.2822 | 0      |
| PCHAS_101010 | 1.6889 | -0.222 | 0.1313 | -0.156 | -0.075 | 0.106  | 0.1845 | -0.225 | 0.2019 | 1.0795 | 1.1509 | 0.7967 |
| PCHAS_050100 | 0.594  | 0.1097 | -0.102 | -0.625 | -0.455 | -0.08  | -1.549 | -0.229 | -0.029 | 2.0148 | 1.6035 | 2.1822 |
| PCHAS_010340 | 0.4506 | -0.489 | -0.561 | -0.315 | 0.1368 | 0.6359 | -0.06  | 0.0885 | 0.0095 | -0.519 | 1.012  | 0.2145 |

|              |        |        |        |        |        |        |        |        |        |        |        |        |
|--------------|--------|--------|--------|--------|--------|--------|--------|--------|--------|--------|--------|--------|
| PCHAS_134640 | -0.281 | -0.13  | 0.0151 | 0.3645 | 0.115  | 0.3134 | -0.277 | 0.0777 | 0.1754 | -0.095 | -0.649 | -0.11  |
| PCHAS_103770 | -0.073 | 0.3063 | 0.5104 | 0.3449 | 0.1815 | 0.105  | -0.224 | -0.11  | 0.0498 | -0.729 | -0.918 | -0.551 |
| PCHAS_071100 | 0.6765 | 0.2151 | 0.9893 | -0.059 | 0.0547 | -0.304 | 0.7038 | -0.006 | -0.399 | -0.222 | 0.3423 | -0.298 |
| PCHAS_041180 | -0.569 | 0.4456 | 0.461  | 0.4513 | 0.2375 | 0.5544 | 0.3905 | 0.383  | 0.252  | 0.1325 | 0.0497 | 0.5051 |
| PCHAS_102170 | -0.537 | -1.092 | -1.231 | -0.487 | 0.0069 | 0.4392 | 0.2611 | -0.02  | 0.0024 | 0.0926 | -0.137 | -0.09  |
| PCHAS_030840 | 0.5457 | 0.0286 | -0.353 | -0.223 | -0.204 | -0.185 | -0.02  | -0.028 | -0.18  | 0.6257 | -0.338 | 0.4516 |
| PCHAS_136580 | 0.1955 | -0.187 | 0.1784 | -0.095 | -0.043 | 0.2873 | 0.1028 | 0.4628 | 0.2693 | 0.6107 | 0.1774 | 0.4039 |
| PCHAS_120240 | 0.6216 | 0.306  | 0.6273 | -0.181 | 0.1624 | -0.005 | 0.4756 | -0.244 | -0.129 | -0.699 | 0.0009 | -0.66  |
| PCHAS_062100 | -1.225 | -0.31  | -0.443 | 0.1501 | 0.1673 | 0.1723 | 0.1057 | 0.4608 | 0.2692 | -0.177 | 0.0517 | -0.129 |
| PCHAS_120170 | -0.052 | -0.324 | 0.1782 | -0.029 | 0.2398 | 0.0595 | 0.5938 | 0.2164 | 0.1505 | -0.396 | -0.062 | -0.387 |
| PCHAS_135000 | -0.443 | -0.659 | -0.469 | -0.348 | -0.166 | -3E-04 | 0.2348 | 0.4883 | 0.0342 | 0.7181 | 0.4805 | 0.3921 |
| PCHAS_120670 | -0.153 | 0.1707 | 0.4366 | 0.2862 | 0.1729 | 0.3394 | -0.056 | 0.3005 | 0.2239 | 0.2715 | -0.213 | 0.0367 |
| PCHAS_102080 | -0.301 | 0.2227 | 0.887  | 0.2068 | -0.073 | 0.681  | 0.3463 | -0.608 | 0.2159 | -0.377 | -0.4   | -0.031 |
| PCHAS_141450 | -0.108 | 0.1351 | 0.3795 | 0.5942 | 0.2995 | 0.2129 | 0.2686 | 0.2769 | 0.1527 | -0.741 | -1.009 | -0.432 |
| PCHAS_135890 | 0.2605 | 0.1825 | -0.149 | -0.279 | -0.256 | -0.541 | -0.247 | -0.305 | -0.401 | -0.308 | 0.1178 | -0.347 |
| PCHAS_123510 | 0.5259 | -0.139 | 0.4489 | -0.166 | 0.077  | -0.313 | -0.067 | 0.1965 | -0.467 | 0.026  | 0.1872 | -0.271 |
| PCHAS_134090 | -0.77  | -0.786 | -0.274 | 0.1438 | 0.1587 | 0.237  | -0.101 | -0.473 | 0.0753 | -0.058 | -0.406 | -0.549 |
| PCHAS_114030 | 0.6763 | 0.5159 | 0.6646 | 0.2809 | 0.3304 | 0.1649 | 0.1793 | 0.1794 | -0.017 | -0.98  | -0.988 | -0.556 |
| PCHAS_051890 | 0.7115 | 0.5047 | 0.163  | 0.2553 | 0.0525 | -0.049 | -0.496 | -0.564 | -0.153 | -0.699 | -0.553 | -0.413 |
| PCHAS_010490 | -0.219 | 0.2034 | 0.1884 | -0.165 | -0.049 | -0.463 | 0.3864 | -0.13  | -0.523 | -0.556 | -1.425 | -0.472 |
| PCHAS_011300 | 1.0892 | 0.5361 | 0.0576 | -0.453 | -0.577 | -0.946 | -0.815 | -0.867 | -1     | -0.112 | 1.3689 | 0.383  |
| PCHAS_082510 | 0.0917 | -0.083 | -0.105 | -0.18  | -0.045 | -0.138 | 0.2873 | 0.1927 | -0.147 | -0.358 | 0.2724 | -0.382 |
| PCHAS_100640 | -1.04  | -0.798 | -0.588 | 0.2953 | 0.1411 | 0.2217 | -0.167 | 0.0573 | 0.2297 | -0.054 | -1.024 | -0.139 |
| PCHAS_020540 | 0.9856 | 0.6042 | 0.7085 | 1.0423 | 0.2492 | 0.4414 | 0.441  | 0.0082 | 1.3227 | 0.1842 | 1.2731 | 0.1471 |
| PCHAS_092020 | 0.6365 | 0.5932 | 0.3493 | 0.02   | -0.106 | -0.112 | 0.0448 | -0.045 | -0.203 | -0.446 | 0.3245 | 0.0439 |
| PCHAS_134450 | 0.6461 | 0.2166 | 0.4363 | 0.0267 | 0.1296 | -0.065 | 0.2456 | 0.2635 | -0.017 | 0.7681 | -0.009 | 0.4182 |
| PCHAS_136160 | -0.085 | 0.2444 | 0.282  | 0.7399 | 0.4039 | -0.142 | -0.015 | -0.2   | -0.059 | -0.6   | -0.706 | -0.401 |
| PCHAS_112260 | -1.531 | -0.52  | -0.109 | 0.0122 | 0.0907 | 0.1993 | 1.1464 | 0.7537 | -0.01  | -0.295 | -0.02  | -0.5   |
| PCHAS_081900 | 0.8148 | 0.6202 | 0.4362 | 0.1277 | -0.053 | -0.113 | 0.3195 | -0.02  | -0.14  | -0.258 | 0.206  | 0.0703 |
| PCHAS_020450 | -0.827 | -0.747 | 0.775  | 0.3406 | 0.1531 | -0.262 | 0.487  | 0.1421 | -0.079 | -0.909 | -0.503 | -0.408 |
| PCHAS_091070 | 0.2037 | -1.54  | 0.6035 | -0.398 | -0.573 | -0.33  | 0.4424 | -0.616 | -0.606 | -0.771 | -1.05  | -0.898 |
| PCHAS_103840 | 0.885  | 0.3672 | 0.2874 | -0.029 | -0.179 | -0.633 | 0.2624 | -0.962 | -0.828 | -1.628 | -0.181 | -0.394 |
| PCHAS_130450 | -0.359 | -0.182 | -0.097 | -0.234 | 0.1428 | 0.0085 | 0.4227 | 0.0364 | 0.0525 | -0.123 | -0.412 | -0.093 |
| PCHAS_122290 | 0.258  | 0.0266 | 0.0557 | 0.4746 | 0.194  | 0.0534 | -0.216 | -0.435 | -0.08  | -0.479 | -1.015 | -0.742 |
| PCHAS_133430 | -0.7   | 0.0838 | -0.373 | 0.3757 | 0.1307 | 0.173  | -0.049 | -0.178 | 0.142  | -0.778 | -0.872 | -0.731 |
| PCHAS_090070 | -0.127 | 0.0684 | 0.3708 | -0.389 | 0.2119 | 0.2216 | -0.075 | -0.073 | 0.0428 | -0.145 | -0.086 | -0.153 |
| PCHAS_030940 | -0.816 | -0.316 | -0.711 | -0.295 | -0.218 | -0.185 | 0.2375 | 0.6458 | -0.154 | 0.2403 | 0.2488 | -0.046 |
| PCHAS_091170 | -0.049 | 1.2706 | 0.7108 | 0.6181 | -0.039 | 1.9482 | 0.0024 | 1.1257 | 0.7761 | 0.5215 | 0.5345 | 0.6813 |
| PCHAS_041020 | 0.4447 | 0.1875 | 0.2895 | 0.178  | 0.3623 | -0.186 | 0.4137 | 0.1705 | -0.057 | -0.867 | -1.04  | -0.816 |
| PCHAS_120500 | -1.231 | -0.923 | -0.703 | -0.482 | -0.046 | 0.2217 | 0.7879 | 1.1012 | 0.3108 | 0.2123 | 0.5655 | -0.009 |
| PCHAS_081810 | -0.203 | -0.04  | -0.059 | -0.372 | -0.246 | 0.0078 | 0.1121 | 0.2903 | -0.042 | -0.157 | 0.0357 | -0.436 |
| PCHAS_123080 | 0.4443 | 0.0789 | -0.048 | 0.1718 | 0.0956 | 0.082  | -0.393 | -0.047 | 0.1211 | 0.2223 | -0.607 | 0.0482 |
| PCHAS_112480 | -0.322 | 0.0966 | 0.0727 | 0.1604 | -0.061 | 0.2102 | -0.682 | 0.1287 | 0.1641 | 0.8546 | 1.2434 | 0.4718 |
| PCHAS_114470 | 0.2134 | -0.175 | 0.6358 | 0.2237 | 0.0585 | 0.3382 | -0.489 | 0.2519 | -0.082 | 0.3432 | 0.5322 | 0.0466 |
| PCHAS_123250 | -0.128 | 0.2564 | -0.966 | 0.3287 | -0.398 | 0.7054 | 1.0417 | 0.2505 | 0.9851 | 0.532  | 0.7093 | 0.1624 |
| PCHAS_040440 | -0.285 | 0.4662 | -0.012 | 0.3846 | 0.2619 | -0.061 | 0.199  | -0.326 | -0.055 | 0.222  | -0.069 | 0.1407 |
| PCHAS_132690 | -0.56  | -1.147 | -1.235 | -0.202 | 0.288  | 0.2487 | -0.368 | -0.179 | 0.0898 | -0.083 | -1.007 | -0.309 |
| PCHAS_133910 | -0.712 | -0.012 | 0.3037 | -0.069 | 0.0685 | -0.178 | 0.2978 | -0.07  | -0.09  | -0.526 | -0.467 | -0.572 |
| PCHAS_093450 | 0.0097 | -0.1   | -0.023 | 0.0137 | 0.0924 | 0.1572 | -0.173 | 0.3327 | 0.1561 | -0.219 | -0.159 | 0.0341 |
| PCHAS_020900 | -0.081 | 0.1481 | 0.4724 | 0.2803 | 0.1441 | -0.018 | -0.421 | -0.356 | -0.034 | -0.55  | -0.971 | -0.727 |



|              |        |        |        |        |        |        |        |        |        |        |        |        |
|--------------|--------|--------|--------|--------|--------|--------|--------|--------|--------|--------|--------|--------|
| PCHAS_101370 | -0.198 | 0.1292 | 0.6159 | -0.097 | 0.0796 | -0.135 | 0.6816 | 0.117  | -0.258 | -0.13  | -0.324 | 0.0361 |
| PCHAS_113110 | -1.416 | -2.216 | -2.464 | -1.559 | -0.297 | 0.7514 | 0.8969 | 0.7117 | 0.7065 | 1.019  | -0.215 | 0.9488 |
| PCHAS_020890 | 0.5244 | -0.325 | -0.64  | -0.334 | -0.546 | -0.312 | -0.471 | 0.1966 | -0.278 | 0.5961 | 1.9978 | 0.0512 |
| PCHAS_081850 | 0.658  | 2.3764 | 0.3485 | 0.6036 | -0.032 | 0.6779 | 0.4121 | 0.8874 | 1.0985 | -0.232 | 1.5424 | 0.644  |
| PCHAS_030750 | 0.9106 | 0.3469 | 0.5456 | -0.039 | -0.54  | -0.465 | 0.1892 | 0.0163 | -0.404 | -0.723 | 0.2033 | -0.269 |
| PCHAS_136940 | 0.7342 | 0.3344 | 0.3544 | -0.002 | -0.13  | -0.381 | -0.449 | -0.45  | -0.518 | 0.1874 | 0.2917 | -0.081 |
| PCHAS_121690 | 0.4096 | 0.4355 | 0.1708 | -0.073 | -0.298 | 0.2672 | 0.0681 | 0.249  | -0.021 | 0.1543 | 0.5818 | 0.0562 |
| PCHAS_111330 | -0.206 | 0.5663 | 0.3266 | 0.2146 | 0.1887 | 0.2613 | -0.097 | -0.066 | 0.3336 | 0.0952 | -2.51  | 0.4183 |
| PCHAS_145820 | 0.208  | 0.2256 | 0.1951 | 0.3473 | 0.0748 | 0.2609 | 1.3045 | 0.2532 | -0.002 | -0.279 | -0.016 | -0.129 |
| PCHAS_041840 | 0.4006 | 0.231  | 0.3531 | -0.019 | 0.3602 | -0.098 | 0.1543 | 0.2311 | -0.203 | -0.411 | -0.131 | -0.091 |
| PCHAS_071280 | 0.0908 | -0.142 | -0.032 | -0.347 | -0.03  | 0.162  | -0.12  | 0.0315 | -0.156 | 0.6419 | 0.8572 | 0.7617 |
| PCHAS_112680 | -0.611 | 0.0375 | 0.1202 | 0.1494 | 0.1226 | 0.0371 | -0.09  | 0.0743 | 0.0071 | -0.855 | -0.754 | -0.709 |
| PCHAS_145370 | 0.6354 | 0.1021 | 0.3806 | 0.0526 | 0.0161 | -0.008 | 0.5166 | 0.1622 | 0.1602 | 0.1498 | 0.6505 | 0.3186 |
| PCHAS_124380 | 0.03   | 0.648  | 0.6131 | -0.024 | 0.0934 | -0.017 | -0.711 | -0.656 | -0.309 | -1.574 | -0.577 | -0.495 |
| PCHAS_112150 | 1.045  | -0.195 | 0.0097 | 0.0429 | -0.022 | -0.228 | 1.0739 | 0.6328 | 0.0414 | -0.215 | 1.0822 | -0.317 |
| PCHAS_124410 | -0.384 | -0.925 | 0.7603 | 0.2966 | 0.0683 | 0.1453 | -0.058 | 0.0281 | -0.131 | -0.504 | 0.538  | -0.184 |
| PCHAS_123300 | 0.0158 | -0.168 | 0.9768 | 0.4377 | 0.0043 | -0.398 | -0.727 | -0.287 | -0.226 | 0.0476 | -0.819 | -0.185 |
| PCHAS_124220 | -1.238 | -2.059 | -2.398 | -1.418 | -0.493 | 0.185  | -0.012 | 0.5781 | 0.221  | 1.2332 | 0.4609 | 0.8988 |
| PCHAS_122080 | 0.631  | 0.1544 | 0.5282 | 0.192  | -3E-04 | -0.248 | 0.4089 | 0.1348 | -0.167 | -0.517 | -0.955 | -0.614 |
| PCHAS_090090 | 0.0078 | -0.563 | 0.4015 | 0.2549 | 0.1726 | 0.0331 | 0.4657 | 0.0335 | 0.226  | -0.386 | 0.4699 | 0.0484 |
| PCHAS_051880 | 0.0156 | -0.011 | 0.0128 | 0.1999 | 0.1326 | -0.021 | 0.115  | -0.031 | 0.0248 | -0.629 | -0.679 | -0.211 |
| PCHAS_124000 | 0.567  | 0.6832 | 0.6386 | 0.2322 | 0.1413 | 0.214  | 1.1389 | -0.104 | 0.1579 | 0.0364 | 0.2408 | 0.1634 |
| PCHAS_093580 | -0.397 | 0.3361 | 0.6218 | 0.1909 | -0.001 | -0.718 | -0.107 | -0.057 | -0.622 | -0.775 | -0.013 | -0.571 |
| PCHAS_061470 | -0.429 | 0.1092 | 0.0258 | 0.3091 | -0.012 | 0.0916 | 0.0963 | 0.1526 | 0.0277 | 0.8568 | 0.4196 | 0.6755 |
| PCHAS_143490 | 0.4377 | 0.5045 | -0.347 | 0.5245 | 0.1603 | 0.0739 | 0.1668 | -0.345 | 0.2098 | -1.03  | -0.276 | -0.558 |
| PCHAS_135290 | 0.2838 | -0.279 | 0.3295 | 0.4056 | 0.0775 | -0.198 | -0.497 | -0.63  | -0.268 | -1.028 | -0.506 | -0.746 |
| PCHAS_122890 | -0.605 | 0.6825 | 0.9218 | 0.2717 | -0.007 | -0.662 | -0.954 | -1.434 | -0.681 | -1.834 | -1.373 | -1.652 |
| PCHAS_030790 | -0.321 | 0.0362 | 0.2813 | 0.1209 | 0.2637 | -0.111 | -0.234 | 0.0444 | -0.22  | -0.37  | -0.222 | -0.261 |
| PCHAS_133990 | -0.176 | 0.0406 | -0.019 | -0.119 | -0.206 | -0.445 | 0.1957 | -0.333 | -0.42  | -0.372 | 0.4553 | -0.011 |
| PCHAS_134740 | 1.2397 | 0.3414 | 0.1301 | -0.59  | -0.528 | 0.208  | -0.56  | -0.717 | -0.533 | 0.3189 | 1.5469 | 0.653  |
| PCHAS_062360 | 0.5696 | 0.1784 | 0.4528 | -0.029 | -0.074 | -0.065 | -0.512 | -0.466 | -0.452 | -0.396 | -0.059 | -0.575 |
| PCHAS_113360 | -0.453 | 0.0708 | 0.1146 | 0.1393 | 0.3242 | -0.148 | 0.4404 | -0.018 | 0.3469 | -0.963 | -0.645 | -1.117 |
| PCHAS_051570 | -0.435 | 0.141  | -0.177 | -0.057 | -0.127 | 0.4208 | 0.0246 | 0.1538 | 0.1181 | 0.0099 | 0.3181 | 0.1007 |
| PCHAS_140360 | -0.696 | -0.121 | 0.3575 | 0.1702 | 0.037  | 0.0361 | 0.1278 | 0.3418 | -0.01  | -0.32  | 0.1053 | -0.362 |
| PCHAS_031600 | 0.0716 | 0.9978 | 0.4595 | 0.3814 | 0.0835 | -0.154 | -0.413 | -0.359 | -0.104 | -0.04  | -1.11  | -0.033 |
| PCHAS_050940 | 0.127  | -0.27  | -0.216 | -0.468 | -0.324 | 0.1582 | 0.8372 | 0.5007 | 0.196  | 0.7537 | 0.2367 | 0.4968 |
| PCHAS_134430 | -0.805 | -0.185 | -0.493 | 0.1833 | 0.1346 | 0.6606 | 0.0737 | -0.045 | 0.627  | -0.567 | -0.016 | -0.344 |
| PCHAS_061910 | -0.392 | 0.0897 | 0.3168 | 0.4153 | 0.0268 | 0.1429 | -0.299 | -0.17  | -0.025 | -0.655 | -1.015 | -0.604 |
| PCHAS_041220 | -0.226 | 0.1091 | 0.1755 | 0.311  | 0.2123 | -0.309 | -0.446 | -0.13  | -0.339 | -0.177 | -0.815 | -0.433 |
| PCHAS_131630 | 0.8815 | 0.4858 | 0.5066 | 0.1046 | -0.179 | -0.713 | -0.353 | -0.605 | -0.833 | -1.059 | -0.105 | -0.69  |
| PCHAS_136860 | 0.1225 | 0.2184 | 0.3656 | -0.063 | 0.0682 | -0.291 | 0.463  | 0.3065 | -0.104 | 0.2917 | -0.322 | -0.15  |
| PCHAS_131740 | 0.4159 | 0.4505 | 0.2451 | 0.3753 | -0.047 | 0.351  | 0.2511 | 0.0461 | 0.272  | -0.271 | 0.4978 | -0.016 |
| PCHAS_143470 | 1.008  | 0.5879 | -0.192 | 0.1129 | -0.368 | -0.287 | 0.5457 | 0.5073 | -0.216 | -0.081 | 1.1621 | 0.8528 |
| PCHAS_031510 | -0.087 | 0.4263 | -0.027 | 0.6979 | 0.188  | -0.601 | 0.0801 | -0.071 | -0.21  | -0.658 | -0.83  | 0.1428 |
| PCHAS_142950 | 0.5058 | -0.036 | 0.5792 | 0.0442 | -0.012 | -0.079 | -0.196 | -0.182 | -0.174 | -0.022 | 0.1319 | -0.106 |
| PCHAS_142730 | -0.052 | 0.0612 | 0.5824 | 0.4008 | 0.1185 | 0.1465 | 0.2735 | -0.404 | -0.043 | -1.286 | -0.39  | -0.826 |
| PCHAS_145590 | -0.698 | -0.133 | -0.017 | 0.0043 | 0.0884 | 0.1394 | 0.7686 | 0.7373 | 0.1721 | -0.118 | 0.2735 | -0.387 |
| PCHAS_124280 | 0.7249 | -0.801 | -0.04  | -1.052 | -0.032 | 0.0771 | 0.6038 | 0.7351 | -0.156 | 1.1088 | 0.9399 | 0.9563 |
| PCHAS_133510 | 0.3806 | 0.2687 | 0.5284 | 0.2934 | 0.1162 | 0.1792 | 0.4382 | 0.1548 | 0.0711 | -0.915 | -0.35  | -0.619 |
| PCHAS_102140 | 0.1322 | -0.01  | 0.2068 | -0.068 | -0.441 | -0.092 | 0.5588 | -0.051 | -0.348 | -0.82  | -1.026 | -0.603 |

|              |        |        |        |        |        |        |        |        |        |        |        |        |
|--------------|--------|--------|--------|--------|--------|--------|--------|--------|--------|--------|--------|--------|
| PCHAS_142910 | 0.2712 | 0.5135 | 0.4188 | 0.339  | 0.221  | -0.254 | -0.105 | -0.381 | -0.217 | -1.585 | -0.883 | -0.842 |
| PCHAS_141070 | 0.8706 | 0.1465 | 0.3009 | 0.0782 | -0.035 | -0.131 | 0.8957 | 0.1347 | -0.111 | -0.293 | 0.2786 | -0.174 |
| PCHAS_134560 | 0.2397 | -0.123 | 0.0494 | -0.122 | -0.054 | 0.7145 | -0.126 | 0.0407 | 0.2866 | 0.8243 | 0.434  | 0.9245 |
| PCHAS_020820 | 0.1223 | 0.1305 | 0.2507 | 0.5975 | 0.3233 | 0.7388 | 0.2483 | -0.066 | 0.6496 | -1.108 | -0.775 | -0.51  |
| PCHAS_090550 | 0.2955 | -0.004 | -0.039 | -0.037 | -0.183 | 0.3482 | -0.156 | 0.3095 | 0.1981 | 0.8986 | 0.8851 | 0.8577 |
| PCHAS_101200 | 0.6939 | -0.84  | -1.184 | 0.7461 | 0.1046 | 0.6857 | -0.434 | -0.255 | 0.0923 | -0.738 | -0.225 | -0.054 |
| PCHAS_121990 | -1.317 | -1.096 | -0.545 | -0.713 | -0.242 | 0.0711 | 0.6163 | 0.7399 | 0.0524 | 0.58   | 0.4999 | 0.2776 |
| PCHAS_123760 | 0.2556 | 0.1498 | 0.1573 | 0.0217 | 0.0633 | 0.3961 | -0.471 | 0.0045 | 0.3563 | 0.8807 | -0.009 | 0.3458 |
| PCHAS_091400 | 1.9936 | 0.0017 | 0.0829 | 0.4601 | -0.479 | 0.6805 | 1.744  | 1.2352 | 0.0854 | 0.8842 | 0.1769 | 0.1841 |
| PCHAS_062060 | -0.296 | 0.109  | 0.3538 | -0.146 | 0.1403 | -0.111 | 0.7248 | 0.2813 | -0.033 | -0.21  | 0.0205 | -0.358 |
| PCHAS_030780 | -0.203 | 0.4079 | 0.6093 | -0.336 | -0.178 | -0.606 | 0.678  | -0.134 | -0.437 | -0.535 | -0.234 | -0.391 |
| PCHAS_082140 | -0.612 | 0.2658 | 0.3716 | 0.6239 | 0.4865 | -0.059 | -0.231 | -0.127 | -0.043 | -0.838 | -1.676 | -0.832 |
| PCHAS_130560 | 0.6603 | 0.2008 | 0.0663 | 0.0655 | 0.185  | -0.199 | 0.3633 | -0.139 | -0.233 | -0.514 | -0.54  | -0.47  |
| PCHAS_140840 | 0.4871 | 0.0005 | -1.353 | 0.3876 | 0.0015 | 1.067  | 0.3506 | -0.563 | 0.7065 | 0.543  | 0.8057 | 0.6974 |
| PCHAS_143270 | -0.682 | -0.154 | 0.1077 | 0.1364 | 0.34   | 0.8053 | 0.9536 | 0.6455 | 0.5967 | -0.297 | 0.1013 | -0.107 |
| PCHAS_136570 | -0.424 | 0.1924 | 0.274  | 0.3676 | 0.1601 | 0.2671 | -0.672 | -0.256 | 0.0985 | -0.726 | -0.958 | -0.721 |
| PCHAS_020130 | 0.1578 | 0.1446 | -0.207 | -0.195 | -0.096 | -0.375 | 0.024  | 0.0648 | -0.278 | 0.1115 | 0.6585 | 0.0483 |
| PCHAS_052020 | 0.1173 | 0.6353 | 0.1179 | 0.0461 | 0.1164 | 0.5448 | -0.136 | -0.149 | 0.4367 | 0.2463 | 0.4909 | 0.403  |
| PCHAS_144700 | 0.7704 | -0.412 | 0.204  | -0.218 | 0.1274 | -0.338 | 0.4342 | 0.784  | -0.288 | 0.3549 | 0.854  | 0.4899 |
| PCHAS_133940 | 0.1304 | -0.558 | -0.26  | -0.136 | 0.1643 | 0.0159 | 0.1402 | 0.6287 | 0.0517 | 0.1342 | 0.2584 | 0.1544 |
| PCHAS_071500 | 1.2667 | 0.3872 | 0.5854 | 0.0326 | -0.282 | -0.718 | -0.036 | -0.229 | -0.524 | -1.242 | -0.507 | -0.667 |
| PCHAS_103250 | -0.925 | -0.846 | -0.671 | -0.857 | -0.38  | -0.263 | -1.179 | -0.619 | -0.08  | 2.0766 | 1.9471 | 1.7213 |
| PCHAS_091900 | -0.078 | 0.2172 | 0.7675 | -0.001 | 0.199  | -0.193 | -0.605 | -0.346 | -0.548 | -0.592 | -0.526 | -0.337 |
| PCHAS_061600 | -0.384 | 0.6221 | -0.013 | -0.413 | -0.06  | 0.1075 | 0.1245 | 0.2707 | 0.067  | 1.2265 | 0.7084 | 0.6881 |
| PCHAS_136320 | -0.809 | -0.405 | 0.1762 | -0.088 | 0.1018 | 0.223  | 0.347  | 0.4215 | 0.0919 | -0.069 | 0.0707 | -0.534 |
| PCHAS_061120 | 0.6919 | 0.3733 | 0.6197 | 0.3702 | 0.1844 | 0.5331 | 0.0831 | -0.101 | 0.5774 | -0.292 | 0.1529 | -0.009 |
| PCHAS_011180 | 0.5217 | 0.4179 | -0.121 | 0.2537 | -0.135 | -0.575 | -0.568 | -0.378 | -0.609 | -1.121 | -0.677 | -0.608 |
| PCHAS_090760 | -0.499 | 0.0015 | -0.026 | -0.06  | -0.197 | -0.686 | -0.108 | -0.419 | -0.45  | -0.007 | 0.5153 | -0.327 |
| PCHAS_111720 | -1.56  | -1.609 | -1.783 | -1.022 | -0.209 | 0.3641 | 0.955  | 0.9948 | 0.5276 | 0.3189 | 0.2177 | 0.1599 |
| PCHAS_143280 | -0.984 | -0.164 | -0.287 | 0.4782 | 0.1524 | 0.4725 | 0.2662 | 0.0724 | 0.4349 | 0.0335 | -0.436 | -0.192 |
| PCHAS_141820 | 0.7271 | 0.4449 | 0.2816 | 0.1617 | -0.286 | -0.612 | -0.208 | -0.554 | -0.587 | -1.025 | -0.368 | -0.496 |
| PCHAS_051830 | -0.739 | 0.1996 | 0.4696 | 0.2981 | 0.2689 | -0.132 | -0.041 | -0.159 | -0.096 | -0.253 | 0.3795 | -0.494 |
| PCHAS_031590 | -1.009 | -0.639 | -0.763 | -0.193 | 0.0017 | 0.2013 | 0.2744 | 0.5405 | 0.2399 | 0.2393 | 0.0756 | 0.188  |
| PCHAS_112970 | -0.206 | -0.32  | 0.0845 | -0.456 | -0.047 | -0.173 | 0.3174 | -0.004 | -0.325 | 0.2809 | 0.3538 | -0.096 |
| PCHAS_093700 | -0.997 | -0.28  | 0.0865 | 0.3607 | 0.191  | 0.5818 | 0.9177 | 0.1896 | 0.614  | -0.501 | -0.25  | -0.713 |
| PCHAS_091820 | 0.3977 | 0.4623 | 0.2336 | 0.3003 | 0.1285 | -0.527 | 0.2119 | -0.178 | -0.287 | -0.555 | -0.17  | -0.587 |
| PCHAS_104010 | -0.239 | 0.0698 | 0.0218 | 0.2695 | 0.0355 | 0.0145 | -0.018 | 0.1197 | -0.027 | -0.528 | -0.56  | -0.316 |
| PCHAS_135190 | 0.2873 | 0.5655 | 0.4662 | 0.1767 | 0.0985 | -0.261 | -0.053 | 0.248  | -0.141 | -0.079 | 0.7028 | -0.212 |
| PCHAS_132290 | -0.872 | -0.166 | 0.3065 | 0.0819 | 0.1234 | 0.1311 | 1.279  | 0.6641 | 0.0898 | -0.1   | -0.013 | -0.24  |
| PCHAS_102070 | -0.034 | 0.3935 | 0.4704 | 0.5684 | 0.0434 | -0.246 | -0.868 | -0.232 | -0.199 | -1.234 | -1.551 | -1.008 |
| PCHAS_101390 | -0.066 | 0.569  | 0.3114 | 0.1349 | 0.0782 | -0.265 | -0.305 | 0.1619 | -0.013 | 0.0581 | -0.176 | -0.457 |
| PCHAS_090110 | 0.2322 | -0.065 | 0.1336 | 0      | -0.04  | -0.366 | 0.2129 | -0.053 | -0.394 | -0.686 | 0.0052 | -0.675 |
| PCHAS_091270 | -0.29  | -0.122 | 0.213  | -0.144 | -0.028 | -0.387 | 0.9963 | 0.0711 | -0.295 | 0.1819 | 0.0681 | 0.2045 |
| PCHAS_090320 | 0.3072 | -0.193 | -0.114 | -0.274 | -0.058 | 0.038  | 0.047  | 0.143  | -0.059 | 0.0676 | -0.068 | 0.0793 |
| PCHAS_143580 | -0.051 | -0.42  | 0.2355 | 0.347  | 0.0827 | 0.3248 | -0.434 | 0.1077 | 0.3503 | -0.25  | -0.711 | -0.344 |
| PCHAS_021030 | 1.2389 | -0.607 | 0.1689 | -0.402 | 0.0851 | -0.115 | 0.1458 | 0.6028 | -0.109 | 0.8578 | 0.7729 | 0.2719 |
| PCHAS_101170 | -0.082 | 0.2924 | 0.2855 | 0.1934 | -0.14  | -0.022 | -0.112 | -0.499 | 0.0408 | -1.009 | -0.916 | -0.748 |
| PCHAS_020170 | 0.0757 | -0.011 | 0.2826 | -0.095 | -0.146 | -0.002 | 0.3466 | 0.0282 | 0.0584 | -0.307 | 0.6682 | -0.337 |
| PCHAS_041660 | -0.341 | -0.818 | -0.293 | -0.906 | -0.195 | 0.3963 | 0.244  | 0.7514 | 0.1781 | 1.2891 | 1.1078 | 0.6204 |
| PCHAS_101640 | -0.541 | -0.054 | -0.158 | 0.1654 | 0.3424 | 0.0059 | 0.3644 | 0.0523 | 0.2971 | -0.486 | -0.628 | -0.138 |

|              |        |        |        |        |        |        |        |        |        |        |        |        |
|--------------|--------|--------|--------|--------|--------|--------|--------|--------|--------|--------|--------|--------|
| PCHAS_083650 | 0.4611 | 0.303  | 0.1582 | 0.1852 | 0.0492 | -0.066 | -0.862 | -0.301 | -0.188 | -0.42  | -0.279 | -0.013 |
| PCHAS_124210 | 0.6784 | -0.177 | 0.3827 | -0.195 | 0.0027 | -0.129 | 0.9808 | 0.1472 | -0.038 | -0.168 | 0.2909 | -0.192 |
| PCHAS_133880 | 0.945  | 0.6168 | 0.2531 | 0.1605 | -0.186 | -0.225 | -0.21  | -0.765 | -0.432 | -1.113 | -0.12  | -0.359 |
| PCHAS_031680 | -1.207 | -1.725 | -1.918 | -1.161 | -0.339 | -0.018 | 1.03   | 1.3032 | 0.3142 | 0.7719 | 0.7206 | 0.7579 |
| PCHAS_136670 | 0.1632 | -0.228 | -0.174 | -0.011 | 0.0095 | 0.3597 | -0.343 | 0.4668 | 0.0589 | 0.8911 | 0.4566 | 0.7531 |
| PCHAS_104090 | 0.3354 | -0.018 | 0.0152 | -0.261 | -0.428 | -0.424 | 0.0772 | -0.29  | -0.435 | 0.0296 | -0.279 | 0.0069 |
| PCHAS_131610 | 0.7352 | -0.951 | -0.047 | -0.811 | -0.052 | 0.0836 | 0.1077 | 0.5567 | -0.021 | 1.4228 | 1.4594 | 0.7688 |
| PCHAS_103670 | 0.6377 | 0.076  | 0.231  | -0.249 | -0.062 | 0.0431 | 0.2008 | 0.5544 | -0.062 | 0.2015 | 0.6283 | -0.038 |
| PCHAS_134900 | 0.1943 | -1.607 | -0.092 | -0.639 | -0.082 | 0.1388 | 0.0197 | -0.239 | -0.028 | 0.3727 | 0.6637 | 0.1709 |
| PCHAS_073050 | 0.6664 | 0.405  | 0.281  | 0.2646 | 0.1031 | 0.2184 | -0.34  | 0.0567 | 0.2977 | -0.145 | -0.76  | 0.0558 |
| PCHAS_091810 | -0.58  | -1.559 | -1.088 | -0.711 | -0.083 | 0.234  | 1.2753 | 1.1421 | 0.2678 | 0.2967 | 0.3884 | 0.1239 |
| PCHAS_093080 | 0.2595 | -0.419 | -0.74  | -0.657 | -0.139 | 0.0458 | -0.099 | 0.6473 | 0.1264 | 1.5238 | 0.7153 | 0.6886 |
| PCHAS_072550 | 0.2022 | 0.5615 | 0.203  | -0.246 | -0.144 | -0.306 | -0.558 | -0.484 | -0.471 | #####  | 0.1281 | 0.0651 |
| PCHAS_124500 | -0.173 | -0.166 | -0.039 | 0.3015 | 0.3211 | -0.052 | 0.2583 | 0.0153 | 0.01   | -0.62  | -0.172 | -0.73  |
| PCHAS_093480 | -0.548 | -0.036 | 0.1575 | -0.183 | -0.064 | -0.111 | 1.3743 | 0.3253 | -0.128 | -0.251 | -0.118 | -0.065 |
| PCHAS_144200 | 0.2907 | 0.8686 | 0.6428 | 0.2316 | 0.066  | -0.186 | -0.16  | -0.212 | -0.152 | -0.841 | -0.891 | -0.6   |
| PCHAS_040960 | 0.2459 | -0.326 | 0.0236 | -0.377 | -0.31  | -0.71  | -0.18  | 0.1328 | -0.733 | -0.119 | 0.5024 | -0.062 |
| PCHAS_121800 | -0.175 | -0.311 | 0.3923 | -0.333 | 0.0537 | 0.1119 | 0.5306 | 0.7538 | 0.0224 | -0.826 | 0.5511 | -0.317 |
| PCHAS_030160 | 0.8101 | 0.4248 | 0.3603 | 0.2055 | 0.0004 | 0.1844 | 0.2374 | 0.2584 | 0.0425 | 0.1529 | 0.4653 | -0.052 |
| PCHAS_122260 | 0.3743 | 0.4039 | 0.0554 | 0.1848 | 0.1544 | -0.1   | 0.2816 | 0.2782 | -0.187 | 0.3767 | 1.4143 | 0.1469 |
| PCHAS_121190 | -0.236 | 0.2577 | 0.6386 | 0.5805 | 0.3837 | -0.296 | -0.159 | -0.231 | -0.358 | -1.331 | -2.16  | -0.984 |
| PCHAS_144010 | -0.625 | -0.382 | -0.49  | -0.249 | -0.085 | 0.026  | 0.3022 | 0.3536 | 0.1141 | 0.2694 | 0.0944 | 0.4383 |
| PCHAS_061420 | -0.398 | -0.052 | 0.4201 | 0.2352 | 0.2305 | 0.1444 | 0.5533 | 0.4096 | 0.1323 | -0.092 | 0.2605 | -0.114 |
| PCHAS_060070 | -0.036 | 0.3676 | 0.3937 | 0.4067 | 0.2321 | 0.0846 | -0.457 | -0.257 | -0.015 | -0.758 | -1.449 | -0.563 |
| PCHAS_101230 | -0.177 | 0.1227 | 0.0412 | 0.0384 | -0.001 | 0.2662 | -0.12  | 0.0884 | 0.1007 | 0.5037 | -0.197 | 0.3654 |
| PCHAS_071540 | 0.5347 | 0.0603 | -0.01  | -0.173 | -0.205 | -0.156 | 0.1048 | 0.1995 | -0.309 | 0.2574 | 0.5522 | 0.3263 |
| PCHAS_081580 | 0.1921 | -0.242 | -0.011 | 0.5667 | 0.0114 | 0.3978 | 0.353  | 0.2425 | 0.4623 | -0.248 | -0.388 | 0.6013 |
| PCHAS_103220 | 0.0106 | -0.219 | 0.0883 | -0.265 | -0.094 | 0.0733 | 0.2078 | 0.5155 | -0.087 | 0.2283 | 0.6179 | -0.084 |
| PCHAS_131230 | -0.16  | -0.168 | 0.5849 | 0.5171 | 0.1205 | -0.246 | 0.1365 | -0.21  | -0.289 | -1.451 | -1.076 | -0.801 |
| PCHAS_133270 | -0.239 | -0.112 | -0.244 | -0.194 | -0.303 | 0.0617 | 0.0842 | -0.014 | 0.0341 | 0.061  | 0.0383 | 0.0558 |
| PCHAS_093720 | -1.215 | -1.042 | -1.116 | -1.05  | -0.306 | 0.3855 | 0.6734 | 0.9638 | 0.3405 | 0.6806 | 0.1482 | 0.571  |
| PCHAS_091580 | 0.1911 | 0.389  | 0.3028 | 0.211  | 0.2437 | 0.0242 | 0.2486 | -0.08  | 0.0411 | -0.581 | -0.195 | -0.195 |
| PCHAS_090630 | -0.242 | 0.0819 | 0.1371 | 0.3001 | -0.527 | 0.5741 | 0.025  | -0.189 | 0.5677 | -0.098 | -0.08  | 0.2476 |
| PCHAS_122230 | -0.649 | 0.1245 | 0.0642 | 0.3728 | 0.1904 | 0.3445 | 0.0824 | 0.2553 | 0.1678 | -0.097 | -0.119 | -0.259 |
| PCHAS_133300 | -1.097 | -0.857 | -0.413 | -0.244 | 0.0438 | 0.165  | 0.6316 | 0.6032 | 0.4244 | 0.5027 | 0.2948 | 0.376  |
| PCHAS_041270 | #####  | 0.2925 | 0.3504 | 0.1974 | 0.2121 | 0.2237 | 0.3397 | 0.339  | 0.0811 | 0.1583 | 0.3228 | 0.1467 |
| PCHAS_040510 | -0.23  | 0.4847 | 0.4744 | 0.2523 | 0.0344 | -0.112 | -0.335 | -0.357 | #####  | -0.526 | -0.333 | -0.559 |
| PCHAS_136270 | -0.633 | -0.45  | 0.0892 | -0.072 | 0.2989 | 0.0251 | 0.6943 | 0.2767 | 0.1346 | -0.36  | 0.1155 | -0.421 |
| PCHAS_121060 | 0.86   | 0.2558 | 0.5026 | 0.2605 | 0.1941 | 0.2061 | 0.8108 | 0.2491 | 0.2963 | -0.14  | 0.7593 | 0.0316 |
| PCHAS_134010 | 0.0589 | -0.053 | 0.1771 | -0.244 | 0.1831 | -0.489 | 0.087  | -0.177 | -0.374 | 0.2315 | 0.5577 | 0.1812 |
| PCHAS_081260 | -1.374 | -1.825 | -1.552 | -1.543 | -0.674 | 0.0235 | 0.12   | 0.8927 | 0.1745 | 1.215  | 0.6555 | 0.7848 |
| PCHAS_021180 | 0.5829 | 0.5201 | 0.4177 | 0.2727 | -0.123 | -0.471 | -0.589 | -0.959 | -0.568 | -1.568 | -0.76  | -0.986 |
| PCHAS_072700 | -0.304 | -0.159 | -0.077 | -0.476 | 0.1774 | -0.303 | 0.8874 | 0.2636 | -0.21  | -0.011 | 0.0368 | -0.035 |
| PCHAS_132660 | 0.2768 | 0.3853 | 0.4676 | 0.4272 | -0.101 | 0.1606 | 1.0214 | 0.5733 | 0.0862 | -0.684 | 0.3127 | -0.396 |
| PCHAS_051390 | -0.993 | -0.14  | -0.044 | 0.0777 | 0.0948 | -0.14  | 0.8892 | -0.189 | -0.111 | -0.412 | -0.214 | 0.0825 |
| PCHAS_111640 | -0.746 | -0.75  | -0.262 | -0.668 | -0.171 | 0.7138 | 0.6009 | 0.6615 | 0.503  | 1.0413 | 1.3705 | 0.7733 |
| PCHAS_082380 | 0.2044 | 0.1759 | 0.4236 | 0.33   | 0.4035 | -0.01  | 0.1204 | 0.0128 | 0.0743 | -0.599 | -0.359 | -0.544 |
| PCHAS_122070 | -0.923 | -0.949 | -0.487 | -0.002 | 0.1058 | 0.4226 | 1.3356 | 0.4718 | 0.2132 | -0.055 | 1.0971 | 0.175  |
| PCHAS_140670 | -0.202 | -0.171 | 0.6941 | 0.3878 | 0.2521 | -0.161 | 0.5088 | -0.078 | -0.281 | -1.45  | -0.546 | -0.899 |
| PCHAS_112370 | 0.2536 | 0.0076 | 0.0929 | 0.3463 | 0.2197 | -0.013 | 0.6455 | 0.5122 | 0.1746 | 0.8268 | -0.136 | 0.8948 |

|              |        |        |        |        |        |        |        |        |        |        |        |        |
|--------------|--------|--------|--------|--------|--------|--------|--------|--------|--------|--------|--------|--------|
| PCHAS_122310 | 0.378  | -0.325 | -0.5   | -0.501 | -0.499 | -0.126 | -0.518 | -0.314 | -0.326 | 1.6726 | 2.2819 | 1.7237 |
| PCHAS_100330 | -0.296 | -0.858 | -0.647 | -0.974 | -0.288 | 0.2014 | 0.1905 | 0.0838 | -0.104 | 1.3411 | 1.2628 | 1.3328 |
| PCHAS_122280 | -0.332 | -0.333 | -0.496 | -0.605 | -0.288 | 0.3641 | -0.076 | 0.2063 | 0.3008 | 0.8003 | 0.163  | 0.4506 |
| PCHAS_041130 | -0.783 | -2.06  | -1.365 | -2.23  | -0.405 | 0.3246 | 0.4297 | 0.411  | 0.4507 | 1.3796 | 0.9235 | 1.2496 |
| PCHAS_124320 | -0.459 | -0.106 | 0.3911 | 0.5605 | 0.1327 | -0.028 | -0.056 | -0.256 | -0.009 | -0.993 | -0.627 | -0.469 |
| PCHAS_134320 | -0.233 | 0.1542 | 0.4229 | 0.6815 | -0.031 | -0.076 | -0.023 | -0.111 | -0.005 | -0.763 | -0.527 | -0.628 |
| PCHAS_123210 | 0.5587 | 0.3439 | 0.5242 | 0.2141 | 0.2358 | -0.048 | 0.4608 | -0.251 | 0.0541 | -0.12  | -0.908 | 0.0313 |
| PCHAS_082240 | 0.7402 | 0.4218 | 0.3137 | 0.2249 | -0.168 | -0.426 | -0.702 | -0.459 | -0.311 | -0.471 | -0.582 | -0.575 |
| PCHAS_121760 | 0.0093 | -0.114 | 0.0166 | -0.198 | -0.085 | -0.273 | 0.3959 | -0.053 | -0.265 | -0.994 | -0.418 | -0.806 |
| PCHAS_091480 | -0.042 | 0.1324 | 0.1986 | -0.285 | -0.129 | -0.587 | 0.2308 | 0.3262 | -0.529 | 0.6107 | 0.5792 | 0.6074 |
| PCHAS_081080 | 0.3166 | 0.1092 | -0.019 | -0.146 | 0.3818 | -0.331 | 0.1823 | -0.211 | -0.439 | -0.626 | -0.106 | -0.649 |
| PCHAS_093610 | 0.8114 | -0.04  | -0.214 | -0.176 | -0.331 | -0.33  | 0.3006 | -0.311 | -0.072 | 1.7324 | 2.2975 | 1.8051 |
| PCHAS_081910 | -0.044 | 0.0229 | -0.065 | 0.4917 | 0.2529 | 0.3259 | 0.1841 | 0.11   | 0.179  | 0.0351 | -0.815 | -0.263 |
| PCHAS_051510 | -1.125 | -0.427 | -0.483 | -0.007 | 0.3108 | 0.5528 | 0.22   | 0.7553 | 0.3908 | 0.8515 | 0.5675 | 0.8674 |
| PCHAS_090100 | -0.653 | 0.1509 | -0.118 | 0.1906 | 0.0539 | -0.316 | 0.3196 | -0.111 | -0.186 | -0.9   | -0.521 | -0.652 |
| PCHAS_141900 | 0.2425 | 0.2852 | 0.1505 | 0.8843 | 0.3343 | -0.055 | -0.522 | -0.841 | -0.224 | -0.716 | -0.432 | 0.2118 |
| PCHAS_070310 | 0.2385 | -0.249 | -0.067 | 0.0374 | 0.0447 | 0.2849 | 0.2952 | 0.2618 | 0.1467 | 0.0982 | 0.9148 | 0.3241 |
| PCHAS_091470 | 0.7862 | 0.4292 | 0.4155 | 0.1275 | -0.079 | -0.09  | 0.5298 | -0.47  | -0.336 | -0.779 | -0.088 | -0.547 |
| PCHAS_021130 | -1.132 | -0.429 | -0.332 | 0.0381 | 0.1367 | 0.4702 | 0.5813 | 0.537  | 0.4343 | 0.1433 | -0.044 | 0.1952 |
| PCHAS_111840 | 0.1232 | 0.0361 | 0.0687 | -0.277 | -0.003 | 0.3321 | 0.4958 | 0.5511 | 0.2629 | 0.3666 | -0.433 | 0.457  |
| PCHAS_135620 | -0.086 | -0.641 | 1.1463 | -0.179 | 0.0198 | 0.197  | 0.6034 | -0.084 | -0.106 | -0.896 | -0.15  | -0.459 |
| PCHAS_103940 | 0.3704 | -0.389 | 0.7406 | -0.195 | 0.1369 | -0.56  | 0.7651 | 0.0727 | -0.492 | -0.704 | 0.4977 | -0.385 |
| PCHAS_010700 | -0.27  | 0.2551 | 0.246  | 0.401  | 0.0037 | 0.2092 | -0.217 | -0.614 | -0.322 | -0.634 | -0.507 | -0.442 |
| PCHAS_071700 | 0.8613 | -0.502 | -0.557 | -1.669 | -0.428 | 0.0083 | 0.0743 | -1.056 | -0.007 | 1.0045 | 1.7214 | 1.44   |
| PCHAS_011010 | -1.528 | -0.428 | -0.212 | 0.1557 | 0.1587 | 0.0615 | -0.135 | 0.2979 | 0.0921 | -0.101 | -0.192 | -0.432 |
| PCHAS_082200 | -0.172 | 0.4523 | 0.4889 | 0.3921 | 0.2077 | 0.0561 | 0.1313 | -0.532 | 0.0199 | -1.304 | -0.315 | -0.805 |
| PCHAS_123660 | -0.133 | -0.031 | 0.181  | 0.2912 | -0.014 | 0.2486 | 0.1368 | -0.096 | 0.181  | -0.306 | -0.529 | 0.1162 |
| PCHAS_070280 | -0.258 | 0.7801 | 0.7191 | 0.2948 | 0.1207 | -0.298 | -0.324 | -0.316 | -0.185 | -0.833 | -0.939 | -0.28  |
| PCHAS_142540 | 0.21   | 0.1816 | 0.3283 | 0.8823 | 0.3552 | 0.0751 | 0.1323 | -0.069 | -0.018 | -0.329 | -0.15  | -0.324 |
| PCHAS_133220 | 1.0703 | 0.4715 | 0.9378 | -0.006 | -0.038 | -0.245 | 0.472  | -0.332 | -0.036 | -1.152 | 0.0925 | -0.614 |
| PCHAS_103190 | -0.474 | -0.235 | -0.173 | 0.4124 | 0.2988 | 0.2668 | -0.038 | 0.3643 | 0.4021 | -0.397 | -1.132 | -0.371 |
| PCHAS_120800 | 0.0187 | 0.2134 | 0.2458 | -0.254 | -0.311 | -0.45  | 0.4069 | -0.352 | -0.575 | -0.718 | -0.225 | -0.662 |
| PCHAS_144850 | -0.11  | 0.5013 | 0.3968 | 0.2488 | 0.1954 | 0.1561 | -0.232 | 0.0102 | 0.1793 | -0.47  | -0.542 | -0.637 |
| PCHAS_080930 | -1.239 | -0.235 | 0.0088 | -0.013 | 0.2642 | 0.2735 | 0.4341 | 0.1549 | 0.4155 | -0.5   | -0.593 | -0.588 |
| PCHAS_130580 | -1.088 | -1.339 | -0.753 | -0.866 | -0.221 | 0.0976 | 0.7371 | 0.9354 | 0.1951 | 0.4276 | 0.4775 | 0.3269 |
| PCHAS_072110 | 0.6557 | 0.3744 | 0.2429 | -0.057 | -0.21  | -0.544 | 0.1445 | 0.1675 | -0.147 | -0.296 | 0.6221 | -0.239 |
| PCHAS_102970 | -0.165 | 0.0688 | 0.2272 | -0.021 | -0.048 | -0.032 | 0.0797 | 0.2918 | -0.075 | -0.167 | 0.2427 | -0.168 |
| PCHAS_146330 | 0.5766 | 0.1192 | 0.3492 | -0.022 | -0.137 | -0.168 | -0.772 | -0.77  | -0.57  | -0.811 | -0.034 | -0.332 |
| PCHAS_102330 | 0.3389 | 0.9963 | 0.8932 | 0.7666 | -0.148 | 0.0378 | -0.062 | -0.178 | 0.1286 | 0.1371 | -0.055 | -0.164 |
| PCHAS_030230 | -0.51  | -0.47  | -0.36  | -0.003 | 0.0133 | 0.5128 | 0.9514 | 1.1894 | 0.3078 | 1.4306 | 0.5649 | 1.187  |
| PCHAS_113080 | -0.399 | 0.0778 | 0.1702 | 0.4807 | 0.1399 | 0.6678 | 0.3147 | 0.1904 | 0.4107 | -0.099 | -0.546 | 0.2758 |
| PCHAS_122050 | 0.0021 | 0.306  | 0.1885 | 0.2207 | 0.1498 | 0.0413 | -0.079 | -0.107 | -0.143 | -0.346 | -2.051 | -0.261 |
| PCHAS_146160 | -2.14  | -2.582 | -2.683 | -1.782 | -0.446 | 0.5296 | 0.7541 | 0.6842 | 0.5502 | 0.5638 | 0.3294 | 0.3169 |
| PCHAS_041860 | -1.42  | -1.375 | -1.147 | -0.527 | -0.272 | 0.3319 | 0.8299 | 0.8575 | 0.4075 | 0.6784 | 0.6411 | 0.6996 |
| PCHAS_000200 | 0.3394 | -1.071 | -0.379 | -1.75  | -0.144 | -0.031 | 0.3788 | 0.7726 | -0.142 | 1.2766 | 1.5551 | 0.4845 |
| PCHAS_091490 | 0.2268 | -0.649 | -0.751 | -0.564 | -0.308 | 0.1692 | -0.508 | -0.523 | -0.065 | 1.8219 | 1.7435 | 1.3673 |
| PCHAS_101700 | 0.1736 | -0.261 | 0.2903 | 0.5936 | 0.413  | 0.3579 | 0.0722 | -0.016 | 0.1989 | -1.496 | -1.662 | -0.841 |
| PCHAS_112220 | 0.6209 | 0.1417 | -0.352 | 0.4264 | -0.667 | 0.0592 | -1.041 | -0.666 | -0.021 | -1.005 | -0.752 | -0.141 |
| PCHAS_100580 | 0.7974 | 0.1397 | 0.4482 | 0.1752 | 0.2059 | -0.449 | 0.3557 | -0.265 | -0.434 | -0.862 | 0.2082 | -0.327 |
| PCHAS_100840 | 0.6462 | -0.189 | 0.692  | -0.157 | -0.132 | -0.533 | -1.126 | -0.727 | -0.811 | -0.513 | -0.388 | -0.298 |

|              |        |        |        |        |        |        |        |        |        |        |        |        |
|--------------|--------|--------|--------|--------|--------|--------|--------|--------|--------|--------|--------|--------|
| PCHAS_110540 | 0.5703 | 0.0394 | 0.5958 | -0.052 | 0.1028 | -0.153 | 0.0331 | -0.215 | -0.257 | -0.613 | 0.2204 | -0.516 |
| PCHAS_145980 | 0.5346 | 0.3473 | 0.2861 | 0.5316 | 0.275  | 0.083  | -0.022 | -0.184 | 0.2585 | -0.679 | -0.351 | -0.43  |
| PCHAS_136060 | 0.6113 | 0.6079 | 0.4977 | 0.193  | -0.042 | -0.16  | -0.489 | -0.513 | -0.382 | -0.939 | -1.396 | -0.709 |
| PCHAS_061760 | 0.3398 | 0.0107 | 0.3516 | -0.07  | -9E-04 | -0.223 | -0.112 | -0.363 | -0.209 | -0.194 | 1.8312 | 0.0262 |
| PCHAS_114400 | -0.338 | -0.087 | 0.4887 | 0.3882 | 0.2703 | -0.053 | 0.3362 | 0.2654 | -0.113 | -0.382 | -0.398 | -0.21  |
| PCHAS_110980 | -0.382 | -0.829 | -0.823 | -0.679 | -0.086 | 0.43   | 0.3345 | 0.5498 | 0.437  | 1.5938 | 0.2299 | 1.1893 |
| PCHAS_121400 | -0.278 | -0.071 | 0.2209 | 0.203  | 0.1387 | 0.4598 | -0.083 | 0.2364 | 0.4638 | 0.3327 | -0.429 | 0.206  |
| PCHAS_136180 | 0.1553 | 0.4238 | 0.1706 | 0.669  | 0.189  | -0.324 | -1.178 | -0.718 | -0.204 | -1.192 | -1.684 | -1.078 |
| PCHAS_141710 | 0.7485 | 0.2462 | -0.089 | -0.2   | 0.1969 | -0.348 | 0.2017 | 0.4557 | -0.165 | -0.228 | -0.284 | 0.0507 |
| PCHAS_120040 | 0.44   | 0.4684 | 0.1221 | 0.3834 | 0.2253 | 0.2864 | -0.04  | -0.178 | 0.209  | -1.378 | -0.465 | -0.612 |
| PCHAS_124140 | 0.3454 | 0.4745 | 0.573  | 0.2831 | 0.0381 | -0.438 | -0.299 | -0.616 | -0.451 | -1.747 | -0.673 | -0.733 |
| PCHAS_083250 | -0.627 | -0.401 | -0.123 | 0.1607 | 0.3212 | 0.3848 | 0.4081 | 0.3489 | 0.2751 | -0.465 | -0.76  | -0.394 |
| PCHAS_111680 | -0.414 | 0.3269 | 0.3501 | 0.2957 | 0.1134 | -0.052 | 0.4765 | -0.324 | -0.255 | -1.026 | -1.717 | -0.441 |
| PCHAS_111090 | -0.216 | 0.6478 | 0.0452 | -0.036 | 0.3868 | -0.097 | -0.335 | -0.448 | -0.346 | -0.3   | 0.1655 | -0.339 |
| PCHAS_122620 | 0.3417 | 0.549  | -0.147 | -0.287 | 0.2475 | -0.713 | -0.063 | -0.165 | -0.683 | -0.426 | 0.2092 | -0.215 |
| PCHAS_133820 | -0.675 | -0.89  | 0.1402 | -0.214 | 0.016  | -0.012 | 0.6694 | 0.1683 | 0.0753 | 0.466  | 1.1169 | 0.1679 |
| PCHAS_080700 | 0.1908 | -0.128 | -0.279 | 0.3428 | -0.021 | 0.2445 | -0.124 | 0.2376 | 0.2959 | 0.358  | 0.0622 | 0.239  |
| PCHAS_081370 | 0.3248 | -0.24  | 0.1164 | -0.433 | 0.02   | -0.392 | 0.6018 | 0.2937 | -0.52  | 0.7193 | -0.158 | 0.0454 |
| PCHAS_090010 | -0.645 | 0.0606 | 0.0693 | 0.7584 | 0.7418 | 0.4013 | -0.086 | 0.0888 | 0.3806 | -0.255 | -1.002 | 0.1012 |
| PCHAS_110550 | 1.1107 | -0.223 | 0.435  | 0.0618 | -0.021 | -0.376 | -0.159 | -0.332 | -0.363 | -0.683 | 0.9939 | -0.541 |
| PCHAS_040830 | 0.3855 | -1.227 | -0.506 | -0.796 | -0.077 | 0.5091 | 0.7846 | 0.6189 | 0.3769 | 1.3462 | 0.4981 | 1.1863 |
| PCHAS_136660 | 0.3755 | 0.3223 | 0.4448 | 0.2676 | 0.0901 | -0.386 | -0.207 | -1.015 | -0.305 | -1.744 | -1.022 | -1.119 |
| PCHAS_051940 | -0.496 | -0.087 | -0.736 | -0.878 | -0.534 | 0.3351 | -0.136 | -1.001 | 0.0851 | 0.464  | 1.0947 | 0.8461 |
| PCHAS_144870 | -0.788 | 0.0204 | 0.1276 | 1.9823 | 0.3251 | 0.1378 | -0.648 | -0.464 | 0.2863 | -1.203 | -1.906 | -1.285 |
| PCHAS_134300 | -0.273 | 0.0149 | 0.4543 | 0.2854 | 0.1416 | -0.117 | -0.302 | 0.007  | 0.07   | -0.551 | -0.27  | -0.506 |
| PCHAS_010600 | 0.8468 | 0.3679 | 0.3    | 0.1398 | 0.0547 | 0.1375 | -0.258 | -0.213 | -0.01  | -0.356 | 0.9891 | -0.06  |
| PCHAS_142500 | 0.361  | 0.8606 | 0.2152 | 0.1979 | -0.078 | -0.261 | -0.112 | -0.661 | -0.396 | -0.255 | -0.101 | -0.298 |
| PCHAS_103470 | -0.024 | 0.1883 | 0.2954 | 0.4154 | 0.1001 | 0.0645 | -0.141 | 0.185  | -0.014 | -0.634 | -0.411 | -0.363 |
| PCHAS_121090 | -0.01  | 0.4432 | 0.6314 | 0.7451 | 0.3223 | -0.299 | -0.626 | -0.56  | -0.134 | -1.217 | -2.384 | -1.049 |
| PCHAS_060770 | 0.3967 | 0.2023 | 0.5317 | 0.3048 | 0.1434 | -0.387 | -0.152 | -0.348 | -0.223 | -0.737 | -0.782 | -0.554 |
| PCHAS_140990 | 0.7983 | 0.4348 | 0.3268 | 0.164  | -0.019 | -0.504 | -0.136 | -0.68  | -0.487 | -0.821 | -0.196 | -0.607 |
| PCHAS_111660 | -0.563 | -0.699 | -0.481 | -1.077 | -0.06  | 0.2498 | 0.1922 | 0.0543 | 0.1928 | 0.3664 | 0.3391 | 0.1968 |
| PCHAS_072040 | 0.5334 | 0.3166 | 0.7307 | 0.2307 | 0.291  | 0.1365 | 0.5829 | -0.173 | -0.011 | -0.993 | -0.013 | -0.175 |
| PCHAS_142010 | 0.1712 | 0.0386 | -0.073 | 0.1308 | 0.042  | -0.255 | 0.0793 | -0.039 | -0.137 | -0.237 | -0.28  | -0.173 |
| PCHAS_120530 | 0.6608 | 0.393  | 0.6013 | 0.0637 | 0.0092 | -0.799 | 0.3948 | -0.361 | -0.694 | -0.773 | -1.309 | -0.758 |
| PCHAS_081200 | -0.379 | 0.8636 | 0.8507 | -0.275 | -0.049 | -0.199 | -0.298 | -0.12  | -0.019 | 0.947  | 0.9404 | 0.2158 |
| PCHAS_030970 | 0.1013 | 0.5779 | -0.065 | -0.157 | -0.029 | 0.0455 | -0.136 | -0.635 | -0.099 | 0.1643 | 0.1737 | 0.2622 |
| PCHAS_061750 | -0.372 | -0.619 | -0.532 | 0.078  | 0.1592 | 0.188  | 0.0235 | 0.2674 | 0.0485 | 0.6965 | -0.175 | 0.2638 |
| PCHAS_121920 | -0.397 | 0.0512 | 0.363  | 0.1553 | 0.1651 | -0.119 | 0.3224 | 0.1086 | -0.202 | -0.524 | -0.176 | -0.566 |
| PCHAS_081630 | 0.451  | -0.495 | -0.03  | -0.152 | -0.149 | -0.194 | 0.5537 | 0.6796 | 0.0536 | 0.7226 | 0.8908 | 0.5406 |
| PCHAS_061680 | 0.5233 | 0.7178 | 0.6451 | 0.304  | -0.053 | -0.422 | -0.138 | -0.654 | -0.415 | -0.933 | 0.0518 | -0.395 |
| PCHAS_070190 | -0.915 | -0.751 | -0.702 | 0.1308 | -0.106 | 0.4933 | -0.399 | 1.0883 | 0.777  | 0.9553 | 0.7185 | 0.7602 |
| PCHAS_136100 | 0.3141 | 0.6023 | 0.3446 | 0.7115 | 0.2443 | 0.0918 | -0.041 | -0.184 | 0.0646 | -0.826 | -1.185 | -0.667 |
| PCHAS_136890 | -1.414 | -0.845 | -0.916 | -0.325 | -0.537 | 0.5904 | 0.8858 | 0.6318 | 0.4477 | -0.317 | -0.333 | -0.59  |
| PCHAS_062130 | -0.808 | -0.408 | -0.711 | 0.1925 | 0.093  | -0.057 | 0.349  | -0.177 | -0.051 | -0.133 | -0.103 | 0.5834 |
| PCHAS_112430 | -0.122 | 0.6813 | 0.5256 | 0.221  | -0.033 | -0.188 | -0.625 | -0.336 | -0.406 | -0.33  | -0.287 | -0.533 |
| PCHAS_041420 | -0.463 | 0.9854 | 0.2106 | 0.0949 | 0.16   | -0.074 | 0.2693 | 0.0309 | -0.227 | -0.736 | -0.349 | -0.455 |
| PCHAS_133500 | -0.326 | 0.0126 | 0.2951 | 0.3558 | 0.1336 | 0.0067 | 0.474  | 0.2659 | 0.0906 | -1.052 | -0.795 | -0.643 |
| PCHAS_100440 | -0.29  | 0.6183 | 0.786  | 0.0196 | -0.02  | 0.4192 | -0.29  | -0.184 | 0.1308 | -0.435 | -0.015 | -0.44  |
| PCHAS_111880 | -0.978 | -0.581 | -0.46  | -0.367 | 0.1402 | 0.5532 | 0.7845 | 0.8328 | 0.2767 | 0.9485 | 0.7346 | 0.76   |

|              |        |        |        |        |        |        |        |        |        |        |        |        |
|--------------|--------|--------|--------|--------|--------|--------|--------|--------|--------|--------|--------|--------|
| PCHAS_103750 | -0.408 | -0.166 | 0.0366 | 0.1872 | 0.0884 | 0.2412 | -0.112 | -0.127 | 0.0573 | -0.227 | -0.002 | -0.081 |
| PCHAS_010370 | -0.446 | -0.129 | 0.6737 | -0.066 | 0.4691 | -0.09  | 1.1574 | 0.2776 | 0.0941 | -0.758 | 0.3525 | -0.327 |
| PCHAS_143750 | -0.34  | -0.518 | -0.451 | -0.297 | -0.113 | 0.2572 | -0.156 | 0.2481 | 0.2231 | 0.8417 | 0.4587 | 0.5256 |
| PCHAS_112550 | 0.4142 | -0.003 | -0.545 | 0.2352 | -0.139 | 0.3287 | 0.543  | 0.0934 | 0.363  | 0.4961 | 0.3208 | -0.045 |
| PCHAS_140730 | 0.0699 | 0.0546 | 0.3242 | 0.137  | 0.1706 | -0.2   | -0.128 | 0.0366 | -0.082 | -0.504 | -0.384 | -0.561 |
| PCHAS_122910 | 0.2497 | 0.8363 | 0.5279 | -0.072 | -0.238 | -0.622 | -0.751 | -0.901 | -0.716 | -1.101 | -0.449 | -0.542 |
| PCHAS_104110 | -0.02  | 0.0889 | 0.2361 | 0.2394 | 0.0689 | -0.064 | -0.382 | -0.192 | -0.044 | -0.392 | -0.984 | -0.347 |
| PCHAS_082670 | -0.056 | -0.074 | 0.1808 | -0.367 | 0.0291 | -0.276 | 0.6687 | 0.8164 | -0.155 | 0.2157 | 0.4413 | -0.008 |
| PCHAS_135100 | 0.5463 | -0.198 | -0.622 | -0.516 | -0.143 | 0.3132 | 0.0487 | 0.0389 | 0.0764 | 0.0996 | 1.1043 | 0.4646 |
| PCHAS_133260 | 1.2637 | -0.234 | -0.273 | -0.178 | -0.151 | 0.1042 | -0.188 | 0.215  | -0.051 | 0.6292 | 1.5481 | 0.9682 |
| PCHAS_091320 | -1.065 | 0.1686 | 0.0015 | 0.0071 | 0.4197 | 0.0415 | -0.027 | 0.6295 | 0.3214 | 0.7031 | 0.6905 | 0.3253 |
| PCHAS_114450 | -0.736 | -0.024 | 0.6817 | -0.185 | 0.0471 | -0.319 | -0.037 | 0.2013 | -0.145 | -0.735 | -1.673 | -0.666 |
| PCHAS_136550 | -0.557 | -0.968 | 0.0536 | -0.603 | 0.0082 | -0.093 | 0.8647 | -0.223 | -0.154 | 0.3131 | 0.6487 | 0.2065 |
| PCHAS_132930 | -0.32  | -0.159 | -0.265 | -0.232 | -0.167 | -0.06  | -0.104 | -0.313 | 0.0359 | 0.3149 | -0.147 | 0.2298 |
| PCHAS_093190 | 0.8223 | -0.2   | -0.539 | -0.01  | -0.559 | 0.3536 | 1.1583 | -0.268 | 0.3042 | 0.8932 | 0.2953 | 0.2899 |
| PCHAS_050270 | -0.315 | -0.027 | -0.419 | 0.3315 | 0.0167 | 0.1409 | 0.2996 | -0.093 | 0.1657 | 0.0061 | -0.537 | 0.263  |
| PCHAS_140830 | -0.179 | -0.644 | -0.573 | -0.44  | -0.129 | -0.238 | -0.32  | -0.128 | -0.151 | 1.1712 | 0.8422 | 0.6848 |
| PCHAS_021160 | 0.1339 | -0.53  | -0.902 | -0.008 | -0.062 | 0.8559 | -0.132 | 0.6708 | 0.8613 | 1.0455 | -0.118 | 1.0788 |
| PCHAS_140980 | 0.444  | 0.4826 | 0.2408 | 0.136  | -0.193 | -0.387 | -0.698 | -0.494 | -0.38  | -0.476 | -0.933 | -0.611 |
| PCHAS_141310 | -0.169 | 0.1768 | 0.113  | 0.4782 | 0.4167 | 0.4897 | -1.388 | -0.544 | 0.3526 | -0.088 | -0.679 | 0.0674 |
| PCHAS_134530 | -0.997 | -0.928 | -0.298 | -1.141 | -0.193 | -0.199 | 0.0331 | 0.5562 | -0.111 | 1.6575 | 1.665  | 0.9396 |
| PCHAS_134370 | 0.692  | 0.2942 | 0.0749 | 0.0257 | -0.113 | -0.333 | 0.0974 | 0.3575 | -0.245 | 0.0944 | 0.8437 | 0.1364 |
| PCHAS_140410 | -0.579 | 0.2868 | 0.0119 | 0.4541 | 0.0807 | -0.036 | -0.445 | -0.146 | 0.0681 | -0.313 | -0.804 | -0.003 |
| PCHAS_071090 | 0.7217 | 0.6285 | 0.2151 | 0.0958 | -0.179 | -0.472 | -1.374 | -1.016 | -0.555 | -1.606 | -1.501 | -1.148 |
| PCHAS_145330 | -0.684 | -0.556 | -0.283 | 0.033  | 0.0776 | -0.033 | 0.1838 | 0.6247 | -0.073 | 0.5354 | 0.2587 | 0.101  |
| PCHAS_144600 | 0.0888 | 1.042  | 0.4863 | 0.3069 | 0.0057 | 0.0799 | 0.1364 | -0.608 | 0.2206 | 0.0345 | 0.0336 | -0.567 |
| PCHAS_146480 | 0.6859 | 0.2258 | 0.5805 | -0.142 | -0.083 | -0.212 | 0.2719 | 0.2039 | -0.083 | -0.223 | 1.048  | -0.335 |
| PCHAS_030550 | -0.061 | -0.408 | -0.419 | 0.0966 | 0.1949 | 0.0869 | 0.8396 | 0.6428 | 0.0982 | 0.4273 | 0.0887 | 0.3732 |
| PCHAS_061890 | 0.152  | 0.3415 | 0.2367 | 0.2134 | 0.2592 | -0.129 | -0.897 | 0.2677 | 0.0827 | -0.177 | 0.076  | -0.262 |
| PCHAS_100950 | 0.0016 | -0.123 | 0.1424 | 0.1017 | 0.0286 | -0.096 | 0.0681 | 0.0483 | 0.0061 | 0.3735 | -0.019 | 0.2275 |
| PCHAS_040270 | 0.1356 | -0.076 | 0.157  | 0.2235 | 0.2517 | 0.0754 | 0.1098 | 0.1542 | 0.0412 | -0.349 | -0.461 | -0.506 |
| PCHAS_050400 | -0.858 | -0.677 | -0.626 | 0.0981 | 0.0417 | 0.8818 | 0.9501 | 0.9778 | 0.7882 | 0.8423 | -0.068 | 0.616  |
| PCHAS_140250 | -1.679 | -2.093 | -2.509 | -2.105 | -0.229 | 0.8475 | 1.0425 | 0.4122 | 0.822  | 0.6887 | 0.1463 | 0.6124 |
| PCHAS_112240 | -0.325 | 0.0869 | -0.156 | -0.247 | -0.153 | 0.0109 | 0.2688 | 0.1874 | 0.0192 | -0.005 | -0.251 | -0.303 |
| PCHAS_131700 | -0.153 | -0.577 | -0.121 | -0.388 | -0.263 | -0.357 | -0.168 | -0.114 | -0.577 | 0.6673 | 0.8584 | 0.9297 |
| PCHAS_040560 | -0.268 | 0.1489 | 0.6268 | 0.1873 | 0.3472 | 0.439  | 0.8775 | 0.2791 | 0.416  | -0.203 | 0.1511 | -0.216 |
| PCHAS_135470 | 1.5768 | -0.091 | 0.4472 | -0.2   | 0.026  | -0.52  | 1.5184 | -0.137 | -0.009 | -0.683 | -0.037 | -0.473 |
| PCHAS_103390 | -0.869 | -1.682 | -2.225 | -2.193 | -0.63  | 0.757  | 0.0731 | 0.2002 | -0.155 | 1.5444 | 1.6631 | 1.4478 |
| PCHAS_135450 | 0.8699 | 0.0759 | 0.4512 | 0.3263 | -0.02  | 0.3919 | 0.6286 | 0.6334 | 0.2761 | 0.0759 | 0.4564 | 0.0295 |
| PCHAS_091290 | -0.416 | -0.21  | 0.0709 | -0.027 | 0.0589 | -0.278 | 0.6091 | 0.5178 | -0.102 | 0.4534 | 0.4614 | 0.401  |
| PCHAS_134600 | 0.9046 | -0.074 | -0.091 | -0.173 | -1.061 | -0.598 | -0.351 | -0.051 | -0.532 | -0.711 | -0.599 | -0.46  |
| PCHAS_073110 | -0.071 | 0.3583 | -0.367 | -0.375 | -0.305 | 0.1861 | -0.878 | -0.201 | 0.102  | 0.3103 | 0.3671 | 0.6796 |
| PCHAS_132100 | -0.146 | -0.177 | -0.178 | -0.154 | 0.0611 | 0.4455 | -0.051 | 0.1351 | 0.215  | 0.3134 | -0.76  | 0.2056 |
| PCHAS_091840 | -9E-04 | -0.471 | 0.0064 | 0.154  | -0.151 | -0.61  | 0.0152 | 0.5116 | -0.526 | -0.375 | -0.673 | -0.244 |
| PCHAS_111730 | -0.206 | 0.1991 | 0.0685 | -0.238 | -0.053 | -0.456 | -0.073 | -0.134 | -0.459 | -0.644 | -0.047 | -0.188 |
| PCHAS_102660 | -0.2   | 0.2867 | 0.3169 | 0.4498 | 0.4654 | 0.1166 | 0.5362 | -0.133 | 0.1169 | -2.108 | -0.045 | -0.752 |
| PCHAS_050950 | -0.346 | 0.0154 | 0.4861 | 0.2041 | 0.2328 | -0.024 | 0.2273 | -0.155 | 0.1546 | -0.28  | 0.0611 | -0.225 |
| PCHAS_050630 | 0.3186 | 0.4573 | 0.5766 | -0.373 | -0.399 | -0.294 | -0.591 | -0.271 | -0.409 | -0.324 | -0.132 | -0.62  |
| PCHAS_136410 | -0.641 | -0.366 | -0.185 | 0.2295 | 0.0592 | 0.0437 | 0.3963 | 0.7197 | -0.023 | 0.1445 | 0.4472 | 0.1578 |
| PCHAS_060440 | -0.145 | -0.105 | -0.11  | -0.038 | -0.189 | -0.489 | -0.311 | 0.07   | -0.41  | 0.0501 | 0.1735 | -0.04  |

|              |        |        |        |        |        |        |        |        |        |        |        |        |
|--------------|--------|--------|--------|--------|--------|--------|--------|--------|--------|--------|--------|--------|
| PCHAS_110390 | -1.661 | -1.57  | -1.587 | -0.645 | -0.083 | 0.5029 | 0.9162 | 1.006  | 0.471  | 0.4924 | 0.3698 | 0.3305 |
| PCHAS_072470 | -0.903 | -0.718 | -0.392 | -0.21  | 0.1057 | 0.3753 | 0.6635 | 0.5956 | 0.3866 | 0.2559 | -0.218 | -0.071 |
| PCHAS_100360 | 0.8599 | 0.5046 | 0.276  | 0.1633 | -0.195 | -0.136 | 0.2372 | -0.368 | -0.134 | -0.18  | 0.3452 | 0.0819 |
| PCHAS_090410 | -0.361 | -0.003 | 0.0839 | 0.2069 | -0.304 | -0.294 | -0.369 | -0.031 | -0.285 | -1.154 | -0.085 | -0.92  |
| PCHAS_123110 | -0.033 | -0.122 | -0.576 | 0.3148 | -0.446 | 0.3949 | 0.0803 | 0.1047 | 0.1242 | -0.087 | 0.3503 | -0.263 |
| PCHAS_041790 | 0.6541 | 0.1221 | 0.3419 | -0.303 | -0.089 | -0.609 | -0.145 | -0.16  | -0.362 | -0.215 | 0.2072 | -0.089 |
| PCHAS_041510 | -0.316 | 0.3126 | 0.3591 | 0.5445 | 0.3048 | -0.025 | -0.069 | 0.0627 | 0.113  | -0.565 | -1.79  | -0.093 |
| PCHAS_060570 | -0.337 | -0.942 | -1.106 | -1.092 | -0.349 | -0.161 | 0.3744 | -0.169 | -0.007 | 2.0516 | 1.6444 | 1.7735 |
| PCHAS_082300 | 1.1073 | 0.3787 | 0.4513 | -0.124 | -0.194 | -0.188 | 0.6239 | -0.176 | -0.086 | -0.07  | 0.7157 | -0.086 |
| PCHAS_073030 | 1.3038 | 0.2099 | 0.2936 | -0.329 | -0.095 | -0.668 | 0.3103 | 0.0115 | -0.511 | 0.1493 | 1.5772 | 0.1482 |
| PCHAS_031390 | -0.626 | -0.634 | -0.571 | -0.321 | -0.026 | 0.4707 | 0.5642 | 0.384  | 0.5045 | -0.444 | -0.105 | -0.552 |
| PCHAS_081330 | -0.096 | -0.114 | 0.2334 | -0.309 | -0.116 | -0.224 | 0.219  | -0.225 | -0.285 | -0.145 | -0.136 | -0.322 |
| PCHAS_132810 | -1.6   | -0.739 | -0.352 | -0.138 | -0.322 | -0.114 | -0.04  | 0.7118 | 0.0782 | 0.3899 | 0.2603 | 0.3974 |
| PCHAS_041340 | 1.2972 | -0.355 | 0.0704 | -0.257 | 0.0421 | 0.5367 | 0.0699 | -0.128 | 0.7255 | 0.1541 | -0.681 | -0.039 |
| PCHAS_120270 | 0.621  | 0.0562 | -2.275 | 1.1862 | -1.27  | 1.3097 | 0.7713 | -0.398 | 1.0635 | 0.3019 | 1.2756 | 0.8716 |
| PCHAS_031160 | 0.9938 | -0.622 | -0.735 | -1.272 | -0.42  | -0.417 | -0.075 | -0.037 | -0.362 | 1.6893 | 2.6577 | 1.2841 |
| PCHAS_110190 | 0.8365 | 0.8074 | 0.5419 | 0.2854 | 0.1799 | -0.76  | -0.804 | -1.331 | -0.611 | -1.383 | -0.837 | -1.438 |
| PCHAS_052460 | -0.968 | -0.436 | -0.504 | -0.771 | -0.232 | -0.056 | 0.0981 | 0.673  | 0.5717 | 0.19   | 0.5607 | 0.0153 |
| PCHAS_030820 | 0.4157 | 0.1316 | 0.3355 | 0.1596 | 0.0963 | -0.28  | 0.7936 | 0.2106 | -0.139 | 0.0577 | 0.3922 | 0.3553 |
| PCHAS_133320 | -0.119 | 0.5018 | 0.2541 | 0.4293 | 0.1802 | 0.4427 | 0.3198 | 0.0773 | 0.2246 | -1.057 | -0.857 | -0.391 |
| PCHAS_062030 | -0.68  | -0.3   | 0.0403 | 0.0563 | -0.018 | 0.0678 | 0.1109 | 0.3605 | -0.04  | 0.1609 | -0.037 | -0.011 |
| PCHAS_070950 | 0.7105 | 0.1253 | 0.2294 | -0.111 | -0.1   | -0.246 | -0.394 | -0.002 | -0.275 | -0.315 | -0.419 | -0.542 |
| PCHAS_145010 | 0.2293 | 0.4285 | 0.2793 | 0.0797 | -0.12  | -0.477 | -0.142 | 0.189  | -0.381 | -0.241 | -0.03  | -0.402 |
| PCHAS_050380 | 0.0892 | -0.777 | -0.78  | -0.316 | -0.141 | -0.08  | -0.317 | -0.019 | -0.016 | 0.6068 | 0.8268 | 0.3381 |
| PCHAS_010740 | -0.632 | -0.126 | 0.4798 | 0.1925 | 0.0851 | -0.137 | 0.2823 | 0.1806 | -0.414 | -0.419 | -0.225 | -0.338 |
| PCHAS_072420 | -1.089 | -0.155 | -0.464 | -0.155 | -0.249 | 0.0185 | 0.3752 | 0.8477 | 0.0905 | 0.4447 | 0.3158 | 0.403  |
| PCHAS_071800 | -0.192 | -0.107 | 0.3012 | 0.2351 | 0.2706 | -0.003 | 0.7072 | 0.5243 | 0.1155 | -0.154 | 0.451  | -0.168 |
| PCHAS_070700 | -0.904 | -0.592 | 0.0805 | -0.18  | 0.066  | 0.1126 | 0.6934 | 0.4395 | 0.1174 | 0.0404 | 0.5141 | 0.036  |
| PCHAS_146380 | -0.987 | -0.375 | 0.1246 | 0.1422 | 0.1996 | 0.5749 | 0.962  | 0.248  | 0.1106 | 0.2227 | 0.1475 | 0.1238 |
| PCHAS_113960 | 0.5282 | 0.2979 | 0.1492 | 0.0633 | 0.0003 | -0.059 | -0.596 | -0.462 | -0.293 | -0.218 | -0.436 | -0.243 |
| PCHAS_100760 | 0.3608 | 0.4877 | -0.415 | 0.2743 | -0.47  | 0.8817 | 1.1015 | 0.531  | 0.6804 | 0.7824 | 0.1753 | 0.2404 |
| PCHAS_041780 | 0.018  | -0.288 | 0.2246 | -0.255 | -0.103 | -0.32  | 0.3697 | 0.2245 | -0.219 | -0.462 | 0.5375 | -0.527 |
| PCHAS_114200 | -0.165 | 0.077  | 0.1186 | -0.601 | -0.246 | -0.544 | 1.0279 | 0.3347 | -0.402 | 0.0833 | 0.3098 | 0.4014 |
| PCHAS_141530 | -0.216 | -0.005 | -0.171 | -0.31  | -0.139 | -0.235 | -0.638 | -0.252 | -0.224 | 0.0647 | 0.4194 | -0.006 |
| PCHAS_132120 | 0.6838 | -0.183 | 0.1613 | 0.1789 | 0.0738 | -0.312 | -0.247 | -0.622 | -0.286 | -2.099 | -1.146 | -1.099 |
| PCHAS_082460 | 0.7637 | 0.4201 | 0.2388 | 0.1545 | 0.0384 | -0.341 | -1.111 | -0.451 | -0.38  | -0.71  | -0.599 | -0.671 |
| PCHAS_101090 | -0.301 | -0.635 | 0.4964 | 0.2776 | 0.3263 | -0.321 | 0.3531 | -0.698 | -0.275 | -1.088 | -0.486 | -0.628 |
| PCHAS_010480 | -0.84  | 0.4568 | 0.8727 | 0.0393 | 0.2247 | -0.472 | -0.566 | 0.0893 | -0.605 | 0.3612 | -0.815 | 0.2457 |
| PCHAS_080470 | -0.449 | -0.111 | -0.089 | 0.2146 | 0.088  | 0.4637 | -0.115 | 0.2252 | 0.4538 | -0.033 | -0.96  | -0.223 |
| PCHAS_120710 | -0.921 | -1.347 | -1.136 | -0.724 | -0.185 | 0.2107 | 0.8347 | 0.9859 | 0.21   | 1.0413 | 0.8228 | 0.903  |
| PCHAS_092290 | 0.1464 | 0.0091 | 0.0627 | -0.084 | 0.0931 | -0.053 | 0.8036 | 0.331  | -3E-04 | -0.29  | 0.2768 | -0.39  |
| PCHAS_135870 | -0.387 | -1.276 | -1.419 | -1.409 | -0.298 | 0.0719 | -0.234 | 0.2691 | -0.066 | 1.7564 | 1.7018 | 1.1817 |
| PCHAS_140120 | 0.0164 | 0.7093 | 0.9076 | 0.3154 | -0.019 | 0.2214 | -0.394 | 0.3981 | 0.1455 | 0.1547 | 0.7899 | -0.45  |
| PCHAS_136200 | -0.084 | -0.36  | 0.4865 | 0.3042 | 0.4512 | -0.179 | 0.9815 | 0.1227 | -0.047 | -1.094 | 0.3362 | -0.93  |
| PCHAS_123490 | 0.2107 | 0.2171 | 0.0245 | 0.0214 | -0.178 | -0.076 | -0.022 | 0.219  | -0.095 | -0.142 | -0.424 | -0.466 |
| PCHAS_010760 | -0.48  | -0.719 | -0.573 | -0.282 | -0.085 | 0.3626 | -0.02  | 0.1306 | 0.2209 | 0.0879 | 0.449  | -0.14  |
| PCHAS_102400 | -0.301 | -0.093 | -0.203 | -0.103 | -0.125 | -0.149 | 0.0798 | 0.2985 | -0.126 | 0.1207 | 0.3791 | -0.053 |
| PCHAS_146340 | 0.4044 | -0.253 | 0.0697 | 0.0015 | -0.194 | -0.377 | 0.3615 | -0.296 | -0.179 | -0.627 | -0.127 | -0.436 |
| PCHAS_142240 | -0.487 | -0.762 | -0.313 | -1.861 | -0.399 | -0.107 | -0.017 | -0.053 | -0.125 | 1.06   | 1.248  | 1.2376 |
| PCHAS_101060 | -0.425 | -1.327 | -0.017 | -0.96  | 0.0879 | -0.249 | 0.8244 | 0.7158 | -0.401 | -0.196 | 0.6307 | -0.251 |

|              |        |        |        |        |        |        |        |        |        |        |        |        |
|--------------|--------|--------|--------|--------|--------|--------|--------|--------|--------|--------|--------|--------|
| PCHAS_031360 | -0.093 | -0.476 | -0.196 | -0.484 | -0.214 | -0.243 | -0.893 | -0.322 | -0.269 | 1.1295 | 3.0545 | 0.9182 |
| PCHAS_110590 | -0.017 | 0.6163 | 0.5783 | 0.5283 | -0.03  | -0.023 | -0.449 | -0.391 | -0.186 | -0.711 | -0.96  | -0.07  |
| PCHAS_121230 | -0.225 | -0.428 | -0.399 | -0.665 | -0.405 | -0.264 | -0.384 | 0.2424 | -0.274 | 1.079  | 1.221  | 1.0815 |
| PCHAS_051190 | -0.032 | -2.387 | -2.383 | -1.872 | -0.734 | 0.2516 | 0.001  | 0.5479 | 0.0061 | 1.797  | 1.2729 | 1.7478 |
| PCHAS_111190 | -0.56  | -0.278 | -0.213 | -0.34  | -0.074 | 0.1461 | 0.6242 | 0.6977 | 0.1216 | 0.5015 | 0.3652 | 0.4585 |
| PCHAS_111850 | -0.021 | 0.3473 | 0.2705 | 0.3491 | -0.009 | 0.3759 | 0.1647 | 0.1184 | 0.239  | 0.438  | 0.1027 | 0.3047 |
| PCHAS_090720 | -0.482 | 0.0383 | -0.209 | -0.242 | -0.05  | 0.34   | -0.204 | 0.0511 | 0.0267 | 0.2069 | 0.3663 | 0.368  |
| PCHAS_080990 | -0.039 | -0.419 | -0.5   | -0.291 | -0.126 | 0.6435 | 0.1691 | 0.6651 | 0.5158 | 1.8267 | 0.7529 | 1.4319 |
| PCHAS_136900 | 0.7971 | 0.0759 | -0.359 | -0.38  | -0.261 | 0.7162 | -0.423 | -0.615 | 0.2339 | 1.1448 | 1.7166 | 1.5882 |
| PCHAS_146650 | 0.2005 | 0.0344 | 0.2993 | 0.5021 | -0.051 | -0.195 | -0.59  | -0.921 | -0.167 | -1.169 | -0.726 | -1.087 |
| PCHAS_070600 | -0.11  | -0.058 | -0.257 | 0.9689 | 0.1584 | 0.0512 | 0.2205 | -0.079 | -0.133 | -1.001 | -0.103 | -0.898 |
| PCHAS_121300 | -0.713 | 0.1265 | -0.036 | 0.6038 | 0.4488 | 0.1547 | -0.099 | -0.178 | 0.2096 | -1.703 | -1.384 | -1.429 |
| PCHAS_134160 | 0.7227 | -0.165 | 0.2018 | -0.515 | -0.228 | -0.218 | -0.219 | -0.175 | -0.34  | 0.0222 | 0.3638 | -0.195 |
| PCHAS_062350 | 0.7895 | 0.0794 | 0.1114 | 0.2362 | 0.2034 | -0.039 | 0.0865 | 0.3302 | -0.02  | -0.861 | 0.1814 | -0.233 |
| PCHAS_140920 | 0.0375 | -0.44  | -0.99  | 0.2549 | -0.106 | 0.6642 | 0.075  | 0.9196 | 0.3713 | 1.1873 | 0.9622 | 1.086  |
| PCHAS_140470 | -0.375 | -0.286 | 0.142  | 0.2382 | 0.1018 | 0.0817 | 0.8002 | 0.3495 | 0.0398 | -0.364 | -0.124 | -0.435 |
| PCHAS_051150 | 0.7    | 0.3732 | 0.7031 | -0.074 | 0.1811 | 0.2575 | -0.69  | -0.545 | 0.0343 | 0.2234 | 0.4091 | 0.0886 |
| PCHAS_121310 | 0.4874 | -0.449 | -0.302 | -0.336 | -0.171 | 0.1757 | 0.8502 | -0.451 | -0.14  | 1.5449 | 2.1862 | 1.0016 |
| PCHAS_031780 | 0.4215 | 0.2928 | -0.007 | 0.0961 | -0.268 | -0.573 | 0.3838 | 0.4902 | -0.488 | 0.5549 | 0.9207 | 0.4231 |
| PCHAS_031430 | 0.5639 | -0.315 | -0.073 | -0.186 | -0.16  | -0.203 | 0.8838 | 0.7481 | -0.063 | 0.2984 | 0.2646 | 0.0854 |
| PCHAS_110930 | -0.154 | 0.2107 | 0.5393 | 0.3125 | 0.2427 | 0.169  | -0.092 | 0.1179 | 0.1826 | -0.647 | -0.051 | -0.054 |
| PCHAS_131050 | -0.966 | -0.575 | -0.289 | 0.0561 | 0.0746 | 0.368  | 0.555  | 0.4512 | 0.3369 | -0.113 | -0.397 | -0.162 |
| PCHAS_060480 | -0.093 | -0.051 | -0.215 | 0.4846 | 0.3638 | 0.4166 | -0.028 | 0.4882 | 0.2976 | -0.007 | -0.644 | 0.0504 |
| PCHAS_010620 | 0.209  | 0.2642 | -0.123 | 0.3134 | -0.263 | -0.423 | -1.298 | -0.972 | -0.442 | -1.864 | -1.941 | -1.573 |
| PCHAS_102730 | -0.15  | -0.457 | -0.444 | -0.68  | -0.117 | 0.2064 | 0.1059 | 0.2374 | 0.2266 | 0.9759 | 1.3393 | 0.9687 |
| PCHAS_145490 | 0.3869 | 0.0682 | 0.6603 | 0.1021 | 0.1299 | -0.31  | -0.022 | -0.169 | -0.463 | -1.432 | -0.363 | -0.513 |
| PCHAS_102010 | -0.696 | -1.115 | -0.457 | 0.1333 | -0.403 | -0.269 | 0.3415 | 0.9677 | -0.417 | 1.4007 | 1.0267 | 1.3075 |
| PCHAS_124040 | -0.539 | -0.616 | -0.271 | 0.102  | 0.1058 | 0.1757 | -0.587 | 0.171  | 0.15   | 0.6519 | -0.066 | 0.6295 |
| PCHAS_112070 | -0.027 | 0.4983 | 0.4925 | 0.3732 | 0.3415 | 0.0496 | 0.0791 | -0.089 | -0.108 | -1.219 | -0.601 | -0.835 |
| PCHAS_051870 | -0.167 | 0.2576 | 0.4984 | 0.2538 | 0.2606 | 0.0676 | 0.7153 | -0.183 | 0.0094 | -1.214 | -0.176 | -0.526 |
| PCHAS_060290 | -0.305 | -0.053 | 0.4525 | 0.3956 | 0.2186 | 0.0027 | -0.026 | -0.363 | -0.15  | -0.644 | -0.306 | -0.436 |
| PCHAS_050220 | 0.3133 | 0.8204 | 0.6329 | 0.3994 | 0.0409 | -0.096 | -0.246 | -0.418 | -0.137 | -1.282 | -1.096 | -0.708 |
| PCHAS_082480 | -0.694 | 0.5823 | 0.3675 | -0.161 | 0.0775 | -0.113 | -0.035 | 0.2723 | 0.0319 | 0.0236 | -0.179 | 0.057  |
| PCHAS_130410 | -0.376 | 0.0148 | 0.0036 | -0.272 | 0.1039 | -0.36  | 0.5142 | 0.5964 | -0.253 | -0.798 | 0.373  | -0.638 |
| PCHAS_072750 | -0.796 | -0.969 | -0.648 | -0.042 | 0.0999 | 0.1046 | 0.2679 | 0.6844 | 0.1756 | 0.7024 | -0.581 | 0.3834 |
| PCHAS_062040 | 0.0132 | 0.1901 | 0.2757 | 0.2017 | 0.0856 | 0.1713 | 0.4548 | 0.2105 | 0.1967 | -0.522 | 0.0329 | -0.563 |
| PCHAS_081410 | 0.9727 | 0.6312 | 0.5388 | 0.3703 | 0.1382 | -0.255 | -0.255 | -0.221 | -0.394 | -0.751 | -0.426 | -0.488 |
| PCHAS_140930 | 0.7413 | 0.3876 | 0.2737 | -0.009 | 0.0087 | -0.179 | 0.0304 | -0.119 | -0.215 | -0.078 | -0.558 | -0.193 |
| PCHAS_100900 | 0.0436 | 0.5131 | 0.405  | 0.5032 | 0.045  | 0.3444 | -0.94  | -0.074 | 0.1616 | -0.26  | -0.39  | -0.292 |
| PCHAS_134570 | 0.676  | -0.091 | 0.4798 | -0.206 | 0.003  | 0.0847 | 0.4914 | 0.4171 | 0.1108 | 0.0579 | 0.9545 | 0.2694 |
| PCHAS_073040 | 0.7231 | 0.3869 | 0.0049 | -0.004 | -0.313 | -0.223 | 1.3781 | 0.4643 | -0.229 | 0.0342 | 0.7862 | 0.125  |
| PCHAS_120820 | 0.8226 | -0.133 | 0.3176 | 0.0387 | -0.148 | -0.928 | -0.136 | -0.67  | -0.512 | -1.631 | -0.825 | -1.257 |
| PCHAS_021040 | 0.0067 | 0.3573 | -0.059 | 0.1556 | 0.0538 | -0.043 | -0.2   | -0.293 | -0.098 | 0.0082 | 0.1641 | 0.1426 |
| PCHAS_101860 | 0.4571 | 0.0417 | 0.3624 | 0.3041 | 0.1829 | 0.0634 | -0.081 | 0.2524 | -0.334 | -0.965 | -2.531 | -0.244 |
| PCHAS_140970 | 0.6834 | 0.1316 | -0.375 | 0.1561 | -0.055 | 0.01   | -0.257 | -0.061 | -0.053 | -0.774 | -0.947 | -0.184 |
| PCHAS_103100 | 0.4022 | 0.5247 | 0.8055 | 0.2787 | 0.0073 | -0.043 | -0.103 | -0.428 | -0.087 | -1.143 | -1.257 | -0.882 |
| PCHAS_062450 | 0.0022 | 0.2726 | 0.7023 | -0.331 | 0.0926 | -0.84  | 0.0508 | -0.591 | -0.624 | -0.92  | 0.0088 | -0.596 |
| PCHAS_080580 | -0.02  | -0.163 | 0.9063 | 0.1645 | 0.2592 | 0.0574 | 0.7014 | -0.304 | 0.0968 | -1.21  | -1.028 | -0.769 |
| PCHAS_114520 | -0.079 | -0.347 | 0.0106 | -0.266 | -0.01  | 0.0994 | 0.7435 | 0.5725 | 0.0813 | 0.2143 | 0.2775 | -0.086 |
| PCHAS_100460 | 0.5577 | 0.041  | 0.2185 | 0.0716 | 0.0557 | -0.08  | -0.271 | -0.11  | -0.164 | -0.018 | 0.3425 | -0.034 |



|              |        |        |        |        |        |        |        |        |        |        |        |        |
|--------------|--------|--------|--------|--------|--------|--------|--------|--------|--------|--------|--------|--------|
| PCHAS_144540 | -0.108 | -0.166 | 0.2274 | 0.1771 | 0.2242 | 0.2981 | -0.197 | 0.036  | 0.3417 | -0.086 | 0.1495 | 0.2292 |
| PCHAS_102020 | 0.1706 | 0.2109 | 0.255  | 0.1923 | 0.2018 | 0.3005 | 0.0837 | -0.302 | 0.1042 | 0.0494 | -0.02  | 0.1022 |
| PCHAS_102150 | 0.5668 | 0.4018 | 0.164  | 0.4255 | 0.1312 | -0.165 | -0.307 | -0.575 | -0.233 | -1.304 | -0.944 | -0.876 |
| PCHAS_135700 | -0.596 | -0.736 | -0.519 | -1.17  | -0.535 | -0.26  | 0.2724 | 0.1412 | -0.035 | 0.7477 | 0.9637 | 0.6224 |
| PCHAS_131760 | -0.168 | 0.3592 | 0.3707 | 0.0859 | 0.0707 | -0.571 | -0.01  | 0.02   | -0.277 | -0.509 | -0.325 | -0.591 |
| PCHAS_120250 | 0.8835 | -0.073 | 0.0158 | 0.0737 | -0.042 | 0.1939 | 0.4632 | -0.239 | 0.0371 | 1.3067 | 0.3694 | 1.1912 |
| PCHAS_132440 | 1.3442 | 0.3986 | 0.8192 | 0.4594 | 0.1159 | 0.5213 | 1.2938 | 0.6588 | 0.6958 | -0.248 | -0.5   | 0.0461 |
| PCHAS_141810 | -0.085 | -0.158 | 0.0424 | 0.2908 | -0.142 | -0.422 | -0.31  | 0.1057 | -0.318 | -0.412 | -0.243 | -0.431 |
| PCHAS_136930 | 0.275  | -0.095 | 0.0375 | 0.7056 | 0.5264 | 0.1209 | -0.845 | -0.364 | 0.0287 | -1.109 | -1.334 | -0.921 |
| PCHAS_113640 | 0.6267 | -0.139 | -0.895 | -0.022 | -0.278 | -0.333 | 0.3197 | 0.2415 | 0.2595 | 0.9732 | 0.17   | 0.7769 |
| PCHAS_144030 | 0.4651 | 0.65   | 0.5287 | 0.5534 | 0.109  | -0.164 | -0.882 | -0.553 | -0.221 | -0.369 | -1.182 | 0.0264 |
| PCHAS_031070 | -0.439 | 0.3136 | 0.4226 | 0.4491 | 0.282  | -0.127 | 0.5316 | 0.0233 | -0.034 | -0.759 | -1.111 | -0.482 |
| PCHAS_040220 | -0.493 | -0.319 | -0.068 | -0.009 | 0.0693 | 0.1458 | 0.8351 | 0.576  | 0.1622 | 0.1532 | 0.392  | -0.069 |
| PCHAS_120970 | 0.3819 | 0.2411 | 0.22   | 0.1922 | 0.1252 | -0.24  | 0.0736 | -0.741 | -0.322 | -1.697 | -0.775 | -1.089 |
| PCHAS_142380 | -0.724 | -0.266 | -0.062 | -1E-03 | 0.0766 | 0.2113 | 0.291  | 0.6138 | 0.2445 | 0.0476 | 0.3405 | 0.2555 |
| PCHAS_040460 | 0.7855 | 0.5932 | 0.4125 | 0.314  | 0.0266 | 0.0881 | -1.504 | -0.672 | -0.178 | -0.162 | -0.291 | -0.221 |
| PCHAS_102210 | -0.244 | 0.5528 | 0.5694 | 0.5694 | 0.2741 | 0.128  | 0.0091 | -0.039 | 0.2028 | -0.704 | -0.046 | -0.367 |
| PCHAS_141490 | -0.108 | 0.0094 | 0.4205 | -0.217 | 0.0248 | -0.298 | 0.4285 | -0.069 | -0.212 | -0.523 | 0.4291 | -0.43  |
| PCHAS_052000 | -1.371 | -0.769 | -0.521 | -0.528 | -0.013 | 0.0104 | 0.7666 | 0.6788 | 0.0497 | 0.627  | 0.4781 | 0.1312 |
| PCHAS_114010 | 0.2598 | 0.2047 | 0.4903 | 0.1731 | 0.0335 | -0.225 | 0.1377 | -0.155 | -0.114 | -0.796 | -0.08  | -0.508 |
| PCHAS_092730 | 1.0181 | 0.5423 | 0.861  | 0.285  | 0.0267 | -0.153 | -0.507 | -0.757 | -0.401 | -2.469 | -1.369 | -0.95  |
| PCHAS_120760 | -1.715 | -1.626 | -1.804 | -0.952 | -0.215 | 0.3966 | 1.1281 | 1.0082 | 0.46   | 0.6767 | 0.2359 | 0.3499 |
| PCHAS_137010 | -0.101 | -0.228 | 0.2106 | -0.13  | -0.407 | -0.33  | -0.806 | 0.3732 | -0.526 | -0.436 | -1.226 | -0.908 |
| PCHAS_030960 | 0.3974 | -0.232 | 0.7252 | 0.2273 | 0.1635 | -0.182 | -0.369 | -0.203 | -0.498 | -0.617 | -0.198 | -0.425 |
| PCHAS_083170 | -0.108 | 0.3958 | 0.289  | 0.1823 | 0.1453 | 0.1051 | 0.3796 | -0.004 | -6E-04 | -0.329 | -0.25  | -0.341 |
| PCHAS_083010 | -0.868 | -0.197 | 0.0477 | 0.1001 | -0.117 | -0.327 | -0.377 | -0.016 | -0.213 | -0.336 | 0.084  | -0.559 |
| PCHAS_031380 | 0.2414 | -0.493 | 0.0248 | -0.324 | 0.1782 | 0.2527 | 0.0813 | -0.51  | 0.0354 | 0.2788 | 1.0726 | 0.2438 |
| PCHAS_121220 | 0.961  | 0.4975 | 0.7225 | 0.2608 | 0.1963 | -0.418 | -0.481 | -0.892 | -0.452 | -1.721 | -0.749 | -0.925 |
| PCHAS_131850 | 0.2145 | -0.381 | 0.2246 | -0.469 | -0.122 | -0.208 | -1.458 | 0.3094 | -0.265 | 0.0572 | 0.4985 | -0.289 |
| PCHAS_091370 | 0.3628 | 0.0251 | -0.126 | -0.049 | -0.094 | -0.102 | 0.3512 | -0.045 | -0.105 | 1.7345 | 1.6045 | 1.015  |
| PCHAS_132640 | -0.427 | 0.0576 | 0.5734 | 0.392  | -0.117 | -0.313 | 0.2577 | 0.4496 | -0.273 | -0.87  | 0.4688 | -0.255 |
| PCHAS_070170 | 0.4412 | 0.8485 | 0.8855 | 0.7876 | 0.4386 | -0.57  | -0.98  | -1.37  | -0.543 | -2.819 | -2.689 | -1.52  |
| PCHAS_070330 | 0.1591 | 0.3664 | 0.0536 | 0.3571 | -0.104 | 0.1769 | 0.2342 | 0.1227 | 0.0684 | 0.3697 | 2.556  | 0.4748 |
| PCHAS_060150 | 2.5021 | 0.267  | 0.1833 | 0.648  | -0.208 | -0.212 | -0.298 | -0.908 | 0.0181 | 0.9678 | 1.1272 | 0.1764 |
| PCHAS_131070 | -0.405 | -0.677 | -0.33  | 0.319  | 0.1927 | 0.5889 | 0.7563 | 0.2709 | 0.6923 | -0.076 | -0.275 | -0.044 |
| PCHAS_124250 | -0.255 | -0.04  | 0.1147 | -0.101 | -0.048 | -0.016 | 0.2182 | -0.295 | -0.056 | 0.2109 | 0.7984 | 0.4837 |
| PCHAS_113720 | -0.779 | -0.606 | -0.088 | -0.551 | 0.0162 | 0.1623 | 0.8343 | 0.9176 | 0.2562 | 0.7152 | 0.796  | 0.2983 |
| PCHAS_142630 | 0.3736 | -0.227 | -0.2   | -0.389 | -0.23  | 0.5592 | -0.466 | -0.282 | 0.4844 | 1.6034 | 1.7354 | 1.6061 |
| PCHAS_030410 | -0.143 | -0.072 | 0.1206 | 0.3032 | 0.1544 | 0.2659 | -0.289 | 0.1049 | 0.2366 | -0.036 | -0.551 | -0.094 |
| PCHAS_124080 | -0.024 | 0.1239 | 0.3283 | -0.307 | 0.1861 | -0.458 | -0.267 | -0.321 | -0.46  | -0.116 | 0.2091 | -0.179 |
| PCHAS_142820 | -0.048 | -0.089 | 0.4816 | 0.3971 | 0.4629 | 0.3401 | 0.1494 | 0.6669 | 0.2627 | 0.3886 | 0.1772 | 0.4542 |
| PCHAS_010570 | 0.5373 | -0.033 | 0.572  | -0.283 | 0.1696 | -0.169 | 0.6972 | 0.0498 | 0.2519 | 0.0702 | 0.4407 | -0.222 |
| PCHAS_083660 | -0.202 | -0.388 | -0.689 | -0.926 | -0.387 | 0.0474 | -0.795 | -0.056 | -0.083 | 0.2166 | 0.8636 | 0.6087 |
| PCHAS_080540 | 0.5654 | 0.2003 | 0.175  | -0.202 | -0.303 | -0.367 | -0.162 | -0.03  | -0.407 | -0.255 | 0.5653 | -0.202 |
| PCHAS_061370 | -0.116 | 0.3469 | 0.4938 | 0.3221 | 0.1339 | -0.172 | -0.103 | -0.367 | -0.075 | -0.789 | -0.655 | -0.566 |
| PCHAS_123570 | 0.9605 | -0.044 | -0.111 | -0.046 | 0.0358 | -0.049 | 0.5252 | 0.1196 | -0.042 | -0.553 | -0.109 | -0.466 |
| PCHAS_143610 | 0.6675 | 0.4589 | 0.2069 | 0.3406 | 0.1694 | 0.003  | -0.299 | -0.829 | -0.118 | -1.233 | -0.747 | -0.821 |
| PCHAS_134670 | 0.0225 | -0.583 | -0.461 | 0.281  | -0.175 | 0.5418 | -0.467 | 0.0967 | 0.6673 | 0.6006 | 0.9847 | 0.0178 |
| PCHAS_103930 | -0.767 | -0.34  | 0.333  | 0.1744 | 0.0153 | 0.5606 | 0.2453 | -0.021 | 0.3397 | -0.429 | -0.829 | -0.254 |
| PCHAS_103990 | -0.395 | 0.3508 | 0.7591 | 0.0352 | 0.2566 | -0.421 | 0.1019 | -0.834 | -0.453 | -0.58  | -2.418 | -0.808 |

|              |        |        |        |        |        |        |        |        |        |        |        |        |
|--------------|--------|--------|--------|--------|--------|--------|--------|--------|--------|--------|--------|--------|
| PCHAS_135990 | -0.193 | 0.9764 | 1.0476 | 0.6834 | -0.086 | 0.3509 | -0.89  | -0.371 | -0.003 | -0.881 | -1.243 | -0.715 |
| PCHAS_010300 | -0.434 | -0.959 | -0.378 | -1.139 | -0.112 | -0.023 | 0.764  | 0.7932 | -0.013 | 0.1018 | 0.4268 | -0.199 |
| PCHAS_140090 | -0.638 | -0.907 | -0.615 | 0.0697 | -0.09  | 0.5466 | 1.041  | 0.9761 | 0.5396 | 1.1816 | 1.4595 | 1.2307 |
| PCHAS_020990 | -0.263 | 0.5793 | 0.4404 | 0.7016 | 0.1643 | 1.0645 | 0.6707 | 0.7693 | 0.9987 | 0.1192 | 0.506  | -0.207 |
| PCHAS_103740 | -1.186 | -1.816 | -1.561 | -0.874 | 0.0155 | 0.4401 | 1.0474 | 1.2828 | 0.3292 | 0.7145 | 0.382  | 0.5125 |
| PCHAS_070630 | 0.1318 | -0.087 | 0.4578 | -0.09  | -0.032 | -0.138 | 0.6623 | 0.235  | -0.132 | -0.198 | 0.3715 | -0.181 |
| PCHAS_102250 | -0.048 | 0.2621 | 0.0928 | 0.2893 | 0.1259 | -0.325 | -0.498 | -0.596 | -0.449 | -0.595 | -1.277 | -0.311 |
| PCHAS_142370 | 0.0559 | 0.4121 | -0.457 | 0.4776 | -0.587 | 0.0507 | 0.5386 | 0.5317 | 0.282  | -0.191 | 0.1137 | 0.1561 |
| PCHAS_121170 | 0.401  | 0.5158 | 0.6876 | 0.4492 | 0.2331 | 0.4458 | -0.713 | -0.513 | 0.2563 | -0.851 | -1.089 | -0.314 |
| PCHAS_102880 | 0.7608 | 0.5379 | 0.3638 | 0.3254 | 0.0245 | -0.154 | -0.936 | -0.329 | -0.368 | -0.379 | -0.183 | -0.254 |
| PCHAS_072980 | 0.7806 | 0.5136 | 0.2078 | 0.1598 | 0.1933 | -0.194 | -0.027 | -0.596 | -0.171 | -0.836 | 0.1519 | -0.35  |
| PCHAS_110330 | 0.0063 | 0.2661 | 0.1305 | 0.135  | 0.1549 | -0.066 | -0.173 | -0.196 | -0.053 | -0.147 | -0.578 | -0.358 |
| PCHAS_071910 | -0.179 | 0.0353 | 0.1498 | 0.1164 | 0.1642 | -0.32  | 0.3578 | 0.3324 | -0.197 | -0.427 | -0.217 | -0.633 |
| PCHAS_130100 | 1.1486 | 0.0539 | -0.028 | -0.819 | -0.504 | -0.74  | -1.015 | -0.783 | -0.849 | 0.7121 | 1.0206 | 0.5433 |
| PCHAS_133070 | 0.2606 | 0.1373 | -0.221 | -0.77  | -0.64  | 0.0523 | -0.131 | -0.239 | -0.215 | 1.6263 | 2.5415 | 1.5344 |
| PCHAS_122340 | 2.0853 | 0.6834 | -1.156 | 0.4701 | -0.207 | 1.9843 | 1.5493 | 1.9628 | 1.8703 | 0.7369 | 1.1388 | 1.4127 |
| PCHAS_110090 | 0.4805 | 0.5577 | 0.3714 | -0.402 | -0.35  | -0.488 | -0.815 | -0.725 | -0.732 | -0.383 | 0.1223 | 0.4418 |
| PCHAS_103460 | 0.0921 | 0.5206 | 0.2676 | 0.4677 | 0.1053 | -0.06  | -0.788 | -0.495 | -0.084 | -1.059 | -1.286 | -0.955 |
| PCHAS_080890 | 0.4499 | -0.495 | -0.863 | -0.499 | -0.749 | 0.0887 | 0.1354 | 0.0493 | -0.024 | 0.4457 | 2.5104 | 0.631  |
| PCHAS_091160 | -0.8   | -0.217 | -0.084 | 0.1581 | 0.1165 | 0.0799 | 0.5579 | 0.5701 | 0.1356 | -0.318 | 0.2262 | -0.594 |
| PCHAS_090540 | 0.0972 | 0.2953 | 0.305  | 0.0183 | -0.17  | -0.044 | -0.446 | -0.434 | -0.116 | -0.979 | -0.745 | -0.805 |
| PCHAS_091040 | -0.266 | 0.3291 | 0.4045 | 0.266  | 0.0802 | -0.156 | -0.539 | -0.645 | -0.023 | -0.782 | -0.817 | -0.714 |
| PCHAS_123450 | -1.48  | -0.582 | -0.438 | 0.028  | 0.2654 | 0.3231 | 0.6195 | 0.6654 | 0.4258 | 0.0013 | -0.072 | -0.205 |
| PCHAS_122380 | -0.475 | -0.093 | 0.4878 | 0.4224 | 0.581  | 0.1608 | 0.0421 | 0.2782 | -0.089 | -0.422 | 0.2529 | -0.378 |
| PCHAS_144740 | 0.8725 | -0.734 | 0.6012 | 0.0987 | 0.0756 | -0.43  | 0.612  | -0.64  | -0.301 | -1.499 | -0.402 | -1.039 |
| PCHAS_146610 | 0.4064 | 0.2179 | 0.2571 | -0.038 | -0.45  | -0.283 | -0.427 | -0.403 | -0.26  | -0.315 | -0.422 | -0.144 |
| PCHAS_140820 | 0.5219 | 0.4389 | 0.3578 | 0.407  | 0.1642 | -0.215 | -0.67  | -0.615 | -0.543 | -0.861 | -1.228 | -1.031 |
| PCHAS_080460 | -0.232 | -0.641 | -6E-04 | -0.16  | 0.0351 | -0.164 | -0.204 | -0.288 | -0.844 | -0.632 | -0.664 | -0.47  |
| PCHAS_070230 | -0.203 | -0.628 | -0.184 | -0.49  | -0.125 | 0.8436 | 0.0717 | 0.6033 | 0.5475 | 0.8738 | 0.3922 | 0.5355 |
| PCHAS_070300 | -0.414 | 0.029  | 0.093  | 0.1935 | 0.1022 | 0.2113 | -0.056 | 0.2475 | 0.2345 | 0.4175 | -0.153 | 0.3837 |
| PCHAS_123900 | 0.3127 | 0.1304 | -0.308 | -0.084 | -0.436 | -0.374 | -0.205 | -0.742 | -0.313 | -0.015 | 0.1321 | -0.418 |
| PCHAS_135330 | -0.577 | -0.616 | -0.323 | -0.754 | -0.116 | 0.3693 | 0.6202 | 0.6018 | 0.5128 | 0.7053 | -0.403 | 0.584  |
| PCHAS_031130 | 0.0608 | 0.2179 | -0.224 | -0.347 | -0.243 | -0.217 | 0.3995 | -0.393 | -0.24  | -0.343 | -0.168 | -0.113 |
| PCHAS_070260 | -1.315 | -0.975 | -0.359 | -0.241 | 0.1095 | 0.266  | 0.7167 | 0.6521 | 0.3309 | 0.3255 | 0.1505 | 0.1905 |
| PCHAS_136560 | 0.0805 | -0.256 | 0.3685 | -0.276 | 0.0446 | -0.285 | 0.1437 | 0.274  | -0.279 | 0.0042 | 0.2465 | 0.147  |
| PCHAS_093830 | 1.2212 | 0.6846 | 0.2426 | -0.849 | -0.915 | -0.91  | -0.965 | -0.659 | -0.949 | 0.182  | 1.3595 | 0.3722 |
| PCHAS_136140 | 0.5402 | -0.265 | -0.112 | -0.141 | 0.1013 | 0.4062 | -0.391 | 0.0096 | 0.5383 | 1.0836 | -0.229 | 0.8908 |
| PCHAS_091260 | -0.712 | -0.082 | 0.2959 | 0.1737 | 0.2489 | -0.135 | 1.1062 | 0.6101 | 0.0303 | -0.205 | 0.1752 | -0.28  |
| PCHAS_011440 | 1.4185 | 1.2649 | 0.6079 | -0.048 | -0.241 | 0.1883 | -0.46  | 0.006  | -0.193 | 0.0513 | 3.2444 | 0.7085 |
| PCHAS_114130 | 0.4893 | 0.2649 | 0.4346 | 0.0688 | 0.1533 | -0.244 | 0.2828 | -0.154 | -0.2   | -0.374 | 0.6691 | 0.0338 |
| PCHAS_114120 | -0.431 | -0.113 | 0.2335 | -0.483 | -0.029 | -0.267 | 0.5722 | 0.3934 | -0.374 | -0.878 | -0.182 | -0.059 |
| PCHAS_092090 | 0.0168 | 0.0589 | 0.4638 | 0.2607 | 0.0056 | 0.1243 | -0.723 | -0.432 | -0.03  | -0.74  | -0.269 | -0.299 |
| PCHAS_072860 | 0.1313 | 0.5424 | 0.6377 | -0.002 | 0.0728 | 0.0175 | -0.602 | -0.516 | -0.26  | -0.641 | -0.043 | -0.633 |
| PCHAS_041960 | 0.2424 | 0.5665 | 0.4575 | 0.3776 | 0.3536 | 0.5079 | 0.0164 | 0.3939 | 0.4568 | -0.85  | -1.069 | -0.108 |
| PCHAS_141840 | -0.108 | 0.36   | 0.1699 | 0.018  | -0.07  | 0.0645 | 0.8603 | 0.3202 | -0.108 | 0.1684 | 0.4923 | 0.0274 |
| PCHAS_124610 | -0.102 | 0.0299 | -0.428 | 0.0434 | 0.1899 | 0.1599 | 0.7761 | 0.4749 | 0.0529 | 0.0986 | -0.476 | 0.2116 |
| PCHAS_080190 | 0.5277 | 0.6277 | 0.4761 | 0.1345 | 0.0233 | -0.253 | -0.673 | -0.365 | -0.403 | -0.831 | -1.387 | -0.538 |
| PCHAS_020350 | 1.2557 | 0.3477 | 0.6894 | -0.465 | -0.381 | -0.666 | 0.3495 | 0.428  | -0.284 | 0.547  | 1.2031 | -0.014 |
| PCHAS_091750 | -0.003 | 0.0459 | 0.3903 | 0.2114 | 0.255  | 0.2486 | 0.3765 | 0.1328 | 0.0768 | -0.443 | 0.074  | -0.284 |
| PCHAS_020360 | -0.159 | 0.2175 | 0.119  | 0.1252 | -0.01  | -0.026 | -0.43  | -0.342 | -0.139 | -0.529 | -1.251 | -0.434 |

|              |        |        |        |        |        |        |        |        |        |        |        |        |
|--------------|--------|--------|--------|--------|--------|--------|--------|--------|--------|--------|--------|--------|
| PCHAS_132380 | 0.32   | 0.2745 | -0.26  | -0.17  | -0.326 | -0.273 | -0.121 | -0.298 | -0.334 | -0.128 | 0.1219 | -0.216 |
| PCHAS_010770 | -1.288 | -0.483 | -0.317 | -0.216 | 0.2549 | 0.1001 | 0.521  | 0.4748 | 0.237  | -0.261 | -0.283 | -0.679 |
| PCHAS_112720 | 0.3749 | 0.4534 | 0.6317 | 0.2568 | 0.0183 | -0.462 | -0.848 | -1.049 | -0.469 | -1.26  | -0.769 | -1.143 |
| PCHAS_082620 | 0.3587 | -0.798 | -1.173 | -1.185 | -0.32  | 0.8865 | -0.426 | -0.903 | 0.9309 | 1.3818 | 1.1043 | 1.3597 |
| PCHAS_130370 | -0.177 | 0.105  | 0.0888 | 0.373  | 0.1825 | -0.214 | -0.15  | -0.002 | -0.27  | -0.445 | -0.559 | -0.089 |
| PCHAS_090370 | -0.651 | 0.4653 | 0.2942 | 0.8104 | 0.3421 | 1.1916 | -0.379 | -0.032 | 0.5156 | -0.639 | -0.862 | -0.43  |
| PCHAS_140770 | 0.4609 | 0.1969 | 0.2805 | -0.025 | -0.088 | -0.954 | 0.1324 | -1.053 | -1.167 | -0.939 | -1.384 | -1.047 |
| PCHAS_041890 | 0.3297 | 0.6019 | 0.4986 | 0.7207 | 0.3204 | -0.526 | -1.306 | -1.291 | -0.707 | -1.566 | -1.545 | -1.272 |
| PCHAS_135260 | -0.647 | 0.2851 | -0.142 | 0.0093 | -0.095 | -0.503 | -0.265 | 0.4406 | -0.333 | -0.026 | 0.4819 | -0.517 |
| PCHAS_100680 | 0.167  | 0.0383 | -0.018 | -0.05  | -0.194 | -0.061 | 0.1451 | 0.2006 | 0.0341 | -0.305 | -0.069 | 0.2317 |
| PCHAS_060910 | 1.0067 | 0.0785 | -0.085 | -0.025 | 0.0637 | -0.151 | -0.38  | -0.246 | -0.435 | -0.533 | -0.035 | -0.581 |
| PCHAS_121460 | 3.6644 | 0.4272 | 0.9335 | 0.2428 | 0.1659 | -0.566 | -0.196 | -0.314 | -0.518 | -1.069 | -0.959 | -0.467 |
| PCHAS_136010 | -0.44  | -0.126 | -0.054 | 0.4431 | 0.2858 | 0.2054 | 0.6137 | 0.0386 | 0.3065 | -1.113 | -0.397 | -0.63  |
| PCHAS_103880 | -1.473 | -0.916 | -0.506 | -0.347 | 0.0388 | 0.6495 | 0.4879 | 0.78   | 0.3168 | 0.6119 | 0.1911 | 0.5541 |
| PCHAS_082830 | 0.7009 | 0.2901 | 0.2702 | -0.001 | 0.136  | -0.093 | -0.185 | -0.09  | -0.143 | -0.572 | -0.162 | -0.107 |
| PCHAS_134650 | 0.3178 | 0.0179 | -0.066 | -0.405 | -0.254 | -0.304 | 0.418  | 0.3029 | -0.426 | 0.348  | 0.2788 | 0.7318 |
| PCHAS_134800 | -0.072 | -0.485 | 0.1165 | -0.195 | 0.0923 | 0.1801 | -0.09  | -0.065 | 0.0644 | 0.8453 | 0.0725 | 0.6297 |
| PCHAS_130360 | 0.5128 | 0.3963 | 0.7266 | 0.0356 | -4E-04 | 0.0638 | 0.0795 | -0.265 | -0.161 | -0.701 | 0.5044 | -0.444 |
| PCHAS_124300 | 1.0748 | 0.1012 | 0.5497 | 0.0946 | -0.043 | 0.1492 | 0.511  | -0.282 | 0.1917 | -0.737 | 1.0518 | -0.246 |
| PCHAS_050640 | 0.632  | 0.4945 | 0.4986 | 0.0842 | 0.0654 | 0.141  | -0.205 | -0.042 | -0.135 | 0.0214 | 1.229  | 0.1458 |
| PCHAS_103490 | 0.2208 | -0.187 | 0.2126 | -0.213 | 0.1599 | 0.741  | 0.6218 | 0.5759 | 0.3035 | 0.7834 | 0.4975 | 0.5819 |
| PCHAS_133160 | -0.397 | -0.136 | 0.7451 | 0.0525 | 0.3644 | -0.216 | 0.5125 | 0.485  | -0.119 | -0.277 | 0.2376 | -0.434 |
| PCHAS_142000 | 0.2811 | -0.248 | 0.3617 | -0.076 | 0.1045 | 0.008  | 1.0127 | 0.3125 | -0.013 | -0.271 | 0.2473 | -0.229 |
| PCHAS_070060 | 0.3172 | 0.4419 | 0.4218 | 0.4886 | 0.1096 | -0.112 | -0.193 | -0.327 | -0.094 | -0.386 | -0.146 | -0.919 |
| PCHAS_121410 | -0.331 | 0.3017 | 0.2633 | -0.02  | 0.154  | 0.0006 | 0.2474 | -0.06  | 0.2416 | -0.531 | 0.06   | -0.499 |
| PCHAS_132590 | -0.525 | 0.146  | 0.0452 | -0.192 | -0.131 | -0.534 | -0.455 | -0.094 | -0.286 | -0.282 | 0.8828 | -0.14  |
| PCHAS_110720 | -0.231 | -0.014 | 0.7471 | -0.448 | 0.3066 | -0.452 | 0.3729 | 0.1799 | -0.451 | -0.12  | 0.8325 | -0.353 |
| PCHAS_040240 | -0.546 | -0.477 | -0.373 | 0.1842 | 0.2145 | -0.243 | 0.4309 | -0.161 | -0.107 | -0.45  | -0.812 | -0.336 |
| PCHAS_072670 | 0.1044 | 0.4325 | 0.3426 | 0.4153 | 0.2181 | 0.0121 | -0.596 | -0.276 | -0.163 | -0.728 | -0.712 | -0.355 |
| PCHAS_136720 | 0.516  | 0.3276 | 0.1885 | 0.2157 | 0.1095 | 0.0819 | -0.337 | -0.24  | 0.0206 | -1.009 | 0.3965 | -0.492 |
| PCHAS_122100 | 0.4084 | 0.1243 | 0.4458 | -0.118 | -0.142 | 0.5384 | -0.057 | -0.242 | -0.048 | 0.0137 | 0.7982 | 0.1359 |
| PCHAS_061280 | -0.998 | -0.683 | -0.574 | -0.569 | 0.1375 | 0.1095 | 0.8905 | 0.7272 | 0.3206 | 0.021  | -0.113 | -0.326 |
| PCHAS_100290 | 0.4544 | 0.5073 | 0.1748 | 0.498  | 0.213  | 0.0193 | -0.06  | -0.729 | -0.021 | -1.57  | -1.243 | -1.142 |
| PCHAS_072120 | 0.3869 | 0.2523 | -0.042 | -0.06  | 0.1104 | 0.4927 | 0.3592 | 0.024  | 0.4958 | -0.733 | -0.548 | -0.369 |
| PCHAS_081280 | 0.0009 | 0.4839 | 0.5892 | 0.5205 | 0.1634 | -0.251 | 0.0445 | -0.49  | -0.212 | -1.209 | -1.237 | -0.815 |
| PCHAS_101180 | -0.459 | -0.129 | 0.3324 | 0.2257 | 0.3277 | 0.0842 | -0.082 | 0.1851 | 0.0369 | -0.018 | -1.371 | -0.217 |
| PCHAS_060660 | 0.132  | 0.2054 | -0.411 | 0.8029 | -0.174 | -0.164 | -0.453 | -0.775 | -0.279 | -1.35  | -1.319 | -0.568 |
| PCHAS_102500 | -0.092 | -2.266 | -0.785 | -0.158 | -0.06  | 0.0842 | 0.1688 | -0.104 | -0.123 | 0.3702 | 0.195  | 0.288  |
| PCHAS_061940 | 0.6866 | 0.0995 | 0.5467 | -0.515 | -0.169 | -0.35  | 0.5821 | -0.013 | -0.305 | -0.604 | 0.6167 | -0.596 |
| PCHAS_112060 | 0.153  | 0.213  | 0.0951 | 0.1853 | 0.0928 | -0.163 | -0.803 | -0.528 | -0.323 | -1.197 | -0.698 | -0.778 |
| PCHAS_040630 | 0.5409 | 0.0848 | 0.5864 | 0.1611 | 0.3477 | -0.225 | 0.1865 | 0.0054 | -0.156 | -0.483 | 0.0942 | -0.487 |
| PCHAS_143190 | 0.6433 | 0.3676 | 0.5534 | 0.1117 | -0.084 | -0.335 | -0.103 | -0.152 | -0.309 | -0.496 | -0.613 | -0.432 |
| PCHAS_051860 | -0.361 | -1.356 | -1.549 | -1.468 | -0.531 | -0.024 | 0.5631 | 0.1519 | -0.06  | 1.5202 | 1.2428 | 1.6366 |
| PCHAS_020400 | -0.729 | 0.3384 | -0.394 | 0.7467 | 0.3265 | -0.154 | -0.239 | -0.55  | -0.056 | -0.941 | -1.453 | -0.663 |
| PCHAS_130460 | -0.746 | -0.507 | -0.443 | -0.057 | 0.0379 | 0.3481 | 0.6893 | 0.4131 | 0.3904 | -0.324 | -0.451 | -0.653 |
| PCHAS_092450 | 0.0506 | 0.2883 | 0.6566 | 0.2519 | 0.0595 | -0.189 | -0.259 | 0.009  | -0.181 | -0.454 | 0.4732 | -0.106 |
| PCHAS_101500 | -0.088 | 0.0161 | 0.683  | 0.0975 | 0.0359 | 0.151  | -0.332 | -0.023 | -0.096 | -0.518 | 0.0419 | 0.1059 |
| PCHAS_135520 | 0.2332 | -0.065 | 0.527  | 0.2111 | 0.2594 | -0.224 | 0.5054 | -0.377 | 0.0105 | -1.067 | -0.571 | -0.792 |
| PCHAS_061650 | 0.2447 | 0.2384 | 0.331  | 0.246  | -0.031 | -0.007 | -0.132 | -0.354 | -0.301 | -0.791 | -0.308 | -0.455 |
| PCHAS_131380 | 0.1154 | -1.175 | -0.437 | -1.372 | -0.098 | 0.0857 | 0.7447 | 0.403  | -0.06  | 1.2958 | 1.1898 | 0.7695 |

|              |        |        |        |        |        |        |        |        |        |        |        |        |
|--------------|--------|--------|--------|--------|--------|--------|--------|--------|--------|--------|--------|--------|
| PCHAS_083480 | -0.576 | -0.276 | 0.3736 | 0.0851 | 0.1972 | 0.0931 | 0.7752 | 0.5795 | 0.214  | -0.499 | 0.1712 | -0.482 |
| PCHAS_146500 | -0.167 | 0.1503 | 0.1672 | 0.2118 | 0.0773 | 0.0347 | -0.464 | -0.105 | 0.0501 | -0.244 | -1.057 | -0.073 |
| PCHAS_122800 | -0.761 | -0.146 | -0.143 | 0.0093 | 0.0296 | 0.1192 | 0.0849 | 0.3897 | 0.1855 | 0.3805 | 0.2371 | 0.1834 |
| PCHAS_145660 | 0.2789 | 0.316  | 0.2985 | 0.2348 | -0.075 | -0.223 | -0.074 | -0.385 | -0.177 | -0.801 | -0.292 | -0.55  |
| PCHAS_140380 | 0.372  | 0.0903 | 0.1906 | 0.1286 | 0.1847 | -0.42  | -0.149 | -0.419 | -0.353 | -1.059 | -0.644 | -0.832 |
| PCHAS_091700 | -0.436 | -0.885 | -0.557 | -0.577 | -0.393 | -0.192 | 0.6706 | -0.143 | -0.045 | 1.9732 | 1.7662 | 1.505  |
| PCHAS_103550 | 0.0626 | -0.008 | -0.026 | -0.268 | 0.081  | -0.153 | 0.2281 | 0.2511 | -0.175 | 0.2086 | 0.4425 | 0.0364 |
| PCHAS_021240 | 0.0888 | 0.1861 | 0.4057 | 0.0182 | 0.1861 | -0.167 | -0.047 | 0.1485 | -0.227 | -0.394 | -0.831 | -0.139 |
| PCHAS_102160 | -0.508 | -1.445 | -0.723 | -1     | -0.424 | 0.0714 | 0.2706 | 0.609  | -0.067 | 1.8732 | 1.5532 | 1.3247 |
| PCHAS_113030 | 0.4648 | 0.281  | 0.1387 | -0.135 | -0.194 | -0.505 | -0.292 | -0.582 | -0.203 | 0.0688 | 0.8937 | 0.0057 |
| PCHAS_061480 | -0.345 | -0.08  | 0.3323 | 0.3302 | 0.1852 | 0.1323 | -0.101 | 0.1648 | 0.1152 | 0.036  | 0.0564 | -0.051 |
| PCHAS_131410 | 0.0378 | -0.001 | 0.1752 | -0.133 | 0.0928 | -0.159 | 0.1795 | -0.016 | -0.099 | -0.516 | -0.109 | -0.658 |
| PCHAS_040600 | -0.263 | 0.5935 | 0.7029 | 0.2437 | 0.3797 | -0.097 | -0.31  | 0.0645 | -0.175 | -0.318 | -0.01  | -0.03  |
| PCHAS_140540 | -0.122 | -1.257 | -1.046 | -0.668 | -0.073 | 0.5123 | 0.3147 | 0.494  | 0.4578 | 1.047  | 0.1751 | 0.8714 |
| PCHAS_144930 | 0.5189 | -0.149 | -0.234 | -0.104 | -0.149 | -0.118 | -0.016 | 0.3932 | -0.164 | 0.4687 | 0.6889 | 0.706  |
| PCHAS_091560 | -0.019 | -0.259 | 0.0779 | 0.0097 | 0.0459 | 0.0095 | -0.106 | -0.032 | -0.158 | -0.087 | -0.45  | -0.339 |
| PCHAS_051530 | 0.4238 | -0.483 | -0.651 | -0.772 | -0.232 | 0.1148 | -0.17  | -0.553 | 0.1627 | 1.7421 | 1.9255 | 1.8585 |
| PCHAS_111250 | -0.402 | 0.4233 | 0.3213 | 0.4754 | 0.1575 | 0.2762 | -0.301 | 0.1611 | 0.2866 | 0.1572 | 0.1887 | 0.0708 |
| PCHAS_123260 | 0.4371 | -0.814 | 0.4274 | 0.8296 | -0.185 | -0.414 | 1.5945 | 0.6924 | -1.131 | 0.4833 | 0.5409 | 0.9317 |
| PCHAS_051050 | -0.456 | 0.1119 | 0.0053 | 0.2401 | 0.0803 | 0.5744 | -0.328 | -0.12  | 0.0443 | -0.012 | -0.402 | 0.0161 |
| PCHAS_140720 | -0.006 | 0.1567 | 0.1149 | -0.025 | 0.0474 | 0.1507 | 0.2559 | 0.1425 | -0.108 | -0.222 | 0.1149 | 0.0154 |
| PCHAS_111020 | -0.526 | -0.073 | 0.2223 | -0.175 | 0.0748 | -0.084 | 0.6116 | 0.3596 | 0.0049 | -0.128 | -0.013 | -0.142 |
| PCHAS_140690 | 1.1467 | -0.317 | 0.3162 | -0.11  | -0.051 | -0.109 | 0.3556 | 0.1468 | 0.1494 | 0.6188 | 1.5356 | 0.2329 |
| PCHAS_092270 | 0.6876 | -0.075 | -0.3   | -0.335 | -0.202 | 0.1639 | -0.378 | -0.297 | 0.1375 | 1.0423 | 2.1145 | 1.0472 |
| PCHAS_083360 | -0.113 | -1.362 | -0.619 | -0.401 | -0.16  | 0.9001 | -0.129 | 0.5997 | 0.5711 | 1.6258 | 1.7241 | 1.8925 |
| PCHAS_011280 | 0.8463 | 0.1209 | -0.466 | -1.019 | -0.362 | 0.142  | -0.69  | -0.922 | 0.0292 | 1.4877 | 1.3387 | 1.9565 |
| PCHAS_141160 | -0.152 | 0.0323 | -0.289 | 0.0736 | -0.062 | -0.069 | -0.152 | 0.1488 | -0.127 | -0.17  | -0.402 | 0.0673 |
| PCHAS_093590 | 0.7866 | -1.322 | -0.501 | -0.637 | -0.514 | -0.14  | -0.048 | -0.69  | -0.064 | 0.6202 | 2.1876 | 0.8291 |
| PCHAS_143600 | 0.1987 | -0.008 | -0.14  | -0.238 | -0.011 | -0.359 | 0.4226 | 0.2596 | -0.205 | -0.097 | 0.2477 | -0.176 |
| PCHAS_130870 | 0.2749 | -0.747 | -0.781 | -1.604 | -0.771 | -0.435 | -0.302 | -0.441 | -0.531 | 1.0945 | 1.6725 | 1.5832 |
| PCHAS_114300 | 0.7601 | 0.3527 | 0.5948 | -0.255 | -0.215 | -0.278 | -0.46  | -0.383 | -0.343 | -0.179 | 0.866  | -0.097 |
| PCHAS_020560 | 0.1439 | 0.342  | 0.4686 | 0.3562 | 0.006  | 0.2856 | -0.057 | 0.1225 | -0.095 | -0.265 | -0.106 | -0.221 |
| PCHAS_081340 | 0.1767 | -0.472 | -0.178 | -0.465 | -0.037 | 0.9232 | 0.2399 | 0.4629 | 0.604  | 0.9501 | 0.3282 | 0.6726 |
| PCHAS_141550 | -0.637 | 0.1445 | 0.9659 | 0.1474 | 0.067  | -0.705 | -0.722 | -0.099 | -0.655 | -0.748 | -0.361 | -0.352 |
| PCHAS_062310 | -0.288 | 0.0759 | 0.4222 | 0.3375 | 0.2817 | -0.034 | -0.392 | -0.548 | -0.186 | -1.257 | -1.377 | -1.217 |
| PCHAS_092980 | -0.314 | -0.19  | 0.0514 | 0.0935 | -0.014 | 0.2527 | 0.2136 | 0.0926 | 0.1802 | 0.095  | -0.014 | 0.0537 |
| PCHAS_140560 | -0.731 | -0.534 | -0.166 | -0.02  | 0.1348 | -0.143 | 0.4261 | 0.2427 | 0.0194 | -0.177 | -0.41  | -0.186 |
| PCHAS_134000 | 0.9922 | 0.3198 | 0.2191 | 0.0122 | -0.067 | -0.139 | 0.1443 | -0.296 | -0.151 | 0.11   | 0.188  | -0.095 |
| PCHAS_135960 | 0.0613 | 0.0502 | 0.2421 | -0.151 | -0.234 | -0.307 | -0.033 | -0.067 | -0.179 | -0.299 | 0.1134 | -0.159 |
| PCHAS_091180 | -0.132 | -0.121 | -0.517 | -0.483 | -0.064 | 0.2688 | -0.07  | 0.0573 | 0.1891 | 0.8439 | 0.6496 | 0.6405 |
| PCHAS_141750 | -0.691 | -0.855 | -0.838 | -0.323 | 0.112  | 0.6501 | -0.112 | 0.4135 | 0.7028 | 0.2795 | -0.713 | 0.0898 |
| PCHAS_101300 | -1.093 | -0.265 | 0.2002 | 0.0065 | 0.1017 | 0.1773 | -0.118 | 0.0128 | -0.167 | -0.292 | 0.0225 | -0.482 |
| PCHAS_030620 | -0.05  | 0.7391 | 0.8365 | 0.1495 | 0.2029 | -0.133 | -0.396 | -0.165 | -0.263 | -0.772 | -0.707 | -0.315 |
| PCHAS_111770 | -0.625 | -0.288 | -0.473 | -0.478 | -0.132 | -0.477 | -0.407 | 0.056  | -0.12  | -0.061 | 0.2206 | -0.084 |
| PCHAS_111910 | -0.67  | -0.808 | -1.473 | -1.145 | -0.658 | -0.128 | -0.814 | -0.06  | 0.0848 | 1.05   | 2.1202 | 1.0426 |
| PCHAS_021070 | -0.242 | -0.105 | 0.0698 | 0.2143 | 0.0154 | 0.9668 | 0.3649 | 0.119  | 0.5045 | -0.456 | -0.818 | -0.252 |
| PCHAS_146520 | 0.3305 | 0.071  | 0.1066 | -0.198 | 0.0037 | -0.403 | 0.3296 | 0.6024 | -0.474 | 0.0604 | 1.1173 | 0.0126 |
| PCHAS_121160 | 0.0304 | 0.6471 | 0.6588 | 0.2903 | 0.2813 | -0.395 | -0.658 | -1.334 | -0.339 | -2.14  | -0.376 | -1.342 |
| PCHAS_091100 | -0.543 | 0.2347 | 0.2519 | 0.5594 | 0.271  | -0.486 | -0.093 | -0.44  | -0.102 | -1.058 | -0.962 | -0.839 |
| PCHAS_124190 | -0.508 | -0.225 | -0.042 | 0.5136 | 0.3603 | 0.2609 | -0.112 | 0.0742 | 0.2505 | -0.568 | -0.812 | -0.363 |

|              |        |        |        |        |        |        |        |        |        |        |        |        |
|--------------|--------|--------|--------|--------|--------|--------|--------|--------|--------|--------|--------|--------|
| PCHAS_136710 | 0.1913 | -0.723 | -0.495 | -0.31  | -0.306 | -0.068 | 0.5297 | 0.3706 | 0.1221 | 1.9641 | 2.0192 | 1.4863 |
| PCHAS_132070 | 0.6279 | 0.3612 | 0.0938 | 1.4821 | -0.17  | 0.6861 | 0.8439 | 0.5227 | 0.7093 | 0.5983 | 0.8121 | 0.2705 |
| PCHAS_100380 | 0.4926 | -0.216 | -0.305 | -0.322 | -0.219 | -0.149 | -0.366 | -0.389 | -0.121 | 1.3244 | 1.9114 | 1.1316 |
| PCHAS_130520 | -0.385 | -0.747 | -1.459 | -0.085 | -0.477 | -0.258 | -0.435 | -0.157 | -0.368 | 0.016  | 0.7932 | 0.2826 |
| PCHAS_114020 | 0.0403 | -0.438 | 0.3801 | -0.041 | 0.008  | -0.013 | 0.893  | 0.2141 | -0.024 | -0.287 | 0.091  | -0.245 |
| PCHAS_140290 | 0.2875 | 0.47   | 0.3821 | 0.3105 | -0.011 | -0.275 | -0.477 | -0.44  | -0.204 | -1.175 | -1.599 | -0.911 |
| PCHAS_140910 | -0.259 | -0.549 | -0.633 | 0.8708 | -0.424 | 0.1912 | 1.0486 | 0.6945 | 0.4192 | 0.0241 | 0.7031 | 1.0595 |
| PCHAS_091080 | -0.643 | -0.83  | -0.798 | -0.846 | -0.422 | -0.494 | -0.015 | -0.286 | -0.268 | 0.8419 | 1.9192 | 0.7634 |
| PCHAS_110580 | 0.1962 | 0.4944 | 0.6705 | 0.2311 | 0.1766 | 0.5988 | -0.136 | 0.3394 | 0.2614 | -0.214 | -0.935 | 0.045  |
| PCHAS_061340 | -0.504 | -1.479 | -0.826 | -1.365 | -0.25  | -0.208 | 0.252  | 1.0401 | 0.0465 | 2.0526 | 1.9919 | 1.6171 |
| PCHAS_144230 | -0.376 | 1.1865 | 0.7535 | 0.7502 | -0.011 | -0.022 | -0.643 | -0.453 | 0.001  | -0.781 | -0.274 | -0.559 |
| PCHAS_112710 | -0.457 | -0.404 | -0.41  | 0.5793 | 0.5229 | 0.8726 | 0.4207 | 0.6336 | 1.0307 | -0.293 | -1.169 | -0.236 |
| PCHAS_061440 | -0.258 | -0.844 | -1.33  | -1.083 | -0.535 | -0.326 | -0.765 | 0.1148 | -0.229 | 1.9474 | 1.4579 | 1.0336 |
| PCHAS_101820 | -1.286 | -1.062 | -0.31  | -0.779 | -0.211 | -0.002 | 0.2671 | 0.5456 | -0.135 | 1.4646 | 1.2058 | 0.9255 |
| PCHAS_121910 | 0.0214 | -0.006 | -0.303 | -0.301 | -0.167 | -0.663 | 1.9906 | 0.257  | -0.283 | 0.3762 | 0.9185 | 0.3017 |
| PCHAS_123500 | 1.58   | 0.3857 | -0.793 | -1.154 | -0.905 | -0.654 | -1.594 | -0.696 | -0.63  | 0.2861 | 1.8183 | 0.8895 |
| PCHAS_051490 | 0.3162 | 0.0004 | 0.1315 | -0.192 | 0.132  | 0.0386 | 0.4766 | -0.302 | -0.061 | 0.3091 | 0.7257 | -0.065 |
| PCHAS_113000 | -1.319 | -0.068 | 0.6381 | -0.028 | 0.1632 | 0.2955 | -1.018 | 0.4587 | 0.2141 | -0.443 | 0.0741 | -0.574 |
| PCHAS_090210 | -0.974 | -0.122 | -0.449 | 0.1325 | -0.135 | -0.011 | 0.0539 | 0.3147 | 0.0024 | -0.488 | -0.158 | -0.68  |
| PCHAS_101620 | -0.082 | -0.224 | 0.6314 | -0.015 | 0.0847 | 0.1294 | 0.9935 | 0.3831 | 0.1493 | 0.1108 | 0.6797 | -0.063 |
| PCHAS_083400 | -0.199 | -0.836 | 0.5808 | 0.0479 | 0.1805 | -0.377 | 0.9129 | -0.231 | -0.243 | -0.869 | -0.077 | -0.314 |
| PCHAS_030640 | 0.9509 | 0.1322 | 0.6287 | -0.233 | 0.1217 | -0.505 | 0.4987 | -0.291 | -0.392 | -0.874 | 0.8885 | -0.698 |
| PCHAS_123350 | -0.352 | -0.58  | 0.0569 | -0.34  | 0.0936 | -0.428 | 0.0447 | 0.0574 | -0.372 | -0.077 | -0.232 | -0.569 |
| PCHAS_132900 | -0.476 | -0.072 | 0.5632 | 0.2777 | 0.1123 | 0.7589 | 1.4953 | -0.437 | 0.6957 | -0.542 | -0.405 | -0.075 |
| PCHAS_124450 | 0.1826 | 0.6834 | 1.1412 | 0.3474 | 0.2275 | -0.378 | -0.296 | -0.364 | -0.511 | -1.196 | -0.459 | -0.404 |
| PCHAS_145550 | 0.35   | -0.029 | 0.2505 | 0.0644 | 0.2221 | 0.1796 | 0.1461 | 0.2307 | 0.2567 | 0.4306 | 1.6628 | 0.4704 |
| PCHAS_132740 | -0.149 | 0.1578 | -0.173 | 0.4855 | 0.1374 | -0.18  | 0.7045 | 0.3344 | -0.107 | 0.0617 | 0.0607 | -0.567 |
| PCHAS_112170 | -0.187 | -0.707 | -0.407 | -0.402 | -0.279 | -0.072 | 0.9224 | 0.6576 | -0.171 | 1.3252 | 1.1544 | 0.7701 |
| PCHAS_092880 | -0.085 | -0.053 | -0.069 | -0.196 | 0.1064 | 0.0092 | 0.0616 | -0.032 | -0.408 | -0.857 | -0.109 | -0.279 |
| PCHAS_104140 | -1.172 | -2.042 | -1.735 | -1.769 | -0.441 | 0.4695 | 0.6074 | 1.31   | 0.4768 | 1.3469 | 0.3083 | 1.1175 |
| PCHAS_133200 | 0.0297 | 0.4433 | 0.2207 | -0.146 | 0.6533 | -0.136 | -0.256 | -0.385 | -0.299 | -0.98  | -1.883 | -1.402 |
| PCHAS_060530 | 0.1016 | 0.3151 | 0.5001 | 0.2485 | -0.01  | 0.0893 | -0.267 | -0.076 | -0.166 | -0.018 | 0.0638 | -0.581 |
| PCHAS_070500 | 0.8672 | -0.723 | -0.787 | -0.85  | -0.464 | 0.0931 | -0.915 | -0.584 | -0.011 | 1.5459 | 1.054  | 1.538  |
| PCHAS_052430 | -0.125 | 0.5316 | 0.3785 | 0.4835 | 0.1001 | 0.707  | -1.086 | 0.1015 | 0.3684 | -0.057 | 0.1618 | -0.173 |
| PCHAS_103610 | 0.1213 | 0.1103 | 0.6837 | 0.0943 | 0.1752 | -0.234 | 0.3516 | -0.439 | -0.238 | -0.443 | 0.2686 | -0.196 |
| PCHAS_112130 | 0.0402 | 0.3796 | 0.3084 | 0.2408 | 0.0422 | 0.179  | -0.264 | -0.33  | 0.0787 | -0.179 | -0.586 | -0.249 |
| PCHAS_122880 | -0.254 | -0.462 | -0.301 | -0.199 | 0.0193 | 0.3623 | 0.0239 | 0.2316 | 0.1276 | 0.2687 | 0.2282 | 0.0641 |
| PCHAS_101140 | -0.201 | 0.1628 | 0.4597 | 0.3817 | 0.4952 | 0.2801 | 0.2406 | -0.258 | 0.1923 | -1.306 | -1.001 | -1.144 |
| PCHAS_051710 | -0.333 | -0.59  | -0.292 | -1.43  | -0.873 | -0.256 | -0.462 | 0.0433 | -0.151 | 0.476  | 0.5113 | 0.4937 |
| PCHAS_090390 | -0.083 | 0.6757 | 0.6507 | 0.308  | 0.2818 | -0.667 | -0.623 | -0.986 | -0.406 | -1.424 | -1.43  | -1.189 |
| PCHAS_051380 | -0.323 | 0.6404 | 0.3163 | 0.2005 | 0.07   | -0.056 | -0.71  | -0.269 | -0.074 | -1.92  | -1.776 | -0.978 |
| PCHAS_100660 | 0.0283 | 0.6967 | 0.5901 | 0.0031 | 0.0494 | -0.347 | -0.825 | -0.806 | -0.43  | -0.343 | -0.863 | -0.303 |
| PCHAS_072450 | -1.069 | -0.594 | 0.0903 | -0.513 | 0.1402 | 0.1292 | 0.8013 | 0.4024 | 0.2406 | 0.4491 | 0.0292 | 0.3793 |
| PCHAS_080490 | 0.9947 | 0.4061 | 0.3806 | 0.4568 | 0.1302 | -0.295 | -0.463 | -0.952 | -0.29  | -1.588 | -0.57  | -1.056 |
| PCHAS_142260 | 0.4082 | 0.138  | -0.076 | -0.28  | -0.095 | 0.2868 | -0.314 | 0.2993 | 0.1019 | 0.1165 | -0.217 | 0.0425 |
| PCHAS_091360 | -0.174 | 0.3645 | -0.013 | 0.0636 | 0.0662 | -0.015 | 0.1949 | -0.213 | -0.428 | -0.522 | 0.0346 | -0.154 |
| PCHAS_114160 | 0.448  | 0.46   | 0.331  | 0.4005 | 0.0397 | 0.0263 | -0.417 | -0.221 | 0.0834 | -0.063 | -0.51  | 0.0733 |
| PCHAS_141590 | 1.0257 | 0.1729 | 0.3585 | 0.526  | -0.301 | 0.4093 | -0.168 | 0.8375 | -0.084 | -0.019 | 1.2382 | 1.1497 |
| PCHAS_114050 | 0.3965 | 0.2706 | 0.8155 | -0.29  | 0.2657 | -0.65  | -0.048 | 0.507  | -0.5   | 0.6708 | 0.7309 | 1.1647 |
| PCHAS_136400 | 0.2542 | 0.3539 | 0.0346 | 0.2808 | -0.003 | -0.211 | -0.304 | -0.211 | -0.129 | -1.315 | -0.652 | -0.283 |

|              |        |        |        |        |        |        |        |        |        |        |        |        |
|--------------|--------|--------|--------|--------|--------|--------|--------|--------|--------|--------|--------|--------|
| PCHAS_113330 | 0.2006 | 0.4499 | -1.086 | 0.7741 | 0.1364 | -0.014 | -0.128 | -0.005 | 0.2985 | 0.15   | 1.5101 | 0.253  |
| PCHAS_030830 | -0.541 | 0.1996 | 0.0269 | -0.118 | 0.0752 | -0.106 | -0.068 | -0.012 | -0.464 | -0.219 | -0.525 | -0.189 |
| PCHAS_110600 | -0.086 | -0.122 | -0.291 | 0.2569 | 0.0938 | 0.9045 | -0.171 | 0.0267 | 0.1536 | 0.5325 | 0.3955 | 0.5529 |
| PCHAS_050250 | 0.5682 | 0.1436 | 0.6751 | 0.547  | 0.2815 | -0.096 | 0.2435 | -0.47  | -0.124 | -1.108 | -0.901 | -0.902 |
| PCHAS_144800 | -0.237 | -0.184 | 0.1322 | -0.305 | 0.0087 | 0.0929 | 0.2457 | 0.0269 | 0.0575 | 0.123  | 0.5644 | 0.2384 |
| PCHAS_140060 | 0.5982 | 0.9393 | 0.9284 | -1.015 | -1.006 | -1.076 | -1.326 | -1.507 | -0.919 | -1.032 | 0.1747 | -0.287 |
| PCHAS_140450 | -0.836 | -0.637 | -0.588 | -0.51  | -0.024 | 0.5901 | 0.6459 | 0.552  | 0.4148 | 0.5685 | -0.068 | 0.3313 |
| PCHAS_040760 | -0.193 | -1.409 | 0.4763 | -0.158 | 0.052  | -0.425 | -1.567 | 0.2376 | -0.429 | 1.0235 | 0.3697 | 0.5175 |
| PCHAS_130490 | 0.3336 | -0.091 | 0.0228 | 0.4635 | 0.2421 | -0.298 | -0.553 | -0.508 | -0.467 | -0.687 | -0.592 | -0.308 |
| PCHAS_081160 | -0.425 | -0.273 | -0.333 | -0.011 | 0.095  | 0.0362 | 0.4032 | 0.1758 | 0.0485 | -0.573 | -0.508 | -0.414 |
| PCHAS_114430 | -0.101 | -0.006 | -0.688 | 0.5419 | 0.2739 | 0.7571 | -0.931 | -0.554 | 0.6624 | 0.2587 | -0.912 | 0.0189 |
| PCHAS_120190 | -0.334 | -0.151 | -0.14  | 0.2037 | 0.1892 | 0.5841 | -0.115 | 0.7082 | 0.5542 | 0.1259 | -0.922 | -0.084 |
| PCHAS_010940 | -0.739 | 0.0454 | -0.725 | -1.548 | -0.031 | 0.3083 | 0.9727 | -0.057 | 0.5582 | 0.6319 | 0.3778 | 0.5133 |
| PCHAS_133870 | -0.7   | -0.544 | -0.085 | -0.064 | 0.2943 | 0.5014 | 0.8016 | 0.6093 | 0.3501 | -0.396 | -0.123 | -0.567 |
| PCHAS_072630 | -1.095 | -0.762 | -0.933 | 0.2742 | -0.547 | 0.7498 | 0.848  | 1.0568 | 0.72   | 0.9575 | 0.7133 | 0.8057 |
| PCHAS_041150 | 0.021  | 0.0915 | 0.4495 | -0.387 | -0.11  | -0.182 | 0.0245 | -0.078 | -0.241 | -0.347 | -0.284 | -0.593 |
| PCHAS_141510 | -0.477 | 0.1616 | 0.545  | -0.529 | -0.503 | 0.0474 | 0.8458 | -0.436 | 0.0277 | 1.7661 | -0.049 | 0.2239 |
| PCHAS_141250 | 0.0296 | -0.243 | -0.482 | 0.1183 | -0.324 | 0.2515 | 0.581  | -0.132 | 0.0637 | 0.7714 | -0.039 | 0.573  |
| PCHAS_030630 | 0.8111 | 0.7877 | 0.669  | 0.1766 | -0.131 | -0.106 | -0.171 | -0.066 | -0.032 | -0.354 | -0.142 | 0.0824 |
| PCHAS_111580 | -0.281 | 0.229  | -0.154 | 0.2045 | -0.043 | 0.1008 | 0.6297 | 0.6897 | -0.131 | 0.6013 | 0.6529 | 0.454  |
| PCHAS_133760 | -0.289 | -0.05  | 0.2744 | -0.021 | 0.0627 | -0.062 | 0.1881 | 0.2489 | -0.048 | -0.399 | 0.0032 | -0.232 |
| PCHAS_133890 | -0.153 | -0.229 | 0.2122 | -0.671 | -0.071 | 0.0415 | 0.3088 | 0.0744 | 0.0768 | 0.0255 | 0.5401 | 0.2739 |
| PCHAS_101890 | 1.2474 | 0.2385 | -0.237 | -0.877 | -0.721 | -0.948 | -0.649 | -0.768 | -0.917 | -0.394 | 0.9197 | 0.0897 |
| PCHAS_080820 | 0.3075 | 0.4548 | 0.1933 | 0.3411 | -0.084 | -0.158 | -0.535 | -0.721 | -0.257 | -0.285 | -0.772 | -0.228 |
| PCHAS_134040 | -0.663 | -1.063 | -1.717 | 0.4163 | -0.45  | 0.9118 | -0.235 | 0.2278 | 0.835  | 1.522  | 0.8395 | 0.7543 |
| PCHAS_103210 | 0.5419 | -0.113 | -0.039 | -0.428 | -0.4   | -0.605 | 0.2729 | -0.04  | -0.652 | -0.09  | 0.4147 | 0.1246 |
| PCHAS_103660 | -1.039 | -0.262 | 0.2082 | 0.0431 | -0.047 | 0.3997 | 0.2671 | 0.2831 | -0.33  | -0.003 | -0.172 | 0.0162 |
| PCHAS_141760 | -0.877 | -0.079 | 0.0457 | 0.4183 | 0.2322 | 0.0729 | 0.6422 | 0.1728 | 0.0761 | -0.591 | -0.385 | -0.603 |
| PCHAS_131280 | 0.035  | 0.141  | -0.054 | -0.079 | -0.147 | -0.244 | -0.253 | 0.1727 | -0.177 | -0.071 | 1.5263 | 0.2049 |
| PCHAS_100530 | -1.28  | -0.376 | -0.27  | 0.134  | 0.3833 | 0.467  | 1.2941 | 0.3508 | 0.5035 | -0.173 | 0.1307 | -0.483 |
| PCHAS_092400 | 0.2962 | 0.0902 | 0.1644 | -0.059 | -0.059 | 0.0975 | -0.808 | -0.291 | 0.0794 | 0.4046 | 0.0557 | 0.4097 |
| PCHAS_050600 | 0.4535 | 0.2268 | 0.2111 | -0.108 | -0.235 | -0.312 | -0.654 | -0.459 | -0.331 | -0.057 | 0.1784 | 0.0254 |
| PCHAS_082760 | 0.4292 | 0.0815 | -0.241 | 0.2432 | -0.289 | 0.3056 | -0.257 | -0.046 | 0.1973 | 0.1102 | 1.1353 | 0.65   |
| PCHAS_145790 | 0.1937 | -0.179 | -0.229 | -0.133 | -0.123 | -0.325 | 0.2161 | 0.1901 | -0.251 | -0.486 | -0.161 | -0.364 |
| PCHAS_141930 | -0.64  | -0.09  | 0.2289 | 0.3629 | 0.0975 | 0.4688 | 0.6447 | -0.009 | 0.2898 | -0.663 | -0.733 | -0.508 |
| PCHAS_102180 | 0.4217 | 0.5395 | 0.5942 | 0.3252 | 0.065  | -0.087 | -0.585 | -0.435 | -0.206 | -0.428 | -0.139 | -0.278 |
| PCHAS_114530 | -0.167 | -0.068 | 0.2469 | 0.003  | 0.2932 | 0.185  | 0.5208 | 0.5333 | 0.2036 | -0.434 | -1.99  | -0.862 |
| PCHAS_091130 | 0.3626 | 0.1988 | 0.1653 | 0.1343 | 0.0024 | -0.206 | -0.148 | -0.277 | -0.181 | -0.521 | -0.321 | -0.283 |
| PCHAS_131830 | -0.702 | -1.032 | -0.846 | -0.58  | -0.272 | 0.5449 | -0.096 | 0.876  | -0.061 | 0.5769 | 1.6016 | 0.3292 |
| PCHAS_050740 | 0.2968 | 0.3642 | 0.5515 | 0.1582 | 0.169  | 0.0764 | 0.0644 | 0.0456 | 0.1353 | 0.0814 | 0.4284 | 0.0921 |
| PCHAS_030720 | -0.884 | -1.179 | -1.211 | -1.93  | -0.237 | 0.4743 | -0.38  | -0.429 | 0.4892 | 0.8973 | 0.6001 | 0.3494 |
| PCHAS_021290 | -0.264 | -1.119 | -0.747 | -1.587 | -0.494 | 0.2461 | -0.098 | 0.2817 | -0.144 | 1.8057 | 1.6479 | 1.4466 |
| PCHAS_110900 | 0.3344 | -0.222 | -0.151 | 0.07   | -0.433 | -0.111 | 0.0586 | 0.5841 | -0.056 | 0.7211 | -0.047 | 0.141  |
| PCHAS_136330 | 0.4784 | 0.5588 | 0.8424 | 0.0755 | 0.1254 | -0.066 | 0.8569 | -0.366 | -0.055 | -1.097 | -0.555 | -0.354 |
| PCHAS_030910 | -0.532 | -0.353 | 0.3003 | -0.257 | 0.1252 | 0.0505 | 0.4143 | 0.6217 | 0.0091 | 0.3051 | 0.3808 | -0.095 |
| PCHAS_071780 | 0.5514 | 0.0006 | -0.883 | 0.9406 | -0.019 | -0.245 | 1.4586 | 1.1027 | -0.339 | 0.037  | 0.7809 | 0.9468 |
| PCHAS_121370 | -0.318 | 0.3545 | -0.156 | 0.3764 | 0.1677 | 0.1181 | -0.723 | -0.263 | 0.0056 | -0.041 | -1.434 | -0.185 |
| PCHAS_072730 | -0.249 | -0.15  | -0.051 | -0.106 | 0.2336 | 0.1466 | 0.057  | 0.2372 | 0.097  | 0.5434 | 0.4294 | 0.6908 |
| PCHAS_114500 | 0.352  | 0.2349 | 0.0347 | 0.3605 | 0.2535 | -0.034 | -0.345 | -0.344 | -0.171 | -1.133 | -0.78  | -0.867 |
| PCHAS_082190 | 0.3306 | -0.267 | -0.169 | -0.808 | -0.105 | -0.531 | -0.206 | 0.0017 | -0.571 | 1.2836 | 1.6189 | 0.3042 |

|              |        |        |        |        |        |        |        |        |        |        |        |        |
|--------------|--------|--------|--------|--------|--------|--------|--------|--------|--------|--------|--------|--------|
| PCHAS_123440 | -1.383 | -0.695 | -0.268 | 0.0839 | -0.03  | 0.5717 | 0.4954 | 0.8199 | 0.5532 | -0.066 | -0.075 | -0.188 |
| PCHAS_142890 | 0.2385 | -0.491 | 0.0992 | 0.1551 | 0.0581 | 0.0588 | 0.4972 | 0.2025 | 0.0726 | -0.174 | 0.0577 | -0.206 |
| PCHAS_102190 | 1.163  | 0.4284 | 0.2688 | -0.117 | -0.58  | -0.359 | 0.9079 | 0.0161 | -0.329 | -0.534 | 0.1571 | -0.344 |
| PCHAS_112010 | 0.0226 | 0.1757 | 0.7564 | 0.3053 | 0.5329 | -0.806 | -0.933 | -1.028 | -0.574 | -2.459 | -1.402 | -1.374 |
| PCHAS_145450 | 0.8451 | 0.317  | 0.4472 | -0.128 | -0.513 | -0.475 | -0.321 | -0.079 | -0.426 | -0.091 | 0.7378 | 0.0749 |
| PCHAS_140510 | -0.582 | -0.007 | -0.162 | -0.058 | 0.038  | -0.263 | 0.54   | 0.7226 | -0.127 | 0.2999 | 0.431  | 0.0328 |
| PCHAS_131400 | 0.3074 | -0.266 | -0.031 | -0.155 | -0.096 | -0.386 | 0.3687 | 0.0947 | -0.504 | -0.437 | 0.9865 | -0.683 |
| PCHAS_136130 | 0.2225 | 0.019  | -0.456 | 0.2912 | -0.627 | -0.251 | -0.497 | 0.002  | 0.3938 | 0.2761 | 0.5504 | 0.1926 |
| PCHAS_080380 | -1.685 | -1.476 | -0.924 | -0.36  | 0.2362 | 0.3667 | 1.0135 | 0.8352 | 0.3814 | 0.312  | 0.2355 | 0.1796 |
| PCHAS_121780 | -0.398 | -1.043 | -1.648 | -1.23  | -0.552 | -0.254 | 0.4211 | -0.347 | -0.287 | 1.7643 | 1.6756 | 0.9625 |
| PCHAS_062220 | 0.4053 | 0.3501 | 0.6733 | 0.1979 | 0.2434 | 0.0516 | 0.3684 | -0.148 | -0.077 | -1.025 | -0.124 | -0.675 |
| PCHAS_102610 | -0.282 | 0.1744 | 0.1719 | -0.129 | -0.249 | -0.172 | -0.453 | -0.61  | -0.085 | 0.2508 | 0.8243 | 0.1249 |
| PCHAS_133850 | 0.3605 | 0.3339 | 0.3348 | 0.2876 | -0.025 | -0.229 | 0.0915 | -0.483 | -0.362 | -0.666 | -0.444 | -0.348 |
| PCHAS_090440 | -0.126 | 0.0192 | -0.322 | -0.433 | -0.1   | 0.1168 | 0.3305 | 0.2911 | -0.043 | 0.4143 | 0.2723 | 0.3768 |
| PCHAS_145600 | -1.446 | -1.574 | -1.908 | -1.211 | -0.38  | 0.0353 | 0.1392 | 1.1562 | 0.7259 | 0.6879 | -0.436 | 0.3938 |
| PCHAS_113670 | 0.3036 | 0.2446 | 0.0155 | -0.007 | -0.117 | -0.102 | -0.72  | -0.729 | -0.208 | -1.065 | -0.404 | -0.38  |
| PCHAS_146690 | -1.05  | 0.0797 | 0.0204 | 0.7407 | 0.4736 | 1.3174 | 0.1832 | -0.003 | 0.5091 | -0.523 | -0.978 | -0.929 |
| PCHAS_103560 | -0.719 | -0.807 | -0.463 | -0.56  | -0.166 | 0.1902 | 0.2895 | 0.4199 | 0.1306 | 0.5346 | 0.2844 | 0.4458 |
| PCHAS_020920 | -0.338 | -0.106 | 0.0536 | -0.034 | -0.01  | 0.0233 | -0.07  | 0.1379 | -0.05  | 1.0485 | 1.138  | 0.2954 |
| PCHAS_061660 | 0.2204 | -0.706 | -0.093 | -0.772 | -0.329 | 0.3557 | 0.3609 | 0.6545 | 0.2107 | 0.9791 | 1.2171 | 1.2536 |
| PCHAS_072880 | -0.022 | 0.4733 | 0.3306 | 0.2817 | 0.0559 | 0.8091 | 0.2553 | 0.0585 | 0.2675 | -0.307 | 0.2918 | 0.2156 |
| PCHAS_070800 | 0.1771 | 0.3746 | 0.4481 | -0.492 | -0.211 | -0.528 | -0.101 | -0.54  | -0.28  | -0.394 | 0.7171 | -0.584 |
| PCHAS_103280 | 0.1491 | -0.047 | -0.022 | 0.4487 | 0.4084 | 0.1292 | 0.4952 | 0.4095 | 0.0387 | -0.369 | -0.172 | -0.739 |
| PCHAS_132600 | 0.7628 | 0.5562 | 0.7717 | 0.1495 | 0.0566 | -0.11  | -0.646 | -1.377 | -0.3   | -2.175 | -1.161 | -1.443 |
| PCHAS_010280 | 0.5723 | 0.5534 | 0.1186 | -0.091 | -0.021 | -0.599 | 0.1443 | -0.44  | -0.646 | -0.461 | -0.152 | -0.074 |
| PCHAS_020120 | 0.4194 | 0.466  | 0.4462 | 0.3465 | 0.0394 | 0.4348 | -6E-04 | 0.0721 | -0.191 | -0.229 | 0.7462 | -0.114 |
| PCHAS_130650 | -1.271 | -0.97  | -0.876 | -0.51  | 0.0159 | 0.2464 | 0.8791 | 0.6596 | 0.3212 | 0.3602 | 0.335  | 0.1487 |
| PCHAS_051770 | -0.455 | -0.344 | 0.2828 | -0.015 | -0.082 | -0.161 | 0.3115 | 0.2219 | -0.15  | 0.4001 | 0.6466 | 0.0618 |
| PCHAS_144240 | 1.1079 | 0.6471 | 0.4431 | 0.5593 | 0.1963 | -0.205 | -0.567 | -0.419 | -0.248 | -1.031 | 0.2259 | -0.368 |
| PCHAS_052270 | -0.195 | -0.225 | -0.099 | -0.16  | -0.236 | -0.067 | 0.3402 | 0.2632 | -0.047 | 0.1899 | 0.1417 | -0.27  |
| PCHAS_100300 | 0.1872 | -0.592 | -0.017 | -1.157 | -0.052 | 0.1501 | 0.1394 | 0.1723 | 0.1648 | 0.9629 | 1.6613 | 0.8759 |
| PCHAS_136810 | 0.4695 | 0.1854 | 0.429  | 0.3804 | 0.2789 | -0.068 | 0.2115 | -0.137 | -0.141 | -1.24  | -1.419 | -0.694 |
| PCHAS_000630 | -0.069 | -0.907 | -1.075 | 0.2914 | 0.4603 | 0.4421 | -0.44  | 0.3571 | 0.6388 | -0.322 | -0.689 | 0.1996 |
| PCHAS_093130 | 0.1579 | 0.3972 | 0.2068 | 0.4138 | -0.083 | -0.03  | -0.595 | -0.512 | -0.107 | -0.934 | -1.071 | -0.966 |
| PCHAS_132080 | 0.0169 | -0.044 | 0.2818 | 0.0192 | 0.1637 | 0.1421 | 0.7225 | 0.2096 | 0.121  | -0.517 | 0.0014 | -0.687 |
| PCHAS_145570 | -0.021 | -0.468 | -0.974 | -1.097 | -0.507 | -0.256 | -0.384 | -0.432 | -0.47  | 1.1835 | 1.2425 | 1.5968 |
| PCHAS_143930 | -1.856 | -0.852 | -0.464 | 0.653  | 0.3685 | 0.5056 | 0.0149 | 0.2493 | 0.5769 | -0.535 | -1.077 | -0.366 |
| PCHAS_041300 | 0.7497 | 0.4721 | 0.0626 | -0.063 | -0.246 | -0.274 | 0.0283 | -0.082 | -0.296 | -0.312 | 0.4818 | -0.214 |
| PCHAS_010730 | -0.123 | 0.0642 | 0.1693 | 0.2938 | 0.3842 | 0.4554 | -0.37  | -0.304 | 0.0377 | -0.179 | 0.0784 | 0.0416 |
| PCHAS_060960 | 0.2623 | -0.365 | -0.33  | -0.501 | -0.163 | 0.0836 | 0.3595 | 0.419  | 0.1089 | 0.4649 | 1.2803 | 0.6381 |
| PCHAS_051840 | 0.0868 | 0.2063 | 0.5115 | 0.4825 | 0.2123 | 0.074  | 0.5684 | 0.2881 | -0.018 | -0.39  | -1.706 | -0.056 |
| PCHAS_060330 | 0.5531 | 0.3765 | 0.3188 | 0.3379 | 0.1224 | -0.082 | 0.1202 | 0.1189 | 0.0091 | 0.5113 | -0.605 | 0.5998 |

*P. yoelii* (17xNL)

| geneid  | TP01    | TP02    | TP03    | TP04    | TP05    | TP06    | TP07    | TP08    | TP09    | TP10    | TP11    | TP12    |
|---------|---------|---------|---------|---------|---------|---------|---------|---------|---------|---------|---------|---------|
| PY03949 | 0.1286  | 0.0953  | 0.2081  | 0.025   | -0.3749 | -0.2519 | -0.0112 | -0.0221 | 0.2162  | -0.2653 | -0.3842 | 0.0526  |
| PY04568 | -0.6017 | -0.139  | -0.2661 | -0.0757 | -0.0927 | 0.2179  | 0.1401  | 0.195   | 0.1334  | 0.0666  | 0.5429  | -0.1114 |
| PY01526 | -0.331  | -0.0004 | -0.0534 | 0.024   | -0.1722 | -0.1234 | 0.3786  | -0.0094 | -0.0559 | 0.0549  | 0.0789  | -0.039  |
| PY06497 | 0.1619  | 0.1002  | -0.073  | -0.5293 | 0.1485  | 0.0736  | 0.0447  | -0.2953 | 0.1309  | -0.6323 | -0.2476 | 0.038   |
| PY07477 | 0.1906  | -0.0545 | 0.1481  | -0.1059 | 0.3381  | 0.411   | 0.0689  | -0.1289 | -0.0786 | -0.452  | 0.3426  | 0.026   |
| PY00391 | 0.0711  | 0.2302  | 0.0089  | -0.1062 | 0.2587  | -0.0753 | -0.2131 | 0.1189  | 0.0349  | 0.1119  | 0.4304  | 0.1381  |
| PY02837 | 0.2232  | -0.2032 | 0.0147  | 0.1642  | -0.1125 | -0.285  | 0.022   | 0.4437  | 0.1074  | 0.1212  | -0.1707 | -0.2714 |
| PY03898 | -0.2734 | -0.2771 | -0.5794 | 0.0095  | -0.4462 | -0.239  | -0.0765 | 0.1753  | 0.1356  | 0.3237  | 0.4451  | -0.4841 |
| PY03888 | 0.122   | -0.1318 | -0.2029 | -0.0031 | 0.1901  | 0.1202  | 0.0101  | 0.0305  | -0.1328 | -0.039  | 0.0057  | -0.0152 |
| PY07486 | -0.0485 | 0.0772  | -0.0582 | 0.4549  | -0.2381 | -0.3143 | -0.0666 | 0.2467  | 0.2821  | 0.012   | 0.0157  | 0.0553  |
| PY02842 | 0.0555  | -0.1783 | -0.4358 | 0.5102  | -0.0659 | 0.3942  | -0.094  | 0.3185  | 0.0019  | -0.0522 | 0.4029  | 0.0079  |
| PY05969 | 0.077   | 0.0334  | -0.5586 | 0.2451  | 0.0604  | 0.0355  | -0.2893 | -0.0226 | -0.0019 | 0.1881  | -0.1336 | -0.2355 |
| PY07128 | 0.0922  | 0.2884  | 0.3133  | -1.3049 | -1.3113 | -0.0422 | 0.136   | -1.19   | 0.1854  | -1.22   | -0.9171 | 0.2856  |
| PY06910 | 0.0936  | 0.321   | 0.0018  | -1.7834 | -0.0164 | -0.0545 | -0.0097 | -1.1935 | 0.0644  | -1.6821 | -1.1106 | 0.1298  |
| PY05923 | 0.2231  | -0.0327 | 0.0994  | -0.2208 | 0.2929  | -0.0174 | -0.06   | -0.1986 | -0.2818 | -0.7877 | -0.0688 | -0.8537 |
| PY01262 | 0.037   | -0.1763 | -0.0635 | -0.2938 | 0.071   | -0.2852 | 0.1318  | -0.1428 | 0.025   | -0.1169 | 0.0764  | -0.0291 |
| PY00802 | -0.4506 | -0.0577 | 0.316   | 0.146   | 0.3933  | -0.3617 | -0.1011 | 0.0312  | -0.3528 | -0.0165 | 0.4248  | -0.3729 |
| PY02204 | -0.2493 | -0.5456 | -0.3456 | 0.9225  | 0.0687  | -0.1239 | -0.3742 | 0.1504  | -1.1687 | 0.5483  | 0.5756  | -0.3448 |
| PY04271 | -0.2332 | -0.0594 | 0.0841  | 0.3324  | -0.2244 | -0.1478 | 0.2096  | 0.452   | 0.4311  | 0.011   | -0.1567 | -0.4424 |
| PY07378 | 0.0216  | 0.1095  | 0.0894  | 0.5096  | 0.0156  | 0.0992  | 0.3375  | 0.5009  | 0.1232  | 0.1271  | -0.2088 | 0       |
| PY01338 | -0.102  | -0.3238 | 0.0676  | -0.5452 | -0.106  | -0.1392 | -0.2882 | -0.251  | -0.084  | -0.1182 | -0.2181 | -0.2931 |
| PY03341 | 0.8154  | 0.3119  | 0.1405  | 0.0777  | -0.1538 | -0.1215 | 0.0129  | -0.0419 | 0.1145  | 0.0935  | -0.0891 | 0.1456  |
| PY06062 | 0.3138  | 0.3418  | 0.1334  | 0.0369  | 0.2566  | 0.0649  | -0.5284 | 0.0405  | 0.015   | 0.0295  | 0.3445  | 0.0006  |
| PY05102 | 0.6794  | 0.4279  | -0.0585 | 0.4533  | 0.1783  | -0.1368 | 0.0435  | -0.0828 | -0.3138 | -0.0764 | -0.1452 | -0.0543 |
| PY03948 | -0.2231 | 0.0979  | 0.0932  | -0.3224 | -0.2181 | -0.147  | 0.073   | -0.2363 | 0.159   | -0.7447 | -0.0253 | 0.2311  |
| PY01128 | 0.1216  | 0.2297  | 0.3669  | -1.7129 | -1.0164 | 0.0077  | 0.1308  | -1.1858 | 0.4615  | -1.1933 | -1.2645 | 0.0563  |
| PY04529 | 0.6164  | -0.0451 | -0.2204 | 0.2329  | -1.2192 | -0.2573 | 0.0111  | 0.0551  | 0.3326  | -0.2064 | -0.3551 | 0.0414  |
| PY01998 | -0.0849 | -0.1332 | 0.1233  | 0.3886  | 0.1885  | 0.1279  | 0.2327  | 0.1262  | -0.0199 | 0.2054  | -0.2688 | -0.2315 |
| PY02092 | 0.0365  | -0.3526 | -0.5171 | 1.1647  | 0.2204  | 0.1169  | 0.0689  | -0.3573 | -0.1652 | -0.2262 | -0.0407 | -0.3954 |
| PY00668 | -0.1357 | 0.0864  | -0.1817 | -0.0185 | -1.0484 | -0.4316 | -0.0085 | -0.1109 | 0.0506  | -0.5075 | -0.8142 | 0.1139  |
| PY03072 | -0.1724 | -0.0538 | 0.0069  | -0.0819 | 1.0652  | -0.0406 | -0.0123 | 0.0392  | 0.0487  | -0.298  | 0.7101  | -0.0265 |
| PY03105 | 0.0971  | 0.2649  | 0.3393  | -0.7119 | -1.0564 | -0.2911 | -0.0852 | -0.3843 | 0.1363  | -0.6886 | -0.9744 | -0.8996 |
| PY05758 | 0.2915  | 0.0136  | -0.0456 | -0.0151 | 0.6695  | 0.3948  | 0.0315  | -0.0824 | 0.0801  | -0.133  | 0.4438  | -0.0838 |
| PY05912 | 0.251   | 0.0151  | 0.0267  | 0.0533  | 0.699   | 0.067   | -0.1151 | 0.1338  | 0.1057  | 0.1687  | 0.4522  | -0.0375 |
| PY00271 | -0.2773 | 0.154   | -0.1342 | 0.6297  | -0.1928 | 0.0925  | 0.2636  | 0.1062  | -0.1809 | 0.1396  | -0.2782 | -0.0075 |
| PY02163 | 0.2878  | 0.0427  | 0.2721  | -0.0686 | 0.4619  | 0.0099  | 0.1649  | -0.0626 | 0.0914  | -0.3368 | 0.2841  | 0.1764  |
| PY02203 | -0.0918 | 0.1185  | 0.0837  | 0.3767  | 0.0962  | 0.109   | 0.0746  | -0.0089 | -0.179  | -0.0146 | -0.0918 | -0.6134 |
| PY07263 | 0.3593  | 0.2159  | 0.1768  | 0.6402  | -0.0578 | 0.0284  | -0.2938 | 0.5585  | 0.2146  | 0.2274  | -0.0141 | 0.0595  |
| PY01085 | -1.1254 | -0.4419 | -0.2089 | 0.0746  | -0.3674 | -0.1943 | 0.0459  | 0.2177  | 0.3936  | 0.2881  | 0.6735  | -0.0281 |
| PY00204 | 0.2324  | -0.2093 | 0.093   | -0.4093 | -0.9395 | -0.7241 | 0.057   | 0.037   | 0.2771  | -0.4368 | -0.7244 | 0.388   |
| PY06491 | -0.0123 | 0.0819  | -0.0894 | 0.2504  | 0.5203  | -0.0319 | 0.1619  | 0.2276  | 0.1446  | 0.5328  | 0.8474  | 0.2692  |
| PY01312 | -0.0786 | -0.1543 | -0.4041 | -0.0714 | -0.2848 | -0.1848 | -0.0306 | 0.3737  | 0.3125  | -0.1328 | -0.1652 | 0.0988  |
| PY02548 | -0.3568 | -0.0296 | 0.1758  | 0.1236  | 0.0007  | -0.2455 | -0.4465 | -0.0661 | -0.0519 | 0.1065  | 0.3551  | -0.0602 |
| PY04297 | 0.0786  | 0.241   | 0.1549  | -0.2604 | -0.6839 | 0.0284  | -0.0912 | 0.1281  | 0.1951  | -0.6633 | -0.6053 | 0.3919  |
| PY03691 | -0.4779 | 0.0611  | -0.1435 | -0.3938 | -0.9064 | 0.0408  | -0.3551 | 0.0507  | 0.4926  | -0.2851 | 0.0564  | -0.0507 |
| PY04384 | -0.2824 | -0.0545 | -0.6465 | -0.2631 | -0.1966 | -0.2657 | -0.148  | 0.0116  | 0.1469  | 0.5157  | -0.4531 | -0.0035 |
| PY06847 | -0.1633 | -0.6406 | -0.093  | -0.1689 | -0.0229 | -0.0138 | 0.3212  | -0.7521 | -0.2763 | 0.507   | -0.0309 | 0.3854  |
| PY03858 | 0.3188  | 0.2507  | 0.0484  | 0.5374  | -0.5298 | -0.3035 | -0.2216 | 0.1786  | 0.4085  | -0.6471 | -0.3046 | 0.0167  |
| PY04773 | 0.1148  | 0.1577  | -0.0429 | 0.0854  | 0.4799  | 0.1328  | -0.0776 | 0.1603  | -0.0207 | 0.0987  | 0.6384  | -0.8447 |
| PY00761 | -0.5712 | -1.1048 | -0.7724 | -0.0042 | -0.0558 | -0.1796 | -1.0792 | -0.1332 | 0.0385  | -0.1367 | 0.0257  | -1.0048 |
| PY00477 | -0.3688 | -0.0561 | -0.0133 | -0.4296 | 0.3828  | 0.2836  | 0.0223  | 0.0182  | -0.206  | -0.141  | 0.1484  | -0.6469 |
| PY04736 | 0.2259  | 0.1752  | 0.0776  | -0.1496 | -0.6308 | -0.3088 | -0.1013 | 0.0004  | 0.0426  | -0.4566 | -0.6488 | -0.0733 |
| PY02295 | -0.0926 | 0.0514  | 0.0336  | 0.3677  | 0.0509  | -0.0054 | -0.2954 | 0.4165  | 0.0862  | 0.3737  | 0.2709  | 0.4351  |
| PY02206 | 0.1454  | 0.2857  | 0.1418  | -1.2761 | -0.6121 | -0.0159 | -0.0017 | -0.5148 | 0.3171  | -0.6701 | -0.7006 | -0.2392 |
| PY04307 | -0.1461 | 0.2005  | 0.1633  | -2.1836 | -1.2296 | -0.1195 | 0.1184  | -1.2301 | -0.4292 | -1.123  | -1.1046 | -0.0184 |
| PY04097 | -0.2665 | -0.1679 | 0.2258  | -1.2014 | -0.6143 | -0.0577 | -0.0666 | -0.8711 | 0.0171  | -0.1444 | -0.4008 | 0.3292  |
| PY00126 | -0.1116 | -0.8758 | -0.4296 | 1.3465  | 0.5802  | 0.1185  | -0.2317 | 0.5269  | -0.6567 | 0.2434  | -0.0634 | -0.7466 |
| PY01695 | -0.356  | -0.3229 | -0.2212 | -0.1839 | 0.3551  | -0.0295 | -0.4063 | 0.2281  | -0.5616 | 0.3475  | 0.1543  | -0.333  |
| PY06810 | -0.048  | 0.1668  | 0.1245  | 0.3469  | 0.2802  | -0.0098 | -0.0553 | 0.1742  | -0.2363 | -0.2679 | -0.8913 | -0.3579 |
| PY00887 | -1.2021 | -0.5154 | -0.8369 | -0.4047 | -0.5144 | -0.6602 | -0.2726 | -0.0075 | 0.0438  | 0.2175  | 0.3566  | 0.1627  |
| PY07204 | 0.237   | -0.0219 | -0.124  | 1.0757  | 0.2665  | -0.3046 | -0.0352 | 0.386   | 0.0251  | 1.3642  | 0.512   | 0.0156  |



|         |         |         |         |         |         |         |         |         |         |         |         |         |
|---------|---------|---------|---------|---------|---------|---------|---------|---------|---------|---------|---------|---------|
| PY04996 | 0.1748  | -0.0257 | 0.0305  | 0.1104  | 0.5054  | 0.1463  | 0.1548  | 0.0467  | 0.2202  | 0.0645  | 0.5475  | 0.3231  |
| PY05526 | -0.9351 | -0.4185 | -0.2526 | 0.1162  | -0.0448 | 0.068   | -0.0569 | 0.0703  | 0.1107  | 0.3139  | 0.4085  | -0.1517 |
| PY04858 | 1.0597  | 0.1344  | -0.0782 | 1.7439  | 0.4185  | 0.178   | 0.0341  | 0.7001  | -0.1228 | 0.9402  | 0.1612  | -0.007  |
| PY01464 | -0.1085 | 0.091   | -0.114  | 0.7667  | 0.6003  | 0.3348  | 0.1447  | 0.307   | 0.2113  | 0.2906  | 0.851   | 0.0963  |
| PY01818 | -0.2941 | -0.3141 | -0.3917 | 0.0264  | 1.4639  | -0.2132 | -0.1359 | 0.2694  | -0.4045 | -0.6337 | 0.4185  | -0.8742 |
| PY00977 | -0.2153 | -0.1265 | -0.1754 | 0.6881  | -0.423  | -0.5201 | -0.2441 | 0.2149  | 0.135   | 0.1231  | -0.1852 | 0.0352  |
| PY00988 | 0.2127  | 0.1995  | -0.0141 | -0.9338 | 0.2042  | 0.0591  | -0.0829 | -0.328  | -0.3405 | -0.8081 | -0.7145 | -0.848  |
| PY03330 | 0.269   | -0.0094 | -0.0675 | 0.0708  | -0.0483 | 0.0425  | -0.0653 | -0.1192 | -0.1986 | -0.6429 | -0.0963 | -0.4766 |
| PY00455 | -0.0574 | -0.0048 | 0.1768  | 0.2365  | -0.3361 | 0.0252  | -0.0819 | -0.0336 | 0.2318  | -0.2019 | -0.1719 | 0.3096  |
| PY00993 | -0.5036 | -0.4767 | -0.3745 | 1.4624  | 0.6492  | 0.036   | -0.1062 | 0.5721  | -0.141  | 1.053   | 0.273   | 0.4069  |
| PY00556 | -0.2797 | -0.3765 | 0.1412  | 1.24    | 0.2951  | 0.2182  | -0.3603 | -0.0442 | -0.2198 | 0.3857  | 0.0011  | -0.3128 |
| PY05859 | -0.2647 | -0.1842 | 0.0697  | 0.062   | -0.2109 | 0.1505  | 0.2378  | 0.4028  | 0.3422  | -0.3153 | -0.1925 | 0.0118  |
| PY06083 | 0.1644  | 0.0224  | 0.1172  | 0.1181  | 0.3238  | 0.5308  | 0.0053  | -0.045  | 0.0242  | -0.3549 | 0.495   | -0.899  |
| PY00913 | -0.1452 | -0.227  | -0.1916 | 0.5374  | 0.4508  | -0.0259 | 0.022   | 0.0951  | 0.0539  | 0.5072  | 0.4624  | 0.0955  |
| PY00690 | -0.7642 | -0.5961 | -0.039  | -0.3478 | -0.7327 | -0.5976 | 0.0581  | 0.6643  | 0.4936  | 0.8818  | 1.5686  | 0.6217  |
| PY04452 | 0.0241  | 0.0352  | -0.3541 | 0.1968  | -0.5699 | 0.0817  | -0.2201 | 0.4819  | 0.1826  | 0.104   | 0.1916  | 0.0861  |
| PY00992 | -0.0586 | -0.3282 | 0.133   | 0.9268  | 0.1223  | -0.3314 | 0.0307  | 0.8294  | 0.1293  | 0.5515  | 0.1486  | 0.6375  |
| PY03742 | 0.0856  | -0.0377 | 0.2679  | -0.0862 | 0.0971  | -0.0563 | 0.0693  | -0.0127 | -0.0341 | -0.8418 | -0.0312 | -0.2866 |
| PY00493 | 0.3632  | 0.269   | 0.0012  | 0.2264  | -0.141  | -0.0435 | 0.3807  | -0.1936 | -0.1277 | -0.6802 | -0.4725 | 0.0764  |
| PY06895 | 0.2839  | -0.0657 | 0.08    | 0.3853  | 0.2841  | -0.0051 | -0.5831 | -0.0296 | 0.0735  | 0.5069  | 0.3949  | 0.4801  |
| PY00098 | -0.5923 | -0.6002 | -0.5403 | 1.2278  | -0.5953 | -0.1373 | -0.6195 | 0.3921  | -0.5958 | -0.1349 | 0.1169  | -0.7031 |
| PY05498 | 0.4012  | 0.2086  | 0.1127  | 0.1425  | -0.2044 | 0.0537  | 0.0301  | -0.2132 | 0.0375  | -0.1331 | -0.2804 | 0.1159  |
| PY06070 | 0.2194  | -0.0171 | 0.1579  | -0.2973 | 0.3265  | 0.3291  | 0.1525  | -0.1951 | -0.293  | 0.1773  | 0.2635  | -0.0372 |
| PY00641 | 0.2231  | -0.0128 | -0.119  | 0.1664  | 0.4967  | 0.0039  | 0.1606  | -0.0385 | 0.0024  | -0.0202 | 0.0399  | 0.1171  |
| PY04113 | -0.1213 | 0.0942  | 0.0274  | 0.3857  | 0.0486  | -0.2004 | -0.0511 | 0.3086  | 0.2387  | 0.6565  | 0.746   | 0.0477  |
| PY00341 | -0.2288 | -0.0961 | -0.5314 | 0.6367  | 0.2971  | -0.3037 | 0.0419  | 0.3231  | 0.5953  | 0.258   | 0.4129  | 0.2498  |
| PY04288 | 0.0981  | -0.0314 | 0.3799  | -0.6685 | -0.0251 | -0.0908 | 0.1626  | -0.4208 | 0.2911  | -0.0746 | -0.0953 | 0.3134  |
| PY02344 | 0.1974  | -0.1432 | -0.1043 | 1.014   | -0.0544 | 0.2388  | -0.0892 | 0.3081  | -0.083  | 0.4035  | -0.2893 | -0.495  |
| PY07422 | 0.1978  | 0.1448  | 0.0357  | -0.4078 | 2.3588  | -0.1465 | 0.1736  | -0.1209 | -0.323  | -0.6051 | -0.5651 | -1.0842 |
| PY07666 | 0.1832  | 0.0087  | 0.078   | 0.0419  | 0.1625  | -0.049  | 0.137   | -0.3058 | -1.1674 | -0.3175 | 0.2201  | -0.5889 |
| PY06437 | -0.2647 | -0.535  | -0.2534 | 0.5478  | -1.0114 | -0.2267 | -0.5243 | 0.5819  | -0.4966 | 0.6336  | -0.1078 | -0.4302 |
| PY07163 | 0.0712  | 0.0214  | 0.2351  | 0.4773  | 0.7764  | 0.3656  | 0.1482  | 0.2319  | 0.2891  | 0.3441  | 0.7819  | 0.2119  |
| PY00276 | -0.6018 | -0.3687 | -0.3453 | 0.8245  | 0.0338  | -0.1364 | -0.5827 | 0.3226  | -0.0686 | 0.4541  | 0.7513  | -0.5352 |
| PY01570 | -0.298  | -0.1154 | -0.1759 | 0.6764  | 0.2381  | -0.0351 | -0.1078 | 0.2448  | -0.0239 | 1.437   | 0.4578  | -0.293  |
| PY04791 | -0.1494 | -0.1923 | -0.1968 | -0.4828 | -0.4327 | -0.0573 | 0.0083  | -0.0399 | 0.5102  | -1.0312 | 0.2859  | 0.5472  |
| PY03331 | 0.1295  | 0.1076  | 0.0391  | -0.9011 | -0.1809 | -0.1607 | 0.0484  | -0.1483 | 0.031   | -0.624  | -0.2057 | -0.2243 |
| PY00989 | 0.1684  | 0.0233  | 0.0634  | -0.4517 | -0.7147 | -0.1872 | 0.1953  | -0.1999 | 0.1458  | -0.3916 | 0.0654  | 0.3495  |
| PY03971 | -1.0591 | -0.3564 | -0.3661 | -0.4503 | -0.2255 | -0.3872 | -0.2936 | 0.4815  | 0.0096  | -0.0039 | 0.4577  | -0.5007 |
| PY05318 | -0.444  | 0.314   | 0.2779  | 0.5167  | 0.1383  | 0.1012  | 0.0984  | 0.5049  | 0.2853  | 0.7455  | 0.0757  | 0.0583  |
| PY06514 | -0.2491 | -0.5474 | -0.3435 | 0.6057  | -0.7133 | -0.0749 | -0.6889 | 0.4215  | -0.276  | 0.6943  | -0.6348 | -0.5724 |
| PY04057 | -0.1159 | -0.7096 | -0.2849 | 0.4274  | -0.0532 | -0.057  | 0.1002  | 0.9644  | -0.0298 | 0.1835  | 0.2502  | 0.0121  |
| PY01466 | 0.3106  | 0.1486  | -0.1963 | 0.5161  | 0.4357  | 0.0013  | -0.1515 | 0.1371  | -0.1377 | 0.5904  | 0.4141  | 0.0919  |
| PY06335 | 0.2131  | -0.4299 | 0.1149  | -0.4437 | 0.2204  | 0.3274  | -0.1341 | 0.2643  | 0.1908  | -0.7943 | 0.3316  | 0.0095  |
| PY06139 | -0.6849 | 0.043   | 0.1287  | -0.384  | -0.0916 | 0.1071  | -0.0804 | 0.1548  | -0.0658 | -0.6642 | 0.2006  | -0.3677 |
| PY03625 | 0.2504  | 0.3744  | 0.3754  | 0.3753  | -0.1073 | 0.1384  | 0.5098  | 0.5161  | 0.612   | 0.7151  | -0.0358 | 0.6128  |
| PY04325 | 0.168   | 0.1828  | 0.3161  | -0.1349 | -0.24   | 0.029   | 0.1045  | -0.0006 | 0.3131  | 0.3352  | -0.1536 | 0.4812  |
| PY04453 | -0.3414 | -0.3707 | -0.2146 | 0.2681  | -0.4278 | -0.0868 | 0.0714  | 0.4082  | 0.2725  | 0.0845  | 0.0058  | 0.1425  |
| PY07430 | 0.1962  | 0.1936  | 0.0334  | 0.9812  | 0.2752  | -0.084  | 0.0435  | 0.2436  | 0.3087  | 0.6198  | -0.0658 | 0.0395  |
| PY01693 | 0.3462  | 0.3122  | 0.0093  | 0.5064  | 0.6755  | 0.1812  | 0.0672  | 0.1017  | -0.0182 | 0.7204  | 0.5021  | 0.0611  |
| PY04565 | -0.017  | -0.0075 | 0.0999  | -0.9206 | -0.4869 | -0.5979 | -0.0053 | -0.0012 | -0.8335 | -0.4868 | -0.3854 | -0.115  |
| PY01821 | 0.0376  | 0.2696  | -0.2193 | -0.5264 | -0.1354 | -0.2338 | 0.0998  | 0.1131  | 0.1565  | 0.3744  | 0.0406  | -0.0062 |
| PY07139 | -0.1223 | 0.1206  | -0.003  | 1.0871  | 0.3092  | 0.2083  | 0.0166  | 0.4921  | -0.2305 | 0.8103  | -0.2517 | -0.0947 |
| PY02281 | -0.5163 | 0.0367  | 0.205   | 0.1197  | -0.0758 | 0.1193  | 0.5747  | 0.4288  | 0.4685  | 0.0669  | -0.0203 | -0.0065 |
| PY06766 | 0.2879  | 0.2396  | -0.1655 | 0.8024  | -0.0355 | 0.1048  | 0.3908  | 0.5009  | 0.2778  | 0.2244  | 0.3784  | 0.5268  |
| PY07053 | 0.288   | 0.0796  | 0.0344  | 0.2981  | 0.9061  | 0.2816  | -0.0522 | -0.2412 | 0.0239  | -0.1149 | 0.3779  | 0.1526  |
| PY02539 | 0.3681  | 0.0414  | 0.0447  | 1.08    | 1.2607  | 0.6744  | -0.4336 | 0.8482  | -0.2318 | 0.9796  | 0.0839  | -0.2604 |
| PY05174 | -0.2527 | 0.1753  | -0.1438 | -0.0935 | 0.0715  | -0.0078 | -0.2683 | 0.1709  | -0.0539 | 0.1567  | 0.5126  | -0.0822 |
| PY07294 | -0.2438 | -0.0533 | -0.2654 | -0.7002 | -0.3652 | -0.4367 | -0.4508 | -0.0627 | 0.1331  | -0.016  | -0.5859 | 0.6081  |
| PY06608 | -0.2125 | 0.0923  | -0.7916 | 0.2178  | -0.0941 | 0.0576  | 0.0962  | 0.1268  | 0.549   | 0.5244  | 0.6251  | 0.2443  |
| PY04629 | -0.2228 | -0.2982 | -0.256  | 0.9551  | 0.2586  | -0.0236 | 0.1391  | 0.6407  | 0.0122  | 0.9463  | -0.1043 | -0.037  |
| PY07130 | -0.3414 | 0.0317  | -0.1931 | 1.3559  | 0.3496  | 0.3588  | 0.2426  | 0.3677  | -0.137  | 0.9932  | -0.1784 | 0.0838  |
| PY06982 | 0.3863  | 0.1741  | 0.1702  | -1.1683 | -0.4036 | -0.2166 | 0.133   | -0.7063 | -0.0627 | -1.263  | -0.876  | -0.2699 |
| PY05988 | 0.2311  | 0.1863  | 0.1191  | -0.5419 | -0.1897 | -0.2788 | -0.0124 | -0.6224 | 0.2201  | -0.7278 | -0.4232 | 0.089   |

|         |         |         |         |         |         |         |         |         |         |         |         |         |
|---------|---------|---------|---------|---------|---------|---------|---------|---------|---------|---------|---------|---------|
| PY00529 | -0.4335 | -0.2624 | -0.2147 | 0.933   | 0.4177  | -0.0368 | -0.367  | 0.4705  | 0.2019  | 0.4941  | 0.3712  | -0.4787 |
| PY03073 | -0.4968 | 0       | 0.165   | -0.2627 | -0.3443 | 0.1005  | 0.0848  | -0.0008 | -0.689  | -0.6506 | -0.0652 | -0.4051 |
| PY06197 | -0.0514 | 0.0403  | 0.0427  | -0.2133 | 0.1375  | 0.0287  | 0.1323  | -0.0265 | 0.027   | 0.3866  | -0.0993 | -0.0373 |
| PY04821 | -0.5494 | -0.1778 | -0.29   | 0.6094  | 0.512   | -0.0794 | -0.2863 | 0.1455  | -0.2636 | 0.0245  | 0.2675  | -0.3211 |
| PY00680 | -0.3895 | -0.0537 | -0.4898 | 0.8516  | 0.4928  | 0.5261  | -0.6781 | 0.7896  | -0.5059 | 0.6954  | 1.681   | -0.7273 |
| PY06288 | 0.0795  | 0.1094  | 0.1751  | -0.3756 | -0.4985 | 0.3259  | -0.1567 | -0.3823 | -0.1132 | -0.3853 | -0.4278 | 0.0448  |
| PY04514 | 0.2912  | -0.1162 | -0.0193 | 0.0951  | 0.3622  | 0.1022  | 0.0048  | -0.3364 | -0.3957 | -0.1541 | 0.3902  | -0.0438 |
| PY03647 | -0.7798 | 0.2599  | -0.0607 | 0.3381  | 0.1797  | -0.3452 | -0.0389 | 0.6708  | -1.0657 | 0.4499  | 0.23    | 0.0203  |
| PY03515 | 0.3078  | -0.0631 | -0.5    | 0.0479  | -0.3613 | -0.0091 | -0.0157 | -0.0244 | -0.7895 | -0.1899 | -0.2243 | -0.2518 |
| PY07091 | 0.256   | 0.1264  | 0.1976  | -1.6499 | -0.321  | -0.2069 | -0.0042 | -0.4152 | -0.6691 | -0.8002 | -0.1195 | -0.9577 |
| PY02121 | -0.3613 | -0.2284 | -0.3288 | -0.0849 | -0.506  | -0.4734 | -0.1727 | 0.1735  | 0.2095  | 0.3012  | 0.5021  | -0.1635 |
| PY04158 | 0.0071  | 0.001   | 0.0333  | -0.8503 | -0.138  | -0.2368 | -0.0719 | -0.2539 | 0.135   | -0.717  | -0.0031 | -0.02   |
| PY06184 | -0.3504 | -0.1695 | -0.4137 | -0.0655 | -0.4766 | -0.1767 | -0.3696 | 0.1929  | 0.368   | 0.0237  | -0.0473 | 0.3652  |
| PY00256 | 0.1423  | 0.4773  | 0.1813  | 0.2873  | 0.0371  | 0.4188  | 0.3289  | 0.177   | -0.7702 | -0.3713 | -0.6061 | -0.0778 |
| PY00599 | -0.8753 | 0.197   | -0.0554 | 0.1072  | -0.1158 | -0.1213 | 0.0452  | 0.6414  | 0.4283  | 0.8165  | -0.1601 | -0.0254 |
| PY07052 | 0.4689  | 0.0892  | 0.1693  | -0.6716 | -0.0454 | -0.0826 | -0.1559 | -0.2216 | -0.1305 | -0.344  | -0.6439 | -0.9583 |
| PY03438 | 0.0629  | -0.0036 | 0.0484  | 0.2286  | 0.1006  | -0.1681 | 0.057   | 0.1866  | 0.3022  | -0.5867 | -0.2741 | -0.0303 |
| PY02722 | 0.2634  | 0.0562  | -0.0695 | 0.225   | 0.8406  | 0.0254  | -0.5924 | 0.3834  | 0.0912  | 0.2951  | 0.9519  | 0.0426  |
| PY05781 | 0.317   | 0.3738  | 0.093   | 0.2243  | -0.3148 | -0.0115 | -0.1085 | 0.3307  | 0.2434  | 0.2345  | -0.197  | 0.0416  |
| PY00863 | -0.2735 | -0.2304 | -0.2166 | 0.5165  | 0.121   | -0.2942 | -0.0816 | 0.0317  | 0.018   | 0.285   | 0.3835  | 0.2318  |
| PY06731 | 0.2442  | 0.3064  | 0.1146  | 0.214   | 0.6932  | -0.1533 | -0.0739 | 0.0259  | 0.0336  | -0.1614 | 0.71    | -0.0337 |
| PY07187 | 0.0692  | -0.0696 | 0.1611  | -0.4176 | 0.1987  | 0.0048  | 0.1087  | -0.2232 | -0.6832 | -0.5941 | -0.0087 | -0.2112 |
| PY02610 | 0.0613  | 0.1695  | 0.072   | 0.0933  | 1.2355  | 0.0507  | 0.1373  | -0.5178 | 0.1846  | -0.2254 | -0.0483 | 0.3429  |
| PY06843 | 0.0288  | 0.1295  | 0.4132  | 0.2568  | -0.5376 | -0.3553 | -0.2002 | 0.2282  | 0.2782  | -0.0582 | 0.6906  | -0.0757 |
| PY04611 | -0.2538 | 0.012   | -0.2256 | 0.5317  | 0.2897  | 0.4226  | -0.0776 | 0.7161  | 0.0863  | -0.1974 | 0.1701  | -0.0169 |
| PY04378 | 0.2488  | 0.3131  | 0.2515  | 0.4044  | 0.0741  | 0.4912  | 0.6808  | 0.4069  | 0.1085  | 0.1711  | -0.5212 | -0.3335 |
| PY05868 | -0.0449 | -0.0061 | 0.0766  | -0.4495 | -0.3032 | -0.2799 | -0.3221 | -0.2735 | -0.1445 | -0.2427 | -0.0403 | -0.5245 |
| PY07668 | 1.195   | 0.0148  | -0.1438 | -0.1734 | 0.9738  | -0.0408 | 0.2041  | -0.567  | -0.3123 | -0.4989 | 0.2067  | 0.0815  |
| PY02712 | -0.4418 | -0.2044 | -0.2972 | 0.4828  | -0.7001 | -0.0516 | -0.0743 | 0.4484  | -0.047  | 1.4001  | -0.3724 | -0.5004 |
| PY02767 | -0.0156 | -0.0435 | 0.0406  | 0.7233  | -0.4477 | -0.0573 | -0.0813 | 0.7023  | 0.0756  | -0.07   | -0.1106 | 0.0422  |
| PY00257 | 0.0421  | -0.0849 | -0.0969 | 0.2726  | -0.1007 | 0.0071  | -0.0102 | 0.2199  | 0.1569  | 0.1922  | -0.0045 | -0.0935 |
| PY02555 | -0.4037 | -0.2921 | -0.2892 | 1.4849  | 0.624   | 0.3189  | -0.2241 | 0.5972  | -0.1243 | 1.1498  | 0.3478  | 0.3403  |
| PY01829 | -0.4696 | -0.5485 | -0.5041 | 0.3774  | 0.8907  | 0.3559  | -0.1543 | 0.3618  | -0.0505 | 0.3437  | 1.1512  | 0.0346  |
| PY06313 | -0.4065 | -0.0015 | 0.0732  | 0.793   | -0.988  | -0.2003 | -0.3649 | -0.086  | -0.1098 | -1.2005 | -0.8717 | -0.1654 |
| PY03133 | -0.1993 | -0.1242 | -0.3163 | 0.5046  | -0.3807 | -0.2343 | -0.0545 | 0.4205  | 0.4597  | 0.2146  | -0.0945 | -0.0661 |
| PY01658 | -0.2864 | -0.3805 | -0.2797 | -0.0017 | 0.5503  | -0.1481 | -0.0954 | 0.0997  | 0.0326  | -0.0433 | 0.411   | 0.0987  |
| PY02684 | -0.5247 | 0.107   | 0.1538  | 0.0228  | -0.1702 | 0.0027  | 0.0377  | 0.032   | 0.1398  | 0.0159  | -0.2593 | -0.2789 |
| PY03154 | 0.1979  | 0.0076  | 0.5069  | 0.9804  | 0.4487  | 0.1429  | 0.0192  | -0.1063 | -0.0898 | 0.4169  | -0.7294 | -0.1524 |
| PY04638 | -1.0191 | -0.2656 | -0.06   | -0.2164 | 0.0993  | -0.2928 | -0.4097 | -0.0601 | -0.0824 | 0.1993  | 0.3385  | -0.112  |
| PY07450 | 0.1308  | -0.0694 | 0.0289  | -0.9228 | -0.2978 | -0.3423 | 0.0353  | -0.6205 | -0.5347 | -0.9442 | -0.9541 | -0.9476 |
| PY03998 | 0.3657  | 0.053   | -0.3519 | -0.4543 | -0.2572 | -0.1458 | -0.2051 | -0.2444 | -0.1779 | -0.3952 | -0.5006 | -0.806  |
| PY00217 | -0.202  | -0.0878 | 0.0224  | 0.3986  | -0.2222 | 0.0085  | -0.0638 | 0.1699  | -0.5212 | 0.5377  | -0.2663 | -0.7112 |
| PY05492 | -0.289  | -0.0882 | -0.1934 | 0.0893  | 0.5774  | -0.0381 | -0.1848 | 0.5006  | 0.2977  | -0.1152 | 0.0281  | 0.1522  |
| PY03047 | 1.6111  | 0.3449  | -0.03   | 0.5636  | -0.0866 | -0.2779 | 0.1226  | 0.116   | -0.1081 | -0.739  | -0.1301 | 0.3352  |
| PY00133 | -0.1951 | -0.1802 | -0.3136 | 0.4654  | 1.2569  | 0.1507  | -0.0949 | 0.1309  | -0.0541 | -0.1887 | 0.3622  | 0.3075  |
| PY04104 | 0.1884  | 0.1817  | 0.4801  | 0.7202  | -0.0914 | -0.0433 | 0.2886  | -0.0543 | -1.6037 | 0.156   | 0.0034  | -0.0368 |
| PY04451 | -0.3619 | -0.045  | 0.0206  | 0.2518  | 0.5824  | 0.0715  | 0.0543  | 0.4515  | -0.0802 | -0.0233 | 0.3229  | -0.1253 |
| PY05554 | -0.0388 | -0.201  | -0.0401 | 0.18    | 0.5807  | 0.4443  | 0.2241  | 0.0397  | 0.0713  | -0.0736 | 0.2304  | 0.0578  |
| PY02071 | 0.0186  | -0.1183 | -0.0738 | 0.5894  | 0.4744  | 0.3506  | 0.1189  | 0.2715  | -0.151  | 0.3297  | -0.392  | 0.0128  |
| PY01837 | 0.2529  | 0.2536  | 0.0615  | 0.3493  | -0.5726 | -0.4694 | -0.0514 | 0.3553  | 0.3001  | -0.0215 | -0.2122 | 0.1726  |
| PY02011 | 0.3684  | -0.0136 | -0.6472 | 0.6409  | 0.1969  | 0.1137  | -0.4729 | 0.2373  | -0.1608 | 0.8839  | -0.0245 | 0.0147  |
| PY03800 | 0.2621  | -0.012  | 0.0532  | -0.8601 | -0.2674 | -0.1558 | -0.1941 | -0.6463 | -0.4457 | -0.8059 | -0.8724 | -0.8749 |
| PY06162 | -0.0337 | -0.4236 | 0.0673  | 0.0595  | -0.0831 | -0.1495 | -0.1247 | -0.1401 | 0.2537  | 0.0095  | 0.0617  | 0.2284  |
| PY05024 | 0.1879  | 0.2933  | 0.0902  | 0.4488  | -0.2824 | 0.1479  | 0.2029  | 0.4207  | 0.4306  | 0.0881  | -0.1389 | 0.105   |
| PY00597 | -0.076  | 0.154   | -0.3974 | 0.3405  | 0.2212  | -0.0403 | -0.3347 | 0.2945  | -0.4951 | 0.2901  | 0.275   | -0.441  |
| PY02858 | 0.0538  | 0.1562  | 0.0187  | 0.7077  | 0.9472  | 0.096   | 0.1381  | -0.1947 | -0.1527 | 0.3711  | 0.1656  | -0.1064 |
| PY03630 | -0.3679 | -0.5139 | -0.2383 | 0.076   | 1.3009  | 0.0649  | 0.0577  | 0.3009  | 0.407   | 0.3688  | 1.3648  | 0.1501  |
| PY01132 | 0.122   | -0.1758 | -0.1005 | 0.7399  | 0.1694  | 0.2801  | 0.2266  | 0.1937  | -0.1054 | 0.2559  | -0.0824 | -1.556  |
| PY02035 | 0.1218  | 0.1768  | -0.0319 | 0.2359  | 0.3287  | 0.1721  | 0.2186  | -0.0805 | -0.1454 | -0.1367 | 0.0079  | -0.0696 |
| PY04630 | 0.0256  | 0.3802  | 0.1994  | -0.2614 | 0.2063  | -0.06   | 0.0572  | 0.0351  | -0.0717 | 0.2686  | -0.195  | -0.2007 |
| PY01148 | 0.5524  | 0.1377  | -0.2404 | 0.3999  | 0.2661  | 0.0622  | 0.2919  | 0.1462  | -0.3705 | 0.4986  | 0.4606  | -0.0245 |
| PY06816 | -0.091  | 0.0529  | 0.3605  | -0.1603 | 0.155   | 0.0549  | 0.2101  | 0.0823  | 0.8145  | 0.1816  | 0.2443  | 0.4555  |
| PY07647 | -0.0192 | -0.0266 | -0.4546 | 0.3235  | 0.3137  | 0.0886  | -0.1296 | -0.0662 | -0.0823 | 0.2163  | 0.0256  | 0.011   |

|         |         |         |         |         |         |         |         |         |         |         |         |         |
|---------|---------|---------|---------|---------|---------|---------|---------|---------|---------|---------|---------|---------|
| PY00510 | -1.4716 | -0.7945 | -0.4764 | -0.8482 | -0.4144 | -0.462  | -0.2623 | -0.078  | 0.3966  | 0.0419  | 0.4528  | -0.0487 |
| PY02201 | 0.0693  | -0.0539 | 0.0262  | -0.0337 | -0.3915 | -0.5188 | -0.1174 | -0.106  | -0.1376 | -0.4458 | -0.2587 | -0.6863 |
| PY07277 | 0.2572  | 0.3371  | 0.1611  | 0.0178  | -0.0821 | -0.1751 | -0.1703 | -0.6084 | -0.1439 | -0.5532 | -0.4959 | -0.1083 |
| PY04262 | 0.3368  | -0.033  | 0.0854  | 0.406   | -0.4907 | -0.0381 | 0.1595  | 0.212   | 0.1988  | 1.1529  | 0.3329  | 0.048   |
| PY01139 | 0.304   | 0.2788  | 0.3192  | -0.538  | -0.8543 | -0.1852 | 0.2129  | -0.5872 | 0.1736  | -0.682  | 0.8771  | 0.2422  |
| PY00902 | 0.0432  | -0.5799 | 0.0623  | 1.526   | 1.1364  | 1.0529  | 0.2754  | 1.0881  | 0.1671  | 1.4188  | 0.8937  | 0.2546  |
| PY00440 | -0.1629 | -1.1504 | 0.3474  | 0.3743  | 0.4544  | 0.0145  | -0.5829 | 0.1854  | 0.0944  | 0.5561  | 0.3764  | 0.1264  |
| PY03769 | 0.3186  | 0.5685  | 0.4959  | -0.3352 | 0.0499  | -0.1504 | 0.0295  | -0.1177 | 0.3343  | -0.4215 | 0.1112  | -0.346  |
| PY01656 | -1.0254 | -0.3071 | 0.042   | -0.0914 | 0.1045  | -0.1827 | -0.2301 | 0.1413  | -0.0824 | 0.1191  | 0.3125  | -0.1378 |
| PY06042 | -0.1236 | -0.1734 | -0.1143 | 0.0618  | 0.2056  | -0.0213 | -0.1651 | 0.0706  | -0.4329 | -0.0014 | -0.1227 | -0.7374 |
| PY02027 | 0.0241  | 0.3749  | 0.1595  | -0.1857 | 0.0553  | 0.1003  | 0.5581  | -0.0596 | 0.2522  | -0.2269 | -0.0775 | 0.7717  |
| PY00349 | 0.1851  | 0.0216  | -0.6164 | 0.68    | 0.2475  | 0.0717  | -0.3637 | 0.2164  | -0.9063 | 0.8676  | 0.0858  | -0.1353 |
| PY02085 | -0.2286 | -0.1296 | -0.254  | -0.5937 | 0.1702  | 0.2028  | 0.0597  | -0.2603 | -0.1085 | -0.3517 | -0.2934 | -0.1859 |
| PY02850 | 0.2313  | 0.0352  | -0.0874 | 0.0947  | 0.6953  | 0.6813  | 0.3884  | 0.4853  | 0.2279  | -0.3096 | 0.1774  | -0.209  |
| PY02091 | 0.3505  | 0.4076  | 0.199   | 0.2894  | 0.0222  | 0.1507  | -0.1013 | -0.0452 | -0.0183 | 0.1964  | -0.2692 | -0.0376 |
| PY02596 | 0.3893  | 0.8738  | -0.0642 | 0.2144  | -0.1228 | -0.1575 | 0.3379  | 0.212   | 0.1473  | -0.2702 | -0.0474 | 0.0847  |
| PY06662 | 0.2837  | -0.0179 | -0.1652 | -0.0561 | 0.0369  | -0.187  | -0.0974 | -0.2239 | -0.2037 | 0.0467  | 0.1081  | -0.0624 |
| PY02833 | 0.0971  | 0.1011  | 0.3911  | 0.1336  | 0.0681  | 0.0459  | 0.2563  | -0.2444 | 0.2146  | -0.3054 | -0.2756 | 0.2512  |
| PY02819 | 0.0844  | 0.1478  | 0.3287  | -0.165  | 0.0187  | 0.0946  | 0.2017  | -0.0695 | -0.0296 | 0.0544  | -0.0354 | -0.1058 |
| PY00881 | -0.1864 | -0.4846 | -0.0723 | 0.1516  | 0.7303  | 0.0268  | -0.354  | -0.187  | -0.7188 | -0.1014 | -0.1509 | 0.0337  |
| PY04587 | 0.2056  | 0.1944  | -0.1729 | -0.338  | 0.0334  | 0.1026  | 0.0223  | -0.1785 | 0.0581  | -0.3247 | 0.1696  | -0.1315 |
| PY02047 | -1.7178 | -0.8242 | -1.0405 | -0.1704 | -0.0253 | -0.5711 | -0.1051 | 0.4442  | 0.4841  | 0.8035  | 1.0498  | -0.1525 |
| PY05093 | -0.1101 | -0.0718 | -0.1461 | -0.7854 | -0.2219 | 0.1832  | -0.0976 | -0.1994 | 0.1458  | -0.4018 | -0.0381 | 0.0834  |
| PY02674 | 0.456   | 0.2788  | 0.2689  | 0.1841  | -0.1832 | 0.167   | -0.0577 | -0.4839 | -0.1423 | -0.5    | -0.7636 | -0.0993 |
| PY00899 | -0.2624 | -0.2727 | -0.2921 | -0.2473 | 0.9065  | -0.2405 | -0.3217 | -0.073  | -0.7908 | -0.2461 | -0.3117 | -0.4387 |
| PY05137 | 0.241   | -0.0919 | -0.1772 | -0.4398 | -0.5178 | -0.0917 | -0.1612 | -0.2041 | -0.2448 | -0.0513 | -0.1183 | 0.1201  |
| PY06858 | 0.119   | -0.0611 | -0.4438 | -0.2554 | 0.2497  | -0.1775 | -0.1979 | -0.262  | -0.2152 | -0.324  | -0.2262 | -0.0367 |
| PY06801 | -0.0282 | -0.0611 | 0.0829  | 1.2207  | 0.2377  | 0.7743  | -0.1625 | -0.2773 | -0.5319 | -0.298  | 1.3663  | 0.0748  |
| PY02170 | 0.7566  | 0.1384  | -0.2228 | 0.2508  | -0.137  | -0.0338 | -0.0771 | 0.0269  | -0.0243 | -0.2794 | -0.548  | 0.1351  |
| PY07655 | 0.056   | -0.1536 | -0.3787 | -0.0587 | -0.0944 | -0.1354 | -0.1696 | 0.0136  | 0.1436  | 0.1868  | -0.0913 | 0.042   |
| PY04956 | -0.1857 | 0.1482  | -0.1964 | -0.1798 | 0.3174  | 0.0981  | 0.0579  | -0.1021 | -0.2166 | -0.538  | -0.3272 | -0.2243 |
| PY00879 | -0.0509 | -0.0842 | -0.0354 | 0.5729  | 0.5254  | 1.2193  | 0.0537  | 0.5177  | 0.3026  | 0.3851  | 0.6854  | 0.4164  |
| PY03071 | -0.0399 | 0.2968  | 0.1177  | -0.292  | 0.0114  | -0.2316 | -0.2457 | -0.1378 | 0.1399  | -0.4097 | -0.0093 | -0.1572 |
| PY02108 | -0.5082 | 0.0887  | 0.0994  | -0.26   | -0.1346 | 0.2299  | 0.0837  | 0.2367  | 0.3027  | -0.3746 | 0.0829  | -0.3599 |
| PY04091 | 0.7646  | 0.2556  | 0.2571  | -0.0106 | -0.1939 | 0.034   | 0.1228  | -0.475  | -0.132  | -0.2981 | -1.025  | -0.3557 |
| PY06603 | -1.3971 | -0.0549 | 0.0893  | -1.1011 | -1.3004 | -0.2905 | -0.3595 | -0.1445 | -0.017  | 0.0615  | 0.5422  | -0.3783 |
| PY01086 | -0.0034 | 0.171   | 0.2052  | -0.1755 | -0.5799 | 0.2142  | 0.5542  | 0.1969  | 0.487   | 0.0819  | -0.2848 | 0.3831  |
| PY07214 | 1.3008  | 0.7256  | 0.2595  | 0.1798  | -0.1409 | -0.3829 | -0.3595 | -0.4017 | -0.2665 | -0.2371 | -0.5695 | -0.0303 |
| PY04286 | -0.8322 | -0.3457 | -0.1167 | -0.6782 | -0.6057 | -0.0059 | 0.2627  | 0.5494  | 0.461   | 0.1498  | 0.5984  | 0.1248  |
| PY01804 | -1.1303 | -0.4698 | -0.3059 | -0.6471 | 0.3428  | 0.1642  | 0.1758  | 0.1524  | 0.1011  | -0.3379 | 0.434   | 0.2563  |
| PY02431 | -0.0227 | -0.2183 | 0.0788  | 0.1069  | 0.2212  | 0.1348  | 0.0135  | 0.0767  | -0.1763 | -0.1074 | 0.0417  | -0.3507 |
| PY05957 | -0.3893 | 0.3429  | 0.8784  | -0.0184 | -0.0653 | -0.0225 | -0.4498 | -0.4186 | 0.0116  | -0.2371 | -0.4524 | -0.2107 |
| PY03445 | 0.3134  | 0.0417  | 0.1417  | -0.2408 | -0.1747 | 0.0862  | 0.4657  | 0.1116  | 0.4801  | 0.4527  | 0.1721  | 0.5497  |
| PY03260 | -0.8287 | -0.1656 | -0.2571 | -0.7215 | 0.0299  | -0.0539 | 0.081   | -0.117  | 0.1194  | 0.1003  | 0.2287  | -0.2585 |
| PY04756 | 0.8591  | 0.5936  | 0.6287  | 0.019   | -0.2533 | -0.0759 | 0.0276  | -0.4987 | -0.1417 | -0.951  | -1.0058 | -0.2586 |
| PY05971 | -0.1238 | 0.2247  | 0.2746  | 0.0361  | -0.0126 | 0.0395  | 0.1973  | 0.1452  | 0.236   | 0.1672  | -0.0825 | 0.1364  |
| PY00124 | 0.0544  | 0.0335  | 0.0555  | -0.2831 | -0.2463 | 0.4043  | 0.2722  | -0.0996 | 0.1504  | -0.2233 | -0.047  | -0.1098 |
| PY02378 | 0.3293  | 0.1249  | -0.1037 | 0.5037  | 0.1345  | -0.1922 | -0.2646 | -0.0011 | -0.2625 | -0.2667 | -0.1191 | -0.2993 |
| PY05485 | -0.3111 | 0.0796  | 0.2649  | -0.5214 | -0.5471 | -0.1634 | -0.6951 | 0.3014  | 0.4977  | -0.1333 | -0.28   | -0.1065 |
| PY02392 | -1.487  | -0.539  | -0.2689 | -1.1711 | -0.6336 | -0.1158 | 0.2163  | 0.9862  | 0.354   | 0.442   | 1.2209  | -0.074  |
| PY00900 | -0.0464 | 0.062   | 0.1757  | -2.0566 | -0.67   | -0.0779 | 0.0849  | -1.1267 | -0.038  | -1.7862 | -0.6133 | 0.1939  |
| PY02187 | 0.5863  | 0.1096  | 0.2279  | 1.0936  | 0.5595  | 0.1025  | 0.0334  | 0.2564  | -0.2115 | 0.4374  | 0.6559  | 0.0004  |
| PY01135 | -0.6447 | -0.4589 | -0.0504 | -0.2589 | -0.2457 | -0.1927 | -0.0307 | -0.055  | 0.1448  | -0.5681 | 0.1063  | -0.4334 |
| PY03106 | 0.3181  | -0.0693 | -0.4756 | 0.3381  | 0.4139  | 0.064   | -0.1536 | -0.1526 | -0.3278 | -0.0254 | -0.1    | -0.1094 |
| PY02765 | -0.0774 | -0.001  | -0.1825 | -0.1175 | 0.2583  | -0.1047 | -0.1778 | -0.1246 | -0.1606 | 0.3459  | 0.0986  | 0.2058  |
| PY03546 | -0.1106 | 0.1717  | 0.2967  | -0.6034 | -0.2991 | -0.0917 | -0.0533 | -0.2123 | -0.0587 | -0.4449 | -0.5097 | -0.0873 |
| PY06673 | -2.0956 | -0.3991 | -0.1292 | -1.1742 | -0.9717 | -0.2482 | 0.0408  | 0.6975  | 0.211   | -0.2929 | 0.8356  | -0.8934 |
| PY03276 | 0.0376  | -0.4498 | -0.3301 | -0.0182 | 0.0969  | -0.0908 | 0.1075  | 0.1464  | 0.3331  | -0.3332 | 0.1834  | 0.2195  |
| PY06158 | 0.9974  | 0.307   | 0.4649  | 0.3202  | -0.1455 | -0.0109 | 0.0623  | -0.4393 | 0.0816  | -0.2525 | -0.6078 | 0.0371  |
| PY03305 | -0.219  | -0.0514 | -0.0109 | 0.893   | -0.0836 | -0.3021 | -0.1848 | 0.5863  | -0.0528 | 0.2155  | 0.098   | -0.3917 |
| PY00243 | -0.0745 | -0.1271 | -0.1237 | -0.1093 | 0.2086  | -0.0407 | -0.5565 | -0.1109 | -0.3013 | 0.0125  | 0.1933  | -0.2078 |
| PY00647 | 0.1104  | -0.201  | -0.3673 | -0.3018 | 0.001   | -0.09   | 0.0311  | -0.0319 | -0.2245 | 0.2235  | 0.0215  | 0.2223  |
| PY03995 | -0.0309 | -0.0717 | 0.0639  | -0.0044 | -0.0713 | 0.0182  | 0.0085  | 0.043   | 0.1922  | 0.3126  | -0.1493 | -0.0164 |

|         |         |         |         |         |         |         |         |         |         |         |         |         |
|---------|---------|---------|---------|---------|---------|---------|---------|---------|---------|---------|---------|---------|
| PY06978 | -0.1356 | -0.0894 | 0.3953  | -0.7778 | -0.206  | -0.2382 | -0.1672 | 0.1412  | 0.3736  | -0.0005 | 0.3985  | 0.3929  |
| PY04390 | 0.2422  | 0.4065  | 0.6811  | -0.3607 | -0.6781 | 0.1776  | 0.6959  | 0.4058  | 0.6699  | 0.3179  | -0.3414 | 0.8054  |
| PY07329 | 0.1021  | -0.1682 | 0.0048  | 0.1195  | 0.3438  | 0.3797  | 0.1297  | 0.2598  | -0.0855 | 0.0894  | 0.4567  | -0.1103 |
| PY02458 | 0.9297  | 0.3214  | 0.2181  | 0.7595  | 0.0341  | 0.0477  | 0.1906  | -0.1169 | 0.3829  | 0.4852  | -0.6782 | 0.3288  |
| PY01582 | -0.061  | 0.4947  | -0.1868 | 0.0031  | 0.09    | 0.0468  | 0.0612  | 0.1123  | 0.3963  | -0.0033 | 0.4814  | -0.181  |
| PY04347 | 0.2236  | -0.0135 | -0.1066 | 0.705   | 0.0807  | -0.1666 | -0.1683 | -0.0982 | -0.064  | -0.0997 | -0.1196 | -0.2866 |
| PY05453 | -0.0447 | -0.1627 | -0.0117 | -0.7754 | -0.225  | 0.0187  | -0.0979 | -0.1851 | -0.0522 | -0.6057 | 0.0545  | 0.2314  |
| PY05214 | -0.3008 | -0.1085 | 0.2108  | -0.0955 | 0.1811  | -0.0024 | 0.221   | -0.1586 | -0.4315 | -0.297  | 0.087   | -0.4007 |
| PY05378 | -0.2869 | -0.0279 | 0.2182  | 0.0686  | 0.1977  | 0.0194  | 0.1233  | 0.1851  | 0.0775  | 0.4016  | -0.0583 | 0.1983  |
| PY00270 | -0.1415 | -0.1263 | -0.3523 | 0.0107  | -0.0199 | -0.2146 | -0.3082 | -0.0013 | -0.1119 | 0.1316  | 0.0836  | -0.2587 |
| PY00202 | -0.9715 | -0.3414 | -0.2725 | -0.2778 | -0.2772 | 0.0434  | 0.0568  | 0.2594  | 0.1727  | -0.4397 | 0.2764  | -0.8346 |
| PY06813 | 0.4153  | 0.2843  | 0.4923  | 0.396   | -0.1663 | 0.0968  | 0.2777  | -0.0363 | -0.27   | -0.0955 | -0.5658 | -0.0771 |
| PY05918 | -0.0295 | -0.045  | 0.5752  | 0.1984  | -0.0043 | -0.2155 | 0.1361  | 0.4367  | -0.1096 | 0.5365  | 0.9318  | 0.0805  |
| PY02955 | -0.4287 | -0.33   | -0.4953 | -0.4585 | 0.1132  | -0.0269 | 0.0832  | 0.6161  | 0.1167  | 0.1203  | 0.5432  | -0.2378 |
| PY02939 | -0.46   | -0.2611 | -0.1631 | -0.6997 | 0.9743  | 0.15    | 0.1994  | -0.0222 | -0.2339 | -0.3893 | 0.0554  | 0       |
| PY00603 | 0.5477  | 0.1327  | -0.4996 | 0.4716  | -0.4388 | -0.4096 | -0.77   | -0.0783 | -0.57   | 0.4986  | -0.1477 | -0.4572 |
| PY03672 | 0.0369  | 0.1221  | 0.2241  | -0.467  | 0.5408  | -0.204  | -0.4046 | -0.5786 | -0.5477 | -0.1419 | -0.4646 | -0.1997 |
| PY06194 | -0.051  | 0.2188  | 0.5708  | -0.0101 | 0.2493  | -0.0544 | -0.2443 | -0.0712 | -0.1068 | 0.2908  | 0.9792  | -0.2763 |
| PY04448 | -0.5638 | 0.0512  | -0.0464 | 0.1178  | 0.131   | 0.1174  | -0.0418 | 0.0719  | -0.0567 | -0.0343 | 0.0995  | -0.1653 |
| PY06812 | 0.0411  | 0.0007  | -0.1588 | -0.4049 | -0.2363 | -0.1029 | -0.1614 | -0.0107 | -0.1411 | -0.0921 | -0.1747 | -0.0549 |
| PY01431 | -0.5591 | -0.027  | -0.1911 | -0.7528 | -0.3526 | -0.2064 | 0.0864  | -0.0749 | 0.0175  | -0.219  | 0.1675  | -0.0193 |
| PY05263 | -0.0576 | 0.1137  | -0.3015 | -0.6068 | -0.159  | -0.5974 | -0.1014 | 0.1081  | 0.0192  | -0.0459 | 0.4921  | -0.0739 |
| PY03902 | -0.6013 | -0.1453 | -0.0197 | -0.2902 | 0.2559  | -0.0907 | -0.2527 | -0.0453 | -0.3167 | 0.0436  | 0.0836  | -0.3562 |
| PY05153 | -0.2901 | -0.1937 | -0.223  | 0.4622  | 0.348   | -0.0712 | -0.0128 | 0.1712  | -0.1616 | -0.2372 | 0.1469  | 0.0529  |
| PY05209 | 0.9459  | 0.4347  | 0.2258  | -0.3996 | -0.1372 | 0.0246  | -0.0144 | -0.4042 | -0.3407 | -0.241  | -0.9442 | 0.2773  |
| PY07167 | -0.7887 | 0.094   | 0.485   | 0.2249  | -0.1218 | -0.108  | -0.1724 | 0.2379  | 0.0724  | 0.1372  | 0.4618  | 0.0802  |
| PY01578 | -0.0492 | -0.521  | -0.4263 | -0.0292 | 0.265   | 0.1587  | 0.1555  | -0.0165 | -0.1493 | -0.0308 | 0.5664  | 0.0396  |
| PY00728 | -0.8304 | -0.317  | -0.1274 | -0.0592 | -0.3307 | -0.3341 | -0.157  | 0.305   | 0.3683  | -1.1193 | 0.4006  | -0.2151 |
| PY03793 | -0.3221 | -0.3961 | -0.4967 | -0.093  | 0.0184  | 0.2408  | 0.2019  | 0.222   | 0.0597  | 0.5767  | 0.3428  | 0.5444  |
| PY03248 | -0.0277 | 0.033   | -0.1536 | -0.3806 | -0.1262 | 0.0744  | 0.246   | -0.0181 | -0.1943 | -0.1631 | -0.2236 | 0.3233  |
| PY00321 | -0.8588 | -0.1582 | 0.1963  | 0.2938  | 0.2213  | 0.0113  | -0.083  | -0.0818 | 0.0924  | 0.1747  | 0.3732  | -0.07   |
| PY05490 | 0.2903  | 0.173   | -0.0926 | -0.3677 | -0.4596 | -0.038  | 0.0704  | -0.1392 | 0.0241  | -0.6242 | -0.4448 | -0.0849 |
| PY01437 | -0.8897 | -0.2566 | 0.118   | -0.1411 | 0.2868  | 0.0135  | -0.1972 | -0.0612 | -0.1957 | -0.2298 | -0.1784 | -0.0723 |
| PY00794 | 0.0389  | -0.0805 | -0.0091 | 0.0223  | -0.2209 | 0.0637  | -0.102  | 0.1013  | 0.0732  | 0.3147  | 0.0002  | 0.0033  |
| PY04477 | 0.7277  | 0.4278  | 0.2517  | -0.2235 | -0.5619 | 0.0578  | -0.1181 | -0.2339 | -0.4983 | -0.2429 | -0.1459 | -0.0964 |
| PY01040 | -0.9143 | -0.483  | -0.4528 | 0.0101  | -0.2512 | 0.1092  | 0.1525  | 0.6619  | 0.2363  | -0.6012 | 0.2919  | -0.0862 |
| PY03868 | -1.0168 | -0.4408 | -0.6085 | -0.0114 | -0.2974 | 0.0366  | 0.0336  | 0.4917  | 0.2149  | 0.2973  | 0.0378  | -0.2327 |
| PY00170 | 0.5136  | 0.1973  | 0.0427  | 0.1375  | -0.0618 | -0.2553 | -0.1262 | -0.2656 | -0.0625 | -0.0766 | -0.3677 | 0.3708  |
| PY00533 | 0.2575  | 0.1206  | 0.0421  | 0.8292  | 0.3517  | 0.7009  | 0.4559  | 0.1494  | 0.0128  | 0.0076  | -0.3827 | -0.0179 |
| PY01012 | -0.5578 | -0.1648 | 0.0455  | 0.5083  | 0.0553  | -0.0567 | 0.0712  | 0.3782  | 0.0759  | 0.9634  | 0.6016  | 0.2579  |
| PY06931 | 0.0963  | -0.0573 | -0.095  | -0.1185 | 0.6978  | -0.1459 | -0.0185 | -0.0987 | -1.7006 | -0.1819 | 0.1608  | -0.0128 |
| PY03289 | 0.9249  | 0.438   | 0.6358  | -0.1481 | -0.768  | 0.1231  | 0.6131  | -0.1935 | 0.3865  | 0.1296  | -0.997  | 0.2863  |
| PY06826 | -0.5295 | 0.1447  | 0.208   | -0.546  | -0.4257 | 0.0543  | 0.097   | 0.1948  | 0.1803  | -0.0354 | 0.4249  | -0.4242 |
| PY07458 | -0.4466 | -0.5992 | -0.5778 | -0.3039 | 0.0899  | 0.0677  | 0.0516  | 0.253   | 0.1119  | -0.0395 | 0.2059  | -0.0325 |
| PY06120 | -0.4197 | -0.1489 | -0.0395 | -0.3209 | -0.3561 | -0.4696 | -0.2159 | -0.2717 | -0.0412 | -0.19   | -0.0015 | -0.419  |
| PY04294 | 1.2708  | 0.111   | 0.0376  | -0.7107 | 0.0297  | -0.386  | -0.0678 | -0.772  | -0.116  | -1.1667 | -0.4122 | 0.2401  |
| PY02374 | 0.0489  | -0.0766 | 0.0776  | 0.4708  | 0.43    | 0.2627  | -0.1891 | -0.0285 | -0.2274 | -0.2947 | -0.5455 | -0.5141 |
| PY06957 | -0.3653 | -0.0286 | -0.214  | -0.0553 | -0.066  | -0.2122 | -0.1446 | 0.1486  | 0.0929  | 0.1971  | 0.0643  | -0.0096 |
| PY00045 | -0.0325 | -0.5529 | -0.1394 | 0.5659  | 0.1981  | 0.0965  | -0.1524 | -0.097  | -0.2164 | -0.2796 | -0.1902 | -0.497  |
| PY02217 | -0.6237 | -0.334  | -0.0762 | 0.4636  | 0.6231  | 0.1717  | 0.0123  | -0.0591 | 0.0226  | 0.5285  | 0.9926  | -0.1153 |
| PY04720 | -0.1313 | -0.2623 | -0.2334 | -0.3954 | -0.1822 | -0.1687 | -0.5702 | 0.0059  | -0.2508 | 0.5448  | -0.0633 | -0.2891 |
| PY00542 | -1.4067 | -0.1211 | 0.1153  | -0.6153 | -0.1752 | -0.0849 | -0.0816 | 0.0984  | 0.0344  | 0.2061  | 0.5238  | -0.0881 |
| PY05249 | 0.494   | 0.1209  | 0.1325  | 0.3375  | 0.2212  | 0.1037  | -0.0349 | -0.0799 | -0.1399 | -0.1929 | -0.3932 | 0.1311  |
| PY05984 | 0.992   | 0.5091  | 0.3232  | -0.0383 | -0.2658 | -0.1267 | -0.091  | -0.3368 | -0.2416 | -0.2048 | -0.4322 | 0.0942  |
| PY06105 | -0.1608 | 0.0039  | 0.0042  | -0.5858 | -0.167  | -0.0687 | -0.0104 | -0.1751 | -0.022  | -0.4305 | -0.1268 | -0.0536 |
| PY02785 | -0.2965 | -0.2035 | 0.0241  | -0.0477 | -0.2239 | -0.2762 | 0.0483  | 0.4863  | 0.0681  | -0.0379 | 0.6459  | -0.2423 |
| PY02972 | 0.3945  | 0.1525  | -0.0458 | 0.2476  | 0.0822  | -0.1028 | -0.0675 | 0.0544  | -0.0451 | 0.4415  | 0.0024  | -0.3586 |
| PY07202 | 0.7364  | 0.277   | 0.099   | 0.3824  | 0.0912  | 0.164   | 0.0221  | -0.0897 | -0.023  | -0.1489 | -0.6165 | 0.0106  |
| PY04394 | -0.2752 | 0.0158  | 0.1415  | 0.109   | -0.0055 | 0.5361  | 0.0381  | 0.0622  | -0.1184 | -0.2199 | -0.1243 | -0.456  |
| PY06658 | 0.2398  | -0.3287 | -0.0622 | 1.3737  | 0.0836  | -0.0444 | -0.0356 | 0.6981  | -0.0398 | -0.061  | 0.0607  | -0.2142 |
| PY04575 | 0.5165  | 0.3984  | 0.4816  | 0.5036  | -0.6213 | -0.1408 | -0.1305 | -0.0449 | -0.1213 | 0.0464  | -0.572  | -0.0094 |
| PY03314 | 0.9203  | 0.5376  | -0.025  | -0.6869 | 0.225   | -0.0233 | -0.1609 | -0.189  | -0.5167 | -0.7055 | -0.345  | -0.7242 |
| PY00115 | -0.2421 | 0.0465  | -0.5602 | -0.2834 | -0.2208 | 0.1248  | -0.2009 | -0.1144 | -0.1558 | 0.5194  | -0.528  | -0.3742 |

|         |         |         |         |         |         |         |         |         |         |         |         |         |
|---------|---------|---------|---------|---------|---------|---------|---------|---------|---------|---------|---------|---------|
| PY03969 | 0.6911  | 0.2742  | 0.1374  | -0.0281 | -0.1378 | -0.0894 | 0.0089  | -0.1478 | -0.1612 | -0.122  | 0.2289  | 0.044   |
| PY06856 | -0.3808 | -0.0848 | -0.0195 | -0.8093 | -0.4255 | -0.2568 | -0.2579 | 0.1778  | 0.0826  | 0.0341  | 0.7565  | 0       |
| PY07251 | -0.5647 | -0.027  | -0.2213 | -0.1869 | -0.5381 | -0.6782 | -0.3798 | 0.046   | -0.162  | 0.0453  | -0.2078 | -0.4122 |
| PY00076 | -0.0806 | -1.6088 | -0.517  | 0.6309  | 0.511   | 0.1572  | -0.3862 | 0.4498  | -0.7869 | 0.5483  | 0.3648  | -1.0526 |
| PY07468 | -0.4866 | -0.1577 | -0.0669 | -0.1501 | 0.1291  | -0.075  | -0.288  | -0.0849 | -0.2421 | 0.2564  | 0.1686  | -0.1333 |
| PY07525 | -0.2892 | 0.2016  | -0.1718 | 0.5603  | -0.2285 | 0.1502  | 0.2175  | 0.4534  | 0.3299  | -0.3073 | 0.2669  | 0.1805  |
| PY01241 | -0.1321 | -0.0066 | 0.2329  | -0.4035 | -0.2334 | 0.2229  | 0.263   | 0.0092  | 0.246   | 0.068   | 0.1268  | 0.15    |
| PY06883 | -0.4518 | -0.1128 | -0.0421 | -0.2988 | -0.0939 | -0.057  | -0.0131 | 0.0473  | 0.0916  | 0.389   | 0.0981  | 0.1546  |
| PY02482 | 0.2489  | 0.0641  | 0.0281  | 0.7016  | 0.6588  | 0.3242  | 0.1076  | -0.0185 | -0.1217 | -0.1059 | -0.6691 | 0.0534  |
| PY02396 | 0.2422  | 0.2053  | -0.0827 | 0.3579  | -0.0908 | -0.1366 | -0.0465 | 0.3102  | 0.2455  | 0.0579  | 0.2142  | -0.1806 |
| PY01795 | -0.0184 | -0.1688 | -0.1623 | 0.3612  | 0.6144  | 0.1551  | -0.1334 | 0.0594  | -0.2982 | -0.4078 | 0.0779  | -0.3362 |
| PY05864 | 0.3939  | 0.1296  | 0.3796  | -0.2645 | -0.3112 | 0.1699  | 0.3113  | 0.0625  | 0.076   | 0.1231  | -0.566  | 0.2635  |
| PY02795 | 1.2382  | 0.3709  | 0.5279  | 0.4304  | -0.3856 | -0.2888 | -0.0871 | -0.3921 | -0.2949 | -0.5239 | -1.1184 | -0.1197 |
| PY01284 | 0.4669  | 0.3271  | 0.2323  | 0.0026  | -0.1721 | -0.1584 | 0.1122  | -0.212  | -0.2562 | -0.0207 | -0.3719 | -0.0402 |
| PY04048 | -0.0657 | 0.1443  | -0.4145 | -0.3208 | 0.0189  | 0.0177  | -0.1198 | -0.173  | -0.2524 | -0.0691 | -0.4693 | -0.113  |
| PY06470 | 0.3691  | 0.1002  | 0.1826  | 0.0175  | 0.8648  | 0.0133  | 0.1768  | -0.4568 | 0.0848  | 0.2326  | 0.2695  | 0.3657  |
| PY04019 | 0.6687  | 0.2136  | 0.1913  | 0.1994  | 0.3528  | -0.0076 | 0.082   | 0.1745  | 0.0767  | -0.2191 | 0.0279  | 0.4896  |
| PY04616 | -0.3259 | -0.0805 | 0.3249  | -0.3804 | 0.2652  | 0.1955  | 0.0247  | -0.1562 | -0.0759 | -0.4451 | -0.0405 | -0.0773 |
| PY00784 | 0.1098  | -0.1535 | 0.0781  | 0.0564  | -0.0133 | 0.0887  | 0.0663  | 0.1731  | -0.0209 | -0.0449 | -0.1913 | -0.055  |
| PY03633 | 0.3518  | 0.1151  | -0.2417 | -0.2064 | -0.1474 | 0.1495  | 0.1667  | -0.1254 | 0.0158  | -0.2973 | -0.3119 | 0.1908  |
| PY05841 | -0.5506 | 0.0659  | 0.0372  | 0.4184  | -0.1658 | -0.0161 | -0.2173 | 0.2108  | -0.0267 | 0.2135  | 0.5659  | -0.1645 |
| PY05391 | 0.0068  | -0.0868 | -0.0778 | 0.1085  | 0.3011  | -0.2914 | 0.2346  | 0.4595  | 0.24    | 0.2676  | 0.4205  | 0.3532  |
| PY04367 | -0.6429 | -0.0941 | 0.1382  | 0.0498  | 0.1071  | -0.1741 | -0.0359 | 0.1104  | 0.1547  | -0.2123 | 0.4494  | -0.359  |
| PY04778 | 0.292   | 0.4329  | 0.5752  | 0.01    | -0.0952 | 0.3354  | 0.2581  | -0.1105 | 0.1229  | -0.2971 | 0.1027  | 0.1846  |
| PY03114 | -0.1328 | 0.0242  | -0.9014 | -0.581  | 0.3174  | 0.194   | -0.2222 | -0.0297 | -0.0753 | -0.1812 | -0.3938 | -0.2889 |
| PY01617 | -0.1705 | -0.4018 | -0.4344 | 0.2237  | 0.3151  | 0.0194  | 0.0018  | 0.1412  | -0.0819 | -0.0282 | 0.5636  | -0.0563 |
| PY05202 | 0.0369  | 0.1057  | 0.098   | -0.1195 | -0.1931 | 0.1264  | 0.199   | -0.1446 | 0.1328  | -0.1847 | -0.6261 | 0.1515  |
| PY01426 | 0.4528  | 0.0234  | 0.5806  | 0.2079  | -0.6386 | 0.0337  | -0.1932 | -0.6518 | -0.2505 | -0.4818 | -0.9534 | -0.1351 |
| PY02219 | -0.0753 | -0.5726 | -0.6753 | 0.1999  | 0.63    | -0.2664 | -0.4342 | -0.2449 | -0.1699 | -0.3023 | 0.0976  | 0.0147  |
| PY06293 | 0.0223  | 0.0613  | -0.0194 | 0.3883  | 0.148   | 0.1464  | -0.1021 | 0.0801  | -0.0673 | -0.087  | 0.2544  | 0.029   |
| PY07318 | -0.4753 | -0.2609 | -0.0635 | -0.3535 | -0.7432 | -0.2808 | 0.0453  | 0.0324  | 0.511   | -0.0036 | -0.8771 | 0.2918  |
| PY01531 | 0.1795  | -0.2034 | -0.4684 | -0.2531 | -0.2516 | -0.2639 | -0.2324 | 0.042   | 0.0633  | -0.0401 | 0.429   | 0.0522  |
| PY00340 | 0.9541  | 0.4851  | 0.9787  | 0.2448  | -0.1629 | 0.3127  | 0.5376  | 0.111   | 0.4765  | 0.0767  | -0.3814 | 0.38    |
| PY02478 | -0.5578 | -0.0466 | 0.2634  | -0.2432 | 0.0309  | 0.1939  | -0.0472 | 0.129   | 0.1781  | 0.1593  | 0.5922  | -0.0649 |
| PY03034 | -0.1228 | 0.0122  | -0.5899 | 0.234   | 0.3214  | 0.2413  | -0.269  | -0.0487 | -0.1834 | 0.0389  | -0.3277 | -0.3817 |
| PY02755 | -0.3896 | -0.1476 | -0.2724 | -0.3846 | -0.0686 | -0.1568 | 0.3406  | 0.4205  | 0.551   | 0.3961  | 0.7706  | 1.1606  |
| PY01910 | -0.0251 | -0.0406 | 0.0193  | -0.4137 | 0.1039  | 0.2672  | -0.0676 | -0.1241 | -0.0995 | -0.3081 | -0.0975 | 0.1584  |
| PY04946 | -0.1846 | 0.0161  | -0.1864 | 0.2439  | 0.0338  | 0.5632  | 0.1304  | 0.1998  | 0.1538  | 0.2546  | 0.1629  | 0.0741  |
| PY04730 | 0.3264  | -0.1052 | -0.3523 | -0.5302 | -0.103  | -0.3137 | -0.4527 | -0.3216 | -0.2973 | -0.1899 | -0.058  | -0.2917 |
| PY04984 | 1.1136  | 0.5664  | 0.3207  | 0.4122  | -0.2683 | 0.0584  | 0.1747  | -0.3613 | -0.045  | 0.0021  | -0.7963 | 0.1286  |
| PY01504 | 0.2916  | 0.0294  | 0.1099  | -0.6382 | 0.3204  | -0.2082 | 0.0728  | -0.1842 | -0.0549 | -0.5617 | -0.076  | 0.0182  |
| PY01947 | -0.0271 | 0.0942  | 0.287   | -0.201  | -0.2425 | 0.1092  | 0.4306  | 0.3014  | 0.2061  | -0.0485 | -0.2272 | 0.1263  |
| PY00441 | -0.2053 | -0.1881 | 0.2192  | -0.0709 | 0.1762  | -0.3808 | 0.0186  | 0.1627  | 0.1789  | 0.0396  | 0.3979  | -0.3982 |
| PY00586 | -0.3168 | 0.1319  | -0.0442 | 0.0644  | -0.3402 | -0.1457 | -0.2328 | 0.1399  | 0.1191  | 0.1983  | 0.0328  | -0.3695 |
| PY02345 | 0.0267  | 0.1868  | -0.3922 | 0.4786  | 0.2909  | 0.3639  | -0.2148 | 0.5944  | 0.0062  | 0.6852  | 0.7591  | 0.0673  |
| PY03420 | 0.3499  | 0.1011  | 0.0165  | 0.2482  | 0.2543  | 0.2321  | -0.019  | -0.0966 | -0.091  | 0.0683  | 0.1002  | 0.0662  |
| PY01587 | -0.1261 | -0.1068 | -0.1589 | -0.0105 | 0.0503  | -0.4516 | -0.3645 | -0.2065 | -0.1686 | -0.1482 | 0.3017  | -0.1047 |
| PY01714 | -1.1746 | -0.8373 | -0.9877 | 0.5296  | -0.5492 | -0.1107 | -0.0029 | 0.7801  | 0.0927  | 0.3795  | 0.6293  | 0.2071  |
| PY01144 | 0.0685  | -0.0542 | -0.3301 | -0.4307 | 0.076   | -0.166  | -0.0844 | -0.164  | -0.3265 | -0.1888 | -0.0756 | -0.1093 |
| PY01452 | -0.1745 | -0.0215 | 0.0881  | 0.1022  | 0.4054  | -0.0888 | -0.173  | -0.0094 | -0.1126 | 0.4833  | 0.5348  | 0.0725  |
| PY00382 | -0.1088 | -0.1844 | -0.2911 | 0.4656  | 0.2009  | 0.1578  | -0.1065 | -0.0128 | -0.224  | 0.1703  | 0.0198  | -0.3564 |
| PY04252 | -0.4887 | -0.0061 | -0.057  | 0.7147  | -0.0152 | 0.0779  | -0.1696 | -0.0815 | -0.0798 | -0.3128 | -0.3357 | 0.0016  |
| PY00184 | 0.5604  | 0.2173  | -0.1133 | 0.049   | -0.114  | -0.0112 | 0.3278  | -0.0932 | -0.6424 | 0.3351  | -0.3334 | 0.038   |
| PY05228 | -0.2994 | -0.2466 | -0.3061 | 0.2864  | 0.5218  | -0.1526 | 0.0322  | 0.0774  | -0.0489 | 0.085   | 0.1091  | 0.3168  |
| PY02515 | -0.3663 | -0.5089 | -0.1381 | -0.0384 | -0.0068 | 0.0141  | -0.0163 | 0.1035  | 0.0578  | -0.0025 | -0.145  | 0.0993  |
| PY03733 | -0.1316 | -0.1544 | 0.4284  | -0.3631 | -0.2056 | -0.2105 | -0.0222 | -0.2796 | 0.0037  | 0.0033  | -0.2392 | 0.0988  |
| PY01710 | -0.6178 | -0.2423 | -0.0035 | -0.134  | 0.0479  | -0.1154 | -0.0605 | 0.2236  | 0.1446  | 0.3049  | 0.8887  | -0.0615 |
| PY04707 | 0.2432  | 0.4675  | 0.5124  | 0.0873  | -0.1831 | 0.3658  | 0.228   | -0.0744 | 0.3778  | 0.0025  | 0.0177  | 0.2896  |
| PY03392 | -0.4805 | -0.2937 | -0.4273 | 0.8003  | -0.3048 | -0.1847 | -0.0712 | 0.3491  | 0.3566  | 0.6314  | 0.3122  | 0.4839  |
| PY00259 | 0.3565  | 0.0712  | 0.0009  | -0.0767 | 0.3263  | 0.2945  | 0.0466  | -0.2573 | -0.1391 | -0.2255 | -0.0852 | 0.0756  |
| PY06793 | -0.5817 | -0.6095 | -0.8615 | -0.0795 | 0.1184  | 0.1038  | -0.2508 | 0.2567  | -0.0496 | 0.432   | 0.3055  | 0.2431  |
| PY05785 | 0.36    | 0.1492  | 0.2608  | 0.8882  | 0.6411  | 0.559   | 0.1557  | 0.1284  | -0.1465 | 0.3108  | 0.1101  | -0.0144 |
| PY02350 | -0.1845 | -0.1761 | -0.0039 | -0.4021 | -0.1477 | -0.3185 | 0.0277  | 0.0436  | 0.0286  | 0.387   | 0.8556  | 0.1145  |

|         |         |         |         |         |         |         |         |         |         |         |         |         |
|---------|---------|---------|---------|---------|---------|---------|---------|---------|---------|---------|---------|---------|
| PY00640 | 0.1913  | 0.1885  | -0.1412 | -0.0731 | 0.1241  | 0.2155  | 0.1096  | 0.1045  | -0.1219 | 0.0465  | 0.0845  | -0.003  |
| PY01000 | 0.2167  | 0.3168  | 0.2288  | -0.5639 | -0.0518 | -0.0707 | 0.1598  | -0.1774 | 0.1257  | -0.6538 | 0.0004  | 0.3662  |
| PY06049 | 0.4941  | 0.0101  | 0.0556  | -0.2073 | -0.1513 | -0.1265 | 0.2319  | -0.2667 | 0.0713  | -0.4416 | -0.3555 | 0.3425  |
| PY01269 | -0.5634 | -0.1925 | -0.0932 | -0.6459 | -0.4397 | -0.0397 | 0.0396  | 0.2725  | 0.1948  | -0.224  | 0.1068  | 0.1762  |
| PY03450 | -0.9391 | -0.0578 | 0.2512  | 0.0405  | -0.1774 | -0.267  | -0.161  | -0.086  | 0.0184  | 0.0471  | 0.1362  | -0.0833 |
| PY03233 | -0.1474 | 0.0787  | 0.1335  | -0.0481 | 0.1681  | -0.0118 | -0.0801 | -0.2192 | -0.3085 | -0.2916 | 0.1143  | -0.0995 |
| PY01252 | -0.2819 | 0.0724  | 0.167   | 0.2564  | -0.2235 | -0.2861 | -0.0874 | 0.3682  | 0.2297  | 0.2724  | 0.3563  | -0.3349 |
| PY01583 | -0.4812 | -0.199  | -0.0216 | -0.0086 | 0.2641  | 0.0289  | 0.054   | 0.0948  | -0.0268 | 0.2694  | 0.6037  | -0.077  |
| PY01749 | 0.2484  | 0.0217  | -0.4584 | 0.2395  | 0.1364  | -0.1801 | -0.1154 | -0.1075 | -0.1419 | 0.0246  | -0.0296 | -0.1327 |
| PY06974 | 0.0011  | 0.2699  | 0.3801  | 0.2101  | -0.0757 | -0.1044 | -0.3271 | -0.5832 | -0.1368 | 0.2749  | 1.8465  | 0.1712  |
| PY00890 | -0.9754 | -0.1359 | 0.2009  | -0.1285 | -0.3192 | -0.5795 | -0.4601 | -0.0964 | -0.0501 | 0.1146  | 0.7197  | -0.1594 |
| PY02869 | -1.0728 | -0.7429 | -0.423  | -0.5981 | -0.7193 | -0.1669 | -0.0501 | 0.676   | 0.1763  | 0.4547  | 0.6239  | 0.2457  |
| PY04545 | 0.4883  | 0.2082  | 0.1478  | -1.0686 | -0.2128 | -0.1304 | -0.1075 | -0.2205 | -0.0181 | -0.5094 | -0.4103 | 0.0737  |
| PY06951 | 1.2612  | 0.6892  | -0.1708 | 0.3196  | -0.4801 | -0.1344 | 0.136   | -0.1532 | 0.0136  | -0.2501 | -0.5837 | 0.0042  |
| PY02257 | -0.6511 | 0.1041  | 0.3158  | 0.0583  | -0.4607 | -0.0892 | -0.1628 | -0.0645 | -0.0719 | 0.2661  | -0.0599 | 0.0615  |
| PY04851 | 0.4924  | 0.0033  | -0.4178 | 0.014   | 0.4502  | -0.0474 | -0.0935 | -0.3292 | -0.1221 | -0.1343 | -0.1005 | 0.0286  |
| PY05026 | -0.6189 | 0.0351  | 0.2218  | -1.1451 | -0.4756 | -0.3636 | 0.1231  | 0.3071  | 0.4704  | -0.2903 | 0.2494  | -0.3179 |
| PY03066 | 0.1295  | 0.192   | 0.0866  | -0.4215 | -0.1465 | -0.2357 | 0.01    | -0.1027 | 0.1107  | -0.9463 | -0.2122 | 0.0681  |
| PY05697 | 0.0361  | -0.0656 | -0.0197 | -0.2397 | 0.0256  | 0.0088  | 0.2768  | -0.0489 | 0.0543  | 0.0556  | -0.1221 | 0.3426  |
| PY07098 | 0.6591  | 0.345   | -0.0825 | -0.2307 | -0.2735 | -0.1974 | -0.2704 | -0.1186 | 0.0136  | -0.3463 | -0.2336 | -0.7456 |
| PY00152 | -0.8107 | -0.0056 | 0.0107  | -0.011  | 0.2154  | 0.3055  | -0.1723 | -0.089  | -0.0874 | 0.0318  | -0.0415 | -0.2059 |
| PY02503 | 0.2906  | 0.1334  | 0.1405  | 0.1644  | -0.0036 | -0.0108 | -0.1676 | -0.2048 | -0.1614 | 0.0207  | 0.2347  | 0.0663  |
| PY04753 | -0.2351 | -0.2449 | -0.2543 | -0.3685 | 0.2405  | -0.0108 | -0.1165 | -0.2948 | -0.3675 | -0.2544 | -0.1713 | -0.311  |
| PY07352 | 0.909   | 0.794   | -0.0677 | 0.4153  | -0.3474 | -0.371  | -1.0244 | 0.1848  | 0.2152  | 0.5415  | 0.0394  | -0.2297 |
| PY06282 | 0.7958  | 0.3057  | 0.4154  | -0.4605 | -0.2517 | 0.0094  | 0.0878  | -0.2928 | -0.1081 | 0.0656  | -0.5378 | 0.0933  |
| PY02715 | 0.0703  | 0.171   | 0.2637  | 0.5597  | 0.034   | 0.1309  | -0.1121 | 0.0662  | -0.1411 | 0.2342  | -0.2421 | -0.2438 |
| PY05750 | -0.013  | -0.2506 | 0.2095  | -0.429  | -0.007  | -0.0253 | 0.2496  | 0.2965  | 0.1042  | -0.1443 | 0.0641  | 0.0847  |
| PY06964 | -0.6226 | -0.1284 | -0.3011 | -0.6191 | -0.1722 | -0.6313 | -0.3531 | -0.0071 | 0.143   | -0.0432 | 0.4182  | -0.3304 |
| PY03188 | 0.082   | -0.2676 | -0.1192 | -0.4332 | 0.2076  | 0.0142  | -0.2395 | -0.3513 | 0.164   | -0.5129 | -0.2156 | 0.061   |
| PY05885 | 0.8383  | 0.2813  | 0.1405  | 0.0886  | -0.0796 | -0.2324 | 0.0961  | -0.1701 | -0.0344 | -0.1195 | -0.5045 | 0.192   |
| PY06466 | 0.2483  | 0.0422  | -0.082  | 0.1059  | 0.4003  | -0.0753 | -0.2954 | -0.3023 | -0.288  | 0.0773  | 0.1164  | -0.2006 |
| PY03616 | -0.1842 | -0.2261 | 0.2018  | -0.6954 | -0.0016 | 0.0372  | -0.0492 | -0.0386 | -0.1804 | -0.301  | -0.1805 | -0.12   |
| PY00088 | 0.1416  | -0.2722 | -0.0126 | 0.2112  | 0.47    | 0.0518  | -0.0769 | 0.0422  | 0.1316  | 0.1672  | 0.1085  | 0.0666  |
| PY04028 | 0.4942  | -0.0316 | -0.2962 | 0.2436  | 0.0569  | -0.2964 | -0.3768 | -0.4078 | -0.3842 | -0.1499 | -0.5208 | -0.018  |
| PY01885 | 0.0857  | -0.0807 | 0.156   | -0.2865 | -0.2794 | 0.0473  | 0.0274  | -0.1287 | 0.1795  | -0.3238 | -0.5354 | 0.1284  |
| PY04785 | -0.2418 | 0.3551  | 0.6294  | -0.0566 | -0.0967 | -0.1283 | 0.2677  | 0.1908  | 0.3819  | -0.0015 | 0.3113  | 0.204   |
| PY01281 | 0.0091  | 0.0752  | -0.0111 | -0.4234 | -0.3159 | -0.3344 | -0.0995 | -0.199  | -0.3374 | 0.0885  | -0.0169 | -0.0247 |
| PY02929 | -0.1091 | -0.0524 | 0.3567  | 0.3331  | -0.1179 | -0.0193 | -0.194  | -0.0682 | 0.0654  | 0.1937  | 0.1908  | 0.4492  |
| PY00421 | -1.0605 | -0.371  | -0.1822 | -0.3482 | 0.0962  | -0.1044 | 0.027   | 0.0132  | 0.0941  | 0.1715  | 0.1976  | 0.0121  |
| PY04351 | -0.716  | -0.5007 | -0.0909 | -0.8305 | -0.4314 | 0.3369  | 0.1064  | 0.2851  | 0.3808  | -0.1591 | 0.1572  | -0.3209 |
| PY03511 | 0.7704  | 0.3021  | 0.4795  | 0.3294  | 0.7096  | 0.462   | 0.1423  | -0.0912 | -0.1476 | -0.0101 | 0.0828  | 0.0159  |
| PY00669 | -0.7552 | -0.3915 | -0.1792 | 0.5824  | -0.3229 | -0.3836 | -0.5076 | 0.2722  | -0.284  | 0.5274  | -0.0209 | -0.0945 |
| PY06408 | -0.2719 | -0.4727 | 0.1988  | 0.0844  | -0.1186 | -0.2912 | -0.4372 | -0.4496 | -0.2861 | -0.4282 | -0.5531 | -0.1036 |
| PY01218 | -0.4393 | -0.2702 | -0.0414 | -0.493  | -0.049  | -0.1079 | 0.2443  | 0.2924  | -0.014  | -0.8736 | -0.0689 | -0.3127 |
| PY03527 | -1.1673 | -0.3395 | -0.1744 | -0.1898 | -0.6663 | -0.1432 | -0.0371 | 0.3991  | 0.4683  | 0.6903  | 0.4926  | 0.4736  |
| PY01294 | 0.17    | -0.1632 | -0.4062 | 1.125   | 0.2126  | 0.0201  | -0.2666 | -0.0131 | -0.1927 | -0.1401 | 0.1279  | -0.1604 |
| PY05997 | -0.1066 | 0.0768  | 0.5746  | 0.0293  | -0.0881 | 0.3677  | 0.541   | 0.3735  | 0.3664  | -0.2193 | 0.1797  | 0.0387  |
| PY00705 | -0.7153 | -0.4323 | -0.8022 | -0.2818 | 0.3135  | 0.1118  | -0.1424 | -0.031  | -0.0414 | 0.1249  | 0.2262  | 0.129   |
| PY02961 | -0.5078 | -0.1847 | -0.297  | -0.045  | -0.1929 | -0.2645 | -0.2083 | -0.1095 | 0.0253  | 0.2914  | 0.3077  | -0.1475 |
| PY04401 | -0.13   | 0.1035  | 0.239   | 0.1321  | 0.0497  | 0.2534  | 0.0194  | 0.3087  | 0.3241  | -0.0401 | -0.1137 | -0.0365 |
| PY05579 | 0.0575  | -0.2577 | -0.0782 | 0.3525  | -0.3493 | -0.3493 | -0.0914 | 0.4663  | 0.3905  | 0.6034  | 0.1736  | 0.0923  |
| PY02427 | 0.0362  | 0.0229  | 0.1611  | -0.0226 | 0.9566  | -0.062  | 0.3515  | -0.0047 | 0.5137  | -0.1622 | 0.1258  | 0.8367  |
| PY02905 | 0.9539  | 0.4374  | 0.6376  | 0.047   | -0.2155 | 0.1065  | 0.0171  | -0.4116 | -0.1951 | -0.3241 | -0.7917 | -0.2813 |
| PY01025 | -0.6488 | 0.0983  | -0.0485 | -0.0774 | 0.1592  | 0.8165  | 0.4676  | 0.6038  | 0.0232  | 0.346   | -0.1374 | 0.0059  |
| PY01276 | -1.2856 | -0.0951 | 0.2396  | -0.4001 | -1.0696 | -0.0821 | 0.0325  | 0.2728  | 0.2286  | -0.5363 | -0.073  | -0.7794 |
| PY07155 | -0.5118 | 0.1106  | 0.3384  | 0.1788  | -0.3768 | -0.1268 | 0.1945  | 0.3731  | 0.3024  | -0.6062 | 0.3242  | 0.239   |
| PY05050 | -0.7638 | -0.5374 | -0.0036 | -0.4388 | -0.1973 | 0.1497  | -0.1945 | 0.0747  | 0.1594  | -0.1607 | -0.0176 | 0.213   |
| PY05086 | 0.193   | 0.2395  | 0.1119  | 0.2382  | 0.2483  | 0.305   | 0.2654  | -0.0312 | -0.228  | -0.1747 | -0.7528 | -0.0793 |
| PY03763 | 0.4425  | 0.0501  | -0.159  | -0.129  | -0.5191 | 0.238   | 0.2627  | 0.1849  | 0.2644  | 0.4371  | -0.2845 | 0.0588  |
| PY00739 | 0.3809  | -0.1587 | 0.3248  | -1.3929 | -0.5931 | 0.3403  | -0.0082 | -1.183  | 0.185   | 0.3359  | -0.5198 | 0.1906  |
| PY07323 | -0.5772 | 0.1587  | 0.1965  | -0.3964 | -0.321  | -0.3343 | -0.1458 | -0.0587 | -0.0357 | 0.0987  | -0.0902 | -0.222  |
| PY00215 | -0.2225 | -0.0443 | -0.4695 | -0.1174 | 0.3276  | 0.2021  | -0.0395 | 0.0349  | -0.1896 | 0.2066  | 0.1353  | 0.0572  |
| PY04888 | -0.2843 | 0.1956  | 0.0434  | 0.4479  | 0.3619  | 0.4326  | -0.3054 | -0.0199 | -0.0433 | 0.1048  | -0.0466 | -0.1669 |

|         |         |         |         |         |         |         |         |         |         |         |         |         |
|---------|---------|---------|---------|---------|---------|---------|---------|---------|---------|---------|---------|---------|
| PY06284 | -1.059  | -0.3611 | -0.1314 | -0.393  | -0.5863 | -0.1816 | -0.0188 | 0.0285  | 0.4091  | -0.0357 | 0.4544  | 0.0572  |
| PY05502 | -0.7037 | -0.4133 | -0.3198 | -0.9514 | -0.1198 | 0.3913  | 0.1188  | 0.5473  | 0.1615  | -0.2416 | 0.2409  | -0.3685 |
| PY02682 | 0.6882  | 0.1878  | -0.1209 | 0.5408  | 0.2397  | -0.0778 | -0.1169 | -0.1319 | -0.1762 | 0.1662  | 0.0048  | 0.2161  |
| PY00094 | 0.6227  | 0.1026  | 0.2415  | 0.1423  | 0.0238  | 0.1232  | 0.181   | -0.0494 | 0.029   | 0.124   | -0.1825 | 0.1719  |
| PY06418 | -0.6651 | -0.6646 | -0.2801 | -0.1579 | -0.434  | -0.1251 | -0.1191 | -0.0421 | 0.1344  | -0.111  | 0.2686  | -0.0412 |
| PY03209 | -0.762  | -0.0254 | 0.0562  | -0.5839 | -0.4505 | 0.0996  | 0.2507  | 0.1792  | 0.2489  | -0.126  | 0.0746  | -0.2565 |
| PY04814 | -0.5156 | -0.0789 | 0.0561  | 0.0342  | 0.3165  | 0.0213  | -0.1857 | -0.351  | -0.4438 | 0.252   | 0.2155  | -0.2617 |
| PY05584 | 0.8949  | 0.8213  | 1.1272  | 0.1378  | -0.2288 | 0.0259  | 0.5475  | -0.2532 | 0.375   | -0.0168 | -0.4231 | 0.5529  |
| PY05470 | -0.4831 | -0.3165 | -0.4261 | 0.0414  | -0.0558 | 0.142   | -0.2503 | 0.1499  | 0.1019  | 0.5192  | -0.2076 | 0.2849  |
| PY05726 | 0.2852  | -0.0183 | -0.3738 | 0.5876  | 0.3266  | -0.0262 | -0.2648 | -0.2212 | -0.1097 | 0.1258  | 0.2663  | 0.0836  |
| PY05673 | 0.4244  | 0.3979  | 0.3057  | 0.6661  | -0.08   | 0.0039  | 0.1122  | 0.1012  | 0.4218  | 0.56    | -0.582  | -0.3153 |
| PY04742 | -0.3982 | -0.3457 | -0.1386 | 0.3275  | 0.2552  | 0.1606  | 0.215   | 0.1898  | 0.2748  | 0.0289  | 0.1428  | 0.2514  |
| PY06145 | -0.1955 | -0.0131 | 0.1851  | 0.2293  | 0.2083  | 0.0754  | 0.0422  | 0.0741  | 0.2328  | 0.241   | 0.1532  | -0.4135 |
| PY05272 | -0.7323 | -0.2624 | -1.7662 | 0.0641  | 0.1647  | -0.271  | 0.0044  | -0.1171 | 0.3085  | 0.0646  | 0.8547  | -0.2195 |
| PY02297 | -0.0152 | 0.1111  | 0.0221  | 0.8255  | 0.2238  | 1.1139  | 0.47    | 0.5741  | 0.3333  | 0.5608  | 0.4755  | 0.2529  |
| PY06941 | 0.4662  | 0.1651  | 0.0782  | 0.1269  | 0.2105  | 0.1697  | 0.3184  | 0.092   | 0.2139  | 0.1242  | 0.0043  | 0.4584  |
| PY05764 | -0.245  | -0.1151 | -0.3152 | -0.1454 | 0.2536  | 0.0378  | 0.1715  | 0.1502  | 0.2141  | 0.1046  | 0.4799  | 0.1317  |
| PY07307 | -0.1781 | -0.0237 | -0.2248 | -0.2165 | 0.273   | 0.0192  | -0.2731 | -0.1367 | -0.2341 | -0.0789 | 0.0314  | 0.0931  |
| PY04399 | -0.4233 | -0.2025 | -0.3456 | -0.4399 | -1.6419 | 0.3124  | 0.2306  | 0.1754  | 0.3726  | -0.1728 | -0.1184 | 0.1604  |
| PY00911 | -0.6136 | -0.3555 | -0.2407 | 0.1012  | 0.0598  | 0.2865  | 0.1153  | 0.7065  | -0.6245 | 0.1116  | 0.2707  | -0.4823 |
| PY06602 | -0.6966 | -0.1941 | -0.2992 | -0.3019 | 0.3521  | -0.2824 | -0.3625 | -0.1443 | -0.1506 | -0.4654 | -0.0178 | -0.3191 |
| PY03760 | -0.1639 | 0.0426  | 0.3082  | 0.8029  | 0.2619  | 0.0352  | 0.1506  | 0.3274  | 0.4079  | -0.4034 | 0.6022  | -0.1629 |
| PY05587 | -1.678  | -0.4202 | -0.1155 | -0.3785 | -0.1604 | -0.3876 | -0.0856 | 0.1459  | 0.1576  | -0.4359 | 0.3053  | -0.4544 |
| PY07088 | 0.3788  | 0.3624  | 0.1189  | -0.5021 | -0.44   | -0.1287 | -0.0785 | -0.4877 | 0.1091  | 0.0509  | -0.3009 | -0.1603 |
| PY00721 | -0.5118 | -0.0787 | -0.1903 | 0.3485  | 0.0251  | 0.0884  | 0.0704  | 0.4158  | 0.0842  | 0.1511  | 0.3935  | -0.2419 |
| PY00196 | 0.4787  | -0.0727 | -0.2367 | 0.6298  | 0.5426  | 0.0012  | -0.1    | 0.2297  | 0.0673  | 0.6546  | 0.5896  | 0.217   |
| PY01632 | -0.167  | -0.2503 | -0.3211 | 0.4138  | 0.1035  | 0.689   | -0.2475 | 0.0516  | 0.0182  | 0.2419  | 0.2818  | 0.5273  |
| PY02454 | 0.2569  | 0.0788  | -0.4172 | -0.0637 | -0.4522 | -0.201  | -0.4145 | -0.4785 | -0.2858 | -0.5057 | -0.2785 | -0.6321 |
| PY03477 | -0.5643 | -0.1814 | -0.0423 | -0.2216 | -0.1658 | 0.1546  | -0.0667 | 0.332   | 0.1556  | 0.1645  | 0.3508  | -0.2353 |
| PY06072 | -0.4139 | -0.1781 | -0.1225 | -0.8251 | -0.1837 | -0.0069 | -0.085  | -0.2553 | 0.2958  | -0.2541 | -0.149  | -0.0271 |
| PY06698 | 0.0572  | 0.0632  | 0.0044  | -0.0463 | -0.152  | -0.0005 | -0.2284 | 0.0247  | 0.1169  | -0.128  | 0.1599  | 0.0589  |
| PY06928 | 0.0694  | -0.0628 | 0.0515  | -0.0452 | -0.0606 | 0.3397  | 0.2797  | 0.0369  | 0.0739  | -0.0543 | -0.1421 | 0.0699  |
| PY01154 | -0.0165 | -0.3821 | 0.0002  | 0.0507  | 0.3036  | 0.3155  | 0.1602  | 0.0694  | -0.0792 | 0.2369  | 0.1032  | 0.0078  |
| PY03575 | -0.5239 | -0.4912 | -0.078  | 0.7863  | 0.9906  | 0.8753  | 0.1718  | 0.5301  | -0.0394 | 0.8213  | 1.0279  | 0.0142  |
| PY06597 | -0.5066 | -0.3535 | -0.0868 | 0.0601  | 0.0963  | 0.1499  | 0.1715  | 0.7427  | 0.2048  | -0.2359 | 0.1307  | -0.4811 |
| PY07617 | 0.8597  | 0.5429  | -0.0373 | -0.7662 | 0.1192  | -0.3069 | -0.0818 | -0.4818 | -0.0718 | -0.8351 | -0.2467 | -0.8602 |
| PY01063 | -0.0557 | -0.1276 | -0.3989 | 0.1168  | 0.136   | 0.2486  | 0.0128  | -0.0059 | -0.4084 | -0.1584 | -0.4615 | -0.0854 |
| PY01669 | 0.5186  | 0.1359  | 0.1461  | -0.0419 | 0.0474  | 0.0679  | 0.0287  | -0.197  | -0.2576 | -0.0865 | -0.0849 | 0.1574  |
| PY02649 | -0.7573 | -0.0407 | 0.0723  | 0.0963  | 0.1884  | 0.0775  | -0.1206 | -0.0951 | -0.1108 | 0.1171  | 0.2883  | -0.2394 |
| PY05293 | -0.0476 | -0.22   | -0.3029 | -0.3814 | 0.3465  | -0.1398 | 0.1678  | 0.0774  | 0.0706  | 0.0906  | 0.5655  | 0.6234  |
| PY05239 | 0.8247  | 0.3347  | 0.5743  | 1.2403  | 0.0253  | 0.1709  | 0.4817  | 0.1214  | 0.3363  | 0.1197  | -0.1397 | 0.5589  |
| PY04386 | 1.056   | 0.6295  | 0.8294  | 0.1641  | -0.3154 | 0.0006  | 0.4321  | -0.3638 | 0.3388  | 0.0773  | -0.6884 | 0.7303  |
| PY01728 | 0.038   | -0.1512 | 0.0612  | 0.09    | 0.1736  | -0.1486 | 0.2224  | -0.1147 | -0.12   | -1.0295 | -0.2945 | -0.0992 |
| PY01208 | 0.6786  | 0.5611  | 0.6732  | 0.0885  | -0.0716 | 0.1998  | 0.3883  | 0.2914  | 0.2755  | -0.1707 | -0.2374 | -0.2657 |
| PY00678 | 0.7087  | -0.1366 | -0.2303 | 0.5297  | 0.1619  | 0.1676  | -0.2421 | 0.215   | -0.0484 | 0.7081  | 0.1075  | 0.0547  |
| PY01666 | 0.5342  | 0.3776  | -0.2829 | -0.3256 | -0.379  | 0.0563  | 0.1303  | -0.0934 | 0.2024  | 0.1595  | 0.0271  | 0.0271  |
| PY01471 | 0.0339  | -0.0522 | -0.0795 | -0.1771 | -0.2135 | -0.2329 | -0.0456 | -0.0929 | -0.0958 | 0.2232  | 0.3919  | 0.0473  |
| PY04072 | -0.1079 | -0.2557 | 0.1162  | 0.3071  | -0.048  | -0.1147 | 0.0284  | 0.0748  | 0.1568  | 0.4453  | 0.1228  | 0.1849  |
| PY02686 | -0.628  | -0.1496 | -0.3329 | -0.4307 | 0.4871  | -0.06   | -0.1331 | 0.2094  | 0.0923  | 0.1743  | 0.7968  | 0.2496  |
| PY00926 | -0.1027 | -0.0298 | 0.1406  | -0.6411 | -0.5335 | -0.1719 | 0.1132  | -0.222  | 0.2014  | -0.095  | -0.3154 | 0.2718  |
| PY01753 | -0.8355 | -0.1773 | -0.4282 | -0.517  | -0.2038 | -0.1884 | 0.0083  | 0.6678  | 0.5532  | 0.3247  | 1.0154  | -0.2717 |
| PY05570 | 0.2028  | 0.1748  | 0.0472  | 0.7769  | 0.4223  | 0.0151  | -0.0981 | -0.2422 | 0.1354  | 0.2191  | 0.4715  | 0.2919  |
| PY02642 | 0.1964  | 0.2831  | 0.2174  | 0.3939  | 0.1726  | 0.2567  | 0.0742  | 0.1789  | 0.0998  | 0.5717  | 0.1873  | -0.0326 |
| PY04975 | 0.4788  | 0.1914  | -0.3804 | -1.3558 | -0.2708 | -0.15   | -0.0307 | -0.1252 | -0.5258 | -0.7515 | -0.3545 | -0.7383 |
| PY05054 | -0.2705 | -0.057  | 0.4656  | 0.4704  | 0.1609  | -0.057  | 0.1829  | 0.261   | 0.5004  | -0.0339 | 0.1241  | -0.0863 |
| PY02412 | 0.0107  | 0.115   | 0.0558  | 0.5682  | 0.3322  | 0.0585  | 0.0453  | 0.2963  | -0.2718 | 0.4665  | 0.3165  | 0.0859  |
| PY04502 | -0.4047 | -0.5089 | -0.8477 | -0.404  | -0.4293 | -0.4254 | -0.1572 | 0.2179  | 0.37    | 0.4077  | 0.2685  | 0.6736  |
| PY04191 | 0.1998  | 0.1367  | -0.0354 | -0.1604 | -0.0098 | 0.0899  | -0.2106 | -0.7964 | -0.3441 | -0.4414 | -0.3985 | -0.1944 |
| PY01833 | 0.1221  | -0.2032 | -0.0148 | 0.2458  | 0.2275  | 0.0157  | 0.1593  | 0.0962  | 0.1362  | 0.4236  | 0.4294  | 0.4     |
| PY02487 | 0.6934  | 0.1415  | -0.074  | 0.5748  | -0.1589 | 0.1801  | -0.1159 | -0.0693 | -0.2412 | -0.2592 | -0.8196 | -0.126  |
| PY02644 | 1.0766  | 0.4132  | 0.3228  | 0.3255  | -0.0197 | 0.3727  | 0.2944  | -0.2134 | 0.1108  | 0.1533  | -0.5916 | -0.158  |
| PY05030 | -1.3802 | -0.8301 | -0.8309 | -0.3816 | -0.4146 | -0.4618 | -0.0959 | 0.5587  | 0.2214  | 0.0054  | 0.7801  | -0.3718 |
| PY05551 | 0.0423  | -0.3353 | -0.2333 | -0.1157 | -0.2549 | -0.6207 | -0.3739 | -0.6095 | -0.3395 | -0.6751 | -0.6201 | -0.1825 |

|         |         |         |         |         |         |         |         |         |         |         |         |         |
|---------|---------|---------|---------|---------|---------|---------|---------|---------|---------|---------|---------|---------|
| PY05743 | 0.1803  | 0.0361  | -0.0481 | -0.7655 | -0.3639 | 0.1198  | 0.215   | -0.6294 | -1.1877 | -0.4795 | -0.9688 | -0.7806 |
| PY00408 | -1.1816 | -0.2079 | 0.0445  | -0.5318 | -0.8571 | -0.3861 | -0.1571 | 0.016   | 0.4818  | 0.2323  | 0.73    | 0.1391  |
| PY04331 | -0.178  | -0.136  | -0.1397 | -0.5723 | -0.1826 | -0.0476 | 0.0176  | -0.3204 | -1.1741 | -0.7535 | 0.1487  | -0.5592 |
| PY05879 | -0.0292 | -0.0849 | 0.181   | -0.464  | -0.347  | -0.177  | -0.1914 | 0.0425  | -0.0694 | -0.0833 | -0.0143 | 0.1748  |
| PY06345 | -0.6947 | -0.4113 | -0.2627 | -0.3404 | -0.5449 | -0.6301 | -0.2849 | -0.0275 | 0.0456  | -0.4541 | -0.078  | -0.0349 |
| PY05630 | 0.5632  | 0.1209  | -0.6316 | 0.2688  | 0.5811  | 0.3519  | -0.0919 | -0.0441 | -0.2717 | 0.0049  | -0.251  | -0.5987 |
| PY00787 | -0.7115 | -0.7344 | -0.6283 | 0.1339  | 0.383   | -0.2878 | -0.4486 | -0.2054 | -0.5481 | 0.1032  | 0.0709  | -0.3934 |
| PY00986 | 0.6319  | 0.2273  | 0.6334  | 0.4437  | -0.0369 | 0.0018  | -0.3195 | -0.4644 | -0.341  | -0.0826 | -0.6158 | -0.3122 |
| PY01870 | -0.3137 | -0.0617 | 0.3058  | 0.2504  | 0.1079  | -0.0754 | -0.1172 | -0.0815 | -0.0545 | 0.1255  | 0.2537  | -0.2206 |
| PY06664 | 0.3426  | 0.3334  | 0.5983  | 0.0217  | -0.007  | -0.0412 | 0.0794  | -0.3991 | 0.0095  | -0.0436 | -0.6541 | -0.0176 |
| PY05890 | -0.32   | -0.4355 | -0.1747 | 0.4846  | 0.2934  | 0.1826  | 0.1288  | 0.0862  | -0.0701 | -0.0517 | 0.3412  | 0.1488  |
| PY04119 | 0.3961  | 0.15    | 0.3274  | 0.2256  | 0.1177  | 0.0678  | 0.0717  | -0.0116 | 0.0827  | -0.1486 | -0.1372 | 0.3333  |
| PY04719 | -0.113  | -0.0216 | -0.4128 | -0.6786 | -0.2283 | -0.3526 | -0.082  | -0.01   | -0.0349 | 0.1431  | 0.2667  | -0.012  |
| PY06450 | 0.3271  | 0.3394  | 0.1763  | -0.1327 | -0.2788 | 0.4592  | 0.3011  | -0.0166 | 0.3573  | -0.0324 | -0.6995 | 0.3699  |
| PY02633 | 0.7388  | 0.4581  | 0.6196  | -0.2312 | -0.2347 | -0.3752 | 0.3047  | 0.0487  | 0.322   | -0.4253 | -0.2851 | 0.7542  |
| PY05590 | 0.8759  | 0.2053  | 0.5231  | -0.0154 | -0.06   | -0.3627 | -0.4139 | -0.6367 | -0.1675 | 0.1002  | -0.3486 | -0.0163 |
| PY06791 | 0.2266  | 0.0669  | -0.2228 | -0.9024 | -0.1292 | 0.56    | 0.1681  | -0.403  | -0.1793 | -0.5252 | -0.5334 | -0.098  |
| PY07079 | 0.3027  | 0.2342  | -0.0278 | 1.5397  | 0.6304  | 0.2508  | 0.1627  | -0.0865 | 0.1072  | 0.2394  | 0.406   | 0.0462  |
| PY01857 | -0.5683 | -0.6483 | -0.5739 | 0.5856  | 0.6618  | 0.1435  | -0.0612 | 0.0667  | -0.4028 | 0.8903  | 0.2033  | -0.2007 |
| PY06550 | 0.1213  | 0.3489  | -0.1053 | 0.5976  | -0.2728 | -0.0261 | -0.0029 | -0.065  | 0.1104  | -0.3464 | 0.2124  | -0.2258 |
| PY02746 | -0.5735 | -0.2299 | -0.1955 | -0.2296 | -0.0443 | -0.0584 | -0.1857 | 0.3945  | 0.0042  | 0.1558  | 0.4638  | -0.0512 |
| PY04523 | 0.152   | -0.0842 | -0.3576 | -0.1839 | -0.1155 | -0.1169 | -0.0221 | -0.0007 | -0.4726 | -0.1218 | -0.0751 | -0.3777 |
| PY00378 | -1.2519 | -0.4457 | -0.1414 | -1.0882 | -0.9249 | -0.4283 | -0.3879 | 0.1733  | 0       | -0.1309 | 0.4235  | -0.304  |
| PY05557 | 0.0819  | 0.41    | -0.3927 | -0.3124 | -0.3391 | -0.2841 | -0.0025 | -0.0598 | 0.2403  | 0.2513  | 0.3746  | -0.3894 |
| PY04672 | 0.1298  | 0.2879  | 0.2099  | -2.0915 | -1.3216 | -0.1209 | 0.1455  | -0.8662 | 0.1719  | -1.0248 | -1.1272 | 0.225   |
| PY03745 | 0.283   | 0.178   | 0.2967  | -0.4555 | -0.1106 | 0.0163  | 0.2233  | -0.1453 | 0.2605  | 0.0795  | -0.1645 | 0.1939  |
| PY02001 | 0.0083  | -0.2059 | -0.1503 | 0.9331  | 0.638   | 0.3677  | 0.0595  | 0.1924  | 0.1701  | 0.7777  | 0.2596  | 0.1333  |
| PY04193 | -0.1426 | -0.1049 | 0.0192  | 0.0307  | -0.0374 | -0.0755 | -0.0702 | -0.1746 | -0.1379 | -0.3047 | -0.2973 | -0.3015 |
| PY00747 | 0.109   | -0.2261 | -0.8218 | -0.0432 | 0.4156  | 0.0357  | -0.0533 | -0.076  | -0.2561 | -0.385  | -0.5167 | -0.0867 |
| PY02008 | -0.2353 | -0.3525 | 0.2874  | -0.0858 | -0.2767 | -0.458  | -0.2947 | -0.289  | 0.2521  | -0.1873 | 0.0707  | 0.039   |
| PY04433 | 1.1324  | 1.0475  | 1.0229  | 0.1885  | -0.5599 | 0.176   | 0.4128  | -0.3407 | 0.3877  | -0.5185 | -1.3636 | -0.0314 |
| PY04366 | 0.0553  | -0.5618 | -0.2598 | -0.1091 | -0.1003 | -0.1157 | -0.1613 | 0.1045  | -0.029  | 0.3084  | 0.3938  | 0.1302  |
| PY04591 | -0.086  | -0.1537 | -0.1122 | -0.6298 | -0.1223 | 0.0086  | -0.0439 | -0.2953 | -0.1859 | 0.0458  | -0.3163 | 0.007   |
| PY01353 | -0.4592 | -0.7369 | -0.8731 | -0.1778 | -0.3104 | -0.0735 | 0.1816  | 0.3913  | 0.4059  | 0.719   | 0.1977  | 0.5501  |
| PY04531 | 0.356   | 0.2218  | 0.1147  | -0.2875 | 0.1703  | 0.285   | 0.1112  | -0.1666 | -0.0403 | -0.3279 | -0.1255 | -0.0645 |
| PY06011 | 0.249   | -0.013  | -0.2725 | 0.1747  | 0.2558  | 0.1542  | -0.0551 | -0.2454 | -0.1251 | -0.2753 | -0.7652 | -0.2881 |
| PY00475 | -0.4972 | 0.1458  | -0.0779 | -0.7747 | -0.43   | -0.4028 | -0.312  | 0.0021  | -0.1053 | -0.1059 | 0.6282  | -0.484  |
| PY03491 | 0.3392  | -0.0109 | 0.3215  | -0.348  | -0.2737 | -0.0014 | 0.1777  | 0.0535  | 0.2552  | 0.1328  | -0.3404 | 0.3978  |
| PY01737 | -0.0404 | 0.3363  | 0.2166  | 0.1427  | 0.0766  | 0.3154  | 0.3274  | 0.033   | -0.0394 | -0.1034 | 0.4219  | 0.001   |
| PY01655 | -0.1605 | 0.0608  | 0.0981  | 0.3844  | 0.0367  | -0.0269 | -0.1143 | 0.0777  | -0.0839 | -0.0744 | -0.127  | 0.1372  |
| PY05685 | 0.7932  | 0.4031  | -0.0941 | -0.2896 | -0.7551 | -0.0825 | 0.2222  | 0.2396  | 0.7563  | 0.139   | -0.1653 | -0.2398 |
| PY01164 | -0.0482 | -0.0871 | -0.2929 | 0.5918  | 0.0297  | 0.1496  | 0.0464  | 0.4724  | 0.0592  | -0.1372 | -0.0151 | -0.1755 |
| PY02992 | 0.5014  | 0.348   | 0.2597  | -0.2273 | -0.3387 | -0.0152 | 0.1176  | -0.0911 | 0.1134  | -0.3341 | -0.5612 | 0.3101  |
| PY06750 | 1.0017  | 0.3317  | -0.6758 | -0.5633 | -0.2992 | -0.5583 | -0.3184 | -0.2836 | -1.0858 | -0.8684 | -0.0486 | -0.655  |
| PY00162 | 0.996   | 0.439   | 0.4159  | -0.138  | -0.5312 | -0.4157 | -0.129  | -0.283  | -0.0398 | -0.107  | -0.6249 | 0.0351  |
| PY06945 | 0.4882  | 0.115   | 0.0766  | -0.0363 | 0.1137  | -0.0164 | -0.1318 | -0.1698 | -0.0572 | -0.3851 | -0.2148 | -0.0421 |
| PY03531 | -0.1305 | 0.1069  | 0.3725  | 0.3874  | 0.2596  | 0.241   | 0.1012  | -0.147  | -0.1129 | -0.0189 | -0.4405 | -0.1231 |
| PY06027 | -0.218  | -0.0937 | 0.2513  | 0.1286  | -0.9091 | -0.1084 | -0.0479 | 0.0085  | 0.1823  | -0.8826 | 0.9668  | 0.0228  |
| PY04471 | -0.3408 | -0.4821 | -0.1059 | -0.407  | -0.2751 | 0.0709  | -0.3043 | 0.0295  | 0.5886  | -0.2621 | 0.1677  | 0.3702  |
| PY05397 | -0.5728 | -0.3678 | 0.0239  | -0.167  | -0.2924 | 0.0252  | 0.1381  | 0.2762  | 0.4953  | 0.5714  | 0.5448  | 0.3304  |
| PY04411 | -0.1713 | -0.0824 | 0.0545  | -0.2723 | 0.3355  | -0.1635 | -0.0561 | -0.2418 | 0.2095  | 0.0981  | 0.1742  | 0.1174  |
| PY03934 | -0.3486 | 0.3239  | 0.0222  | 0.4722  | 0.2412  | -0.116  | 0.1959  | -0.1965 | 0.0668  | 0.2165  | 0.7149  | -0.0786 |
| PY07337 | 0.0598  | 0.0804  | 0.2635  | 0.2373  | 0.2444  | -0.1508 | -0.1882 | -0.3232 | 0.1462  | -0.074  | -0.0431 | -0.1069 |
| PY05229 | 0.0249  | -0.1949 | -0.0025 | 0.4541  | 0.2156  | -0.1966 | -0.1282 | -0.0598 | -0.3531 | 0.0991  | 0.2141  | 0.2255  |
| PY06430 | -0.066  | -0.272  | 0.0654  | -1.075  | -0.0951 | -0.0879 | 0.0051  | -0.5324 | -0.0325 | -0.4671 | -0.5755 | 0.2093  |
| PY04830 | 0.6608  | 0.1566  | 0.1675  | 0.5094  | 0.1344  | -0.1496 | 0.0173  | -0.0439 | 0.0167  | 0.5148  | -0.1699 | 0.3095  |
| PY00028 | -1.2183 | -0.6003 | -0.3398 | -0.022  | -0.8547 | 0.0096  | 0.0195  | 0.401   | 0.1918  | -0.1631 | 0.2103  | -0.6453 |
| PY01543 | 0.4286  | 0.4424  | 0.3939  | -0.8858 | -0.5523 | -0.2378 | 0.2871  | -0.3923 | 0.1425  | -0.4796 | -0.2575 | 0.4084  |
| PY07463 | 1.2944  | 0.6729  | 1.0003  | 0.0915  | -0.6884 | 0.2637  | 0.3335  | -0.226  | 0.3024  | -0.2092 | -0.9018 | 0.382   |
| PY02822 | -0.2518 | 0.3177  | 0.2534  | 0.032   | -0.2121 | -0.3201 | -0.0207 | -0.0343 | 0.1492  | 0.3246  | 0.4546  | 0.0638  |
| PY06329 | 0.2952  | 0.079   | 0.6545  | 0.3734  | 0.4695  | 0.3771  | 0.573   | -0.0249 | 0.1874  | 0.3244  | -0.3068 | 0.3062  |
| PY01647 | 0.5305  | 0.187   | 0.0582  | 0.0798  | 0.0915  | -0.0961 | 0.0934  | -0.1618 | -0.0025 | 0.0727  | -0.2057 | 0.0436  |
| PY00102 | 0.2623  | -0.1727 | -0.0812 | 0.1169  | 0.2152  | 0.2681  | 0.0419  | -0.0324 | -0.1239 | 0.2091  | -0.1862 | 0.4244  |



|         |         |         |         |         |         |         |         |         |         |         |         |         |
|---------|---------|---------|---------|---------|---------|---------|---------|---------|---------|---------|---------|---------|
| PY00818 | -1.2823 | -0.1711 | 0.0425  | -1.0065 | -0.9043 | -0.3551 | -0.1839 | 0.4037  | 0.1504  | -0.3855 | 0.5131  | -0.6011 |
| PY04484 | 0.1705  | -0.029  | 0.0204  | -0.0598 | 0.0136  | -0.2149 | -0.1278 | -0.0644 | -0.0701 | -0.3189 | -0.4843 | -0.1042 |
| PY02413 | 0.5059  | 0.2369  | 0.2521  | 0.4816  | -0.0505 | 0.098   | 0.2074  | 0.0322  | 0.1551  | -0.3445 | -0.1403 | 0.4729  |
| PY04856 | 0.155   | -0.0515 | -0.2159 | -1.0153 | -0.1161 | -0.0352 | -0.0245 | -0.1379 | -0.4029 | -0.1885 | -0.1978 | -0.3373 |
| PY02897 | -0.5257 | 0.0143  | 0.3359  | -0.3639 | -0.3618 | 0.0585  | 0.1348  | 0.1122  | 0.0873  | 0.0554  | -0.0245 | -0.0191 |
| PY04217 | 0.507   | 0.3221  | 0.5786  | 0.5604  | -0.2746 | -0.0367 | 0.2013  | -0.116  | 0.0977  | -0.3601 | -0.3079 | -0.1338 |
| PY01122 | 0.2198  | -0.0026 | 0.0117  | 0.2952  | -0.0528 | 0.1851  | 0.3097  | 0.0691  | 0.0488  | 0.1926  | -0.4142 | 0.473   |
| PY01518 | -0.8863 | -0.4021 | -0.1568 | -0.2117 | 0.6248  | 0.392   | 0.4612  | 0.1801  | 0.202   | 0.0663  | 0.3355  | 0.119   |
| PY02477 | 0.3483  | 0.2559  | 0.2585  | -0.2924 | -0.2274 | -0.0346 | 0.4064  | 0.0656  | 0.1087  | -0.2829 | -0.3504 | 0.4266  |
| PY04800 | 0.5197  | 0.2535  | 0.4207  | 0.2918  | -0.1089 | -0.045  | 0.534   | 0.0308  | 0.4909  | -0.0859 | -0.0317 | 0.4429  |
| PY05389 | -0.2401 | 0.1051  | 0.8077  | -0.5543 | -0.4114 | -0.0221 | 0.0203  | -0.0797 | 0.4075  | -0.5471 | -0.0037 | -0.0137 |
| PY03213 | -0.4843 | -0.4951 | -0.798  | 1.3319  | 0.9751  | -0.0433 | -0.0165 | 0.5669  | -0.0855 | 0.9122  | 0.9888  | 0.2374  |
| PY00704 | 1.2031  | 0.7287  | 0.6983  | 1.1083  | -0.2601 | 0.3076  | 0.5263  | -0.1857 | 0.0473  | 0.0978  | -0.8774 | 0.3651  |
| PY05204 | 0.0318  | 0.2573  | 0.2241  | 0.3775  | 0.744   | -0.2384 | 0.0288  | -0.0668 | -0.05   | -0.7368 | -0.1043 | -0.3587 |
| PY00732 | -0.6569 | -0.3983 | -0.2212 | 0.2286  | -0.2935 | -0.4114 | -0.4042 | -0.1939 | -0.5805 | 0.1138  | 0.2122  | -0.3166 |
| PY05334 | -0.1104 | 0.0187  | 0.0336  | 0.2407  | 0.145   | 0.127   | 0.0474  | 0.0533  | 0.4653  | 0.1755  | 0.9203  | 0.5794  |
| PY06565 | 0.1523  | -0.15   | -0.4125 | 0.5875  | 0.8454  | 0.0988  | 0.1524  | -0.1369 | -0.1977 | 0.5349  | 0.6733  | 0.4018  |
| PY02882 | 0.1896  | 0.159   | 0.2957  | 0.0925  | 0.3495  | 0.0079  | -0.0691 | -0.1275 | -0.2957 | -0.1004 | 0.2968  | 0.0642  |
| PY06325 | -0.1336 | 0.1813  | -0.0258 | -0.3036 | -0.4837 | 0.3178  | 0.2888  | -0.152  | 0.0577  | -1.0301 | -0.559  | -0.3326 |
| PY03502 | -0.5082 | -0.1443 | -0.1878 | -0.3392 | -0.0099 | -0.3715 | -0.1947 | 0.1473  | -0.0185 | 0.2702  | 0.4382  | 0.061   |
| PY00231 | -0.8941 | 0.0712  | 0.0751  | -0.2245 | -0.2379 | -0.4526 | -0.3007 | 0.0611  | -0.1273 | -0.332  | 0.4983  | -0.5794 |
| PY00357 | 0.1077  | 0.0131  | -0.0808 | 0.2252  | -0.0163 | 0.2332  | 0.171   | 0.2098  | 0.1418  | 0.1434  | -0.225  | -0.0869 |
| PY05626 | 0.146   | -0.0468 | -0.2014 | -0.3189 | -0.0279 | -0.1024 | 0.037   | -0.0917 | -0.041  | -0.4394 | -0.1504 | -0.224  |
| PY05359 | 0.5064  | 0.167   | 0.026   | 0.028   | 0.3007  | -0.0524 | -0.0576 | -0.0005 | -0.3303 | -0.1873 | 0.1893  | 0.0065  |
| PY01214 | 0.5138  | 0.1335  | 0.3305  | 0.3666  | 0.0783  | 0.143   | 0.0308  | -0.0529 | -0.1685 | 0.0191  | -0.4398 | 0.1735  |
| PY07364 | -0.6413 | -0.1394 | -0.1134 | -0.6958 | -0.0476 | 0.1196  | -0.0249 | 0.1215  | -0.1075 | -0.3052 | 0.2418  | -0.5259 |
| PY04599 | 0.6569  | 0.3556  | -0.692  | 0.3036  | 0.0703  | 0.1035  | 0.3204  | 0.2312  | -0.0097 | 0.5652  | -0.2585 | -0.2581 |
| PY02152 | -0.6493 | -0.1292 | 0.1913  | -0.3203 | 0.5088  | 0.0716  | -0.2389 | 0.06    | -0.2415 | 0.059   | 0.1772  | -0.2799 |
| PY04001 | 0.5431  | -0.2846 | -0.7074 | 0.4541  | 0.8807  | -0.0764 | -0.3832 | -0.2459 | -0.4539 | -0.2402 | -0.4966 | -0.4548 |
| PY03873 | -0.1305 | -0.195  | 0.1677  | 0.3713  | -0.0237 | -0.0036 | -0.213  | 0.1311  | -0.1355 | 0.25    | 0.0191  | -0.2717 |
| PY02302 | -0.446  | -0.1459 | -0.1718 | -0.3857 | -0.118  | -0.2508 | -0.1045 | -0.056  | -0.0258 | -0.6466 | -0.1683 | 0.2508  |
| PY01846 | 0.3894  | -0.0469 | 0.342   | -0.3767 | -0.4176 | -0.0091 | 0.0474  | 0.0414  | 0.3123  | 0.709   | -0.2211 | 0.559   |
| PY04885 | 0.3313  | 0.3434  | 0.2144  | 0.9478  | 0.8595  | 1.1986  | -0.0301 | 0.7037  | 0.1511  | 0.7517  | 0.6889  | 0.085   |
| PY02286 | -0.309  | -0.2806 | -0.0887 | -0.2297 | 0.4137  | 0.2114  | -0.0417 | -0.1415 | -0.1419 | -0.3136 | 0.2516  | -0.0285 |
| PY04454 | -0.2622 | -0.0403 | -0.0372 | 0.0627  | -0.3725 | -0.1579 | -0.0112 | 0.4286  | 0.1862  | 0.2752  | 0.0594  | 0.1799  |
| PY02971 | 0.1815  | 0.0995  | 0.0447  | -0.5928 | 0.1196  | -0.1468 | -0.0897 | -0.1821 | -0.0284 | -0.3844 | -0.2091 | -0.256  |
| PY05047 | -0.6795 | -0.833  | -0.508  | -0.3953 | 0.0134  | -0.166  | -0.0937 | 0.0949  | 0.2649  | 0.0661  | 0.5746  | -0.1178 |
| PY06844 | -0.0185 | 0.0769  | 0.0833  | 0.2991  | 0.4755  | -0.0137 | -0.0511 | 0.1721  | -0.2596 | 0.1453  | 0.1423  | 0.0822  |
| PY07540 | 0.0909  | 0.015   | 0.2498  | 0.0791  | -0.4704 | -0.1919 | 0.6015  | 0.3401  | 0.8363  | 0.0685  | -0.4023 | 0.8496  |
| PY04432 | -0.1402 | 0.0442  | 0.3354  | 0.2379  | -0.3971 | 0.0037  | 0.0014  | 0.1881  | 0.2122  | 0.2216  | -0.1512 | -0.0729 |
| PY05821 | 0.0425  | 0.0024  | -0.0196 | 0.2252  | 0.4734  | 0.2251  | 0.062   | 0.0306  | 0.3585  | 0.4685  | 0.5094  | 0.3632  |
| PY02404 | -0.487  | -0.3144 | -0.3601 | -0.6071 | -0.2349 | -0.2294 | 0.0363  | 0.3674  | 0.2419  | 0.2622  | 0.5045  | 0.0784  |
| PY03131 | 0.3336  | 0.1541  | 0.0934  | -0.3958 | -0.2013 | 0.1458  | 0.084   | -0.1765 | 0.2278  | -0.1392 | -0.5347 | 0.213   |
| PY01523 | 0.1145  | 0.0176  | -0.0107 | -0.3971 | 0.2898  | 0.2188  | 0.251   | -0.027  | 0.0123  | -0.1522 | 0.0082  | -0.1056 |
| PY06249 | 1.8503  | 1.5823  | 1.0401  | -0.0825 | -0.1819 | -0.5086 | 0.3894  | -0.1806 | 0.099   | -0.0422 | -0.4725 | -0.0681 |
| PY04703 | -0.799  | -0.4157 | -0.1589 | -0.3884 | -0.0638 | 0.1307  | -0.0761 | 0.2305  | -0.2288 | 0.0084  | 0.6955  | 0.0712  |
| PY07498 | -0.3307 | -0.1127 | -0.1513 | -0.3874 | 0.0869  | -0.3248 | -0.1027 | -0.1466 | -0.1373 | -0.1917 | 0.1603  | 0.2179  |
| PY03177 | 0.2393  | -0.2368 | -0.1765 | 0.5154  | 0.215   | -0.2536 | -0.119  | -0.0782 | 0.0178  | 0.1453  | 0.1811  | 0.1112  |
| PY02149 | -0.6191 | -0.3686 | -0.3009 | -0.4851 | 0.1047  | -0.075  | 0.0639  | -0.4737 | -0.2615 | -0.4831 | -0.1044 | -0.2863 |
| PY00258 | -0.1469 | -0.0508 | 0.047   | 1.2926  | -0.4935 | -0.4614 | -0.1657 | -0.0557 | 0.1489  | -0.4155 | 0.051   | -0.4874 |
| PY06073 | 0.1853  | 0.2376  | 0.0908  | -0.0738 | 0.1066  | 0.1317  | -0.0222 | -0.1955 | -0.1285 | 0.0625  | -0.1012 | -0.0651 |
| PY05545 | 0.4536  | 0.1047  | 0.2614  | 0.3264  | 0.4616  | 0.3433  | 0.1924  | 0.1277  | 0.1317  | 0.8896  | 0.0432  | 0.4514  |
| PY04116 | -0.2299 | -0.0855 | 0.0071  | -0.4469 | -0.3454 | -0.3904 | -0.0217 | -0.1793 | 0.0655  | -0.0774 | 0.1701  | 0.1981  |
| PY05814 | 0.2137  | 0.0826  | 0.2018  | 0.2942  | 0.0176  | 0.1141  | -0.0606 | 0.1375  | -0.1279 | 0.0233  | 0.1343  | -0.1291 |
| PY06704 | 0.8807  | 0.4443  | 0.4048  | 0.485   | 0.2817  | -0.2151 | 0.0241  | -0.4377 | -0.2113 | -0.2419 | -0.2832 | -0.0495 |
| PY01233 | 0.0384  | 0.0443  | -0.0381 | 1.1103  | 0.4375  | 0.0252  | -0.0932 | 0.1985  | -0.1471 | 0.6342  | -0.0776 | -0.0553 |
| PY01182 | 0.0169  | -0.062  | -0.1827 | 0.2102  | -0.0361 | -0.2901 | -0.5004 | -0.1305 | -0.34   | -0.1077 | 0.2693  | -0.5584 |
| PY05663 | 0.019   | -0.0831 | -0.0802 | 0.0482  | -0.0245 | 0.3445  | 0.2042  | 0.1727  | 0.1112  | 0.2838  | -0.1507 | -0.3955 |
| PY05541 | -0.3339 | -0.2555 | 0.0214  | -0.8109 | -0.2048 | -0.0503 | -0.0725 | -0.014  | 0.1733  | 0.0374  | 0.0432  | 0.068   |
| PY00856 | -0.1624 | 0.0645  | -0.1087 | 0.0872  | -0.4485 | -0.4077 | -0.2919 | 0.0337  | -0.1666 | -0.417  | 0.7314  | -0.3774 |
| PY06979 | -0.084  | -0.0515 | -0.2154 | 0.4817  | 0.0905  | -0.0823 | -0.0224 | 0.2991  | 0.0437  | 0.3724  | 0.345   | 0.7386  |
| PY04178 | 0.0404  | -0.0284 | -0.0396 | 0.1782  | 0.277   | 0.1972  | 0.3086  | 0.139   | 0.0582  | -0.2163 | -0.0724 | -0.0754 |
| PY01811 | 0.8241  | 0.5495  | 0.0832  | 0.4391  | 0.101   | 0.1057  | 0.0754  | -0.0594 | -0.0978 | -0.2075 | -0.2369 | -0.1768 |

|         |         |         |         |         |         |         |         |         |         |         |         |         |
|---------|---------|---------|---------|---------|---------|---------|---------|---------|---------|---------|---------|---------|
| PY05642 | 0.1482  | 0.1139  | 0.2075  | -0.1926 | -0.1098 | 0.4278  | 0.1651  | 0.13    | 0.211   | 0.1189  | -0.1858 | -0.188  |
| PY04659 | 0.4487  | 0.1301  | 0.1646  | -0.1802 | -0.1565 | -0.0319 | 0.1542  | -0.4749 | -1.3815 | -0.2652 | -0.6091 | -0.1607 |
| PY07558 | -0.5366 | -0.1114 | 0.0942  | -0.0247 | -0.3999 | -0.129  | 0.1237  | -0.1442 | 0.2369  | -0.0285 | 0.3096  | -0.0308 |
| PY05171 | -0.4828 | -0.5683 | -0.6011 | 0.2392  | 0.4739  | 0.0885  | -0.2478 | 0.1284  | -0.1913 | 0.0958  | 0.2113  | 0.0155  |
| PY05786 | -0.6754 | -0.1797 | 0.2768  | -0.6252 | 0       | 0.1301  | -0.182  | -0.095  | -0.139  | -0.2893 | 0.1562  | -0.4523 |
| PY00503 | -0.6833 | -0.3395 | -0.0716 | -0.5433 | 0.3193  | 0.0695  | -0.1269 | 0.0205  | 0.0011  | -0.1379 | 0.2877  | -0.1699 |
| PY00889 | -0.4513 | -0.2518 | -0.2934 | 0.22    | -0.0127 | -0.098  | -0.1351 | 0.1575  | 0.3915  | 0.1918  | 0.4919  | 0.1381  |
| PY02147 | -0.1235 | -0.2388 | -0.3878 | 0.1263  | 0.0905  | 0.1904  | 0.0598  | 0.3964  | -0.0073 | 0.1691  | -0.0583 | -0.3562 |
| PY04016 | -0.2287 | 0.0777  | 0.407   | 0.3148  | 0.3102  | 0.1915  | -0.0031 | 0.0909  | 0.2493  | 0.4519  | 0.2657  | 0.0551  |
| PY03489 | 0.0884  | -0.0926 | -0.088  | 0.7984  | -0.1408 | -0.2088 | -0.3046 | 0.6135  | 0.013   | 0.8174  | 0.4866  | -0.3523 |
| PY05037 | -0.9559 | -0.128  | 0.2846  | 0.7452  | -0.3909 | -0.4103 | 0.0042  | 0.4174  | 0.3694  | -0.0507 | 0.8603  | -0.2014 |
| PY06708 | 0.2534  | -0.0881 | -0.217  | -0.1992 | 0.0778  | 0.1638  | 0.0339  | 0.0917  | -0.0169 | 0.1836  | 0.1113  | -0.1116 |
| PY00460 | 0.7294  | 0.3133  | -0.0316 | -0.0705 | -0.177  | -0.1888 | -0.1854 | -0.4821 | -0.4321 | -0.705  | -0.6156 | -0.273  |
| PY05255 | -0.7782 | -0.0639 | 0.2819  | 1.307   | -0.1533 | -0.1237 | 0.0386  | 0.3042  | 0.0533  | 0.2292  | 0.3228  | -0.152  |
| PY04636 | -0.0357 | -0.0186 | 0.3202  | -0.4099 | 0.3654  | 0.1451  | -0.0487 | 0.0551  | 0.4163  | -0.3732 | -0.2355 | 0.2944  |
| PY04689 | -0.4544 | -0.01   | 0.0611  | -0.0962 | 0.0932  | -0.0548 | -0.0839 | -0.155  | 0.0955  | 0.2341  | 0.3764  | 0.1688  |
| PY02984 | -0.2732 | -0.0288 | -0.3482 | 0.2548  | 0.8312  | 0.2258  | -0.0128 | 0.2601  | 0.0345  | 0.4174  | 0.3389  | 0.0822  |
| PY07111 | -0.5011 | -0.2519 | -0.3429 | -0.4185 | 0.2592  | 0.0688  | -0.0953 | -0.0808 | -0.1749 | -0.324  | 0.0656  | -0.3756 |
| PY04371 | 0.3788  | -0.0013 | 0.1175  | -0.2696 | -0.0118 | -0.0429 | -0.0405 | -0.1122 | -0.0853 | -0.7015 | 0.0307  | 0.1728  |
| PY02237 | 0.2377  | -0.0903 | 0.0628  | 0.0785  | 0.2037  | -0.0552 | -0.1545 | -0.102  | -0.009  | 0.1064  | -0.045  | -0.0274 |
| PY03784 | 0.8673  | 0.3911  | 0.7693  | 0.251   | 0.0913  | 0.1159  | 0.3975  | -0.0504 | 0.2049  | 0.0562  | -0.1009 | 0.3     |
| PY04652 | -0.4719 | -1.2101 | -1.6353 | 0.7572  | 0.6865  | -0.0586 | -0.4888 | 0       | -0.2318 | 0.0586  | 0       | 0.0505  |
| PY04488 | -0.4197 | -0.0868 | 0.1308  | -0.2501 | -0.1434 | 0.0952  | -0.0375 | 0.0414  | 0.0389  | -0.1925 | 0.0442  | -0.053  |
| PY06925 | -0.5611 | -0.2956 | -0.3466 | -0.3646 | -0.0093 | 0.0152  | -0.1086 | -0.0517 | 0.1582  | 0.1625  | 0.1955  | 0.1738  |
| PY04838 | 0.5264  | 0.103   | 0.1165  | 0.414   | 0.5193  | 0.2072  | -0.0529 | -0.0122 | -0.2713 | 0.1742  | 0.3329  | -0.1168 |
| PY01129 | 0.3603  | 0.2556  | -0.1088 | -0.025  | 0.3064  | 0.1439  | 0.2222  | 0.3337  | 0.0393  | 0.0562  | 0.4589  | -0.0546 |
| PY07431 | -0.1909 | -0.0348 | -0.1692 | -0.1031 | 0.0922  | -0.5812 | -0.3178 | -0.3793 | -0.2301 | -0.1889 | 0.0016  | -0.3452 |
| PY03993 | -0.2151 | 0.0464  | -0.3345 | 0.0609  | -0.0683 | -0.2153 | -0.2917 | -0.028  | 0.2164  | -0.1972 | 0.1223  | -0.338  |
| PY00262 | -0.3476 | -0.4846 | -0.3764 | 1.3017  | 0.2354  | -0.0561 | -0.0556 | 0.438   | -0.1826 | 0.4339  | 0.7602  | 0.1714  |
| PY06746 | 0.2308  | 0.2375  | 0.1657  | -0.1334 | 0.3762  | 0.0139  | 0.2519  | 0.2603  | 0.0549  | -0.0704 | 0.4139  | 0.2753  |
| PY06217 | -0.9152 | -0.3714 | -0.4532 | -0.6098 | -0.3251 | -0.3702 | -0.0585 | 0.3068  | 0.0735  | 0.1718  | 0.8136  | -0.2852 |
| PY07239 | 0.3052  | 0.3764  | 0.2557  | 0.3929  | 0.8802  | 0.5392  | 0.4217  | 0.4815  | 0.1613  | 0.5498  | 1.1154  | 0.4847  |
| PY03867 | 0.5205  | 0.4197  | 0.5639  | -0.5654 | -0.2761 | -0.0588 | 0.5195  | -0.2396 | 0.5834  | -0.1963 | -0.4255 | 0.5884  |
| PY07441 | -0.0106 | -0.1249 | -0.0719 | -0.1457 | 0.1765  | -0.1215 | 0.0656  | -0.1308 | 0.2     | -0.408  | 0.2843  | -0.2847 |
| PY00300 | 0.0276  | -0.0636 | -0.1015 | -0.2805 | 0.2278  | 0.1327  | 0.1786  | -0.0292 | -0.0569 | -0.2047 | 0.0826  | 0.1187  |
| PY00841 | 0.0569  | 0.117   | 0.0647  | -0.5664 | -0.2232 | 0.1187  | -0.0464 | -0.1514 | -0.1026 | -0.1475 | -0.2925 | 0.201   |
| PY03979 | -0.4014 | -0.0506 | -0.0266 | -0.4758 | 0.2567  | 0.0338  | -0.1091 | -0.1643 | -1.2574 | -0.2295 | 0.0949  | -0.155  |
| PY05966 | -0.0741 | -0.1686 | 0.4139  | -0.1415 | -0.0173 | -0.4259 | 0.0405  | 0.0446  | 0.088   | 0.0243  | 0.0769  | -0.1348 |
| PY03912 | 0.0924  | 0.0278  | 0.0767  | 0.272   | 0.3326  | 0.1467  | -0.2846 | -0.4709 | -0.3078 | -0.2979 | -0.4991 | -0.2319 |
| PY02473 | 0.0869  | -0.0216 | -0.0734 | 0.0634  | 0.2831  | 0.001   | -0.3415 | -0.4015 | -0.424  | -0.1145 | 0.0739  | -0.3582 |
| PY00044 | -0.6897 | -0.3741 | -0.1414 | -0.2716 | -0.1963 | -0.5503 | -0.384  | -0.111  | -0.5348 | 0.1663  | 0.0862  | -0.252  |
| PY02579 | -0.0954 | -0.1084 | -0.1915 | -0.4271 | -0.4762 | 0.0783  | -0.0407 | -0.3015 | -0.3602 | -0.241  | -0.217  | -0.1946 |
| PY02179 | 0.2136  | -0.0472 | 0.1524  | -0.0921 | -0.0463 | -0.1907 | 0.1345  | -0.3245 | -0.2121 | -1.8117 | -0.1598 | -0.0458 |
| PY02537 | 0.0613  | -0.0607 | -0.2099 | 0.2483  | -0.097  | -0.1184 | 0.0584  | -0.1068 | -0.129  | -0.0691 | 0.1348  | -0.3428 |
| PY02922 | -0.103  | 0.2627  | 0.0588  | 0.0047  | 0.1059  | -0.2123 | -0.1394 | 0.0785  | 0.139   | -0.1333 | 0.0756  | -0.3158 |
| PY04743 | -0.0823 | -0.2157 | -0.3059 | 0.2846  | -0.1791 | -0.1442 | 0.0375  | 0.1089  | -0.006  | 0.1342  | -0.1009 | 0.5635  |
| PY03155 | 0.2351  | 0.0751  | 0.5267  | -0.4329 | -0.1894 | 0.3641  | 0.3584  | -0.1322 | 0.2162  | -0.2003 | -0.461  | 0.096   |
| PY06887 | 0.1652  | -0.1166 | -0.0241 | 0.0877  | 0.1121  | -0.1899 | -0.1843 | 0.0737  | 0.0082  | -0.1538 | -0.0349 | -0.198  |
| PY00949 | -0.6632 | -0.3757 | -0.002  | 0.556   | 0.2154  | -0.0331 | -0.1444 | -0.1128 | -0.2926 | 0.0414  | 0.0458  | -0.1548 |
| PY07037 | -0.0841 | 0.1234  | -0.0615 | 0.116   | 0.0459  | 0.1721  | 0.1441  | 0.3039  | 0.1077  | 0.1399  | 0.1324  | -0.068  |
| PY03526 | -0.4883 | -0.6104 | -0.4753 | 0.2938  | 0.0086  | 0.1404  | -0.0951 | 0.2243  | -0.0396 | -0.3334 | 0.2137  | 0.4325  |
| PY03706 | 0.2409  | 0.0566  | -0.6397 | 0.2957  | 0.4351  | 0.2139  | 0.0393  | 0.0889  | -0.2712 | 0.1361  | 0.1256  | -0.1391 |
| PY03728 | 0.2719  | 0.2258  | 0.2078  | -0.1119 | 0.0186  | 0.32    | 0.3518  | 0.1504  | 0.0171  | -0.3417 | -0.3473 | -0.0623 |
| PY01743 | 0.4517  | 0.2036  | 0.1517  | 0.0833  | -0.1585 | -0.0505 | 0.2399  | 0.0262  | 0.2548  | -0.132  | -0.4911 | 0.2314  |
| PY05666 | -0.4317 | -0.0602 | -0.1794 | -0.4015 | -0.0842 | 0.1832  | 0.1265  | 0.2385  | 0.1175  | -0.1033 | -0.2355 | 0.2221  |
| PY05079 | -1.7899 | -0.5443 | -0.7426 | -1.0453 | -0.3837 | -0.7302 | -0.4716 | 0.2363  | 0.1368  | -0.602  | 0.3365  | -0.2798 |
| PY04864 | 0.0854  | 0.0652  | 0.0448  | -0.1604 | -0.1813 | -0.4625 | 0.0983  | -0.0468 | 0.2152  | 0.128   | -0.1298 | 0.4293  |
| PY02194 | 0.1493  | -0.0716 | -0.022  | 0.0381  | 0.0979  | -0.2551 | -0.0414 | 0.1712  | 0.0002  | 0.1524  | 0.0644  | 0.1527  |
| PY02725 | 0.6743  | 0.0539  | 0.4012  | 0.405   | 0.1835  | 0.0657  | -0.1011 | -0.3246 | 0.0745  | -0.0153 | -0.7682 | 0.0049  |
| PY07598 | 0.8547  | 0.4638  | 0.8107  | 0.6034  | -0.2375 | -0.019  | 0.112   | -0.2591 | 0.3629  | 0.1776  | -0.3045 | 0.2746  |
| PY05802 | -0.2036 | -0.1131 | -0.254  | 0.2499  | 0.7526  | 0.2493  | -0.0796 | 0.2069  | -0.2118 | 0.2669  | 0.0488  | 0.2396  |
| PY05417 | 0.3052  | 0.0847  | 0.3534  | -0.0732 | -0.2005 | 0.0664  | -0.1653 | -0.1514 | 0.1281  | -0.1121 | -0.4055 | 0.0424  |
| PY05790 | 0.1974  | 0.2334  | 0.2742  | -0.0756 | -0.1818 | -0.0415 | 0.1992  | -0.1838 | -0.0915 | -0.1291 | -0.062  | 0.1044  |

|         |         |         |         |         |         |         |         |         |         |         |         |         |
|---------|---------|---------|---------|---------|---------|---------|---------|---------|---------|---------|---------|---------|
| PY00521 | -0.6415 | -0.2008 | -0.0843 | 0.0643  | 0.2166  | -0.0602 | 0.1915  | 0.3781  | 0.4155  | 0.5477  | 1.1532  | 0.4138  |
| PY02801 | 0.293   | 0.2339  | -0.0344 | -0.5216 | -0.2911 | -0.1617 | 0.1508  | 0.1899  | 0.4458  | -0.3867 | -0.0133 | 0.4046  |
| PY05140 | 0.1618  | -0.0723 | 0.0252  | 0.1257  | -0.0595 | -0.0851 | 0.0062  | -0.1182 | 0.0459  | 0.1597  | 0.0826  | 0.2485  |
| PY02727 | 0.5385  | 0.2951  | 0.4002  | 0.5116  | 0.3435  | -0.0319 | 0.0636  | 0.0532  | 0.14    | 0.4919  | -0.6639 | -0.0938 |
| PY01960 | -0.0985 | -0.0721 | -0.3321 | 0.2974  | 0.5054  | 0.227   | 0.1203  | -0.1259 | -0.0643 | 0.0027  | 0.1389  | 0.1107  |
| PY05091 | -0.0787 | -0.3179 | -0.032  | 0.8402  | -0.0354 | -0.2493 | -0.3047 | 0.1953  | 0.1459  | -0.0264 | -0.1228 | 0.3706  |
| PY02053 | -0.7133 | -0.7286 | -0.5666 | -0.0124 | -0.4622 | -0.0638 | 0.1208  | 0.8221  | 0.4914  | 0.6334  | 0.8794  | 0.2749  |
| PY05905 | 0.5168  | -0.0088 | -0.1556 | 0.0291  | 0.1424  | 0.0007  | -0.138  | -0.2755 | -0.1301 | -0.2862 | -0.2873 | 0.0555  |
| PY06144 | -0.0515 | -0.1101 | 0.0507  | -0.8313 | -0.3328 | -0.1234 | 0.0546  | -0.634  | 0.3077  | -0.5569 | -0.3678 | 0.1456  |
| PY07101 | 0.8275  | 0.272   | -0.0108 | 0.5871  | 0.1051  | 0.3068  | 0.3486  | 0.1355  | 0.0996  | 0.2209  | -0.1449 | 0.2907  |
| PY00740 | -0.1399 | 0.0045  | 0.4199  | 0.0497  | 0.0206  | -0.1122 | -0.3071 | -0.1106 | 0.0015  | -0.4985 | 0.2542  | -0.3467 |
| PY04458 | -0.426  | -0.3321 | -0.1594 | -0.3829 | -0.0165 | -0.1756 | -0.0908 | -0.1262 | 0.0757  | -0.1999 | 0.0983  | 0.2679  |
| PY02329 | 0.6206  | 0.378   | 0.2975  | -0.1284 | 0.0165  | 0.1176  | 0.2925  | -0.3391 | -0.0993 | -0.1881 | -0.2382 | 0.1052  |
| PY07222 | -0.1442 | -0.132  | 0.1039  | -0.1583 | 0.0062  | -0.0954 | 0.0479  | 0.0193  | -0.2422 | -0.1626 | -0.1213 | -0.1276 |
| PY00809 | 0.2068  | -0.3843 | -0.5348 | 0.0473  | 0.4101  | -0.0706 | -0.1567 | 0.2227  | 0.2258  | 0.4394  | 0.3479  | 0.5445  |
| PY05848 | -0.4526 | -0.191  | 0.0808  | -0.3296 | -0.3048 | -0.2617 | -0.2231 | -0.1698 | 0.0897  | 0.0255  | -0.1162 | 0.3582  |
| PY06424 | -0.316  | 0.0021  | 0.1547  | -0.0978 | 0.0698  | -0.1879 | -0.4131 | -0.3773 | -0.2176 | -0.2766 | -0.002  | -0.4055 |
| PY05075 | -1.195  | -0.8517 | -1.0473 | -0.7345 | -0.4478 | -0.4971 | -0.0413 | 0.8331  | 0.2868  | -0.0147 | 0.4314  | -0.0517 |
| PY05284 | 0.6392  | 0.4194  | 1.0858  | 0.3387  | -0.0816 | 0.1459  | 0.2388  | -0.4306 | 0.0087  | -0.4638 | -0.8977 | -0.0457 |
| PY01033 | -0.1526 | 0.0558  | -0.3977 | -1.1337 | -0.7899 | -0.5392 | -0.1119 | 0.1268  | 0.0159  | -0.3005 | 0.1749  | -0.4756 |
| PY02337 | 0.13    | -0.1697 | -0.2028 | 0.084   | 0.4336  | 0.0205  | -0.107  | -0.0305 | -0.0559 | 0.1767  | 1.22    | 0.0655  |
| PY05162 | -0.0649 | 0.072   | 0.1857  | -0.1057 | 0.0839  | 0.1006  | 0.0207  | 0.1055  | -0.3167 | -0.2531 | -0.2206 | -0.1028 |
| PY00247 | -0.1449 | -0.1126 | -0.241  | -0.1678 | -0.3093 | 0.0415  | -0.1131 | 0.2409  | 0.2186  | 0.1529  | -0.2228 | -0.0567 |
| PY04765 | 0.4407  | 0.2899  | 0.59    | 0.2865  | -0.2119 | 0.0567  | 0.5534  | 0.0888  | 0.3437  | 0.4272  | -0.3597 | 0.9996  |
| PY03280 | -0.8226 | -0.4917 | -0.4348 | -0.157  | 0.1923  | -0.1657 | -0.38   | -0.0281 | -0.2981 | 0.297   | 0.1555  | -0.099  |
| PY05338 | -0.72   | 0.6552  | 0.1507  | 0.1772  | -0.1471 | 0.1015  | 0.0987  | 0.1097  | 0.0718  | 0.2366  | 0.7291  | -0.2552 |
| PY07152 | -0.2266 | 0.0083  | 0.0962  | 1.2965  | 0.9347  | 1.5686  | -0.0678 | 0.7892  | 0.1182  | 1.3427  | 0.6093  | -0.3128 |
| PY06037 | -0.5515 | -0.4628 | -0.5106 | -0.1655 | 0.4465  | -0.0718 | -0.1981 | 0.0871  | -0.0471 | 0.1939  | 0.0169  | -0.1186 |
| PY02488 | -0.4336 | -0.1896 | -0.6438 | 0.3655  | 0.5309  | 0.0573  | -0.1465 | 0.1573  | -0.3245 | 0.5673  | 0.6801  | -0.0033 |
| PY02453 | 0.2091  | 0.0025  | -0.0487 | 0.4081  | -0.3334 | -0.1761 | -0.1529 | -0.3365 | -0.139  | -0.3344 | -0.3711 | 0.0323  |
| PY02766 | 0.1561  | 0.0077  | 0.0534  | -0.1457 | -0.0279 | -0.2121 | -0.0085 | 0.1237  | 0.0343  | -0.465  | -0.0223 | 0.1943  |
| PY05195 | -0.6022 | -0.2766 | 0.2361  | -0.147  | -0.0372 | -0.3673 | -0.3658 | 0.0538  | -0.2043 | 0.3962  | 0.2429  | 0.0872  |
| PY07116 | -0.7853 | -0.222  | -0.0382 | 0.3435  | 0.1886  | -0.129  | -0.1199 | 0.2045  | 0.1832  | 0.2849  | 0.3536  | -0.3377 |
| PY02438 | -0.2639 | -0.3903 | -0.4196 | -0.0836 | 0.1315  | -0.0546 | 0.0128  | -0.142  | -0.257  | 0.7109  | 0.3766  | 0.423   |
| PY03577 | -0.2872 | -0.0189 | -0.5867 | -0.5525 | -0.2993 | 0.0609  | 0.135   | 0.2321  | 0.1157  | -0.3953 | 0.2342  | -0.2803 |
| PY06576 | 0.4851  | 0.2166  | 0.163   | -0.1023 | 0.169   | -0.0303 | -0.1366 | -0.1888 | -0.103  | 0.1205  | 0.2695  | 0.2479  |
| PY07176 | 0.0461  | 0.2413  | 0.6294  | 0.0695  | -0.2426 | 0.2325  | 0.6726  | 0.206   | 0.53    | 0.375   | -0.3605 | 0.6473  |
| PY04826 | 0.1177  | -0.0317 | 0.1435  | -0.2642 | 0.0399  | -0.2063 | 0.0228  | -0.6939 | -0.7744 | -0.5442 | 0.702   | -0.1269 |
| PY03899 | -0.1057 | -0.017  | 0.1336  | -0.2524 | 0.273   | 0.1089  | -0.1028 | 0.33    | -0.0168 | 0.1857  | 0.4763  | 0.1264  |
| PY06451 | -0.7988 | -0.2727 | -0.3759 | -0.0903 | -0.1577 | -0.3012 | -0.2053 | 0.3421  | 0.1892  | 0.1395  | 0.3882  | 0.023   |
| PY03801 | -0.6606 | -0.2106 | -0.1647 | 0.0579  | 0.1579  | -0.0066 | -0.3142 | -0.2636 | -0.239  | -0.2267 | -0.0763 | -0.2654 |
| PY02707 | -0.1253 | -0.159  | -0.435  | 1.1422  | 0.5116  | 0.2332  | -0.0914 | 0.1126  | -0.632  | -0.3281 | 0.1172  | 0.1236  |
| PY03652 | -0.5917 | -0.5586 | -0.1974 | -0.2667 | -0.4048 | -0.2797 | -0.0969 | 0.1872  | 0.2354  | 0.2     | 0.1358  | -0.2556 |
| PY06106 | -0.3012 | -0.4288 | -0.2369 | -0.0328 | 0.3038  | 0.1199  | 0.014   | 0.0531  | 0.4367  | 0.2989  | 0.0617  | 0.0908  |
| PY05836 | 0.5864  | 0.1545  | 0.4611  | 0.6256  | -0.3047 | -0.0549 | 0.3489  | -0.351  | 0.3963  | -0.3395 | -0.4167 | 0.0143  |
| PY04615 | -0.4974 | -0.3223 | 0.1194  | -0.0964 | 0.4414  | -0.2661 | -0.1448 | 0.0593  | -1.5637 | 0.1922  | 0.1336  | -0.4402 |
| PY06014 | 0.6489  | 0.2294  | -0.0557 | 0.1753  | 0.0039  | -0.2035 | -0.0183 | -0.1348 | -0.7302 | 0.0661  | 0.0872  | 0.1391  |
| PY06332 | -0.9849 | -0.3568 | 0.1215  | -1.0033 | -1.2002 | -0.1895 | 0.04    | 0.2529  | 0.645   | 0.0171  | 0.5794  | 0.18    |
| PY06359 | 0.154   | -0.0801 | -0.1631 | -1.1222 | -0.223  | -0.1956 | -0.0858 | -0.1272 | -0.0977 | -0.3805 | 0.0077  | 0.0338  |
| PY06164 | 0.1692  | -0.0177 | 0.0925  | -0.2181 | -0.0766 | 0.2716  | 0.1102  | -0.2192 | -0.1271 | -0.2119 | -0.5244 | 0.2389  |
| PY06138 | -0.945  | -0.1501 | -0.1882 | -0.0916 | -0.4033 | 0.0181  | 0.0905  | 0.3909  | -0.1256 | -0.7256 | 0.3158  | -0.6879 |
| PY03581 | -0.5068 | -0.2424 | -0.2025 | 0.5294  | 0.2302  | 0.17    | -0.1435 | 0.3821  | 0.142   | 0.5958  | 0.1261  | 0.2179  |
| PY02823 | -1.9878 | -0.8665 | -0.476  | -1.7221 | -1.3346 | -0.5575 | 0.0734  | 0.64    | 0.4137  | 0.1079  | 1.0209  | -0.3539 |
| PY03332 | 0.673   | 0.4317  | 0.3783  | -0.3931 | -0.298  | -0.302  | -0.125  | -0.3769 | 0.0225  | -0.4118 | -0.6518 | -0.595  |
| PY03985 | 0.2611  | -0.038  | -0.0269 | -0.0396 | 0.4635  | 0.0783  | -0.1654 | -0.2482 | -0.5876 | -0.0326 | -0.0545 | -0.7117 |
| PY03113 | -0.1459 | 0.1107  | -0.1547 | -0.6497 | -0.2976 | -0.4028 | -0.127  | 0.251   | -0.0015 | 0.201   | -0.1659 | -0.258  |
| PY03125 | 0.7309  | 0.2828  | 0.2862  | 0.0716  | -0.0857 | -0.1818 | 0.0049  | -0.1319 | 0.2299  | 0.0938  | -0.2419 | 0.3689  |
| PY06380 | -0.8588 | -0.0223 | 0.4038  | -0.1928 | -0.0478 | -0.2023 | -0.183  | -0.1286 | 0       | -0.3733 | 0.1362  | -0.4707 |
| PY02557 | -0.0914 | -0.049  | -0.12   | 0.11    | 0.0679  | -0.2323 | -0.1386 | -0.2945 | -0.2206 | 0.0214  | 0.0728  | -0.0903 |
| PY07492 | 0.0091  | -0.7949 | -0.5842 | -0.4655 | -0.021  | -0.2619 | -0.1954 | 0.0011  | 0.0457  | 0.1194  | -0.1232 | 0.157   |
| PY05566 | 0.2188  | 0.2397  | 0.2638  | -0.2888 | -0.3852 | -0.2899 | -0.139  | -0.3019 | -0.132  | -0.3388 | -0.0804 | -0.1198 |
| PY00015 | -0.0675 | -0.3845 | -0.3446 | -0.1393 | -0.0328 | -0.1195 | 0.3082  | -0.243  | 0.2435  | 0.0193  | 0.6673  | -0.267  |
| PY07259 | -0.341  | -0.2381 | -0.1328 | 0.3444  | 0.244   | -0.2577 | -0.1471 | -0.3137 | -0.1614 | -0.0208 | 0.1858  | 0.0396  |

|         |         |         |         |         |         |         |         |         |         |         |         |         |
|---------|---------|---------|---------|---------|---------|---------|---------|---------|---------|---------|---------|---------|
| PY02445 | -0.8216 | -0.337  | -0.3131 | -0.4673 | -0.7586 | -0.5399 | -0.315  | -0.0291 | -0.0244 | 0.3315  | 0.3716  | -0.2079 |
| PY00882 | 0.1918  | 0.0225  | -0.1117 | 0.1384  | 0.1095  | -0.1202 | -0.2392 | 0.2689  | 0.3544  | 0.1893  | -0.0556 | -0.3421 |
| PY04054 | -0.0471 | -0.4599 | -0.2548 | -0.1172 | 0.6524  | 0.0323  | 0.0222  | -0.187  | -0.2923 | -0.0819 | -0.0829 | 0.1245  |
| PY06067 | -0.1173 | -0.0353 | 0.1044  | -0.2725 | -0.2051 | 0.2004  | 0.2745  | 0.2952  | 0.4717  | 0.1059  | 0.1384  | 0.2894  |
| PY01812 | -0.3483 | -0.2893 | 0.0311  | 0.1755  | 0.5615  | -0.2317 | 0.0429  | 0.4411  | -0.0659 | 0.0646  | 0.6439  | 0.1726  |
| PY02673 | -0.6171 | 0.0386  | -0.0636 | -0.4592 | -0.1728 | -0.2406 | -0.3308 | 0.0274  | 0.1449  | -0.0455 | 0.3125  | -0.1296 |
| PY01996 | 0.2058  | 0.1195  | 0.2621  | -0.2832 | -0.4901 | -0.2226 | -0.1131 | -0.2249 | -0.2311 | -0.3192 | -0.2634 | 0.0244  |
| PY03631 | 0.4979  | 0.4962  | -0.2522 | -0.159  | 0.0673  | 0.3574  | 0.2914  | -0.1193 | 0.1845  | 0.0051  | -0.2052 | 0.4617  |
| PY03682 | -0.8242 | -0.1937 | -0.2118 | 0.0521  | 0.0638  | -0.4166 | -0.2691 | -0.2897 | -0.0702 | -0.4119 | 0.3881  | -0.2311 |
| PY02581 | 0.8013  | 0.229   | 0.1537  | 0.0592  | -0.1452 | -0.1129 | -0.1539 | -0.3341 | -0.2216 | -0.1018 | -0.5131 | -0.0492 |
| PY03339 | -0.0958 | 0.1895  | 0.2648  | -0.4119 | -0.3178 | -0.0632 | -0.1514 | -0.3521 | 0.0897  | 0.0433  | -0.0043 | 0.0764  |
| PY01321 | 0.3913  | 0.5425  | 0.4649  | -0.0732 | 0.1069  | -0.0776 | 0.0776  | -0.4559 | -0.183  | -0.0826 | -0.2746 | 0.3029  |
| PY03814 | 0.3709  | -0.4213 | -0.003  | 0.3186  | 0.153   | 0.0091  | -0.0692 | -0.1614 | -0.3053 | 0.1574  | -0.005  | -0.0539 |
| PY02006 | 0.0766  | -0.196  | -0.7154 | 0.2414  | 0.1187  | 0.0063  | 0.2051  | 0.3059  | 0.4328  | 0.5383  | 0.533   | 0.5059  |
| PY00383 | 0.018   | -0.0145 | -0.2153 | -0.2148 | -0.1395 | -0.1293 | -0.0456 | -0.458  | 0.0963  | -0.3378 | 0.0225  | 0.3423  |
| PY00657 | -0.425  | 0.1491  | 0.3838  | -1.0202 | -0.0908 | -0.0239 | 0.1632  | -0.5736 | -0.0669 | -0.5223 | -0.3036 | 0.0393  |
| PY01377 | 0.3722  | 0.0064  | -0.2161 | 0.04    | 0.2845  | 0.26    | -0.3299 | -0.0886 | 0.0589  | 0.0546  | -0.1122 | -0.0251 |
| PY04035 | 0.6833  | 0.3587  | 0.0694  | -0.4657 | 0.1978  | 0.3172  | 0.4897  | 0.3325  | 0.2858  | -0.3546 | -0.1416 | 0.2683  |
| PY04757 | 1.3343  | 0.8571  | 1.5493  | 0.4965  | -0.1397 | -0.106  | 0.3514  | -0.3321 | 0.1114  | -0.5863 | -1.2513 | 0.1572  |
| PY05422 | -1.4685 | -0.2452 | 0.3798  | -0.4917 | -0.5436 | -0.2521 | -0.187  | 0.1786  | 0.1168  | 0.3236  | 0.8757  | -0.1951 |
| PY03242 | -0.4476 | 0.025   | 0.2401  | -0.7642 | -0.484  | -0.4392 | -0.0012 | -0.1445 | 0.1248  | -0.1427 | 0.3623  | -0.1153 |
| PY02771 | 0.4377  | 0.0538  | 0.1592  | 0.3792  | 0.1296  | -0.1082 | -0.123  | -0.1783 | -0.1559 | -0.0463 | -0.4101 | 0.025   |
| PY07197 | -1.4731 | -0.523  | -0.0049 | -0.1528 | -0.1034 | -0.1703 | -0.001  | -0.0803 | 0.1102  | 0.5063  | 0.5275  | -0.2026 |
| PY01858 | 0.5804  | 0.2642  | -0.1871 | 0.7598  | 0.5053  | 0.0753  | -0.0749 | -0.1371 | -0.1333 | -0.0736 | -0.3582 | 0.0722  |
| PY02153 | 0.0492  | -0.0195 | -0.1873 | 2.2527  | 1.9914  | 1.309   | 0.0981  | 1.3508  | -0.0916 | 1.901   | 1.1793  | 0.0207  |
| PY06125 | 0.3764  | 0.1081  | 0.2675  | -0.1065 | -0.2017 | 0.142   | 0.2332  | -0.096  | 0.213   | -0.1077 | -0.2867 | -0.0047 |
| PY03009 | -0.6576 | -0.1377 | 0.0995  | 0.0422  | 0.1405  | 0.2752  | 0.0534  | 0.0988  | -0.1051 | 0.125   | 0.1618  | -0.0833 |
| PY03221 | -0.5561 | 0.0767  | 0.4359  | -0.177  | -0.6333 | -0.2208 | 0.0548  | -0.0651 | 0.5388  | 0.0884  | 0.4127  | 0.0707  |
| PY04728 | 0.1244  | 0.2745  | 0.3518  | -0.0257 | -0.1737 | 1.3202  | -0.1801 | 0.004   | 0.1489  | 0.6541  | 0.1879  | 0.2803  |
| PY00718 | -0.5989 | -0.4447 | -0.5473 | 0.6272  | 0.0716  | 0.155   | -0.1527 | 0.4812  | -0.632  | 0.0501  | 0.2766  | -0.1386 |
| PY04962 | -0.273  | -0.1279 | -0.2563 | -0.4961 | -0.0952 | 0.1236  | 0.1905  | 0.4589  | 0.2446  | 0.3423  | 0.257   | 0.6458  |
| PY05040 | 0.185   | -0.172  | -0.4454 | 0.6521  | 0.386   | 0.1168  | -0.1842 | -0.2864 | -0.2075 | -0.5299 | -0.0523 | -0.1702 |
| PY02420 | -0.2803 | -0.2921 | -0.2882 | -0.1993 | -0.277  | -0.0381 | -0.0173 | -0.1015 | -0.1203 | -0.1652 | 0.0725  | -0.2897 |
| PY01226 | -0.1198 | -0.1609 | -0.0746 | -0.0341 | -0.135  | 0.165   | 0.2325  | -0.0067 | -0.1275 | 0.0246  | -0.0362 | -0.7587 |
| PY03407 | 0.3097  | 0.0641  | 0.1251  | 0.3264  | 0.2383  | 0.1398  | -0.0886 | -0.1443 | -0.0131 | -0.3293 | -0.3642 | -0.047  |
| PY00768 | -0.0552 | 0.0121  | -0.0297 | 0.1322  | 0.3797  | 0.3267  | 0.0819  | -0.1639 | -0.3281 | -0.0702 | -0.3069 | -0.175  |
| PY06909 | 0.1823  | 0.0681  | -0.0043 | -0.2288 | -0.3002 | -0.3901 | -0.2333 | -0.0783 | -0.0758 | -0.1899 | -0.3    | -0.0656 |
| PY05581 | 0.7828  | 0.1399  | 0.2425  | -0.4019 | -0.1269 | -0.0421 | -0.0692 | -0.293  | -0.0683 | -0.4471 | -0.3537 | 0.0546  |
| PY05511 | -0.79   | -0.0704 | 0.5847  | 0.4222  | -0.0509 | 0.01    | 0.22    | 0.2511  | 0.3967  | 0.303   | 0.2267  | 0.1264  |
| PY06610 | -0.3503 | -0.0562 | 0.1163  | 0.1165  | 0.2678  | 0.8814  | -0.2126 | 0.3249  | 0.0089  | 0.0497  | 0.6894  | 0.0215  |
| PY04665 | -0.0636 | 0.0937  | 0.0283  | 0.2942  | 0.1019  | 0.2306  | 0.059   | 0.3574  | 0.2001  | 0.5154  | 0.0195  | 0.103   |
| PY04920 | -0.171  | -0.0596 | -0.0209 | -0.1044 | -0.1494 | -0.3995 | -0.1927 | 0.254   | 0.0549  | 0.3758  | 0.6813  | 0.1094  |
| PY04648 | -0.4648 | -0.3293 | -0.3934 | 0.1271  | 0.7648  | 0.395   | 0.2264  | 0.2142  | -0.4395 | -0.0807 | 0.4128  | -0.3909 |
| PY04879 | -0.4943 | -0.1829 | -0.1951 | -0.206  | -0.4301 | -0.3876 | 0.0444  | 0.3491  | 0.2691  | 0.3361  | 0.4687  | 0.351   |
| PY06850 | 0.9167  | 0.4369  | 0.3415  | 0.3433  | -0.039  | 0.1137  | 0.6276  | 0.077   | 0.3321  | -0.1067 | -0.8264 | 0.5574  |
| PY02930 | 0.0494  | -0.1847 | -0.457  | -0.3879 | 0.3129  | 0.1086  | -0.1315 | -0.1397 | -0.276  | -0.8618 | -0.1764 | -0.2965 |
| PY04130 | -0.0562 | 0.0315  | 0.1442  | -1.0081 | -0.432  | -0.0493 | 0.0897  | -0.5883 | -0.4361 | -0.8644 | -0.4267 | -0.8824 |
| PY01313 | 0.367   | 0.2909  | -0.2763 | -0.4245 | -0.2581 | -0.4975 | -0.1223 | -0.1531 | 0.0594  | -0.3429 | 0.0142  | -0.078  |
| PY02212 | -0.3522 | -0.4497 | -0.4562 | 0.2205  | 0.7154  | 0.2813  | -0.2508 | -0.2019 | -0.4234 | 0.0301  | -0.3905 | -0.3352 |
| PY01932 | -1.0085 | -0.2692 | -0.7397 | -1.6829 | -0.8767 | -0.5776 | -0.0998 | 0.3627  | 0.2963  | -0.0855 | 1.0624  | -0.1556 |
| PY04107 | 0.3474  | -0.2141 | -0.1835 | 0.6604  | -0.4985 | 0.016   | -0.0509 | 0.0185  | -0.2887 | 0.3446  | 0.3952  | -0.0938 |
| PY03146 | 0.5405  | 0.1693  | 0.0581  | -0.2066 | 0.0956  | 0.0605  | -0.1893 | -0.358  | -0.2103 | 0.1454  | -0.3818 | -0.3089 |
| PY06894 | -0.3149 | -0.0304 | 0.1517  | -0.1575 | -0.0951 | 0.0647  | 0.1206  | 0.3417  | 0.1463  | -0.7536 | 0.2535  | -0.1688 |
| PY03970 | 0.6441  | 0.3848  | 0.2996  | 0.6608  | 1.1772  | -0.0771 | -0.1241 | 0.0853  | 0.052   | -0.034  | -0.2313 | 0.121   |
| PY02602 | 0.155   | 0.0652  | 0.0866  | -0.2925 | -0.3028 | 0.0026  | -0.1565 | 0.0054  | -0.2483 | -0.6031 | -0.0819 | -0.268  |
| PY00034 | -1.0562 | -0.415  | 0.0005  | -0.1403 | 0.0973  | -0.3456 | 0.0572  | 0.4449  | 0.2457  | 0.0332  | 0.7823  | -0.3495 |
| PY01492 | 0.5393  | 0.0009  | 0.3932  | -0.0096 | -0.7591 | -0.2575 | -0.4948 | -0.3169 | -0.1526 | -0.1542 | -0.5992 | -0.1116 |
| PY04833 | 0.1817  | -0.0012 | -0.2887 | 0.1288  | -0.0698 | 0.2462  | 0.19    | 0.3124  | 0.1579  | -0.2394 | -0.3612 | 0.1153  |
| PY05325 | 0.5387  | 0.2206  | -0.2704 | 0.776   | 0.7652  | 0.147   | -0.2437 | -0.4603 | -0.353  | -0.4543 | -0.4785 | -0.5034 |
| PY02109 | -0.9169 | -0.874  | -0.3927 | -0.7062 | -0.6205 | -0.1103 | 0.199   | 0.2397  | 0.3349  | 0.1088  | 0.1136  | 0.1852  |
| PY02949 | 0.9019  | 0.4232  | 0.2895  | 0.0835  | 0.0978  | -0.0392 | 0.1016  | -0.4772 | -0.0996 | -0.4291 | -0.1717 | -0.1985 |
| PY00650 | -0.2078 | -0.0107 | 0.0295  | -0.9236 | -0.3332 | -0.1039 | 0.1395  | -0.1088 | 0.2135  | -0.6418 | 0.0675  | -0.1135 |
| PY03608 | -0.0171 | 0.2158  | -0.3288 | 0.4504  | 0.1466  | -0.1607 | -0.3921 | 0.3717  | 0.2736  | 0.482   | 0.8421  | 0.1022  |

|         |         |         |         |         |         |         |         |         |         |         |         |         |
|---------|---------|---------|---------|---------|---------|---------|---------|---------|---------|---------|---------|---------|
| PY01136 | 0.6147  | 0.297   | 0.5395  | 0.8355  | -0.1848 | 0.2748  | 0.3013  | -0.0381 | -0.1081 | 0.5755  | -0.2604 | 0.4797  |
| PY02940 | 0.2799  | 0.2144  | 0.053   | 0.3884  | 0.5812  | 0.1489  | 0.0283  | -0.1657 | 0.0038  | 0.4621  | -0.1345 | 0.0955  |
| PY07396 | -0.4915 | -0.096  | -0.1396 | -0.722  | -0.1116 | -0.1563 | 0.0619  | 0.1913  | 0.2379  | 0.1318  | 0.3371  | 0.128   |
| PY06201 | -0.5134 | 0.0498  | -0.1237 | 0.2871  | 0.8986  | 0.9472  | 0.1396  | 0.5969  | 0.4405  | 0.6983  | 1.4463  | -0.2351 |
| PY00508 | -0.2061 | -0.2864 | -0.0081 | -0.0227 | -0.3197 | 0.1119  | 0.0888  | -0.0685 | 0.3684  | 0.0395  | -0.1895 | 0.1308  |
| PY02245 | 0.0206  | -0.102  | 0.0156  | 0.31    | 0.0424  | -0.0347 | 0.0471  | 0.2358  | 0.1833  | 0.0212  | -0.227  | 0.3254  |
| PY06922 | 0.0884  | -0.0225 | -0.0502 | -0.714  | -0.0894 | 0.1204  | 0.2769  | 0.1761  | -0.0039 | -0.132  | -0.1255 | 0.1495  |
| PY01936 | -0.2473 | -0.1967 | -0.1238 | -0.441  | 0.1695  | -0.0661 | 0.0209  | 0.2018  | -0.1291 | 0.002   | 0.5161  | -0.0708 |
| PY03453 | 0.1643  | -0.0595 | 0.2572  | -0.2211 | 0.0858  | -0.5898 | -0.3769 | -0.367  | -0.2248 | -0.0702 | -0.2278 | -0.4459 |
| PY02911 | -0.7655 | -0.1048 | 0.2394  | 0.641   | -0.1442 | -0.1859 | -0.1558 | 0.2076  | 0.0931  | 0.191   | 0.5404  | -0.4682 |
| PY00932 | 0.3531  | 0.1524  | 0.169   | -0.058  | 0.0615  | 0.2062  | 0.269   | -0.0534 | -0.0748 | -0.0848 | -0.644  | 0.0719  |
| PY05538 | 0.2544  | 0.0678  | 0.1801  | -0.2017 | -0.2635 | -0.0233 | -0.047  | -0.129  | -0.2139 | 0.2127  | -0.1833 | 0.0193  |
| PY03773 | 0.2547  | 0.0894  | -0.5006 | 0.0303  | 0.0673  | -0.0026 | -0.1941 | -0.0749 | -0.2837 | -0.2807 | 0.0772  | 0.0967  |
| PY03811 | 0.0935  | 0.2244  | -0.1632 | -0.3491 | -0.3083 | -0.304  | 0.1644  | 0.1263  | 0.0651  | -0.2111 | -0.2155 | -0.0599 |
| PY05497 | 0.0212  | 0.1411  | 0.0548  | 0.026   | -0.4358 | -0.1803 | 0.0272  | 0.0612  | 0.3518  | -0.274  | -0.3276 | -0.0042 |
| PY04489 | -0.4901 | -0.1908 | 0.1034  | 0.2099  | 0.07    | -0.0987 | -0.3136 | 0.0027  | 0.1708  | 0.0869  | 0.0533  | -0.2241 |
| PY03675 | -0.0381 | 0.017   | 0.0479  | -0.4336 | -0.1063 | -0.0206 | 0.2384  | 0.223   | 0.1046  | -0.1682 | -0.1313 | -0.1438 |
| PY05779 | 0.0872  | 0.18    | 0.4491  | -0.0874 | 0.3201  | 0.4457  | 0.3768  | 0.0756  | 0.2372  | 0.0248  | 0.3822  | 0.4979  |
| PY05522 | -0.056  | -0.3815 | 0.1717  | -0.2878 | 0.0434  | 0.2515  | 0.0275  | 0.1777  | 0.3439  | -0.054  | -0.2221 | 0.0255  |
| PY01697 | -0.6525 | -0.3781 | -0.1592 | -0.2743 | 0.1213  | 0.0403  | -0.0369 | 0.1366  | -0.1566 | 0.3145  | 0.2102  | -0.1223 |
| PY03329 | 0.763   | 0.1308  | 0.3253  | 0.2376  | -0.2899 | 0.1497  | 0.2456  | 0.0533  | 0.2793  | -0.0117 | -0.6351 | 0.3408  |
| PY00457 | 0.3826  | 0.2201  | 0.1222  | 0.5136  | 0.344   | 0.1908  | 0.0452  | 0.1584  | 0.2448  | 0.1564  | 0.3932  | 0.248   |
| PY07290 | -0.0855 | -0.3925 | -0.608  | -0.0115 | 0.1454  | -0.1103 | 0.0269  | 0.096   | 0.0044  | -0.0131 | 0.0303  | 0.449   |
| PY00633 | 0.4507  | 0.2222  | 0.9187  | -0.6022 | 0.0275  | 0.2393  | 0.5092  | -0.2039 | 0.1258  | -0.1426 | -0.3385 | 0.121   |
| PY06717 | -0.1814 | 0.0782  | -0.5207 | -0.1641 | 0.5423  | -0.1375 | -0.0574 | 0.1296  | -0.0849 | 0.1042  | 0.5024  | 0.0591  |
| PY05434 | -0.0912 | -0.1097 | -0.0974 | 0.0472  | -0.052  | 0.0769  | 0.0501  | 0.0587  | 0.0457  | 0.0289  | -0.2548 | 0.2059  |
| PY06505 | -0.4279 | -0.1403 | 0.1629  | -0.2394 | -0.1345 | 0.028   | 0.0335  | -0.0045 | -0.0387 | -0.2188 | 0.0247  | 0.1215  |
| PY03915 | -0.6761 | -0.4902 | -0.2974 | -0.0181 | -0.398  | -0.0543 | -0.1329 | 0.3053  | -0.0143 | 0.0194  | 0.2052  | -0.3535 |
| PY02956 | -1.342  | -0.8648 | -0.7077 | -0.6386 | -0.3252 | -0.1299 | -0.0769 | 0.5724  | 0.2144  | -0.1232 | 0.3564  | -0.3812 |
| PY05757 | 0.7802  | 0.5942  | 0.0111  | -0.0969 | 0.117   | -0.0714 | 0.3638  | -0.0994 | 0.3872  | 0.0849  | -0.1596 | 0.3253  |
| PY02358 | 0.1354  | -0.0241 | 0.042   | -0.0236 | 0.3399  | -0.1492 | 0.0825  | 0.0896  | 0.1713  | 0.113   | 0.4918  | 0.2092  |
| PY01196 | 0.0721  | -0.1142 | -0.1908 | 1.1377  | 0.1743  | 0.0682  | -0.2087 | 0.3249  | -0.1769 | 0.1831  | 0.1317  | 0.0828  |
| PY06638 | 0.4781  | 0.9836  | 0.9791  | 0.1138  | -0.4303 | 0.1115  | 0.5029  | -0.2027 | 0.3349  | -0.1998 | -1.1641 | 0.4195  |
| PY07237 | 0.2247  | 0.4413  | 0.1235  | -0.1245 | -0.3333 | 0.063   | 0.1187  | -0.1444 | 0.1474  | -0.1482 | -0.3289 | 0.3518  |
| PY01622 | 0.3849  | 0.1772  | 0.0365  | 0.358   | 0.1783  | 0.0917  | 0.0719  | -0.1737 | 0.0647  | -0.3132 | -0.3286 | -0.149  |
| PY00594 | -0.3051 | -0.1521 | -0.3364 | -0.4591 | -0.0172 | -0.2129 | -0.0586 | 0.1285  | 0.0715  | -0.0013 | 0.3565  | -0.0218 |
| PY03050 | -0.0621 | -0.0286 | 0.1703  | 0.0415  | 0.0214  | 0.0916  | -0.0083 | -0.0876 | 0.121   | -0.021  | -0.1099 | 0.205   |
| PY03025 | -0.5078 | 0.0149  | -0.1973 | -0.682  | -0.26   | 0.0403  | -0.1482 | 0.0958  | -0.0173 | 0.2264  | -0.3448 | 0.0636  |
| PY04242 | -0.5637 | -0.2044 | -0.0148 | -0.2589 | 0.4159  | -0.0347 | -0.0318 | -0.0862 | -0.1047 | 0.0069  | 0.2652  | -0.024  |
| PY00942 | -0.2593 | -0.4071 | -0.1504 | 0.3584  | -0.0416 | 0.1105  | 0.0345  | 0.3788  | 0.1268  | 0.7237  | -0.0772 | 0.1057  |
| PY02496 | -0.2641 | -0.1556 | -0.1991 | 0.1804  | 0.1491  | 0.1371  | -0.1931 | -0.0273 | -0.0807 | -0.0215 | -0.1672 | 0.0207  |
| PY01715 | -0.1009 | -0.1375 | -0.1878 | 0.3211  | -0.8737 | -0.3117 | -0.1034 | 0.4223  | 0.3262  | -0.0203 | -0.1096 | -0.0113 |
| PY00227 | -0.4708 | -0.0589 | 0.5567  | 0.2341  | 0.2032  | 0.201   | 0.0682  | -0.0225 | 0.1703  | 0.297   | -0.0763 | -0.0264 |
| PY06296 | 0.1013  | 0.1182  | -0.5773 | -0.2189 | 0.3615  | -0.114  | 0.3144  | 0.0327  | 0.0554  | 0.0412  | 0.1627  | -0.0646 |
| PY05765 | 0.2668  | -0.1089 | -0.6787 | 0.0893  | 0.3411  | -0.187  | -0.4205 | -0.5266 | -0.5177 | -0.3289 | -0.7034 | -0.2107 |
| PY00940 | -1.0685 | -0.267  | -0.0149 | -0.1564 | 0.2143  | 0.055   | -0.2519 | 0.1061  | -0.1562 | 0.0821  | 0.1652  | -0.1096 |
| PY06459 | 0.7701  | 0.246   | 0.0082  | 0.3109  | 0.1028  | 0.285   | 0.0331  | -0.1651 | -0.3039 | -0.1413 | -0.3979 | -0.2303 |
| PY07201 | 0.3765  | 0.1153  | 0.188   | 0.5864  | 0.4576  | 0.236   | -0.0305 | 0.0232  | 0.0798  | 0.2823  | -0.1462 | -0.0502 |
| PY06558 | 0.8448  | 0.353   | 0.1903  | 0.0174  | -0.2675 | -0.0647 | 0.2301  | -0.2785 | 0.1143  | -0.1077 | -0.2776 | 0.4687  |
| PY05595 | 0.1435  | -0.0123 | -0.1753 | 0.4311  | -0.0267 | 0.1856  | 0.003   | -0.0517 | 0.0636  | -0.7259 | -0.4341 | 0.1333  |
| PY00830 | 0.0411  | 0.0623  | -0.2087 | 0.1471  | -0.2467 | -0.0978 | -0.1108 | 0.1103  | 0.0587  | 0.2847  | 0.2446  | 0.0654  |
| PY01644 | -0.393  | 0.0725  | 0.181   | -0.52   | 0.0547  | 0.0398  | 0.1863  | -0.1455 | 0.0304  | -0.1702 | -0.1306 | -0.077  |
| PY02838 | 0.053   | -0.0009 | -0.198  | -0.1594 | 0.2655  | 0.079   | 0.0218  | -0.0306 | 0.0675  | -0.0023 | 0.0691  | -0.0271 |
| PY00525 | -0.3162 | -0.1869 | -0.4095 | -0.1938 | 0.1396  | -0.1407 | -0.1326 | -0.0711 | -0.0213 | -0.086  | 0.0543  | 0.0572  |
| PY07526 | -0.6706 | -0.2078 | -0.9135 | 0.0387  | 0.0651  | 0.0242  | 0.1125  | 0.1202  | -0.0239 | 0.3004  | 0.2234  | -0.0076 |
| PY04403 | 0.05    | -0.091  | -0.0512 | 0.1568  | 0.9132  | -0.0664 | -0.0504 | -0.0945 | -0.0044 | -0.1628 | -0.1024 | 0.0004  |
| PY03634 | -0.7076 | 0.3784  | 0.7413  | 0.1755  | 0.2183  | 0.1245  | 0.0263  | -0.1583 | 0.2329  | -0.1778 | -0.1442 | -0.2997 |
| PY06825 | -0.6128 | -0.1765 | 0.1695  | -0.2491 | -0.39   | -0.3431 | -0.0791 | 0.3306  | 0.2632  | -0.2997 | 0.107   | -0.362  |
| PY03869 | 0.1722  | 0.403   | 0.5262  | 0.0891  | -0.7801 | 0.2514  | 0.2543  | 0.0975  | 0.1304  | -0.2801 | -0.8936 | -0.3038 |
| PY02397 | -0.3155 | -0.1746 | -0.0431 | 0.3742  | 1.3642  | -0.1222 | -0.2013 | 0.3192  | -0.2209 | -0.0009 | 0.0969  | -0.1449 |
| PY03363 | 0.9661  | 0.3499  | 0.4421  | -0.359  | 0.3526  | -0.1098 | 0.2658  | -0.0775 | -0.6769 | -0.3762 | -0.3493 | -0.0465 |
| PY01807 | -0.3489 | -0.2256 | -0.2852 | 1.9941  | 1.2409  | 1.1777  | -0.1078 | 1.0698  | 0.0272  | 1.1312  | 1.4589  | -0.0004 |
| PY07225 | -0.1203 | -0.0673 | -0.0484 | -0.3138 | -0.0808 | -0.1259 | -0.3476 | -0.1539 | -1.2402 | -0.3321 | -0.0596 | -0.18   |

|         |         |         |         |         |         |         |         |         |         |         |         |         |
|---------|---------|---------|---------|---------|---------|---------|---------|---------|---------|---------|---------|---------|
| PY04049 | -0.1599 | 0.0394  | 0.0887  | 0.0967  | -0.5147 | -0.7539 | -0.6198 | -0.2531 | -0.0597 | -0.2075 | 0.5895  | -0.2636 |
| PY02342 | -1.181  | -0.4914 | -0.1351 | -0.8035 | 0.0086  | -0.4782 | -0.1753 | 0.0568  | 0.0242  | 0.1492  | 0.1865  | 0.2956  |
| PY00729 | -1.1724 | -0.5941 | -0.3967 | 0.1454  | 2.0442  | -0.2205 | -0.2524 | 0.1777  | -0.163  | -0.1071 | 0.5596  | -0.5962 |
| PY04949 | -0.2756 | -0.1362 | -0.2658 | -0.4591 | -0.092  | -0.0359 | 0.1596  | -0.0472 | 0.0895  | -0.448  | -0.3381 | -0.1677 |
| PY00123 | 0.7068  | 0.2398  | 0.1737  | -0.3193 | -0.1511 | -0.0997 | 0.1011  | -0.4194 | 0.0763  | -0.519  | -0.6623 | 0.3616  |
| PY02455 | -0.9435 | 0.2088  | -0.4305 | 0.0177  | 0.224   | 0.2558  | 0.1969  | 0.5255  | 0.3165  | 0.1604  | 0.7629  | -0.2354 |
| PY02866 | 0.6435  | 0.2509  | -0.0257 | -0.0955 | -0.5068 | -0.0978 | 0.0525  | 0.1607  | 0.189   | -0.0385 | -0.3237 | 0.1098  |
| PY05254 | -0.8545 | -0.2848 | -0.1003 | -0.1366 | -0.1444 | -0.4126 | -0.2662 | 0.3128  | 0.0245  | 0.2328  | 0.7436  | -0.1645 |
| PY02804 | 0.3706  | -0.0411 | -0.246  | 0.0022  | 1.1938  | 0.2543  | 0.0819  | 0.0246  | -0.1244 | 0.1506  | -0.2805 | 0.0846  |
| PY06735 | 0.0954  | 0.0704  | 0.0235  | 0.5479  | 0.3011  | 0.0056  | 0.0684  | 0.1863  | -0.3331 | 0.6812  | 0.2332  | -0.4474 |
| PY06657 | -0.3063 | 0.1146  | 0.0882  | -0.1142 | 0.3339  | 0.2215  | 0.2292  | 0.3751  | -0.0943 | 0.1415  | 0.4951  | -0.0434 |
| PY01013 | -0.2934 | 0.0239  | -0.4874 | 0.0831  | -0.4805 | -0.138  | 0.1148  | 0.3169  | 0.1027  | 0.1448  | 0.18    | 0.098   |
| PY02483 | -0.7408 | -0.1143 | -0.2206 | 0.2102  | 0.2599  | -0.1115 | -0.1185 | -0.1061 | -0.2441 | -0.4263 | -0.2514 | -0.2822 |
| PY06292 | -0.0075 | 0.3054  | -0.0152 | -0.0153 | -0.0297 | 0.1737  | 0.2755  | 0.1122  | -0.1627 | 0.2977  | -0.1197 | 0.0877  |
| PY04815 | -0.6243 | -0.0852 | 0.197   | 0.0599  | -0.6444 | -0.1507 | -0.1776 | 0.077   | 0.2218  | -0.566  | 0.0302  | -0.0915 |
| PY02993 | 0.1071  | -0.0694 | 0.1666  | 0.0308  | -0.3081 | 0.287   | 0.3333  | 0.3568  | 0.495   | 0.3494  | -0.3504 | 0.3952  |
| PY03685 | -0.0281 | -0.0461 | -0.0874 | 0.3632  | 0.677   | 0.1758  | -0.1761 | 0.0137  | 0.0562  | 0.3516  | -0.1371 | -0.0253 |
| PY04921 | -0.4832 | -0.2644 | 0.1129  | -0.4021 | -0.1213 | 0.2724  | 0.0659  | 0.193   | 0.0917  | -0.0812 | -0.0595 | -0.2854 |
| PY07199 | 0.2104  | 0.348   | 0.0892  | -0.4831 | 0.0788  | -0.3526 | -0.2756 | -0.4296 | -1.0735 | -0.4822 | 0.1933  | -0.0164 |
| PY07481 | -1.129  | -0.6339 | -0.2971 | -1.002  | -0.5618 | -0.4783 | -0.1351 | -0.4097 | 0.3585  | -0.3095 | 0.512   | -0.1916 |
| PY05884 | -0.8595 | -0.4872 | -0.1336 | 0.0213  | 0.1457  | -0.3893 | -0.3565 | -0.0364 | 0.0184  | -0.0835 | 0.3389  | 0.1023  |
| PY00390 | 0.1571  | -0.0329 | 0.0246  | -0.445  | -0.3717 | -0.0817 | -0.0391 | -0.1591 | 0.0551  | -0.5381 | -0.3759 | 0.0285  |
| PY02631 | 0.1025  | 0.0057  | 0.1322  | 0.2332  | 0.228   | 0.1866  | 0.1588  | -0.0071 | -0.09   | -0.0441 | -0.2796 | 0.1653  |
| PY01864 | 1.0819  | 0.6479  | 0.869   | 0.9229  | -0.0385 | 0.1525  | 0.317   | -0.16   | 0.2683  | 0.1648  | -0.9161 | 0.3305  |
| PY01616 | -0.1546 | 0.0622  | 0.2485  | -0.0718 | -0.6285 | -0.0144 | -0.26   | -0.0691 | -0.2682 | 0.1288  | -0.1073 | -0.036  |
| PY06720 | -0.5119 | -0.0668 | 0.1     | -0.0225 | 0.0448  | -0.069  | 0.0647  | 0.4295  | 0.256   | 0.2474  | 0.3705  | -0.2068 |
| PY02834 | -0.2887 | -0.2012 | -0.1639 | 0.7952  | -0.1393 | -0.4604 | -0.2536 | -0.0277 | -0.3321 | 0.0721  | 0.0036  | -0.7145 |
| PY03887 | -0.8946 | -0.3196 | 0.1291  | 0.073   | -0.1728 | -0.3452 | -0.2222 | 0.1996  | -0.0839 | 0.0187  | 0.1783  | -0.5241 |
| PY07861 | 0.01    | 0.0892  | -0.4634 | -0.3175 | 0.0437  | -0.1138 | 0.1986  | -0.212  | 0.0965  | -0.4138 | 0.029   | -0.165  |
| PY04859 | -0.4327 | -0.2805 | -0.3018 | -0.115  | -0.1269 | -0.4128 | -0.362  | 0.0013  | -0.204  | -0.3118 | 0.5758  | -0.1586 |
| PY04393 | 1.0059  | 0.6406  | 0.3302  | 0.5918  | 0.9707  | 0.327   | 0.2692  | 0.0373  | -0.002  | 0.3541  | -0.63   | 0.5106  |
| PY01711 | -0.5086 | -0.2583 | -0.3194 | -0.5682 | -0.097  | -0.3241 | -0.2958 | 0.0277  | -0.103  | 0.0794  | 0.3449  | 0.0521  |
| PY04310 | 0.2756  | -0.0825 | -0.1948 | -0.0672 | 0.3496  | 0.0617  | 0.0016  | -0.273  | -0.809  | -0.3757 | -0.208  | -0.1326 |
| PY00083 | 0.1275  | -0.3221 | -0.5184 | 0.0919  | -0.0263 | -0.1483 | -0.0909 | -0.438  | -0.1384 | -0.0641 | -0.3596 | 0.1555  |
| PY05559 | 0.851   | 0.2364  | 0.4099  | -0.1665 | -0.142  | 0.0421  | 0.5952  | -0.3731 | 0.3477  | 0.0964  | -0.4568 | 0.2318  |
| PY04339 | -0.1789 | 0.0228  | -0.5122 | 0.0994  | 0.4773  | -0.172  | -0.1308 | 0.0844  | 0.0786  | 0.2271  | 0.0319  | -0.0565 |
| PY01169 | 0.692   | 0.1568  | -0.3244 | 0.2968  | 0.4582  | 0.4773  | 0.1946  | 0.0769  | -0.3677 | 0.1964  | 0.1498  | 0.0347  |
| PY05220 | 0.6105  | 0.572   | 0.4751  | 0.3452  | 0.0112  | -0.0947 | 0.2117  | 0.062   | 0.2566  | 0.3873  | -0.0159 | -0.0227 |
| PY04690 | -0.9822 | 0.1518  | 0.5084  | -0.4516 | -0.578  | -0.5631 | -0.2326 | -0.0312 | 0.109   | -0.0177 | 0.9322  | 0.3045  |
| PY02588 | -0.8768 | -0.3542 | -0.1588 | -0.7272 | -0.5126 | -0.4235 | -0.6695 | -0.6269 | -0.3874 | 0.0735  | -0.2755 | -0.3957 |
| PY00891 | -0.0369 | -0.1322 | -0.1609 | 0.11    | -0.2651 | -0.31   | -0.4569 | -0.2516 | -0.3554 | -0.2601 | 0.0734  | -0.2477 |
| PY02375 | -0.0047 | 0.0496  | 0.0254  | -0.151  | -0.2009 | -0.1209 | 0.0129  | 0.0945  | -0.2654 | 0.0431  | 0.0738  | 0.1604  |
| PY04105 | -0.1818 | -0.1195 | 0.0278  | -0.5531 | -0.48   | 0.2036  | 0.4655  | 0.3507  | 0.4443  | 0.0582  | -0.1298 | 0.3313  |
| PY07622 | 0.3176  | -0.0083 | -0.3055 | 0.0908  | -0.4778 | -0.4519 | -0.5643 | -0.1965 | -0.3641 | 0.0039  | -0.4582 | -0.2317 |
| PY00348 | -0.2984 | 0.08    | 0.0501  | -0.3002 | 0.0803  | 0.1012  | 0.1898  | 0.1163  | -0.0228 | 0.0346  | 0.2418  | 0.0323  |
| PY00587 | -0.5318 | -0.0699 | 0.4077  | 0.0497  | -0.4124 | -0.1259 | -0.4909 | 0.0933  | -0.1327 | 0.4933  | -0.0142 | -0.0743 |
| PY03391 | -0.1347 | -0.0644 | 0.2864  | 0.8111  | 0.2386  | 0.0957  | -0.0625 | 0.0554  | 0.0356  | -0.3875 | 0.4896  | 0.0577  |
| PY04877 | -0.1025 | 0.1889  | 0.3374  | -0.0792 | 0.0529  | -0.038  | -0.1968 | -0.4783 | -0.5111 | -0.3732 | -0.4747 | -0.7993 |
| PY05979 | 0.5393  | 0.2903  | 0.5044  | -0.7535 | -0.4115 | -0.0505 | 0.4567  | -0.2424 | 0.2454  | -0.0799 | -0.3379 | 0.6585  |
| PY01045 | 0.1789  | -0.0357 | -0.1163 | -0.8372 | -0.2048 | -0.2843 | -0.0246 | -0.1862 | -0.2541 | -0.2072 | -0.2239 | 0.1706  |
| PY07345 | 0.0853  | 0.2326  | -0.0853 | 0.1881  | 0.0202  | 0.1438  | -0.0176 | -0.2811 | -0.1089 | 0.0186  | -0.2977 | 0.1098  |
| PY01143 | 0.5102  | -0.1204 | 0.3343  | 0.7438  | 0.5252  | 0.1163  | -0.0711 | -0.2588 | -0.2696 | 0.1289  | -0.1236 | 0.0297  |
| PY05110 | 0.0439  | 0.3365  | -0.2859 | 0.0221  | 0.4845  | 0.063   | -0.0066 | 0.066   | 0.1187  | 0.7038  | 0.3485  | 0.1617  |
| PY01244 | 0.5599  | 0.2396  | 0.6748  | 0.6634  | 0.2894  | -0.0516 | 0.1388  | -0.2299 | 0.0604  | -0.0247 | -0.5309 | 0.282   |
| PY05987 | -1.4369 | -0.4154 | 0.1288  | -0.0914 | 0.3749  | 0.0337  | -0.4086 | 0.2379  | -0.0257 | 0.2026  | 0.2292  | -0.1171 |
| PY07536 | 0.1596  | 0.054   | -0.0772 | 0.7545  | 0.0448  | -0.0644 | -0.1587 | 0.3005  | 0.1437  | 0.1673  | -0.026  | -0.2347 |
| PY06598 | 0.1831  | -0.0727 | 0.1202  | 0.231   | 0.3467  | -0.2875 | -0.3072 | -0.3475 | -0.6188 | -0.3075 | -0.5847 | -0.4216 |
| PY01363 | -0.1177 | 0.1122  | -0.4188 | -0.1615 | -0.3254 | -0.1784 | -0.2    | 0.0722  | -0.1104 | 0.2491  | -0.1446 | 0.2698  |
| PY06022 | -0.1507 | -0.382  | -0.7336 | 0.0794  | 0.2694  | -0.3317 | -0.3305 | 0.0342  | -0.1636 | 0.222   | -0.1556 | 0.0874  |
| PY01430 | -0.3903 | -0.1445 | -0.2032 | -0.1695 | -0.0132 | 0.0051  | -0.2035 | 0.0787  | -0.0215 | 0.3984  | 0.348   | -0.1461 |
| PY05152 | -0.6829 | 0.0867  | 0.1405  | 0.2957  | -0.2197 | -0.4762 | -0.2189 | -0.1364 | -0.0886 | -0.0295 | 0.4155  | -0.5024 |
| PY07326 | -0.0342 | 0.4847  | 0.3177  | -0.2792 | -0.4217 | 0.0925  | 0.2398  | -0.3894 | 0.0224  | -0.5907 | -0.2025 | -0.2002 |
| PY03694 | -0.1338 | -0.2187 | -0.2871 | 0.2628  | 0.1541  | 0.3843  | 0.268   | 0.2619  | 0.1545  | 0.1801  | 0.2295  | 0.1138  |

|         |         |         |         |         |         |         |         |         |         |         |         |         |
|---------|---------|---------|---------|---------|---------|---------|---------|---------|---------|---------|---------|---------|
| PY04476 | -0.7802 | -0.2576 | -0.1781 | 0.1588  | 0.3242  | 0.2114  | 0.1659  | 0.4901  | 0.1053  | 0.649   | 0.4239  | -0.3107 |
| PY02134 | 0.2039  | 0.093   | 0.3456  | 0.5549  | -0.2546 | -0.2377 | 0.1146  | 0.0867  | 0.208   | -0.0272 | -0.3173 | 0.0517  |
| PY05136 | -0.2115 | -0.5084 | -0.3075 | -0.437  | -0.1507 | 0.0595  | 0.226   | -0.1376 | 0.2383  | -0.28   | 0.0117  | 0.3333  |
| PY02084 | 0.6865  | 0.3358  | 0.365   | -0.0513 | 0.1195  | 0.2847  | 0.0279  | -0.245  | 0.0297  | -0.2518 | -0.6131 | -0.2145 |
| PY05459 | 0.0641  | -0.0958 | 0.2345  | 0.5363  | 0.6491  | 1.2301  | 0.1054  | 0.3013  | 0.1735  | 0.5354  | 0.3461  | 0.0859  |
| PY06604 | -0.4979 | -0.6236 | -0.5628 | -0.3146 | 0.0661  | -0.0641 | 0.1136  | 0.1742  | 0.1905  | 0.4278  | 0.4057  | 0.2242  |
| PY00906 | -0.072  | -0.5522 | -0.2061 | 0.3353  | -0.2483 | -0.0617 | 0.1035  | 0.3378  | 0.241   | 0.3384  | -0.0422 | -0.19   |
| PY05384 | -0.4811 | 0.0137  | 0.2353  | -0.0508 | 0.0219  | -0.1766 | -0.0184 | 0.1732  | 0.3642  | 0.2615  | 0.6133  | 0.143   |
| PY05377 | -0.1708 | 0.2296  | 0.0522  | -0.3917 | -0.2467 | 0.2988  | 0.4575  | -0.1429 | 0.1844  | -0.3134 | -0.2311 | 0.3185  |
| PY02252 | -0.0921 | 0.2126  | 0.1661  | -0.2826 | -0.1487 | -0.0741 | -0.1145 | -0.2632 | -0.0797 | -0.3731 | -0.0222 | -0.1348 |
| PY04540 | 0.7413  | 0.5475  | 0.3799  | 0.4497  | -0.2364 | 0.1435  | 0.3538  | 0.1011  | 0.3726  | -0.3551 | -0.4446 | 0.324   |
| PY05130 | 0.0773  | 0.2426  | 0.2165  | -0.5969 | -0.6026 | -0.444  | 0       | -0.1891 | 0.2601  | -0.7543 | -0.4147 | 0.3784  |
| PY06195 | -0.3442 | -0.4336 | 0.0451  | -0.4914 | -0.1301 | -0.0034 | 0.1729  | 0.0935  | 0.4261  | -0.0216 | -0.0489 | 0.3786  |
| PY05742 | -0.3257 | -0.1644 | 0.3261  | 0.46    | -0.341  | -0.2582 | -0.0562 | 0.4979  | 0.2175  | 0.3394  | -0.0225 | 0.1132  |
| PY00707 | 0.2556  | -0.3581 | -0.2494 | 0.0327  | 0.1745  | -0.0981 | -0.1585 | -0.3151 | 0.0117  | -0.2522 | -0.2248 | 0.051   |
| PY00691 | 0.2893  | 0.0644  | 0.1737  | 0.506   | -0.1183 | 0.057   | 0.0846  | 0.1606  | 0.2012  | 0.4325  | -0.2095 | 0.3534  |
| PY02733 | 0.6302  | 0.3121  | 0.0879  | 0.0301  | -0.2642 | 0.1915  | 0.4293  | 0.0068  | 0.1942  | 0.003   | -0.4529 | 0.0875  |
| PY00919 | -1.2108 | 0.1521  | 0.69    | -0.1756 | 0.2378  | -0.2604 | -0.4587 | -0.186  | -0.0249 | -0.0463 | 0.4447  | -0.5345 |
| PY05784 | -0.276  | -0.2324 | -0.0413 | -0.1368 | -0.0052 | -0.0102 | 0.1139  | 0.245   | -0.4195 | -0.2884 | 0.2748  | -0.8589 |
| PY04427 | 0.2764  | 0.4015  | 0.1164  | 0.4059  | -0.1091 | 0.1571  | -0.0465 | 0.0999  | 0.2296  | -0.7209 | -0.021  | 0.0522  |
| PY06246 | 0.2852  | 0.0902  | -0.4836 | 0.4078  | 0.3252  | -0.0106 | -0.2667 | -0.0406 | -0.0048 | 0.403   | -0.0585 | 0.1272  |
| PY03134 | -0.5279 | -0.1673 | -0.2302 | 0.0165  | -0.1911 | -0.0653 | 0.0489  | 0.2497  | 0.1398  | 0.4044  | 0.2026  | 0.3898  |
| PY02511 | -0.1868 | 0.1556  | 0.0048  | 0.3781  | -0.8779 | -0.2601 | -0.1748 | -0.0363 | 0.0513  | -0.2415 | 0.2341  | -0.3095 |
| PY04795 | 0.8559  | 0.347   | 0.6659  | 0.3232  | -0.1462 | -0.0848 | -0.0576 | 0.1831  | 0.2891  | 0.2648  | -0.3947 | 0.3509  |
| PY00934 | 0.4694  | 0.2068  | 0.1506  | 0.0612  | -0.0641 | -0.1375 | -0.331  | -0.3544 | -0.3829 | 0.0917  | -0.4202 | -0.4575 |
| PY03668 | -0.15   | -0.221  | -0.8118 | 0.6697  | 0.4889  | -0.3811 | -0.4659 | -0.1516 | -0.2523 | -0.1623 | -0.197  | -0.0126 |
| PY00795 | 0.6672  | 0.2122  | 0.2224  | 0.9506  | -0.0264 | 0.1075  | -0.1254 | 0.1242  | -0.2707 | 0.8475  | -0.3863 | -0.1251 |
| PY06432 | -1.3296 | -0.7676 | -0.4607 | -0.3902 | -0.7527 | -0.2604 | 0.0467  | 0.6927  | 0.3638  | 0.4222  | 0.6374  | -0.3052 |
| PY03539 | 0.2905  | 0.1777  | -0.0296 | 0.1025  | 0.4158  | -0.0712 | -0.2192 | 0.096   | 0.0542  | -0.0382 | 0.4614  | 0.0439  |
| PY04560 | 0.0757  | -0.0647 | 0.0894  | 0.0132  | 0.2229  | -0.128  | 0.0441  | -0.037  | 0.002   | -0.0183 | -0.023  | 0.1792  |
| PY03792 | -1.0152 | -0.5332 | -0.8587 | -0.4585 | -0.2836 | 0.1798  | -0.2307 | 0.5013  | 0.1784  | 0.4477  | 0.1193  | -0.0298 |
| PY05053 | -0.0928 | -0.2835 | 0.0642  | 0.0644  | 0.1439  | -0.2235 | -0.1367 | 0.1715  | 0.1358  | -0.1149 | 0.3186  | 0.3003  |
| PY01436 | -0.0285 | -0.3988 | -0.5537 | -0.8386 | -0.1314 | -0.3034 | -0.2299 | -0.0188 | -0.1618 | 0.3563  | 0.0972  | -0.084  |
| PY02898 | -0.1916 | -0.1351 | -0.1769 | 0.2176  | 0.048   | -0.0958 | -0.2062 | 0.085   | -0.2392 | 0.3343  | 0.058   | 0.2053  |
| PY00397 | -0.276  | -0.153  | -0.4359 | -0.3688 | -0.2326 | -0.1814 | -0.1442 | 0.0289  | 0.0231  | -0.3211 | 0.155   | -0.3396 |
| PY04693 | -0.048  | -0.1314 | -0.0401 | -0.1992 | 0.8174  | 0.1668  | 0.0253  | 0.1114  | -0.0249 | 0       | 0.3748  | 0.032   |
| PY03304 | 0.3859  | 0.1571  | -0.0468 | -1.1708 | -0.0053 | -0.2462 | -0.0938 | -0.4287 | -0.1575 | -0.3099 | -0.0859 | 0.0702  |
| PY03996 | -0.742  | 0.4108  | 0.0937  | -0.1407 | -0.7159 | -0.3343 | -0.1787 | 0.1841  | 0.0726  | 0.0319  | 0.4979  | -0.2975 |
| PY02679 | 0.0411  | 0.1637  | 0.1018  | -0.0571 | -0.0482 | 0.0355  | -0.0534 | -0.127  | 0.1284  | -0.0475 | -0.0355 | 0.0087  |
| PY00648 | -0.3264 | -0.014  | -0.0292 | 1.0489  | 0.4522  | 0.2297  | 0.0769  | -0.1011 | -0.1255 | -0.0945 | -0.0055 | 0.3644  |
| PY07432 | -0.557  | 0.0509  | 0.1724  | -0.0524 | -0.0201 | 0.018   | 0.1338  | -0.0381 | 0.1458  | 0.0794  | 0.1767  | 0.4339  |
| PY07838 | 0.4623  | 0.2717  | -0.0789 | 0.0728  | -0.1782 | -0.0988 | -0.1632 | 0.0634  | -0.2318 | 0.4783  | -0.0172 | -0.3472 |
| PY03446 | 1.6523  | 0.5207  | 0.3656  | -0.4207 | -0.9494 | -0.0807 | 0.4339  | -0.0303 | 0.4509  | -0.127  | -0.8022 | 0.5548  |
| PY02046 | -0.8336 | -0.5236 | -1.4089 | 0.0258  | -0.1553 | 0.1663  | 0.4461  | 0.4663  | 0.378   | 0.5984  | 0.1845  | 0.2815  |
| PY03920 | 0.2474  | -0.069  | -0.2296 | 0.024   | 0.3548  | 0.5709  | 0.0909  | -0.208  | -0.3043 | -0.1505 | -0.6015 | -0.0568 |
| PY06644 | 0.1921  | 0.2188  | 0.1501  | -0.1762 | -0.293  | 0.1239  | 0.1901  | -0.237  | 0.062   | -0.2044 | -0.0516 | -0.0443 |
| PY03294 | 0.3731  | 0.2942  | 0.4144  | -0.0732 | -0.2382 | -0.1495 | 0.0395  | -0.1812 | 0.1905  | -0.1285 | -0.3711 | 0.1817  |
| PY00436 | -0.5518 | -0.1672 | -0.2142 | -0.3033 | 0.0452  | 0.143   | 0.046   | 0.2535  | 0.0431  | -0.5442 | 0.0269  | -0.3201 |
| PY03901 | 0.1931  | -0.0992 | -0.3298 | -0.1566 | 0.1234  | -0.1809 | -0.0099 | 0.001   | 0.004   | -0.2184 | 0.2297  | 0.1893  |
| PY07049 | -0.9453 | -0.2738 | -0.3302 | -0.2116 | -0.5552 | -0.1273 | -0.2272 | 0.4026  | -0.0231 | 0.1124  | 0.4282  | -0.2749 |
| PY05919 | -0.4062 | -0.0631 | -0.1182 | 1.0292  | 1.0849  | 0.954   | -0.1379 | 0.5625  | 0.0011  | 1.0976  | 0.5181  | -0.1233 |
| PY03663 | 1.0546  | 0.6599  | 0.8316  | 0.6547  | 0.1736  | 0.2032  | 0.7706  | -0.1638 | 0.1651  | 0.0395  | -0.5037 | 0.6028  |
| PY04793 | 0.2368  | 0.5065  | 0.7747  | 0.4333  | -0.1045 | 0.3043  | 0.3011  | -0.1146 | 0.1564  | -0.2056 | -0.5723 | -0.3607 |
| PY04588 | -0.0529 | -0.2246 | 0.3366  | 0.5024  | -0.02   | -0.0578 | 0.1036  | 0.3125  | 0.1805  | -0.0753 | 0.3118  | 0.0949  |
| PY06400 | -1.3213 | -0.9362 | -0.9122 | -1.2808 | -1.0324 | -0.6572 | -0.4843 | 0.0714  | 0.0845  | 0.2416  | 0.7338  | 0.4743  |
| PY00333 | -0.0492 | -0.1238 | -0.3246 | -0.1619 | -0.2243 | -0.0612 | -0.1255 | 0.0123  | 0.015   | 0.2915  | 0.1206  | 0.0833  |
| PY00730 | -0.7667 | -1.0541 | -0.4662 | 0.3261  | 1.0066  | 0.3366  | -0.5044 | -0.1435 | -1.2269 | -0.2108 | 1.3347  | -1.0324 |
| PY02597 | 0.0478  | 0.0926  | -0.1882 | 0.5936  | -0.5184 | -0.4064 | -0.2333 | 0.3809  | 0.2433  | 0.4866  | 0.242   | 0.1095  |
| PY03350 | -0.5105 | -0.2616 | 0.1188  | -0.3421 | -0.3283 | -0.2888 | -0.0259 | 0.1082  | 0.5139  | 0.0436  | 0.0292  | 0.3536  |
| PY03224 | 0.1109  | 0.1409  | -0.3905 | 0.1251  | 0.1718  | 0.0022  | -0.1119 | 0.1386  | 0.0769  | 0.5226  | 0.6698  | 0.4065  |
| PY06526 | -0.5773 | 0.1199  | 0.0607  | -0.4309 | -0.1241 | -0.1482 | -0.2536 | -0.0668 | -0.1873 | -0.2089 | -0.016  | -0.4649 |
| PY06540 | 0.1033  | 0.0332  | 0.5071  | -0.2733 | -0.2365 | -0.2589 | 0.1971  | 0.0838  | 0.1177  | -0.1718 | -0.1722 | 0.0677  |
| PY07166 | -0.2081 | -0.0893 | 0.2664  | 0.2723  | -0.3245 | -0.2034 | -0.1964 | 0.3758  | 0.086   | 0.325   | -0.1255 | -0.0352 |

|         |         |         |         |         |         |         |         |         |         |         |         |         |
|---------|---------|---------|---------|---------|---------|---------|---------|---------|---------|---------|---------|---------|
| PY00962 | -0.6863 | -0.2162 | -0.3594 | -0.3999 | 0.2945  | 0.3648  | -0.0654 | -0.0444 | -0.321  | -0.2247 | -0.4126 | -0.3119 |
| PY00203 | 0.3556  | 0.3054  | 0.1923  | 0.1546  | -0.0803 | 0.2445  | 0.3689  | -0.106  | 0.0891  | 0.0231  | -0.2934 | 0.1219  |
| PY03771 | 0.0549  | 0.1695  | -0.1019 | 0.6338  | 0.0232  | -0.0462 | -0.0174 | 0.2454  | 0.1286  | 0.3758  | 0.211   | 0.2292  |
| PY03478 | 0.2248  | 0.0557  | -0.1571 | 0.2793  | 0.0423  | -0.1161 | 0.0465  | -0.0929 | 0.1123  | 0.0872  | -0.0618 | 0.0938  |
| PY04118 | -0.4401 | 0.066   | 0.4417  | 0.1458  | 0.0478  | 0.0972  | -0.0502 | 0.2214  | 0.029   | 0.032   | 0.4843  | -0.031  |
| PY07127 | 0.2645  | -0.1284 | -0.1515 | 0.4809  | 0.1123  | -0.0517 | -0.1468 | 0.3303  | 0.24    | -0.1365 | 0.2574  | -0.4145 |
| PY06900 | 1.0744  | 0.5218  | 0.5647  | 0.1134  | -0.5105 | 0.042   | 0.217   | -0.1882 | 0.1579  | -0.218  | -0.517  | 0.2421  |
| PY04746 | 0.9566  | 0.5824  | 0.5606  | -0.1396 | -0.1488 | 0.099   | 0.3596  | -0.3094 | 0.3236  | -0.3816 | -0.6191 | 0.6109  |
| PY06101 | -0.1793 | -0.2683 | -0.2467 | -0.0989 | -0.3616 | -0.1177 | 0.0286  | -0.1656 | 0.1695  | 0.0954  | -0.1484 | 0.3024  |
| PY05576 | -0.4798 | -0.2439 | -0.0395 | -0.0007 | -0.0864 | 0.0538  | -0.1274 | -0.107  | -0.0693 | -0.3078 | -0.1113 | 0.0854  |
| PY01064 | -1.0359 | -0.119  | 0.0427  | -0.6222 | -0.1604 | 0.1055  | -0.1628 | -0.0455 | 0.0776  | -0.2423 | 0.0139  | -0.7567 |
| PY05241 | 0.0899  | -0.032  | -0.0216 | -0.2033 | 0.2101  | -0.3588 | -0.0752 | 0.2424  | -0.0624 | -0.2497 | 0.3984  | -0.0433 |
| PY06287 | 0.7131  | 0.2704  | 0.0756  | 0.0395  | 0.7623  | 0.2861  | 0.1058  | -0.0861 | -0.156  | -0.0938 | 0.3629  | -0.113  |
| PY00434 | 1.4191  | 0.8533  | 1.1285  | 0.3378  | -0.5194 | -0.1901 | 0.362   | -0.3313 | 0.49    | -0.0057 | -0.9437 | 0.389   |
| PY01273 | 0.4398  | 0.2653  | 0.3908  | 0.4309  | 0.1682  | 0.1186  | -0.0079 | -0.0408 | -0.4784 | 0.3424  | -0.5202 | -0.1642 |
| PY01913 | -0.123  | 0.1559  | -0.4616 | 0.8826  | 0.4615  | -0.2082 | -0.4353 | 0.2862  | -0.1315 | 1.2719  | 0.137   | -0.3579 |
| PY04040 | -0.0232 | -0.0397 | 0.0591  | 0.1313  | -0.5607 | 0.1164  | 0.0708  | 0.1708  | 0.1552  | 0.0471  | -0.0782 | 0.2284  |
| PY06071 | -0.621  | -0.0088 | -0.2539 | -0.9363 | -0.8435 | -0.4305 | 0.1557  | 0.9189  | 0.6341  | -0.1086 | 1.2101  | -0.4199 |
| PY01521 | -0.147  | 0.0758  | 0.0248  | -0.2839 | -0.0468 | 0.1326  | 0.1934  | 0.0512  | 0.1143  | -0.1849 | 0.2338  | 0.0622  |
| PY05619 | 0.2753  | 0.1681  | -0.0975 | 0.3854  | 0.1366  | 0.0652  | -0.2344 | -0.2822 | -0.3313 | 0.2775  | -0.0381 | -0.2211 |
| PY06932 | 0.3769  | -0.1763 | 0.0504  | -0.0109 | 0.0304  | -0.0232 | -0.0043 | -0.0936 | -0.608  | -0.0967 | -0.4584 | -0.1542 |
| PY05550 | 0.0287  | -0.4911 | -0.3224 | 0.4623  | -0.0216 | -0.7278 | -0.6952 | -0.6164 | -0.2007 | 0.3787  | -0.7885 | -0.2836 |
| PY00855 | 0.6921  | 0.2082  | -0.1571 | 0.7528  | 0.0197  | 0.0225  | 0.0277  | -0.2797 | -0.0843 | -0.0207 | -0.6231 | 0.3046  |
| PY01764 | -0.3021 | -0.1507 | 0.2183  | 0.1458  | 0.2952  | 0.0317  | -0.0628 | -0.333  | -0.3148 | -0.5689 | -0.2898 | 0.0884  |
| PY04702 | -0.8961 | -0.0883 | -0.2759 | 0.0726  | 0.1353  | 0.6035  | 0.3744  | 0.6627  | 0.2864  | 0.221   | 0.5084  | -0.1888 |
| PY01832 | -0.5926 | -0.189  | 0.1322  | 0.2611  | 0.3059  | -0.1184 | -0.0266 | 0.0891  | -0.1218 | -0.0931 | 0.4521  | -0.0751 |
| PY01209 | -0.3447 | -0.1319 | -0.5288 | 0.4891  | 0.3558  | 0.259   | 0.0169  | -0.0285 | -0.5258 | 0.0556  | -0.4926 | -0.2006 |
| PY06308 | -0.5184 | -0.2022 | -0.3044 | -0.0977 | 0.3032  | 0.3435  | 0.0149  | -0.0139 | -0.0999 | -0.0758 | -0.2352 | -0.1003 |
| PY05189 | 0.417   | 0.1509  | 0.2708  | 0.5106  | 0.6027  | 0.2875  | 0.2189  | 0.0266  | -0.0835 | 0.5572  | 0.3858  | 0.184   |
| PY04637 | -0.0367 | -0.3833 | -0.2163 | 0.8633  | 0.2822  | 0.2143  | -0.0718 | 0.3643  | -0.0534 | 0.3139  | -0.2503 | -0.3074 |
| PY00679 | 1.0181  | 0.689   | 0.9386  | -0.2731 | -0.3709 | -0.0018 | 0.5295  | -0.2366 | 0.3908  | -0.2825 | -0.4074 | 0.6666  |
| PY02593 | 0.9493  | 0.6693  | 0.7473  | 0.2672  | -0.08   | 0.2383  | 0.5015  | -0.1611 | 0.0664  | -0.2194 | -0.7255 | 0.0869  |
| PY05369 | 0.1229  | 0.1828  | 0.5242  | 0.2412  | -0.4384 | -0.2806 | 0.3064  | 0.0506  | 0.2427  | -0.7352 | -0.4859 | 0.0767  |
| PY06001 | -0.2871 | 0.1483  | 0.0726  | 0.3055  | 0.0447  | -0.276  | -0.2518 | -0.2369 | -0.3736 | 0.2577  | -0.0881 | -0.199  |
| PY01957 | -1.0048 | -0.1225 | 0.1555  | -0.9218 | -0.5607 | -0.0764 | 0.1403  | -0.0446 | 0.3609  | -0.479  | 0.0931  | -0.4215 |
| PY01729 | 0.8986  | 0.5734  | 0.3473  | 0.3094  | -0.7429 | -0.2839 | 0.0177  | -0.5067 | 0.0712  | -0.3779 | -0.1765 | 0.1183  |
| PY01369 | 0.0459  | -0.0805 | -0.0868 | 0.1168  | -0.3365 | 0.2828  | -0.038  | -0.4017 | -0.1799 | -0.3266 | -0.1407 | -0.2216 |
| PY01303 | -0.1771 | -0.4909 | -0.424  | -0.1706 | -0.0783 | -0.0952 | 0.1062  | 0.2843  | -0.7436 | -0.1456 | -0.213  | -0.6445 |
| PY07219 | 0.297   | -0.0785 | 0.2993  | 0.3268  | 0.4187  | 0.1522  | 0.3236  | 0.1105  | -0.0147 | -0.1679 | 0.394   | 0.2145  |
| PY00020 | 0.5045  | -0.0043 | 0.2921  | -0.1377 | 0.9879  | 0.0468  | 0.2408  | -0.027  | 0.0083  | 0.4241  | 0.0476  | -0.0641 |
| PY02486 | -0.2344 | 0.0321  | 0.0532  | 0.9448  | 0.0693  | -0.1794 | -0.1512 | 0.1818  | 0.0447  | 0.103   | 0.5296  | 0.1591  |
| PY04938 | 0.2278  | 0.2304  | -0.0237 | 0.0729  | 0.0385  | -0.2322 | -0.0949 | -0.0318 | 0.1012  | 0.1252  | 0.0563  | 0.1885  |
| PY04071 | 0.1562  | -0.3243 | -0.2534 | -0.1078 | 0.4957  | 0.0411  | -0.2007 | 0.0983  | -0.2809 | 0.0812  | -0.0235 | -0.0305 |
| PY04400 | -0.1176 | -0.4908 | 0.2089  | 0.017   | 0.4095  | 0.1861  | 0.1691  | #####   | -0.2069 | 0.0767  | 0.0352  | 0.1488  |
| PY06697 | -0.0527 | 0.0222  | 0.1426  | -0.2635 | -0.2379 | -0.3177 | -0.4681 | -0.3749 | -0.2458 | -0.438  | -0.209  | -0.3699 |
| PY05213 | -0.8441 | -0.5737 | -0.52   | -0.6419 | -0.3849 | -0.6046 | 0.1772  | -0.046  | 0.7997  | -0.0911 | 0.5544  | 0.131   |
| PY01925 | 0.4734  | -0.1116 | -0.2816 | 0.3624  | 0.5631  | -0.2906 | -0.2579 | -0.4713 | -0.2937 | -0.7521 | -0.5291 | -0.1946 |
| PY04181 | 0.015   | -0.1629 | -0.1327 | 0.2942  | 0.5394  | -0.0231 | -0.0424 | 0.2082  | -0.1711 | 0.64    | 0.6326  | 0.0768  |
| PY01467 | 0.5583  | 0.3966  | 0.5939  | -0.7042 | -0.2529 | -0.1327 | -0.2174 | -0.3754 | -0.2073 | -0.4379 | -0.6125 | -0.2041 |
| PY06855 | 0.5935  | 0.2917  | 0.8674  | 0.2804  | -0.3343 | 0.3711  | 0.4408  | 0.0544  | 0.3913  | -0.1209 | -0.8371 | -0.0588 |
| PY03296 | 0.0516  | -0.4398 | 0.3     | 1.2676  | 0.1017  | 0.3144  | -0.0233 | 0.196   | -0.035  | 0.0332  | -0.1044 | -0.3994 |
| PY01398 | 0.0291  | 0.3346  | 0.0251  | 0.25    | 0.1801  | 0.3077  | 0.0925  | 0.195   | 0.0665  | 0.3276  | 0.2563  | -0.0874 |
| PY01061 | 0.7232  | 0.3365  | 0.1755  | 0.774   | 0.1943  | 0.6442  | 0.4459  | 0.2941  | 0.3065  | 0.3287  | -0.1641 | 0.1099  |
| PY05537 | 1.1291  | 0.4109  | 0.9372  | 0.8853  | 0.2249  | 0.6054  | 0.2911  | -0.1505 | 0.1061  | 0.2656  | -0.5521 | 0.2108  |
| PY02747 | -0.4886 | -0.003  | 0.281   | 0.238   | 0.5656  | 0.0509  | -0.2586 | 0.1256  | -0.1212 | 0.0199  | 0.5457  | -0.248  |
| PY01680 | 0.6489  | -0.0921 | 0.1896  | -0.7851 | -0.0578 | -0.1001 | 0.1752  | -0.5877 | -0.3289 | -0.4427 | -0.2739 | 0.2724  |
| PY00414 | 0.1765  | 0.1381  | 0.4901  | 0.2993  | 0.1626  | 0.0061  | -0.1436 | -0.0312 | -0.1521 | 0.0941  | 0.0642  | -0.4913 |
| PY00054 | -0.2305 | -0.5318 | -0.2761 | -0.0307 | 0.4032  | 0.5247  | 0.1672  | 0.3093  | -0.0408 | 0.2795  | 0.0571  | 0.2679  |
| PY01668 | 0.1274  | 0.0259  | -0.4486 | 0.3165  | 0.0565  | -0.4148 | -0.3661 | 0.0961  | -0.4701 | -0.2185 | 0.2809  | -0.1167 |
| PY05571 | -0.1222 | 0.1807  | 0.3064  | -0.1813 | 0.0208  | 0.4384  | 0.3748  | 0.2883  | 0.2966  | -0.226  | -0.2893 | -0.3208 |
| PY02643 | -0.082  | 0.1066  | 0.3283  | -0.1221 | -0.1913 | -0.0682 | 0.1425  | -0.2931 | -0.1123 | 0.2158  | -0.0764 | -0.0809 |
| PY03586 | 1.3981  | 0.5757  | 0.8269  | 0.1027  | -0.6787 | 0.2227  | 0.5364  | -0.1998 | 0.3701  | -0.3521 | -1.2399 | 0.0996  |
| PY01584 | -1.4181 | -0.1829 | 0.1334  | 0.0157  | 0.1362  | -0.0724 | 0.1292  | 0.2491  | 0.1119  | 0.5608  | 0.8426  | -0.14   |



|         |         |         |         |         |         |         |         |         |         |         |         |         |
|---------|---------|---------|---------|---------|---------|---------|---------|---------|---------|---------|---------|---------|
| PY05005 | -0.2114 | -0.3561 | -0.1659 | -0.1163 | 0.1814  | -0.2252 | -0.5757 | -0.0912 | -0.4035 | 0.0779  | 0.1899  | -0.253  |
| PY02380 | 0.1329  | 0.0698  | -0.3605 | 0.1385  | 0.1957  | 0.1125  | -0.2403 | -0.1457 | -0.3365 | 0.0246  | -0.4737 | -0.0038 |
| PY02044 | -0.6473 | -0.2964 | -0.091  | -0.4625 | -0.1244 | 0.0019  | 0.0478  | -0.0003 | -0.2626 | 0.0768  | 0.2158  | -0.0095 |
| PY04994 | 0.4979  | 0.337   | -0.1946 | -0.0711 | -0.1258 | -0.1075 | -0.1701 | 0.1447  | -0.3346 | 0.344   | -0.1164 | 0.1129  |
| PY02490 | -0.0743 | -0.0969 | -0.0502 | -0.1655 | 0.3873  | 0.116   | -0.0025 | 0.1102  | 0.0597  | -0.0304 | 0.3777  | 0.2541  |
| PY01075 | 0.4388  | 0.0799  | -0.1478 | -0.136  | 0.0587  | -0.2959 | -0.3245 | -0.5398 | -0.4164 | -0.5107 | -0.6429 | -0.0639 |
| PY00994 | 1.1862  | 0.6907  | 0.5895  | 0.0952  | -0.7431 | 0.084   | 0.0559  | -0.7169 | 0.1537  | -0.1601 | -0.6043 | 0.159   |
| PY02516 | -0.6539 | -0.1696 | -0.3496 | -0.1809 | 0.2954  | 0.2705  | -0.0863 | -0.001  | -0.1434 | -0.3758 | -0.4586 | -0.2419 |
| PY02387 | 0.0838  | 0.2086  | 0.117   | 0.4406  | -0.3271 | 0.034   | -0.1431 | 0.0162  | 0.0837  | -1.6129 | -0.2151 | 0.098   |
| PY03549 | -0.4948 | -0.2124 | -0.4082 | 0.045   | 0.5944  | 0.0589  | -0.3749 | -0.1049 | -0.1413 | -0.1682 | 0.0138  | -0.1314 |
| PY07331 | 0.0764  | 0.1213  | -0.1721 | 0.2647  | 0.4251  | 0.1482  | -0.1182 | -0.1419 | 0.1607  | -0.5434 | -0.0043 | -0.1511 |
| PY05688 | -0.3015 | 0.0948  | -0.1934 | 0.2316  | 0.132   | 0.0601  | -0.0621 | 0.286   | 0.0248  | 0.3503  | -0.1923 | -0.0884 |
| PY06580 | -0.5019 | -0.6245 | -0.1231 | 0.1742  | 0.0374  | -0.1382 | 0.1337  | 0.2728  | 0.2514  | -0.0766 | 0.1879  | -0.1223 |
| PY06705 | -0.288  | -0.4929 | -0.8853 | -0.0079 | -0.2159 | -0.479  | -0.3553 | -0.1698 | -0.2318 | -0.293  | -0.1901 | 0.0162  |
| PY06389 | -0.9    | -0.5831 | -0.5297 | -0.3663 | -0.8696 | -0.4466 | 0.036   | 0.3697  | 0.1095  | 0.3458  | 0.431   | 0.3865  |
| PY06115 | 0.005   | 0.0384  | -0.1841 | 0.1225  | 0.0469  | 0.2933  | 0.3532  | 0.1617  | 0.2451  | 0.1664  | -0.1322 | 0.2084  |
| PY04831 | -0.1593 | -0.1149 | -0.0218 | -0.1497 | 0.0644  | 0.1419  | 0.1054  | 0.107   | 0.0032  | 0.2507  | -0.0212 | 0.1062  |
| PY01654 | 0.4702  | 0.0102  | 0.0773  | 1.0831  | 0.1164  | 0.0474  | 0.0546  | -0.2699 | 0.047   | 0.0213  | -0.4661 | 0.2595  |
| PY03740 | -0.1081 | 0.0034  | 0.0544  | 0.2228  | 0.1542  | 0.3017  | -0.0809 | -0.0281 | 0.2901  | 0.2364  | -0.062  | 0.0237  |
| PY03144 | -0.5721 | -0.1727 | -0.0858 | 0.2709  | 0.3404  | 0.3553  | 0.133   | 0.2676  | -0.1904 | 0.1501  | 0.4754  | -0.3829 |
| PY06661 | 0.7576  | 0.1944  | -0.4723 | -0.0614 | -0.0282 | -0.0605 | -0.0616 | -0.0636 | 0.1527  | -0.064  | -0.1645 | 0.1692  |
| PY06344 | -0.2781 | -0.6757 | -0.0521 | 0.2535  | 0.0138  | 0.1621  | -0.0787 | 0.0746  | -0.2706 | 0.1415  | -0.1746 | -0.0139 |
| PY00476 | -0.1328 | 0.1844  | 0.3169  | -0.1648 | -0.0977 | -0.3858 | -0.2412 | -0.1958 | -0.0623 | 0.5514  | 0.1274  | -0.2394 |
| PY02106 | -0.3068 | -0.2649 | -0.0861 | -0.0625 | 0.4331  | 0.3022  | 0.3122  | -0.2643 | 0.0645  | -0.0045 | 0.1611  | 0.3168  |
| PY06663 | 0.9715  | 0.4737  | 0.8867  | -0.4082 | -0.5405 | -0.0717 | 0.3925  | -0.154  | 0.653   | -0.0469 | -0.3997 | 0.6103  |
| PY06458 | 0.3488  | -0.1965 | -0.1466 | 0.3241  | -0.2081 | -0.0777 | -0.0677 | -0.0196 | -0.1713 | 0       | -0.1354 | 0.4631  |
| PY01354 | -0.838  | -0.4886 | -0.6071 | -0.5633 | -0.2874 | -0.4046 | 0.0999  | 0.2237  | 0.4617  | 0.285   | 0.8071  | -0.042  |
| PY07583 | -0.695  | -0.3456 | -0.442  | -0.1434 | -0.3207 | 0.0693  | -0.0565 | 0.483   | 0.3187  | 0.0327  | 0.0423  | -0.574  |
| PY00009 | -0.0565 | -0.2924 | 0.1008  | -0.2827 | -0.2212 | -0.2891 | -0.2908 | 0.0264  | -0.3938 | 0.0759  | 0.1815  | -0.1078 |
| PY06830 | 0.4022  | -0.0423 | -0.0635 | 1.3573  | 1.1309  | 0.6214  | 0.0357  | 0.5773  | -0.2289 | 0.3449  | 0.3108  | -0.331  |
| PY04907 | 0.5817  | 0.2752  | -0.4398 | 0.1294  | 0.0051  | 0.2794  | 0.1471  | -0.108  | -0.3213 | -0.0842 | -0.7901 | -0.0417 |
| PY02891 | 0.7023  | 0.2952  | 0.0918  | 0.214   | -0.0443 | -0.0046 | -0.0999 | 0.0265  | -0.0316 | 0.1467  | -0.2538 | 0.0157  |
| PY02641 | -0.2697 | 0.0832  | -0.0205 | 0.0834  | -0.4261 | -0.2832 | 0.0531  | 0.4157  | 0.4559  | 0.1193  | 0.0868  | 0.266   |
| PY05069 | -0.4235 | -0.2685 | -0.7104 | -1.1794 | -0.989  | -0.2964 | -0.1946 | -0.3686 | -0.4455 | -1.4084 | -0.1801 | -0.3872 |
| PY04365 | -0.23   | -0.6659 | -0.3061 | -0.4876 | -0.2341 | -0.1415 | -0.1139 | 0.0032  | 0.3679  | 0.3114  | 0.468   | 0.1743  |
| PY02499 | 0.6388  | 0.1767  | -0.6046 | 0.1732  | 0.3141  | 0.096   | -0.1752 | -0.3953 | -0.5378 | -0.2638 | -0.2537 | -0.0442 |
| PY05611 | 0.2476  | -0.2886 | -0.3989 | -0.2181 | 0.4439  | -0.0928 | -0.2629 | -0.0886 | -0.2749 | 0.3201  | 0.0716  | -0.0931 |
| PY05849 | -0.1336 | 0.3314  | -0.0087 | -0.4237 | -0.5367 | -0.4032 | -0.0006 | -0.0605 | 0.0785  | -0.5505 | -0.0093 | -0.066  |
| PY01604 | 0.0334  | 0.1184  | -0.1158 | 0.6643  | 0.2619  | 0.0962  | -0.0743 | 0.0256  | -0.0188 | 0.2888  | -0.1582 | -0.0408 |
| PY03744 | -0.5118 | -0.3919 | -0.36   | -0.2586 | -0.4544 | 0.1844  | 0.2917  | 0.4806  | 0.2697  | 0.0229  | 0.3999  | -0.1038 |
| PY05556 | 0.3872  | 0.2234  | -0.3444 | -0.726  | -0.3225 | -0.2524 | -0.0351 | -0.0231 | 0.1568  | -0.1331 | -0.1232 | -0.4166 |
| PY01738 | 0.6194  | 0.4345  | 0.6721  | 0.211   | -0.1531 | 0.1308  | 0.1913  | -0.1129 | 0.1978  | 0.0612  | -0.5882 | 0.1229  |
| PY02634 | -0.1511 | 0.3274  | 0.4478  | 0.2023  | -0.1373 | 0.0845  | 0.752   | 0.1467  | -0.0462 | 0.4965  | 0.1477  | 1.0886  |
| PY06394 | 0.1958  | 0.1278  | 0.1922  | -1.2809 | -0.2721 | -0.0614 | 0.1295  | -0.3551 | -0.112  | -0.4689 | -0.397  | 0.0018  |
| PY02074 | -0.7667 | -0.2877 | 0.1782  | -0.8931 | -0.2204 | -0.1955 | -0.5177 | -0.2544 | -0.1716 | 0.0191  | 0.2408  | 0.0884  |
| PY01351 | 0.1966  | 0.0205  | 0.1375  | -0.4968 | 0.0476  | 0.0307  | 0.1081  | -0.4713 | 0.0678  | -0.7013 | 0.5377  | 0.0323  |
| PY07320 | 0.3575  | -0.0004 | 0.1218  | -0.4613 | -0.3402 | -0.1424 | 0.1138  | -0.1965 | -0.0049 | -0.5006 | -0.4255 | -0.0705 |
| PY01173 | 0.3586  | 0.0478  | -0.0415 | 0.477   | 0.449   | 0.1233  | -0.1629 | 0.0097  | -0.231  | 0.3572  | 0.2355  | 0.1548  |
| PY06792 | -0.5155 | -0.2762 | -0.1164 | 0.4011  | 0.0185  | -0.1391 | 0.0094  | 0.4116  | 0.0126  | 0.3212  | 0.3687  | 0.1784  |
| PY06787 | 0.803   | 0.3357  | 0.5349  | 0.6721  | 0.2439  | -0.141  | -0.1425 | -0.5665 | -0.2546 | -0.5812 | -0.8072 | -0.1134 |
| PY01557 | -0.3124 | -0.1685 | -0.1045 | -0.6758 | 0.2082  | -0.0447 | 0.0013  | -0.2755 | -0.0158 | -0.3146 | -0.0535 | 0.2116  |
| PY03841 | -0.1098 | -0.1339 | 0.1191  | -0.9069 | 0.2361  | -0.0415 | -0.2321 | -0.2133 | -0.2965 | -0.0586 | 0.0196  | 0.1472  |
| PY02000 | 0.1155  | 0.1158  | -0.1603 | 0.9478  | 0.3586  | 0.3172  | -0.3144 | -0.0224 | -0.1992 | -0.0409 | 0.077   | -0.0079 |
| PY00617 | 0.1033  | 0.0157  | -0.1377 | 0.0534  | 0.6309  | 0.185   | -0.1375 | -0.1647 | -0.0727 | -0.3951 | -0.482  | -0.4025 |
| PY00014 | -0.1645 | -0.2034 | 0.067   | -0.4478 | -0.0354 | 0.171   | 0.5635  | 0.3034  | 0.1902  | 0.2039  | 0.1746  | 0.1621  |
| PY06417 | -0.2556 | -0.0859 | 0.0127  | 0.2057  | -0.1831 | -0.1251 | -0.0329 | 0.1192  | 0.0899  | 0.5298  | 0.5301  | -0.2106 |
| PY06963 | -0.0915 | -0.4942 | -0.8364 | -0.6387 | -0.2963 | -0.0293 | -0.2171 | 0.4167  | -0.0111 | 0.468   | 0.2239  | 0.0522  |
| PY01628 | -1.2118 | -0.2693 | -0.3732 | -0.3837 | -0.1177 | 0.1379  | 0.0152  | 0.3885  | -0.0192 | -0.4022 | 0.289   | -0.4266 |
| PY01403 | -0.5211 | 0.3694  | 0.5291  | 0.2014  | 0.2123  | 0.0123  | -0.0557 | 0.2427  | 0.2392  | -0.1276 | 0.7031  | -0.6857 |
| PY02605 | -0.0626 | 0.0334  | -0.5979 | 0.1123  | 0.1064  | -0.1949 | -0.0688 | 0.0148  | -0.0645 | -0.3087 | 0.0199  | -0.2393 |
| PY02621 | 0.0053  | -0.1352 | 0.0916  | 0.3098  | 0.3066  | -0.0488 | -0.074  | -0.0856 | -0.0973 | 0.3399  | -0.1091 | 0.1541  |
| PY03554 | -0.593  | 0.1754  | -0.3183 | -0.834  | -0.1013 | -0.0531 | 0.1149  | 0.3481  | -0.018  | 0.2063  | 0.9025  | -0.3827 |
| PY04671 | 0.2051  | 0.0535  | 0.3461  | 0.5637  | -0.0333 | -0.336  | -0.1792 | -0.2465 | -0.0474 | -0.1189 | 0.491   | 0.0187  |

|         |         |         |         |         |         |         |         |         |         |         |         |         |
|---------|---------|---------|---------|---------|---------|---------|---------|---------|---------|---------|---------|---------|
| PY06539 | 0.0005  | 0.1381  | -0.136  | 0.1682  | 0.2629  | -0.4169 | -0.1825 | 0.063   | -0.2931 | 0.212   | 0.424   | -0.0704 |
| PY02019 | 0.0063  | 0.064   | -0.1379 | -0.2685 | -0.13   | -0.1874 | -0.3159 | -0.3708 | -0.0355 | -0.3727 | -0.1979 | -0.1548 |
| PY05733 | 0.5182  | -0.0112 | -0.2012 | 0.4003  | -0.1698 | 0.1957  | 0.3284  | 0.1728  | 0.3821  | 0.5054  | -0.2038 | 0.565   |
| PY01725 | 0.805   | 0.468   | 0.2377  | -0.2412 | -0.151  | 0.1096  | 0.1759  | -0.059  | 0.0975  | -0.2065 | -0.6855 | 0.2408  |
| PY02554 | -0.7754 | -0.5751 | -0.2563 | -0.421  | 0.4364  | 0.1289  | -0.1895 | -0.1875 | -0.2425 | -0.2278 | 0.0012  | -0.0654 |
| PY06182 | -1.5453 | -1.8338 | -0.7967 | -0.3926 | 0.2858  | -0.0797 | 0.1103  | 0.2475  | 0.1617  | 0.054   | 0.4233  | -0.4607 |
| PY06790 | 0.3327  | -0.0616 | 0.0168  | 0.4698  | 0.1942  | 0.4616  | 0.4042  | 0.0023  | 0.1234  | -0.0534 | -0.2572 | -0.1406 |
| PY02681 | 0.0887  | -0.1508 | -0.7263 | 0.8432  | 0.669   | -0.3326 | -0.4021 | -0.2196 | -0.5762 | -0.2849 | -0.0577 | 0.0153  |
| PY01948 | 0.4615  | 0.3244  | 0.3022  | 0.1319  | -0.4229 | -0.1032 | -0.0567 | -0.2403 | -0.0521 | -0.4198 | -0.3437 | -0.1063 |
| PY01884 | -0.567  | -0.4094 | -0.4195 | -0.727  | -0.2969 | -0.15   | -0.0696 | 0.0667  | -0.0007 | -0.3165 | -0.1061 | -0.1124 |
| PY00109 | 0.9707  | 0.4917  | -0.0108 | 0.846   | 0.099   | 0.0022  | -0.1783 | 0.0803  | -0.2267 | -0.0897 | -0.4466 | -0.086  |
| PY04510 | 0.8146  | 0.3547  | 0.5852  | 0.1942  | -0.2655 | -0.1205 | 0.2945  | -0.3112 | 0.2656  | -0.4782 | -0.7871 | 0.3239  |
| PY05309 | -1.5623 | -0.9537 | -0.3462 | -0.8664 | -0.3511 | -0.4125 | -0.3084 | 0.4133  | 0.4087  | -0.2148 | 0.7544  | -0.5077 |
| PY02238 | -0.726  | -0.1515 | -0.0286 | 0.1133  | 0.3085  | 0.4963  | 0.1234  | 0.1897  | -0.0597 | -0.1602 | 0.287   | -0.3948 |
| PY05911 | 0.5062  | 0.2758  | -0.035  | 0.0241  | -0.311  | -0.3089 | -0.0166 | 0.045   | -0.0797 | 0.1694  | -0.0783 | 0.1664  |
| PY07065 | -0.4321 | -0.1549 | 0.0647  | -0.7088 | -0.469  | -0.1763 | -0.2371 | -0.2352 | -0.0108 | -0.1277 | 0.162   | 0.2933  |
| PY07078 | -0.091  | -0.0103 | -0.0898 | -0.5958 | -0.0993 | -0.1171 | -0.0204 | -0.1317 | -0.0726 | -0.5506 | 0.037   | -0.0945 |
| PY01008 | 0.739   | 0.2553  | 0.0857  | 0.6277  | 0.1992  | 0.2435  | 0.1636  | 0.0482  | 0.0842  | -0.0728 | -0.2068 | 0.1785  |
| PY03490 | 0.4359  | 0.1342  | 0.0424  | -0.5845 | -0.316  | -0.2261 | 0.2295  | -0.3868 | -0.1284 | -0.3272 | -0.2299 | -0.0263 |
| PY06150 | 0.1013  | 0.1629  | 0.1318  | 0.4861  | 0.1596  | -0.0651 | 0.2743  | 0.3023  | 0.2248  | 0.0507  | 0.438   | 0.0433  |
| PY00407 | -0.6629 | -0.2062 | 0.1603  | 0.2877  | 0.3036  | 0.0649  | -0.3043 | 0.0102  | -0.1912 | 0.3167  | 0.5017  | -0.016  |
| PY01001 | -0.2254 | 0.2066  | -0.0319 | 0.7964  | 0.518   | 0.2841  | -0.1032 | 0.4052  | 0.2784  | 0.458   | 0.5025  | 0.19    |
| PY05631 | 1.0564  | 0.6289  | 0.3039  | -0.0101 | -0.7381 | -0.1219 | 0.0213  | -0.6278 | -0.1812 | -0.2802 | -0.6848 | -0.0134 |
| PY01295 | 0.1177  | -0.0251 | -0.1286 | 1.8192  | 0.2638  | 0.0952  | 0.0334  | 0.336   | 0.1278  | 0.6006  | 0.4814  | -0.097  |
| PY03510 | -0.6116 | -0.1756 | -0.145  | -0.5859 | -0.2142 | -0.305  | -0.1309 | -0.2841 | 0.0992  | -0.4106 | 0.0341  | 0.0086  |
| PY07404 | 0.2504  | 0.5145  | 0.8754  | -0.1947 | -0.534  | 0.2667  | 0.0409  | -0.2469 | -0.087  | -0.558  | -0.4322 | -0.1057 |
| PY02225 | 0.2619  | 0.0504  | -0.6457 | 0.4411  | 0.2     | -0.208  | -0.2773 | 0.0717  | -0.1188 | -0.3852 | -0.4604 | 0.1273  |
| PY03194 | -0.0265 | 0.0203  | -0.134  | -0.5781 | 0.0211  | -0.1105 | -0.0474 | -0.0308 | 0.0019  | -0.1019 | -0.0398 | -0.1899 |
| PY01022 | -0.4804 | -0.1853 | -0.4227 | 0.3265  | 0.4353  | 0.0924  | -0.1602 | -0.143  | -0.1096 | 0.3673  | 0.1759  | -0.2418 |
| PY01611 | -0.2574 | 0.4124  | 0.3514  | 0.1468  | -0.1919 | 0.4548  | 0.4778  | -0.1198 | -0.1844 | 0.0634  | -0.1551 | -0.2359 |
| PY04203 | -0.3147 | -1.0703 | -0.0778 | 1.3124  | 0.5114  | -0.1972 | -0.1578 | 0.4643  | -0.0745 | 0.7645  | 0.5697  | 0.0702  |
| PY06449 | -0.5451 | -0.2627 | 0.0356  | 0.1817  | 0.6549  | 0.2601  | -0.2321 | 0.1177  | -0.1537 | 0.393   | -0.0766 | -0.2251 |
| PY05854 | 0.3048  | -0.3077 | 0.2756  | 0.4007  | 0.0385  | -0.0726 | 0.1405  | -0.003  | 0.1867  | 0.0621  | 0.1458  | 0.0929  |
| PY06262 | -0.0948 | -0.1245 | -0.21   | 0.0228  | -0.0741 | 0.3074  | -0.0823 | -0.2064 | -0.2811 | -0.4212 | 0.2763  | -0.1119 |
| PY06968 | 0.3403  | 0.0702  | 0.0881  | -0.2721 | 0.4512  | -0.3402 | 0.1548  | -0.0773 | 0.4378  | -0.0925 | 0.0563  | 0.0988  |
| PY01357 | -0.3904 | -0.5115 | 0.3306  | 0.5332  | 0.1399  | -0.0327 | -0.1211 | 0.4735  | 0.0582  | 0.8145  | 0.0628  | -0.298  |
| PY03187 | 0.3683  | 0.0975  | 0.2796  | -0.4676 | -0.0491 | 0.0074  | 0.2219  | 0.0431  | 0.2601  | 0.6693  | -0.0236 | 0.2657  |
| PY01577 | -0.0141 | -0.4268 | 0.3587  | -0.2348 | -0.3189 | -0.1424 | -0.3354 | -0.2477 | -0.2121 | 0.2695  | -0.2492 | -0.0378 |
| PY07358 | -0.1178 | -0.0801 | 0       | 0.7608  | 0.1531  | 0.139   | -0.0989 | 0.3095  | -0.0119 | 1.0638  | 0.2562  | 0.159   |
| PY00197 | -0.357  | -0.0337 | -0.1426 | -0.3499 | -0.2808 | -0.1318 | 0.0625  | -0.3247 | -0.1549 | 0.1096  | 0.0052  | -0.1639 |
| PY00095 | -0.2414 | -0.4167 | -0.3245 | -0.151  | 0.0584  | 0.0557  | 0.1497  | 0.0851  | 0.2216  | -0.1452 | 0.2476  | 0.2664  |
| PY06146 | -0.1972 | -0.3086 | -0.3098 | -0.0201 | -0.4673 | -0.1274 | -0.219  | 0.0278  | 0.0769  | -0.2823 | -0.3634 | 0.1423  |
| PY00912 | -0.4028 | -0.1726 | -0.7268 | 0.705   | 0.1303  | -0.153  | -0.1407 | 0.1169  | -0.127  | 0.2089  | 0.341   | -0.1381 |
| PY05873 | 0.1086  | 0.0105  | -0.0667 | 0.2512  | -0.3287 | -0.1409 | 0.0198  | -0.0962 | 0.085   | -0.2938 | -0.4318 | -0.26   |
| PY02290 | 0.5238  | 0.0404  | 0.8238  | -0.0729 | 0.0862  | -0.0628 | -0.011  | -0.5646 | -0.1559 | -0.0511 | -0.4425 | -0.0576 |
| PY02716 | -0.4371 | -0.1055 | -0.1727 | 0.8631  | 0.4768  | 0.0331  | -0.1839 | 0.0451  | -0.231  | -0.0933 | 1.4818  | -0.3998 |
| PY07424 | 0.6066  | 0.1274  | 0.1226  | -0.1749 | -0.1974 | -0.2573 | 0.0161  | -0.0307 | 0.1083  | -0.0398 | -0.4811 | 0.1824  |
| PY02960 | -0.0797 | -0.2519 | -0.0287 | -0.1288 | -0.3349 | 0.1109  | 0.0202  | 0.4708  | 0.6502  | 0.6265  | -0.2126 | 0.5946  |
| PY05898 | 0.2976  | 0.0743  | -0.2999 | 0.235   | -0.141  | -0.0303 | 0.0079  | 0.1687  | -0.1681 | 0.3325  | 0.0717  | -0.1677 |
| PY05231 | 0.3339  | -0.1268 | 0.0311  | -0.851  | -0.2908 | -0.2235 | 0.0757  | -0.4975 | -0.3084 | -0.6554 | -0.4966 | 0.2857  |
| PY07245 | 0.2664  | 0.2127  | 0.1237  | -0.4262 | -0.313  | -0.017  | 0.3331  | 0.0146  | 0.0604  | -0.1801 | -0.6029 | -0.0792 |
| PY05725 | 0.1593  | -0.3918 | -0.121  | 0.292   | 0.1644  | 0.3356  | 0.0159  | -0.0821 | -0.0517 | 0.129   | -0.4388 | 0.3385  |
| PY03273 | 0.1406  | -0.0005 | -0.0318 | 0.4275  | 0.3663  | -0.1233 | -0.0151 | -0.366  | -0.0088 | 0.5119  | 0.5382  | -0.3561 |
| PY02904 | 0.7969  | 0.293   | 0.2625  | 0.433   | 0.3561  | -0.0126 | 0.4051  | 0.0166  | -0.076  | -0.0704 | -0.0591 | 0.1818  |
| PY04649 | 0.2836  | -0.9305 | -1.3436 | 0.6392  | 1.2409  | 0.4715  | -0.1755 | -0.1077 | -0.4061 | 0.2849  | -0.0915 | 0.2321  |
| PY07676 | 0.2244  | 0.2379  | -0.4134 | 0.1456  | 0.3065  | 0.1761  | 0.2839  | -0.0273 | 0.3786  | -0.0576 | 0.3362  | 0.3031  |
| PY01741 | -0.3682 | -0.2616 | 0.041   | -0.2686 | -0.5241 | 0.051   | 0.0912  | 0.2878  | 0.1407  | -0.0933 | -0.1513 | -0.0562 |
| PY02218 | 0.8415  | 0.2507  | 0.274   | -0.7957 | 0.0939  | 0.154   | 0.2159  | -0.4475 | 0.068   | -0.2161 | -0.2028 | 0.4216  |
| PY07381 | 0.4088  | -0.0542 | 0.5582  | 0.3291  | 0.365   | 0.4883  | 0.3275  | 0.1047  | 0.1181  | 0.3252  | 0.3164  | 0.028   |
| PY04959 | -0.1231 | 0.1496  | 0.3218  | -1.1425 | -0.5528 | -0.164  | 0.1695  | -0.418  | 0.1555  | -0.444  | -0.4198 | 0.0559  |
| PY01199 | 0.9217  | 0.306   | -0.0959 | 0.3717  | 0.0584  | 0.0035  | -0.0394 | -0.2286 | -0.1377 | -0.5093 | -0.4861 | 0.0559  |
| PY07599 | -1.0681 | -0.4447 | -0.6324 | -0.9771 | -0.8415 | -0.6566 | -0.237  | 0.012   | -0.0118 | -0.0487 | 0.489   | 0.3181  |
| PY01099 | 0.267   | -0.035  | 0.097   | 0.2145  | -1.2109 | -0.295  | -0.154  | 0.0565  | 0.1046  | -0.3148 | -0.3361 | -0.0648 |

|         |         |         |         |         |         |         |         |         |         |         |         |         |
|---------|---------|---------|---------|---------|---------|---------|---------|---------|---------|---------|---------|---------|
| PY03840 | 0.4491  | 0.1351  | 0.8109  | 0.0182  | -0.5922 | -0.0158 | 0.2826  | -0.3756 | 0.1443  | -0.4317 | -0.5798 | 0.4158  |
| PY05585 | -0.1136 | 0.2181  | 0.0077  | 0.0999  | 0.0977  | -0.0879 | -0.1244 | -0.1277 | -0.1972 | -0.2304 | -0.2925 | -0.3292 |
| PY04500 | 0.7309  | 0.1524  | -0.1022 | 0.9004  | 0.328   | 0.0364  | -0.1109 | -0.2312 | -0.2922 | 0.1904  | -0.5354 | 0.1064  |
| PY02323 | 0.4048  | 0.1409  | 0.1145  | 0.097   | -0.149  | -0.1338 | -0.0254 | -0.1952 | 0.1503  | -0.093  | -0.2073 | -0.0362 |
| PY05274 | -0.0309 | -0.1531 | 0.0012  | -0.1695 | 0.0299  | 0.2793  | 0.0389  | 0.0837  | -0.1086 | 0.3864  | 0.2847  | -0.1018 |
| PY04865 | -1.4289 | 0.1924  | 0.4901  | -0.7012 | -0.1589 | -0.047  | 0.1829  | 0.0191  | 0.0922  | -0.334  | 0.067   | 0.0667  |
| PY07154 | -0.3159 | 0.0307  | -0.1148 | -0.0925 | -0.2939 | 0.0073  | -0.0394 | -0.066  | -0.2789 | -0.4271 | 0.0071  | -0.2668 |
| PY06377 | 0.533   | 0.4179  | 0.2029  | 0.537   | 0.4981  | 0.0556  | 0.0944  | -0.3302 | -0.1246 | 0.1466  | 0.1514  | 0.0387  |
| PY00252 | -0.0273 | 0.0358  | 0.2319  | 0.2855  | 0.3409  | 0.4974  | -0.1414 | 0.3941  | 0.0427  | 0.4767  | 0.6081  | 0.0738  |
| PY04651 | -0.1668 | -1.8627 | -1.957  | 0.8374  | 0.9254  | 0.071   | -0.5964 | -0.1113 | -0.134  | 0.513   | -0.0868 | 0.5508  |
| PY00839 | 0.3194  | 0.0017  | 0.1906  | -0.0085 | 0.2025  | 0.1745  | 0.1256  | -0.1955 | -0.2544 | -0.2206 | -0.1424 | 0.1716  |
| PY00250 | -0.4575 | -0.3653 | -0.2493 | -0.0115 | -0.1051 | -0.0434 | -0.1395 | 0.0595  | 0.587   | -0.1592 | -0.017  | 0.4026  |
| PY07559 | -0.1681 | -0.1243 | -0.0899 | -0.3351 | -1.0265 | -0.0905 | 0.0967  | 0.0421  | 0.2848  | -0.2927 | -0.5897 | 0.2991  |
| PY05540 | -1.2014 | -0.518  | -0.4775 | 0.0799  | -0.3077 | -0.1178 | -0.0821 | 0.4625  | 0.2056  | 0.475   | 0.8054  | -0.2138 |
| PY05965 | -1.2339 | 0.0833  | 0.108   | -0.6037 | -0.2299 | -0.2497 | -0.0842 | 0.0184  | 0.0701  | -0.8024 | 0.4663  | -0.3636 |
| PY00448 | -1.0992 | -0.1295 | 0.1265  | -0.5508 | -0.9516 | -0.1981 | -0.106  | -0.3669 | 0.1631  | -0.7108 | -0.2944 | -0.7043 |
| PY01945 | -0.4045 | -0.2059 | -0.1584 | 0.6557  | -0.4691 | -0.0153 | 0.2569  | 0.3075  | 0.4551  | 0.4708  | 0.3207  | -0.0638 |
| PY00053 | 0.7967  | 0.2608  | 0.1045  | 0.267   | 0.4407  | 0.0805  | -0.0513 | 0.2284  | -0.2954 | -0.0432 | -0.0261 | -0.1621 |
| PY05105 | -0.4639 | -0.2224 | 0.2256  | -0.1377 | -0.0645 | -0.0493 | -0.2668 | -0.2908 | -0.2153 | -0.2317 | -0.4529 | -0.1683 |
| PY02146 | 0.914   | 0.6221  | 0.882   | 0.1494  | -0.2106 | -0.1828 | 0.3469  | 0.0053  | 0.4543  | 0.0653  | -0.4461 | 0.3509  |
| PY06685 | -0.0646 | 0.1903  | 0.5683  | 0.5415  | -0.857  | -0.0571 | 0.0013  | -0.1676 | 0.2141  | 0.5793  | -0.4477 | -0.3135 |
| PY03159 | 0.3934  | 0.1802  | 0.4266  | -0.4234 | -0.2554 | -0.1804 | 0.0252  | -0.215  | 0.1892  | -0.3208 | -0.0301 | 0.3175  |
| PY03011 | -0.4402 | -0.034  | -0.2494 | -0.1663 | -0.3096 | -0.5114 | -0.0547 | 0.2785  | 0.1798  | 0.1817  | 0.1885  | -0.2752 |
| PY03087 | 0.4584  | 0.4421  | 0.7286  | 0.6294  | -0.1504 | -0.1374 | 0.0967  | -0.6541 | -0.0431 | -0.6237 | -0.8159 | -0.0991 |
| PY05643 | 0.2182  | 0.0395  | 0.2987  | 0.1143  | 0.5555  | -0.415  | -0.0403 | -0.1998 | 0.2838  | -0.1302 | 0.1543  | 0.3545  |
| PY02892 | -0.1804 | -0.1306 | 0.23    | 0.0723  | -0.3848 | -0.0478 | -0.0551 | 0.1859  | 0.0276  | 0.1148  | -0.2907 | 0.1643  |
| PY02321 | -0.2587 | 0.03    | -0.1033 | 0.1441  | 0.2589  | -0.4304 | -0.3841 | -0.1917 | -0.3227 | 0.3107  | 0.3776  | 0.1357  |
| PY01402 | 0.0763  | 0.2129  | 0.2721  | -0.7269 | -0.7742 | -0.1685 | 0.2842  | -0.327  | 0.339   | -0.3995 | -0.8166 | 0.2052  |
| PY05028 | 0.12    | 0.3405  | 0.4084  | -0.2371 | -0.4271 | -0.6702 | -0.4652 | -0.4321 | -0.0883 | -0.3239 | 0.1288  | -0.1259 |
| PY07442 | 0.2628  | 0.1267  | 0.0856  | 0.6638  | 0.297   | -0.1619 | -0.2979 | -0.3337 | -0.2315 | -0.0633 | -0.0943 | -0.0181 |
| PY04179 | -0.0261 | 0.0408  | -0.0753 | -0.3539 | 0.6959  | 0.8601  | -0.1695 | 0.281   | -0.2249 | 0.4637  | 0.6157  | -0.1454 |
| PY06360 | -0.4443 | -0.1658 | -0.1113 | -0.3796 | -0.7919 | -0.1083 | -0.1652 | 0.1626  | 0.132   | -0.1399 | 0.6655  | 0.1356  |
| PY02876 | -1.0688 | -0.2843 | -0.039  | -0.0162 | -0.1062 | 0.0855  | -0.0623 | 0.4195  | 0.0122  | 0.0245  | 0.5727  | -0.503  |
| PY06740 | -0.613  | -0.319  | -0.6403 | -0.0404 | -0.0287 | -0.1971 | 0.1089  | -0.3672 | 0.2591  | -0.3359 | -0.1637 | 0.0271  |
| PY05306 | 0.4484  | 0.1191  | 0.2921  | 0.4413  | 0.2011  | 0.0298  | -0.0239 | -0.0236 | 0.015   | 0.5578  | -0.1294 | 0.1221  |
| PY06241 | 0.1482  | 0.2366  | 0.1774  | -0.4987 | -0.3463 | 0.0175  | 0.1113  | -0.2896 | -0.2972 | -0.4955 | -0.2385 | 0.105   |
| PY04352 | 0.0912  | -0.0434 | -0.1064 | 0.0965  | 0.1842  | -0.0384 | -0.0156 | -0.046  | -0.1449 | 0.2847  | 0.5971  | 0.0914  |
| PY00748 | -0.2135 | -0.1543 | -0.2197 | 0.4248  | 1.0518  | 0.6774  | -0.1019 | -0.0041 | -0.1453 | 0.0174  | 1.0607  | 0.1352  |
| PY00655 | -0.4864 | -0.145  | -0.1946 | -0.1376 | -0.6186 | 0.2903  | -0.0744 | 0.3107  | 0.3582  | -0.1853 | -0.6382 | -0.1933 |
| PY03738 | 0.0708  | 0.1383  | 0.0987  | 0.5599  | 0.2416  | 0.1172  | 0.0543  | -0.0725 | -0.4216 | 0.3892  | -0.1652 | -0.0226 |
| PY00230 | 0.0557  | -0.0725 | -0.3012 | -0.275  | 0.0704  | -0.4138 | -0.0945 | -0.1496 | 0.0449  | -0.2233 | -0.1815 | -0.0315 |
| PY06442 | 0.2138  | 0.0415  | 0.1456  | 0.0295  | -0.0442 | -0.2755 | -0.087  | -0.0053 | 0.1438  | 0.1353  | 0.0319  | -0.0748 |
| PY04485 | 0.3589  | 0.1594  | -0.3535 | -0.7825 | 0.3208  | -0.1011 | -0.3849 | -0.4728 | -0.3492 | -0.4672 | -0.1456 | -0.2355 |
| PY04666 | -0.3313 | -0.1116 | 0.0996  | 0.1156  | 0.0268  | 0.3537  | 0.1402  | 0.1601  | -0.2356 | -0.7154 | -0.0745 | -0.2786 |
| PY00101 | -0.5955 | -0.3028 | -0.3565 | -0.4551 | -1.0112 | 0.0349  | -0.1548 | 0.2015  | 0.2344  | 0.0571  | -0.0416 | 0.1128  |
| PY03065 | 0.6914  | 0.2595  | 0.6053  | 0.0198  | 0.3185  | 0.1562  | 0.4276  | -0.035  | 0.3044  | -0.1311 | 0.118   | 0.5054  |
| PY00762 | -0.1624 | 0.0196  | 0.122   | 0.3261  | -0.0099 | -0.238  | 0.0511  | 0.4435  | 0.287   | 0.564   | 0.1812  | -0.0591 |
| PY02726 | -0.2556 | -0.2578 | -0.764  | -0.0665 | 0.3124  | -0.0582 | 0.0106  | 0.3581  | -0.1589 | 0.5066  | 0.0757  | 0.1648  |
| PY01043 | -0.3688 | -0.0877 | -0.2264 | -0.4551 | 0.231   | 0.518   | 0.0324  | -0.2008 | 0.0102  | -0.315  | -0.2858 | -0.2945 |
| PY05141 | 0.8321  | 0.0922  | 0.4559  | 0.0353  | 0.1258  | -0.1575 | -0.208  | -0.5031 | -0.5241 | -0.1743 | -0.5363 | -0.2621 |
| PY02178 | -0.1422 | 0.0663  | 0.3391  | -0.0169 | -0.1958 | -0.086  | -0.0775 | 0.0015  | 0.105   | -0.0055 | 0.109   | -0.1046 |
| PY01862 | 0.1649  | -0.1173 | -0.3517 | 0.292   | -0.0986 | -0.3386 | -0.4324 | -0.2144 | -0.1079 | -0.1105 | -0.243  | -0.0314 |
| PY06467 | -1.3298 | -0.2169 | 0.1006  | -0.7888 | -0.0721 | -0.272  | 0.2005  | -0.1033 | -0.009  | -0.752  | -0.049  | 0.1301  |
| PY04677 | 0.6312  | 0.5743  | 0.4238  | -0.3018 | -0.3856 | 0.2581  | 0.1279  | -0.2013 | -0.0662 | -0.797  | -0.8473 | -0.1308 |
| PY04312 | 0.3765  | 0.3282  | -0.4999 | -0.5518 | -0.8489 | -0.7522 | -0.5897 | -0.0684 | -0.2092 | -0.1574 | 0.0004  | -0.5297 |
| PY01659 | 0.6409  | 0.3202  | 0.85    | 1.1001  | 0.037   | 0.137   | 0.2731  | -0.0788 | -0.0412 | -0.2373 | -0.489  | -0.1813 |
| PY03033 | 0.9893  | 0.3684  | -0.1404 | 0.2878  | -0.0942 | -0.0021 | 0.131   | -0.0034 | -0.1655 | 0.0272  | -0.7872 | 0.461   |
| PY02536 | -0.1638 | -0.1013 | -0.1631 | 0.255   | -0.0155 | 0.2146  | -0.156  | -0.3304 | -0.0427 | -0.2973 | -0.1033 | -0.4431 |
| PY05684 | 0.6842  | 0.1788  | -0.0673 | 0.8459  | 0.4351  | 0.3771  | 0.3085  | 0.0979  | -0.0477 | 0.2894  | -0.7087 | -0.2141 |
| PY05415 | 0.248   | 0.4214  | 0.0896  | 0.3266  | -0.3661 | -0.0541 | -0.0507 | 0.1948  | 0.1935  | 0.1587  | -0.1602 | -0.5666 |
| PY02606 | 0.2505  | 0.2417  | -0.0424 | 0.231   | -0.0751 | -0.1564 | 0.1928  | 0.0723  | -0.0165 | 0.2678  | 0.1211  | 0.2673  |
| PY03149 | 0.411   | 0.1998  | 0.3131  | 0.8401  | 0.1489  | 0.1782  | 0.3317  | 0.0937  | 0.031   | 0.6311  | 0.0595  | 0.4228  |
| PY03758 | 0.0403  | -0.0681 | -0.0142 | -0.0689 | -0.0118 | -0.1071 | -0.1262 | -0.107  | 0.1449  | -0.172  | 0.1381  | -0.9679 |

|         |         |         |         |         |         |         |         |         |         |         |         |         |
|---------|---------|---------|---------|---------|---------|---------|---------|---------|---------|---------|---------|---------|
| PY01877 | -1.3324 | -0.0421 | -0.0274 | -0.3905 | -0.6764 | 0.1479  | 0.2192  | 0.7002  | 0.0248  | 0.0703  | 0.6765  | -0.4194 |
| PY05667 | 0.5592  | 0.3811  | 0.3126  | 0.3812  | -0.2629 | -0.0713 | -0.2087 | -0.1796 | 0.1487  | -0.1723 | -0.4973 | -0.1473 |
| PY03976 | 1.0993  | 0.6506  | -0.265  | 0.2889  | -0.2735 | -0.1871 | -0.2874 | -0.0796 | 0.1005  | -0.02   | 0.0153  | -0.1766 |
| PY00622 | -1.1289 | -0.3331 | -0.4413 | -0.3493 | -0.1249 | 0.3571  | 0.1283  | 0.2272  | 0.2278  | -0.2425 | 0.2048  | -0.6825 |
| PY04292 | 0.0008  | 0.0037  | 0.0689  | -0.5001 | -0.1795 | -0.138  | 0.0037  | -0.2062 | -0.1839 | -0.2558 | 0.2332  | 0.0156  |
| PY00741 | 0.6675  | 0.3705  | 0.1389  | -0.2245 | -0.2155 | 0.0237  | 0.0698  | -0.1877 | 0.1072  | -0.0894 | -0.671  | 0.0414  |
| PY04574 | 0.4275  | 0.3657  | 0.0525  | -0.158  | -0.1563 | 0.0562  | 0.0623  | -0.217  | 0.2279  | -0.0475 | -0.2874 | 0.25    |
| PY06884 | -0.6579 | -0.5354 | -0.5126 | -0.0667 | 0.4158  | 0.1382  | -0.1256 | 0.0492  | -0.1517 | 0.0541  | 0.519   | 0.1325  |
| PY05337 | -1.247  | -0.2145 | -0.0182 | -0.2015 | -0.3013 | -0.2911 | -0.064  | 0.2539  | 0.5057  | 0.3275  | 0.5025  | -0.2045 |
| PY05418 | 0.5988  | 0.4075  | 1.0401  | 0.0433  | 0.1541  | -0.0959 | -0.0259 | -0.3987 | -0.0599 | -0.1739 | -0.321  | 0.012   |
| PY05605 | 0.6229  | 0.477   | 0.6467  | 0.1124  | -0.0282 | -0.0059 | 0.0759  | -0.3652 | 0.0432  | -0.2732 | -0.5446 | 0.3354  |
| PY02923 | 0.5444  | -0.1065 | -0.6216 | -0.2625 | 0.2832  | -0.1107 | -0.1365 | -0.2024 | -0.4757 | -0.1898 | 0.0751  | 0.0426  |
| PY04092 | 0.4322  | 0.0585  | 0.0868  | -0.0694 | 0.0737  | -0.047  | -0.069  | -0.2157 | -0.0672 | -0.2093 | -0.2338 | -0.022  |
| PY04459 | 0.2558  | -0.1342 | 0.1191  | 0.2558  | 0.3091  | 0.316   | 0.1692  | 0.2335  | 0.2747  | 0.2566  | 0.1035  | -0.1183 |
| PY00079 | -0.0362 | 0.174   | 0.0069  | -0.1754 | 0.1703  | 0.1497  | 0.3002  | 0.3576  | 0.1884  | 0.1791  | 0.5811  | 0.0021  |
| PY06755 | 0.3827  | 0.0129  | 0.0008  | -0.2905 | 0.1795  | -0.141  | -0.0082 | -0.1436 | -0.3004 | -0.3487 | -0.322  | -0.1477 |
| PY00043 | -0.4436 | 0.1149  | -0.1085 | -0.3717 | -0.0645 | -0.2054 | -0.0762 | -0.1037 | -0.1334 | -0.0362 | 0.0302  | 0.0952  |
| PY01386 | -0.0394 | -0.2946 | 0.0513  | 0.4862  | 0.0626  | -0.1121 | 0.0748  | 0.2088  | -0.0828 | 0.2385  | 0.2113  | 0.3092  |
| PY01744 | -0.6018 | 0.0093  | 0.1469  | -0.1165 | -0.1664 | -0.1797 | -0.106  | 0.0851  | 0.1048  | 0.0144  | -0.2018 | -0.6087 |
| PY01449 | -0.0723 | -0.2059 | -0.096  | -0.3446 | -0.2435 | 0.0651  | -0.0397 | -0.2147 | -0.2635 | -0.1372 | -0.1493 | -0.0269 |
| PY04143 | 0.0074  | -0.2479 | -0.2246 | -0.2742 | -0.2321 | -0.4978 | -0.1675 | -0.0354 | 0.2034  | -0.0407 | 0.3112  | -0.0984 |
| PY00064 | -0.1174 | -0.2151 | -0.6522 | -0.1192 | 0.0201  | 0.0609  | -0.2803 | 0.0353  | 0.0006  | -0.0262 | -0.0624 | -0.2568 |
| PY00029 | 0.4654  | 0.3093  | 0.5289  | -0.0598 | 0.1062  | -0.0841 | -0.0679 | 0.0044  | -0.1274 | -0.0438 | 0.0146  | 0.0923  |
| PY03498 | 0.0574  | -0.1328 | 0.1029  | -0.2989 | 0.0047  | 0.2175  | -0.1651 | 0.1644  | 0.0141  | 0.1041  | -1.2773 | -0.3438 |
| PY04232 | -0.2012 | -0.3242 | -0.389  | 0.1511  | -0.2271 | -0.1865 | -0.0984 | 0.3214  | 0.1434  | 0.4394  | -0.0841 | 0.2902  |
| PY05606 | -0.2555 | -0.2913 | -0.4346 | -0.0419 | -0.3355 | -0.1137 | -0.0542 | -0.0139 | -0.4233 | -0.2282 | -0.2756 | -0.0333 |
| PY03770 | 0.1729  | 0.0382  | 0.0778  | -0.0718 | -0.1652 | 0.1074  | 0.0856  | -0.2141 | -0.0477 | 0.063   | -0.1081 | 0.2038  |
| PY01451 | -1.2425 | -0.5646 | -0.2104 | -0.7382 | -0.3416 | -0.1493 | -0.077  | 0.1107  | -0.0783 | 0.0961  | 0.5752  | -0.4429 |
| PY07530 | 0.1579  | -0.4186 | -0.2874 | -0.3928 | -0.0321 | -0.2605 | -0.1139 | -0.2294 | 0.0999  | 0.072   | -0.187  | 0.3551  |
| PY05523 | 0.0689  | 0.0639  | -0.1256 | 0.3798  | 0.0963  | -0.0133 | -0.0963 | -0.1376 | 0.1668  | 0.4739  | -0.0269 | 0.0522  |
| PY03959 | 0.5067  | 0.2301  | 0.2939  | -0.2063 | -0.3054 | 0.0177  | -0.0041 | 0.0156  | 0.1024  | -0.8688 | -0.4918 | -0.4693 |
| PY02476 | 0.7581  | 0.5606  | 0.7795  | 0.378   | 0.1093  | 0.0011  | 0.2476  | -0.2987 | -0.053  | -0.1752 | -0.6159 | 0.1542  |
| PY03178 | -0.5485 | 0.2167  | -0.2221 | -0.2438 | 0.2375  | 0.1672  | 0.3009  | -0.0448 | -0.0456 | -0.0157 | -0.1276 | 0.0422  |
| PY04906 | 0.8222  | 0.4934  | 0.6856  | 0.0079  | 0.2652  | 0.1122  | 0.3693  | -0.1197 | 0.2634  | -0.0483 | -0.1673 | 0.3336  |
| PY00827 | -1.3298 | -0.4334 | -0.272  | -0.321  | 0.5194  | 0.0431  | -0.0776 | 0.3691  | -0.1939 | -0.0607 | 0.3616  | -0.3615 |
| PY07641 | 0.438   | -0.0354 | -0.3427 | -0.0778 | 0.2187  | -0.2736 | -0.4853 | -0.3571 | -0.2724 | -0.301  | -0.4843 | -0.4058 |
| PY05398 | -0.0468 | -0.382  | -0.6476 | 0.0218  | -0.1178 | 0.1681  | 0.171   | 0.1823  | 0.2766  | 0.4032  | -0.1001 | 0.2837  |
| PY06328 | 0.0515  | 0.1784  | 0.1531  | 0.4645  | 1.0228  | 1.9688  | 0.127   | 1.0135  | 0.2943  | 0.6939  | 0.9506  | 0.3854  |
| PY07274 | -0.2929 | 0.1468  | 0.3618  | -0.1275 | 0.0989  | 0.2941  | 0.0775  | -0.0539 | -0.2636 | -0.4372 | -0.1013 | -0.4183 |
| PY01468 | -0.0363 | 0.1048  | 0.0263  | 0.2598  | -0.1021 | 0.3397  | 0.033   | 0.0108  | -0.0707 | 0.6103  | -0.0494 | 0.3063  |
| PY06751 | 0.2329  | 0.1098  | 0.3887  | 0.0786  | -0.0789 | 0.0359  | 0.2723  | -0.0531 | 0.1649  | 0.3349  | 0.265   | 0.316   |
| PY06506 | -0.8534 | -0.4447 | -0.0885 | 0       | -0.0904 | -0.3403 | -0.1837 | -0.1045 | -0.1962 | 0.023   | 0.4988  | -0.2113 |
| PY00816 | 0.3311  | 0.0672  | -0.1299 | -0.4308 | -0.045  | -0.004  | -0.0993 | -0.3577 | -0.0767 | -0.1133 | 0.2701  | -0.0292 |
| PY07106 | -0.4141 | 0.0033  | -0.2474 | -0.1408 | -0.1656 | 0.3753  | 0.0829  | 0.1938  | -0.0213 | -0.2092 | 0.0753  | -0.6395 |
| PY00437 | -0.5257 | -0.0146 | 0.2367  | -0.4852 | -0.3344 | 0.128   | 0.0618  | 0.378   | 0.2125  | 0.0403  | 0.5881  | 0.139   |
| PY03295 | 0.4158  | 0.1529  | 0.3144  | 0.2458  | 0.1264  | -0.0407 | -0.0644 | -0.223  | -0.3116 | -0.0188 | -0.5834 | -0.1261 |
| PY04180 | -1.2004 | -0.522  | -0.2771 | -0.2551 | 0.3704  | -0.0817 | -0.0296 | -0.1422 | -0.2864 | -0.418  | -0.1105 | -0.3186 |
| PY05514 | -0.1215 | -0.0349 | 0.0631  | -0.9479 | -0.4628 | -0.3232 | -0.0288 | -0.0576 | 0.196   | -0.5113 | -0.2392 | 0.3601  |
| PY03119 | 0.1285  | 0.1077  | -0.1173 | -0.3685 | 0.0013  | -0.1836 | 0.0255  | -0.231  | -0.2921 | -0.7105 | -0.3355 | 0.0226  |
| PY00165 | -0.2546 | -0.1379 | -0.0916 | 0.8146  | 0.513   | 0.3345  | -0.021  | 0.6038  | -0.0744 | 0.889   | 0.1338  | 0.1622  |
| PY07829 | 0.1343  | -0.0406 | -0.0514 | -0.3662 | 0.3965  | -0.3219 | 0.1016  | -0.4075 | -0.2508 | -0.4093 | 0.0358  | -0.5696 |
| PY04081 | 0.1136  | -0.0603 | 0.0862  | 0.7066  | -0.3337 | 0.0755  | 0.4386  | 0.1042  | 0.3041  | 0.0905  | -0.2474 | 0.4028  |
| PY03935 | 0.0403  | 0.2747  | 0.1932  | -0.0198 | -0.1567 | -0.062  | -0.1262 | -0.214  | -0.1802 | -0.1652 | -0.3329 | -0.2077 |
| PY00606 | -1.5104 | -0.2784 | 0.0196  | -0.5844 | -0.5549 | -0.1106 | 0.132   | 0.73    | 0.3125  | 0.1235  | 0.732   | -0.5601 |
| PY07177 | -0.5863 | 0.0146  | -0.224  | -0.9435 | -0.9494 | -0.3031 | 0.0153  | -0.1223 | 0.2045  | -0.5479 | -0.4316 | -0.1707 |
| PY02821 | 0.0888  | -0.0695 | 0.1407  | 0.1129  | -0.1755 | -0.0234 | 0.1407  | 0.0036  | -0.1521 | -0.4519 | -0.2115 | 0.0227  |
| PY02352 | -0.4786 | -0.1167 | 0.2663  | -0.1436 | 0.0312  | -0.2417 | -0.271  | -0.4348 | -0.2682 | -0.1982 | -0.133  | -0.3497 |
| PY01610 | 0.1712  | -0.0575 | 0.3804  | -0.1185 | 0.1165  | -0.1367 | -0.1905 | -0.1768 | -0.1432 | -0.0014 | -0.494  | 0.1943  |
| PY04470 | -1.2886 | -0.868  | -0.5936 | -0.2156 | -0.1469 | -0.0907 | 0.1281  | 0.4669  | 0.2034  | 0.3534  | 0.6068  | 0.2032  |
| PY01517 | -0.7124 | -0.2105 | -0.464  | 0.161   | 0.3611  | 0.2383  | -0.0579 | 0.4391  | -0.1064 | 0.1814  | 0.4945  | -0.2021 |
| PY04764 | 0.0193  | 0.0814  | 0.2927  | -0.2097 | -0.1256 | -0.1043 | 0.2941  | -0.0999 | 0.3811  | -0.4095 | 0.032   | 0.1375  |
| PY06635 | 0.2038  | -0.1406 | 0.0259  | -0.3279 | 0.0294  | -0.3156 | -0.5711 | -0.0956 | -0.0621 | 0.3259  | 0.1866  | -0.0706 |
| PY03503 | 0.6375  | 0.2116  | 0.3917  | 0.009   | 0.0193  | -0.006  | 0.1139  | -0.1953 | 0.0082  | -0.2657 | -0.2179 | 0.3764  |

|         |         |         |         |         |         |         |         |         |         |         |         |         |
|---------|---------|---------|---------|---------|---------|---------|---------|---------|---------|---------|---------|---------|
| PY00931 | -0.1609 | 0.0742  | -0.3185 | -0.2201 | -0.4456 | 0.0295  | 0.0438  | 0.0881  | 0.1912  | 0.195   | -0.2956 | 0.0385  |
| PY04744 | -0.9733 | -0.0689 | -0.6429 | -0.6672 | -0.3883 | 0.0751  | 0.1292  | 0.335   | 0.2258  | 0.1613  | 0.1327  | -0.4665 |
| PY01819 | -0.2351 | 0.3629  | 0.1133  | 0.8063  | 0.1282  | -0.1276 | -0.0701 | 0.1757  | 0.0645  | 0.0919  | 0.6712  | -0.0357 |
| PY06984 | 1.4985  | -0.2504 | -0.2912 | -0.1377 | 1.1611  | -0.3866 | -0.0105 | -0.5422 | -1.0027 | 0.1602  | -0.1194 | 0.0874  |
| PY00205 | -0.0372 | 0.3327  | 0.4769  | -0.1982 | -0.5853 | 0.0446  | 0.1256  | -0.1406 | 0.3071  | -0.155  | -0.2982 | 0.0534  |
| PY04727 | -0.0415 | -0.1701 | -0.4673 | -0.4617 | -0.1561 | -0.1134 | -0.0008 | -0.2388 | -0.0702 | -0.1451 | -0.3427 | -0.1009 |
| PY02117 | -0.1313 | -0.0748 | 0.115   | 0.4959  | 0.0309  | -0.1456 | -0.0849 | 0.3121  | 0.164   | 0.4263  | 0.3494  | -0.1478 |
| PY01121 | -0.9431 | -0.4988 | -0.7372 | 0.1768  | -0.0995 | 0.0914  | 0.1714  | 0.6185  | 0.0429  | 0.1348  | 0.2857  | -0.286  |
| PY04895 | 0.1117  | 0.3814  | 0.2462  | 0.3293  | 0.2012  | 0.8143  | 0.4222  | -0.3344 | 0.0092  | -0.0309 | -0.4807 | -0.1604 |
| PY02818 | -0.1147 | -0.8491 | -0.5326 | -0.4768 | -0.3187 | -0.4873 | -0.0105 | 0.3333  | 0.1832  | 0.3946  | 0.3903  | 0.3136  |
| PY00733 | -1.0267 | -0.4896 | -0.1321 | -0.0509 | 1.4368  | -0.1376 | -0.3603 | -0.072  | -0.5147 | 0.1581  | 0.3385  | -0.1062 |
| PY03078 | 0.4145  | 0.4649  | 0.365   | 0.2644  | 0.0872  | 0.2505  | 0.1793  | -0.2175 | 0.1079  | -0.1321 | -0.6272 | 0.1882  |
| PY03555 | -0.2139 | 0.3406  | -0.7604 | -1.1423 | -0.928  | -0.1954 | 0.0712  | 0.2911  | 0.0558  | 0.2302  | 0.1498  | -0.1807 |
| PY07057 | 0.8279  | -0.1915 | -0.3899 | 1.1558  | -0.6662 | -0.1087 | -0.14   | 0.0062  | 0.3128  | -0.1549 | -0.5413 | 0.4772  |
| PY01544 | -0.1362 | -0.1198 | 0.0564  | 0.3169  | 0.093   | -0.1344 | -0.266  | 0.1074  | 0.1762  | 0.4395  | 0.2772  | 0.2146  |
| PY03872 | -0.8301 | -0.2872 | -0.0305 | -0.1162 | 0.3202  | -0.0887 | -0.0684 | 0.1168  | -0.1143 | -0.0317 | 0.367   | -0.2193 |
| PY02285 | -0.3555 | 0.0789  | 0.0792  | -0.581  | -0.5717 | -0.2231 | -0.1863 | -0.2577 | 0.1864  | -0.0988 | 0.4083  | -0.0943 |
| PY05996 | -0.4001 | 0.0138  | -0.1663 | 0.5629  | 0.0771  | 0.0167  | -0.6113 | 0.2627  | -0.0195 | 0.1332  | 0.4651  | -0.2274 |
| PY01342 | -0.5151 | -0.2093 | -1.2494 | -1.0283 | -1.2223 | -0.4927 | -0.0257 | 0.4901  | 0.3858  | 0.1756  | 0.2297  | -0.2718 |
| PY02199 | -1.3144 | -0.8059 | -0.5636 | -0.0087 | -0.7027 | -0.3695 | -0.2319 | 0.5031  | 0.2568  | 0.3118  | 0.8062  | -0.282  |
| PY03530 | 0.4213  | 0.2834  | 0.0863  | 0.0827  | 0.1174  | 0.2288  | 0.0698  | 0.2609  | 0.0054  | 0.7365  | 0.3024  | -0.1287 |
| PY05567 | -1.3698 | -0.6265 | -1.0267 | -1.1927 | -0.5752 | 0.1376  | 0.3819  | 0.4574  | 0.7893  | 0.7369  | 0.9129  | 0.0639  |
| PY03214 | 0.3324  | -0.0561 | -0.0455 | 0.1506  | 0.2319  | 0.0196  | -0.2815 | -0.1562 | -0.0872 | 0.0262  | 0.2036  | 0.2614  |
| PY03467 | 0.6596  | 0.4761  | -0.018  | 0.2824  | 0.2047  | 0.2993  | -0.1804 | -0.2201 | -0.4613 | -0.8847 | -0.6859 | -0.9116 |
| PY02739 | -0.3429 | -0.0499 | -0.0306 | -0.0375 | -0.1379 | 0.1238  | 0.1034  | 0.2377  | 0.3257  | -0.1517 | 0.1076  | -0.0552 |
| PY02472 | 1.1524  | 0.6333  | 0.7992  | 0.6527  | -0.2643 | 0.0659  | 0.3408  | -0.2989 | 0.1521  | -0.4477 | -0.7761 | 0.1356  |
| PY02639 | -1.0682 | -0.7602 | -0.3829 | -0.1773 | -0.4705 | -0.6173 | -0.2791 | 0.327   | 0.6436  | 0.5388  | 0.3795  | -0.1719 |
| PY05324 | 0.4094  | 0.3993  | 0.2902  | 0.0822  | -0.086  | 0.252   | 0.0859  | 0.1738  | 0.1161  | 0.1338  | -0.0485 | -0.2571 |
| PY07509 | 0.4217  | 0.1278  | 0.3284  | 0.5776  | 0.3174  | -0.0948 | -0.0602 | -0.115  | -0.1576 | 0.0973  | -0.1719 | 0.0599  |
| PY03388 | -0.0843 | -0.1047 | 0.0476  | 0.7396  | 0.0111  | -0.3086 | 0.0903  | 0.198   | 0.1819  | 1.0941  | 0.2631  | 0.3597  |
| PY02459 | -0.6326 | -0.4691 | -0.309  | -0.1948 | -0.1638 | -0.3183 | -0.1909 | 0.153   | 0.0053  | 0.5752  | 0.0225  | 0.2111  |
| PY04963 | 0.1015  | -0.0997 | -0.0561 | -0.1184 | -0.0368 | -0.2532 | -0.2539 | -0.2079 | -0.1827 | -0.2249 | -0.1113 | -0.0923 |
| PY06205 | -0.1777 | -0.2853 | 0.0254  | 0.3768  | 0.1874  | 0.0619  | -0.1512 | 0.2008  | 0.0889  | 0.775   | 0.1816  | -0.0534 |
| PY03598 | -0.2828 | -0.0468 | 0.2559  | 0.0431  | -0.2338 | -0.1255 | 0.0152  | 0.1271  | 0.0777  | 0.3618  | 0.1238  | 0.2253  |
| PY00073 | 0.6496  | 0.4792  | -0.0458 | 0.257   | -0.8463 | -0.0991 | -0.1608 | -0.235  | 0.0312  | -0.1079 | -0.8205 | 0.2155  |
| PY05822 | 0.3798  | 0.1397  | -0.0267 | 0.602   | 0.0467  | 0.1165  | -0.0488 | -0.0299 | 0.0133  | 0.4888  | -0.2097 | -0.3387 |
| PY02309 | 0.0007  | 0.0594  | 0.0174  | 0.6306  | -0.159  | -0.2266 | -0.2325 | 0.2608  | -0.0671 | 0.0948  | 0.234   | -0.1653 |
| PY00719 | -0.5707 | -0.607  | -0.4803 | 0.4565  | -0.3261 | -0.4674 | 0.1562  | 0.4345  | -0.3795 | 0.2394  | 0.1393  | 0.3328  |
| PY06395 | 0.4458  | 0.1589  | 0.4758  | 0.1067  | 0.0964  | 0.1285  | 0.2187  | -0.1387 | 0.4288  | 0.1693  | -0.2436 | 0.319   |
| PY01847 | 1.5679  | 1.0694  | 0.3983  | 0.5834  | -0.3003 | -0.0022 | 0.4818  | -0.2922 | 0.3831  | -0.4109 | -0.3717 | 0.6875  |
| PY04410 | -0.4879 | -0.1326 | -0.1027 | 0.4689  | -0.073  | 0.0302  | 0.0036  | 0.1025  | -0.0493 | -0.3077 | 0.0717  | -0.0638 |
| PY02148 | -1.445  | -0.7592 | -0.9335 | -0.8056 | -0.6397 | -0.1209 | 0.0601  | 0.9055  | 0.4069  | 0.1236  | 0.5106  | -0.3776 |
| PY00801 | 0.4883  | 0.1034  | 0.2239  | 0.1144  | -0.0269 | 0.1626  | 0.0891  | -0.1011 | -0.0322 | -0.2943 | -0.3632 | -0.1082 |
| PY06650 | -0.3436 | -0.2212 | 0.2948  | -0.5644 | -0.4268 | -0.2022 | 0.2523  | 0.1714  | -0.4408 | -0.6672 | 0.1606  | -0.2812 |
| PY00327 | -0.0019 | 0.0822  | -0.0831 | -0.7157 | -0.2929 | -0.1363 | -0.0256 | -0.24   | -0.2924 | -0.2031 | -0.2489 | 0.0359  |
| PY00458 | 0.0724  | 0.1754  | 0.1756  | 0.7983  | 0.1845  | 0.1854  | -0.2178 | -0.2743 | -0.1445 | -0.1363 | -0.0438 | 0.1434  |
| PY01798 | -0.5897 | 0.0471  | 0.4989  | -0.303  | -0.1573 | 0.3036  | 0.2769  | 0.1095  | 0.0398  | -0.121  | -0.0137 | -0.0102 |
| PY01931 | 0.165   | 0.0898  | 0.7903  | 0.0653  | -0.9852 | 0.1527  | 0.3359  | 0.1772  | 0.4359  | -0.282  | -0.3807 | 0.0769  |
| PY05316 | 0.3643  | 0.256   | 0.2338  | 0.2603  | 0.5291  | 0.385   | -0.2008 | -0.0985 | 0.0306  | -0.4717 | -0.4863 | -0.3824 |
| PY05168 | -0.2747 | -0.2868 | 0.0718  | 0.0111  | 0.5244  | -0.1546 | 0.1085  | -0.2564 | -0.2538 | -0.4344 | -0.0596 | 0.0157  |
| PY01984 | 0.6069  | 0.1074  | 0       | 0.0467  | 0.0456  | -0.0168 | -0.1945 | -0.4814 | -0.432  | -0.4039 | -0.307  | -0.4232 |
| PY04832 | -0.2706 | -0.0764 | 0.2594  | 0.7933  | -0.2481 | -0.0583 | -0.0235 | 0.4859  | 0.1705  | 0.5963  | 0.1865  | 0.0399  |
| PY03245 | -1.3977 | -0.3347 | -0.2189 | 0.196   | 0.0646  | -0.1989 | -0.1188 | 0.1908  | -0.6236 | 0.294   | -0.159  | -0.0989 |
| PY03916 | -0.5664 | -0.2633 | -0.5179 | -0.0889 | -0.0368 | -0.2352 | -0.1959 | 0.2302  | -0.0029 | 0.1806  | 0.812   | 0.1187  |
| PY02154 | -0.8399 | -0.3079 | 0.2231  | 0.4646  | 0.5136  | -0.0535 | -0.2608 | -0.0781 | -0.0972 | 0.3231  | 0.3081  | -0.0464 |
| PY00530 | -1.148  | 0.051   | 0.138   | -0.58   | -0.315  | -0.2731 | 0.1523  | 0.4129  | 0.0559  | -0.4894 | 0.8136  | -0.9682 |
| PY05342 | 0.6999  | 0.3462  | 0.0976  | 0.3668  | 0.3551  | 0.2777  | 0.1402  | -0.151  | -0.0376 | -0.0541 | -0.3148 | 0.053   |
| PY02469 | 0.0186  | 0.0931  | 0.2229  | -0.5886 | -0.1125 | -0.4069 | 0.0255  | -0.3265 | 0.0213  | -0.6559 | -0.0994 | -0.1551 |
| PY05423 | -0.0428 | -0.2072 | -0.0825 | -0.1322 | -0.3888 | -0.4414 | -0.037  | 0.191   | 0.2858  | 0.2174  | -0.0221 | 0.5737  |
| PY00296 | 0.378   | 0.1058  | -0.196  | 0.597   | -0.0066 | -0.5118 | 0.074   | 0.6634  | 0.4286  | -0.0092 | 0.4301  | -0.1761 |
| PY02732 | 0.1341  | -0.1091 | -0.0032 | 0.0261  | 0.1225  | -0.0286 | -0.0539 | -0.1865 | -0.0067 | -0.327  | 0.0333  | 0.1893  |
| PY01227 | -0.0376 | -0.0142 | 0.3821  | 0.0544  | -0.3186 | -0.4731 | -0.159  | -0.111  | 0.1944  | -0.6893 | -0.5451 | -0.5129 |
| PY02948 | -0.3861 | -0.0896 | 0.2781  | 0.0918  | 0.1568  | 0.101   | -0.0714 | -0.137  | -0.24   | -0.1806 | -0.3379 | -0.1272 |

|         |         |         |         |         |         |         |         |         |         |         |         |         |
|---------|---------|---------|---------|---------|---------|---------|---------|---------|---------|---------|---------|---------|
| PY04792 | 0.6946  | -0.047  | 0.2949  | 0.3838  | 0.4253  | 0.239   | -0.2828 | -0.2679 | -0.3413 | 0.524   | -0.223  | -0.0327 |
| PY02510 | 0.2348  | 0.1033  | 0.1501  | 0.1331  | 0.2594  | 0.1903  | -0.0125 | -0.2305 | -0.1041 | -0.1997 | -0.5662 | 0.0949  |
| PY05444 | 0.2873  | 0.2012  | 0.2897  | 0.0263  | -0.6223 | -0.8041 | -0.7207 | -0.7635 | -0.2026 | -0.2893 | 0.0372  | 0.0193  |
| PY02419 | -0.9257 | -0.4388 | -0.4262 | -0.1808 | 0.0634  | -0.1331 | 0.1266  | 0.2681  | 0.2156  | -0.2111 | 0.3729  | -0.1054 |
| PY05083 | 0.1182  | -0.2093 | -0.3014 | 0.1506  | 0.0739  | -0.0348 | 0.1371  | 0.0313  | 0.0426  | 0.2108  | 0.1602  | 0.5676  |
| PY00968 | -0.6204 | 0.542   | 0.2664  | 1.4687  | -0.4819 | 0.4389  | 0.5715  | 0.8857  | 0.3036  | 0.6801  | 0.5712  | 0.4612  |
| PY00961 | 0.1712  | -0.1833 | -0.4213 | -0.135  | 0.211   | -0.0463 | -0.2036 | -0.0224 | -0.2054 | -0.0686 | -0.2092 | 0.0286  |
| PY01330 | 0.2826  | 0.2246  | 0.602   | 0.7301  | -0.4082 | -0.0918 | -0.2067 | -0.0444 | -0.0521 | 0.042   | -0.5152 | -0.1552 |
| PY06472 | -0.2014 | -0.0903 | 0.3534  | -0.2177 | -0.228  | 0.1041  | 0.2523  | -0.1939 | 0.1894  | 0.024   | -0.3186 | 0.3857  |
| PY03822 | -0.614  | -0.2761 | -0.1093 | 0.1396  | 0.2526  | 0.1543  | 0.2017  | 0.0228  | 0.1243  | 0.0048  | 0.223   | -0.1479 |
| PY06369 | 0.9103  | 0.6443  | 0.6339  | 0.6472  | -0.365  | -0.173  | 0.1535  | -0.4024 | 0.0102  | -0.4223 | -0.7365 | 0.0533  |
| PY00769 | 0.7103  | 0.3425  | 0.1062  | 0.1635  | -0.4349 | -0.0261 | 0.1274  | -0.2563 | -0.131  | -0.0651 | -0.5205 | 0.2217  |
| PY05612 | 0.1804  | 0.0807  | 0.0376  | 0.7946  | 0.5096  | -0.048  | -0.0915 | -0.0393 | -0.0616 | 0.4576  | 0.3328  | 0.0777  |
| PY01151 | 0.2674  | 0.28    | 0.265   | -0.7311 | -0.5177 | -0.0705 | 0.0862  | -0.6034 | -0.0371 | -0.7288 | -0.5795 | 0.0838  |
| PY04000 | -0.128  | -0.1229 | -0.1145 | 0.2679  | 0.4212  | -0.0038 | -0.1271 | 0.0983  | -0.2112 | -0.0576 | 0.4239  | -0.0651 |
| PY02772 | -0.7221 | -0.7127 | -0.1792 | -0.8806 | -0.5559 | 0.0743  | 0.0407  | 0.0453  | 0.0064  | -0.4537 | -0.0371 | -0.4898 |
| PY07577 | 0.3281  | -0.003  | -0.1086 | -0.5065 | 0.0877  | -0.0426 | 0.1049  | -0.0032 | -0.0751 | -0.2859 | -0.2651 | -0.5728 |
| PY04919 | -0.492  | -0.1778 | 0.1883  | -0.57   | 0.011   | -0.1803 | -0.0588 | -0.2376 | -0.0583 | -0.2021 | 0.2442  | 0.1132  |
| PY01635 | 0.3427  | 0.649   | 1.1245  | -0.4898 | -0.9225 | -0.472  | 0.1808  | -0.6343 | 0.2365  | -0.8041 | -0.7078 | -0.1808 |
| PY04243 | -0.0702 | 0.1243  | 0.095   | 0.0752  | 0.2486  | -0.1488 | 0.0948  | -0.4671 | 0.1585  | -0.2339 | -0.2649 | -0.0686 |
| PY05092 | -0.7984 | -1.0531 | -0.9355 | -0.8958 | -0.4444 | -0.3236 | 0       | -0.0149 | 0.0753  | 0.3892  | 0.7058  | 1.5501  |
| PY04567 | -0.7849 | -0.558  | -0.4297 | 0.218   | 0.3189  | 0.212   | 0.2708  | 0.6632  | 0.3281  | 0.0576  | 1.0565  | 0.0376  |
| PY02796 | -0.4377 | -0.2376 | 0.0461  | -0.0057 | 0.4043  | 0.0071  | -0.1741 | 0.1016  | -0.1868 | 0.0302  | 0.4284  | 0.1576  |
| PY00400 | 0.2134  | 0.0805  | -0.2654 | 0.3921  | 0.5024  | 0.0833  | -0.3618 | 0.0417  | 0.0571  | 0.1359  | 0.5647  | 0.305   |
| PY00563 | 0.164   | -0.0103 | 0.3604  | -0.1807 | -0.2571 | 0.1345  | 0.057   | -0.1125 | 0.3895  | -0.2306 | -0.4933 | 0.0151  |
| PY02246 | -0.2295 | -0.5783 | -0.4995 | -0.4378 | -0.1188 | -0.2688 | 0.1296  | 0.0853  | 0.1629  | 0.0749  | 0.3257  | 0.0658  |
| PY01623 | -0.5478 | 0.0802  | 0.1919  | -0.4435 | -0.0596 | -0.0321 | -0.0524 | 0.1542  | 0.0064  | -0.2669 | 0.1355  | -0.4532 |
| PY03617 | -0.1631 | -0.0052 | 0.239   | -0.6045 | -0.2485 | -0.3676 | -0.2477 | -0.3582 | -0.1327 | -0.2794 | 0.0531  | -0.2972 |
| PY03600 | -0.4749 | 0.121   | 0.0594  | -0.0857 | 0.0504  | 0.1109  | 0.004   | 0.1444  | 0.299   | 0.0465  | 0.3886  | 0.1907  |
| PY07025 | -0.6201 | -0.1415 | -0.3284 | 0.0781  | 0.0173  | 0.2256  | 0.1153  | 0.2951  | 0.0868  | -0.1262 | -0.2191 | -0.4658 |
| PY05510 | 0.0909  | -0.1314 | -0.1011 | -0.0867 | -0.1687 | -0.1306 | -0.0449 | -0.2379 | 0.0038  | 0.0881  | 0.0192  | -0.0965 |
| PY00239 | 1.3925  | 0.0224  | 0.2031  | 2.3783  | 2.3916  | 1.9759  | 0.7582  | 1.0101  | -0.0659 | 1.4894  | 1.871   | 0.3187  |
| PY04972 | 0.5784  | 0.0766  | 0.9379  | -0.0601 | -0.3099 | 0.2488  | 0.3551  | 0.1482  | -0.4562 | -0.0504 | -0.6964 | 0.0991  |
| PY07301 | -0.0499 | -0.1906 | -0.4202 | 0.1317  | -0.0489 | -0.0423 | -0.0301 | -0.0172 | 0.4707  | 0.1962  | 0.0331  | 0.4266  |
| PY00155 | -0.1165 | -0.1462 | -0.0595 | 0.1622  | 0.0339  | -0.0782 | -0.3718 | -0.11   | -0.108  | 0.0267  | 0.1428  | -0.1207 |
| PY05292 | 0.3874  | 0.2486  | -0.4657 | -0.2333 | 0.2078  | 0.2908  | 0.0092  | 0.5854  | 0.0843  | 0.3774  | 0.5029  | -0.1279 |
| PY00522 | -0.7769 | -0.4518 | -0.7241 | 0.3761  | -0.3822 | -0.445  | -0.2009 | 0.3945  | 0.3112  | 0.4153  | 1.0572  | 0.3294  |
| PY02931 | 0.2703  | 0.1117  | 0.0347  | 0.6993  | 0.2034  | 0.0849  | -0.0204 | 0.0884  | -0.166  | 0.3167  | 0.3303  | 0.1221  |
| PY04808 | 0.1866  | 0.1675  | -0.0559 | 0.2309  | -0.1356 | -0.1408 | -0.3101 | 0.0163  | 0.0269  | -0.1162 | -0.1866 | -0.2412 |
| PY04421 | -0.1649 | -0.283  | -0.4103 | 0.1635  | -0.0795 | -0.4874 | -0.1499 | 0.1875  | 0.2239  | -0.0335 | 0.1197  | -0.0376 |
| PY04270 | 0.2262  | 0.1752  | 0.1226  | 0.0052  | -0.1277 | 0.1413  | 0.41    | 0.1403  | 0.0901  | -0.041  | -0.3818 | 0.2789  |
| PY04522 | -0.0922 | -0.0464 | -0.32   | 0.3891  | 0.1321  | 0.046   | -0.0194 | 0.1972  | 0.0278  | 0.2937  | 0.5793  | 0.0561  |
| PY05194 | -0.004  | 0.2313  | 0.3691  | -0.4054 | -0.4009 | -0.2372 | 0.0276  | -0.1809 | 0.1653  | -0.1316 | -0.1368 | 0.1137  |
| PY01130 | -0.4934 | 0.0801  | 0.1452  | -0.0079 | -0.2437 | 0.3935  | -0.0624 | 0.1406  | -0.1933 | -0.705  | -0.7329 | -0.6576 |
| PY03175 | 0.2581  | 0.1157  | 0.2245  | 0.2534  | 0.0268  | -0.0366 | 0.0427  | -0.1232 | -0.0388 | -0.0561 | -0.4598 | 0.1793  |
| PY07388 | -0.8322 | -0.3557 | -0.1863 | -0.5345 | 0.4091  | 0.2287  | 0.0581  | 0.175   | 0.0527  | -0.2317 | 0.1196  | -0.3314 |
| PY00182 | 0.2271  | -0.093  | 0.2365  | 0.1554  | 0.0261  | -0.0974 | -0.1745 | -0.162  | -0.0047 | 0.1741  | -0.1694 | 0.0248  |
| PY03413 | -0.4558 | -0.1551 | 0.0802  | -0.6666 | -0.6578 | 0.0794  | 0.5784  | 0.3367  | 0.9483  | 0.0454  | 0.3346  | 0.4287  |
| PY03674 | -0.0772 | 0.096   | -0.1261 | -0.6223 | -0.4099 | -0.0155 | -0.1152 | -0.4282 | -0.2859 | -0.5754 | -0.3105 | -0.2208 |
| PY06525 | -1.328  | -0.393  | 0.0134  | -0.9653 | -0.4194 | 0.2171  | -0.0468 | 0.3044  | 0.3741  | 0.1063  | 0.4396  | -0.1957 |
| PY03710 | -0.2174 | -0.112  | -0.1432 | -0.0314 | 0.3682  | 0.1295  | -0.1873 | 0.0415  | -0.2213 | 0.2441  | 0.1422  | -0.0797 |
| PY06716 | -0.0189 | 0.0794  | -0.0635 | 1.0998  | -0.563  | 0.1447  | 0.0368  | 0.0152  | 0.4228  | -0.7972 | -0.2562 | 0.4628  |
| PY02910 | 0.2551  | 0.1256  | 0.2987  | 0.2853  | 0.0266  | -0.0544 | -0.2087 | -0.1961 | -0.3058 | -0.6528 | -0.1839 | -0.2893 |
| PY03291 | -0.2034 | -0.3056 | -0.846  | -0.2651 | 0.0412  | -0.3933 | -0.4131 | -0.1578 | -0.3979 | 0.0366  | -0.2527 | -0.0182 |
| PY03001 | 0.3181  | 0.0572  | 0.2045  | 0.5357  | 0.2571  | 0.0763  | -0.0241 | -0.1613 | -0.0157 | 0.119   | -0.0799 | -0.0389 |
| PY02052 | -0.3557 | 0.0096  | 0.2743  | 0.1476  | -0.0446 | 0.0512  | -0.1269 | -0.1014 | -0.3693 | 0.1304  | 0.1184  | -0.3043 |
| PY02567 | -0.2397 | -0.1362 | 0.0415  | 0.0286  | -0.3438 | -0.1206 | 0.1289  | 0.2531  | 0.3384  | 0.0181  | -0.0912 | 0.0328  |
| PY07150 | 0.102   | 0.1251  | 0.4208  | -0.3641 | -0.0972 | -0.133  | -0.1985 | -0.3289 | -0.2141 | -0.2584 | -0.3605 | -0.283  |
| PY06507 | -0.1899 | 0.0957  | 0.0183  | 0.1331  | 0.2079  | 0.0915  | -0.1696 | 0.163   | -0.1826 | -0.0721 | 0.2885  | -0.3379 |
| PY05283 | -0.5267 | -0.0615 | 0.0522  | -0.0532 | 0.4233  | -0.065  | -0.0761 | 0.1824  | -0.0147 | -0.3839 | 0.0356  | 0.1134  |
| PY03639 | -0.6139 | -0.2979 | 0.0475  | -0.08   | 0.3094  | 0.0578  | -0.3161 | -0.2636 | -0.2913 | -0.3129 | -0.1989 | -0.3193 |
| PY02328 | 0.2912  | 0.1646  | 0.3493  | -0.3556 | -0.0408 | 0.2488  | 0.14    | -0.3471 | 0.1905  | -0.2307 | -0.5027 | 0.2786  |
| PY01935 | -0.1727 | -0.1122 | -0.0226 | -0.2575 | 0.5235  | 0.0819  | 0.3233  | 0.2234  | 0.2894  | 0.07    | -0.2195 | 0.0774  |

|         |         |         |         |         |         |         |         |         |         |         |         |         |
|---------|---------|---------|---------|---------|---------|---------|---------|---------|---------|---------|---------|---------|
| PY04928 | -0.0967 | -0.0544 | -0.2133 | -0.2125 | 0.3764  | 0.3273  | 0.2291  | 0.0854  | -0.0923 | -0.3062 | -0.0441 | 0.1294  |
| PY03411 | 0.0135  | 0.0514  | 0.2946  | 0.1137  | -0.0347 | 0.3229  | 0.2682  | 0.2816  | 0.2805  | -0.2315 | -0.3369 | -0.1036 |
| PY00614 | -0.0343 | 0.0454  | 0.2016  | 0.1533  | 0.0216  | 0.1758  | -0.0708 | 0.0577  | -0.302  | -0.0402 | 0.3571  | -0.0682 |
| PY01032 | -0.2308 | -0.0064 | 0.1176  | 0.1115  | -0.6193 | -0.3613 | -0.2032 | 0.2948  | 0.1565  | 0.0175  | -0.2655 | 0.3751  |
| PY02270 | 0.653   | 0.3131  | 0.7557  | 0.0545  | -0.6753 | 0.0208  | 0.4464  | -0.2737 | 0.5404  | 0.3398  | -0.7183 | 0.6439  |
| PY02919 | -0.529  | -0.2525 | -0.0817 | -0.0382 | 0.0449  | -0.507  | -0.3611 | -0.0297 | -0.1699 | -0.038  | 0.5059  | -0.1118 |
| PY07117 | 0.8726  | 0.7967  | 1.0466  | 0.241   | -0.3847 | 0.3099  | 0.7445  | -0.073  | 0.4462  | 0.2184  | -0.5554 | 0.6475  |
| PY03421 | -0.4075 | -0.008  | -0.1084 | 0.0996  | 0.5008  | 0.2112  | -0.0801 | 0.0149  | -0.2784 | -0.5343 | -0.2044 | -0.4917 |
| PY06200 | -0.9782 | -0.2173 | 0.0976  | -0.4848 | -0.291  | -0.1301 | -0.0893 | 0.0365  | 0.0252  | -0.2313 | 0.0737  | -0.3734 |
| PY03960 | 0.2154  | 0.349   | 0.3255  | 0.4138  | -0.3319 | 0.1694  | 0.1303  | -0.1907 | 0.133   | -0.5446 | -0.6794 | 0.2298  |
| PY00658 | 0.4585  | 0.6036  | 0.8673  | 0.2488  | -0.1389 | -0.1032 | -0.0699 | -0.5669 | -0.0909 | -0.3566 | -0.3931 | -0.0945 |
| PY06777 | -0.3947 | -0.2006 | -0.1676 | 0.3818  | 0.2696  | 0.1768  | -0.1003 | -0.1867 | -0.3939 | 0.159   | -0.0275 | -0.3027 |
| PY03349 | -0.0057 | -0.0227 | -0.1906 | 0.8273  | 0.6941  | 0.2675  | 0.211   | 0.4831  | 0.4536  | 1.0372  | 0.7028  | 0.3166  |
| PY05593 | -0.4383 | -0.2185 | -0.4528 | -0.6327 | -0.5461 | -0.2409 | 0.0672  | 0.0292  | 0.1952  | 0.1793  | 0.0789  | 0.4628  |
| PY03817 | -0.0184 | -0.0272 | -0.0273 | -0.1395 | -0.6365 | -0.248  | -0.1294 | -0.1162 | -0.0699 | -0.1529 | -0.4284 | 0.5201  |
| PY03590 | 1.037   | 0.6305  | 0.0317  | -0.8179 | 0.0075  | -0.4317 | 0.1151  | -0.0455 | 0.3457  | -0.1902 | 0.1167  | -0.0075 |
| PY02398 | -0.0903 | 0.0334  | -0.3959 | 0.0597  | -0.4431 | -0.2666 | 0.2284  | 0.062   | 0.1546  | 0.4333  | 0.0451  | 0.607   |
| PY06838 | -0.2126 | -0.0825 | -0.1312 | 0.264   | 0.0456  | -0.2247 | -0.0528 | -0.1415 | -0.1053 | -0.0773 | 0.1268  | 0.0542  |
| PY02439 | 1.2979  | 0.426   | 0.3829  | 0.5634  | -0.4194 | -0.215  | -0.0424 | -0.4094 | 0.1276  | -0.2873 | -1.2851 | 0.2061  |
| PY05847 | -0.1283 | 0.082   | -0.082  | -0.0493 | -0.2243 | -0.0148 | -0.3137 | -0.1872 | -0.0212 | -0.2177 | 0.0913  | -0.1887 |
| PY05358 | 0.4261  | 0.3139  | 0.2369  | 0.6143  | 0.0744  | 0.1824  | -0.0499 | -0.5356 | -0.2477 | -0.3446 | -0.5159 | -0.1142 |
| PY04017 | 0.4001  | 0.4175  | 0.2193  | -0.6471 | -0.4513 | -0.6355 | 0.4368  | -0.702  | -0.0171 | -0.7753 | -0.4294 | -0.1627 |
| PY06573 | 0.8761  | 0.141   | 0.2646  | 0.2953  | 0.1605  | -0.0523 | 0.0461  | -0.2262 | -0.4266 | -0.3987 | -0.3819 | 0.0915  |
| PY01115 | 0.2573  | 0.1968  | 0.1964  | 0.1221  | -0.0209 | 0.0023  | 0.0053  | -0.3612 | 0.0821  | -0.531  | -0.4267 | 0.065   |
| PY04003 | -0.2957 | -0.182  | -0.3029 | 0.2291  | 0.4862  | -0.1895 | -0.0148 | -0.2461 | -0.0826 | 0.3596  | -0.0656 | -0.1027 |
| PY04079 | -1.1984 | -0.1671 | -0.0814 | -0.5953 | 0.0546  | 0.1106  | 0.0766  | 0.0589  | -0.0731 | -0.0817 | 0.315   | -0.0735 |
| PY07373 | 0.2677  | -0.1539 | -0.5625 | 0.1135  | -0.069  | -0.1112 | -0.0837 | 0.0054  | -0.1498 | 0.1897  | -0.0897 | 0.3558  |
| PY02425 | -0.4932 | -0.0784 | -0.0803 | -0.6454 | -0.2818 | -0.3037 | -0.4208 | -0.1059 | -0.3764 | -0.4027 | -0.1068 | -0.2628 |
| PY04319 | 0.1308  | 0.0641  | 0.0353  | 0.4309  | 0.3513  | 0.2035  | -0.0877 | 0.1025  | 0.0923  | 0.2144  | 0.5627  | -0.0735 |
| PY03165 | -0.6056 | -0.0242 | 0.2435  | -0.0535 | -0.2238 | -0.3954 | -0.1453 | 0.1125  | -0.0679 | -0.1289 | 0.2724  | -0.2087 |
| PY05018 | -0.0209 | 0.5249  | 0.1306  | -0.2994 | 0.1779  | 0.0385  | 0.3119  | -0.1418 | 0.3907  | 0.0709  | 1.3178  | -0.2002 |
| PY03753 | 0.8722  | 0.573   | 0.7641  | 0.0802  | -0.2996 | 0.2896  | 0.5396  | -0.2026 | 0.1697  | -0.1089 | -0.7166 | 0.2634  |
| PY01056 | 0.2735  | -0.0654 | -0.0477 | 0.1377  | -0.0609 | 0.0686  | -0.0284 | 0.0613  | -0.1621 | -0.5688 | 0.0033  | -0.1406 |
| PY03452 | 0.731   | 0.4671  | 0.28    | -0.262  | 0.1514  | -0.5395 | 0.3284  | -0.6135 | -0.0461 | 0.188   | -0.2402 | 0.1644  |
| PY07462 | -0.1933 | 0.0734  | 0.3507  | -0.7895 | -0.464  | 0.1824  | 0.184   | -0.3997 | 0.2323  | -0.5147 | -0.3963 | 0.3335  |
| PY00216 | 0.4289  | 0.3443  | 0.25    | -0.4291 | -0.2772 | -0.2472 | 0.1112  | -0.4518 | 0.1111  | -0.4123 | -0.7218 | 0.1074  |
| PY05835 | -0.0296 | 0.2858  | -0.1316 | -0.1015 | 0.3039  | 0.2435  | 0.1397  | -0.1371 | -0.0312 | -0.2754 | 0.0629  | 0.115   |
| PY00248 | 0.0822  | -0.1335 | -0.0576 | 0.4767  | 0.343   | 0.0822  | 0.0183  | 0.1735  | -0.2595 | 0.3291  | 0.9056  | -0.0718 |
| PY05530 | 0.0386  | 0.0952  | -0.3002 | 0.6796  | 0.4323  | 0.3009  | -0.1386 | 0.3705  | -0.3397 | 0.4355  | 0.2596  | 0.1132  |
| PY01195 | -0.6323 | -0.3138 | -0.1892 | 0.9269  | 0.0213  | 0.1286  | -0.3242 | 0.4087  | -0.1709 | 0.132   | 0.1737  | -0.2223 |
| PY05869 | -0.755  | -0.0229 | 0.1188  | 0.4954  | -0.1209 | -0.0287 | -0.0305 | -0.073  | 0.0359  | 0.059   | 0.0052  | -0.0305 |
| PY05486 | 0.6438  | 0.2477  | 0.2537  | 0.1961  | 0.1374  | -0.0716 | -0.2196 | -0.4528 | -0.1413 | -0.3687 | -0.3898 | -0.301  |
| PY02803 | -1.2935 | -0.3203 | 0.15    | -0.5269 | -0.1283 | -0.0683 | -0.1333 | 0.0614  | -0.171  | -0.0994 | 0.2637  | -0.5662 |
| PY00473 | -0.2214 | -0.2369 | -0.7912 | -1.1694 | -0.2114 | -0.0228 | 0.3116  | 0.3896  | -0.0435 | -0.2646 | 0.0497  | -0.481  |
| PY01897 | -0.2756 | 0.0171  | -0.2075 | 0.0443  | -0.3379 | -0.4202 | 0.116   | 0.0913  | 0.2668  | 0.8405  | -0.1005 | 0.6434  |
| PY01588 | 0.1076  | 0.1706  | 0.1941  | 0.2174  | -0.4368 | -0.3098 | -0.3198 | -0.1157 | -0.092  | 0.0706  | -0.0508 | -0.1947 |
| PY00684 | 0.5844  | 0.2509  | -0.0936 | 0.1455  | 0.0714  | 0.2723  | 0.1327  | 0.1875  | 0.175   | 0.1921  | -0.1437 | 0.259   |
| PY01322 | 0.134   | 0.552   | -0.7287 | -0.1783 | 0.0842  | -0.1977 | 0.0699  | 0.6318  | 0.0557  | 0.2532  | 0.2932  | -0.4838 |
| PY06358 | -0.1323 | -0.2215 | -0.8265 | 0.135   | -0.2901 | -0.258  | -0.0699 | -0.0093 | 0.2993  | 0.1954  | 0.3733  | 0.2036  |
| PY05809 | -1.1111 | -0.4337 | -0.1848 | -0.7042 | -0.4805 | -0.47   | -0.1611 | 0.2695  | 0.0996  | 0.2293  | 0.507   | -0.104  |
| PY07355 | -0.0665 | 0.0495  | 0.1539  | -0.2837 | -0.1827 | 0.0281  | -0.0542 | -0.234  | 0.0534  | 0.2256  | -0.0026 | 0.2256  |
| PY03574 | 0.1743  | -0.1083 | -0.1332 | -0.3706 | -0.1509 | -0.299  | -0.1607 | -0.4343 | -0.3368 | -0.4694 | -0.7609 | -0.3401 |
| PY00380 | 0.3774  | 0.2008  | 0.0652  | 0.1154  | -0.1589 | -0.1227 | -0.1465 | 0.2461  | 0.0721  | 0.1502  | 0.0627  | 0.2805  |
| PY03122 | 0.6614  | 0.2236  | 0.71    | -0.0773 | -0.014  | 0.2878  | 0.0464  | -0.0081 | 0.1749  | -0.0407 | -0.4421 | 0.3488  |
| PY06061 | -0.1502 | -0.111  | -0.4448 | -0.2654 | -0.1526 | -0.2009 | -0.3686 | 0.012   | -0.4564 | -0.0528 | 0.3287  | -0.1712 |
| PY07637 | -0.4719 | 0.1446  | 0.0151  | 0.5754  | -0.1358 | -0.0439 | -0.0727 | 0.4904  | 0.1794  | -0.1563 | 0.0064  | -0.2865 |
| PY06247 | -0.4648 | -0.0716 | -0.2011 | -0.3859 | -0.4833 | -0.3314 | -0.1598 | 0.2721  | 0.2028  | -0.3395 | 0.8265  | 0.1158  |
| PY02979 | 0.242   | 0.0027  | 0.0935  | -0.1957 | 0.1563  | 0.3387  | 0.2517  | -0.0351 | 0.0545  | 0.3779  | 0.2519  | 0.183   |
| PY06516 | -0.1482 | 0.0174  | 0.0735  | -0.0652 | 0.0735  | 0.1217  | 0.1837  | 0.1157  | 0.6221  | 0.2349  | 0.0431  | 0.3856  |
| PY02926 | 0.066   | -0.4124 | 0.1715  | -0.7246 | -0.121  | 0.0252  | 0.0566  | -0.6943 | -0.1947 | -0.6561 | -0.1854 | 0.1345  |
| PY01072 | -0.1311 | -0.0698 | -0.097  | -0.2744 | -0.2042 | -0.1324 | -0.0851 | -0.0232 | -0.0714 | -0.0232 | -0.205  | 0.0629  |
| PY00595 | 0.0372  | 0.1036  | 0.1842  | -0.3474 | -0.0378 | -0.0941 | -0.2784 | -0.351  | -0.0748 | -0.2707 | -0.1225 | -0.2679 |
| PY05076 | -0.8879 | -0.629  | -1.2515 | -0.3733 | 0.2643  | 0.3304  | 0.1621  | 0.5058  | 0.226   | 0.0966  | 0.0863  | -0.2628 |

|         |         |         |         |         |         |         |         |         |         |         |         |         |
|---------|---------|---------|---------|---------|---------|---------|---------|---------|---------|---------|---------|---------|
| PY05694 | -0.2912 | -0.0221 | 0.1696  | 0.1129  | -0.1679 | -0.2577 | -0.2457 | -0.1414 | -0.0418 | -0.0157 | 0.0918  | -0.097  |
| PY02589 | -1.0055 | -0.2751 | -0.015  | -0.7702 | -0.3002 | -0.3701 | -0.3639 | -0.2183 | 0.1324  | -0.2266 | -0.2422 | -0.0847 |
| PY06962 | 0.1855  | 0.2615  | 0.1423  | 0.2169  | 0.2296  | -0.183  | -0.1432 | -0.1438 | -0.0518 | -0.1404 | -0.1187 | -0.0831 |
| PY05544 | -0.4521 | -0.487  | -0.7272 | -0.2781 | 0.0659  | 0.0259  | -0.0708 | 0.2861  | 0.0532  | 0.212   | 0.0139  | -0.4952 |
| PY00752 | -1.2136 | -0.6083 | -0.3168 | -0.1659 | -0.0384 | -0.3299 | 0.0448  | 0.1795  | 0.4192  | 0.6539  | 1.0401  | 0.2326  |
| PY05048 | -0.2965 | 0.0299  | 0.0705  | -0.0943 | -0.1471 | -0.5543 | -0.1835 | 0.0818  | 0.0307  | 0.0547  | 0.6038  | -0.047  |
| PY03014 | -0.6112 | -0.3357 | -0.3304 | 0.3979  | 0.26    | -0.1228 | -0.0701 | -0.0236 | -0.0773 | 0.3171  | 0.3106  | 0.3386  |
| PY06876 | 0.6798  | 0.2261  | 1.0079  | 0.3661  | -0.0906 | -0.0802 | -0.4176 | -0.5123 | -0.1853 | -0.4797 | -1.0927 | -0.3909 |
| PY01826 | 0.105   | 0.1174  | 0.1448  | 0.1513  | -0.3193 | 0.329   | -0.0836 | -0.1288 | -0.1405 | -0.0872 | -0.4868 | 0.1562  |
| PY00629 | 0.3606  | -0.122  | -0.3673 | 0.7267  | 0.501   | 0.3606  | 0.1613  | 0.2466  | -0.1576 | 0.5771  | -0.5181 | 0.1639  |
| PY02029 | -0.4206 | 0.0513  | 0.306   | 0.1752  | 0.1985  | 0.1238  | 0.18    | 0.0461  | 0.0284  | 0.383   | 0.5205  | 0.4644  |
| PY02066 | -0.9123 | 0.0888  | -0.3253 | -0.7467 | -0.0539 | -0.0158 | 0.2417  | 0.3609  | 0.169   | -0.1568 | 0.0796  | 0.3596  |
| PY03112 | 0.4369  | 0.2007  | 0.0039  | 0.0717  | 0.2165  | -0.076  | -0.0072 | -0.2959 | -0.0321 | -0.0334 | -0.1286 | 0.0552  |
| PY02188 | -0.2306 | -0.101  | 0.4084  | 0.2058  | 0.3004  | 0.0917  | 0.2192  | -0.0417 | 0.1681  | 0.1477  | -0.0784 | 0.38    |
| PY04055 | -0.4748 | 0.2818  | 0.5441  | -0.5873 | -0.1121 | 0.5     | 0.398   | 0.5487  | 0.5627  | 0.0289  | 0.3584  | -0.1695 |
| PY03649 | -0.164  | -0.1548 | -0.6485 | 0.5647  | 0.2272  | 0.1649  | -0.1655 | 0.0552  | -0.2799 | 0.3652  | 0.0286  | 0.0497  |
| PY01117 | 0.0407  | -0.125  | 0.0397  | -0.0351 | 0.2587  | -0.3149 | -0.2803 | 0.0317  | -0.207  | 0.3654  | 0.3451  | -0.2357 |
| PY05539 | -0.1819 | 0.1459  | 0.1113  | -1.0628 | -0.1678 | 0.3808  | 0.178   | -0.3678 | -0.0805 | -0.3435 | -0.604  | 0.1054  |
| PY05100 | 0.605   | 0.275   | 0.378   | -0.0545 | -0.1011 | -0.2365 | -0.1365 | -0.205  | -0.0945 | -0.5337 | -0.2944 | 0.0732  |
| PY05185 | 0.0105  | -0.2954 | -0.398  | -0.0967 | -0.0091 | 0.0375  | -0.2027 | -0.0626 | -0.0153 | 0.041   | 0.1022  | 0.1829  |
| PY02844 | 0.2443  | 0.3386  | 0.0802  | 0.3239  | 0.0938  | 0.2     | 0.104   | 0.3813  | 0.1139  | 0.4906  | -0.2775 | 0.1301  |
| PY03553 | -0.15   | -0.3493 | -0.2692 | -0.4584 | 0.2201  | -0.0206 | 0.0852  | -0.0391 | 0.0608  | 0.1366  | 0.2449  | 0.1242  |
| PY06393 | -0.4501 | -0.5059 | -0.4512 | -0.502  | -0.227  | -0.0493 | 0.1116  | 0.5208  | 0.3326  | -0.1151 | 0.3142  | -0.2785 |
| PY05832 | 0.1609  | 0.1341  | -0.2398 | 1.2766  | 1.5402  | 1.6047  | -0.2154 | 0.8103  | -0.0786 | 0.8986  | 1.2613  | -0.1795 |
| PY03299 | -0.7823 | -0.1863 | -0.269  | -0.2653 | -0.1006 | 0.1972  | -0.1299 | 0.2496  | 0.1974  | -0.0968 | 0.05    | -0.7423 |
| PY05812 | 1.1929  | 0.7249  | 0.941   | 0.8849  | -0.1876 | 0.5065  | 0.6598  | -0.0763 | 0.4169  | 0.1705  | -0.0366 | 0.7867  |
| PY05683 | 0.3617  | 0.4417  | 0.2688  | -0.8423 | -0.2503 | -0.0367 | 0.1539  | -0.5959 | -0.0873 | -0.6449 | -0.6981 | -0.4515 |
| PY06599 | -1.5784 | -0.8242 | 0.371   | -0.4956 | -0.1428 | -0.2313 | -0.2872 | -0.1528 | -0.0658 | -0.0894 | 0.6521  | -0.2067 |
| PY06508 | 0.5731  | 0.4015  | 0.0717  | -0.4439 | -1.3068 | -0.4564 | -0.1091 | -0.8775 | 0.1983  | -0.8672 | -1.1232 | -0.1808 |
| PY04491 | -1.4604 | -0.1824 | -0.0548 | -0.53   | -0.4726 | -0.2467 | -0.1695 | 0.1226  | -0.0247 | 0.0596  | 0.4002  | -0.3276 |
| PY00092 | -0.0544 | 0.1625  | 0.3332  | -0.455  | -0.2501 | -0.2405 | 0.2838  | -0.1008 | 0.2911  | -0.2145 | -0.299  | 0.2844  |
| PY04712 | -0.2824 | -0.1576 | -0.0046 | -0.1121 | -0.1722 | -0.4586 | -0.4401 | -0.1675 | -0.2204 | -0.1202 | 0.0861  | -0.3974 |
| PY02623 | -0.1235 | -0.1123 | 0.2014  | 0.0752  | 0.1893  | 0.1162  | 0.3728  | 0.2186  | 0.3075  | 0.3068  | 0.13    | 0.0094  |
| PY03040 | 0.8241  | 0.4479  | 0.8497  | 0.3943  | -0.2443 | 0.0741  | 0.4276  | -0.2962 | 0.2191  | 0.0394  | -0.4663 | 0.5311  |
| PY01292 | 0.0576  | -0.1556 | 0.0963  | -0.3836 | -0.0055 | 0.0729  | 0.1542  | 0.0555  | -0.0493 | -0.0526 | -0.2527 | -0.005  |
| PY02054 | -0.4355 | -0.0514 | -0.4393 | -0.5926 | -0.6093 | 0.1858  | 0.1492  | 0.0304  | 0.2095  | -1.1446 | -0.0494 | 0.2252  |
| PY01726 | -0.0266 | -0.1476 | 0.1062  | -0.3052 | 0.0769  | -0.1387 | -0.1499 | -0.2801 | -0.1906 | -0.1269 | 0.0267  | -0.027  |
| PY04353 | 0.0034  | -0.3364 | 0.096   | -0.1732 | -0.0998 | 0.0356  | 0.3402  | -0.1023 | 0.262   | 0.4735  | -0.1107 | 0.4084  |
| PY05731 | 0.2024  | 0.0181  | -0.1028 | -0.4531 | 0.1068  | -0.0767 | -0.1627 | -0.2454 | -0.7895 | -1.3021 | -0.2873 | -0.7473 |
| PY02075 | 1.1628  | 0.4225  | -0.5039 | -0.157  | -0.0711 | 0.2225  | 0.4422  | 0.1324  | 0.2271  | -0.2486 | -0.0141 | -0.3367 |
| PY06630 | 0.5689  | 0.4712  | 0.6893  | -0.1356 | 0.128   | -0.2526 | -0.2682 | -0.4552 | -0.3407 | -0.4721 | -0.6001 | -0.4717 |
| PY00199 | -0.8123 | -0.265  | -0.5901 | 0.0526  | 0.9335  | 0.0657  | -0.1798 | 0.2264  | -0.3738 | 0.1558  | 0.0819  | -0.5067 |
| PY02135 | -0.1703 | -0.0555 | 0.0797  | -0.5207 | -0.4666 | -0.0268 | 0.1277  | -0.0669 | 0.0455  | -0.9117 | -0.1562 | -0.0635 |
| PY01883 | 0.3878  | 0.2258  | 0.3226  | -0.3672 | -0.2098 | 0.0124  | 0.0567  | -0.2155 | 0.2088  | -0.5281 | -0.3659 | 0.0254  |
| PY06386 | 0.8918  | 0.5703  | 0.8289  | 0.1911  | -0.3625 | 0.0603  | 0.5907  | -0.1177 | 0.0271  | -0.2766 | -0.2043 | 0.7069  |
| PY03464 | -0.7742 | 0.0813  | 0.2978  | 0.0695  | -0.4056 | -0.2133 | 0.0382  | 0.1583  | 0.0814  | 0.4007  | 0.9881  | 0.0714  |
| PY02315 | -0.4071 | -0.0058 | 0.0463  | 0.0256  | 0.2222  | -0.0852 | 0.1553  | 0.2706  | 0.1967  | -0.1267 | 0.5292  | -0.0036 |
| PY01094 | -0.2973 | -0.6118 | -0.5266 | 0.3198  | 0.4512  | 0.1468  | -0.0978 | 0.2382  | -0.354  | 0.8061  | 0.2974  | -0.0106 |
| PY06306 | 0.0427  | 0.021   | -0.1313 | 0.2268  | -0.1344 | 0.2223  | 0.1091  | -0.0552 | -0.1262 | -0.1376 | -0.3087 | -0.2718 |
| PY02307 | -0.1767 | -0.0233 | -0.0776 | 0.5172  | 0.3095  | 0.0005  | -0.0358 | 0.6182  | 0.0244  | 0.4773  | 0.18    | -0.1186 |
| PY03064 | -0.1388 | 0.0326  | 0.1292  | -0.0706 | -0.3627 | 0.1936  | -0.2383 | -0.1569 | 0.1974  | -0.3217 | -0.3842 | 0.1676  |
| PY07056 | 0.3599  | 0.1191  | -0.2411 | -0.2734 | -0.3626 | -0.3607 | -0.3935 | -0.1932 | 0       | -0.1155 | -0.2127 | -0.3795 |
| PY05088 | 0.0914  | -0.0886 | -0.304  | 0.6986  | 1.0386  | -0.0258 | -0.2395 | -0.0689 | -0.353  | 0.1725  | 0.2352  | -0.0023 |
| PY03623 | 0.9568  | 0.5845  | 0.7444  | 0.0345  | -0.2925 | -0.0866 | 0.1878  | -0.0535 | 0.1954  | 0.5418  | -0.2617 | 0.2664  |
| PY05589 | -0.0694 | 0.1075  | 0.1409  | -0.0241 | -0.0397 | 0.1281  | 0.0409  | 0.0073  | 0.2005  | -0.1341 | 0.5376  | -0.0091 |
| PY02527 | -0.2167 | -0.0141 | -0.0418 | -0.1608 | -0.334  | 0.0451  | 0.0135  | -0.2302 | 0.2158  | -0.0477 | -0.1326 | 0.1193  |
| PY05183 | -0.3462 | -0.2453 | -0.414  | -0.6308 | -0.0568 | -0.1635 | 0.4505  | -0.1828 | 0.2001  | -0.652  | 0.0934  | -0.2097 |
| PY01068 | -0.01   | 0.0895  | 0.1525  | 0.0118  | -0.2563 | 0.1246  | 0.1703  | -0.0546 | 0.0562  | 0.3655  | -0.2254 | -0.0336 |
| PY06669 | -1.1475 | -0.4808 | -0.1289 | -0.6196 | -0.2343 | -0.1842 | 0.0244  | 0.5955  | 0.2192  | 0.2231  | 0.3853  | -0.3348 |
| PY05601 | -0.4162 | -0.0644 | 0.0362  | 0.1648  | 0.4693  | 0.2724  | 0.2049  | 0.2664  | 0.138   | -0.0227 | 0.4499  | -0.028  |
| PY01896 | 0.2997  | 0.1067  | -0.2086 | -0.2548 | -0.2652 | -0.1706 | 0.14    | -0.179  | -0.1531 | 0.0089  | -0.2884 | -0.3    |
| PY06406 | 0.0957  | 0.1792  | 0.3421  | 0.1541  | 0.0875  | 0.2921  | 0.023   | -0.0435 | -0.1213 | -0.018  | -0.256  | -0.1152 |
| PY01358 | 0.1324  | 0.0665  | -0.3236 | 1.8211  | 1.3598  | 0.883   | -0.1382 | 0.6645  | 0.0033  | -0.1996 | 1.3268  | -0.001  |



|         |         |         |         |         |         |         |         |         |         |         |         |         |
|---------|---------|---------|---------|---------|---------|---------|---------|---------|---------|---------|---------|---------|
| PY06703 | 0.3205  | 0.0794  | -0.6125 | -0.7466 | -0.3066 | -0.2384 | -0.1595 | 0.0068  | -0.1394 | -0.1592 | 0.3558  | -0.1449 |
| PY06122 | -0.7064 | -0.3971 | -0.3379 | -0.4987 | -0.3338 | -0.3906 | -0.1872 | 0.3815  | 0.4891  | 0.6735  | 1.0237  | 0.7799  |
| PY00835 | 0.8565  | 0.6111  | 0.3113  | -0.2502 | -0.4213 | 0.228   | 0.5938  | -0.284  | 0.0388  | -0.3105 | -0.1663 | -0.0478 |
| PY06212 | 0.2027  | -0.091  | 0.1008  | -0.0596 | 0.0361  | -0.0983 | 0.1086  | -0.2194 | 0.0857  | -0.0119 | 0.0447  | 0.3156  |
| PY00021 | -0.1662 | -0.0459 | -0.1928 | -0.6242 | -0.097  | 0.2994  | 0.0428  | -0.3831 | -0.1676 | -0.0297 | -0.6505 | -0.8906 |
| PY06316 | -0.6435 | -0.4149 | -0.5537 | -0.5193 | -0.2439 | -0.124  | -0.0268 | 0.1202  | 0.0139  | -0.4068 | 0.0616  | -0.6466 |
| PY01076 | -0.8241 | -0.3645 | -0.3039 | 0.501   | -0.0457 | -0.3746 | -0.2166 | 0.1927  | 0.0013  | 0.4099  | 0.5511  | -0.2404 |
| PY03781 | 1.1184  | 0.638   | -0.5009 | -0.3004 | 0.2371  | -0.3584 | -0.295  | -0.433  | -0.4829 | -0.2336 | -0.3217 | -1.0058 |
| PY03186 | 0.9349  | 0.7252  | 0.9158  | 0.3213  | -0.5987 | 0.5654  | 0.5975  | -0.3034 | 0.1811  | -0.3926 | -1.0565 | 0.3074  |
| PY00535 | -0.1843 | -0.0424 | 0.1413  | 0.0297  | -0.1004 | -0.2502 | 0.0743  | 0.1595  | -0.0663 | -0.1706 | 0.0734  | 0.0094  |
| PY04445 | 0.0008  | -0.1157 | 0.1199  | 0.1318  | 0.171   | -0.261  | -0.2045 | -0.137  | 0.1755  | -0.3854 | -0.0627 | -0.0604 |
| PY00642 | 1.3028  | 0.4606  | -0.2692 | 0.9242  | -0.2229 | -0.3295 | -0.3879 | -0.7141 | -0.3008 | 0.0834  | -0.5819 | -0.7608 |
| PY06416 | -0.4941 | -0.334  | -0.5346 | -0.2068 | 0.2478  | 0.0858  | -0.0981 | -0.0282 | -0.0188 | 0.122   | 0.0055  | 0.1582  |
| PY02714 | 0.4776  | 0.075   | -0.3265 | 0.2691  | -0.5224 | -0.2264 | -0.2884 | 0.0899  | -0.1071 | 0.1702  | -0.082  | 0.0149  |
| PY03900 | 0.6362  | 0.284   | 0.173   | 0.5162  | -0.0635 | -0.1336 | -0.2967 | -0.3652 | -0.2714 | -0.1937 | -0.7392 | -0.0252 |
| PY04929 | 0.0622  | 0.0969  | 0.033   | -0.2985 | -0.5239 | -0.4859 | -0.2457 | -0.0892 | 0.0121  | -0.3433 | 0.022   | -0.3483 |
| PY02963 | 0.007   | -0.0658 | -0.3986 | 0.0821  | 0.2888  | 0.114   | 0.0977  | -0.0126 | -0.2677 | 0.1167  | -0.0656 | 0.1462  |
| PY02512 | -1.2082 | -0.6017 | -0.4505 | -0.6598 | -0.1007 | 0.0477  | -0.5005 | 0.0392  | 0.0131  | 0.3311  | 0.701   | 0.094   |
| PY02251 | -0.2838 | -0.0564 | -0.0409 | -0.4266 | -0.0685 | -0.0608 | 0.1982  | 0.1887  | 0.4183  | -0.4553 | 0.1969  | 0.3029  |
| PY02853 | 0.0831  | 0.121   | -0.0051 | -0.2276 | 0.1962  | 0.0649  | 0.1514  | -0.0302 | 0.3496  | -0.1683 | 0.2638  | 0.5075  |
| PY03842 | -0.4656 | -0.1856 | -0.3678 | -0.3929 | 0.1202  | 0.1465  | 0.2527  | 0.5347  | 0.4481  | 0.7428  | 1.5833  | 0.6295  |
| PY05853 | -0.0131 | -0.184  | -0.2669 | -0.6585 | -0.3395 | -0.2594 | -0.0905 | -0.0026 | 0.0133  | 0.1675  | 0.0027  | -0.0936 |
| PY03907 | 0.1808  | 0.1129  | 0.0257  | 0.2398  | 0.1179  | 0.1177  | 0.2235  | -0.0322 | 0.0573  | 0.0251  | 0.2231  | 0.0146  |
| PY06557 | -0.1011 | 0.1835  | -0.1735 | 0.3942  | 0.1674  | 0.3242  | 0.206   | -0.0293 | 0.2157  | 0.3863  | -0.1994 | 0.3455  |
| PY06943 | 0.199   | -0.0107 | 0.1891  | 0.7925  | 0.2393  | -0.2804 | -0.0141 | 0.1272  | -0.563  | 0.8617  | -0.3061 | 0.101   |
| PY06869 | -0.1776 | -0.2855 | -0.0817 | 0.1967  | 0.218   | 0.18    | 0.2099  | 0.1743  | 0.3321  | 0.1117  | -0.1277 | 0.5571  |
| PY04556 | -0.3652 | -0.5491 | -0.6332 | -0.6374 | -0.0076 | -0.1848 | -0.2278 | 0.1004  | 0.1158  | 0.3283  | 0.5579  | 0.0119  |
| PY05699 | 0.1546  | -0.0436 | -0.1768 | -0.3777 | 0.1969  | 0.0801  | 0.1456  | 0.0005  | 0.016   | -0.3806 | -0.204  | 0.1219  |
| PY01367 | -0.9771 | -0.2786 | -0.1523 | -0.4157 | 0.3136  | 0.4418  | 0.1121  | 0.1811  | -0.0873 | 0.1174  | 0.0594  | -0.1848 |
| PY00663 | 0.2406  | -0.0162 | -0.0951 | -0.1478 | -0.1087 | -0.1136 | 0.0446  | 0.0916  | 0.1741  | 0.274   | -0.1109 | 0.5376  |
| PY02925 | -0.7507 | -0.1438 | 0.2849  | 0.5935  | -0.0098 | 0.1286  | -0.0794 | 0.0315  | 0.0673  | 0.0318  | 0.2545  | -0.4705 |
| PY01364 | 0.2829  | 0.1192  | -0.2701 | -0.4943 | -0.0347 | 0.1371  | -0.1391 | 0.3652  | 0.4561  | 0.5418  | 0.6452  | 0.3701  |
| PY04407 | 0.2314  | 0.1976  | 0.4935  | -0.3106 | -0.1682 | 0.1831  | 0.2475  | -0.146  | -0.0709 | -0.6463 | -0.0671 | 0.0672  |
| PY02528 | -0.4368 | 0.2016  | 0.2197  | -0.8773 | -0.3671 | -0.2993 | -0.238  | -0.1619 | 0.0043  | -0.5801 | 0.2453  | 0.031   |
| PY04033 | 0.0606  | 0.2157  | 0.0651  | -0.9315 | -0.0226 | 0.0622  | 0.0374  | 0.0255  | 0.1437  | -0.7402 | -0.1447 | 0.1682  |
| PY05724 | 0.2809  | 0.0016  | -0.0635 | 0.4753  | 0.1489  | 0.0274  | -0.0862 | 0.2924  | 0.3432  | 0.7855  | 0.6104  | 0.0739  |
| PY01704 | -0.059  | -0.0971 | -0.1452 | -0.3365 | -0.3744 | -0.046  | -0.2668 | -0.285  | -0.0618 | -0.1932 | -0.2253 | 0.0225  |
| PY01495 | 0.0508  | -0.0865 | 0.3053  | -0.1426 | -0.3511 | -0.1093 | 0.2858  | 0.1032  | 0.2711  | -0.0144 | -0.4279 | 0.0236  |
| PY03886 | -0.0739 | -0.4059 | -0.0335 | -0.1764 | 0.0432  | -0.0257 | 0.0256  | -0.1505 | -0.0688 | -0.596  | 0.6687  | 0.029   |
| PY01919 | -0.934  | -0.2617 | 0.1453  | 0.1185  | -0.368  | -0.2821 | 0.0911  | 0.7092  | 0.5355  | -0.1203 | 0.3454  | -0.727  |
| PY02226 | 0.0538  | 0.0235  | -0.0408 | 0.223   | 0.1105  | -0.1527 | -0.1457 | -0.0994 | 0.1011  | 0.11    | 0.0062  | 0.2121  |
| PY01325 | -0.0679 | -0.237  | 0.2331  | -0.5371 | -0.1163 | -0.8424 | -0.7095 | -0.5829 | -0.3501 | -0.253  | -0.1285 | -0.2036 |
| PY01473 | 0.1686  | 0.0398  | -0.1553 | -0.1131 | 0.022   | -0.1686 | -0.0541 | -0.1048 | -0.2372 | 0.003   | 0.1412  | 0.0492  |
| PY01267 | 0.258   | 0.0094  | 0.119   | -0.56   | -0.3571 | -0.0503 | 0.0939  | -0.1697 | 0.0087  | 0.2692  | -0.4007 | 0.2249  |
| PY06552 | 0.2907  | 0.3504  | 0.4574  | -0.1527 | -0.0816 | -0.0484 | 0.0864  | -0.2924 | 0.0626  | 0.2278  | -0.1936 | 0.4223  |
| PY02330 | 0.0725  | 0.2038  | -0.5085 | 0.2307  | -0.1913 | -0.3395 | -0.0618 | 0.3535  | 0.3288  | 0.0465  | 0.1758  | 0.2107  |
| PY01203 | 0.009   | -0.2041 | -0.0114 | 0.1567  | 0.1605  | -0.0423 | 0.048   | 0.1175  | -0.0384 | -0.1487 | 0.1542  | 0.3167  |
| PY01302 | 0.0669  | -0.3987 | -0.0075 | -0.1495 | -0.1741 | 0.1183  | -0.3938 | -0.0422 | -0.1098 | 0.572   | -0.7707 | 0.1925  |
| PY03468 | -0.0209 | 0.2268  | 0.1912  | 0.2824  | 0.3205  | 0.1139  | 0.1226  | 0.1957  | 0.2469  | 0.1956  | 0.8021  | 0.519   |
| PY07016 | 1.3506  | -0.1655 | -0.3597 | 1.1905  | 0.9535  | -0.1529 | 0.0236  | 0.1025  | 0.0138  | 0.469   | 1.9725  | 0.0552  |
| PY00625 | -0.9401 | -0.2519 | -0.1489 | -0.1665 | -0.1566 | -0.5222 | -0.0753 | 0.2792  | 0.0985  | 0.0734  | 0.2538  | -0.2795 |
| PY07471 | -1.081  | -0.4483 | -0.0545 | -0.8405 | -0.7735 | -0.4347 | -0.0394 | 0.2392  | 0.3277  | -0.2818 | 0.4022  | -0.2806 |
| PY01806 | 0.0966  | 0.0284  | 0.0883  | -0.0166 | 0.1162  | -0.0358 | 0.0185  | 0.298   | 0.1337  | 0.2404  | 0.0817  | 0.2622  |
| PY04023 | -0.1587 | 0.1362  | -0.45   | 0.3271  | 0.5436  | -0.2197 | 0.214   | 0.1368  | -0.6724 | 0.2609  | -0.1948 | -0.5282 |
| PY00224 | -0.3059 | -0.0694 | 0.011   | 0.3824  | -0.0958 | -0.2968 | -0.2872 | 0.1621  | 0.1254  | 0.1575  | 0.8792  | -0.0718 |
| PY03628 | -0.4914 | -0.569  | -0.8028 | -0.3232 | -0.3049 | 0.0925  | 0.1135  | 0.172   | 0.1175  | 0.1761  | 0.0214  | 0.0453  |
| PY07448 | 0.9583  | 0.3465  | -0.0377 | -0.0696 | -0.2372 | -0.1395 | 0.0513  | -0.1594 | 0.2511  | -0.1133 | -0.5409 | 0.408   |
| PY03442 | -0.7435 | -0.1239 | 0.277   | -0.7462 | -0.3405 | -0.4965 | -0.3396 | -0.6118 | -0.132  | -0.5272 | -0.632  | -0.3712 |
| PY05472 | -0.983  | -0.3065 | -0.4478 | -0.2556 | -0.2927 | -0.2513 | -0.1025 | 0.0193  | 0.0994  | 0.1505  | 0.3815  | 0.2516  |
| PY04044 | -1.0536 | -0.2142 | 0.3494  | -0.141  | -0.4341 | 0.1116  | -0.0963 | 0.464   | 0.0436  | -0.1438 | 0.4156  | -0.676  |
| PY02646 | -0.3845 | -0.2022 | -0.0692 | -0.287  | -0.3464 | -0.1285 | -0.1979 | 0.0889  | -0.024  | -0.3339 | 0.1359  | -0.0617 |
| PY07648 | 0.5737  | 0.0551  | 0.4414  | 0.5814  | 0.1322  | 0.0718  | 0.3191  | -0.1262 | 0.4292  | 0.1671  | -0.2051 | 0.3968  |
| PY00731 | -0.5052 | -0.5455 | -0.4749 | -0.0983 | 0.4169  | -0.1523 | -0.0867 | 0.1771  | -0.4467 | 0.2194  | 0.3483  | -0.3525 |

|         |         |         |         |         |         |         |         |         |         |         |         |         |
|---------|---------|---------|---------|---------|---------|---------|---------|---------|---------|---------|---------|---------|
| PY01572 | 1.0411  | 0.7941  | 0.7427  | 0.4352  | -0.8329 | -0.0125 | 0.65    | 0.0425  | 0.5972  | 0.5456  | -0.646  | 0.7984  |
| PY07141 | 0.6489  | 0.3792  | 0.1306  | 0.5299  | -0.0823 | 0.3205  | -0.01   | -0.2906 | -0.1008 | -0.4015 | -0.6459 | -0.2242 |
| PY05913 | 0.4074  | 0.2915  | -0.1851 | 0.0679  | 0.1441  | -0.2372 | -0.298  | -0.1665 | -0.4335 | -0.0781 | 0.1274  | 0.0374  |
| PY06116 | -0.3125 | -0.4794 | -0.6709 | -0.3808 | 0.062   | 0.0794  | 0.0492  | 0.0113  | 0.2011  | -0.1461 | 0.6892  | 0.1457  |
| PY00358 | -0.4597 | 0.0536  | 0.1507  | -0.1653 | -0.3609 | 0.1425  | 0.0891  | -0.0801 | 0.2436  | -0.2992 | -0.1375 | -0.1332 |
| PY05599 | 0.3186  | -0.0054 | -0.1396 | -0.0157 | 0.0774  | 0.1864  | 0.2556  | -0.0744 | 0.5333  | 0.4386  | -0.0889 | 0.4481  |
| PY02007 | -1.176  | -0.414  | -0.2062 | -0.5991 | -0.0603 | -0.2453 | -0.0669 | -0.0053 | 0.0983  | -0.1493 | 0.8169  | 0.0358  |
| PY05553 | 0.9033  | 0.6305  | 0.3015  | 0.5612  | -0.2312 | 0.4696  | 0.2156  | -0.006  | 0.0311  | 0.158   | -0.8873 | 0.3652  |
| PY00852 | 0.1576  | -0.1673 | 0.0896  | 0.4551  | 0.1259  | -0.2353 | -0.4415 | -0.0896 | -0.6381 | -0.0031 | 0.3274  | -0.3304 |
| PY03765 | -0.4224 | -0.6746 | -1.1555 | -0.4301 | 0.212   | -0.2732 | -0.4212 | 0.1073  | 0       | -0.4298 | -0.0449 | 0.009   |
| PY02748 | -0.3681 | -0.1135 | -0.1941 | 0.0397  | 0.1936  | -0.1443 | -0.1927 | -0.0032 | -0.7752 | 0.0832  | 0.0977  | -0.7441 |
| PY06589 | -0.1167 | -0.2071 | 0.2516  | -0.1892 | 1.0552  | -0.2977 | -0.0901 | -0.2148 | -0.0069 | -0.6157 | -0.5328 | 0.0978  |
| PY06789 | -0.433  | 0.1163  | 0.2258  | -0.1503 | -0.1193 | -0.3832 | -0.1597 | -0.0279 | 0.1429  | 0.7153  | 0.1411  | -0.2913 |
| PY06980 | -0.2188 | -0.0557 | -0.1859 | 0.7392  | 0.5502  | -0.0019 | -0.2066 | -0.3175 | -0.2449 | 0.4484  | -0.1633 | 0.1412  |
| PY04977 | 0.2661  | 0.3478  | 0.1064  | 0.0245  | -0.075  | -0.094  | -0.3823 | -0.4638 | -0.3949 | -0.2535 | -0.5559 | -0.3633 |
| PY01664 | 0.3732  | 0.1826  | 0.1603  | 0.1074  | -0.1533 | 0.1173  | -0.0168 | -0.2481 | -0.2719 | -0.1352 | -0.5803 | -0.2651 |
| PY01763 | -0.7768 | 0.1904  | 0.1852  | -0.7514 | -0.4175 | -0.1128 | 0.0802  | -0.196  | -0.3021 | -0.2582 | -0.3169 | -0.6771 |
| PY04511 | 0.3097  | 0.0414  | 0.176   | -0.2882 | -0.0269 | -0.2211 | 0.0294  | -0.2877 | -0.0615 | -0.2973 | -0.3003 | -0.046  |
| PY02388 | 0.1974  | 0.0864  | 0.0176  | -0.5727 | -0.5527 | -0.3021 | -0.0363 | 0.0117  | 0.1366  | 0.0877  | -0.1676 | 0.3885  |
| PY06047 | -0.5158 | -0.7282 | -1.3584 | -1.21   | -0.7738 | -0.397  | 0.1598  | 0.1967  | 0.3254  | 0.5583  | 0.8495  | 0.6755  |
| PY03642 | -0.5836 | -0.9168 | -0.8696 | -0.3295 | 0.1447  | 0.1001  | 0.055   | 0.3488  | 0.3093  | 0.112   | -0.0573 | -0.4216 |
| PY06347 | -0.7815 | -0.2853 | 0.4179  | 0.3699  | 0.4227  | 0.3824  | -0.0901 | 0.1971  | 0.2703  | 0.354   | 0.2634  | 0.1099  |
| PY05723 | 0.037   | 0.1473  | 0.0093  | -0.1634 | 0.0053  | -0.261  | -0.1367 | -0.2284 | -0.1581 | 0.0495  | 0.0262  | -0.8593 |
| PY00245 | 0.6145  | 0.0918  | -0.1765 | -0.7297 | -0.0419 | 0.0494  | -0.1585 | -0.4459 | -0.2102 | -0.1884 | -0.5836 | -0.1454 |
| PY05680 | 0.082   | 0.0699  | 0.5044  | -0.002  | 0.1156  | 0.143   | 0.4126  | 0.1263  | 0.2755  | 0.0804  | 0.0771  | 0.1202  |
| PY04504 | -0.3497 | -0.2514 | -0.1337 | 0.0725  | -0.2612 | -0.2852 | -0.0262 | 0.0131  | 0.4342  | 0.2717  | 0.0644  | 0.291   |
| PY05052 | -0.0335 | 0.2619  | -0.0339 | 0.1179  | -0.0018 | -0.2195 | -0.3005 | -0.3387 | -0.1461 | -0.1753 | 0.5037  | -0.0129 |
| PY00008 | 0.1039  | -0.7005 | -0.5606 | 0.2233  | -0.3368 | -0.1224 | -0.6822 | 0.5983  | -0.2437 | 0.9181  | 0.1114  | 0.1866  |
| PY03990 | -0.0624 | -0.0029 | -0.5012 | 0.0583  | 0.1768  | -0.5072 | -0.2116 | -0.0749 | -0.4745 | -0.0807 | -0.0699 | -0.1602 |
| PY05064 | -0.9488 | -0.2169 | 0.1024  | -0.2939 | -0.3065 | 0.1238  | -0.0269 | 0.1858  | 0.0129  | -0.0061 | 0.0998  | -0.3041 |
| PY03942 | -0.7069 | -0.1492 | 0.0232  | -0.5083 | -0.0565 | -0.0176 | 0.0457  | -0.1237 | 0.391   | 0.1087  | 0.4886  | 0.5215  |
| PY04202 | -1.0544 | -0.1176 | -0.1894 | 0.5171  | -0.4607 | -0.5119 | -0.2615 | 0.2017  | 0.202   | 0.2529  | 0.299   | 0.1382  |
| PY04853 | -0.152  | -0.1726 | 0.124   | 0.0371  | 0.2092  | 0.0201  | -0.1462 | 0.0264  | -0.1543 | 0.1598  | 0.2015  | 0.0409  |
| PY02750 | -0.9119 | -0.2664 | 0.1317  | -0.4373 | -0.4232 | -0.5698 | -0.2481 | -0.0475 | -0.0083 | 0.2575  | 0.5366  | 0.3411  |
| PY06008 | 0.46    | 0.0825  | 0.1542  | 0.1523  | 0.0867  | -0.1699 | -0.1799 | -0.2301 | -0.2171 | -0.0402 | -0.3096 | 0.1013  |
| PY03463 | 0.2654  | 0.2486  | -0.0369 | -0.1765 | -0.0496 | 0.1722  | 0.0413  | -0.2744 | 0.0192  | -0.121  | -0.2321 | 0.1343  |
| PY06538 | 0.145   | 0.1209  | 0.2089  | 0.3297  | 0.1906  | 0.4795  | 0.3206  | 0.3851  | 0.0954  | 0.1634  | -0.0887 | 0.0596  |
| PY05976 | -1.0452 | -0.5161 | -0.0101 | -0.0617 | -0.3467 | -0.1575 | -0.2021 | 0.3731  | 0.156   | 0.4126  | 0.5601  | -0.3175 |
| PY06721 | 0.2922  | 0.1181  | 0.0623  | 0.6917  | 0.2036  | 0.0329  | -0.2138 | 0.4043  | 0.0534  | 0.2955  | 0.1572  | -0.1758 |
| PY04548 | 0.1103  | -0.0701 | 0.0542  | -0.0308 | -0.0992 | -0.1142 | -0.0371 | -0.1823 | 0.1283  | -0.1021 | -0.2607 | 0.0856  |
| PY06102 | 0.0601  | -0.3944 | -0.2049 | 0.1348  | -0.0416 | 0.1406  | -0.0659 | 0.0472  | -0.174  | 0.7373  | -0.078  | -0.2402 |
| PY04597 | -0.5452 | -0.3031 | -0.0395 | -0.5611 | -0.1243 | -0.1944 | 0.0571  | 0.0717  | 0.0534  | -0.335  | 0.0346  | -0.149  |
| PY01408 | -0.3059 | -0.2179 | -0.1003 | 0.3331  | 0.2041  | 0.4728  | 0.1087  | 0.114   | -0.0364 | 0.0408  | 0.1787  | -0.0751 |
| PY01352 | 0.4425  | 0.2347  | 0.0074  | -0.1526 | 0.1048  | -0.1682 | 0.104   | -0.1091 | 0.027   | -0.1549 | -0.17   | 0.0872  |
| PY05002 | 0.0039  | -0.2862 | 0.144   | 0.0414  | 0.1528  | 0.0183  | 0.019   | -0.1982 | -0.1011 | 0.4294  | -0.1866 | 0.1019  |
| PY05347 | -0.9885 | -0.5115 | -0.2244 | -0.1542 | -0.0682 | -0.1168 | 0.0472  | 0.2827  | 0.2222  | 0.42    | 0.5163  | -0.7202 |
| PY04670 | 0.2845  | 0.0649  | 0.1612  | -0.3796 | -0.1237 | 0.09    | 0.1173  | -0.0379 | -0.0062 | -0.5288 | -0.3778 | 0.16    |
| PY06000 | 0.58    | 0.3352  | 1.0466  | 0.5623  | -0.2202 | 0.302   | 0.6507  | 0.2371  | 0.5049  | -0.3028 | -0.3302 | 0.2316  |
| PY00872 | 0.0277  | 0.0293  | 0.0756  | 0.337   | 0.488   | 0.4616  | 0.0594  | 0.1129  | -0.2621 | 0.1328  | -0.1484 | 0.2829  |
| PY00332 | -0.5384 | -0.355  | -0.2177 | -0.0336 | -0.0456 | -0.3573 | -0.1247 | 0.037   | -0.0811 | 0.2293  | 0.6043  | 0.1223  |
| PY01435 | -0.5517 | -0.1924 | -0.4267 | -0.0196 | -0.1335 | -0.1924 | -0.2    | 0.2173  | -0.1028 | -0.2964 | -0.0118 | -0.2043 |
| PY06404 | -0.8513 | -0.1593 | -0.1193 | -0.086  | -0.3704 | -0.1952 | 0.0039  | 0.2445  | -0.0232 | -0.132  | 0.596   | -0.1455 |
| PY01524 | -0.2775 | 0.0931  | 0.263   | -0.0378 | 0.2605  | -0.2847 | -0.1291 | -0.2168 | -0.221  | -0.1496 | -0.0872 | 0.0101  |
| PY03109 | -0.825  | -0.4278 | -0.1547 | 0.0491  | -0.4974 | -0.425  | -0.1538 | 0.102   | 0.372   | 0.119   | -0.2376 | 0.0215  |
| PY03118 | -0.3625 | -0.1097 | 0.0837  | -0.3496 | -0.0805 | -0.2029 | -0.165  | -0.3769 | -0.2252 | -0.4263 | -0.057  | 0.023   |
| PY01679 | -1.0164 | -1.0331 | -0.6293 | 0.1096  | -0.0383 | -0.0724 | -0.1403 | 0.0632  | 0.0788  | 0.1929  | 0.2754  | 0.1793  |
| PY00909 | -1.0085 | -0.2499 | -0.3228 | -0.6137 | -0.7206 | -0.7312 | 0.1563  | 0.616   | 0.5464  | 0.7293  | 1.1763  | 0.4122  |
| PY00179 | -0.6872 | -0.0635 | -0.1443 | 0.6416  | -0.3662 | 0.0215  | 0.3248  | 0.2116  | 0.4996  | 0.6751  | 0.4266  | 0.3962  |
| PY05801 | 0.4674  | 0.0436  | 0.1542  | 0.4112  | 0.3885  | 0.2404  | -0.2041 | 0.0255  | -0.0045 | -0.0939 | -0.1056 | -0.0805 |
| PY06623 | 0.0244  | -0.1984 | 0.1076  | 0.2984  | -0.1273 | -0.3145 | -0.2199 | 0.2654  | 0.0116  | 0.371   | 0.2881  | 0.2773  |
| PY03926 | 1.1634  | 0.7807  | 0.9876  | 0.01    | -0.5026 | -0.3653 | 0.4216  | -0.2166 | 0.3492  | 0.0504  | -0.8991 | 0.7427  |
| PY07076 | 0.252   | 0.3332  | 0.3428  | 0.5636  | -0.1153 | -0.2349 | -0.0864 | -0.3401 | 0.0281  | -0.3286 | -0.4411 | 0.0525  |
| PY00108 | -0.1907 | 0.3817  | 0.3286  | 0.0266  | -0.5135 | -0.4243 | -0.1483 | -0.452  | -0.1675 | -0.0336 | 0.0864  | -0.3145 |

|         |         |         |         |         |         |         |         |         |         |         |         |         |
|---------|---------|---------|---------|---------|---------|---------|---------|---------|---------|---------|---------|---------|
| PY04080 | 0.1918  | 0.2096  | -0.0468 | 0.1052  | -0.1784 | 0.3551  | 0.609   | 0.8134  | 0.145   | 0.4687  | -0.0509 | 0.3515  |
| PY05265 | -0.0373 | 0.0084  | -0.1763 | 0.3337  | 0.1445  | -0.144  | 0.0725  | -0.1806 | 0.0599  | -0.0488 | 0.4001  | 0.1475  |
| PY06906 | -0.0806 | -0.1138 | 0.447   | 0.1445  | 0.0598  | 0.4183  | 0.4973  | 0.0004  | -0.4701 | -0.1637 | -0.0329 | -0.106  |
| PY01785 | 0.0072  | -0.103  | -0.5175 | -0.0799 | 0.3558  | -0.0635 | -0.3189 | -0.1048 | -0.1686 | 0.1037  | -0.0365 | -0.053  |
| PY06950 | -0.431  | -0.3319 | -0.5188 | -0.1916 | -0.028  | -0.2601 | -0.2713 | 0.0371  | -0.1499 | -0.0027 | -0.1481 | -0.1773 |
| PY00081 | -0.81   | -0.2494 | -0.0838 | 0.3791  | -0.1436 | 0.0654  | -0.0396 | 0.3982  | -0.415  | 0.2865  | 0.4877  | -0.3742 |
| PY00010 | -0.527  | -0.2333 | -0.1789 | -0.0264 | -0.0639 | -0.1814 | -0.1512 | 0.0876  | 0.0759  | 0.0454  | 0.3836  | -0.147  |
| PY06103 | -0.271  | 0.4604  | 0.0074  | -0.2347 | -0.7982 | -0.1046 | 0.36    | 0.1262  | 0.3002  | -0.4776 | -0.0593 | 0.0519  |
| PY02076 | -0.6999 | -0.1162 | -0.6803 | -0.122  | -0.2303 | -0.1707 | -0.1993 | -0.0825 | 0.1755  | 0.0291  | 0.0102  | -0.1461 |
| PY01801 | 0.2833  | 0.0731  | -0.0963 | 1.3673  | 0.8339  | 0.1179  | -0.2488 | 1.0857  | -0.3165 | 0.8257  | 0.632   | -0.2103 |
| PY02064 | 0.0144  | -0.1597 | -0.2346 | 0.0549  | 0.1873  | 0.3716  | 0.0311  | 0.3413  | 0.2471  | 0.3518  | 0.4042  | 0.1412  |
| PY00403 | -0.612  | -0.4303 | -0.1757 | -0.7965 | -0.5607 | -0.1465 | -0.6968 | -0.0444 | 0.3413  | 0.0575  | -0.1511 | 0.4041  |
| PY05908 | 0.2248  | 0.1161  | -0.2744 | 0.42    | -0.0168 | 0.1655  | -0.0716 | 0.3071  | -0.2668 | 0.0624  | -0.0082 | -0.0225 |
| PY02215 | -0.0233 | -0.0612 | -0.0928 | 0.9047  | 1.7595  | 0.303   | -0.0325 | -0.3508 | -0.2758 | -0.3501 | 2.0614  | -0.3214 |
| PY06183 | -1.4767 | -1.61   | -1.4089 | -0.4505 | -0.0159 | 0.1666  | -0.0316 | 0.1869  | 0.1325  | -0.0861 | 0.6221  | -0.2995 |
| PY06099 | -1.3771 | -0.0306 | 0.276   | -1.018  | 0.1913  | 0.1331  | -0.0241 | 0.0774  | -0.1027 | -0.5645 | 0.2373  | -0.7939 |
| PY01791 | -0.0529 | 0.0735  | -0.1403 | -0.2329 | 0.4627  | 0.0492  | -0.3255 | 0.0299  | -0.2073 | 0.0898  | 0.0272  | -0.0205 |
| PY00267 | -1.0008 | -0.377  | -0.0568 | -0.2086 | 0.033   | -0.1111 | -0.273  | 0.1179  | -0.1924 | 0.1674  | 0.3417  | -0.2693 |
| PY05509 | 0.6855  | -0.0183 | 0.3784  | -0.3736 | -0.1495 | -0.3454 | 0.1394  | -0.2981 | 0.4346  | -0.0437 | 0.0004  | 0.541   |
| PY05095 | -0.0602 | 0.0971  | 0.0669  | -0.148  | -0.5479 | -0.2421 | 0.005   | -0.0916 | -0.0776 | -0.1829 | 0.178   | -0.0087 |
| PY04338 | 0.1273  | -0.2749 | -0.0166 | 0.0295  | 0.071   | -0.0379 | -0.0597 | -0.6301 | -0.0337 | -0.2603 | -0.4094 | 0.0053  |
| PY07165 | 0.6722  | 0.4366  | 0.783   | 0.4078  | -0.3689 | -0.1397 | -0.0463 | -0.2724 | -0.0119 | -0.2876 | -0.6548 | -0.0299 |
| PY03885 | -0.1083 | -0.1689 | -0.2033 | 0.3575  | 0.5225  | -0.1239 | -0.4893 | 0.0702  | -0.1007 | 0.2489  | 0.3906  | -0.2055 |
| PY00649 | -0.1898 | 0.1142  | 0.0563  | 0.1546  | -0.6462 | -0.1764 | -0.1108 | 0.008   | 0.5365  | -0.5074 | -0.2366 | 0.2092  |
| PY04225 | -0.1872 | -0.0584 | -0.0091 | 1.2631  | 0.1673  | -0.0443 | 0.046   | 0.0362  | 0.0828  | 0.1169  | 0.1384  | 0.0509  |
| PY00567 | -0.9916 | -0.1794 | -0.1545 | -0.0156 | 0.2015  | -0.1479 | -0.3087 | 0.0798  | -0.0837 | 0.1207  | 0.5415  | -0.2947 |
| PY06671 | -1.3035 | -0.415  | 0.0152  | -0.1778 | -0.5715 | -0.6163 | 0.0445  | 0.1871  | 0.2351  | -0.7754 | 0.4857  | -0.2959 |
| PY01988 | -0.1078 | -0.2519 | -0.4241 | -0.1786 | 0.0059  | 0.0426  | -0.0315 | 0.0586  | -0.3105 | 0.3732  | -0.1582 | -0.3225 |
| PY00726 | 0.0013  | -0.2367 | -0.4051 | 0.259   | 0.6083  | -0.2068 | -0.2839 | -0.4128 | -0.3352 | -0.5412 | -0.1588 | -0.0557 |
| PY02985 | -0.3866 | 0.1573  | -0.7289 | -0.6111 | -0.0561 | -0.177  | -0.1655 | 0.1612  | 0.2242  | 0.1743  | 0.4425  | -0.2416 |
| PY01564 | -0.0953 | 0.0577  | -0.3317 | -0.1125 | -0.0053 | -0.52   | -0.5864 | 0.0271  | -0.0416 | -0.2323 | 0.4094  | -0.3512 |
| PY02090 | -0.5146 | -0.0088 | -0.0731 | -0.4627 | 0.1309  | -0.2075 | -0.2924 | -0.1497 | -0.0322 | 0.1145  | 0.41    | -0.2091 |
| PY01428 | 0.0398  | 0.1722  | 0.0162  | 0.4374  | 0.6966  | 0.1948  | 0.1239  | -0.0606 | -0.1352 | 0.138   | 0.0627  | 0.1164  |
| PY00406 | 0.0865  | -0.2836 | -0.0513 | -0.3048 | -0.508  | 0.1481  | 0.2187  | 0.3477  | 0.1569  | 0.3675  | -0.2846 | 0.7677  |
| PY02791 | -0.8817 | -0.2305 | -0.1066 | -0.0983 | -0.6061 | -0.4954 | -0.0691 | 0.1976  | -0.0537 | 0.0151  | 0.2058  | 0.0375  |
| PY02947 | -0.322  | -0.187  | 0.0612  | -0.5403 | -0.1373 | -0.0504 | -0.1694 | -0.2246 | 0.3265  | -0.1336 | -0.3154 | 0.2591  |
| PY06976 | -0.8661 | -0.2764 | -0.2323 | -0.8458 | -0.3825 | -0.0406 | 0.2176  | 0.7958  | 0.3909  | -0.0199 | 0.9403  | -0.2918 |
| PY04726 | -0.8264 | -0.2738 | -0.2157 | -0.0231 | 0.0244  | 0.0337  | 0.2859  | 0.3098  | 0.1748  | -0.1455 | 0.0591  | -0.1683 |
| PY06192 | -0.3942 | -0.094  | -0.238  | -0.1117 | -0.5221 | -0.4318 | -0.2393 | 0.165   | 0.4089  | 0.5172  | 0.5696  | 0.3279  |
| PY05226 | 0.6134  | 0.2032  | 0.5653  | 0.2343  | -0.19   | 0.1418  | 0.2682  | -0.2838 | -0.0313 | -0.4271 | -0.5022 | -0.1097 |
| PY04954 | 0.3504  | 0.0609  | 0.1822  | 0.2125  | 0.1548  | 0.0039  | 0.437   | 0.0047  | -0.4692 | 0.2676  | -0.3443 | 0.4044  |
| PY03104 | -0.8263 | -0.0529 | -0.0542 | -0.1887 | -0.2324 | 0.0226  | 0.0259  | -0.0381 | -0.0329 | 0.0832  | 0.1352  | -0.0432 |
| PY00790 | 0.1173  | 0.1931  | 0.0056  | 0.1382  | -0.042  | -0.0227 | 0.0886  | -0.0629 | 0.1289  | 0.254   | 0.0008  | 0.1745  |
| PY02835 | -0.0524 | -0.0401 | 0.0877  | 1.5663  | 1.3419  | 1.5476  | 0.1216  | 1.1531  | -0.2769 | 0.9404  | 1.2715  | 0.098   |
| PY05155 | -0.2835 | 0.0031  | -0.0784 | 0.3974  | -0.2602 | 0.0452  | 0.0152  | 0.5197  | 0.0984  | -0.0822 | 0.0981  | 0.0223  |
| PY03544 | 0.3728  | 0.2437  | 0.1913  | -0.1395 | 0.0169  | 0.1315  | -0.1204 | -0.1922 | -0.1134 | -0.0953 | -0.222  | 0.0236  |
| PY00343 | 0.292   | -0.0505 | 0.1686  | 0.4428  | 0.1192  | 0.0062  | -0.1792 | -0.0052 | -0.2846 | 0.1556  | -0.2322 | -0.235  |
| PY03075 | -0.2011 | 0.0049  | -0.2037 | 0.3491  | 0.0913  | -0.3144 | -0.1046 | 0.2621  | 0.1905  | -0.4574 | 0.3547  | 0.1115  |
| PY02618 | 0.4403  | 0.2378  | -0.1024 | -0.1059 | -0.1697 | 0.1159  | -0.0201 | -0.0004 | 0.1909  | 0.1521  | -0.3395 | 0.1491  |
| PY05715 | -0.5084 | 0.0066  | 0.3076  | 0.14    | 0.1225  | -0.1169 | -0.0283 | -0.0981 | 0.1722  | 0.1549  | 0.3299  | -0.0367 |
| PY00543 | -0.9816 | -0.2462 | 0.2459  | -0.4426 | -0.619  | 0.0201  | 0.1438  | 0.045   | -0.0225 | -0.0365 | 0.2153  | -0.2853 |
| PY07137 | -0.2883 | 0.2433  | 0.1737  | 0.3564  | 0.2139  | 0.0438  | 0.0261  | 0.0009  | -0.3827 | 0.1812  | 0.4435  | 0.1883  |
| PY00142 | 0.8644  | 0.3763  | 0.552   | -0.0723 | -0.424  | -0.0321 | -0.0276 | -0.408  | -0.1135 | -0.4431 | -0.7564 | 0.4739  |
| PY05833 | -0.3623 | -0.1687 | -0.2267 | -1.2157 | 0.019   | -0.4155 | -0.046  | -0.2623 | -0.4307 | -0.1471 | -0.2171 | -0.1274 |
| PY07308 | -0.3334 | 0.0808  | -0.2744 | -0.4977 | -0.2584 | -0.0678 | -0.1022 | -0.1633 | -0.1915 | -0.3799 | -0.0194 | -0.4113 |
| PY02594 | 0.5369  | 0.2535  | -0.1317 | 0.1965  | 0.6125  | 0.2     | 0.1564  | 0.2758  | -0.0188 | 0.2726  | 0.4199  | 0.1813  |
| PY05766 | -0.0258 | 0.0778  | 0.1302  | -1.0513 | -0.3467 | -0.3659 | -0.556  | -0.8935 | -0.3589 | -0.7442 | -0.47   | -0.0763 |
| PY07113 | 0.1781  | 0.2247  | 0.4646  | 0.0869  | -0.3618 | -0.0477 | 0.5385  | 0.1252  | 0.4604  | 0.0261  | -0.7262 | -0.0602 |
| PY01558 | 0.6196  | 0.2564  | 0.6662  | -0.334  | -0.0601 | -0.0031 | -0.0085 | -0.3249 | 0.0359  | -0.1444 | -0.2439 | 0.2552  |
| PY01193 | -0.8401 | -0.2938 | 0.0134  | -0.6826 | -0.0218 | 0.0028  | -0.1587 | -0.1381 | -0.1659 | -0.4117 | -0.0807 | -0.2852 |
| PY00973 | -0.5196 | -0.2041 | 0.0956  | 0.214   | -0.1021 | 0.0295  | -0.2062 | -0.1726 | -0.3227 | -0.0681 | -0.0746 | -0.5385 |
| PY01777 | -0.3218 | -0.0165 | -0.1187 | -0.393  | -0.0989 | 0.0011  | 0.054   | 0.2214  | 0.1794  | 0.1062  | 0.3574  | -0.2079 |
| PY00292 | -0.7043 | -0.3895 | -1.2305 | -0.1542 | -0.3021 | 0.14    | 0.1951  | 0.6184  | 0.1186  | 0.2703  | 0.159   | -0.4287 |

|         |         |         |         |         |         |         |         |         |         |         |         |         |
|---------|---------|---------|---------|---------|---------|---------|---------|---------|---------|---------|---------|---------|
| PY03454 | -0.0503 | 0.0887  | 0.1785  | 0.1282  | 0.2588  | 0.0863  | -0.1602 | -0.1583 | -0.2135 | -0.477  | -0.0067 | -0.3896 |
| PY04948 | -0.0772 | -0.0641 | 0.0321  | -0.2329 | 0.1181  | -0.0738 | 0.1384  | 0.2722  | 0.1963  | -0.2404 | 0.376   | -0.0009 |
| PY03274 | 0.2845  | 0.0859  | 0.1455  | -0.5139 | -0.0002 | 0.0573  | 0.092   | -0.1443 | 0.1004  | -0.2607 | -0.1996 | 0.2308  |
| PY05382 | -0.9076 | -0.2424 | -0.3261 | -0.3394 | -0.2635 | -0.3665 | -0.1107 | 0.2158  | 0.1293  | -0.0861 | 0.3615  | -0.5524 |
| PY01509 | 0.0016  | 0.5214  | 0.3191  | -0.2077 | -0.0964 | 0.4983  | 0.1335  | -0.0319 | 0.0063  | -0.7615 | -0.3146 | -0.0048 |
| PY05607 | 0.1088  | 0.2106  | 0.2247  | -0.2848 | -0.5822 | -0.0069 | 0.1523  | 0.0122  | 0.1906  | -0.1897 | -0.3611 | 0.0477  |
| PY07004 | 0.6535  | 0.4424  | -0.2358 | -0.4667 | 0.0464  | -0.0855 | 0.0254  | -0.6073 | -0.3567 | -0.444  | -0.5747 | -0.1669 |
| PY04705 | 0.0219  | -0.1883 | -0.4787 | -0.2723 | 0.2018  | -0.3438 | -0.3356 | -0.192  | -0.2767 | 0.0353  | -0.065  | 0.1097  |
| PY05139 | -0.2983 | -0.3208 | -0.5238 | 0.9321  | 0.1439  | 0.5738  | -0.0414 | 0.6323  | 0.0508  | 0.9112  | 1.4952  | -0.0214 |
| PY03562 | -0.511  | -0.1864 | -0.168  | 0.1782  | 0.4061  | 0.0232  | -0.2081 | 0.1185  | -0.2186 | -0.1383 | 0.4667  | -0.0957 |
| PY03311 | 0.8575  | 0.2849  | -0.0374 | 0.8722  | -0.098  | 0.0533  | 0.1492  | 0.0196  | 0.0619  | -0.5961 | -0.3407 | 0.1277  |
| PY01084 | -0.1434 | 0.0899  | -0.0378 | -0.5546 | -0.5114 | -0.3228 | 0.1229  | -0.4159 | 0.0676  | -0.0106 | -0.4994 | 0.1531  |
| PY03866 | 0.0127  | 0.1371  | -0.4864 | -0.3183 | -0.1128 | -0.457  | -0.4086 | 0.1659  | -0.1709 | 0.2445  | 0.116   | -0.2001 |
| PY05364 | -0.0577 | 0.1109  | 0.3603  | 0.2305  | -0.3205 | -0.052  | 0.0984  | 0.1201  | 0.0707  | 0.137   | -0.4994 | 0.0797  |
| PY04402 | 0.784   | 0.2969  | 0.4267  | 0.4206  | -0.0047 | -0.0159 | 0.2491  | -0.2121 | -0.152  | 0.1893  | -0.4156 | 0.3655  |
| PY06457 | -0.4048 | 0.2161  | 0.0065  | -1.2568 | -0.9072 | -0.3233 | -0.7155 | -0.1172 | 0.1295  | -0.3951 | 0.3091  | 0.0465  |
| PY03684 | -0.4136 | -0.1242 | -0.1867 | -0.1853 | 0.2858  | 0.3344  | 0.0907  | 0.067   | 0.0447  | -0.5782 | -0.0552 | 0.1067  |
| PY07179 | 0.1281  | 0.0055  | 0.0337  | -0.3034 | -0.244  | 0.1031  | 0.0885  | -0.1683 | 0.1769  | -0.1072 | -0.3433 | 0.181   |
| PY06872 | 0.2568  | -0.0402 | 0.007   | 0.3282  | 0.2744  | -0.1705 | -0.2626 | -0.2709 | -0.3282 | -0.2053 | -0.0482 | -0.1205 |
| PY00893 | -0.0449 | 0.1031  | -0.0225 | 0.2569  | -0.0764 | -0.024  | -0.035  | -0.0468 | 0.0726  | -0.3235 | -0.2308 | 0.3234  |
| PY05479 | 0.1612  | 0.119   | 0.1275  | 0.0943  | 0.2006  | 0.0011  | -0.0383 | 0.2423  | 0.2028  | 0.0008  | 0.5663  | 0.2431  |
| PY05253 | -0.0537 | -0.0314 | 0.1704  | 0.0685  | -0.0989 | 0.0498  | 0.0819  | -0.0834 | 0.0485  | 0.0916  | -0.0448 | 0.143   |
| PY01137 | -0.2807 | -0.0021 | -0.453  | 1.4248  | 0.6804  | -0.0589 | -0.1295 | 0.1863  | -0.0185 | 1.3167  | 0.5236  | 0.3114  |
| PY01855 | -0.1028 | -0.0143 | -0.0094 | 0.1779  | -0.1027 | 0.2636  | 0.2168  | 0.5813  | 0.0947  | -0.1507 | -0.1437 | -0.006  |
| PY01538 | -0.4936 | -0.2546 | 0.2058  | -0.3097 | -0.2323 | 0.0493  | 0.0897  | -0.3361 | 0.0121  | -0.3096 | 0.1591  | 0.2418  |
| PY04392 | 0.0373  | 0.1696  | 0.389   | 0.0504  | 0.1499  | 0.0187  | 0.0239  | -0.1254 | -0.036  | 0.2113  | 0.1484  | 0.0365  |
| PY03344 | -0.0991 | -0.211  | -0.2874 | 0.0279  | 0.251   | 0.0536  | -0.1782 | 0.2989  | 0.0244  | 0.1762  | 0.2403  | 0.0436  |
| PY02867 | -0.1971 | 0.489   | -0.3572 | -0.3242 | 0.2973  | -0.1087 | -0.0526 | 0.0357  | -0.1385 | -0.1768 | 0.0277  | -0.6554 |
| PY04269 | 0.4359  | 0.2012  | -0.133  | -0.7205 | -0.2073 | -0.2497 | -0.0159 | -0.4304 | -0.1371 | -0.403  | -0.5777 | -0.0632 |
| PY01619 | -0.253  | -0.3256 | -0.1511 | -0.4974 | -0.6307 | -0.1503 | -0.1799 | -0.1045 | 0.2976  | -0.003  | 0.8336  | 0.427   |
| PY04342 | 0.3318  | 0.5073  | 0.7591  | -0.1277 | -0.1334 | 0.0886  | 0.2265  | 0.0018  | 0.2065  | -0.2413 | -0.2592 | -0.1917 |
| PY06034 | 0.1354  | 0.132   | 0.4696  | -0.5288 | -0.5894 | 0.0227  | -0.0851 | -0.2092 | 0.0439  | -0.4248 | -0.2513 | -0.0657 |
| PY00710 | -0.4723 | -0.1859 | -0.2071 | -0.3627 | 0.007   | -0.2859 | -0.5154 | -0.094  | -0.1601 | -0.1978 | 0.3567  | -0.3949 |
| PY04046 | 0.6029  | 0.2058  | 0.1735  | 0.6241  | 0.2864  | -0.0583 | -0.1078 | -0.1219 | -0.1957 | -0.1588 | -0.0977 | 0.1137  |
| PY03604 | 0.4109  | 0.24    | -0.1341 | -0.1006 | -0.1265 | -0.3709 | -0.3316 | 0.0289  | 0.0413  | -0.4376 | -0.2854 | -0.2244 |
| PY06738 | -0.0278 | -0.0821 | 0.3524  | 0.1027  | 0.2688  | 0.1263  | 0.1809  | -0.1787 | 0.1141  | -0.1453 | -0.2049 | 0.2477  |
| PY00481 | 0.5888  | 0.2061  | -0.3543 | -0.2189 | -0.1232 | -0.1373 | -0.3322 | -0.4255 | -0.3421 | -0.2299 | -0.2787 | -0.197  |
| PY02839 | 0.4178  | -0.0237 | -0.4012 | -0.0225 | 0.0259  | -0.0685 | 0.1868  | -0.1786 | -0.2422 | -0.4513 | -0.5382 | -0.0235 |
| PY00365 | 0.3286  | 0.0939  | 0.0965  | 0.5592  | -0.1648 | 0.0093  | -0.1128 | 0.0588  | -0.1694 | -0.0605 | 0.0266  | -0.0115 |
| PY00584 | 0.2751  | 0.1465  | -0.2565 | 0.4875  | -0.3006 | 0.0092  | -0.131  | 0.1353  | -0.4963 | -0.1573 | -0.2835 | -0.2662 |
| PY03352 | -0.0552 | 0.4188  | 0.9209  | 0.3973  | -0.3194 | -0.1894 | 0.207   | -0.1184 | 0.094   | 0.0172  | -0.2446 | 0.0461  |
| PY00384 | -0.4664 | 0.0874  | -0.2916 | 0.119   | 0.0092  | 0.0569  | -0.0383 | -0.0401 | 0.0826  | 0.7353  | -0.0054 | -0.1831 |
| PY06829 | -0.6985 | -0.5127 | -0.242  | -0.4886 | -0.282  | -0.0748 | 0.1602  | 0.0406  | 0.3527  | -0.0981 | 0.1666  | -0.1637 |
| PY03279 | 0.1598  | 0.0824  | -0.1162 | -0.0989 | 0.1004  | 0.2748  | 0.1858  | -0.04   | -0.0153 | -0.1696 | 0.2538  | 0.1811  |
| PY01629 | -0.4234 | -0.1259 | -0.1711 | 0.0448  | -0.2718 | -0.1917 | -0.2436 | 0.0671  | -0.2231 | 0.0513  | 0.1627  | -0.3806 |
| PY01716 | -0.9773 | -0.1802 | -0.4201 | 0.6649  | -0.6571 | -0.343  | 0.139   | 0.8491  | 0.7759  | -0.1451 | 0.3815  | 0.8513  |
| PY01730 | 0.2356  | -0.1346 | -0.1504 | -0.0121 | -0.0702 | 0.3733  | 0.3049  | 0.086   | 0.2847  | 0.3695  | -0.7213 | 0.31    |
| PY01949 | -0.4314 | -0.2268 | -0.2171 | 0.1182  | -0.3372 | 0.2617  | 0.0607  | 0.3886  | 0.5032  | 0.1671  | -0.1383 | -0.1196 |
| PY01150 | -0.1885 | -0.2721 | -0.1388 | 0.7272  | 0.746   | 0.0771  | -0.1855 | -0.1876 | -0.5357 | 0.7726  | 0.5739  | -0.0129 |
| PY01912 | -0.6176 | -0.2886 | 0.1394  | -0.2234 | 0.0718  | 0.4654  | 0       | -0.2    | -0.344  | -0.0609 | 0.1069  | -0.1824 |
| PY01719 | -0.6188 | -0.3932 | -0.5103 | -0.7861 | 0.0644  | 0.3508  | 0.2015  | 0.2496  | 0.1357  | -0.2886 | 0.0774  | -0.1646 |
| PY00505 | -0.603  | -0.0479 | 0.2495  | -0.2906 | 0.0202  | 0.3824  | 0.19    | 0.1259  | 0.0055  | 0.3719  | 0.6636  | 0.2047  |
| PY00601 | -0.0299 | 0.2496  | 0.3904  | -0.2752 | -0.2125 | 0.205   | 0.1786  | 0.1119  | 0.1787  | 0.0411  | -0.107  | 0.0353  |
| PY02590 | 0.3475  | 0.1181  | 0.3736  | 0.2218  | 0.3653  | 0.4848  | 0.123   | 0.0073  | -0.0735 | -0.3316 | 0.4519  | -0.1187 |
| PY04618 | 0.0088  | 0.0985  | -0.1027 | -0.187  | -0.3009 | -0.2922 | -0.47   | -0.1001 | -0.1956 | -0.1161 | -0.5538 | -0.319  |
| PY02341 | -0.2268 | -0.2458 | -0.2682 | -0.0689 | -0.0823 | -0.1387 | 0.0814  | 0.1366  | 0.3038  | 0.219   | 0.1196  | 0.1468  |
| PY05445 | -0.1675 | -0.1261 | 0.066   | -0.1039 | 0.1361  | -0.134  | -0.037  | -0.2281 | -0.242  | -0.41   | -0.1713 | 0.183   |
| PY07357 | 0.0131  | 0.1016  | -0.2663 | 0.1845  | -0.1023 | -0.2136 | -0.4293 | -0.1775 | -0.2348 | -0.0985 | -0.2391 | -0.4931 |
| PY01793 | -0.3606 | -0.2674 | 0.0141  | -0.3786 | -0.2971 | -0.3622 | -0.29   | 0.0251  | 0.0121  | -0.1496 | 0.3282  | -0.0572 |
| PY05203 | 0.1197  | 0.0649  | 0.1209  | 0.4939  | 0.1268  | -0.0394 | -0.1609 | 0.2018  | -0.5903 | -0.0079 | -0.3075 | 0.1732  |
| PY02381 | -0.2026 | -0.1122 | -0.1175 | 0.0725  | 0.1066  | -0.1664 | -0.2166 | 0.0334  | -0.1165 | -0.1911 | 0.1701  | 0.0253  |
| PY03735 | 0.5837  | 0.1888  | -0.0046 | 0.2668  | 0.2198  | -0.4214 | -0.4448 | -0.4679 | -0.3433 | -0.3566 | -0.0155 | -0.2647 |
| PY00164 | 0.1482  | 0.1231  | -0.1389 | 0.0829  | -0.0406 | 0.3175  | 0.1558  | -0.3574 | -0.0655 | -0.1316 | -0.1624 | 0.4344  |

|         |         |         |         |         |         |         |         |         |         |         |         |         |
|---------|---------|---------|---------|---------|---------|---------|---------|---------|---------|---------|---------|---------|
| PY02465 | -0.1132 | 0.0548  | -0.4243 | -0.4503 | 0.025   | 0.0514  | 0.7044  | 0.0193  | 0.2645  | -0.3624 | -0.2079 | -0.3816 |
| PY06998 | -0.7679 | -0.218  | -0.0913 | -0.7399 | -0.1615 | -0.0891 | -0.064  | -0.0349 | 0.0241  | -0.4008 | -0.0199 | -0.0824 |
| PY02493 | 0.3231  | 0.0371  | -0.0205 | -0.4321 | -0.1843 | -0.2918 | 0.1065  | -0.099  | 0.2064  | 0.1187  | 0.1245  | 0.4092  |
| PY00706 | -0.2095 | -0.2911 | -0.4043 | 0.5371  | 0.5462  | 0.1593  | -0.3639 | 0.2632  | -0.6286 | 0.4021  | 0.5263  | -0.33   |
| PY00638 | 0.0883  | 0.3882  | 0.7126  | -0.0675 | -0.2773 | 0.3682  | 0.075   | -0.0659 | 0.2454  | 0.1658  | 0.7344  | -0.1795 |
| PY01605 | 0.0988  | 0.12    | 0.3138  | -0.197  | -0.0562 | 0.0389  | -0.0191 | -0.2316 | -0.0635 | -0.1729 | -0.2415 | -0.1681 |
| PY01134 | -0.1422 | -0.155  | 0.0039  | 0.1938  | 0.3042  | 0.1178  | 0.0129  | 0.1068  | -0.0138 | 0.0913  | 0.2275  | -0.0947 |
| PY00950 | -0.526  | -0.2394 | -0.3417 | -0.1821 | -0.092  | -0.2433 | -0.1587 | -0.1431 | -0.7256 | 0.0334  | 0.2448  | -0.3147 |
| PY04904 | -0.1405 | 0.0038  | 0.3017  | -0.2779 | -0.2875 | 0.1171  | 0.1054  | 0.1296  | 0.0861  | -0.1403 | -0.1055 | 0.0947  |
| PY07185 | -0.2092 | -0.2506 | -0.0543 | -0.4577 | -0.0953 | -0.2108 | -0.1642 | -0.2378 | 0.1472  | -0.2525 | 0.0991  | 0.1122  |
| PY07630 | -0.3158 | -0.34   | -0.3475 | 0.2982  | -0.0074 | -0.1164 | -0.3024 | -0.15   | -0.1677 | -0.3126 | -0.0936 | -0.0051 |
| PY04455 | 0.1146  | 0.2728  | 0.1806  | 0.1247  | -0.2324 | -0.3916 | -0.3154 | 0.0279  | -0.0282 | 0.3355  | 0.9746  | 0.1165  |
| PY00078 | -0.0586 | -0.5856 | -0.3622 | 0.1608  | -0.0144 | -0.0097 | -0.1976 | -0.0815 | -0.4131 | -0.1585 | -0.0652 | -0.4283 |
| PY03635 | 0.3151  | -0.1718 | -0.2613 | -0.0561 | 1.5975  | 0.0368  | -0.2567 | -0.2326 | -0.3462 | 0.0058  | -0.208  | -0.34   |
| PY05900 | -0.4882 | -0.0995 | 0.3024  | 0.3695  | 0.0015  | 0.1351  | -0.0041 | 0.0861  | -0.0556 | 0.4703  | 0.6714  | 0.0179  |
| PY06176 | -1.1356 | 0.13    | 0.3554  | -0.804  | 0.1187  | -0.0179 | -0.1326 | -0.3036 | -0.2341 | -0.2694 | 0.5026  | -0.4561 |
| PY06422 | -0.1092 | -0.0623 | 0.281   | -0.3918 | -0.3539 | 0.2902  | 0.6001  | 0.3177  | 0.5757  | -0.1344 | -0.372  | 0.3171  |
| PY04917 | -0.2193 | 0.1025  | 0.4809  | -0.4634 | -0.2645 | 0.1743  | 0.1171  | -0.2223 | 0.1564  | -0.4163 | -0.0281 | 0.2646  |
| PY05558 | -0.0621 | -0.0056 | -0.1761 | -0.431  | -0.2086 | -0.2773 | 0.2643  | -0.0597 | -0.1688 | -0.5742 | 0.0269  | 0.0922  |
| PY01958 | -0.3259 | 0.2375  | 0.3799  | 0.1009  | 0.2135  | 0.5122  | 0.6409  | 0.1327  | 0.2241  | -0.0608 | -0.2016 | 0.0401  |
| PY03427 | -0.7016 | 0.2476  | 0.3751  | -0.1797 | 0.0316  | -0.0309 | 0.0195  | 0.2924  | -0.0318 | 0.0914  | 0.3053  | -0.1451 |
| PY03538 | 0.1971  | -0.2421 | 0.2286  | -0.4137 | -0.1929 | -0.276  | 0.0498  | -0.3571 | 0.1293  | -0.8376 | -0.0519 | 0.3065  |
| PY04871 | 0.2878  | 0.3845  | -0.158  | -1.3162 | -0.6773 | -0.3026 | -0.0182 | -0.2562 | 0.0664  | -0.4101 | -0.4741 | 0.0123  |
| PY02812 | -0.113  | -0.0361 | 0.0199  | -0.4631 | 0.0159  | 0.0883  | 0.0141  | -0.0399 | -0.2711 | -0.1082 | -0.4904 | 0.0484  |
| PY02096 | -0.0184 | -0.0428 | 0.0927  | 0.0558  | -0.2604 | -0.0738 | -0.1868 | -0.0754 | 0.0534  | 0.378   | 0.1872  | -0.3189 |
| PY00114 | 0.127   | 0.2658  | 0.1073  | 0.2654  | 0.1781  | 0.0046  | -0.1406 | -0.0024 | -0.1749 | 0.0111  | 0.1893  | -0.108  |
| PY02159 | -0.4157 | 0.0242  | 0.0869  | -0.3859 | -0.3947 | 0.3026  | 0.2714  | 0.4653  | 0.3367  | -0.1466 | -0.4015 | -0.2871 |
| PY00987 | -0.3138 | -0.3232 | -0.4531 | 0.1583  | 0       | -0.1898 | -0.5693 | -0.186  | -0.1782 | 0.0978  | 0.1143  | -0.1301 |
| PY04716 | -0.2999 | -0.0502 | -0.2303 | -0.1163 | 0.664   | -0.0158 | -0.1237 | -0.1393 | -0.3427 | -0.0334 | 0.088   | 0.1523  |
| PY04108 | 0.4979  | 0.1346  | 0.5349  | 0.3014  | -0.0996 | -0.2214 | -0.1068 | -0.7123 | -0.1306 | -0.3769 | -0.6789 | -0.0254 |
| PY02480 | 0.5561  | 0.1996  | 0.2957  | 0.1618  | -0.1766 | 0.1034  | 0.0692  | -0.1801 | 0.1443  | 0.3899  | -0.253  | 0.1922  |
| PY02763 | 0.0336  | 0.1362  | -0.0133 | 0.4251  | 0.2724  | 0.2441  | 0.3468  | 0.3084  | -0.2794 | 0.1339  | -0.3627 | 0.231   |
| PY04374 | 0.0902  | -0.1851 | -0.2864 | 0.1741  | 0.3631  | -0.0258 | -0.0431 | 0.017   | 0.1243  | 0.1852  | 0.3701  | 0.0336  |
| PY05610 | 0.8651  | 0.5514  | 0.4909  | 0.0946  | -0.2956 | -0.045  | 0.095   | -0.1542 | 0.3668  | 0.1035  | -0.3561 | 0.1575  |
| PY00689 | -0.7688 | -0.1585 | -0.2566 | -0.9426 | -0.7346 | -0.084  | -0.1033 | 0.2217  | 0.2034  | -0.035  | 0.4684  | -0.1519 |
| PY05035 | 0.6454  | 0.2622  | 0.3939  | 0.1167  | 0.0558  | -0.0556 | 0.2274  | 0.1997  | 0.191   | 0.4066  | -0.0989 | 0.3154  |
| PY04534 | 0.4876  | 0.3451  | 0.3843  | -1.1484 | -0.1561 | -0.1388 | 0.1549  | -0.7374 | 0.0597  | -0.7491 | -0.2579 | 0.3347  |
| PY04573 | -0.2736 | 0.0299  | -0.0622 | 0.5103  | 0.2477  | 0.2325  | 0.0761  | 0.1042  | 0.0216  | 0.6144  | 0.4324  | 0.299   |
| PY01042 | -0.404  | -0.1703 | -0.4623 | 0.4434  | -0.0241 | 0.0341  | 0.1106  | 0.4153  | 0.195   | 1.128   | 0.9165  | 0.8211  |
| PY01502 | 0.4662  | 0.4519  | 0.1983  | 0.3908  | -0.1675 | 0.0385  | -0.1041 | -0.1209 | -0.2    | -0.366  | -0.2807 | 0.0437  |
| PY00318 | -0.8197 | -0.166  | -0.0402 | -0.1915 | -0.226  | -0.0915 | 0.2215  | 0.4216  | 0.0308  | 0.1331  | 0.4179  | 0.1603  |
| PY01780 | 0.0597  | 0.2248  | 0.2224  | -0.3455 | -0.3168 | 0.3039  | 0.3961  | 0.2836  | 0.2767  | 0.2524  | -0.3068 | 0.4453  |
| PY04258 | -0.1309 | 0.044   | -0.1731 | 0.7206  | 0.0865  | 0.062   | -0.0164 | 0.3997  | 0.0612  | 0.6162  | 0.125   | -0.0718 |
| PY02586 | 0.391   | 0.1035  | -0.1596 | 0.9954  | 0.5561  | -0.0727 | -0.244  | 0.1232  | -0.6538 | -0.2962 | 0.3594  | -0.5618 |
| PY05310 | 0.3007  | -0.1595 | -0.8543 | -0.6731 | -0.079  | -0.1736 | -0.2386 | 0.1122  | 0.0889  | 0.1863  | 0.4931  | 0.013   |
| PY04695 | -0.1901 | -0.1622 | -0.1209 | 0.1574  | 0.2087  | -0.0105 | -0.0135 | 0.1314  | 0.2482  | 0.1978  | 0.0894  | 0.0912  |
| PY01035 | -0.1437 | 0.2631  | 0.6673  | -0.2368 | -0.3142 | 0.2235  | 0.3588  | -0.0658 | 0.2427  | -0.364  | -0.2525 | 0.1698  |
| PY07178 | -0.7388 | -0.2054 | 0.0271  | -0.205  | 1.608   | -0.1412 | -0.0326 | 0.574   | 0.3346  | 0.0208  | -0.0796 | -0.3832 |
| PY01459 | 0.0362  | -0.2124 | -0.0989 | 0.2533  | -0.0442 | -0.1294 | -0.1006 | -0.233  | 0.1293  | 0.3276  | -0.1483 | 0.1124  |
| PY00711 | 0.3136  | -0.1146 | -0.1137 | 0.7553  | 0.5082  | -0.1616 | -0.126  | 0.1486  | -0.2276 | 0.6226  | 0.5326  | 0.224   |
| PY03834 | -1.1084 | -0.3553 | -0.1    | -0.3698 | 0.0526  | 0.245   | 0.6156  | 0.204   | 0.029   | -0.041  | 0.5689  | 0.0354  |
| PY02133 | -0.4817 | -0.3223 | -0.2452 | 0.5954  | -0.3166 | 0.1025  | -0.0466 | 0.5028  | 0.2841  | 0.4287  | -0.0804 | -0.3314 |
| PY06012 | 0.057   | 0.1506  | -0.1404 | 0.522   | 0.1612  | 0.2797  | -0.0737 | -0.2397 | -0.2855 | -0.0648 | -0.6497 | -0.0378 |
| PY02346 | 0.4268  | 0.1819  | 0.1225  | -0.1873 | 0.2863  | -0.0689 | -0.2223 | -0.4167 | -0.2751 | -0.1788 | -0.2053 | -0.2467 |
| PY03752 | 0.6711  | 0.1646  | 0.2451  | 0.0781  | -0.1381 | 0.0683  | 0.1199  | -0.1443 | 0.1885  | -0.0127 | -0.4719 | 0.183   |
| PY05164 | -2.066  | -0.8573 | -0.4816 | -0.6854 | -0.2896 | -0.5416 | -0.2495 | 0.3463  | 0.4186  | 0.238   | 0.546   | 0.1202  |
| PY06050 | -0.1179 | -0.1154 | -0.0108 | -0.0082 | 0.2773  | -0.0326 | -0.1377 | -0.1783 | -0.038  | 0.0034  | 0.0855  | 0.1218  |
| PY00894 | -0.2964 | -0.0425 | -0.2453 | -0.2109 | 0.0306  | -0.1755 | -0.0307 | 0.0247  | -0.0546 | 0.0375  | 0.2021  | -0.0462 |
| PY07220 | 0.1053  | 0.3038  | 0.5258  | -0.758  | -0.2553 | 0.1025  | 0.2661  | -0.143  | -0.2421 | -0.1978 | -0.3267 | 0.5502  |
| PY01194 | 0.4745  | 0.1756  | -0.0898 | 0.291   | 0.0749  | 0.0975  | -0.0841 | -0.0054 | -0.109  | 0.0421  | -0.5107 | -0.0917 |
| PY02261 | 0.2412  | 0.3903  | 0.6102  | 0.0713  | 0.2453  | 0.7938  | 0.5789  | -0.0349 | 0.133   | 0.0195  | -0.2851 | 0.0614  |
| PY02668 | 0.8825  | 0.3487  | 0.4873  | 0.6363  | -0.1532 | -0.0274 | 0.1146  | -0.2252 | -0.0413 | 0.0391  | -0.2869 | 0.2107  |
| PY07021 | 0.0102  | -0.3313 | -0.8242 | -0.7396 | -0.0003 | 0.0253  | -0.0718 | 0.1632  | 0.1705  | -0.5763 | 0.003   | 0.0386  |

|         |         |         |         |         |         |         |         |         |         |         |         |         |
|---------|---------|---------|---------|---------|---------|---------|---------|---------|---------|---------|---------|---------|
| PY03410 | 0.189   | -0.0036 | 0.2819  | -0.2997 | 0.0996  | -0.099  | 0.1852  | -0.0182 | 0.2224  | -0.1621 | 0.45    | 0.4661  |
| PY04584 | -1.3249 | -0.3512 | -0.4123 | -0.5219 | -0.4428 | -0.0817 | -0.0708 | 1.2104  | 0.2708  | 0.0097  | 0.8652  | -0.4264 |
| PY04281 | -0.8049 | -0.6764 | -0.3815 | -0.2921 | -0.5268 | -0.317  | 0.0821  | 0.1026  | 0.3216  | 0.0919  | 0.1233  | -0.1599 |
| PY07409 | -0.0957 | -0.0543 | -0.0503 | -0.1764 | -0.5034 | -0.57   | -0.449  | -0.2442 | -0.203  | -0.2901 | -0.3892 | -0.0885 |
| PY06967 | 0.3435  | 0.232   | 0.1389  | 0.1618  | 0.3239  | 0.3772  | 0.0786  | -0.2315 | 0.038   | -0.1    | -0.2971 | -0.07   |
| PY03389 | -0.0992 | 0.0848  | 0.1925  | 0.0819  | -0.0816 | -0.154  | 0.1535  | 0.2565  | 0.3831  | 0.3541  | 0.3184  | 0.8376  |
| PY06609 | 0.0449  | -0.0009 | -0.0965 | -0.1408 | 0.3095  | -0.114  | -0.0311 | 0.1909  | 0.0124  | -0.002  | 0.3722  | 0.3677  |
| PY00791 | -0.5755 | -0.3209 | -0.1743 | -0.0794 | 0.2682  | -0.0781 | -0.1152 | 0.1138  | -0.2662 | -0.034  | 0.2361  | -0.0872 |
| PY00468 | -0.3941 | -0.071  | -0.4303 | -0.0773 | -0.3556 | 0.3276  | 0.0771  | 0.2002  | -0.0838 | -0.3914 | 0.9821  | -0.156  |
| PY02018 | 0.5654  | 0.3493  | 0.433   | 0.4308  | -0.329  | 0.1057  | 0.0967  | -0.323  | -0.0372 | -0.1426 | -0.6697 | 0.0157  |
| PY04056 | 0.3948  | 0.2425  | 0.4977  | 0.1934  | 0.0344  | 0.1583  | 0.4061  | 0.0894  | 0.3343  | -0.1753 | -0.0166 | 0.2502  |
| PY04111 | -0.0682 | -0.1376 | -0.3937 | 0.7213  | 0.5035  | -0.2    | -0.1199 | 0.0576  | -0.002  | 0.4459  | 0.6237  | 0.2919  |
| PY06636 | 0.4842  | 0.3403  | 0.5171  | 0.4337  | -0.0027 | -0.0251 | -0.0984 | -0.1899 | 0.2148  | -0.7557 | -0.3442 | 0.0942  |
| PY05887 | 0.1844  | 0.4103  | -0.3185 | 0.2527  | 0.4919  | 0.0529  | 0.1905  | 0.181   | 0.3328  | -0.2593 | -0.2102 | 0.1005  |
| PY00154 | 0.0495  | 0.2642  | 0.3788  | -0.3689 | -0.3805 | 0.2203  | 0.3844  | -0.0352 | 0.2168  | -1.1459 | -0.6429 | 0.2762  |
| PY04825 | 0.0069  | 0.093   | 0.1086  | -0.4473 | -0.1651 | -0.0459 | -0.2718 | -0.0601 | -0.03   | 0.2682  | 0.1748  | -0.1749 |
| PY01219 | -0.2379 | -0.1671 | -0.0394 | 0.0984  | 0.1433  | 0.1448  | 0.0932  | 0.1596  | -0.3841 | -0.2246 | -0.2258 | -0.3925 |
| PY05922 | -0.3526 | -0.1036 | -0.0101 | 0.1953  | 0.2844  | -0.1203 | -0.2468 | 0.1271  | -0.4077 | 0.0529  | 0.1324  | -0.4293 |
| PY02243 | 0.1994  | -0.0765 | -0.2971 | 0.2006  | 0.1573  | 0.2593  | -0.0989 | -0.1411 | -0.1829 | -0.0692 | -0.4131 | -0.1092 |
| PY03816 | -0.1422 | -0.083  | 0.0285  | 0.5759  | 0.1238  | 0.0164  | 0.0133  | 0.327   | -0.0342 | 0.4855  | 0.1213  | 0.1554  |
| PY03337 | 0.6846  | 0.3948  | 0.2868  | 0.1552  | -0.1353 | -0.4144 | -0.1028 | -0.1845 | -0.713  | -0.2208 | -0.6279 | 0.2051  |
| PY02830 | -0.0933 | 0.3937  | 0.709   | 0.2801  | 0.2427  | 0.3192  | 0.6429  | 0.1987  | 0.2701  | -0.2623 | 0.0731  | 0.4968  |
| PY04089 | -0.6276 | -0.0757 | -0.0496 | 0.0465  | -0.0434 | 0.0525  | 0.007   | 0.1225  | 0.0955  | 0.1439  | -0.2846 | -0.3695 |
| PY06764 | -1.167  | -0.3689 | -0.178  | -0.2406 | -0.4255 | -0.4424 | -0.2626 | 0.3081  | 0.316   | -0.041  | 0.5506  | 0.0655  |
| PY02784 | 0.2382  | 0.0912  | -0.0127 | -0.1227 | -0.0538 | -0.1671 | -0.1207 | -0.1521 | -0.0671 | -0.115  | -0.2758 | -0.0081 |
| PY04226 | -0.1913 | 0.1982  | -0.0194 | -0.6781 | -0.4785 | -0.2404 | 0.149   | 0.0596  | 0.4835  | -0.1422 | -0.2622 | 0.0444  |
| PY02063 | -0.892  | -0.4934 | -0.8824 | 0.0615  | -0.0623 | -0.1174 | 0.2171  | 0.3145  | 0.554   | 0.406   | 0.6192  | 0.2923  |
| PY03111 | 0.2444  | 0.2835  | 0.3448  | 0.1817  | -0.883  | -0.0072 | 0.1379  | -0.3026 | 0.0161  | -0.1606 | -0.5315 | 0.2109  |
| PY04002 | -0.5899 | -0.0264 | 0.2829  | -0.7044 | -0.2617 | -0.3187 | -0.0622 | -0.2386 | -1.0431 | -0.0203 | -0.1463 | -0.491  |
| PY02559 | 0.3851  | -0.1876 | 0.1237  | 1.5094  | 0.5686  | 0.1227  | -0.1142 | 0.4351  | -0.0378 | 0.7925  | -0.206  | 0.082   |
| PY06739 | 0.1274  | -0.0256 | 0.2639  | 0.2028  | 0.6736  | 0.1107  | 0.0762  | -0.2888 | -0.0363 | 0.2153  | 0.1152  | 0.1919  |
| PY02065 | -0.1577 | -0.2145 | -0.3507 | -0.2143 | -0.0697 | -0.1898 | -0.1273 | -0.0087 | 0.1269  | 0.2476  | -0.1487 | -0.0201 |
| PY05751 | -0.2236 | -0.3866 | -0.1019 | 0.5172  | 0.2334  | 0.2747  | -0.0004 | 0.4064  | 0.0625  | -0.3955 | 0.4066  | -0.3167 |
| PY02371 | 0.0903  | -0.0149 | -0.2286 | -0.5737 | -0.131  | -0.4796 | -0.4741 | -0.1729 | -0.2663 | -0.5129 | -0.0877 | -0.329  |
| PY07118 | 0.1797  | 0.0674  | 0.3388  | 0.1947  | 0.3917  | 0.1277  | 0.1458  | 0.0397  | -0.1842 | -0.0464 | -0.2393 | 0.3719  |
| PY03599 | -0.033  | -0.0986 | 0.1424  | -0.0495 | -0.037  | -0.0692 | -0.1184 | -0.1155 | -0.093  | -0.1116 | 0.0192  | 0.0912  |
| PY05804 | -0.1293 | -0.4336 | 0.3091  | 0.7953  | 0.2157  | -0.0309 | 0.0652  | 0.3755  | 0.181   | 0.4685  | 0.1779  | 0.0069  |
| PY07484 | -0.0231 | -0.2332 | 0.0345  | -0.3917 | 0.0848  | -0.1925 | -0.4328 | -0.1579 | -0.0531 | -0.2133 | -0.2138 | -0.0287 |
| PY07576 | -0.4605 | -0.3105 | 0.3557  | -0.6751 | -0.2267 | 0.2803  | 0.1334  | 0.0465  | 0.3053  | 0.0591  | 0.3898  | -0.0555 |
| PY03833 | 0.979   | 0.2868  | 0.6427  | 0.792   | 0.0489  | 0.0733  | 0.0892  | -0.1788 | -0.0593 | 0.2069  | -0.4854 | 0.146   |
| PY05425 | 0.2895  | 0.1183  | 0.4997  | 0.3555  | -1.1963 | -0.2853 | -0.0364 | 0.0752  | 0.401   | 0.1382  | -0.189  | 0.3721  |
| PY03327 | -0.0755 | -0.0523 | -0.0244 | -0.1413 | 0.5502  | 0.274   | 0.1665  | 0.0054  | -0.1382 | -0.2886 | 0.182   | 0.1256  |
| PY02004 | -0.6016 | -0.5353 | -0.5681 | 0.1362  | -0.1541 | -0.212  | -0.3634 | 0.0726  | -0.0467 | 0.215   | 0.1543  | -0.5921 |
| PY06039 | -0.2223 | -0.021  | -0.3481 | 0.2457  | -0.3417 | -0.1885 | -0.2155 | -0.0251 | 0.0644  | 0.449   | 0.0542  | 0.0395  |
| PY03267 | -0.117  | 0.1084  | 0.031   | 0.2932  | 0.0883  | -0.1859 | -0.3436 | -0.1249 | -0.245  | -0.0428 | -0.0889 | -0.2769 |
| PY02189 | 0.9213  | 0.4513  | 0.3455  | 0.4585  | -0.0153 | 0.0747  | 0.1271  | -0.0497 | 0.0825  | 0.0307  | -0.6136 | 0.1787  |
| PY06229 | 0.1168  | 0.092   | 0.124   | -0.1203 | -0.519  | -0.1803 | -0.0033 | -0.7709 | -0.7453 | 0.0548  | -0.1849 | -0.7115 |
| PY04841 | 0.4642  | -0.2589 | -0.5046 | 0.1839  | 0.2786  | -0.3634 | -0.5007 | -0.1562 | -0.2987 | 0.0611  | -0.1896 | -0.0967 |
| PY05446 | -0.5964 | 0.0866  | 0.2356  | 1.066   | 0.0859  | -0.1683 | -0.2211 | -0.1318 | -0.0067 | -0.8034 | -0.1136 | -0.2668 |
| PY03127 | 0.227   | 0.112   | -0.1793 | -0.014  | 0.1299  | -0.4568 | -0.578  | -0.4668 | -0.482  | -0.5962 | -0.1937 | -0.6567 |
| PY03989 | -0.2433 | -0.0366 | -0.1448 | -0.0245 | -0.115  | -0.2292 | 0.0016  | 0.0739  | 0.1063  | -0.1356 | 0.1458  | -0.0265 |
| PY02841 | 0.1717  | 0.1224  | 0.4331  | -0.1133 | 0.1321  | -0.0246 | 0.0929  | -0.4525 | -0.1769 | -0.769  | -0.5616 | -0.0182 |
| PY04146 | 0.5523  | 0.3977  | 0.1816  | -0.0712 | -0.2782 | -0.0528 | 0.1313  | -0.147  | -0.2354 | -0.0343 | -0.7811 | 0.1192  |
| PY07060 | -0.7113 | -0.0095 | -0.5198 | -0.2449 | -0.2555 | -0.1193 | -0.279  | 0.0937  | -0.116  | 0.0348  | -0.0534 | -0.2856 |
| PY04244 | 0.2573  | 0.0513  | 0.2624  | 0.1622  | 0.0885  | 0.1745  | 0.2046  | 0.1918  | 0.1863  | 0.3572  | -0.0124 | 0.4524  |
| PY03240 | -1.4702 | -0.4537 | -0.5218 | -0.3295 | -2.0106 | -0.5202 | -0.1515 | 0.1163  | 0.4789  | 0.0569  | 0.7865  | 0.0842  |
| PY03819 | 0.5232  | 0.3595  | -0.0739 | -0.0995 | -0.1025 | -0.58   | -0.553  | -0.1173 | -0.2543 | -0.3363 | 0.1707  | -0.321  |
| PY05930 | -0.3509 | 0.144   | 0.3473  | 0.2585  | -0.2842 | 0.0093  | 1.0283  | 0.4025  | 0.9131  | 0.2974  | 0.6306  | 1.2327  |
| PY00264 | -0.3768 | 0.1116  | 0.1462  | 1.0089  | -0.233  | -0.3435 | -0.3941 | 0.2542  | -0.1811 | 0.3711  | 0.289   | -0.1166 |
| PY01994 | 0.145   | 0.2379  | 0.3089  | 0.9808  | 0.8236  | 0.2745  | 0.2809  | -0.1143 | 0.132   | 0.2132  | 0.0679  | 0.3279  |
| PY01490 | -0.0133 | 0.0576  | 0.0885  | -0.6475 | -0.6557 | -0.3185 | -0.1677 | -0.2137 | 0.2903  | -0.6711 | -0.3442 | -0.1019 |
| PY03865 | 0.2958  | -0.2636 | -0.278  | 0.2873  | 0.2034  | -0.1715 | 0.0154  | 0.2541  | -0.0061 | 0.751   | 0.3259  | -0.1147 |
| PY00290 | 0.2175  | -0.0462 | -0.198  | -0.0364 | 0.1407  | -0.1162 | -0.0933 | -0.2338 | -0.7244 | 0.1205  | -0.2183 | -0.0783 |

|         |         |         |         |         |         |         |         |         |         |         |         |         |
|---------|---------|---------|---------|---------|---------|---------|---------|---------|---------|---------|---------|---------|
| PY05073 | -0.7536 | -0.4962 | -1.1321 | -0.342  | -0.0667 | 0.3314  | 0.0162  | 0.201   | 0.0267  | 0.1273  | -0.2005 | -0.1764 |
| PY03802 | 0.6343  | 0.2867  | 0.1662  | -0.2558 | 0.0767  | 0.0267  | -0.1013 | -0.2686 | -0.1517 | -0.1921 | -0.0848 | -0.0589 |
| PY05236 | -0.2465 | 0.2704  | 0.7898  | 0.2357  | 0.0393  | 0.3673  | 0.94    | 0.4094  | -0.9578 | 0.3093  | 0.0648  | 0.3886  |
| PY07390 | -1.1093 | 0.1933  | -0.1025 | -0.3224 | 0.1231  | -0.3685 | -0.2001 | -0.0562 | 0.0677  | 0.009   | 0.327   | -0.0076 |
| PY00433 | -0.0029 | -0.1552 | 0.0504  | -0.0436 | 0.199   | 0.3398  | 0.3281  | 0.5067  | 0.0034  | 0.1528  | 0.6253  | 0.1364  |
| PY02191 | 0.5548  | 0.3207  | 0.4151  | -0.0212 | 0.0515  | -0.1933 | -0.3436 | -0.3436 | -0.183  | -0.2324 | -0.4586 | -0.3344 |
| PY02874 | -0.1004 | -0.2099 | -0.2262 | -0.2918 | -0.0163 | -0.1371 | 0.0093  | -0.0096 | 0.1845  | -0.3145 | 0.0035  | 0.1588  |
| PY04935 | 0.7414  | 0.1125  | 0.4017  | 0.5295  | 0.4061  | 0.0218  | 0.0623  | -0.0741 | 0.1228  | 0.3422  | 0.0801  | 0.3337  |
| PY03650 | -0.9255 | -0.1159 | -0.2895 | -0.3095 | -0.4016 | -0.3273 | -0.3255 | 0.2667  | 0.3728  | -0.5983 | 0.2585  | -0.4319 |
| PY07611 | 0.2384  | -0.062  | -0.4746 | 0.7003  | 0.4111  | -0.2988 | -0.1444 | 0.0977  | 0.0974  | 0.4532  | 0.2461  | -0.2816 |
| PY04747 | 0.2972  | -0.1898 | 0.3135  | 0.0689  | 0.1764  | 0.1122  | -0.2044 | 0.075   | -0.048  | 0.0018  | 0.1139  | 0.1505  |
| PY01259 | -0.3323 | -0.4056 | 0.013   | -0.0823 | 0.5551  | 0.076   | -0.0107 | -0.0156 | -0.202  | -0.1038 | 0.124   | -0.1138 |
| PY04880 | -0.0149 | 0.1062  | 0.0559  | -0.3414 | -0.3724 | -0.2393 | 0.0943  | -0.1836 | 0.1493  | -0.4799 | -0.3596 | 0.2696  |
| PY02200 | -1.2138 | -0.6837 | -0.6258 | -0.6976 | 0.0121  | -0.3715 | -0.1433 | 0.2206  | 0.2984  | -0.2266 | 0.3038  | -0.2349 |
| PY04100 | -0.5935 | -0.4675 | -0.529  | -0.8421 | -0.2316 | 0.0951  | 0.2405  | 0.2611  | 0.1628  | -0.0246 | -0.0508 | 0.1578  |
| PY01876 | -0.2859 | -0.2243 | -0.0759 | 0.1077  | 0.3458  | 0.2222  | 0.2678  | 0.0734  | -0.053  | 0.0719  | -0.0531 | -0.3404 |
| PY05424 | 0.1804  | 0.0482  | -0.1809 | 0.3349  | 0.0415  | 0.2076  | 0.0454  | 0.0976  | 0.0683  | 0.3001  | 0.1697  | 0.2853  |
| PY06311 | -0.0985 | -0.26   | 0.1266  | -0.506  | -0.2408 | -0.1811 | -0.1975 | -0.1994 | 0.0705  | -0.2782 | -0.0201 | 0.1483  |
| PY05041 | 0.0816  | -0.0731 | 0.1732  | -0.2644 | 0.0596  | 0.0279  | 0.042   | -0.2974 | 0.0175  | -0.2619 | 0.5516  | 0.1241  |
| PY05867 | -1.7654 | -0.609  | -0.2471 | -0.4366 | -0.3709 | -0.192  | -0.194  | 0.132   | 0.0571  | 0.2262  | 0.7698  | 0.1031  |
| PY02240 | -0.9041 | -0.3308 | -0.4127 | -0.4952 | -0.1196 | 0.0878  | 0.0141  | 0.0472  | 0.0185  | -0.6128 | -0.4494 | -0.3791 |
| PY05780 | -1.4035 | -0.2422 | 0.0725  | -0.803  | -0.4529 | -0.2228 | -0.1918 | 0.0745  | -0.3519 | 0.0433  | 0.5157  | -0.2228 |
| PY03246 | 0.2626  | 0.1083  | 0.1503  | -0.3218 | 0.3765  | 0.1862  | -0.1763 | -0.2508 | -0.1563 | -0.1298 | -0.1382 | -0.0543 |
| PY01341 | 0.0378  | 0.1353  | 0.0783  | -0.1928 | 0.2827  | 0.2521  | 0.2012  | -0.5121 | -0.1877 | -0.463  | 0.0812  | 0.0874  |
| PY03007 | -0.2019 | -0.0757 | 0.4121  | 0.4845  | -0.1012 | -0.0042 | 0.0649  | -0.0235 | 0.3374  | 0.2796  | 0.039   | 0.3688  |
| PY02123 | -0.4939 | 0.2461  | 0.386   | -0.484  | -0.2612 | -0.1636 | -0.1325 | -0.0837 | 0.1441  | 0.2518  | 0.5213  | 0.3118  |
| PY00921 | -0.0189 | 0.0147  | -0.5563 | -0.0047 | -0.2429 | -0.2663 | -0.5186 | 0.1398  | -0.0869 | -0.8268 | 0.1807  | -0.3461 |
| PY02603 | 0.3934  | 0.146   | -0.0319 | 0.0807  | 0.2728  | 0.4112  | 0.1412  | 0.1371  | 0.1025  | 0.2499  | 0.1155  | 0.3623  |
| PY04646 | 0.1813  | 0.1903  | 0.0195  | 1.3439  | 0.9222  | 0.3778  | -0.0455 | -0.3985 | 0.1889  | 1.1207  | 0.7208  | 0.0672  |
| PY05480 | 0.0456  | 0.0192  | -0.5472 | 1.087   | 0.588   | 0.3334  | 0.0716  | 0.0841  | -0.2251 | 0.4917  | 0.0895  | 0.2092  |
| PY01634 | -0.1164 | -0.2683 | -0.2498 | 0.3467  | 0.0646  | -0.4131 | -0.1597 | 0.2459  | -0.0807 | 0.3181  | 0.8072  | 0.0426  |
| PY06188 | 0.4252  | 0.1539  | -0.2964 | 0.1615  | 0.1143  | -0.0877 | -0.249  | -0.1906 | -0.3698 | -0.1472 | 0.12    | -0.2934 |
| PY05190 | 0.455   | 0.1305  | 0.2384  | 0.112   | 0.2006  | 0.0588  | 0.0669  | -0.2963 | -0.1325 | -0.3097 | -0.5691 | -0.0465 |
| PY02932 | -0.1142 | -0.1611 | -0.0421 | -0.2382 | 0.5018  | 0.5184  | -0.0121 | 0.345   | -0.0881 | 0.015   | -0.1314 | -0.3431 |
| PY07356 | 0.2784  | 0.0177  | 0.1201  | -0.1081 | -0.0875 | -0.0224 | 0.0227  | -0.336  | -0.3864 | -0.4728 | -0.3731 | -0.892  |
| PY02418 | -0.5506 | -0.3592 | 0.1087  | -0.465  | -0.0441 | -0.0035 | 0.0073  | -0.3384 | -0.5059 | 0.0927  | 0.3115  | 0.4635  |
| PY00592 | 0.0061  | -0.1615 | -0.0533 | 0.4951  | 0.5173  | 0.0665  | -0.0711 | -0.1638 | -0.2161 | 0.0889  | 0.147   | 0.0609  |
| PY04291 | -0.2895 | -0.2048 | -0.2484 | -1.0973 | -0.0177 | -0.0033 | 0.2226  | -0.7721 | -0.3297 | -0.6525 | -0.2689 | -0.0027 |
| PY02207 | -0.4462 | -0.4556 | -0.1743 | -0.209  | 0.0218  | 0.163   | 0.2016  | 0.2766  | 0.6042  | 0.3102  | 0.3657  | 0.1337  |
| PY06361 | 0.2021  | -0.1912 | -0.4099 | 0.1297  | 0.719   | 0.0836  | -0.1972 | -0.3951 | -0.3596 | -0.0027 | -0.4543 | -0.1267 |
| PY02508 | -0.4517 | 0.0525  | 0.1234  | 0.3488  | 0.1604  | 0.1589  | 0.1152  | -0.0237 | 0.0081  | 0.114   | 0.0884  | -0.2318 |
| PY00206 | -0.0487 | -0.0525 | -0.1075 | -0.7902 | -0.031  | -0.0467 | 0.0332  | -0.0442 | -0.0045 | -0.3011 | -0.0417 | 0.2428  |
| PY07549 | 0.784   | 0.3423  | 0.2862  | -0.0378 | -0.238  | -0.2129 | 0.1537  | -0.2434 | 0.1098  | -0.5677 | -0.1525 | 0.3453  |
| PY02675 | 0.8485  | -0.0759 | -0.0193 | 0.4818  | -0.1501 | -0.2609 | -0.0767 | -0.6214 | -0.0977 | -0.2844 | -0.3586 | -0.0008 |
| PY02913 | 0.7289  | 0.2171  | 0.6074  | 0.1786  | -0.0959 | 0.2678  | 0.6178  | 0.0926  | 0.4822  | -0.2143 | -0.4538 | 0.4274  |
| PY03455 | 0.3053  | 0.3316  | 0.309   | 0.0042  | -0.1347 | -0.1841 | -0.1678 | -0.1657 | -0.4402 | -0.2395 | -0.321  | -0.1369 |
| PY04683 | -0.6443 | 0.1015  | -0.7249 | 0.0316  | -1.0687 | -0.1345 | -0.1452 | 0.8169  | 0.3709  | -0.4215 | 0.0762  | -0.3569 |
| PY04951 | 0.2961  | 0.2431  | 0.2093  | 0.1715  | 0.0861  | -0.1902 | -0.2262 | -0.5676 | -0.3875 | -1.0031 | -0.2864 | -0.1942 |
| PY03412 | -0.621  | -0.7128 | -0.4391 | -0.5232 | -0.556  | 0.0532  | 0.1759  | 0.3252  | 0.4065  | 0.2036  | 0.1191  | -0.0356 |
| PY02185 | -0.4387 | -0.325  | -0.1863 | 0.5628  | -0.0262 | -0.4017 | -0.5509 | 0.2354  | 0.0905  | 0.4805  | 0.5858  | -0.0818 |
| PY04160 | 0.7937  | 0.4472  | 0.5114  | 0.634   | 0.1442  | 0.057   | 0.1812  | 0.0064  | -0.0009 | 0.0312  | -0.0337 | 0.3438  |
| PY06684 | -1.2379 | -0.5271 | -0.2768 | -0.8041 | -0.5684 | -0.3483 | -0.17   | 0.2379  | 0.2203  | 0.285   | 0.4607  | -0.0305 |
| PY01662 | 0.0709  | 0.109   | 0.087   | -0.2922 | -0.1332 | -0.3316 | -0.1706 | 0.0364  | 0.1167  | -0.2784 | 0.2751  | 0.162   |
| PY05513 | -0.1322 | -0.2446 | -0.0304 | -0.6645 | -0.2153 | -0.2802 | -0.0496 | -0.1179 | 0.0863  | 0.135   | -0.0007 | 0.5838  |
| PY06441 | -0.1695 | 0.0212  | -0.0017 | 0.3224  | 0.0908  | 0.4987  | -0.2317 | 0.0807  | 0.0538  | 0.4047  | 0.4599  | -0.0342 |
| PY01861 | 0.6667  | 0.3693  | 0.0466  | 0.2763  | -0.1711 | -0.0468 | -0.0333 | -0.1535 | -0.0257 | 0.2312  | -0.4315 | 0.1348  |
| PY07256 | 0.0865  | -0.0422 | 0.149   | 0.6592  | 0.6058  | 0.575   | 0.0955  | 0.1406  | -0.1203 | 0.7716  | 0.3254  | 0.2279  |
| PY01938 | -0.9269 | -0.4358 | -0.798  | -0.8802 | 0.1439  | -0.2817 | -0.1082 | -0.1017 | 0.1883  | 0.3142  | 0.9213  | 0.1024  |
| PY04472 | 0.1491  | -0.3502 | -0.0032 | -0.1523 | 0.293   | 0.1545  | 0.3175  | 0.319   | 0.1892  | 0.4754  | 0.4324  | 0.7457  |
| PY03259 | -0.0587 | 0.0455  | 0.0018  | -0.6285 | -0.6869 | -0.7971 | 0.0852  | -0.5201 | -1.1577 | -0.7882 | -0.8916 | -0.6857 |
| PY03494 | 0.195   | 0.083   | -0.4736 | -0.5724 | 0.1922  | -0.0523 | -0.1889 | -0.2228 | -0.1654 | -0.2716 | 0.0494  | -0.2296 |
| PY06242 | -0.4289 | 0.0624  | -0.1105 | -0.3254 | -0.3079 | 0.3112  | -0.0132 | -0.0006 | -0.1258 | -0.1233 | -0.089  | -0.5936 |
| PY04518 | -0.0861 | -0.1975 | -0.2336 | 0.0732  | -0.0156 | -0.037  | -0.0224 | 0.1357  | 0.0142  | -0.0483 | -0.3489 | -0.092  |

|         |          |         |         |         |         |         |         |         |         |         |         |         |
|---------|----------|---------|---------|---------|---------|---------|---------|---------|---------|---------|---------|---------|
| PY06203 | 0.1281   | 0.1387  | 0.2608  | 0.1243  | -0.0523 | 0.9734  | 0.303   | 0.0106  | 0.3322  | -0.5042 | 0.0226  | 0.2427  |
| PY00187 | 0.404    | 0.3008  | 0.3029  | -0.1462 | -0.3782 | -0.2034 | -0.1225 | -0.1631 | 0.1826  | -0.1914 | -0.282  | 0.0025  |
| PY07518 | 0.207    | 0.187   | -0.2557 | -0.0852 | 0.205   | -0.0514 | -0.2181 | -0.0048 | -0.2631 | 0.0581  | 0.1792  | -0.1118 |
| PY01934 | 0.0008   | 0.0718  | 0.0359  | -0.3904 | -0.4357 | 0.1013  | 0.0013  | -0.0857 | 0.2399  | -1.0664 | -0.1151 | 0.0553  |
| PY05834 | -0.00591 | 0.5515  | 0.3459  | 0.7674  | 0.4326  | 1.0812  | 0.378   | 0.7008  | 0.3107  | 1.4956  | 0.8952  | 0.4275  |
| PY07313 | -0.1683  | -0.3918 | -0.3974 | 0.1704  | 0.3646  | -0.3379 | -0.4945 | -0.0783 | -0.0947 | 0.012   | 0.6796  | 0.1342  |
| PY00413 | -1.3348  | -0.5835 | -0.0622 | -0.4253 | -0.2197 | -0.1169 | -0.2066 | 0.2053  | 0.0008  | -0.0962 | 0.4853  | -0.3971 |
| PY00880 | -1.2182  | -0.3698 | 0.0746  | -0.0708 | 0.1436  | -0.2367 | -0.1871 | 0.1021  | -0.1816 | 0.1498  | 0.702   | -0.3789 |
| PY04467 | -0.3838  | -0.1516 | -0.2949 | 1.2958  | -1.5188 | 0.1159  | 0.0724  | 0.6823  | 0.307   | 1.0637  | 0.7855  | 0.366   |
| PY00566 | -1.0439  | -0.1743 | -0.3296 | 0.9367  | -0.1304 | -0.558  | -0.2874 | 0.5066  | 0.1572  | -0.0719 | 1.3691  | -0.1114 |
| PY03980 | -0.1203  | -0.4278 | -0.2877 | -0.6934 | -0.1603 | -0.1913 | 0.0781  | -0.0248 | 0.2898  | -0.4045 | 0.4473  | -0.0151 |
| PY00447 | -0.7752  | -0.2865 | 0.2351  | -0.2223 | -0.5686 | -0.49   | -0.017  | 0.2668  | 0.4034  | -0.3983 | 0.5303  | 0.1525  |
| PY05755 | -0.3506  | 0.0272  | 0.1557  | -0.0798 | -0.1326 | -0.4119 | -0.5073 | -0.1425 | -0.1814 | -0.3389 | 0.2249  | -0.439  |
| PY07026 | -1.0873  | -0.2999 | 0.2066  | -0.1966 | -0.4139 | 0.1467  | -0.0175 | 0.2974  | 0.3963  | -0.0247 | 0.4439  | -0.2628 |
| PY03603 | -0.8315  | -0.2943 | -0.4634 | -0.3028 | -0.0113 | -0.2044 | -0.4086 | -0.0762 | -0.0872 | -0.1209 | 0.5772  | -0.036  |
| PY04887 | 0.1544   | 0.2181  | -0.1677 | 0.0874  | -0.0415 | -0.1783 | 0.0443  | -0.0847 | -0.093  | -0.4587 | -0.3879 | 0.077   |
| PY00656 | -0.5485  | -0.4126 | 0.0661  | -0.0466 | -0.0399 | 0.1118  | -0.1214 | 0.0046  | -0.1839 | 0.0414  | 0.2535  | -0.0196 |
| PY03380 | -0.0672  | -0.3799 | -0.7947 | -0.4431 | -0.021  | -0.2479 | -0.2656 | 0.0266  | -0.3741 | -0.1036 | 0.0598  | -0.1139 |
| PY01522 | 0.3271   | 0.2868  | 0.6437  | -0.0957 | 0.2248  | 0.3137  | 0.4207  | -0.1231 | 0.2794  | -0.2937 | -0.2671 | 0.226   |
| PY02773 | 0.0112   | -0.0642 | -0.256  | 0.2603  | 0.5248  | 0.4492  | -0.2293 | 0.3238  | 0.0763  | 0.5009  | 0.5443  | -0.0078 |
| PY03529 | 0.5254   | 0.3512  | 0.1331  | 0.7392  | -0.0981 | 0.1805  | -0.0766 | -0.1511 | 0.0574  | 0.2748  | -0.1981 | 0.1997  |
| PY06258 | -0.2662  | -0.1945 | -0.1495 | -0.2566 | 0.2997  | 0.2597  | 0.1259  | 0.2442  | -0.0255 | 0.2387  | 0.1775  | 0.1573  |
| PY05065 | -0.0156  | -0.0031 | -0.3065 | 0.2502  | -0.1953 | -0.0907 | -0.2522 | 0.2614  | 0.2147  | -0.0462 | 0.215   | 0.0621  |
| PY02924 | 0.1902   | -0.0749 | -0.2811 | -0.2917 | -0.0474 | -0.0464 | -0.2314 | -0.1037 | -0.0546 | -0.2781 | -0.2369 | -0.7606 |
| PY04098 | -1.0714  | -0.6304 | -0.5735 | -0.5698 | -0.2973 | -0.3379 | -0.355  | 0.1601  | 0.0697  | 0.1416  | 0.5     | -0.0866 |
| PY01844 | 0.4645   | 0.1682  | 0.6547  | 0.2238  | -0.5318 | 0.0288  | 0.7286  | 0.3705  | 0.8428  | 0.2533  | -0.3003 | 0.5619  |
| PY02685 | -0.3531  | 0.0461  | 0.2169  | 0.0246  | -0.0273 | -0.4479 | -0.2864 | 0.1187  | 0.1919  | 0.1408  | -0.0141 | -0.0682 |
| PY07071 | -0.4964  | -0.2264 | 0.0124  | -0.1335 | 0.0349  | 0.1667  | 0.1167  | 0.2558  | 0.2244  | 0.2474  | 0.207   | 0.1364  |
| PY03573 | 0.3368   | -0.0534 | -0.2622 | -0.6206 | -0.2602 | -0.1391 | -0.0639 | -0.1204 | 0.1576  | 0.1281  | -0.0266 | 0.5493  |
| PY00065 | -0.5829  | 0.0688  | 0.0495  | -0.2394 | 0.2449  | -0.0352 | -0.013  | -0.0394 | -0.3641 | -0.2871 | -0.0333 | -0.2814 |
| PY03778 | -0.7743  | -0.4548 | -0.7516 | -0.3371 | -0.4239 | 0.0477  | 0.1865  | 0.2795  | 0.1389  | 0.0655  | 0.359   | -0.41   |
| PY05880 | -0.584   | -0.1582 | 0.3656  | 0.1966  | 0.1919  | 0.1679  | 0.0483  | 0.1448  | 0.546   | 0.202   | 0.423   | -0.0676 |
| PY00813 | -0.2992  | -0.3803 | -0.5121 | 0.2962  | 0.6559  | -0.0843 | -0.084  | 0.0274  | -0.1006 | 0.1342  | 0.1354  | 0.2734  |
| PY02475 | -0.0724  | 0.1786  | -0.2931 | 0.154   | 0.226   | -0.1882 | -0.1387 | 0.1692  | 0.267   | 0.3839  | 0.2806  | -0.0442 |
| PY05412 | -0.096   | -0.0363 | -0.06   | 0.1359  | -0.3977 | 0.261   | 0.0526  | 0.1727  | -0.6313 | -0.1538 | -0.3374 | 0.2014  |
| PY01260 | -0.3267  | 0.0421  | 0.2895  | -0.2432 | -0.1401 | 0.0898  | -0.0311 | -0.0465 | -0.1821 | 0.2671  | 0.1395  | 0.0605  |
| PY01213 | -0.0527  | 0.0073  | 0.0199  | -0.4086 | 0.0571  | 0.2297  | 0.2174  | 0.0059  | 0.3566  | -0.2536 | -0.1829 | -0.0085 |
| PY02235 | 0.3373   | 0.333   | 0.1963  | -1.0685 | -0.9581 | -0.0986 | 0.6652  | 0.0324  | 0.7199  | -0.1391 | -0.2252 | 0.9069  |
| PY02706 | 0.3625   | -0.305  | -0.1963 | 1.3091  | 1.0392  | 0.0672  | -0.1583 | 0.549   | -0.2439 | 1.0101  | 0.0214  | 0.0288  |
| PY05846 | -0.0341  | -0.2516 | -0.7043 | -0.2937 | 0.1306  | 0.0131  | -0.4958 | -0.2151 | -0.3736 | -0.2763 | -0.434  | -0.3033 |
| PY00892 | -0.061   | 0.4039  | 0.3536  | 0.6748  | 0.3364  | 0.6134  | 0.4026  | 0.3941  | 0.4954  | 0.9124  | 0.4636  | 0.3485  |
| PY05517 | -1.8881  | -0.0012 | -0.2864 | -0.54   | -0.3171 | -0.1622 | -0.2991 | -0.1545 | 0.1083  | -0.134  | 0.2558  | -0.4807 |
| PY06728 | 0.4367   | 0.316   | 0.05    | 0.1944  | 0.0832  | -0.1978 | -0.1081 | -0.2794 | -0.3901 | -0.147  | -0.0644 | -0.3622 |
| PY03469 | -0.4789  | -0.2133 | -0.2772 | 0.7188  | 0.1789  | 0.1435  | -0.1588 | 0.4579  | -0.0551 | 0.5541  | 0.5597  | 0.5185  |
| PY00120 | 0.706    | 0.2011  | -0.0345 | 0.9288  | 0.5577  | 0.2491  | 0.0695  | -0.0385 | -0.053  | 0.0859  | -0.4401 | -0.1034 |
| PY04633 | -0.1093  | 0.1998  | 0.0972  | -0.715  | -0.0095 | 0.6265  | 0.4822  | -0.0717 | 0.0351  | -0.3931 | 0.0932  | 0.0889  |
| PY06048 | -0.0991  | -0.2076 | -0.4853 | -0.9368 | -0.8914 | -0.4311 | 0.4004  | 0.2594  | 0.7121  | 0.3194  | 0.054   | 1.0236  |
| PY01516 | -0.6456  | -0.2837 | -0.3444 | 0.1362  | 0.2701  | 0.0621  | -0.1172 | 0.0493  | -0.0028 | 0.1519  | -0.0099 | -0.0926 |
| PY05146 | 0.6799   | 0.2629  | 0.1305  | -0.0018 | -0.0515 | -0.04   | -0.0992 | -0.1522 | -0.071  | -0.3156 | -0.2422 | -0.2202 |
| PY03601 | 0.085    | 0.0617  | -0.0717 | 0.137   | 0.2125  | -0.1094 | -0.4686 | -0.0962 | -0.5193 | -0.2277 | -0.0113 | -0.7865 |
| PY03871 | -0.1674  | 0.1162  | -0.0827 | 0.0235  | 0.3021  | 0.094   | 0.0153  | 0.0938  | 0.1136  | 0.3211  | 0.1741  | -0.2608 |
| PY02973 | 0.173    | -0.0974 | -0.1107 | 0.063   | -0.1008 | -0.1488 | -0.197  | 0.146   | -0.0188 | -0.0418 | 0.0651  | -0.5249 |
| PY00699 | 0.1324   | -0.128  | -0.1895 | 0.0284  | -0.1289 | -0.4655 | 0.1572  | -0.2164 | 0.0177  | -0.0524 | -0.094  | 0.3     |
| PY04605 | -0.1041  | 0.0856  | 0.1512  | 0.4537  | 0.2783  | 0.0981  | -0.2517 | -0.1705 | -0.1625 | 0.3211  | 0.0082  | 0.262   |
| PY06702 | -0.2579  | -0.0974 | -0.1419 | 0.2187  | -0.0033 | 0.0557  | 0.0013  | 0.2279  | 0.4789  | 0.4565  | -0.0934 | -0.0937 |
| PY04360 | 0.6099   | 0.2411  | -0.5554 | 0.7826  | 0.3231  | -0.0041 | -0.1826 | -0.1605 | -0.0763 | -0.0687 | -0.4249 | -0.2835 |
| PY03936 | -0.8756  | -1.142  | -1.0888 | 0.0327  | -0.3739 | -0.7548 | -0.3964 | 0.4461  | 0.321   | 0.6785  | 0.3429  | 0.5875  |
| PY01571 | 0.8351   | 0.4408  | -0.0548 | 0.4009  | 0.4372  | -0.1147 | -0.0085 | -0.1086 | -0.4415 | 0.1379  | -0.1224 | 0.3116  |
| PY02288 | -0.1476  | 0.0309  | 0.1009  | -0.644  | -0.2454 | -0.0128 | 0.0145  | -0.0867 | -0.2969 | -0.2816 | 0.1818  | 0.1372  |
| PY01545 | 0.1274   | -0.0467 | 0.0867  | -0.3061 | -0.3687 | -0.0328 | 0.0626  | -0.4401 | -0.235  | -0.3735 | 0.0579  | 0.2984  |
| PY01016 | -0.4508  | 0.1421  | 0.193   | 0.1692  | -0.5431 | -0.0322 | -0.0189 | 0.2873  | 0.1754  | -0.2585 | -0.1702 | -0.3198 |
| PY04219 | 0.4123   | 0.0078  | -0.0463 | 0.1526  | 0.275   | -0.1504 | 0.0081  | -0.1093 | -0.2627 | 0.1398  | -0.5096 | 0.0897  |
| PY04803 | -0.1638  | 1.4525  | 0.3221  | -0.1933 | -0.1067 | -0.882  | -0.2478 | -0.2594 | -0.0395 | -0.777  | 0.0382  | -0.5305 |



|         |         |         |         |         |         |         |         |         |         |         |         |         |
|---------|---------|---------|---------|---------|---------|---------|---------|---------|---------|---------|---------|---------|
| PY06788 | -0.0086 | 0.0348  | 0.0276  | -0.2319 | -0.0109 | -0.143  | 0.0181  | 0.0322  | 0.3316  | 0.2304  | 0.2803  | 0.1935  |
| PY07103 | 0.0357  | -0.131  | -0.0396 | -0.4606 | -0.4132 | -0.3226 | -0.0269 | 0.0656  | 0.1603  | 0.2462  | 0.3012  | 0.2373  |
| PY00804 | 0.042   | -0.1108 | 0.2336  | 0.5052  | -0.2772 | -0.4078 | -0.4499 | 0.3745  | -0.0122 | 0.457   | 0.1564  | -0.0793 |
| PY03558 | 0.3855  | 0.19    | -0.3699 | 0.6528  | 0.5981  | 0.261   | -0.2526 | -0.1581 | -0.2973 | -0.0225 | -0.5023 | -0.5035 |
| PY05679 | -0.0107 | 0.226   | 0.053   | 0.0365  | 0.4739  | -0.1282 | -0.2801 | -0.3318 | -0.3381 | -0.5433 | 0.4663  | -0.453  |
| PY02471 | 0.2916  | 0.3523  | 0.5861  | 1.2647  | 1.361   | 1.1382  | 0.2371  | 0.3263  | 0.0258  | 0.6982  | 0.6876  | -0.2154 |
| PY02411 | 0.3717  | 0.2829  | 0.4963  | 0.0543  | 0.1374  | 0.4436  | 0.5443  | -0.0449 | 0.247   | -0.1318 | -0.2859 | 0.3108  |
| PY02847 | -0.7144 | 0.0224  | 0.3644  | 0.2483  | 0.3037  | -0.0767 | -0.1075 | -0.0241 | -0.1146 | -0.0743 | 0.495   | -0.028  |
| PY02600 | 1.0778  | 0.4873  | 0.4406  | 0.2771  | 0.1945  | 0.4307  | 0.1744  | -0.2033 | -0.1058 | -0.1006 | -0.6474 | 0.1147  |
| PY06010 | -0.1018 | -0.4853 | -0.736  | -0.1061 | 0.3758  | -0.1032 | -0.2209 | 0.1786  | -0.1202 | 0.3362  | 0.4171  | -0.1261 |
| PY04896 | 0.5451  | 0.6192  | 0.8739  | 0.3126  | -0.1449 | 0.2974  | 0.3215  | -0.3715 | -0.1062 | -0.0978 | -0.7256 | -0.0326 |
| PY01759 | 0.0063  | 0.0969  | 0.1933  | 0.6587  | 0.4955  | 0.2065  | 0.0657  | 0.3604  | -0.5002 | 0.4445  | -0.167  | -0.7832 |
| PY00712 | -0.4518 | -0.0003 | -0.2797 | -0.0638 | -0.3372 | -0.3561 | -0.1404 | 0.3454  | -0.1272 | 0.4971  | 0.8679  | -0.0342 |
| PY03712 | -0.9088 | -0.354  | -0.6525 | 0.215   | 0.5347  | 0.0332  | -0.105  | 0.2292  | -0.2352 | -0.1328 | 0.2102  | -0.198  |
| PY05061 | 0.1086  | 0.3641  | 0.1195  | 0.3898  | -0.0899 | -0.2389 | -0.3041 | -0.0912 | -0.1431 | -0.0548 | -0.107  | -0.3094 |
| PY04278 | -0.4226 | -0.1566 | -0.3341 | 0.1652  | 0.2404  | 0.0777  | -0.0761 | -0.0109 | 0.0564  | 0.0628  | 0.0155  | -0.0402 |
| PY00359 | 0.4282  | -0.1094 | 0.3274  | 0.3368  | 0.3304  | 0.2035  | -0.0134 | -0.1086 | -0.1688 | -0.0163 | 0.0787  | 0.1647  |
| PY03081 | 0.4854  | 0.2341  | -0.0322 | 0.1684  | 0.1392  | -0.0906 | -0.0931 | -0.116  | -0.2607 | 0.1182  | -0.1149 | 0.0243  |
| PY05936 | 0.4075  | 0.512   | 0.9666  | -0.1287 | -0.3968 | 0.0916  | 0.3765  | 0.1029  | 0.3009  | -0.3246 | -0.323  | 0.1594  |
| PY03963 | 0.7212  | 0.3103  | -0.187  | 0.4827  | 0.4552  | 0.0425  | -0.0681 | -0.0008 | -0.2215 | -0.336  | 0.0737  | -0.3528 |
| PY01825 | 0.2445  | 0.1345  | -0.2516 | 0.0989  | -0.1554 | 0.1287  | -0.2001 | -0.3706 | -0.4013 | -0.6109 | -0.4601 | -0.4531 |
| PY02988 | 0.1013  | 0.0471  | -0.1334 | 0.6738  | 0.3122  | 0.3376  | 0.0366  | 0.1286  | -0.0396 | 0.2049  | -0.0287 | 0.2244  |
| PY07654 | -0.1791 | -0.4624 | -0.5942 | 0.182   | 0.1766  | -0.2751 | -0.2143 | 0.0362  | 0.1586  | 0.1311  | 0.2934  | 0.0206  |
| PY07124 | 0.2985  | 0.2276  | -0.0066 | 0.463   | -0.2354 | -0.1964 | 0.0537  | 0.2948  | 0.1324  | -1.2355 | 0.0758  | 0.0417  |
| PY05360 | -0.431  | -0.2493 | -0.0311 | -0.4574 | -0.4235 | -0.5387 | -0.1911 | -0.0629 | -0.0027 | -0.0971 | 0.1806  | -0.1172 |
| PY02880 | 0.0707  | -0.1682 | -0.0428 | -0.245  | 0.2953  | -0.0534 | 0.1175  | -0.622  | -0.3241 | -0.2134 | -0.2713 | -0.046  |
| PY03077 | -0.5241 | -0.4281 | -0.4576 | -0.3666 | -0.4099 | -0.2509 | 0.0279  | -0.1025 | -0.7681 | -0.3377 | -0.3535 | 0.0436  |
| PY00613 | 0.1043  | 0.0108  | -0.7571 | -0.1704 | -0.062  | -0.378  | 0.1726  | -0.001  | 0.46    | -0.0153 | -0.0535 | 0.2586  |
| PY01869 | 0.6075  | 0.6183  | 0.2957  | 0.6986  | -0.0797 | -0.0108 | 0.3309  | -0.0231 | 0.2786  | -0.1677 | -0.253  | 0.4621  |
| PY07682 | -0.6643 | 0.0453  | -0.2785 | -0.0204 | 0.4539  | 0.1103  | -0.0004 | -0.0699 | -0.088  | -0.0243 | -0.1179 | -0.2856 |
| PY04897 | -0.3297 | -0.4719 | -0.5706 | 1.6587  | 0.1643  | -0.2437 | 0.1412  | 0.5193  | -0.1121 | 0.1177  | 0.4577  | 0.0022  |
| PY00232 | -1.3081 | -0.2971 | -0.079  | -0.4879 | -0.6103 | -0.1332 | 0.1994  | 0.5885  | 0.1279  | -0.2723 | 0.0477  | -0.6067 |
| PY03013 | -0.4112 | -0.6302 | -0.4386 | 0.2649  | 0.0921  | -0.0836 | 0.0468  | 0.2887  | 0.4448  | 0.5355  | 1.2879  | 0.1228  |
| PY01529 | -0.4796 | -0.3553 | -0.0374 | 0.2231  | -0.1301 | 0.1591  | 0.1349  | 0.1928  | 0.1959  | 0.1086  | -0.11   | 0.022   |
| PY01671 | -1.0114 | -0.2266 | 0.0249  | -0.1087 | 0.2538  | 0.2812  | -0.1018 | 0.0825  | -0.0995 | 0.2547  | 0.0231  | -0.1674 |
| PY05227 | 0.4072  | 0.3482  | -0.2302 | 0.0935  | -0.133  | -0.1234 | -0.4236 | -0.2684 | -0.2193 | 0.206   | -0.079  | -0.2693 |
| PY01620 | 0.2979  | 0.415   | 0.2132  | -0.4162 | -0.0277 | 0.3433  | 0.2095  | -0.2242 | -0.029  | -0.3048 | -0.2171 | 0.1481  |
| PY02437 | 0.4537  | 0.1213  | -0.0362 | 0.2287  | 0.4258  | 0.2196  | -0.0788 | 0.0131  | 0.0406  | 0.3129  | 0.3521  | -0.1184 |
| PY01243 | -0.1158 | -0.0564 | 0.4112  | 0.29    | 0.165   | -0.0572 | 0.1201  | -0.2575 | -0.1611 | -0.0306 | -0.2471 | 0.3837  |
| PY05644 | -0.6351 | -0.2043 | -0.1784 | -0.5492 | -0.1222 | -0.1549 | -0.2198 | -0.2206 | -0.0294 | 0.0718  | 0.3365  | -0.1004 |
| PY06378 | -0.1788 | -0.0826 | -0.1221 | -0.0121 | -0.0148 | 0.216   | 0.1477  | 0.1041  | 0.3177  | 0.1578  | -0.0671 | 0.0547  |
| PY04124 | -0.7028 | -0.1753 | -0.1705 | -0.5559 | -0.6668 | -0.1383 | 0.2667  | 0.3129  | 0.0766  | -0.291  | 0.304   | -0.2856 |
| PY00526 | -0.104  | -0.1687 | -0.1014 | -0.1042 | 0.0335  | -0.0294 | -0.193  | -0.2145 | -0.1075 | -0.1534 | -0.2246 | -0.3638 |
| PY02793 | -0.134  | -0.1522 | -0.0717 | -0.086  | 0.1314  | 0.2806  | -0.0543 | -0.0119 | 0.0367  | -0.1242 | -0.0463 | 0.3031  |
| PY01830 | 0.0473  | -0.4832 | -0.2877 | 0.8535  | 0.2895  | 0.1185  | -0.2031 | 0.3756  | -0.8132 | 0.7474  | 1.1441  | 0.1478  |
| PY03059 | -0.679  | -0.0885 | -0.2237 | -0.225  | 0.3388  | -0.0076 | -0.188  | -0.0227 | -0.1816 | -0.1146 | 0.126   | -0.2275 |
| PY00782 | 0.2595  | 0.1355  | -0.0569 | -0.0032 | 0.0155  | 0.0096  | -0.3374 | -0.2703 | -0.5042 | -0.0521 | -0.0857 | -0.7908 |
| PY03088 | -0.398  | -0.1967 | -0.2089 | 0.0985  | -0.7989 | 0.0926  | -0.1812 | 0.3628  | 0.4164  | 0.6918  | 0.0916  | 0.3003  |
| PY05419 | 0.8373  | 0.4936  | 0.9356  | 0.0984  | -0.2229 | 0.1432  | 0.4223  | -0.1237 | 0.2374  | -0.1223 | -0.5154 | 0.4179  |
| PY07085 | 0.6255  | 0.1378  | 0.4332  | 0.0507  | 0.1212  | 0.0434  | 0.2208  | 0.1111  | 0.3395  | 0.0782  | 0.022   | 0.5006  |
| PY04874 | -0.2446 | 0.1194  | -0.0489 | -0.2114 | -0.0949 | -0.256  | -0.4669 | 0.0643  | -0.2271 | -0.2258 | -0.2901 | -0.8868 |
| PY01645 | 0.037   | -0.117  | -0.1809 | 0.4777  | 0.5032  | 0.1385  | 0.1641  | 0.3395  | -0.0338 | 0.2716  | 0.6169  | 0.258   |
| PY00251 | -0.072  | 0.1338  | 0.1738  | -0.5313 | -0.2263 | -0.112  | 0.4386  | -0.1498 | -0.1963 | -0.1152 | -0.2192 | -0.0777 |
| PY06937 | 0.1869  | 0.1373  | -0.0398 | -0.493  | 0.1331  | -0.0912 | -0.0791 | -0.1311 | -0.1282 | -0.0136 | -0.2768 | -0.1334 |
| PY02466 | -0.2597 | -0.0329 | 0       | -0.5288 | -0.3409 | -0.1161 | -0.2627 | -0.1673 | 0.1672  | -0.1058 | 0.3085  | 0.0833  |
| PY02723 | 0.4515  | -0.0673 | -0.0218 | 0.3582  | 0.0591  | 0.1634  | -0.0327 | 0.0342  | -0.173  | -0.1558 | -0.5369 | -0.2569 |
| PY05668 | 0.5855  | 0.5401  | 0.4754  | 0.535   | -0.2411 | 0.4211  | 0.6059  | 0.1503  | 0.316   | 0.3565  | -0.2004 | 0.1564  |
| PY00560 | -0.2482 | -0.2802 | -0.1444 | 0.2986  | 0.7215  | 0.0306  | -0.29   | -0.3438 | -0.3933 | -0.3917 | -0.3779 | -0.2823 |
| PY00960 | -0.2099 | -0.0015 | -0.2599 | 0.1335  | 0.2204  | 0.4739  | 0.272   | 0.1702  | -0.0932 | 0.2352  | 0.1481  | 0.3248  |
| PY01286 | 1.0139  | 0.4897  | -0.0385 | -0.0596 | -0.167  | -0.1449 | 0.2284  | -0.5148 | -0.1579 | -0.2898 | -0.3683 | 0.202   |
| PY04862 | 0.7312  | 0.3343  | 0.1837  | -0.6569 | 0.1194  | 0.322   | 0.2869  | -0.4433 | -0.162  | -0.1727 | -0.0683 | 0.2704  |
| PY05341 | -0.6679 | -0.1693 | 0.4202  | -1.1103 | -0.7247 | -0.1682 | -0.0415 | 0.0742  | 0.7387  | -0.3427 | 0.5531  | -0.4145 |
| PY00671 | 0.0111  | 0.2698  | -0.2121 | -0.6651 | -0.4274 | -0.1521 | -0.0243 | -0.1055 | 0.0289  | -0.641  | -0.2653 | -0.0188 |

|         |         |         |         |         |         |         |         |         |         |         |         |         |
|---------|---------|---------|---------|---------|---------|---------|---------|---------|---------|---------|---------|---------|
| PY03097 | -0.9516 | -0.0871 | 0.304   | -0.3545 | -0.1015 | -0.3181 | -0.1715 | -0.106  | -0.0632 | 0.1004  | 0.2857  | 0.0871  |
| PY03626 | 0.2632  | 0.2444  | 0.2747  | -0.2176 | -0.275  | -0.0069 | 0.1692  | 0.0402  | 0.2841  | -0.0153 | -0.1111 | 0.1014  |
| PY07186 | -0.0967 | 0.559   | 0.2958  | -0.0759 | -0.2227 | 0.1736  | 0.1815  | 0.3442  | 0.181   | 0.1312  | 0.0372  | -0.2257 |
| PY03369 | -0.3388 | 0.0869  | 0.4295  | -0.5825 | -0.5685 | -0.5261 | -0.1694 | -0.2922 | 0.1372  | -0.0719 | -0.0089 | -0.08   |
| PY00018 | 0.2027  | -0.0416 | -0.2336 | 0.3369  | 0.3935  | 0.0196  | 0.0145  | 0.1884  | 0.0973  | 0.3671  | 0.4447  | 0.3076  |
| PY03820 | 0.0657  | 0.2078  | 0.3934  | -0.5432 | -0.2556 | 0.0242  | 0.3496  | -0.1283 | 0.4472  | -0.4558 | -0.2596 | 0.3866  |
| PY02322 | 0.5453  | 0.7112  | 0.286   | -0.3016 | 0.6855  | -0.0283 | 0.0564  | 0.0838  | 0.1005  | -0.0763 | 0.1059  | -0.0677 |
| PY04456 | -0.0803 | -0.2055 | -0.0854 | 0.3219  | 0.4466  | 0.1733  | 0.0375  | 0.1136  | 0.0833  | 0.1133  | 0.191   | 0.2023  |
| PY06760 | -0.4135 | -0.1113 | -0.4285 | -0.5932 | -0.7499 | -0.1281 | -0.0637 | 0.2144  | 0.3154  | -0.5695 | -0.9726 | -0.5036 |
| PY02320 | -0.157  | -0.124  | 0.3495  | -0.6371 | 0.0012  | -0.176  | -0.101  | -0.0746 | 0.3004  | -0.0862 | 0.2522  | 0.0319  |
| PY06889 | -0.42   | -0.0448 | -0.0875 | -0.4025 | -0.02   | -0.3308 | -0.0148 | -0.1674 | -0.0422 | -0.158  | 0.1665  | 0.1314  |
| PY04687 | -0.8093 | -0.1194 | 0.1417  | -1.1066 | -0.2027 | 0.2385  | 0.2589  | -0.1441 | 0.0192  | -0.5829 | 0.1027  | 0.0659  |
| PY02877 | -0.6672 | -0.2745 | -0.17   | 0.1599  | -0.097  | -0.1689 | 0.1836  | 0.3367  | 0.3966  | 0.2061  | 0.294   | -0.0985 |
| PY06322 | -0.499  | 0.0101  | 0.1026  | -0.0635 | -0.5247 | 0.2273  | -0.0517 | -0.073  | -0.0353 | -0.0648 | 0.1672  | -0.0775 |
| PY01613 | -0.0964 | 0.0526  | -0.1805 | -0.1213 | -0.3854 | -0.2927 | -0.3614 | -0.3566 | -0.2619 | -0.4527 | 0.1386  | -0.2056 |
| PY05986 | 0.3074  | 0.2543  | 0.2404  | -0.2922 | -0.3519 | -0.2829 | 0.0881  | -0.1437 | 0.6006  | -0.2266 | -0.5971 | 0.02    |
| PY07344 | 0.7216  | 0.7028  | 0.2471  | 0.1105  | -0.0274 | 0.3722  | 0.6701  | -0.2979 | 0.3757  | -0.2304 | -0.3605 | 0.5973  |
| PY03497 | 0.3759  | 0.3992  | 0.2838  | 0.659   | 0.299   | 0.1418  | 0.2313  | 0.1769  | 0.3374  | 0.164   | 0.4831  | 0.3704  |
| PY03726 | 0.1361  | 0.1664  | 0.3726  | -0.5565 | -0.7251 | -0.0805 | -0.0925 | -0.3359 | 0.5243  | -0.285  | -0.8596 | 0.0692  |
| PY01637 | -0.4641 | 0.0417  | -0.0084 | -0.2258 | 0.7202  | -0.0129 | 0.1556  | 0.1093  | 0.1545  | -0.2037 | 0.0282  | -0.3336 |
| PY07033 | -0.2866 | -0.1035 | 0.0345  | -0.0768 | -0.2625 | 0.1295  | 0.2246  | 0.1592  | 0.0656  | 0.1418  | -0.5379 | -0.1208 |
| PY01701 | -0.2049 | -0.0209 | -0.1503 | -0.1545 | 0.0297  | -0.4764 | -0.474  | -0.1915 | -0.1176 | 0.0475  | 0.0669  | -0.2269 |
| PY06528 | -0.6431 | 0.1598  | 0.4229  | -0.5489 | -0.59   | -0.0074 | 0.1558  | 0.0267  | 0.2777  | -0.6033 | -0.1334 | 0.169   |
| PY04434 | 0.0679  | 0.0298  | -0.0193 | -0.5898 | -0.0958 | -0.1261 | -0.048  | -0.0942 | -0.496  | -0.2202 | -0.1485 | 0.1434  |
| PY05077 | -0.6967 | -0.0078 | -0.0316 | -0.3142 | 0.0528  | 0.0121  | -0.7502 | 0.2707  | 0.2291  | 0.0136  | 0.5801  | -0.0225 |
| PY06291 | 0.4843  | 0.1767  | 0.1899  | 0.1325  | -0.2561 | 0.0905  | -0.0716 | -0.0597 | -0.1115 | -0.4477 | -0.7369 | -0.0015 |
| PY03148 | 1.0116  | 0.4579  | 0.8254  | 0.0678  | -0.1766 | 0.0286  | 0.4494  | -0.215  | 0.3256  | 0.1528  | -0.3081 | 0.4438  |
| PY01204 | 0.6857  | 0.2331  | 0.1462  | 0.2368  | -0.0052 | -0.1165 | -0.0398 | -0.2684 | -0.2554 | -0.1322 | -0.4475 | -0.3968 |
| PY00538 | 0.4167  | 0.45    | 0.3344  | 0.0936  | -0.2905 | 0.1054  | 0.5462  | 0.0203  | 0.198   | 0.0524  | 0.0566  | 0.5813  |
| PY01170 | -0.0829 | 0.11    | -0.0722 | -0.2084 | -0.0583 | 0.2867  | 0.2537  | 0.089   | 0.1509  | -0.1773 | -0.2666 | -0.0983 |
| PY03732 | 0.077   | 0.2245  | 0.3282  | 0.0735  | 0.4366  | -0.035  | 0.0471  | -0.1874 | -0.2126 | 0.1924  | 0.1481  | 0.5518  |
| PY01031 | 0.319   | -0.0335 | 0.313   | 0.3355  | 0.1444  | -0.2153 | 0.0886  | 0.1043  | -0.0551 | 0.4773  | 0.0447  | 0.2968  |
| PY06977 | -0.3481 | -0.2447 | -0.0879 | 0.236   | 0.2348  | 0.1444  | -0.0551 | 0.2798  | 0.1877  | -0.0199 | -0.0226 | 0.0312  |
| PY03782 | -0.7436 | -0.4065 | -0.066  | -0.3361 | -0.4125 | -0.1127 | -0.0499 | 0.3683  | 0.2382  | 0.3371  | 0.5403  | 0.0725  |
| PY01004 | -0.7331 | -0.7778 | -0.473  | 1.2231  | 2.9847  | 0.1047  | 0.0762  | 0.4415  | 0.3317  | 1.3285  | 0.1136  | -0.103  |
| PY05464 | -0.5132 | -0.2049 | 0.003   | 0.7258  | 0.0279  | -0.3387 | -0.1552 | 0.1886  | 0.012   | 0.3311  | 0.5414  | 0.0609  |
| PY03618 | 0.4158  | 0.5107  | 0.6903  | 0.0386  | -0.3912 | -0.1323 | 0.1128  | -0.4391 | -0.022  | -0.1883 | -0.291  | 0.3428  |
| PY04406 | -0.5494 | -0.0446 | 0.0144  | -0.5986 | -0.4343 | -0.0926 | 0.0604  | 0.3825  | 0.5722  | 0.2126  | 0.4479  | -0.066  |
| PY00100 | -0.3479 | -0.3704 | -0.1968 | 0.5018  | 0.3585  | 0.1437  | -0.1364 | -0.1619 | -0.1054 | 0.4209  | 0.2592  | 0.2253  |
| PY00742 | 0.5838  | 0.0709  | 0.0111  | -0.2652 | -0.1753 | -0.2412 | 0.0448  | -0.1286 | 0.1332  | -0.0522 | 0.0629  | 0.4524  |
| PY02986 | 0.0777  | 0.0012  | -0.2505 | -0.2482 | 0.1072  | 0.0551  | -0.0656 | -0.1942 | -0.1013 | -0.16   | -0.2492 | 0.2001  |
| PY06215 | 0.426   | 0.0342  | -0.0866 | -0.7686 | 0.1761  | 0.0906  | -0.037  | -0.1874 | -0.2243 | -0.1641 | -0.1913 | -0.2133 |
| PY07446 | 0.0446  | -0.0423 | -0.1653 | -0.4321 | -0.312  | -0.0248 | -0.141  | -0.0756 | 0.0041  | -0.1343 | -0.4467 | -0.0455 |
| PY05264 | 0.0206  | 0.1054  | -0.2548 | -0.1187 | 0.0294  | -0.2128 | 0.0019  | -0.0211 | 0.1111  | 0.1009  | 0.1592  | 0.0627  |
| PY02535 | 0.2724  | 0.1106  | -0.0262 | 0.6593  | 0.5325  | 0.5221  | -0.136  | 0.0246  | -0.5244 | 0.527   | 0.0873  | -0.4122 |
| PY06199 | -0.5733 | -0.192  | 0.0112  | -0.8092 | -0.1275 | -0.1283 | 0.1924  | -0.2823 | 0.5769  | -0.4124 | 0.0345  | 0.2065  |
| PY02443 | 0.2382  | 0.3491  | 0.2795  | 0.1761  | -0.1459 | 0.1504  | 0.0933  | -0.0081 | 0.1121  | -0.1341 | -0.6585 | 0.1314  |
| PY06752 | -0.3901 | -0.267  | -0.2839 | 0.8267  | 0.1581  | 0.0705  | 0.0364  | 0.609   | 0.3147  | 0.0028  | 0.7109  | 0.1123  |
| PY01450 | 0.0642  | -0.0353 | 0.0962  | -0.3019 | 0.2136  | 0.3564  | 0.3646  | 0.1379  | -0.0208 | -0.0209 | -0.2481 | -0.1153 |
| PY01228 | 0.2698  | 0.2357  | 0.4648  | 0.768   | -0.0125 | 0.1338  | 0.1575  | 0.0827  | -0.0346 | 0.2735  | -0.4205 | 0.0273  |
| PY06169 | 0.0491  | -0.0031 | -0.2513 | 0.3785  | 0.9409  | 0.5742  | 0.0512  | 0.5138  | -0.0805 | 0.5075  | 0.9612  | 0.0585  |
| PY06955 | 0.2419  | -0.2666 | -0.2609 | -0.1959 | -0.2083 | -0.5197 | -0.1481 | 0.2659  | 0.4289  | 0.1098  | -0.1095 | -0.3759 |
| PY01250 | -0.0673 | 0.054   | -0.7743 | 0.3833  | 0.6859  | 0.2012  | 0.2199  | 0.0219  | 0.0556  | 0.2055  | 0.3838  | 0.663   |
| PY07660 | -0.6272 | -0.4863 | -0.1013 | -0.4457 | -0.1748 | 0.2187  | 0.1547  | 0.4884  | 0.1735  | -0.3261 | 0.1058  | -0.4485 |
| PY05600 | -0.6748 | -0.3967 | -0.5085 | -1.0393 | -0.3474 | 0.0254  | -0.1457 | 0.2825  | 0.2628  | 0.2373  | 0.745   | 0.2442  |
| PY00042 | -0.2927 | -0.0531 | -0.1932 | 0.2424  | -0.3211 | 0.3558  | 0.1214  | 0.415   | -0.1235 | 0.2438  | -0.1691 | -0.1759 |
| PY04210 | 0.006   | 0.0296  | 0.2613  | 0.1684  | 0.0395  | 0.0291  | -0.0759 | -0.2667 | -0.1925 | -0.043  | -0.08   | 0.0389  |
| PY01889 | -0.3194 | -0.0134 | -0.3299 | -0.4908 | -0.3997 | -0.3437 | -0.0508 | 0.0034  | 0.3345  | 0.3402  | 0.2374  | -0.052  |
| PY03176 | -0.384  | -0.2752 | -0.5826 | -0.3823 | -0.0208 | -0.2884 | -0.2245 | -0.0661 | -0.3713 | -0.0077 | -0.0731 | 0.004   |
| PY05387 | -0.5215 | 0.1624  | 0.2886  | 0.2826  | -0.4009 | -0.2211 | 0.1351  | 0.0901  | 0.3802  | 0.1233  | 0.0378  | -0.1818 |
| PY03000 | 0.1224  | -0.1166 | -0.1958 | -0.1787 | 0.0152  | -0.0116 | 0.0297  | -0.3014 | -0.0845 | -0.2038 | -0.3006 | 0.153   |
| PY05788 | -0.1972 | -0.2696 | -0.2212 | 0.2397  | -0.0092 | -0.1506 | -0.1367 | -0.0047 | 0.1451  | 0.0328  | -0.2292 | -0.3871 |
| PY00947 | -0.035  | -0.1977 | -0.1142 | 0.3976  | 0.1787  | 0.0839  | -0.2123 | 0.2159  | -0.3533 | 0.1422  | -0.0315 | -0.4226 |

|         |         |         |         |         |         |         |         |         |         |         |         |         |
|---------|---------|---------|---------|---------|---------|---------|---------|---------|---------|---------|---------|---------|
| PY06128 | 0.2494  | -0.0345 | -0.0092 | -0.3135 | -0.2686 | -0.0309 | 0.0069  | 0.0691  | 0.0544  | 0.0172  | -0.0712 | 0.3252  |
| PY01066 | 0.0903  | 0.3282  | 0.1052  | -0.6068 | -0.5426 | -0.1163 | 0.1901  | -0.2245 | 0.3165  | -0.7896 | -0.2969 | 0.1645  |
| PY04350 | -0.465  | -0.5248 | -0.3607 | -0.0472 | -0.3841 | 0.0635  | -0.4847 | 0.3049  | 0.2268  | 0.1158  | 0.505   | -0.1051 |
| PY01550 | -0.6185 | -0.0999 | 0.5382  | -0.3731 | -0.0786 | 0.1729  | 0.0801  | 0.2577  | 0.0666  | -0.2683 | 0.6294  | -0.371  |
| PY07125 | 0.3605  | 0.204   | 0.0016  | 0.2672  | -1.5347 | 0.0842  | -0.1742 | -0.0027 | 0.0961  | -1.0081 | -0.211  | -0.1291 |
| PY05063 | 0.4094  | 0.2725  | 0.2167  | 0.5587  | 0.0083  | -0.0639 | 0.0341  | -0.2519 | -0.1227 | -0.1033 | -0.4691 | 0.1739  |
| PY04547 | 0.5366  | 0.5496  | 0.9319  | 0.7017  | -0.0027 | 0.1683  | 0.1696  | -0.259  | -0.0661 | -0.3463 | -0.7838 | -0.0486 |
| PY06934 | 0.3574  | 0.1297  | 0.0073  | 0.48    | 0.4405  | 0.1573  | -0.1219 | 0.0639  | 0.1307  | 0.7365  | -1.7592 | 0.0425  |
| PY05085 | 0.7378  | 0.0148  | 0.5906  | 0.2935  | 0.1259  | -0.0107 | 0.3482  | 0.0292  | -0.0536 | -0.2196 | 0.0517  | 0.0438  |
| PY06104 | -0.3357 | 0.0005  | -0.1816 | -0.2322 | 0.0967  | -0.0066 | -0.1267 | 0.1746  | 0.1986  | 0.2315  | 0.298   | -0.2349 |
| PY03828 | 0.2061  | 0.0118  | -0.2573 | 0.9074  | 0.5196  | 0.2886  | -0.1263 | 0.216   | 0.1261  | 0.0769  | 0.669   | -0.1817 |
| PY04313 | -0.6704 | -0.0636 | -0.2175 | -0.0778 | -0.2095 | -0.1097 | 0.0114  | 0.4054  | 0.2124  | 0.3321  | 0.2727  | -0.0709 |
| PY05531 | -0.2474 | 0.0222  | 0.1784  | -0.4631 | -0.3832 | -0.0898 | 0.007   | 0.1906  | 0.291   | -0.2867 | -0.1208 | 0.2814  |
| PY02786 | -0.4328 | 0.0608  | 0.1586  | 0.1124  | -0.0226 | 0.2337  | 0.2222  | 0.3579  | 0.1357  | 0.22    | 0.0755  | 0.3352  |
| PY04889 | 0.3839  | 0.2347  | 0.6221  | -0.0132 | -0.375  | 0.0703  | 0.3511  | -0.2475 | 0.282   | 0.0467  | -0.5367 | 0.4175  |
| PY07474 | 0.3834  | 0.074   | -0.0609 | -0.0754 | -0.0528 | -0.2407 | -0.2837 | 0.2838  | -0.0312 | -0.3124 | -0.2052 | -0.4838 |
| PY04598 | -0.9233 | 0.173   | -0.2113 | 0.0471  | 0.1856  | -0.2788 | 0.0447  | 0.2101  | -0.1949 | -0.0432 | 0.1394  | -0.6151 |
| PY06562 | -0.691  | -0.7909 | -1.0333 | -0.4049 | 0.293   | -0.0497 | 0.052   | 0.6432  | 0.3015  | 0.2727  | 0.3797  | -0.2295 |
| PY00514 | 0.478   | 0.4321  | 0.5248  | 0.4942  | -0.19   | 0.0945  | -0.0348 | -0.3917 | -0.1566 | -0.3376 | -0.4824 | -0.2067 |
| PY02848 | -0.6952 | -0.1476 | -0.202  | -0.4944 | -0.1294 | -0.547  | -0.1949 | 0.1592  | 0.0117  | 0.1967  | 0.5839  | 0.2141  |
| PY01986 | 0.9523  | 0.4474  | 0.4015  | 0.1517  | -0.3336 | -0.1287 | 0.1651  | -0.1781 | 0.1425  | -0.3111 | -0.6151 | 0.4863  |
| PY05348 | -0.0866 | 0.0837  | 0.0965  | -0.9268 | -0.4467 | -0.2865 | -0.1724 | -0.3593 | -0.033  | -0.3822 | 0.1954  | -0.3097 |
| PY04373 | -0.9927 | -0.2265 | 0.3344  | -0.8701 | -0.4836 | -0.1394 | -0.3275 | -0.1544 | -0.1091 | -0.4294 | 0.0933  | -0.4537 |
| PY04355 | -0.7779 | 0.1509  | -0.0146 | 0.0439  | 0.0074  | 0.7391  | 0.2709  | -0.0191 | 0.0038  | 0.0518  | -0.0124 | -0.5603 |
| PY06944 | 0.008   | -0.0441 | -0.0564 | -0.3573 | 0.0905  | -0.2849 | 0.0961  | 0.1941  | 0.6193  | -0.1287 | 0.4074  | 0.7392  |
| PY02470 | 0.3805  | -0.0554 | 0.3848  | -0.6358 | 0.4792  | 0.1224  | 0.1595  | -0.3422 | 0.0177  | -0.4243 | -0.2574 | 0.1108  |
| PY02749 | -0.6834 | -0.0104 | 0.0835  | -0.0477 | 0.1929  | -0.0086 | -0.1385 | -0.0327 | -0.1775 | -0.0769 | -0.0262 | -0.0493 |
| PY05471 | -0.3446 | -0.3113 | -0.0344 | 1.1459  | 0.4452  | 0.1617  | -0.1891 | 0.3174  | -0.1212 | 0.6127  | 0.218   | -0.1427 |
| PY03708 | -0.9173 | -0.407  | -0.1095 | -0.3711 | -0.095  | 0.0473  | -0.0834 | -0.0444 | 0.0185  | -0.0395 | 0.0397  | -0.1132 |
| PY05857 | -0.2845 | -0.3616 | -0.0591 | -0.6649 | 0.2838  | -0.2494 | -0.3314 | -0.2854 | -0.3878 | -0.0532 | 0.0997  | -0.1225 |
| PY03961 | 0.0461  | -0.046  | 0.198   | 0.0796  | -0.1364 | 0.0092  | 0.0376  | -0.0692 | 0.0368  | 0.1894  | -0.0159 | 0.1489  |
| PY00888 | -0.88   | -0.5513 | -0.5737 | -0.3094 | -0.159  | -0.1207 | -0.2647 | 0.1193  | -0.3656 | 0.128   | 0.2012  | 0.0019  |
| PY00851 | -0.5106 | -0.4516 | -0.3073 | 0.7198  | 0.4216  | 0.102   | -0.0204 | -0.0027 | -0.8128 | 0.5649  | -0.1057 | -0.7871 |
| PY05501 | -0.4853 | -0.2627 | 0.2444  | 0.2869  | -0.1207 | -0.2769 | -0.2614 | -0.0334 | -0.0103 | -0.1462 | 0.1914  | -0.1137 |
| PY06699 | -0.1302 | -0.2988 | -0.2734 | -0.4054 | 0.1556  | -0.0291 | 0.0751  | -0.2326 | 0.4607  | 0.1296  | 0.0063  | 0.2896  |
| PY00945 | 0.8403  | 0.2987  | 0.3213  | 0.2961  | 0.1376  | 0.1853  | 0.4843  | 0.2321  | 0.2813  | 0.4229  | -0.1076 | 0.715   |
| PY00914 | -0.3678 | -0.0653 | -0.1381 | -0.002  | 0.1398  | 0.2352  | 0.1743  | 0.1796  | -0.1637 | 0.1576  | -0.106  | 0.1867  |
| PY01705 | 0.138   | -0.0926 | -0.1092 | 1.1277  | 0.3054  | 0.0732  | 0.0552  | -0.1358 | 0.2812  | 0.1948  | 0.0634  | 0.2888  |
| PY00478 | -0.1282 | -0.1749 | 0.045   | 0.8345  | 1.2283  | 0.4735  | -0.0507 | 0.3625  | -0.0019 | 0.6227  | 0.836   | 0.2135  |
| PY06961 | 0.0776  | -0.1059 | -0.2428 | 0.2523  | 0.1548  | -0.1929 | -0.0695 | -0.2002 | 0.008   | -0.1422 | -0.2857 | -0.0382 |
| PY01920 | 0.5557  | 0.3299  | 0.6723  | 0.3294  | 0.008   | -0.0199 | 0.0749  | -0.0348 | -0.14   | 0.3507  | -0.149  | -0.0014 |
| PY04444 | -0.4272 | -0.1934 | -0.0134 | 0.5504  | 0.466   | -0.0015 | 0.0873  | 0.1274  | -0.3598 | 0.3998  | 0.3344  | -0.1193 |
| PY07131 | -0.8755 | -0.7945 | -0.5013 | 0.0214  | -0.1354 | -0.18   | 0.1737  | 0.3677  | 0.4187  | 0.319   | 0.637   | 0.1354  |
| PY02953 | -0.2889 | -0.197  | -0.1389 | 0.4854  | 0.2209  | -0.5015 | -0.3732 | -0.3175 | -0.0593 | 0.0439  | 0.4815  | 0.2025  |
| PY01409 | 0.1269  | 0.3272  | 0.668   | 0.3629  | 0.2407  | 0.1318  | 0.1019  | 0.3112  | 0.1843  | 0.624   | -0.3103 | -0.1629 |
| PY03430 | -0.1472 | 0.1259  | 0.1714  | -0.0156 | -0.0477 | -0.0505 | -0.1817 | 0.0738  | -0.1702 | -0.0484 | 0.0341  | -0.0465 |
| PY04045 | -0.1043 | 0.0326  | 0.0572  | 0.291   | 0.1662  | -0.0227 | -0.3244 | 0.0252  | -0.1705 | 0.1238  | -0.0694 | -0.3405 |
| PY05756 | 0.4432  | 0.3056  | 0.5184  | 0.0603  | -0.0326 | 0.1125  | 0.0458  | -0.0924 | -0.3963 | 0.0104  | -0.3562 | -0.2188 |
| PY06289 | 0.4187  | 0.2209  | 0.1979  | 0.3915  | 0.6996  | 0.0658  | -0.067  | 0.0381  | -0.3937 | 0.3336  | 0.2537  | 0.0297  |
| PY06849 | -0.6023 | -0.4227 | -0.1727 | -0.3683 | -0.4937 | 0.1595  | 0.3583  | 0.5681  | 0.4124  | 0.5627  | 0.5     | 0.3915  |
| PY04849 | -0.3492 | 0.1087  | -0.0723 | 0.8845  | 0.3868  | 0.0478  | 0.0282  | 0.4714  | 0.1256  | 0.2934  | 0.2724  | -0.2573 |
| PY02645 | -0.5496 | 0.1098  | 0.2102  | -0.4566 | -0.2608 | 0.3284  | 0.3018  | 0.3589  | 0.441   | -0.3478 | 0.2184  | -0.2319 |
| PY00379 | -1.5595 | -0.5776 | 0       | -1.6656 | -1.61   | -0.9414 | -0.3903 | -0.0739 | 0.2373  | -0.3358 | 0.7181  | -0.2978 |
| PY07439 | -0.9254 | -0.1732 | -0.5636 | -0.3008 | -0.2705 | 0.0347  | -0.315  | 0.2522  | -0.0499 | 0.2143  | 0.144   | -0.1928 |
| PY07631 | -0.7838 | -0.4036 | -0.5989 | 0.1288  | -0.1056 | -0.1051 | -0.4156 | 0.0511  | -0.1404 | 0.1664  | -0.0803 | -0.0061 |
| PY01497 | -0.0148 | -0.0406 | 0.2396  | 0.1428  | 0.2575  | -0.2717 | -0.0673 | -0.1657 | 0.0391  | -0.2292 | 0.2745  | 0.0033  |
| PY00873 | 0.2553  | 0.1718  | 0.025   | 0.255   | 0.1178  | -0.0713 | -0.3568 | -0.1587 | -0.3169 | 0.0821  | -0.266  | -0.2893 |
| PY06902 | -0.2754 | 0.4831  | 0.5747  | 0.0366  | 0.0144  | 0.1506  | 0.2183  | 0.3344  | 0.2877  | 0.489   | 0.8927  | 0.2617  |
| PY03476 | 0.0871  | -0.0631 | 0.5543  | 0.1515  | 0.096   | 0.3804  | 0.3383  | 0.5165  | 0.5815  | 0.1101  | -0.2302 | -0.149  |
| PY06948 | 0.0233  | -0.3127 | -0.2587 | -0.2414 | 0.1077  | -0.0328 | -0.1141 | 0.021   | 0.0044  | -0.2056 | 0.2107  | 0.2101  |
| PY03552 | 0.418   | 0.5938  | 0.1161  | -0.5545 | -0.8835 | -0.3018 | 0.4141  | 0.0393  | 0.3518  | 0.0177  | -0.2882 | 0.3964  |
| PY01501 | 0.7166  | 0.4401  | 0.0265  | -0.0493 | -0.2895 | 2.2633  | 0.6261  | 0.234   | 0.4243  | -0.1129 | -0.1998 | 0.3493  |
| PY05578 | -0.0336 | 0.0452  | 0.2503  | -0.185  | 0.3058  | 0.1603  | -0.0062 | -0.0933 | -0.2712 | -0.1458 | -0.0013 | -0.0828 |

|         |         |         |         |         |         |         |         |         |         |         |         |         |
|---------|---------|---------|---------|---------|---------|---------|---------|---------|---------|---------|---------|---------|
| PY05730 | 0.5095  | 0.6056  | 1.1379  | 0.1852  | -0.9191 | 0.4198  | 0.5047  | -0.0847 | 0.2728  | -0.2835 | -0.9084 | -0.1798 |
| PY02205 | 0.0936  | 0.1196  | -0.1252 | -0.1002 | 0.2092  | -0.2948 | 0.0311  | -0.1114 | -0.1052 | -0.02   | -0.1555 | -0.1303 |
| PY04617 | 0.1854  | 0.2285  | -0.0397 | -0.2013 | -0.2086 | -0.5255 | -0.1919 | -0.0726 | -0.1224 | -0.0597 | 0.2393  | -0.3517 |
| PY03644 | -0.0938 | -0.237  | -0.451  | -0.0835 | -0.2378 | -0.0117 | -0.1704 | -0.2148 | -0.2617 | -0.0667 | -0.4764 | -0.1897 |
| PY03941 | -0.8326 | -0.5814 | -0.1895 | -0.1606 | 0.4126  | -0.1055 | -0.1178 | 0.2606  | 0.2666  | 0.4509  | 0.7862  | 0.2484  |
| PY01030 | 0.2535  | 0.2329  | 0.188   | 0.6578  | 0.605   | -0.0372 | 0.1853  | 0.0889  | 0.0386  | -0.0112 | 0.3548  | 0.2077  |
| PY00871 | 0.6746  | 0.2276  | 0.0107  | 0.5091  | 0.9221  | 0.3249  | 0.2329  | 0.2231  | 0.1245  | 0.2578  | 0.9761  | 0.338   |
| PY04078 | -0.2267 | -0.4804 | -0.7519 | -0.0114 | 0.2201  | -0.1692 | -0.2596 | 0.2129  | -0.1156 | 0.1263  | 0.5818  | 0.0863  |
| PY06007 | 0.4419  | 0.004   | -0.0206 | -0.0306 | 0.0247  | -0.1655 | -0.1192 | -0.1918 | -0.1106 | -0.1029 | -0.2019 | 0.1009  |
| PY03619 | 0.409   | 0.08    | -0.2553 | 0.252   | -0.8051 | -0.402  | -0.0841 | 0.5624  | 0.0332  | -0.4455 | 0.1002  | 0.1531  |
| PY00806 | -0.1915 | -0.3334 | -0.4596 | 0.4608  | 0.6579  | 0.2145  | 0.0229  | 0.0892  | -0.2766 | 0.01    | 0.0976  | -0.0497 |
| PY07254 | 0.0474  | 0.1203  | 0.2476  | -0.4275 | -0.3422 | -0.013  | 0.3965  | -0.0705 | 0.1108  | 0.1245  | -0.2405 | 0.1771  |
| PY04354 | -0.398  | -0.5608 | -0.4195 | -0.1518 | -0.2956 | -0.2049 | -0.2027 | 0.2827  | 0.2964  | 0.3321  | 0.4346  | 0.6738  |
| PY00615 | 0.7681  | 0.4968  | 0.3265  | 0.4519  | -0.0817 | 0.2051  | 0.0743  | -0.0355 | -0.1096 | -0.3775 | -0.6381 | -0.3037 |
| PY00840 | -1.6728 | -0.4051 | -0.5263 | -0.3026 | -0.1962 | -0.2352 | -0.2604 | 0.3422  | -0.0821 | -0.2904 | 0.7915  | -0.1202 |
| PY06290 | -0.5448 | -0.0831 | 0.6613  | -0.4112 | -0.3945 | -0.3904 | -0.212  | -0.0966 | 0.1752  | 0.3705  | 0.29    | 0.0926  |
| PY01727 | 0.2792  | 0.0802  | 0.0928  | 0.1945  | -0.0695 | 0.2443  | 0.0978  | 0.0939  | -0.0027 | -0.0504 | -0.0002 | -0.2294 |
| PY04676 | -0.5314 | -0.1497 | -0.0883 | -0.263  | -0.4767 | -0.3341 | -0.234  | 0.1345  | 0.0904  | 0.0309  | 0.6513  | 0.1043  |
| PY05686 | 1.1146  | 0.3488  | -0.0775 | 0.08    | -0.5886 | -0.1862 | 0.1861  | 0.4416  | 0.4715  | 0.2138  | -0.4207 | 0.2927  |
| PY03406 | -0.4668 | -0.0421 | 0.5068  | 0.1169  | -0.2807 | -0.0763 | -0.0491 | -0.0148 | 0.0127  | 0.1093  | 0.0371  | 0.1492  |
| PY04077 | -0.855  | -0.2856 | -0.2859 | -0.3541 | -0.0288 | -0.6326 | 0.0174  | 0.5433  | 0.5437  | 0.4034  | 0.4082  | 0.1827  |
| PY04718 | -0.1918 | -0.3267 | -0.114  | 0.1827  | 0.127   | 0.0513  | 0.1078  | 0.0264  | -0.0725 | 0.1773  | 0.4632  | -0.0253 |
| PY06949 | -0.6034 | -0.4804 | -0.6921 | -0.5239 | 0.4281  | -0.2014 | -0.1281 | 0.4986  | 0.1004  | 0.0829  | 0.0605  | -0.2169 |
| PY05201 | 0.1214  | 0.1698  | 0.472   | 0.3112  | -0.0209 | 0.05    | -0.0087 | 0.0205  | -0.0294 | 0.071   | -0.1543 | 0.4181  |
| PY04748 | -0.1614 | 0.1396  | 0.2079  | 0.4627  | -0.1426 | 0.1064  | 0.3155  | 0.2569  | 0.2736  | 0.1822  | 0.1626  | -0.0308 |
| PY05051 | -0.0562 | -0.0296 | 0.6308  | 0.3027  | -0.0086 | 0.0399  | -0.1926 | -0.2107 | -0.1026 | -0.1811 | -0.3882 | -0.2008 |
| PY03189 | 0.0205  | -0.0519 | -0.3616 | -0.2336 | 0.0477  | 0.1573  | 0.005   | -0.0852 | -0.0779 | -0.3343 | -0.0289 | -0.0314 |
| PY06551 | -0.2572 | -0.0651 | -0.3464 | -0.1726 | -0.1001 | -0.155  | -0.2748 | -0.071  | -0.0428 | -0.1369 | 0.1873  | -0.3918 |
| PY06621 | 0.048   | -0.2231 | -0.0222 | -0.1266 | 0.3161  | 0.0547  | -0.0416 | 0.0963  | 0.0705  | 0.096   | 0.3628  | -0.0353 |
| PY03173 | 0.7431  | 0.5149  | 0.2592  | 0.3982  | 0.0257  | -0.0855 | 0.4889  | 0.2055  | 0.3185  | -0.7304 | 0.0401  | 0.345   |
| PY01626 | 0.3093  | 0.0218  | 0.1169  | -0.7189 | -0.0647 | 0.1691  | 0.146   | -0.1989 | 0.0525  | -0.0053 | -0.2102 | 0.3526  |
| PY04957 | -0.434  | -0.202  | -0.067  | 0.2288  | 0.157   | 0.1138  | -0.2287 | -0.278  | -0.3559 | -0.1099 | 0.146   | -0.4118 |
| PY04852 | -0.3896 | -0.2619 | -0.0923 | 0.158   | 0.8531  | 0.3562  | 0.0984  | -0.0245 | -0.3398 | 0.1939  | 0.3561  | -0.0185 |
| PY00093 | 0.2653  | 0.1469  | 0.0332  | 0.6891  | 0.5464  | -0.1092 | -0.3392 | -0.5106 | -0.4356 | -0.2368 | -0.5395 | -0.3848 |
| PY01293 | -0.937  | -0.4068 | -0.016  | 0.2099  | 0.1659  | 0.1204  | -0.0629 | 0.0558  | 0.1487  | 0.009   | -0.1223 | -0.1073 |
| PY00834 | 0.7545  | 0.8834  | 0.7749  | 0.5747  | -0.0492 | -0.2921 | 0.3882  | 0.136   | 0.298   | -0.1    | -0.0038 | 0.445   |
| PY06387 | -1.1479 | -0.1154 | 0.1627  | -0.339  | 0.5344  | 0.402   | 0.271   | 0.3429  | 0.2776  | -0.3232 | 0.5696  | 0.0938  |
| PY06532 | -0.1115 | -0.1198 | -0.4881 | -0.6576 | -0.3769 | -0.3195 | -0.0465 | -0.2217 | 0.1081  | -0.1407 | 0.162   | -0.0378 |
| PY06346 | 1.0475  | 0.8444  | 1.0415  | -0.1073 | -0.7152 | 0.1241  | 1.2501  | 0.1706  | 0.689   | 0.1762  | -0.6196 | 0.9173  |
| PY00080 | 0.5175  | 0.264   | -0.4222 | 0.4092  | -0.0801 | 0.2703  | 0.1668  | -0.0402 | 0.0863  | 0.3562  | -0.2557 | 0.4319  |
| PY03508 | -0.4533 | 0.0292  | -0.2327 | -0.7038 | -0.6236 | 0.0589  | -0.1378 | 0.0247  | -0.0107 | 0.0839  | 0.1296  | 0.0227  |
| PY02272 | -0.008  | -0.0081 | 0.0483  | -0.3034 | 0.3249  | 0.2051  | 0.0386  | -0.029  | -0.2832 | -0.3713 | -0.1935 | 0.2622  |
| PY00685 | 0.1641  | 0.343   | 0.6293  | -0.2848 | -0.0756 | 0.2858  | 0.6263  | 0.2626  | 0.252   | -0.0238 | -0.4558 | 0.1255  |
| PY00518 | -0.0017 | -0.7352 | -0.077  | 0.5772  | 0.3463  | 0.1124  | -0.1083 | 0.0951  | -0.4728 | 0.3601  | 0.0164  | 0.1006  |
| PY00693 | -0.1857 | -0.2001 | -0.4136 | 0.3939  | 0.3535  | -0.1051 | -0.2056 | 0.0202  | -0.1669 | 0.3269  | 0.4162  | -0.0792 |
| PY01465 | -0.4473 | -0.4658 | -0.6115 | -0.0617 | -0.0703 | -0.2965 | 0.0997  | 0.2111  | 0.3097  | -0.0188 | 0.1875  | 0.2078  |
| PY00317 | -0.2626 | -0.0834 | -0.1045 | -0.3351 | -0.0596 | -0.2124 | 0.1062  | 0.3922  | 0.4541  | -0.0532 | 0.321   | -0.0568 |
| PY05266 | 0.0998  | 0.0199  | 0.2128  | 0.0868  | -0.2715 | -0.0961 | 0.0604  | 0.3512  | 0.3273  | 0.5307  | -0.2925 | 0.2493  |
| PY05182 | 0.0849  | -0.4191 | -0.1166 | 0.004   | -0.0098 | -0.2402 | -0.1808 | -0.2067 | -0.3398 | -0.1184 | 0.0114  | 0.2457  |
| PY01700 | -0.4186 | -0.0883 | 0.0424  | -0.0433 | 0.0382  | -0.1341 | -0.1135 | 0.294   | 0.1843  | 0.3355  | 0.7416  | -0.2205 |
| PY04905 | 0.031   | -0.2045 | -0.1509 | 0.2022  | -0.1116 | 0.0859  | 0.0927  | 0.0796  | -0.0369 | -0.0347 | 0.0439  | 0.2397  |
| PY01606 | 0.1347  | 0.4356  | 0.085   | -0.1655 | -0.1963 | 0.3705  | 0.0886  | 0.0173  | 0.1449  | -0.1359 | -0.2559 | 0.1729  |
| PY00422 | -0.1206 | 0.1485  | 0.323   | 0.1439  | -0.3761 | 0.3465  | 0.0877  | -0.1827 | -0.0055 | -0.4583 | -0.0359 | 0.2163  |
| PY01116 | -0.7679 | -0.0524 | 0.1418  | -0.5565 | -0.5084 | 0.3703  | 0.1982  | 0.2082  | 0.1216  | -0.0044 | 0.2036  | -0.2314 |
| PY04090 | 0.2803  | 0.2994  | 0.4388  | -0.0346 | -0.2231 | 0.1642  | 0.3463  | -0.0129 | 0.1961  | -0.4044 | -0.4977 | 0.2177  |
| PY01765 | -0.6184 | -0.4984 | -0.4698 | 0.059   | 0.4346  | 0.2096  | -0.1939 | 0.4905  | -0.1535 | 0.3135  | 0.7754  | -0.1671 |
| PY02556 | 0.0893  | -0.0636 | -0.2377 | 1.9895  | 0.6831  | 0.079   | -0.3727 | 0.7293  | -0.486  | 0.4777  | 0.4488  | -0.0618 |
| PY05096 | 0.2373  | 0.1468  | -0.049  | 0.358   | -0.3424 | 0.2305  | 0.1798  | 0.2357  | 0.4386  | 0.0697  | -0.3889 | 0.2003  |
| PY02740 | -0.5135 | 0.1419  | 0.2398  | 0.3331  | 0.0322  | -0.0558 | -0.0754 | 0.2435  | 0.0163  | -0.0907 | 0.7636  | -0.2795 |
| PY03755 | 0.6503  | 0.1752  | 0.0784  | -0.4695 | -0.0294 | 0.1986  | -0.0266 | -0.4562 | -0.2694 | 0.0348  | -0.5751 | -0.021  |
| PY06966 | 0.3684  | 0.3818  | 0.0606  | -0.1019 | -0.1894 | -0.2107 | -0.1586 | -0.4788 | -0.1044 | -0.2798 | -0.5166 | -0.1457 |
| PY02171 | 0.5416  | 0.5215  | 0.8536  | -0.4034 | -0.0927 | -0.2004 | 0.3688  | -0.1645 | 0.3037  | 0.003   | -0.2322 | 0.5626  |
| PY05573 | -0.7216 | 0.1341  | 0.1237  | 0.2658  | -0.3112 | 0.3745  | -0.0005 | 0.051   | -0.0101 | 0.0508  | -0.2683 | 0.1886  |

|         |         |         |         |         |         |         |         |         |         |         |         |         |
|---------|---------|---------|---------|---------|---------|---------|---------|---------|---------|---------|---------|---------|
| PY03776 | -0.0488 | -0.1944 | -0.0676 | 0.7776  | 0.6117  | 0.1021  | -0.1733 | -0.1655 | -0.1785 | 0.3688  | -0.0901 | 0.0467  |
| PY06487 | 0.1672  | 0.2994  | 0.3061  | 0.2198  | -1.7127 | 0.0952  | -0.007  | 0.1614  | 0.4061  | -0.7194 | -0.3153 | 0.2492  |
| PY01882 | -0.4233 | -0.2979 | -0.2408 | -0.2993 | -0.2111 | -0.1142 | -0.707  | -0.0062 | 0.091   | -0.0566 | -0.1407 | 0.0328  |
| PY00536 | 1.1793  | 0.9442  | 1.0666  | -0.0175 | -0.7343 | -0.0278 | 0.5416  | -0.4246 | 0.3195  | -0.3584 | -0.8968 | 0.4377  |
| PY01255 | 0.6463  | 0.145   | 0.1832  | -0.1207 | -0.0879 | -0.0428 | 0.1469  | -0.3027 | 0.1165  | -0.3414 | -0.0887 | 0.2292  |
| PY02017 | 0.0749  | -0.1437 | -0.3529 | -0.2967 | 0.2924  | -0.1769 | -0.2984 | -0.3273 | 0.0449  | -0.1099 | 0.091   | -0.3052 |
| PY07520 | -0.1258 | 0.1113  | 0.481   | -0.4071 | -0.457  | 0.0751  | 0.0359  | -0.0868 | 0.2353  | 0.1005  | -0.2788 | -0.0293 |
| PY01717 | -0.8705 | -0.2225 | 0.0488  | -0.4719 | -0.9945 | -0.3795 | -0.1632 | -0.7167 | 0.2667  | -0.5933 | 0.0483  | -0.1139 |
| PY05632 | 1.5721  | 0.9115  | 1.3311  | 0.0838  | -0.4305 | 0.044   | 0.6509  | -0.1091 | 0.9408  | 0.2885  | -0.8214 | 0.7477  |
| PY02852 | 0.6552  | 0.3224  | 0.3579  | -0.0573 | 0.204   | 0.3154  | 0.6538  | 0.1967  | 0.3414  | -0.0043 | -0.3302 | 0.4411  |
| PY04389 | 0.0145  | 0.1045  | 0.5508  | -0.1243 | -0.3713 | 0.2359  | 0.3583  | 0.0382  | 0.3797  | -0.0157 | -0.1918 | 0.2209  |
| PY01472 | 0.647   | 0.2033  | -0.2411 | 0.5797  | 0.307   | -0.0429 | 0.16    | 0.0417  | -0.1803 | 0.2339  | 0.7775  | 0.2172  |
| PY00744 | -0.5057 | -0.8199 | -0.657  | 0.2821  | -0.105  | -0.0776 | -0.0474 | 0.0531  | -0.2355 | -0.3846 | 0.3542  | -0.0396 |
| PY05739 | -0.3901 | 0.0837  | -0.0545 | -0.8319 | -0.8015 | -0.1221 | 0.1225  | -0.4561 | 0.2991  | -0.1548 | -0.404  | 0.0791  |
| PY04490 | 0.3851  | 0.3066  | 0.2812  | 0.1995  | -0.3031 | 0.152   | 0.0597  | -0.0868 | 0.1955  | 0.1998  | 0.36    | 0.1118  |
| PY05552 | -0.74   | -0.2278 | -0.2102 | -0.4045 | -0.1253 | -0.4351 | -0.4693 | 0.1228  | -0.0608 | 0.1686  | 0.589   | -0.3411 |
| PY03512 | -0.6509 | 0.0258  | 0.3152  | -0.0642 | -0.3581 | -0.2093 | 0.022   | 0.0107  | 0.2194  | -0.2245 | 0.3994  | -0.3353 |
| PY02624 | -0.3636 | 0.0096  | -0.3961 | 1.4547  | 0.3486  | 0.1816  | 0.3514  | 0.8154  | 0.2232  | -0.124  | -0.1401 | -0.012  |
| PY03185 | -0.32   | 0.1795  | -0.2655 | -0.269  | -0.6615 | -0.1518 | 0.0742  | 0.1417  | 0.538   | 0.4459  | 0.3622  | 0.5787  |
| PY01911 | 0.0453  | -0.1272 | 0.2283  | 0.7226  | 0.1989  | 0.1522  | -0.2836 | 0.356   | -0.1594 | 1.2569  | 0.2568  | -0.2128 |
| PY01138 | -0.874  | -0.2712 | 0.0099  | 0.1737  | -0.2314 | -0.204  | -0.0486 | 0.6703  | 0.2005  | -0.233  | 0.264   | -0.5057 |
| PY01024 | 0.792   | 0.427   | 0.2079  | 0.9166  | -0.0392 | 0.1353  | -0.0719 | -0.3912 | -0.1978 | -0.5512 | -0.7819 | -0.24   |
| PY05211 | -0.395  | -0.3075 | 0.3015  | 0.4962  | -0.1279 | 0.3104  | 0.2192  | -0.3828 | -0.2772 | -0.4786 | -0.5283 | -0.4896 |
| PY02591 | -0.0937 | -0.0482 | 0.0598  | -0.0495 | -0.2038 | -0.0526 | -0.6134 | -0.0108 | 0.0506  | 0.1068  | -0.1936 | -0.0465 |
| PY01667 | -0.0714 | -0.2434 | -0.4904 | 0.5107  | -0.1764 | -0.3089 | 0.1339  | 0.1237  | -0.2875 | 0.6923  | 0.2913  | -0.0188 |
| PY00293 | 0.1495  | 0.0273  | -0.3519 | -0.0553 | 0.235   | 0.4925  | 0.2948  | -0.006  | -0.1853 | 0.0042  | -0.2857 | -0.2385 |
| PY06601 | -0.1708 | -0.0591 | -0.1132 | -0.1261 | 0.0326  | 0.3083  | 0.1635  | 0.1389  | 0.1822  | 0.2571  | 0.0516  | 0.1648  |
| PY01909 | -0.1023 | -0.0736 | -0.5073 | -0.0688 | 0.4866  | 0.021   | -0.1958 | -0.31   | -0.4105 | -0.2479 | -0.5416 | 0.0072  |
| PY01559 | -0.4446 | -0.094  | -0.1563 | 0.1738  | 0.0492  | 0.111   | 0.1988  | 0.2953  | -0.0134 | -0.0756 | 0.025   | -0.1315 |
| PY02843 | -0.4965 | -0.1247 | 0.0483  | -0.2682 | -0.1245 | -0.0017 | -0.0805 | 0.4179  | 0.2116  | 0.0305  | 0.3923  | -0.1411 |
| PY07340 | -0.9975 | -0.7868 | -0.7522 | -0.3058 | -0.1956 | -0.3187 | -0.3351 | 0.0678  | 0.0999  | 0.1175  | 0.7138  | 0.2084  |
| PY04704 | -0.2478 | 0.1269  | 0.5635  | -0.1213 | -0.1088 | 0.0136  | 0.331   | 0.1997  | 0.3543  | -0.2503 | 0.463   | -0.1255 |
| PY07449 | 0.6     | 0.0896  | 0.048   | 0.1018  | 0.0243  | -0.1672 | -0.0485 | -0.2279 | 0.1813  | -0.0625 | -0.2449 | 0.2174  |
| PY00107 | -0.7071 | -0.259  | 0.4558  | 0.0757  | -0.274  | -0.2851 | -0.0922 | 0.0342  | 0.075   | -0.4537 | 0.5179  | -0.1282 |
| PY06575 | 0.4021  | 0.2499  | -0.0703 | 0.2146  | -0.4612 | -0.1223 | -0.0914 | 0.4231  | 0.3809  | -0.3908 | 0.1779  | 0.0396  |
| PY01278 | 0.4108  | 0.2417  | -0.1161 | 0.2967  | 0.8638  | 0.2043  | 0.0272  | 0.0877  | 0.0358  | -0.1074 | 2.6778  | 0.206   |
| PY02391 | -0.8332 | -0.0268 | 0.1042  | -0.118  | -0.2398 | -0.3026 | 0.0972  | 0.7582  | 0.3223  | -0.1282 | 1.0737  | -0.3372 |
| PY02400 | -1.0047 | -0.79   | -0.1724 | 0.0239  | 0.7718  | 0.4064  | -0.0112 | 0.1283  | -0.4054 | -0.0528 | 0.2686  | -0.4825 |
| PY01275 | -0.3475 | -0.0015 | -0.1535 | -0.1088 | -0.2964 | 0.4196  | 0.1116  | 0.3533  | -0.2345 | -0.4648 | -0.3513 | -0.9608 |
| PY05410 | 0.0964  | 0.2369  | 0.0288  | -0.1886 | -0.397  | -0.3065 | 0.0953  | 0.0628  | 0.1846  | -1.1346 | -0.3219 | 0.104   |
| PY05520 | -0.4845 | -0.537  | -0.0647 | -0.4833 | -0.3944 | -0.2693 | -0.1625 | -0.3945 | 0.2886  | 0.1684  | -0.051  | 0.2404  |
| PY05184 | -0.0055 | 0.0424  | 0.2694  | -0.2977 | -0.2201 | 0.1905  | 0.4192  | 0.1616  | 0.1155  | -0.4589 | -0.6332 | 0.0821  |
| PY05878 | -0.1328 | -0.2166 | -0.2176 | -0.4251 | -0.1348 | -0.4849 | -0.271  | -0.3783 | -0.2046 | -0.1312 | 0.0643  | -0.0941 |
| PY01760 | -0.4603 | -0.0201 | 0.3113  | 0.5321  | -0.5388 | -0.4844 | -0.2658 | -0.0484 | 0.0806  | 0.3194  | 0.3836  | -0.3001 |
| PY07678 | -0.1499 | -0.128  | -0.0705 | -1.0306 | -0.5748 | -0.2674 | 0.2414  | 0.0864  | 0.2591  | -0.0562 | 0.1513  | 0.0209  |
| PY04376 | -0.6821 | -0.2845 | -0.2884 | 0.1334  | 0.5535  | -0.3168 | -0.1725 | -0.1059 | -0.3029 | -0.1176 | 0.4224  | -0.1882 |
| PY04348 | -0.8031 | -0.3747 | -0.6709 | -0.4967 | 0.4111  | -0.1556 | -0.1646 | -0.2319 | -0.1981 | -0.108  | 0.1316  | -0.0484 |
| PY00630 | 0.0256  | -0.0524 | 0.0223  | -0.3509 | -0.2133 | -0.041  | -0.0271 | 0.058   | 0.1238  | 0.0193  | 0.0131  | 0.1286  |
| PY06464 | 0.6229  | 0.1396  | 0.3678  | 0.0102  | 0.2535  | -0.1243 | 0.2245  | -0.19   | 0.086   | -0.436  | 0.0197  | 0.3422  |
| PY01077 | -0.4351 | -0.3831 | -0.4612 | -0.4135 | 0.0321  | -0.1537 | -0.1561 | 0.0507  | -0.1238 | 0.0265  | 0.1118  | -0.0744 |
| PY01268 | -0.289  | -0.2564 | 0.2252  | -0.3876 | -0.5169 | 0.0439  | -0.2466 | 0.2559  | 0.5489  | 0.1743  | 0.057   | 0.1734  |
| PY07447 | -0.5978 | -0.1839 | 0.0807  | 0.0321  | -0.2917 | -0.2316 | -0.1501 | 0.1561  | 0.3392  | -0.0761 | 1.5448  | -0.361  |
| PY05103 | 0.5877  | 0.2666  | 0.4365  | -0.131  | -0.1633 | -0.0101 | 0.3574  | -0.1095 | 0.1662  | -0.1509 | -0.3462 | 0.3152  |
| PY02282 | -0.2199 | -0.52   | -0.4657 | -0.0967 | 0.0031  | 0.1284  | 0.1184  | 0.2299  | 0.3494  | 0.1113  | 0.2012  | 0.1666  |
| PY02779 | -0.4656 | -0.3057 | -0.0848 | -0.304  | -0.2467 | -0.3564 | -0.3829 | -0.1066 | -0.0898 | -0.2976 | 0.1509  | -0.054  |
| PY06960 | -0.4671 | -0.6673 | -0.6079 | -0.7619 | -0.337  | -0.8859 | -0.6803 | -0.8889 | -0.5472 | -0.967  | -0.7529 | -0.5082 |
| PY07260 | 0.1264  | -0.0097 | -0.0208 | 0.4443  | 0.2859  | -0.0139 | -0.1008 | -0.3387 | -0.2861 | -0.2163 | -0.4547 | 0.0065  |
| PY02009 | 0.5     | 0.3462  | 0.0667  | -0.0443 | -0.1248 | -0.2016 | -0.3825 | -0.1558 | -0.3272 | 0.1683  | -0.0133 | 0.0857  |
| PY06110 | 0.016   | 0.1573  | 0.078   | 0.5005  | 0.2539  | 0.1218  | 0.0575  | -0.1917 | -0.0097 | -0.0062 | -0.0544 | -0.0492 |
| PY04725 | -1.0671 | -0.1541 | 0.2283  | -0.291  | 0.1336  | -0.0408 | -0.0504 | 0.1141  | -0.1429 | -0.3168 | 0.3161  | -0.372  |
| PY01100 | -0.0141 | -0.4907 | -0.5688 | -0.2132 | -0.1968 | -0.0075 | -0.1434 | 0.2298  | -0.4245 | -0.0801 | 0.1009  | -0.5636 |
| PY00225 | -0.8734 | -0.2763 | -0.2609 | 0.0629  | 0.1072  | 0.0524  | -0.0417 | 0.0726  | -0.2412 | 0.2249  | 0.4036  | -0.2082 |
| PY07465 | 0.0845  | 0.101   | 0.3034  | -0.611  | -0.2632 | -0.4402 | -0.3041 | -0.0883 | 0.5609  | -0.0933 | 0.6733  | -0.1882 |

|         |         |         |         |         |         |         |         |         |         |         |         |         |
|---------|---------|---------|---------|---------|---------|---------|---------|---------|---------|---------|---------|---------|
| PY01899 | -0.6118 | -0.1366 | -0.1158 | -0.1861 | -0.2576 | -0.0962 | -0.0469 | 0.1849  | 0.1632  | 0.542   | 0.074   | -0.0978 |
| PY00319 | -0.6593 | -0.7105 | -0.7539 | -0.8675 | -0.8083 | -0.4269 | -0.6478 | -0.7487 | -0.4201 | 0.0748  | -0.7263 | -0.6743 |
| PY03361 | 0.5504  | 0.1726  | 0.4015  | 0.2023  | -0.0977 | 0.2009  | 0.32    | 0.053   | 0.2105  | 0.1763  | -0.537  | 0.3937  |
| PY02379 | -0.2907 | -0.0049 | -0.8888 | -0.998  | -0.4151 | -0.3723 | -0.3064 | 0.2052  | 0.0942  | 0.1934  | 0.3137  | -0.1936 |
| PY05238 | -0.0052 | 0.2209  | 0.2021  | 0.7477  | 0.4292  | -0.0059 | -0.2827 | -0.0585 | -0.2657 | -0.677  | 0.0535  | -0.4055 |
| PY06624 | -0.0322 | -0.2173 | -0.0796 | 0.2724  | 0.1103  | 0.071   | 0.223   | 0.1824  | -0.0552 | 0.3849  | 0.616   | -0.0186 |
| PY04224 | 0.3426  | 0.1935  | -0.006  | 0.1485  | 0.1651  | 0.0571  | 0.119   | -0.2618 | 0.1437  | 0.1672  | -0.3778 | 0.4673  |
| PY05038 | -1.3186 | -0.9832 | -0.7952 | -0.8582 | -0.648  | -0.349  | -0.1848 | 0.5032  | 0.2312  | 0.4794  | 0.1812  | 0.0781  |
| PY00480 | -1.038  | -0.0912 | -0.5568 | -0.2373 | 0.3258  | 0.1208  | 0.0861  | -0.0807 | -0.2143 | 0.0772  | 0.5167  | 0.182   |
| PY06177 | -0.5483 | -0.2004 | 0.4565  | 0.0385  | -1.0016 | -0.4412 | -0.2223 | 0.1129  | 0.1573  | 0.1284  | -0.4605 | -0.4333 |
| PY01537 | 0.0715  | -0.0143 | -0.0339 | -0.2186 | 0.2406  | 0.1324  | 0.0081  | -0.3446 | -0.1943 | -0.4314 | -0.0548 | 0.2257  |
| PY01133 | 0.5473  | 0.0394  | -0.5116 | 0.2505  | -0.0843 | 0.0716  | -0.2809 | 0.3103  | -0.0262 | 0.3275  | -0.4643 | 0.002   |
| PY01699 | -0.5481 | -0.5607 | -0.4526 | -0.741  | 0.3936  | 0.1389  | -0.2087 | -0.1598 | -0.3502 | -0.0943 | -0.1978 | 0.1291  |
| PY04047 | -0.2578 | -0.339  | -0.1656 | 0.2734  | 0.2471  | 0.0275  | -0.1438 | 0.2435  | -0.4211 | 0.3568  | 0.3342  | 0.2314  |
| PY00482 | 1.0426  | 0.748   | 0.8204  | 0.48    | -0.3854 | 0.1342  | 0.3536  | -0.3693 | 0.2537  | -0.1965 | -0.9107 | 0.6063  |
| PY03636 | 0.7886  | 0.1909  | 0.1462  | 0.1191  | 0.6219  | 0.378   | 0.4304  | 0.188   | 0.0793  | 0.212   | 0.3449  | 0.4765  |
| PY03893 | 0.5099  | 0.1349  | 0.2676  | -0.609  | -0.2121 | -0.2035 | 0.1989  | -0.2872 | -0.1518 | -0.3505 | 0.0114  | 0.2777  |
| PY05977 | 0.037   | 0.0983  | -0.2157 | 0.0596  | -0.1182 | -0.1155 | -0.0328 | 0.1187  | 0.179   | -0.4694 | -0.3593 | 0.1784  |
| PY07223 | -0.0631 | -0.2781 | 0.1116  | 0       | -0.0461 | 0.0014  | 0.2303  | -0.3127 | -0.5324 | -0.0538 | -0.3334 | -0.2289 |
| PY00113 | -0.1897 | -0.0167 | -0.1401 | -0.2537 | -0.3678 | 0.1353  | 0.2242  | 0.0669  | 0.3074  | -0.0847 | -0.0903 | -0.3462 |
| PY01047 | 0.2055  | -0.1626 | -0.4451 | 0.1979  | 0.1135  | 0.0039  | -0.1464 | 0.0608  | -0.1977 | 0.3061  | -0.1978 | -0.1398 |
| PY02529 | -0.0677 | -0.0995 | -0.3054 | 0.1966  | -0.0411 | -0.2965 | -0.1358 | 0.1162  | -0.1511 | 0.1927  | 0.3506  | 0.2079  |
| PY07172 | -0.1018 | -0.3616 | -0.5842 | 0.0708  | 0.4593  | 0.193   | 0.201   | 0.1067  | -0.0993 | 0.0206  | -0.2149 | 0.4311  |
| PY03353 | 0.3969  | -0.1536 | -0.5084 | 0.3257  | -0.0329 | -0.1013 | -0.2029 | -0.2179 | -0.3386 | -0.1672 | -0.2999 | 0.1841  |
| PY06882 | 0.1987  | 0.1299  | -0.2013 | 0.1448  | 0.2398  | 0.2652  | -0.1078 | -0.2382 | -0.2103 | -0.23   | -0.3468 | -0.207  |
| PY06828 | -0.1161 | -0.3172 | -0.3414 | -0.0154 | -0.5454 | -0.1859 | 0.3715  | 0.2966  | 0.5357  | -0.0104 | -0.0017 | 0.61    |
| PY03591 | -0.724  | -0.2552 | -0.5479 | -0.3898 | 0.1377  | -0.4161 | -0.3345 | 0.0985  | -0.0931 | 0.1189  | 0.6669  | -0.1577 |
| PY07203 | 0.1715  | 0.0233  | 0.01    | -0.4692 | -0.044  | -0.0989 | 0.0132  | -0.2025 | -0.0338 | -0.0997 | 0.1202  | -0.0477 |
| PY00023 | 0.4709  | 0.1643  | 0.3741  | 0.1684  | -0.1581 | -0.0764 | 0.0335  | -0.1606 | -0.0734 | -0.0013 | -0.4433 | 0.2897  |
| PY03253 | 0.317   | 0.0253  | 0.0717  | -0.6801 | 0.1014  | 0.0313  | 0.0029  | -0.3711 | -0.2035 | -0.4372 | -0.1561 | 0.025   |
| PY04368 | 0.3885  | 0.0541  | 0.5272  | 0.0425  | 1.6183  | 0.2093  | 0.0017  | -0.2538 | -0.1269 | -0.073  | -0.1241 | 0.1003  |
| PY05248 | -0.1796 | 0.0437  | 0.062   | -0.6091 | -0.0642 | 0.1033  | 0.0494  | 0.2013  | 0.2495  | -0.3    | 0.0238  | 0.1406  |
| PY01283 | 0.1155  | -0.0668 | -0.1002 | -0.0091 | 0.2352  | -0.0425 | -0.2781 | -0.0922 | -0.0998 | -0.1024 | 0.0861  | -0.0417 |
| PY02991 | -1.5473 | -0.494  | 0.0276  | -0.6748 | -0.3543 | -0.2414 | -0.0382 | 0.0441  | 0.5634  | -0.2969 | 0.5791  | -0.0333 |
| PY03692 | 0.478   | 0.2601  | -0.0983 | 0.2396  | 0.0753  | 0.0124  | -0.0314 | 0.0432  | 0.1394  | 0.2716  | -0.0028 | 0.3422  |
| PY03139 | -0.4409 | -0.0015 | 0.0069  | -0.8205 | -0.5816 | -0.117  | 0.0762  | 0.1052  | 0.3643  | 0.0174  | -0.1495 | -0.6945 |
| PY03938 | -2.1554 | -0.6877 | -0.197  | -1.184  | -0.9251 | -0.7774 | -0.2337 | 0.5609  | 0.4522  | -0.362  | 0.9419  | -0.4373 |
| PY04059 | -0.0353 | -0.0002 | 0.0325  | -0.2293 | 0.0445  | -0.0712 | -0.0259 | -0.4021 | -0.143  | -0.3534 | -0.3183 | -0.0176 |
| PY02481 | -0.7617 | -0.3365 | -0.0542 | 0.0064  | 0.1706  | 0.0753  | -0.1    | -0.1484 | -0.1427 | -0.0424 | 0.016   | 0.0293  |
| PY02057 | 0.3986  | 0.0958  | 0.2715  | 0.0319  | -0.3621 | -0.1211 | 0.5362  | 0.0346  | 0.5997  | 0.4173  | -0.118  | 0.604   |
| PY03063 | -0.1408 | 0.1344  | 0.1575  | -0.4113 | 0.3728  | 0.2866  | 0.0561  | -0.0203 | -0.165  | 0.3773  | 0.6083  | 0.0854  |
| PY07184 | 1.0943  | 0.7541  | 0.3605  | 0.035   | -0.1312 | 0.2422  | 0.3557  | -0.3643 | 0.168   | -0.184  | -0.7999 | 0.4169  |
| PY02331 | -0.3492 | -0.0409 | -0.2564 | -0.121  | -0.3948 | -0.6919 | -0.4021 | -0.0262 | -0.0318 | 0.0851  | 0.5698  | -0.396  |
| PY03528 | 0.4881  | 0.607   | 0.6211  | 0.0217  | -0.1942 | 0.0623  | 0.2083  | 0.0393  | 0.2446  | -0.0648 | -0.4946 | 0.1665  |
| PY03641 | 0.3813  | -0.0333 | -0.1403 | 0.3334  | 0.3445  | -0.0844 | -0.0542 | -0.0328 | 0.0039  | 0.0646  | 0.0018  | 0.3025  |
| PY00637 | -0.0338 | -0.2926 | -0.167  | 0.0637  | 0.4153  | 0.155   | 0.0236  | 0.1167  | 0.1593  | -0.1246 | 0.3531  | 0.3414  |
| PY05886 | -0.7102 | 0.0688  | -0.1465 | -0.1199 | 0.2276  | 0.0671  | -0.1951 | -0.0163 | -0.1416 | -0.0574 | -0.2023 | -0.2101 |
| PY04933 | -0.7243 | -0.4846 | -0.1064 | -0.3323 | -0.0643 | 0.0998  | 0.1394  | 0.305   | 0.1863  | -0.2531 | 0.3993  | -0.2079 |
| PY00628 | 0.3785  | 0.0323  | 0.0224  | -0.3827 | -0.2096 | 0.2787  | -0.0294 | -0.2154 | -0.0724 | -0.0914 | -0.3595 | 0.052   |
| PY04267 | 0.2511  | 0.0223  | 0.0703  | 0.004   | 0.4416  | 0.2319  | -0.0021 | 0.003   | 0.1567  | 0.073   | 0.5288  | 0.0828  |
| PY05527 | -0.1715 | -0.2528 | 0.1282  | -0.1899 | -0.4878 | 0.2945  | 0.0991  | -0.065  | 0.1515  | -0.2292 | -0.5064 | 0.2655  |
| PY04916 | -0.5355 | -1.0583 | -1.2042 | -1.1588 | -0.8222 | -0.9177 | -0.5831 | -0.1726 | 0.6491  | 0.3395  | 0.7318  | 1.1937  |
| PY05920 | -1.1625 | -1.1861 | -0.5299 | -0.2038 | -0.1214 | -0.0124 | -0.0363 | -0.0119 | 0.5345  | -0.0667 | 0.3765  | 0.1183  |
| PY02095 | -0.0603 | -0.0332 | 0.2436  | -0.7466 | 0.03    | -0.1795 | 0.0032  | -0.1109 | -0.0389 | -0.4345 | -0.1203 | 0.0573  |
| PY05932 | 0.0787  | 0.0391  | 0.2824  | -0.9666 | -0.3366 | -0.0166 | -0.0353 | -0.3286 | 0.1242  | -0.5148 | -0.4207 | 0.1618  |
| PY06999 | 0.2325  | 0.0621  | -0.17   | 0.0215  | 0.5123  | 0.1525  | -0.1477 | 0.007   | 0.1442  | -0.2038 | 0.0598  | 0.1192  |
| PY00910 | -0.3263 | -0.3271 | 0.1398  | 0.1928  | 0.2536  | 0.0569  | 0.2332  | 0.1498  | 0.2365  | 0.4933  | 0.4423  | -0.265  |
| PY00007 | 0.0492  | -0.0114 | -0.1275 | 0.1053  | -0.1284 | 0.2692  | -0.0844 | -0.1163 | 0.0827  | 0.0331  | -0.1226 | -0.1353 |
| PY00487 | 0.0015  | -0.0805 | -0.0302 | -0.2996 | -0.1827 | 0.2496  | 0.2494  | -0.2381 | 0.075   | -0.3086 | -0.3361 | 0.1714  |
| PY01800 | 0.3803  | 0.1942  | -0.3719 | 0.3841  | 0.5297  | 0.9107  | -0.0506 | 0.2477  | 0.0359  | 0.6606  | 0.5223  | 0.1642  |
| PY05192 | -0.2912 | -0.3835 | -0.1502 | 0.312   | -0.1143 | -0.3799 | -0.1891 | -0.078  | -1.0519 | -0.6439 | -0.508  | -0.4627 |
| PY00585 | -0.4612 | -0.4928 | -0.5372 | 0.1408  | -0.3884 | -0.3319 | -0.3476 | 0.5043  | 0.0857  | 0.4746  | -0.1971 | -0.1592 |
| PY06392 | 0.402   | 0.3936  | -0.2903 | -0.0769 | 0.0806  | -0.1788 | -0.0879 | 0.1308  | -0.0651 | 0.2167  | -0.0745 | 0.1253  |

|         |         |         |         |         |         |         |         |         |         |         |         |         |
|---------|---------|---------|---------|---------|---------|---------|---------|---------|---------|---------|---------|---------|
| PY03495 | -0.5761 | -0.0797 | 0.0161  | -1.1963 | -0.362  | -0.243  | 0.009   | 0.0724  | 0.2831  | -0.2662 | 0.3665  | 0.0005  |
| PY03108 | -0.1144 | -0.1606 | -0.1139 | -0.273  | 0.1178  | -0.1774 | -0.3575 | -0.268  | -0.1941 | 0.1652  | -0.2318 | 0.1328  |
| PY06243 | 0.1865  | 0.0174  | 0.2225  | -0.1325 | -0.1354 | 0.2747  | -0.2933 | 0.0107  | -0.1332 | -0.0881 | -0.4043 | -0.1161 |
| PY03687 | -0.5304 | 0.191   | 0.1414  | -0.0944 | 0.0783  | 0.0436  | -0.0536 | 0.3647  | 0.1436  | 0.5522  | 0.6618  | -0.1826 |
| PY04391 | 0.2298  | -0.0505 | 0.3431  | 0.0489  | -0.1107 | 0.2099  | 0.1256  | -0.3146 | -0.0757 | -0.2614 | -0.5528 | 0.1174  |
| PY00545 | 0.2582  | 0.3065  | 0.6003  | 0.335   | 0.1274  | 0.4451  | 0.4154  | -0.122  | 0.036   | 0.1265  | -0.9902 | 0.3671  |
| PY02325 | 0.4376  | 0.5539  | 0.0096  | -0.0677 | -0.2997 | 0.0108  | 0.0685  | -0.1359 | 0.1829  | 0.1228  | -0.6062 | 0.3289  |
| PY04708 | 0.1335  | -0.0899 | -0.2281 | 0.1531  | 0.1669  | 0.2589  | 0.2969  | 0.1971  | 0.1594  | 0.2754  | #####   | 0.2929  |
| PY01618 | -0.8414 | -0.1625 | -0.0495 | -0.5278 | -0.2003 | 0.0235  | -0.1893 | 0.0751  | -0.0661 | 0.0459  | 0.0279  | -0.2836 |
| PY01786 | -0.0127 | -0.2823 | -0.6714 | 0.1415  | -0.021  | -0.0624 | -0.2117 | 0.2095  | 0.2686  | 0.1225  | 0.2847  | -0.021  |
| PY02086 | -0.3175 | -0.1531 | -0.034  | 0.9069  | 0.5979  | -0.0235 | 0.2126  | 0.2081  | 0.18    | 0.3545  | 0.2031  | 0.0071  |
| PY02347 | 0.8141  | 0.3621  | 0.4556  | 0.0569  | -0.3704 | -0.014  | 0.0983  | 0.0626  | 0.2902  | 0.2816  | -0.4523 | 0.3479  |
| PY01563 | -0.77   | -0.959  | -0.9998 | -0.8995 | -0.171  | -0.1879 | -0.0622 | 0.2694  | 0.2651  | 0.3245  | 0.6473  | -0.1293 |
| PY06672 | -0.5465 | -0.0931 | 0.4281  | 0.3729  | -0.1726 | 0.0641  | 0.2813  | 0.1157  | -1.4205 | 0.0493  | -0.357  | -0.833  |
| PY02616 | -1.3139 | -0.4451 | -0.4069 | -0.5677 | -0.5402 | -0.3614 | -0.2785 | 0.3043  | 0.0847  | -0.3038 | 0.1533  | -0.5952 |
| PY01778 | 0.1705  | 0.3522  | 0.9945  | 0.3865  | 0.2227  | -0.1827 | 0.613   | 0.2284  | 0.5421  | 0.459   | -0.0303 | 1.1996  |
| PY03310 | 0.8233  | 0.2823  | 0.1971  | -0.3641 | -0.2476 | 0.3688  | 0.3985  | -0.2853 | 0.2249  | -0.4851 | -0.3632 | 0.4936  |
| PY07062 | -0.7758 | -0.1579 | -0.3012 | 0.3943  | -0.6119 | -0.1343 | -0.3203 | 0.4042  | 0.3853  | 0.2892  | 0.2998  | 0.0422  |
| PY06781 | 0.2943  | -0.0383 | -0.0889 | -0.091  | -0.148  | 0.1807  | 0.4615  | 0.0729  | 0.2962  | 0.2831  | -0.2333 | 0.5713  |
| PY06687 | -0.2775 | -0.2692 | -0.0564 | -0.4954 | 0.2453  | -0.0194 | 0.4304  | -0.1276 | -0.5325 | -0.8612 | -0.6933 | -1.3414 |
| PY01393 | -0.3507 | 0.04    | -0.3653 | 0.3912  | -0.7741 | -0.5778 | -0.4814 | -0.0034 | -0.1469 | 0.1677  | 0.4321  | -0.1188 |
| PY01694 | 0.391   | -0.0003 | 0.0634  | -0.742  | -0.1036 | -0.0123 | 0.3282  | -0.0024 | -0.2663 | -0.2813 | -0.253  | -0.3941 |
| PY06973 | 0.6169  | 0.4815  | 0.7444  | 0.3784  | 0.3231  | 0.0155  | 0.2019  | 0.0366  | 0.1008  | 0.6595  | -0.164  | -0.0771 |
| PY00405 | 0.0075  | 0.0785  | 0.4635  | -0.08   | 0.2323  | -0.0934 | -0.2252 | -0.3282 | -0.3415 | -0.3543 | -0.3174 | -0.3153 |
| PY06444 | 0.0844  | 0.0612  | -0.0319 | 0.5526  | -0.0886 | -0.2753 | -0.1377 | 0.0782  | -0.0524 | 0.7129  | -0.2775 | -0.3811 |
| PY04717 | -0.109  | -0.2207 | -0.3113 | 0.1121  | 0.4188  | -0.0874 | -0.1116 | 0.0872  | -0.1758 | 0.1138  | 0.1408  | 0.0905  |
| PY00125 | -0.4403 | -0.1509 | -0.1999 | 0.0933  | -0.0574 | -0.0291 | -0.1297 | 0.0928  | -0.1706 | 0.1014  | -0.3738 | 0.0807  |
| PY00727 | -0.3387 | -0.3648 | -0.2926 | 0.0137  | 0.4163  | -0.2035 | -0.2911 | -0.2695 | -0.357  | 0.1308  | 0.1469  | -0.0538 |
| PY00167 | -0.1553 | -0.111  | -0.0492 | -0.0873 | -0.1692 | -0.0143 | -0.2334 | 0.2086  | 0.0905  | -0.0676 | 0.474   | 0.0643  |
| PY04590 | -0.2198 | 0.024   | -0.1411 | 0.1766  | 0.1031  | 0.0606  | -0.1742 | 0.0844  | -0.2442 | 0.0384  | -0.0368 | -0.1428 |
| PY07119 | -0.1692 | -0.4084 | 0.2654  | 0.6478  | 0.3625  | 0.1761  | 0.1345  | -0.2396 | -1.1958 | -0.2236 | -0.0413 | 0.2448  |
| PY05714 | -0.1068 | -0.1146 | -0.0464 | -0.2539 | -0.17   | -0.0869 | 0.1992  | 0.348   | -0.0741 | -0.0371 | 0.158   | 0.1433  |
| PY01434 | -0.4583 | -0.3454 | 0.0576  | -0.0071 | 0.2223  | -0.1192 | 0.2039  | 0.1848  | 0.3396  | -0.3822 | -0.0165 | -0.4387 |
| PY07164 | 0.0872  | -0.02   | 0.0985  | 0.358   | 0.0053  | 0.1335  | 0.174   | 0.0418  | -0.1094 | 0.2084  | -0.0145 | 0.1274  |
| PY02077 | -0.4815 | -0.2497 | 0.0834  | -0.3637 | -0.4205 | -0.0062 | -0.0218 | 0.0652  | 0.4028  | -0.3295 | 0.3099  | -0.4588 |
| PY00904 | 0.2273  | 0.0687  | -0.179  | 0.4173  | 0.3733  | 0.08    | -0.1275 | -0.3393 | -0.326  | -0.1095 | -0.0467 | -0.2785 |
| PY02308 | -0.0843 | -0.3367 | -0.1104 | -0.145  | -0.3952 | -0.1013 | -0.0022 | 0.2573  | 0.176   | 0.1823  | 0.1458  | 0.107   |
| PY01621 | 0.3052  | 0.1594  | -0.1524 | 0.3313  | -0.0506 | -0.2958 | -0.2119 | -0.0543 | -0.2696 | 0.298   | -0.137  | 0.1168  |
| PY04586 | 0.7786  | 0.321   | 0.1374  | 0.3432  | 0.0977  | 0.0975  | -0.2815 | 0.1786  | -0.3142 | 0.4195  | -0.2641 | -0.6093 |
| PY02883 | 0.1764  | 0.5191  | 0.6007  | -0.0372 | -0.2541 | 0.4388  | 0.5851  | 0.1877  | 0.1171  | -0.4085 | -0.5266 | -0.3153 |
| PY01581 | -1.0255 | -0.1095 | -0.4589 | -0.0592 | -0.2114 | -0.0487 | -0.1952 | 0.2557  | 0.1928  | 0.0626  | 0.4143  | -0.5269 |
| PY03697 | -0.6127 | -0.453  | -0.1662 | 0.1798  | -0.0879 | -0.0606 | 0.0038  | 0.1931  | 0.3099  | 0.3626  | 0.1933  | 0.6188  |
| PY04539 | -0.2185 | -0.8057 | -0.439  | 0.8931  | 0.7725  | 0.7711  | -0.1131 | 0.6384  | 0.2292  | 1.362   | 0.9835  | 0.3915  |
| PY03991 | 0.3664  | -0.0811 | -0.0541 | 0.5278  | 0.2795  | 0.0053  | -0.0561 | 0.3124  | -0.2125 | 0.0046  | 0.24    | -0.204  |
| PY04713 | -0.4406 | -0.0473 | -0.0159 | -0.2677 | -0.1309 | -0.1932 | -0.2454 | 0.1964  | 0.0243  | 0.4378  | 0.3418  | -0.2046 |
| PY06225 | 0.7273  | 0.2242  | 0.2857  | 0.2025  | 0.357   | -0.0942 | -0.1264 | -0.3543 | -0.2679 | -0.1867 | -0.5567 | -0.4124 |
| PY00062 | -0.6449 | -0.5856 | -0.4451 | -0.1239 | -0.4197 | -0.0981 | -0.6342 | 0.3319  | -0.6799 | 0.2849  | -0.1159 | -0.5061 |
| PY01987 | -0.1967 | -0.0465 | -0.1021 | 0.1646  | 0.3853  | 0.0303  | -0.0096 | -0.3186 | -0.0974 | 0.1996  | 0.1917  | -0.0511 |
| PY03465 | 0.4562  | 0.3163  | 0.1857  | -0.0432 | 0.1225  | -0.1318 | 0.0459  | -0.1681 | -0.3525 | -0.2051 | -0.058  | 0.0124  |
| PY02662 | 0.1319  | 0.3999  | 0.4613  | 0.9385  | 0.2851  | 0.0988  | -0.1343 | 0.134   | 0.0042  | 0.973   | 0.2693  | -0.0073 |
| PY03132 | 0.4534  | 0.2402  | 0.3415  | -0.0367 | 0.096   | -0.0982 | 0.1969  | -0.2291 | 0.0069  | -0.3274 | -0.2059 | 0.044   |
| PY03665 | -0.1848 | 0.3467  | 0.1351  | -0.068  | 0.1297  | -0.0302 | -0.094  | -0.0521 | -0.1334 | -0.1237 | 0.0598  | -0.684  |
| PY00793 | 0.0477  | -0.2629 | -0.0555 | 0.5755  | 0.6771  | 0.2399  | -0.15   | -0.2087 | -0.5539 | -0.1196 | 0.2916  | 0.0484  |
| PY06905 | -0.1593 | -0.0509 | 0.129   | -1.2529 | -0.8184 | -0.4355 | 0.1157  | -0.1342 | 0.2127  | -0.9331 | 0.1359  | -0.2507 |
| PY07248 | -0.6507 | -0.2368 | 0.0393  | 0.0282  | 0.1821  | -0.1718 | -0.1188 | 0.1009  | 0.0798  | 0.3294  | 0.6682  | 0.126   |
| PY01713 | -1.3473 | -1.004  | -1.0352 | -1.5663 | -1.0034 | -1.1574 | -0.3076 | 0.1845  | 0.4395  | 0.4292  | 1.054   | 0.0823  |
| PY01809 | 0.4607  | 0.1579  | 0.0232  | 0.2496  | 0.2748  | 0.0869  | 0.1255  | -0.1876 | 0.0796  | 0.0047  | -0.0594 | 0.2378  |
| PY05154 | 0.3147  | 0.4283  | 0.3403  | -0.2723 | 0.2186  | -0.0753 | 0.4633  | -0.2182 | 0.0183  | -0.2104 | 0.1724  | -0.0494 |
| PY02595 | -0.0406 | -0.4853 | 0.1672  | 0.1624  | -0.1374 | -0.1058 | -0.077  | 0.2622  | 0.3498  | 0.4871  | -0.0381 | 0.0598  |
| PY03884 | 0.4217  | 0.661   | 0.7944  | 0.512   | -0.4381 | -0.6061 | -0.0817 | -0.8461 | 0.0336  | -0.5964 | -1.2634 | 0.0906  |
| PY06193 | 0.6361  | 0.2377  | 0.1548  | -0.1559 | 0.1088  | 0.0542  | 0.1565  | -0.2795 | -0.2051 | -0.1187 | -0.1217 | 0.1884  |
| PY03612 | 0.0612  | -0.1025 | -0.0643 | 0.3025  | 0.2164  | -0.0239 | 0.1095  | 0.1382  | -0.2128 | -0.1171 | -0.2184 | -0.3309 |
| PY00829 | -0.5353 | -0.3492 | -0.111  | 0.4056  | 0.5651  | 0.1564  | -0.0008 | -0.2652 | -0.244  | -0.1189 | -0.1526 | -0.0287 |

|         |         |         |         |         |         |         |         |         |         |         |         |         |
|---------|---------|---------|---------|---------|---------|---------|---------|---------|---------|---------|---------|---------|
| PY00763 | 0.281   | 0.1341  | -0.028  | -0.1192 | -0.0661 | -0.5025 | -0.5386 | -0.1163 | -0.0263 | -0.1157 | 0.2032  | -0.2478 |
| PY04882 | -0.4374 | -0.4199 | -0.408  | -0.4175 | -0.2838 | -0.6426 | -0.105  | -0.1287 | 0.1028  | -0.0217 | -0.1664 | -0.0729 |
| PY05381 | -0.159  | 0.1177  | 0.018   | -0.3896 | 0.0627  | -0.3148 | -0.1052 | 0.0622  | -0.0775 | 0.3091  | 0.315   | 0.1728  |
| PY01990 | 0.1033  | 0.0385  | 0.0275  | -0.8599 | -0.2951 | -0.0845 | -0.1129 | -0.0947 | 0.0327  | -0.2357 | 0.3375  | -0.0019 |
| PY05055 | 0.6777  | 0.3886  | 0.3675  | -0.3305 | -0.3504 | 0.4574  | 0.3662  | 0.2003  | -0.2889 | -0.3835 | -0.7663 | -0.7253 |
| PY01051 | -0.1749 | -0.2054 | -0.093  | -0.7437 | -0.5856 | -0.1653 | 0.2957  | -0.039  | -0.0372 | -0.6293 | -0.7426 | -0.2749 |
| PY01015 | -0.7644 | -0.1824 | -0.0184 | -0.1841 | -0.3276 | -0.0341 | 0.1196  | 0.4168  | 0.4955  | 0.0463  | -0.0075 | -0.3147 |
| PY03524 | -0.3347 | -0.5258 | -0.2534 | 0.4082  | 0.4403  | -0.0047 | 0.0233  | -0.0953 | -0.0233 | 0.3835  | 0.0268  | 0.1009  |
| PY01951 | 0.1779  | 0.1274  | 0.2046  | 0.4397  | 0.04    | 0.0843  | 0.1112  | 0.0833  | 0.0875  | -0.1177 | 0.0169  | 0.0928  |
| PY07005 | 0.4951  | 0.1354  | 0.286   | 0.366   | 0.2008  | 0.2018  | 0.2376  | 0.0485  | 0.2625  | 0.1449  | 0.051   | 0.3161  |
| PY03070 | -1.3171 | 0.001   | 0.3515  | -0.101  | -0.3953 | -0.8245 | -0.3025 | 0.0852  | 0.1112  | 0.2599  | 0.331   | -0.1567 |
| PY00544 | -0.182  | -0.2765 | 0.072   | -0.5916 | -0.0719 | 0.0016  | -0.1553 | -0.3302 | -0.1588 | -0.4428 | -0.0303 | -0.1777 |
| PY07110 | -0.5399 | -0.3073 | -0.0422 | -0.1586 | 0.0993  | -0.0144 | 0.0724  | 0.4069  | 0.2107  | -0.1247 | 0.4449  | -0.1743 |
| PY02896 | 0.5385  | 0.381   | 0.6793  | 0.8671  | -0.0207 | 0.2375  | 0.6327  | 0.2226  | 0.6213  | 0.8409  | -0.2036 | 0.7189  |
| PY02513 | -0.3739 | -0.0741 | -0.1271 | 1.125   | 0.7589  | 1.0249  | 0.0233  | 0.6409  | 0.0246  | 0.8548  | 1.0237  | -0.2127 |
| PY07470 | -0.1624 | 0.1858  | 0.314   | 0.3793  | -0.3208 | -0.1246 | 0.2582  | 0.1332  | 0.4009  | -0.0474 | -0.2591 | 0.1671  |
| PY05138 | -0.609  | -0.051  | -0.2309 | 0.0218  | -0.3155 | 0.1727  | 0.1131  | 0.1623  | 0.2305  | 0.7793  | 0.3668  | -0.1541 |
| PY05608 | -0.2278 | -0.0973 | -0.1372 | 0.1895  | 0.1921  | 0.3812  | 0.0745  | -0.1384 | 0.0337  | 0.0126  | 0.1137  | -0.0762 |
| PY03103 | 0.046   | -0.0904 | 0.2618  | 0.0475  | 0.1005  | 0.2631  | -0.028  | 0.0158  | -0.095  | 0.1672  | 0.0176  | -0.4747 |
| PY00936 | 0.2043  | 0.4748  | 0.9348  | 0.458   | 0.3129  | 0.2558  | 0.39    | -0.187  | 0.0882  | -0.381  | -0.192  | 0.3827  |
| PY04604 | 0.2404  | 0.075   | -0.1136 | 0.261   | -0.0684 | 0.0218  | -0.134  | -0.114  | -0.0593 | 0.0057  | -0.2903 | -0.149  |
| PY05662 | 0.4853  | 0.4835  | 0.7051  | 0.2806  | -0.2818 | 0.6551  | 0.711   | 0.1442  | 0.6236  | 0.36    | -0.3459 | 0.1991  |
| PY06056 | 0.5733  | 0.2128  | -0.0723 | 0.0563  | 0.0195  | -0.2256 | -0.358  | -0.1377 | -0.1924 | 0.1308  | -0.2047 | -0.078  |
| PY05771 | 0.5661  | 0.0325  | -0.2366 | 0.0672  | 0.2471  | -0.1627 | -0.1158 | -0.2693 | -1.5578 | -0.008  | 0.1276  | -0.0354 |
| PY04449 | -0.752  | -0.4212 | -0.2313 | -0.0689 | 0.1359  | 0.1616  | -0.1321 | 0.1182  | 0.0192  | 0.2583  | 0.3616  | -0.0341 |
| PY03798 | 0.0259  | -0.0548 | -0.4563 | 0.5394  | 0.3312  | -0.0567 | -0.2143 | 0.3844  | 0.0346  | 0.5499  | -0.0403 | 0.3847  |
| PY03879 | -0.657  | -0.0887 | 0.3412  | 0.4399  | 0.0085  | -0.2544 | -0.1826 | 0.2078  | -0.3254 | -0.343  | 0.2557  | -0.1514 |
| PY07328 | -0.2058 | -0.1234 | -0.077  | -0.0439 | -0.0095 | -0.0303 | -0.0216 | 0.2856  | 0.0663  | 0.1487  | 0.5704  | -0.0826 |
| PY00242 | -0.8214 | -0.0963 | -0.0577 | -0.2681 | -0.3469 | -0.1271 | -0.1827 | 0.1523  | -0.2743 | 0.0153  | 0.1775  | -0.3041 |
| PY06811 | 0.2544  | -0.2178 | -0.099  | -0.314  | 0.1875  | -0.0161 | -0.0112 | -0.1869 | -0.2341 | -0.5354 | -0.4383 | -0.5749 |
| PY05435 | 0.6704  | 0.2229  | -1.0273 | -0.6615 | -0.0893 | 0.2102  | -0.0798 | -0.7681 | -0.4311 | -0.4534 | -0.3638 | -0.0758 |
| PY02467 | -0.3441 | -0.1417 | 0.1088  | -0.0107 | -0.0659 | 0.1967  | 0.2414  | 0.2493  | 0.1267  | 0.1547  | -0.151  | 0.1607  |
| PY04974 | 0.5157  | 0.2528  | 0.017   | -0.6708 | -0.1854 | -0.2803 | 0.0228  | -0.019  | 0.1674  | -0.2427 | 0.2288  | 0.408   |
| PY05787 | 0.6086  | 0.1041  | -0.0711 | -0.2768 | -0.0983 | -0.0098 | -0.021  | -0.3228 | -0.2085 | -0.3329 | -0.4019 | 0.1906  |
| PY02587 | 0.2247  | 0.1364  | 0.0521  | -0.2218 | -0.1257 | 0.1841  | -0.0257 | -0.1515 | -0.233  | -0.1264 | -0.4421 | -0.5264 |
| PY04965 | 0.4948  | 0.2703  | -0.1058 | -0.3791 | 0.0963  | -0.1495 | -0.1004 | -0.4257 | 0.0107  | -0.4004 | -0.0892 | -0.2471 |
| PY03083 | 0.0924  | -0.1363 | 0.0301  | 0.2019  | 0.2852  | 0.0674  | -0.2673 | 0.1311  | 0.087   | -0.0724 | 0.0292  | -0.0312 |
| PY07051 | 0.1532  | -0.0171 | -0.1803 | 0.1971  | 0.0179  | -0.3362 | -0.0416 | -0.3708 | -1.3026 | -0.243  | -0.1248 | -0.8039 |
| PY06295 | 0.3634  | -0.0586 | -0.4016 | -0.3138 | 0.2186  | -0.2408 | -0.1091 | -0.1474 | -0.1703 | -0.4368 | -0.1167 | -0.0794 |
| PY07546 | 0.4648  | 0.3208  | 0.4332  | 0.4954  | -0.1767 | 0.0886  | 0.184   | -0.3034 | 0.0692  | -0.5778 | -0.5718 | -0.067  |
| PY02875 | 0.6821  | 0.034   | -0.2804 | -0.0762 | 0.1321  | -0.2701 | -0.4843 | -0.5675 | -0.7598 | -1.0926 | -0.6652 | -0.5908 |
| PY02107 | -0.5728 | -0.151  | -0.0319 | 0.1336  | -0.0602 | -0.1976 | -0.2401 | 0.1776  | -0.0278 | 0.1114  | 0.5312  | -0.2486 |
| PY03222 | -0.3733 | -0.0918 | -0.298  | -0.363  | -0.2286 | -0.226  | -0.0458 | -0.0231 | -0.1728 | -0.1705 | -0.0099 | 0.0148  |
| PY07385 | 0.4402  | 0.0235  | 0.0929  | 1.2767  | 0.68    | 0.1032  | -0.0718 | 0.1695  | -0.1469 | 0.8007  | 0.4513  | 0.002   |
| PY03988 | 0.233   | 0.1993  | 0.8289  | 0.3599  | -0.0828 | 0.4167  | 0.4211  | 0.458   | 0.4117  | -0.1016 | -0.1176 | 0.0579  |
| PY05286 | 0.1619  | 0.3701  | 0.2656  | -0.9162 | -0.5258 | -0.1058 | 0.1567  | -0.4069 | -0.0501 | -0.3153 | -0.3963 | 0.1247  |
| PY04039 | -0.5151 | -0.0781 | 0.2574  | -0.0381 | -0.0744 | -0.0616 | -0.2759 | -0.0265 | 0.1016  | -0.0441 | 0.1476  | 0.443   |
| PY04950 | -0.0578 | -0.1081 | -0.1352 | -0.2658 | -0.3855 | -0.517  | -0.4594 | -0.15   | -0.1594 | -0.039  | -0.2362 | -0.0152 |
| PY00291 | 0.6314  | 0.2902  | 0.1777  | -0.2424 | -0.0443 | 1.0406  | 0.4494  | 0.2651  | 0.1834  | 0.2264  | -0.1114 | 0.2036  |
| PY00593 | 0.2899  | 0.0654  | 0.6202  | -0.5721 | -0.6942 | 0.3304  | 0.8358  | 0.2792  | 0.5732  | -0.1367 | -0.1574 | 0.6829  |
| PY05512 | -0.7623 | -0.2914 | -0.0085 | -0.2227 | 0.047   | -0.0454 | -0.208  | -0.0688 | 0.1325  | 0.1193  | 0.3235  | 0.0274  |
| PY06098 | -0.9213 | 0       | -0.2751 | -0.1023 | 0.4124  | 0.3696  | 0.4073  | 0.5589  | 0.0868  | 0.6609  | 0.9767  | 0.2182  |
| PY07136 | -1.0643 | -0.097  | 0.198   | 0.0529  | 0.0624  | 0.2549  | 0.19    | 0.6153  | 0.1079  | -0.0306 | 0.1652  | -0.4127 |
| PY03441 | 0.1539  | 0.0774  | 0.0704  | -0.3914 | 0.1959  | 0.024   | -0.0702 | -0.2142 | 0.003   | -0.2801 | -0.0179 | 0.0062  |
| PY05029 | 0.3038  | 0.187   | 0.3307  | 0.3388  | 0.2599  | 0.3443  | -0.1272 | -0.2708 | 0.4276  | 0.2745  | 0.461   | 0.1683  |
| PY02130 | 0.0044  | -0.1159 | -0.0798 | -0.5942 | 0.0661  | 0.2667  | 0.14    | -0.3962 | 0.0243  | 0.0096  | -0.1303 | 0.6109  |
| PY01824 | -0.3321 | -0.2941 | -0.2698 | 0.3666  | 0.2722  | 0.2771  | -0.0338 | 0.178   | -0.2004 | 0.0199  | -0.0513 | 0.1093  |
| PY03098 | 0.7404  | 0.2063  | 0.2367  | -0.0141 | -0.1    | -0.0662 | 0.1479  | -0.0372 | 0.1398  | 0.1163  | -0.3095 | 0.2036  |
| PY00432 | -0.4829 | 0.0287  | -0.3098 | 0.113   | -0.3709 | 0.0719  | -0.2196 | 0.4961  | 0.3404  | 0.5067  | 0.5926  | 0.2087  |
| PY00565 | 0.6881  | 0.4786  | 0.492   | 0.6818  | 0.2695  | 0.0898  | 0.1049  | 0.2058  | -0.2081 | 0.5627  | -0.2041 | 0.3993  |
| PY05713 | 1.0964  | 0.6471  | 0.4636  | 0.4931  | -0.302  | -0.0956 | 0.6867  | 0.0012  | 0.4148  | 0.1326  | -0.1941 | 0.6254  |
| PY06117 | -0.328  | -0.314  | -0.3142 | 0.1841  | 0.3624  | 0.1174  | -0.144  | -0.0057 | -0.0313 | 0.2492  | 0.0127  | -0.0216 |
| PY04635 | -0.186  | -0.1563 | -0.2715 | -0.6346 | 0.0784  | 0.0396  | 0.0275  | 0.1321  | 0.1687  | -0.2805 | 0.2118  | -0.0583 |



|         |         |         |         |         |         |         |         |         |         |         |         |         |
|---------|---------|---------|---------|---------|---------|---------|---------|---------|---------|---------|---------|---------|
| PY03082 | 0.4668  | -0.1206 | -0.7962 | -0.4996 | 0.0422  | -0.1721 | -0.3613 | -0.0513 | -0.393  | -0.0014 | -0.3564 | -0.1094 |
| PY06189 | 0.4909  | -0.2723 | -0.2826 | -0.3899 | -0.2438 | -0.3789 | -0.1819 | -0.4017 | -0.0454 | -0.1945 | 0.0073  | 0.2494  |
| PY04058 | -0.28   | -0.003  | -0.0327 | 0.5866  | 0.3701  | 0.027   | -0.2593 | -0.1315 | -0.0758 | -0.1582 | 0.0365  | -0.1148 |
| PY02676 | -0.3279 | -0.3166 | -0.0991 | 0.6785  | 0.1735  | 0.0024  | 0.0384  | 0.4893  | 0.1159  | 0.8009  | -0.001  | -0.7241 |
| PY04290 | -0.3681 | -0.0803 | -0.3958 | 0.1829  | -0.2779 | 0.4025  | -0.3622 | -0.0508 | -0.0776 | -0.3015 | 0.1863  | -0.0699 |
| PY05488 | 0.7006  | 0.468   | 0.0572  | 0.4211  | 0.2113  | 0.3071  | 0.1145  | -0.3788 | -0.1805 | 0.2222  | -0.6102 | -0.2526 |
| PY03918 | -1.4596 | -0.6397 | 0.0878  | -0.8266 | -0.5566 | -0.202  | 0.0317  | 0.7527  | 0.0579  | -0.5103 | 0.268   | -1.1194 |
| PY01014 | -0.7491 | -0.1319 | -0.1401 | -0.5745 | -0.442  | 0.0618  | 0.1276  | 0.1507  | 0.0432  | -0.5183 | -0.0517 | -0.6503 |
| PY02933 | -0.0561 | 0.0356  | -0.239  | 0.3045  | 0.4414  | -0.0559 | 0.2772  | 0.3585  | 0.1058  | 0.0342  | 0.5638  | 0.1715  |
| PY05532 | -0.1482 | 0.011   | 0.0369  | -0.1691 | -0.0579 | -0.0195 | -0.0254 | -0.0107 | 0.0286  | -0.2322 | 0.1668  | -0.0508 |
| PY02946 | 0.0265  | -0.1744 | 0.0042  | -0.827  | -0.3319 | -0.0989 | -0.0424 | -0.1443 | 0.0893  | -0.2545 | -0.4361 | 0.3488  |
| PY05247 | -0.4958 | -0.2872 | 0.0957  | -0.0438 | -0.2488 | -0.0219 | 0.0686  | 0.4351  | 0.5318  | 0.4948  | 0.944   | 0.3217  |
| PY03602 | 0.7262  | 0.373   | 0.5139  | 0.2461  | 0.2605  | 0.1463  | 0.0755  | -0.2538 | -0.0381 | 0.0599  | -0.0913 | 0.0817  |
| PY01229 | 0.5114  | 0.242   | 0.3582  | -0.0654 | 0.24    | 0.0422  | 0.2157  | -0.0536 | 0.2592  | 0.0811  | 0.1936  | 0.484   |
| PY00329 | 0.1366  | 0.3855  | 0.2498  | -1.8531 | -1.0907 | 0.0775  | 0.3016  | -1.1849 | 0.2269  | -1.4243 | -0.88   | 0.2688  |
| PY02809 | 0.4414  | 0.0115  | -0.361  | -0.0072 | -0.1768 | -0.1765 | -0.043  | -0.085  | 0.0037  | 0.0844  | 0.0075  | 0.3596  |
| PY06341 | 0.8485  | 0.595   | 0.1233  | 0.362   | -0.1933 | 0.2102  | 0.3107  | 0.002   | -0.0694 | 0.1948  | -0.009  | 0.0983  |
| PY02912 | -0.878  | -0.1483 | 0.3825  | 0.3629  | -0.1743 | -0.3297 | -0.3049 | 0.0821  | 0.0873  | 0.1208  | 0.8434  | -0.1388 |
| PY05995 | -0.5791 | -0.2645 | -0.1283 | 0.4293  | -0.3974 | -0.3418 | -0.1255 | 0.2173  | 0.7439  | 0.723   | 0.2663  | 0.1717  |
| PY06025 | 0.0189  | -0.2214 | -0.0739 | 0.5929  | 0.0842  | -0.346  | -0.1517 | -0.0695 | 0.1276  | 0.079   | 0.4775  | 0.0965  |
| PY04660 | -1.121  | -0.1494 | 0.3223  | -0.2704 | -0.1106 | -0.0905 | -0.002  | 0.3822  | -0.0555 | -0.0719 | 0.4471  | -0.208  |
| PY02509 | 0.5348  | 0.2256  | -0.1457 | 0.233   | 0.4806  | 0.275   | 0.1081  | 0.1016  | -0.2682 | 0.2281  | 0.2773  | 0.0479  |
| PY07068 | -0.0444 | -0.1762 | -0.0964 | -1.8707 | -1.3198 | -0.2788 | 0.0277  | -0.9126 | -0.0872 | -1.3875 | -1.4326 | 0.015   |
| PY04542 | 0.3035  | -0.1692 | -0.068  | 1.2343  | 0.9719  | 1.3184  | 0.2403  | 1.2276  | 0.3601  | 0.7751  | 0.6294  | 0.3732  |
| PY05914 | -0.0454 | -0.2199 | -0.0476 | -0.4818 | -0.1938 | -0.5113 | -0.2428 | -0.2024 | 0.0347  | -0.1616 | 0.0461  | 0.4097  |
| PY02987 | -0.4856 | -0.2631 | -0.1807 | 0.1941  | -0.2355 | -0.1156 | -0.2278 | 0.198   | -0.8704 | 0.3111  | 0.2256  | -0.2361 |
| PY06527 | 0.0938  | -0.0769 | -0.241  | -0.016  | 0.0085  | 0.4008  | 0.4505  | 0.1913  | -0.0146 | -0.3097 | -0.4799 | -0.18   |
| PY06718 | -0.3745 | -0.1958 | 0.1649  | 0.0761  | -0.0017 | 0.2743  | 0.2538  | 0.0434  | -0.0159 | 0.1798  | -0.0211 | 0.2786  |
| PY06370 | 1.1073  | 0.5777  | 0.4714  | 0.4269  | -0.0023 | 0.1467  | 0.3209  | -0.1218 | 0.3221  | 0.0708  | -0.245  | 0.5851  |
| PY06130 | 0.4428  | 0.3937  | 0.0502  | 0.4208  | -0.3552 | -0.1095 | 0.0021  | 0.2531  | 0.223   | 0.1402  | -0.4008 | -0.0636 |
| PY06202 | -0.2371 | 0.0042  | -0.0671 | 0.4359  | 0.4463  | -0.0658 | 0.095   | 0.0843  | 0.0619  | 0.4456  | 0.5893  | 0.1015  |
| PY03008 | 0.0052  | -0.1154 | -0.1238 | 0.2487  | 0.0972  | -0.1102 | -0.2367 | -0.129  | -0.0732 | 0.0924  | 0.3653  | 0.0028  |
| PY04930 | 0.8208  | 0.9271  | 1.1932  | -0.1192 | -0.396  | -0.1849 | 0.4962  | -0.202  | 0.2105  | -0.5465 | -0.6593 | -0.3056 |
| PY00456 | -0.1121 | -0.0272 | 0.2094  | 0.4627  | 0.2714  | 0.3602  | 0.2311  | 0.2061  | 0.2887  | 0.1985  | -0.0685 | 0.2921  |
| PY01487 | -0.8247 | -0.1118 | 0.0852  | -0.2049 | -0.0044 | -0.1371 | 0.1908  | 0.2224  | 0.3464  | 0.0726  | 0.5174  | 0.0144  |
| PY02578 | -0.2386 | -0.2186 | 0.0484  | 1.4867  | 0.5126  | 0.2242  | -0.4398 | 0.3861  | -0.5443 | 0.858   | 0.0645  | 0.1189  |
| PY04624 | 0.152   | 0.1704  | 0.3366  | -0.2547 | -0.1045 | -0.0784 | 0.2245  | 0.0021  | -0.2656 | -0.4748 | -0.1302 | -0.0491 |
| PY03147 | 0.7467  | 0.1296  | -0.2061 | 0.3358  | 0.2584  | -0.0659 | -0.2652 | -0.5923 | -0.1218 | 0.016   | -0.8459 | -0.1453 |
| PY00416 | 0.6838  | 0.201   | 0.1843  | 0.0061  | 0.0824  | 0.1062  | 0.1749  | -0.3397 | -0.1785 | -0.1454 | -0.5212 | 0.12    |
| PY01933 | -0.4066 | -0.2165 | -0.1907 | 0.3455  | 0.3619  | -0.2407 | -0.3023 | -0.1283 | -0.1065 | 0.2371  | 0.2732  | 0.3022  |
| PY00764 | 0.6125  | 0.2046  | 0.1235  | 0.0489  | -0.2119 | -0.4616 | 0.1392  | -0.1578 | 0.3718  | -0.003  | 0.069   | 0.4229  |
| PY05803 | -0.6583 | -0.3479 | -0.2055 | -0.5191 | 0.1751  | 0.1368  | -0.0423 | 0.0732  | -0.1279 | 0.1723  | 0.1895  | 0.1996  |
| PY01324 | -0.0496 | -0.0728 | -0.1965 | 0.4122  | -0.1246 | -0.1921 | -0.0938 | 0.0625  | -0.0089 | 0.055   | 0.6475  | -0.2213 |
| PY06655 | 0.9459  | 0.3994  | 0.5536  | 0.516   | 0.3655  | 0.2368  | 0.1765  | -0.145  | 0.4687  | 0.23    | -0.1283 | 0.8875  |
| PY07562 | -0.846  | -0.2843 | 0.0717  | 0.2459  | -0.0333 | -0.1995 | 0.1322  | 0.1648  | 0.2091  | -0.1723 | 0.0782  | -0.189  |
| PY04625 | 0.0157  | -0.1756 | -0.0477 | -1.0362 | 0.0644  | -0.0092 | 0.205   | -0.4514 | -0.2732 | -0.7295 | -0.4947 | 0.1028  |
| PY02651 | -0.6854 | -0.0467 | -0.825  | 0.3666  | 0.0728  | 0.3955  | 0.1483  | 0.3843  | 0.3841  | 0.0989  | 0.2662  | 0.1143  |
| PY02902 | -0.8217 | -0.0921 | 0.246   | 0.3844  | 0.114   | -0.1337 | 0.1143  | 0.4418  | 0.1854  | 0.0457  | 0.6673  | -0.6858 |
| PY05071 | -0.0527 | -0.1844 | 0.0233  | 0.4164  | 0.6394  | 0.1979  | -0.0075 | -0.1309 | 0.008   | 0.5372  | 0.2087  | 0.2301  |
| PY04110 | 0.2171  | -0.0052 | 0.1811  | 0.0977  | 0.5087  | 0.0107  | 0.1886  | -0.2764 | 0.1625  | -0.7384 | 0.3297  | 0.253   |
| PY02928 | -0.0058 | 0.1961  | 0.1159  | -0.3823 | -0.9123 | -0.3889 | 0.5294  | -0.2632 | -0.0936 | -0.5429 | -0.6536 | -0.1678 |
| PY07408 | -0.1333 | 0.0157  | 0.1501  | -0.5301 | -0.0352 | -0.0405 | 0.1921  | -0.1723 | 0.0112  | -0.0776 | -0.3867 | -0.0721 |
| PY06586 | -0.1124 | -0.1177 | 0.1244  | -0.2367 | -0.0551 | 0.1772  | 0.0431  | -0.2229 | 0.0755  | -0.1116 | 0.0055  | -0.3231 |
| PY04245 | -0.5159 | 0.0036  | 0.3694  | 0.1724  | 0.0763  | 0.1104  | 0.0681  | -0.5797 | 0.0314  | 0.387   | -0.0607 | -0.0218 |
| PY05237 | -1.2706 | -0.6575 | -0.695  | -0.8529 | -0.5389 | -0.7533 | -0.2226 | 0.3516  | 0.3029  | 0.1791  | 0.5513  | -0.1027 |
| PY05285 | -1.2517 | -0.1206 | -0.1176 | -0.3754 | -0.4948 | -0.3977 | -0.3628 | 0.0643  | 0.193   | 0.2884  | 0.1269  | 0.1109  |
| PY04824 | -0.1932 | 0.0737  | -0.0662 | -0.3236 | -0.152  | -0.1284 | 0.068   | -0.1752 | 0.1639  | -0.0795 | 0.0941  | -0.0794 |
| PY03338 | 0.3742  | 0.3037  | -0.0863 | -0.2302 | 0.0371  | -0.1278 | -0.27   | 0.0598  | -0.2551 | -0.1418 | 0.2226  | -0.6306 |
| PY05335 | -0.0669 | -0.1987 | -0.5007 | 0.3807  | 0.2117  | 0.0177  | -0.0763 | 0.169   | -0.3634 | -0.1617 | -0.1219 | -0.1162 |
| PY00246 | 0.1993  | -0.1994 | -0.2258 | 0.5699  | -0.6938 | 0.1523  | -0.1769 | -0.2041 | 0.14    | -0.0962 | 0.0534  | 0.5204  |
| PY02708 | 0.0305  | -0.0883 | -0.0436 | 0.443   | 0.2172  | -0.1015 | -0.0964 | 0.0151  | 0.0098  | 0.3267  | -0.2245 | 0.09    |
| PY00520 | -1.4769 | -0.6266 | -0.097  | -0.5299 | -0.0896 | 0.0216  | 0.1649  | 0.2583  | 0.3573  | 0.2119  | 0.5825  | -0.1165 |
| PY07034 | 0.0776  | -0.0961 | -0.0753 | -0.1002 | -0.2441 | -0.1043 | 0.1474  | -0.0016 | -0.067  | -0.3006 | -0.0725 | 0.1219  |

|         |         |         |         |         |         |         |         |         |         |         |         |         |
|---------|---------|---------|---------|---------|---------|---------|---------|---------|---------|---------|---------|---------|
| PY02769 | -0.5646 | -0.3333 | -0.6797 | 0.3582  | -0.2127 | -0.1623 | 0.0809  | 0.4999  | 0.2717  | -0.0083 | 0.2739  | -0.1549 |
| PY02244 | -1.3517 | -1.2339 | -1.0012 | -0.134  | -0.0583 | -0.1318 | -0.0537 | 0.1301  | 0.2668  | 0.1694  | 0.3304  | -0.1248 |
| PY03164 | -0.8681 | -0.6037 | -0.3041 | -0.1987 | -0.1492 | 0.3066  | 0.1315  | 0.036   | 0.2082  | 0.1924  | -0.0429 | 0.0145  |
| PY02336 | 0.2826  | -0.0572 | 0.4235  | 0.2641  | 0.1087  | -0.1029 | -0.0417 | -0.2604 | -0.0639 | -0.3072 | -0.512  | 0.2627  |
| PY01612 | 0.3466  | 0.0659  | 0.0593  | 0.2045  | -0.0227 | -0.1695 | -0.2872 | -0.0216 | 0.0383  | 0.1398  | 0.2757  | 0.0339  |
| PY02811 | 0.5933  | 0.075   | 0.3493  | 0.1609  | 0.484   | 0.1003  | 0.0743  | -0.2524 | -0.4311 | -0.0733 | 0.2604  | 0.0107  |
| PY01429 | -0.5367 | 0.4223  | 0.4063  | -0.1308 | -0.4967 | -0.8113 | -0.1097 | -0.2152 | 0.0167  | -0.2821 | 0.816   | 0.2569  |
| PY00523 | -0.7828 | -0.1283 | -0.4051 | -0.2996 | -0.9392 | -0.6049 | -0.5004 | 0.2495  | 0.6355  | 0.6222  | 0.2325  | 0.2823  |
| PY00688 | 0.5966  | 0.436   | 0.0767  | 0.8872  | 0.5215  | -0.0202 | 0.0827  | -0.1337 | -0.3527 | -0.222  | -0.1639 | -0.2172 |
| PY03124 | 0.3345  | -0.0623 | -0.1115 | -0.1586 | 0.2992  | -0.1781 | -0.222  | 0.0039  | 0.174   | -0.0402 | -0.0986 | 0.1656  |
| PY01458 | -0.4717 | -0.9135 | -0.8524 | -0.2542 | -0.0469 | 0.3085  | 0.3101  | 0.2764  | 0.339   | 0.1997  | 0.3215  | -0.4662 |
| PY01034 | 0.7465  | 0.3494  | 0.6741  | 0.1934  | 0.1574  | -0.0465 | -0.065  | -0.1942 | -0.0104 | -0.1273 | 0.0975  | 0.2804  |
| PY04926 | 0.5946  | 0.2523  | 0.0271  | 0.0439  | -0.1399 | -0.1421 | 0.0686  | -0.2902 | -0.2974 | -0.2249 | -0.2367 | -0.2516 |
| PY02410 | -0.9696 | -0.2726 | -0.2044 | -0.3205 | 0.1108  | 0.0933  | 0.0855  | 0.3347  | 0.0398  | 0.2478  | 0.341   | -0.241  |
| PY00287 | 0.2211  | 0.6059  | 0.4841  | 0.1026  | -0.2981 | 0.4018  | 0.3877  | -0.1351 | 0.1694  | 0.096   | -0.4306 | 0.244   |
| PY04585 | 0.0155  | -0.1589 | -0.2579 | 0.0113  | 0.2715  | -0.1658 | -0.1543 | -0.0518 | -0.2682 | 0.0608  | 0.1688  | 0.213   |
| PY06427 | -0.079  | -0.0662 | -0.0173 | -0.4903 | -0.1045 | -0.0853 | 0.1362  | -0.0443 | -0.0818 | -0.346  | -0.1151 | -0.6112 |
| PY05678 | -0.9299 | -0.3862 | -0.2009 | -0.9248 | -0.4235 | -0.3171 | 0.1232  | 0.3302  | 0.4303  | -0.1397 | 0.3036  | 0.0921  |
| PY07575 | -0.3427 | -0.0317 | -0.4461 | 1.3095  | -0.499  | -0.2973 | -0.1643 | 0.3261  | 0.287   | -0.3914 | -0.2372 | -0.4416 |
| PY03326 | -0.7134 | -0.1523 | -0.0975 | 0.4446  | 0.2265  | 0.2498  | 0.1205  | 0.3763  | -0.0104 | 0.1217  | 0.1443  | -0.2319 |
| PY07399 | -0.1759 | 0.1287  | -0.6079 | -0.1136 | 0.1366  | 0.3658  | 0.094   | 0.1756  | -0.0088 | 0.2313  | -0.1647 | -0.0962 |
| PY04005 | -0.1233 | -0.3504 | -0.1333 | 0.0222  | 0.3102  | -0.056  | -0.0397 | -0.0766 | -0.1123 | -0.0346 | 0.2174  | 0.0077  |
| PY00016 | -0.1472 | -0.092  | -0.481  | -0.0255 | -0.1613 | 0.2562  | 0.1761  | 0.255   | -0.096  | -0.0611 | -0.1996 | -0.2299 |
| PY01881 | -0.3558 | -0.2778 | -0.2623 | -0.0343 | 0.2153  | 0.0254  | -0.2677 | -0.0368 | 0.3179  | -0.1467 | 0.0663  | -0.0699 |
| PY03962 | -0.8605 | 0.0541  | 0.0128  | -0.1629 | 0.6126  | 0.3568  | 0.0219  | -0.0124 | -0.152  | -0.3124 | -0.1104 | -0.398  |
| PY05696 | 0.216   | 0.0589  | -0.3142 | -0.5188 | -0.3254 | -0.2234 | 0.0368  | 0.1132  | 0.1214  | -0.4411 | 0.3306  | -0.5413 |
| PY00978 | 0.0873  | -0.2038 | -0.2504 | -0.4952 | -0.2315 | -0.2496 | -0.1188 | -0.2379 | 0.0497  | 0.1938  | 0.0761  | 0.3575  |
| PY07070 | -0.297  | -0.0087 | -0.4419 | -0.2951 | -0.172  | -0.024  | 0.0386  | -0.2853 | 0.0401  | -0.0301 | -0.4214 | 0.1285  |
| PY04735 | 0.8222  | 0.3658  | 0.7975  | -0.0845 | 0.0199  | 0.1065  | 0.32    | -0.0984 | 0.36    | -0.1862 | -0.2587 | 0.3134  |
| PY04088 | 0.7052  | 0.2311  | 0.2046  | -0.2362 | -0.0779 | 0.1871  | 0.4411  | 0.0392  | 0.2515  | 0.166   | -0.2619 | 0.5172  |
| PY01754 | -0.3715 | -0.1005 | -0.0292 | -0.3888 | -0.0703 | -0.1052 | 0.0632  | 0.1886  | 0.3811  | 0.1332  | 0.3271  | 0.1598  |
| PY06388 | 0.0621  | 0.0658  | -0.0756 | 0.1713  | 0.1254  | -0.0768 | -0.1676 | -0.2043 | -0.1933 | 0.3226  | 0.1202  | -0.0002 |
| PY00467 | -0.6316 | -0.7419 | -0.1197 | 0.0089  | -0.1247 | -0.1924 | -0.7101 | -1.1583 | -1.081  | 0.3638  | -0.4822 | -1.0664 |
| PY05074 | -0.5658 | -0.2044 | -0.3507 | 0.427   | 0.2001  | -0.3843 | -0.0673 | 0.4012  | 0.3198  | 0.3168  | 0.3035  | -0.0131 |
| PY04668 | -0.5475 | 0.0209  | 0.0094  | 0.2556  | -0.4048 | -0.1461 | 0.0364  | 0.2818  | 0.1959  | -0.4228 | -0.2845 | -0.2535 |
| PY06300 | -0.2878 | -0.2284 | -0.2692 | -0.5693 | 0.1735  | -0.4328 | -0.3328 | -0.2312 | -0.3317 | -0.189  | -0.2034 | 0.0115  |
| PY04279 | 0.2785  | 0.041   | 0.2342  | -0.2897 | 0.0557  | -0.1157 | 0.0407  | -0.14   | 0.0107  | 0.0101  | -0.1964 | 0.333   |
| PY07464 | 0.0392  | 0.2633  | 0.4721  | -0.448  | -0.6446 | -0.069  | 0.0525  | -0.07   | 0.1299  | 0.1737  | 0.1217  | -0.1126 |
| PY03110 | -0.5125 | -0.0925 | -0.497  | 0.2077  | 0.1851  | 0.0854  | -0.095  | 0.1448  | -0.1388 | 0.2198  | 0.1252  | -0.0569 |
| PY06079 | -0.2881 | -0.2433 | -0.3457 | -0.9722 | 0.4839  | -0.5851 | -0.306  | -0.0558 | 0.0396  | 0.0179  | 0.5575  | 0.0803  |
| PY02186 | 0.1172  | -0.086  | 0.0004  | -0.8753 | -0.292  | 0.2194  | 0.2707  | -0.1828 | -0.3612 | -0.418  | -0.4135 | 0.2407  |
| PY03709 | -0.0156 | -0.0596 | -0.2526 | 0.1822  | 0.6894  | 0.1606  | -0.2298 | -0.1168 | -0.2506 | 0.1343  | 0.097   | -0.2116 |
| PY04341 | 0.2391  | -0.0907 | 0.109   | 0.1698  | 0.2395  | 0.2619  | 0.2228  | -0.2812 | -0.2769 | 0.1832  | -0.1355 | 0.4053  |
| PY07392 | -0.0549 | 0.004   | 0.4464  | -0.7199 | -0.3099 | 0.1513  | 0.4561  | 0.0987  | 0.4456  | -0.3788 | -0.4547 | 0.3705  |
| PY05165 | -0.3841 | -0.1036 | 0.1124  | 0.8433  | -0.002  | -0.0342 | -0.2478 | 0.2668  | -0.0513 | -0.6953 | 0.2419  | -0.1117 |
| PY00682 | 0.718   | 0.3359  | 0.1015  | 0.7359  | -0.3809 | -0.4806 | -0.2265 | -0.071  | -0.0453 | -0.4391 | -0.3262 | -0.1145 |
| PY05395 | 0.5969  | 0.4008  | 0.2619  | 0.2958  | -0.1585 | -0.1454 | 0.2155  | -0.0654 | 0.0569  | -0.3476 | -0.4014 | 0.181   |
| PY01074 | 0.4105  | 0.0466  | -0.5545 | 0.0133  | -0.0399 | -0.6664 | -0.7251 | -0.4319 | -0.3945 | -0.3736 | -0.4174 | -0.1496 |
| PY00254 | -0.3009 | 0.3535  | 0.5108  | 0.3546  | 0.0876  | 0.2593  | 0.4172  | 0.0986  | 0.2206  | 0.6517  | 0.6505  | 0.0352  |
| PY06066 | -0.6363 | -0.21   | -0.3025 | -0.3477 | -0.304  | -0.5027 | -0.2152 | -0.1909 | -0.0624 | -0.336  | 0.0035  | -0.0631 |
| PY02989 | 0.1117  | -0.0154 | 0.0823  | 1.4164  | 0.2757  | 0.1066  | -0.2319 | 0.0485  | -0.0921 | 0.5907  | 0.3378  | 0.1292  |
| PY02124 | 0.4888  | -0.0042 | 0.0062  | 0.3652  | -0.1005 | -0.1521 | 0.1135  | 0.0346  | 0.1811  | -0.0922 | -0.0643 | 0.415   |
| PY02890 | -0.0324 | -0.5841 | -0.8146 | 0.0356  | 0.5524  | 0.4008  | 0.1231  | -0.3483 | -0.564  | -0.297  | -0.4949 | -0.0512 |
| PY07221 | -0.2897 | 0.0608  | 0.1093  | 0.0497  | 0.1219  | -0.1251 | -0.2376 | -0.0745 | 0.0761  | 0.1081  | -0.1051 | -0.0301 |
| PY00895 | 0.0304  | 0.2574  | 0.2627  | -0.1257 | -0.2194 | -0.2796 | 0.1744  | -0.1128 | 0.1211  | 0.1294  | 0.3088  | 0.2602  |
| PY00783 | 0.4121  | -0.0614 | 0.4302  | 0.0127  | 0.1244  | -0.1524 | -0.1677 | -0.4722 | -0.3005 | -0.3157 | -0.4092 | -0.0648 |
| PY07063 | -0.2678 | -0.1874 | -0.1544 | -0.6094 | -0.4926 | -0.354  | -0.1124 | -0.0469 | 0.0442  | 0.1864  | 0.5579  | 0.3013  |
| PY07601 | 0.5208  | -0.0142 | -0.1304 | 0.0159  | 0.286   | -0.0628 | -0.1742 | -0.0414 | -0.1382 | -0.1873 | 0.1438  | -0.0521 |
| PY00265 | -0.1149 | -0.1044 | -0.3641 | -0.091  | -0.2605 | -0.183  | -0.3744 | -0.0913 | 0.1277  | 0.183   | -0.0236 | -0.2748 |
| PY04147 | -0.8984 | 0.1269  | 0.2184  | -0.1924 | -0.2812 | -0.0883 | -0.1403 | 0.1765  | -0.1698 | -0.2295 | 0.0485  | -0.5044 |
| PY00833 | -0.0782 | 0.2378  | 0.4836  | -0.5156 | -0.426  | -0.037  | 0.3097  | -0.2059 | 0.3323  | -0.155  | -0.1583 | 0.2947  |
| PY03039 | -0.4652 | 0.3726  | 0.1054  | 0.3191  | 0.072   | 0.0621  | 0.1477  | 0.3236  | 0.057   | 0.4539  | 0.5685  | -0.0113 |
| PY06310 | -0.6024 | -0.7034 | -0.7749 | -0.2037 | 0.2121  | -0.1035 | -0.0773 | 0.2567  | 0.3012  | 0.4279  | 0.1793  | 0.1176  |

|         |         |         |         |         |         |         |         |         |         |         |         |         |
|---------|---------|---------|---------|---------|---------|---------|---------|---------|---------|---------|---------|---------|
| PY01683 | -0.8102 | -0.4001 | -0.0081 | 0.2316  | -0.0362 | -0.1105 | -0.0613 | 0.2143  | -0.4016 | 0.2415  | 0.3823  | -0.3451 |
| PY04572 | 0.3177  | 0.3366  | -0.0853 | 0.4344  | 0.179   | 0.197   | 0.1635  | -0.1878 | -0.0436 | 0       | -0.3309 | 0.0326  |
| PY05645 | -0.3911 | -0.1666 | -0.6174 | -0.0594 | 0.078   | 0.34    | -0.2717 | -0.4318 | -0.1784 | -0.2721 | -0.1532 | -0.2419 |
| PY01950 | -0.3487 | 0.0002  | -0.4723 | -0.453  | -0.2745 | -0.0868 | 0.0691  | 0.2622  | 0.2409  | -0.4018 | 0.3741  | -0.2403 |
| PY00504 | -0.1953 | -0.4825 | -0.523  | -0.2776 | -0.0553 | 0.1919  | -0.0488 | -0.1307 | -0.1378 | -0.0578 | 0.0507  | -0.1806 |
| PY02110 | -0.0026 | 0.3108  | 0.0399  | -0.0564 | 0.0058  | -0.1578 | 0.0771  | 0.2602  | 0.1154  | -0.6491 | 0.2802  | -0.0341 |
| PY05625 | 0.6371  | 0.9275  | 1.1262  | -0.0922 | -0.8211 | 0.3175  | 1.025   | 0.1838  | 0.6979  | -0.3258 | -1.1373 | 0.3072  |
| PY02534 | 0.3353  | 0.2215  | -0.0633 | 0.1192  | -0.2421 | -0.0421 | -0.2264 | -0.2771 | -0.4984 | -0.3465 | -0.4797 | -0.4678 |
| PY00017 | 0.1224  | -0.0755 | -0.2235 | 0.0651  | 0.2781  | -0.3613 | -0.4442 | -0.129  | -0.2465 | -0.0206 | 0.189   | -0.0195 |
| PY07191 | 0.154   | 0.3397  | 0.2566  | 0.1471  | -0.1242 | 0.2228  | 0.1673  | 0.0123  | 0.0847  | -0.3316 | -0.2293 | -0.0435 |
| PY04647 | -0.218  | 0.1903  | 0.487   | 0.9371  | -0.4018 | -0.2628 | 0.1347  | 0.1039  | 0.5441  | 0.216   | -0.2755 | 0.117   |
| PY06379 | -0.7112 | -0.0107 | 0.1767  | -0.0561 | -0.2743 | -0.3368 | -0.2699 | 0.0462  | 0.0728  | -0.0084 | 0.4074  | -0.3342 |
| PY04692 | -0.1691 | 0.2736  | 0.0802  | -0.5338 | -0.3392 | -0.0749 | 0.1364  | -0.1636 | 0.2173  | 0.2605  | -0.3092 | 0.5255  |
| PY00055 | 0.1366  | 0.0789  | 0.1672  | -0.4592 | 0.4008  | -0.1615 | 0.1177  | -0.4233 | -0.0794 | -0.826  | -0.0668 | -0.6252 |
| PY00033 | 0.6472  | 0.2185  | 0.3153  | 0.4035  | 0.2869  | 0.1684  | -0.0678 | -0.305  | -0.3384 | -0.0616 | -0.0841 | -0.1674 |
| PY01636 | -0.1571 | -0.3059 | -0.2652 | -0.2735 | -0.4283 | -0.7358 | -0.4489 | -0.7357 | -0.4464 | -0.7994 | -0.358  | -0.4241 |
| PY02172 | 0.6123  | 0.4118  | 0.3974  | -0.0838 | 0.1044  | -0.2916 | -0.2406 | -0.3464 | 0.0038  | -0.3193 | 0.2895  | -0.1465 |
| PY03821 | -1.3568 | 0.1011  | 0.1028  | -0.7303 | -0.3281 | -0.1491 | 0.0071  | 0.4445  | 0.0383  | -0.2516 | 0.508   | -0.412  |
| PY01388 | -1.1889 | -0.6699 | -1.1531 | -0.177  | -0.2201 | -0.2703 | -0.1224 | 0.1003  | -0.0502 | 0.5539  | 0.4308  | 0.4388  |
| PY00620 | -0.3441 | -0.4239 | -0.1397 | -0.4586 | -0.3649 | -0.2787 | 0.0495  | 0.1028  | 0.2772  | 0.03    | 0.1359  | 0.2603  |
| PY01298 | 0.3597  | 0.1335  | 0.122   | 0.0534  | 0.3306  | -0.1239 | -0.0357 | 0.5697  | -0.0433 | -0.0937 | 0.4626  | 0.244   |
| PY02577 | 0.6088  | 0.5654  | 0.5663  | 0.1159  | -0.2366 | 0.1341  | 0.6939  | 0.3236  | 0.4423  | -0.3903 | -0.3542 | 0.5383  |
| PY04309 | -0.2307 | 0.1287  | 0.0892  | 0.1098  | 0.1878  | 0.2272  | -0.0523 | 0.1231  | 0.0799  | -0.0133 | -0.3234 | 0.3104  |
| PY00338 | 0.0439  | -0.2855 | -0.1467 | 0.479   | 0.8697  | 0.1324  | 0.1504  | 0.1039  | -0.2241 | -0.0617 | 0.1259  | 0.2427  |
| PY06733 | -0.0077 | 0.0628  | -0.0305 | -0.4902 | 0.3352  | -0.0677 | -0.0084 | -0.4263 | -0.1278 | -0.5533 | -0.1885 | 0.188   |
| PY06660 | 0.6753  | 0.5113  | 0.1114  | 0.0244  | 0.2854  | 0.118   | 0.396   | -0.1573 | 0.3311  | -0.4147 | -0.2342 | 0.069   |
| PY04842 | 0.5706  | 0.026   | 0.0609  | 0.2561  | -0.1754 | -0.6134 | -0.2984 | -0.2883 | -0.0601 | -0.0019 | 0.0139  | -0.0967 |
| PY06670 | -0.11   | -0.433  | -1.0747 | -0.152  | 0.7473  | 0.0355  | -0.3853 | 0.1586  | -0.2785 | 0.2061  | -0.0194 | 0.0394  |
| PY04457 | -0.1317 | 0.2981  | -0.0984 | -0.752  | -0.2668 | 0.0864  | 0.1445  | 0.1044  | 0.147   | -0.2769 | 0.2418  | -0.2834 |
| PY06683 | 0.3752  | 0.2981  | 0.4915  | -0.0443 | -0.3875 | -0.0046 | 0.3792  | 0.1208  | 0.357   | 0.3158  | -0.5808 | 0.6218  |
| PY04863 | -0.6596 | 0.0223  | 0.1228  | -0.4397 | -0.2888 | 0.6352  | 0.403   | 0.4185  | 0.2756  | 0.0408  | 0.0847  | -0.1478 |
| PY02193 | -0.077  | 0.175   | 0.1256  | -0.6619 | -0.075  | 0.1542  | -0.0457 | -0.1531 | 0.1015  | 0.3444  | -0.2805 | 0.3359  |
| PY00509 | -2.0227 | -0.8901 | -0.6995 | -0.9048 | -0.574  | -0.4154 | -0.2786 | 0.2834  | 0.366   | 0.171   | 0.5477  | -0.3987 |
| PY00743 | -0.2095 | -0.0358 | 0.0295  | 0.6367  | -0.1628 | -0.5858 | -0.4    | -0.0667 | -0.3246 | 0.2969  | 0.7586  | 0.0507  |
| PY01205 | 0.0979  | 0.1132  | 0.2774  | 0.2938  | -0.085  | -0.2156 | -0.2545 | -0.1958 | -0.2523 | -0.2977 | -0.3502 | -0.0764 |
| PY00948 | 0.1871  | 0.0824  | 0.0595  | 0.0436  | 1.0624  | -0.0974 | -0.0951 | -0.1464 | -0.1243 | -0.1653 | -0.1524 | 0.0044  |
| PY02301 | 1.1594  | 0.2883  | 0.7429  | 0.0707  | -0.0946 | 0.0556  | 0.3358  | 0.1935  | 0.3302  | -0.2079 | -0.2347 | 0.1735  |
| PY07440 | 0.5538  | 0.1912  | 0.2547  | -0.0964 | 0.071   | -0.0507 | 0.0118  | -0.1743 | -0.274  | -0.3715 | -0.6538 | 0.1531  |
| PY03705 | -0.1172 | -0.0638 | 0.1948  | -0.2443 | -0.3045 | 0.1695  | -0.001  | 0.0972  | 0.4434  | 0.1958  | 0.0894  | 0.0484  |
| PY06753 | 0.0741  | 0.157   | 0.2095  | 0.4177  | 0.1891  | 0.4721  | 0.357   | -0.2007 | -0.1482 | -0.1038 | -0.1571 | -0.2741 |
| PY00207 | -0.0198 | -0.0858 | 0.0379  | -0.0882 | -0.1337 | -0.0353 | -0.4352 | -0.1039 | -0.1264 | -0.0124 | 0.2947  | 0.2269  |
| PY03379 | 0.2497  | 0.2493  | -0.072  | -0.1732 | 0.2953  | -0.0698 | 0.2123  | 0.1764  | 0.2772  | 0.1443  | 0.0145  | 0.4483  |
| PY00041 | -0.9891 | -0.3532 | -0.0394 | 0.2581  | 0.4155  | 0.022   | -0.1278 | 0.1796  | -0.1327 | 0.3429  | 0.887   | 0.0083  |
| PY07109 | -0.8822 | -0.3457 | 0.0399  | 0.3336  | -0.6222 | -0.3439 | 0.1595  | 0.479   | 0.5821  | 0.1032  | 0.4191  | -0.0323 |
| PY07032 | 0.2057  | 0.2022  | 0.3322  | 0.3606  | 0.1694  | 0.0978  | 0.0498  | -0.3031 | 0.0004  | 0.2353  | -0.143  | 0.1158  |
| PY03727 | -0.6055 | -0.3459 | -0.0195 | 0.6936  | 0.388   | 0.3714  | 0.1419  | 0.4998  | 0.2831  | 0.554   | 1.091   | 0.1887  |
| PY01246 | -0.0229 | -0.1572 | 0.1335  | -0.2948 | -0.0082 | -0.2336 | -0.0237 | -0.0674 | 0.0152  | 0.0256  | -0.1552 | -0.0596 |
| PY02254 | -0.4692 | -0.1655 | 0.0008  | -0.0292 | -0.0681 | -0.1964 | 0.0818  | 0.2652  | 0.23    | 0.3992  | 0.3093  | 0.0415  |
| PY02802 | 0.1101  | 0.0924  | 0.1348  | 0.4176  | 0.0257  | -0.0639 | 0.1381  | 0.2733  | 0.0082  | 0.0707  | 0.1558  | 0.0311  |
| PY02262 | -0.1879 | 0.0221  | -0.1816 | -0.7745 | -0.3581 | -0.4612 | -0.3302 | -0.1265 | -0.0839 | 0.3641  | 0.4783  | 0.1282  |
| PY01888 | -0.7509 | -0.3602 | -0.1842 | -0.5976 | -0.8846 | -0.4763 | -0.4326 | 0.2139  | 0.5187  | 0.2693  | 0.4747  | 0.6519  |
| PY02604 | -0.572  | -0.0425 | -0.7812 | -0.2937 | -0.2549 | -0.054  | -0.1637 | 0.2319  | 0.0006  | -0.1343 | -0.0401 | -1.0679 |
| PY01823 | -0.1083 | -0.1509 | -0.0129 | -0.2109 | -0.107  | -0.1916 | -0.3352 | 0.0157  | -0.2161 | 0.2109  | -0.0274 | -0.0657 |
| PY01831 | -0.5286 | -0.2993 | -0.0617 | -0.1414 | -0.0438 | 0.1713  | -0.0121 | -0.0454 | 0.0882  | 0.378   | 0.3121  | 0.0283  |
| PY02100 | -0.3416 | 0.0237  | 0.0484  | -0.2775 | -0.9981 | -0.2173 | -0.2473 | -0.0186 | 0.0765  | -0.5769 | 0.1115  | -0.1035 |
| PY03677 | 0.683   | 0.3585  | -0.1666 | -0.1856 | -0.1284 | -0.1414 | -0.3149 | -0.3205 | -0.4312 | -0.424  | -0.3805 | -0.6327 |
| PY04182 | -0.361  | -0.2859 | -0.2534 | 0.2416  | 0.5665  | 0.1194  | 0.0124  | 0.2162  | 0.0205  | 0.3788  | -0.2021 | -0.0852 |
| PY03523 | 1.0476  | 0.6615  | 0.9018  | 0.3654  | -0.1997 | -0.1277 | 0.2943  | -0.0528 | 0.4069  | -0.0723 | -0.6134 | 0.5559  |
| PY07266 | -0.2611 | -0.0323 | 0.1401  | -0.742  | -0.2885 | -0.035  | 0.0569  | -0.2957 | 0.3417  | -0.4331 | 0.2673  | 0.0181  |
| PY02667 | 0.4124  | 0.8381  | 1.0425  | -0.6342 | -0.5819 | -0.2165 | -0.2165 | -0.3589 | -0.1669 | -0.3516 | -0.5819 | -0.3706 |
| PY03156 | -0.7336 | -0.5236 | -0.4745 | -0.3432 | -0.3018 | -0.5829 | -0.0334 | 0.113   | 0.6207  | 0.2708  | 0.4175  | 0.9849  |
| PY07238 | -0.5583 | -0.0877 | 0.3161  | 0.4849  | 0.183   | 0.3057  | 0.029   | 0.3548  | 0.1112  | 0.4522  | 0.2185  | -0.0167 |
| PY05116 | 0.3281  | 0.1021  | -0.0433 | -0.0096 | 0.0841  | -0.0738 | 0.0041  | -0.1685 | 0.2991  | 0.0464  | -0.2725 | 0.1241  |

|         |         |         |         |         |         |         |         |         |         |         |         |         |
|---------|---------|---------|---------|---------|---------|---------|---------|---------|---------|---------|---------|---------|
| PY02015 | -0.3509 | -0.0372 | -0.3687 | -0.952  | -0.6472 | -0.2734 | 0.0375  | 0.0408  | 0.4342  | 0.009   | -0.167  | 0.2172  |
| PY03215 | 0.5885  | 0.1943  | 0.5315  | 1.0733  | -0.0011 | 0.2885  | 0.1823  | -0.1271 | 0.1606  | -0.0113 | -0.4882 | -0.0497 |
| PY05521 | 0.1072  | -0.0242 | 0.1171  | -0.141  | -0.0716 | -0.2102 | -0.0704 | -0.2723 | -0.1638 | 0.2399  | -0.0014 | 0.0553  |
| PY04166 | -0.3485 | -0.0725 | -0.3098 | 0.3578  | -0.4173 | -0.2384 | -0.0897 | 0.2892  | 0.4158  | 0.2036  | 0.3235  | 0.2245  |
| PY07100 | 0.02    | -0.0527 | -0.1672 | -0.1061 | 0.0404  | -0.0928 | -0.2851 | -0.1037 | -0.2279 | -0.4102 | -0.0395 | -0.4029 |
| PY05339 | -0.8128 | 0.1078  | 0.3639  | -0.7142 | -0.6122 | -0.5788 | -0.4111 | -0.2091 | -0.089  | -0.5243 | 0.2565  | -0.4407 |
| PY04766 | 0.1897  | 0.0318  | -0.0757 | -0.7446 | 0.354   | 0.0087  | -0.1447 | -0.6706 | -0.1588 | 0.0565  | -0.9592 | 0.0394  |
| PY01546 | 0.8781  | 0.3777  | 0.2714  | 0.4576  | 0.3538  | 0.1749  | -0.0097 | -0.0294 | -0.364  | 0.181   | 0.1857  | 0.0563  |
| PY04802 | 0.1992  | 0.2928  | 0.7222  | -0.7517 | -0.2452 | -0.3031 | -0.1879 | -0.3293 | -0.3658 | -0.5602 | -0.5794 | -0.2484 |
| PY01479 | -0.5574 | -0.3855 | -0.209  | -0.4614 | 0.1823  | -0.0187 | -0.0097 | -0.0567 | -0.0174 | -0.092  | 0.1075  | 0.1018  |
| PY03870 | -0.0793 | -0.0612 | -0.2175 | -0.3591 | -0.3725 | -0.3962 | -0.203  | -0.1135 | -0.1114 | 0.1823  | 0.6278  | 0.0631  |
| PY00972 | 0.0678  | -0.0022 | -0.0859 | -0.3773 | -0.108  | 0.2979  | 0.1836  | -0.095  | -0.0468 | -0.1959 | -0.4174 | -0.1321 |
| PY01940 | -0.3605 | -0.3995 | -0.4431 | 0.1399  | -0.3106 | 0.1846  | -0.0205 | 0.0864  | -0.1079 | 0.4453  | -0.1875 | -0.1592 |
| PY03451 | 0.0972  | 0.0831  | -0.1126 | 0.0162  | 0.7893  | 0.523   | 0.4361  | 0.2309  | -0.0751 | -0.2197 | -0.6479 | -0.0659 |
| PY01515 | 0.64    | 0.1248  | -0.3629 | 1.12    | 0.0885  | 0.1294  | -0.3162 | -0.3356 | -0.5193 | -0.2898 | -0.7336 | -0.5354 |
| PY01845 | -0.358  | -0.0063 | -0.1208 | -0.2948 | -0.0522 | 0.0773  | 0.0181  | -0.0881 | -0.157  | -0.1947 | 0.0299  | -0.2063 |
| PY01631 | 0.1643  | -0.0652 | 0.0004  | -0.4737 | -0.3535 | 0.1796  | -0.0029 | -0.3181 | -0.2966 | -0.0474 | -0.1597 | -0.0031 |
| PY06729 | 0.3858  | 0.2056  | 0.4048  | -0.2583 | -0.0206 | 0.1124  | 0.3694  | -0.0201 | 0.5335  | -0.1624 | -0.1505 | 0.5788  |
| PY06252 | 0.6396  | 0.2527  | 0.1558  | -0.07   | -0.1873 | 0.0836  | -0.1181 | -0.104  | -0.1932 | 0.1708  | -0.1174 | -0.043  |
| PY05311 | 0.6791  | 0.3473  | 0.3059  | 0.0379  | -0.2425 | -0.0468 | -0.0679 | -0.3458 | 0.147   | -0.2007 | -0.4399 | -0.1772 |
| PY02401 | 0.897   | 0.1519  | -0.1377 | -0.5051 | -0.3161 | 0.1072  | 0.0021  | -0.3633 | -0.3023 | -0.5994 | -0.5598 | 0.3437  |
| PY01672 | -0.7673 | -0.238  | -0.1086 | -0.088  | 0.0864  | -0.1468 | 0.0041  | -0.0106 | -0.0576 | -0.0045 | 0.247   | 0.0811  |
| PY04801 | -0.0417 | -0.3357 | -0.2722 | -0.2042 | -0.1383 | -0.2554 | 0.0892  | 0.0219  | 0.1034  | -0.0508 | 0.0241  | 0.3064  |
| PY07363 | -0.2224 | -0.0572 | 0.0054  | 0.2428  | 0.1555  | -0.2233 | -0.288  | -0.0274 | -0.2487 | 0.1786  | 0.0691  | 0.0997  |
| PY03444 | -0.5387 | -0.0031 | 0.0638  | 0.2663  | 0.0317  | -0.0816 | 0.1659  | 0.0984  | -0.0179 | 0.1885  | 0.3965  | -0.0527 |
| PY03779 | 0.3433  | 0.1342  | -0.0293 | 0.0944  | 0.2571  | -0.2235 | -0.1511 | -0.3188 | -0.2517 | -0.1298 | -0.4308 | -0.0971 |
| PY00709 | 0.0081  | 0.3072  | 0.3621  | 0.2303  | 0.4469  | -0.1577 | 0.0635  | 0.0389  | -0.1538 | 0.6538  | 0.5023  | 0.1645  |
| PY03547 | 0.7196  | 0.4471  | 0.6155  | -0.1269 | -0.0264 | 0.0864  | 0.1934  | -0.2779 | 0.0734  | -0.2639 | -0.3472 | -0.046  |
| PY02236 | 0.8277  | 0.6907  | 0.9271  | 0.5845  | -0.5396 | 0.3712  | 0.2577  | -0.0947 | 0.0412  | -0.3337 | -0.8993 | -0.334  |
| PY01860 | 0.1644  | 0.1545  | 0.2468  | 0.0236  | 0.2044  | 0.2505  | 0.0712  | 0.1561  | -0.1131 | -0.3466 | -0.146  | 0.0587  |
| PY03937 | -0.0524 | -0.1457 | -0.3037 | -0.2062 | 0.173   | -0.1829 | 0.0526  | 0.0217  | 0.1948  | 0.2365  | 0.2581  | 0.1383  |
| PY03923 | 0.0566  | -0.4824 | -0.0426 | 0.205   | 0.8866  | 0.1865  | -0.0388 | -0.0312 | -0.1684 | -0.0158 | 0.3859  | 0.0182  |
| PY00713 | 0.4475  | 0.494   | 0.0692  | 0.0919  | 0.2201  | 0.1383  | -0.4305 | 0.055   | -0.1962 | 0.2837  | -0.0543 | 0.2313  |
| PY00511 | -0.5549 | -0.2527 | 0.399   | 0.6389  | -0.2526 | -0.0136 | -0.0055 | 0.5743  | -0.0848 | 0.5886  | 0.6005  | -0.2047 |
| PY05326 | 0.4598  | 0.1682  | -0.154  | 0.3539  | 0.1411  | -0.1572 | -0.0138 | 0.0055  | -0.1334 | -0.2322 | -0.0427 | -0.0929 |
| PY03475 | -0.9377 | -0.326  | -0.267  | -0.2656 | -0.0303 | 0.4865  | 0.2121  | 0.8194  | 0.5406  | 1.0857  | 1.572   | 0.1527  |
| PY00698 | 0.4243  | 1.1353  | 0.2447  | -0.0546 | -0.3796 | -0.4617 | 0.3336  | -0.0961 | 0.1918  | 0.2405  | -0.3327 | -0.1593 |
| PY04099 | -0.0983 | -0.008  | 0.2349  | 0.2697  | 0.2207  | -0.0742 | -0.1543 | -0.08   | -0.178  | 0.25    | -0.1502 | 0.0528  |
| PY02430 | 0.215   | 0.2949  | 0.2141  | 0.9774  | -0.4467 | 0.3092  | 0.314   | 0.1991  | 0.115   | -0.6976 | -0.3049 | 0.2401  |
| PY02474 | 0.4721  | 0.0989  | 0.5153  | 0.6824  | 0.2893  | 0.4268  | -0.0165 | 0.6285  | -0.0567 | 0.7511  | -0.118  | 0.0683  |
| PY00803 | 0.0196  | -0.1735 | -0.0692 | 0.0728  | -0.1213 | -0.1555 | -0.024  | 0.1199  | 0.2592  | -0.0988 | 0.1456  | -0.1441 |
| PY03051 | 0.3314  | 0.0405  | 0.0347  | 0.2981  | 0.3478  | 0.362   | 0.0524  | -0.0232 | 0.0458  | -0.0965 | -0.2187 | 0.0474  |
| PY01344 | 0.31    | 0.1383  | -0.0551 | -0.0909 | 0.1382  | 0.3153  | 0.1797  | -0.0651 | 0.0368  | 0.1909  | -0.0982 | 0.2375  |
| PY02705 | 0.7489  | 0.265   | 0.6792  | 0.1933  | 0.2199  | 0.3339  | 0.1646  | 0.1553  | 0.2498  | 0.2941  | 0.0489  | 0.2395  |
| PY01017 | -0.3063 | -0.146  | 0.1526  | 0.0402  | -0.135  | 0.089   | 0.2712  | 0.5342  | 0.2949  | 0.1402  | 0.5381  | -0.0501 |
| PY06228 | 0.1294  | -0.1618 | -0.3467 | 1.0082  | -0.4129 | -0.1447 | -0.0624 | 0.4339  | -0.5807 | 1.2168  | -0.1008 | 0.0558  |
| PY03994 | -0.0773 | -0.0463 | -0.1787 | 1.02    | 0.0922  | -0.3793 | -0.0823 | 0.3735  | 0.245   | 0.5802  | 1.0993  | 0.2441  |
| PY06765 | 0.4661  | 0.4823  | 0.3976  | -0.3839 | -0.6505 | -0.1335 | 0.1626  | -0.4838 | 0.0658  | -0.7867 | -0.8848 | 0.1051  |
| PY00933 | -0.1443 | -0.1968 | 0.0617  | 0.9367  | -0.2854 | 0.1348  | -0.1962 | 0.1822  | -0.0302 | 0.2757  | -0.1976 | -0.0215 |
| PY05824 | 0.5634  | 0.408   | -0.1276 | -0.595  | -0.4402 | -0.2586 | -0.1724 | -0.132  | -0.0686 | -0.8442 | 0.0305  | -0.2933 |
| PY00360 | 0.7578  | 0.501   | 0.3624  | 0.4425  | 0.015   | 0.1453  | 0.3263  | -0.1367 | 0.3892  | 0.0907  | -0.471  | 0.3467  |
| PY05349 | 0.0909  | -0.022  | 0.0337  | -0.3653 | -0.022  | -0.3255 | -0.0941 | -0.2414 | -0.2032 | -0.5742 | 0.2642  | -0.4235 |
| PY01212 | -0.0513 | -0.3202 | -0.4326 | 0.0434  | 0.1712  | -0.8497 | -0.0762 | 0.0599  | -0.5905 | -0.008  | -0.089  | 0.053   |
| PY02752 | 0.0462  | -0.0895 | -0.1904 | -0.253  | -0.0636 | -0.3072 | -0.3189 | -0.2245 | -0.5515 | 0.0236  | 0.1967  | -0.1527 |
| PY02151 | -0.3272 | -0.094  | 0.0173  | 0.661   | 0.6927  | 1.159   | -0.0959 | 0.7972  | 0.0454  | 1.4896  | 1.4268  | 0.1697  |
| PY00006 | -0.2265 | -0.3819 | -0.5714 | 0.1612  | 0.6212  | -0.0387 | -0.3413 | -0.166  | -0.1294 | 0.2997  | -0.0571 | -0.0718 |
| PY06309 | -0.8971 | -0.1013 | 0.0322  | -0.3202 | -0.1787 | -0.1858 | -0.0398 | 0.2993  | 0.0686  | -0.1406 | 0.4334  | -0.4589 |
| PY00032 | 0.067   | 0.0232  | -0.0459 | -0.5009 | 0.0326  | -0.1164 | -0.052  | -0.1577 | -0.3588 | -0.2505 | 0.0723  | -0.1787 |
| PY00022 | 0.1642  | 0.0672  | -0.0347 | 0.2315  | -0.3135 | -0.2973 | 0.2705  | 0.1398  | 0.1595  | -0.114  | -0.4695 | 0.4618  |
| PY02637 | 0.5028  | 0.304   | 0.606   | 0.0417  | -0.1763 | 0.1692  | 0.0334  | -0.3113 | 0.146   | -0.3718 | -0.4157 | -0.0917 |
| PY07507 | 0.8067  | 0.2917  | -0.1191 | 0.8378  | 0.0987  | 0.0925  | 0.2573  | 0.0251  | 0.3961  | 0.0866  | -0.2014 | 0.6759  |
| PY01181 | -0.9863 | -0.2355 | -0.3492 | -0.3204 | -0.3838 | -0.3679 | -0.0192 | 0.5073  | 0.1789  | -0.0144 | 0.7434  | -0.507  |
| PY01995 | 0.0503  | -0.1712 | -0.0799 | 0.9674  | 0.0463  | 0.1882  | 0.1797  | 0.1544  | 0.1753  | 0.2662  | 0.0402  | 0.127   |

|         |         |         |         |         |         |         |         |         |         |         |         |         |
|---------|---------|---------|---------|---------|---------|---------|---------|---------|---------|---------|---------|---------|
| PY03537 | 1.0238  | 0.4187  | 0.7016  | 0.0309  | -0.0031 | 0.0866  | 0.7731  | -0.0099 | 0.3433  | 0.4116  | -0.2591 | 0.4723  |
| PY03509 | 0.1506  | -0.0973 | 0.0858  | 0.5589  | 0.1841  | 0.1485  | -0.0559 | -0.0363 | 0.1296  | 0.1715  | 0.3709  | 0.2208  |
| PY06248 | -0.3391 | -0.1848 | -0.5225 | 0.6737  | 0.1903  | 0.0356  | -0.2279 | 0.6024  | 0.3214  | 0.4648  | 0.9659  | 0.769   |
| PY06207 | -0.9776 | -0.4491 | -0.0988 | -0.965  | -0.2964 | -0.4077 | -0.3599 | -0.0588 | -0.0894 | 0       | 0.7463  | -0.3859 |
| PY00604 | -0.1496 | 0.185   | -0.5988 | -0.5506 | -0.8188 | -0.5391 | 0.2389  | 0.4027  | 0.4452  | 0.4797  | 1.0903  | 0.3183  |
| PY06536 | 0.358   | -0.0712 | -0.1086 | -0.0881 | -0.2028 | -0.0462 | -0.0579 | -0.1436 | -0.1582 | -1.7773 | -0.3997 | -0.2466 |
| PY01044 | -0.4662 | -0.6869 | -0.2724 | -0.3723 | -0.376  | 0.076   | 0.216   | 0.0234  | 0.4075  | -0.1041 | -0.1914 | 0.026   |
| PY00517 | -0.8882 | 0.2987  | -0.0674 | -0.4516 | -0.0684 | 0.0608  | 0.2074  | 0.5844  | 0.2419  | 0.5774  | 1.3002  | 0.2593  |
| PY05066 | 1.2019  | 0.6366  | 1.0039  | 0.3697  | 1.1264  | 0.0881  | 0.4474  | 0.0336  | 0.2577  | 0.2987  | 0.0449  | 0.406   |
| PY06443 | 1.0344  | 0.3108  | -0.1519 | 0.6026  | -0.7265 | 0.2325  | -0.0894 | -0.0676 | 0.0733  | -0.2101 | -0.2595 | -0.2922 |
| PY05519 | -0.7374 | -0.2306 | 0.0721  | -0.2952 | -0.2556 | -0.1735 | -0.1995 | 0.0874  | 0.1369  | 0.2852  | 0.3178  | 0.1408  |
| PY04015 | -0.1755 | -0.0694 | -0.0618 | 0.1815  | 0.1463  | 0.3847  | 0.2215  | 0.146   | 0.0275  | 0.1583  | -0.0976 | 0.0708  |
| PY04012 | 0.0783  | 0.3448  | 0.1614  | -0.2217 | 0.2795  | -0.061  | 0.2658  | -0.0985 | 0.292   | -0.4046 | 0.0935  | -0.1187 |
| PY06546 | 0.0818  | 0.0775  | -0.0192 | 0.2203  | -0.3946 | -0.091  | 0.1055  | 0.3453  | 0.2073  | -0.1797 | 0.913   | -0.0306 |
| PY04187 | 0.4193  | 0.4372  | -0.0886 | -1.4452 | -0.7046 | -0.19   | 0.0509  | -0.6766 | -0.174  | -1.1788 | -0.9396 | 0.0481  |
| PY06841 | -0.9129 | 0.0241  | 0.8688  | 0.2772  | 0.0388  | 0.1899  | 0.1528  | 0.2788  | 0.3208  | 0.2585  | 0.5461  | 0.1583  |
| PY02945 | -0.0927 | -0.036  | 0.1367  | -0.0947 | 0.0494  | 0.0714  | 0.3144  | 0.1243  | 0.2715  | -0.0128 | -0.1009 | 0.097   |
| PY05403 | -0.2887 | -0.0858 | -0.0346 | -0.2827 | 0.276   | -0.1762 | 0.2377  | -0.2818 | 0.4627  | -0.3983 | 0.2554  | 0.1741  |
| PY06867 | -0.4822 | 0.0231  | 0.2468  | -0.3425 | -0.7204 | -0.0712 | 0.1986  | 0.2862  | 0.3132  | 0.0208  | 0.4117  | -0.0673 |
| PY06415 | 0.2036  | 0.1371  | -0.0817 | 0.3559  | -0.0232 | -0.1553 | -0.2497 | -0.266  | -0.2086 | 0.047   | -0.5594 | 0.3127  |
| PY00234 | 0.9257  | 0.1703  | -0.0772 | 0.1431  | 0.1282  | 0.0964  | 0.11    | 0.092   | -0.6905 | -0.1241 | -0.0123 | 0.1037  |
| PY02111 | 0.2299  | 0.3104  | -0.0277 | -0.5085 | -0.0211 | -0.0285 | -0.0381 | -0.1911 | -0.1026 | -0.1391 | 0.0101  | 0.0623  |
| PY02736 | 0.6954  | 0.4495  | -0.1969 | 0.2822  | 0.1095  | 0.0105  | 0.1136  | -0.0613 | -0.0466 | -0.0217 | 0.0467  | 0.1383  |
| PY01735 | -0.001  | -0.0447 | -0.169  | 0.1781  | -0.2242 | 0.0641  | 0.2242  | 0.308   | 0.1511  | -0.3596 | -0.111  | 0.3004  |
| PY03251 | -0.1415 | 0.0527  | 0.0748  | 0.4507  | -0.2305 | -0.2333 | -0.401  | 0.0789  | 0.177   | 0.4489  | 0.2708  | 0.2894  |
| PY00572 | -0.0503 | 0.184   | -0.0474 | -0.4279 | -0.5809 | -0.337  | 0.0313  | -0.1627 | -0.1777 | -0.2789 | -0.1243 | -0.2336 |
| PY06780 | -0.2137 | 0.1155  | -0.0756 | 0.4142  | 0.1976  | -0.2556 | 0.0893  | -0.3915 | 0.1354  | 0.3822  | 1.1321  | 0.1067  |
| PY07059 | 0.5063  | 0.1316  | 0.3019  | 0.1283  | 0.1588  | 0.1273  | 0.3853  | -0.1815 | -0.1234 | 0.0295  | 0.0527  | 0.2198  |
| PY04474 | -0.1668 | -0.3668 | -0.371  | -0.4146 | -0.1844 | -0.2108 | 0.019   | -0.2106 | 0.1009  | 0.4668  | 0.14    | 0.3878  |
| PY04299 | -1.0455 | -0.2428 | 0.015   | -0.4035 | 0.0532  | 0.0745  | -0.1041 | 0.2734  | 0.014   | 0.251   | 0.549   | -0.219  |
| PY01112 | -0.3979 | 0.0304  | 0.2582  | -0.689  | -0.2729 | -0.1406 | -0.0964 | -0.026  | 0.1732  | -0.3096 | 0.5731  | -0.1164 |
| PY06712 | 0.0962  | 0.0501  | 0.031   | -0.0123 | 0.0632  | 0.0288  | -0.0825 | -0.2038 | 0.0425  | 0.0898  | -0.4002 | 0.0405  |
| PY03135 | 0.0815  | 0.1116  | -0.0338 | 1.7202  | 0.9735  | 0.9486  | 0.085   | 0.622   | 0.1059  | 0.6263  | 1.0198  | 0.0838  |
| PY01183 | 0.0569  | 0.0373  | -0.2835 | 0.667   | 0.3677  | -0.2197 | 0.2512  | 0.3168  | 0.0931  | 0.1125  | 0.8142  | 0.2686  |
| PY03939 | 0.2221  | -0.1494 | 0.1529  | 0.3258  | 0.3642  | -0.0022 | 0.1272  | -0.3563 | 0.0214  | -0.0306 | -0.6989 | 0.0997  |
| PY02120 | 0.0594  | -0.0084 | -0.0278 | -0.0044 | 0.0068  | 0.0409  | -0.1153 | -0.0873 | 0.1085  | 0.4822  | -0.2016 | -0.134  |
| PY03506 | -0.1335 | 0.1185  | #####   | -0.3367 | -0.3017 | 0.0723  | 0.2912  | 0.1748  | 0.5451  | 0.0978  | -0.1551 | 0.3268  |
| PY05312 | 0.2767  | 0.103   | 0.3211  | 0.0426  | -0.7862 | -0.0929 | -0.3948 | -0.2733 | -0.2478 | -0.926  | -0.4286 | -0.3417 |
| PY00708 | -0.2879 | -0.0148 | -0.0341 | 0.7091  | 0.0859  | -0.1313 | -0.0411 | 0.1792  | -0.6821 | 0.2359  | 0.0453  | 0.0069  |
| PY02704 | 0.3609  | 0.1953  | 0.0959  | -0.2556 | -0.2735 | 0.1255  | 0.2686  | -0.1968 | 0.12    | -0.2167 | -0.3277 | 0.1026  |
| PY06321 | 0.329   | 0.3977  | 0.1806  | -0.8169 | -0.0401 | -0.1716 | -0.0521 | -0.1583 | 0.1889  | -0.4106 | -0.103  | -0.3249 |
| PY06726 | -0.1365 | 0.0244  | 0.046   | 0.3011  | 0.1672  | 0.0146  | -0.3408 | 0.0531  | -0.4849 | -0.6128 | -0.2776 | -0.3183 |
| PY05496 | -0.8219 | -1.0208 | -0.9317 | -0.8025 | 0.0325  | 0.2177  | 0.1575  | 0.2868  | 0.3676  | 0.5381  | 0.5247  | 0.0071  |
| PY04881 | -0.1518 | -0.0216 | 0.1637  | 0.0501  | 0.1069  | -0.0584 | 0.2597  | 0.033   | 0.22    | 0.0915  | 0.2997  | 0.15    |
| PY04682 | 0.2616  | 0.0547  | 0.2221  | 0.214   | 0.2275  | 0.2558  | 0.2218  | 0.1286  | 0.2214  | 0.0496  | 0.0734  | -0.1012 |
| PY05157 | 0.8326  | 0.4139  | 0.5653  | 0.0496  | 0.0417  | 0.2238  | 0.4336  | -0.0352 | 0.1217  | -0.2079 | -0.2682 | 0.2187  |
| PY04570 | -0.2899 | -0.4899 | -0.9278 | 0.1488  | -0.0178 | 0.1657  | 0.0752  | 0.3537  | -0.0061 | -0.2474 | 0.3269  | 0.0162  |
| PY01660 | -0.6042 | -0.2745 | -0.5053 | 0.9817  | 0.2992  | 0.3257  | -0.0769 | 0.2468  | -0.167  | -1.5066 | 0.1213  | -0.2805 |
| PY03474 | -0.4566 | -0.0776 | 0.0245  | 0.1639  | 0.4156  | 0.4915  | 0.1388  | 0.2379  | -0.0996 | -0.1722 | 0.0958  | -0.556  |
| PY07508 | 0.0429  | 0.0356  | -0.0304 | 0.0812  | -0.0522 | -0.4777 | -0.3855 | -0.4097 | -0.1588 | -0.3928 | -0.2822 | -0.2488 |
| PY00935 | -0.3451 | -0.1025 | 0.2583  | -0.436  | -0.121  | -0.0207 | -0.217  | 0.1182  | -0.177  | 0.0364  | -0.1472 | -0.2315 |
| PY00157 | -0.0381 | -0.0731 | 0.3232  | 0.0861  | 0.383   | 0.0198  | -0.0793 | -0.0283 | 0.1323  | 0.8558  | 0.2585  | 0.2168  |
| PY04688 | -0.0156 | 0.0766  | -0.0424 | -0.4849 | -0.0128 | -0.3505 | -0.3029 | -0.1205 | 0.2023  | -0.0356 | 0.0844  | 0.1621  |
| PY01527 | -0.1448 | -0.0631 | 0.1496  | -0.0887 | -0.1198 | 0.1894  | 0.0643  | 0.1232  | 0.0279  | -0.2573 | -0.0958 | 0.171   |
| PY04607 | -0.6409 | -0.2763 | -0.1417 | -0.7707 | 0.6886  | 0.3079  | 0.3502  | 0.2052  | -0.2646 | -0.224  | 0.3823  | -0.2208 |
| PY05438 | -0.294  | 0.0257  | -0.1502 | 0.347   | -0.2469 | 0.0487  | 0.3151  | 0.0579  | 0.3374  | 0.3624  | -0.3844 | -0.0696 |
| PY00129 | -0.223  | -0.2509 | -0.4077 | 1.132   | 0.8956  | 0.0976  | -0.2192 | -0.2827 | -0.2328 | 0.617   | 0.7066  | 0.2261  |
| PY03878 | -0.6363 | 0.0209  | 0.2141  | 0.2352  | 0.2452  | 0.1756  | 0.0177  | 0.0505  | 0.0944  | 0.0779  | 0.1167  | -0.0973 |
| PY04436 | 0.3229  | 0.2829  | 0.364   | 0.0457  | 0.1995  | 0.2711  | 0.1706  | -0.2376 | -0.0763 | -0.0899 | -0.6387 | 0.1018  |
| PY05371 | -0.0805 | 0.1486  | 0.235   | -0.217  | -0.6226 | 0.2927  | 0.5862  | 0.143   | 0.2063  | 0.2114  | -0.5905 | 0.2159  |
| PY04834 | 0.4232  | 0.0387  | 0.3096  | -0.1977 | -0.0668 | -0.0864 | -0.1188 | -0.18   | -0.1432 | -0.1944 | -0.2249 | -0.0473 |
| PY01230 | -0.4629 | 0.1171  | 0.0038  | -0.2466 | 0.0785  | 0.0063  | -0.0509 | 0.0121  | -0.0819 | -0.1536 | 0.45    | -0.0917 |
| PY01370 | -0.2959 | -0.0336 | -0.2447 | 0.501   | 0.3436  | -0.0194 | -0.0905 | 0.1668  | -0.2271 | 0.1058  | 0.4107  | -0.0598 |

|         |         |         |         |         |         |         |         |         |         |         |         |         |
|---------|---------|---------|---------|---------|---------|---------|---------|---------|---------|---------|---------|---------|
| PY02442 | 0.1882  | 0.0636  | 0.0282  | 0.0724  | -0.092  | 0.2163  | 0.299   | 0.0475  | 0.2631  | 0.0422  | 0.0193  | 0.4396  |
| PY01480 | 1.0975  | 0.7155  | 0.6693  | 0.088   | -0.2223 | 0.159   | 0.3143  | -0.2819 | 0.2187  | -0.1273 | -0.4303 | 0.5047  |
| PY01891 | 0.2494  | 0.3007  | 0.3664  | 0.4804  | 0.3918  | 0.2049  | -0.0616 | -0.2909 | -0.2224 | -0.2092 | -0.596  | -0.2823 |
| PY02609 | -0.6002 | -0.3998 | -0.999  | -0.7289 | -0.1482 | -0.0492 | 0.0337  | 0.2835  | 0.0029  | 0.3141  | 0.1258  | 0.2093  |
| PY07550 | 0.2654  | -0.0232 | -0.1446 | -0.0118 | -0.0412 | -0.2271 | -0.0733 | 0.0514  | 0.2433  | 0.3091  | 0.2742  | 0.4562  |
| PY03056 | -0.0899 | 0.0056  | 0.1173  | 0.7459  | 0.7342  | 1.0178  | -0.0343 | 0.5916  | 0.0509  | 0.6214  | 1.0848  | -0.1126 |
| PY00745 | -0.1047 | -0.3009 | -0.324  | 0.4788  | 0.1923  | -0.0777 | -0.1766 | 0.228   | -0.1225 | 0.4276  | 0.2642  | 0.1333  |
| PY04375 | -0.3374 | 0.0816  | 0.2082  | 0.1721  | 0.1146  | 0.3526  | 0       | -0.1893 | 0.1029  | 0.2036  | -0.5315 | -0.0862 |
| PY07193 | 0.8675  | 0.5656  | 0.981   | 0.1858  | -0.5966 | 0.0758  | 0.4606  | 0.0389  | 0.3382  | -0.1638 | -0.7932 | 0.5778  |
| PY00106 | 0.1523  | 0.2141  | 0.2391  | -0.1864 | 0.1129  | 0.0119  | 0.1381  | 0.1172  | 0.4325  | 0.0325  | 0.2441  | 0.1279  |
| PY07658 | -0.3613 | 0.0822  | -0.6124 | -0.5792 | -0.8192 | -0.0074 | -0.0715 | 0.3885  | 0.3177  | 0.073   | 0.3562  | 0.0702  |
| PY00294 | -0.1598 | -0.2154 | -0.4743 | -0.1924 | 0.4486  | 0.6982  | 0.0379  | 0.1648  | -0.1665 | -0.8858 | -0.4843 | -0.7208 |
| PY01211 | -0.768  | -0.6318 | -0.3866 | -0.474  | -0.2775 | -0.1215 | 0.0038  | 0.2681  | -0.2639 | -0.274  | 0.1239  | -0.3754 |
| PY01681 | 0.2081  | -0.0215 | 0.2963  | -0.209  | -0.0833 | 0.0111  | 0.0991  | -0.2064 | 0.0578  | -0.1826 | -0.2845 | 0.0845  |
| PY02293 | -0.1119 | 0.0091  | -0.3553 | -0.0675 | -0.2808 | -0.2001 | -0.049  | 0.3695  | 0.4477  | -1.3442 | 0.4047  | 0.518   |
| PY03777 | -0.3496 | -0.0719 | -0.0044 | -0.0985 | -0.3166 | -0.5841 | -0.079  | 0.1042  | 0.6512  | 0.3831  | 0.749   | -0.0906 |
| PY01187 | -0.5093 | -0.2408 | -0.123  | -0.4896 | 0.0401  | -0.1916 | -0.1815 | 0.0156  | -0.7297 | 0.0552  | 0.0104  | -0.63   |
| PY00459 | -0.3347 | 0.3716  | 0.678   | 0.7249  | -0.2305 | 0.084   | 0.1075  | 0.0502  | 0.0806  | 0.171   | -0.1379 | 0.0906  |
| PY05839 | -0.54   | -0.2356 | -0.1729 | 0.0372  | -0.0343 | -0.0186 | -0.1416 | 0.0727  | 0.2212  | 0.1202  | 0.3344  | -0.0365 |
| PY03572 | 0.4988  | 0.4533  | 0.8242  | -0.0471 | -0.6058 | 0.1217  | 0.1804  | -0.1779 | 0.3935  | -0.3234 | -0.4658 | 0.2235  |
| PY01018 | -0.1902 | 0.2702  | 0.3635  | -0.2108 | -1.0248 | 0.3611  | 0.5063  | 0.4071  | 0.1254  | -0.493  | -0.9124 | -0.5235 |
| PY07009 | -0.033  | -0.2445 | -0.5849 | -0.4254 | 0.0267  | -0.1911 | 0.058   | -0.0593 | 0.11    | 0.0514  | 0.5352  | 0.3672  |
| PY06315 | -0.7385 | -0.5933 | -0.4853 | -0.062  | -0.3106 | -0.3979 | 0.0565  | 0.3614  | 0.1283  | 0.1952  | 0.5235  | 0.2691  |
| PY06055 | 0.8096  | 0.4919  | 0.2663  | 0.3525  | -0.1634 | -0.4894 | 0.1307  | -0.1231 | 0.1993  | -0.1659 | -0.189  | 0.1975  |
| PY01627 | -1.3457 | -0.2702 | -0.1348 | -0.3582 | -0.4732 | -0.0227 | -0.1089 | 0.3646  | 0.2995  | 0.0084  | 0.564   | -0.4224 |
| PY01757 | -0.5181 | -0.1969 | 0.169   | 0.6222  | 0.8035  | 0.5914  | -0.0023 | 0.3695  | 0.2023  | 0.7411  | 0.8289  | 0.1221  |
| PY03955 | -0.1165 | -0.2383 | -0.013  | 0.4516  | -0.0806 | -0.3584 | -0.1651 | 0.3212  | 0.3903  | 0.3398  | 0.8199  | 0.1618  |
| PY02223 | 0.8515  | 0.291   | 0.3421  | 0.4118  | 0.0882  | 0.2158  | 0.0752  | -0.2876 | -0.3022 | -0.2216 | -0.981  | -0.2947 |
| PY05330 | 0.0573  | -0.0038 | -0.0095 | -0.5868 | 0.0179  | 0.1908  | 0.0436  | 0.3091  | -0.043  | 0.1081  | 0.2436  | 0.2695  |
| PY00019 | -0.0877 | -0.4262 | -0.4251 | 0.0102  | -0.4251 | -0.0919 | -0.2809 | 0.0574  | -0.1028 | 0.1461  | -0.2681 | 0.1666  |
| PY01952 | -0.7258 | -0.4795 | -0.329  | -0.0986 | -0.0467 | -0.3181 | -0.1222 | 0.1804  | -0.0504 | 0.2327  | 0.9342  | -0.0722 |
| PY05068 | -0.6382 | -0.4299 | -0.245  | 0.4807  | 0.1869  | -0.2422 | -0.2244 | 0.4992  | -0.0122 | 0.5477  | 0.2945  | -0.1353 |
| PY06561 | -0.8273 | -0.2597 | -0.6407 | -0.0626 | 0.8649  | 0.2741  | -0.0535 | -0.0418 | -0.1009 | 0.1883  | 0.2419  | -0.1433 |
| PY07115 | 0.3328  | 0.1027  | 0.0583  | -0.2817 | 0.1337  | 0.1027  | 0.0145  | 0.039   | 0.1453  | 0.0977  | -0.0226 | 0.4079  |
| PY01642 | -0.1497 | -0.1265 | 0.0575  | 0.1924  | -0.2187 | -0.1801 | -0.1863 | -0.0414 | 0.0988  | 0.2707  | 0.1811  | 0.1359  |
| PY05806 | 0.0554  | 0.1611  | 0.4575  | 0.5951  | -0.421  | 0.0197  | -0.4823 | 0.1488  | 1.1095  | 0.1059  | 0.0285  | 0.9738  |
| PY01291 | 0.2287  | 0.0094  | 0.0241  | 0.2702  | 0.5586  | -0.1513 | -0.152  | -0.0696 | -0.2692 | -0.1545 | 0.2453  | -0.042  |
| PY04102 | -0.6101 | -0.3046 | 0.0827  | -0.5726 | -0.1221 | -0.1964 | -0.2562 | -0.1378 | 0.0745  | 0.1645  | 0.4955  | -0.2799 |
| PY07104 | -0.1094 | -0.8559 | -0.537  | -0.1603 | 0.1142  | -0.4449 | -0.0531 | 0.2587  | 0.1534  | 0.4045  | -0.1108 | -0.1748 |
| PY00219 | 0.3704  | 0.0367  | -0.0904 | -0.2675 | -0.3599 | -0.3643 | -0.0041 | 0.1571  | -0.7523 | -0.2684 | -0.2745 | -0.02   |
| PY00673 | 0.1457  | 0.0627  | -0.1719 | -0.0166 | 0.4863  | 0.0351  | -0.1197 | -0.0999 | -0.4603 | 0.1433  | 0.3582  | -0.2218 |
| PY06762 | 0.4143  | 0.1299  | 0.1576  | 0.2778  | 0.2305  | -0.0069 | -0.1755 | -0.3615 | -0.1724 | -0.2308 | -0.2941 | -0.1008 |
| PY06559 | 0.416   | 0.4763  | 0.2488  | 0.1837  | 0.1651  | 0.02    | 0.1485  | -0.0141 | -0.0984 | -0.1735 | -0.4452 | -0.1737 |
| PY03720 | 0.038   | -0.1266 | 0.1105  | -0.3248 | -0.4107 | 0.1581  | -0.0562 | 0.1225  | 0.148   | -0.0206 | -0.0283 | 0.2513  |
| PY01489 | -0.4485 | 0.1081  | 0.1609  | -0.201  | -0.1141 | 0.2145  | -0.4428 | -0.1855 | -0.3464 | -0.5053 | -0.1616 | -0.6164 |
| PY01476 | 0.6188  | 0.2832  | 0.4324  | -0.3461 | -0.1909 | 0.1587  | 0.2675  | -0.3868 | 0.2708  | 0.1804  | -0.6955 | 0.3737  |
| PY05033 | -0.4417 | -0.37   | -0.3092 | -0.0045 | -0.2369 | -0.0675 | 0.1258  | 0.4589  | -0.1126 | 0.0369  | -0.1538 | -0.4965 |
| PY04768 | 0.6187  | 0.2045  | 0.0973  | 0.0637  | 0.2971  | -0.0132 | 0.0835  | -0.042  | 0.0698  | 0.1531  | -0.2377 | 0.2921  |
| PY01853 | -0.5701 | -0.189  | -0.1578 | -0.9821 | -0.2167 | 0.1048  | 0.026   | -0.0304 | 0.1523  | -0.2079 | -0.2179 | 0.1201  |
| PY07038 | -0.4788 | -0.3373 | 0.0613  | -0.3491 | -0.3603 | -0.0562 | 0.2081  | 0.3526  | 0.2933  | 0.3031  | 0.717   | -0.0016 |
| PY03205 | -0.1877 | -0.1059 | -0.0797 | 0.0576  | 0.222   | -0.0677 | -0.1942 | -0.1854 | -0.1817 | -0.015  | 0.0759  | -0.0194 |
| PY01046 | -0.0855 | -0.2852 | -0.1424 | -0.1418 | -0.2177 | -0.0869 | -0.0923 | -0.0272 | 0.0313  | -0.0865 | 0.1372  | -0.0534 |
| PY07011 | -0.6337 | 0.1101  | 0.0065  | -0.5451 | -0.5648 | -0.3562 | -0.0739 | 0.22    | 0.3615  | -0.0608 | 0.7259  | -0.1426 |
| PY01706 | -0.2838 | -0.2284 | -0.3093 | -0.2439 | 0.1726  | -0.1213 | -0.1029 | 0.1539  | 0.0062  | 0.1437  | 0.1629  | -0.1002 |
| PY03457 | -0.2864 | -0.1823 | 0.0441  | -0.2218 | -0.1585 | 0.193   | 0.629   | -0.2153 | 0.2542  | -0.6193 | -0.199  | 0.5331  |
| PY07501 | 0.0795  | 0.1622  | 0.0542  | -1.0265 | 0.0285  | -0.0167 | -0.1292 | 0.0801  | 0.1458  | -0.7077 | -0.0019 | 0.1036  |
| PY02198 | -0.3643 | -0.0505 | -0.2882 | 0.1014  | 0.253   | 0.0949  | -0.0445 | 0.0974  | 0.0795  | 0.4751  | 0.5357  | 0.1275  |
| PY03171 | 0.4651  | 0.4041  | 0.4519  | 0.1347  | 0.0378  | 0.3404  | 0.475   | -0.1932 | 0.0445  | -0.0365 | -0.1355 | 0.3252  |
| PY07341 | -0.115  | 0.0167  | -0.1294 | -0.068  | -0.3419 | 0.1645  | 0.1996  | 0.1146  | 0.0104  | -0.5519 | -0.2304 | 0.0059  |
| PY02441 | 0.442   | 0.1637  | 0.3272  | 0.1492  | -0.0996 | -0.009  | 0.1224  | -0.3774 | 0.072   | -0.0308 | -0.2636 | 0.1927  |
| PY07173 | 0.8528  | 0.2667  | 0.6354  | 0.316   | 0.2854  | 0.0048  | 0.228   | -0.6398 | 0.0484  | 0.1074  | 0.1167  | 0.0937  |
| PY06901 | 0.1316  | -0.0676 | 0.1525  | 0.4332  | 0.096   | 0.11    | -0.0869 | 0.1179  | 0.147   | -0.4427 | 0.1447  | 0.3596  |
| PY04175 | 0.464   | 0.4816  | -0.1202 | -0.7555 | -0.711  | -0.3942 | 0.0575  | -0.2701 | 0.2708  | -0.5136 | 0.0951  | 0.05    |

|         |         |         |         |         |         |         |         |         |         |         |         |         |
|---------|---------|---------|---------|---------|---------|---------|---------|---------|---------|---------|---------|---------|
| PY02721 | 1.3306  | 0.3403  | 0.2537  | 0.9151  | 0.273   | 0.2119  | 0.1632  | -0.6633 | -0.3585 | -0.2389 | -0.8736 | 0.1903  |
| PY01752 | -1.3533 | -0.3783 | -0.2328 | -0.5772 | -0.2239 | -0.0809 | 0.1043  | 0.6301  | 0.2681  | 0.1562  | 0.7897  | -0.4288 |
| PY05677 | -1.6046 | -1.1208 | -1.3261 | -0.8904 | -0.7709 | -0.3668 | -0.2567 | -0.0198 | 0.107   | 0.5616  | 0.9913  | 0.589   |
| PY00030 | -0.3788 | -0.1951 | 0.3486  | 0.1386  | -0.616  | -0.1034 | 0.0347  | 0.1086  | -0.8699 | -0.4398 | 0.0345  | -0.7079 |
| PY05328 | -0.4996 | -0.4303 | 0.0659  | -0.1868 | -0.2023 | -0.3561 | -0.3159 | -0.122  | -0.254  | -0.1056 | 0.1892  | -0.4246 |
| PY02156 | -0.775  | -0.4971 | -0.2142 | 0.2733  | -0.3351 | -0.4334 | -0.5241 | 0.0477  | -0.1394 | 0.547   | 0.5657  | 0.4408  |
| PY00363 | 0.0145  | 0.0604  | 0.1528  | 0.448   | 0.2154  | 0.4147  | 0.3153  | -0.0553 | 0.0391  | -0.1002 | -0.2127 | 0.2172  |
| PY02310 | 0.6272  | 0.2726  | -0.0192 | -0.0573 | -0.0989 | 0.2184  | 0.081   | -0.1009 | -0.0445 | -0.1248 | -0.4538 | -0.1625 |
| PY00831 | 0.0746  | 0.2522  | -0.2016 | -0.5511 | -0.2144 | -0.223  | 0.2138  | 0.3986  | 0.2262  | 0.2378  | 0.4867  | -0.0532 |
| PY00050 | 0.6597  | 0.4377  | 0.4386  | 0.2686  | -0.0941 | 0.1134  | 0.3534  | -0.0323 | 0.0837  | -0.1783 | -0.6343 | 0.4069  |
| PY05251 | 0.6549  | 0.2178  | -0.3971 | 0.3962  | -0.2246 | -0.2943 | -0.3969 | 0.0377  | -0.021  | 0.1898  | -0.3734 | -0.7277 |
| PY05473 | -0.7311 | -0.3886 | -0.3209 | -0.5476 | 0.0343  | -0.1094 | -0.0939 | -0.0173 | 0.0631  | 0.1564  | 0.175   | 0.1381  |
| PY06590 | -0.28   | -0.5895 | -0.2452 | 0.7325  | 0.3455  | -0.1667 | -0.1052 | -0.119  | -1.4992 | -0.1479 | 0.5147  | -0.9477 |
| PY00811 | -0.3287 | 0.0848  | -0.1769 | 0.4654  | 0.1808  | 0.3824  | 0.1768  | 0.4822  | 0.0881  | -0.6366 | 0.1415  | 0.042   |
| PY00418 | -0.3941 | -0.3241 | -0.5271 | 0.0085  | -0.0536 | 0.2467  | 0.1184  | 0.241   | -0.1056 | -0.0045 | 0.0009  | -0.0398 |
| PY03238 | -0.3496 | -0.1592 | -0.2848 | -0.5385 | 0.511   | 0.1646  | 0.0571  | -0.0033 | -0.1066 | -0.0548 | 0.1323  | 0.0323  |
| PY03408 | 0.7064  | 0.4216  | 0.327   | 0.1493  | 0.1421  | 0.411   | 0.3184  | -0.2214 | -0.0647 | -0.1708 | -0.6693 | 0.1452  |
| PY05219 | 0.1708  | 0.2079  | -0.2763 | -0.1699 | 0.1557  | -0.1132 | 0.5047  | 0.0948  | -0.0316 | 0.2503  | -0.1234 | 0.8531  |
| PY06736 | -0.2973 | -0.1603 | -0.1634 | -0.7037 | 0.0525  | 0.0206  | 0.084   | 0.0196  | -0.1465 | -0.0863 | -0.1773 | 0.1028  |
| PY06196 | -0.2572 | -0.2411 | -0.6417 | -0.609  | -0.6408 | -0.1337 | -0.1422 | -0.3095 | 0.0519  | -0.6066 | -0.1436 | 0.1085  |
| PY01374 | -0.4231 | -0.4729 | -1.0393 | -0.04   | 0.5178  | 0.1253  | -0.0524 | 0.202   | -0.0975 | 0.4454  | 0.2811  | 0.1667  |
| PY01721 | -0.3011 | -0.0392 | -0.2387 | 0.0662  | -0.2087 | -0.2695 | 0.061   | 0.6106  | 0.7342  | 0.8494  | 0.416   | 0.5715  |
| PY05078 | 0.6562  | 0.342   | 0.3837  | -0.1225 | -0.4426 | 0.318   | 0.1092  | -0.2994 | -0.0854 | -0.3901 | -0.742  | 0.0432  |
| PY04536 | -0.3091 | 0.0073  | -0.2809 | -0.2355 | -0.0381 | -0.2398 | 0.1248  | 0.1116  | 0.1035  | -0.2738 | 0.0296  | 0.119   |
| PY06086 | -0.5709 | -0.195  | 0.0574  | 0.0318  | -0.4303 | 0.0505  | 0.0945  | -0.0009 | 0.2016  | 0.1696  | 0.2012  | 0.092   |
| PY05234 | -0.2769 | -0.2685 | -0.3073 | -0.8987 | -0.1197 | -0.199  | -0.0922 | 0.0024  | 0.0149  | -0.1451 | 0.3284  | 0.1672  |
| PY00122 | 0.4958  | 0.0992  | 0.1056  | 0.5607  | 0.2353  | -0.2122 | -0.2242 | -0.345  | -0.265  | -0.1475 | -0.0577 | -0.2269 |
| PY06304 | 0.2026  | -0.016  | 0.0409  | 0.1513  | -0.2346 | -0.1166 | -0.025  | -0.1926 | 0.0739  | -0.5009 | 0.0622  | 0.1607  |
| PY05385 | -0.2548 | 0.0074  | 0.1146  | -0.0842 | 0.0488  | 0.3601  | 0.1395  | -0.017  | 0.0973  | 0.1084  | -0.1186 | 0.093   |
| PY05933 | 0.5383  | -0.0739 | -0.0304 | -0.1577 | -0.4137 | -0.1018 | 0.2052  | -0.1742 | -0.2446 | 0.1813  | -0.3931 | 0.5791  |
| PY00805 | 0.5194  | -0.3546 | 0.2973  | 0.0541  | -0.0647 | -0.2959 | -0.4625 | -0.2458 | -0.1791 | -0.1018 | -0.2543 | 0.0188  |
| PY02463 | 0.305   | -0.1994 | 0.0619  | 0.2772  | 0.3551  | 0.1889  | 0.0827  | -0.1827 | -0.197  | -0.1125 | -0.085  | 0.1326  |
| PY01346 | -0.6658 | -0.3458 | 0.0398  | 0.6406  | -0.0366 | -0.3302 | -0.2092 | 0.2676  | 0.1669  | 0.5821  | 0.7559  | 0.0633  |
| PY02417 | -1.1935 | -0.0723 | -0.0985 | -0.8483 | -0.5381 | -0.8197 | -0.2514 | -0.3128 | -0.1986 | -0.3358 | 0.4698  | -0.2146 |
| PY00166 | -0.5227 | -0.5728 | -0.0422 | 0.8925  | 0.1543  | -0.0209 | -0.581  | 0.4814  | 0.1969  | 0.5824  | 0.6494  | -0.2568 |
| PY03535 | -0.0316 | -0.1962 | -0.1291 | 0.4033  | -0.1064 | -0.1501 | -0.3729 | 0.1768  | -0.2044 | 0.6712  | -0.0137 | 0.1802  |
| PY07031 | 0.502   | -0.0257 | -0.2186 | 0.6478  | 0.0996  | -0.1543 | -0.0518 | 0.0611  | -0.2993 | 0.2673  | -0.1235 | -0.0138 |
| PY06758 | -0.1748 | -0.0766 | -0.2984 | 0.0373  | -0.1264 | -0.2087 | 0.1525  | 0.1847  | 0.157   | 0.0127  | 0.299   | 0.5018  |
| PY02805 | -0.0154 | 0.1599  | 0.2488  | 0.2704  | -0.0453 | 0.1186  | 0.1491  | -0.1144 | -0.1402 | -0.1251 | -0.0708 | -0.1176 |
| PY02448 | -0.0905 | 0.102   | -0.2311 | 0.048   | -0.011  | 0.5029  | 0.069   | 0.0069  | 0.398   | -0.0004 | 0.0021  | -0.5268 |
| PY02383 | -0.2627 | -0.1431 | -0.1887 | 0.1238  | 0.0023  | -0.0195 | 0.2058  | 0.1443  | 0.0364  | 0.2348  | -0.1645 | -0.1116 |
| PY06209 | -0.3014 | 0.2086  | -0.032  | -0.52   | -0.3552 | 0.104   | 0.0312  | 0.0316  | 0.1354  | -0.544  | -0.1631 | 0.066   |
| PY04823 | -0.3974 | -0.2412 | -0.0859 | 0.0019  | 0.7431  | 0.2793  | -0.0749 | 0.1035  | -0.1449 | 0.0588  | 0.2694  | -0.1639 |
| PY02980 | -0.0285 | -0.2887 | -0.1008 | 0.1464  | 0.4818  | 0.0385  | 0.0869  | 0.0425  | 0.1263  | 0.4722  | 0.387   | 0.0467  |
| PY03174 | 0.2263  | 0.2566  | 0.2055  | -0.2448 | -0.3045 | 0.4439  | 0.1697  | -0.0476 | 0.0372  | -0.3845 | -0.505  | -0.1319 |
| PY05563 | 0.2055  | -0.1134 | 0.1385  | -0.1397 | -0.2256 | 0.0677  | -0.5121 | 0.1744  | 0.2295  | 0.6896  | 0.1148  | -0.0288 |
| PY02916 | -0.9445 | -0.3413 | -0.2464 | -0.0242 | 0.2071  | 0.074   | -0.1866 | -0.0238 | -0.417  | 0.1414  | -0.0965 | -0.5307 |
| PY03372 | 0.0423  | 0.0311  | 0.2346  | 0.6953  | 0.0439  | -0.3321 | -0.1006 | -0.0089 | 0.0083  | 0.1239  | -0.0521 | -0.49   |
| PY05414 | 0.0827  | 0.2724  | -0.0428 | 0.4691  | -0.3734 | -0.2966 | -0.0233 | 0.309   | 0.4904  | -0.2829 | -0.2877 | -0.062  |
| PY00337 | 0.0238  | -0.0126 | -0.0621 | -0.2713 | 0.5363  | -0.0656 | -0.1716 | -0.2088 | -0.0616 | -0.0226 | -0.0442 | 0.0047  |
| PY00546 | -0.0875 | -0.0283 | 0.1476  | -0.0581 | -0.091  | 0.0473  | 0.1468  | -0.1482 | -0.2172 | -0.1663 | -0.5261 | 0.0773  |
| PY01740 | -0.271  | -0.0484 | -0.6005 | -0.0081 | 0.88    | 0.4699  | 0.0929  | -0.1424 | -0.3626 | -0.9133 | -0.2606 | -0.486  |
| PY07423 | -0.7617 | -0.253  | -0.1131 | -0.03   | -0.0772 | -0.6479 | -0.4398 | -0.0434 | -0.0315 | 0.119   | -0.0368 | -0.0649 |
| PY05870 | 0.8716  | 0.3613  | 0.2475  | 0.1317  | -0.0113 | 0.3787  | 0.105   | -0.2874 | -0.2313 | -0.1993 | -0.8144 | 0.081   |
| PY03434 | -0.2916 | -0.0805 | 0.2561  | 0.1612  | -0.0005 | 0.231   | -0.2984 | -0.24   | -0.5757 | -0.2213 | -0.0306 | -0.2896 |
| PY01841 | 0.0377  | 0.0203  | 0.4541  | -0.3362 | 0.0296  | 0.0937  | -0.0452 | -0.2855 | -0.3521 | -0.552  | -0.1106 | -0.2739 |
| PY01999 | 0.3748  | 0.1102  | 0.4355  | -0.0326 | 0.1489  | 0.2099  | 0.1538  | -0.1519 | 0.1206  | -0.2087 | -0.3749 | 0.1261  |
| PY01615 | 0.1634  | 0.2252  | -0.3193 | 0.0212  | -0.1244 | -0.1356 | 0.1283  | 0.0655  | 0.168   | 0.0969  | -0.0667 | 0.1844  |
| PY06836 | -0.1171 | -0.1051 | -0.2217 | -0.1652 | 0.5277  | 0.3729  | 0.3201  | 0.3624  | 0.0334  | -0.1131 | 0.1184  | 0.051   |
| PY00322 | -1.2279 | -0.4326 | 0.1324  | -0.7673 | -0.1805 | -0.2356 | -0.2202 | 0.1845  | 0.0836  | 0.1081  | 0.6777  | -0.2707 |
| PY03037 | -0.5135 | -0.4688 | -0.4771 | -0.0476 | 0.6178  | 0.0735  | 0.4038  | -0.1656 | -0.0124 | 0.229   | 0.316   | 0.478   |
| PY07495 | 0.1933  | 0.0755  | -0.2914 | -0.545  | -0.3252 | -0.3169 | -0.8408 | -0.1602 | 0.1     | -0.2223 | -0.4    | -0.0428 |
| PY02533 | -0.0333 | -0.1178 | -0.2868 | -0.857  | -0.3857 | -0.3539 | -0.1098 | -0.074  | 0.1433  | -0.1712 | -0.0385 | -0.0856 |

|         |         |         |         |         |         |         |         |         |         |         |         |         |
|---------|---------|---------|---------|---------|---------|---------|---------|---------|---------|---------|---------|---------|
| PY03522 | -0.7135 | -0.3031 | -0.2812 | -0.2152 | -0.4869 | -0.321  | -0.2116 | -0.173  | -0.0765 | -0.0974 | 0.2277  | -0.1786 |
| PY05596 | 0.246   | -0.1325 | -0.1468 | 0.0421  | 0.2004  | -0.2609 | -0.3131 | -0.3304 | -0.1291 | -0.1666 | 0.1532  | 0.0684  |
| PY03724 | -0.1404 | 0.0664  | 0.1399  | 0.6117  | 0.1573  | -0.0091 | -0.0329 | 0.3245  | 0.1813  | 0.1441  | 0.1108  | 0.1189  |
| PY03216 | -0.0828 | -0.5277 | -0.5773 | -0.6747 | -0.1745 | -0.2443 | -0.5097 | 0.2968  | -0.0664 | 0.0691  | -0.1354 | -0.2776 |
| PY06523 | 0.4361  | 0.0562  | -0.051  | 0.0969  | -0.1158 | -0.1051 | 0.0767  | 0.2723  | -0.0387 | -0.1559 | -0.3178 | -0.0763 |
| PY02305 | -0.7071 | -0.3599 | -0.2923 | -0.6565 | 0.1703  | -0.0202 | -0.04   | -0.0962 | -0.1883 | 0.1405  | 0.2317  | -0.0018 |
| PY04087 | 0.4229  | 0.2258  | -0.042  | -0.6881 | -0.4674 | 0.2011  | 0.1777  | 0.5206  | 0.1275  | 0.3834  | -0.1983 | 0.2826  |
| PY07626 | 0.1635  | 0.1207  | 0.153   | -1.1932 | -0.228  | -0.149  | -0.1162 | -0.4136 | 0.0048  | -0.3075 | -0.2941 | -0.0747 |
| PY03285 | 0.0591  | 0.0808  | -0.4414 | 1.0816  | -0.0752 | -0.0384 | -0.1053 | -0.1139 | 0.0308  | 0.3425  | 0.1731  | -0.0784 |
| PY01307 | -0.3974 | 0.0119  | 0.2195  | 0.5173  | 0.2814  | 0.4862  | 0.1444  | 0.3287  | -0.0591 | 0.6708  | 0.7312  | 0.152   |
| PY03767 | 0.3217  | 0.0765  | 0.277   | 0.427   | 0.5413  | 0.4329  | 0.0911  | -0.0115 | -0.0752 | 0.4565  | 0.1125  | 0.115   |
| PY00040 | -0.3785 | -0.4834 | -0.6101 | 0.2782  | 0.0461  | 0.5032  | -0.0726 | 0.0735  | -0.2573 | 0.4661  | -0.0273 | -0.3244 |
| PY05748 | -0.2291 | 0.2608  | 0.0398  | -0.5751 | -0.7685 | 0.1968  | 0.549   | 0.1634  | 0.3828  | -0.4353 | -0.6442 | -0.2775 |
| PY03448 | -1.4566 | -0.4062 | -0.2994 | -0.7442 | -0.6862 | -0.3993 | -0.2031 | 0.4338  | 0.3214  | 0.2257  | 0.5865  | -0.4155 |
| PY00446 | -1.1518 | -0.4096 | 0.0421  | 0.6088  | -0.1409 | -0.2132 | -0.1986 | 0.0577  | -0.1377 | 0.4772  | 0.715   | -0.204  |
| PY02952 | -0.2978 | 0.0743  | 0.1333  | 0.3306  | -0.2234 | -0.3265 | -0.3689 | 0.077   | 0.0665  | 0.1897  | 0.4444  | 0.0073  |
| PY00959 | 0.6095  | 0.2305  | 0.5703  | -0.074  | -0.2674 | 0.0526  | 0.2633  | -0.1351 | 0.2415  | 0.3241  | -0.2606 | 0.3887  |
| PY02657 | -0.3412 | -0.0615 | -0.1529 | 0.7039  | -0.0836 | -0.169  | -0.0687 | 0.4398  | 0.0179  | 0.1732  | 0.2509  | -0.3067 |
| PY06065 | 0.2854  | 0.4441  | 1.0082  | 0.874   | 0.2304  | 0.2715  | 0.4633  | 0.5442  | 0.059   | 0.1722  | -0.202  | 0.2394  |
| PY03141 | 0.9865  | 0.9986  | 1.4105  | 0.3997  | -0.5177 | 0.0426  | 0.6238  | -0.2371 | 0.7988  | -0.5369 | -1.0474 | 0.5252  |
| PY05633 | 0.7248  | 0.4331  | 0.1337  | -0.1695 | -0.1948 | 0.1366  | 0.1397  | -0.2316 | -0.0893 | -0.1238 | -0.9423 | 0.0608  |
| PY05760 | -0.2443 | 0.4427  | -0.1771 | -0.7098 | -0.4312 | -0.4293 | -0.112  | 0.1661  | 0.4765  | 0.144   | 0.8975  | 0.1442  |
| PY02573 | -0.1259 | -0.2268 | -0.0076 | -0.095  | -0.0347 | 0.1146  | 0.3002  | 0.1055  | 0.2745  | -0.0784 | 0.0844  | -0.0536 |
| PY02553 | 0.3971  | 0.379   | 0.3983  | 0.0488  | -0.159  | 0.2167  | -0.0066 | -0.2537 | -0.0996 | 0.2951  | -0.0105 | -0.366  |
| PY03225 | 0.696   | 0.0899  | 0.1251  | -0.9699 | -0.2316 | -0.1092 | 0.2482  | -0.2939 | -0.1475 | -0.7119 | -0.78   | 0.0441  |
| PY02627 | 0.9033  | 0.3728  | 0.3295  | 0.5202  | -0.2501 | -0.1452 | 0.0116  | -0.2838 | -0.2161 | -0.2629 | -0.4771 | -0.0356 |
| PY03157 | -0.4999 | -0.4043 | -0.7574 | 0.7888  | 0.2016  | -0.3858 | -0.1503 | -0.223  | -0.219  | 0.3307  | 0.1582  | -0.4363 |
| PY03638 | -0.498  | -0.1419 | 0.0502  | 0.3316  | -0.0177 | -0.3181 | -0.3372 | 0.0582  | -0.658  | 0.3709  | 0.3209  | -0.2532 |
| PY05199 | 0.0613  | 0.0526  | 0.0964  | -0.0613 | -0.0699 | 0.4435  | 0.3937  | -0.1448 | -0.001  | -0.3261 | 0.111   | 0.1717  |
| PY00819 | -0.1498 | 0.1193  | -0.2055 | 0.2112  | -0.0518 | -0.3669 | -0.456  | -0.0897 | -0.4771 | -0.1913 | 0.1216  | -0.2635 |
| PY03838 | -0.4498 | 0.1193  | 0.0485  | 0.5737  | 0.3271  | 0.0147  | 0.1057  | 0.4373  | 0.3778  | 0.3579  | 0.4022  | 0.0872  |
| PY07023 | 0.094   | -0.0802 | 0.545   | 0.5902  | 0.0615  | 0.0441  | 0.0999  | -0.2732 | 0.1096  | -0.3872 | -0.2916 | -0.1863 |
| PY02934 | -0.6541 | -0.0897 | 0.2258  | 0.0479  | -0.2971 | -0.5677 | -0.6253 | -0.254  | -0.1468 | -0.1482 | 0.0496  | -0.3771 |
| PY04150 | -0.2723 | 0.2601  | 0.2507  | -0.0277 | -0.1712 | -0.3108 | -0.0713 | -0.23   | -0.0239 | -0.1728 | -0.1314 | -0.3178 |
| PY03161 | 0.4007  | 0.2429  | 0.1653  | 0.0283  | -0.1438 | -0.0487 | 0.387   | 0.0777  | 0.2296  | 0.0077  | 0.2577  | 0.2944  |
| PY02016 | -0.4942 | -0.3056 | -0.0213 | 0.0849  | -0.1918 | 0.1072  | -0.0254 | 0.3734  | -0.0058 | 0.619   | 0.2052  | -0.2979 |
| PY02267 | -0.0702 | 0.1605  | 0.3889  | -0.9329 | 0.0355  | 0.2549  | 0.369   | -0.5268 | -0.0854 | -0.2566 | 0.0229  | 0.3781  |
| PY07255 | -1.1634 | -0.3974 | -0.0202 | -0.0081 | -0.1458 | -0.0727 | 0.0736  | 0.3832  | 0.0811  | 0.53    | 0.5943  | 0.1639  |
| PY03414 | -0.534  | -0.3775 | 0.0545  | -0.0836 | 0.3523  | 0.393   | -0.1471 | 0.155   | -0.1276 | -0.238  | 0.0856  | -0.3642 |
| PY00755 | 0.0174  | 0.0999  | -0.0766 | 0.2734  | -0.1876 | -0.0082 | -0.2465 | 0.1354  | -0.4788 | 0.1792  | -0.4079 | -0.0789 |
| PY00112 | -1.5487 | -0.0208 | 0.2995  | -0.6214 | 0.1198  | 0.2187  | 0.0089  | -0.0206 | -0.1806 | -0.7062 | 0.2164  | -0.6886 |
| PY04004 | 0.0119  | -0.1281 | -0.278  | 0.0863  | 0.5632  | 0.1007  | -0.0171 | 0.3067  | -0.1945 | 0.3841  | 0.5031  | 0.0819  |
| PY03707 | 0.3529  | -0.0708 | 0.4052  | 0.1771  | 0.0091  | 0.4443  | 0.1353  | 0.0099  | -0.2663 | 0.2726  | -0.2566 | -0.0319 |
| PY03006 | -0.2762 | -0.1858 | 0.2717  | 0.3694  | 0.374   | 0.3155  | 0.2578  | 0.2048  | -0.2483 | 0.2812  | 0.1858  | 0.6594  |
| PY00653 | 0.0434  | -0.1239 | -0.1751 | 0.142   | 0.3053  | 0.127   | -0.0309 | -0.0112 | -0.1359 | 0.2225  | 0.0442  | -0.0754 |
| PY02584 | -0.1864 | 0.0099  | 0.0874  | -0.1521 | -0.6541 | 0.0012  | 0.0019  | 0.1166  | 0.275   | -0.0137 | -0.2817 | 0.0091  |
| PY03381 | -0.3229 | 0.1252  | 0.6293  | 0.1595  | -0.1965 | -0.2298 | 0.0997  | -0.0649 | 0.1629  | -0.0191 | 0.0201  | -0.4477 |
| PY00110 | -0.2705 | -0.2491 | 0.0864  | -0.67   | 0.0229  | 0.2764  | 0.4571  | 0.3031  | 0.3213  | -0.2001 | -0.149  | 0.2183  |
| PY03911 | -0.6405 | -0.1467 | 0.1089  | -1.0041 | -0.3299 | -0.0765 | 0.0803  | 0.0171  | 0.2185  | -0.1837 | 1.1812  | 0.5184  |
| PY03791 | 0.7869  | 0.3575  | 0.2468  | -0.2481 | -0.1514 | -0.1939 | 0.2458  | -0.2817 | 0.1272  | -0.3242 | -0.3195 | 0.3438  |
| PY04661 | -0.3944 | -0.1293 | -0.278  | -0.219  | 0.2314  | -0.2396 | -0.1446 | 0.0839  | 0.0487  | -0.0309 | 0.222   | -0.097  |
| PY03099 | -0.0035 | -0.0725 | 0.0757  | -0.3133 | 0.3097  | -0.0387 | -0.2985 | -0.2344 | -0.3324 | -0.0756 | -0.055  | -0.1936 |
| PY03336 | 0.022   | -0.1097 | -0.1332 | 0.1917  | -0.2244 | 0.0585  | -0.2223 | 0       | -0.3756 | 0.2319  | 0       | -0.1957 |
| PY03151 | -0.1941 | -0.2177 | -0.2074 | -0.1566 | 0.3134  | -0.2258 | -0.324  | 0.0012  | -0.0675 | 0.163   | 0.5098  | 0.0371  |
| PY03844 | 0.351   | 0.4965  | 0.7682  | 0.1457  | -0.1357 | -0.1018 | 0.4212  | 0.1577  | 0.2714  | -0.2017 | -0.2886 | 0.1508  |
| PY03671 | -0.1891 | -0.301  | -0.3926 | -0.0191 | -0.2821 | 0.2889  | 0.1156  | -0.1804 | -0.0615 | -0.7562 | -0.1175 | -0.0641 |
| PY00692 | 0.4723  | -0.0652 | -0.2985 | 0.1043  | 0.0846  | -0.1913 | -0.122  | 0.008   | -0.0684 | -0.1548 | -0.1626 | 0.1191  |
| PY02020 | -0.9083 | -0.2431 | 0.103   | -0.3461 | -0.1475 | -0.2659 | -0.2394 | -0.1166 | -0.0428 | -0.3891 | 0.1421  | -0.4982 |
| PY05752 | -0.0784 | -0.0125 | 0.091   | -0.6565 | -0.3063 | -0.1491 | 0.1071  | 0.0619  | -0.0295 | -0.4053 | -0.123  | -0.0185 |
| PY02710 | -0.1892 | -0.3583 | -0.0276 | -0.32   | 0.1946  | 0.1635  | 0.2457  | 0.2369  | 0.2868  | 0.4095  | 0.1374  | 0.1885  |
| PY01493 | -1.003  | -0.3951 | -0.3003 | -0.4899 | -0.1225 | 0.3198  | -0.1037 | -0.257  | -0.3409 | -0.1608 | -0.0056 | -0.1699 |
| PY05346 | -0.3698 | -0.0279 | -0.0455 | -0.0616 | -0.0544 | 0.0474  | 0.1132  | -0.0695 | 0.122   | -0.2557 | 0.0839  | 0.1554  |
| PY06210 | -0.2783 | -0.2308 | -0.1465 | 0.0282  | 0.1375  | 0.1429  | -0.1408 | 0.2395  | -0.2209 | 0.3357  | 0.0771  | -0.1304 |



|         |         |         |         |         |         |         |         |         |         |         |         |         |
|---------|---------|---------|---------|---------|---------|---------|---------|---------|---------|---------|---------|---------|
| PY06465 | 0.4523  | 0.1244  | 0.2396  | 0.3329  | 0.3097  | -0.0115 | -0.0508 | -0.1422 | -0.1406 | 0.5329  | -0.0618 | -0.1188 |
| PY06343 | -0.2562 | 0.0178  | -0.1267 | 0.5387  | 0.0155  | -0.062  | -0.0345 | -0.0467 | -0.2875 | -0.6009 | -0.0251 | -0.1478 |
| PY06965 | 0.1195  | -0.0568 | -0.6419 | -0.0409 | 0.3281  | 0.0861  | -0.2101 | -0.4746 | -0.5252 | -0.4057 | -0.5983 | -0.0274 |
| PY03325 | -0.3969 | 0.122   | 0.3068  | -0.3791 | -0.2048 | 0.3921  | 0.7604  | 0.178   | 0.4358  | -0.3393 | -0.5332 | 0.0811  |
| PY02089 | -1.276  | -0.1974 | -0.0584 | -0.267  | -0.2998 | -0.1675 | 0.0626  | 0.1388  | 0.2902  | -0.0337 | 0.4351  | 0.2564  |
| PY07228 | -0.5325 | -0.1641 | -0.0067 | -0.025  | -0.0995 | -0.2335 | -0.1846 | -0.0529 | -0.2321 | 0.195   | 0.1127  | 0.1489  |
| PY01560 | 1.0615  | 0.5487  | 0.537   | -0.2571 | -0.5485 | -0.2237 | 0.0753  | -0.1894 | 0.279   | -0.5005 | -0.3916 | 0.3707  |
| PY04966 | 0.2943  | 0.0032  | -0.2662 | -0.0744 | 0.2275  | -0.1279 | 0.3124  | 0.0629  | 0.0971  | -0.1658 | -0.7188 | 0.1484  |
| PY00466 | -0.7076 | -0.098  | 0.1131  | -0.2915 | 0.1551  | 0.1823  | 0.0281  | -0.0599 | 0.0787  | 0.2214  | 0.1324  | 0.2312  |
| PY03373 | 0.5     | -0.08   | -0.0842 | 0.0318  | 0.3684  | -0.062  | -0.3171 | -0.2112 | -0.2773 | -0.3054 | -0.466  | -0.0838 |
| PY02653 | -0.1041 | 0.012   | -0.1819 | -0.1918 | 0.3023  | 0.1485  | -0.3932 | -0.0791 | 0.1944  | 0.124   | 0.2715  | 0.1462  |
| PY06701 | 0.4611  | 0.4103  | 0.2322  | 0.7577  | 0.4475  | 0.4382  | 0.3066  | 0.4399  | 0.1037  | 0.7321  | 0.179   | 0.2032  |
| PY01248 | -0.0975 | -0.0275 | 0.1092  | -0.1483 | -0.0283 | -0.3635 | -0.2851 | 0.2868  | -0.1787 | 0.4288  | 0.6945  | 0.0815  |
| PY02049 | -0.215  | -0.0313 | 0.246   | 0.131   | -0.2576 | 0.1715  | 0.3006  | 0.1794  | 0.2879  | -0.2505 | 0.0755  | -0.0723 |
| PY06161 | -1.326  | -0.5182 | -0.3482 | -0.2319 | -0.3806 | -0.4205 | -0.2741 | 0.3341  | 0.0121  | 0.6159  | 0.7213  | -0.148  |
| PY01110 | 0.419   | 0.0104  | 0.2578  | 0.8196  | 0.1865  | 0.0004  | -0.1425 | 0.4644  | 0.195   | 0.8129  | 0.2361  | 0.096   |
| PY03121 | -0.1471 | 0.3298  | 0.0141  | -0.1261 | -0.0841 | 0.0827  | -0.0258 | 0.2731  | 0.1319  | 0.3847  | 0.622   | -0.106  |
| PY05240 | 0.1568  | -0.0387 | -0.3519 | 0.0568  | -0.0525 | -0.0802 | 0.1442  | 0.0683  | 0.1473  | 0.4347  | 0.3319  | 0.4465  |
| PY05354 | 0.7323  | 0.3361  | 0.0544  | 0.255   | -0.0438 | 0.1471  | 0.359   | 0.1523  | 0.2482  | 0.2527  | -0.0159 | 0.2744  |
| PY06134 | 0.3732  | -0.0289 | -0.2789 | 0.6528  | 0.3547  | 0.0605  | -0.0192 | 0.2472  | -0.2568 | 0.4018  | -0.0889 | 0.3178  |
| PY06587 | -0.1514 | -0.119  | -0.2165 | -0.0684 | -0.3198 | -0.1248 | 0.0201  | 0.1546  | 0.1303  | -0.0559 | -0.0431 | 0.1179  |
| PY00558 | 0.419   | 0.1849  | 0.1384  | 0.7055  | 0.5455  | 0.2009  | 0.2532  | 0.204   | -0.053  | 0.0421  | 0.3769  | 0.1211  |
| PY01155 | -0.1088 | 0.1164  | -0.1666 | 0.4194  | 0.3007  | 0.1197  | 0.1231  | 0.0986  | 0.1583  | 0.578   | 0.3582  | 0.073   |
| PY00623 | -0.0769 | 0.0388  | 0.0085  | 0.413   | -0.1918 | -0.1935 | -0.0304 | 0.0248  | -0.1062 | 0.2882  | -0.385  | 0.1312  |
| PY04412 | -0.0019 | 0.2444  | 0.1263  | 0.6542  | -1.2683 | -0.1038 | -0.0492 | 0.1422  | 0.1195  | -0.0427 | -0.0486 | -0.0328 |
| PY05772 | -0.0087 | 0.0267  | -0.1519 | 0.0513  | -0.1181 | -0.0541 | 0.1302  | 0.101   | 0.2353  | 0.1261  | -0.1485 | 0.5615  |
| PY05690 | 0.6913  | 0.0748  | -0.2449 | 0.073   | 0.2059  | -0.2077 | -0.0106 | -0.0584 | 0.3474  | 0.258   | 0.256   | 0.1913  |
| PY07384 | -0.3349 | 0.0477  | 0.1677  | 0.4001  | -0.0552 | -0.3843 | -0.1297 | 0.0879  | -0.2061 | 0.2343  | -0.0676 | -0.1887 |
| PY03982 | -0.6123 | -0.4456 | -0.2894 | -0.3413 | -0.1086 | -0.128  | -0.0656 | 0.3152  | 0.558   | 0.2665  | 0.6611  | 0.1112  |
| PY01037 | 0.4843  | 0.3437  | 0.0738  | 0.0917  | -0.0406 | -0.1696 | -0.0857 | -0.1017 | -0.2134 | -0.2273 | -0.493  | -0.158  |
| PY01520 | 0.5157  | 0.2569  | -0.0042 | 0.0166  | -0.0346 | 0.2703  | 0.21    | -0.0472 | 0.1185  | -0.0179 | -0.3364 | 0.2717  |
| PY00072 | 0.0043  | -0.1008 | 0.0063  | -0.3856 | 0.1067  | 0.6975  | 0.2005  | -0.202  | 0.073   | -0.2393 | -0.1862 | -0.2541 |
| PY05975 | -0.1229 | 0.1193  | -0.0152 | -0.5289 | 0.1254  | -0.0546 | 0.1114  | -0.0451 | -0.1527 | -0.129  | 0.2323  | -0.0557 |
| PY05961 | -1.1161 | -0.069  | 0.2104  | -0.9964 | -1.0127 | -1.0457 | -0.2908 | -0.2178 | 0.3266  | -0.5122 | 0.5821  | -0.4826 |
| PY05865 | -0.3535 | -0.1815 | 0.1139  | 0.0067  | -0.202  | -0.3011 | -0.168  | -0.0123 | -0.1654 | -0.0004 | 0.3117  | -0.1055 |
| PY00222 | -0.0071 | 0.1811  | 0.2441  | -0.2408 | -0.2079 | -0.1946 | 0.2167  | -0.4067 | 0.1643  | -0.2743 | -0.2721 | 0.4095  |
| PY06769 | 1.0746  | 0.7618  | 0.8766  | 0.875   | -0.3933 | 0.2111  | 0.6535  | -0.098  | 0.2793  | -0.061  | -0.8954 | 0.5489  |
| PY04051 | 0.4356  | 0.1406  | 0.0854  | -0.3552 | 0.0564  | 0.0762  | 0.299   | -0.1173 | 0.0649  | -0.3521 | -0.1935 | 0.2404  |
| PY06118 | -0.4214 | -0.1899 | -0.254  | -0.7205 | -0.317  | -0.0907 | -0.0195 | -0.0775 | -0.0457 | -0.1636 | -0.0525 | -0.2903 |
| PY03808 | 0.7896  | 0.5388  | 0.4979  | -0.3753 | -0.2553 | 0.0412  | 0.3749  | -0.2095 | 0.2583  | -0.3252 | -0.5326 | 0.4471  |
| PY03126 | 0.3461  | 0.1554  | -0.0011 | 0.2712  | -0.1059 | -0.1287 | -0.1002 | -0.2804 | -0.0305 | -0.1057 | -0.0043 | -0.1258 |
| PY02056 | -1.6225 | -0.2184 | 0.5756  | -0.6424 | -0.5123 | -0.2564 | 0.0484  | 0.4399  | 0.7192  | 0.5802  | 0.7396  | 0.1169  |
| PY04050 | 0.3152  | 0.3347  | 0.9022  | 0.2395  | -0.1079 | 0.0342  | 0.8353  | -0.0571 | 0.5409  | 0.4086  | -0.0028 | 0.9061  |
| PY01850 | 0.5581  | 0.3976  | 0.1876  | 1.3728  | 0.3889  | 0.283   | 0.4508  | 0.0942  | 0.0642  | 0.4726  | -0.1217 | 0.5114  |
| PY01898 | -0.4236 | -0.1812 | 0.1136  | -0.1714 | -0.1254 | -0.5413 | -0.31   | -0.1591 | -0.3112 | 0.1258  | 0.1589  | -0.0859 |
| PY06100 | 0.1178  | -0.0858 | 0.3794  | 0.631   | 0.3102  | 0.0986  | -0.1336 | 0.0936  | -0.2606 | 0.1752  | 0.0429  | -0.139  |
| PY03930 | 0.901   | 0.1808  | -0.142  | 0.9021  | 0.3693  | 0.1106  | 0.02    | -0.2953 | -0.3009 | -0.0371 | -0.5205 | 0.0234  |
| PY03492 | 0.2032  | 0.6589  | -0.0785 | -0.1875 | 0.0429  | 0.0672  | -0.062  | 0.0777  | 0.3517  | 0.2572  | 0.1987  | 1.1132  |
| PY01817 | 0.2798  | -0.0062 | -0.101  | 0.4678  | 0.4982  | 0.3229  | 0.0456  | 0.2168  | -0.1378 | 0.2147  | 0.2306  | 0.4026  |
| PY05314 | -0.1027 | -0.0937 | -0.2091 | 0.1982  | 0.3273  | 0.0915  | -0.124  | 0.2609  | 0.0252  | 0.6741  | 0.0242  | -0.0175 |
| PY00190 | -0.2414 | -0.0138 | 0.2226  | -0.7976 | -0.1609 | 0.1151  | 0.2455  | -0.0749 | -0.0686 | -0.1669 | -0.3079 | 0.0567  |
| PY01257 | -0.1587 | 0.0652  | 0.1613  | 0.4806  | 0.3029  | 0.0625  | -0.1535 | 0.1239  | 0.0115  | -0.1656 | 0.6485  | -0.1362 |
| PY00068 | -0.0907 | 0.0734  | -0.1006 | -0.3321 | -0.243  | -0.2149 | -0.1427 | -0.0082 | -0.0927 | 0.1249  | 0.1043  | -0.1132 |
| PY00946 | -1.3333 | -0.3333 | -0.1679 | -0.5733 | -0.1252 | 0.0476  | -0.0956 | 0.1668  | -0.1349 | 0.1023  | 0.3119  | -0.5096 |
| PY05109 | -0.3857 | 0.2767  | -0.2841 | -0.1722 | 0.007   | -0.0849 | -0.1286 | 0.2038  | -0.0437 | 0.2395  | 0.3303  | -0.0646 |
| PY01222 | -0.2367 | -0.0475 | -0.0425 | 0.02    | -0.0836 | 0.0949  | -0.187  | 0.5364  | 0.0119  | 0.8164  | 0.2129  | -0.0151 |
| PY06078 | 0.1089  | -0.1801 | -0.2108 | 0.2944  | 0.09    | -0.0425 | -0.2516 | 0.1202  | -0.0351 | 0.2661  | -0.6868 | -0.0864 |
| PY02230 | 0.0205  | -0.111  | -0.1149 | -0.1086 | -0.0363 | 0.0154  | -0.1704 | -0.1426 | -0.2749 | -0.068  | -0.1457 | -0.1449 |
| PY03485 | 0.6499  | 0.2418  | 0.1166  | 0.0044  | 0.3279  | 0.2865  | 0.002   | -0.2924 | -0.2482 | -0.0223 | -0.1987 | 0.0062  |
| PY06500 | 0.1282  | 0.5137  | 0.0798  | -0.035  | 0.45    | 0.0761  | 0.0113  | 0.3879  | 0.2012  | -0.1289 | 0.3442  | -0.4801 |
| PY07143 | -0.4599 | 0.6444  | 0.5641  | 0.6616  | 0.5106  | 0.4325  | 0.1873  | -0.0483 | 0.0053  | -0.0279 | 0.4333  | -0.382  |
| PY01220 | -0.0323 | -0.1034 | 0.1244  | 0.0917  | 1.1178  | -0.0444 | -0.0524 | -0.4026 | -0.3627 | -0.2561 | 0.0384  | 0.0157  |
| PY05167 | -0.4064 | -0.1001 | 0.2866  | 0.2503  | -0.3211 | -0.0752 | 0.4693  | 0.3377  | 0.6232  | 0.1384  | 0.404   | 0.5737  |

|         |         |         |         |         |         |         |         |         |         |         |         |         |
|---------|---------|---------|---------|---------|---------|---------|---------|---------|---------|---------|---------|---------|
| PY07310 | 0.0009  | 0.0499  | 0.053   | -0.0463 | 0.0999  | 0.1453  | 0.0914  | 0.1019  | 0.2238  | 0.3614  | -0.0674 | 0.7193  |
| PY00024 | -0.3762 | 0.1396  | -0.1086 | -0.5001 | -0.2009 | -0.1924 | 0.1124  | 0.2847  | 0.2562  | 0.0667  | 0.7302  | -0.2884 |
| PY05915 | 0.6451  | 0.3799  | 0.4397  | -0.1604 | 0.1026  | 0.3154  | 0.4381  | -0.0584 | 0.1345  | -0.1477 | -0.1973 | 0.5709  |
| PY01992 | 0.2276  | 0.0739  | 0.1444  | 0.4833  | 0.055   | 0.1758  | 0.0677  | -0.1363 | 0.0818  | -0.6351 | -0.3901 | 0.2275  |
| PY00598 | 0.1583  | 0.3844  | 0.1174  | 0.196   | 0.0921  | 0.1736  | 0.26    | -0.2138 | 0.1198  | -0.1651 | -0.5184 | 0.2064  |
| PY03803 | 0.155   | -0.1078 | 0.0878  | -0.0481 | 0.2253  | -0.0595 | 0.5757  | 0.1962  | 0.6548  | 0.1038  | 0.0319  | 0.9004  |
| PY05534 | 0.0569  | -0.083  | -0.2631 | -0.2892 | 0.0701  | 0.0219  | -0.0418 | -0.3679 | -0.1109 | -0.5364 | -0.3657 | -0.082  |
| PY06251 | 0.2063  | 0.0615  | 0.0772  | 0.5841  | 0.3175  | 0.0569  | -0.0786 | -0.167  | -0.1813 | 0.1608  | -0.0664 | 0.1438  |
| PY06633 | -0.325  | -0.2209 | -0.3217 | 1.2387  | 0.5402  | 0.4401  | -0.3662 | 0.652   | 0.0513  | 0.4949  | 1.0122  | -0.1387 |
| PY00059 | -0.1686 | -0.4763 | -1.1395 | 0.1513  | 0.2796  | -0.3174 | -0.1761 | -0.1526 | 0.0966  | -0.3259 | -0.3361 | 0.2928  |
| PY02434 | -1.1803 | -0.3407 | -0.3935 | -0.2099 | -0.4753 | -0.2606 | 0.015   | 0.273   | 0.5217  | 0.0608  | 0.0182  | -0.3078 |
| PY06848 | -0.9383 | -0.2281 | -0.3703 | -0.2345 | -0.249  | -0.5591 | -0.073  | 0.1581  | -0.0485 | 0.2337  | 0.9246  | -0.06   |
| PY04469 | -0.4534 | -0.091  | -0.357  | -1.1189 | -0.3162 | -0.1778 | 0.2294  | -0.0613 | 0.417   | -0.5098 | 0.1531  | 0.0787  |
| PY03951 | -0.3374 | 0.085   | 0.4305  | 0.0927  | -0.2316 | 0.1186  | 0.1519  | -0.1509 | -0.2101 | 0.0598  | -0.1445 | 0.0902  |
| PY03084 | 0.136   | -0.1907 | 0.5972  | 0.0074  | -0.1879 | -0.0266 | 0.3803  | -0.1791 | -0.0134 | -0.191  | -0.4646 | 0.101   |
| PY01505 | 0.1091  | 0.4297  | 0.4803  | 0.2452  | -0.0811 | 0.549   | 0.3229  | -0.3529 | -0.295  | -0.0743 | -0.7096 | -0.1503 |
| PY00005 | -0.3518 | 0.0109  | -0.3689 | -0.2349 | -0.1557 | -0.6137 | -0.1496 | 0.1103  | 0.1029  | 0.3803  | 1.0563  | -0.1114 |
| PY07362 | -0.0242 | 0.1946  | 0.3301  | 0.2631  | -0.2075 | -0.0507 | -0.1546 | -0.343  | -0.054  | -0.1384 | -0.2607 | -0.3404 |
| PY05224 | -0.2723 | 0.2016  | -0.0522 | -0.201  | 0.1385  | 0.2517  | 0.1309  | -0.1541 | -0.6053 | -0.3023 | -0.1117 | -0.0332 |
| PY04460 | -0.5507 | -0.2136 | -0.1518 | 0.3202  | -0.1418 | 0.092   | -0.0597 | 0.5647  | 0.0647  | 0.365   | -0.2274 | -0.3839 |
| PY00600 | 0.2275  | 0.1661  | 0.4049  | 0.0307  | 0.0554  | -0.0419 | 0.0153  | -0.1535 | -0.1478 | 0.0474  | -0.1422 | 0.2246  |
| PY00971 | -0.0202 | -0.1418 | -0.2473 | -0.5297 | 0.0306  | -0.2612 | -0.4961 | -0.2479 | -0.1496 | -0.2637 | -0.0231 | -0.0973 |
| PY06579 | -0.0454 | -0.1108 | -0.0372 | -0.1657 | 0.023   | -0.0871 | -0.042  | 0.054   | -0.0925 | -0.1138 | 0.0248  | -0.1167 |
| PY02014 | -1.3307 | -0.281  | -0.2862 | -0.2032 | -0.093  | 0.1298  | 0.3025  | 0.5241  | 0.7881  | 0.2271  | 0.7062  | 0.3408  |
| PY01607 | -0.7339 | -0.0571 | -0.3115 | -0.3799 | -0.4576 | -0.5753 | -0.0582 | -0.2716 | 0.157   | 0.0557  | -0.146  | 0.1989  |
| PY02157 | -0.2391 | -0.1366 | -0.105  | -0.2151 | 0.2129  | 0.0696  | 0.1701  | 0.1694  | 0.119   | -0.1111 | 0.053   | 0.0497  |
| PY07478 | 0.2849  | 0.1193  | -0.1839 | 0.5989  | 0.2383  | -0.0357 | -0.2021 | 0.2702  | 0.0057  | 0.5935  | -0.2878 | -0.0183 |
| PY00240 | 0.3885  | -0.1396 | -0.0175 | 0.5823  | 0.323   | -0.0458 | -0.0684 | -0.1666 | -0.5584 | 0.0612  | -0.1506 | -0.1364 |
| PY03536 | 0.77    | 0.2864  | 0.0214  | 0.1006  | 0.1027  | -0.0823 | -0.0936 | -0.3135 | -0.1756 | -0.0441 | -0.3138 | 0.4599  |
| PY00063 | -0.1787 | -0.0027 | -0.266  | 0.5474  | 0.0455  | -0.1947 | 0.0197  | 0.1437  | -0.4413 | 0.0696  | -0.1354 | 0.1305  |
| PY01733 | -0.0136 | 0.3119  | 0.4042  | 0.2803  | 0.0624  | 0.2006  | 0.062   | -0.1732 | -0.2911 | 0.0326  | -0.3291 | -0.0747 |
| PY01803 | -0.182  | -0.0545 | -0.2351 | -1.2946 | -0.4828 | 0.125   | -0.1362 | -0.1828 | 0.0961  | -0.8669 | -0.1642 | 0.0422  |
| PY00618 | 0.7544  | 0.4955  | 0.38    | 0.2306  | -0.1981 | -0.027  | -0.1001 | -0.2763 | 0.0849  | -0.1058 | -0.6966 | 0.0543  |
| PY03883 | 0.1185  | 0.1077  | 0.1355  | -0.2484 | 0.0759  | -0.1341 | 0.0722  | -0.0216 | -0.0786 | -0.4847 | -0.1892 | 0.1094  |
| PY07325 | 0.2048  | -0.0523 | -0.1583 | 0.5733  | 0.2378  | -0.1486 | -0.0706 | 0.0205  | -0.1568 | 0.1598  | 0.2894  | -0.2411 |
| PY04558 | -0.0062 | -0.1579 | -0.111  | 0.0961  | 0.1971  | -0.1248 | -0.0627 | 0.0241  | 0.0909  | -0.1785 | 0.0833  | 0.182   |
| PY02348 | 0.2474  | 0.2307  | 0.0566  | -0.3048 | 0.0165  | 0.2139  | 0.0731  | -0.1296 | -0.1334 | -0.1081 | -0.2748 | 0.0862  |
| PY01709 | 0.2011  | -0.2791 | -0.0388 | -0.1513 | 0.1296  | 0.1568  | 0.2687  | -0.007  | 0.1624  | 0.4781  | 0.1297  | 0.2955  |
| PY03021 | 0.4151  | 0.5016  | 0.568   | 0.1456  | -0.0184 | -0.1115 | 0.0597  | -0.124  | 0.2074  | -0.3053 | -0.1977 | 0.2408  |
| PY06456 | 0.2174  | 0.124   | 0.0434  | 0.1388  | 0.041   | 0.2979  | 0.1226  | 0.0203  | 0.0719  | 0.2239  | -0.3284 | 0.3848  |
| PY03254 | -0.2687 | -0.059  | -0.1986 | 0.3756  | -0.0974 | -0.0156 | -0.0949 | 0.1922  | -0.2907 | 0.5445  | 0.0394  | -0.3971 |
| PY06190 | -0.0967 | -0.6416 | -0.2198 | 0.2572  | -0.3411 | -0.032  | 0.1075  | 0.1645  | 0.3026  | 0.7802  | 0.2711  | 0.5267  |
| PY06483 | 0.6873  | 0.6192  | 0.4414  | -0.1743 | -0.0926 | 0.2357  | 0.2062  | -0.1495 | 0.1751  | -0.1334 | -0.1915 | 0.1253  |
| PY07162 | 0.2239  | 0.0625  | 0.3248  | -0.3739 | -0.1633 | -0.4238 | 0.0205  | -0.1889 | 0.3     | 0.0257  | -0.2579 | 0.2153  |
| PY06994 | 0.8122  | 0.2043  | -0.0276 | 0.1499  | -0.1718 | -0.0063 | 0.1863  | -0.3274 | 0.2072  | -0.1359 | -0.4266 | 0.3828  |
| PY05250 | -0.9665 | -0.5658 | -0.0564 | 0.2087  | -0.6888 | -0.4056 | -0.3117 | -0.2557 | 0.0151  | 0.0853  | 0.5496  | 0.0924  |
| PY00344 | 0.148   | 0.1524  | 0.1919  | 0.195   | 0.283   | -0.2206 | -0.1697 | -0.2884 | -0.3224 | 0.2414  | -0.027  | -0.0165 |
| PY03270 | -0.2873 | -0.0252 | -0.2624 | -0.3385 | -0.2331 | -0.2287 | -0.0963 | 0.0152  | 0       | -0.2252 | -0.3178 | -0.5467 |
| PY06873 | -0.3524 | -0.256  | 0.0851  | 0.4144  | 0.1611  | -0.3006 | -0.3017 | -0.0967 | -0.0541 | 0.5803  | 0.6885  | -0.0042 |
| PY03307 | 0.008   | -0.0413 | 0.1249  | -0.1567 | -0.1461 | -0.0158 | 0.0592  | -0.0986 | -0.0295 | -0.2945 | 0.1443  | -0.0862 |
| PY04508 | 0.2766  | -0.2061 | 0.1218  | -0.7476 | -0.0217 | -0.1428 | 0.1737  | -0.2351 | 0.1726  | -0.0351 | -0.1162 | 0.5318  |
| PY04094 | 0.688   | 0.0065  | -0.4209 | 0.3213  | -0.0937 | -0.2192 | -0.2041 | -0.2766 | -0.2231 | 0.0905  | -0.3619 | 0.0216  |
| PY01808 | -0.027  | -0.2945 | -0.3023 | -0.3605 | -0.2307 | -0.2475 | 0.2287  | 0.0119  | 0.0702  | -0.1363 | -0.236  | 0.1531  |
| PY04506 | -0.1551 | 0.0211  | 0.4761  | 0.2051  | 0.1088  | -0.4971 | -0.3154 | -0.1967 | 0.1366  | -0.0206 | 1.3923  | -0.1265 |
| PY00907 | 0.4606  | 0.1034  | 0.1759  | -0.0144 | 0.8383  | 0.029   | 0.012   | -0.5372 | -0.2952 | -0.7127 | -0.4954 | -0.5069 |
| PY02996 | 0.1087  | -0.1397 | -0.1761 | 0.1055  | 0.2545  | 0.0714  | -0.0729 | 0.0803  | -0.0171 | 0.1266  | -0.0109 | -0.2651 |
| PY05938 | -0.1164 | -0.1353 | -0.0985 | 0.0317  | 0.2602  | -0.0595 | -0.1328 | -0.2647 | -0.1346 | 0.2627  | 0.3703  | 0.0684  |
| PY00981 | 0.2778  | 0.0831  | 0.2194  | 0.0419  | 0.154   | -0.1269 | 0.4475  | -0.0835 | -0.1626 | 0.4926  | 0.0366  | 0.5495  |
| PY06543 | 1.032   | 0.8315  | 0.4271  | -0.0603 | 0.1022  | 0.1232  | 0.2872  | -0.0227 | 0.2618  | -0.0365 | -0.1709 | 0.058   |
| PY03354 | 0.5216  | 0.2386  | 0.5078  | 0.2253  | -0.1939 | 0.0312  | 0.4094  | -0.1845 | 0.1538  | -0.1361 | -0.4196 | 0.2831  |
| PY05380 | 0.0302  | -0.2106 | -0.3953 | 0.1363  | 0.4347  | 0.1657  | 0.1405  | -0.2089 | -0.1869 | 0.2404  | -0.2686 | 0.1742  |
| PY01573 | 1.0439  | 0.3125  | 0.5427  | 0.4367  | 0.236   | 0.1156  | 0.166   | -0.1862 | -0.0215 | -0.0957 | -0.3862 | 0.1942  |
| PY06109 | 0.0743  | 0.0567  | 0.053   | 0.5294  | -0.2509 | 0.0266  | 0.0283  | 0.215   | 0.1642  | -1.1595 | -0.3478 | -0.1076 |

|         |         |         |         |         |         |         |         |         |         |         |         |         |
|---------|---------|---------|---------|---------|---------|---------|---------|---------|---------|---------|---------|---------|
| PY02884 | -0.1388 | -0.0598 | 0.0616  | -0.0887 | -0.0096 | 0.1799  | -0.1006 | 0.0221  | -0.291  | -0.2736 | -0.2745 | -0.1696 |
| PY01776 | -0.0405 | -0.0809 | -0.21   | -0.2206 | 0.149   | -0.0384 | 0.146   | -0.0361 | -0.0243 | -0.4454 | -0.0656 | -0.0085 |
| PY02492 | -0.6876 | -0.1397 | -0.1366 | 0.1758  | -0.1219 | -0.2748 | -0.216  | 0.1627  | 0.2538  | 0.263   | 0.7021  | -0.1372 |
| PY04953 | -0.4458 | -0.9322 | -0.1897 | 0.6479  | 0.2297  | 0.067   | 0.1635  | 0.3565  | 0.0589  | 0.7362  | 0.0774  | -0.0819 |
| PY02751 | -0.5962 | -0.2815 | -0.3459 | 0.3731  | 0.2291  | 0.0256  | -0.0615 | 0.0014  | -0.1037 | 0.0402  | 0.1961  | 0.1672  |
| PY01851 | -0.3091 | -0.004  | -0.0077 | 0.0738  | -0.0941 | 0.1963  | 0.1422  | 0.1577  | -0.0345 | -0.1189 | 0.1664  | 0.1919  |
| PY01893 | 0.0252  | -0.1547 | -0.0046 | 0.1329  | 0.6023  | 0.2637  | -0.1789 | 0.0687  | -0.1259 | 0.0835  | 0.2038  | -0.0651 |
| PY01399 | -0.2666 | -0.2288 | 0.0602  | -0.0846 | 0.0765  | -0.1196 | -0.3043 | 0.0535  | -0.1651 | 0.2171  | 0.1251  | -0.3561 |
| PY00277 | 0.2367  | 0.0799  | -0.0544 | -0.16   | 0.1297  | -0.2704 | -0.019  | -0.0851 | 0.1008  | -0.1495 | -0.3334 | 0.0587  |
| PY01718 | -0.5857 | -0.4008 | -0.2739 | -0.1106 | 0.1407  | 0.0083  | -0.1008 | -0.1639 | -0.2254 | 0.3612  | 0.1845  | -0.008  |
| PY00131 | 0.7526  | 0.3417  | 0.9876  | 0.5587  | -0.0951 | -0.1784 | 0.12    | -0.5837 | 0.0055  | -0.2684 | -0.6686 | 0.2609  |
| PY04595 | -0.7697 | -0.7938 | -0.9167 | 0.093   | 1.3403  | 0.1452  | -0.0313 | 0.1469  | -0.2514 | 0.0599  | -0.1191 | -0.4695 |
| PY03667 | 0.0305  | -0.0105 | 0.031   | 0.1708  | -0.2007 | -0.0596 | -0.0149 | -0.0818 | 0.0319  | -0.1725 | -0.0908 | 0.139   |
| PY00862 | 0.0493  | 0.0044  | -0.0669 | 0.1509  | 0.5329  | 0.2538  | 0.2751  | 0.134   | 0.4132  | 0.0552  | 0.2276  | 0.1311  |
| PY04612 | 0.0491  | -0.2977 | -0.1536 | -0.037  | 0.5046  | 0.4019  | -0.0386 | -0.014  | -0.1503 | 0.2975  | -0.2312 | 0.2029  |
| PY00135 | -0.9204 | -0.2133 | -0.0387 | -0.6394 | -0.4386 | -0.4982 | -0.3269 | 0.0312  | -0.1317 | 0.0629  | 0.4233  | -0.0739 |
| PY07833 | -0.865  | -0.2481 | 0.0582  | 0.0081  | -0.2548 | 0.0158  | -0.1539 | 0.2966  | -0.0432 | -0.1915 | 0.3016  | -0.372  |
| PY02435 | 0.1712  | 0.1263  | -0.1971 | 0.4511  | 0.4995  | 0.0375  | 0.0593  | -0.0753 | -0.0557 | -0.0336 | -0.3513 | 0.2142  |
| PY04340 | -0.0846 | -0.346  | -0.1757 | 0.5089  | 0.6691  | 0.4315  | -0.0216 | -0.0255 | -0.1716 | 0.4643  | 0.1353  | 0.3915  |
| PY01165 | 0.0392  | 0.1027  | 0.1713  | -0.5102 | -0.2628 | -0.2127 | 0.0045  | -0.0731 | 0.1685  | -0.5104 | 0.0228  | 0.0578  |
| PY00025 | 0.0071  | -0.0543 | -0.1261 | 0.8188  | 0.2711  | 0.5028  | 0.1728  | -0.0162 | -0.0903 | 0.1301  | 0.0587  | -0.1952 |
| PY00915 | -0.0963 | -0.2711 | -0.1634 | 0.394   | 0.5919  | -0.0905 | -0.2004 | 0.0504  | 0.0036  | 0.184   | 0.0304  | -0.4804 |
| PY03313 | -0.2247 | -0.1529 | 0.0056  | 0.2204  | 0.0889  | -0.0703 | -0.086  | -0.1472 | -0.0675 | 0.1366  | 0.0282  | 0.0141  |
| PY02518 | -0.0165 | 0.0222  | -0.0071 | 0.1657  | 0.0005  | -0.0965 | -0.1111 | 0.3096  | 0.4006  | 0.0826  | 0.1649  | -0.1583 |
| PY07276 | 0.1886  | 0.1672  | -0.0796 | 0.0479  | 0.0486  | -0.3033 | -0.1632 | -0.5788 | -0.3817 | -0.54   | -0.4523 | -0.2599 |
| PY07169 | -0.0773 | 0.0531  | -0.0487 | 2.2868  | 1.0884  | 0.979   | 0.2093  | 1.2285  | 0.1509  | 0.7781  | 1.4881  | -0.0457 |
| PY01093 | 0.474   | 0.2609  | 0.2162  | 0.1705  | 0.0341  | 0.1685  | 0.0836  | -0.1926 | -0.132  | 0.1022  | -0.1456 | -0.0016 |
| PY07142 | 0.3885  | 0.1707  | -0.0549 | 0.5268  | 0.1385  | 0.1309  | -0.0234 | -0.3921 | -0.1548 | -0.0674 | -0.4509 | -0.1509 |
| PY07206 | 0.7495  | 0.0907  | -0.0158 | 0.2146  | 0.1238  | 0.1485  | 0.1449  | -0.0674 | 0.142   | -0.0965 | -0.1033 | 0.3209  |
| PY06554 | -0.2809 | -0.1596 | -0.0304 | 0.108   | 0.0231  | -0.0714 | 0.0847  | 0.086   | 0.2338  | 0.3395  | 0.3591  | 0.2304  |
| PY03640 | 0.0454  | -0.0373 | 0.1905  | 0.4538  | 0.1534  | -0.07   | -0.0562 | -0.0068 | -0.2331 | -0.2425 | 0.2643  | 0.034   |
| PY05528 | -0.379  | -0.032  | -0.0813 | -0.0754 | 0.2119  | -0.1179 | 0.2387  | 0.1995  | 0.3388  | -0.0622 | 0.4185  | 0.3723  |
| PY01392 | -0.2227 | -0.5068 | -1.2916 | 0.7222  | 0.657   | 0.1115  | -0.2126 | 0.2993  | 0.0809  | 0.4314  | 0.0274  | 0.1853  |
| PY05768 | 0.1743  | 0.0205  | 0.1218  | -0.2219 | -0.1545 | -0.0715 | 0.1148  | -0.3598 | -0.0014 | -0.6577 | -0.2028 | 0.1503  |
| PY05749 | 0.1609  | 0.1615  | 0.1183  | -0.3989 | -0.1668 | -0.1293 | -0.1867 | -0.1318 | -0.0699 | -0.1045 | -0.3006 | -0.1354 |
| PY05852 | 0.2445  | 0.0804  | 0.3668  | -0.0065 | -0.0124 | -0.0469 | 0.0235  | -0.0365 | 0.1008  | 0.2336  | -0.1812 | 0.102   |
| PY03049 | -0.5222 | -0.1777 | 0.019   | 0.0614  | 0.0541  | -0.1989 | -0.3361 | -0.0075 | 0.0116  | 0.2598  | 0.2799  | 0.0617  |
| PY01124 | -0.6855 | -0.3248 | -0.3711 | -1.0128 | -0.4185 | 0.0643  | 0.1501  | 0.4325  | 0.4236  | 0.2608  | 0.976   | 0.1037  |
| PY03424 | 0.0131  | -0.0496 | -0.2386 | 0.2968  | 0.3862  | 0.0086  | -0.0254 | 0.2331  | -0.0601 | 0.2532  | 0.4163  | -0.0506 |
| PY06206 | 0.5288  | 0.4607  | 0.4187  | 0.0832  | -0.7458 | -0.1793 | 0.2292  | -0.241  | 0.2889  | -0.4116 | -0.3902 | 0.3421  |
| PY00274 | -0.7242 | -0.1699 | -0.0315 | 0.3184  | -0.1142 | -0.1121 | -0.0177 | 0.3581  | -0.1764 | 0.2193  | 0.3274  | -0.6139 |
| PY04724 | 0.0811  | 0.1316  | -0.0144 | -0.5738 | -0.4033 | -0.1588 | -0.0636 | 0.044   | 0.2551  | -0.0737 | 0.0592  | 0.1727  |
| PY01768 | 0.1427  | -0.0827 | -0.2892 | -0.1568 | 0.1564  | -0.0184 | -0.0791 | 0.1807  | 0.2088  | 0.0112  | 0.3433  | -0.0797 |
| PY04698 | 0.5206  | 0.3304  | -0.4067 | 0.3703  | 0.4148  | 0.1766  | 0.0438  | 0.119   | -0.9655 | 0.4118  | 0.0045  | -0.4477 |
| PY02638 | -0.1386 | -0.4317 | -0.3378 | -0.3045 | 0.0873  | -0.3943 | -0.4152 | -0.3433 | -0.3078 | -0.1464 | 0.018   | -0.3351 |
| PY05602 | -0.5707 | -0.0428 | 0.1911  | 0.0024  | -0.0103 | 0.2991  | 0.305   | 0.2702  | 0.5079  | 0.1801  | 0.2522  | 0.0086  |
| PY05430 | -0.6511 | -0.1663 | 0.0903  | 0.0126  | 0.0707  | -0.2402 | -0.3774 | -0.3689 | -0.1045 | -0.7437 | -0.5733 | -0.5119 |
| PY01536 | -0.5013 | -0.3395 | -0.379  | -0.594  | -0.0646 | 0.0098  | 0.1295  | 0.115   | -0.1258 | -0.44   | -0.0328 | -0.1311 |
| PY04609 | 0.3556  | -0.0651 | 0.1497  | 0.3696  | 0.4245  | -0.0035 | 0.0146  | 0.1974  | -0.1343 | 0.49    | 0.3029  | -0.2132 |
| PY05448 | -0.3172 | -0.0608 | -0.1624 | -0.108  | -0.1601 | 0.009   | -0.0613 | -0.1643 | 0.3235  | 0.2098  | -0.1105 | 0.2154  |
| PY06625 | 0.8203  | 0.6499  | 0.6292  | -0.0467 | -0.4925 | 0.186   | 0.4293  | -0.2842 | 0.2696  | -0.2888 | -0.4047 | 0.3787  |
| PY06614 | -0.7389 | -0.0609 | -0.1158 | -0.2813 | 0.2471  | 0.1558  | -0.0438 | 0.0611  | -0.0497 | 0.1265  | 0.3959  | 0.0637  |
| PY05089 | 0.2307  | -0.1002 | 0.0291  | -0.4204 | 0.0898  | -0.3959 | 0.3224  | -0.2633 | -0.5015 | -0.2149 | 0.9251  | 0.0875  |
| PY05624 | 0.3044  | -0.128  | -0.1036 | -0.2437 | -0.0625 | 0.0491  | -0.0262 | 0.0194  | -0.0343 | -0.2167 | 1.8734  | -0.2887 |
| PY07370 | 0.6352  | 0.4752  | 0.5668  | 0.1292  | 0.2529  | -0.0264 | -0.1886 | -0.1607 | -0.0815 | -0.0472 | -0.6902 | -0.2579 |
| PY04344 | 0.3367  | 0.2623  | 0.4276  | -0.0373 | -0.0537 | 0.0123  | -0.1756 | -0.3579 | -0.2561 | -0.2643 | -0.3754 | -0.2519 |
| PY06668 | -1.2171 | -0.5244 | -0.2953 | -0.4393 | -0.282  | -0.2948 | -0.0467 | 0.404   | 0.4048  | 0.0417  | 0.202   | -0.159  |
| PY00178 | -0.1981 | 0.0809  | 0.2114  | 0.1793  | -0.301  | -0.2856 | 0.1549  | -0.0541 | 0.1069  | -0.3779 | -0.1333 | 0.2148  |
| PY03038 | -0.2207 | -0.5908 | -0.3255 | 0.1022  | 0.5694  | 0.0381  | 0.0804  | -0.3088 | -0.1496 | -0.2158 | 0.2542  | 0.2888  |
| PY04526 | -0.172  | -0.0042 | -0.5545 | 0.0545  | 0.3279  | -0.2201 | -0.4602 | 0.2122  | -0.2435 | 0.0361  | 0.0094  | -0.1674 |
| PY05452 | -1.2449 | -0.1821 | 0.2694  | -0.3101 | -0.0485 | -0.584  | -0.406  | -0.012  | 0.3798  | 0.1799  | 0.2441  | -0.3021 |
| PY06340 | 0.3739  | 0.2194  | 0.1628  | 0.1235  | -0.0476 | 0.0869  | 0.0365  | 0.0339  | 0.0073  | -1.243  | -0.1523 | -0.1854 |
| PY06142 | 0.0833  | 0.0103  | 0.191   | -0.6918 | -0.0306 | 0.2963  | 0.0903  | -0.4311 | -0.1787 | -0.5023 | -0.2155 | 0.0252  |

|         |         |         |         |         |         |         |         |         |         |         |         |         |
|---------|---------|---------|---------|---------|---------|---------|---------|---------|---------|---------|---------|---------|
| PY05001 | 0.575   | 0.5694  | 0.4591  | 0.3389  | 0.0456  | 0.371   | 0.1538  | -0.2906 | -0.1334 | -0.4148 | -0.8712 | -0.0509 |
| PY07066 | -0.2065 | -0.1825 | -0.2549 | -0.3255 | -0.4764 | -0.1779 | 0.0023  | 0.0451  | 0.0945  | 0.2882  | 0.1657  | 0.2963  |
| PY03766 | -0.705  | 0.2057  | 0.356   | -0.688  | -0.3661 | 0.012   | 0.4204  | -0.4784 | 0.3682  | -0.3986 | 0.3478  | -0.4822 |
| PY01221 | -0.1359 | -0.0888 | -0.8814 | 0.1242  | 0.4904  | 0.0421  | -0.2509 | 0.0392  | -0.1788 | -0.1646 | 0.2047  | -0.045  |
| PY00582 | 0.5377  | 0.3879  | 0.5011  | 0.3624  | 0.0395  | 0.1971  | 0.0526  | -0.0868 | -0.0786 | 0.1025  | -0.3843 | -0.0106 |
| PY07230 | -0.0322 | 0.0021  | 0.0766  | -0.1566 | -0.0516 | -0.1964 | 0.0453  | -0.0708 | 0.0402  | -0.1564 | -0.0921 | 0.0188  |
| PY04363 | 1.4731  | 0.8385  | 0.9051  | 0.1934  | -0.1297 | 0.4069  | 1.2066  | -0.0604 | 0.3542  | 0.1432  | -0.4171 | 0.8127  |
| PY00289 | -0.607  | -0.3198 | -0.7144 | -0.3403 | -0.2871 | 0.0899  | 0.2242  | -0.142  | -0.0348 | 0.1131  | 1.5026  | -0.1212 |
| PY07840 | -0.7151 | -0.2013 | -0.3054 | -0.008  | -0.3633 | -0.3108 | -0.4051 | 0.2005  | -0.0511 | 0.0121  | 0.5989  | -0.1963 |
| PY03271 | 0.2862  | -0.2499 | -0.5017 | -0.2077 | -0.1081 | -0.242  | -0.0417 | -0.0605 | -0.3    | -0.102  | -0.1872 | 0.2032  |
| PY06971 | 0.4245  | 0.2929  | 0.3144  | -0.2743 | -0.5885 | 0.039   | 0.1018  | -0.1    | 0.1275  | -0.1362 | -0.2298 | 0.1851  |
| PY02274 | 0.6217  | 0.0377  | -0.0074 | -0.2242 | 0.0256  | 0.0723  | 0.0547  | -0.0129 | 0.0795  | -0.0887 | 0.1083  | 0.2427  |
| PY07349 | 1.1672  | 0.7608  | 0.4498  | -0.1485 | -0.5409 | 0.0654  | 0.2775  | -0.0789 | 0.2802  | -0.0438 | -0.6189 | 0.1182  |
| PY01972 | -0.3047 | -0.189  | -0.1254 | -0.6266 | -0.2284 | -0.874  | -0.4371 | -0.6272 | 0.0781  | -0.5222 | 0.2136  | -0.2093 |
| PY02216 | -0.5274 | -0.1691 | 0.1115  | -0.5742 | -0.1372 | -0.3776 | -0.3487 | -0.4297 | -0.3804 | -0.5736 | -0.2418 | -0.554  |
| PY02778 | -0.0376 | -0.25   | -0.5095 | -0.1428 | -0.0142 | -0.4095 | -0.2437 | -0.3067 | -0.382  | -0.2862 | 0.0395  | 0.0309  |
| PY05021 | 0.1431  | -0.1828 | -0.0534 | -0.0951 | 0.3887  | 0.0497  | 0.2179  | -0.3567 | -0.5041 | -0.5145 | -0.227  | -0.7802 |
| PY05458 | -0.2678 | 0.2352  | 0.3081  | -0.0197 | 0.4155  | -0.1644 | -0.0832 | -0.0762 | 0.0535  | -0.1025 | 0.5126  | -0.0101 |
| PY04272 | -0.7077 | -0.098  | -0.5121 | -0.1766 | 0.6151  | 0.1957  | -0.0981 | 0.0798  | -0.0729 | 0.1814  | -0.0994 | -0.2132 |
| PY00823 | 0.5732  | 0.1839  | 0.2311  | 0.4048  | 0.333   | 0.0762  | 0.0173  | -0.1215 | 0.3619  | 0.407   | -0.2123 | -0.2983 |
| PY02799 | 0.2667  | 0.104   | -0.5498 | 0.5452  | 0.4011  | -0.1224 | -0.3694 | -0.1331 | -0.6515 | -0.7172 | 0.0059  | 0.3928  |
| PY04266 | 0.3676  | 0.1362  | 0.0785  | -1.008  | -0.4009 | -0.1777 | 0.0479  | -0.133  | -0.0642 | -0.8901 | -0.2838 | -0.179  |
| PY03796 | -0.6321 | -0.0227 | 0.1753  | -0.2106 | 0.0315  | -0.0717 | -0.0712 | 0.2464  | 0.3201  | 0.0318  | 0.6315  | 0.0639  |
| PY00404 | -0.9993 | -0.0286 | 0.1664  | -0.2981 | -0.4639 | -0.098  | -0.044  | 0.028   | -0.1591 | -0.0497 | 0.5861  | -0.4018 |
| PY06654 | -0.4519 | -0.287  | -0.2265 | 0.2203  | -0.0287 | -0.1927 | -0.1847 | -0.0793 | -0.214  | -0.2452 | 0.2901  | 0.0744  |
| PY04714 | 0.2473  | -0.2571 | -0.553  | -0.2453 | 0.2389  | -0.3259 | -0.454  | 0.0737  | -0.2023 | -0.1128 | -0.0493 | -0.2482 |
| PY01500 | -0.4821 | -0.4344 | 0.0065  | 0.2408  | 0.4024  | 0.5011  | 0.2868  | 0.0434  | -0.0839 | 0.5328  | -0.0903 | 0.4105  |
| PY01982 | -0.2277 | -0.8096 | -0.3145 | 0.853   | 0.7181  | 0.6815  | -0.812  | 0.7666  | -0.2247 | 2.4793  | 0.8766  | -0.0702 |
| PY01245 | 0.1603  | -0.5307 | -0.7307 | 0.2494  | 0.5335  | -0.1238 | -0.2027 | -0.1456 | 0.0371  | 0.239   | -0.3344 | -0.0084 |
| PY00169 | 0.0079  | 0.3956  | 0.4625  | 0.3029  | -0.8063 | -0.2019 | -0.0947 | 0.0094  | 0.2389  | 0.4658  | 0.1319  | 0.1931  |
| PY06026 | -0.34   | 0.1129  | -0.123  | 0.0331  | 0.0171  | 0.2985  | 0.1346  | 0.5506  | 0.1923  | -0.0622 | -0.4793 | -0.4999 |
| PY00255 | -0.2531 | -0.2147 | -0.2552 | -0.2861 | -0.0405 | -0.0915 | -0.0965 | 0.1539  | -0.1575 | -0.0157 | 0.046   | 0.0334  |
| PY07444 | -0.2873 | -0.1158 | -0.02   | 0.7699  | 0.1005  | -0.1472 | -0.2026 | 0.3512  | 0.2723  | 0.5298  | 0.3908  | -0.0225 |
| PY02021 | -0.0925 | -0.2875 | -0.2592 | -0.11   | 0.2777  | 0.2001  | -0.0536 | -0.1356 | -0.3616 | -0.0511 | 0.0164  | -0.329  |
| PY06371 | 0.0702  | 0.0214  | -0.283  | 0.2536  | 0.4937  | 0.5463  | 0.2073  | -0.0617 | 0.1877  | 0.8219  | 0.0234  | 0.1522  |
| PY02864 | -0.6127 | 0.0835  | 0.1358  | -0.1255 | -0.3798 | -0.1184 | 0.0831  | 0.4424  | 0.2469  | -0.1633 | 0.3101  | -0.3539 |
| PY00386 | 0.0259  | 0.0928  | 0.3058  | -0.0307 | 0.0072  | 0.352   | 0.3981  | -0.2079 | 0.3004  | 0.0115  | -0.0575 | 0.1348  |
| PY05462 | -0.0192 | 0.01    | -0.2457 | 0.3427  | -0.0924 | -0.1068 | -0.3368 | 0.2052  | -0.4077 | 0.3056  | 0.3939  | -0.0604 |
| PY00901 | -0.6177 | -0.1964 | -0.2686 | 0.2993  | 0.1802  | -0.1176 | -0.0867 | -0.0301 | -0.0155 | -0.2516 | 0.0587  | 0.0131  |
| PY03863 | -0.1179 | -0.354  | -0.5868 | -0.0089 | -0.0439 | -0.1116 | -0.1041 | 0.0364  | -0.1879 | -0.1778 | 0.0425  | 0.0777  |
| PY00756 | -0.3677 | 0.0527  | 0.1105  | 0.568   | -0.2034 | 0.2523  | -0.1521 | 0.1118  | -0.1158 | -0.4456 | -0.1549 | -0.1229 |
| PY04710 | 0.1256  | -0.1126 | -0.1281 | -0.398  | 0.0804  | -0.3306 | -0.1244 | -0.0948 | 0.0651  | 0.1626  | 0.025   | 0.0175  |
| PY02814 | 0.899   | 0.5603  | 0.6728  | 0.2575  | 0.7297  | 0.2022  | 0.1571  | -0.0904 | -0.1106 | 0.1285  | 0.0877  | -0.001  |
| PY01421 | -0.7296 | -0.1392 | -0.0056 | 0.0318  | 0.2205  | 0.0108  | -0.0908 | 0.3678  | 0.1337  | 0.4467  | 0.599   | -0.154  |
| PY02324 | 0.0482  | 0.116   | 0.1485  | 0.0248  | -0.3132 | -0.0977 | -0.0341 | -0.0141 | -0.4886 | -0.2625 | 0.0411  | -0.3078 |
| PY05367 | -1.1807 | -0.6842 | -0.4953 | -0.0243 | 0.418   | 0.2228  | -0.0847 | 0.0182  | -0.2312 | 0.0697  | 0.1482  | -0.1263 |
| PY01745 | -0.5008 | -0.0596 | 0.0426  | -0.1368 | 0.2277  | -0.0947 | -0.2066 | -0.2313 | -0.2014 | -0.0626 | -0.1165 | -0.3042 |
| PY00724 | 0.1825  | -0.1451 | -0.082  | 0.5632  | 0.1719  | 0.4035  | -0.1361 | -0.124  | -0.3064 | 0.2059  | -0.1188 | -0.0443 |
| PY03563 | -1.1934 | -0.6421 | -0.3063 | 0.5882  | 0.0628  | -0.3419 | -0.269  | 0.0597  | 0.0146  | 0.0414  | 0.8042  | 0.3944  |
| PY02253 | 0.064   | 0.251   | 0.2213  | 0.3042  | -0.1002 | 0.0957  | -0.1276 | 0.2042  | 0.124   | 0.1973  | 0.2016  | -0.1146 |
| PY01387 | -0.0721 | -0.1455 | -0.389  | -0.8248 | -0.2186 | -0.5801 | -0.225  | -0.841  | -0.4572 | -0.7607 | -0.5451 | -0.4151 |
| PY00398 | 0.2911  | 0.0181  | 0.2518  | -0.4288 | 0.1156  | 0.1243  | 0.0111  | -0.425  | -0.3959 | -0.4254 | -0.4066 | 0.0164  |
| PY00864 | -1.0594 | -0.3023 | -0.063  | -0.6334 | -0.179  | -0.0275 | -0.0647 | 0.1914  | -0.083  | -0.0337 | 0.5522  | 0.0574  |
| PY02098 | -0.5521 | -0.2988 | 0.0793  | 0.0229  | 0.6061  | 0.3875  | 0.0617  | 0.1142  | 0.0012  | -0.0364 | 0.5557  | -0.4797 |
| PY01989 | 0.489   | 0.2298  | 0.3746  | -0.0119 | -0.0127 | 0.0015  | 0.0797  | -0.4063 | -0.1649 | -0.3124 | -0.6064 | -0.0119 |
| PY00188 | 0.3239  | 0.1902  | -0.3165 | 1.0727  | 0.3772  | -0.008  | -0.1925 | -0.5158 | -0.0355 | -0.4472 | -0.3434 | -0.5588 |
| PY03028 | -0.6155 | -0.2645 | -0.0238 | -0.5779 | -0.3449 | 0.1395  | 0.2164  | -0.0614 | 0.2522  | -0.1255 | -0.2993 | 0.0495  |
| PY03676 | 0.1491  | 0.128   | 0.2274  | -0.7213 | -0.3879 | -0.5718 | -0.3014 | -0.4813 | -0.3075 | -0.3701 | -0.3369 | -0.3864 |
| PY00512 | 0.4004  | -0.0322 | -0.2465 | 0.2695  | 0.4189  | -0.0908 | -0.0974 | 0.0243  | -0.2665 | 0.6561  | 0.2427  | 0.0434  |
| PY05176 | 0.4774  | 0.1635  | 0.2292  | 0.148   | 0.1005  | -0.0462 | 0.0598  | -0.0271 | -0.0105 | -0.5656 | -0.1271 | 0.0367  |
| PY00765 | -0.4484 | -0.0346 | 0.351   | 0.4644  | 0.1323  | 0.1364  | 0.3198  | 0.1986  | 0.3122  | 0.3052  | 0.0997  | 0.0556  |
| PY04691 | 0.3485  | 0.1424  | 0.3731  | -1.0205 | -0.2796 | 0.586   | 0.6606  | -0.2422 | 0.3385  | -0.5481 | -0.3284 | 0.2061  |
| PY04493 | 0.2788  | 0.1385  | 0.3529  | -0.4648 | -0.3022 | -0.3092 | 0.0384  | -0.5175 | 0.132   | -0.7566 | -0.2386 | 0.0919  |

|         |         |         |         |         |         |         |         |         |         |         |         |         |
|---------|---------|---------|---------|---------|---------|---------|---------|---------|---------|---------|---------|---------|
| PY07455 | -0.6519 | -0.1563 | 0.0559  | 0.1729  | 0.1312  | 0.3109  | 0.0673  | 0.2676  | 0.1631  | 0.0493  | 0.3174  | -0.5691 |
| PY03138 | 0.5422  | 0.7779  | 0.7177  | 0.345   | -0.5341 | 0.0567  | 0.4742  | -0.2294 | 0.1927  | 0.0686  | -0.4304 | 0.1116  |
| PY00210 | 0.6783  | 0.0847  | -0.116  | 0.7275  | 0.166   | 0.0768  | 0.036   | -0.0948 | -0.0374 | 0.3389  | -0.4016 | 0.1143  |
| PY00415 | -0.7411 | -0.9739 | -0.5445 | 0.6578  | 0.108   | 0.1361  | -0.0786 | 0.4955  | -0.0611 | 0.4994  | 0.0444  | -0.2586 |
| PY06692 | -0.3922 | -0.1354 | 0.1833  | -0.5829 | -0.3522 | -0.1091 | 0.2644  | 0.0377  | 0.3658  | 0.1702  | 0.1086  | 0.3064  |
| PY05693 | -0.4754 | -0.025  | 0.1299  | 0.3456  | 0.039   | 0.1117  | 0.0929  | -0.1149 | 0.0021  | 0.1634  | -0.1103 | 0.1831  |
| PY07334 | -0.1432 | -0.081  | -0.2584 | 0.1905  | -0.4258 | -0.0118 | -0.1469 | -0.0514 | -0.0362 | -0.0533 | -0.2086 | 0.0015  |
| PY04902 | 0.639   | 0.2118  | 0.4118  | 0.4228  | 0.1764  | 0.0443  | 0.0816  | 0.1173  | -0.0066 | 0.3826  | 0.0344  | 0.1505  |
| PY05738 | -0.036  | 0.079   | 0.2923  | -0.2978 | -0.3249 | 0.1107  | 0.3215  | 0.2441  | 0.6299  | -0.0975 | -0.1641 | 0.0964  |
| PY06111 | -0.2699 | 0.0455  | 0.1536  | 0.2833  | 0.6998  | 0.2297  | 0.0109  | -0.1507 | -0.2622 | -0.176  | -0.3057 | -0.3857 |
| PY01648 | 0.0241  | -0.1488 | -0.6651 | 0.7684  | 0.9556  | 0.2801  | -0.2231 | 0.1774  | -0.2599 | 0.3852  | 0.5224  | 0.2116  |
| PY04775 | -0.5474 | -0.2381 | -0.5111 | -0.0685 | -0.0024 | -0.0952 | -0.1662 | 0.3324  | 0.0749  | 0.0998  | 0.1512  | 0.0294  |
| PY04781 | 0.7176  | 0.3353  | -0.1359 | 0.7984  | 0.7343  | 0.223   | -0.1004 | -0.0787 | -0.094  | 0.5069  | 0.3364  | -0.1    |
| PY03281 | -0.2388 | -0.1469 | -0.6871 | 0.0446  | 0.2655  | 0.0315  | 0.0397  | 0.1296  | -0.4481 | -0.0346 | 0.0403  | -0.2992 |
| PY03754 | 1.0047  | 0.6582  | 0.9345  | 0.2046  | -0.3009 | 0.3448  | 0.8242  | -0.2724 | 0.2909  | -0.0859 | -0.7182 | 0.5172  |
| PY04076 | -1.2758 | -0.4456 | -0.1652 | -0.2616 | 0.6893  | 0.334   | 0.0228  | 0.2324  | -0.0602 | 0.1487  | 0.5836  | -0.1649 |
| PY01335 | 0.4991  | 0.0089  | -0.4137 | 0.0637  | 0.4161  | -0.0436 | 0.0294  | 0.0336  | -0.3038 | -0.0923 | 0.0526  | -0.1997 |
| PY07453 | -0.2906 | -0.0935 | -0.1661 | 0.4736  | 0.398   | -0.0234 | -0.1194 | 0.2833  | -0.025  | 0.3488  | 0.613   | 0.1953  |
| PY04405 | -0.4418 | 0.0486  | -0.2233 | 1.9081  | 0.9799  | 1.1267  | -0.125  | 0.7958  | 0.1346  | 1.3617  | 1.1215  | -0.1833 |
| PY04324 | 0.672   | 0.4361  | 0.2315  | 0.1371  | -0.2938 | -0.2109 | 0.0256  | -0.2968 | 0.1814  | -0.2038 | -0.3919 | 0.3054  |
| PY06521 | 0.2285  | -0.0513 | 0.0304  | 0.5119  | 0.8257  | 0.2766  | -0.2147 | -0.2822 | -0.506  | -0.1761 | -0.2642 | -0.3191 |
| PY02966 | -0.0812 | 0.0746  | 0.5146  | 0.3111  | -0.0043 | 0.0527  | 0.2983  | 0.0648  | 0.1794  | 0.2473  | 0.0311  | 0.3864  |
| PY06531 | -1.0038 | -0.7014 | -0.2694 | -0.8968 | -0.1987 | 0.2269  | 0.1613  | 0.4735  | 0.4286  | 0.0462  | 0.1536  | 0.1061  |
| PY02903 | -0.3673 | 0.0433  | 0.0544  | -0.2116 | -0.2334 | -0.0057 | -0.1267 | -0.3795 | -0.0182 | -1.0008 | -0.0552 | -0.2948 |
| PY07613 | 1.5055  | -0.3231 | -0.1778 | -0.1469 | 1.0255  | -0.2171 | 0.0123  | -0.5339 | -0.6977 | 0.1726  | -0.2046 | 0.2477  |
| PY04927 | -0.8034 | -0.3451 | -0.6116 | -0.3832 | -0.5856 | -0.0625 | 0.4894  | 0.6339  | 0.5392  | 0.7778  | 0.7226  | 0.6775  |
| PY02373 | -0.1987 | 0.118   | 0.2278  | 0.0213  | -0.1693 | 0.1386  | 0.2186  | 0.1247  | 0.1457  | 0.2202  | -0.0763 | 0.2218  |
| PY02789 | 0.2268  | 0.252   | 0.1783  | -0.5137 | -0.2032 | 0.2088  | 0.3966  | -0.0507 | 0.0711  | -0.3762 | 0.0625  | 0.162   |
| PY03206 | -0.7253 | -0.0467 | 0.0384  | -0.3827 | -0.0433 | 0.4538  | 0.2819  | 0.0346  | -0.0817 | -0.6959 | -0.0245 | -0.3298 |
| PY06349 | 0.0928  | 0.1435  | 0.2001  | 0.0535  | -0.141  | -0.2045 | -0.1695 | -0.2519 | -0.0814 | -0.1061 | -0.116  | 0.0099  |
| PY03737 | -1.0043 | -0.6468 | -0.3161 | -0.4845 | -0.4302 | -0.661  | -0.4697 | 0.2111  | -0.1907 | 0.4098  | 0.5433  | 0.0905  |
| PY05034 | 0.242   | 0.0605  | 0.3403  | 1.4169  | -0.2982 | 0.2604  | 0.5503  | 0.0747  | 0.2505  | 0.0411  | -0.0058 | 0.625   |
| PY03237 | 0.1803  | 0.2303  | -0.0089 | 0.675   | 0.0905  | -0.003  | 0.1434  | 0.3863  | 0.1731  | 0.2784  | -0.0072 | 0.2472  |
| PY03368 | 0.2284  | -0.1541 | 0.2919  | 0.148   | 0.5254  | 0.0412  | -0.1866 | -0.2945 | 0.1676  | 0.2485  | 0.3587  | 0.248   |
| PY01350 | -0.0689 | -0.1788 | -0.2486 | -0.5307 | -0.1654 | -0.0253 | -0.1823 | 0.0479  | 0.4654  | -0.1416 | 0.1508  | -0.0391 |
| PY05681 | 0.2605  | 0.0645  | 0.0271  | 0.0198  | 0.2793  | 0.1164  | -0.1594 | -0.0246 | 0.1549  | -0.1819 | -0.0782 | -0.2383 |
| PY03894 | 0.6522  | 0.644   | 0.4117  | 0.2998  | -0.382  | -0.0695 | 0.1233  | 0.0042  | 0.2823  | -0.2183 | 0.2682  | 0.2038  |
| PY03606 | -0.5614 | -0.1052 | -0.0627 | -0.1042 | -0.1549 | -0.4449 | -0.217  | 0.3463  | 0.0583  | 0.2321  | 0.4576  | 0.0308  |
| PY02846 | 0.3764  | -0.0867 | -0.6909 | -0.0301 | 0.0451  | -0.2528 | -0.1962 | -0.0358 | -0.3957 | -0.0666 | -0.2449 | -0.0602 |
| PY01067 | -0.1988 | 0.0577  | -0.122  | 0.4859  | 0.2822  | -0.1019 | -0.1455 | 0.498   | 0.1619  | 0.5717  | 0.614   | 0.1488  |
| PY06778 | -0.2403 | -0.269  | -0.4044 | -0.2175 | -0.0781 | -0.3158 | -0.2594 | -0.0879 | -0.2779 | -0.0058 | 0.0344  | -0.0453 |
| PY02855 | 0.6986  | 0.4938  | 0.6565  | -0.0637 | -0.1662 | 0.1418  | 0.3842  | -0.3127 | -0.1772 | -0.8498 | -0.7488 | 0.0931  |
| PY05402 | 0.9431  | 0.5713  | 0.5692  | 0.1293  | -0.2677 | 0.0706  | 0.0856  | -0.5465 | -0.0025 | -0.4674 | -1.0159 | -0.0991 |
| PY02422 | -0.8417 | -0.4101 | -0.1323 | -0.7028 | -0.0928 | 0.0589  | -0.1507 | 0.1388  | -0.0132 | -0.181  | 0.344   | -0.3041 |
| PY00156 | 0.2636  | 0.5212  | 0.6903  | -0.2176 | -0.2445 | 0.0081  | 0.1973  | -0.1345 | -0.3279 | 0.0896  | -0.1973 | 0.0342  |
| PY03184 | 0.4478  | 0.2969  | 0.5343  | 0.0395  | -0.5354 | -0.2808 | 0.3612  | 0.2388  | 0.7318  | 0.0649  | -0.1855 | 0.022   |
| PY00524 | 0.3128  | 0.0758  | -0.0932 | 0.2625  | 0.4314  | 0.3526  | 0.0429  | 0.1113  | -0.2171 | 0.3135  | 0.1805  | -0.2958 |
| PY03594 | -0.3905 | 0.068   | 0.522   | 0.6497  | -0.1296 | 0.0364  | 0.5377  | 0.5224  | 0.7188  | 0.4947  | 0.3597  | 0.5378  |
| PY00609 | -0.5773 | -0.003  | -0.0603 | 0.5171  | -0.2615 | -0.1174 | -0.1367 | 0.2583  | 0.3504  | -0.3878 | 0.1647  | 0.5491  |
| PY01026 | 0.3352  | 0.1109  | -0.0835 | 0.0144  | -0.3031 | 0.1407  | 0.2609  | 0.3425  | 0.3068  | 0.4656  | 0.5847  | 0.3164  |
| PY04876 | -0.103  | -0.0417 | 0.066   | -0.0605 | -0.4142 | -0.231  | -0.2127 | -0.171  | 0.108   | -0.5947 | -0.3394 | -0.2469 |
| PY05474 | -0.6943 | -0.4152 | -0.7176 | 0.6546  | 0.4385  | -0.061  | -0.31   | 0.0473  | 0.0334  | 0.8613  | 0.7389  | 0.3646  |
| PY03551 | -0.0832 | -0.1565 | -0.2784 | 0.1053  | 0.8135  | 0.2598  | -0.3247 | 0.1421  | 0.2384  | 0.3327  | -0.0746 | 0.4854  |
| PY01108 | 0.5964  | 0.1803  | -0.0691 | 0.4074  | 0.1206  | -0.0469 | -0.1506 | -0.2047 | -0.2398 | -0.4127 | -0.2519 | -0.094  |
| PY02525 | -0.7625 | -0.1683 | 0.012   | -0.0268 | 0.299   | 0.105   | -0.1543 | -0.2394 | -0.0284 | 0.1048  | 0.4188  | -0.1719 |
| PY01368 | -0.2547 | -0.1507 | 0.1644  | 0.8245  | 0.2521  | 0.1417  | 0.1112  | 0.5948  | -0.1601 | 0.3015  | 0.2858  | -0.1901 |
| PY02061 | -0.5799 | -0.5075 | -0.5535 | 1.8409  | 0.5984  | 0.0247  | 0.0071  | 0.3806  | -0.0302 | 0.1373  | 0.4965  | 0.1946  |
| PY07280 | 0.1814  | 0.468   | 0.7038  | 0.2092  | -0.428  | 0.195   | 0.4156  | 0.035   | 0.1815  | -0.3437 | -0.4252 | -0.3054 |
| PY01280 | -0.0731 | -0.0999 | 0.0481  | -0.4545 | 0.1774  | -0.0372 | 0.1709  | -0.094  | 0.1163  | -0.1708 | 0.0649  | 0.1989  |
| PY02625 | -0.315  | -0.0498 | -0.221  | 0.24    | 0.9787  | 0.0184  | 0.0636  | 0.288   | 0.1162  | 0.2637  | 0.8713  | -0.1175 |
| PY01343 | 0.8541  | 0.428   | 0.8394  | 0.9025  | -0.156  | 0.0586  | 0.6037  | 0.1268  | 0.439   | 0.3438  | -0.3119 | 0.6737  |
| PY01021 | -0.0926 | -0.1153 | 0.1054  | 0.0338  | -0.0766 | -0.1475 | -0.0859 | 0.0937  | 0.0097  | 0.0038  | 0.1555  | -0.1679 |
| PY06015 | 0.0749  | -0.0096 | -0.4024 | -0.0339 | 0.0351  | 0.1123  | 0.0724  | -0.1419 | -0.233  | -0.0697 | -0.104  | 0.0282  |

|         |         |         |         |         |         |         |         |         |         |         |         |         |
|---------|---------|---------|---------|---------|---------|---------|---------|---------|---------|---------|---------|---------|
| PY05396 | -0.0182 | 0.6753  | -0.3997 | -0.78   | -0.0153 | 0.2188  | 0.6646  | 0.3715  | 0.41    | -0.4011 | 0.3656  | -0.6063 |
| PY06904 | 0.4617  | 0.431   | 0.6714  | -0.3458 | -0.0438 | 0.0351  | 0.304   | -0.341  | 0.1463  | -0.5991 | -0.4177 | 0.2626  |
| PY01327 | 0.2668  | 0.3746  | 0.774   | 0.1874  | -0.1641 | 0.2401  | 0.1546  | -0.1834 | -0.1054 | -0.2776 | -0.2335 | -0.0601 |
| PY05267 | -0.1202 | 0.0182  | -0.0951 | -0.1992 | 0.2803  | -0.2181 | -0.4969 | -0.0861 | 0.3585  | 0.0554  | 0.2018  | 0.4441  |
| PY05722 | -0.2554 | -0.1017 | 0.0768  | 0.0179  | 0.0935  | -0.3893 | -0.1819 | -0.0948 | 0.0948  | -0.0933 | 0.0899  | -0.0429 |
| PY02382 | -1.0229 | 0.1506  | 0.9101  | -0.4968 | -0.98   | -0.7084 | 0.0189  | -0.1619 | 0.3382  | 0.0402  | -0.0248 | 0.2145  |
| PY02666 | 0.3415  | 0.1085  | 0.3822  | -0.4941 | -0.196  | 0.012   | 0.1743  | 0.1426  | 0.1544  | -0.2103 | 0.0935  | 0.1376  |
| PY01551 | -1.0687 | -0.3147 | -0.2153 | -0.4895 | -0.2646 | 0       | 0.1406  | 0.2669  | 0.0504  | -0.5899 | 0.165   | -0.5258 |
| PY06175 | 0.3452  | 0.4676  | 0.2095  | -0.4502 | -0.3044 | 0.383   | -0.1863 | -0.1102 | -0.0852 | -0.2368 | -0.6939 | -0.0755 |
| PY04900 | -0.1292 | 0.2245  | -0.2766 | -0.4377 | 0.0677  | -0.1188 | 0.1414  | -0.1226 | 0.3432  | -0.5219 | -0.1636 | 0.4392  |
| PY05469 | -0.112  | -0.1092 | -0.303  | 0.1658  | 0.4223  | 0.3605  | 0.165   | 0.0697  | -0.1338 | -0.1013 | 0.1504  | 0.1367  |
| PY01684 | -0.2733 | -0.3072 | -0.4243 | -0.1735 | -0.2495 | -0.0137 | 0.1557  | -0.1607 | 0.1743  | -0.1465 | -0.5551 | 0.2113  |
| PY00674 | 0.6668  | 0.2565  | -0.0084 | 0.1281  | -0.0111 | 0.0839  | 0.2822  | 0.036   | 0.3849  | 0.2801  | -0.0756 | 0.5778  |
| PY04497 | 0.1309  | -0.1423 | -0.1563 | -0.4196 | -0.0106 | -0.1703 | -0.1561 | -0.3772 | -0.3187 | -0.2755 | -0.1834 | -0.6383 |
| PY00683 | 1.2258  | 0.4428  | -0.0004 | 0.31    | 0.0404  | -0.127  | -0.0793 | -0.4092 | -0.2047 | -0.8357 | -0.4613 | 0.1829  |
| PY04912 | -0.5858 | -0.1587 | -0.0157 | 0.3504  | -0.2416 | -0.1114 | -0.2004 | 0.2009  | -0.0574 | -0.1906 | 0.427   | -0.1098 |
| PY07156 | -0.2832 | -0.5033 | -0.5573 | 0.2267  | -0.2651 | -0.4521 | -0.2809 | -0.3679 | -0.1681 | -0.39   | -0.3052 | -0.1069 |
| PY00431 | 0.1601  | 0.0867  | 0.2237  | 0.1803  | 0.1831  | 0.0973  | 0.1242  | 0.3758  | 0.8281  | 0.7385  | -0.1982 | 0.3811  |
| PY01308 | -0.1367 | -0.2757 | -0.2384 | -0.1892 | 0.7073  | 0.118   | -0.302  | -0.0236 | -0.1607 | -0.0689 | -0.3283 | -0.0338 |
| PY00938 | -0.564  | -0.2091 | -0.501  | -0.0192 | -0.1049 | -0.3569 | -0.2494 | 0.0939  | -0.0821 | 0.3961  | 0.3785  | 0.1879  |
| PY04937 | -0.0352 | 0.0402  | 0.1278  | -0.2085 | -0.1672 | -0.0439 | 0.3038  | 0.1248  | 0.4207  | 0.1175  | 0.2121  | 0.3032  |
| PY07050 | 0.5143  | 0.1134  | 0.191   | 0.2471  | 0.1306  | 0.1349  | -0.1011 | -0.1801 | -0.0661 | 0.0089  | -0.5144 | -0.0421 |
| PY04031 | 0.539   | 0.1247  | 0.0475  | -0.0279 | -0.0616 | -0.1214 | -0.0281 | -0.1563 | -0.0438 | -0.4867 | -0.4622 | 0.0414  |
| PY01880 | 0.4022  | -0.301  | -0.3622 | -0.1445 | 1.1741  | 0.0724  | -0.0911 | -0.2041 | -0.4402 | -0.0492 | 0.6364  | 0.0053  |
| PY04582 | -0.2615 | 0.1583  | 0.3549  | -0.3943 | -0.2452 | -0.046  | 0.0006  | 0.1046  | 0.0358  | -0.0766 | 0.1674  | -0.41   |
| PY00896 | 0.3502  | 0.324   | 0.1433  | -0.0486 | -0.5514 | 0.2196  | 0.3891  | 0.2149  | 0.6601  | -0.2216 | -0.1567 | 0.564   |
| PY05634 | -0.1493 | -0.0512 | -0.1054 | 0.1194  | 0.3482  | 0.3179  | -0.1794 | -0.1183 | -0.0905 | -0.1828 | -0.2068 | -0.3146 |
| PY03462 | -0.0638 | -0.0376 | -0.2044 | -0.276  | 0.04    | -0.0331 | -0.0319 | -0.0944 | -0.2177 | -0.2266 | -0.1152 | 0.1582  |
| PY03396 | -0.0932 | -0.0451 | -0.1598 | 0.9948  | 0.6628  | 0.0208  | 0.1352  | 0.5936  | -0.0438 | 0.0908  | 1.0129  | 0.3136  |
| PY01071 | 0.8002  | 0.3036  | 0.1293  | -0.4202 | -0.15   | 0.0741  | 0.1771  | -0.2675 | 0.0579  | -0.1139 | -0.1906 | 0.2446  |
| PY05891 | 0.4589  | 0.0306  | -0.3769 | -0.1846 | -0.1728 | -0.3196 | -0.175  | -0.2939 | -0.0954 | 0.0666  | 0.1914  | -0.04   |
| PY01361 | 0.4863  | 0.1026  | -0.2522 | 0.5317  | 0.484   | -0.0327 | -0.082  | 0.0303  | -0.2764 | 0.1596  | 0.3053  | 0.0166  |
| PY06863 | -0.0278 | -0.2446 | -0.0082 | -0.4928 | -0.3441 | -0.076  | 0.1205  | -0.4284 | -1.1257 | -0.669  | -0.3841 | -0.7742 |
| PY04550 | 0.2693  | 0.1854  | 0.18    | -0.3706 | -0.0262 | -0.2125 | 0.0505  | -0.1358 | -0.1115 | 0.3502  | 0.4371  | 0.0976  |
| PY02849 | -0.5277 | -0.1731 | -0.2001 | -0.5084 | -0.0668 | -0.4907 | 0.084   | -0.0555 | -0.0425 | -0.4838 | -0.1764 | -0.0152 |
| PY04196 | 0.0174  | 0.1884  | 0.38    | -0.0476 | -0.2411 | 0.15    | 0.28    | -0.1246 | 0.0887  | -0.4227 | -0.5716 | 0.0724  |
| PY04065 | 0.6075  | 0.1258  | 0.0686  | 0.0338  | -0.1146 | 0.0388  | 0.0402  | -0.1397 | 0.2034  | 0.0614  | -0.5081 | 0.4083  |
| PY07283 | -0.6489 | -0.4959 | -0.0799 | -0.4277 | 0.1756  | 0.1747  | 0.3404  | 0.3985  | 0.2983  | -0.0307 | 0.2949  | -0.3334 |
| PY02174 | -0.0244 | -0.2388 | -0.1298 | 0.8706  | 0.8961  | 0.5057  | -0.1302 | 0.1073  | -0.1616 | 0.4806  | 0.9126  | 0.1617  |
| PY06298 | 0.3038  | -0.0576 | 0.0494  | -0.2154 | 0.0701  | 0.0053  | -0.0793 | -0.0541 | -0.0903 | -0.0563 | -0.2789 | -0.0377 |
| PY00181 | -0.2894 | -0.3424 | -0.2425 | 0.7771  | 0.5975  | -0.2892 | -0.4523 | -0.0318 | 0.0339  | 0.6792  | 0.7169  | 0.0505  |
| PY01944 | 0.2232  | -0.2447 | -0.0474 | 0.1313  | 0.2894  | 0.2573  | -0.1185 | -0.2    | -0.6904 | -0.0451 | -0.074  | -0.0128 |
| PY06352 | 0.418   | 0.1849  | -0.009  | -0.0276 | -0.1198 | 0.0626  | -0.0724 | -0.5708 | -0.1992 | -0.0768 | -0.3158 | 0.3756  |
| PY02332 | -0.5658 | -0.2668 | -0.1481 | -0.2544 | -0.2519 | -0.0356 | 0.2622  | 0.4334  | 0.0052  | -0.4493 | 0.176   | -0.7143 |
| PY01507 | -0.3172 | -0.0629 | -0.0762 | 0.3094  | 0.1552  | -0.1871 | -0.2539 | -0.5248 | -0.2565 | -0.1333 | -0.6035 | -0.3873 |
| PY06261 | -0.9162 | -0.4074 | 0.2153  | 0.1982  | -0.5519 | -0.0064 | -0.1579 | 0.3052  | 0.5421  | 0.1573  | 0.1097  | -0.0577 |
| PY05588 | -0.8713 | -0.0546 | 0.3547  | -0.5741 | -1.3239 | -0.3036 | -0.2197 | 0.1159  | 0.1074  | -0.1328 | 0.4479  | -0.2597 |
| PY03519 | 0.3029  | 0.0944  | 0.0492  | -0.1224 | -0.0873 | -0.1546 | 0.1767  | -0.269  | 0.1214  | -0.2614 | -0.3022 | 0.0204  |
| PY06462 | 0.0354  | -0.2159 | -0.2692 | -0.2413 | 0.1704  | 0.0783  | -0.2008 | -0.1197 | 0.0479  | -0.1406 | -0.2462 | 0.0004  |
| PY07268 | 0.0744  | 0.1586  | 0.8371  | 0.5757  | -0.087  | -0.1263 | -0.1385 | -0.3036 | 0.2293  | -0.2029 | -0.2745 | 0.1451  |
| PY01624 | 0.0336  | -0.2027 | -0.602  | -0.191  | -0.2121 | -0.0081 | -0.3487 | 0.0423  | 0.0267  | -0.2584 | -0.1517 | 0.3537  |
| PY03265 | -0.1869 | -0.0283 | 0.2799  | -0.2117 | -0.0329 | 0.1584  | 0.3638  | -0.0924 | 0.1186  | -0.2214 | -0.1221 | 0.3283  |
| PY01265 | 0.2234  | 0.0085  | -0.0948 | 0.5     | -0.0245 | -0.0117 | 0.1283  | 0.2151  | -0.0106 | 0.1099  | 0.0518  | 0.2719  |
| PY03507 | 0.5409  | 0.0851  | 0.2749  | 0.6001  | -0.0781 | 0.2022  | 0.0221  | -0.0556 | -0.2339 | -0.312  | -0.5659 | -0.4455 |
| PY02574 | 0.677   | 0.1094  | 0.2357  | -0.5744 | 0.0152  | -0.0621 | 0.1928  | -0.4415 | -0.0975 | -0.456  | -0.5899 | 0.2284  |
| PY06775 | 0.3775  | 0.1641  | 0.0382  | -0.2797 | 0.1354  | -0.3177 | -0.1892 | -0.1769 | 0.1064  | -0.027  | -0.1827 | 0.0804  |
| PY03929 | 0.4255  | 0.0459  | -0.1244 | 0.2569  | 0.666   | 0.0041  | -0.1291 | -0.1351 | -0.4132 | 0.0782  | 0.3207  | 0.0423  |
| PY04797 | 1.2033  | 0.47    | 0.386   | 0.7216  | 0.2112  | -0.2773 | -0.1291 | 0.0588  | -0.213  | -0.5456 | 0.012   | -0.0783 |
| PY01168 | 0.0665  | -0.5883 | -0.5843 | 0.5122  | 0.7485  | 0.137   | -0.3024 | 0.093   | -0.0894 | 0.6611  | 0.2146  | 0.1279  |
| PY05711 | -0.6505 | -0.0042 | 0.2945  | -0.1623 | 0.1139  | 0.2437  | 0.1306  | 0.0278  | -0.1249 | 0.1554  | -0.0182 | 0.2442  |
| PY05981 | 0.9819  | 0.7078  | 0.7703  | 0.4129  | -0.2833 | 0.082   | 0.262   | 0.0456  | 0.3676  | -0.5172 | -0.6012 | -0.6292 |
| PY01105 | -0.045  | 0       | -0.3979 | -0.509  | -0.0233 | -0.3594 | -0.4249 | -0.0161 | 0.0465  | -0.2115 | 0.1345  | -0.3278 |
| PY03587 | 1.0537  | 0.256   | 0.415   | 0.0831  | -0.5347 | -0.3234 | 0.1066  | -0.2818 | 0.0005  | -0.2508 | -0.8404 | 0.3121  |

|         |         |         |         |         |         |         |         |         |         |         |         |         |
|---------|---------|---------|---------|---------|---------|---------|---------|---------|---------|---------|---------|---------|
| PY07000 | -0.3577 | 0.2946  | 0.6075  | 0.4868  | 0.1092  | 0.226   | 0.393   | 0.1705  | 0.3386  | 0.2538  | 0.4984  | 0.1945  |
| PY06278 | 0.0484  | -0.0981 | -0.0467 | -0.3113 | 0.1304  | 0.2638  | 0.1555  | -0.298  | -0.35   | -0.2877 | -0.2892 | 0.0531  |
| PY05597 | -0.2485 | -0.2192 | -0.2486 | -0.1539 | 0.2926  | 0.1584  | -0.0427 | -0.2055 | -0.1681 | -0.1998 | 0.5436  | -0.0167 |
| PY02743 | -0.9927 | 0.0085  | 0.3072  | -0.4652 | -0.4084 | -0.452  | -0.0179 | 0.0706  | 0.4568  | -0.2    | 0.7159  | -0.1244 |
| PY02103 | 0.0743  | -0.1585 | 0.36    | 0.3273  | 0.1647  | 0.0737  | 0.3252  | 0.317   | -0.1753 | 0.3869  | -0.0487 | 0.5052  |
| PY02832 | 0.2082  | 0.131   | -0.0216 | -0.4745 | 0.1096  | 0.0408  | 0.0155  | -0.0767 | -0.1073 | -0.3065 | -0.0931 | 0.0555  |
| PY00569 | -0.1613 | -0.2618 | -0.2927 | 0.3746  | 0.1956  | -0.3732 | 0.0915  | 0.2079  | 0.289   | 0.1941  | 0.3976  | 0.2606  |
| PY00573 | 0.5498  | 0.3572  | 0.686   | 0.9092  | 0.5498  | 0.5296  | 0.1145  | 0.6561  | 0.0895  | -0.5518 | 0.5693  | 0.2264  |
| PY03401 | -0.3826 | -0.6133 | -0.5198 | -0.5626 | 0.0156  | -0.4735 | -0.2011 | 0.151   | 0.2479  | 0.0224  | 0.0393  | 0.0184  |
| PY02648 | -0.5975 | -0.0054 | 0.3776  | 1.1211  | 0.3575  | 0.3266  | 0.004   | 0.2012  | 0.1912  | 0.3108  | 0.9032  | -0.1664 |
| PY02741 | 0.5034  | 0.1223  | 0.1729  | 0.2904  | -0.2377 | 0.0021  | -0.0307 | -0.0795 | -0.0163 | 0.2628  | -0.2038 | 0.0873  |
| PY05615 | -0.8042 | -0.1539 | -0.1251 | -0.5843 | -0.0769 | 0.0953  | -0.0283 | 0.071   | -0.4348 | -0.0548 | 0.1969  | 0.0357  |
| PY07133 | -0.0441 | -0.1746 | -0.0243 | 0.3761  | -0.2486 | 0.0204  | -0.1214 | 0.0365  | 0.0428  | 0.1002  | 0.2812  | -0.0135 |
| PY04025 | -0.3615 | -0.0841 | -0.3471 | -0.129  | -0.6563 | -0.067  | -0.1154 | -0.0155 | 0.3307  | -0.1427 | -0.0037 | 0.2662  |
| PY04843 | -0.2234 | -0.5503 | -0.5328 | -0.3839 | -0.0898 | -0.2934 | 0.0173  | 0.3231  | 0.1165  | 0.9941  | 1.4446  | 0.6349  |
| PY01921 | -0.0643 | 0.0896  | -0.5037 | 0.264   | 0.5597  | 0.0938  | 0.0032  | 0.2134  | -0.0369 | -0.075  | 0.3374  | -0.2908 |
| PY00547 | 0.2306  | 0.1347  | 0.3381  | 0.5164  | 0.1295  | 0.3001  | 0.4109  | -0.058  | 0.1012  | 0.1226  | 0.1048  | 0.0916  |
| PY00714 | -0.0083 | 0.0451  | 0.2092  | -0.4943 | -0.0105 | 0.1738  | 0.0265  | -0.177  | 0.1288  | -0.5119 | -0.268  | 0.0728  |
| PY01011 | -0.5861 | -0.0148 | 0.0341  | -0.2883 | -0.1053 | 0.0061  | -0.1094 | 0.1331  | 0.2587  | 0.2895  | 0.2731  | 0.1342  |
| PY02908 | -1.0036 | -0.1792 | -0.6597 | -0.3904 | -0.3022 | -0.2703 | 0.2527  | 0.7307  | 0.8185  | 1.0034  | 0.9422  | 0.1951  |
| PY05575 | -0.7065 | 0.0116  | -0.4433 | -0.6038 | -0.4129 | 0.0901  | -0.1004 | 0.1801  | 0.1949  | 0.1297  | -0.1909 | -0.112  |
| PY01301 | 0.8962  | 0.5842  | 0.1987  | 0.0708  | -0.0405 | -0.1811 | 0.1181  | -0.2282 | -0.0593 | -0.1049 | -0.1784 | -0.2217 |
| PY05186 | 0.5203  | 0.5095  | 0.0395  | -0.1633 | -0.2821 | 0.0078  | 0.6453  | 0.1948  | 0.3663  | 0.1001  | 0.8383  | 0.5101  |
| PY01875 | -0.5569 | -0.3557 | -0.1008 | 0.1008  | 0.1514  | 0.33    | -0.5022 | 0.1927  | 0.1715  | 0.1654  | 0.0643  | -0.0807 |
| PY04681 | 0.4692  | 0.2572  | 0.0804  | 0.0371  | 0.1813  | -0.2926 | -0.2792 | -0.0454 | 0.0835  | 0.1604  | -0.1235 | -0.1934 |
| PY07249 | -0.5172 | -0.2021 | 0.0247  | -0.0288 | -0.2565 | -0.2406 | -0.2027 | 0.0376  | 0.0305  | 0.176   | 0.0138  | 0.0952  |
| PY05366 | -0.911  | -0.2415 | 0.1716  | 0.4172  | -0.0871 | 0.3902  | 0.2338  | 0.2942  | 0.3074  | 0.5797  | 0.4892  | 0.2592  |
| PY06913 | 0.1664  | 0.0566  | 0.0252  | 0.8921  | 0.2541  | -0.0266 | 0.0602  | 0.0956  | -1.3293 | 0.9075  | 0.104   | -0.3681 |
| PY01514 | -0.4629 | -0.2861 | -0.5737 | -0.1615 | 0.1578  | 0.1365  | 0.1271  | 0.3283  | 0.092   | 0.2919  | 0.3233  | 0.2705  |
| PY03788 | -0.1243 | -0.1209 | -0.3135 | 0.7261  | 0.6     | 0.1789  | 0.1591  | 0.3231  | 0.3182  | 0.5618  | 0.9352  | 0.2654  |
| PY05953 | -0.1899 | 0.1304  | 0.1109  | -0.2692 | 0.3418  | -0.0598 | -0.071  | -0.1468 | -0.0419 | -0.067  | -0.0002 | 0.1082  |
| PY00479 | -0.4899 | -0.3297 | 0.0417  | -0.1985 | 0.0209  | 0.1036  | -0.0296 | -0.2773 | 0.0138  | -0.1357 | 0.0069  | 0.0539  |
| PY05994 | 0.5742  | 0.3688  | 0.2629  | -0.3786 | -0.1625 | -0.0902 | -0.0104 | -0.301  | -0.2263 | 0.3012  | -0.1186 | 0.2256  |
| PY00562 | -0.5715 | -0.1963 | 0.047   | 0.301   | 0.1236  | 0.3138  | -0.0139 | 0.1231  | -0.5305 | 0.551   | 0.4463  | -0.6443 |
| PY06274 | -0.1215 | 0.0128  | -0.304  | 0.1316  | 0.1853  | 0.1282  | 0.2016  | 0.0435  | 0.0758  | 0.3497  | -0.0439 | -0.3031 |
| PY01028 | 0.265   | -0.0472 | -0.3256 | 0.2577  | -0.0686 | -0.0952 | -0.0436 | 0.2987  | 0.2178  | 0.1567  | 0.1328  | 0.2666  |
| PY01822 | -0.9128 | -0.0998 | 0.0711  | -0.1555 | -0.4408 | -0.1059 | -0.1809 | 0.1918  | 0.1692  | 0.0815  | 0.111   | -0.1381 |
| PY07302 | 0.2467  | 0.0651  | 0.215   | 0.0375  | -0.3196 | -0.1627 | -0.1531 | -0.3883 | -0.1856 | -0.8743 | -0.594  | -0.1285 |
| PY01287 | -0.6049 | -0.1659 | -0.088  | 0.1542  | -0.2491 | 0.0346  | 0.0657  | -0.0036 | 0.0026  | -0.1301 | -0.1138 | 0.2591  |
| PY05951 | 0.91    | 0.438   | 0.2111  | -0.084  | -0.31   | -0.0718 | 0.1901  | -0.1215 | 0.0383  | -0.1769 | -0.5606 | 0.1441  |
| PY04042 | 0.0468  | -0.4271 | -0.1376 | -0.0481 | 0.0852  | 0.2454  | 0.2331  | 0.2217  | 0.1305  | 0.0396  | 0.0331  | 0.1967  |
| PY01290 | 0.1227  | -0.0552 | 0.2     | -0.4393 | -0.3148 | -0.0322 | 0.1287  | -0.0378 | 0.086   | -0.3362 | -0.3587 | 0.1164  |
| PY01566 | -0.6774 | -0.3739 | -0.8331 | 0.2374  | 0.3758  | 0.1925  | 0.0299  | 0.4575  | 0.1522  | 0.3772  | 0.5254  | 0.2167  |
| PY01060 | 0.0586  | 0.0692  | 0.1431  | 0.1558  | 0.1285  | 0.022   | 0.1215  | 0.1511  | -0.2584 | -0.197  | -0.0797 | 0.1002  |
| PY00496 | -0.7149 | -0.4888 | -1.1747 | -0.7295 | 0.4248  | 0.2254  | 0.581   | 0.7671  | 0.4356  | 0.3191  | -0.5295 | 0       |
| PY02078 | -0.1895 | 0.7012  | 0.3187  | -0.2762 | -0.3902 | -0.0255 | -0.0086 | 0.2123  | -0.0687 | -0.1585 | -0.0714 | -0.1981 |
| PY07669 | 0.9591  | -0.1746 | -0.3971 | 0.535   | 0.8942  | -0.6636 | -0.2924 | -0.1981 | -0.5917 | 0.0749  | -0.401  | 0.4286  |
| PY05058 | -0.1661 | -0.1123 | -0.5443 | -0.7824 | -0.5699 | -0.6184 | -0.4504 | -0.1915 | -0.1454 | -1.3469 | -0.0874 | -0.0223 |
| PY00532 | -0.0692 | 0.18    | 0.3361  | 0.3347  | 0.0304  | 0.255   | 0.3779  | -0.1363 | 0.1112  | 0.0797  | -0.1083 | 0.001   |
| PY05196 | 0.4566  | 0.0993  | -0.4427 | -0.2187 | 0.6655  | 0.004   | 0.0552  | 0.0256  | -0.1241 | -0.2287 | -0.053  | -0.4395 |
| PY04362 | 0.4844  | 0.2389  | 0.5152  | -0.102  | -0.1554 | 0.0702  | -0.0632 | -0.2509 | 0.0246  | -0.0446 | -0.4854 | 0.0826  |
| PY02234 | 0.7597  | 0.357   | 0.1832  | -0.3563 | -0.0901 | -0.044  | 0.5513  | -0.2898 | 0.053   | 0.0394  | -0.3017 | 0.3682  |
| PY01477 | 0.2369  | -0.0178 | -0.3218 | 0.6711  | 0.2103  | 0.0746  | 0.0307  | -0.0456 | -0.2415 | 0.3426  | -0.3677 | 0.3249  |
| PY01478 | 0.1616  | 0.2106  | 0.1395  | 0.2893  | 0.3438  | 0.0868  | 0.3197  | -0.0841 | 0.3312  | 0.1371  | 0.2215  | 0.3884  |
| PY00364 | -0.29   | -0.3168 | -0.5048 | 0.3198  | -0.3989 | -0.5667 | -0.2156 | 0.6019  | -0.4174 | 0.265   | 0.2385  | -0.4402 |
| PY00336 | -0.0916 | 0.0503  | 0.19    | 0.0414  | 0.1923  | 0.4568  | 0.2058  | -0.0128 | -0.0985 | -0.3614 | -0.5777 | -0.282  |
| PY03877 | -0.6597 | -0.3185 | -0.1999 | 0.6481  | -0.444  | -0.0156 | -0.0252 | 0.164   | 0.0822  | -0.1241 | 0.341   | -0.1368 |
| PY03409 | 0.1181  | -0.2221 | -0.2962 | 0.0355  | 0.9463  | 0.3279  | 0.0337  | -0.2048 | -0.087  | -0.2681 | -0.6971 | -0.084  |
| PY00626 | -0.2498 | -0.1685 | -0.2519 | 0.9159  | 0.8249  | 0.3082  | 0.0848  | 0.1179  | -0.6423 | 0.696   | 0.5894  | 0.4119  |
| PY03456 | -0.154  | -0.2881 | -0.2761 | 0.2799  | -0.1572 | 0.2414  | -0.5716 | 0.4262  | 0.2322  | 0.3179  | 0.3821  | 0.1962  |
| PY03243 | -0.2467 | -0.1231 | 0.126   | 0.3599  | 0.2612  | 0.1757  | -0.2437 | 0.2005  | 0.0592  | 0.826   | 0.2319  | 0.1955  |
| PY02327 | 0.1561  | 0.1661  | 0.1637  | -0.118  | -0.0967 | -0.3127 | 0.3848  | 0.6453  | 0.7384  | -0.3484 | -0.0873 | 0.939   |
| PY01643 | -0.4199 | -0.223  | -0.2329 | -0.2814 | 0.2275  | 0.1961  | 0.0367  | -0.0023 | -0.1716 | -0.0796 | -0.058  | -0.0721 |

|         |         |         |         |         |         |         |         |         |         |         |         |         |
|---------|---------|---------|---------|---------|---------|---------|---------|---------|---------|---------|---------|---------|
| PY06583 | 0.1245  | -0.3338 | -0.5438 | -0.2847 | -0.6045 | -0.6466 | 0.0458  | -0.0333 | 0.2961  | 0.5449  | 0.1652  | 0.8509  |
| PY03571 | 0.2137  | 0.2362  | 0.1136  | -0.6731 | -0.0948 | 0.3104  | 0.1158  | -0.2995 | 0.0172  | 0.0101  | -0.454  | 0.0883  |
| PY04767 | -0.1209 | -0.0582 | -0.2704 | 0.4118  | 0.6278  | 0.1448  | -0.0022 | 0.0493  | 0.0736  | 0.549   | 0.4676  | 0.3323  |
| PY05393 | 0.649   | 0.1209  | -0.662  | -0.0967 | -0.3529 | -0.0566 | -0.235  | -0.1911 | -0.0197 | 0.1995  | -0.291  | -0.1324 |
| PY00670 | 0.1518  | -0.0175 | 0.2048  | 0.8304  | 0.1125  | 0.0788  | -0.1437 | 0.1385  | -0.1707 | 0.3853  | -0.4898 | -0.0494 |
| PY05144 | 0.8205  | 0.1202  | 0.3807  | -0.0215 | -0.1143 | 0.2852  | 0.4381  | -0.203  | 0.4156  | 0.2311  | -0.2993 | 0.3415  |
| PY01488 | 0.3063  | 0.3462  | 0.6281  | -0.1302 | -0.3787 | 0.2698  | -0.0226 | -0.3912 | -0.1059 | -0.4988 | -0.5197 | -0.2735 |
| PY04969 | 0.8017  | -0.0335 | 0.1966  | -0.1575 | -0.1439 | 0.0119  | 0.2748  | -0.4821 | 0.1259  | -0.2189 | -0.6665 | 0.1302  |
| PY04481 | -0.4495 | -0.539  | -0.7213 | -0.136  | 0.1524  | -0.2491 | -0.4606 | 0.0014  | -0.0464 | 0.192   | 0.2926  | 0.0227  |
| PY01842 | 0.49    | 0.0442  | -0.1588 | 0.142   | 0.0963  | -0.1015 | -0.0768 | 0.0477  | 0.0236  | 0.156   | -0.3175 | -0.4232 |
| PY00031 | 0.6824  | -0.5423 | 0.1895  | -0.1353 | -0.2163 | -0.197  | -0.0453 | -0.1564 | -0.4856 | 0.2431  | -0.0626 | -0.363  |
| PY01345 | 0.6035  | 0.4545  | 0.074   | 0.051   | 0.1203  | 0.2198  | 0.1946  | 0.2548  | 0.2851  | 0.0433  | -0.175  | 0.1983  |
| PY04450 | 0.4095  | 0.1477  | 0.3743  | 0.195   | -0.1298 | 0.4637  | 0.5362  | 0.5579  | 0.5617  | 0.4168  | -0.428  | 0.0704  |
| PY05175 | -0.1685 | -0.174  | -0.6156 | 0.3619  | 0.114   | 0.2666  | 0.0531  | 0.6732  | 0.0675  | -1.1409 | 0.1835  | -0.1547 |
| PY02048 | 0.5349  | 0.2413  | 0.3529  | 0.2063  | 0.236   | 0.0628  | 0.3211  | 0.0026  | 0.0311  | -0.0456 | 0.1898  | 0.1859  |
| PY07661 | 0.1052  | -0.0162 | 0.4237  | -0.2091 | -0.3812 | 0.2555  | 0.2862  | 0.2205  | 0.105   | -0.2755 | -0.5711 | -0.2782 |
| PY05629 | -0.4946 | -0.2091 | -0.0994 | 0.0064  | 0.1324  | -0.0688 | 0.1451  | 0.1014  | 0.0114  | 0.0326  | 0.2116  | -0.2225 |
| PY07174 | -0.6912 | -0.0647 | 0.253   | -0.5558 | -0.0174 | -0.1556 | -0.1295 | -0.1153 | -0.2302 | -0.1823 | 0.2642  | -0.0454 |
| PY00060 | -0.2816 | -0.5393 | -1.1049 | 0.3602  | 0.2039  | -0.454  | 0.0154  | 0.0377  | 0.0373  | 0.2982  | -0.2977 | 0.7004  |
| PY05710 | 0.1013  | -0.1484 | -0.4527 | -0.2371 | -0.1643 | -0.0413 | -0.263  | -0.086  | -0.049  | 0.0187  | -0.0605 | -0.0939 |
| PY07001 | -0.0937 | 0.1494  | 0.0687  | 0.033   | 0.0776  | -0.0183 | 0.0385  | 0.0284  | 0.1246  | -0.1857 | 0.1816  | -0.3855 |
| PY01349 | 0.6295  | 0.4897  | 0.7315  | 0.076   | 0.0978  | 0.2129  | 0.502   | 0.1999  | 0.2012  | 0.0037  | 0.1073  | 0.2213  |
| PY03317 | -0.2439 | 0.2129  | 0.1579  | -0.0057 | 0.0099  | 0.3038  | 0.3391  | 0.3879  | 0.0564  | -0.0479 | 0.2311  | 0.1673  |
| PY04301 | -0.0209 | 0.1404  | 0.1132  | -0.3161 | -0.0026 | 0.2395  | 0.2494  | 0.0172  | 0.2815  | 0.1473  | -0.0664 | 0.2188  |
| PY07420 | -0.2039 | -0.0624 | 0.2178  | -0.1201 | 0.0233  | -0.2839 | -0.3145 | -0.0244 | -0.8232 | -0.307  | 0.2777  | -0.189  |
| PY05805 | 0.2694  | 0.441   | 0.2849  | -0.0134 | -0.1558 | 0.066   | 0.1525  | -0.1079 | 0.1624  | -0.1695 | -0.3411 | 0.2011  |
| PY00048 | -0.3314 | -0.1033 | 0.137   | -0.1142 | -0.0434 | -0.2823 | -0.2736 | -0.3991 | -0.2852 | -0.0105 | -0.1634 | -0.1577 |
| PY04503 | 0.7693  | 0.1545  | -0.2426 | -0.1862 | -0.3    | -0.0651 | -0.0145 | -0.0882 | -0.0939 | 0.1108  | -0.3495 | 0.3526  |
| PY02306 | -0.7466 | -0.0368 | 0.3416  | 0.0798  | 0.0324  | -0.1069 | -0.0316 | -0.0294 | 0.0689  | -0.2128 | 0.1614  | -0.0757 |
| PY01534 | -0.0794 | -0.004  | 0.3534  | 0.3274  | 0.25    | 0.2661  | 0.0817  | 0.1638  | 0.0809  | 0.1053  | -0.1931 | -0.1617 |
| PY05327 | 0.8086  | 0.2087  | 0.271   | 1.1828  | 1.1903  | 0.6818  | 0.388   | 0.362   | 0.5237  | 0.9898  | 0.555   | 0.0555  |
| PY07361 | 0.7328  | 0.2897  | 0.4314  | 0.6148  | 0.0577  | 0.1475  | 0.0735  | -0.2709 | 0.0446  | -0.2722 | -0.5989 | 0.2165  |
| PY02901 | 0.8564  | 0.2163  | -0.1819 | 0.3644  | 0.1889  | 0.0447  | 0.0662  | -0.0494 | -0.1259 | -0.0241 | -0.1281 | 0.1774  |
| PY01614 | 0.1799  | 0.0583  | 0.1454  | -0.2979 | 0.0854  | -0.1847 | 0.1308  | -0.1903 | 0.0499  | -0.2339 | -0.0443 | 0.2476  |
| PY00191 | -1.358  | -0.2677 | -0.1716 | -0.3231 | -0.1554 | -0.06   | -0.1965 | 0.0756  | -0.2369 | 0.0628  | 0.3656  | -0.3906 |
| PY02872 | 0.343   | 0.1062  | 0.393   | 0.1927  | 0.1065  | 0.2561  | 0.4589  | 0.08    | 0.2492  | 0.0884  | -0.3762 | 0.3853  |
| PY01285 | -0.0544 | 0.0512  | -0.1202 | 0.3744  | 0.1263  | 0.3216  | -0.2059 | 0.2506  | -0.6443 | 0.3757  | 0.229   | -0.2326 |
| PY05676 | 0.312   | 0.2112  | 0.1805  | 0.296   | 0.1191  | 0.0399  | -0.0401 | -0.1568 | -0.1787 | 0.0063  | -0.397  | 0.0026  |
| PY02532 | -0.1989 | -0.2426 | -0.2325 | -0.0463 | 0.1957  | 0.1878  | -0.6649 | 0.0689  | -0.2098 | 0.4039  | -0.1281 | -0.4326 |
| PY06939 | -0.1342 | -0.2379 | -0.3665 | 0.0845  | 0.7297  | 0.2168  | 0.0754  | -0.0782 | -0.1176 | 0.3945  | 0.2618  | 0.189   |
| PY01373 | -0.5257 | -0.0496 | 0.1877  | -0.1397 | 0.0113  | 0.1069  | 0.1447  | 0.1692  | 0.0056  | -0.1262 | -0.0375 | -0.1543 |
| PY02416 | -0.6327 | -0.7949 | -1.0853 | 0.1803  | 0.0995  | -0.166  | 0.293   | 0.6105  | 0.4678  | 0.3485  | 0.6569  | 0.1291  |
| PY04174 | 0.4527  | 0.2443  | 0.0323  | -0.0585 | -0.1218 | -0.311  | -0.4596 | -0.4462 | -0.4167 | 0.1034  | -0.3739 | -0.231  |
| PY03931 | 0.6972  | 0.6872  | 0.6921  | 0.0819  | -0.7667 | -0.0889 | 0.2795  | -0.7075 | 0.0997  | -0.214  | -0.8846 | 0.0998  |
| PY05128 | -0.2743 | -0.088  | -0.3313 | 0.0014  | 0.1829  | 0.1564  | 0.0713  | 0.0432  | 0.2254  | 0.278   | -0.227  | 0.0668  |
| PY05934 | 0.0421  | 0.2733  | 0.3752  | -0.2657 | -0.336  | 0.437   | 0.195   | 0.1079  | 0.0793  | 0.0188  | -0.3627 | -0.0466 |
| PY05270 | -0.1192 | -0.3929 | -0.2247 | 0.1968  | 0.3707  | -0.03   | -0.2909 | -0.2058 | -0.1941 | 0.233   | -0.2991 | -0.1669 |
| PY06064 | -0.4186 | -0.4842 | -0.3966 | 0.0822  | 0.39    | 0.3278  | -0.1171 | 0.164   | -0.2356 | 0.3343  | -0.0819 | 0.296   |
| PY03721 | -0.0762 | -0.151  | -0.0549 | 0.4329  | 0.4209  | 0.3469  | -0.1294 | 0.2625  | 0.0366  | 0.4969  | 0.3318  | 0.241   |
| PY05036 | -0.4133 | -0.1955 | -0.2858 | -0.2181 | -0.3061 | -0.3593 | -0.4695 | -0.3771 | -0.1477 | -0.0309 | 0.2802  | -0.086  |
| PY07494 | 0.4643  | 0.0201  | 0.1591  | 0.4898  | 0.5008  | -0.1886 | 0.119   | -0.1515 | 0.041   | 0.1436  | 0.27    | -0.0931 |
| PY06759 | -0.3745 | -0.5386 | -0.8226 | 0.3156  | -0.0982 | -0.4189 | 0.0031  | 0.0604  | 0.512   | 0.9207  | 0.9468  | 0.9632  |
| PY06727 | 0.6546  | 0.0257  | -0.1471 | -0.0441 | 0.5991  | -0.0647 | -0.0058 | -0.5399 | -0.311  | -0.3525 | -0.4207 | 0.1534  |
| PY07467 | -0.1234 | -0.0939 | -0.1499 | -0.3497 | -0.0696 | -0.0238 | 0.1389  | -0.2883 | -0.0142 | 0.0425  | 0.1204  | 0.1497  |
| PY01513 | 0.1697  | 0.0104  | -0.2579 | 0.1354  | 0.0811  | -0.066  | -0.195  | -0.1334 | -0.0657 | 0.0756  | 0.1932  | 0.146   |
| PY02777 | 0.039   | 0.0555  | -0.074  | 0.6854  | 0.2272  | 0.0015  | -0.2219 | 0.1221  | -0.1368 | 0.4042  | 0.3427  | -0.1405 |
| PY07030 | -0.4227 | -0.2151 | -0.1199 | -0.4921 | -0.1421 | 0.089   | 0.261   | 0.0536  | -0.1091 | -0.2412 | 0.184   | -0.0226 |
| PY05926 | -0.0611 | -0.4848 | -0.0835 | -0.0275 | 0.149   | 0.0819  | 0.3822  | 0.3073  | 0.4087  | 0.0974  | 0.1485  | 0.5249  |
| PY05108 | -0.2989 | 0.172   | 0.0433  | -0.5155 | -0.4215 | -0.1868 | -0.1807 | 0.2665  | 0.1742  | 0.1958  | 0.5545  | -0.1247 |
| PY04750 | -0.1523 | -0.388  | -0.1943 | 0.0227  | -0.0175 | 0.1539  | 0.1192  | -0.1886 | -0.0371 | -0.0143 | -0.0495 | 0.2322  |
| PY06767 | 0.0743  | 0.0198  | -0.2035 | 0.6749  | 0.1287  | 0.2962  | -0.1915 | -0.1771 | -0.2611 | -0.3073 | -0.4988 | -0.5236 |
| PY03789 | 0.3964  | -0.1465 | -0.0297 | -0.1504 | -0.2673 | -0.2973 | 0.0033  | -0.0926 | -0.3258 | -0.1127 | 0.0205  | 0.0921  |
| PY03725 | -0.4373 | 0.0825  | 0.4295  | -0.0128 | -0.1544 | 0.0706  | 0.1499  | 0.2185  | 0.3904  | 0.4416  | 0.4912  | 0.2887  |



|         |         |         |         |         |         |         |         |         |         |         |         |         |
|---------|---------|---------|---------|---------|---------|---------|---------|---------|---------|---------|---------|---------|
| PY01639 | -0.5421 | -0.0892 | -0.0972 | -0.3564 | -0.3668 | -0.2401 | -0.0802 | -0.0647 | 0.2312  | -0.1189 | 0.0583  | -0.0735 |
| PY03734 | 0.3177  | 0.2989  | 0.1672  | 0.2585  | 0.1383  | 0.337   | 0.3523  | 0.0364  | 0.0337  | 0.2575  | 0.0674  | -0.0896 |
| PY01815 | -0.2944 | -0.0721 | -0.1021 | -0.0315 | 0.3289  | -0.0232 | -0.2655 | -0.1227 | -0.5519 | 0.1903  | -0.2912 | -0.2734 |
| PY07368 | 0.3902  | 0.1156  | -0.7519 | 0.2358  | -0.3709 | -0.0433 | -0.1636 | 0.2239  | -0.3621 | 0.133   | -0.431  | -0.6106 |
| PY00352 | -0.5208 | -0.1683 | -0.2593 | -0.171  | -0.6127 | -0.4566 | -0.1887 | 0.0909  | 0.1296  | -0.2137 | 0.2883  | -0.1136 |
| PY02284 | 0.0839  | 0.0385  | -0.2981 | 0.1132  | 0.6169  | -0.1406 | -0.0758 | 0.1901  | 0.1081  | 0.1722  | 0.4365  | -0.0557 |
| PY06085 | 0.177   | 0.0974  | -0.1715 | -0.007  | -0.1918 | -0.2523 | -0.1895 | 0.1286  | -0.0283 | -0.0073 | -0.0976 | -0.3404 |
| PY03620 | -0.1968 | -0.0468 | 0.3135  | 0.1137  | 0.1293  | 0.2238  | 0.1356  | -0.0399 | 0.0436  | -0.2111 | -0.0378 | -0.1915 |
| PY01389 | -0.3476 | -0.4022 | -0.3888 | -0.0874 | 0.004   | -0.1135 | -0.1153 | 0.0195  | 0.2461  | 0.2301  | 0.3941  | 0.4699  |
| PY03774 | 0.2544  | 0.0412  | -0.0282 | -0.0566 | 0.297   | -0.1164 | -0.083  | -0.1565 | 0.025   | 0.019   | 0.1307  | 0.0342  |
| PY04186 | 0.1039  | 0.329   | 0.3133  | -0.2864 | -0.6615 | 0.0085  | -0.0703 | -0.2688 | -0.1653 | -0.0251 | -0.3234 | -0.0333 |
| PY06320 | 0.3386  | -0.0425 | 0.1091  | -0.2499 | -0.1582 | -0.0397 | -0.0977 | -0.2627 | -0.0756 | -0.6927 | -0.3959 | -0.0739 |
| PY04869 | 0.523   | 0.2039  | 0.1972  | 0.1895  | -0.1234 | 0.3937  | 0.4144  | 0.0832  | 0.0399  | -0.0627 | -0.5195 | 0.0066  |
| PY03559 | -0.4252 | -1.3314 | -0.1891 | -0.0179 | -0.0037 | -0.313  | -0.0599 | 0.0855  | 0.3149  | 0.1852  | 0.2558  | -0.0679 |
| PY02915 | -0.0218 | 0.045   | 0.3263  | -0.4859 | -0.725  | 0.3665  | 0.3475  | 0.3717  | 0.4676  | -0.8024 | -0.1444 | -0.1077 |
| PY04655 | 0.4809  | 0.126   | 0.0557  | 0.0231  | 0.1908  | 0.0301  | -0.1187 | -0.1738 | -0.1225 | 0.0019  | -0.2501 | -0.2006 |
| PY03505 | 0.2574  | 0.146   | 0.1865  | 0.2003  | -0.0471 | -0.039  | -0.0096 | -0.1112 | -1.2407 | -0.28   | -0.2863 | -0.1656 |
| PY00983 | -0.0013 | 0.1306  | 0.3862  | -0.4426 | -0.1943 | -0.1986 | 0.0111  | -0.3806 | -0.2788 | -0.4779 | -0.5157 | -0.1629 |
| PY04013 | -0.041  | -0.1641 | -0.1686 | 1.0608  | 1.1041  | 0.992   | 0.277   | 0.9659  | 0.2588  | 1.3907  | 1.1521  | 0.2093  |
| PY02808 | 0.4489  | 0.0225  | 0.0706  | -0.0176 | 0.2102  | 0.0324  | 0.1986  | 0.2361  | 0.0619  | 0.1008  | 0.0013  | 0.4636  |
| PY00266 | -0.3465 | 0.1066  | -0.4654 | -0.0973 | 0.1263  | -0.2537 | -0.0152 | 0.2059  | 0.0595  | 0.1589  | 0.4766  | -0.0234 |
| PY03718 | -0.6864 | -0.3536 | -0.2642 | 0.6014  | -0.7457 | -0.477  | -0.2555 | 0.2043  | -0.0314 | 0.2476  | 0.6077  | 0.2576  |
| PY01315 | 0.0273  | -0.1225 | -0.051  | 0.4427  | 0.3347  | -0.3576 | 0.0543  | 0.2491  | 0.092   | 0.5704  | 0.221   | 0.1049  |
| PY01547 | 0.2223  | 0.4387  | 0.3586  | 0.1597  | -0.2261 | 0.1044  | 0.2071  | -0.1015 | 0.1422  | -0.1941 | -0.4672 | 0.2186  |
| PY04685 | -0.6813 | -0.149  | -0.2062 | -0.8896 | -0.2938 | -0.1066 | -0.1027 | 0.1457  | -0.307  | -0.2109 | 0.0625  | -0.4798 |
| PY05429 | -0.4403 | -0.0554 | -0.2717 | -1.3162 | -0.6089 | -0.2181 | 0.192   | 0.0936  | 0.4976  | -0.5217 | 0.1452  | 0.227   |
| PY06840 | 0.0876  | -0.137  | 0.1357  | -0.2634 | 0.4235  | 0.0966  | 0.0866  | -0.3323 | -0.4222 | -0.338  | -0.2645 | 0.0964  |
| PY02013 | -0.7512 | -0.5069 | -0.4956 | -0.0695 | -0.6808 | -0.2583 | 0.116   | 0.2442  | 0.3021  | 0.1509  | 0.8059  | 0.0907  |
| PY04298 | -0.3796 | -0.2989 | -0.1844 | -0.3127 | -0.5891 | -0.128  | 0.1162  | 0.1693  | 0.4774  | 0.0092  | -0.2617 | 0.2889  |
| PY06391 | -0.3213 | 0.2508  | 0.5421  | -0.5222 | -0.4915 | -0.2739 | 0.6794  | 0.0898  | 0.7646  | -0.0013 | -0.0509 | 0.4125  |
| PY03545 | -0.5906 | -0.2046 | -0.1909 | -0.1704 | -0.1469 | -0.2171 | -0.2918 | 0.2124  | 0.5401  | 0.3003  | 0.3274  | -0.1372 |
| PY01820 | -0.0656 | 0.1509  | -0.046  | 0.3475  | 0.0353  | 0.1667  | -0.1418 | 0.0519  | -0.4853 | 0.2565  | -0.2202 | -0.4548 |
| PY01839 | -0.5962 | -0.8417 | -0.5863 | -0.223  | 0.1396  | 0.0949  | -0.0845 | 0.2664  | 0.2169  | 0.1528  | 0.2462  | -0.434  |
| PY00975 | -0.0828 | 0.0238  | -0.2366 | -0.2479 | 0.0363  | 0.2482  | -0.092  | 0.1152  | -0.1587 | 0.2073  | 0.0333  | -0.0291 |
| PY00143 | -0.1683 | 0.1595  | 0.4836  | -0.4271 | -0.4094 | 0.1545  | 0.4673  | 0.1614  | 0.5342  | -0.0767 | -0.426  | -0.0563 |
| PY06023 | 0.0805  | 0.0249  | 0.1869  | -0.1474 | 0.1891  | -0.0991 | 0.093   | -0.0683 | -0.5526 | -0.1171 | 0.1529  | -0.9049 |
| PY05313 | -0.0059 | 0.009   | 0.1727  | -0.0346 | 0.4118  | 0.0328  | -0.1477 | -0.125  | -0.2793 | -0.1331 | 0.2808  | -0.0809 |
| PY06307 | -1.0812 | -0.3514 | 0.0658  | -0.331  | -0.4838 | -0.2548 | -0.0836 | 0.3273  | 0.4262  | 0.1034  | 0.9182  | 0.8242  |
| PY05791 | 0.0976  | 0.2     | -0.3849 | -0.2812 | -0.0054 | -0.1704 | -0.0862 | 0.1783  | -0.0544 | 0.1058  | 0.0728  | -0.1206 |
| PY03057 | -1.1373 | -0.2596 | 0.0278  | -0.1337 | -0.4213 | 0.0455  | 0.1087  | 0.7454  | 0.5798  | 0.4457  | 0.9027  | -0.1749 |
| PY03875 | -0.6511 | 0.0008  | 0.1068  | 0.5394  | 0.4537  | 0.4401  | -0.0299 | 0.5603  | 0.0526  | 0.9576  | 0.5499  | 0.1029  |
| PY01184 | -0.4025 | -0.1159 | 0.0742  | -0.1189 | -0.0223 | -0.4461 | -0.0886 | -0.1152 | -0.152  | 0.2353  | 0.0638  | -0.2974 |
| PY06981 | 0.7843  | 0.5044  | 0.4678  | 0.3841  | -0.3673 | 0.0009  | 0.0385  | -0.3302 | -0.0884 | -0.2846 | -1.006  | 0.001   |
| PY00121 | 0.7892  | 0.1263  | 0.3583  | 0.5813  | 0.3866  | 0.1684  | 0.1854  | -0.2696 | 0.0131  | -0.1618 | -0.3099 | 0.1219  |
| PY03670 | -0.1183 | -0.4016 | -0.2946 | 0.9977  | 0.1085  | 0.2798  | 0.2295  | 0.3845  | 0.3422  | 0.9301  | 0.5872  | 0.4105  |
| PY05729 | -0.1685 | 0.0633  | -0.4498 | -0.134  | 0.0758  | 0.1256  | -0.2288 | 0.0737  | -0.2064 | 0.2644  | -0.3    | -0.0953 |
| PY00444 | -0.3806 | -0.5147 | -0.4211 | -0.0707 | 0.0977  | -0.005  | 0.04    | -0.2007 | -0.228  | 0.0416  | 0.0163  | -0.1068 |
| PY00417 | -0.3003 | -0.3596 | -0.5819 | -0.205  | 0.1615  | -0.0886 | 0.083   | 0.368   | 0.1296  | 0.5273  | 1.038   | 0.178   |
| PY06054 | -0.3912 | -0.0115 | 0.1769  | -0.1997 | 0.0766  | -0.39   | -0.114  | 0.1704  | 0.2848  | 0.0653  | 0.1866  | -0.1883 |
| PY05495 | -0.3399 | -0.1961 | 0.0406  | -0.0337 | 0.0364  | 0.2574  | 0.0024  | -0.2146 | -0.0056 | -0.3987 | -0.0251 | -0.0867 |
| PY04967 | 0.1249  | 0.227   | 0.1769  | 0.5462  | 0.2902  | 0.0792  | 0.1651  | 0.0418  | 0.1141  | -0.1668 | -0.6054 | -0.3945 |
| PY03211 | -0.4008 | -0.1255 | -0.5805 | -0.0061 | 0.166   | 0.2643  | 0.1607  | 0.348   | 0.1069  | 0.0316  | 0.0032  | -0.1389 |
| PY07338 | -1.3625 | -0.0251 | 0.0399  | -0.5604 | -0.395  | -0.2278 | 0.1819  | 0.5392  | 0.4545  | -0.3069 | 0.9687  | -0.9539 |
| PY00105 | 0.0942  | -0.0703 | -0.1797 | 0.4648  | 0.2099  | 0.1497  | -0.0269 | 0.0151  | -0.0853 | -0.2677 | -0.0868 | 0.0506  |
| PY03217 | -0.0741 | -0.5786 | -0.5881 | 0.1921  | 0.1697  | 0.5379  | 0.0161  | 0.3406  | -0.0449 | 0.151   | -0.0379 | 0.0172  |
| PY00651 | 0.2914  | 0.2859  | 0.0052  | -0.1853 | 0.2267  | 0.0465  | 0.3164  | -0.0923 | 0.0667  | 0.1442  | 0.0787  | 0.221   |
| PY01890 | 0.5705  | 0.3514  | 0.8535  | -0.0787 | -0.1795 | 0.2098  | 0.5235  | 0.0288  | 0.2998  | -0.1568 | -0.2422 | 0.4018  |
| PY01317 | 0.1476  | 0.0493  | 0.1732  | -0.1791 | -0.1245 | 0.068   | 0.28    | -0.0597 | 0.0243  | -0.0083 | -0.2628 | 0.2492  |
| PY05198 | 0.4815  | -0.0525 | -0.0474 | -0.3483 | -0.2906 | 0.1106  | 0.173   | 0.4818  | 0.2775  | -0.0099 | 0.2926  | -0.3077 |
| PY03927 | 0.4588  | -0.0537 | -0.2426 | 0.6739  | 0.3659  | -0.3351 | -0.0408 | -0.0958 | 0.0368  | 0.2228  | 0.1021  | 0.2361  |
| PY07102 | -0.3155 | -0.2615 | -0.4684 | -0.085  | -0.4737 | -0.5451 | -0.4822 | -0.3739 | 0.2018  | 0.048   | 0.0137  | -0.1866 |
| PY06975 | -0.1573 | -0.0713 | 0.0944  | -2.3791 | -1.2939 | -0.3057 | 0.1192  | -1.0079 | 0.3522  | -1.7559 | -0.9994 | 0.468   |
| PY07077 | 0.2319  | -0.3766 | -0.8043 | -0.4346 | -0.0144 | -0.3782 | -0.156  | 0.0163  | -0.1115 | -0.3191 | -0.1859 | -0.2012 |

|         |         |         |         |         |         |         |         |         |         |         |         |         |
|---------|---------|---------|---------|---------|---------|---------|---------|---------|---------|---------|---------|---------|
| PY01496 | -0.5644 | -0.3055 | 0.2642  | -0.2887 | -0.6961 | 0.1921  | 0.3098  | -0.0188 | 0.1135  | 0.3207  | 0.4191  | 0.1836  |
| PY00602 | -0.4715 | -0.2611 | -0.2991 | -0.1944 | -0.3312 | -0.1171 | 0.0472  | 0.1952  | 0.2136  | -0.1505 | 0.069   | -0.0375 |
| PY01682 | 0.5462  | 0.164   | 0.2747  | 0.033   | 0.4601  | -0.2193 | -0.1849 | -0.6553 | -0.459  | -0.4532 | -0.3197 | -0.2195 |
| PY02575 | 0.7346  | 0.1095  | 0.1234  | 0.6541  | 0.7525  | 0.211   | -0.0233 | 0.0264  | -0.1506 | 0.1717  | 0.5114  | -0.0198 |
| PY05127 | -0.205  | -0.0453 | 0.0378  | -0.7445 | -0.2332 | -0.0424 | -0.153  | 0.147   | 0.2163  | -0.1146 | 0.5022  | 0.0433  |
| PY00004 | 0.2036  | 0.2868  | 0.5441  | 0.1677  | 0.0352  | 0.077   | 0.4264  | 0.0224  | 0.2912  | 0.0609  | -0.0647 | 0.1802  |
| PY07419 | 0.3055  | -0.1459 | -0.55   | -0.5459 | -0.082  | -0.2456 | -0.2358 | -0.1117 | -0.6708 | 0.061   | -0.0788 | 0.0024  |
| PY06639 | 0.5918  | 0.3657  | -0.0601 | 0.2156  | -0.1398 | 0.0373  | -0.3094 | 0.0047  | -0.0912 | -0.1352 | -0.5938 | -0.1526 |
| PY05838 | 0.203   | 0.1469  | -0.0626 | -0.253  | -0.295  | -0.0105 | 0.103   | -0.1718 | 0.299   | -0.1225 | -0.1332 | 0.5646  |
| PY02024 | 0.1365  | 0.085   | -0.0949 | -0.115  | -0.0142 | -0.1392 | -0.1698 | -0.204  | -0.3341 | -0.1475 | -0.3733 | -0.054  |
| PY03210 | -0.8368 | -0.1839 | 0.0652  | -0.0609 | 0.238   | 0.4488  | 0.2633  | 0.4755  | 0.2104  | 0.3417  | 0.5259  | -0.1934 |
| PY04890 | -0.2383 | 0.207   | -0.2375 | -0.1872 | -0.4233 | -0.2221 | -0.0427 | -0.3608 | -0.2273 | 0.0183  | -0.2053 | -0.1288 |
| PY03203 | 1.1064  | 0.5006  | 0.3022  | 0.2704  | -0.8499 | -0.7149 | -0.6081 | -0.7418 | -0.3456 | -0.5929 | -1.2126 | -0.3139 |
| PY05361 | -0.0708 | -0.111  | -0.6077 | 0.759   | 0.6772  | 0.1551  | -0.0943 | -0.0478 | 0.0648  | -0.0466 | -0.2831 | -0.1302 |
| PY01528 | -0.0192 | -0.2757 | -0.2563 | 0.2171  | 0.0508  | 0.1537  | 0.0538  | 0.2422  | 0.3097  | 0.062   | -0.1014 | -0.0707 |
| PY01953 | 0.5527  | -0.046  | -0.4183 | 0.6536  | 0.2068  | 0.1532  | -0.0095 | -0.0826 | 0.2418  | 0.5265  | -0.1277 | 0.5226  |
| PY06446 | 0.5547  | 0.3005  | 0.1339  | 0.3905  | 0.1357  | -0.1715 | -0.0426 | -0.4585 | -0.1349 | -0.2507 | -0.4176 | -0.0275 |
| PY04934 | -0.0968 | 0.2597  | -0.1724 | 0.1384  | -0.6932 | -0.0133 | -0.1373 | 0.0928  | -0.2726 | 0.0626  | -0.462  | 0.0685  |
| PY03954 | -0.9453 | -0.2788 | -0.055  | -0.0682 | 0.0127  | -0.0028 | -0.0784 | 0.5606  | 0.2737  | -0.0317 | 0.9314  | -0.0223 |
| PY01210 | 0.6908  | 0.2685  | 0.5824  | 0.3905  | -0.2022 | 0.3598  | 0.2719  | -0.043  | 0.3508  | -0.146  | -0.4631 | 0.0893  |
| PY04167 | -0.1676 | 0.1116  | 0.0587  | 0.0988  | -0.3503 | 0.1406  | 0.4427  | 0.2363  | 0.6139  | -0.3089 | -0.0889 | 0.1113  |
| PY07836 | -0.475  | 0.3708  | 1.1156  | 0.2019  | -0.3348 | -0.0058 | 0.1427  | -0.1537 | 0.0181  | -0.2313 | -0.3458 | -0.0071 |
| PY03473 | -0.2371 | -0.1998 | -0.137  | 0.0498  | 0.1801  | 0.4481  | 0.1372  | 0.0052  | -0.2495 | -0.0312 | 0.2336  | -0.1115 |
| PY06314 | 0.7578  | 0.3537  | 0.2199  | 0.0151  | -0.4575 | 0.2714  | 0.333   | -0.0337 | 0.2585  | 0.0588  | -0.442  | 0.345   |
| PY04447 | 0.99    | 0.8471  | 0.9147  | -0.0197 | -0.4797 | 0.3661  | 1.0541  | 0.319   | 0.9539  | 0.3735  | -0.3879 | 0.9755  |
| PY05773 | 0.0397  | 0.2565  | 0.2539  | -0.1559 | 0.4018  | 0.4297  | 0.3906  | -0.0467 | 0.1734  | -0.3928 | -0.1593 | -0.0507 |
| PY06911 | 0.6127  | 0.5234  | -0.1156 | 0.5999  | -0.2328 | -0.0856 | -0.193  | -0.3932 | -0.3189 | -0.355  | -0.7326 | -0.3309 |
| PY07140 | 0.196   | -0.0292 | 0.4143  | 0.2875  | 0.0128  | 0.1912  | 0.099   | -0.0995 | -0.1577 | -0.1692 | -0.3167 | 0.0721  |
| PY03981 | 0.3347  | 0.1843  | 0.3197  | -0.0538 | -0.2505 | -0.217  | 0.1077  | 0.1241  | 0.3057  | 0.3803  | -0.2193 | 0.3992  |
| PY05353 | -0.1653 | 0.1466  | 0.2619  | 0.3276  | 0.2152  | 0.3976  | 0.3337  | 0.2683  | 0.1763  | 0.1906  | -0.0756 | 0.3346  |
| PY06837 | 0.2639  | 0.4222  | 0.2315  | -0.0399 | -0.2888 | 0.1105  | 0.1241  | -0.1212 | 0.1733  | 0.2113  | -0.2032 | 0.3026  |
| PY00557 | -0.1099 | -0.0714 | 0.1374  | -0.1254 | 0.3973  | 0.099   | 0.0703  | -0.2475 | -0.1061 | -0.05   | -0.0542 | 0.192   |
| PY05072 | 0.2003  | 0.1064  | 0.1267  | -0.571  | 0.2899  | -0.2562 | -0.0138 | 0.0852  | -0.165  | -0.2548 | 0.0724  | 0.0883  |
| PY04468 | -1.0869 | -0.6376 | -0.6814 | -0.6297 | -0.3373 | -0.1234 | 0.1514  | 0.3721  | 0.2195  | 0.3343  | 0.9303  | 0.0089  |
| PY02977 | 0.4333  | 0.3405  | 0.2725  | -0.7698 | -0.8735 | -0.3726 | -0.8625 | -0.1023 | 0.2388  | -0.2762 | -0.4951 | 0.0659  |
| PY03627 | 0.0811  | 0.2803  | 0.3737  | 0.3923  | -0.1295 | 0.1496  | 0.1201  | 0.1093  | 0.5335  | 0.512   | -0.0188 | 0.596   |
| PY04060 | -0.7395 | 0.07    | 0.5272  | 0.1697  | -0.3775 | -0.0852 | 0.1274  | 0.0036  | 0.244   | 0.264   | 0.4533  | 0.0131  |
| PY00920 | -0.1192 | -0.0335 | -0.1992 | 0.0077  | -0.1153 | -0.239  | -0.1375 | 0.1246  | -0.0839 | 0.1623  | 0.1237  | -0.1122 |
| PY04976 | 0.049   | 0.087   | 0.0978  | 0.4239  | 0.0445  | -0.2068 | -0.1658 | -0.0958 | -0.2446 | 0.0478  | 0.0938  | -0.0857 |
| PY07393 | 0.0634  | 0.1465  | -0.1128 | -0.3266 | -0.0829 | -0.269  | -0.2074 | -0.3641 | -0.214  | -0.3252 | -0.2308 | -0.2459 |
| PY07506 | -0.4658 | -0.3209 | 0       | -0.6405 | -0.589  | 0.0395  | 0.0376  | 0.2641  | 0.3961  | -0.0776 | -0.6533 | -0.5036 |
| PY05753 | 0.7406  | 0.5422  | 0.4268  | 0.5988  | 0.098   | 0.3281  | 0.3126  | -0.0674 | -0.1959 | -0.0827 | 0.0521  | 0.2324  |
| PY00999 | -0.0007 | -0.1852 | 0.0218  | -0.2804 | 0.1836  | 0.0133  | -0.0903 | -0.1919 | -0.3996 | -0.1906 | -0.139  | -0.6468 |
| PY06160 | 0.0376  | 0.461   | 0.5974  | 0.0753  | -0.2182 | 0.1047  | -0.2182 | -0.7595 | -0.5074 | -0.5721 | -0.6946 | -0.5567 |
| PY06719 | -0.1796 | 0.0139  | 0.2771  | -0.0866 | 0.2424  | -0.0114 | 0.0647  | 0.0664  | -0.1288 | 0.1427  | 0.1713  | 0.1618  |
| PY00734 | -0.2734 | -0.6542 | -0.2482 | -0.186  | 0.661   | 0.0783  | -0.2375 | -0.2374 | -0.8289 | -0.1127 | 0.5424  | -0.4395 |
| PY00943 | 0.3568  | 0.0996  | -0.0515 | 0.0471  | 0.1219  | -0.0463 | -0.123  | -0.4294 | -0.1576 | -0.3252 | -0.2051 | -0.0822 |
| PY03162 | -0.2063 | -0.0121 | -0.2748 | 0.1025  | 0.1945  | -0.0764 | -0.2655 | 0.4403  | 0.2047  | -0.0242 | 0.3769  | 0.4576  |
| PY07834 | 0.3752  | 0.2125  | 0.1258  | 0.2835  | 0.4103  | 0.1586  | 0.3029  | -0.0635 | -0.001  | 0.5203  | -0.0549 | 0.3768  |
| PY02754 | -0.2391 | -0.0414 | -0.3431 | 0.8538  | 0.69    | 0.2874  | 0.229   | 0.3241  | 0.321   | 0.9519  | 0.8876  | 0.6245  |
| PY03493 | 0.7526  | 0.3149  | 0.4181  | -0.4835 | -0.4036 | -0.0713 | 0.4973  | -0.326  | 0.2629  | -0.484  | -0.3076 | 0.4978  |
| PY06077 | -0.4589 | 0.2205  | -0.1064 | 0.3645  | -0.7663 | -0.1889 | 0.2732  | 0.0177  | 0.2793  | -0.5468 | 0.0133  | -0.2493 |
| PY05437 | 0.2866  | 0.2565  | 0.0867  | -0.1998 | -0.076  | -0.1748 | 0.0244  | 0.0281  | -0.0956 | 0.056   | -0.0871 | 0.0203  |
| PY00323 | -1.3707 | -0.2313 | 0.3216  | -0.3216 | -0.1849 | 0.034   | -0.2443 | 0.0808  | 0.1509  | 0.1679  | 0.3831  | -0.5477 |
| PY03268 | -0.0074 | 0.1349  | -0.0304 | -0.6617 | -0.2508 | 0.2977  | 0.0609  | 0.076   | 0.3238  | -0.136  | -0.0834 | 0.2251  |
| PY06213 | 0.6027  | 0.2638  | 0.3734  | 1.3817  | 0.4321  | -0.0308 | -0.1472 | 0.1586  | -0.3347 | 0.7425  | -0.2157 | -0.455  |
| PY01202 | 0.1505  | -0.2374 | -0.44   | 0.2116  | 0.1593  | 0.0859  | -0.2635 | -0.0972 | -0.4564 | 0.0099  | -0.3157 | -0.1933 |
| PY07194 | -1.0045 | -0.2817 | -0.3519 | -0.1795 | -0.4411 | -0.1441 | 0.0859  | 0.3653  | 0.2928  | 0.5496  | 0.7927  | 0.6238  |
| PY05191 | -0.1945 | 0.0738  | 0.1339  | 0.0078  | -0.0839 | 0.0121  | -0.1268 | -0.1299 | -0.4721 | -0.0486 | -0.2868 | -0.2158 |
| PY02935 | 0.7873  | 0.1156  | 1.1538  | 0.4452  | 0.2515  | 0.088   | 0.2435  | -0.111  | 0.0389  | -0.5032 | -0.232  | 0.3747  |
| PY00244 | -1.0306 | -0.4524 | 0.123   | -0.5195 | 0.0655  | -0.2197 | -0.2487 | -0.0824 | -0.1996 | -0.0502 | 0.302   | -0.4243 |
| PY04247 | 0.309   | 0.0815  | -0.0957 | 0.0977  | -0.0904 | -0.2826 | -0.2891 | -0.3897 | -0.2431 | -0.2191 | -0.2568 | -0.2916 |
| PY03943 | -0.5329 | -0.151  | -0.205  | 0.0761  | -0.9683 | -0.1861 | 0.1002  | 0.4596  | 0.4079  | 0.2854  | 0.5007  | 0.2523  |

|         |         |         |         |         |         |         |         |         |         |         |         |         |
|---------|---------|---------|---------|---------|---------|---------|---------|---------|---------|---------|---------|---------|
| PY01854 | 0.0035  | 0.0699  | 0.0659  | 0.1052  | -0.217  | 0.4014  | 0.1062  | -0.0094 | -0.0248 | 0.3989  | -0.2866 | 0.1253  |
| PY06890 | 0.4057  | 0.2901  | -0.0397 | 0.2954  | 0.3765  | 0.0821  | 0.1449  | 0.2023  | 0.0883  | 0.4337  | 0.0898  | 0.1271  |
| PY04822 | 0.4017  | 0.3106  | 0.2198  | 0.0632  | -0.2609 | 0.0346  | -0.0502 | -0.2562 | -0.0694 | 0.0965  | -0.3146 | -0.0912 |
| PY02500 | -0.7888 | 0.0735  | 0.5007  | -0.3992 | -0.7838 | -0.225  | 0.2415  | 0.0702  | 0.3826  | -0.0961 | 0.2231  | 0.323   |
| PY04038 | 0.4617  | 0.1793  | 0.2262  | 0.9356  | 0.0057  | 0.0746  | 0.3322  | 0.5308  | 0.4321  | 0.6028  | -0.1155 | 0.2558  |
| PY06124 | -1.5591 | -0.4504 | -0.3459 | -0.1932 | -0.3452 | -0.2084 | -0.0602 | 0.3967  | 0.2984  | -0.3693 | 0.1019  | -0.6188 |
| PY01993 | -0.3131 | -0.3812 | 0.0746  | -0.1925 | -0.1738 | -0.0527 | 0.0175  | -0.0546 | 0.0022  | 0.0313  | 0.236   | 0.0959  |
| PY05315 | 0.7731  | 0.154   | 0.1763  | -0.0309 | 0.3679  | -0.1879 | 0.0475  | -0.2594 | -0.1499 | -0.3559 | -0.461  | 0.1003  |
| PY06460 | 0.0986  | -0.1096 | -0.0489 | -0.2688 | -0.0947 | -0.2046 | -0.0597 | -0.261  | 0.0883  | -0.3801 | -0.4163 | 0.0185  |
| PY02506 | -0.3545 | -0.2396 | 0.0294  | 0.7964  | 0.2585  | 0.201   | -0.0943 | 0.2408  | -0.1463 | 0.1503  | -0.1099 | -0.0332 |
| PY03258 | 0.141   | -0.3381 | 0.0645  | 1.4586  | 0.7804  | 1.7604  | -0.0528 | 0.898   | 0.2692  | 1.5614  | 0.9471  | 0.3395  |
| PY00808 | -0.7671 | -0.3432 | 0.0313  | 0.0019  | 0.2594  | -0.0485 | -0.2786 | 0.3108  | -0.3773 | 0.2736  | 0.5217  | -0.2095 |
| PY03839 | 0.098   | -0.2551 | -0.0474 | 0.072   | -0.0774 | -0.1068 | -0.2029 | 0.3762  | 0.2557  | 0.2392  | 0.5343  | 0.0639  |
| PY04533 | -0.372  | 0.0229  | -0.2455 | -0.0699 | 0.03    | -0.2545 | -0.2192 | 0.1734  | -0.1208 | 0.005   | -0.1086 | -0.0465 |
| PY04915 | 0.191   | 0.0664  | -0.4883 | -0.0749 | -0.0753 | -0.3813 | -0.2237 | -0.2943 | -0.3304 | -0.447  | -0.2847 | -0.0668 |
| PY01263 | -0.6314 | -0.4705 | -0.5455 | -0.4235 | -0.3123 | -0.774  | -0.2425 | -0.0081 | 0.5763  | -0.838  | 0.3227  | 0.1621  |
| PY04330 | -0.2837 | -0.0062 | -0.0362 | 0.205   | 0.1123  | -0.4961 | 0.1641  | -0.0593 | -0.1954 | 0.7059  | 0.0644  | 1.5048  |
| PY01678 | -0.519  | 0.327   | 0.4901  | -0.0956 | -0.0654 | -0.1009 | 0.0149  | -0.0482 | -0.0012 | -0.0637 | -0.0989 | -0.9104 |
| PY06501 | 0.0103  | 0.0107  | 0.1117  | 0.107   | 0.4768  | -0.0313 | -0.3946 | -0.2212 | -0.1364 | -0.1481 | 0.4578  | -0.1903 |
| PY01156 | 0.5295  | 0.4093  | 1.0393  | 0.2806  | -0.6646 | 0.198   | 0.9137  | 0.4573  | 0.9038  | -0.1584 | -0.2321 | 0.4494  |
| PY06959 | 1.133   | 0.7103  | 0.7477  | 0.0904  | -0.2267 | 0.1196  | 0.3085  | -0.3679 | 0.1139  | -0.2091 | -0.9822 | -0.0553 |
| PY02030 | 0.1491  | -0.0185 | -0.014  | 0.334   | 0.1008  | -0.0014 | -0.2509 | -0.0763 | -0.3284 | 0.4691  | -0.1533 | -0.26   |
| PY03484 | 0.0752  | -0.0871 | -0.2154 | 0.2777  | -0.0076 | -0.0667 | 0.0271  | 0.0835  | 0.3566  | 0.2215  | -0.0092 | 0.2233  |
| PY06250 | -0.2148 | -0.1778 | -0.3724 | 0.7004  | 0.1936  | 0.2244  | 0.0894  | 0.0439  | -0.0259 | -0.3284 | 0.0327  | 0.1482  |
| PY06259 | -0.4441 | -0.1446 | -0.4054 | 0.0373  | 0.9256  | -0.0574 | 0.1185  | 0.1704  | 0.2641  | 0.213   | -0.0956 | -0.2473 |
| PY06730 | -0.3502 | -0.0839 | 0.0104  | -0.028  | -0.0215 | -0.2741 | -0.1413 | 0.0913  | 0.123   | -0.261  | 0.6577  | 0.0131  |
| PY00069 | 0.3469  | 0.1481  | -0.1542 | 0.5874  | -0.0855 | 0.1868  | 0.1678  | -0.1061 | -0.0695 | -0.4154 | 0.053   | 0.3543  |
| PY04096 | 0.1584  | -0.4189 | -0.7462 | -0.3674 | 0.1163  | -0.2344 | -0.18   | 0.0139  | -0.1107 | 0.1875  | 0.4882  | 0.1908  |
| PY03426 | 1.1591  | 0.5356  | 0.4315  | 0.4195  | 0.3126  | 0.226   | 0.3688  | -0.1733 | -0.2249 | -0.011  | -0.6862 | 0.1078  |
| PY02080 | 1.0109  | 0.5466  | 1.0308  | 0.0062  | -0.4303 | -0.0561 | 0.0949  | -0.7979 | 0.2132  | -0.3551 | -1.1429 | 0.0115  |
| PY01223 | 0.0031  | -0.7133 | -0.7929 | 0.0804  | 0.3683  | 0.0387  | -0.2344 | 0.1617  | -0.2054 | 0.0699  | 0.4839  | 0.0988  |
| PY03950 | 0.1794  | 0.1147  | 0.3284  | -0.1734 | -0.3179 | 0.0319  | 0.1635  | -0.3065 | 0.0895  | -0.6865 | 0.2049  | 0.1397  |
| PY01816 | 0.4312  | 0.3329  | 0.3701  | -0.1248 | -0.2202 | 0.0057  | -0.1326 | -0.2091 | 0.0432  | -0.1295 | -0.3017 | 0.2148  |
| PY00610 | 0.2685  | -0.4858 | -0.1543 | -0.1403 | 0.1884  | -0.1177 | -0.1981 | -0.1034 | -0.1247 | 0.0275  | 0.0136  | -0.4275 |
| PY01258 | -0.0888 | -0.0518 | -0.3968 | 0.1548  | 0.6116  | -0.1158 | -0.1284 | -0.2451 | -0.3364 | -0.2833 | 0.3921  | -0.1054 |
| PY06036 | 0.5868  | 0.6524  | 0.6698  | 0.0158  | -0.3966 | 0.4444  | 0.6505  | -0.0415 | 0.2206  | -0.4841 | -0.8402 | -0.0767 |
| PY04644 | 0.1347  | -0.1733 | -0.0458 | 0.2932  | 0.1302  | 0.0495  | -0.0379 | -0.0187 | -0.1785 | -0.4071 | -0.2648 | 0.1223  |
| PY05518 | -0.2508 | 0.2117  | 0.1532  | 0.182   | -0.1131 | -0.185  | -0.1173 | -0.2451 | -0.0679 | -0.6195 | 0.1016  | -0.3116 |
| PY03371 | 0.8464  | 0.5116  | 0.4019  | 0.5222  | -0.1395 | 0.1071  | 0.4735  | -0.2936 | 0.2521  | 0.2329  | -0.4915 | 0.3607  |
| PY07616 | -0.8318 | -1.1802 | -1.1605 | -0.6296 | 0.1519  | -0.1438 | -0.0188 | 0.3553  | 0.2447  | 0.0938  | 0.1769  | -0.1518 |
| PY03022 | 1.23    | 0.8691  | 1.2933  | -0.1541 | -0.1541 | -0.2178 | 0.071   | -0.5964 | -0.1568 | -0.6061 | -0.8593 | 0.1839  |
| PY03249 | 0.0006  | 0.2297  | 0.1887  | 0.0006  | -0.0539 | 0.2034  | 0.3267  | -0.0049 | 0.1456  | -0.284  | -0.1782 | -0.1272 |
| PY02658 | 0.0176  | 0.22    | -0.2388 | -0.0564 | -0.6452 | -0.1352 | -0.0757 | 0.2877  | 0.2521  | 0.0062  | 0.0683  | 0.2438  |
| PY05761 | -0.0572 | 0.1121  | -0.2173 | -0.3579 | -0.1276 | 0.0965  | 0.0755  | 0.2694  | 0.1115  | 0.2706  | -0.2813 | -0.0596 |
| PY03449 | -0.6176 | -0.1201 | -0.5541 | -0.6325 | -0.0116 | -0.0707 | 0.2446  | -0.2922 | -0.1952 | 0.0884  | 0.0048  | 0.1504  |
| PY04086 | 0.4958  | 0.508   | 0.278   | -0.2089 | -0.2492 | -0.8616 | -0.4138 | -0.3804 | -0.0541 | -0.2578 | -0.0161 | -0.2449 |
| PY02951 | 0.208   | 0.1748  | -0.0217 | 0.043   | -0.3314 | -0.2098 | -0.0552 | 0.1914  | 0.1731  | -0.0297 | 0.1317  | -0.1038 |
| PY04627 | 0.2802  | 0.1902  | 0.2429  | -0.269  | 0.0568  | -0.1023 | -0.2651 | -0.0785 | -0.1488 | -0.0232 | 0.2518  | -0.0158 |
| PY00969 | -0.4094 | -0.0257 | 0.0115  | 0.2772  | 0.3256  | 0.1826  | 0.0381  | 0.1113  | -0.3424 | 0.2084  | 0.1331  | -0.0902 |
| PY03324 | -2.6608 | -0.7955 | -0.7111 | -1.6434 | -1.5055 | -0.5868 | -0.1351 | 0.7784  | 0.3348  | -0.196  | 0.1838  | -0.6356 |
| PY00639 | 0.5071  | 0.2192  | -0.3554 | 0.3491  | 0.2907  | 0.0066  | -0.1125 | -0.1697 | -0.3478 | 0.0771  | -0.4747 | 0.0538  |
| PY00568 | -0.3136 | -0.4395 | -0.38   | -1.0786 | -0.7756 | -0.2766 | -0.1189 | -0.1396 | -0.546  | -0.5127 | -0.0613 | -0.0004 |
| PY02224 | 1.2392  | 0.7833  | 0.5406  | 0.3998  | -0.4222 | 0.0694  | 0.2659  | -0.4706 | 0.2622  | -0.2809 | -1.1407 | 0.1541  |
| PY03908 | -0.2284 | -0.1272 | -0.4587 | 0.0024  | 0.2758  | 0.0769  | 0.0452  | 0.1359  | -0.117  | 0.2709  | 0.3231  | -0.0579 |
| PY02538 | 0.4037  | 0.2254  | 0.1327  | 0.7773  | -0.1123 | 0.6116  | -0.2196 | 0.011   | -0.3614 | 1.0457  | -0.436  | -0.0464 |
| PY05101 | 1.9608  | 0.7128  | -0.792  | -0.203  | -0.0393 | -0.5345 | -0.6218 | -0.7881 | -0.7263 | -0.6531 | -0.7358 | -0.8633 |
| PY03790 | 0.3662  | 0.2568  | 0.4427  | -0.092  | -0.6034 | -0.0506 | -0.0141 | 0.1207  | 0.5514  | -0.0303 | -0.5425 | 0.3129  |
| PY06414 | -0.6072 | -0.3219 | -0.627  | -0.7711 | 0.0399  | 0.5513  | -0.0418 | -0.2841 | -0.3441 | -0.5948 | 0.0325  | -0.0027 |
| PY00420 | -0.1358 | -0.2895 | -0.3427 | 0.1854  | -0.0524 | -0.0309 | -0.281  | -0.0929 | -0.2882 | -0.0079 | -0.223  | -0.0343 |
| PY01970 | 0.7086  | 0.3928  | 0.3908  | 0.3448  | -0.0341 | 0.0695  | 0.0387  | 0.014   | -0.1957 | 0.1417  | -0.1731 | -0.0049 |
| PY06342 | 0.2135  | -1.4184 | -2.2038 | 0.729   | 1.6117  | 0.3652  | -0.2641 | -0.1678 | -0.8158 | 0.3476  | -0.7554 | 0.4391  |
| PY05320 | -0.5934 | -1.015  | -0.7322 | -0.7118 | -0.0147 | -0.062  | -0.1776 | 0.3406  | 0.4717  | 0.2788  | 0.6567  | -0.4818 |
| PY00632 | 0.171   | -0.2259 | 0.1514  | 0.4271  | 0.3334  | 0.1825  | 0.1643  | 0.0898  | -0.0158 | -0.2272 | 0.1117  | -0.0437 |

|         |         |         |         |         |         |         |         |         |         |         |         |         |
|---------|---------|---------|---------|---------|---------|---------|---------|---------|---------|---------|---------|---------|
| PY05280 | 0.242   | -0.2795 | -0.5097 | -0.0587 | -0.1519 | -0.1567 | -0.1188 | 0.2041  | -0.0771 | 0.3469  | -0.2294 | 0.2941  |
| PY01179 | -0.1816 | 0.0497  | -0.0506 | 0.0495  | 0.289   | 0.2908  | 0.0013  | 0.1468  | 0.0638  | -0.0674 | 0.2254  | 0.1485  |
| PY06529 | 0.7914  | 0.3052  | 0.0782  | 0.2897  | 0.4071  | -0.1762 | -0.097  | -0.3686 | -0.3127 | -0.3265 | -0.1701 | 0.0802  |
| PY06821 | 0.7045  | 0.3339  | -0.0631 | 1.0939  | 0.4219  | -0.0015 | 0.3209  | -0.1677 | -0.1662 | -0.3949 | -0.8383 | 0.0586  |
| PY01095 | -0.253  | -0.6028 | -0.9613 | -0.3341 | 0.0955  | -0.3211 | -0.0939 | -0.0156 | -0.0796 | -0.2397 | 0.289   | 0.5542  |
| PY05811 | 0.4601  | -0.0464 | 0.0386  | 0.1941  | 0.1154  | -0.0062 | 0.0236  | -0.3009 | 0.3443  | -0.0283 | -0.0565 | 0.032   |
| PY02617 | 0.7826  | 0.0396  | 0.1031  | 0.2242  | -0.2965 | 0.1761  | 0.384   | 0.3509  | 0.3383  | 0.5321  | -0.4771 | 0.2987  |
| PY06373 | -0.1147 | -0.3437 | -0.2618 | -0.0454 | -0.1664 | 0.0731  | -0.0515 | -0.1569 | -0.2597 | -0.0978 | -0.0436 | -0.0278 |
| PY03812 | -0.2866 | -0.1646 | -0.1964 | -0.8861 | -0.4317 | -0.1027 | 0.0585  | 0.1265  | 0.2465  | -0.5678 | 0.0372  | 0.0828  |
| PY02062 | -0.1049 | -0.3822 | 0.1599  | 0.2842  | 0.1847  | 0.4308  | 0.1338  | -0.0329 | 0.1522  | 0.2209  | 0.0159  | 0.0187  |
| PY05014 | -1.014  | -0.0759 | -0.0469 | -0.5523 | -0.0302 | 0.1242  | 0.1873  | -0.049  | 0.0573  | 0.222   | 0.6198  | -0.1717 |
| PY04760 | -0.9249 | -0.2694 | -0.6087 | -0.804  | -0.326  | -0.1384 | 0.0546  | 0.5774  | 0.0792  | -0.0937 | 0.2683  | -0.4436 |
| PY06069 | -0.7526 | -0.1322 | 0.2148  | 0.2632  | 0.3798  | 0.569   | 0.2831  | 0.3678  | -0.0662 | 0.5195  | 0.0342  | -0.2314 |
| PY04610 | -0.276  | -0.0743 | -0.0851 | -0.3766 | -0.0477 | 0.1596  | 0.1147  | -0.1204 | -0.0485 | 0.0888  | -0.1374 | 0.1953  |
| PY07020 | 0.288   | 0.2072  | -0.3067 | 0.8851  | 0.5052  | 0.1552  | 0.0121  | -0.0536 | 0.285   | 0.3987  | 0.299   | 0.4662  |
| PY02585 | -0.6283 | -0.1418 | -0.138  | 0.0131  | -0.6768 | 0.1018  | 0.0704  | 0.3472  | 0.1165  | -0.6271 | -0.1719 | -0.5322 |
| PY01253 | -0.459  | -0.4308 | -0.5607 | -0.4444 | 0.0647  | -0.1423 | -0.1058 | 0.196   | -0.0078 | 0.0031  | 0.5765  | -0.405  |
| PY06256 | -0.5977 | -0.0658 | -0.292  | 0.1285  | -0.3119 | 0.2649  | 0.1816  | 0.1587  | -0.2512 | -0.1632 | 0.1725  | -0.2223 |
| PY03757 | -0.2964 | 0.1412  | 0.301   | 0.3002  | -0.0577 | -0.2798 | -0.4484 | -0.3162 | -0.382  | 0.1014  | -0.266  | -0.2364 |
| PY05225 | 0.4371  | 0.2679  | 0.5753  | -0.1673 | 0.1416  | 0.3362  | 0.2318  | -0.1822 | -0.1766 | -0.3554 | -0.6301 | -0.1044 |
| PY01118 | -0.592  | -0.3877 | -0.1817 | 0.043   | 0.2939  | -0.03   | -0.2121 | -0.2772 | -0.4003 | -0.2557 | -0.2274 | 0.1342  |
| PY00516 | -0.1345 | -0.2228 | -0.1503 | 0.0943  | 0.3363  | -0.1807 | -0.3768 | -0.055  | 0.0138  | 0.3368  | 0.3942  | -0.006  |
| PY04955 | 1.2816  | 0.8053  | 0.681   | 0.2019  | -0.6648 | 0.5397  | 0.3538  | -0.0413 | 0.2629  | 0.079   | -0.6795 | -0.4116 |
| PY00798 | -0.4151 | -0.1261 | -0.148  | -1.396  | -0.5233 | -0.2664 | -0.1389 | 0.1659  | 0.0691  | -0.2055 | 0.5077  | -0.2467 |
| PY01247 | 0.3137  | 0.1712  | -0.4629 | -0.0102 | -0.4021 | 0.4515  | 0.2954  | 0.0558  | 0.1149  | 0.0155  | -0.4478 | 0.1705  |
| PY04346 | 0.271   | 0.4524  | 0.1112  | -0.5983 | -0.2203 | 0.1461  | 0.2413  | -0.4846 | 0.2027  | 0.1353  | 0.2818  | 0.1397  |
| PY03005 | -0.1147 | -0.3321 | 0.1766  | -0.3358 | 0.1111  | 0.3315  | 0.0659  | -0.1045 | 0.0827  | 0.0658  | -0.2221 | 0.4766  |
| PY00836 | 0.6198  | 0.1763  | -0.3291 | 0.2399  | 0.5132  | 0.3663  | -0.1441 | 0.0741  | -0.6932 | 0.1767  | -0.3022 | -0.5057 |
| PY00654 | 0.2803  | 0.1953  | -0.3266 | 0.6044  | 0.1988  | -0.2814 | -0.3565 | 0.1548  | -0.1697 | 0.3103  | -0.1118 | -0.2016 |
| PY04387 | 0.0328  | 0.0841  | 0.631   | -0.0916 | 0.0552  | -0.0126 | -0.0849 | -0.1077 | 0.2183  | -0.4421 | -0.076  | 0.4084  |
| PY00111 | -0.9187 | 0.17    | 0.4561  | 0.1584  | 0.6314  | 0.6993  | 0.2479  | 0.2295  | 0.004   | -0.3618 | 0.2833  | -0.5855 |
| PY05691 | 0.0229  | -0.0491 | 0.252   | -0.3486 | -0.3154 | -0.2156 | -0.2896 | -0.1403 | 0.0669  | 0.1658  | 0.2121  | 0.1143  |
| PY00590 | -0.9655 | -0.2144 | -0.28   | 0.2262  | -0.107  | -0.1327 | -0.1988 | 0.1484  | -0.0111 | 0.2074  | -0.209  | -0.2234 |
| PY02241 | -0.1054 | -0.3508 | -0.463  | 0.4634  | 0.3698  | -0.0959 | -0.3816 | 0.1581  | -0.0418 | 0.7863  | -0.042  | -0.0239 |
| PY03832 | 0.5385  | 0.1342  | 0.0583  | 0.3115  | 0.1988  | 0.0143  | 0.0448  | -0.2383 | -0.0099 | 0.0461  | -0.2781 | 0.1105  |
| PY01296 | -0.2875 | -0.2201 | -0.1732 | -0.3181 | -0.0551 | -0.2888 | -0.167  | -0.1143 | 0.3617  | -0.2026 | 0.4072  | 0.4772  |
| PY06520 | -0.9206 | -0.3687 | -0.3886 | -0.2732 | 0.0679  | -0.098  | 0.1572  | 0.3841  | -0.0136 | 0.0291  | 0.6155  | -0.328  |
| PY02654 | -0.8002 | -0.1407 | -0.0217 | -0.0701 | -0.8812 | -0.1187 | -0.0066 | 0.1727  | 0.2021  | -0.181  | 0.0994  | -0.0413 |
| PY03826 | 0.2614  | -0.0021 | 0.2199  | -0.4312 | -0.2941 | -0.071  | -0.2    | 0.0859  | 0.0051  | -0.678  | -0.3869 | -0.2933 |
| PY01941 | -0.1299 | -0.2712 | -0.0419 | 0.0427  | -0.1937 | 0.1305  | -0.4822 | 0.0699  | 0.0923  | 0.2962  | -0.3846 | 0.005   |
| PY02790 | 0.0614  | 0.2406  | 0.2339  | 0.4912  | 0.1093  | -0.0864 | 0.1352  | -0.1131 | 0.0903  | -0.4802 | -0.1604 | 0.1201  |
| PY02856 | -0.6263 | -0.4532 | -0.3488 | 1.3053  | 0.6343  | 0.6573  | 0.0847  | 0.6991  | 0.2011  | 0.7935  | 1.1599  | 0.0325  |
| PY05303 | -0.9358 | -0.3104 | 0.278   | -0.3793 | -0.1228 | -0.0764 | -0.0472 | 0.0746  | -0.0321 | -0.0753 | 0.2407  | -0.3624 |
| PY03015 | -0.2629 | 0.1376  | -0.0978 | -0.1425 | -0.0453 | -0.1397 | -0.0053 | 0.0062  | 0.2077  | -0.2493 | -0.4343 | -0.2152 |
| PY02268 | 0.1999  | -0.2425 | -0.3155 | -0.2937 | -0.0121 | -0.1204 | -0.2192 | -0.1584 | 0.123   | 0.1658  | 0.1907  | 0.1659  |
| PY07138 | 0.0573  | 0.2445  | -0.4686 | -0.2496 | 0.2779  | 0.1155  | -0.1553 | -0.1924 | 0.2395  | 0.1984  | 0.1006  | 0.2483  |
| PY04149 | -0.2998 | 0.331   | 0.2321  | -0.1139 | -0.2831 | -0.4148 | -0.0452 | 0.0431  | 0.0773  | 0.0455  | 0.8372  | 0.053   |
| PY03780 | 0.6816  | 0.6906  | 1.0014  | 0.3185  | -0.4048 | -0.1103 | 0.0921  | -0.4916 | -0.1452 | -0.1014 | -1.0453 | 0.1079  |
| PY05295 | -0.2309 | -0.0149 | -0.2023 | -0.1282 | -0.0207 | 0.2088  | -0.042  | -0.2105 | -0.2201 | -0.4404 | -0.3094 | -0.0676 |
| PY02339 | -1.3432 | -0.9875 | -0.0728 | -0.3115 | -0.047  | -0.2346 | -0.0958 | 0.3956  | 0.3377  | 0.4631  | 0.7876  | -0.5553 |
| PY02088 | -0.3622 | -0.016  | 0.1591  | 0.2605  | 0.2102  | -0.0721 | -0.0173 | 0.0653  | 0.0785  | 0.2277  | 0.0133  | -0.1751 |
| PY03704 | 0.6349  | 0.5452  | 0.7329  | 0.3914  | -0.1124 | 0.3946  | 0.3421  | -0.031  | 0.1599  | -0.1479 | -0.2494 | -0.1565 |
| PY03382 | -0.5494 | -0.427  | -0.3157 | 0.4339  | 0.2445  | 0.2897  | 0.0728  | 0.8188  | 0.5644  | 0.5883  | 1.0046  | 0.0485  |
| PY01751 | 0.212   | 0.2745  | 0.6964  | 0.3443  | -0.0925 | -0.0873 | 0.0614  | 0.0557  | 0.2941  | 0.0116  | 0.0283  | 0.3801  |
| PY05156 | -0.0605 | 0.0547  | -0.1305 | 0.1113  | -0.0968 | -0.1537 | -0.2081 | -0.0884 | -0.1996 | -0.6458 | -0.3239 | -0.189  |
| PY00445 | -0.2458 | -0.2052 | 0.0269  | -0.2315 | -0.3155 | -0.1632 | 0.0706  | 0.1581  | 0.1422  | -0.2011 | 0.2773  | 0.1006  |
| PY00965 | -0.1284 | -0.3322 | -0.2942 | -0.0629 | 0.1237  | 0.0087  | 0.2824  | 0.0448  | 0.212   | -0.0524 | 0.228   | 0.0679  |
| PY01149 | -0.5158 | 0.0382  | -0.0589 | 0.0521  | -0.2315 | -0.232  | 0.0671  | 0.1349  | 0.438   | 0.5525  | 0.4824  | 0.5282  |
| PY07229 | -1.1939 | -0.5708 | -0.5263 | -0.7676 | -0.5985 | -0.3545 | -0.0919 | 0.4658  | 0.0543  | 0.1515  | 0.3868  | -0.2292 |
| PY00695 | 0.5036  | 0.174   | 0.3134  | 0.1253  | -0.0106 | -0.003  | -0.2905 | 0.0395  | -0.0096 | -0.0292 | 0.209   | 0.2432  |
| PY02269 | 0.2907  | -0.007  | -0.0492 | -0.2039 | -0.1587 | 0.1017  | 0.1007  | -0.0401 | 0.0724  | -0.1019 | -0.1875 | 0.3176  |
| PY06577 | 0.0342  | -0.1275 | -0.1768 | -0.247  | -0.0041 | -0.1291 | -0.055  | 0.1331  | 0.0637  | 0.0366  | 0.3841  | -0.0219 |
| PY04662 | -0.1763 | 0.3426  | 0.1947  | -0.0901 | -0.1346 | -0.2432 | -0.0057 | 0.0365  | 0.0755  | 0.2889  | 0.4985  | 0.3228  |

|         |         |         |         |         |         |          |         |         |         |         |         |         |
|---------|---------|---------|---------|---------|---------|----------|---------|---------|---------|---------|---------|---------|
| PY06530 | 0.0325  | 0.1863  | 0.391   | -0.0613 | 0.1931  | -0.0478  | -0.0373 | -0.0731 | -0.0741 | -0.0744 | 0.3048  | -0.1179 |
| PY00465 | -0.1133 | -0.0028 | 0.1884  | 0.2868  | 0.0119  | 0.1983   | 0.0424  | -0.1635 | -0.3458 | 0.0312  | -0.2072 | 0.0417  |
| PY07596 | 0.1161  | 0.1202  | -0.1367 | -0.1588 | 0.1743  | -0.0694  | -0.0751 | 0.0354  | 0.0316  | 0.299   | 0.0566  | 0.2454  |
| PY03703 | 0.7078  | 0.5221  | 0.0243  | -0.2083 | 0.2115  | -0.0932  | -0.3131 | -0.1697 | -0.1956 | -0.374  | 0.136   | -0.5917 |
| PY04796 | 0.139   | -0.0166 | -0.1776 | -0.0155 | -0.2147 | -0.05717 | -0.4953 | -0.3635 | -0.3158 | 0.0661  | 0.0266  | -0.1514 |
| PY06372 | 0.2179  | 0.136   | 0.0929  | -0.2887 | -0.2291 | -0.057   | 0.171   | -0.448  | 0.2337  | -0.3127 | -0.2994 | 0.2895  |
| PY06820 | 0.907   | 0.498   | 0.1893  | 0.0099  | -0.0636 | 0.003    | 0.3753  | -0.0571 | 0.353   | -0.1363 | -0.4305 | 0.3521  |
| PY06600 | 0.1937  | -0.0538 | 0.3998  | -0.325  | -0.4461 | -0.3482  | 0.2057  | -0.1264 | -0.2528 | -0.1259 | 0.0836  | 0.934   |
| PY06626 | -0.2657 | 0.1198  | 0.0781  | -0.1    | -0.2177 | -0.0741  | 0.1165  | -0.0502 | 0.109   | 0.0443  | 0.2558  | 0.0158  |
| PY04329 | -0.1301 | -0.3544 | 0.0985  | 0.0035  | -0.3658 | -0.2797  | -0.1269 | 0.1111  | 0.452   | 0.6432  | -0.1119 | 0.8039  |
| PY04723 | 0.0476  | -0.0825 | -0.02   | 0.0136  | -0.5214 | -0.1045  | -0.1598 | -0.1518 | -0.0842 | 0.1043  | -0.1913 | 0.3119  |
| PY02863 | -0.1987 | 0.3106  | -0.1225 | -0.5083 | -0.3563 | -0.1532  | 0.389   | 0.4979  | 0.2301  | 0.2793  | 0.282   | 0.3466  |
| PY01712 | -0.2328 | -0.2744 | -0.1287 | -0.1694 | -0.1621 | -0.0014  | -0.0495 | -0.0016 | -0.0495 | -0.4292 | 0.0249  | 0.057   |
| PY01266 | -0.3274 | -0.2964 | -0.0273 | -0.1149 | 0.3117  | -0.1279  | -0.0645 | -0.2235 | -0.2443 | -0.1902 | 0.2591  | 0.0351  |
| PY04422 | -0.9002 | -0.4301 | -0.5014 | 0.1848  | 0.0514  | -0.1819  | -0.3446 | -0.1137 | -0.288  | -0.1638 | 0.1555  | -0.054  |
| PY03521 | -0.8458 | -0.105  | 0.0885  | -0.7714 | -0.1348 | -0.045   | -0.002  | -0.2609 | 0.0441  | -0.349  | 0.1442  | -0.0383 |
| PY00861 | -0.845  | -0.7936 | -0.4803 | 0.1549  | 0.304   | 0.2275   | 0.1588  | 0.1645  | -0.1107 | 0.2544  | 0.2905  | -0.0602 |
| PY02213 | -0.1884 | 0.0182  | 0.2159  | 0.0649  | 0.0741  | 0.0618   | -0.1009 | -0.0836 | -0.2507 | 0.2014  | -0.0397 | 0.061   |
| PY05258 | -0.029  | 0.0253  | 0.1679  | 0.0485  | -0.2053 | 0.1269   | 0.0674  | -0.2876 | 0.2934  | 0.0268  | -0.2102 | 0.1072  |
| PY04873 | 1.1152  | 0.6973  | 0.3488  | 0.5602  | -0.8076 | -0.2355  | -0.4088 | -0.7458 | -0.2021 | -0.3728 | -0.7912 | -0.2197 |
| PY01106 | 0.4471  | 0.2863  | 0.1638  | 0.0132  | -0.1174 | 0.058    | -0.0598 | -0.1313 | -0.2614 | 0.1668  | -0.08   | 0.0368  |
| PY05972 | 0.1294  | 0.2803  | -0.4468 | -0.6815 | -0.744  | -0.288   | -0.045  | 0.2254  | 0.0159  | 0.1468  | -0.0461 | -0.0474 |
| PY05451 | -0.3213 | 0.1546  | -0.0248 | 0.609   | 0.5367  | 0.2828   | -0.178  | 0.2674  | -1.0115 | 2.2564  | 0.5876  | -0.0011 |
| PY04525 | -0.1852 | -0.155  | -0.4971 | -0.1697 | -0.2823 | 0.3873   | 0.3135  | 0.2647  | 0.211   | -0.0325 | -0.0355 | -0.1527 |
| PY02551 | -0.1463 | -1.391  | 0.1005  | -0.5681 | -0.4621 | -0.132   | 0.2035  | 0.1127  | 0.1186  | -0.0063 | 0.2635  | 0.0656  |
| PY06653 | 0.3873  | -0.0593 | -0.0995 | 0.0295  | -0.0818 | 0.179    | -0.1112 | -0.066  | -0.1085 | 0.0498  | -0.427  | 0.2411  |
| PY05844 | -0.1956 | 0.1706  | -0.123  | -0.4295 | -0.0547 | 0.0053   | 0.2454  | 0.1195  | 0.0758  | 0.0697  | 0.1125  | 0.209   |
| PY00288 | -0.176  | -0.3941 | -0.1661 | 0.5568  | -0.1463 | 0.0162   | 0.1041  | 0.3044  | 0.2451  | 0.6195  | 0.9083  | 0.2591  |
| PY00140 | -0.7933 | -0.3612 | 0.2338  | -0.5444 | 0.066   | -0.0299  | -0.1447 | -0.0937 | -0.26   | -0.2007 | 0.1085  | -0.2536 |
| PY07006 | 0.4065  | -0.4081 | -0.744  | 0.5321  | 0.307   | 0.1407   | -0.3986 | 0.0028  | -0.3609 | 0.1977  | -0.2678 | 0.2604  |
| PY00799 | -0.407  | -0.0345 | -0.5149 | -0.3083 | -0.0681 | -0.2913  | -0.1309 | 0.0468  | 0.2283  | -0.0795 | 0.2638  | -0.4974 |
| PY00583 | 0.0406  | -0.3116 | -0.6464 | -1.3298 | -0.2634 | -0.2899  | -0.2755 | -0.558  | -0.3712 | -0.9546 | -0.7365 | 0.1817  |
| PY00128 | 0.0804  | -0.3575 | -0.0903 | 0.5164  | 0.2576  | 0.3598   | -0.0171 | 0.0516  | 0.1796  | 0.4603  | 0.2196  | 0.1957  |
| PY04265 | 0.1346  | 0.0893  | 0.0868  | 0.1273  | -0.1723 | -0.2319  | 0.039   | -0.3541 | 0.0904  | -0.0725 | 0.1758  | 0.3778  |
| PY00506 | -0.3718 | -0.238  | -0.2663 | -0.4117 | -0.7576 | -0.1352  | -0.295  | -0.0534 | -0.0226 | 0.1739  | -0.4772 | -0.0374 |
| PY02626 | -0.2349 | -0.0891 | -0.149  | 0.0073  | 0.5376  | 0.1568   | -0.1032 | -0.0388 | -0.1431 | -0.2153 | 0.2485  | -0.0721 |
| PY04983 | 0.0484  | 0.2689  | 0.4542  | -0.007  | -0.4084 | -0.362   | -0.1994 | -0.1835 | -0.1058 | -0.2309 | -0.6419 | -0.3051 |
| PY06157 | -1.1966 | 0.3004  | 0.6279  | -0.543  | -0.8544 | -0.4843  | -0.4675 | -0.177  | 0.1541  | -0.1552 | 0.4269  | 0       |
| PY06908 | -0.7081 | -0.0308 | 0.265   | -0.1185 | 0.0533  | 0.1674   | 0.1857  | -0.0235 | 0.0073  | -0.2661 | 0.0487  | -0.1369 |
| PY01598 | 0.0473  | -0.014  | -0.0289 | -0.3142 | -0.139  | -0.0478  | 0.1591  | -0.4026 | 0.1377  | -0.6114 | 2.2695  | 0.1331  |
| PY04715 | -0.1055 | 0.0072  | -0.4018 | -0.3037 | -0.572  | -0.3207  | -0.3172 | 0.4008  | -0.1294 | -0.5671 | -0.0681 | -0.5784 |
| PY05287 | -0.1956 | -0.1374 | -0.0467 | -0.2334 | -0.0471 | 0.0158   | -0.0009 | 0.0453  | 0.297   | -0.1092 | 0.0922  | -0.0739 |
| PY01463 | 0.3114  | 0       | -0.1438 | -0.0256 | 0.2946  | 0.0244   | -0.3362 | -0.3572 | -0.3302 | -0.0787 | -0.7255 | -0.0664 |
| PY01270 | -0.5214 | -0.2334 | -0.0706 | 0.2251  | 0.2489  | 0.1175   | 0.1396  | 0.4277  | -0.0504 | 0.1012  | 0.171   | -0.5921 |
| PY02464 | -0.5293 | -0.4557 | -0.4664 | -0.1408 | 0.5089  | 0.3035   | -0.0387 | 0.0812  | -0.1719 | 0.3115  | 0.2068  | 0.1233  |
| PY06972 | 0.395   | 0.3827  | 0.3329  | -0.0535 | 0.2628  | -0.1358  | -0.1957 | -0.5162 | -0.3119 | -0.6842 | -0.387  | -0.3742 |
| PY03272 | 0.3781  | 0.0534  | 0.0603  | 0.5394  | -0.0671 | -0.0217  | -0.2365 | -0.0515 | -0.6563 | -0.1632 | -0.5198 | -0.5873 |
| PY02531 | -0.3761 | 0.0979  | 0.0921  | 0.2565  | -0.1368 | -0.2372  | -0.1126 | 0.3033  | 0.0738  | -0.3043 | 0.07    | 0.151   |
| PY05775 | -0.8516 | -0.2615 | -0.172  | -0.153  | 0.3226  | 0.6349   | 0.5917  | 0.5806  | 0.1418  | -0.1503 | 0.1708  | -0.2834 |
| PY03964 | 0.3593  | -0.0065 | -0.0805 | -0.103  | 0.1189  | -0.1336  | -0.0738 | 0.0005  | -0.0127 | 0.1666  | 0.4049  | -0.0798 |
| PY01422 | -0.9703 | -0.0624 | 0.1167  | -0.3942 | -0.0859 | 0.0179   | -0.0515 | 0.2724  | 0.2389  | 0.1947  | 0.6954  | -0.0602 |
| PY02857 | 0.1577  | 0.2797  | 0.3397  | 0.1016  | 0.1587  | 0.1978   | 0.1535  | 0.4306  | 0.3474  | 0.304   | 0.7833  | 0.2567  |
| PY04711 | -0.1268 | 0.7307  | -0.3149 | -0.9956 | -0.4437 | -0.156   | -0.1034 | -0.0032 | -0.1706 | -0.1692 | -0.5869 | -0.7511 |
| PY00703 | 0.556   | 0.1769  | 0.5334  | 0.2387  | 0.1459  | 0.1902   | 0.3221  | -0.2993 | 0.1131  | -0.2758 | -0.4667 | -0.0425 |
| PY05057 | -0.0215 | -0.0271 | 0.1421  | -0.4256 | -0.4883 | -0.75    | -0.4621 | -0.189  | -0.0837 | 0.1315  | 0.2211  | -0.0011 |
| PY02403 | -0.6353 | -0.4528 | -0.3535 | -0.2844 | 0.1671  | 0.1067   | -0.0064 | 0.3787  | -0.1334 | 0.0962  | 0.675   | -0.1903 |
| PY00953 | -0.1026 | -0.0969 | 0.0356  | -1.1134 | 0.05    | -0.0263  | -0.0178 | -0.968  | -0.3545 | -1.3736 | -0.8757 | -0.0656 |
| PY00223 | -0.3361 | -0.3523 | -0.343  | 0.1677  | 0.5253  | -0.0236  | -0.1798 | 0.0905  | -0.1448 | 0.5899  | 1.0038  | 0.2045  |
| PY01746 | -0.8568 | -0.525  | -0.8027 | -0.648  | 0.0339  | 0.2615   | 0.0654  | -0.0928 | -0.4624 | 0.1024  | 0.3186  | -0.294  |
| PY01939 | -0.0944 | -0.1515 | -0.2115 | -0.3792 | 0.3773  | -0.2175  | -0.2878 | -0.5128 | -0.6918 | -0.3308 | -0.2667 | -0.5606 |
| PY05177 | 0.3495  | 0.087   | -0.2954 | 0.424   | 0.0989  | 0.0911   | 0.0909  | 0.2166  | 0.0459  | 0.176   | 0.1094  | -0.0826 |
| PY06214 | -0.4868 | -0.1168 | -0.2075 | 0.4741  | -0.154  | -0.0914  | 0.0395  | -0.0495 | 0.0155  | -0.4561 | 0.656   | 0.0107  |
| PY00694 | 0.157   | 0.2124  | -0.2079 | -0.435  | -0.7347 | -0.5783  | -0.1924 | -0.2346 | 0.0281  | -0.0713 | -0.1272 | -0.0702 |

|         |         |         |         |         |         |         |         |         |         |         |         |         |
|---------|---------|---------|---------|---------|---------|---------|---------|---------|---------|---------|---------|---------|
| PY05097 | -1.2631 | -0.4964 | -0.4483 | -1.149  | -1.737  | 0.0573  | 0.1352  | 0.6274  | 0.5244  | -0.0063 | -0.2126 | -0.0585 |
| PY02192 | -0.4886 | -0.1201 | 0.1011  | 0.2227  | 0.0057  | -0.0379 | 0.041   | -0.0089 | 0.0428  | 0.1225  | 0.055   | 0.1597  |
| PY06403 | 0.1486  | 0.3441  | 0.3891  | 0.4567  | 0.0996  | 0.0613  | 0.2893  | 0.2319  | 0.2288  | 0.0294  | 0.0583  | 0.1236  |
| PY01792 | 0.2604  | -0.1746 | -0.3871 | 0.0927  | 0.292   | -0.1314 | -0.2941 | -0.2982 | -0.414  | 0.0222  | -0.1823 | -0.0559 |
| PY02792 | 0.294   | -0.215  | 0.2636  | -0.0023 | -0.0881 | 0.2008  | 0.4754  | -0.1018 | 0.1965  | 0.3973  | -0.4219 | 0.2077  |
| PY01794 | 1.2089  | 0.6289  | 0.8355  | -0.1991 | -0.3526 | -0.0979 | 0.2966  | -0.5287 | 0.046   | -0.6885 | -0.9334 | 0.1676  |
| PY01089 | -0.8698 | -0.1496 | -0.1953 | -0.3524 | -0.7027 | -0.0021 | 0.0651  | 0.0923  | 0.0503  | -0.2545 | 0.0002  | -0.1118 |
| PY04157 | 0.4887  | 0.3889  | 0.1224  | 0.0348  | 0.4162  | -0.013  | 0.1628  | -0.1406 | -0.0701 | -0.1629 | 0.0453  | 0.0496  |
| PY00757 | -0.2836 | -0.4847 | -0.1364 | 0.6948  | 0.3435  | 0.1804  | -0.2582 | 0.2067  | -0.213  | -0.2132 | 0.3012  | 0.1218  |
| PY02680 | 0.0985  | 0.3631  | 0.3594  | 1.823   | -0.2817 | -0.0348 | -0.0831 | 0.1653  | -0.0747 | -0.0841 | -0.2387 | -0.3295 |
| PY02097 | 0.7866  | 0.8372  | 0.9953  | 0.2801  | -0.5701 | 0.2772  | 0.3734  | -0.3455 | 0.0076  | -0.6956 | -1.1938 | 0.0892  |
| PY02800 | -0.4533 | -0.1536 | -0.703  | 0.3181  | 0.3083  | -0.0137 | -0.3373 | 0.0035  | -0.3858 | -0.2806 | 0.3237  | -0.2525 |
| PY00189 | -0.135  | -0.2055 | -0.4467 | -0.0716 | -0.2413 | -0.3372 | -0.3642 | -0.0995 | 0.124   | 0.3005  | -0.0367 | 0.0707  |
| PY02070 | -0.3978 | -0.4831 | -0.3849 | 0.3499  | 0.4534  | 0.22    | -0.0106 | 0.067   | -0.3353 | 0.099   | 0.4717  | 0.0496  |
| PY03864 | 0.4625  | 0.0712  | -0.1564 | -0.0977 | -0.1366 | 0.0064  | -0.0041 | #####   | 0.2251  | 0.2113  | -0.1893 | 0.4764  |
| PY04563 | -0.3318 | 0.0194  | -0.3101 | 0.2437  | -0.0178 | -0.4254 | 0.2404  | 0.8113  | 0.4673  | 0.442   | 0.6378  | 0.149   |
| PY03306 | -0.179  | -0.0041 | 0.2525  | 0.6319  | -0.1109 | 0.0303  | 0.2451  | 0.4858  | 0.5291  | 0.731   | 0.0047  | 0.231   |
| PY06412 | 0.3333  | 0.2616  | -0.4598 | -0.2248 | -0.7142 | 0.3421  | 0.066   | 0.1217  | 0.1838  | 0.2948  | -0.3656 | 0.3055  |
| PY05980 | -0.1795 | 0.0077  | -0.0296 | -0.7226 | 0.1447  | 0.2418  | 0.5695  | 0.0445  | 0.0226  | 0.0011  | -0.2482 | 0.2199  |
| PY05205 | 0.0979  | 0.2292  | 0.6489  | 0.127   | -0.3177 | -0.0429 | 0.4161  | 0.3009  | 0.7828  | 0.362   | -0.2949 | 0.7236  |
| PY03117 | -0.2257 | -0.0697 | -0.1914 | 0.6314  | 0.4521  | 0.2629  | 0.0146  | -0.1492 | -0.1843 | 0.2493  | -0.1944 | 0.1482  |
| PY03312 | -0.1729 | -0.1808 | -0.0843 | -0.6638 | -0.468  | -0.4104 | 0.0301  | 0.0039  | 0.0039  | -0.2863 | -0.041  | 0.4628  |
| PY05455 | 0.0596  | -0.2816 | -0.6455 | -0.1982 | 0.0595  | -0.1371 | -0.0878 | 0.1763  | -0.1889 | 0.0276  | 0.0674  | -0.2479 |
| PY02865 | -1.3018 | 0.0253  | 0.1973  | -0.3324 | -0.6912 | -0.2125 | 0.0765  | 0.3856  | 0.0873  | -0.2592 | 0.1168  | -0.1606 |
| PY02997 | 0.2972  | 0.0303  | -0.0162 | 0.1179  | 0.1331  | -0.331  | 0.0741  | 0.1686  | -0.0884 | -0.9494 | -0.198  | -0.1465 |
| PY01608 | 0.0676  | -0.2525 | -0.0118 | -0.0101 | 0.0225  | 0.1487  | -0.0991 | -0.1782 | 0.1741  | 0.0264  | -0.1986 | 0.2245  |
| PY00824 | 0.1899  | -0.0342 | -0.421  | -0.1084 | 0.2576  | -0.0039 | 0.1826  | -0.1754 | -0.4893 | -0.2301 | 0.126   | 0.1417  |
| PY02160 | -0.3751 | -0.254  | -0.0484 | -0.0334 | -0.1129 | 0.6981  | 0.0576  | -0.1054 | -0.1055 | 0.0272  | 0.5333  | -0.0904 |
| PY06455 | -0.6884 | -0.3074 | 0.1747  | -0.0731 | -0.4034 | 0.0159  | 0.5907  | 0.4841  | 0.2678  | -0.1576 | 0.2641  | 0.0797  |
| PY07045 | 0.7623  | 0.7419  | -0.1813 | 0.0623  | 0.1719  | -0.1239 | -0.076  | -0.0994 | -0.074  | 0.0046  | 0.0786  | -0.1248 |
| PY03130 | -0.0398 | -0.0414 | 0.0223  | 0.0677  | -0.2732 | -0.1921 | 0.0272  | -0.136  | 0.1075  | 0.5914  | 0.1381  | 0.1832  |
| PY05664 | -0.4606 | -0.2474 | -0.1811 | 0.0222  | 0.4316  | 0.4381  | 0.0737  | -0.0419 | -0.1564 | 0.2389  | 0.0837  | -0.3016 |
| PY01355 | 0.0993  | -0.2291 | -0.5706 | -0.15   | 0.1631  | 0.0543  | -0.0202 | -0.2039 | -0.1924 | -0.5302 | -0.2535 | -0.0208 |
| PY02079 | 0.0635  | 0.0585  | -0.4025 | 0.333   | 0.0564  | 0.3864  | -0.0341 | -0.1765 | -0.3159 | 0.0891  | -0.3017 | -0.1342 |
| PY00303 | 0.3455  | 0.0624  | -0.0018 | -0.1179 | -0.2652 | -0.0228 | 0.0242  | -0.2818 | -0.1862 | 0.3507  | -0.0216 | -0.3242 |
| PY00675 | -0.27   | -0.0581 | 0.1746  | 0.8633  | 0.1252  | -0.0861 | -0.1331 | 0.4432  | -0.147  | 0.7362  | 0.7646  | -0.1038 |
| PY01166 | 0.006   | -0.1143 | -0.0002 | -0.7562 | -0.3511 | -0.2714 | -0.0166 | -0.1745 | 0.084   | -0.4384 | -0.5068 | 0.222   |
| PY03239 | 0.5381  | 0.25    | 0.3392  | 0.4725  | 0.2133  | 0.1881  | 0.1848  | -0.0198 | -0.0176 | 0.1116  | 0.0631  | 0.1938  |
| PY04075 | -0.4634 | -0.4066 | -0.362  | 0.073   | 0.8208  | -0.1339 | -0.3294 | -0.0471 | -0.1333 | -0.0068 | 0.1925  | -0.1239 |
| PY06119 | -0.3339 | -0.2216 | -0.9529 | 0.3818  | 0.455   | -0.2318 | -0.2159 | 0.4495  | -0.0957 | 0.4261  | 0.3583  | -0.0198 |
| PY05952 | -0.2978 | -0.2079 | -0.1524 | -0.1486 | 0.0959  | -0.0014 | 0.0853  | -0.0562 | -0.0065 | 0.2125  | -0.2749 | 0.1153  |
| PY03137 | 0.2886  | 0.0793  | 0.0145  | -0.066  | -0.0603 | -0.0121 | -0.0814 | -0.1093 | -0.0308 | -0.1372 | 0.0823  | 0.1007  |
| PY03932 | 0.25    | 0.112   | 0.2093  | 0.4925  | 0.3341  | -0.1667 | -0.2311 | -0.3526 | -0.1372 | -0.3525 | -0.2124 | -0.1912 |
| PY02495 | 0.2043  | 0.2625  | 0.1494  | -0.1918 | 0.1046  | 0.0859  | -0.4108 | -0.0378 | -0.3799 | -0.1257 | -0.3809 | -0.7319 |
| PY04606 | -0.6835 | -0.2702 | -0.4694 | -0.3326 | -0.3815 | -0.5144 | -0.1365 | 0.2547  | 0.2273  | 0.5021  | 0.9499  | 0.2285  |
| PY03480 | 0.8291  | 0.2974  | 0.1882  | 0.2807  | 0.2392  | -0.0365 | 0.0693  | 0.1887  | -0.1631 | 0.0468  | -0.3751 | 0.0371  |
| PY03102 | 0.1282  | -0.0255 | -0.1442 | 0.0636  | -0.1811 | -0.0788 | -0.2347 | 0.0319  | 0.2042  | 0.3621  | 0.3185  | 0.5806  |
| PY01867 | -0.0433 | 0.0177  | 0.1316  | -1.0068 | -0.5723 | 0.1877  | 0.4807  | -0.269  | 0.3098  | -0.5255 | -0.5239 | -0.046  |
| PY06112 | -0.408  | -0.1087 | -0.1709 | 0.307   | 0.7334  | 0.3123  | -0.1103 | 0.2201  | -0.2927 | 0.2714  | -0.0444 | -0.325  |
| PY02999 | -0.2838 | -0.2081 | -0.2841 | 0.405   | 0.2259  | 0.0217  | 0.1209  | 0.3237  | 0.0276  | 0.1432  | 0.2984  | 0.2812  |
| PY03711 | 1.0254  | 0.8254  | 0.729   | 0.6419  | -0.4393 | 0.161   | 0.2124  | -0.2738 | 0.086   | -0.1116 | -1.1214 | 0.0692  |
| PY03605 | -0.4123 | -0.0618 | -0.4538 | -0.2668 | -0.1294 | -0.0757 | -0.2166 | 0.0023  | -0.1905 | 0.0213  | -0.1841 | -0.0856 |
| PY02881 | -0.8658 | -0.2205 | 0.0512  | -0.1986 | -0.0356 | -0.183  | -0.2258 | 0.035   | -0.1963 | 0.3418  | 0.1302  | -0.4689 |
| PY04557 | 0.0246  | 0.1804  | -0.1525 | -0.4874 | -0.2787 | -0.283  | 0.0855  | 0.2756  | 0.1972  | 0.4438  | 0.0052  | 0.3781  |
| PY05388 | -0.2069 | -0.1216 | -0.1161 | -0.1418 | -0.0921 | -0.1324 | -0.0554 | -0.1154 | 0.0633  | 0.116   | -0.0826 | 0.0833  |
| PY02349 | -0.2612 | -0.8096 | -0.2125 | 0.1058  | 0.1934  | 0.0693  | -0.1078 | -0.1504 | -0.4594 | 0.4414  | -0.1148 | 0.0766  |
| PY06560 | 0.5784  | 0.2346  | 0.3205  | 0.1173  | -0.0852 | -0.1078 | 0.0269  | -0.2711 | 0.1262  | -0.866  | -0.3706 | 0.2628  |
| PY04095 | 1.129   | 0.4433  | 0.2948  | 0.5027  | 0.316   | 0.3673  | 0.0032  | -0.3236 | 0.0802  | -0.0955 | -0.0077 | 0.1054  |
| PY07642 | -0.3489 | -0.0732 | -0.0847 | -0.3339 | 0.4172  | -0.134  | -0.2041 | -0.1627 | -0.336  | -0.0475 | 0.133   | -0.1135 |
| PY00077 | 0.4219  | -0.0254 | -0.2622 | -0.437  | 0.0422  | 0.2252  | 0.2467  | -0.3263 | 0.1586  | 0.1637  | 0.0153  | 0.4375  |
| PY00241 | -0.4126 | -0.2389 | -0.3937 | -0.3749 | 0.2794  | -0.3205 | -0.1042 | -0.6388 | -0.3776 | -0.5667 | -0.295  | -0.1095 |
| PY04952 | -0.6837 | -0.1439 | -0.237  | 0.1842  | 0.2388  | -0.16   | -0.1535 | 0.081   | 0.2662  | -0.1145 | 0.0375  | -0.7296 |
| PY02640 | 0.5342  | 0.0184  | 0.2224  | -0.2678 | 0.1053  | 0.2925  | -0.0515 | -0.446  | -0.1137 | -0.3861 | -0.0686 | -0.6056 |

|         |         |         |         |         |         |         |         |         |         |         |         |         |
|---------|---------|---------|---------|---------|---------|---------|---------|---------|---------|---------|---------|---------|
| PY03290 | 0.9081  | 0.2169  | -0.2878 | 0.1055  | 1.8283  | 0.0716  | 0.0945  | -0.1155 | -0.0566 | 0.0189  | -0.2697 | -0.0298 |
| PY02340 | 0.1381  | 0.0078  | 0.2163  | -0.427  | 0.1724  | -0.0797 | 0.3402  | 0.1232  | 0.4193  | -0.1555 | 0.2274  | 0.3457  |
| PY03882 | 0.9929  | 0.7221  | -0.0512 | 0.4644  | 0.1927  | 0.1887  | 0.2637  | -0.0996 | 0.0655  | -0.0945 | -0.3115 | 0.07    |
| PY05555 | 0.602   | -0.0754 | -0.1656 | 0.1323  | 0.3904  | -0.093  | -0.2355 | -0.3435 | -0.3045 | -0.0811 | -0.4533 | 0.0217  |
| PY03425 | -0.562  | -0.0878 | 0.4377  | 0.4256  | 0.2317  | 0.277   | 0.1873  | 0.1497  | 0.2599  | 0.518   | 0.3327  | 0.0492  |
| PY06874 | 0.4162  | -0.0351 | -0.1798 | 0.2676  | 0.2319  | 0.1904  | 0.0485  | 0.1142  | -0.0671 | -0.6685 | 0.2066  | 0.4378  |
| PY01892 | 0.0131  | 0.1262  | 0.0146  | -0.3373 | -0.1497 | -0.2939 | -0.2173 | -0.2587 | -0.212  | -0.5276 | 0.4073  | -0.1872 |
| PY02311 | 0.1514  | -0.1838 | -0.5411 | -0.3517 | 0.0917  | -0.0115 | -0.3181 | -0.014  | -0.3246 | -0.254  | -0.2193 | -0.504  |
| PY01123 | -0.472  | -0.3346 | -0.0102 | -0.3904 | -0.0854 | 0.1376  | -0.0048 | -0.104  | -0.2151 | 0.3451  | 0.0547  | -0.1913 |
| PY03664 | 0.7995  | 0.5828  | 0.5765  | 0.1752  | 0.2985  | 0.0748  | 0.1505  | -0.027  | 0.1652  | -0.233  | -0.8293 | -0.5659 |
| PY00070 | -0.8465 | -0.0037 | 0.3341  | -0.0392 | -0.0815 | 0.2284  | -0.1043 | 0.0908  | 0.1701  | -0.0434 | -0.0552 | -0.1394 |
| PY07168 | 0.5677  | 0.3789  | 0.3571  | 0.2518  | -0.0255 | 0.2135  | 0.1517  | 0.1431  | -0.0535 | 0.1282  | 0.1065  | 0.1953  |
| PY05959 | 0.1852  | 0.1497  | 0.2867  | -0.1492 | 0.1768  | -0.0481 | 0.1993  | -0.2174 | -0.0278 | -0.4778 | -0.0012 | -1.0392 |
| PY01092 | -0.2458 | -0.043  | 0.0942  | 0.0109  | -0.1173 | -0.1323 | -0.3071 | 0.0064  | 0.0013  | 0.2381  | 0.52    | -0.364  |
| PY06544 | 0.2984  | 0.0623  | 0.0081  | 0.5384  | 0.3455  | 0.0809  | 0.0353  | -0.0728 | 0.0321  | -0.4422 | -0.1179 | 0.1098  |
| PY04990 | -1.0042 | -0.241  | 0.1515  | 0.3062  | 0.0894  | 0.1447  | -0.28   | 0.0957  | -0.3316 | -0.1359 | 0.1829  | -0.5519 |
| PY06724 | -0.0629 | 0.1532  | -0.2962 | -0.5357 | -0.5915 | -0.1339 | 0.3143  | 0.3016  | 0.4243  | 0.0002  | -0.1006 | 0.2999  |
| PY02990 | -0.3061 | 0.0012  | -0.1185 | -0.0928 | 0.2266  | 0.092   | -0.0395 | -0.0633 | -0.2105 | 0.2535  | 0.1775  | -0.2032 |
| PY02781 | 0.2181  | 0.29    | 0.3422  | -0.2197 | -0.2612 | -0.2066 | 0.0069  | -0.1896 | 0.0057  | -0.5284 | -0.3293 | 0.0564  |
| PY00331 | -0.0286 | 0.0374  | 0.1628  | -0.1069 | 0.1123  | -0.0223 | 0.1528  | -0.0303 | 0.2198  | 0.1903  | -0.0297 | 0.1903  |
| PY00275 | 0.1439  | 0.9703  | 1.0413  | -0.0102 | -0.6771 | 0.5983  | 0.8631  | -0.062  | 0.2453  | -0.8017 | -0.7437 | -0.1324 |
| PY06420 | -0.9203 | -0.2059 | 0.1863  | -0.3938 | -0.6025 | -0.5471 | -0.5405 | -0.1755 | -0.0507 | 0.017   | 0.2795  | -0.1484 |
| PY06191 | 1.0386  | 0.8168  | 0.9497  | -0.0488 | -0.3432 | 0.1641  | 0.4363  | -0.375  | 0.1148  | -0.2105 | -0.8396 | 0.2296  |
| PY01868 | 0.4835  | 0.2859  | 0.011   | 0.5202  | 0.2722  | 0.1365  | 0.0422  | -0.0373 | -0.2327 | 0.0992  | 0.0992  | 0.1006  |
| PY03301 | 0.3536  | 0.2253  | -0.0224 | 0.2444  | 0.3404  | -0.028  | -0.3151 | -0.4525 | -0.4561 | -0.0924 | -0.4321 | -0.3369 |
| PY06774 | -0.0175 | -0.0157 | 0.1623  | -0.5348 | -0.0652 | -0.1668 | -0.0226 | -0.1363 | 0.0952  | 0.1293  | 0.0788  | 0.1225  |
| PY07335 | -0.4205 | -0.1409 | -0.0138 | -0.4243 | 0.0052  | -0.2567 | -0.17   | -0.1253 | -0.1646 | 0.0383  | 0.4981  | -0.2198 |
| PY00130 | 0.4178  | 0.2316  | 0.7319  | 0.8011  | 0.257   | -0.013  | -0.2092 | -0.3131 | -0.5803 | -0.2245 | -0.8849 | -0.6726 |
| PY04030 | -0.1075 | -0.5107 | -0.1236 | -0.4172 | 0.2184  | -0.2973 | 0.2865  | 0.2145  | 0.2274  | -0.1632 | -0.0494 | -0.0491 |
| PY03799 | 0.1472  | -0.0312 | 0.2488  | -0.1681 | -0.5657 | -0.209  | -0.1535 | -0.1865 | 0.1546  | -0.1852 | 0.3537  | 0.1713  |
| PY00233 | -1.0659 | -0.1249 | 0.3182  | -0.4162 | -0.9036 | 0.1695  | 0.5692  | 0.7964  | 0.4618  | 0.1015  | 0       | -0.0081 |
| PY01391 | 0.5423  | 0.5166  | 0.7564  | 0.6432  | -0.1526 | -0.1528 | -0.0477 | -0.3552 | 0.0026  | -0.1539 | -0.5804 | -0.2715 |
| PY07827 | 0.2818  | 0.1656  | -0.1394 | 0.5286  | 0.1011  | 0.0913  | 0.2592  | 0.34    | 0.3476  | 0.0135  | 0.344   | 0.2264  |
| PY06711 | 0.5151  | 0.2829  | -0.651  | -0.1221 | 0.2698  | -0.4736 | -0.1153 | -0.0741 | -0.1368 | -0.2088 | 0.0148  | -0.4698 |
| PY01059 | -0.1659 | -0.8279 | -0.8569 | -0.3954 | 0.3879  | 0.0233  | 0.2384  | -0.2785 | -0.2077 | 0.16    | 0.1453  | 0.7428  |
| PY00134 | -0.2461 | -0.155  | -0.2644 | -0.584  | 0.243   | -0.124  | -0.3612 | -0.2266 | 0.0709  | 0.02    | 0.0155  | 0.1367  |
| PY04596 | -0.3453 | 0.0902  | 0.0586  | -0.2182 | -0.1302 | 0.2799  | 0.2746  | 0.4046  | 0.2537  | -0.0302 | -0.3117 | 0.1722  |
| PY04619 | 0.0018  | -0.1281 | 0.0156  | 0.0303  | 0.2631  | 0.0013  | -0.0617 | 0.0489  | 0.0302  | 0.111   | 0.0093  | 0.2826  |
| PY03686 | 0.21    | 0.1844  | -0.1244 | 0.6499  | -0.2386 | 0.0614  | -0.168  | -0.0351 | 0.0029  | 0.115   | -0.119  | -0.0323 |
| PY02885 | 0.2315  | 0.0823  | -0.0663 | 0.5986  | 0.4473  | -0.112  | -0.1323 | -0.2309 | -0.3804 | 0.2034  | -0.2512 | -0.0804 |
| PY02436 | -0.1098 | -0.0627 | 0.0425  | -0.3818 | -0.0005 | 0.1286  | 0.2329  | 0.0712  | 0.0441  | 0.0896  | -0.048  | -0.0375 |
| PY05851 | 0.1956  | -0.1288 | 0.0079  | 0.319   | 0.0343  | 0.2014  | -0.0481 | 0.4049  | 0.1564  | -0.2173 | 0.515   | 0.1695  |
| PY02087 | -0.6182 | 0.2429  | 0.7562  | 0.3404  | -0.3148 | -0.1356 | 0.2519  | 0.1775  | 0.5071  | -0.5165 | 0.2833  | 0.2564  |
| PY01971 | 0.0128  | 0.0087  | 0.0225  | 0.1775  | 0.0809  | -0.0328 | -0.0462 | 0.2067  | -0.0986 | 0.4776  | 0.4406  | 0.024   |
| PY04697 | 0.3073  | 0.0885  | 0.103   | 0.3939  | 0.0025  | -0.0295 | -0.0824 | -0.1973 | -0.0211 | -0.3071 | -0.1611 | 0.3334  |
| PY02744 | 0.1817  | 0.1788  | 0.1637  | -0.0168 | 0.3465  | 0.0039  | -0.0014 | 0.0424  | -0.0329 | -0.1463 | 0.3204  | -0.0119 |
| PY01665 | -0.2931 | 0.2801  | 0.3047  | 0.4136  | 0.0414  | 0.2195  | -0.0172 | -0.0026 | -0.5351 | -0.5457 | -0.0107 | -0.4218 |
| PY02742 | 0.1433  | -0.1488 | 0.1276  | 0.8014  | 0.561   | 0.1874  | -0.0847 | 0.0795  | -0.0144 | -0.1356 | 0.5669  | -0.0408 |
| PY02093 | -0.3561 | -0.055  | 0.1168  | -0.1046 | 0.0203  | -0.14   | -0.1745 | 0.0582  | 0.0644  | 0.125   | -0.3195 | 0.1287  |
| PY05941 | -0.3895 | -0.3325 | -0.4558 | 0.1706  | 0.5678  | 0.0972  | -0.1358 | 0.1557  | 0.0206  | 0.3771  | 0.5328  | 0.052   |
| PY05217 | -0.2122 | -0.2142 | -0.0959 | -0.2398 | -0.0328 | -0.1449 | -0.2798 | -0.1091 | -0.4473 | 0.0681  | 0.0785  | 0.0063  |
| PY05993 | -0.1094 | -0.1948 | -0.4809 | -0.2142 | 0.2231  | -0.0996 | -0.2388 | 0.0755  | -0.1646 | 0.0607  | 0.7618  | -0.0428 |
| PY05365 | 0.2795  | 0.093   | -0.2701 | 0.0012  | 0.0049  | -0.2099 | -0.3567 | -0.1252 | -1.2431 | -0.2055 | -0.4799 | -0.0141 |
| PY07296 | -0.2117 | -0.2463 | -0.1278 | -0.2659 | 0.1056  | -0.3203 | -0.0325 | -0.2573 | -0.1844 | -0.0878 | -0.1671 | 0.3143  |
| PY01239 | 0.0573  | 0.0723  | -0.0904 | 0.1178  | -0.0078 | 0.2174  | 0.0741  | -0.0017 | 0.1798  | -0.1124 | -0.2533 | 0.0257  |
| PY03518 | 0.4218  | 0.0731  | -0.249  | -0.6211 | -0.0663 | -0.0536 | -0.0711 | -0.3115 | -0.0994 | -0.4949 | -0.395  | 0.1796  |
| PY00916 | 0.4492  | 0.0545  | 0.1669  | 0.3196  | -0.0071 | -0.0625 | -0.0135 | -0.0508 | -0.0405 | -0.1147 | -0.0831 | 0.0062  |
| PY03074 | 0.3532  | 0.198   | 0.2937  | 0.0388  | 0.2585  | -0.2293 | -0.0009 | -0.2252 | -0.5771 | 0.0019  | -0.5016 | 0.3133  |
| PY02102 | -0.3599 | -0.1156 | -0.3096 | -0.4543 | 0.0962  | -0.0896 | -0.0817 | -0.0686 | -0.2323 | -0.1108 | 0.1166  | -0.07   |
| PY04043 | -0.3523 | -0.2388 | -0.5011 | -0.731  | -0.0555 | -0.1841 | -0.0782 | 0.0649  | 0.0443  | -0.098  | 0.1123  | -0.2998 |
| PY02208 | 0.1972  | 0.4425  | 0.4609  | -0.0635 | -0.2126 | -0.2208 | -0.3215 | 0.0576  | -0.2315 | -0.2303 | -0.182  | -0.5296 |
| PY04062 | 0.4973  | 0.0696  | 0.3211  | 0.196   | 0.172   | -0.0171 | -0.0455 | 0.0356  | 0.0386  | -0.1961 | 0.4522  | -0.0244 |
| PY04884 | -0.755  | -0.2222 | -0.1785 | -1.2496 | -0.1684 | -0.2645 | -0.2654 | -0.0236 | 0.0394  | -0.0698 | 0.2748  | -0.1494 |

|         |         |         |         |         |         |         |         |         |         |         |         |         |
|---------|---------|---------|---------|---------|---------|---------|---------|---------|---------|---------|---------|---------|
| PY06279 | 0.1351  | -0.1865 | -0.3543 | -0.1242 | -0.1053 | -0.0452 | -0.043  | -0.1131 | -0.4709 | -0.6795 | -0.1694 | -0.308  |
| PY01309 | -0.1761 | -0.3057 | -0.3886 | 0.6041  | 0.6525  | 0.1966  | -0.3051 | -0.157  | 0.0099  | 0.0122  | -0.4799 | 0.0499  |
| PY00715 | -0.4327 | 0.236   | 0.2282  | -0.0136 | -0.7975 | -0.1796 | 0.0188  | -0.0749 | 0.2931  | 0.0628  | -0.1248 | 0.4056  |
| PY01653 | 0.0727  | 0.0513  | -0.1171 | -0.091  | -0.0093 | -0.2877 | -0.2233 | -0.1777 | -0.3633 | -0.3611 | -0.0521 | 0.004   |
| PY01407 | -0.2048 | -0.0531 | -0.0327 | 0.0544  | -0.6828 | 0.0563  | -0.0593 | -0.0226 | 0.0328  | -0.1932 | -0.5287 | -0.3742 |
| PY03150 | -0.1029 | -0.0018 | -0.1703 | 0.1698  | 0.2857  | -0.153  | -0.2933 | -0.2044 | -0.319  | -0.1171 | 0.1606  | -0.2105 |
| PY02122 | -0.3811 | 0.138   | 0.3347  | -0.5046 | -0.0415 | -0.1562 | -0.1378 | 0.1178  | 0.0646  | 0.3349  | 0.332   | 0.2633  |
| PY04381 | -0.3295 | -0.1361 | -0.1524 | 0.4229  | 1.3139  | -0.0939 | -0.0089 | -0.2602 | -0.6865 | 0.0087  | -0.3096 | -0.048  |
| PY00812 | -0.0464 | 0.0646  | -0.0235 | 0.0834  | -0.1279 | -0.2792 | -0.0948 | -0.4102 | -0.3777 | -0.2714 | -0.0099 | -0.037  |
| PY03764 | 0.5971  | -0.207  | -0.3107 | 0.6096  | 0.0567  | 0.2504  | 0.046   | 0.0699  | 0.064   | 0.3455  | -0.2092 | 0.1848  |
| PY05947 | -0.2194 | -0.0016 | 0.0658  | -0.1748 | -0.6253 | -0.4386 | -0.4176 | -0.0978 | -0.1396 | 0.0155  | -0.1353 | -0.3089 |
| PY00548 | 0.0482  | -0.156  | -0.0181 | 0.4833  | 0.1014  | 0.3347  | 0.1222  | 0.0014  | -0.0492 | 0.396   | 0.1057  | 0.0862  |
| PY02032 | -1.2277 | -0.3481 | 0.0688  | -0.0438 | -0.328  | 0.3212  | -0.0654 | 0.2959  | 0.0643  | 0.2557  | -0.0044 | -0.3194 |
| PY01362 | -0.6416 | -0.1807 | 0.3097  | -0.0439 | -0.3804 | -0.0188 | -0.1205 | 0.0427  | 0.1449  | 0.0175  | 0.2068  | 0.0817  |
| PY02173 | 0.6573  | 0.5203  | 0.7851  | -0.5923 | -0.2955 | -0.0583 | 0.081   | -0.6975 | -0.0229 | -0.5429 | -0.714  | -0.0132 |
| PY00463 | -0.4713 | -0.4108 | -0.2405 | -0.242  | 0.5217  | 0.0539  | -0.0629 | 0.0426  | -0.3808 | -0.1702 | 0.109   | -0.2404 |
| PY01433 | -1.1958 | -1.431  | -0.9953 | -0.7244 | 0.1928  | -0.0071 | 0.0233  | 0.2673  | 0.3614  | 0.0772  | 0.4724  | -0.1551 |
| PY07681 | 0.1526  | 0.1382  | 0.0052  | 0.1335  | 0.1557  | -0.1094 | 0.1786  | 0.0035  | 0.2465  | -0.256  | 0.1456  | 0.3407  |
| PY00537 | 0.6568  | 0.0776  | 0.3258  | -0.0515 | 0.3553  | 0.3739  | -0.1049 | -0.1293 | -0.0574 | -0.0497 | -0.3895 | 0.1855  |
| PY01600 | -0.5944 | -0.4635 | -0.3175 | -0.3557 | -0.0268 | 0.2693  | -0.1157 | -0.0835 | 0.2393  | -0.1448 | 0.2394  | 0.5943  |
| PY00665 | -0.2238 | 0.0655  | 0.1947  | 0.0435  | 0.4033  | -0.052  | -0.0264 | -0.1061 | -0.0435 | -0.0455 | 0.2398  | -0.0948 |
| PY02598 | -0.2394 | 0.3971  | -0.1497 | -0.1255 | -0.2735 | 0.0502  | 0.0675  | 0.2834  | 0.1175  | -0.1889 | 0.7444  | -0.0764 |
| PY05899 | -0.7137 | -0.2656 | -0.0337 | -0.579  | -0.7541 | -0.6222 | -0.4538 | 0.1974  | 0.0513  | 0.0905  | 0.574   | -0.1215 |
| PY00295 | 0.0258  | 0.0535  | 0.177   | -0.8594 | 0.1419  | -0.0177 | -0.0691 | -0.6438 | -0.277  | -0.5559 | -0.5047 | 0.1821  |
| PY04868 | 0.435   | 0.0321  | 0.0847  | -0.6068 | -0.1117 | -0.1728 | 0.1023  | -0.2249 | 0.1275  | -0.6718 | -0.5319 | 0.0761  |
| PY00859 | -0.171  | -0.1602 | -0.4717 | -0.3696 | -0.8225 | -0.8425 | -0.1152 | 0.189   | 0.1988  | -0.3394 | 0.7243  | -0.0288 |
| PY02981 | -0.1954 | -0.7687 | -0.6836 | -0.1552 | -0.6624 | -0.3937 | -0.0797 | 0.2072  | 0.3041  | 0.3481  | 0.5817  | 0.6617  |
| PY02233 | -0.7713 | -0.5069 | -0.2723 | -0.3039 | -0.3453 | -0.311  | -0.3818 | 0.015   | 0.324   | -0.0567 | 0.2116  | -0.045  |
| PY02221 | -0.1191 | -0.1103 | -0.1513 | 0.3324  | -0.262  | 0.0738  | 0.0105  | 0.0869  | -0.0073 | 0.0213  | -0.5281 | 0.0083  |
| PY01691 | 0.3212  | 0.2025  | -0.4194 | -0.1838 | 0.224   | -0.0959 | 0.1092  | 0.0561  | -0.1482 | 0.0971  | -0.0136 | 0.2703  |
| PY06445 | 0.5075  | 0.2444  | 0.3932  | 0.6462  | 0.4465  | 0.1702  | 0.3013  | 0.2122  | 0.2289  | 0.2292  | 0.1371  | 0.4464  |
| PY07267 | -0.2517 | 0.3294  | 0.4773  | 0.3807  | -0.0415 | -0.0734 | 0.0367  | 0.0265  | 0.2348  | 0.31    | 0.2353  | 0.5596  |
| PY04024 | 0.6703  | 0.225   | 0.2827  | 0.2458  | 0.2069  | 0.2144  | 0.1273  | -0.2528 | -0.307  | -0.2098 | -0.224  | -0.024  |
| PY01922 | 0.6088  | 0.0398  | -0.0009 | 0.372   | -0.0988 | 0.1413  | 0.1356  | 0.286   | 0.2367  | 0.5525  | 0.001   | 0.3339  |
| PY05500 | 0.0289  | 0.0599  | 0.0506  | -0.1363 | 0.1691  | 0.2963  | 0.1901  | -0.0125 | -0.2953 | 0.0291  | 0.1067  | -0.5991 |
| PY05115 | -0.3291 | -0.2155 | -0.1479 | 1.0441  | 0.5991  | 0.6111  | -0.1453 | 0.4641  | -0.1601 | 0.8524  | 0.8067  | 0.2136  |
| PY02694 | -0.5367 | -0.018  | -0.4608 | 0.1648  | -0.3836 | -0.1306 | -0.1262 | -0.0106 | 0.2087  | -0.018  | -0.1687 | -0.2637 |
| PY00875 | -0.0747 | 0.1183  | 0.0429  | 0.6469  | 0.3714  | 0.0535  | -0.136  | 0.234   | -0.0741 | 0.7039  | 0.9314  | -0.1853 |
| PY07401 | -0.264  | -0.2075 | -0.1238 | -0.2791 | -0.533  | 0.0948  | 0.0974  | -0.0712 | -0.0765 | -0.0006 | -0.1641 | -0.4119 |
| PY05616 | 0.4252  | 0.5428  | 0.5846  | 0.6767  | 0.2884  | 0.4585  | 0.1598  | 0.0175  | -0.111  | 0.4176  | -0.1078 | -0.005  |
| PY06005 | 0.1355  | -0.0789 | -0.047  | 0.2945  | 0.1749  | 0.0528  | -0.1452 | -0.0722 | -0.0693 | 0.0418  | -0.0369 | 0.2951  |
| PY00058 | -0.3615 | -0.4833 | -0.4642 | -0.368  | -0.5533 | -0.5578 | -0.4935 | -0.2448 | -0.8192 | -0.3465 | -0.7068 | -0.7491 |
| PY06553 | -0.3015 | -0.1004 | -0.1052 | -0.3387 | 0.1146  | -0.0701 | 0.2095  | 0.2834  | 0.1343  | 0.5387  | 1.9499  | 0.8246  |
| PY05754 | 0.3174  | -0.285  | -0.9109 | 0.8026  | 0.6741  | -0.024  | -0.48   | -0.2495 | -0.2409 | -0.1836 | -0.1705 | -0.3114 |
| PY05087 | 0.243   | 0.1532  | 0.1749  | -0.7745 | -0.0061 | -0.2484 | -0.0399 | -0.1776 | -0.1551 | -0.2777 | 0.0265  | 0.2636  |
| PY03232 | 0.0228  | -0.1893 | -0.0037 | 0.122   | 0.0332  | -0.0666 | 0.0231  | 0.1511  | -0.0746 | -0.0934 | -0.1823 | 0.0721  |
| PY07445 | 0.1475  | 0.2684  | 0.1638  | -0.4653 | -0.0608 | 0.2515  | 0.0027  | -0.2036 | -0.0678 | -0.0497 | -0.3258 | -0.1164 |
| PY02289 | 0.3265  | -0.0098 | -0.1589 | -0.1458 | -0.1922 | -0.1683 | -0.1282 | -0.2887 | -0.1769 | -0.2557 | -0.4181 | -0.0486 |
| PY07215 | 0.3651  | 0.2675  | 0.0489  | 0.3745  | 0.4563  | 0.0011  | -0.0671 | 0.1283  | 0.2204  | 0.4987  | 0.3778  | 0.2593  |
| PY02813 | -0.1471 | -0.1292 | 0.0789  | 0.7751  | 0.4544  | 0.3235  | 0.0559  | 0.1079  | 0.1935  | 0.505   | -0.0671 | 0.4256  |
| PY05461 | 0.0005  | 0.1582  | -0.2761 | 0.1109  | -0.2705 | -0.381  | -0.3086 | 0.0101  | -0.1375 | 0.015   | 0.1774  | -0.0989 |
| PY00561 | -0.3642 | -0.1959 | -0.0761 | -0.0808 | 0.2774  | 0.1014  | -0.0693 | -0.0159 | 0.1245  | 0.1064  | 0.1988  | 0.147   |
| PY05916 | -0.116  | 0.0358  | -0.0566 | 0.0703  | 0.2747  | 0.0999  | -0.054  | -0.1499 | -0.2884 | -0.2444 | -0.1866 | -0.1608 |
| PY05950 | -1.5863 | -0.7118 | -0.4528 | -1.0701 | -0.9383 | -0.3613 | 0.0247  | 0.7221  | 0.1622  | -0.195  | 0.5556  | -0.2117 |
| PY01029 | -0.7343 | -0.1368 | -0.5069 | 0.2195  | 0.4429  | 0.0171  | -0.1945 | 0.2843  | -0.0853 | 0.5251  | 0.2951  | -0.0553 |
| PY05877 | -0.4046 | 0.0957  | 0.2534  | 0.2189  | 0.3521  | -0.0065 | -0.1553 | 0.009   | -0.3336 | -0.1566 | 0.3889  | -0.3447 |
| PY04361 | -0.0341 | -0.2114 | -0.2138 | 0.6024  | 0.357   | 0.1222  | -0.151  | 0.0714  | -0.1446 | 0.5265  | 0.43    | -0.0077 |
| PY04549 | 0.0733  | -0.3029 | -0.0413 | 0.0946  | 0.1327  | 0.3516  | 0.213   | 0.1398  | 0.2863  | -0.7632 | -0.1784 | 0.0666  |
| PY01836 | 0.2875  | 0.0439  | -0.5277 | 0.0882  | -0.0551 | -0.3407 | -0.6348 | -0.1653 | -0.2844 | -0.0179 | -0.0873 | -0.3721 |
| PY01365 | 0.0901  | -0.0606 | 0.3919  | -0.0062 | -0.5113 | -0.2445 | 0.1842  | 0.2054  | 0.7427  | 0.0336  | -0.0457 | 0.6164  |
| PY01065 | 0.3002  | -0.0809 | -0.2622 | 0.2987  | 0.2307  | 0.076   | 0.2047  | 0.1817  | 0.3007  | 0.1039  | 0.0763  | 0.5051  |
| PY00039 | 0.1592  | 0.3653  | -0.4211 | -0.5897 | -0.0342 | 0.2606  | 1.1295  | 0.6259  | 0.9321  | -0.2176 | -0.2445 | 0.2618  |
| PY05572 | 0.1042  | 0.5001  | 0.6556  | -0.1704 | -0.3003 | -0.0014 | 0.4072  | -0.18   | 0.28    | -0.3019 | -0.2441 | 0.4348  |



|         |         |         |         |         |         |         |         |         |         |         |         |         |
|---------|---------|---------|---------|---------|---------|---------|---------|---------|---------|---------|---------|---------|
| PY00200 | -0.4564 | -0.1585 | 0.1894  | -0.3624 | -0.6265 | 0.0579  | 0.1929  | 0.5054  | 0.4769  | -0.2291 | -0.3067 | 0.1151  |
| PY02909 | -0.5536 | -0.0891 | -0.084  | -0.0559 | 0.2162  | 0.011   | -0.152  | 0.01    | -0.0748 | 0.3335  | 0.249   | 0.0382  |
| PY01901 | 0.3657  | 0.2657  | 0.187   | 0.1505  | -0.074  | -0.3672 | -0.1695 | -0.2136 | -0.0599 | -0.1677 | -0.2406 | -0.2817 |
| PY06929 | -0.3274 | 0.1431  | -0.2796 | -0.1685 | -0.0724 | 0.0196  | 0.0749  | 0.1735  | 0.7882  | -0.2209 | 0.464   | 0.4555  |
| PY02318 | 0.2895  | 0.0141  | 0.0241  | 0.1662  | -0.1205 | 0.0479  | 0.0416  | -0.0509 | 0.1234  | 0.165   | -0.4777 | 0.3632  |
| PY06053 | 0.1589  | 0.016   | 0.3468  | -0.6857 | -0.1741 | 0.0268  | -0.136  | -0.3537 | -0.1371 | -0.1846 | -0.1892 | 0.3045  |
| PY05789 | 0.0478  | -0.0352 | -0.2743 | -0.1182 | -0.4081 | 0.0395  | -0.0967 | -0.0702 | 0.102   | -0.2259 | -0.438  | 0.1035  |
| PY01625 | 0.0738  | 0.232   | -0.3861 | 0.1323  | 0.4635  | 0.2136  | -0.3148 | -0.2448 | -0.252  | -0.243  | -0.2877 | -0.2022 |
| PY02647 | 1.0636  | 0.608   | 0.9667  | 0.6039  | -0.4485 | 0.0895  | 0.4789  | -0.1783 | 0.2776  | 0.1717  | -1.0708 | 0.3193  |
| PY05737 | 0.3586  | -0.1134 | -0.2732 | 0.6486  | -0.0874 | 0.1284  | 0.1662  | 0.3164  | 0.4714  | -0.2312 | -0.4575 | 0.2023  |
| PY04446 | 0.3089  | -0.0576 | -0.0592 | 0.1481  | 0.1429  | 0.1616  | 0.186   | 0.0178  | 0.1614  | 0.3362  | 0.0963  | 0.343   |
| PY02854 | 0.3374  | 0.0132  | 0.0917  | 0.8665  | 0.3609  | 0.113   | -0.085  | 0.261   | -0.24   | -0.422  | -0.1342 | -0.2937 |
| PY01336 | -0.3416 | -0.1671 | 0.3533  | -0.423  | -0.4912 | -0.3084 | -0.1933 | -0.0299 | 0.121   | 0.1104  | -0.0265 | 0.1394  |
| PY03550 | -0.3503 | 0.0569  | 0.3211  | 0.0798  | -0.0785 | 0.0217  | -0.1945 | -0.0062 | -0.0418 | 0.131   | 0.2507  | -0.0809 |
| PY06348 | 0.1011  | -0.1676 | -0.0131 | -0.0526 | 0.5967  | 0.0761  | 0.0988  | -0.0975 | -0.073  | 0.0232  | -0.0983 | 0.3663  |
| PY00725 | -0.1625 | 0.1627  | 0.2488  | 0.4252  | -0.0567 | -0.3041 | -0.0535 | 0.2658  | 0.1403  | 0.4384  | -0.0352 | 0.0963  |
| PY05747 | -0.0824 | -0.1759 | -0.1679 | -0.5513 | -0.2819 | -0.1387 | 0.1186  | -0.0875 | -0.0148 | -0.01   | -0.4733 | -0.0298 |
| PY06584 | -0.5267 | 0.0363  | -0.1675 | 0.1742  | 0.3806  | 0.1858  | 0.0439  | 0.2206  | -0.1598 | 0.072   | 0.0762  | -0.402  |
| PY04583 | 0.0145  | 0.0026  | -0.0436 | 0.698   | 0.9989  | 0.3026  | -0.0941 | 0.2385  | 0.1257  | 0.6524  | 0.3269  | 0.0761  |
| PY06691 | 0.1453  | -0.0661 | 0.0494  | -0.22   | 0.0704  | -0.1118 | -0.0474 | -0.2632 | -0.1791 | -0.5234 | -0.0221 | -0.621  |
| PY03514 | 0.5484  | 0.1681  | 0.1231  | 0.2594  | -0.041  | -0.1657 | 0.0256  | -0.0167 | -0.3002 | 0.1535  | -0.1619 | 0.1429  |
| PY01802 | -0.1254 | 0.1688  | -0.0531 | 3.0599  | 0.0495  | -0.1341 | -0.4586 | 0.3796  | -0.2877 | -0.5744 | 0.3983  | -0.2025 |
| PY06868 | -0.0168 | -0.0654 | -0.0803 | -0.4166 | 0.2263  | 0.196   | 0.202   | -0.014  | -0.0264 | -0.1932 | 0.1472  | 0.3968  |
| PY05888 | -2.0967 | -0.5541 | -0.0582 | -1.3904 | -1.027  | -0.6866 | -0.2424 | 0.4528  | 0.2682  | -0.2684 | 0.826   | -0.6163 |
| PY01328 | 0.4429  | 0.0804  | -0.0054 | 0.2356  | 0.1819  | 0.023   | -0.2165 | 0.1562  | -0.6134 | 0.3727  | 0.3268  | -0.1762 |
| PY04138 | 0.3383  | 0.3809  | 0.4211  | -2.4706 | -1.4477 | -0.1191 | 0.1141  | -1.0994 | -0.0237 | -1.3657 | -1.5417 | 0.2846  |
| PY02870 | -0.7765 | -0.2388 | -0.1675 | 0.7428  | 0.8658  | 1.04    | -0.046  | 0.5692  | -0.0114 | 0.6507  | 0.9663  | 0.2151  |
| PY03513 | -0.301  | -0.3622 | -0.4773 | -0.1545 | 0.4731  | 0.2942  | -0.0071 | 0.1849  | -0.1092 | 0.303   | -0.1837 | -0.1033 |
| PY07662 | -0.1399 | 0.0611  | 0.0986  | 0.4358  | 0.1121  | -0.4943 | -0.1765 | -0.1336 | -0.1086 | 0.0277  | 0.7033  | -0.066  |
| PY03282 | 0.2357  | -0.0551 | -0.5233 | -0.0321 | 0.0737  | 0.0305  | -0.2014 | 0.0137  | -0.045  | 0.1622  | -0.3107 | 0.1302  |
| PY07149 | 0.2971  | 0.0718  | -0.1463 | -0.5906 | 0.0622  | -0.143  | 0.0525  | -0.2756 | -0.2675 | -0.3103 | -0.2261 | -0.1274 |
| PY05135 | 0.4634  | 0.3257  | 0.2735  | 0.0517  | 0.0993  | -0.0474 | 0.2153  | -0.1957 | 0.1613  | -0.2568 | -0.4223 | 0.1575  |
| PY00643 | 1.3912  | 0.8207  | 1.1215  | 0.2172  | 0.0074  | -0.1679 | 0.5677  | -0.4846 | 0.3736  | 0.3693  | -0.6456 | 0.6812  |
| PY04903 | 0.4983  | 0.2746  | 0.183   | -0.5223 | -0.1406 | -0.1552 | 0.0714  | -0.2084 | -0.0955 | -0.1386 | -0.3837 | 0.2851  |
| PY02900 | -0.3291 | 0.1782  | -0.0156 | 0.4839  | -0.1874 | -0.372  | 0.0884  | 0.4183  | 0.2574  | -0.2417 | -0.0697 | -0.3803 |
| PY01907 | 1.019   | 0.7362  | 1.159   | 0.2857  | -0.6312 | 0.1473  | 0.5221  | -0.4873 | 0.358   | -0.0561 | -0.8178 | 0.0682  |
| PY04323 | -0.5412 | 0.1206  | -0.0086 | -0.1155 | -0.3634 | -0.5213 | -0.1698 | -0.0951 | -0.2163 | 0.2149  | -0.3096 | -0.6692 |
| PY02167 | -0.6051 | -0.159  | 0.0879  | -0.1692 | -0.3812 | -0.5428 | 0.0266  | 0.2378  | 0.5076  | 0.1116  | 1.3204  | 0.5207  |
| PY03895 | 0.2689  | 0.045   | -0.1455 | 0.2519  | 0.0076  | 0.2337  | -0.0688 | 0.0883  | -0.0897 | 0.0491  | -0.1488 | 0.2402  |
| PY04404 | -0.113  | 0.0083  | 0.0218  | 0.1949  | -0.2052 | 0.1093  | -0.0212 | 0.2537  | 0.4205  | 0.3147  | -0.1999 | -0.3369 |
| PY01027 | -0.1491 | -0.1795 | -0.3062 | -0.1971 | -0.1972 | -0.3177 | 0.0526  | 0.1097  | 0.0417  | 0.2807  | 0.5334  | 0.1208  |
| PY04645 | -0.0222 | 0.0556  | -0.2123 | 0.3662  | 0.211   | -0.204  | -0.3819 | -0.1891 | -0.1858 | -0.148  | -0.1636 | -0.1291 |
| PY06198 | -0.0581 | -0.1413 | -0.0436 | -0.7791 | -0.0934 | 0.0001  | -0.2477 | -0.2468 | -0.2448 | -0.3415 | -0.5143 | -0.0911 |
| PY03140 | -0.0894 | 0.2138  | 0.1161  | -0.0336 | -0.2182 | -0.1689 | -0.0594 | -0.0101 | 0.1736  | -0.6537 | -0.232  | 0.2053  |
| PY05401 | -0.0988 | -0.1077 | -0.3606 | -0.204  | 0.2472  | -0.0676 | -0.3524 | -0.2322 | -0.3232 | -0.943  | -0.1403 | -0.5207 |
| PY06454 | -1.549  | -0.6142 | -0.2648 | -0.7647 | -0.7938 | 0.0223  | 0.1156  | 0.5638  | 0.2194  | -0.1791 | 0.4382  | -0.6514 |
| PY04829 | 0.2479  | 0.0214  | 0.0924  | 0.1589  | 0.0223  | -0.1512 | -0.3704 | -0.1794 | -0.298  | -0.2685 | -0.3961 | -0.2358 |
| PY04675 | 0.1363  | 0.2001  | 0.1195  | -0.1143 | -0.3099 | -0.2557 | 0.019   | -0.1737 | 0.1159  | 0.1347  | 0.0131  | 0.1896  |
| PY02294 | 0.4134  | 0.3071  | 0.2052  | -0.3991 | 0.0679  | 0.2185  | 0.2142  | -0.0294 | 0.1961  | -0.4118 | 0.0476  | 0.3295  |
| PY05721 | -0.2076 | -0.053  | 0.0746  | 0.0315  | 0.0461  | -0.2126 | -0.1073 | -0.1849 | 0.0189  | 0.0127  | 0.6652  | -0.0105 |
| PY04968 | 0.554   | 0.0642  | -0.308  | 0.185   | -0.0438 | -0.0193 | -0.0716 | -0.3068 | -0.0524 | -0.0908 | 0.2127  | -0.3375 |
| PY07502 | -0.3611 | 0.0097  | -0.1301 | 0.5707  | 0.4182  | 0.9676  | 0.0484  | 0.3263  | 0.1545  | 0.0676  | 0.3982  | -0.0104 |
| PY00208 | 0.4384  | 0.3564  | -0.0257 | 0.4726  | -0.1785 | -0.204  | 0.0403  | 0.4642  | 0.2999  | 0.6472  | 0.4432  | 0.2337  |
| PY07061 | 0.4051  | 0.1683  | 0.396   | 0.1887  | 0.2305  | -0.006  | 0.2614  | 0.141   | -0.1555 | -0.3032 | 0.0528  | 0.2631  |
| PY06317 | -0.6088 | -0.2829 | -0.1264 | -0.1382 | -0.1432 | -0.0984 | -0.1546 | -0.0068 | 0.1455  | -0.1843 | 0.0409  | -0.1845 |
| PY00700 | 0.5054  | 0.1037  | 0.3688  | -0.0855 | 0.031   | 0.1004  | -0.047  | -0.3407 | -0.0415 | -0.2645 | -0.2179 | -0.0592 |
| PY03395 | 0.1019  | 0.1441  | -0.1238 | -0.0409 | 0.0242  | 0.2311  | 0.2647  | 0.0215  | -0.1377 | -0.2683 | -0.3149 | -0.0215 |
| PY00096 | 0.4642  | 0.5585  | 0.6127  | 0.2934  | -0.365  | 0.3039  | 0.4475  | -0.0514 | 0.2888  | -0.1698 | -0.7972 | 0.1555  |
| PY04302 | -0.0697 | 0.1154  | 0.2376  | -0.5779 | -0.4681 | -0.3406 | 0.0587  | -0.499  | -0.014  | -0.7082 | -0.6911 | 0.1264  |
| PY02526 | -0.1187 | 0.1532  | -0.0438 | -0.3064 | -0.1256 | 0.2281  | 0.0161  | 0.0018  | -0.0854 | -0.3073 | -0.3628 | 0.0289  |
| PY05235 | 0.0217  | -0.1715 | -0.4552 | -0.568  | 0.077   | 0.1528  | 0.2126  | 0.2533  | 0.1185  | 0.0923  | 0.4397  | -0.2013 |
| PY06046 | -0.182  | -0.2122 | -0.2687 | -0.123  | -0.412  | 0.1713  | 0.2509  | 0.2185  | 0.2597  | 0.1336  | -0.0357 | 0.6183  |
| PY00012 | -0.4563 | -0.2543 | -0.1348 | -0.5758 | -0.1766 | 0.0799  | 0.5013  | 0.5006  | 0.5003  | -0.0195 | 0.2613  | -0.0035 |

|         |         |         |         |         |         |         |         |         |         |         |         |         |
|---------|---------|---------|---------|---------|---------|---------|---------|---------|---------|---------|---------|---------|
| PY01552 | 0.2129  | 0.0434  | -0.2257 | 0.1803  | 0.1841  | -0.0482 | 0.0478  | -0.2354 | 0.0123  | 0.1689  | -0.4081 | 0.1848  |
| PY05564 | 0.5135  | 0.2895  | 0.5049  | -0.4003 | -0.31   | 0.156   | 0.4039  | -0.2169 | 0.2552  | 0.0441  | -0.1406 | 0.3357  |
| PY03881 | 0.041   | 0.3283  | -0.2172 | 0.1695  | -0.03   | -0.1176 | -0.0899 | -0.0241 | -0.0002 | 0.0983  | -0.0292 | 0.1197  |
| PY02558 | 0.6741  | 0.2195  | -0.1313 | 0.7142  | 0.3787  | 0.303   | -0.0134 | -0.1416 | -0.298  | 0.0563  | 0.4228  | 0.1482  |
| PY04437 | 0.1464  | 0.1698  | 0.0592  | -0.0035 | -0.0535 | -0.0686 | 0.0973  | -0.2539 | -0.0944 | 0.0778  | -0.2301 | -0.0366 |
| PY05529 | 0.1593  | 0.0206  | -0.2264 | 1.0914  | 0.1963  | -0.0214 | -0.3375 | -0.0904 | -0.5321 | 0.3335  | 0.1413  | -0.4688 |
| PY01019 | -1.3337 | -0.3664 | 0.0087  | -0.7895 | -0.7777 | -0.1408 | 0.2201  | 0.8178  | 0.2318  | -0.4713 | -0.2513 | -0.8838 |
| PY03928 | 0.1767  | 0.0771  | -0.1794 | 0.3113  | -0.1778 | -0.1834 | -0.2875 | 0.1292  | 0.0511  | 0.2401  | -0.2285 | -0.0655 |
| PY07159 | -0.0496 | 0.2284  | 0.0522  | -0.1801 | -0.02   | -0.2206 | -0.0875 | -0.0987 | -0.0337 | -0.5416 | -0.0371 | -0.1776 |
| PY01316 | -0.3824 | -0.2054 | -0.3416 | 0.4939  | 0.2867  | 0.1155  | -0.0119 | 0.0512  | -0.0733 | -0.0339 | -0.0211 | -0.5073 |
| PY04492 | -0.5267 | 0.1133  | 0.1042  | -0.0189 | -0.1476 | -0.0286 | -0.1202 | -0.2998 | -0.0704 | -0.4543 | -0.5197 | -0.2804 |
| PY02965 | -0.2145 | 0.049   | -0.147  | -0.4449 | -0.569  | 0.066   | 0.3345  | 0.1176  | 0.5035  | 0.0981  | -0.1956 | 0.5319  |
| PY07275 | -0.5035 | -0.04   | -0.1379 | -0.1128 | -0.0394 | -0.0052 | -0.3094 | -0.1879 | -0.2595 | -0.0951 | -0.5078 | -0.2357 |
| PY06954 | -0.5555 | 0.0189  | 0.1906  | -0.0088 | -0.427  | -0.2949 | -0.0339 | 0.255   | 0.0496  | 0.2928  | 0.528   | 0.2433  |
| PY04820 | 0.1448  | 0.0643  | -0.0405 | -0.1308 | 0.3792  | -0.027  | -0.3961 | -0.2814 | -0.3284 | 0.0163  | -0.2844 | -0.022  |
| PY06084 | -0.3682 | -0.2689 | -0.158  | 0.2625  | 0.85    | 0.3952  | -0.0772 | -0.0766 | -0.3163 | 0.169   | 1.1025  | -0.0157 |
| PY06016 | 0.6562  | 0.1141  | 0.1535  | -0.2124 | -0.0732 | 0.2037  | 0.1956  | 0.0505  | 0.0748  | -0.267  | -0.7536 | 0.4134  |
| PY04901 | 0.6877  | 0.2326  | -0.723  | -0.1242 | 0.2011  | -0.0449 | -0.2705 | -0.0778 | -0.1941 | -0.1453 | -0.3023 | -0.5142 |
| PY00324 | -0.0675 | -0.3474 | -0.3672 | 0.5611  | 0.3061  | 0.6537  | 0.0515  | 0.2636  | -0.7117 | 0.8596  | 0.8883  | 0.4466  |
| PY03843 | -0.5704 | -0.1446 | 0.0187  | -0.1822 | 0.1212  | 0.2874  | 0.0157  | 0.0125  | -0.0809 | 0.1018  | -0.0589 | -0.5275 |
| PY07456 | -0.6278 | 0.2945  | 0.6277  | -0.3562 | -0.6704 | -0.1057 | 0.4095  | 0.5143  | 0.2868  | -0.2935 | 0.0855  | -0.1199 |
| PY07205 | 0.4677  | 0.0462  | 0.1148  | -0.2441 | -0.0081 | 0.161   | 0.3898  | -0.0903 | 0.2027  | -0.1423 | -0.3841 | 0.4305  |
| PY00168 | -0.8665 | 0.0643  | 0.1115  | -0.1168 | -0.2868 | -0.0121 | -0.0708 | 0.1046  | -0.154  | -0.1312 | -0.1035 | -0.3529 |
| PY00820 | -0.0881 | -0.0051 | -0.2474 | 0.1752  | 0.3403  | -0.0051 | -0.2059 | 0.0118  | -0.1351 | 0.1519  | 0.0393  | 0.2883  |
| PY04496 | 0.5119  | 0.2158  | -0.2409 | -0.0111 | -0.1346 | 0.4426  | 0.1135  | -0.0117 | 0.0446  | -0.1168 | -0.3257 | 0.0379  |
| PY06425 | -0.6691 | -0.9766 | -0.9651 | -0.2855 | 0.2068  | -0.1293 | -0.0078 | 0.3903  | 0.6491  | 0.2727  | 0.4838  | -0.2393 |
| PY05062 | -0.1544 | 0.0476  | -0.5104 | -0.754  | -0.0293 | -0.3474 | -0.6197 | -0.2309 | -0.3136 | -0.0042 | -0.165  | -0.448  |
| PY06903 | 0.3007  | 0.0713  | -0.2538 | 0.3394  | -0.0344 | -0.3488 | -0.5347 | -0.068  | -0.9359 | -0.1035 | 0.0078  | -0.2011 |
| PY05304 | -1.084  | -0.5596 | -0.4926 | -0.5764 | 0.0977  | 0.3096  | -0.1552 | 0.2246  | -0.0942 | 0.2023  | 0.1985  | -0.2249 |
| PY02460 | 0.3684  | 0.1635  | -0.3488 | -0.0853 | -0.1606 | 0.3529  | 0.3916  | 0.2261  | 0.2398  | 0.5568  | 1.9382  | 0.5775  |
| PY01198 | 0.1     | -0.0187 | 0.1438  | -0.0121 | 0.4903  | 0.0413  | -0.1541 | -0.1561 | -0.2414 | 0.1342  | 0.2762  | 0.0797  |
| PY05421 | -0.2756 | 0.0096  | 0.0557  | -0.5883 | -0.417  | 0.0089  | -0.4117 | 0.1314  | 0.2657  | 0.2604  | 0.1476  | 0.2071  |
| PY04641 | 0.6381  | 0.2339  | 0.3951  | 0.7026  | -0.1839 | -0.0514 | 0.0354  | -0.0651 | 0.199   | -0.2765 | -0.3385 | -0.1134 |
| PY01491 | -0.4404 | 0.0754  | 0.3136  | -0.263  | -0.5692 | -0.2968 | -0.0989 | 0.0117  | 0.002   | 0.2315  | 0.3082  | -0.1769 |
| PY03383 | -0.2443 | -0.0976 | 0.1076  | 0.3279  | 0.2437  | 0.0016  | -0.0507 | 0.37    | 0.089   | 0.1399  | 0.4734  | -0.005  |
| PY05232 | 1.4175  | 0.8454  | 0.8473  | 0.4071  | -0.1027 | 0.1951  | 0.8939  | -0.2336 | 0.3327  | -0.0745 | -0.1469 | 0.8153  |
| PY02181 | 0.1517  | 0.0257  | -0.0215 | 0.0346  | -0.1946 | -0.1671 | 0.1176  | -0.2362 | 0.0144  | -0.065  | -0.3022 | 0.4019  |
| PY00423 | 0.2159  | 0.1852  | -0.3888 | -0.5213 | -0.4124 | -0.2302 | -0.1424 | -0.2334 | -0.4404 | -0.9491 | -0.6101 | -0.6709 |
| PY04654 | -0.4917 | 0.1079  | -0.0282 | -0.1364 | -0.4722 | -0.4087 | -0.3009 | 0.2905  | -0.021  | -0.5727 | 0.4962  | -0.3628 |
| PY06463 | -0.3451 | -0.52   | -0.4021 | 0.6809  | -0.3519 | 0.0019  | 0.0106  | 0.3528  | -0.0592 | 0.0415  | 0.2413  | -0.1441 |
| PY02393 | 1.067   | 0.7815  | 0.962   | -0.0961 | -0.1689 | 0.2004  | 0.5261  | -0.129  | 0.5103  | -0.289  | -0.5721 | 0.509   |
| PY01569 | 0.1238  | 0.0882  | -0.1999 | 0.0208  | -0.6243 | -0.3565 | -0.075  | -0.1749 | -0.4193 | -0.127  | 0.3329  | 0.1049  |
| PY03143 | -0.2338 | -0.1461 | -0.188  | -0.3002 | 0.0758  | 0.3406  | 0.0958  | 0.2012  | -0.0565 | 0.1302  | -0.0507 | -0.2237 |
| PY03298 | 0.57    | 0.3854  | 0.0269  | 0.1885  | 0.229   | 1.1188  | 0.0557  | -0.0073 | -0.0309 | -0.3552 | 1.6411  | -0.1318 |
| PY04807 | 0.0293  | 0.0955  | 0.3943  | -0.0421 | 0.0152  | 0.0848  | -0.0157 | -0.1276 | -0.1272 | -0.4312 | -0.302  | 0.044   |
| PY03062 | -0.198  | 0.1791  | 0.4634  | -0.4742 | -0.627  | -0.4433 | 0.1833  | -0.1083 | 0.3663  | 0.3708  | 0.3619  | 0.3459  |
| PY05580 | 0.2517  | -0.2119 | 0.1401  | -0.3702 | 0.1357  | 0.0782  | -0.0263 | -0.1548 | -0.0192 | -0.3895 | -0.2117 | 0.1035  |
| PY02501 | -1.5719 | -0.5908 | -0.5614 | -0.4105 | -0.404  | -0.5239 | -0.234  | 0.3298  | 0.5986  | 0.5316  | 0.3255  | 0.0926  |
| PY07490 | 0.1955  | -0.1701 | -0.3294 | -0.329  | -0.0197 | -0.4015 | -0.0966 | -0.3869 | -0.2085 | -0.3863 | -0.2696 | 0.3763  |
| PY02622 | -0.2567 | -0.3473 | -0.0091 | 0.0688  | 0.6242  | 0.1168  | -0.1825 | -0.0692 | -0.2571 | 0.396   | 0.3142  | 0.1138  |
| PY03086 | -0.0183 | -0.0883 | -0.0609 | -0.2544 | 0.0231  | 0.24    | -0.0481 | 0.1117  | 0.2634  | -0.428  | -0.3853 | -0.2523 |
| PY05298 | -0.4082 | 0.0183  | -0.2338 | -0.029  | -0.0555 | -0.2965 | 0.0082  | -0.1601 | 0.0805  | 0.0085  | 0.3846  | 0.1455  |
| PY00686 | 0.0323  | 0.1655  | 0.283   | -0.6093 | -0.2207 | 0.1068  | 0.595   | 0.025   | 0.3647  | -0.1581 | -0.156  | 0.1241  |
| PY01750 | 0.7037  | 0.5498  | 0.7537  | 0.5687  | -0.0129 | 0.0117  | 0.1282  | 0.0073  | -0.0514 | 0.102   | -0.3061 | -0.1308 |
| PY07542 | -0.1188 | -0.2468 | 0.0388  | 0.0597  | 0.3393  | -0.0565 | -0.1706 | -0.2289 | -0.2087 | -0.156  | 0.0672  | -0.2655 |
| PY07257 | -0.339  | -0.4439 | -0.1817 | -0.4106 | 0.0621  | -0.024  | -0.0608 | 0.2937  | 0.0518  | -0.3272 | -0.1933 | -0.3803 |
| PY06147 | -0.2193 | 0.2483  | 0.178   | -0.5002 | -0.0758 | 0.1051  | 0.1001  | -0.2141 | 0.3221  | -0.2669 | -0.1119 | -0.3008 |
| PY00507 | -0.2477 | 0.207   | 0.609   | -0.0823 | -0.2193 | -0.0124 | 0.2496  | 0.1195  | 0.2588  | 0.1051  | -0.1159 | -0.0455 |
| PY03223 | 0.0068  | 0.1561  | 0.0732  | 0.4596  | 0.4937  | -0.0687 | -0.0383 | 0.1219  | 0.1741  | 0.3846  | 0.1361  | -0.9791 |
| PY00192 | 0.7726  | 0.3529  | 0.3938  | 0.4409  | 0.0176  | -0.2438 | -0.0339 | -0.3415 | -0.2985 | -0.0683 | -0.4485 | 0.1083  |
| PY05432 | 0.6262  | 0.325   | -0.1037 | 0.1237  | 0.0908  | 0.2408  | 0.0052  | -0.3691 | -0.331  | -0.1681 | -0.2172 | -0.5699 |
| PY03218 | -0.7825 | -0.4021 | -0.6125 | -0.1998 | -0.061  | -0.263  | -0.1853 | 0.1606  | -0.2209 | 0.183   | 0.2815  | 0.2773  |
| PY02034 | -0.228  | -0.2464 | -0.0797 | 0.1915  | 0.0236  | -0.0585 | -0.6289 | -0.0256 | -1.107  | 0.0914  | 0.1874  | -0.0231 |

|         |         |         |         |         |         |         |         |         |         |         |         |         |
|---------|---------|---------|---------|---------|---------|---------|---------|---------|---------|---------|---------|---------|
| PY07064 | -0.2179 | -0.8604 | -0.7393 | -0.4822 | -0.3801 | -0.1078 | -0.2157 | 0.1192  | 0.1246  | 0.1387  | -0.067  | 0.1077  |
| PY00596 | -0.5545 | -0.3171 | 0.1498  | -0.1765 | -0.1114 | -0.4072 | -0.5908 | -0.034  | 0.1206  | 0.5872  | 0.2033  | -0.2804 |
| PY05536 | -1.2594 | -0.6006 | -0.3198 | -0.3803 | 0.254   | 0.2199  | -0.0247 | 0.071   | -0.162  | 0.1388  | 0.2118  | -0.2471 |
| PY01254 | 0.0463  | -0.1064 | -0.1597 | -0.0046 | -0.2784 | -0.0695 | -0.1391 | -0.0007 | 0.0817  | -0.8964 | -0.1559 | 0.0182  |
| PY03607 | 0.5082  | 0.0291  | 0.1098  | 0.2702  | 0.1964  | 0.0005  | -0.1027 | -0.0788 | -0.2178 | -0.0789 | -0.3943 | 0.1272  |
| PY01601 | 0.3416  | 0.4306  | 0.5179  | 0.144   | -0.0777 | 0.3093  | 0.2823  | -0.0119 | -0.0032 | -0.2483 | -0.5455 | 0.0142  |
| PY02360 | 0.5129  | 0.4102  | 0.5657  | 0.4227  | -0.2972 | -0.0052 | -0.067  | -0.184  | 0.0822  | 0.0382  | -0.8131 | 0.1347  |
| PY00659 | 0.1639  | 0.1274  | -0.0367 | -0.1326 | -0.0895 | -0.0932 | -0.4795 | -0.4915 | -0.3017 | -0.3606 | -0.4259 | -0.5508 |
| PY05675 | 0.2354  | -0.0157 | -0.1763 | 0.632   | -0.0467 | 0.0255  | -0.1435 | -0.0567 | -0.0221 | 0.0066  | 0.18    | -0.0831 |
| PY00534 | -0.1582 | 0.0681  | -0.2083 | -0.227  | 0.0418  | 0.5435  | 0.138   | -0.1002 | -0.0241 | -0.2461 | -0.3351 | -0.0703 |
| PY02265 | -0.0942 | -0.0521 | 0.0554  | 4.176   | 3.6844  | 3.3097  | -0.5312 | 2.8441  | -0.0623 | 4.1508  | 3.5837  | 0.1101  |
| PY03123 | 0.8778  | 0.3453  | 0.5355  | -0.0608 | -0.2832 | 0.1052  | 0.5222  | -0.2766 | 0.2904  | -0.0587 | -0.7087 | 0.438   |
| PY05197 | 0.2121  | 0.4996  | 0.231   | 0.345   | -0.2018 | 0.1271  | 0.1732  | -0.0737 | 0.272   | 0.2578  | -0.1001 | 0.1172  |
| PY03334 | 0.246   | 0.0893  | 0.093   | -0.1385 | 0.3297  | -0.1239 | 0.0633  | -0.1179 | 0.0549  | -0.5663 | -0.0815 | 0.1247  |
| PY03004 | -0.1356 | -0.5211 | 0.0731  | 0.194   | 0.7274  | 0.2396  | 0.2604  | 0.2809  | 0.0592  | 0.4026  | 0.2169  | 0.6007  |
| PY05504 | -0.1745 | 0.3814  | 0.3795  | 0.1302  | -0.5617 | -0.4643 | -0.2301 | -0.2756 | 0.1022  | -0.9349 | -0.3231 | -0.0797 |
| PY04388 | 0.1061  | -0.0997 | 0.1249  | -0.0402 | -0.1479 | -0.0719 | 0.075   | 0.3528  | 0.3333  | 0.0066  | -0.4463 | -0.1321 |
| PY00471 | -0.5189 | -0.1266 | -0.1673 | -0.0521 | -0.2254 | 0.0516  | -0.1605 | -0.1392 | -0.1273 | 0.0868  | 0.1454  | -0.0517 |
| PY00037 | 0.0453  | -1.76   | -0.0758 | 1.178   | 0.2984  | 0.102   | -0.5238 | -0.2603 | -0.8376 | 0.4047  | 0.289   | -0.8659 |
| PY03069 | -1.2622 | -0.1331 | 0.4111  | 0.1528  | -0.8443 | -0.7239 | -0.1746 | 0.0332  | 0.0229  | 0.0529  | 0.6212  | -0.2308 |
| PY00209 | -0.7254 | -0.5301 | -0.8606 | 0.6646  | -0.2592 | -0.0222 | -0.1397 | -1.2071 | -2.5006 | 0.7868  | -0.028  | -0.6679 |
| PY01742 | 0.5141  | 0.002   | -0.675  | 0.1342  | -0.096  | -0.337  | -0.4026 | -0.0713 | -0.3332 | -0.3107 | 0.1348  | -0.5399 |
| PY02719 | -0.1893 | 0.0832  | 0.23    | -0.1798 | 0.1553  | -0.321  | -0.3042 | -0.1461 | -0.1813 | 0.0822  | 0.2042  | -0.2562 |
| PY06255 | -0.7657 | 0.0597  | -0.1718 | -0.2322 | -0.0975 | -0.0375 | 0.1768  | 0.4916  | 0.2851  | 0.1251  | 0.7019  | -0.2698 |
| PY02326 | 0.3174  | 0.2876  | 0.2701  | 0.0897  | 0.0516  | -0.0217 | -0.1843 | -0.1915 | -0.1658 | 0.0478  | -0.4762 | 0.0166  |
| PY05621 | -0.3291 | 0.1065  | 0.1899  | -0.7384 | -0.5119 | -0.3007 | -0.0323 | -0.0079 | 0.2017  | -0.4036 | 0.0827  | -0.0068 |
| PY05145 | -0.594  | -0.1121 | -0.1531 | 0.1838  | 0.5356  | -0.0622 | -0.1985 | -0.321  | -0.1385 | 0.6113  | -0.06   | -0.1352 |
| PY01224 | 0.0042  | -0.1107 | -0.1821 | 0.1844  | 0.3136  | -0.1238 | -0.1708 | -0.1166 | -0.0206 | 0.1278  | -0.0582 | 0.4354  |
| PY01119 | 0.4479  | 0.3647  | 0.4426  | -0.182  | -0.0838 | 0.2038  | 0.4133  | -0.721  | 0.044   | -0.0999 | -0.1347 | 0.188   |
| PY04241 | -0.41   | -0.3403 | -0.8994 | 0.9992  | 1.2641  | 1.25    | -0.2587 | 0.6671  | -0.5601 | 1.0365  | 1.2129  | -0.2308 |
| PY06923 | 0.0021  | 0.1074  | 0.0488  | 0.0798  | 0.1047  | 0.2058  | -0.0075 | 0.0647  | -0.2528 | 0.1803  | -0.414  | -0.0302 |
| PY06076 | -0.313  | -0.0401 | 0.0318  | -0.1354 | -0.3657 | -0.0697 | -0.0035 | 0.0538  | 0.1979  | -0.1035 | -0.189  | 0.1531  |
| PY04639 | -0.1755 | -0.2554 | -0.2851 | 0.0689  | 0.6916  | -0.0654 | -0.0597 | 0.0922  | -0.0902 | -0.0485 | 0.4257  | -0.1419 |
| PY04063 | -0.3905 | -0.281  | -0.0873 | 0.376   | 0.4895  | 0.2782  | 0.0323  | 0.1016  | -0.2597 | -0.0903 | -0.034  | -0.3492 |
| PY00150 | -0.4542 | -0.1436 | -0.0115 | -0.0314 | 0.067   | -0.2391 | -0.1585 | 0.1173  | 0.0469  | -0.064  | 0.0197  | 0.4435  |
| PY04939 | 0.247   | 0.0506  | 0.186   | -0.6545 | -0.4399 | -0.061  | -0.0925 | 0.0387  | 0.0233  | -0.2347 | -0.3367 | 0.1953  |
| PY05356 | 1.0035  | 0.6671  | 0.3039  | 0.7511  | -0.0743 | 0.1908  | 0.1512  | -0.5316 | -0.2267 | -0.3964 | -0.5902 | -0.1773 |
| PY01157 | 0.2282  | -0.1319 | 0.0995  | 0.0942  | 0.1859  | -0.1707 | -0.1234 | 0.0876  | 0.1426  | 0.3062  | 0.0029  | -0.1717 |
| PY00082 | 0.6241  | 0.165   | 0.1923  | 0.0526  | -0.0696 | 0.0367  | -0.0152 | -0.8037 | -0.1446 | -0.3285 | -0.0852 | 0.1156  |
| PY01849 | 0.3142  | -0.0411 | -0.0484 | 0.0532  | -0.0163 | -0.0805 | -0.0535 | -0.0157 | 0.1052  | -0.2205 | -0.0194 | 0.1969  |
| PY05169 | 0.2685  | 0.3549  | 0.6849  | -0.378  | -0.3271 | 0.2549  | 0.588   | 0.1673  | 0.6296  | -0.1167 | -0.1251 | 0.3719  |
| PY05352 | 0.1696  | -0.0461 | 0.2089  | 0.1035  | -0.0055 | -0.0107 | 0.233   | 0.3074  | 0.2047  | 0.0355  | -0.0588 | 0.3511  |
| PY04037 | -1.0265 | 0.1297  | -0.2131 | -0.4433 | 0.4567  | 0.322   | 0.2217  | 0.6537  | 0.324   | 0.0192  | 0.8933  | -0.1536 |
| PY03957 | 1.0732  | 0.3011  | 0.1173  | -0.3634 | -0.396  | -0.1804 | 0.0512  | -0.3956 | 0.0314  | -0.3442 | -0.8851 | 0.0633  |
| PY00502 | -1.2046 | -0.1996 | -0.1386 | -0.237  | -0.2368 | -0.2741 | -0.4854 | 0.2944  | 0.0023  | 0.1631  | 0.3397  | -0.348  |
| PY03378 | 0.2249  | 0.508   | 0.1403  | 0.4775  | -0.0734 | 0.2374  | 0.1902  | -0.1915 | -0.0241 | -0.0744 | -0.3467 | -0.2108 |
| PY04893 | -0.1506 | -0.1259 | -0.2519 | -0.0567 | 0.2482  | -0.0181 | -0.3063 | 0.1723  | 0.0765  | -0.3401 | 0.4337  | -0.3985 |
| PY05015 | 0.4327  | -0.0081 | 0.258   | -0.1053 | -0.496  | 0.0033  | 0.0688  | 0.0464  | 0.2414  | -0.3394 | -0.5316 | -0.1749 |
| PY06631 | 1.1346  | 0.1977  | -0.4504 | 1.0932  | -0.116  | -0.0993 | -0.0296 | 0.3984  | -0.1148 | 0.2906  | 0.0991  | -0.2007 |
| PY05045 | -0.0613 | -0.1675 | 0.0847  | 0.256   | 0.0883  | -0.3379 | -0.3188 | -0.1399 | 0.0628  | -0.0615 | 0.1141  | -0.1545 |
| PY07132 | -0.2039 | 0.1223  | 0.033   | 0.0473  | 0.1347  | 0.2626  | 0.2818  | -0.1282 | 0.161   | -0.1858 | -0.0257 | -0.2446 |
| PY07295 | 0.2318  | 0.0064  | -0.1495 | 0.0472  | -0.2875 | -0.1277 | -0.122  | -0.1415 | -1.1309 | 0.0069  | -0.3549 | -0.2114 |
| PY05692 | 0.912   | 0.6479  | 0.2099  | 0.7152  | -0.0877 | 0.0657  | -0.1166 | -0.3339 | -0.1076 | 0.1562  | -0.5233 | -0.187  |
| PY00066 | -0.2202 | 0.1249  | 0.1735  | -0.2825 | -0.0593 | -0.0747 | -0.0849 | -0.2771 | -0.0753 | -0.1519 | -0.1469 | 0.0005  |
| PY03128 | -0.0158 | -0.0858 | -0.391  | -0.4908 | -0.0149 | 0.1676  | -0.0492 | -0.2332 | -0.3003 | -0.3574 | -0.4347 | -0.2691 |
| PY01320 | 0.2183  | -0.0461 | -0.0825 | 0.3664  | 0.1343  | 0.1409  | -0.1313 | -0.0821 | -0.1392 | -0.2503 | -0.2898 | -0.0943 |
| PY02994 | 1.1345  | 0.7848  | 1.091   | 0.6369  | -0.6569 | 0.0214  | 0.2587  | -0.5821 | 0.1859  | -0.3449 | -0.9009 | 0.0395  |
| PY05628 | 0.5158  | 0.4539  | 0.2643  | 0.4425  | -0.8833 | 0.2553  | 0.2155  | -0.2082 | 0.0658  | -0.1573 | -0.619  | 0.0824  |
| PY03244 | -1.7483 | -0.6565 | -0.2105 | -0.8534 | -0.3346 | -0.0257 | 0.0326  | 0.4712  | 0.0044  | 0.036   | 0.814   | -0.3192 |
| PY00183 | 0.1519  | -0.0545 | 0.0581  | 0.172   | 0.5642  | 0.4752  | -0.0646 | -0.1194 | -0.2024 | 0.021   | 0.3299  | 0.0799  |
| PY07615 | -0.395  | -0.9703 | -0.4614 | -0.1476 | 0.1767  | 0.0403  | 0.1119  | 0.3839  | 0.6869  | 0.4713  | 0.1919  | -0.0639 |
| PY05883 | -0.5679 | -0.2729 | -0.1564 | 0.274   | 0.2297  | -0.1168 | -0.1679 | -0.132  | -0.2531 | 0.0141  | 0.3562  | 0.2555  |
| PY03589 | -0.709  | -0.0345 | -0.213  | 0.2093  | 0.3963  | 0.0264  | 0.0418  | -0.2042 | 0.2493  | 0.5391  | 0.246   | -0.298  |

|         |         |         |         |         |         |         |         |         |         |         |         |         |
|---------|---------|---------|---------|---------|---------|---------|---------|---------|---------|---------|---------|---------|
| PY02022 | -0.029  | 0.09    | 0.0934  | 0.1233  | -0.2876 | 0.0582  | 0.1371  | 0.1052  | 0.1083  | 0.3836  | -0.7002 | 0.1157  |
| PY06659 | -0.4908 | 0.1702  | 0.3292  | 1.0254  | -0.6346 | -0.238  | 0.1138  | 0.1837  | 0.2368  | -0.1008 | -0.5351 | -0.0577 |
| PY02180 | 0.0655  | -0.3571 | -0.0128 | 0.2053  | 0.2784  | 0.0199  | 0.2793  | 0.2342  | 0.4406  | 0.7011  | 0.2167  | 0.1858  |
| PY06068 | -0.2213 | 0.0457  | 0.1511  | -0.377  | 0.0718  | -0.2314 | -0.3609 | -0.4922 | -0.266  | -0.2315 | 0.0113  | -0.2047 |
| PY04521 | -1.4311 | -1.0252 | -0.8815 | -1.1438 | -1.0913 | -0.025  | 0.0448  | 0.5778  | 0.1839  | 0.4106  | 0.6455  | 0.0276  |
| PY07233 | 0.0709  | 0.0769  | 0.2221  | -0.3699 | 0.7509  | 0.3198  | 0.1881  | -0.3008 | 0.0644  | -0.5429 | 0.4102  | 0.2073  |
| PY01562 | -0.2565 | 0.0087  | -0.2038 | -0.2669 | -0.1323 | -0.2636 | -0.2936 | -0.2616 | -0.2753 | -0.3353 | -0.0757 | -0.3162 |
| PY03582 | -0.0611 | 0.1015  | 0.5951  | 0.0026  | 0.118   | 0.3187  | 0.1592  | 0.0064  | -0.4964 | -0.199  | -0.1715 | -0.0444 |
| PY00766 | -0.7611 | -0.2104 | -0.0566 | -0.5746 | 0.3514  | 0.1462  | 0.1513  | -0.7631 | -0.0795 | -0.2849 | -0.2085 | 0.2898  |
| PY04580 | 0.2581  | 0.0765  | -0.1508 | -0.3537 | 0.046   | -0.4368 | -0.5277 | -0.175  | -0.0369 | -0.172  | -0.1431 | -0.3284 |
| PY00161 | 0.8005  | 0.6572  | 0.9251  | 0.2646  | -0.1863 | 0.2918  | 0.5582  | -0.0104 | 0.2312  | 0.3297  | -0.7405 | 0.3662  |
| PY01930 | 0.1801  | -0.1879 | -0.2728 | 0.4029  | 0.9531  | 0.2525  | -0.0623 | -0.2302 | -0.3236 | -0.2875 | 0.3671  | 0.1293  |
| PY04622 | -0.064  | 0.1268  | -0.5701 | -0.1193 | -0.3793 | -0.0083 | -0.1726 | 0.2565  | -0.0172 | 0.1569  | -0.0023 | 0.0209  |
| PY07394 | -0.112  | -0.1914 | -0.958  | -0.6195 | 0.2152  | -0.1712 | -0.2639 | -0.0754 | -0.6126 | -0.1158 | -0.2721 | -0.386  |
| PY03953 | -0.1366 | -0.2039 | -0.0441 | 0.1018  | -0.0563 | -0.0182 | -0.1459 | 0.1943  | -0.0735 | 0.1183  | 0.285   | -0.1202 |
| PY00616 | -0.4457 | -0.0455 | -0.053  | 0.2168  | -0.1431 | 0.0013  | -0.0471 | -0.1756 | -0.0571 | 0.0049  | -0.9077 | 0.0743  |
| PY05441 | -1.5726 | -1.6933 | -1.5196 | -0.2761 | -1.0159 | -0.6937 | -0.0445 | 0.7808  | 0.5243  | 0.636   | 0.9672  | 0.3593  |
| PY06992 | 0.602   | 0.5145  | 0.5453  | -0.1489 | -0.5075 | -0.0377 | 0.106   | -0.1734 | 0.1601  | -0.2087 | -0.3221 | -0.0595 |
| PY06035 | -0.1574 | 0.2272  | -0.1775 | -0.2076 | -0.5112 | -0.023  | 0.2091  | 0.3531  | 0.5157  | 0.2623  | 0.1982  | 0.1125  |
| PY01039 | -0.1222 | -0.3099 | -0.3976 | -0.8256 | -0.537  | 0.1749  | 0.0036  | -0.3393 | 0.0043  | -0.3728 | -0.0191 | -0.0833 |
| PY01997 | 0.3162  | 0.2593  | 0.2061  | 0.0543  | 0.2343  | 0.0262  | 0.0833  | 0.0049  | 0.0004  | 0.0195  | 0.8843  | -0.3053 |
| PY07303 | 0.2157  | 0.0098  | -0.0199 | 0.0374  | -0.0658 | -0.1193 | -0.2413 | -0.4997 | -0.3953 | -0.8844 | -0.4323 | -0.3755 |
| PY01983 | 0.1178  | 0.2148  | 0.2144  | -0.2469 | -0.1603 | -0.0386 | 0.1371  | -0.2308 | -0.0765 | -0.5334 | -0.3594 | 0.0211  |
| PY03698 | -0.2306 | -0.1762 | -0.1396 | 0.0197  | -0.1242 | -0.2847 | 0.0226  | 0.3439  | 0.4934  | 0.0047  | 0.1255  | 0.4012  |
| PY06503 | 0.2167  | 0.1959  | 0.0393  | -0.1049 | -0.8414 | -0.0477 | -0.0812 | -0.1404 | 0.0163  | -0.0833 | -0.1751 | 0.2176  |
| PY02906 | 0.3081  | 0.4903  | -0.2914 | 0.4209  | 0.1311  | -0.1238 | -0.2346 | -0.0202 | -0.1372 | -0.3623 | -0.0045 | -0.4734 |
| PY03775 | 0.2324  | 0.0398  | -0.0731 | 1.0673  | 0.6628  | 0.2347  | -0.0141 | 0.3638  | -0.0167 | 0.8347  | -0.1169 | 0.224   |
| PY03548 | 0.4674  | 0.2192  | -0.0095 | -0.1992 | -0.2227 | 0.2745  | -0.3719 | -0.5036 | -0.4051 | -0.1245 | -0.5258 | -0.2015 |
| PY01512 | -0.5467 | -0.1967 | -0.3055 | -0.3252 | -0.246  | 0.0887  | 0.3544  | 0.5886  | 0.5165  | -0.1245 | 0.5754  | -0.1205 |
| PY05112 | 0.1893  | 0.2687  | 0.2156  | 0.2505  | -0.0765 | -0.2018 | 0.152   | -0.0937 | 0.1744  | 0.1462  | -0.3556 | 0.5067  |
| PY04010 | 0.0631  | -0.0358 | -0.13   | 0.543   | 0.2684  | 0.5696  | -0.1123 | 0.056   | -0.2563 | 0.1705  | -0.2411 | -0.1913 |
| PY02283 | -0.1475 | -0.1115 | -0.1544 | -0.6056 | 0.1619  | 0.2499  | 0.16    | -0.3272 | -0.1035 | -0.5715 | -0.0742 | -0.0051 |
| PY04189 | -0.0487 | -0.2752 | -0.5851 | -0.3395 | 0.0042  | -0.2853 | -0.1955 | -0.0884 | -0.1202 | 0.1079  | 0.1229  | 0.182   |
| PY05660 | -0.1769 | 0.1326  | -0.2173 | -0.121  | 0.0468  | -0.1049 | 0.1257  | 0.2274  | 0.231   | 0.0084  | 0.0907  | 0.2417  |
| PY03958 | -0.1185 | -0.2397 | -0.1487 | -0.2183 | 0.1984  | -0.3169 | -0.14   | -0.0591 | 0.3443  | 0.051   | 0.0017  | 0.2055  |
| PY05494 | -0.2804 | -0.0095 | 0.1578  | -0.2803 | -0.0537 | 0.2752  | -0.4421 | -0.1603 | -0.4404 | -0.3685 | -0.5455 | -0.2314 |
| PY03857 | 0.4162  | 0.2245  | -0.048  | 0.3507  | 0.3083  | -0.1651 | -0.0184 | -0.2904 | -0.4357 | -0.4735 | -0.0611 | -0.4708 |
| PY05281 | 0.2174  | -0.106  | -0.2052 | -0.1589 | -0.0635 | -0.2879 | -0.1398 | -0.0227 | 0.2132  | 0.0462  | 0.0727  | 0.1062  |
| PY05484 | 0.278   | -0.0897 | 0.0699  | -0.1363 | -0.2298 | 0.0137  | 0.4737  | 0.0179  | 0.3645  | -0.3644 | -0.3027 | 0.5494  |
| PY07048 | -0.5062 | 0.0164  | 0.2701  | -0.2312 | -0.3988 | -0.075  | -0.1216 | 0.2474  | 0.1741  | -0.1624 | -0.0774 | -0.2986 |
| PY00976 | 0.3231  | 0.1183  | 0.4406  | -0.086  | -0.2386 | 0.089   | -0.0179 | -0.195  | 0.078   | 0.1829  | -0.3447 | 0.2759  |
| PY01879 | 0.0323  | -0.5306 | 0.2338  | 0.1238  | 0.4319  | 0.0917  | 0.0519  | 0.0292  | -0.2253 | 0.2446  | 0.1253  | 0.317   |
| PY05907 | 0.1626  | 0.0453  | 0.1866  | 0.0409  | -0.4956 | -0.004  | 0.1834  | -0.0588 | 0.2041  | -0.1113 | -0.3294 | 0.0551  |
| PY06640 | 0.2229  | -0.0035 | -0.0756 | 0.0186  | -0.0674 | -0.0674 | 0.0854  | -0.2148 | 0.0013  | -0.141  | -0.3017 | -0.1082 |
| PY04686 | 0.5692  | 0.4723  | 0.2732  | -0.2072 | -0.3427 | -0.0535 | 0.0758  | -0.0023 | 0.0535  | -0.2449 | -0.4066 | 0.1436  |
| PY06413 | 0.0882  | 0.2118  | -0.3688 | -0.5465 | -0.1959 | 0.0558  | 0.2031  | 0.254   | 0.0951  | 0.3417  | 0.4656  | 0.2824  |
| PY03715 | 0.0057  | -0.0092 | -0.1712 | 0.6276  | 0.1609  | 0.0435  | -0.3563 | -0.1804 | -0.2464 | -0.0414 | -0.0027 | -0.3364 |
| PY01638 | 0.5389  | 0.4224  | 0.3142  | -0.5988 | -0.3964 | -0.0279 | 0.2254  | -0.2592 | 0.1203  | -0.8743 | -0.5951 | 0.1696  |
| PY00550 | -0.399  | -0.1311 | 0.1456  | -0.2486 | -0.1652 | -0.3926 | 0.1637  | -0.0129 | 0.1107  | 0.0148  | 0.4146  | 0.3936  |
| PY06362 | -0.0783 | -0.1619 | -0.3524 | -0.2814 | -0.1377 | 0.2193  | 0.0216  | -0.0586 | 0.1213  | -0.0495 | -0.0853 | 0.3649  |
| PY06272 | 0.2203  | 0.0035  | -0.2262 | -0.1724 | 0.1007  | -0.105  | -0.4747 | -0.2292 | -0.312  | -0.1785 | -0.1293 | 0.3607  |
| PY02051 | -0.6818 | -0.41   | 0.0868  | -1.2945 | -0.3957 | -0.0238 | 0.0903  | 0.3956  | 0.2765  | -0.1101 | 1.0267  | -0.0029 |
| PY00800 | 1.2651  | 1.0004  | 1.1029  | 0.2768  | -0.626  | -0.3592 | 0.0751  | -0.8656 | -0.0707 | -0.4542 | -1.4668 | -0.0477 |
| PY01483 | -0.1376 | 0.0872  | 0.3545  | -0.2289 | -0.5206 | 0.1623  | 0.6383  | 0.0942  | 0.2219  | -0.2391 | -0.5882 | 0.2437  |
| PY05705 | -0.2281 | 0.1864  | 0.2514  | 0.3405  | 0.1771  | -0.1986 | -0.2363 | -0.2699 | -0.047  | -0.1122 | -0.5261 | -0.6064 |
| PY01185 | -0.5901 | -0.1787 | -0.0528 | 0.0675  | -0.4552 | -0.1082 | 0.388   | 0.1323  | 0.7424  | 0.2311  | -0.218  | 0.4086  |
| PY07489 | -0.2213 | -0.0103 | 0.129   | 0.7294  | 0.2933  | 0.0251  | -0.0623 | 0.0483  | -0.0287 | -0.0399 | 0.4657  | -0.0141 |
| PY05332 | 0.1098  | 0.0489  | 0.0528  | -0.0634 | -0.5291 | 0.3432  | -0.4214 | 0.1451  | 0.149   | 0.4584  | 0.131   | -0.3173 |
| PY01670 | -0.2051 | -0.0928 | 0.025   | -0.2294 | 0.04    | 0.0992  | 0.2201  | 0.3201  | 0.6093  | 0.2852  | 0.4891  | 0.3925  |
| PY07656 | 0.089   | -0.0224 | -0.0575 | 0.5099  | -0.4604 | -0.2204 | -0.0762 | 0.1427  | -0.1676 | 0.2766  | -0.4406 | -0.5346 |
| PY03813 | -1.1563 | -0.04   | 0.3168  | -0.5142 | 0.0539  | 0.0175  | -0.1305 | 0.0455  | -0.3005 | -0.0384 | 0.1243  | -0.4785 |
| PY01400 | 0.3071  | 0.3175  | 0.1798  | -0.2503 | -0.0468 | -0.109  | -0.0564 | -0.2701 | -0.1553 | -0.5013 | -0.3971 | -0.1942 |
| PY03751 | 0.064   | 0.1004  | 0.5563  | 0.3511  | 0.123   | 0.191   | 0.3711  | -0.1376 | 0.2376  | -0.2395 | -0.0514 | 0.1018  |

|         |         |         |         |         |         |         |         |         |         |         |         |         |
|---------|---------|---------|---------|---------|---------|---------|---------|---------|---------|---------|---------|---------|
| PY00355 | -0.535  | -0.4924 | -0.1169 | -0.0147 | 0.5019  | 0.2455  | -0.1287 | 0.0853  | -0.055  | 0.0846  | 0.2656  | -0.0049 |
| PY00838 | -0.2673 | -0.2595 | -0.0932 | 0.5679  | 0.3914  | 0.1274  | -0.0363 | 0.3024  | -0.3424 | 0.5718  | 0.3563  | 0.0928  |
| PY00652 | -0.452  | 0.285   | 0.2646  | 0.3314  | -0.3498 | -0.2189 | 0.2815  | 0.0771  | 0.25    | 0.4877  | 0.1763  | 0.1474  |
| PY03756 | 0.4065  | 0.1418  | 0.3552  | 0.2622  | -0.216  | 0.0842  | 0.2959  | -0.0987 | 0.0911  | 0.4057  | -0.4419 | 0.1991  |
| PY04680 | 0.2148  | -0.0094 | 0.0707  | 0.1602  | 0.0343  | 0.1317  | -0.0496 | -0.0589 | -0.3081 | 0.0272  | -0.3408 | -0.3321 |
| PY00930 | 0.0135  | 0.2344  | -0.4482 | -0.6919 | -0.4176 | -0.1973 | -0.0649 | -0.2988 | -0.6266 | 0.0425  | -0.0767 | 0.3661  |
| PY01120 | -0.259  | -0.1121 | -0.0725 | -0.1533 | 0.2517  | -0.1059 | -0.1994 | -0.3995 | -0.2126 | -0.2346 | -0.2838 | -0.011  |
| PY03351 | 0.1494  | -0.0781 | 0.0285  | 0.049   | 0.5737  | 0.4178  | 0.0721  | -0.0539 | -0.2473 | -0.1353 | 0.2426  | 0.0024  |
| PY01232 | -0.722  | -0.3645 | -0.1585 | -0.089  | -0.3465 | -0.2958 | 0.1901  | 0.167   | 0.1942  | -0.082  | -0.059  | 0.1517  |
| PY03471 | -0.7836 | -0.2468 | 0.0152  | -0.1979 | -0.3102 | -0.1207 | -0.0713 | 0.369   | 0.2032  | 0.2913  | 0.5428  | 0.2528  |
| PY00591 | -0.6669 | -0.3057 | -0.2221 | -0.795  | -0.7528 | -0.2521 | 0.0955  | -0.1817 | 0.3628  | -0.252  | -0.2843 | -0.0362 |
| PY05323 | -0.8725 | -0.0306 | 0.1898  | -0.2152 | -0.2678 | -0.0437 | -0.0086 | 0.1692  | 0.1995  | -0.2266 | 0.0402  | -0.0362 |
| PY05420 | -0.0044 | 0.0541  | -0.1052 | -0.1375 | -0.1161 | 0.073   | -0.0021 | -0.1142 | -0.1468 | -0.0837 | -0.3466 | -0.0079 |
| PY02899 | 0.3929  | 0.4925  | 0.2596  | 0.0517  | -0.4681 | -0.3315 | -0.1399 | -0.4059 | -0.2398 | -0.2358 | -0.365  | -0.0278 |
| PY03500 | -0.2833 | 0.1121  | 0.3087  | -0.2861 | -0.893  | -0.3787 | 0.1526  | 0.3451  | 0.222   | 0.2406  | 0.2654  | 0.0643  |
| PY03236 | 0.0167  | 0.0308  | 0.2271  | 0.3248  | -0.1956 | 0.0053  | 0.2408  | -0.0146 | 0.2038  | -0.4097 | -0.0934 | -0.0777 |
| PY06815 | -0.4192 | -0.2973 | -1.0088 | -0.5681 | -0.0904 | -0.194  | -0.1452 | -0.1028 | -0.0143 | 0.0878  | -0.3871 | 0.157   |
| PY01923 | -0.2644 | 0.0365  | 0.1863  | -0.5391 | -0.3508 | -0.0485 | 0.1856  | 0.1637  | 0.2335  | -0.46   | -0.111  | -0.0145 |
| PY05777 | 0.3635  | 0.2714  | -0.4599 | 0.0005  | 0.7184  | 0.0402  | 0.3092  | 0.2442  | 0.0925  | 0.2455  | 0.1762  | 0.2667  |
| PY00828 | 0.0762  | 0.1431  | 0.6169  | 0.3022  | 0.0586  | 0.4047  | 0.439   | -0.0948 | 0.3347  | 0.1242  | -0.5215 | 0.3125  |
| PY03212 | -0.5064 | 0.0031  | 0.1222  | 0.1819  | -0.3596 | -0.041  | -0.2292 | -0.1061 | -0.2336 | -0.3915 | -0.0221 | -0.3776 |
| PY04754 | 0.8513  | 0.2387  | 0.0677  | 0.027   | 0.158   | 0.5228  | -0.1233 | -0.4707 | -0.1033 | -0.1616 | -0.5945 | 0.3227  |
| PY03701 | 0.1952  | 0.0351  | -0.1027 | 0.0053  | 0.0832  | 0.0332  | -0.1565 | -0.0985 | -0.2469 | -0.1848 | -0.0242 | -0.1036 |
| PY00608 | -0.0799 | -0.1078 | 0.0534  | 0.4815  | 0.7982  | 0.5176  | 0.4209  | 0.6112  | 0.2237  | 0.7823  | 0.6437  | 0.4401  |
| PY03472 | -0.7418 | -0.2155 | 0.0612  | -0.3301 | -0.1354 | 0.1713  | 0.2154  | 0.2712  | 0.0033  | -0.2387 | 0.5847  | -0.2765 |
| PY07041 | -0.3036 | -0.1291 | 0.0015  | 0.0573  | 0.1747  | -0.0239 | -0.0934 | -0.1672 | -0.0031 | -0.1873 | -0.4065 | -0.0722 |
| PY00443 | 1.1031  | 0.5631  | 0.4456  | 0.3362  | -0.1562 | 0.0656  | 0.0538  | -0.4184 | -0.1219 | -0.8083 | -0.5384 | -0.0825 |
| PY01887 | -0.3347 | -0.1882 | -0.0977 | -0.3967 | 0.2691  | -0.3339 | -0.0071 | -0.4339 | 0.182   | -0.0191 | 0.4753  | 0.36    |
| PY02738 | -0.5534 | 0.0062  | 0.2601  | -0.0179 | -0.2121 | -0.0461 | -0.1769 | 0.2027  | -0.5536 | -0.0713 | 0.1338  | -0.9435 |
| PY05383 | 0.6185  | 0.3039  | 0.1554  | 0.2582  | -0.5567 | 0.2111  | 0.2834  | -0.146  | 0.1927  | -0.0489 | -0.7348 | 0.3371  |
| PY02507 | -0.1304 | 0.236   | 0.1026  | -0.1764 | 0.29    | 0.1975  | -0.1614 | -0.1429 | -0.2146 | -0.0087 | -0.4313 | 0.0242  |
| PY02859 | 0.122   | 0.0648  | 0.0817  | -0.7814 | -0.2796 | 0.0047  | 0.3947  | -0.4582 | -0.8035 | -0.5024 | -0.372  | 0.2921  |
| PY00964 | 0.0845  | -0.0905 | -0.089  | 0.1778  | 0.1229  | -0.1488 | -0.0555 | -0.2404 | -1.0655 | 0.0428  | -0.058  | -0.2258 |
| PY00026 | 0.6428  | 0.2116  | 0.117   | 0.0866  | -0.3632 | -0.3326 | -0.0551 | -0.3907 | 0.1916  | -0.2693 | -0.6283 | 0.7367  |
| PY01217 | 0.229   | 0.1222  | -0.0364 | -0.5568 | -0.0888 | -0.0066 | -0.051  | -0.3161 | -0.2605 | -0.0588 | -0.3155 | 0.1295  |
| PY02176 | 0.3971  | 0.2094  | 0.3715  | 0.2305  | 0.4085  | 0.3545  | 0.4724  | -0.0934 | 0.0111  | 0.0977  | -0.1532 | 0.1871  |
| PY07835 | -0.1359 | 0.0826  | 0.5764  | 0.0732  | 0.1643  | -0.0138 | 0.0032  | 0.2351  | 0.1803  | 0.2051  | 0.2493  | -0.2565 |
| PY02817 | -0.3214 | -0.3342 | -0.4665 | 0.12    | 0.0526  | -0.0653 | 0.2888  | 0.3556  | 0.09    | 0.1631  | 0.4044  | 0.2783  |
| PY00027 | -0.0496 | -0.0808 | -0.248  | -0.1257 | -0.0434 | -0.0183 | 0.0442  | 0.147   | 0.1986  | -0.037  | -0.0475 | -0.0087 |
| PY01447 | 0.3425  | 0.2004  | 0.1434  | 0.025   | -0.5075 | 0.1448  | 0.1255  | 0.0607  | 0.1484  | -0.2897 | -0.6303 | -0.1508 |
| PY02025 | -0.3414 | -0.1184 | -0.053  | -0.1446 | -0.0848 | -0.0152 | -0.0487 | -0.116  | -0.2232 | -0.2374 | 0.179   | -0.2532 |
| PY01589 | 1.0303  | 0.472   | -0.0179 | 0.4119  | 0.0318  | 0.1301  | 0.238   | -0.1763 | 0.0143  | -0.2562 | -0.7611 | 0.0931  |
| PY02303 | -0.2877 | -0.2778 | -0.3297 | 0.2598  | 0.1608  | 0.0014  | -0.1982 | 0.1497  | -0.095  | 0.003   | 0.0025  | -0.235  |
| PY07497 | -0.7107 | -0.2238 | -0.2944 | -0.9633 | -0.6097 | -0.3722 | 0.1236  | 0.4146  | 0.0776  | 0.2344  | 0.7397  | 0.3529  |
| PY06592 | 0.4527  | 0.1256  | 0.1755  | 0.3929  | -0.0683 | 0.1336  | 0.2134  | -0.1118 | 0.4396  | 0.1806  | -0.1691 | 0.232   |
| PY05604 | -0.2777 | 0.2283  | -0.1106 | 0.053   | -0.3205 | -0.2981 | -0.3267 | -0.0208 | -0.1562 | 0.0847  | 0.2362  | -0.3269 |
| PY03219 | 0.2196  | 0.2652  | 0.0429  | 0.1986  | -0.2261 | -0.1139 | 0.2294  | -0.2766 | 0.0297  | 0.0048  | -0.3151 | 0.336   |
| PY04678 | -0.1307 | -0.2165 | -0.2571 | 0.385   | -0.2442 | -0.1465 | -0.1628 | 0.4635  | -0.2336 | -0.1089 | 0.0985  | 0.1231  |
| PY03613 | -0.6493 | -0.1748 | 0.0835  | -0.026  | -0.2318 | -0.0193 | 0.1428  | 0.0888  | 0.3159  | 0.1106  | 0.4737  | 0.0144  |
| PY04891 | -0.4499 | -0.2189 | -0.0282 | 1.0865  | 0.8113  | 0.8313  | 0.1698  | 0.8244  | 0.4644  | 1.317   | 0.9137  | -0.0839 |
| PY02231 | -0.1193 | -0.091  | 0.4406  | 0.0025  | -0.3764 | 0.0822  | 0.2746  | 0.2208  | 0.4413  | 0.5053  | 0.2671  | 0.3274  |
| PY05321 | -0.3788 | -0.6329 | -0.519  | -0.6858 | -0.0639 | 0.0975  | 0.0631  | 0.1009  | -0.0595 | -0.1023 | 0.4364  | -0.4408 |
| PY02920 | 0.1693  | -0.0356 | 0.1462  | -0.1494 | -0.0833 | -0.2339 | 0.3542  | -0.0037 | 0.0332  | -0.2975 | 0.1663  | 0.3492  |
| PY00061 | -0.4568 | -0.8822 | -0.1719 | -0.0983 | -0.3155 | -0.1252 | -0.328  | -0.3286 | -0.0762 | -0.1961 | -0.2905 | -0.2314 |
| PY00119 | -0.4426 | -0.17   | 0.2003  | 0.4475  | -0.461  | -0.1258 | -0.2179 | -0.0174 | 0.1502  | 0.1828  | 0.2713  | -0.2585 |
| PY00052 | -0.3232 | -0.2971 | -0.447  | -0.1711 | -0.1573 | 0.1513  | 0.0638  | 0.1383  | 0.1019  | 0.0279  | 0.1867  | -0.117  |
| PY02058 | -0.6304 | -0.2691 | -0.1892 | -0.1721 | -0.2043 | -0.2069 | 0.1074  | -0.0308 | 0.0515  | -0.0218 | 0.2169  | -0.1997 |
| PY02291 | 1.0581  | 0.6816  | 0.5481  | -0.0543 | 0.0531  | -0.118  | 0.0989  | -0.3347 | -0.147  | -0.2292 | -0.978  | 0.0461  |
| PY01376 | 0.6564  | 0.208   | 0.0164  | 0.7136  | 0.1485  | -0.1993 | -0.2266 | -0.0364 | 0.0351  | 0.2631  | -0.1432 | -0.4362 |
| PY04026 | 0.6941  | 0.2412  | 0.4438  | -0.0603 | -0.2931 | 0.045   | -0.1398 | -0.62   | 0.0514  | -0.5363 | -0.7123 | -0.0192 |
| PY01640 | -0.4042 | -0.1489 | -0.3819 | -0.2622 | 0.1545  | 0.0632  | -0.1177 | 0.0526  | -0.0762 | -0.0417 | 0.2332  | 0.0702  |
| PY07181 | 0.0534  | -0.1544 | 0.1943  | -0.4328 | -0.2884 | 0.568   | 0.2778  | 0.1909  | -0.0287 | -0.1779 | -0.3876 | 0.0228  |
| PY04254 | 0.5492  | -0.1308 | 0.1632  | 0.2615  | 0.6951  | -0.2622 | -0.2938 | -0.2855 | -0.2299 | -0.4519 | -0.7202 | 0.0351  |

|         |         |         |         |         |         |         |         |         |         |         |         |         |
|---------|---------|---------|---------|---------|---------|---------|---------|---------|---------|---------|---------|---------|
| PY01200 | 0.4824  | 0.2173  | -0.1423 | 1.2437  | 0.3499  | 0.4023  | 0.0454  | 0.4351  | -1.7042 | 0.5797  | -0.4342 | -0.6659 |
| PY04438 | -0.9299 | 0.1187  | -0.205  | 0.1455  | -0.1502 | -0.1865 | 0.1802  | 0.4114  | 0.6462  | -0.1092 | 0.1094  | -0.0121 |
| PY05126 | -0.276  | -0.1771 | -0.7676 | -0.5224 | 0.0991  | 0.0122  | 0.0336  | 0.1348  | -0.0672 | 0.1921  | 0.0204  | 0.2577  |
| PY01127 | -0.9777 | -0.3835 | -0.0261 | -0.5531 | 0.0675  | 0.3335  | 0.1375  | 0.2102  | 0.1982  | -0.0989 | 0.3658  | 0.2997  |
| PY03517 | -0.704  | -0.0261 | 0.1008  | 0.1764  | 0.4349  | -0.0513 | -0.0144 | -0.0131 | -0.3168 | -0.1231 | 0.309   | -0.3904 |
| PY03169 | -1.2215 | -0.1938 | 0.0799  | -0.4714 | -0.0774 | -0.33   | -0.1162 | -0.1521 | -0.3133 | -0.2091 | 0.2837  | -0.2469 |
| PY00817 | 0.3794  | 0.0106  | -0.2304 | 0.3252  | 0.4737  | -0.0192 | -0.4242 | 0.0297  | -0.4161 | 0.3492  | -0.1228 | -0.0951 |
| PY03997 | -0.4453 | -0.0541 | -0.1824 | 0.2379  | -0.1517 | -0.4554 | -0.3256 | -0.0747 | 0.0108  | -0.2113 | 0.6565  | -0.3958 |
| PY01049 | -0.6586 | -0.3325 | -0.5541 | 0.344   | -0.9407 | -0.3571 | 0.0508  | 0.3477  | 0.2967  | 0.1892  | 0.5009  | -0.2333 |
| PY03459 | -0.6112 | 0.0119  | 0.4781  | -0.2426 | -0.7784 | -0.1278 | -0.0797 | -0.0383 | 0.3232  | 0.1326  | 0.1154  | 0.1825  |
| PY05543 | 0.0155  | -0.4354 | -0.1231 | 0.4189  | 0.0165  | -0.1842 | -0.0415 | 0.2152  | 0.2707  | 0.4132  | 0.8151  | 0.6325  |
| PY00104 | -0.3159 | 0.0809  | -0.1731 | 0.1217  | 0.02    | 0.0388  | -0.1818 | -0.0524 | -0.1894 | -0.2232 | -0.1045 | -0.3249 |
| PY07036 | -0.246  | -0.099  | 0.0854  | -0.2527 | -0.3553 | -0.4662 | -0.319  | -0.1908 | 0.0407  | -1.099  | 0.1546  | -0.0255 |
| PY01131 | -0.6495 | -0.0614 | -0.0726 | -0.328  | -0.4681 | 0.1761  | -0.2062 | -0.2518 | 0.0587  | 0.0784  | -0.3798 | -0.3602 |
| PY06431 | -1.3332 | -0.3711 | -0.293  | -0.6511 | 0.087   | -0.1427 | -0.1803 | 0.1039  | -0.0794 | 0.2594  | 0.6118  | -0.1646 |
| PY01372 | -0.0997 | -0.1225 | 0.0352  | 0.1245  | 0.3766  | -0.0391 | -0.0991 | -0.4536 | -0.5517 | 0.0449  | -0.2563 | 0.1258  |
| PY02753 | 0.6497  | 0.2724  | -0.1973 | 0.0966  | -0.266  | -0.3904 | -0.3776 | 0.0928  | 0.0194  | -0.0411 | 0.6283  | 0.003   |
| PY04009 | 0.0323  | 0.1113  | 0.2024  | 0.5268  | 0.7768  | 0.1227  | -0.1131 | -0.0814 | -0.2859 | -0.1303 | 0.2677  | 0.0063  |
| PY02936 | -0.1946 | -0.2021 | -0.354  | 0.3331  | -0.1241 | 0.1151  | -0.1068 | 0.0424  | -0.4476 | 0.6541  | -0.2366 | 0.2018  |
| PY03722 | -0.279  | -0.1082 | -0.364  | -0.4348 | 0.5184  | -0.0705 | -0.0232 | 0.1472  | 0.0299  | 0.2874  | 0.7117  | 0.182   |
| PY04231 | -0.1734 | -0.0012 | -0.094  | -0.9961 | -0.9679 | -0.3673 | -0.0427 | -0.3878 | 0.0079  | -0.5072 | -0.3157 | 0.0633  |
| PY07870 | 0.7698  | 0.2669  | 0.4012  | 0.8863  | 0.4279  | 0.0842  | 0.0399  | 0.0975  | 0.211   | 0.7941  | 0.0793  | 0.3499  |
| PY04776 | -0.4245 | 0.0855  | -0.0096 | 0.2941  | -0.0416 | -0.39   | -0.2795 | 0.1588  | 0.2008  | 0.3198  | 0.0916  | 0.0825  |
| PY02568 | -0.3417 | -0.6419 | -0.1341 | 0.227   | -0.0137 | 0.1522  | -0.2002 | 0.2708  | 0.2824  | 0.1185  | 0.3871  | 0.3101  |
| PY01548 | -0.3466 | -0.1595 | -0.4399 | -0.0633 | 0.4168  | 0.0347  | -0.2193 | -0.1757 | -0.3446 | -0.6104 | -0.0489 | -0.1846 |
| PY00807 | 0.2423  | 0.5209  | 0.1471  | 0.8652  | 0.8653  | 0.2614  | -0.0346 | -0.2936 | -0.2565 | 0.1562  | 0.1911  | -0.1442 |
| PY02031 | 0.291   | -0.1814 | -0.142  | 0.3498  | 0.4999  | 0.1927  | -0.0145 | -0.1321 | -0.133  | 0.1298  | -0.1344 | 0.0374  |
| PY01814 | 0.3218  | -0.0372 | -0.4442 | 0.3842  | 0.2664  | 0.1928  | -0.0956 | 0.0912  | 0.1147  | -0.1397 | -0.3269 | -0.3754 |
| PY07072 | 0.1196  | 0.2062  | -0.1272 | -0.3105 | -0.2783 | -0.3142 | -0.1927 | -0.313  | 0.0504  | -0.3382 | -0.1517 | -0.22   |
| PY06885 | 0.4175  | 0.4737  | 0.1555  | 0.1146  | 0.1606  | 0.0725  | 0.0469  | 0.1959  | 0.1551  | -0.1083 | 0.2221  | 0.0959  |
| PY04866 | 0.8706  | 0.2957  | -0.0133 | 0.5649  | -0.1269 | 0.1457  | -0.0734 | -0.2824 | 0.2224  | -0.2502 | -1.0474 | -0.2477 |
| PY06936 | 0.0103  | 0.2272  | 0.1629  | 0.1236  | 0.0762  | -0.206  | -0.1717 | 0.1039  | 0.2009  | 0.2501  | 0.3466  | -0.0206 |
| PY03874 | 0.3282  | 0.083   | 0.1439  | 0.2781  | 0.1503  | -0.0606 | -0.0666 | -0.1352 | 0.0469  | -0.0757 | -0.3293 | 0.3238  |
| PY02177 | 0.2545  | 0.0388  | 0.5466  | -0.0339 | -0.0532 | 0.1384  | 0.303   | 0.2728  | 0.7183  | 0.2026  | 0.1495  | 0.3767  |
| PY05982 | -0.0606 | 0.2773  | 0.6308  | -0.6109 | -0.1481 | 0.3212  | 0.5223  | -0.1328 | 0.0999  | -0.2896 | -0.013  | 0.3375  |
| PY05815 | 0.3779  | 0.0491  | -0.1459 | 0.372   | 0.1986  | 0.029   | 0.0478  | -0.2482 | -0.2585 | -0.159  | 0.0144  | 0.0917  |
| PY02677 | 0.3106  | -0.0672 | -0.2582 | -0.0773 | -0.1469 | 0.0687  | 0.157   | 0.0472  | -0.1163 | -0.2954 | -0.3833 | 0.1636  |
| PY02115 | -0.6016 | 0.0174  | -0.3355 | -0.7431 | -0.235  | 0.0846  | -0.0589 | -0.0209 | 0.1705  | -1.022  | 0.2314  | 0.0541  |
| PY05049 | -0.2886 | 0.0944  | -0.1242 | -0.5554 | -0.3117 | 0.1369  | 0.1535  | 0.229   | 0.0767  | -0.1861 | -0.1236 | -0.142  |
| PY05111 | 0.027   | -0.2175 | -0.4476 | -0.0069 | 0.3387  | 0.0271  | -0.0802 | -0.2306 | -0.2471 | 0.0863  | -0.0987 | -0.1538 |
| PY00351 | 0.1649  | 0.3231  | -0.0267 | 0.2352  | -0.0073 | -0.3051 | -0.6231 | -0.401  | -0.1676 | 0.3734  | -0.2984 | -0.4081 |
| PY04141 | -0.4616 | -0.5236 | -0.3473 | 0.2258  | -0.2133 | 0.0047  | -0.0198 | 0.2839  | -0.4056 | 0.5456  | -0.0064 | 0.037   |
| PY04837 | 0.1738  | -0.249  | -0.319  | 0.2718  | 0.0533  | 0.0169  | 0.0344  | -0.0658 | -0.0539 | 0.1936  | -0.2404 | -0.0101 |
| PY03678 | -0.8972 | -0.6936 | -0.7507 | -0.8472 | -0.0575 | 0.1276  | 0.0275  | 0.238   | 0.1383  | -0.0428 | 0.1654  | 0.019   |
| PY05594 | -0.0184 | 0.1653  | 0.0376  | 0.2998  | -0.1263 | 0.2295  | -0.0307 | -0.2011 | 0.381   | 0.589   | -0.2214 | 0.1192  |
| PY02415 | 0.152   | 0.0446  | -0.2612 | 0.0601  | 0.5302  | 0.0827  | -0.1212 | -0.3031 | -0.3507 | 0.1122  | -0.2645 | -0.0168 |
| PY07561 | 0.2702  | -0.0279 | 0.229   | 0.3038  | 0.081   | 0.169   | -0.0202 | -0.0906 | -0.4521 | 0.2278  | -0.2509 | -0.1125 |
| PY07333 | -0.0539 | -0.1058 | -0.1457 | -0.4876 | -0.3516 | -0.0763 | -0.1558 | -0.1335 | -0.028  | -0.3554 | -0.2054 | 0.0987  |
| PY07607 | 1.2829  | 0.6093  | 0.8216  | 0.354   | -0.2929 | 0.09    | 0.8929  | -0.1339 | 0.4597  | 0.0458  | -0.7618 | 0.9146  |
| PY03116 | 0.0681  | 0.1181  | -0.1085 | -0.4379 | -0.1471 | -0.1135 | 0.1808  | -0.0517 | -0.009  | -0.1959 | -0.1431 | -0.0399 |
| PY03693 | -1.0095 | -0.1905 | -0.2153 | -0.108  | -0.3977 | -0.3642 | -0.074  | 0.4854  | 0.4812  | -0.3709 | 0.5903  | 0.0051  |
| PY03020 | 0.1844  | 0.0201  | -0.6479 | -0.1528 | -0.0369 | 0.1448  | 0.1749  | 0.0584  | 0.1436  | -0.1025 | -0.0307 | 0.1815  |
| PY04732 | -0.2088 | -0.1298 | -0.3536 | 0.7915  | 0.1442  | -0.3013 | -0.2363 | 0.4914  | 0.24    | 0.9564  | 0.1571  | -0.0812 |
| PY07371 | -1.0117 | -0.4092 | -0.1439 | -0.6878 | -1.0559 | -0.6033 | -0.2151 | -0.0796 | 0.1767  | 0.1865  | -0.1584 | 0.3352  |
| PY00982 | -0.5506 | -0.4731 | -0.4947 | 0.1836  | 0.2191  | 0.069   | -0.2163 | -0.2178 | -0.0309 | -0.2836 | 0.1035  | -0.0225 |
| PY05142 | 0.7979  | 0.2979  | 0.5345  | 0.1384  | 0.2305  | 0.0064  | 0.1137  | -0.2395 | 0.0011  | -0.2034 | -0.4792 | -0.0356 |
| PY02982 | -0.2448 | 0.2162  | 0.0945  | -0.1624 | 0.4422  | 0.0061  | 0.4347  | 0.0258  | 0.3356  | 0.0646  | 0.1641  | 0.0528  |
| PY01348 | -0.5725 | 0.0172  | 0.2283  | 0.0406  | -0.209  | -0.3173 | 0.0875  | -0.0464 | 0.098   | -0.0445 | 0.2252  | -0.0537 |
| PY07532 | -0.2852 | -0.3325 | -0.4271 | -0.1038 | 0.4564  | 0.1924  | -0.2169 | 0.1142  | 0.5933  | 0.0962  | -0.0472 | -0.3307 |
| PY03533 | -0.677  | -0.9019 | -0.5877 | 0.1826  | 0.0272  | -0.2027 | 0.1273  | 0.2651  | 0.1656  | -0.312  | 0.2458  | -0.3771 |
| PY06381 | -0.8312 | -0.2419 | -0.1829 | -0.4742 | -0.4069 | -0.2843 | -0.0831 | 0.0719  | 0.3854  | -0.0479 | 0.0758  | -0.1559 |
| PY04173 | 0.2838  | -0.3234 | -0.3235 | 0.037   | 0.5256  | 0.0332  | -0.4727 | 0.0429  | -0.2164 | -0.0494 | 0.0711  | -0.2902 |
| PY05999 | -0.0259 | -0.4051 | -0.385  | -0.1097 | 0.3892  | -0.0767 | 0.0018  | 0.1363  | -0.0698 | -0.052  | 0.1926  | -0.0189 |

|         |         |         |         |         |         |         |         |         |         |         |         |         |
|---------|---------|---------|---------|---------|---------|---------|---------|---------|---------|---------|---------|---------|
| PY05843 | 0.0915  | 0.1028  | 0.1512  | -0.3062 | -0.0251 | 0.1261  | 0.2305  | -0.124  | 0.071   | -0.0078 | -0.0336 | 0.3234  |
| PY01401 | -0.5123 | -0.1655 | 0.0131  | -0.2877 | -0.4023 | -0.4741 | -0.2209 | 0.1563  | 0.3812  | 0.088   | 0.5481  | 0.0134  |
| PY06776 | -0.1154 | -0.1704 | -0.0394 | 0.2804  | -0.0316 | 0.0396  | -0.1503 | 0.2118  | 0.1598  | 0.1614  | -0.0015 | 0.0193  |
| PY01366 | 0.3457  | 0.2314  | 0.1808  | 0.0407  | 0.1505  | 0.2029  | 0.1185  | 0.0122  | -0.0006 | 0.0455  | -0.3252 | 0.1455  |
| PY04074 | -0.1906 | -0.3263 | -0.2177 | 0.173   | 0.1361  | 0.1153  | -0.1141 | -0.0312 | -0.3589 | -0.0415 | -0.3107 | -0.102  |
| PY05925 | 0.4132  | 0.1527  | 0.2367  | -0.2419 | 0.0034  | 0.3884  | 0.6137  | 0.0192  | 0.3666  | -0.2403 | -0.4877 | 0.1156  |
| PY01902 | 0.6308  | 0.4197  | -0.0381 | -0.536  | -0.181  | -0.2895 | -0.1304 | -0.5623 | -0.2471 | -0.3988 | -0.433  | -0.3543 |
| PY07089 | 0.4218  | 0.097   | 0.0186  | 0.1828  | -0.0974 | -0.0389 | -0.104  | 0.0063  | 0.1238  | -0.4019 | -0.2172 | -0.0214 |
| PY00103 | -0.0641 | -0.2369 | -0.372  | -0.0624 | -0.1012 | -0.3459 | -0.0028 | 0.4014  | 0.172   | 0.4084  | 0.3614  | 0.0461  |
| PY01908 | -0.296  | -0.2642 | -0.7226 | -0.291  | 0.3737  | 0.0502  | -0.281  | -0.0837 | -0.203  | -0.1149 | -0.0983 | -0.1716 |
| PY04495 | 0.3549  | -0.0636 | 0.3125  | 0.1231  | -0.3267 | -0.058  | -0.0659 | -0.3217 | -0.0206 | -0.2042 | -0.5716 | -0.7155 |
| PY05279 | 0.9022  | 0.2526  | 0.6518  | 0.1868  | -0.1249 | 0.3619  | 0.5803  | 0.2804  | 0.3772  | -0.0813 | -0.3303 | 0.4311  |
| PY04027 | 0.8619  | 0.5831  | 0.4789  | 0.3027  | -0.2826 | -0.0171 | 0.1685  | -0.2965 | 0.2077  | -0.311  | -0.8234 | 0.0648  |
| PY00631 | -0.3659 | -0.641  | -0.4832 | -0.5794 | -0.1945 | -0.2913 | 0.3246  | -0.1058 | 0.3517  | -0.2286 | 0.0965  | 0.4136  |
| PY00381 | -1.0677 | -0.0939 | 0.2634  | -0.0986 | 0.0451  | -0.0962 | 0.0436  | 0.4197  | -0.175  | -0.7092 | 0.5925  | -0.3589 |
| PY05032 | -0.6585 | -0.1526 | 0.108   | -0.2109 | 0.4671  | 0.0639  | -0.2999 | -0.0877 | -0.0047 | -0.2079 | 0.2373  | -0.1702 |
| PY02446 | 0.4478  | 0.1085  | 0.1924  | -0.1147 | 0.0842  | 0.3138  | 0.3898  | -0.2063 | 0.0228  | -0.4578 | -0.5816 | 0.1844  |
| PY06453 | -0.5036 | -0.0017 | 0.3366  | -0.2556 | -0.2539 | 0.4206  | 0.5348  | 0.5747  | 0.3772  | -0.3575 | -0.0333 | -0.1312 |
| PY07273 | -0.352  | -0.0704 | -0.2749 | 0.0992  | 0.3153  | 0.1045  | 0.083   | 0.3359  | -0.4516 | -0.4981 | 0.3539  | -0.1508 |
| PY02969 | -0.5373 | -0.0758 | -0.1819 | -0.3521 | -0.3886 | 0.0984  | 0.2386  | 0.2432  | -0.2874 | -0.4044 | -0.4889 | -0.5534 |
| PY04740 | -0.4233 | -0.5015 | 0.1243  | 0.0084  | -0.1628 | 0.2742  | 0.1179  | 0.2901  | 0.3576  | -0.0017 | -0.0025 | -0.1367 |
| PY02776 | 0.0606  | -0.0615 | 0.2071  | 0.6297  | 0.0853  | 0.2032  | 0.1249  | -0.0816 | -0.0641 | -0.6117 | -0.0989 | 0.0989  |
| PY06285 | -1.3318 | 0.0142  | -0.3836 | -0.6664 | -0.7393 | -0.52   | 0.3412  | 0.8785  | 0.8313  | 0.6188  | 1.7662  | 0.2558  |
| PY01470 | -0.1384 | -0.0459 | -0.021  | -0.7688 | -0.9096 | -0.0622 | -0.1274 | -0.7693 | -0.2719 | -0.4715 | -0.8901 | 0.0482  |
| PY05658 | 0.1802  | 0.1288  | -0.187  | -0.4323 | -0.2874 | 0.3014  | 0.0055  | -0.2797 | -0.2549 | 0.0117  | -0.7489 | 0.0343  |
| PY05746 | 0.5122  | 0.2829  | 0.081   | 0.4481  | 0.1322  | 0.2539  | 0.1002  | 0.169   | -0.1303 | -0.0468 | -0.1984 | 0.159   |
| PY02709 | -0.1774 | -0.2005 | -0.0505 | -0.4563 | -0.0927 | 0.0687  | 0.204   | 0.0077  | 0.3012  | -0.1074 | -0.0462 | 0.3272  |
| PY01356 | -0.5171 | -0.0832 | 0.2379  | -0.3814 | 0.356   | 0.2064  | -0.1591 | -0.0847 | -0.2298 | -0.5037 | 0.1273  | -0.63   |
| PY06448 | -0.6934 | -0.1235 | -0.1139 | 0.1     | 0.2436  | 0.1686  | 0.1087  | -0.1619 | 0.067   | 0.1626  | 0.2615  | -0.1322 |
| PY01002 | -0.1661 | -0.1412 | 0.3081  | 0.3806  | 0.4765  | -0.0599 | -0.1478 | -0.2324 | -0.2516 | 0.2216  | 0.2629  | -0.2242 |
| PY01274 | -0.7404 | 0.0216  | -0.2149 | -0.0218 | -0.0821 | 0.5496  | 0.0721  | 0.5058  | -0.0095 | -0.302  | -0.2086 | -1.0199 |
| PY04941 | -0.0121 | 0.0895  | -0.0711 | 0.6627  | 0.1172  | -0.029  | -0.0301 | 0.561   | 0.2605  | 0.2812  | 0.0254  | -0.1623 |
| PY02918 | -0.7643 | -0.0528 | 0.138   | 0.1714  | 0.1054  | 0.2163  | 0.1361  | 0.2044  | -0.0085 | 0.2401  | 0.1137  | -0.172  |
| PY02377 | 0.6907  | 0.1541  | 0.0367  | -0.0594 | 0.2306  | -0.1962 | -0.1194 | -0.2485 | -0.1603 | -0.2479 | -0.4658 | 0.0989  |
| PY04777 | -0.4713 | 0.2457  | 0.3486  | 0.6492  | 0.1097  | -0.1816 | -0.1252 | 0.1064  | 0.304   | 0.3335  | 0.965   | -0.0201 |
| PY05695 | -0.1066 | 0.1908  | 0.2404  | 0.519   | 0.2568  | 0.1524  | 0.1849  | 0.2973  | 0.1583  | 0.4126  | 0.0495  | 0.1044  |
| PY04892 | -0.0993 | -0.0553 | -0.2984 | -0.1234 | 0.0576  | -0.1386 | -0.2562 | -0.2176 | -0.1162 | -0.913  | -0.0029 | -0.5862 |
| PY03621 | -0.4991 | -0.0937 | -0.0523 | -0.1597 | -0.2947 | -0.1187 | 0.0466  | 0.2832  | 0.1926  | 0.202   | 0.1185  | -0.0659 |
| PY02069 | -0.0244 | -0.0688 | 0.0759  | 0.7151  | 0.57    | -0.0342 | -0.1333 | 0.5016  | 0.2524  | 0.6196  | 1.123   | 0.2564  |
| PY05481 | 0.0802  | 0.0475  | -0.1247 | -0.4212 | -0.0611 | 0.0327  | 0.0525  | -0.1675 | -0.0896 | -0.1158 | -0.0774 | 0.1423  |
| PY01360 | 0.1075  | -0.1692 | -0.3355 | 1.5415  | 1.0326  | 0.0731  | -0.2961 | 0.5811  | 0.0914  | 1.033   | 0.9177  | 0.1031  |
| PY06043 | -0.0729 | -0.2709 | -0.2803 | -0.3602 | 0.2291  | -0.2235 | -0.0411 | -0.3219 | -0.0715 | -0.2385 | -0.105  | 0.0429  |
| PY05468 | 0.1086  | 0.1993  | 0.1947  | 0.6609  | 0.164   | 0.1839  | 0.0497  | 0.1078  | -0.0024 | 0.5305  | 0.0913  | -0.093  |
| PY00571 | -0.5735 | -0.3086 | -0.1097 | 0.7282  | 0.4016  | 0.0398  | -0.1508 | 0.3842  | 0.024   | 0.1981  | 0.4042  | -0.1692 |
| PY02312 | 0.0994  | 0.1849  | 0.0522  | -0.6285 | -0.1623 | -0.0439 | -0.0452 | -0.1974 | 0.054   | -0.5456 | 0.0404  | 0.0311  |
| PY00878 | 0.2463  | 0.1449  | 0.2618  | -0.1357 | -0.4766 | 0.0775  | 0.0281  | 0.0145  | 0.3551  | -0.0926 | -0.6764 | -0.0681 |
| PY06426 | -0.8375 | -0.2617 | 0.1756  | -0.3408 | -0.4261 | -0.5441 | -0.1129 | 0.2463  | 0.2101  | 0.3296  | 1.0956  | 0.0635  |
| PY04304 | 0.2473  | -0.0022 | 0.2491  | -0.3942 | 0.2221  | 0.1127  | 0.2796  | -0.1944 | 0.3717  | -0.4095 | -0.4073 | 0.0853  |
| PY00469 | -0.9041 | -0.2805 | -0.4674 | 0.9527  | -0.7903 | -0.6552 | -0.6039 | 0.0823  | -0.589  | 0.148   | -0.01   | -0.0385 |
| PY00013 | -0.1116 | -0.0718 | -0.2026 | -0.1008 | 0.4713  | -0.1158 | 0.0869  | 0.1268  | 0.0271  | -0.1537 | 0.2811  | 0.2598  |
| PY03680 | 0.6081  | 0.2448  | -0.2539 | 0.1452  | 0.0496  | -0.0725 | -0.1864 | -0.3081 | -0.1985 | -0.0528 | -0.224  | -0.0323 |
| PY05084 | 0.2922  | 0.06    | -0.2923 | -0.4035 | 0.1487  | 0.2488  | 0.2455  | -0.1349 | -0.0829 | -0.2856 | -0.1282 | -0.1146 |
| PY02247 | -0.3818 | 0.2174  | 0.2997  | -0.1636 | -0.1273 | -0.1811 | 0.4301  | 0.1028  | 0.244   | 0.3744  | 0.5919  | 0.1373  |
| PY01432 | -0.278  | -0.2444 | -0.2363 | 0.6996  | -0.2641 | -0.0948 | 0.0712  | 0.2627  | 0.0292  | 0.5461  | -0.2304 | 0.3587  |
| PY01756 | -0.7318 | -0.7242 | -0.5195 | -1.3787 | 0.6214  | 0.0264  | -0.2312 | -0.0426 | -0.4646 | 0.0091  | 0.1835  | -0.0397 |
| PY01297 | 0.1109  | -0.3131 | -0.5787 | 0.4748  | 1.4187  | 1.3813  | 0.0726  | 0.5978  | 0.3352  | 0.8453  | 0.8944  | 0.7212  |
| PY00194 | 0.14    | 0.2812  | 0.5693  | -0.2274 | -0.3909 | 0.0644  | 0.5945  | -0.0991 | 0.1732  | -0.012  | -0.5271 | 0.2121  |
| PY01905 | -0.6169 | 0.2263  | -0.4404 | 0.2581  | -0.1792 | 0.2383  | 0.1753  | 0.2646  | 0.528   | 0.3789  | 1.0189  | 0.2753  |
| PY01282 | 0.3503  | 0.105   | 0.0035  | -0.1187 | 0.2902  | 0.4199  | 0.0089  | -0.1837 | -0.145  | -0.0813 | -0.2147 | 0.0419  |
| PY01069 | 0.1937  | 0.0378  | 0.103   | -0.0771 | -0.1229 | 0.0814  | -0.2014 | 0.0367  | -0.3606 | 0.2835  | -0.3494 | -0.0153 |
| PY00071 | 0.1977  | -0.1709 | 0.3429  | -0.3112 | 0.0216  | 0.0895  | -0.085  | -0.2641 | 0.0801  | 0.0192  | -0.8252 | 0.2013  |
| PY00462 | -0.1947 | -0.5528 | -0.5676 | -0.5892 | -0.0753 | -0.1201 | -0.0559 | 0.1013  | -0.0731 | -0.2179 | 0.2709  | -0.2943 |
| PY01553 | -0.1918 | -0.3324 | -0.1873 | -0.1868 | 0.3486  | -0.0351 | -0.0262 | -0.0367 | -0.106  | 0.2401  | 0.1996  | 0.3268  |

|         |         |         |         |         |         |         |         |         |         |         |         |         |
|---------|---------|---------|---------|---------|---------|---------|---------|---------|---------|---------|---------|---------|
| PY02104 | -0.5687 | 0.1045  | 0.0085  | -0.0307 | -0.2308 | -0.0377 | -0.0335 | 0.1179  | 0.622   | 0.2005  | 0.0197  | 0.0297  |
| PY00681 | 0.2121  | 0.2888  | -0.3164 | 0.185   | -0.4345 | -0.5509 | -0.489  | -0.3379 | -0.1563 | -0.2811 | -0.0896 | -0.2662 |
| PY03460 | -0.2453 | 0.2395  | -0.2729 | -0.4391 | -0.0533 | -0.0452 | -0.0062 | 0.0624  | -0.0802 | 0.0327  | 0.6139  | -0.1185 |
| PY07080 | 0.1254  | 0.0119  | -0.3022 | 0.9949  | 0.2297  | -0.0669 | -0.069  | 0.0788  | 0.0486  | -0.0843 | 0.3447  | -0.1928 |
| PY02384 | -0.2228 | -0.0079 | -0.1539 | 0.0684  | -0.2083 | 0.0146  | 0.1322  | -0.1889 | 0.1098  | -0.1858 | -0.1345 | 0.2415  |
| PY02209 | 0.5975  | 0.1746  | 0.1008  | 0.6953  | 0.2113  | -0.1648 | -0.1586 | 0.0146  | -0.2262 | -0.044  | -0.1088 | -0.2244 |
| PY04061 | 0.1837  | -0.0528 | -0.2009 | -0.0685 | 0.3938  | -0.0336 | 0.188   | -0.1701 | 0.149   | -0.1357 | 0.1173  | 0.4149  |
| PY00788 | -0.5197 | -0.1377 | -0.0233 | -0.5772 | 0.2635  | 0.0604  | 0.1771  | 0.1086  | 0.1939  | -0.1769 | -0.0786 | 0.1366  |
| PY00646 | -0.4849 | -1.0141 | -1.182  | -0.922  | -0.3189 | -0.1787 | -0.2818 | 0.2951  | 0.3638  | 0.7337  | 0.547   | 0.1859  |
| PY01073 | -1.0704 | -0.1824 | 0.1332  | 0.1234  | -0.338  | -0.1563 | -0.1136 | 0.2237  | 0.0236  | 0.4459  | 0.1662  | -0.1825 |
| PY04528 | -0.0484 | -0.1762 | -0.5218 | -1.3314 | -0.2828 | -0.222  | -0.2697 | -1.1878 | -0.501  | -1.8507 | -1.43   | -0.1238 |
| PY06081 | -0.2778 | -0.2176 | -0.3486 | 0.5046  | -0.618  | 0.0308  | -0.0157 | 0.3083  | 0.0462  | 0.3332  | 0.0541  | 0.0798  |
| PY01023 | -0.3952 | -0.1705 | -0.2019 | 0.2495  | 0.8482  | 0.3872  | -0.1474 | 0.1134  | -0.0168 | 0.585   | 0.471   | 0.1172  |
| PY06397 | 0.9969  | 0.5766  | 0.8216  | 0.214   | 0.0496  | 0.0716  | -0.0245 | -0.5503 | -0.1254 | -0.1384 | 0.4441  | -0.0623 |
| PY07382 | -0.1371 | 0.0224  | 0.4691  | -0.3071 | -0.1765 | 0.2305  | 0.4577  | 0.3439  | 0.0744  | -0.6118 | -0.568  | -0.7316 |
| PY06009 | 0.1622  | 0.1579  | -0.0414 | -0.0594 | 0.1952  | -0.099  | -0.0866 | 0.1547  | 0.0324  | 0.1448  | 0.2798  | -0.0291 |
| PY01180 | 0.4886  | 0.3655  | 0.4059  | 0.1147  | -0.1128 | -0.0046 | 0.0768  | -0.1333 | 0.2055  | -0.0943 | -0.3872 | 0.2105  |
| PY03054 | -0.0858 | -0.0461 | -0.0514 | 1.3712  | 0.6798  | 0.0936  | 0.0131  | 0.8175  | 0.0927  | 1.368   | 0.9782  | 0.1641  |
| PY02816 | 0.0262  | -0.0708 | 0.2976  | 0.1535  | -0.1343 | -0.4328 | -0.0234 | 0.0053  | 0.0121  | -0.1608 | -0.295  | 0.0427  |
| PY01555 | -0.1853 | -0.0752 | 0.1989  | 0.1175  | -0.2381 | -0.0694 | -0.0855 | 0.1904  | -0.0306 | 0.1391  | 0.1197  | -0.0349 |
| PY00664 | -0.3348 | 0.1164  | 0.5395  | 0.3141  | -0.1437 | -0.3014 | -0.3854 | 0.276   | 0.226   | -0.0721 | 0.3973  | -0.1324 |
| PY00549 | 0.5163  | 0.2736  | 0.7257  | 0.1039  | -0.1096 | 0.2991  | 0.4675  | -0.0511 | 0.3928  | -0.0614 | -0.4722 | 0.4378  |
| PY06156 | 1.1103  | 0.1923  | 0.1875  | 0.7669  | 0.5604  | 0.3136  | 0.2009  | 0.083   | 0.115   | 0.518   | 0.0019  | 0.3095  |
| PY04370 | 0.2667  | 0.0995  | 0.0958  | 0.7021  | -0.7011 | 0.2335  | -0.0605 | 0.272   | -0.0919 | 0.4547  | 0.3352  | 0.3807  |
| PY02599 | -1.0038 | -0.4141 | -0.1796 | 0.1401  | 0.1239  | 0.2833  | -0.2248 | 0.1008  | -0.2472 | -0.1887 | -0.0701 | -0.2617 |
| PY04441 | -0.5409 | -0.6791 | -0.631  | 0.2503  | 0.623   | 0.1942  | -0.1649 | -0.0082 | -0.3264 | 0.182   | -0.0415 | 0.3147  |
| PY01722 | -0.258  | 0.0016  | 0.1678  | 0.6575  | -0.0895 | -0.4309 | 0.0588  | 0.3448  | 0.0819  | -0.449  | 0.5984  | 0.457   |
| PY05104 | -0.1592 | -0.0698 | 0.1271  | 0.2285  | 0.2824  | 0.22    | 0.0825  | -0.2759 | -0.2731 | -0.0988 | 1.2553  | -0.2768 |
| PY02552 | -0.1005 | 0.0717  | -0.0249 | 0.0905  | -0.4857 | -0.2852 | -0.0854 | 0.2387  | 0.1517  | 0.982   | -0.2052 | 0.3953  |
| PY05246 | -0.4564 | -0.4106 | -0.375  | -0.09   | 0.0333  | -0.1838 | 0.0405  | 0.5807  | 0.3966  | 0.5705  | 1.1947  | -0.015  |
| PY05582 | -0.1768 | -0.0112 | 0.2174  | -0.9897 | -0.7748 | -0.1049 | 0.4743  | -0.0847 | 0.7415  | -0.3315 | -0.3802 | 0.9708  |
| PY00426 | -0.3928 | -0.2868 | 0.1488  | 0.1451  | 0.371   | 0.0879  | -0.0171 | 0.0136  | -0.0926 | 0.429   | 0.2984  | 0.3175  |
| PY06276 | -0.5269 | -0.0639 | 0.1716  | -0.4796 | -0.2323 | -0.1788 | 0.2436  | -0.0217 | 0.0873  | -0.3297 | 0.1697  | 0.0836  |
| PY05188 | -0.2473 | -0.2566 | -0.6007 | 0.2496  | 0.4038  | -0.1244 | -0.3425 | -0.2025 | -0.2997 | -0.161  | -0.079  | -0.2066 |
| PY02094 | -0.1103 | 0.1584  | 0.0648  | -1.1888 | -0.4376 | -0.1538 | -0.0401 | -0.7578 | -0.0898 | -1.0985 | -0.5894 | -0.1239 |
| PY02334 | -0.0628 | 0.0285  | 0.1444  | -0.1478 | -0.0054 | 0.3004  | 0.3544  | 0.194   | 0.0921  | -0.4396 | -0.0569 | -0.2817 |
| PY00796 | 0.6267  | 0.3991  | 0.3926  | 0.5315  | -0.0643 | -0.032  | 0.0962  | 0.0598  | 0.0085  | -0.0676 | -0.3499 | 0.4705  |
| PY03896 | 0.1505  | -0.3878 | -0.3218 | 0.27    | 0.0232  | -0.0803 | -0.2488 | 0.0661  | -0.25   | 0.1181  | 0.5275  | 0.1465  |
| PY01062 | -0.1576 | -0.0741 | -0.1024 | -0.0267 | 0.2022  | 0.2704  | 0.1685  | -0.0061 | -0.0474 | 0.1457  | -0.2429 | 0.129   |
| PY00667 | -0.3093 | -0.0718 | -0.2702 | -0.3257 | 0.0497  | 0.0994  | 0.0294  | 0.1079  | 0.0827  | 0.0115  | -0.0649 | -0.1207 |
| PY05476 | -0.027  | -0.0519 | 0.218   | 0.0393  | -0.0948 | 0.3111  | 0.208   | 0.0032  | -0.0981 | -0.0267 | 0.0522  | 0.8447  |
| PY05216 | -0.9791 | -0.2716 | 0.1699  | 0.1901  | -0.4427 | -0.5041 | -0.1171 | 0.0775  | 0.0911  | 0.2039  | 0.5803  | 0.0712  |
| PY05640 | 1.3235  | 0.9213  | 1.3388  | -0.071  | -0.8647 | -0.1845 | 0.7572  | -0.2511 | 0.4496  | -0.1851 | -1.3057 | 0.5005  |
| PY06915 | -0.172  | -0.0562 | 0.3259  | 0.0246  | -0.0369 | -0.4505 | -0.3579 | -0.3005 | -0.2178 | -0.1429 | 0.18    | -0.078  |
| PY00781 | -0.7532 | -0.2949 | 0.2229  | -0.0322 | 0.188   | -0.1426 | 0.0241  | -0.2913 | -0.4865 | -0.168  | -0.2969 | -0.2172 |
| PY02745 | -0.8364 | -0.3565 | -0.5255 | 0.2056  | 0.0797  | -0.0704 | -0.2008 | 0.4794  | -0.0017 | 0.4675  | 0.5353  | -0.0289 |
| PY02456 | -1.6737 | -0.0514 | -0.8839 | -1.0007 | 0.072   | 0.0098  | 0.2526  | 0.6036  | 0.2565  | 0.3855  | 0.9178  | -0.2787 |
| PY06899 | 0.4418  | 0.1956  | 0.1001  | 0.5355  | 0.1769  | 0.3005  | 0.0673  | -0.229  | -0.2327 | -0.3438 | -0.3282 | -0.2276 |
| PY05983 | -0.4261 | -0.3808 | -0.1905 | -0.0053 | -0.1331 | -0.2639 | -0.0299 | 0.3229  | 0.4436  | 0.5862  | 0.2102  | 0.4158  |
| PY00775 | -0.3857 | -0.3703 | -0.4046 | -0.0801 | 0.1961  | 0.1222  | 0.0097  | -0.0063 | -0.1867 | 0.0495  | 0.2751  | -0.1896 |
| PY04861 | 0.4376  | 0.0567  | 0.1312  | 1.1784  | 1.2511  | 0.5772  | 0.453   | 0.3103  | 0.2562  | 0.5249  | 0.8331  | 0.5961  |
| PY06773 | 0.1255  | 0.1084  | -0.0134 | -0.3199 | 0.1445  | 0.2702  | 0.1049  | -0.2361 | -0.349  | -0.4026 | -0.6793 | -0.0353 |
| PY01171 | -0.1934 | -0.0566 | -0.2658 | 0.7787  | -0.1455 | 0.0461  | -0.1497 | 0.5542  | -0.3413 | 0.237   | 0.2212  | -0.2622 |
| PY06180 | 0.3653  | 0.1849  | 0.2082  | -0.3778 | 0.0613  | -0.3501 | 0.0541  | -0.1    | 0.1589  | 0.0717  | -0.3116 | 0.3328  |
| PY00036 | 0.0385  | 0.2369  | 0.3525  | 0.665   | 0.2839  | 0.1196  | 0.4604  | 0.1387  | 0.3872  | -0.0197 | 0.3431  | -0.104  |
| PY02214 | -0.1482 | 0.4154  | 0.0709  | -0.3005 | -0.243  | -0.1621 | -0.0687 | 0.0026  | 0.0369  | -0.002  | 0.2479  | -0.5573 |
| PY02409 | 0.25    | -0.0975 | -0.0754 | -0.3163 | -0.1678 | -0.3867 | -0.1419 | -0.4653 | -0.3442 | -0.347  | -0.442  | 0.179   |
| PY05735 | 0.4158  | -0.0267 | -0.6242 | -0.2843 | -0.3217 | 0.1708  | 0.3775  | 0.0674  | 0.0815  | 0.1392  | -0.2896 | 0.8223  |
| PY04377 | -0.1874 | -0.0394 | 0.0331  | -0.1467 | 0.0304  | -0.2112 | 0.1132  | -0.0303 | 0.1749  | -0.0198 | 0.0482  | -0.2686 |
| PY02635 | -0.0377 | -0.0941 | -0.0302 | 0.16    | 0.3048  | 0.5341  | 0.1162  | 0.1436  | 0.85    | 0.4871  | 0.4146  | 0.3947  |
| PY01946 | 0.4194  | 0.1125  | 0.0318  | -0.1953 | -0.3323 | 0.181   | 0.0308  | -0.2447 | -0.15   | -0.0215 | -0.5453 | -0.0036 |
| PY01009 | -0.0864 | -0.3295 | -0.5691 | 0.8774  | 0.6875  | 0.141   | -0.149  | -0.0972 | -0.2147 | 0.0136  | -0.2004 | -0.2676 |
| PY02366 | 0.9411  | 0.5617  | 0.4761  | 0.3176  | -0.1657 | 0.1584  | 0.5352  | 0.0684  | 0.3714  | 0.093   | -0.6386 | 0.3386  |



|         |         |         |         |         |         |         |         |         |         |         |         |         |
|---------|---------|---------|---------|---------|---------|---------|---------|---------|---------|---------|---------|---------|
| PY00220 | 0.5171  | 0.3584  | 0.2585  | -0.5118 | -0.5937 | -0.3462 | 0.0411  | -0.8035 | -0.0945 | -0.8812 | 0.0322  | 0.0027  |
| PY03319 | 0.0095  | 0.256   | 0.3118  | 0.3506  | -0.2533 | 0.1343  | 0.4444  | -0.0823 | -0.3247 | -0.1592 | -0.1514 | 0.5405  |
| PY05499 | 0.7385  | 0.3727  | -0.1555 | -0.4458 | 0.1175  | -0.0656 | -0.2094 | -0.3957 | -0.4768 | -0.5462 | -0.1848 | -1.0442 |
| PY01206 | -1.6698 | -0.7737 | -0.4943 | -0.9453 | -1.1514 | -0.9651 | -0.1731 | -0.1247 | 0.3146  | -0.3744 | 0.629   | 0.0623  |
| PY03208 | -0.828  | -0.1674 | -0.3163 | -0.6236 | -0.5761 | 0.1582  | 0.16    | 0.0988  | 0.266   | -0.3311 | -0.0692 | -0.4091 |
| PY03394 | 0.2426  | 0.1562  | 0.1591  | 0.1482  | 0.2101  | 0.4052  | 0.3061  | 0.0468  | 0.0317  | -0.1189 | -0.4003 | 0.0594  |
| PY01448 | 0.2131  | -0.06   | -0.3169 | -0.3064 | 0.2034  | 0.2222  | -0.3175 | -0.1078 | -0.3412 | -0.8542 | -0.0553 | -0.3185 |
| PY05006 | -0.3353 | -0.0676 | -0.1188 | -0.3731 | -0.3691 | -0.0633 | 0.0172  | 0.1036  | -0.0352 | -0.4124 | 0.1337  | -0.182  |
| PY03823 | -1.3122 | -0.6694 | -0.6963 | -0.1431 | -0.1675 | 0.0753  | -0.0447 | 0.1388  | -0.1952 | -0.0055 | 0.4318  | -0.0962 |
| PY02202 | -0.0806 | -0.0389 | -0.158  | 0.5501  | 0.6066  | 0.1089  | 0.1828  | 0.1817  | -0.1218 | 0.2079  | 0.3988  | 0.2442  |
| PY06605 | -0.5153 | -0.2451 | 0.1901  | 0.3514  | 2.2151  | 0.184   | 0.0624  | 0.2346  | -0.0872 | -0.1196 | 0.7347  | -0.0577 |
| PY05399 | -0.6874 | -0.1374 | -0.0997 | -0.2339 | -0.4934 | -0.4469 | -0.3522 | -0.0455 | -0.0458 | -0.0657 | 0.4196  | -0.3297 |
| PY01959 | 0.3283  | 0.388   | 0.5029  | -0.067  | 0.0328  | 0.2606  | 0.4275  | -0.0382 | 0.4935  | 0.0635  | 0.1154  | 0.5609  |
| PY01474 | 0.6698  | 0.1948  | 0.0852  | 0.0182  | 0.1499  | -0.1226 | 0.0379  | -0.1902 | -0.0187 | -0.1698 | -0.222  | 0.0594  |
| PY06799 | 0.275   | 0.6418  | 1.0731  | -0.4778 | -0.8551 | 0.0279  | 0.5617  | 0.0637  | 0.5994  | -0.489  | -0.6888 | 0.5508  |
| PY04544 | 0.0044  | 0.1265  | 0.3407  | -0.3232 | -0.1507 | -0.11   | 0.3533  | 0.2012  | 0.3304  | -0.5287 | -0.0947 | 0.3775  |
| PY01762 | -0.7461 | 0.1915  | -0.0441 | -0.521  | -0.4309 | 0.1937  | 0.1056  | 0.1042  | -0.15   | -0.3635 | -0.0879 | -0.7211 |
| PY06533 | 0.7323  | 0.378   | -0.6276 | -0.481  | -0.0486 | 0.038   | -0.1238 | -0.1207 | -0.294  | -0.345  | -0.2408 | -0.2344 |
| PY04137 | 0.2451  | 0.2051  | -0.3787 | 0.3158  | -0.5732 | -0.4049 | -0.073  | 0.1845  | 0.1812  | 0.3064  | -0.0137 | -0.0873 |
| PY07372 | -0.4782 | -0.2662 | -0.338  | -0.7723 | -0.4462 | -0.1701 | -0.2327 | -0.19   | -0.0616 | -0.4101 | -0.0792 | 0.2129  |
| PY05917 | -0.1558 | 0.0124  | 0.1936  | 0.0119  | -0.4325 | -0.119  | 0.0259  | -0.0691 | 0.1311  | 0.0232  | -0.3286 | 0.1721  |
| PY07300 | 0.0562  | -0.1454 | -0.321  | -0.6449 | 0.1112  | -0.2499 | 0.1334  | -0.2877 | -0.0467 | -0.6245 | -0.4197 | 0.1049  |
| PY06696 | 0.3188  | 0.0775  | 0.0246  | 0.4252  | 0.2156  | -0.1672 | -0.1455 | -0.123  | -0.2433 | -0.1988 | -0.264  | -0.3683 |
| PY05592 | -0.6636 | 0.0036  | 0.5506  | -0.1865 | 0.011   | 0.518   | 0.5379  | -0.0797 | 0.2716  | -0.3436 | -0.031  | -0.5907 |
| PY05269 | 0.162   | 0.0189  | -0.2572 | 0.1903  | 0.1404  | 0.0988  | -0.1153 | 0.1666  | -0.0093 | 0.1557  | 0.1276  | 0.2735  |
| PY05357 | -0.8526 | -0.6895 | -0.787  | -0.745  | 0.3777  | 0.1087  | -0.0952 | 0.0061  | -0.4663 | -0.2898 | 0.1801  | -0.2007 |
| PY04073 | 0.4905  | 0.3174  | 0.2244  | 0.6165  | 0.8167  | 0.8022  | 0.2338  | 0.2641  | 0.0872  | 0.2123  | 0.9246  | -0.1072 |
| PY01240 | -0.8974 | 0.1521  | 0.1584  | -0.1998 | -0.2708 | 0.0861  | 0.3271  | 0.1853  | 0.1433  | -0.1642 | 0.4976  | -0.0734 |
| PY01289 | 0.4083  | 0.606   | 0.0682  | 0.2101  | 0.123   | -0.1352 | -0.1523 | -0.3103 | -0.219  | -1.07   | -0.3474 | -0.0257 |
| PY06281 | -0.2907 | -0.0798 | -0.2917 | 0.4884  | 0.0597  | 0.1473  | -0.0774 | 0.0719  | -0.1387 | 0.3719  | 0.0506  | -0.2538 |
| PY02720 | 0.1125  | 0.002   | -0.0498 | -0.2307 | 0.0092  | -0.0618 | 0.1044  | -0.1228 | 0.1769  | 0.0353  | 0.0688  | 0.2065  |
| PY01739 | -0.1673 | -0.1403 | -0.2743 | -0.2796 | -0.5598 | -0.1014 | 0.0427  | -0.2297 | 0.103   | 0.1051  | 0.05    | 0.0076  |
| PY06123 | -0.3079 | -0.2731 | 0.2219  | -0.3673 | -0.3934 | 0.0603  | -0.0178 | -0.0889 | -0.0551 | 0.1975  | -0.2196 | 0.0899  |
| PY03483 | -0.1501 | -0.2345 | -0.4386 | -0.3865 | -0.3127 | -0.1928 | -0.2908 | -0.0905 | 0.0104  | -0.054  | 0.1484  | 0.0111  |
| PY00297 | 0.7952  | 0.5579  | 0.3029  | -0.955  | -0.5793 | 0.0176  | 0.3273  | -0.3317 | 0.1769  | -0.3263 | -0.7837 | 0.48    |
| PY02950 | -0.5059 | -0.4315 | -0.3747 | 0.0852  | 0.1921  | 0.3304  | 0.0814  | 0.2982  | -0.0605 | 0.1625  | 0.3996  | -0.0746 |
| PY05008 | 1.0869  | 0.7061  | -0.1927 | 0.0254  | -0.1745 | 0.0981  | 0.2951  | 0.3493  | 0.3147  | 0.197   | -0.1199 | 0.4775  |
| PY02256 | -0.1251 | -0.2323 | -0.1686 | 0.745   | 0.755   | 0.0984  | -0.0902 | 0.0751  | -0.0399 | 0.3106  | -0.1185 | 0.0223  |
| PY02099 | -0.0773 | -0.0675 | -0.016  | 0.1077  | 0.07    | 0.0009  | -0.1697 | -0.0944 | -0.2335 | -0.369  | 0.068   | -0.4824 |
| PY06924 | 0.0811  | -0.0223 | -0.2184 | 0.4355  | 0.212   | 0.1138  | -0.2351 | -0.2984 | -0.3163 | -0.1694 | -0.7807 | -0.1151 |
| PY06861 | 0.0466  | 0.073   | 0.025   | -0.4917 | -0.1416 | -0.2166 | 0.1839  | -0.3    | 0.1844  | -0.3967 | -0.0198 | 0.1155  |
| PY00944 | -0.4827 | -0.1041 | -0.2104 | -0.227  | 0.2614  | 0.1781  | -0.0702 | 0.0872  | -0.1689 | -0.2508 | -0.1161 | -0.2059 |
| PY00996 | -0.7724 | -0.387  | -0.6312 | -0.074  | -0.7388 | -0.2884 | -0.3521 | 0.5296  | 0.5021  | 0.3057  | 0.2524  | -0.1179 |
| PY00970 | 0.5255  | 0.2931  | -0.0838 | 0.0684  | -0.4566 | 0.171   | -0.1655 | -0.543  | -0.8441 | -0.313  | -0.7281 | -0.2272 |
| PY00201 | -0.0745 | -0.5315 | -0.0135 | -0.6424 | 0.0284  | -0.1442 | -0.0053 | -0.2109 | -0.0553 | -0.2715 | -0.3898 | 0.0847  |
| PY05524 | -0.0471 | 0.0986  | -0.0013 | -0.1945 | 0.1811  | 0.1084  | 0.028   | -0.091  | 0.1395  | -0.0359 | 0.0272  | 0.1026  |
| PY05577 | -0.9364 | -0.0389 | 0.4926  | -0.4795 | -0.2468 | -0.0976 | -0.0795 | 0.0286  | 0.4141  | 0.3451  | 0.6553  | -0.1339 |
| PY06409 | -0.0221 | 0.1873  | -0.0368 | -0.7434 | -0.717  | 0.2101  | -0.0253 | 0.4393  | 0.29    | -0.4751 | -0.3886 | 0.0139  |
| PY00928 | -0.1708 | -0.088  | 0.2049  | -0.5634 | -0.226  | -0.3615 | -0.2943 | -0.2838 | -0.1143 | -0.4983 | 0.1743  | -0.4208 |
| PY07293 | 0.1698  | -0.0134 | 0.0162  | 0.0389  | 0.6291  | 0.1857  | -0.1726 | -0.2511 | -1.1657 | -0.1809 | -0.0813 | -0.1287 |
| PY05736 | 0.0816  | -0.0626 | -0.5222 | 0.6558  | 0.5316  | -0.1526 | -0.4373 | -0.485  | -0.2433 | -0.3142 | -0.7652 | -0.2446 |
| PY02697 | -0.1435 | 0.0092  | -0.1931 | -0.15   | 0.229   | -0.0008 | -0.0682 | -0.1069 | -0.1934 | -0.0211 | -0.2341 | 0.1038  |
| PY02045 | -0.4136 | -0.0663 | -0.2951 | 0.1636  | 0.3692  | 0.1326  | -0.0881 | 0.1182  | -0.1943 | -0.0284 | -0.2577 | -0.1915 |
| PY01050 | -0.4414 | -0.4159 | -0.4568 | -0.5466 | 0.2051  | 0.0712  | 0.0145  | 0.4895  | 0.4717  | -0.4714 | -0.1441 | -0.2839 |
| PY02650 | 0.0452  | -0.0316 | -0.1855 | -0.0477 | 0.5241  | 0.1608  | -0.1811 | -0.1089 | -0.2181 | -0.3753 | -0.0054 | -0.267  |
| PY01159 | 0.2919  | 0.1695  | -0.0991 | 0.2249  | 0.3208  | 0.1585  | -0.0143 | -0.0335 | 0.0499  | -0.1874 | 0.3207  | 0.2299  |
| PY04274 | 0.7784  | 0.2427  | -0.0305 | -0.2863 | -0.1975 | 0.1504  | -0.1735 | -0.1773 | -0.1849 | -0.1209 | -0.2327 | -0.1372 |
| PY03561 | 0.6423  | 0.2212  | 0.5716  | -0.5239 | -0.2851 | -0.6688 | -0.5705 | -0.3429 | -0.0798 | -0.4208 | 0.0436  | -0.1906 |
| PY06714 | -0.8909 | -0.1245 | 0.0508  | -0.2953 | -0.1159 | -0.0196 | 0.1165  | 0.1892  | 0.1725  | -0.0177 | 0.1772  | -0.4979 |
| PY03534 | -0.4507 | -0.2155 | 0.6082  | 0.1531  | -0.3516 | -0.1893 | 0.5822  | 0.4254  | 0.9373  | 0.3848  | -0.1582 | 0.6986  |
| PY04530 | -0.0606 | -0.2692 | 0.0954  | 0.05    | 0.0518  | 0.2303  | -0.1654 | 0.068   | -0.0542 | 0.2903  | -0.0387 | 0.2525  |
| PY01114 | 0.2142  | 0.1238  | -0.0941 | -0.6782 | -0.0359 | -0.3323 | -0.4356 | -0.422  | -0.4116 | -0.2847 | 0.1897  | -0.2444 |
| PY03669 | 0.3711  | 0.1641  | 0.075   | -0.1314 | -0.0574 | 0.2286  | 0.1299  | -0.1848 | -0.0816 | -0.0321 | 0.0347  | 0.1985  |

|         |         |         |         |         |         |         |         |         |         |         |         |         |
|---------|---------|---------|---------|---------|---------|---------|---------|---------|---------|---------|---------|---------|
| PY05023 | 0.1033  | 0.7562  | 0.2372  | -0.0123 | 0.0344  | -0.3533 | -0.0761 | -0.3676 | 0.0015  | -0.0806 | -0.2855 | -0.5564 |
| PY04779 | -1.3323 | -0.1451 | 0.0801  | 0.5635  | -0.1487 | -0.4175 | -0.2775 | 0.1557  | -0.1125 | -0.3999 | 0.5417  | -0.1135 |
| PY02768 | 0.2506  | -0.0146 | 0.3157  | 0.1474  | 0.3487  | -0.0816 | -0.1339 | -0.0772 | 0.0869  | 0.5667  | -0.0704 | 0.2984  |
| PY03795 | -0.3554 | -0.673  | -0.9781 | -0.7109 | -0.3017 | -0.0757 | 0.1484  | 0.4985  | 0.4034  | 0.5334  | 1.3724  | 0.7761  |
| PY07243 | -0.6094 | 0.3006  | 0.2479  | -0.7173 | -0.1988 | -0.252  | 0.0941  | 0.1009  | 0.0994  | -0.4851 | 0.2958  | -0.4831 |
| PY05837 | 0.7805  | 0.5672  | 0.668   | 0.4529  | -0.1121 | 0.3535  | 0.3538  | 0.3344  | 0.2964  | 0.3248  | -0.5533 | 0.2843  |
| PY01390 | 0.0984  | -0.0696 | -0.1343 | 0.0904  | 0.491   | -0.3488 | -0.3963 | -0.1697 | -0.3037 | 0.0142  | 1.1033  | 0.0025  |
| PY06390 | -0.1899 | -0.7064 | -0.421  | -1.1581 | -0.6426 | -0.422  | -0.1515 | 0.3516  | 0.244   | 0.6315  | 1.2791  | 0.6175  |
| PY07461 | -0.0993 | -0.0596 | -0.034  | 0.5517  | -0.6956 | -0.1553 | 0.2278  | 0.2678  | 0.335   | 0.1891  | -0.399  | 0.3291  |
| PY07476 | -0.2498 | 0.4434  | -0.6119 | -0.0154 | 0.0016  | 0.3945  | 0.0157  | 0.3397  | -0.1266 | -0.1044 | 0.1512  | -0.9815 |
| PY01503 | -1.299  | -0.3588 | -0.2227 | -0.677  | -0.0275 | -0.0944 | -0.2232 | 0.0123  | -0.1213 | 0.0819  | 0.7214  | -0.3232 |
| PY06024 | 0.0564  | -0.3793 | 0.2976  | -0.6838 | -0.3203 | 0.0699  | 0.2653  | -0.2316 | 0.3143  | -0.3786 | -0.1677 | -0.1183 |
| PY04848 | -0.7924 | -0.3165 | -0.0222 | -0.7771 | -0.7502 | -0.5865 | -0.1919 | 0.1222  | 0.2532  | -0.196  | 0.1155  | -0.3015 |
| PY00396 | -0.4101 | -0.0638 | -0.2782 | 0.1276  | 0.3307  | 0.0203  | -0.0735 | 0.2063  | -0.1322 | 0.4266  | 0.5868  | 0.2481  |
| PY05718 | 0.1961  | -0.1571 | -0.1839 | 0.0364  | 0.0499  | -0.0284 | -0.026  | 0.2653  | 0.4255  | 0.0997  | 0.2131  | -0.4158 |
| PY06865 | -0.0071 | 0.025   | -0.0997 | 0.0957  | 0.136   | -0.1648 | -0.0719 | -0.0032 | 0.1566  | 0.0987  | -0.0745 | 0.1192  |
| PY00137 | 0.4564  | 0.236   | -0.0327 | 0.0531  | -0.0284 | -0.0461 | -0.0868 | -0.0866 | 0.0174  | -0.0069 | -0.2958 | -0.0137 |
| PY00697 | -0.1128 | -0.098  | -0.3029 | 0.1423  | 0.261   | 0.0055  | 0.1584  | 0.1732  | 0.0857  | 0.337   | 0.2228  | -0.1159 |
| PY06706 | -0.7906 | -0.0949 | 0.1252  | -1.1445 | -0.018  | -0.0734 | 0.113   | 0.1698  | -0.1817 | -0.1331 | 0.3015  | -0.1919 |
| PY05016 | -0.199  | -0.1722 | -0.2091 | 0.0551  | 0.4622  | 0.3999  | 0.206   | -0.0288 | 0.16    | 0.1123  | 0.0299  | -0.1053 |
| PY00527 | -0.0729 | 0.1274  | 0.1763  | 0.1174  | -0.0307 | 0.0402  | 0.0833  | -0.0288 | 0.0939  | -0.1031 | -0.2597 | 0.2198  |
| PY06694 | -0.4518 | -0.1604 | -0.1219 | 0.1204  | 0.5516  | 0.2448  | 0.0782  | 0.088   | -0.1099 | 0.0024  | -0.0904 | 0.0236  |
| PY05774 | 0.1665  | 0.0746  | -0.1793 | -0.0293 | 0.2228  | 0.1421  | 0.0319  | 0.1075  | -0.6534 | 0.2288  | 0.1615  | -0.0644 |
| PY01439 | 0.3853  | 0.3379  | -0.1849 | 0.2739  | -0.3104 | 0.1577  | 0.2741  | 0.0315  | 0.2847  | -0.6036 | 0.4181  | 0.1037  |
| PY02082 | 0.3842  | 0.4111  | 0.3698  | 0.2878  | -0.2136 | 0.2404  | 0.1083  | -0.047  | 0.1113  | 0.1563  | -0.4158 | 0.0633  |
| PY04357 | 0.0561  | 0.0023  | 0.2785  | -0.1367 | -0.0141 | 0.1009  | 0.3836  | 0.0218  | 0.3867  | -0.0436 | -0.0806 | 0.4527  |
| PY00388 | -0.4563 | -0.6794 | -0.3903 | 0.6221  | 0.5758  | 0.1487  | -0.2599 | 0.0912  | -0.1745 | 0.3811  | 0.4968  | 0.0875  |
| PY03136 | -0.0213 | -0.2061 | -0.6882 | 0.0172  | 0.2891  | -0.2391 | -0.2803 | 0.2053  | 0.123   | 0.3053  | 0.4109  | -0.0605 |
| PY07433 | -0.2613 | -0.1936 | 0.0326  | -0.2546 | -0.6106 | -0.0755 | -0.125  | 0.0643  | -0.0316 | 0.0123  | -0.3868 | 0.2792  |
| PY05565 | 0.0603  | -0.0139 | 0.0545  | -0.1594 | -0.2622 | -0.1243 | -0.002  | -0.1025 | 0.1538  | 0.1157  | 0.0279  | 0.4782  |
| PY05386 | -0.5734 | -0.4899 | -0.0897 | -2.3378 | -0.3258 | -0.1925 | 0.1233  | 0.1401  | 0.1669  | -0.0693 | 0.0239  | -0.2743 |
| PY02399 | -0.0629 | 0.3259  | 0.5795  | 0.3347  | 0.3898  | 0.66    | 0.3705  | 0.1054  | -0.0522 | 0.1758  | 0.2261  | 0.0236  |
| PY03300 | 0.1182  | -0.0399 | 0.439   | 0.3412  | -0.0248 | -0.0813 | -0.0485 | 0.1249  | 0.0767  | 0.2261  | 0.3495  | 0.137   |
| PY01152 | 1.0024  | 0.5384  | 0.7851  | -0.0101 | -0.2646 | -0.2183 | 0.1207  | -0.271  | -0.0086 | -0.2408 | -0.552  | 0.1781  |
| PY00278 | -0.7959 | -0.4322 | -0.3973 | -0.1701 | -0.1968 | -0.1494 | -0.0274 | 0.3424  | 0.2928  | -0.023  | 0.2586  | -0.6009 |
| PY00832 | -0.5497 | -0.2749 | -0.2494 | -0.0842 | -0.1934 | -0.0115 | 0.1775  | 0.459   | 0.3064  | 0.1608  | 0.184   | 0.1052  |
| PY04701 | -0.0899 | 0.1649  | -0.4493 | -0.189  | 0.0469  | 0.0178  | 0.023   | 0.0148  | -0.0258 | 0.3628  | 0.3624  | 0.2449  |
| PY03646 | -0.3791 | -0.4718 | -0.3554 | 0.2171  | -0.0942 | -0.1356 | -0.5282 | -0.0153 | -0.0914 | 0.2334  | 0.4873  | -0.2747 |
| PY04870 | 0.0877  | 0.1581  | 0.1597  | 0.9556  | 0.0572  | 0.0087  | 0.1546  | 0.0959  | -0.1994 | 0.1099  | 0.0247  | -0.7084 |
| PY06208 | -0.6186 | -0.192  | -0.0155 | 0.0454  | -0.1077 | 0.0316  | -0.1019 | -0.0561 | 0.0545  | 0.1597  | -0.1242 | 0.0814  |
| PY06807 | 0.2898  | 0.2906  | 0.0228  | 0.704   | 0.3459  | -0.0004 | -0.7754 | -1.0798 | 0.1963  | 0.8561  | 0.4075  | 0.083   |
| PY07339 | -0.7797 | 0.1921  | 0.1272  | -0.4806 | -0.4833 | 0.0087  | 0.3181  | 0.6991  | 0.4277  | 0.058   | 0.7035  | -0.6279 |
| PY00821 | -0.0274 | -0.0764 | 0.0494  | 0.1659  | 0.9771  | 0.8743  | -0.1135 | 0.1935  | 0.0687  | 0.2044  | 0.8275  | 0.2269  |
| PY04114 | 0.4732  | 0.2504  | 0.2231  | 0.3437  | 0.0369  | -0.0178 | 0.0682  | 0.1316  | 0.1145  | 0.073   | -0.2529 | 0.141   |
| PY03101 | -0.1143 | -0.2487 | -0.3537 | -0.1148 | 0.2913  | -0.1703 | -0.3907 | -0.2118 | -0.4041 | 0.0252  | -0.2395 | -0.0265 |
| PY05882 | 0.2182  | 0.1133  | 0.0568  | -1.7695 | -0.3908 | 0.1474  | 0.3057  | -0.5102 | 0.1502  | -0.9498 | -0.971  | -0.1727 |
| PY05728 | -0.086  | -0.1009 | -0.1086 | -0.1205 | -0.0386 | 0.129   | -0.046  | 0.0392  | 0.0218  | 0.0366  | 0.22    | 0.094   |
| PY04052 | 0.1867  | 0.1443  | 0.1967  | -0.0122 | -0.7162 | -0.2142 | -0.009  | -0.0306 | 0.2601  | -0.6417 | -0.8265 | 0.0577  |
| PY02494 | -0.2711 | -0.2094 | -0.062  | -0.7105 | 0.1711  | 0.0892  | -0.1826 | -0.2039 | -0.3    | -0.2872 | 0.1115  | -0.0758 |
| PY04911 | -1.1718 | -0.3106 | -0.0046 | 0.1816  | 0.0845  | 0.3922  | 0.0126  | 0.5071  | 0.2104  | 0.295   | 0.6334  | -0.1806 |
| PY01926 | 0.5496  | 0.0493  | -0.0337 | 0.2312  | 0.4342  | -0.2967 | -0.1971 | -0.6003 | -0.1686 | -0.6571 | -0.3087 | -0.034  |
| PY04349 | -0.0477 | -0.052  | -0.1481 | 0.2361  | -0.0104 | 1.1084  | 0.2743  | 0.3888  | 0.2776  | 0.6516  | 0.2209  | 0.1056  |
| PY05850 | 0.2614  | -0.1834 | 0.2376  | -0.0183 | 0.1521  | 0.0296  | 0.1435  | -0.2032 | -0.4883 | -0.1227 | -0.0396 | 0.3046  |
| PY03303 | 0.3782  | 0.1743  | -0.0896 | -0.3269 | 0.2835  | -0.1987 | 0.0688  | -0.3158 | -0.4893 | -0.1366 | -0.0738 | 0.1012  |
| PY06875 | 0.6458  | 0.2784  | 0.2312  | -0.0134 | -0.4031 | 0.082   | 0.0889  | 0.0115  | 0.1742  | -0.4312 | -0.3118 | -0.1002 |
| PY01609 | -1.394  | -0.3949 | -0.2229 | -0.2707 | -0.3811 | 0.0672  | -0.231  | 0.1291  | -0.1359 | 0.0318  | 0.4518  | -0.1524 |
| PY03182 | -0.9311 | -0.3532 | -0.4246 | -0.5207 | -0.1317 | -0.0754 | -0.1928 | -0.0298 | 0.3467  | -0.2375 | 0.6017  | -0.0533 |
| PY00003 | -0.5356 | -0.4172 | 0.0228  | -0.3402 | -0.5709 | -0.34   | -0.1492 | -0.0654 | -0.59   | -0.4543 | -0.4371 | -0.3533 |
| PY04674 | -0.7111 | -0.2187 | 0.0554  | -0.2784 | 0.1664  | 0.042   | 0.0321  | 0.0024  | 0.077   | -0.2429 | 0.5472  | -0.1001 |
| PY06953 | 0.4988  | 0.2256  | 0.3003  | 0.4838  | 1.1782  | 0.3915  | 0.3586  | -0.0202 | -0.7438 | 0.3913  | 0.2149  | 0.4654  |
| PY00605 | 0.243   | 0.0141  | -0.1219 | 0.278   | -0.1468 | -0.1034 | 0.0561  | -0.1228 | 0.0596  | 0.082   | 0.044   | 0.1236  |
| PY00074 | 0.537   | 0.1682  | -0.1182 | 0.1118  | -0.3321 | -0.2081 | -0.1063 | -0.1555 | -0.0593 | -0.0085 | -0.174  | -0.0226 |
| PY01423 | -1.4678 | -0.0957 | -0.0395 | -0.1405 | 0.064   | -0.3775 | -0.2705 | 0.2529  | 0.2741  | 0.3518  | 1.0716  | -0.3523 |

|         |         |         |         |         |         |         |         |         |         |         |         |         |
|---------|---------|---------|---------|---------|---------|---------|---------|---------|---------|---------|---------|---------|
| PY03044 | -0.3285 | -0.2579 | -0.5247 | -0.1229 | -0.4007 | -0.2693 | -0.1343 | -0.034  | -0.1581 | 0.1502  | -0.4173 | -0.1249 |
| PY03768 | -0.0609 | -0.0083 | 0.0368  | 0.3323  | -0.1585 | 0.0135  | 0.148   | 0.5075  | 0.1015  | 0.1644  | 0.0695  | 0.3817  |
| PY05973 | -0.2646 | -0.3216 | -0.2855 | -0.3177 | -0.067  | -0.338  | -0.2617 | 0.0614  | -0.098  | -0.1069 | 0.0759  | -0.4365 |
| PY04991 | -0.5463 | 0.1944  | 0.254   | -0.425  | -0.3669 | -0.1547 | 0.1411  | -0.1556 | 0.1672  | -0.5818 | -0.0301 | 0.0533  |
| PY01126 | -0.7618 | -0.1788 | -0.3776 | -0.6006 | -0.3884 | -0.1403 | 0.0433  | 0.3597  | 0.1653  | -0.37   | 0.1811  | -0.4896 |
| PY03309 | 0.4055  | 0.0002  | 0.1505  | 0.1223  | -0.1625 | -0.1699 | -0.1803 | -0.1635 | 0.1548  | -0.394  | -0.4285 | -0.1798 |
| PY00860 | -1.3168 | -0.2961 | -0.2374 | -0.0078 | -0.8536 | -0.8764 | -0.2464 | 0.4968  | -0.0937 | 0.1118  | 0.6011  | 0.0785  |
| PY02229 | -0.1497 | 0.0685  | 0.1788  | 0.1194  | 0.2749  | 0.1237  | 0.0344  | -0.1157 | -0.1606 | 0.2801  | 0.4326  | 0.0793  |
| PY00540 | 0.3767  | 0.3418  | 0.6214  | -0.6287 | -0.6591 | -0.1239 | 0.0279  | -0.488  | -0.0191 | -0.5497 | -0.5847 | 0.191   |
| PY01895 | -0.2059 | -0.0117 | 0.2697  | -0.4098 | -0.3558 | -0.4488 | -0.0381 | -0.0895 | 0.1016  | -0.4685 | 0.1404  | 0.3257  |
| PY02260 | -0.5874 | -0.0239 | -0.5486 | -0.7802 | -0.8368 | -0.0642 | 0.1644  | 0.0901  | 0.1228  | 0.2882  | -0.0909 | -0.1802 |
| PY04600 | 0.6855  | 0.1294  | 0.2344  | 0.3259  | -0.0767 | -0.0385 | -0.1665 | -0.4118 | -0.1691 | -0.3094 | -0.6298 | -0.1238 |
| PY04263 | 0.422   | 0.3343  | 0.2147  | -1.1662 | -1.0649 | 0.3743  | 0.0819  | -1.1852 | 0.4744  | -0.8767 | -1.0912 | 0.2581  |
| PY01098 | 0.3554  | 0.0729  | 0.3461  | -0.0536 | -0.0638 | 0.2296  | 0.255   | 0.1737  | 0.399   | 0.0743  | -0.0758 | 0.3798  |
| PY06824 | 0.2337  | 0.1104  | 0.2049  | 0.1148  | -0.017  | -0.0519 | 0.1098  | 0.3068  | 0.0213  | -0.1405 | -0.2269 | 0.1047  |
| PY03520 | -0.6495 | -0.3604 | 0.0253  | 0.2951  | 0.5934  | 0.0689  | -0.1672 | 0.2323  | 0.3238  | 0.6662  | 0.3082  | 0.1535  |
| PY05132 | -0.3634 | -0.1769 | -0.0484 | 0.2283  | 0.3171  | -0.2753 | -0.0293 | 0.2356  | -0.3667 | 0.6198  | 0.5173  | 0.1411  |
| PY06857 | 0.6805  | 0.0206  | -0.0543 | 0.8061  | 0.0413  | 0.018   | -0.0613 | -0.1251 | -0.1358 | -0.3939 | -0.3575 | -0.1869 |
| PY00858 | 0.6233  | -0.0032 | -0.4473 | 1.035   | 0.2987  | 0.1457  | 0.1323  | -0.0425 | 0.0149  | 0.165   | -0.2189 | 0.2661  |
| PY01576 | -0.1879 | 0.1867  | 0.4885  | -0.0318 | -0.5048 | -0.4274 | -0.0681 | -0.1272 | 0.0508  | -0.3546 | -0.3151 | -0.376  |
| PY06140 | -0.8273 | -0.3318 | -0.4714 | -0.8746 | -0.6227 | -0.3674 | 0.0147  | 0.0818  | -0.0977 | -0.079  | 0.5075  | 0.3971  |
| PY07428 | 0.9548  | 0.3433  | 0.2979  | 0.186   | -0.1787 | -0.0556 | 0.334   | 0.0166  | 0.3979  | 0.3843  | -0.4566 | 0.5505  |
| PY00758 | -0.0151 | -0.0971 | 0.2091  | 0.4359  | 0.0264  | 0.2729  | 0.3659  | 0.2152  | 0.3689  | -0.1619 | -0.1053 | 0.1648  |
| PY03036 | -0.6254 | -0.1349 | -0.0445 | -0.32   | -0.3302 | -0.0927 | -0.1202 | -0.0018 | -0.1754 | -0.1674 | 0.3448  | -0.2099 |
| PY00588 | 0.9858  | 0.5717  | 0.7316  | -0.0066 | -0.2698 | 0.4135  | 0.659   | 0.0343  | 0.3684  | -0.3761 | -1.1588 | 0.2688  |
| PY06734 | 0.208   | 0.2263  | 0.0686  | 0.3635  | 0.0686  | -0.1354 | -0.0347 | 0.1558  | -0.0283 | 0.1785  | 0.0528  | -0.0093 |
| PY06679 | -0.5149 | 0.0882  | 0.4291  | 0.7795  | 0.2163  | -0.1575 | -0.1693 | -0.039  | -0.0619 | 0.0574  | 0.3889  | 0.1367  |
| PY07304 | 0.6572  | -0.0111 | 0.0465  | -0.1329 | -0.1492 | -0.4064 | -0.7903 | -0.3654 | 0.1066  | 0.1295  | -0.0317 | 0.278   |
| PY00897 | -0.4723 | -0.3187 | -0.4215 | 0.0785  | -0.129  | -0.306  | -0.2162 | 0.1353  | -0.0658 | 0.1351  | 0.5613  | -0.2615 |
| PY01146 | 0.9422  | 0.2507  | 1.0272  | 0.9403  | 0.0345  | 0.0165  | 0.5182  | 0.2345  | 0.6188  | -0.2961 | 0.0534  | 0.4659  |
| PY02860 | 0.2716  | 0.3692  | 0.4588  | -0.5449 | -0.2485 | 0.248   | 0.3523  | -0.3442 | 0.0507  | -0.3429 | -0.4253 | 0.199   |
| PY06524 | 0.1275  | 0.2009  | 0.4114  | 0.0532  | -0.1225 | 0.0172  | -0.0124 | 0.1475  | 0.071   | -0.7411 | -0.0597 | 0.594   |
| PY01460 | 0.591   | 0.1371  | 0.4148  | -0.5977 | -0.5737 | -0.0855 | 0.584   | -0.0418 | 0.8038  | -0.0283 | -0.0607 | 1.136   |
| PY04883 | -0.8022 | -0.1025 | -0.4442 | -0.7381 | -0.5582 | -0.3262 | -0.1556 | 0.1231  | 0.4046  | -0.1379 | 0.1539  | -0.3854 |
| PY01088 | -1.6454 | -0.6321 | -0.5332 | -1.4766 | -1.3619 | 0.0333  | 0.2926  | 0.872   | 0.5125  | -0.0208 | -0.0629 | 0.0484  |
| PY02893 | 0.0873  | -0.1438 | 0.1471  | -0.0103 | 0.343   | 0.1793  | 0.0667  | -0.1825 | -0.2782 | -0.0192 | -0.2335 | 0.152   |
| PY02717 | -0.2394 | -0.1139 | 0.051   | 1.1384  | -0.0705 | 0.0121  | -0.2638 | 0.4441  | -0.2349 | 0.499   | 0.1265  | -0.1729 |
| PY03252 | 0.0969  | 0.1507  | 0.0595  | 0.2786  | 0.2117  | 0.1572  | 0.0597  | -0.0831 | 0.1531  | 0.0926  | 0.2645  | -0.0467 |
| PY03278 | -0.2926 | -0.1524 | 0.1247  | 0.0371  | 0.8168  | 0.195   | 0.1714  | 0.0291  | -0.2779 | 0.2446  | -0.2068 | -0.1721 |
| PY00047 | 0.033   | -0.0113 | -0.1419 | -0.5651 | -0.0483 | 0.0307  | 0.0737  | 0.0978  | -0.1585 | -0.2324 | 0.0022  | -0.2745 |
| PY01805 | -0.7928 | -0.5522 | -0.4545 | 1.144   | -0.3245 | -0.0123 | 0.1156  | 0.234   | 0.1949  | 0.5211  | 0.7454  | 0.2595  |
| PY01797 | -0.1943 | -0.2882 | -0.3856 | 0.0676  | 0.0245  | -0.0441 | -0.1471 | -0.0266 | -0.2422 | -0.0861 | 0.2517  | -0.1283 |
| PY05942 | 0.3126  | 0.0778  | -0.1117 | -0.0052 | 0.2593  | 0.1527  | 0.065   | 0.0508  | -0.0667 | -0.0639 | 0.0627  | -0.1271 |
| PY05259 | 0.2451  | 0.3339  | 0.3128  | 0.0093  | -0.3158 | 0.1444  | 0.5375  | -0.0033 | 0.3825  | -0.2822 | -0.2275 | 0.2618  |
| PY04228 | 0.052   | 0.3666  | 0.576   | -0.0975 | -0.4605 | -0.4118 | -0.1906 | -0.3012 | -0.1054 | -0.3963 | 0.0454  | -0.2601 |
| PY01916 | 0.2801  | -0.088  | -0.2998 | -0.2146 | 0.0595  | -0.0083 | -0.0772 | -0.1593 | -0.2032 | -0.5934 | -0.332  | 0.1035  |
| PY07826 | 0.1677  | 0.1974  | 0.1642  | 0.1248  | 0.2641  | 0.0874  | 0.044   | -0.034  | 0.3377  | 0.0435  | 0.2258  | 0.3289  |
| PY04854 | -0.2088 | -0.2038 | -0.0639 | -0.5509 | -0.1103 | 0.1087  | 0.3151  | 0.055   | -0.2475 | -0.2502 | -0.243  | 0.2577  |
| PY05935 | 0.1631  | 0.1778  | 0.3232  | 0.2092  | -0.6934 | 0.3998  | 0.1212  | -0.1164 | -0.0589 | -0.4413 | -0.2482 | -0.2964 |
| PY06107 | -1.321  | -0.4037 | -0.3041 | -0.4997 | 0.0668  | -0.1268 | -0.2118 | 0       | -0.1952 | -0.2236 | -0.1029 | -0.3254 |
| PY04958 | -0.2802 | -0.3158 | -0.0722 | -0.2184 | 0.0289  | -0.0212 | 0.0825  | -0.0343 | -0.9747 | -0.3293 | -0.0851 | 0.2189  |
| PY03689 | 0.6791  | -0.1714 | 0.704   | 0.1941  | 0.2119  | 0.1833  | 0.4171  | 0.222   | -0.0396 | 0.4333  | -0.0849 | 0.3585  |
| PY06652 | -0.6348 | 0.0346  | 0.2066  | -0.1183 | 0.0719  | 0.1925  | 0.0507  | 0.0724  | -0.072  | -0.3048 | -0.2659 | -0.7252 |
| PY06495 | 0.8394  | 0.6667  | 0.7032  | 0.6954  | -0.482  | 0.1375  | 0.2832  | -0.2033 | -0.021  | -0.3118 | -0.7591 | 0.0111  |
| PY04264 | 0.1338  | -0.1833 | -0.0856 | -0.651  | -0.3457 | 0.0187  | 0.2981  | -0.2602 | -0.0565 | -0.0982 | -0.1415 | 0.4196  |
| PY00474 | -0.0932 | 0.1504  | 0.126   | -0.9688 | -0.6201 | -0.1101 | -0.0308 | -0.3209 | 0.1969  | -0.6427 | -0.4225 | 0.2401  |
| PY06479 | -0.2353 | -0.071  | 0.326   | 0.5635  | 0.7055  | 0.1477  | 0.3073  | 0.1612  | 0.1607  | 0.1701  | 0.4353  | 0.1655  |
| PY02797 | -0.9971 | -0.5141 | -0.1239 | -0.1548 | -0.5439 | -0.2346 | -0.1643 | 0.2209  | 0.4182  | -0.0043 | 0.5361  | -0.1959 |
| PY03357 | 0.3473  | 0.2376  | 0.1551  | 0.0288  | -0.3491 | 0.1837  | 0.3242  | 0.2528  | 0.1918  | 0.3073  | -0.7273 | 0.8157  |
| PY02484 | -0.2836 | -0.1562 | -0.2282 | 0.8365  | 0.3705  | -0.0648 | -0.2667 | -0.0366 | -0.1857 | 0.0368  | 0.1389  | -0.1581 |
| PY02220 | 0.0285  | -0.3434 | -0.3448 | -0.1282 | 0.1346  | -0.2932 | -0.2848 | -0.2659 | -0.1518 | 0.0606  | -0.1373 | 0.0902  |
| PY00402 | -0.3622 | -0.084  | -0.3354 | -0.1303 | 0.229   | -0.0808 | 0.0009  | 0.1079  | -0.153  | 0.3769  | 0.0726  | -0.0329 |
| PY00347 | -0.3847 | -0.4745 | -0.5223 | -0.1765 | 0.3999  | -0.1034 | -0.1366 | -0.0136 | -0.3176 | 0.1251  | 0.5494  | 0.0892  |

|         |         |         |         |         |         |         |         |         |         |         |         |         |
|---------|---------|---------|---------|---------|---------|---------|---------|---------|---------|---------|---------|---------|
| PY00410 | 0.6829  | 0.4182  | 0.3479  | 0.2906  | 0.1278  | 0.0837  | 0.2776  | 0.0664  | -0.0675 | -0.0638 | -0.471  | -0.0998 |
| PY05450 | 0.4395  | 0.0027  | 0.025   | -0.5865 | 0.0874  | -0.0508 | -0.043  | -0.2833 | -0.4415 | -0.1969 | -0.0082 | 0.0111  |
| PY05970 | -0.2046 | 0.09    | 0.3551  | 0.1274  | -0.0996 | -0.3029 | 0.0462  | -0.052  | -0.027  | 0.2309  | 0.541   | 0.0778  |
| PY03903 | -0.3959 | -0.3059 | -0.3123 | -0.0873 | 1.169   | -0.0321 | -0.1603 | 0.0071  | -0.3702 | 0.0938  | -0.1376 | -0.0218 |
| PY04614 | 0.1361  | 0.2131  | 0.3664  | 0.5621  | -0.0165 | 0.1043  | 0.0191  | 0.1607  | 0.0719  | 0.2269  | -0.1958 | 0.213   |
| PY02611 | -1.5235 | -0.3939 | -0.5861 | 0.0048  | -0.938  | -0.2966 | 0.1036  | 0.3424  | 0.4322  | 0.7685  | 0.2781  | 0.0654  |
| PY00272 | -0.6874 | -0.4153 | -0.3994 | -0.2109 | -0.3286 | -0.0856 | 0.1169  | 0.3769  | 0.0471  | -0.0805 | 0.4138  | -0.3037 |
| PY00118 | -0.9842 | -0.0989 | -0.1109 | 0.3348  | -0.5147 | 0.1004  | -0.0575 | 0.4181  | -0.0218 | 0.1481  | 0.1465  | -0.3782 |
| PY02155 | -0.3928 | -0.2996 | -0.381  | 0.2613  | 0.2323  | -0.2486 | -0.488  | 0.0089  | 0.1992  | 0.2924  | 0.3303  | 0.2863  |
| PY03292 | 0.5861  | 0.1671  | -0.1625 | -0.1648 | 0.0732  | 0.1203  | -0.1125 | -0.3825 | -0.4469 | -0.2485 | -0.2229 | 0.0205  |
| PY05964 | -0.1044 | -0.0878 | -0.3279 | 0.4618  | 0.151   | -0.0318 | -0.0914 | -0.0922 | 0.0474  | 0.3984  | 0.4346  | 0.5111  |
| PY00722 | -0.449  | -0.1173 | -0.1065 | -0.15   | -0.038  | -0.3941 | -0.0255 | -0.1433 | 0.1688  | 0.0097  | 0.3992  | 0.3988  |
| PY04945 | 0.8657  | 0.2305  | 0.6139  | 0.583   | 0.1631  | 0.2195  | 0.1047  | -0.0797 | -0.2857 | -0.5801 | -0.5435 | -0.3099 |
| PY04093 | 0.2136  | -0.044  | 0.0804  | 1.5868  | 1.0503  | 0.7098  | -0.2288 | 0.3995  | -0.438  | 0.8198  | 0.3962  | -0.4456 |
| PY03876 | 0.1873  | 0.0938  | -0.0777 | 0.2304  | 0.0125  | 0.1922  | 0.081   | 0.5182  | 0.1856  | -0.2423 | 0.5112  | -0.209  |
| PY02129 | 0.0621  | 0.0145  | 0.0358  | 0.2063  | 0.4222  | -0.3199 | -0.3418 | -0.0659 | -0.4325 | -0.0025 | 0.1973  | 0.0511  |
| PY00702 | 0.7008  | 0.4144  | 0.6108  | -0.2282 | -0.2455 | 0.1419  | 0.5101  | 0.0167  | 0.2529  | -0.4585 | -0.182  | 0.3304  |
| PY07218 | -1.2581 | -0.7069 | -0.8383 | -0.8644 | 0.0543  | 0.4302  | 0.1783  | 0.3338  | -0.146  | -0.0432 | 0.2735  | -0.0483 |
| PY03287 | -0.3269 | -0.2465 | 0.3105  | -0.539  | -1.021  | -0.0244 | -0.0424 | -0.2072 | -0.1488 | -0.4506 | -0.7509 | -0.4902 |
| PY07634 | -0.1636 | -0.0612 | 0.0783  | 0.2901  | 0.2397  | 0.5143  | 0.1817  | 0.2472  | 0.1422  | 0.2675  | 0.2538  | 0.1137  |
| PY01955 | -1.4004 | -0.8025 | -0.5596 | -0.0491 | 0.115   | 0.1541  | 0.2133  | 0.3056  | 0.4138  | 0.1314  | 0.2197  | -0.5286 |
| PY01747 | -1.2843 | -0.6424 | -0.8559 | -0.5134 | -0.3615 | 0.2838  | -0.0485 | 0.5968  | -0.1991 | 0.4818  | 0.3213  | -0.3346 |
| PY01974 | -0.3489 | -0.2867 | -0.3348 | -0.1713 | -0.3314 | -0.1196 | 0.1067  | -0.0064 | -0.3693 | -0.08   | -0.5281 | -0.5626 |
| PY01954 | -0.1487 | 0.7112  | 0.3292  | 0.0276  | -0.2442 | -0.0465 | 0.8062  | 0.0568  | -0.0752 | 0.2548  | 0.0652  | 0.6745  |
| PY00369 | 0.2306  | 0.3692  | 0.4371  | 0.2516  | -0.5502 | -0.1922 | -0.3705 | -0.1406 | -0.0295 | 0.1612  | -0.1767 | -0.2538 |
| PY03026 | 0.516   | 0.6183  | 0.8804  | 0.0414  | -0.1423 | -0.187  | 0.258   | -0.1625 | 0.182   | 0.2414  | -0.3666 | 0.4129  |
| PY01585 | -0.804  | -0.5535 | -0.5669 | 0.1568  | -0.2657 | -0.0924 | -0.064  | 0.4002  | 0.3165  | 0.3793  | 0.8094  | 0.2386  |
| PY05200 | 0.6195  | 0.3607  | 0.4795  | 0.5791  | 0.1414  | -0.2194 | -0.1352 | -0.4518 | -0.5678 | -0.4458 | -0.5646 | -0.0635 |
| PY05039 | -0.3487 | 0.0211  | 0.1251  | -0.0357 | -0.4013 | 0.1301  | 0.252   | 0.2466  | 0.2867  | -0.3115 | -0.2658 | 0.0508  |
| PY00825 | 0.3081  | -0.0044 | -0.0647 | -0.0905 | -0.367  | -0.4192 | -0.2313 | -0.1076 | -0.1791 | -0.2051 | -0.004  | -0.0371 |
| PY02402 | 0.8767  | 0.5705  | -0.7613 | -0.5024 | 0.0272  | -0.2886 | -0.0557 | -0.2886 | -0.2416 | -0.0614 | -0.0089 | 0.2359  |
| PY00898 | 0.4647  | -0.0413 | 0.1201  | 0.3109  | 0.505   | 0.1847  | -0.0894 | -0.4469 | -0.5219 | -0.3263 | -0.433  | -0.1547 |
| PY07180 | -0.1904 | 0.089   | 0.4595  | 0.0606  | -0.5363 | 0.2123  | 0.5979  | 0.1474  | 0.7772  | 0.3098  | -0.2525 | 0.7339  |
| PY01070 | 0.6315  | 0.2401  | 0.451   | 0.3267  | -0.0314 | -0.0687 | -0.0611 | -0.2685 | 0.0555  | 0.0529  | -0.3787 | 0.3923  |
| PY00412 | 0.9248  | 0.2497  | 0.0714  | 0.4768  | 0.1071  | 0.0565  | 0.0381  | -0.3747 | -0.0021 | -0.8312 | -0.2214 | 0.0369  |
| PY03400 | 0.2232  | -0.1196 | 0.1566  | 0.987   | 0.3107  | -0.2449 | -0.7497 | 0.2211  | 0.2156  | 0.7307  | 0.3026  | 0.2516  |
| PY07389 | 0.3562  | 0.044   | 0.028   | -0.3584 | 0.0222  | -0.1029 | -0.0782 | -0.4359 | -0.1191 | -0.4864 | -0.3962 | 0.1407  |
| PY00963 | -1.1052 | -0.2321 | 0.2913  | -0.5724 | 0.0943  | 0.0423  | -0.0764 | -0.0726 | -0.1612 | -0.1901 | 0.2582  | -0.3735 |
| PY02937 | -0.5462 | -0.5224 | -0.1443 | 0.1713  | 0.0665  | -0.2429 | -0.2352 | -0.1341 | -0.0501 | -0.0632 | 0.3495  | 0.0149  |
| PY04385 | 0.3445  | 0.3346  | 0.8675  | -0.146  | 0.0865  | -0.148  | 0.3044  | -0.0413 | 0.405   | 0.1925  | 0.1284  | 0.4332  |
| PY03226 | 0.5587  | -0.0611 | 0.1052  | 0.2065  | 0.1917  | -0.2128 | 0.1222  | 0.1335  | -0.255  | 0.0487  | 0.0034  | 0.3925  |
| PY03129 | -0.223  | -0.3904 | -0.2112 | -0.7247 | -0.2688 | -0.2457 | -0.4381 | -0.0049 | -0.0118 | -0.0461 | 0.1482  | -0.4318 |
| PY03235 | 0.0309  | 0.2553  | 0.2864  | -0.2857 | -0.1621 | 0.2784  | 0.5252  | 0.1806  | 0.6177  | 0.064   | -0.0162 | 0.4694  |
| PY04036 | -0.7979 | -0.1111 | -0.396  | 0.2244  | -0.1123 | 0.1393  | 0.1373  | 0.63    | 0.5619  | 0.1824  | 0.7903  | -0.0675 |
| PY05070 | 0.5255  | -0.2449 | 0.1006  | 0.0351  | 0.168   | 0.2043  | -0.1614 | -0.2105 | -0.3934 | -1.1645 | -0.3899 | -0.3843 |
| PY06254 | -0.2749 | -0.5273 | -0.2158 | -0.4559 | 0.0993  | 0.2073  | 0.3685  | 0.2348  | 0.4585  | 0.0405  | 0.1841  | -0.3438 |
| PY03983 | 0.0335  | -0.0666 | -0.1175 | -0.3184 | 0.2904  | -0.0189 | 0.2722  | -0.2567 | -0.8115 | -0.2816 | 0.0559  | 0.0465  |
| PY01561 | 0.6044  | 0.2133  | -0.1961 | 0.8114  | 0.4621  | -0.0075 | -0.2694 | -0.0935 | -0.0716 | 0.312   | -0.3071 | -0.1983 |
| PY00717 | -1.0544 | -0.6071 | -0.0324 | 3.1733  | -0.2137 | -0.1542 | -0.0603 | 0.5398  | -0.388  | 0.4453  | 0.4014  | -0.1951 |
| PY03683 | -0.3183 | 0.1499  | 0.0336  | 0.0404  | 0.3878  | -0.169  | 0.0162  | -0.1126 | -0.2261 | -0.2123 | 0.127   | -0.2219 |
| PY00472 | -0.9169 | -0.7715 | -0.3862 | 0.3446  | -0.4345 | -0.3078 | -0.2896 | 0.2836  | 0.0738  | -0.1209 | 0.1827  | -0.4222 |
| PY02756 | 0.5549  | 0.0846  | 0.2253  | 0.1864  | 0.4523  | -0.0381 | -0.0192 | 0.0122  | 0.1042  | -0.129  | -0.1075 | 0.2101  |
| PY06075 | -0.3231 | -0.1498 | 0.2827  | 0.5138  | 0.1381  | -0.1578 | -0.0546 | 0.2439  | 0.2139  | 0.0468  | 0.633   | -0.0208 |
| PY07429 | 1.1628  | 0.7984  | 0.9409  | 0.3416  | -0.3128 | -0.1627 | 0.4297  | -0.0772 | 0.5163  | 0.0828  | -0.1309 | 0.9194  |
| PY05233 | -0.3435 | 0.0401  | 0.1621  | -0.8803 | -0.6495 | -0.2353 | -0.2962 | -0.2497 | -0.0647 | -0.7844 | -0.2005 | -0.267  |
| PY00249 | -0.5747 | -0.0477 | -0.486  | -0.2064 | 0.1163  | 0.0982  | 0.1598  | -0.1921 | -0.0605 | -0.3128 | -0.135  | 0.0321  |
| PY05962 | -0.4944 | -0.2326 | -0.4526 | -0.4447 | 0.0804  | 0.5728  | -0.0788 | 0.4814  | 0.1329  | 0.2047  | 0.2265  | -0.1613 |
| PY00985 | 0.3569  | 0.2269  | 0.1488  | -0.1766 | -0.2456 | -0.0305 | 0.1562  | -0.2877 | 0.0864  | 0.1208  | -0.2702 | 0.4636  |
| PY05778 | 0.9443  | 0.616   | 0.4013  | 0.2816  | -0.2708 | -0.1616 | 0.076   | -0.3652 | -0.1851 | -0.4762 | -0.7325 | -0.2513 |
| PY03377 | -0.0823 | 0.5568  | 0.0604  | 0.26    | 0.3771  | 0.0128  | -0.044  | 0.0314  | -0.0411 | 0.1466  | 0.3535  | 0.0426  |
| PY03343 | 0.3007  | -0.4675 | 0.0874  | 0.2249  | 0.5876  | -0.146  | -0.1296 | 0.0694  | -0.0734 | 0.3017  | 0.0495  | 0.1606  |
| PY06375 | 0.1081  | 0.0992  | 0.1521  | 0.7034  | 0.4338  | 0.3667  | -0.1495 | 0.335   | 0.0674  | 0.5765  | 0.6584  | -0.0445 |
| PY06588 | 0.1892  | -0.0076 | 0.1578  | 0.3199  | 0.2032  | 0.3252  | 0.3487  | 0.1675  | -0.19   | -0.0578 | -0.1906 | -0.1046 |

|         |         |         |         |         |         |         |         |         |         |         |         |         |
|---------|---------|---------|---------|---------|---------|---------|---------|---------|---------|---------|---------|---------|
| PY04894 | 0.3296  | 0.462   | 0.432   | 0.2956  | 0.0198  | 0.5162  | 0.4584  | -0.3448 | 0.1506  | 0.0036  | -0.3262 | 0.2158  |
| PY01413 | 0.2177  | 0.1004  | 0.3857  | -0.1816 | 0.1098  | 0.0163  | 0.1121  | 0.3331  | 0.1681  | 0.2169  | 0.8128  | 0.0884  |
| PY05355 | -0.1859 | 0.7793  | 2.0769  | -0.2679 | -0.9332 | -0.3507 | -0.1006 | -0.5706 | 0.0556  | -0.3005 | -1.3388 | -0.0102 |
| PY00528 | 0.4773  | 0.3394  | -0.0154 | -0.3742 | 0.0493  | -0.1786 | -0.0349 | -0.3189 | -0.1032 | -0.5274 | -0.0898 | -0.3594 |
| PY06927 | 0.029   | 0.2672  | 0.0893  | 0.4028  | 0.0512  | 0.1457  | 0.17    | 0.383   | 0.1086  | -0.0311 | 0.0332  | -0.2825 |
| PY01225 | -0.0393 | -0.0009 | 0.2622  | -0.1274 | 0.0888  | 0.2115  | 0.3577  | -0.0647 | 0.123   | -0.1202 | -0.2004 | 0.1498  |
| PY00501 | 0.1     | 0.3414  | 0.3763  | -0.091  | -0.2304 | 0.2444  | 0.655   | -0.1628 | 0.5599  | -0.4199 | -0.389  | 0.473   |
| PY03702 | -0.003  | -0.2648 | -0.239  | -0.8068 | -0.2242 | 0.1039  | 0.2668  | 0.1245  | 0.3864  | -0.2806 | -0.1726 | 0.2569  |
| PY00139 | -0.6131 | 0.0062  | 0.0657  | -0.5048 | -0.286  | -0.3572 | 0.0229  | 0.0212  | 0.1832  | 0.3517  | 0.2991  | -0.1997 |
| PY04971 | -0.4305 | -0.4778 | -0.1212 | 0.1976  | 0.285   | -0.138  | 0.0352  | -0.0605 | -0.1946 | 0.2385  | 0.1332  | -0.1071 |
| PY06632 | 0.6559  | 0.0755  | 0.1104  | -0.0326 | -0.1759 | -0.1163 | 0.1151  | 0.0674  | 0.287   | 0.5401  | 0.0513  | 0.3491  |
| PY03532 | -0.5202 | -0.1121 | -0.071  | -0.2217 | -0.1733 | -0.0979 | -0.0248 | -0.0824 | -0.1701 | -0.2105 | 0.0098  | -0.2665 |
| PY02696 | -0.8262 | -0.2644 | -0.1606 | -0.2843 | -0.2052 | 0.0928  | -0.1639 | 0.1553  | 0.0291  | -0.115  | -0.0138 | -0.4542 |
| PY07151 | 0.4827  | 0.1738  | 0.1599  | -0.2593 | -0.2398 | -0.2276 | -0.1745 | -0.1213 | 0.1438  | 0.5245  | 0.0892  | -0.2025 |
| PY00067 | -0.5237 | -0.1301 | -0.4074 | 0.2102  | -0.0076 | 0.2702  | -0.1676 | -0.1492 | -0.3681 | -0.2366 | -0.3506 | -0.4443 |
| PY07232 | -0.8501 | -0.1969 | -0.3288 | -0.2077 | -0.1022 | -0.0824 | 0.1231  | 0.0566  | 0.0757  | -0.0119 | 0.0874  | -0.0721 |
| PY02497 | -0.3605 | -0.1893 | -0.2633 | 0.1787  | 0.4703  | -0.0441 | -0.1503 | 0.0051  | -0.0637 | 0.0495  | 0.4482  | 0.0036  |
| PY01178 | -0.0144 | 0.0385  | 0.0894  | 1.0372  | 0.3455  | -0.2166 | -0.0102 | -0.2164 | 0.0227  | 0.5037  | 0.4808  | -0.0751 |
| PY03419 | -0.3929 | -0.0835 | -0.0398 | 0.471   | 0.7643  | 0.7723  | 0.0883  | 0.5449  | 0.0835  | 0.3334  | 0.5422  | -0.24   |
| PY00767 | -0.5057 | 0.0168  | 0.1616  | -0.3735 | -0.1742 | -0.0708 | -0.0388 | -0.0368 | -0.0944 | 0.4897  | 0.3749  | -0.2092 |
| PY01271 | 0.0191  | -0.098  | -0.2245 | 0.0129  | 0.5838  | 0.1059  | 0.0463  | -0.0822 | -0.2664 | 0.0738  | -0.0469 | 0.0216  |
| PY06452 | -0.9051 | -0.3344 | -0.0759 | -0.3964 | 0.3496  | -0.1757 | -0.1129 | -0.0794 | -0.1293 | 0.1188  | 0.5766  | -0.1922 |
| PY01828 | -0.9672 | -0.4698 | -0.1514 | 0.1665  | 0.1339  | 0.1057  | 0.0365  | 0.0724  | -0.1236 | -0.15   | 0.033   | -0.0762 |
| PY05067 | 0.3165  | -0.1096 | -0.1654 | -0.1286 | 0.1014  | -0.0925 | -0.0256 | -0.2232 | -0.545  | 0.011   | -0.2995 | -0.8282 |
| PY06220 | 0.7231  | 0.4395  | -0.0831 | 0.3113  | 0.0827  | -0.2391 | -0.1287 | -0.019  | 0.0033  | -0.3907 | -0.2217 | -0.3553 |
| PY01058 | 0.0059  | -0.0389 | 0.7636  | -0.0688 | -0.3626 | -0.125  | 0.1982  | -0.309  | -0.2191 | -1.609  | -0.5792 | -0.4061 |
| PY01991 | -0.2407 | -0.1821 | -0.0135 | 0.5226  | 0.0213  | 0.151   | 0.0738  | 0.3136  | 0.1308  | 0.7073  | 0.5866  | 0.0562  |
| PY06952 | 0.4767  | 0.082   | -0.5164 | 0.409   | -0.0195 | -0.2016 | -0.2281 | -0.1795 | -1.1233 | -0.393  | -0.508  | -0.0352 |
| PY07488 | -0.2057 | -0.113  | -0.1339 | 0.2354  | -1.4203 | 0.0421  | -0.1367 | 0.1856  | 0.1104  | 0.3329  | 0.1198  | 0.3769  |
| PY05613 | 0.5505  | 0.3994  | 0.48    | 0.0471  | -0.0427 | 0.0951  | 0.0839  | -0.0492 | -0.096  | -0.0411 | -0.1358 | 0.021   |
| PY06637 | -1.5677 | -0.1272 | 0.2533  | -1.0611 | -0.8326 | -0.7332 | -0.4674 | 0.0848  | 0.2365  | 0.2151  | 0.8426  | -0.2774 |
| PY01969 | -0.2117 | 0.0018  | 0.0234  | -0.1754 | -0.2045 | 0.5395  | 0.149   | 0.0293  | -0.2169 | -0.4481 | -0.6303 | -0.5006 |
| PY06504 | 0.8022  | 0.2169  | 0.0306  | 0.1976  | 0.2087  | 0.0061  | -0.2433 | -0.4641 | -0.2721 | -0.1387 | -0.7069 | 0.0132  |
| PY02239 | -1.1352 | -0.174  | -0.03   | -0.3804 | 0.0485  | 0.2131  | 0.2848  | 0.246   | 0.184   | -0.0377 | 0.4297  | -0.1558 |
| PY00449 | -0.0014 | 0.2756  | 0.4839  | 0.3062  | -0.1378 | 0.2525  | 0.5746  | 0.4389  | 0.3787  | 0.1535  | 0.1901  | -0.0627 |
| PY04535 | 0.1191  | 0.0174  | 0.446   | 0.1975  | -0.1135 | 0.0749  | 0.0978  | -0.0036 | -0.2221 | -0.0199 | -0.3706 | -0.3974 |
| PY06896 | 0.32    | 0.3498  | -0.4648 | -0.4081 | -0.1494 | -0.4347 | -0.4103 | -0.243  | -0.1477 | -0.4279 | -0.0434 | -0.5461 |
| PY00325 | -0.7751 | -0.7779 | -0.4971 | 0.3656  | 0.1745  | 0.0529  | -0.2527 | 0.259   | -1.0856 | 0.3533  | 0.0166  | -0.3093 |
| PY04122 | -0.1818 | -0.2193 | -1.3698 | -0.3226 | 0.3458  | -0.2435 | -0.2747 | -0.0582 | -0.2574 | -0.0323 | -0.0116 | -0.185  |
| PY03250 | -0.3031 | -0.0699 | -0.3304 | 0.0919  | 0.1381  | 0.446   | -0.086  | 0.0732  | 0.1793  | -0.297  | 0.04    | -0.2465 |
| PY01525 | -0.7057 | -0.1418 | 0.1619  | -0.3477 | 0.0671  | -0.3392 | -0.1685 | -0.4228 | 0.0775  | -0.2074 | 0.1465  | 0.0119  |
| PY01261 | -1.1681 | -0.4546 | -0.149  | -0.628  | 0.0796  | 0.1835  | -0.054  | 0.3528  | 0.0623  | -0.2607 | 0.4933  | -0.5423 |
| PY05620 | 0.5948  | 0.1723  | 0.3377  | -0.1887 | -0.2105 | 0.047   | 0.0547  | -0.1974 | 0.1902  | 0.0021  | -0.3459 | 0.2393  |
| PY01158 | 0.3475  | -0.013  | 0.2574  | 0.1533  | -0.1533 | -0.0528 | 0.0442  | -0.2014 | 0.0289  | -0.3519 | -0.429  | 0.1057  |
| PY00350 | 0.3131  | 0.1719  | -0.0213 | -0.3363 | -0.1878 | 0.0726  | -0.0826 | -0.1595 | -0.0381 | -0.1692 | -0.1641 | -0.3267 |
| PY06839 | -0.3191 | -0.1947 | -0.2822 | 0.0876  | 0.5255  | -0.0855 | -0.4421 | 0.0894  | 0.0935  | 0.1415  | 0.2179  | -0.115  |
| PY04546 | 1.33    | 0.5725  | 0.8277  | 0.5877  | -0.5164 | -0.1385 | 0.1932  | -0.4104 | 0.068   | -0.2266 | -0.8135 | 0.1984  |
| PY03370 | 0.3482  | 0.3022  | 0.2597  | 0.2083  | 0.0044  | 0.1788  | 0.2125  | -0.0173 | 0.2254  | 0.1324  | -0.1794 | 0.0739  |
| PY02161 | 0.1307  | 0.3432  | 0.5075  | -0.485  | -0.6957 | 0.3557  | 1.0246  | 0.4558  | 0.6499  | 0.0954  | 0.1716  | 0.4352  |
| PY06299 | 0.5806  | 0.5447  | 0.39    | -0.4716 | -0.6034 | 0.1478  | 0.0477  | -0.2238 | -0.0427 | -0.4807 | -0.7071 | -0.1945 |
| PY01539 | -0.6538 | -0.1766 | -0.7409 | -0.6591 | -0.2399 | -0.3622 | -0.2669 | 0.3017  | -0.0786 | 0.3394  | 0.5394  | 0.1983  |
| PY01010 | -0.3817 | -0.4251 | -0.1909 | -0.2154 | 0.2498  | 0.3578  | 0.1686  | -0.0151 | -0.0886 | -0.2559 | -0.1133 | -0.0298 |
| PY01827 | -0.4704 | -0.0867 | 0.1296  | 0.1394  | 0.2796  | 0.3089  | -0.0104 | -0.3756 | 0.0674  | 0.085   | 0.4734  | -0.084  |
| PY07543 | -0.2511 | 0.2039  | -0.2532 | -0.1957 | 0.0953  | -0.0708 | -0.182  | 0.128   | -0.0892 | -0.1566 | 0.0738  | -0.2953 |
| PY05503 | 0.3904  | 0.1463  | 0.224   | -0.2086 | 0.0127  | 0.0323  | -0.1116 | -0.1078 | -0.0362 | 0.0454  | -0.3546 | 0.1635  |
| PY07055 | -0.173  | -0.1199 | -0.2341 | 0.587   | 0.0195  | 0.3225  | 0.0933  | -0.0959 | -0.0376 | -1.8035 | -0.1904 | 0.0398  |
| PY01113 | 0.004   | 0.3256  | 0.6526  | -0.3291 | -0.2211 | -0.2612 | -0.271  | -0.0978 | 0.0324  | -0.0555 | 0.1602  | -0.4365 |
| PY00160 | 0.5322  | 0.76    | 0.6469  | -0.2587 | -0.659  | 0.0994  | 0.2561  | 0.0789  | 0.5454  | -0.0842 | -0.1501 | 0.2273  |
| PY05305 | -0.5556 | 0.0544  | 0.2471  | -0.4782 | -0.0336 | -0.124  | -0.0427 | 0.051   | 0.1348  | 0.0554  | 0.0863  | 0.063   |
| PY03578 | 1.1733  | 0.5601  | 0.814   | -0.1574 | -0.727  | -0.2183 | 0.4911  | -0.3066 | 0.4259  | -0.5665 | -1.2036 | 0.492   |
| PY01918 | -0.963  | -0.4733 | -0.4479 | 0.0132  | 0.0141  | 0.2519  | 0.2485  | 0.7743  | 0.1773  | 0.5256  | 0.537   | -0.7644 |
| PY01249 | 0.4497  | 0.2071  | -0.1713 | 0.2732  | 0.0637  | 0.3336  | 0.0434  | -0.1394 | -0.1153 | -0.3438 | -0.1054 | -0.2071 |
| PY02983 | -0.3417 | 0.1855  | 0.0539  | -0.2739 | -0.0513 | -0.0919 | 0.1983  | 0.0199  | 0.2263  | -0.129  | 0.2835  | -0.2746 |

|         |         |         |         |         |         |         |         |         |         |         |         |         |
|---------|---------|---------|---------|---------|---------|---------|---------|---------|---------|---------|---------|---------|
| PY02072 | 0.3232  | -0.0636 | -0.049  | -0.4042 | 0.2744  | -0.4276 | -0.6142 | -0.3596 | -0.4842 | -0.4144 | -0.1432 | 0.0354  |
| PY02356 | -0.5747 | -0.6492 | -0.4976 | -1.1774 | 0.1904  | 0.0309  | -0.052  | -0.1551 | 0.1701  | -0.3045 | 0.3504  | -0.0794 |
| PY02583 | 0.558   | 0.3886  | 0.358   | 0.2786  | 0.2076  | 0.2786  | 0.293   | 0.2543  | 0.1025  | 0.3081  | -0.092  | 0.344   |
| PY00967 | 0.5312  | 0.2171  | 0.1064  | 0.2427  | 0.258   | -0.1216 | -0.0702 | -0.3272 | -0.1967 | -0.1847 | -0.192  | 0.1252  |
| PY05331 | -0.5084 | 0.1283  | 0.1881  | 0.469   | 0.5122  | 0.2936  | -0.08   | 0.0427  | 0.1227  | 0.5397  | -0.1241 | -0.3125 |
| PY02023 | 0.0737  | 0.0625  | 0.1474  | -0.698  | -0.0901 | -0.1103 | -0.1039 | -0.0673 | -0.0196 | -0.7279 | 0.0044  | -0.1891 |
| PY04519 | 0.2981  | 0.1528  | 0.0319  | -0.4679 | 0.0101  | -0.3158 | 0.0473  | -0.1651 | -0.0039 | -0.2658 | -0.1245 | 0.1829  |
| PY03079 | -0.8641 | -0.1056 | 0.1054  | -0.5766 | -0.1501 | -0.1795 | 0.0394  | 0.3516  | 0.4785  | 0.1034  | 0.0974  | 0.437   |
| PY01256 | -0.2317 | -0.2895 | -0.0375 | 0.5627  | 0.8446  | -0.0145 | -0.2357 | 0.2327  | 0.1592  | 0.3797  | 0.5422  | -0.0169 |
| PY02878 | -0.5663 | -0.1115 | -0.0004 | -0.5492 | -0.6223 | -0.4977 | -0.2907 | -0.091  | -0.3835 | 0.0327  | -0.0263 | 0.2042  |
| PY01090 | -0.7469 | 0.2536  | 0.5706  | -0.0109 | -0.5917 | -0.2692 | -0.0784 | -0.0065 | 0.2629  | -0.6705 | -0.0897 | -0.6769 |
| PY04408 | 0.388   | -0.1914 | 0.2647  | 0.5387  | 0.0325  | 0.0347  | -0.307  | -0.0416 | 0.0392  | -0.1288 | -0.4532 | -0.7213 |
| PY04642 | 0.2523  | -0.1304 | -0.4504 | 0.1749  | -0.0895 | -0.1016 | -0.234  | -0.0537 | -0.2085 | 0.1306  | -0.1365 | 0.0983  |
| PY04382 | 0.3188  | 0.0872  | 0.1147  | 0.3161  | -0.2245 | 0.102   | 0.1515  | -0.0012 | 0.0649  | -0.3078 | -0.6319 | 0.2388  |
| PY03297 | 0.2878  | 0.1058  | 0.6305  | -0.0104 | -0.1076 | 0.1281  | 0.2145  | 0.0476  | 0.2948  | -0.2492 | -0.3558 | 0.1613  |
| PY03845 | -0.6878 | -0.3303 | -0.4339 | -0.44   | -0.59   | -0.2706 | 0.4569  | 0.0758  | 0.4841  | -0.0315 | 0.3098  | 0.6307  |
| PY01197 | -0.5421 | -0.0257 | 0.385   | 0.4419  | -0.2369 | -0.4473 | -0.1078 | 0.2047  | 0.3535  | -0.0051 | -0.0607 | 0.0572  |
| PY02656 | 0.0082  | 0.2071  | -0.021  | -0.4607 | -0.3657 | 0.0353  | 0.1987  | 0.0871  | 0.1626  | -0.6914 | -0.2247 | 0.2378  |
| PY03384 | -0.7624 | -0.1234 | -0.2441 | 0.1231  | -0.0536 | -0.2493 | -0.1945 | 0.0732  | 0.0217  | 0.0191  | 0.281   | -0.0106 |
| PY00687 | 0.2775  | 0.0003  | -0.2881 | 0.9697  | 0.1311  | 0.0445  | -0.3084 | 0.0609  | -0.1794 | 0.5774  | 0.1454  | -0.1334 |
| PY05297 | -0.1084 | 0.1269  | -0.1867 | -0.0229 | -0.3391 | 0.0235  | 0.088   | 0.3554  | 0.2579  | 0.108   | 0.287   | -0.2375 |
| PY07022 | 0.1884  | 0.103   | 0.1777  | -0.3074 | -0.002  | -0.1522 | 0.2528  | -0.1621 | -0.0396 | -0.5431 | -0.2269 | -0.0484 |
| PY05340 | -0.5409 | -0.2889 | -0.6165 | 0.5364  | 0.0166  | -0.2449 | -0.1532 | 0.4427  | 0.3288  | 0.7157  | 0.7482  | 0.5662  |
| PY00228 | -0.5639 | -1.1663 | -0.9219 | -0.6462 | -0.136  | -0.1476 | -0.1357 | 0.0217  | -0.7485 | -0.1779 | 0.0579  | -1.3442 |
| PY06779 | -0.4299 | 0.1365  | 0.0661  | -0.7253 | -0.5835 | -0.3746 | -0.2106 | -0.1247 | 0.1702  | -0.1116 | 0.2264  | -0.0629 |
| PY01799 | 0.3947  | 0.0745  | -0.2007 | 0.5913  | -0.049  | -0.0857 | 0.1558  | 0.2495  | 0.1334  | 0.8159  | 0.1348  | 0.9407  |
| PY01087 | -0.4118 | 0.1064  | 0.221   | -0.0317 | -0.5262 | 0.4997  | 0.6545  | 0.2077  | 0.5094  | 0.131   | -0.2002 | 0.3523  |
| PY05745 | 0.0709  | 0.0289  | 0.0573  | 0.3016  | 0.1032  | 0.1489  | 0.0101  | 0.1087  | 0.2391  | 0.3556  | 0.0404  | 0.4505  |
| PY03673 | -0.2884 | 0.1209  | 0.1904  | 0.1408  | 0.2251  | 0.0618  | -0.1224 | 0.023   | 0.0325  | -0.358  | -0.0604 | -0.1098 |
| PY00720 | 0.1007  | 0.3866  | 0.0156  | -1.1583 | 0.3213  | -0.0673 | 0.0473  | -0.2502 | 0.187   | -0.3666 | 0.0624  | -0.1928 |
| PY02894 | 0.0709  | -0.05   | -0.4484 | 0.2134  | 0.0564  | 0.0082  | 0.0569  | 0.2222  | 0.2825  | 0.2655  | 0.2336  | 0.4461  |
| PY00193 | 0.2694  | 0.1135  | 0.0521  | -0.3553 | -0.0603 | -0.3092 | 0.0231  | -0.4149 | 0.0758  | -0.0223 | -0.0768 | 0.3337  |
| PY04029 | 0.2538  | -0.0308 | -0.1542 | 0.0458  | 0.2766  | 0.2119  | -0.0994 | -0.5231 | -0.1372 | -0.2128 | -0.3811 | -0.3334 |
| PY03018 | 0.2965  | 0.1406  | 0.1946  | 0.9739  | 0.3947  | -0.1428 | 0.0736  | -0.9985 | 0.1622  | 0.7313  | 0.0341  | 0.0832  |
| PY01568 | 0.5258  | 0.0153  | -0.9015 | -0.7303 | -0.5166 | -0.5541 | -0.1563 | 0.1745  | 0.0772  | 0.0628  | 0.5971  | -0.2384 |
| PY03815 | 0.0584  | 0.0841  | -0.1779 | 0.4875  | 0.2891  | -0.1183 | -0.0292 | 0.3083  | -0.0712 | -0.0814 | 0.5462  | 0.1182  |
| PY02820 | -0.5257 | -0.1374 | -0.415  | -0.5906 | -0.056  | -0.1001 | -0.0116 | -0.0168 | 0.3282  | -0.3089 | -0.0975 | 0.0299  |
| PY03736 | -0.3046 | -0.0005 | -0.0466 | -0.1796 | -0.1003 | 0.2103  | 0.1583  | 0.1607  | 0.236   | -0.3227 | -0.01   | -0.1727 |
| PY05856 | -0.8909 | 0.3134  | 0.6268  | -0.1291 | -0.5197 | 0.0678  | 0.3179  | 0.413   | 0.34    | 0.2481  | 0.5455  | 0.0895  |
| PY07067 | 0.0567  | -0.1627 | -0.2153 | 0.2323  | 0.2137  | 0.1467  | 0.1173  | 0.3405  | -0.0321 | 0.4751  | -0.0472 | 0.0152  |
| PY02711 | -0.2262 | -0.1681 | -0.0903 | -0.6674 | -0.4067 | 0.1181  | 0.3267  | 0.0334  | 0.4037  | -0.2656 | -0.2625 | 0.1949  |
| PY06148 | 1.0518  | 0.4844  | 0.8614  | 0.4697  | 0.0652  | 0.0854  | 0.5445  | -0.0844 | 0.2578  | -0.0758 | -0.2474 | 0.4997  |
| PY02414 | -0.0643 | 0.218   | -0.6797 | -0.8341 | -0.4341 | -0.5194 | -0.3677 | 0.0985  | -0.0256 | -0.2354 | 0.3337  | -0.4812 |
| PY04177 | -0.6234 | -0.6824 | -0.8102 | 0.1339  | 0.3805  | -0.1555 | -0.4248 | 0.1202  | -0.2147 | -0.09   | 0.2362  | 0.0491  |
| PY07451 | 0.196   | 0.1009  | 0.4512  | -0.3498 | -0.4234 | -0.07   | 0.0769  | -0.1011 | 0.2727  | -0.0214 | -0.1106 | 0.0101  |
| PY05158 | -0.0784 | -0.1163 | -0.369  | 0.4419  | 0.3369  | -0.0593 | -0.0867 | 0.2333  | -0.1515 | 0.1767  | 0.5558  | 0.3137  |
| PY02266 | 1.0059  | 0.5733  | 0.5741  | 0.3371  | 0.1813  | 0.0196  | 0.0779  | -0.3653 | 0.058   | -0.1447 | -0.3653 | 0.1088  |
| PY01886 | 1.0331  | 0.6245  | 0.5517  | 0.1036  | -0.5426 | 0.1648  | 0.1978  | -0.2765 | -0.0068 | -0.3548 | -0.794  | 0.0376  |
| PY05271 | -1.0592 | -0.4888 | -0.6238 | -0.0796 | 0.1873  | -0.0854 | -0.0253 | -0.1381 | 0.0264  | -0.1751 | 0.3078  | 0.4872  |
| PY01661 | 0.4033  | -0.1063 | -0.0932 | -0.0565 | -0.0608 | -0.3493 | -0.072  | -0.2364 | -0.2384 | -0.092  | 0.2682  | -0.0994 |
| PY00885 | -0.182  | 0.1865  | 0.2732  | 0.3745  | 0.6114  | -0.2055 | -0.0785 | -0.1781 | -0.1158 | -0.0954 | -0.0041 | -0.1604 |
| PY00218 | 0.344   | -0.4162 | -0.4346 | -0.3306 | -0.9513 | -0.201  | -0.5212 | -0.9061 | -0.5558 | -0.7357 | -1.2936 | -0.1919 |
| PY06607 | -0.4968 | -0.4136 | -0.2074 | 0.2231  | 0.4836  | 0.0425  | -0.2724 | -0.0189 | -0.1433 | -0.0275 | 0.0043  | -0.1588 |
| PY01758 | -0.7288 | -0.0429 | 0.7526  | -0.2971 | -0.0824 | 0.3349  | 0.0352  | -0.1402 | -0.2987 | -0.073  | -0.1412 | -0.1622 |
| PY03003 | -0.7659 | -0.3238 | -0.3876 | 0.589   | 0.49    | -0.0127 | -0.2224 | 0.126   | -0.1698 | 0.518   | 0.4635  | 0.2278  |
| PY01943 | -0.1618 | -0.0544 | 0.3058  | 0.1741  | -0.1511 | -0.0468 | 0.234   | -0.2226 | 0.1317  | -0.4762 | -0.2461 | 0.2932  |
| PY05161 | 0.725   | -0.1075 | -0.0111 | 0.2598  | 0.1107  | -0.1717 | -0.0189 | 0.1408  | -0.2343 | 0.0752  | -0.3364 | 0.0078  |
| PY01575 | 0.1375  | 0.0787  | 0.0053  | -1.0795 | -0.214  | -0.2233 | -0.0068 | -0.2477 | -0.2089 | -0.4085 | -0.2296 | -0.0515 |
| PY00261 | -0.0625 | -0.2776 | 0.1001  | 0.2064  | -0.2944 | -0.0824 | 0.1322  | 0.3199  | 0.0809  | 0.259   | 0.7642  | 0.0855  |
| PY05046 | 0.5521  | 0.2974  | 0.2946  | -1.0387 | -0.2789 | -0.3077 | 0.0649  | -0.387  | -0.1682 | -0.504  | -0.2094 | 0.1019  |
| PY05820 | -0.9681 | 0.1001  | 0.4007  | 0.1508  | 0.4799  | -0.061  | -0.1751 | 0.065   | 0.0753  | 0.3271  | -0.053  | -0.3047 |
| PY07227 | 0.0986  | -0.0837 | 0.0136  | 0.5796  | -0.0183 | -0.3298 | -0.2425 | -0.0511 | -0.1203 | 0.3654  | 0.2086  | 0.371   |
| PY05763 | 0.7993  | 0.0318  | 0.037   | -0.2465 | -0.47   | 0.3983  | 0.7503  | 0.0265  | 0.3224  | 0.0888  | -0.825  | 0.6326  |

|         |         |         |         |         |         |         |         |         |         |         |         |         |
|---------|---------|---------|---------|---------|---------|---------|---------|---------|---------|---------|---------|---------|
| PY01731 | 0.075   | -0.0238 | -0.0409 | 0.4565  | 0.5694  | 0.2403  | 0.125   | -0.1743 | -0.1918 | 0.249   | -0.2574 | 0.0177  |
| PY03152 | 0.6033  | 0.2444  | 0.2133  | -0.1511 | 0.3684  | 0.2284  | 0.3489  | -0.1652 | 0.2657  | -0.4367 | 0.0478  | 0.3016  |
| PY03247 | -0.0901 | -0.0391 | 0.0422  | -0.362  | -0.0813 | -0.121  | -0.0072 | -0.1518 | -0.1613 | -0.2775 | -0.2051 | -0.0319 |
| PY02222 | 0.4039  | 0.1082  | 0.1792  | 0.0568  | 0.1985  | 0.2114  | 0.2825  | -0.1239 | 0.0167  | -0.1408 | -0.2957 | 0.1059  |
| PY04835 | -0.05   | -0.0052 | 0.1682  | -0.0918 | -0.0468 | 0.0139  | 0.6019  | -0.1389 | 0.2029  | -0.5076 | 0.0008  | -0.3162 |
| PY01310 | -0.0287 | -0.3542 | -0.1599 | 0.0015  | 0.07862 | -0.0243 | -0.199  | -0.2315 | -0.4436 | -0.2318 | -0.331  | -0.2052 |
| PY00716 | -0.9795 | -0.2982 | 0.1893  | -0.7969 | -0.6405 | -0.6323 | -0.2848 | -0.3698 | 0.0173  | 0.1916  | 0.5281  | 0.2083  |
| PY06522 | 0.4531  | 0.1365  | 0.1166  | -0.3313 | 0.1054  | 0.1308  | 0.1923  | -0.1114 | 0.1636  | 0.0447  | 0.0298  | 0.1841  |
| PY02211 | -0.2256 | 0.047   | -0.0668 | -0.1402 | -0.0468 | 0.1505  | 0.0712  | 0.1127  | 0.0745  | -0.0635 | -0.0581 | 0.1842  |
| PY03275 | -0.0664 | -0.1406 | 0.0469  | 0.1141  | 0.0825  | -0.0655 | -0.0918 | 0.2368  | -0.1662 | 0.495   | 0.3983  | -0.0544 |
| PY06331 | 0.0327  | -0.1473 | -0.0159 | 0.0857  | 0.4962  | -0.1221 | 0.2284  | -0.0325 | 0.1718  | 0.2393  | 0.6064  | 0.3382  |
| PY07496 | -0.2566 | -0.0272 | -0.6632 | -0.2886 | -0.2154 | 0.1224  | 0.0601  | 0.3688  | 0.2748  | 0.0987  | 0.3424  | 0.2724  |
| PY00320 | -0.0452 | -0.2611 | -0.0884 | 0.8161  | 0.6651  | 0.3565  | -0.1892 | 0.3923  | -0.0568 | 0.3691  | 0.8965  | -0.105  |
| PY04172 | -1.0356 | -0.4522 | 0.0832  | -0.3434 | -0.0468 | -0.2237 | -0.1086 | -0.0275 | -0.146  | -0.5811 | 0.1001  | -0.3747 |
| PY02938 | -0.4695 | -0.2774 | -0.3627 | 0.3784  | 0.4805  | -0.051  | -0.2921 | -0.1387 | -0.0084 | 0.24    | 0.1793  | 0.0882  |
| PY02227 | 0.1639  | -0.2059 | -0.0522 | -0.3612 | -0.0746 | 0.1106  | 0.2238  | 0.1921  | 0.2853  | -0.2239 | -0.1456 | -0.338  |
| PY04230 | -0.0287 | -0.1634 | -0.2118 | 0.41    | -0.0984 | -0.2961 | -0.1391 | 0.0726  | -0.2497 | -0.0777 | 0.3115  | -0.0096 |
| PY05985 | -1.121  | -0.2962 | 0.5616  | 0.1389  | -0.3075 | -0.6972 | -0.4998 | -0.182  | 0.0437  | 0.363   | 0.1436  | -0.0625 |
| PY01848 | -0.1123 | -0.0425 | 0.0184  | -0.0908 | -0.374  | -0.3519 | -0.2958 | 0.2917  | -0.0189 | 0.3667  | 0.3448  | -0.1554 |
| PY01041 | -0.0385 | -0.0083 | 0.0727  | 0.0459  | -0.5379 | -0.121  | -0.0493 | -0.0167 | -0.0201 | 0.8794  | -0.0125 | 0.1264  |
| PY06135 | -0.0974 | 0.3108  | 0.3103  | -0.3323 | -0.4787 | -0.0668 | 0.0737  | -0.0062 | 0.26    | -0.1647 | -0.0738 | -0.2425 |
| PY02292 | -0.9493 | -0.1183 | -1.3051 | -1.3329 | -0.9953 | -0.8192 | 0.1666  | 0.0056  | 0.2067  | 0.3214  | 1.1635  | 0.636   |
| PY02405 | 0.5515  | 0.5276  | 0.0298  | 0.4603  | 0.394   | -0.072  | -0.0229 | 0.0173  | 0.1027  | 0.6144  | 0.1147  | 0.2757  |
| PY01038 | -1.1228 | -0.6747 | -1.0625 | -0.5286 | -0.1111 | -0.1486 | -0.1895 | 0.2147  | 0.0667  | 0.1176  | 0.3869  | -0.2211 |
| PY06809 | 0.1333  | -0.1562 | 0.0095  | 0.3171  | 0.2665  | 0.1141  | 0.0032  | -0.0335 | -0.2549 | -0.0789 | -0.2988 | -0.1841 |
| PY01371 | -0.1107 | -0.2889 | -0.7469 | 0.3533  | 0.568   | 0.0756  | -0.2227 | 0.0005  | -0.1642 | 0.4013  | 0.0255  | 0.0524  |
| PY04679 | 1.0072  | 0.5532  | 0.2091  | 0.0763  | -0.2863 | 0.1407  | 0.6831  | -0.0233 | 0.2266  | 0.1575  | -0.6444 | 0.7709  |
| PY02457 | -0.3255 | -0.2171 | -0.005  | -0.1809 | 0.4267  | 0.5415  | 0.0559  | 0.0293  | -0.1834 | -0.2051 | 0.2482  | 0.0567  |
| PY05542 | 0.0426  | 0.0699  | 0.1125  | 0.1185  | -0.3207 | -0.4138 | 0.0248  | -0.0331 | -0.1055 | -0.0337 | -0.2242 | 0.1191  |
| PY01641 | -0.2351 | -0.1744 | -0.3873 | 0.5534  | 0.067   | 0.0489  | -0.1549 | 0.1545  | -0.1235 | 0.3691  | 1.0323  | 0.0208  |
| PY04439 | -0.0896 | -0.3643 | -0.2759 | -0.5942 | 0.115   | 0.0704  | -0.1471 | -0.1925 | -0.0982 | -0.4858 | -0.0144 | 0.2857  |
| PY00038 | 0.7951  | -0.0506 | 0.313   | 0.7395  | 0.5434  | 0.2483  | -0.045  | -0.1031 | -0.0487 | -0.0206 | -0.1626 | 0.0291  |
| PY00046 | 0.06    | 0.321   | -0.0006 | -0.4142 | -0.2209 | -0.3286 | -0.452  | -0.2229 | -0.3145 | -0.1452 | 0.3922  | -0.6432 |
| PY01835 | -0.184  | 0.0482  | 0.0582  | 0.6759  | 0.3988  | 0.3718  | 0.1726  | 0.184   | 0.1022  | 0.2717  | 0.0936  | -0.0307 |
| PY01201 | -0.6089 | -0.2414 | 0.0424  | 0.0765  | 0.1718  | 0.2342  | -0.05   | 0.0162  | -0.0946 | 0.2762  | 0.3749  | -0.1098 |
| PY05223 | -0.1943 | -0.062  | 0.2508  | 0.0827  | -0.0009 | 0.2451  | 0.0951  | 0.0755  | -0.0714 | -0.0124 | -0.3287 | 0.1329  |
| PY02304 | 0.0714  | 0.2969  | 0.317   | 0.6964  | -0.7643 | 0.3647  | 0.4244  | 0.1591  | 0.0683  | 0.3672  | -0.0975 | 0.3201  |
| PY05641 | 0.8989  | 0.2521  | -0.1793 | 0.0618  | -0.2471 | -0.1082 | -0.3014 | -0.3567 | -0.2633 | -0.1034 | -0.7556 | -0.1709 |
| PY07278 | 0.1692  | 0.0609  | -0.2616 | -0.4161 | -0.4678 | -0.7384 | -0.2037 | -0.2101 | -0.0496 | -0.4322 | -0.1702 | -0.4426 |
| PY02479 | 0.0104  | -0.2173 | -0.3753 | -0.1077 | 0.2435  | 0.0325  | -0.0776 | -0.0073 | -0.1702 | -0.0385 | -0.1129 | -0.0192 |
| PY05818 | -0.3637 | -0.6077 | -0.4096 | -0.4383 | 0.2253  | -0.2801 | -0.0617 | 0.5376  | 0.127   | 0.03    | 0.6623  | -0.0262 |
| PY06958 | -0.9247 | -0.0283 | 0.1845  | -0.3015 | -0.3412 | -0.131  | -0.237  | 0.1658  | 0.0275  | -0.2475 | 0.2598  | -0.4152 |
| PY06808 | -0.3587 | 0.0389  | -0.434  | -0.227  | -0.2963 | -0.2212 | 0.1217  | -0.0077 | 0.2992  | 0.0825  | -0.1455 | -0.0896 |
| PY04008 | -0.2265 | -0.0093 | -0.1868 | 0.2303  | -0.233  | -0.147  | -0.1061 | -0.0052 | -0.0564 | -0.1082 | -0.0789 | -0.1345 |
| PY04103 | -0.1389 | -0.3374 | -0.1649 | 0.1378  | 1.1818  | 0.1136  | -0.0296 | -0.5902 | -0.0109 | 0.1983  | -0.7534 | -0.0825 |
| PY07010 | -0.3784 | -0.3712 | -0.1367 | 0.0615  | 0.4111  | -0.2815 | -0.1612 | 0.044   | 0.1097  | 0.5006  | 0.2601  | 0.2757  |
| PY01048 | 0.154   | 0.1143  | 0.3243  | 0.2475  | -0.1997 | -0.1993 | -0.1054 | -0.4994 | -0.162  | -0.0706 | -0.3808 | -0.192  |
| PY01532 | -0.5012 | -0.0638 | -0.183  | 0.0396  | 0.2646  | 0.2836  | -0.101  | 0.2839  | 0.0051  | 0.0234  | 0.413   | -0.04   |
| PY00419 | -0.9244 | -0.3579 | -1.546  | 0.0008  | -0.8623 | -0.0817 | -0.0684 | 0.3762  | 0.6347  | 0.3543  | 0.3119  | -0.1207 |
| PY03723 | -0.1554 | -0.3881 | 0.124   | -0.3326 | -0.5554 | -0.1791 | -0.0634 | -0.095  | -0.0674 | 0.161   | 0.0579  | -0.0154 |
| PY01242 | 0.3389  | 0.1928  | 0.2713  | -0.0759 | -0.2968 | -0.0743 | 0.127   | -0.0916 | -0.0168 | -0.2237 | -0.4567 | 0.2894  |
| PY05717 | -0.0111 | 0.0654  | -0.414  | -0.056  | -0.2157 | -0.2133 | 0.0891  | 0.1032  | 0.569   | 0.1363  | 0.0139  | 0.3102  |
| PY00409 | -2.0458 | -0.2174 | -0.0756 | -0.9677 | -0.9706 | -0.3935 | 0.0438  | 0.3987  | 0.3953  | 0.1437  | 0.9818  | -0.2005 |
| PY07291 | 0.1206  | -0.0492 | 0.0093  | 0.421   | 0.5467  | 0.0284  | -0.0595 | 0.1119  | -0.0249 | 0.6533  | 0.4249  | -0.0114 |
| PY02440 | 0.2731  | -0.0303 | 0.0525  | -0.1725 | -0.0767 | -0.0238 | -0.2822 | -0.3002 | -0.1128 | -0.0576 | -0.497  | 0.0366  |
| PY00624 | 0.866   | 0.5337  | 0.2263  | 1.2167  | 0.3523  | 0.1997  | 0.1081  | 0.0957  | -0.0849 | 0.1273  | -0.2059 | 0.1006  |
| PY00116 | 0.0001  | 0.1116  | -0.2206 | 0.067   | 0.1101  | -0.0515 | 0.058   | 0.1967  | 0.2751  | 0.1546  | -0.3415 | -0.0205 |
| PY02921 | 0.1978  | 0.1024  | -0.0523 | 0.3604  | 0.8814  | 0.2038  | 0.2512  | 0.6448  | -0.0091 | 0.2489  | 0.8847  | 0.1361  |
| PY00541 | -0.8714 | -0.0567 | 0.0489  | -0.4418 | -0.0419 | -0.0715 | 0.0724  | 0.085   | 0.1694  | -0.0572 | 0.4034  | -0.3516 |
| PY06591 | 0.3806  | 0.1307  | 0.0302  | -0.0195 | -0.4066 | -0.2378 | 0.0134  | 0.0025  | 0.2753  | 0.5439  | -0.507  | 0.2141  |
| PY04018 | -1.0911 | -0.8402 | -0.3972 | -1.0953 | -0.217  | -0.1905 | -0.1718 | -0.1992 | 0.2672  | -0.5447 | -0.2544 | -0.8515 |
| PY00917 | -0.5396 | 0.1413  | 0.039   | -0.2533 | -0.2567 | 0.222   | -0.0758 | 0.138   | 0.0879  | 0.155   | -0.104  | -0.1753 |
| PY05807 | -0.2591 | -0.2117 | -0.2407 | -0.2177 | 0.0999  | -0.1352 | -0.1744 | -0.1334 | -0.3171 | -0.2747 | 0.1745  | 0.504   |

|         |         |         |         |         |         |         |         |         |         |         |         |         |
|---------|---------|---------|---------|---------|---------|---------|---------|---------|---------|---------|---------|---------|
| PY04752 | 0.2909  | -0.1593 | -0.2326 | -0.0779 | 0.5156  | 0.3902  | -0.1662 | -0.0925 | -0.0542 | 0.2795  | 0.0768  | 0.0414  |
| PY04487 | -0.7697 | 0.0828  | 0.112   | 0.2251  | 0.2075  | -0.2416 | 0.1096  | 0.1344  | 0.2113  | 0.3511  | 1.0574  | 0.1336  |
| PY06572 | -0.2831 | -0.1751 | -0.3537 | 0.3926  | 0.3707  | 0.3279  | 0.2676  | 0.3785  | 0.2801  | 0.383   | 0.3038  | 0.3232  |
| PY06087 | 0.0979  | 0.05    | 0.1725  | -0.2375 | -0.077  | -0.1992 | -0.0389 | -0.0094 | -0.0458 | 0.4136  | 0.2033  | -0.1066 |
| PY04867 | -0.0185 | 0.0622  | -0.1859 | -0.4521 | -0.437  | -0.0766 | -0.0474 | 0.0194  | 0.3992  | -0.0752 | -0.3478 | -0.1273 |
| PY04731 | 0.5921  | 0.0081  | -0.081  | 0.3818  | 0.2011  | -0.034  | -0.1943 | -0.1483 | -0.1932 | -0.2771 | -0.4136 | -0.1736 |
| PY04985 | 0.2514  | 0.5176  | 0.2952  | 0.7425  | 0.1365  | 0.2143  | -0.0788 | -0.0685 | 0.1133  | 0.2835  | 0.003   | -0.1192 |
| PY06556 | -0.5534 | -0.5288 | -0.2587 | 0.1706  | 0.8479  | 0.1273  | -0.2257 | 0.2436  | -0.0223 | 0.4593  | 1.2027  | 0.3248  |
| PY06983 | 0.2105  | -0.2294 | -0.6131 | -1.6191 | -1.1317 | 0.1996  | 0.0706  | -1.5027 | -0.1519 | -0.9945 | -1.7291 | 0.4367  |
| PY03035 | -1.1349 | -0.1901 | -0.1447 | -0.5488 | -0.2163 | -0.0895 | -0.0635 | 0.4695  | 0.2142  | 0.2203  | 0.3566  | -0.3668 |
| PY03622 | -0.8295 | -0.1852 | -0.4163 | -0.3625 | -0.655  | -0.1663 | -0.0291 | 0.0937  | 0.1983  | 0.2421  | 0.0983  | -0.0928 |
| PY06859 | 0.7961  | 0.1953  | -0.3437 | 0.0927  | -0.1282 | -0.0323 | 0.0618  | -0.3359 | -0.0769 | -0.47   | -0.6789 | 0.2348  |
| PY04762 | 0.7461  | 0.4038  | 0.3497  | 0.6117  | -0.0626 | 0.0208  | 0.0395  | -0.4872 | -0.3584 | -1.338  | -1.1177 | -0.2802 |
| PY02806 | -0.2906 | -0.1311 | 0.1458  | 0.2165  | -0.2184 | -0.3505 | -0.1823 | 0.0985  | -0.1452 | 0.3405  | 0.2727  | -0.1235 |
| PY02462 | -0.2925 | 0.0719  | 0.1501  | -0.1135 | -0.1237 | -0.3845 | -0.2871 | -0.119  | -0.121  | -0.0623 | 0.2967  | -0.2443 |
| PY07606 | -0.2435 | -0.0107 | -0.3856 | -0.0485 | 0.1225  | -0.238  | -0.5144 | -0.1633 | -0.2159 | -0.0351 | -0.0649 | -0.2709 |
| PY06713 | -0.1898 | 0.1511  | 0.1925  | -0.1788 | -0.0783 | 0.0888  | 0.0495  | -0.0041 | 0.0355  | -0.3181 | -0.1695 | -0.2782 |
| PY05706 | -0.1761 | -0.1816 | -0.041  | -0.1553 | 0.3245  | -0.2515 | -0.2007 | -0.1755 | -0.2058 | -0.1261 | -0.1695 | 0.1055  |
| PY04922 | -0.2204 | -0.0334 | -0.31   | -1.9802 | -0.7164 | -0.3019 | 0.1409  | -0.547  | -0.2795 | -0.8444 | -0.8855 | 0.0256  |
| PY04576 | -0.3536 | -0.0204 | 0.2806  | -0.2857 | 0.1755  | -0.2265 | -0.1284 | -0.1551 | 0.1225  | 0.2084  | 0.3976  | -0.3148 |
| PY00786 | 0.1462  | 0.4765  | 0.2783  | -2.0059 | -1.1924 | 0.1707  | 0.1658  | -0.7904 | 0.0531  | -1.3819 | -1.0751 | 0.2656  |
| PY00746 | 0.395   | 0.0095  | 0.4562  | 0.018   | 0.1882  | 0.0818  | -0.0759 | -0.3263 | -0.1409 | 1.518   | -0.1375 | -0.0823 |
| PY05795 | -0.0313 | -0.1227 | 0.0296  | -0.5194 | 0.041   | 0.2292  | -0.0639 | -0.2409 | -0.1032 | -0.1729 | -0.1783 | -0.004  |
| PY00672 | 0.4376  | 0.2868  | 0.0944  | 0.024   | -0.4239 | 0.0201  | 0.0979  | 0.0269  | 0.1599  | 0.3021  | -0.193  | -0.0297 |
| PY04769 | -0.6578 | -0.2959 | -0.3572 | 0.4436  | 0.4095  | 0.3721  | 0.1558  | 0.789   | 0.279   | 0.3532  | 0.909   | -0.2674 |
| PY00442 | 0.5393  | 0.2166  | -0.0007 | 1.9806  | 1.0896  | 0.8257  | -0.0787 | 0.6388  | 0.0998  | 1.3911  | 0.9755  | -0.0399 |
| PY03615 | 0.1005  | 0.1364  | 0.0141  | 0.1226  | -0.3257 | 0.2364  | 0.2795  | 0.2049  | 0.3786  | 0.0462  | -0.3354 | 0.2104  |
| PY02144 | -0.0826 | -0.1602 | 0.0795  | 0.0256  | -0.5099 | -0.2773 | 0.0148  | -0.307  | -0.3446 | -0.3167 | -0.5446 | -0.1305 |
| PY07120 | 0.0695  | -0.1338 | 0.6349  | 0.3986  | 0.36    | 0.2083  | 0.2363  | -0.1336 | -0.5846 | -0.1588 | -0.3571 | 0.1568  |
| PY05478 | 0.5934  | 0.2494  | 0.4906  | 0.2601  | 0.0569  | 0.0559  | 0.0814  | -0.282  | 0.1115  | 0.1051  | -0.5826 | 0.2573  |
| PY02197 | 0.0467  | 0.117   | -0.1322 | 0.3237  | -0.0325 | 0.0471  | -0.0168 | -0.051  | -0.1072 | -0.8058 | 0.1978  | -0.3496 |
| PY03933 | 0.3569  | 0.3161  | 0.4895  | -0.1551 | -0.1906 | -0.0562 | -0.0221 | -0.1947 | -0.1313 | -0.0586 | -0.4301 | -0.1078 |
| PY04318 | 0.7646  | 0.4718  | 0.6295  | -0.268  | 0.0191  | -0.3414 | 0.5738  | -0.4042 | 0.559   | -0.1011 | -0.0791 | 0.6408  |
| PY03433 | -0.3694 | -0.2646 | 0.0573  | 0.0094  | -0.0749 | -0.2361 | 0.0431  | 0.083   | 0.1488  | 0.0379  | 0.3012  | 0.1023  |
| PY07531 | -1.8044 | -0.6916 | -0.2754 | -0.8481 | -0.1342 | -0.2083 | -0.2259 | 0.028   | -0.044  | 0.165   | 0.5903  | -0.2324 |
| PY05842 | -0.3513 | -0.1355 | -0.1897 | 0.2691  | -0.4005 | -0.2452 | -0.0067 | 0.1995  | 0.0628  | -0.6163 | -0.2019 | 0.235   |
| PY06842 | 0.4435  | 0.0104  | -0.008  | -0.2056 | -0.6632 | -0.1798 | 0.2653  | 0.0654  | 0.1779  | 0.5144  | -0.5657 | 1.0109  |
| PY01347 | -0.3127 | 0.0026  | 0.0316  | -0.6757 | -0.0793 | 0.1208  | 0.186   | 0.352   | 0.2845  | -0.5904 | -0.0895 | -0.2092 |
| PY01375 | 0.7975  | 0.5951  | -0.0736 | 0.2247  | -0.7333 | -0.2411 | 0.1502  | 0.2652  | 0.2833  | -0.2414 | -0.3902 | -0.1291 |
| PY02958 | 0.5574  | 0.0601  | 0.08    | 0.047   | -0.1863 | 0.1409  | 0.3927  | -0.4802 | 0.1053  | 0.0445  | -0.3512 | 0.3608  |
| PY05329 | 1.0824  | 0.9476  | -0.0784 | -0.6857 | -0.0807 | -0.8018 | -0.7851 | -0.8621 | -1.0044 | -0.4043 | -0.4094 | -1.09   |
| PY06312 | -0.1415 | 0.1373  | 0.0817  | -0.261  | -0.1477 | -0.1151 | 0.0998  | -0.0116 | -0.1795 | -0.349  | -0.097  | 0.026   |
| PY03862 | -0.6701 | -0.1044 | -0.1146 | -0.4264 | 0.53    | 0.1899  | -0.1019 | -0.0451 | -0.1982 | -0.148  | 0.0643  | -0.2979 |
| PY04214 | 0.2275  | -0.1781 | 0.5214  | 0.3339  | -0.3031 | -0.1567 | 0.0216  | 0.0819  | 0.327   | -0.0812 | -0.0407 | 0.1639  |
| PY01216 | -0.0364 | -0.2022 | -0.1423 | 0.8529  | 0.5162  | -0.1629 | -0.1078 | 0.128   | -0.7935 | 0.519   | -0.1344 | -0.3816 |
| PY06273 | 0.3169  | 0.2935  | -0.5798 | 0.0238  | 0.1716  | 0.4126  | -0.1204 | -0.2438 | -0.485  | -0.2394 | -0.1513 | -0.3768 |
| PY03846 | 0.0118  | -0.0601 | -0.0101 | 0.023   | 0.5262  | 0.122   | -0.1234 | 0.1352  | 0.0201  | 0.2327  | 0.3655  | 0.0182  |
| PY01511 | 0.2312  | 0.0086  | -0.2472 | 0.1536  | -0.1604 | -0.0346 | -0.353  | -0.3636 | -0.4725 | -0.6692 | -0.4917 | -0.1302 |
| PY03200 | -0.3537 | -0.1553 | -0.1217 | -0.5101 | -0.4145 | -0.1571 | -0.0711 | 0.2469  | 0.0399  | -0.0456 | 0.2644  | -0.1101 |
| PY05661 | 0.2169  | 0.1181  | 0.2447  | -0.0474 | 0.106   | 0.2379  | 0.2712  | 0.0269  | 0.1896  | -0.0112 | 0.0411  | 0.3488  |
| PY02530 | -0.0291 | -0.0396 | -0.3838 | -0.1732 | -0.2787 | 0.0315  | -0.1138 | 0.1502  | -0.008  | 0.146   | 0.1759  | 0.1144  |
| PY00141 | 0.3099  | 0.2627  | 0.0475  | 0.2447  | -0.2518 | -0.2123 | -0.0114 | -0.2927 | -0.0918 | -0.4899 | -0.4491 | -0.0427 |
| PY07395 | -0.0192 | -0.2068 | -0.4711 | -0.2301 | 0.2271  | -0.2368 | -0.3243 | 0.0181  | -0.1486 | -0.1539 | -0.1102 | 0.0896  |
| PY02068 | -0.4102 | -0.4354 | -0.4597 | 1.7545  | 0.4167  | -0.0554 | -0.2965 | 0.6267  | -0.0884 | 1.4227  | 0.9332  | 0.101   |
| PY02889 | -0.2007 | -0.0095 | -0.5743 | -0.0652 | -0.3208 | -0.2074 | -0.1735 | 0.0254  | 0.0137  | 0.123   | 0.026   | 0.0472  |
| PY01734 | -0.8942 | -0.2559 | -0.0829 | 0.0003  | -0.3027 | -0.0513 | 0.0709  | 0.3299  | 0.3658  | 0.1405  | 0.1217  | 0.2094  |
| PY01359 | 0.4231  | 0.1666  | 0.0485  | -0.4687 | -0.2296 | -0.3862 | -0.1978 | 0.2317  | -0.088  | -0.0712 | 0.1198  | 0.0278  |
| PY06743 | -0.1869 | -0.014  | 0.0792  | -0.0273 | -0.3899 | -0.0287 | -0.0508 | 0.1547  | 0.2273  | -0.5558 | -0.2764 | -0.0582 |
| PY02737 | -0.8753 | 0.0572  | -0.1546 | 0.1108  | -0.4193 | -0.4887 | -0.377  | 0.1408  | 0.0048  | -0.3525 | 0.4258  | -0.2731 |
| PY03153 | -0.2402 | -0.2856 | 0.2007  | -0.1055 | 0.2784  | -0.3401 | -0.2545 | -0.025  | -0.1013 | -0.0451 | 0.2203  | -0.3521 |
| PY02907 | 0.4345  | -0.144  | -0.2075 | -0.095  | -0.0222 | -0.2331 | -0.1597 | 0.015   | 0.2487  | -0.2739 | 0.1586  | 0.2139  |
| PY04169 | 0.4708  | -0.1184 | -1.001  | -0.0338 | 0.2745  | -0.0227 | -0.0808 | 0.4589  | 0.1705  | 0.5425  | -0.0384 | 0.2357  |
| PY01306 | -0.5198 | -0.5633 | -0.5296 | 0.0043  | 0.3048  | 0.1167  | 0.0622  | -0.2731 | -0.1573 | -0.0413 | 0.2029  | 0.1423  |



|         |         |         |         |         |         |         |         |         |         |         |         |         |
|---------|---------|---------|---------|---------|---------|---------|---------|---------|---------|---------|---------|---------|
| PY03115 | -0.4576 | -0.16   | 0.142   | 0.2075  | 0.5849  | 0.3802  | 0.0495  | -0.2392 | -0.1974 | -0.1527 | -0.1339 | -0.1953 |
| PY01234 | 0.3511  | 0.0904  | -0.1359 | -0.369  | -0.0446 | -0.119  | 0.0491  | -0.2036 | 0.0033  | -0.2175 | 0.08    | 0.3437  |
| PY00335 | -0.613  | 0.01    | -0.2445 | -0.6902 | -0.6827 | 0.071   | 0.1474  | 0.1996  | 0.1222  | -0.0908 | -0.1191 | -0.1976 |
| PY03201 | -0.071  | 0.189   | -0.1454 | 0.0448  | -0.7792 | -0.2375 | -0.1124 | -0.2484 | 0.2166  | 0.3515  | 0.0081  | -0.0836 |
| PY06041 | 0.6912  | 0.4275  | 0.1522  | 0.7771  | -0.0583 | 0.2638  | 0.135   | -0.2012 | -0.4241 | 0.0868  | -0.6184 | 0.087   |
| PY04806 | -0.5562 | -0.1972 | 0.0561  | -0.1843 | 0.16    | -0.0915 | -0.0768 | -0.0295 | -0.3058 | 0.0613  | -0.1697 | 0.1879  |
| PY01878 | -0.7401 | -0.0888 | -0.1658 | 0.2754  | 0.2749  | 0.5051  | 0.0531  | 0.402   | 0.2512  | 0.0946  | 0.3646  | -0.3062 |
| PY05860 | -0.3143 | -0.3877 | -0.4405 | 0.1348  | 0.4219  | -0.135  | -0.0773 | -0.0259 | 0.1969  | 0.5828  | 0.1124  | 0.1508  |
| PY04483 | 0.7539  | 0.3284  | 0.6377  | 0.1638  | -0.2827 | -0.0022 | 0.3517  | -0.1142 | 0.1809  | -0.1229 | -0.238  | 0.4001  |
| PY04621 | -0.1418 | 0.0259  | 0.2434  | 0.1249  | -0.2607 | -0.554  | -0.4645 | -0.0512 | 0.0367  | -0.0652 | 0.3628  | -0.2846 |
| PY01446 | -0.794  | -0.3327 | 0.0394  | 0.0335  | 0.3196  | 0.1833  | -0.2243 | -0.1287 | -0.1413 | 0.0889  | 0.1436  | -0.0522 |
| PY05106 | -0.5516 | 0.1196  | 0.7795  | 0.1624  | -0.3231 | 0.1038  | 0.3004  | 0.1887  | 0.44    | 0.19    | -0.4151 | 0.1421  |
| PY04620 | -0.0172 | -0.1199 | -0.2123 | -0.1211 | -0.0226 | -0.0502 | -0.223  | -0.0699 | -0.0704 | 0.0616  | -0.1428 | -0.1214 |
| PY07597 | 0.0552  | -0.1909 | -0.2767 | 1.3939  | 1.0245  | 0.6477  | 0.027   | 0.7072  | 0.0867  | 1.3179  | 0.8975  | 0.2056  |
| PY01186 | -1.5008 | -0.5313 | -0.1392 | -0.4524 | -0.4709 | -0.2725 | -0.2667 | 0.0611  | 0.4275  | 0.1017  | 0.5836  | -0.1529 |
| PY05178 | 0.5688  | 0.207   | -0.1181 | 0.1343  | 0.2441  | 0.1473  | -0.2324 | -0.1506 | -0.2939 | -0.3999 | -0.4248 | -0.222  |
| PY02447 | 0.6551  | 0.3534  | 0.4956  | -0.3223 | -0.0591 | 0.0435  | -0.0792 | -0.3315 | 0.0111  | -0.4304 | -0.5227 | 0.0146  |
| PY00738 | -0.0849 | 0.0638  | -0.1235 | -0.104  | 0.1222  | 0.3008  | 0.0805  | -0.214  | 0.0662  | -0.1088 | 0.1986  | 0.0933  |
| PY05025 | 0.2669  | -0.0763 | 0.1176  | 0.047   | 0.0162  | 0.1237  | -0.0004 | 0.1328  | -0.5386 | 0.0941  | -0.3608 | 0.1727  |
| PY04295 | -0.4227 | -0.3036 | 0.0365  | -0.3812 | 0.3445  | 0.2941  | -0.0709 | 0.0325  | 0.0448  | -0.0221 | 0.314   | -0.0383 |
| PY07416 | 0.392   | 0.1502  | 0.0396  | 0.5594  | 0.0205  | 0.2646  | 0.2909  | 0.2168  | -0.0283 | -0.0724 | -0.3112 | 0.0727  |
| PY03716 | 0.502   | -0.1512 | -0.5034 | 0.4769  | 0.6562  | 0.1254  | -0.3956 | -0.2038 | -0.5263 | -0.0346 | -0.3405 | -0.4488 |
| PY06648 | -0.5249 | -0.0244 | -0.0588 | -0.1557 | 0.506   | 0.577   | 0.469   | 0.5571  | 0.2717  | 0.2702  | 0.731   | 0.1346  |
| PY03501 | 0.0972  | 0.2856  | 0.1594  | 0.39    | -0.2519 | -0.0278 | 0.1986  | -0.0017 | 0.1536  | 0.5166  | -0.1824 | 0.3289  |
| PY01494 | -0.5668 | -0.281  | -0.337  | -0.1972 | -0.2178 | 0.0018  | 0.0042  | 0.3465  | 0.1354  | -0.2559 | 0.7398  | -0.0999 |
| PY01633 | 0.0795  | 0.1619  | -0.104  | -0.4472 | 0.232   | -0.0693 | -0.2231 | -0.417  | 0.0654  | -0.2119 | -0.222  | 0.1129  |
| PY07003 | 1.4052  | 0.1308  | 0.0171  | 0.5526  | -0.3417 | -0.3609 | 0.1016  | 0.393   | 0.2956  | 0.8967  | -0.1626 | 0.6148  |
| PY07039 | 0.4177  | 0.1236  | -0.1221 | 0.956   | 0.7181  | 0.2003  | 0.1302  | 0.0168  | 0.164   | 0.2884  | 0.1561  | 0.3641  |
| PY02258 | 0.1458  | 0.1981  | 0.8024  | 0.391   | -0.2432 | -0.0503 | 0.125   | -0.1205 | 0.2132  | 0.2476  | -0.4081 | 0.2255  |
| PY03656 | -0.3765 | -0.0644 | 0.2221  | 0.037   | -0.017  | -0.3933 | 0.2133  | 0.3556  | 0.4438  | 0.2823  | 0.2016  | 0.0427  |
| PY03787 | -1.0165 | -0.5177 | -0.4367 | -0.0452 | -0.144  | -0.374  | -0.3038 | 0.0612  | -0.0264 | 0.1464  | 0.2156  | 0.0588  |
| PY00666 | -0.1791 | -0.0904 | -0.1803 | -0.5003 | 0.1194  | 0.1502  | -0.1324 | -0.1355 | -0.1902 | -0.3326 | 0.1305  | 0.1372  |
| PY07403 | 0.3139  | 0.0255  | -0.0043 | 0.6078  | 0.4196  | 0.048   | -0.0968 | -0.1239 | 0.0605  | 0.0303  | 0.1422  | -0.0044 |
| PY03944 | 0.4425  | 0.1085  | 0.1349  | 0.1967  | 0.1663  | 0.1647  | 0.2185  | -0.1182 | 0.0971  | -0.028  | 0.0418  | -0.3961 |
| PY05413 | -0.035  | -0.1524 | -0.0748 | -0.8748 | -0.3528 | -0.1643 | 0.142   | -0.1131 | 0.2177  | -0.6277 | 0       | 0.1991  |
| PY06159 | -0.3279 | -0.0618 | -0.4497 | -0.6024 | 0.0579  | -0.3112 | -0.1548 | 0.1938  | 0.2082  | -0.3225 | 0.0321  | -0.1625 |
| PY01192 | -0.0171 | -0.3368 | -0.5523 | 0.5431  | 0.1581  | 0.1994  | -0.0167 | 0.3305  | -0.2648 | 0.093   | -0.1804 | -0.0625 |
| PY02319 | -0.1122 | -0.0843 | 0.0714  | -0.1159 | 0.1727  | 0.0082  | -0.1376 | -0.0175 | -0.0154 | -0.1913 | -0.3136 | -0.3508 |
| PY03158 | -1.1259 | -0.0656 | 0.1069  | -0.3469 | -0.4548 | -0.2794 | -0.1423 | 0.1124  | 0.0733  | -0.0489 | 0.0282  | -0.2672 |
| PY02851 | 0.5403  | 0.3052  | 0.3382  | -0.1057 | 0.1888  | 0.3071  | 0.6271  | 0.0232  | 0.4214  | -0.0724 | 0.0114  | 0.2869  |
| PY05143 | -0.3519 | -0.1108 | 0.1411  | 1.4679  | -0.1887 | -0.1413 | -0.2147 | 0.0294  | 0.1073  | -0.0403 | 0.1718  | -0.0612 |
| PY06080 | -0.4039 | -0.1536 | -0.0959 | -0.631  | -0.1478 | 0.2928  | 0.0529  | 0.283   | 0.1667  | 0.2047  | 0.7579  | 0.0405  |
| PY03956 | 0.2814  | 0.105   | 0.377   | 0.0999  | -0.1578 | 0.3692  | 0.6304  | 0.4134  | 0.6592  | -0.224  | -0.5668 | 0.1514  |
| PY00451 | -0.5653 | -0.3368 | 0.2078  | -0.1634 | -0.3035 | -0.35   | 0.1059  | -0.3894 | -0.1927 | -0.0449 | 1.3491  | -0.1434 |
| PY07650 | 0.2995  | 0.1279  | 0.2021  | 0.4081  | 0.4699  | 0.1741  | 0.1534  | -0.0308 | 0.3509  | 0.167   | 0.3127  | 0.1602  |
| PY00439 | 0.5721  | 0.1577  | -0.0538 | 0.3356  | -0.2477 | -0.462  | -0.5032 | -0.4488 | -0.2994 | -0.2018 | -0.6577 | -0.1514 |
| PY07019 | -0.5859 | -0.1933 | 0.0107  | 0.0599  | -0.4655 | -0.3671 | 0.0292  | 0.5644  | 0.3175  | 0.4282  | -0.0173 | -0.3922 |
| PY03055 | 0.274   | 0.0647  | 0.0197  | -0.7765 | -0.3421 | -0.1617 | -0.1073 | -0.3695 | -0.1175 | -0.1432 | -0.3492 | 0.0447  |
| PY02683 | 0.1134  | 0.1688  | 0.3923  | -0.3695 | -0.2004 | -0.0218 | 0.3626  | -0.2145 | 0.2189  | -0.2801 | -0.413  | 0.3301  |
| PY03170 | 0.4433  | 0.2654  | -0.1462 | 0.4336  | 0.2053  | -0.3349 | -0.2972 | -0.3288 | -0.3526 | -0.2991 | -0.5572 | -0.2937 |
| PY02770 | -0.9357 | -0.7309 | -0.938  | -0.314  | 0.0279  | 0.0641  | 0.0806  | 0.5757  | 0.164   | -0.2786 | 0.5019  | -0.1335 |
| PY07107 | -0.3797 | -0.0569 | -0.4228 | -0.4592 | -0.1923 | 0.1844  | -0.1676 | -0.1581 | -1.1549 | -0.1112 | -0.2011 | -0.3121 |
| PY01231 | 0.1279  | 0.0783  | 0.1909  | 0.5951  | 0.7223  | 0.2432  | 0.2842  | -0.0972 | 0.1172  | 0.1819  | 0.3816  | 0.3715  |
| PY00837 | 0.1642  | -0.5179 | -0.5935 | 0.1634  | 0.0455  | -0.1656 | -0.5313 | 0.05    | -0.1694 | 0.323   | 0.297   | -0.2173 |
| PY02608 | 0.0334  | 0.398   | -0.5331 | -0.3791 | -0.0808 | -0.1248 | 0.0328  | 0.2878  | 0.0426  | -0.074  | 0.1805  | -0.6203 |
| PY03470 | 0.4461  | -0.0356 | -0.1839 | -0.1887 | 0.0143  | 0.2326  | -0.2164 | -0.2339 | -0.6967 | -0.8977 | -1.2089 | -0.2178 |
| PY00621 | -0.3544 | -0.1572 | 0.0035  | -0.4113 | 0.0147  | -0.1192 | -0.196  | -0.1866 | 0.0637  | -0.2148 | -0.0193 | 0.1982  |
| PY00607 | -0.403  | -0.2456 | -0.2495 | -0.0579 | 0.3822  | -0.1568 | -0.0625 | 0.1623  | -0.0637 | 0.036   | 0.1296  | 0.2693  |
| PY04011 | 0.6357  | -0.0573 | -0.2288 | -0.4582 | -0.3679 | -0.6632 | -0.285  | -0.6116 | -0.169  | -0.0967 | -0.4782 | 0.0867  |
| PY02232 | -0.6998 | -0.4547 | 0.2399  | 0.0931  | 0.2038  | -0.048  | -0.1202 | 0.0916  | 0.0245  | -0.0761 | 0.2985  | 0.0322  |
| PY03614 | -0.4667 | -0.0708 | 0.1653  | 0.0356  | 0.3252  | -0.0703 | -0.1906 | -0.0544 | -0.0844 | 0.0742  | 0.7693  | -0.0926 |
| PY03719 | -0.148  | -0.1183 | -0.0508 | 0.1438  | -0.1597 | 0.0482  | 0.039   | 0.1902  | -0.0773 | -0.0883 | -0.3653 | -0.1743 |
| PY06542 | -0.2221 | -0.1112 | -0.0668 | 0.151   | 0.0193  | -0.1521 | -0.1346 | 0.1198  | 0.1542  | 0.3582  | 0.8242  | 0.1666  |

|         |         |         |         |         |         |         |         |         |         |         |         |         |
|---------|---------|---------|---------|---------|---------|---------|---------|---------|---------|---------|---------|---------|
| PY00735 | 0.7857  | 0.3379  | -0.557  | 0.1037  | 0.0356  | 0.0981  | -0.234  | 0.1234  | -0.9225 | 0.1987  | -0.2226 | -0.5066 |
| PY06365 | 2.1193  | -0.2271 | -0.3835 | 1.6712  | 1.8037  | 1.0418  | -0.0844 | 0.7219  | -0.2646 | 1.289   | 0.0925  | -0.1911 |
| PY01779 | 0.0363  | 0.105   | 0.1289  | 0.1573  | 0.1062  | -0.0322 | -0.0072 | -0.236  | -0.2857 | -0.0571 | -0.3517 | 0.0778  |
| PY05215 | 0.0539  | 0.0181  | 0.3893  | -0.081  | 0.1254  | 0.1276  | 0.2704  | -0.0418 | 0.244   | 0.1875  | -0.0906 | 0.3883  |
| PY05574 | -0.0982 | 0.0975  | 0.0532  | -0.499  | -0.4398 | 0.0261  | 0.0886  | -0.1035 | 0.032   | -0.0527 | 0.1048  | 0.1077  |
| PY00389 | -1.225  | -0.8203 | -0.7086 | -0.9861 | -0.4164 | -0.2277 | -0.0198 | 0.2155  | 0.247   | -0.1662 | 0.6196  | -0.2179 |
| PY06003 | -0.3883 | -0.1027 | -0.3843 | -0.5713 | -0.0199 | -0.0674 | -0.0467 | -0.1299 | -0.1445 | -0.158  | -0.1845 | -0.0158 |
| PY04520 | -1.0475 | -0.9005 | -0.7768 | -1.1664 | -0.7044 | 0.1238  | 0.0229  | 0.332   | 0.1432  | 0.0966  | 0.7016  | 0.0898  |
| PY04860 | -1.0439 | -0.4645 | -0.2326 | -0.1113 | 0.2171  | -0.0213 | 0.0112  | 0.2238  | 0.0484  | 0.467   | 0.6317  | 0.3309  |
| PY02829 | 0.1412  | 0.1034  | 0.6722  | 0.7236  | 0.243   | 0.4335  | 0.3517  | 0.0495  | 0.5237  | 0.2174  | -0.0642 | 0.4938  |
| PY00857 | -0.7468 | -0.3142 | -0.1415 | -0.0727 | 0.1125  | -0.4308 | -0.4005 | -0.1786 | -0.272  | -0.2244 | 0.0763  | -0.119  |
| PY03557 | -0.3176 | -0.0288 | 0.0347  | -0.0313 | 0.0475  | 0.082   | -0.0385 | -0.1166 | 0.0772  | 0.1422  | 0.2996  | -0.0342 |
| PY06665 | -0.3741 | -0.0035 | -0.0749 | -0.0837 | 0.1961  | 0.0158  | -0.162  | 0.2484  | -0.1245 | 0.1481  | 0.7728  | -0.2087 |
| PY02421 | 0.0174  | -0.2474 | -0.0258 | 0.2085  | 1.1921  | 0.4758  | 0.0545  | 0.1332  | -0.3179 | 0.1368  | -0.1211 | 0.0633  |
| PY03045 | 1.4106  | 0.9842  | 0.5285  | 0.4588  | -0.9396 | 0.3494  | 0.6824  | -0.2717 | 0.3274  | 0.05    | -1.3266 | 0.5624  |
| PY02636 | 0.1475  | -0.048  | 0.1558  | -0.0281 | -0.1264 | -0.2653 | 0.2375  | 0.0975  | 0.0086  | -0.8292 | -0.1523 | -0.1931 |
| PY04551 | 0.7738  | 0.3412  | 0.1198  | -0.059  | -0.3035 | -0.0646 | 0.0635  | -0.0806 | 0.0043  | -0.1518 | 0.1522  | 0.2309  |
| PY05892 | -0.0764 | -0.3129 | -0.569  | 0.0479  | 0.1016  | -0.0795 | -0.2515 | -0.0982 | 0.0289  | 0.1381  | -0.0771 | -0.1826 |
| PY00334 | -0.805  | -0.4744 | -0.2341 | -0.0529 | -0.0415 | -0.1313 | -0.3154 | 0.0792  | -0.6764 | -0.4168 | 0.6718  | -0.6075 |
| PY06181 | -0.3043 | -0.1198 | 0.2313  | -0.034  | -0.1188 | -0.8301 | 0.3742  | 0.2399  | 0.3084  | 0.3365  | 0.1186  | 0.1111  |
| PY06277 | 0.3893  | -0.065  | 0.2158  | 0.1644  | 0.2968  | 0.5663  | 0.1525  | -0.299  | -0.2676 | -0.4265 | -0.1232 | -0.039  |
| PY05187 | 0.8147  | 0.3884  | 0.5659  | 0.5861  | -0.1243 | 0.0523  | 0.4426  | 0.0692  | 0.2731  | 0.2654  | -0.5759 | 0.7005  |
| PY06260 | 0.1964  | 0.1343  | 0.054   | -0.41   | -0.4677 | -0.2152 | 0.0048  | -0.2805 | 0.0773  | -0.6077 | -0.5174 | 0.1227  |
| PY02385 | -0.8542 | -0.1911 | 0.2628  | -0.1259 | 0.3934  | -0.1777 | -0.1919 | 0.2168  | 0.2625  | 0.1278  | 0.2667  | -0.2056 |
| PY03576 | -1.0655 | -0.5711 | -0.1291 | -0.6917 | 0.0338  | -0.1443 | -0.0563 | -0.0678 | -0.0065 | -0.0785 | 0.7143  | -0.2163 |
| PY04569 | -1.4661 | -0.7214 | -0.4978 | -0.6846 | -0.86   | -0.3644 | 0.0759  | 0.6091  | 0.4348  | 0.1898  | 0.7573  | -0.1801 |
| PY01207 | 0.0495  | 0.1232  | -0.0375 | -0.3916 | -0.3879 | -0.1944 | 0.0328  | 0.0891  | 0.131   | -0.4787 | -0.5154 | -0.5426 |
| PY07250 | -0.4214 | 0.0362  | 0.3955  | -0.2175 | -0.1099 | -0.2004 | -0.2721 | -0.1107 | -0.2675 | -0.1269 | -0.108  | -0.3393 |
| PY05431 | -0.6382 | -0.4766 | 0.1417  | -0.0971 | 0.0238  | -0.5294 | -0.4959 | 0.0802  | -0.2064 | 0.4057  | 0.2187  | -0.0105 |
| PY05535 | 0.7482  | 0.3994  | 0.4958  | 0.415   | -0.3584 | 0.0186  | 0.329   | -0.5114 | 0.4249  | -0.1436 | -0.8615 | 0.1928  |
| PY01554 | 0.2411  | 0.2005  | 0.4316  | 0.6956  | 0.2531  | 0.3319  | 0.1925  | 0.2484  | 0.1305  | 0.8491  | 0.5535  | 0.2255  |
| PY02718 | -0.0802 | 0.1506  | -0.3076 | 0.6879  | 0.4325  | -0.1875 | -0.0208 | 0.0732  | -0.1702 | 0.4934  | 0.4652  | 0.0569  |
| PY00427 | -0.2416 | 0.0963  | -0.1398 | 0.0169  | 0.1929  | -0.0951 | -0.0661 | -0.207  | -0.0681 | 0.3285  | -0.0671 | 0.0209  |
| PY03318 | 0.2742  | 0.1042  | 0.141   | -0.2084 | 0.3101  | -0.2947 | 0.159   | -0.1816 | -0.1411 | -0.49   | -0.1971 | -0.0315 |
| PY07443 | -0.1803 | -0.2311 | 0.0617  | 0.2699  | -0.1253 | -0.3282 | -0.0663 | 0.0958  | 0.1812  | -0.209  | 0.3869  | 0.0569  |
| PY06707 | -0.11   | -0.2055 | 0.1074  | 0.5387  | 0.4903  | -0.4833 | 0.0529  | -0.1601 | -0.1094 | -0.2063 | 0.4944  | -0.0157 |
| PY01586 | -0.8214 | -0.5395 | -0.624  | -0.011  | -0.525  | -0.1716 | 0.1884  | 0.6413  | 0.5291  | 0.5768  | 1.0349  | 0.383   |
| PY04613 | -0.0603 | 0.1701  | -0.1353 | -0.4505 | -0.0243 | -0.1419 | -0.0816 | -0.1027 | -0.3489 | -0.2826 | -0.307  | -0.7229 |
| PY01109 | -0.0945 | 0.0485  | 0.253   | 0.8826  | -0.0684 | 0.3909  | 0.3309  | -0.3579 | 0.1109  | 0.0484  | -0.5772 | 0.0539  |
| PY03824 | -0.3205 | -0.1707 | 0.0744  | -0.0742 | -0.2543 | -0.3221 | -0.7368 | -0.2373 | -0.2238 | 0.1703  | 0.0253  | -0.4934 |
| PY06693 | -0.2223 | 0.0147  | 0.6283  | -0.7487 | -0.8835 | -0.2883 | 0.1809  | 0.1936  | 0.888   | 0.2813  | 0.1266  | 0.8122  |
| PY02351 | -0.075  | -0.0061 | -0.2634 | 0.2734  | -0.0102 | 0.1241  | -0.1216 | -0.0679 | -0.1286 | 0.069   | -0.2764 | 0.2357  |
| PY05179 | -0.1443 | -0.0638 | -0.4388 | 0.2364  | 0.0283  | -0.0591 | -0.272  | -0.007  | -0.0311 | 0.0704  | -0.2346 | 0.0659  |
| PY03629 | 0.0746  | 0.1024  | 0.3514  | 0.1873  | -0.0384 | 0.066   | -0.0397 | -0.4291 | -0.0984 | -0.2239 | -0.3554 | -0.0971 |
| PY01419 | 0.0759  | -0.1146 | -0.1161 | 0.3415  | -0.1923 | 0.0017  | -0.1827 | 0.146   | -0.1558 | -0.0022 | 0.1431  | -0.4778 |
| PY03786 | -0.737  | -0.3026 | 0.0856  | 0.7815  | 0.4531  | 0.1474  | -0.0939 | 0.4585  | -0.0127 | 0.7876  | 0.1276  | 0.1684  |
| PY01508 | -0.0156 | 0.3087  | -0.035  | -0.8904 | -0.3735 | 0.3853  | 0.0549  | -0.4992 | 0.0035  | -0.4022 | -0.6618 | -0.1729 |
| PY04498 | 0.0903  | -0.0912 | -0.0407 | 0.3674  | 0.348   | 0.2493  | 0.0714  | 0.1317  | -0.3045 | 0.3501  | 0.0286  | 0.1921  |
| PY02136 | -0.2484 | -0.1125 | 0.0114  | -0.4068 | 0.0254  | 0.15    | 0.2284  | 0.1112  | 0.1377  | -0.1066 | 0.0548  | 0.0577  |
| PY02255 | -0.4103 | -0.1457 | -0.0589 | -0.0069 | 0.0261  | -0.1366 | 0.0055  | 0.1056  | 0.0446  | 0.1412  | 0.4266  | -0.0972 |
| PY05489 | 0.2175  | 0.0964  | 0.0381  | -0.5061 | 0.3282  | 0.1593  | 0.2916  | -0.2797 | -0.059  | -0.3618 | -0.4841 | 0.3106  |
| PY01300 | -0.4726 | -0.1375 | -0.1381 | 0.4121  | 0.1458  | 0.0225  | -0.1887 | -0.0398 | 0.0323  | 0.1371  | 0.0009  | -0.2083 |
| PY05646 | -0.1928 | -0.1233 | 0.2408  | -0.3402 | -0.0833 | 0.0458  | -0.2323 | -0.2327 | 0.0063  | -0.0563 | 0.0975  | 0.0808  |
| PY04543 | 0.0986  | -0.5046 | -0.7548 | -1.1436 | -0.5233 | -0.2257 | 0.161   | -0.0866 | 0.1429  | -0.5177 | -0.6726 | -0.0442 |
| PY02050 | -0.4629 | -0.22   | -0.2576 | 0.3118  | -0.0295 | 0.0412  | 0.228   | 0.1782  | 0.4591  | -0.295  | 0.2229  | 0.1834  |
| PY03423 | 0.076   | 0.0174  | 0.034   | 0.3019  | 0.1757  | -0.3197 | 0.0032  | -0.1508 | 0.1272  | 0.3892  | -0.032  | 0.2018  |
| PY02798 | -0.4355 | 0.1902  | 0.3284  | -0.0469 | -0.645  | -0.2664 | 0.009   | 0.2986  | 0.3424  | -0.0917 | -0.0223 | -0.0527 |
| PY06549 | 0.4142  | 0.1632  | -0.3549 | 0.4123  | 0.2511  | 0.1832  | 0.3091  | 0.0702  | 0.0835  | 0.1901  | -0.4364 | -0.0522 |
| PY07311 | -0.7884 | -0.2115 | -0.2504 | -0.4544 | 0.3347  | -0.2137 | -0.2942 | -0.0626 | -0.0255 | 0.0473  | 0.1634  | -0.1653 |
| PY05659 | 0.0072  | 0.0204  | -0.0138 | 0.176   | 0.1864  | -0.0922 | -0.2878 | -0.366  | -0.2186 | -0.2666 | -0.0503 | -0.4029 |
| PY00497 | -1.2242 | -0.6225 | -0.2272 | -0.4742 | -0.5093 | -0.7208 | -0.3447 | 0.076   | 0.2022  | 0.179   | 0.6139  | -0.2337 |
| PY06695 | -0.4731 | -0.773  | -1.0096 | -0.7595 | -0.0922 | 0.0914  | 0.0542  | 0.5416  | 0.193   | -0.6489 | 0.4006  | -0.079  |
| PY01172 | -0.3859 | 0.037   | 0.3251  | -0.3482 | -0.4008 | -0.0194 | 0.1723  | -0.1323 | -0.0583 | -0.2473 | -0.3257 | -0.1575 |

|         |         |         |         |         |         |         |         |         |         |         |         |         |
|---------|---------|---------|---------|---------|---------|---------|---------|---------|---------|---------|---------|---------|
| PY03393 | -1.3947 | -0.3116 | 0.1553  | -0.2467 | -0.2962 | -0.0037 | 0.0253  | 0.5234  | 0.3793  | 0.2135  | 1.3359  | 0.052   |
| PY07365 | -1.0808 | -0.1877 | 0.0071  | -0.3921 | 0.0719  | 0.0725  | 0.0283  | 0.373   | 0.1926  | 0.0987  | 0.184   | -0.5524 |
| PY06051 | -0.0557 | -0.0098 | -0.2486 | -0.5026 | -0.1025 | -0.2039 | -0.2289 | -0.4467 | -0.1014 | -0.3495 | -0.6005 | -0.0328 |
| PY05447 | 0.3392  | 0.1841  | 0.2186  | -0.1    | 0.0101  | 0.0424  | 0.1563  | 0.064   | 0.136   | 0.0668  | -0.2954 | 0.2553  |
| PY03142 | -0.8922 | -0.1617 | 0.114   | -0.3814 | -0.0724 | -0.1535 | -0.292  | 0.0374  | 0.0402  | 0.2478  | 0.5457  | -0.0147 |
| PY01556 | 0.0982  | 0.2344  | -0.1713 | 0.1332  | 0.0576  | -0.0873 | 0.0975  | -0.1838 | -0.1395 | -0.1793 | -0.2351 | 0.1394  |
| PY00634 | 0.5007  | 0.2234  | 0.0774  | 0.1155  | -0.0574 | 0.0945  | -0.0932 | -0.0867 | 0.229   | -0.0357 | -0.234  | 0.234   |
| PY04041 | 0.3137  | 0.2448  | 0.5309  | 1.3509  | 0.7821  | 1.3035  | 0.4575  | 1.0335  | 0.8191  | 1.5524  | 1.0947  | 0.6163  |
| PY04358 | 0.3537  | 0.2328  | -0.1217 | 0.2571  | 0.7567  | 0.0292  | -0.0761 | -0.3742 | -0.3854 | -0.1966 | -0.459  | -0.1136 |
| PY00810 | -0.2068 | 0.13    | 0.0999  | -0.1    | -0.1288 | -0.0111 | -0.0299 | 0.0417  | 0.066   | -0.1311 | 0.0579  | -0.2531 |
| PY05897 | 0.4004  | 0.0844  | -0.0895 | -0.1462 | -0.1897 | -0.3102 | -0.2727 | -0.1176 | 0.1341  | -0.3217 | -0.266  | -0.6154 |
| PY00399 | -0.0927 | -0.117  | -0.0832 | -0.0171 | 0.0025  | 0.5441  | 0.099   | -0.1039 | 0.0705  | -0.1251 | -0.1415 | -0.3156 |
| PY00345 | -0.346  | 0.0534  | -0.2474 | -0.2516 | -0.5914 | -0.3746 | -0.1239 | -0.0836 | 0.3236  | -0.2346 | 0.0613  | 0.0201  |
| PY05906 | 0.4433  | 0.1162  | -0.0261 | 0.6215  | 0.3108  | 0.2513  | -0.1256 | 0.4148  | 0.0257  | 0.3545  | 0.4267  | 0.0939  |
| PY07196 | -0.397  | -0.0707 | -0.1646 | -0.1816 | 0.0165  | -0.1501 | -0.0727 | -0.1523 | 0.1873  | -0.134  | -0.188  | -0.1285 |
| PY05007 | 0.4311  | 0.1854  | -0.1851 | -0.0692 | 0.0142  | -0.1139 | -0.0169 | -0.3354 | 0.0979  | -0.4995 | 0.2412  | -0.048  |
| PY01761 | 0.4459  | -0.0713 | -0.3015 | 0.4831  | 0.5607  | -0.1086 | -0.2314 | -0.104  | -0.1468 | -0.0961 | -0.1891 | 0.0106  |
| PY06862 | -0.8033 | -0.2476 | -0.1885 | -0.7903 | -0.3763 | -0.2943 | 0.0191  | 0.2798  | -0.0101 | -0.2844 | 0.085   | -0.3554 |
| PY01790 | -0.625  | -0.2856 | -0.2161 | 0.0184  | 0.1632  | -0.0382 | 0.1301  | 0.0321  | -0.1096 | -0.0012 | 0.1218  | -0.0649 |
| PY00941 | -0.4895 | -0.0011 | -0.1543 | -0.4691 | -0.3362 | -0.3271 | -0.2617 | -0.0943 | -0.2164 | 1.009   | 0.293   | -0.1876 |
| PY03479 | 0.4558  | 0.2001  | -0.421  | 0.1906  | 0.6048  | -0.0302 | -0.2153 | -0.0755 | 0.0892  | 0.2124  | 0.1672  | 0.2157  |
| PY00826 | 0.1217  | -0.3098 | 0.1011  | -0.2929 | 0.0104  | 0.0567  | 0.0308  | -0.1799 | -0.1345 | -0.5696 | 0.1063  | -0.2289 |
| PY00531 | -0.7944 | -0.5425 | -0.8188 | 0.2036  | 0.0179  | -0.1069 | -0.1916 | 0.305   | -0.5641 | 0.4353  | 0.2666  | -0.3829 |
| PY03027 | -0.6401 | -0.1188 | 0.4868  | 0.1159  | -0.2365 | -0.3478 | -0.2871 | -0.132  | 0.112   | -0.4988 | 0.2028  | 0.0229  |
| PY06921 | -0.2705 | -0.5065 | -0.5049 | -0.0224 | 0.5968  | -0.1921 | -0.3289 | -0.1575 | -0.2325 | -0.0351 | -0.2001 | -0.0497 |
| PY06044 | 0.0365  | -0.0286 | -0.0949 | 0.4307  | 0.5706  | -0.2429 | 0.0455  | -0.1167 | -0.1704 | 0.3425  | 0.2403  | 0.1394  |
| PY02489 | -0.7398 | -0.2243 | -0.5087 | -0.3552 | -0.0772 | 0.0777  | -0.0879 | 0.0018  | 0.0715  | 0.1137  | 0.1491  | -0.2053 |
| PY06447 | -0.3738 | -0.1403 | 0.0402  | -0.426  | -0.3372 | -0.5715 | -0.284  | -0.0318 | -0.0243 | 0.0727  | 0.4631  | -0.0372 |
| PY01251 | -0.0367 | -0.047  | 0.0181  | -0.2821 | 0.3569  | -0.0605 | 0.1699  | -0.1309 | -0.2669 | -0.0561 | -0.124  | 0.0425  |
| PY02968 | -0.1359 | -0.2709 | -0.2873 | -0.3488 | 0.1685  | 0.2285  | 0.0185  | -0.0064 | -0.1023 | 0.2189  | 0.0541  | 0.3698  |
| PY02592 | -0.1168 | -0.1246 | -0.1924 | -0.3745 | -0.1407 | -0.1552 | -0.4843 | -0.3681 | -0.288  | -0.0879 | -0.0987 | -0.0675 |
| PY01956 | -1.2132 | -0.8208 | -0.742  | -0.9038 | -0.2346 | -0.2659 | -0.0378 | 0.4139  | 0.3497  | 0.4285  | 0.9526  | 0.2794  |
| PY07292 | -0.75   | -0.2242 | -0.0402 | 0.1784  | 0.031   | 0.2166  | 0.1641  | 0.1731  | 0.3336  | -0.0995 | 0.1022  | -0.2062 |
| PY01003 | 0.4443  | -0.0434 | -0.0593 | 0.239   | -0.1668 | -0.081  | -0.0662 | -0.404  | 0.1507  | 0.1775  | -0.4143 | 0.2229  |
| PY01264 | -0.0156 | 0.0933  | 0.4636  | 0.1527  | 0.0589  | 0.2087  | -0.2724 | -0.3561 | -0.4657 | -0.199  | -1.0473 | -0.4359 |
| PY07452 | -0.2369 | -0.0484 | -0.2122 | 0.2891  | -0.2438 | -0.0448 | -0.331  | 0.0232  | 0.2401  | 0.1054  | -0.272  | -0.0106 |
| PY02376 | 0.3251  | 0.2167  | 0.292   | -0.4473 | -0.0897 | 0.293   | 0.3855  | -0.2089 | -0.0224 | -0.4125 | -0.2188 | 0.1156  |
| PY06866 | -0.3586 | -0.076  | -0.1261 | -0.4422 | -0.3063 | -0.0177 | 0.0318  | -0.0573 | 0.0167  | -0.3489 | 0.0167  | -0.0457 |
| PY02957 | 0.0176  | 0.1364  | 0.4179  | 0.3739  | -0.2847 | 0.1083  | 0.3727  | 0.2742  | -0.6382 | -0.2631 | -0.1359 | 0.5139  |
| PY02967 | 0.1994  | -0.2705 | -0.2106 | 0.2089  | 0.4053  | 0.1897  | -0.3056 | 0.0406  | -0.3549 | 0.2598  | 0.0617  | -0.3302 |
| PY01329 | 0.3568  | 0.18    | 0.2903  | 0.0768  | 0.2448  | 0.4494  | 0.0892  | 0.059   | 0.0994  | 0.1217  | 0.0609  | 0.1318  |
| PY06737 | -0.3177 | -0.2687 | -0.0471 | 0.513   | 0.3831  | 0.0638  | -0.1155 | -0.0886 | -0.3437 | 0.0905  | 0.4581  | 0.0519  |
| PY03810 | 0.5429  | 0.3502  | 0.4423  | 0.0118  | -0.0437 | 0.204   | 0.3869  | -0.1289 | 0.2203  | -0.0298 | -0.3633 | 0.5036  |
| PY02060 | 0.8156  | 0.0105  | 0.1645  | 0.1422  | 0.0671  | -0.0112 | 0.3453  | -0.1417 | 0.3051  | 0.0863  | 0.0155  | 0.1501  |
| PY05107 | -0.1139 | -0.0022 | -0.0724 | -0.4145 | -0.2856 | -0.3219 | -0.1813 | -0.0809 | -0.2804 | -0.1453 | 0.1348  | -0.1253 |
| PY00619 | 0.3968  | 0.1437  | 0.6074  | -0.0218 | 0.0993  | 0.208   | 0.1844  | -0.1513 | -0.2504 | -0.3519 | -0.3758 | 0.0488  |
| PY02868 | 0.085   | 0.0496  | 0.0772  | 0.3303  | -0.1098 | 0.2671  | 0.0311  | 0.1205  | -0.9389 | 0.1403  | -0.2589 | -0.6835 |
| PY00153 | -0.604  | -0.2394 | -0.2021 | -1.2407 | -0.4771 | -0.1365 | 0.0644  | -0.1084 | 0.1858  | -0.577  | -0.0757 | -0.2982 |
| PY02619 | 0.2406  | -0.0476 | -0.1211 | 0.3215  | 0.1384  | 0.0197  | -0.2696 | 0.0131  | -0.2034 | 0.2181  | 0.1869  | -0.0812 |
| PY00918 | -0.1427 | -0.1027 | 0.3409  | -1.7989 | -1.3385 | 0.1871  | 0.4059  | 0.0892  | 0.8538  | -0.4279 | -0.2317 | 1.0359  |
| PY03906 | 0.3363  | 0.2446  | 0.0929  | 0.031   | -0.9928 | -0.4491 | 0.06    | 0.1855  | 0.2213  | -0.4667 | -0.5738 | 0.1579  |
| PY02580 | 0.5093  | 0.5353  | 0.2916  | -0.3662 | -0.5272 | -0.2469 | -0.5522 | -0.4252 | -0.455  | -0.7439 | -0.1498 | -0.5067 |
| PY04117 | -0.597  | -0.067  | 0.0906  | -0.8496 | -0.5502 | -0.5309 | -0.3871 | -0.0886 | -0.1908 | -0.016  | 0.2915  | -0.3131 |
| PY02840 | -0.0435 | 0.2558  | 0.3151  | 0.5095  | -0.0591 | -0.4571 | -0.1396 | -0.1068 | 0.1293  | 0.0087  | 0.2546  | 0.4391  |
| PY04643 | 0.1766  | -0.1115 | -0.311  | -0.5154 | -0.5141 | -0.1047 | -0.2058 | -0.2437 | -0.1369 | -0.2338 | -0.0836 | -0.051  |
| PY04372 | -0.1743 | -0.6829 | -0.6636 | -0.1611 | -0.1469 | -0.0938 | -0.6713 | -0.0596 | -0.3137 | -0.1511 | 0.0464  | -0.262  |
| PY05262 | -0.7283 | -0.2445 | -0.2135 | -0.4462 | -0.3243 | -0.1747 | 0.1389  | 0.2053  | 0.1494  | -0.1659 | 0.5453  | -0.2796 |
| PY04925 | 0.0655  | -0.1357 | -0.2945 | -0.0863 | -0.5737 | -0.2811 | -0.3393 | 0.0587  | -0.0794 | 0.1831  | -0.4335 | 0.0314  |
| PY07092 | -0.6266 | -0.241  | -0.5758 | 0.1731  | 0.0922  | 0.3361  | 0.4299  | 0.4684  | -0.4826 | 0.3663  | 0.1323  | -0.0354 |
| PY04940 | -0.6261 | -0.3851 | -0.6273 | -0.4615 | 0.0317  | -0.1267 | -0.1051 | 0.2274  | 0.1995  | 0.4447  | 0.44    | -0.1856 |
| PY04700 | -0.8771 | 0.3431  | 0.5999  | -0.3156 | 0.3403  | 0.0575  | 0.1971  | -0.1053 | -0.2153 | -0.373  | 0.3818  | -0.1507 |
| PY06969 | -0.5731 | -0.1615 | -0.1351 | 0.6772  | -0.0939 | -0.3312 | -0.0259 | 0.118   | 0.0142  | 0.1754  | 0.5494  | 0.1344  |
| PY00195 | -0.4438 | -0.213  | -0.1134 | 0.0888  | 0.3371  | 0.0787  | -0.0555 | 0.1163  | -0.1729 | 0.0154  | 0.3102  | 0.1841  |

|         |         |         |         |         |         |         |         |         |         |         |         |         |
|---------|---------|---------|---------|---------|---------|---------|---------|---------|---------|---------|---------|---------|
| PY07493 | -0.0584 | 0.008   | -0.3246 | 0.649   | 0.6136  | 0.1057  | -0.1843 | 0.5108  | -0.0726 | -0.0215 | 0.5783  | 0.2125  |
| PY03196 | -0.0996 | -0.0034 | -0.3324 | -0.2203 | -0.312  | -0.1421 | -0.2762 | 0.0507  | -0.1221 | 0.0788  | -0.3801 | -0.0839 |
| PY02831 | 0.113   | -0.0556 | -0.382  | 0.4683  | 0.3887  | 0.0489  | -0.1542 | 0.2816  | -0.1619 | 0.7203  | 0.0782  | -0.1493 |
| PY05060 | 0.5736  | 0.4664  | 0.1419  | -0.1474 | -0.089  | -0.0922 | 0.1856  | -0.1106 | 0.0256  | -0.4478 | -0.4565 | 0.0356  |
| PY05707 | 0.0884  | 0.2295  | 0.0335  | -0.4472 | -0.556  | -0.1926 | -0.1709 | -0.0793 | -0.2196 | -0.5796 | -0.0529 | -0.5506 |
| PY06013 | -0.5441 | -0.1686 | -0.2886 | 0.0282  | 0.2397  | -0.1041 | -0.1847 | -0.2075 | -0.2735 | -0.2754 | -0.2819 | -0.1099 |
| PY01755 | -0.1653 | -0.1528 | -0.5902 | 0.1198  | 0.1448  | -0.3998 | -0.3869 | 0.1106  | -0.2244 | 0.0896  | 0.243   | -0.5907 |
| PY06519 | -0.0454 | -0.0926 | -0.3793 | 0.1449  | 0.3945  | -0.1675 | -0.3303 | 0.0086  | -0.0546 | 0.5121  | 0.348   | 0.0521  |
| PY03648 | 0.0205  | 0.246   | 0.1525  | 0.245   | -0.1716 | -0.253  | 0.0106  | 0.0443  | 0.2773  | -0.2951 | 0.1852  | 0.0084  |
| PY04136 | -0.09   | -0.0567 | 0.2792  | -0.0205 | 0.2388  | 0.2622  | 0.235   | -0.0229 | 0.2048  | -0.2476 | -0.2063 | 0.2218  |
| PY06555 | 0.363   | 0.2267  | -0.1183 | -0.01   | -0.1654 | -0.1169 | -0.414  | -0.1908 | -0.2545 | -0.0607 | -0.3527 | -0.2841 |
| PY03999 | 0.9839  | 0.3242  | 0.3466  | 0.0652  | -0.1379 | -0.0132 | 0.0603  | -0.4075 | -0.1708 | -0.2096 | -0.7294 | 0.0989  |
| PY00461 | 0.0968  | -0.0856 | 0.0509  | 0.5085  | 0.5062  | 0.1453  | 0.1522  | 0.2125  | -0.1928 | 0.5591  | 0.2138  | 0.3703  |
| PY02175 | -0.0766 | 0.1532  | 0.0664  | -0.2867 | -0.2169 | 0.2123  | 0.1205  | -0.1019 | 0.087   | -0.1864 | -0.2373 | -0.105  |
| PY03458 | -0.7905 | 0.0474  | -0.0245 | -0.3106 | 0.0532  | -0.2321 | -0.1194 | 0.2321  | 0.0296  | 0.2073  | 0.7464  | -0.0732 |
| PY05949 | 0.5594  | 0.0395  | 0.0314  | 1.0947  | 1.138   | 1.1689  | -0.1463 | 0.6433  | -0.5285 | 0.9525  | 0.9297  | 0.1732  |
| PY06571 | -0.3728 | -0.0923 | -0.1637 | -0.4633 | -0.5036 | -0.1964 | -0.0056 | 0.0722  | 0.1602  | -0.6815 | -0.1255 | 0.1208  |
| PY00354 | -0.0443 | -0.3348 | -0.6115 | -0.5395 | -0.2389 | -0.1298 | 0.1848  | 0.167   | 0.4099  | 0.0307  | 0.0136  | 0.352   |
| PY00570 | -0.7384 | -0.0222 | -0.1097 | -0.1352 | -0.0816 | 0.1945  | 0.2444  | 0.573   | 0.1339  | 0.3241  | 0.768   | -0.0969 |
| PY07121 | -0.4748 | -0.3115 | -0.1498 | 0.0132  | 0.0889  | -0.3208 | -0.3188 | -0.1637 | -0.1511 | 0.3998  | 0.258   | 0.0798  |
| PY05467 | -0.1402 | -0.1277 | -0.367  | 0.1507  | 0.4229  | 0.265   | 0.1015  | 0.1374  | -0.2315 | -0.1335 | 0.2094  | -0.0534 |
| PY01906 | 0.4581  | 0.2067  | 0.1157  | 0.1317  | 0.1866  | -0.0141 | -0.0965 | -0.0686 | -0.2654 | 0.2809  | -0.3708 | 0.1437  |
| PY06396 | -0.7513 | -0.3695 | 0.2301  | -0.7863 | -0.7074 | -0.6444 | -0.5327 | -0.1578 | 0.2486  | 0.1651  | 0.9163  | -0.4828 |
| PY00789 | 0.5638  | 0.1642  | 0.3946  | 0.549   | 0.7317  | 0.4425  | 0.0612  | -0.1605 | -0.334  | 0.0107  | 0.0825  | 0.0612  |
| PY01020 | 0.4766  | 0.1195  | 0.4819  | 0.3709  | -0.2601 | -0.2034 | 0.6293  | 0.2148  | -0.3001 | -0.3421 | 0.1507  | 0.2553  |
| PY04494 | -1.19   | -0.3058 | 0.0965  | 0.6576  | -0.1889 | -0.0393 | -0.1555 | 0.0432  | 0.0489  | -0.0038 | 0.4552  | -0.3743 |
| PY03516 | 0.5388  | 0.1733  | -0.294  | 0.1998  | 0.1675  | -0.089  | -0.0249 | 0.1103  | -1.1439 | 0.0482  | 0.1858  | -0.2119 |
| PY02428 | -0.6804 | -0.5369 | 0.2675  | 0.599   | 0.1187  | 0.1516  | 0.1815  | 0.2499  | -1.6556 | -0.113  | -0.2568 | -0.7623 |
| PY05460 | 0.2946  | 0.131   | 0.2637  | 0.6417  | 0.3789  | 0.5123  | 0.1782  | 0.2895  | -0.6258 | 0.6438  | -0.3241 | -0.0536 |
| PY07469 | 0.1174  | 0.1612  | 0.0345  | -0.566  | -0.2974 | -0.2201 | 0.0298  | -0.1511 | 0.0332  | -0.1852 | -0.2304 | 0.1264  |
| PY05170 | -0.4324 | 0.0964  | -0.4229 | 1.1205  | 0.4865  | 0.2327  | -0.0933 | 0.8976  | -0.0798 | 0.9655  | 0.4186  | -0.122  |
| PY06440 | 0.215   | -0.1093 | -0.1827 | 0.3163  | 0.3336  | 0.0108  | -0.1456 | 0.1336  | -0.146  | 0.3803  | 0.0789  | -0.0052 |
| PY07289 | -0.3479 | 0.0311  | 0.1209  | -0.2749 | -0.6789 | -0.0845 | 0.0877  | 0.2124  | 0.2078  | -0.631  | -0.0132 | -0.0215 |
| PY05783 | 0.2396  | 0.2363  | 0.1738  | 1.4105  | 1.2581  | 1.4634  | 0.4234  | 1.0873  | 0.1548  | 1.545   | 1.3813  | 0.7258  |
| PY03241 | -0.9225 | -0.0925 | 0.1668  | -0.4221 | -0.1691 | 0.0982  | 0.0665  | 0.1564  | -0.1457 | 0.1187  | 0.2099  | -0.2938 |
| PY05133 | 0.9885  | 0.5825  | 1.0732  | 0.5992  | -0.5118 | 0.196   | 0.4205  | -0.0308 | 0.3094  | -0.6881 | -0.7087 | 0.2037  |
| PY04794 | -1.3251 | -0.3182 | -0.3703 | -0.6075 | 0.1167  | -0.2191 | -0.1223 | -0.2236 | -0.308  | -0.5313 | 0.1573  | -0.4891 |
| PY01145 | -0.5095 | -0.3844 | -0.241  | -0.5047 | -0.2093 | -0.3049 | -0.0217 | -0.0495 | 0.189   | -0.1677 | -0.0585 | 0.2515  |
| PY07157 | -0.507  | 0.0025  | 0.0052  | -0.5787 | -0.0782 | -0.1708 | -0.2872 | -0.1945 | -0.4057 | -0.2547 | 0.108   | -0.4101 |
| PY02275 | -0.7423 | 0.0237  | 0.0509  | -0.0887 | -0.471  | -0.1542 | -0.1449 | 0.1564  | 0.0834  | -0.0746 | 0.2219  | -0.1537 |
| PY03284 | 0.1734  | -0.2255 | -0.9977 | -0.2157 | -0.0778 | -0.2011 | -0.2556 | -0.0978 | -0.0088 | 0.0193  | 0.0986  | -0.001  |
| PY01646 | 0.4719  | 0.4986  | 0.6887  | 0.3747  | -0.4655 | 0.3308  | 0.3651  | 0.0479  | 0.2645  | 0.0899  | -0.7993 | 0.3076  |
| PY01461 | 0.0629  | -0.0416 | -0.1343 | -0.5575 | 0.1668  | -0.2241 | -0.0191 | -0.3494 | -0.1221 | -0.2487 | -0.2894 | -0.0333 |
| PY05000 | -1.0532 | -0.1195 | -0.1923 | -1.341  | -0.9925 | -0.47   | 0.0757  | 0.1796  | 0.0816  | -0.6355 | 0.289   | -0.4612 |
| PY05674 | 0.1265  | 0.1953  | -0.473  | -0.1116 | -0.3174 | -0.15   | 0.4682  | 0.3261  | 0.3474  | -0.0879 | -0.1551 | 0.3325  |
| PY05603 | -0.2962 | -0.0801 | -0.2416 | 0.4411  | 0.3325  | -0.1709 | -0.156  | 0.0727  | -0.022  | 0.3916  | 0.1097  | -0.0447 |
| PY04364 | 0.453   | -0.2244 | -0.5821 | -0.1441 | 0.0088  | -0.1863 | -0.1905 | -0.2661 | -0.2549 | -0.0474 | -0.2449 | -0.0553 |
| PY01973 | -0.0359 | 0.0352  | -0.0936 | -0.1284 | #####   | -0.2743 | -0.221  | -0.3024 | -0.2442 | -0.2315 | 0.1064  | -0.1471 |
| PY05727 | 0.333   | 0.1067  | 0.3463  | -0.0548 | -0.0788 | -0.056  | -0.0676 | -0.1045 | -0.2837 | -0.0152 | -0.2627 | 0.0722  |
| PY01579 | -0.2349 | -0.04   | -0.189  | 0.13    | 0.4154  | 0.1039  | -0.1111 | 0.2377  | -0.0701 | 0.4412  | -0.0744 | -0.076  |
| PY04227 | -0.0613 | -0.2294 | -0.0741 | 0.0071  | -0.1259 | -0.1734 | -0.123  | -0.0623 | -0.1057 | 0.5669  | -0.0034 | 0.1209  |
| PY01279 | -0.4196 | -0.2598 | -0.6736 | -0.393  | -0.2069 | 0.1381  | -0.067  | -0.3707 | -0.4483 | -0.5932 | -0.3321 | 0.0533  |
| PY05583 | 0.4819  | 0.5674  | 1.171   | 0.0228  | -0.5915 | 0.1426  | 0.4607  | -0.3231 | 0.3928  | -0.1845 | -0.6904 | 0.1228  |
| PY00589 | 0.8962  | 0.3268  | 0.1804  | -0.2985 | -0.269  | 0.4279  | 0.492   | -0.0769 | 0.099   | 0.0299  | -0.0954 | 0.2096  |
| PY03060 | -0.6011 | -0.6146 | -0.9905 | -0.7439 | -0.6743 | -0.0809 | 0.1485  | 0.5277  | -0.2392 | 0.2701  | 0.2893  | 0.2617  |
| PY04813 | -0.0954 | 0.0649  | -0.0202 | -0.3459 | -0.3321 | 0.0319  | 0.0929  | -0.2128 | -0.0921 | -0.0267 | -0.3111 | -0.1457 |
| PY02995 | 0.4962  | -0.1793 | 0.3295  | -0.4312 | 0.1037  | -0.0843 | -0.1269 | -0.2685 | -0.0703 | 0.3525  | 0.1588  | 0.3565  |
| PY00797 | 0.5066  | -0.113  | -0.4119 | -0.4622 | -0.4426 | -0.3604 | -0.3191 | -0.0109 | -0.0069 | 0.1911  | 0.1457  | -0.2054 |
| PY04664 | 0.0926  | -0.0006 | 0.2802  | 0.2015  | 0.024   | 0.067   | -0.0745 | -0.2606 | -0.052  | -0.022  | -0.0292 | -0.1107 |
| PY03661 | -1.0108 | -0.2619 | 0.0609  | 0.2647  | -0.0384 | -0.2045 | -0.179  | 0.2383  | -0.0782 | 0.2148  | 0.3099  | -0.3967 |
| PY06471 | -0.4815 | -0.2192 | -0.0384 | 0.7485  | 0.4436  | 0.0514  | -0.0583 | 0.3957  | -0.0814 | 0.1741  | 0.9342  | -0.0164 |
| PY05159 | -0.7814 | -0.2879 | -0.4095 | -0.3297 | -0.5407 | -0.2297 | -0.3953 | -0.0686 | 0.0739  | -1.3014 | 0.1849  | 0.2086  |
| PY02861 | -0.5953 | 0.1003  | -0.0049 | -0.3847 | -0.1985 | 0.0013  | 0.2053  | 0.1889  | 0.2339  | 0.7052  | 0.1295  | 0.1694  |

|         |         |         |         |         |         |         |         |         |         |         |         |         |
|---------|---------|---------|---------|---------|---------|---------|---------|---------|---------|---------|---------|---------|
| PY06627 | -0.3694 | 0.0736  | 0.2017  | -0.0552 | 0.2451  | 0.0072  | -0.0222 | 0.3158  | 0.0706  | -0.1818 | 0.4816  | -0.2386 |
| PY07482 | 0.3901  | 0.2898  | -0.0282 | 0.608   | 0.0594  | -0.0533 | -0.1605 | -0.3003 | -0.1141 | -0.1579 | -0.2917 | -0.1543 |
| PY02485 | -0.7917 | -0.3304 | 0.0528  | -0.3718 | -0.3231 | -0.3491 | 0.3758  | 0.0509  | 0.6183  | 0.0368  | 0.1316  | 0.7885  |
| PY02335 | -0.6296 | 0.0247  | 0.2314  | 0.2768  | 0.3041  | 0.1148  | -0.2241 | 0.155   | -0.0498 | 0.4988  | 0.5951  | -0.1607 |
| PY00221 | -0.6203 | -0.1635 | -0.0992 | -1.2815 | 0.2542  | 0.1911  | 0.1079  | -0.1998 | -0.3072 | -0.2793 | -0.2143 | -0.0387 |
| PY06651 | -1.1486 | -0.2997 | 0.1151  | -0.0013 | 0.0027  | -0.172  | -0.3134 | -0.1084 | -0.2517 | -0.6229 | 0.4644  | -0.7735 |
| PY03688 | -0.6446 | -0.1584 | 0.1724  | -0.2707 | -0.1718 | 0.3805  | 0.1526  | 0.2005  | -0.0512 | -0.5555 | -0.1231 | -0.3226 |
| PY03255 | 0.3965  | 0.1635  | -0.0345 | -0.0445 | -0.1897 | -0.1808 | 0.133   | -0.2171 | 0.0377  | -0.2612 | -0.3257 | 0.2849  |
| PY04947 | -0.123  | -0.0434 | -0.1198 | -0.0762 | 0.0152  | -0.1372 | -0.2851 | -0.0894 | -0.2822 | -0.2951 | -0.2651 | -0.0018 |
| PY01567 | -0.0888 | 0.1471  | -0.1582 | 0.0896  | -0.0843 | -0.3322 | -0.1383 | -0.0176 | -0.2391 | -0.0788 | 0.0383  | 0.2916  |
| PY04559 | -0.3174 | 0.2101  | 0.4837  | 0.597   | 0.6113  | 0.3385  | -0.0497 | 0.2761  | 0.0821  | 0.3618  | 0.36    | -0.1427 |
| PY07272 | -0.57   | -0.2316 | 0.1061  | -0.9685 | -0.8031 | -0.2582 | -0.1178 | 0.1074  | 0.3536  | -0.1309 | -0.3699 | -0.0222 |
| PY05368 | 0.6767  | 0.0565  | 0.3092  | 0.1692  | 1.3897  | 0.097   | 0.0148  | -0.4128 | -0.3263 | -0.0501 | -0.3748 | 0.1699  |
| PY03220 | 0.0917  | -0.0324 | -0.3115 | 0.0165  | 0.3505  | -0.0743 | 0.1278  | -0.154  | -0.1597 | 0.0213  | 0.1613  | 0.1969  |
| PY05627 | -0.0138 | 0.1008  | 0.0585  | -0.1553 | 0.102   | 0.2595  | 0.2177  | -0.1312 | -0.033  | 0.0231  | -0.3957 | 0.1556  |
| PY01698 | 0.2089  | 0.2773  | 0.4534  | -0.4028 | -0.1177 | 0.4935  | 0.6023  | -0.021  | 0.084   | -0.0352 | -0.465  | 0.3004  |
| PY01337 | -0.5278 | -0.3603 | -0.106  | -0.0016 | -0.0396 | -0.0757 | 0.0805  | 0.1384  | -0.0538 | 0.3087  | 0.399   | 0.3952  |
| PY02408 | -0.7317 | -0.0313 | -0.0274 | -0.3241 | -0.8278 | -0.5892 | -0.178  | 0.0013  | 0.2341  | -0.1378 | 0.0446  | -0.2362 |
| PY04475 | 0.1162  | 0.3701  | 0.1569  | 0.6759  | -0.7411 | 0.0673  | -0.284  | 0.1589  | 0.0049  | 0.0356  | 0.1742  | -0.4878 |
| PY01167 | 0.086   | -0.1573 | -0.0884 | 0.0174  | -0.1186 | -0.0799 | -0.325  | -0.1965 | -0.1505 | -0.2028 | -0.2098 | -0.1145 |
| PY01412 | 0.6329  | -0.1393 | -0.0808 | 0.0992  | 0.0596  | 0.2399  | -0.1136 | 0.0093  | 0.0096  | 0.3224  | -0.0806 | -0.0153 |
| PY06785 | -0.7729 | -0.5273 | -0.4975 | 0.1272  | 0.3869  | -0.1837 | -0.0703 | 0.0763  | 0.0553  | -0.2141 | 0.3496  | -0.0304 |
| PY03482 | 0.0807  | 0.1747  | 0.2347  | -0.1252 | -0.2931 | -0.2007 | 0.0781  | -0.2486 | 0.1895  | -0.3245 | 0.199   | 0.1456  |
| PY01732 | -0.0322 | -0.0091 | 0.0772  | -0.407  | -0.1881 | 0.0582  | 0.0192  | -0.0462 | -0.004  | -0.1763 | 0.0994  | 0.0493  |
| PY07379 | 0.2952  | -0.0885 | 0.3025  | -0.0761 | 0.3165  | 0.5743  | -0.0786 | 0.0318  | -0.0887 | -0.149  | -0.6274 | -0.2619 |
| PY04944 | -0.0872 | 0.0083  | 0.109   | -0.4327 | 0.162   | 0.0952  | -0.1406 | -0.3079 | -0.1102 | -0.1157 | 0.129   | -0.2332 |
| PY02775 | 0.276   | -0.0034 | 0.0192  | -0.1961 | 0.0075  | -0.2711 | -0.2512 | -0.2063 | -0.1221 | -0.6466 | 0.4158  | -0.3006 |
| PY04443 | 0.0752  | -0.168  | -0.0665 | -0.1335 | 0.8054  | -0.2786 | -0.1291 | -0.1077 | -0.3138 | 0.0298  | 0.1776  | 0.0148  |
| PY02359 | 0.3385  | -0.0649 | -0.1492 | -0.6131 | 0.0842  | -0.2963 | 0.0208  | -0.2627 | -0.563  | -0.646  | -0.2674 | -0.0353 |
| PY07825 | 0.4482  | -0.0273 | 0.1686  | 0.4848  | 0.017   | 0.1724  | 0.2119  | -0.1459 | 0.0374  | -0.0363 | -0.6902 | 0.1712  |
| PY02073 | -0.0274 | 0.0291  | 0.1086  | 0.4877  | 0.1345  | -0.2663 | -0.258  | 0.3972  | -0.1945 | 0.6417  | 0.4209  | -0.2802 |
| PY02780 | 0.3174  | -0.0328 | 0.0908  | 0.179   | 0.037   | 0.1257  | -0.0993 | -0.088  | -0.2822 | -0.7271 | -0.1225 | 0.0477  |
| PY00117 | 0.3585  | 0.0621  | 0.0643  | 0.5223  | 0.2664  | -0.0538 | 0.0406  | -0.4216 | -0.5097 | -0.479  | -0.6194 | -0.3668 |
| PY03772 | -1.2298 | -0.4611 | -0.265  | -0.017  | -0.2672 | -0.4518 | -0.3582 | 0.0911  | -0.1654 | 0.0881  | 0.7018  | -0.0155 |
| PY05099 | 0.0726  | 0.0492  | -0.0517 | 0.5782  | 0.3475  | 0.0612  | 0.2538  | 0.1692  | -0.411  | 0.6123  | -0.0354 | -0.0502 |
| PY02228 | -0.3339 | -0.6094 | -0.3388 | -0.494  | 0.2814  | -0.0083 | 0.0559  | 0.3004  | 0.1096  | -0.0944 | 0.3914  | -0.2405 |
| PY04527 | -0.6647 | -0.5406 | -0.521  | -0.251  | -0.7362 | -0.2989 | 0.1271  | 0.5729  | 0.6406  | -0.7547 | 0.4658  | -0.2679 |
| PY04581 | 0.1766  | 0.1101  | -0.3345 | 0.2316  | 0.3541  | -0.3317 | -0.5275 | -0.349  | -0.3421 | 0.1712  | -0.0981 | -0.4889 |
| PY06645 | -0.9583 | -0.2192 | 0.1114  | 0.108   | 0.4958  | 0.9983  | 0.2386  | 0.6852  | 0.3896  | -0.0235 | 1.1478  | -0.4395 |
| PY01748 | 0.2224  | 0.0904  | 0.0877  | 0.3495  | 0.1585  | -0.6815 | 0.0398  | 0.282   | 0.0317  | 0.0611  | 0.0625  | -0.0029 |
| PY06330 | -0.3198 | 0.2995  | -0.4151 | -0.0622 | 0.6026  | 0.4978  | 0.145   | 0.2418  | -0.1387 | 0.081   | 0.1393  | -0.5045 |
| PY07244 | 0.1768  | 0.0837  | -0.0021 | -0.1371 | -0.0696 | 0.3429  | 0.331   | 0.1464  | 0.1202  | 0.1849  | 1.2646  | -0.2552 |
| PY00759 | 0.0898  | 0.0019  | -0.1967 | 0.5279  | 0.0293  | 0.0637  | -0.145  | 0.0928  | 0.0304  | 0.5874  | -0.1775 | -0.4236 |
| PY01453 | -0.0607 | 0.1413  | 0.3139  | 0.4062  | 0.1893  | 0.1449  | 0.1132  | 0.0146  | -0.0667 | 0.0853  | -0.1734 | 0.2083  |
| PY04739 | -0.3558 | -0.2162 | -0.2747 | -0.1048 | -0.136  | 0.2535  | 0.0428  | -0.0076 | -0.1986 | 0.104   | -0.1892 | 0.0168  |
| PY02190 | 1.1177  | 0.416   | 0.6506  | 0.5584  | 1.0337  | -0.2148 | 0.0891  | -0.4391 | 0.0154  | -0.4857 | -1.1422 | 0.2246  |
| PY06822 | -1.1833 | -1.2368 | -0.8975 | -0.2118 | -0.0168 | -0.0195 | 0.0053  | 0.2116  | 0.3005  | 0.0585  | 0.5755  | -0.2642 |
| PY00346 | -0.331  | 0.1971  | 0.0129  | -0.3533 | -0.4917 | -0.13   | -0.1699 | 0.1034  | 0.1877  | -0.7098 | 0.296   | -0.3259 |
| PY01894 | 0.3118  | -0.0481 | 0.2763  | 0.1619  | 0.0701  | -0.0554 | -0.1403 | -0.2335 | 0.4546  | -0.1948 | 0.0129  | 0.1581  |
| PY02787 | -0.019  | 0.0287  | 0.1226  | -0.0179 | -0.1056 | 0.1602  | 0.0599  | -0.0361 | 0.0559  | -0.3452 | -0.2807 | -0.1037 |
| PY06912 | 0.6368  | 0.4727  | 0.0395  | -0.2297 | -0.2485 | -0.1796 | 0.2273  | -0.0232 | 0.3726  | -0.1658 | 0.319   | 0.4166  |
| PY03560 | 0.2029  | 0.0655  | -0.001  | -0.2125 | -0.2053 | -0.2536 | -0.0206 | -0.0808 | -0.0755 | -0.1376 | 0.0765  | -0.0732 |
| PY06434 | -0.2235 | -0.3818 | -0.0802 | -0.2249 | -0.0597 | -0.0909 | 0.2302  | 0.0399  | 0.2557  | -0.2432 | -0.141  | 0.0379  |
| PY00995 | -0.0525 | 0.0411  | -0.2371 | 0.3333  | 0.242   | 0.3132  | -0.219  | 0.0755  | -0.3955 | 0.548   | -0.1067 | -0.2558 |
| PY07584 | -0.3319 | -0.0362 | -0.2291 | -0.0886 | -0.2044 | 0.3804  | 0.3183  | 0.3769  | 0.28    | -0.0056 | -0.2624 | -0.1725 |
| PY05978 | -0.1841 | -0.1063 | 0.0875  | 0.3675  | 0.5944  | 0.52    | -0.0093 | 0.0556  | -0.0813 | -0.0707 | -0.0577 | -0.2568 |
| PY03302 | 0.2579  | 0.3717  | 0.1565  | -0.6569 | -0.2978 | -0.3873 | -0.2079 | -0.4981 | -0.3006 | -0.4028 | -0.3154 | -0.2655 |
| PY01813 | 0.2823  | 0.0127  | 0.4404  | -0.0358 | -0.1592 | -0.2112 | 0.1864  | -0.1564 | 0.0771  | -0.37   | 0.1683  | 0.1464  |
| PY03376 | -0.426  | -0.0733 | -0.2933 | -0.3341 | 0.5823  | 0.4362  | 0.2806  | 0.0211  | -0.3042 | -0.2059 | -0.2155 | -0.3278 |
| PY03107 | -0.3224 | -0.059  | 0.0365  | 0.1888  | -0.0209 | -0.0757 | -0.1545 | 0.0952  | 0.1214  | 0.0377  | -0.0252 | 0.0618  |
| PY05475 | 0.518   | 0.3505  | -0.0549 | 0.7067  | 0.3382  | 0.2151  | -0.1357 | 0.1183  | 0.0078  | 0.6535  | -0.0138 | -0.5027 |
| PY03653 | 0.4675  | 0.3112  | 0.2441  | -0.3131 | 0.2546  | -0.0087 | 0.2691  | -0.113  | 0.0953  | -0.4448 | -0.0396 | 0.2507  |
| PY00696 | -0.9465 | -0.1617 | -0.5765 | 0.122   | -0.3183 | -0.04   | -0.0941 | 0.28    | -0.0114 | 0.4359  | 0.4892  | -0.0534 |

|         |         |         |         |         |         |         |         |         |         |         |         |         |
|---------|---------|---------|---------|---------|---------|---------|---------|---------|---------|---------|---------|---------|
| PY04751 | -0.045  | -0.3463 | -0.4082 | 0.0654  | 0.0807  | 0.0795  | 0.1882  | 0.0024  | 0.1732  | 0.3447  | 0.037   | 0.2021  |
| PY06305 | -0.1119 | 0.2036  | -0.1106 | -0.2853 | -0.0727 | 0.1369  | 0.19    | -0.4898 | 0.0121  | -0.5489 | -0.2323 | -0.125  |
| PY06423 | 0.4486  | 0.2463  | -0.0138 | -0.3967 | -0.0875 | -0.1217 | 0.2213  | -0.2646 | 0.0998  | -0.462  | 0.3436  | 0.671   |
| PY02970 | 0.4224  | 0.2323  | 0.3086  | 0.2246  | 0.2465  | -0.0745 | -0.0115 | -0.3383 | -0.3778 | -0.2048 | -0.0423 | 0.1445  |
| PY06038 | 0.5351  | -0.0171 | 0.0485  | 0.4557  | -0.0187 | -0.0012 | 0.757   | 0.2846  | -0.2042 | 1.1439  | -0.2404 | 0.5297  |
| PY00908 | -0.0295 | -0.2061 | -0.2951 | -1.3642 | -0.3597 | -0.3601 | -0.2279 | -0.2486 | -0.2163 | -0.5768 | -0.0911 | 0.0554  |
| PY03797 | -1.3878 | -0.3843 | -0.0172 | 0.4136  | -0.2639 | -0.063  | -0.1792 | 0.5528  | 0.1602  | 0.1531  | 0.8148  | -0.1478 |
| PY00136 | 0.1704  | 0.1248  | 0.3103  | 0.4632  | -0.5269 | 0.0794  | 0.1548  | -0.0563 | -0.015  | -0.2148 | -0.5493 | -0.0924 |
| PY02372 | 0.0148  | 0.0735  | -0.1527 | 0.047   | -0.0932 | -0.0085 | 0.2164  | 0.2613  | 0.6225  | 0.3416  | 0.0137  | 0.3722  |
| PY01530 | -0.5916 | -0.4004 | -0.2359 | 0.0213  | -0.2583 | -0.0815 | 0.0964  | 0.2457  | 0.2521  | -0.1724 | 0.7269  | -0.2512 |
| PY03046 | 0.2085  | -0.2201 | 0.0736  | -0.1463 | -0.0062 | -0.2769 | 0.1077  | -0.0336 | -0.0157 | 0.0308  | 0.24    | 0.1299  |
| PY03288 | -0.1944 | -0.5086 | -0.4655 | -0.4504 | -0.2724 | -0.5318 | -0.2248 | -0.1889 | -0.2136 | 0.2862  | 0.6095  | -0.0461 |
| PY03207 | -0.3149 | -0.0978 | -0.0614 | -0.0852 | -0.0715 | 0.4985  | 0.0919  | -0.0344 | -0.1858 | -0.3795 | -0.2053 | -0.4807 |
| PY01438 | 0.14    | 0.0179  | 0.3756  | -0.1042 | -0.103  | 0.5911  | 0.2762  | -0.087  | -0.3653 | -0.4719 | -0.3769 | -0.2154 |
| PY02081 | 0.347   | 0.2253  | 0.489   | -0.4577 | -0.1588 | -0.0119 | 0.4102  | -0.2535 | 0.2603  | -0.3514 | -0.1646 | 0.374   |
| PY04886 | -0.6297 | -0.3783 | -0.5903 | -0.0096 | 0.1175  | -0.2307 | -0.2755 | 0.1158  | 0.0094  | 0.2145  | 0.3321  | -0.1772 |
| PY00163 | 0.6574  | 0.2025  | 0.2753  | 0.336   | -0.0581 | 0.4326  | 0.1463  | -0.214  | -0.1509 | -0.0692 | -0.2842 | 0.2205  |
| PY02343 | -0.7779 | -0.286  | -0.5911 | 0.8053  | -0.0828 | 0.0416  | 0.0495  | 0.204   | 0.2145  | 0.3802  | 0.0417  | 0.2115  |
| PY04507 | 0.6742  | 0.2655  | 0.3078  | 0.0404  | 0.195   | -0.2194 | -0.0514 | -0.3565 | -0.1633 | -0.2305 | -0.2356 | 0.1219  |
| PY01574 | 0.354   | 0.2383  | -0.0972 | 0.5275  | 0.1797  | -0.0381 | -0.1695 | -0.1452 | -0.3767 | -0.3962 | 0.1127  | -0.3406 |
| PY06845 | 0.3067  | 0.2058  | 0.1121  | -0.1742 | -0.047  | 0.0672  | -0.1399 | -0.0804 | -0.1369 | -0.1205 | -0.1103 | 0.144   |
| PY04970 | 0.6808  | 0.1007  | 0.2402  | 0.4277  | -0.0913 | 0.0355  | -0.0207 | -0.0843 | -0.2317 | -0.4686 | -0.4453 | -0.0928 |
| PY04741 | 0.1625  | -0.0294 | -0.1443 | 0.2247  | 0.0761  | -0.0297 | -0.2184 | 0.158   | -0.174  | -0.025  | -0.0721 | -0.6331 |
| PY05614 | -0.8967 | -0.5171 | -0.2042 | 0.4692  | 0.4896  | 0.1223  | -0.0427 | 0.0559  | 0.1554  | 0.5673  | 0.4254  | 0.2876  |
| PY02026 | 0.0508  | 0.2055  | 0.2889  | -0.1133 | -0.1362 | -0.2736 | 0.1614  | 0.1045  | 0.1221  | 0.0991  | -0.0589 | 0.2059  |
| PY00273 | -0.6603 | -0.4565 | -0.4537 | -0.1867 | 0.021   | -0.0606 | 0.0995  | 0.3341  | 0.2197  | 0.0623  | -0.0813 | -0.176  |
| PY03266 | 0.313   | 0.1439  | 0.454   | -0.5143 | -1.0737 | 0.1788  | 0.4637  | 0.0999  | 0.3774  | 0.1811  | -0.0148 | 0.5115  |
| PY04505 | 0.582   | 0.0894  | 0.0533  | 0.5736  | -0.2661 | -0.2011 | -0.3106 | 0.3887  | 0.2888  | -0.0567 | -0.8716 | -0.1208 |
| PY07008 | 0.3023  | 0.3944  | 0.2674  | -0.227  | -0.0402 | -0.2052 | -0.1105 | -0.313  | 0.0579  | 0.0582  | -0.0224 | 0.2962  |
| PY01272 | 0.1671  | 0.0176  | -0.2523 | -0.3818 | 0.1711  | 0.21    | 0.0752  | -0.19   | -0.2288 | -0.2598 | -0.3705 | 0.0963  |
| PY01533 | 0.4773  | -0.0502 | 0.1422  | 0.5117  | 0.848   | 0.1373  | -0.1528 | 0.0992  | -0.2196 | 0.2587  | 0.5424  | 0.1775  |
| PY06611 | -0.6484 | -0.4192 | -0.3853 | 0.0644  | -0.1547 | 0.0377  | -0.0668 | 0.2068  | 0.2352  | -0.6676 | 0.0765  | 0.1478  |
| PY05954 | -0.0913 | 0.0313  | -0.121  | 2.3846  | -0.7245 | -0.4633 | 0.0474  | -0.1057 | 0.4111  | 0.1279  | -0.2932 | 0.4717  |
| PY04699 | -0.1252 | -0.2748 | -0.5083 | -0.1585 | 0.0571  | -0.2838 | -0.3161 | -0.3383 | -0.4132 | -0.3948 | -0.6195 | 0.0559  |
| PY05457 | 0.8186  | 0.3199  | 0.7514  | 0.4378  | 0.1152  | 0.0787  | 0.343   | -0.1559 | 0.0477  | -0.2908 | -0.228  | 0.3915  |
| PY03794 | 0.215   | -0.0424 | 0.1079  | -0.5824 | -0.296  | -0.5039 | -0.1654 | -0.3442 | -0.1071 | -0.3508 | -0.141  | 0.1794  |
| PY04034 | 0.2467  | 0.2927  | 0.1759  | -0.3544 | -0.1239 | 0.4364  | 0.5941  | -0.1676 | 0.2933  | -0.0091 | -0.716  | 0.3631  |
| PY05840 | -0.3998 | -0.1583 | -0.2771 | -0.2183 | -0.0058 | -0.4098 | -0.1724 | -0.0034 | -0.0548 | 0.0045  | 0.2043  | 0.1735  |
| PY05881 | 0.313   | 0.1606  | 0.3526  | 0.304   | -0.0539 | -0.0746 | -0.0671 | -0.3049 | -0.1886 | -0.1823 | -0.3333 | -0.146  |
| PY01440 | -0.2441 | -0.0151 | -0.102  | -0.1037 | 0.1223  | -0.1014 | 0.2075  | 0.1155  | 0.086   | 0.1384  | 0.073   | 0.0797  |
| PY06108 | -0.9711 | 0.0099  | -0.0264 | -0.1327 | 0.1213  | -0.1753 | -0.1643 | 0.2148  | 0.1516  | 0.4816  | 0.3112  | -0.1    |
| PY00581 | -0.1912 | -0.2615 | -0.9362 | 0.4308  | 0.7567  | 0.105   | -0.2613 | -0.1146 | -0.3839 | 0.2326  | -0.0246 | -0.1205 |
| PY06114 | 0.1406  | -0.2797 | -0.3432 | 0.4139  | 0.3934  | 0.0894  | -0.131  | -0.0068 | -0.5135 | 0.245   | 0.0809  | -0.0309 |
| PY00905 | -0.4855 | -0.4474 | -0.6659 | 0.0501  | 0.2418  | -0.4541 | -0.4843 | 0.0172  | 0.3176  | 0.6261  | 0.5066  | 0.3142  |
| PY02887 | 0.3748  | -0.072  | 0.0441  | 0.496   | 0.3016  | -0.0073 | -0.2145 | -0.3394 | -0.3958 | -0.6109 | -0.4106 | -0.1991 |
| PY04608 | 0.9701  | 0.7352  | 0.6771  | 0.3539  | -0.3195 | 0.2451  | 0.2052  | -0.2338 | -0.756  | -0.3835 | -0.3077 | -0.0559 |
| PY03461 | 0.3238  | 0.0891  | 0.4218  | 0.1151  | -0.2957 | -0.2389 | -0.1808 | -0.4131 | -0.2    | -0.3067 | -0.5202 | -0.1846 |
| PY05400 | -0.6664 | 0.0567  | 0.549   | -0.2808 | -0.7069 | -0.1206 | 0.2121  | 0.2748  | 0.2518  | -0.2049 | 0.2691  | -0.2296 |
| PY03100 | -1.2277 | -0.4604 | -0.3855 | -0.3673 | -0.7382 | -0.378  | -0.0348 | 0.4614  | 0.4607  | -0.8667 | 0.197   | -0.2908 |
| PY00939 | -1.2317 | -0.2053 | -0.5292 | 0.1388  | -0.4957 | -0.0108 | 0.0337  | 0.2144  | 0.2345  | 0.1755  | 0.3247  | -0.0839 |
| PY04936 | -0.3125 | -0.1517 | -0.1966 | -0.1517 | 0.2573  | -0.351  | -0.2413 | -0.1666 | -0.2251 | -0.0642 | 0.051   | 0.0812  |
| PY03717 | 0.8019  | 0.419   | 0.7312  | 0.3362  | -0.619  | 0.4723  | 0.9473  | 0.0345  | 0.5636  | 0.0832  | -0.9606 | 0.4505  |
| PY03666 | 0.5722  | 0.1676  | 0.436   | -0.1499 | -0.2004 | 0.0789  | 0.121   | -0.22   | 0.0096  | -0.1908 | -0.8023 | 0.317   |
| PY06970 | 0.1333  | 0.1321  | 0.2359  | 0.3464  | 0.0488  | 0.1414  | 0.0206  | -0.0383 | -0.1486 | 0.1113  | 0.3044  | -0.2116 |
| PY01506 | -0.2625 | -0.2348 | -0.1566 | -0.4223 | -0.0732 | -0.1017 | 0.0564  | -0.3412 | -0.0739 | -0.2302 | -0.1733 | 0.2848  |
| PY05491 | -0.6023 | -0.0944 | -0.2105 | -1.1416 | -0.3192 | 0.3448  | -0.0112 | 0.3467  | 0.1667  | -0.2946 | 0.1931  | -0.5273 |
| PY00132 | -1.0099 | -0.4267 | -0.191  | -0.1001 | -0.1468 | -0.1277 | -0.2576 | 0.1447  | 0.0063  | 0.5591  | 0.6026  | -0.0249 |
| PY03645 | 0.5607  | 0.4048  | 0.4382  | 0.0501  | 0.4243  | 0.4393  | 0.1317  | 0.0432  | -0.4859 | 0.0215  | 0.0149  | 0.009   |
| PY04248 | -0.0273 | 0.2264  | 0.1496  | -0.5033 | -0.0669 | -0.1869 | -0.1069 | -0.5932 | 0.0725  | -0.0728 | -0.2819 | 0.2994  |
| PY04562 | -0.3054 | -0.0283 | -0.2515 | 0.0584  | -0.45   | -0.4583 | -0.1452 | -0.1285 | 0.3518  | 0.4627  | 0.1682  | 0.1087  |
| PY05939 | 0.0603  | 0.21    | 0.2559  | -0.7611 | -0.4409 | -0.4002 | -0.1135 | -0.1064 | 0.1136  | -0.4338 | 0.0941  | -0.1641 |
| PY07659 | 0.2542  | 0.0041  | -0.0028 | 0.0507  | 0.2513  | 0.1406  | 0.0097  | -0.1594 | -0.0555 | -0.6736 | 0.1636  | 0.2419  |
| PY04993 | -0.6691 | -0.3223 | -0.2072 | -0.1972 | -0.1091 | -0.3285 | -0.2256 | -0.0402 | 0.019   | 0.4006  | 0.0621  | 0.0789  |

|         |         |         |         |         |         |         |         |         |         |         |         |         |
|---------|---------|---------|---------|---------|---------|---------|---------|---------|---------|---------|---------|---------|
| PY01215 | 0.2541  | -0.4156 | -0.103  | -0.3401 | 0.125   | -0.2939 | -0.4879 | -0.1126 | -0.3155 | -0.3038 | -0.2073 | 0.2188  |
| PY01708 | -0.3415 | -0.0379 | 0.2859  | 0.2271  | 0.3902  | 0.4816  | 0.3477  | 0.2201  | 0.0784  | 0.1345  | -0.0601 | 0.0652  |
| PY01125 | -0.3446 | -0.2454 | 0.2192  | -0.1959 | 0.2375  | 0.3392  | 0.5742  | 0.0281  | -0.3263 | 0.1477  | 0.2488  | -0.0203 |
| PY05379 | -0.4316 | 0.0934  | 0.2141  | -0.1136 | 0.4761  | 0.4267  | 0.3138  | 0.0377  | 0.2582  | 0.125   | 0.3936  | -0.0543 |
| PY07336 | -0.7356 | 0.025   | 0.4284  | 0.1956  | -0.5534 | -0.1428 | -0.4153 | -0.0584 | 0.0006  | 0.1866  | 0.1178  | 0.0377  |
| PY03308 | 0.2875  | 0.0439  | -0.2037 | -0.2158 | -0.2106 | -0.1053 | -0.0256 | -0.2243 | 0.0351  | -0.1316 | 0.0479  | 0.2332  |
| PY02162 | -0.0134 | 0.2294  | 0.3626  | 0.0667  | -0.1834 | 0.1182  | 0.3629  | 0.2862  | 0.5315  | 0.3323  | 0.1348  | 0.5737  |

**Supplementary Table 2: Adjusted phase Ph and Ds scores for 2312 syntenic orthologs present in all six *Plasmodium* species.**

Orthologs of species with the most divergent expression timing, or *Ph* are denoted as first outlier (outlier1) as highlighted in green. Ds5 was recalculated by removing the outlier1 *Ph* value. The second most divergent *Ph* is denoted as second outlier (outlier 2) as highlighted in yellow. Ds4 was recalculated by removing the outlier1 and outlier2 *Ph* value. The corresponding outlier species are listed next to each outlier *Ph* values.

| pf gene ID  | pk gene ID | pv gene ID | py gene ID | pb gene ID    | pc gene ID   | pf adj. phase | pk adj. phase | pv adj. phase | py adj. phase | pb adj. phase | pc adj. phase | Ds6     | Ds5 (exclude outlier1) | outlier1 adj. phase | outlier1 species | Ds4 (exclude outlier1 & 2) | outlier2 adj. phase | outlier2 species |
|-------------|------------|------------|------------|---------------|--------------|---------------|---------------|---------------|---------------|---------------|---------------|---------|------------------------|---------------------|------------------|----------------------------|---------------------|------------------|
| MAL13P1.103 | PKH_141860 | PVX_122785 | PY06278    | PBANKA_141790 | PCHAS_141970 | 4.37082       | 4.64303       | 4.88369       | 3.37733       | 5.05669       | 4.72439       | 0.37893 | 0.1853039              | 3.37733             | py               | 0.1485541                  | 5.056688            | pb               |
| MAL13P1.111 | PKH_141910 | PVX_122815 | PY03872    | PBANKA_141840 | PCHAS_142020 | 4.81838       | 3.60117       | 3.14525       | 5.00597       | 3.83505       | 4.10638       | 0.55821 | 0.4776233              | 3.14525             | pv               | 0.3721327                  | 5.005968            | py               |
| MAL13P1.113 | PKH_141950 | PVX_122835 | PY07140    | PBANKA_141880 | PCHAS_142060 | 2.9007        | 4.48103       | 5.69182       | 3.05548       | 3.66266       | 3.16912       | 0.78503 | 0.4375018              | 5.69182             | pv               | 0.5184662                  | 3.055478            | py               |
| MAL13P1.117 | PKH_142040 | PVX_122880 | PY03989    | PBANKA_141970 | PCHAS_142150 | 0.31904       | 5.72425       | 4.22804       | 5.96618       | 3.37402       | 4.66767       | 1.00382 | 0.7345374              | 3.37402             | pb               | 0.6540284                  | 4.667674            | pc               |
| MAL13P1.119 | PKH_142060 | PVX_122890 | PY01857    | PBANKA_141990 | PCHAS_142170 | 5.68447       | 0.20702       | 5.98052       | 4.97703       | 5.19905       | 0.27752       | 0.52848 | 0.4334765              | 4.97703             | py               | 0.346479                   | 5.199055            | pb               |
| MAL13P1.120 | PKH_123140 | PVX_116785 | PY05435    | PBANKA_133710 | PCHAS_134170 | 2.47651       | 2.4844        | 2.392         | 1.82411       | 2.59521       | 2.26848       | 0.17859 | 0.083826               | 1.82411             | py               | 0.0751071                  | 2.595214            | pb               |
| MAL13P1.121 | PKH_123110 | PVX_116770 | PY06466    | PBANKA_133740 | PCHAS_134200 | 4.44767       | 3.66503       | 4.04359       | 2.34059       | 2.59515       | 3.80836       | 0.61648 | 0.4462178              | 2.34059             | py               | 0.2544687                  | 2.595146            | pb               |
| MAL13P1.125 | PKH_123070 | PVX_116750 | PY00521    | PBANKA_133770 | PCHAS_134230 | 2.41602       | 1.08964       | 0.20176       | 5.99059       | 5.03241       | 2.3096        | 1.19281 | 0.9632908              | 5.03241             | pb               | 0.8991229                  | 2.309602            | pc               |
| MAL13P1.126 | PKH_123060 | PVX_116745 | PY00520    | PBANKA_133780 | PCHAS_134240 | 5.26778       | 4.72011       | 5.34279       | 5.43684       | 4.83573       | 4.87869       | 0.26881 | 0.2130418              | 4.72011             | pk               | 0.247548                   | 5.342793            | pv               |
| MAL13P1.130 | PKH_122940 | PVX_116685 | PY04760    | PBANKA_133890 | PCHAS_134350 | 5.52993       | 6.22829       | 5.81          | 5.48607       | 5.6009        | 5.36333       | 0.20998 | 0.1122999              | 6.22829             | pk               | 0.0703563                  | 5.810001            | pv               |
| MAL13P1.131 | PKH_122900 | PVX_116665 | PY01637    | PBANKA_133930 | PCHAS_134390 | 4.47372       | 5.28862       | 4.67272       | 4.41938       | 1.52754       | 5.13036       | 0.77731 | 0.3051773              | 1.52754             | pb               | 0.267063                   | 5.130357            | pc               |
| MAL13P1.132 | PKH_122890 | PVX_116660 | PY01638    | PBANKA_133940 | PCHAS_134400 | 2.41028       | 1.88762       | 1.94341       | 2.26945       | 3.57709       | 2.70685       | 0.43229 | 0.2572212              | 3.57709             | pb               | 0.2121763                  | 2.706852            | pc               |
| MAL13P1.135 | PKH_122840 | PVX_116640 | PY03887    | PBANKA_133990 | PCHAS_134450 | 0.19093       | 3.38272       | 3.91215       | 4.97149       | 3.08022       | 0.26293       | 1.26944 | 0.9965328              | 0.26293             | pc               | 0.605174                   | 0.190934            | pf               |
| MAL13P1.138 | PKH_122760 | PVX_116605 | PY02025    | PBANKA_134060 | PCHAS_134520 | 3.4442        | 2.1601        | 0.2884        | 4.55037       | 0.26024       | 2.14681       | 1.2432  | 1.1558973              | 3.4442              | pf               | 0.9769476                  | 2.160099            | pk               |
| MAL13P1.139 | PKH_122750 | PVX_116600 | PY02026    | PBANKA_134070 | PCHAS_134530 | 5.0675        | 4.33064       | 4.397         | 1.15526       | 5.65572       | 5.206         | 0.75084 | 0.4268174              | 1.15526             | py               | 0.3864665                  | 5.655716            | pb               |
| MAL13P1.14  | PKH_140120 | PVX_121975 | PY00742    | PBANKA_140120 | PCHAS_140310 | 1.401         | 0.96193       | 2.08701       | 1.18984       | 0.95384       | 1.80313       | 0.36426 | 0.257671               | 2.08701             | pv               | 0.3220887                  | 1.189838            | py               |
| MAL13P1.141 | PKH_122700 | PVX_116580 | PY02849    | PBANKA_134110 | PCHAS_134570 | 5.02029       | 5.24502       | 4.88707       | 5.47247       | 4.68954       | 5.96877       | 0.34822 | 0.2281737              | 5.96877             | pc               | 0.2025302                  | 4.689545            | pb               |



|               |            |            |         |                   |                  |         |         |         |         |         |         |         |           |         |    |           |          |    |
|---------------|------------|------------|---------|-------------------|------------------|---------|---------|---------|---------|---------|---------|---------|-----------|---------|----|-----------|----------|----|
| MAL13P1.146   | PKH_122330 | PVX_082415 | PY01044 | PBANKA_134<br>440 | PCHAS_13490<br>0 | 2.52356 | 3.70038 | 5.0148  | 5.42126 | 5.76655 | 5.07461 | 0.83728 | 0.494526  | 2.52356 | pf | 0.2746022 | 3.700384 | pk |
| MAL13P1.150   | PKH_122420 | PVX_082370 | PY01552 | PBANKA_134<br>360 | PCHAS_13482<br>0 | 2.61732 | 2.26236 | 2.12931 | 2.54733 | 1.83901 | 1.97377 | 0.24749 | 0.2123155 | 1.83901 | pb | 0.1932462 | 1.973767 | pc |
| MAL13P1.151   | PKH_122500 | PVX_082350 | PY04447 | PBANKA_134<br>320 | PCHAS_13478<br>0 | 4.2665  | 5.36942 | 5.37614 | 1.39127 | 5.84244 | 4.72103 | 0.75601 | 0.4462095 | 1.39127 | py | 0.4395071 | 5.842441 | pb |
| MAL13P1.152   | PKH_122540 | PVX_116505 | PY07030 | PBANKA_134<br>270 | PCHAS_13473<br>0 | 5.2869  | 4.96919 | 5.07347 | 5.3876  | 5.8022  | 0.60875 | 0.4587  | 0.2294284 | 0.60875 | pc | 0.2073579 | 4.969187 | pk |
| MAL13P1.159   | PKH_122270 | PVX_082440 | PY04179 | PBANKA_134<br>500 | PCHAS_13496<br>0 | 2.62359 | 4.05776 | 2.44789 | 5.03497 | 3.49171 | 2.77112 | 0.7903  | 0.495596  | 5.03497 | py | 0.439348  | 3.49171  | pb |
| MAL13P1.16    | PKH_140170 | PVX_122000 | PY03903 | PBANKA_140<br>170 | PCHAS_14036<br>0 | 4.05921 | 2.90183 | 2.97706 | 4.31797 | 3.2797  | 3.36923 | 0.4313  | 0.3099096 | 4.31797 | py | 0.387387  | 3.279702 | pb |
| MAL13P1.160   | PKH_122260 | PVX_082445 | PY04180 | PBANKA_134<br>510 | PCHAS_13497<br>0 | 4.25181 | 3.75634 | 4.83551 | 4.63717 | 3.3641  | 3.42394 | 0.53002 | 0.4201876 | 4.83551 | pv | 0.3050271 | 4.637173 | py |
| MAL13P1.163-a | PKH_122230 | PVX_082460 | PY06403 | PBANKA_134<br>540 | PCHAS_13500<br>0 | 5.45426 | 4.07415 | 4.01007 | 3.12981 | 4.26636 | 4.85299 | 0.55993 | 0.4446054 | 3.12981 | py | 0.5557567 | 4.266365 | pb |
| MAL13P1.164   | PKH_122210 | PVX_082470 | PY06134 | PBANKA_134<br>560 | PCHAS_13502<br>0 | 3.8768  | 2.88354 | 3.06203 | 2.60454 | 2.80966 | 2.78751 | 0.27011 | 0.1107029 | 3.8768  | pf | 0.119907  | 2.883542 | pk |
| MAL13P1.167   | PKH_122150 | PVX_082500 | PY00480 | PBANKA_134<br>620 | PCHAS_13508<br>0 | 4.44897 | 3.7776  | 4.08642 | 5.44856 | 3.5999  | 0.88012 | 0.93282 | 0.5040069 | 0.88012 | pc | 0.2894736 | 5.448555 | py |
| MAL13P1.170   | PKH_122050 | PVX_082550 | PY05727 | PBANKA_134<br>720 | PCHAS_13518<br>0 | 1.84451 | 0.62888 | 2.7776  | 2.22989 | 3.77721 | 0.90631 | 0.90083 | 0.6944609 | 3.77721 | pb | 0.6335254 | 0.906308 | pc |
| MAL13P1.171   | PKH_121960 | PVX_082595 | PY06414 | PBANKA_134<br>800 | PCHAS_13526<br>0 | 2.29963 | 4.88525 | 4.61857 | 5.01229 | 2.87707 | 4.45966 | 0.81329 | 0.512162  | 2.29963 | pf | 0.5735311 | 4.885252 | pk |
| MAL13P1.178   | PKH_121800 | PVX_082720 | PY03049 | PBANKA_134<br>950 | PCHAS_13541<br>0 | 1.54848 | 0.60597 | 3.22561 | 6.18678 | 1.87924 | 0.07451 | 1.01154 | 0.6899226 | 3.22561 | pv | 0.6868099 | 6.186778 | py |
| MAL13P1.179   | PKH_121760 | PVX_082740 | PY01509 | PBANKA_134<br>990 | PCHAS_13545<br>0 | 1.0993  | 4.35593 | 0.34664 | 3.19923 | 3.64037 | 2.59434 | 1.19254 | 0.8605325 | 0.34664 | pv | 1.0756656 | 3.199234 | py |
| MAL13P1.18    | PKH_140220 | PVX_122025 | PY01944 | PBANKA_140<br>220 | PCHAS_14041<br>0 | 5.34787 | 5.52734 | 4.76211 | 2.96705 | 2.38578 | 2.45049 | 1.30567 | 1.0547417 | 5.52734 | pk | 0.8696625 | 4.762108 | pv |
| MAL13P1.180   | PKH_121740 | PVX_082745 | PY01506 | PBANKA_135<br>010 | PCHAS_13547<br>0 | 3.88884 | 3.11461 | 3.87157 | 0.15192 | 3.5387  | 1.6811  | 0.97685 | 0.5929397 | 0.15192 | py | 0.7411746 | 3.538703 | pb |
| MAL13P1.185   | PKH_121660 | PVX_082785 | PY04971 | PBANKA_135<br>090 | PCHAS_13555<br>0 | 3.02395 | 2.4047  | 2.1177  | 4.9737  | 3.66751 | 2.40712 | 0.78927 | 0.4338113 | 4.9737  | py | 0.2271673 | 3.667507 | pb |
| MAL13P1.186   | PKH_121650 | PVX_082790 | PY04970 | PBANKA_135<br>100 | PCHAS_13556<br>0 | 2.76235 | 2.32041 | 2.87816 | 2.71723 | 2.19687 | 2.15183 | 0.28144 | 0.2261754 | 2.87816 | pv | 0.183514  | 2.717228 | py |
| MAL13P1.188   | PKH_121610 | PVX_082815 | PY02108 | PBANKA_135<br>140 | PCHAS_13560<br>0 | 5.67754 | 5.84857 | 5.88096 | 4.71231 | 6.03163 | 5.53766 | 0.30561 | 0.1394785 | 4.71231 | py | 0.1285826 | 6.031629 | pb |
| MAL13P1.189   | PKH_121580 | PVX_082830 | PY02720 | PBANKA_135<br>170 | PCHAS_13563<br>0 | 4.98722 | 4.27045 | 4.83729 | 0.571   | 4.99037 | 5.1204  | 0.47833 | 0.2006078 | 0.571   | py | 0.2499723 | 4.990371 | pb |
| MAL13P1.19    | PKH_140230 | PVX_122030 | PY01943 | PBANKA_140<br>230 | PCHAS_14042<br>0 | 3.96575 | 4.69048 | 4.92412 | 3.09647 | 4.54907 | 3.90386 | 0.53293 | 0.3489989 | 3.09647 | py | 0.4362487 | 4.549074 | pb |
| MAL13P1.190   | PKH_121570 | PVX_082835 | PY02721 | PBANKA_135<br>180 | PCHAS_13564<br>0 | 3.78056 | 3.53566 | 3.36867 | 2.63032 | 3.35423 | 3.7746  | 0.2896  | 0.166451  | 2.63032 | py | 0.1627078 | 3.354234 | pb |

|             |            |            |         |                   |                  |         |         |         |         |         |         |         |           |         |    |           |          |    |
|-------------|------------|------------|---------|-------------------|------------------|---------|---------|---------|---------|---------|---------|---------|-----------|---------|----|-----------|----------|----|
| MAL13P1.191 | PKH_121540 | PVX_082850 | PY07119 | PBANKA_135<br>210 | PCHAS_13567<br>0 | 4.98526 | 2.6703  | 0.43821 | 3.17423 | 5.53147 | 4.22651 | 1.19452 | 0.9344414 | 0.43821 | pv | 0.9049828 | 3.174234 | py |
| MAL13P1.192 | PKH_121530 | PVX_082855 | PY07118 | PBANKA_135<br>220 | PCHAS_13568<br>0 | 3.65012 | 3.64918 | 2.92505 | 2.9686  | 2.39793 | 0.95307 | 0.66531 | 0.3952644 | 0.95307 | pc | 0.3237009 | 3.650119 | pf |
| MAL13P1.193 | PKH_121520 | PVX_082860 | PY07117 | PBANKA_135<br>230 | PCHAS_13569<br>0 | 3.87295 | 3.77131 | 3.14987 | 2.22198 | 3.45983 | 3.50299 | 0.38593 | 0.206911  | 2.22198 | py | 0.2478483 | 3.459832 | pb |
| MAL13P1.194 | PKH_121510 | PVX_082865 | PY07116 | PBANKA_135<br>240 | PCHAS_13570<br>0 | 4.36017 | 5.94747 | 5.76361 | 5.053   | 5.23049 | 5.24679 | 0.3857  | 0.285518  | 4.36017 | pf | 0.1817278 | 5.947468 | pk |
| MAL13P1.196 | PKH_121490 | PVX_082880 | PY06928 | PBANKA_135<br>260 | PCHAS_13572<br>0 | 4.48118 | 6.08097 | 3.61392 | 4.47205 | 3.13241 | 2.11131 | 1.02943 | 0.7419038 | 6.08097 | pk | 0.9273797 | 3.613916 | pv |
| MAL13P1.202 | PKH_121440 | PVX_082905 | PY00593 | PBANKA_135<br>310 | PCHAS_13577<br>0 | 4.53757 | 5.32668 | 5.24702 | 0.07124 | 5.39637 | 1.23076 | 0.69224 | 0.3932404 | 1.23076 | pc | 0.2942727 | 4.537569 | pf |
| MAL13P1.204 | PKH_121400 | PVX_082925 | PY02553 | PBANKA_135<br>350 | PCHAS_13581<br>0 | 1.87577 | 3.41382 | 2.93358 | 2.40076 | 2.59156 | 1.72647 | 0.48933 | 0.3845819 | 3.41382 | pk | 0.3475212 | 2.933581 | pv |
| MAL13P1.205 | PKH_121350 | PVX_082950 | PY02876 | PBANKA_135<br>410 | PCHAS_13587<br>0 | 4.34659 | 5.28893 | 5.73148 | 5.11169 | 5.14688 | 5.31111 | 0.28773 | 0.1568058 | 4.34659 | pf | 0.1960073 | 5.288929 | pk |
| MAL13P1.206 | PKH_121330 | PVX_082960 | PY01393 | PBANKA_135<br>430 | PCHAS_13589<br>0 | 0.02366 | 2.88478 | 1.398   | 0.75591 | 1.52038 | 0.68718 | 0.72274 | 0.4415094 | 2.88478 | pk | 0.3913641 | 1.397999 | pv |
| MAL13P1.209 | PKH_121310 | PVX_082970 | PY01390 | PBANKA_135<br>450 | PCHAS_13591<br>0 | 2.45785 | 2.05679 | 2.53585 | 1.15822 | 2.19771 | 2.33154 | 0.31875 | 0.1478405 | 1.15822 | py | 0.151344  | 2.197711 | pb |
| MAL13P1.21  | PKH_140250 | PVX_122040 | PY01534 | PBANKA_140<br>250 | PCHAS_14044<br>0 | 4.53249 | 5.05426 | 0.50159 | 3.93404 | 5.31316 | 4.8374  | 0.64138 | 0.3801792 | 0.50159 | pv | 0.2493839 | 3.934039 | py |
| MAL13P1.210 | PKH_121290 | PVX_082980 | PY01388 | PBANKA_135<br>470 | PCHAS_13593<br>0 | 3.84271 | 4.73329 | 2.27167 | 5.89752 | 4.2153  | 4.72209 | 0.8372  | 0.5145599 | 2.27167 | pv | 0.349341  | 5.897524 | py |
| MAL13P1.215 | PKH_121140 | PVX_083050 | PY05491 | PBANKA_135<br>610 | PCHAS_13607<br>0 | 4.95724 | 5.14921 | 5.09786 | 5.35417 | 6.17732 | 5.33828 | 0.27758 | 0.127471  | 6.17732 | pb | 0.1120717 | 5.338282 | pc |
| MAL13P1.216 | PKH_121110 | PVX_083065 | PY02949 | PBANKA_135<br>640 | PCHAS_13610<br>0 | 0.97182 | 4.8627  | 4.81506 | 2.41178 | 4.88777 | 2.23717 | 1.25691 | 1.0203041 | 0.97182 | pf | 1.2634704 | 4.862703 | pk |
| MAL13P1.217 | PKH_121100 | PVX_083070 | PY02948 | PBANKA_135<br>650 | PCHAS_13611<br>0 | 4.2807  | 3.85617 | 3.44124 | 3.66494 | 4.19557 | 3.81299 | 0.23554 | 0.1996666 | 3.44124 | pv | 0.2017767 | 3.664944 | py |
| MAL13P1.219 | PKH_120990 | PVX_083120 | PY06207 | PBANKA_135<br>740 | PCHAS_13620<br>0 | 5.05414 | 3.26803 | 3.17781 | 6.08082 | 3.47938 | 2.96052 | 0.868   | 0.4790392 | 6.08082 | py | 0.54596   | 3.479383 | pb |
| MAL13P1.22  | PKH_140260 | PVX_122045 | PY01533 | PBANKA_140<br>260 | PCHAS_14045<br>0 | 4.87743 | 3.84442 | 5.14777 | 2.39855 | 0.0246  | 4.28715 | 0.96715 | 0.6647987 | 2.39855 | py | 0.473409  | 0.024603 | pb |
| MAL13P1.220 | PKH_120980 | PVX_083125 | PY06208 | PBANKA_135<br>750 | PCHAS_13621<br>0 | 5.10421 | 3.88449 | 2.66508 | 5.21175 | 2.78906 | 2.943   | 0.96722 | 0.7069126 | 5.21175 | py | 0.8451554 | 2.789062 | pb |
| MAL13P1.221 | PKH_120960 | PVX_083135 | PY06210 | PBANKA_135<br>770 | PCHAS_13623<br>0 | 2.4958  | 2.75383 | 1.85173 | 5.11093 | 4.24504 | 5.2686  | 1.25387 | 1.0259817 | 1.85173 | pv | 1.0660034 | 5.110934 | py |
| MAL13P1.224 | PKH_120940 | PVX_083150 | PY00585 | PBANKA_135<br>790 | PCHAS_13625<br>0 | 1.29055 | 3.87705 | 0.49646 | 5.68391 | 0.67607 | 2.09356 | 1.09486 | 0.6973851 | 3.87705 | pk | 0.8268286 | 0.496462 | pv |
| MAL13P1.226 | PKH_120900 | PVX_083170 | PY00589 | PBANKA_135<br>830 | PCHAS_13629<br>0 | 4.16406 | 4.50483 | 5.31568 | 1.73513 | 4.80335 | 4.43782 | 0.71448 | 0.3034312 | 1.73513 | py | 0.3046577 | 4.803355 | pb |
| MAL13P1.227 | PKH_120890 | PVX_083175 | PY00590 | PBANKA_135<br>840 | PCHAS_13630<br>0 | 3.96526 | 3.93909 | 3.26099 | 4.97176 | 3.648   | 4.02992 | 0.35314 | 0.2172381 | 4.97176 | py | 0.1987742 | 3.648    | pb |

|             |            |            |         |                   |                  |         |         |         |         |         |         |         |           |         |    |           |          |    |
|-------------|------------|------------|---------|-------------------|------------------|---------|---------|---------|---------|---------|---------|---------|-----------|---------|----|-----------|----------|----|
| MAL13P1.229 | PKH_120850 | PVX_083195 | PY02508 | PBANKA_135<br>880 | PCHAS_13634<br>0 | 4.18178 | 5.07143 | 4.69151 | 4.25896 | 4.38459 | 5.19978 | 0.35623 | 0.264438  | 5.19978 | pc | 0.1588387 | 5.071426 | pk |
| MAL13P1.231 | PKH_120830 | PVX_083205 | PY02510 | PBANKA_135<br>900 | PCHAS_13636<br>0 | 3.16905 | 0.16348 | 3.95501 | 3.05573 | 3.47554 | 3.91019 | 0.76859 | 0.3280827 | 0.16348 | pk | 0.2902378 | 3.955006 | pv |
| MAL13P1.232 | PKH_120820 | PVX_083210 | PY02511 | PBANKA_135<br>910 | PCHAS_13637<br>0 | 2.01795 | 3.25524 | 2.31068 | 1.33309 | 2.42882 | 1.2187  | 0.57083 | 0.4375397 | 3.25524 | pk | 0.4737432 | 2.310677 | pv |
| MAL13P1.233 | PKH_120790 | PVX_083215 | PY01330 | PBANKA_135<br>920 | PCHAS_13638<br>0 | 1.8238  | 0.56434 | 1.38234 | 2.64976 | 2.06557 | 1.29296 | 0.54991 | 0.4080052 | 0.56434 | pk | 0.3996429 | 1.382342 | pv |
| MAL13P1.234 | PKH_120780 | PVX_083220 | PY01329 | PBANKA_135<br>930 | PCHAS_13639<br>0 | 4.75355 | 4.10994 | 3.36327 | 2.94021 | 2.79521 | 2.15875 | 0.7221  | 0.5038513 | 4.75355 | pf | 0.3373835 | 4.109936 | pk |
| MAL13P1.237 | PKH_120640 | PVX_083270 | PY07482 | PBANKA_136<br>030 | PCHAS_13649<br>0 | 1.82472 | 2.27495 | 1.57561 | 2.652   | 2.78305 | 2.90671 | 0.44441 | 0.3180185 | 1.57561 | pv | 0.3975231 | 2.651998 | py |
| MAL13P1.239 | PKH_120600 | PVX_083290 | PY06076 | PBANKA_136<br>070 | PCHAS_13653<br>0 | 3.89277 | 2.15119 | 2.9046  | 5.92327 | 5.90128 | 1.32464 | 1.39429 | 1.1595217 | 3.89277 | pf | 1.1813048 | 2.151188 | pk |
| MAL13P1.24  | PKH_140280 | PVX_122055 | PY07311 | PBANKA_140<br>280 | PCHAS_14047<br>0 | 0.3607  | 2.67945 | 2.42138 | 5.44103 | 3.39018 | 3.37405 | 1.12395 | 0.7460751 | 0.3607  | pf | 0.7589452 | 2.679454 | pk |
| MAL13P1.241 | PKH_120580 | PVX_083300 | PY02624 | PBANKA_136<br>090 | PCHAS_13655<br>0 | 5.28083 | 4.84139 | 5.4763  | 4.33856 | 5.34222 | 4.63496 | 0.38074 | 0.2684344 | 4.33856 | py | 0.3201945 | 5.342221 | pb |
| MAL13P1.242 | PKH_120570 | PVX_083305 | PY02626 | PBANKA_136<br>100 | PCHAS_13656<br>0 | 1.09408 | 5.95159 | 0.12307 | 4.18058 | 5.88426 | 5.96951 | 0.62277 | 0.3895346 | 4.18058 | py | 0.4656058 | 5.88426  | pb |
| MAL13P1.243 | PKH_120560 | PVX_083310 | PY02627 | PBANKA_136<br>110 | PCHAS_13657<br>0 | 1.88372 | 3.50848 | 4.12496 | 2.37962 | 2.10344 | 2.4967  | 0.62723 | 0.4036043 | 4.12496 | pv | 0.5045054 | 2.379619 | py |
| MAL13P1.244 | PKH_120540 | PVX_083320 | PY05115 | PBANKA_136<br>130 | PCHAS_13659<br>0 | 4.13064 | 4.15202 | 3.20628 | 5.08078 | 3.36405 | 2.05572 | 0.78957 | 0.5324937 | 2.05572 | pc | 0.4280833 | 5.08078  | py |
| MAL13P1.248 | PKH_120480 | PVX_083350 | PY02890 | PBANKA_136<br>190 | PCHAS_13665<br>0 | 5.47271 | 2.99488 | 1.19974 | 4.17294 | 3.89828 | 1.66286 | 1.28107 | 0.9975802 | 1.19974 | pv | 1.178309  | 4.172942 | py |
| MAL13P1.250 | PKH_120430 | PVX_083375 | PY00112 | PBANKA_136<br>240 | PCHAS_13670<br>0 | 4.35466 | 5.02795 | 4.50914 | 4.47395 | 4.75594 | 4.77608 | 0.2037  | 0.1406796 | 5.02795 | pk | 0.1758496 | 4.509136 | pv |
| MAL13P1.253 | PKH_120370 | PVX_083405 | PY05604 | PBANKA_136<br>300 | PCHAS_13676<br>0 | 2.35197 | 2.68577 | 1.84839 | 1.09445 | 1.49214 | 4.02912 | 0.77198 | 0.4902314 | 4.02912 | pc | 0.4243036 | 1.094447 | py |
| MAL13P1.255 | PKH_120320 | PVX_083430 | PY06977 | PBANKA_136<br>350 | PCHAS_13681<br>0 | 3.32905 | 3.21245 | 2.57033 | 4.79186 | 3.52099 | 2.30181 | 0.59289 | 0.3955815 | 4.79186 | py | 0.4173407 | 3.520994 | pb |
| MAL13P1.26  | PKH_140380 | PVX_122100 | PY02189 | PBANKA_140<br>380 | PCHAS_14057<br>0 | 2.26632 | 3.10008 | 2.41023 | 2.46844 | 2.2635  | 2.23564 | 0.20221 | 0.0759051 | 3.10008 | pk | 0.0589041 | 2.410227 | pv |
| MAL13P1.260 | PKH_120230 | PVX_083475 | PY03838 | PBANKA_136<br>440 | PCHAS_13690<br>0 | 6.03204 | 0.04406 | 5.65296 | 5.1199  | 5.9757  | 6.03656 | 0.27455 | 0.1470303 | 5.1199  | py | 0.1697007 | 5.975695 | pb |
| MAL13P1.262 | PKH_120200 | PVX_083490 | PY07173 | PBANKA_136<br>470 | PCHAS_13693<br>0 | 3.30536 | 4.1577  | 4.11229 | 2.21597 | 2.759   | 2.31671 | 0.71394 | 0.5769932 | 4.1577  | pk | 0.3829171 | 4.112294 | pv |
| MAL13P1.270 | PKH_111720 | PVX_114685 | PY02351 | PBANKA_113<br>050 | PCHAS_11300<br>0 | 3.31216 | 3.69699 | 3.23101 | 3.24385 | 3.24507 | 3.32673 | 0.10266 | 0.0328055 | 3.69699 | pk | 0.0374904 | 3.231008 | pv |
| MAL13P1.271 | PKH_111680 | PVX_114705 | PY05899 | PBANKA_113<br>100 | PCHAS_11305<br>0 | 0.94225 | 3.55015 | 4.11445 | 0.20345 | 3.50855 | 1.47523 | 1.37087 | 1.0494243 | 0.20345 | py | 1.3117803 | 3.508546 | pb |
| MAL13P1.272 | PKH_111660 | PVX_114715 | PY03302 | PBANKA_113<br>120 | PCHAS_11307<br>0 | 1.63912 | 2.05951 | 1.97034 | 1.97999 | 0.69316 | 1.15062 | 0.42116 | 0.249951  | 0.69316 | pb | 0.1075091 | 1.15062  | pc |

|             |            |            |         |                   |                  |         |         |         |         |         |         |         |           |         |    |           |          |    |
|-------------|------------|------------|---------|-------------------|------------------|---------|---------|---------|---------|---------|---------|---------|-----------|---------|----|-----------|----------|----|
| MAL13P1.278 | PKH_111420 | PVX_114820 | PY02340 | PBANKA_113<br>310 | PCHAS_11326<br>0 | 5.86827 | 5.8863  | 5.99518 | 0.12945 | 6.24971 | 6.06774 | 0.16339 | 0.1125754 | 0.12945 | py | 0.0770866 | 6.249712 | pb |
| MAL13P1.279 | PKH_111410 | PVX_114825 | PY02339 | PBANKA_113<br>320 | PCHAS_11327<br>0 | 3.98635 | 4.7727  | 5.51589 | 5.45322 | 4.04239 | 3.73875 | 0.66239 | 0.5001654 | 5.51589 | pv | 0.2724995 | 5.453223 | py |
| MAL13P1.28  | PKH_140390 | PVX_122105 | PY00560 | PBANKA_140<br>390 | PCHAS_14058<br>0 | 2.2218  | 2.96824 | 2.80089 | 3.57736 | 2.62352 | 2.90347 | 0.30048 | 0.205278  | 3.57736 | py | 0.2122534 | 2.623516 | pb |
| MAL13P1.281 | PKH_111380 | PVX_114835 | PY00363 | PBANKA_113<br>350 | PCHAS_11330<br>0 | 3.38955 | 3.54515 | 3.76647 | 3.70793 | 3.46907 | 2.46798 | 0.28216 | 0.1231564 | 2.46798 | pc | 0.0986135 | 3.766474 | pv |
| MAL13P1.282 | PKH_111340 | PVX_114855 | PY05883 | PBANKA_113<br>390 | PCHAS_11334<br>0 | 3.42665 | 2.80565 | 5.93415 | 5.77425 | 3.08415 | 2.48501 | 1.12671 | 0.7820485 | 5.93415 | pv | 0.3050355 | 5.774255 | py |
| MAL13P1.284 | PKH_111310 | PVX_114870 | PY02938 | PBANKA_113<br>420 | PCHAS_11337<br>0 | 2.60446 | 1.92591 | 2.08037 | 5.16144 | 2.99172 | 1.73056 | 0.83679 | 0.3879406 | 5.16144 | py | 0.2570899 | 2.991718 | pb |
| MAL13P1.29  | PKH_140450 | PVX_122135 | PY04953 | PBANKA_140<br>450 | PCHAS_14064<br>0 | 5.23708 | 5.37002 | 4.54118 | 5.10305 | 4.94006 | 5.21936 | 0.20703 | 0.1127973 | 4.54118 | pv | 0.1119193 | 5.103051 | py |
| MAL13P1.292 | PKH_111170 | PVX_114925 | PY00264 | PBANKA_113<br>540 | PCHAS_11349<br>0 | 1.64717 | 2.03378 | 1.83424 | 2.02542 | 1.81924 | 1.93993 | 0.11641 | 0.0811443 | 1.64717 | pf | 0.0779674 | 2.033784 | pk |
| MAL13P1.298 | PKH_111090 | PVX_114965 | PY00945 | PBANKA_113<br>610 | PCHAS_11356<br>0 | 0.26772 | 4.6633  | 3.07569 | 1.54821 | 3.29594 | 4.86415 | 1.32196 | 0.9807107 | 0.26772 | pf | 0.8840483 | 4.663298 | pk |
| MAL13P1.300 | PKH_111050 | PVX_114980 | PY00949 | PBANKA_113<br>650 | PCHAS_11360<br>0 | 2.84613 | 4.53322 | 2.67877 | 4.24377 | 3.28623 | 3.4029  | 0.56146 | 0.4243548 | 4.53322 | pk | 0.3785787 | 2.678772 | pv |
| MAL13P1.304 | PKH_110950 | PVX_115020 | PY01093 | PBANKA_113<br>730 | PCHAS_11368<br>0 | 1.46722 | 4.47816 | 4.7932  | 2.44681 | 2.94392 | 1.51135 | 1.13165 | 0.8887015 | 4.7932  | pv | 1.1108769 | 2.446809 | py |
| MAL13P1.307 | PKH_110910 | PVX_115040 | PY01090 | PBANKA_113<br>760 | PCHAS_11371<br>0 | 4.66725 | 2.12977 | 0.48129 | 3.74296 | 4.72126 | 0.33562 | 1.26076 | 0.9946126 | 2.12977 | pk | 0.7324631 | 0.481287 | pv |
| MAL13P1.308 | PKH_110890 | PVX_115050 | PY01759 | PBANKA_113<br>780 | PCHAS_11373<br>0 | 5.73049 | 6.26843 | 5.5902  | 3.81496 | 3.89569 | 3.96267 | 0.98596 | 0.7220059 | 6.26843 | pk | 0.4956255 | 5.590202 | pv |
| MAL13P1.31  | PKH_140480 | PVX_122150 | PY02588 | PBANKA_140<br>480 | PCHAS_14067<br>0 | 3.34353 | 2.54739 | 4.36625 | 0.31773 | 2.68073 | 2.58854 | 0.82281 | 0.51477   | 0.31773 | py | 0.6434625 | 2.680731 | pb |
| MAL13P1.310 | PKH_110830 | PVX_115075 | PY00976 | PBANKA_113<br>840 | PCHAS_11379<br>0 | 0.73154 | 1.17173 | 0.96186 | 1.83704 | 4.81804 | 1.75684 | 0.75623 | 0.3800963 | 4.81804 | pb | 0.3288416 | 1.756843 | pc |
| MAL13P1.311 | PKH_110820 | PVX_115080 | PY00977 | PBANKA_113<br>850 | PCHAS_11380<br>0 | 4.42213 | 3.08609 | 3.45771 | 0.3823  | 0.57858 | 1.68032 | 1.38745 | 1.1165839 | 4.42213 | pf | 1.0442886 | 3.086089 | pk |
| MAL13P1.312 | PKH_110810 | PVX_115085 | PY00978 | PBANKA_113<br>860 | PCHAS_11381<br>0 | 0.15571 | 2.80017 | 0.52676 | 0.58682 | 0.60509 | 3.74923 | 0.97393 | 0.5445576 | 3.74923 | pc | 0.1273611 | 2.800167 | pk |
| MAL13P1.317 | PKH_110770 | PVX_115105 | PY04590 | PBANKA_113<br>900 | PCHAS_11385<br>0 | 1.38081 | 2.87838 | 2.71085 | 3.97952 | 2.93531 | 1.39917 | 0.71706 | 0.6067428 | 3.97952 | py | 0.7023136 | 2.935311 | pb |
| MAL13P1.318 | PKH_110740 | PVX_115120 | PY05802 | PBANKA_113<br>930 | PCHAS_11388<br>0 | 2.35368 | 2.99071 | 3.14006 | 4.54736 | 3.17745 | 3.21762 | 0.40967 | 0.2101372 | 4.54736 | py | 0.2533223 | 3.177452 | pb |
| MAL13P1.319 | PKH_110700 | PVX_115140 | PY00839 | PBANKA_113<br>970 | PCHAS_11392<br>0 | 3.85405 | 3.41925 | 3.13063 | 2.70268 | 3.36513 | 2.65909 | 0.35767 | 0.2845215 | 3.85405 | pf | 0.2834952 | 3.419254 | pk |
| MAL13P1.32  | PKH_140500 | PVX_122160 | PY02591 | PBANKA_140<br>500 | PCHAS_14069<br>0 | 1.23783 | 0.82407 | 5.84121 | 1.29689 | 0.31029 | 6.03467 | 0.62316 | 0.4945881 | 5.84121 | pv | 0.5000302 | 1.296885 | py |
| MAL13P1.321 | PKH_110670 | PVX_115160 | PY00838 | PBANKA_114<br>000 | PCHAS_11395<br>0 | 0.62887 | 6.2594  | 3.44174 | 5.02308 | 0.72239 | 5.64143 | 1.0118  | 0.6506224 | 3.44174 | pv | 0.5041988 | 5.023085 | py |

|             |            |            |         |                   |                  |         |         |         |         |         |         |         |           |         |    |           |          |    |
|-------------|------------|------------|---------|-------------------|------------------|---------|---------|---------|---------|---------|---------|---------|-----------|---------|----|-----------|----------|----|
| MAL13P1.322 | PKH_110640 | PVX_115175 | PY00835 | PBANKA_114<br>020 | PCHAS_11397<br>0 | 1.33346 | 0.4875  | 1.82612 | 2.22431 | 4.97291 | 1.60978 | 0.85826 | 0.4458937 | 4.97291 | pb | 0.5573672 | 1.609785 | pc |
| MAL13P1.323 | PKH_110630 | PVX_115180 | PY00834 | PBANKA_114<br>030 | PCHAS_11398<br>0 | 2.12546 | 1.76683 | 1.94948 | 2.10806 | 1.69164 | 1.46956 | 0.20916 | 0.155011  | 1.46956 | pc | 0.1497693 | 2.125461 | pf |
| MAL13P1.324 | PKH_110610 | PVX_115190 | PY02780 | PBANKA_114<br>050 | PCHAS_11400<br>0 | 4.27321 | 3.61224 | 4.62065 | 2.78038 | 3.88244 | 3.8804  | 0.41721 | 0.2802425 | 2.78038 | py | 0.3503031 | 3.882445 | pb |
| MAL13P1.326 | PKH_110580 | PVX_115205 | PY02777 | PBANKA_114<br>070 | PCHAS_11402<br>0 | 1.95501 | 3.69146 | 4.53588 | 2.79552 | 2.58113 | 3.43689 | 0.72209 | 0.518442  | 4.53588 | pv | 0.6480524 | 2.795522 | py |
| MAL13P1.327 | PKH_110560 | PVX_115215 | PY07362 | PBANKA_114<br>090 | PCHAS_11404<br>0 | 2.43884 | 3.2994  | 2.76279 | 2.8196  | 2.91925 | 3.48326 | 0.28011 | 0.2034053 | 3.48326 | pc | 0.1590648 | 2.438837 | pf |
| MAL13P1.329 | PKH_110500 | PVX_115245 | PY02843 | PBANKA_114<br>150 | PCHAS_11410<br>0 | 5.81571 | 5.89559 | 5.48567 | 5.59984 | 5.04209 | 5.72448 | 0.21803 | 0.1251569 | 5.04209 | pb | 0.1564461 | 5.724483 | pc |
| MAL13P1.33  | PKH_140520 | PVX_122170 | PY02593 | PBANKA_140<br>520 | PCHAS_14071<br>0 | 4.16244 | 1.28447 | 1.44965 | 2.69962 | 3.68783 | 5.15634 | 1.26215 | 1.0232301 | 5.15634 | pc | 0.9252491 | 1.284467 | pk |
| MAL13P1.330 | PKH_110490 | PVX_115250 | PY03339 | PBANKA_114<br>160 | PCHAS_11411<br>0 | 6.06993 | 5.87    | 1.12137 | 1.24391 | 4.74764 | 5.23425 | 0.85828 | 0.7654807 | 4.74764 | pb | 0.7479305 | 5.23425  | pc |
| MAL13P1.331 | PKH_110460 | PVX_115265 | PY05033 | PBANKA_114<br>190 | PCHAS_11414<br>0 | 6.1658  | 6.02602 | 0.12267 | 4.93725 | 5.65766 | 5.62578 | 0.39617 | 0.257645  | 4.93725 | py | 0.2299645 | 5.657656 | pb |
| MAL13P1.332 | PKH_110450 | PVX_115270 | PY05032 | PBANKA_114<br>200 | PCHAS_11415<br>0 | 3.97008 | 3.29581 | 3.28405 | 4.53552 | 2.93146 | 2.00017 | 0.59762 | 0.4580185 | 2.00017 | pc | 0.2625953 | 4.535521 | py |
| MAL13P1.335 | PKH_110380 | PVX_115300 | PY06104 | PBANKA_114<br>270 | PCHAS_11422<br>0 | 2.40165 | 0.57148 | 1.21036 | 5.63067 | 6.27185 | 4.91361 | 1.03615 | 0.7607838 | 2.40165 | pf | 0.8052776 | 0.571476 | pk |
| MAL13P1.336 | PKH_110370 | PVX_115305 | PY00082 | PBANKA_114<br>280 | PCHAS_11423<br>0 | 3.08239 | 2.83962 | 3.15788 | 2.12902 | 2.63518 | 2.71886 | 0.26614 | 0.1772438 | 2.12902 | py | 0.1704466 | 2.635184 | pb |
| MAL13P1.341 | PKH_110290 | PVX_115340 | PY03082 | PBANKA_114<br>350 | PCHAS_11430<br>0 | 1.78765 | 1.04761 | 2.0568  | 1.02934 | 0.71127 | 0.59202 | 0.42657 | 0.3063922 | 2.0568  | pv | 0.3829902 | 1.02934  | py |
| MAL13P1.343 | PKH_110240 | PVX_115365 | PY03078 | PBANKA_114<br>400 | PCHAS_11435<br>0 | 4.23401 | 4.71799 | 3.30983 | 2.83136 | 3.58582 | 4.0091  | 0.53902 | 0.4112705 | 2.83136 | py | 0.4082679 | 3.585817 | pb |
| MAL13P1.344 | PKH_110230 | PVX_115370 | PY04219 | PBANKA_114<br>410 | PCHAS_11436<br>0 | 2.63483 | 2.11185 | 2.81061 | 2.63892 | 2.61799 | 4.18081 | 0.37761 | 0.1439375 | 4.18081 | pc | 0.0491771 | 2.111854 | pk |
| MAL13P1.348 | PKH_110150 | PVX_115410 | PY04252 | PBANKA_114<br>490 | PCHAS_11444<br>0 | 5.22273 | 3.62396 | 4.01094 | 3.67553 | 4.1068  | 4.82219 | 0.47355 | 0.3259    | 5.22273 | pf | 0.3106293 | 3.623959 | pk |
| MAL13P1.349 | PKH_110130 | PVX_115420 | PY04540 | PBANKA_114<br>510 | PCHAS_11446<br>0 | 1.91207 | 3.49328 | 3.3702  | 2.51891 | 2.08676 | 1.99394 | 0.56494 | 0.3966202 | 3.49328 | pk | 0.1749142 | 3.370204 | pv |
| MAL13P1.350 | PKH_110120 | PVX_115425 | PY06441 | PBANKA_114<br>520 | PCHAS_11447<br>0 | 0.66008 | 3.82338 | 0.67161 | 5.40007 | 0.97628 | 0.42162 | 0.87154 | 0.4218769 | 3.82338 | pk | 0.524464  | 0.67161  | pv |
| MAL13P1.352 | PKH_110100 | PVX_115435 | PY00290 | PBANKA_114<br>550 | PCHAS_11450<br>0 | 2.15845 | 2.58315 | 2.13714 | 2.37593 | 1.24741 | 2.14628 | 0.26445 | 0.1351308 | 1.24741 | pb | 0.1658701 | 2.146279 | pc |
| MAL13P1.360 | PKH_122620 | PVX_116545 | PY01317 | PBANKA_134<br>190 | PCHAS_13465<br>0 | 0.85736 | 1.04703 | 5.45682 | 1.91693 | 1.37488 | 5.99026 | 0.7668  | 0.5454755 | 5.45682 | pv | 0.4643698 | 1.916931 | py |
| MAL13P1.365 | PKH_122610 | PVX_116540 | PY01316 | PBANKA_134<br>200 | PCHAS_13466<br>0 | 2.60562 | 0.83372 | 3.91607 | 4.34104 | 4.38075 | 1.04464 | 1.32713 | 1.0143031 | 0.83372 | pk | 1.1904798 | 3.916068 | pv |
| MAL13P1.37  | PKH_140680 | PVX_122225 | PY00030 | PBANKA_140<br>640 | PCHAS_14083<br>0 | 5.54702 | 5.94726 | 5.04365 | 3.48851 | 5.34301 | 5.54103 | 0.52669 | 0.2215231 | 3.48851 | py | 0.2273993 | 5.343013 | pb |

|             |            |            |         |                   |                  |         |         |         |         |         |         |         |           |         |    |           |          |    |
|-------------|------------|------------|---------|-------------------|------------------|---------|---------|---------|---------|---------|---------|---------|-----------|---------|----|-----------|----------|----|
| MAL13P1.38  | PKH_140690 | PVX_122230 | PY06255 | PBANKA_140<br>650 | PCHAS_14084<br>0 | 5.52925 | 6.0907  | 5.88775 | 5.53114 | 5.7658  | 5.2552  | 0.23811 | 0.1836104 | 5.2552  | pc | 0.1482884 | 6.090702 | pk |
| MAL13P1.380 | PKH_121070 | PVX_083085 | PY02945 | PBANKA_135<br>680 | PCHAS_13614<br>0 | 5.69096 | 5.28634 | 5.29621 | 4.93591 | 5.34485 | 5.73629 | 0.20894 | 0.1689407 | 4.93591 | py | 0.2111759 | 5.344854 | pb |
| MAL13P1.385 | PKH_121060 | PVX_083090 | PY05621 | PBANKA_135<br>690 | PCHAS_13615<br>0 | 1.58161 | 1.93972 | 2.86201 | 0.4828  | 3.80151 | 4.82684 | 1.2477  | 0.9198199 | 4.82684 | pc | 0.7855451 | 0.482803 | py |
| MAL13P1.390 | PKH_121050 | PVX_083095 | PY05620 | PBANKA_135<br>700 | PCHAS_13616<br>0 | 3.42483 | 2.77811 | 2.99517 | 1.8236  | 3.18234 | 2.34265 | 0.443   | 0.2972822 | 1.8236  | py | 0.3248109 | 3.182342 | pb |
| MAL13P1.43  | PKH_140790 | PVX_122280 | PY01749 | PBANKA_140<br>750 | PCHAS_14094<br>0 | 1.78428 | 0.63457 | 2.6605  | 2.06379 | 3.10447 | 1.32288 | 0.68117 | 0.5315632 | 0.63457 | pk | 0.5152759 | 2.660502 | pv |
| MAL13P1.44  | PKH_140810 | PVX_122290 | PY02322 | PBANKA_140<br>770 | PCHAS_14096<br>0 | 5.17431 | 1.34295 | 3.85671 | 2.39517 | 1.47397 | 5.7215  | 1.34224 | 1.094124  | 5.17431 | pf | 1.3348997 | 1.342952 | pk |
| MAL13P1.47  | PKH_140890 | PVX_122330 | PY03110 | PBANKA_140<br>850 | PCHAS_14104<br>0 | 4.0238  | 3.05876 | 4.39335 | 5.1265  | 3.42323 | 4.30395 | 0.553   | 0.4430617 | 5.1265  | py | 0.4036843 | 3.423227 | pb |
| MAL13P1.48  | PKH_140900 | PVX_122335 | PY05346 | PBANKA_140<br>860 | PCHAS_14105<br>0 | 3.00485 | 2.05124 | 4.32133 | 5.22164 | 2.76151 | 3.71859 | 0.90733 | 0.6454369 | 5.22164 | py | 0.7459617 | 2.761508 | pb |
| MAL13P1.49  | PKH_140910 | PVX_122340 | PY05347 | PBANKA_140<br>870 | PCHAS_14106<br>0 | 5.75361 | 6.06914 | 5.60863 | 5.29278 | 5.54806 | 3.32506 | 0.54425 | 0.1963822 | 3.32506 | pc | 0.1303485 | 6.069145 | pk |
| MAL13P1.51  | PKH_140950 | PVX_122360 | PY02796 | PBANKA_140<br>910 | PCHAS_14110<br>0 | 5.59118 | 3.11114 | 2.97268 | 5.43996 | 3.14769 | 2.26403 | 0.97183 | 0.6701887 | 5.59118 | pf | 0.8377359 | 3.111137 | pk |
| MAL13P1.52  | PKH_140970 | PVX_122370 | PY02799 | PBANKA_140<br>930 | PCHAS_14112<br>0 | 1.94246 | 1.62887 | 2.2168  | 2.39627 | 1.5819  | 1.82243 | 0.25372 | 0.1896971 | 2.39627 | py | 0.1769897 | 1.5819   | pb |
| MAL13P1.54  | PKH_141010 | PVX_122390 | PY02802 | PBANKA_140<br>970 | PCHAS_14116<br>0 | 2.41797 | 2.89185 | 2.39223 | 3.17684 | 6.18412 | 2.93521 | 0.71546 | 0.2603713 | 6.18412 | pb | 0.3146245 | 2.935213 | pc |
| MAL13P1.540 | PKH_121030 | PVX_083105 | PY05402 | PBANKA_135<br>720 | PCHAS_13618<br>0 | 3.16914 | 5.71169 | 4.48537 | 2.57527 | 2.92947 | 1.98678 | 0.97912 | 0.6184941 | 5.71169 | pk | 0.3841417 | 4.48537  | pv |
| MAL13P1.57  | PKH_141140 | PVX_122445 | PY02335 | PBANKA_141<br>070 | PCHAS_14126<br>0 | 1.66319 | 1.72147 | 3.37541 | 5.18398 | 3.32207 | 2.93608 | 0.92679 | 0.6625648 | 5.18398 | py | 0.7317083 | 3.322073 | pb |
| MAL13P1.63  | PKH_141200 | PVX_122470 | PY07184 | PBANKA_141<br>130 | PCHAS_14132<br>0 | 3.69934 | 1.25163 | 5.85007 | 2.3118  | 2.56955 | 2.64886 | 0.96457 | 0.5569522 | 5.85007 | pv | 0.6317545 | 2.311805 | py |
| MAL13P1.67  | PKH_141230 | PVX_122485 | PY03768 | PBANKA_141<br>160 | PCHAS_14135<br>0 | 3.1604  | 3.0123  | 2.69806 | 5.88155 | 1.61117 | 2.42652 | 0.87245 | 0.4270033 | 5.88155 | py | 0.2620308 | 1.611167 | pb |
| MAL13P1.70  | PKH_141290 | PVX_122510 | PY02832 | PBANKA_141<br>220 | PCHAS_14141<br>0 | 0.73112 | 4.70612 | 3.03839 | 2.06912 | 3.12454 | 2.40672 | 0.94368 | 0.6725364 | 4.70612 | pk | 0.6827547 | 3.038387 | pv |
| MAL13P1.72  | PKH_141310 | PVX_122520 | PY01882 | PBANKA_141<br>240 | PCHAS_14143<br>0 | 3.65499 | 1.6864  | 1.88587 | 0.04987 | 1.57408 | 2.28275 | 0.75221 | 0.5354523 | 0.04987 | py | 0.5913679 | 1.574077 | pb |
| MAL13P1.74  | PKH_141340 | PVX_122535 | PY00478 | PBANKA_141<br>280 | PCHAS_14146<br>0 | 3.42077 | 3.54988 | 3.29634 | 4.64291 | 3.70693 | 2.3062  | 0.4794  | 0.3265461 | 2.3062  | pc | 0.1349239 | 4.642912 | py |
| MAL13P1.76  | PKH_141410 | PVX_122565 | PY06921 | PBANKA_141<br>340 | PCHAS_14152<br>0 | 2.18747 | 3.20515 | 2.87974 | 4.67388 | 3.2361  | 4.14662 | 0.63071 | 0.4631029 | 4.67388 | py | 0.5711401 | 3.236104 | pb |
| MAL13P1.79  | PKH_141460 | PVX_122590 | PY04586 | PBANKA_141<br>390 | PCHAS_14157<br>0 | 2.19372 | 1.33694 | 4.16039 | 2.70923 | 0.69383 | 3.05328 | 0.94974 | 0.746349  | 4.16039 | pv | 0.8040579 | 2.709229 | py |
| MAL13P1.84  | PKH_141530 | PVX_122625 | PY06554 | PBANKA_141<br>450 | PCHAS_14163<br>0 | 1.19087 | 5.98413 | 5.75408 | 6.02282 | 0.57318 | 4.94387 | 0.61186 | 0.4362466 | 1.19087 | pf | 0.5453083 | 5.984125 | pk |



|            |            |            |         |                   |                  |         |         |         |         |         |         |         |           |         |    |           |          |    |
|------------|------------|------------|---------|-------------------|------------------|---------|---------|---------|---------|---------|---------|---------|-----------|---------|----|-----------|----------|----|
| MAL13P1.86 | PKH_141580 | PVX_122650 | PY02436 | PBANKA_141<br>510 | PCHAS_14169<br>0 | 4.76151 | 5.48986 | 4.95678 | 5.2566  | 1.88694 | 1.23307 | 1.03356 | 0.6575628 | 1.88694 | pb | 0.2570397 | 1.233066 | pc |
| MAL13P1.87 | PKH_141600 | PVX_122660 | PY03407 | PBANKA_141<br>530 | PCHAS_14171<br>0 | 2.84267 | 3.96595 | 3.27137 | 3.05413 | 5.14706 | 1.11541 | 0.89536 | 0.6432433 | 1.11541 | pc | 0.3351297 | 5.147064 | pb |
| MAL13P1.88 | PKH_141610 | PVX_122665 | PY03408 | PBANKA_141<br>540 | PCHAS_14172<br>0 | 2.53704 | 3.44077 | 0.14256 | 2.86539 | 3.06326 | 1.48734 | 0.86708 | 0.4959293 | 0.14256 | pv | 0.6199116 | 2.865385 | py |
| MAL13P1.89 | PKH_141670 | PVX_122695 | PY00191 | PBANKA_141<br>600 | PCHAS_14178<br>0 | 3.07245 | 3.9137  | 3.05101 | 5.25221 | 4.02486 | 3.28111 | 0.63103 | 0.3630181 | 5.25221 | py | 0.2678375 | 4.024856 | pb |
| MAL13P1.90 | PKH_141680 | PVX_122700 | PY00190 | PBANKA_141<br>610 | PCHAS_14179<br>0 | 2.88035 | 3.94983 | 4.06198 | 5.12517 | 4.30088 | 3.52531 | 0.52209 | 0.3914393 | 5.12517 | py | 0.4015363 | 4.300879 | pb |
| MAL13P1.91 | PKH_141690 | PVX_122705 | PY00189 | PBANKA_141<br>620 | PCHAS_14180<br>0 | 1.66302 | 1.09904 | 1.72377 | 0.30997 | 1.95961 | 1.02786 | 0.48492 | 0.3112952 | 0.30997 | py | 0.3149734 | 1.959605 | pb |
| MAL13P1.92 | PKH_141700 | PVX_122710 | PY00188 | PBANKA_141<br>630 | PCHAS_14181<br>0 | 2.45269 | 2.41311 | 2.47384 | 3.15483 | 2.41238 | 2.10939 | 0.19108 | 0.0809513 | 3.15483 | py | 0.1010075 | 2.412381 | pb |
| MAL13P1.93 | PKH_141710 | PVX_122715 | PY00187 | PBANKA_141<br>640 | PCHAS_14182<br>0 | 1.62827 | 1.40239 | 2.13327 | 1.86168 | 0.60528 | 1.33985 | 0.37928 | 0.250542  | 0.60528 | pb | 0.2410727 | 1.33985  | pc |
| MAL13P1.95 | PKH_141730 | PVX_122725 | PY03801 | PBANKA_141<br>660 | PCHAS_14184<br>0 | 4.06786 | 3.24811 | 3.58802 | 4.16037 | 3.40947 | 4.15733 | 0.35666 | 0.2640436 | 3.24811 | pk | 0.210094  | 3.588021 | pv |
| MAL7P1.100 | PKH_031300 | PVX_096360 | PY02456 | PBANKA_061<br>670 | PCHAS_06184<br>0 | 2.28679 | 3.07689 | 6.25723 | 5.55668 | 0.38049 | 2.87685 | 1.43542 | 1.1198421 | 5.55668 | py | 0.9232265 | 0.380488 | pb |
| MAL7P1.104 | PKH_031380 | PVX_096320 | PY00332 | PBANKA_061<br>750 | PCHAS_06192<br>0 | 2.23459 | 2.79162 | 2.77617 | 6.22301 | 3.15097 | 2.45852 | 0.68097 | 0.2498962 | 6.22301 | py | 0.2186687 | 3.150973 | pb |
| MAL7P1.11  | PKH_010150 | PVX_087705 | PY02321 | PBANKA_080<br>100 | PCHAS_08013<br>0 | 2.61672 | 3.19562 | 1.7751  | 1.16126 | 1.02603 | 1.18629 | 0.70231 | 0.4409054 | 3.19562 | pk | 0.4039283 | 1.775101 | pv |
| MAL7P1.112 | PKH_031500 | PVX_096275 | PY01732 | PBANKA_061<br>870 | PCHAS_06204<br>0 | 0.99616 | 4.06834 | 3.34103 | 0.55785 | 2.38722 | 2.88438 | 1.05875 | 0.8051969 | 0.55785 | py | 0.8822074 | 2.387221 | pb |
| MAL7P1.113 | PKH_031510 | PVX_096270 | PY04724 | PBANKA_061<br>880 | PCHAS_06205<br>0 | 1.83528 | 3.26517 | 3.26473 | 0.62669 | 0.38592 | 1.19648 | 1.02602 | 0.8174806 | 3.26517 | pk | 0.504789  | 3.264729 | pv |
| MAL7P1.117 | PKH_031560 | PVX_096255 | PY02841 | PBANKA_061<br>930 | PCHAS_06210<br>0 | 3.44771 | 3.76321 | 3.11567 | 2.90203 | 3.22788 | 3.89475 | 0.31002 | 0.2386447 | 3.89475 | pc | 0.216842  | 2.902028 | py |
| MAL7P1.12  | PKH_010170 | PVX_087715 | PY00683 | PBANKA_080<br>120 | PCHAS_08015<br>0 | 2.48785 | 2.21326 | 2.57071 | 2.31136 | 1.44446 | 2.02288 | 0.28155 | 0.164485  | 1.44446 | pb | 0.1334866 | 2.022877 | pc |
| MAL7P1.122 | PKH_031610 | PVX_096235 | PY02266 | PBANKA_061<br>990 | PCHAS_06216<br>0 | 2.62701 | 2.7203  | 2.51393 | 2.37964 | 2.70401 | 2.47762 | 0.11336 | 0.0865536 | 2.37964 | py | 0.0889428 | 2.704011 | pb |
| MAL7P1.126 | PKH_031760 | PVX_096150 | PY00053 | PBANKA_062<br>140 | PCHAS_06231<br>0 | 2.71075 | 2.87424 | 2.11151 | 2.66844 | 0.97818 | 2.43084 | 0.45548 | 0.2085271 | 0.97818 | pb | 0.2012597 | 2.430843 | pc |
| MAL7P1.129 | PKH_031780 | PVX_096140 | PY02675 | PBANKA_062<br>160 | PCHAS_06233<br>0 | 3.27578 | 2.46078 | 4.00106 | 2.21016 | 3.47448 | 3.21719 | 0.4772  | 0.3595135 | 2.21016 | py | 0.3997166 | 3.474479 | pb |
| MAL7P1.130 | PKH_031800 | PVX_096130 | PY01611 | PBANKA_062<br>180 | PCHAS_06235<br>0 | 3.67748 | 2.8424  | 3.22614 | 3.73794 | 0.2534  | 1.75554 | 0.96504 | 0.5634959 | 0.2534  | pb | 0.3367213 | 1.755541 | pc |
| MAL7P1.131 | PKH_031820 | PVX_096120 | PY01614 | PBANKA_062<br>200 | PCHAS_06237<br>0 | 1.07815 | 3.94981 | 6.1439  | 1.62718 | 6.03428 | 2.2249  | 1.18532 | 0.8480536 | 3.94981 | pk | 0.7557073 | 6.143897 | pv |
| MAL7P1.132 | PKH_031830 | PVX_096115 | PY01615 | PBANKA_062<br>210 | PCHAS_06238<br>0 | 4.34309 | 5.06915 | 5.21766 | 0.58252 | 5.07229 | 5.01967 | 0.45396 | 0.1854375 | 0.58252 | py | 0.231011  | 5.07229  | pb |

|             |            |            |         |                   |                  |         |         |         |         |         |         |         |           |         |    |           |          |    |
|-------------|------------|------------|---------|-------------------|------------------|---------|---------|---------|---------|---------|---------|---------|-----------|---------|----|-----------|----------|----|
| MAL7P1.137  | PKH_031850 | PVX_096105 | PY07654 | PBANKA_062<br>230 | PCHAS_06240<br>0 | 5.86131 | 3.12736 | 0.97408 | 5.92001 | 3.56785 | 2.48736 | 1.46006 | 1.2052851 | 5.86131 | pf | 1.3610738 | 3.127363 | pk |
| MAL7P1.138  | PKH_031880 | PVX_096085 | PY03674 | PBANKA_062<br>260 | PCHAS_06243<br>0 | 2.32912 | 2.82625 | 3.54192 | 2.27389 | 0.8789  | 1.6704  | 0.64568 | 0.4847749 | 0.8789  | pb | 0.4412895 | 1.670402 | pc |
| MAL7P1.139  | PKH_031890 | PVX_096080 | PY03676 | PBANKA_062<br>270 | PCHAS_06244<br>0 | 2.36925 | 1.52174 | 2.47668 | 1.87786 | 3.44548 | 2.8778  | 0.50519 | 0.390977  | 3.44548 | pb | 0.3615832 | 2.877801 | pc |
| MAL7P1.14   | PKH_010190 | PVX_087725 | PY00681 | PBANKA_080<br>140 | PCHAS_08017<br>0 | 1.8149  | 1.24595 | 0.27752 | 1.77693 | 2.59886 | 5.70424 | 0.87436 | 0.5780586 | 5.70424 | pc | 0.5170919 | 2.59886  | pb |
| MAL7P1.145  | PKH_021070 | PVX_081620 | PY01438 | PBANKA_021<br>040 | PCHAS_02088<br>0 | 4.83342 | 5.08558 | 4.61806 | 3.48333 | 5.0839  | 4.66146 | 0.37334 | 0.1779922 | 3.48333 | py | 0.1598703 | 5.0839   | pb |
| MAL7P1.146  | PKH_021080 | PVX_081625 | PY01439 | PBANKA_021<br>050 | PCHAS_02089<br>0 | 3.63216 | 4.17052 | 3.11343 | 1.74259 | 2.99309 | 5.86009 | 0.96894 | 0.6133977 | 5.86009 | pc | 0.424039  | 1.742594 | py |
| MAL7P1.147  | PKH_021090 | PVX_081630 | PY01440 | PBANKA_021<br>060 | PCHAS_02090<br>0 | 3.07957 | 4.66203 | 3.79237 | 5.50227 | 2.58867 | 2.27608 | 1.00206 | 0.7179287 | 5.50227 | py | 0.7746861 | 2.588667 | pb |
| MAL7P1.150  | PKH_021160 | PVX_081665 | PY02096 | PBANKA_021<br>130 | PCHAS_02097<br>0 | 1.54634 | 2.87086 | 1.62234 | 0.47819 | 4.05064 | 0.74936 | 0.96166 | 0.6531299 | 4.05064 | pb | 0.6171694 | 0.749363 | pc |
| MAL7P1.153  | PKH_021260 | PVX_081710 | PY01307 | PBANKA_021<br>230 | PCHAS_02107<br>0 | 4.23544 | 4.98627 | 5.66415 | 5.23587 | 3.04959 | 3.19181 | 0.90158 | 0.6945554 | 3.04959 | pb | 0.4195787 | 3.191811 | pc |
| MAL7P1.154  | PKH_021280 | PVX_081720 | PY01310 | PBANKA_021<br>250 | PCHAS_02109<br>0 | 4.11295 | 3.43486 | 3.16829 | 3.6045  | 3.47901 | 1.65944 | 0.48898 | 0.2228609 | 1.65944 | pc | 0.1200904 | 4.112954 | pf |
| MAL7P1.155  | PKH_021300 | PVX_081725 | PY02958 | PBANKA_021<br>270 | PCHAS_02111<br>0 | 4.935   | 5.02058 | 4.09332 | 1.94318 | 0.21572 | 2.05726 | 1.39345 | 1.0737827 | 1.94318 | py | 0.9512499 | 0.215724 | pb |
| MAL7P1.156  | PKH_021310 | PVX_081735 | PY02956 | PBANKA_021<br>280 | PCHAS_02112<br>0 | 0.21226 | 5.66973 | 5.5359  | 5.42945 | 5.34217 | 5.73951 | 0.2662  | 0.1275248 | 0.21226 | pf | 0.1259482 | 5.669728 | pk |
| MAL7P1.157  | PKH_021320 | PVX_081740 | PY01479 | PBANKA_021<br>290 | PCHAS_02113<br>0 | 3.6309  | 3.80468 | 3.51751 | 5.47591 | 4.05366 | 3.99416 | 0.42844 | 0.1798812 | 5.47591 | py | 0.1626079 | 4.053656 | pb |
| MAL7P1.157a | PKH_021330 | PVX_081745 | PY01477 | PBANKA_021<br>300 | PCHAS_02114<br>0 | 2.35553 | 3.53261 | 3.09272 | 2.94664 | 2.81399 | 2.76553 | 0.27282 | 0.1836596 | 3.53261 | pk | 0.1598926 | 3.092721 | pv |
| MAL7P1.17   | PKH_010230 | PVX_087745 | PY01949 | PBANKA_080<br>180 | PCHAS_08021<br>0 | 5.34842 | 5.78345 | 5.83062 | 5.20536 | 5.52983 | 5.71141 | 0.20698 | 0.1471641 | 5.20536 | py | 0.1385597 | 5.529826 | pb |
| MAL7P1.18   | PKH_010300 | PVX_087765 | PY01945 | PBANKA_080<br>220 | PCHAS_08025<br>0 | 5.21087 | 5.28719 | 5.32987 | 5.54136 | 5.32052 | 5.28275 | 0.06849 | 0.0313549 | 5.54136 | py | 0.0308611 | 5.320524 | pb |
| MAL7P1.201  | PKH_010410 | PVX_087820 | PY02474 | PBANKA_080<br>330 | PCHAS_08036<br>0 | 2.82136 | 3.31099 | 2.65511 | 3.51123 | 0.60928 | 2.25397 | 0.68754 | 0.3826288 | 0.60928 | pb | 0.33644   | 2.253971 | pc |
| MAL7P1.202  | PKH_010450 | PVX_087840 | PY03814 | PBANKA_080<br>360 | PCHAS_08039<br>0 | 2.42133 | 3.5206  | 2.71529 | 2.62383 | 1.67192 | 2.73341 | 0.37537 | 0.2417705 | 1.67192 | pb | 0.2976834 | 2.733406 | pc |
| MAL7P1.203  | PKH_010460 | PVX_087845 | PY03816 | PBANKA_080<br>370 | PCHAS_08040<br>0 | 4.54628 | 4.06097 | 4.91435 | 5.19199 | 4.06873 | 4.52834 | 0.33243 | 0.2661862 | 5.19199 | py | 0.2178288 | 4.068727 | pb |
| MAL7P1.204  | PKH_010490 | PVX_087865 | PY06087 | PBANKA_080<br>410 | PCHAS_08044<br>0 | 2.25642 | 0.41644 | 1.72404 | 0.76679 | 1.41398 | 2.2301  | 0.60223 | 0.4611499 | 0.41644 | pk | 0.5764374 | 1.724044 | pv |
| MAL7P1.205  | PKH_010500 | PVX_087870 | PY01095 | PBANKA_080<br>420 | PCHAS_08045<br>0 | 2.8774  | 2.95591 | 2.23018 | 6.24102 | 2.44438 | 2.68406 | 0.6475  | 0.2317516 | 6.24102 | py | 0.2297709 | 2.444381 | pb |
| MAL7P1.207  | PKH_010520 | PVX_087880 | PY01098 | PBANKA_080<br>440 | PCHAS_08047<br>0 | 4.80507 | 4.29091 | 3.98647 | 0.74314 | 2.72463 | 3.32065 | 1.01509 | 0.6101395 | 0.74314 | py | 0.4472121 | 2.724626 | pb |



|            |            |            |         |                   |                  |         |         |         |         |         |         |         |           |         |    |           |          |    |
|------------|------------|------------|---------|-------------------|------------------|---------|---------|---------|---------|---------|---------|---------|-----------|---------|----|-----------|----------|----|
| MAL7P1.209 | PKH_010550 | PVX_087895 | PY00142 | PBANKA_080<br>460 | PCHAS_08049<br>0 | 2.5852  | 2.37385 | 1.99705 | 2.1333  | 2.13696 | 1.69017 | 0.21258 | 0.1657415 | 1.69017 | pc | 0.0951145 | 2.585205 | pf |
| MAL7P1.22  | PKH_010560 | PVX_087900 | PY00141 | PBANKA_080<br>470 | PCHAS_08050<br>0 | 0.39836 | 0.18218 | 5.11021 | 2.50233 | 1.99737 | 1.76906 | 1.14353 | 0.7838333 | 5.11021 | pv | 0.7964742 | 2.502332 | py |
| MAL7P1.24  | PKH_010600 | PVX_087920 | PY00137 | PBANKA_080<br>510 | PCHAS_08054<br>0 | 1.87866 | 1.93349 | 3.52733 | 2.17354 | 0.8643  | 0.55467 | 0.72279 | 0.5376106 | 3.52733 | pv | 0.5982939 | 2.173537 | py |
| MAL7P1.25  | PKH_010610 | PVX_087925 | PY00136 | PBANKA_080<br>520 | PCHAS_08055<br>0 | 2.88405 | 3.52677 | 5.85598 | 3.03807 | 1.57773 | 2.48385 | 0.91253 | 0.500653  | 5.85598 | pv | 0.5873112 | 3.038071 | py |
| MAL7P1.26  | PKH_010640 | PVX_087945 | PY00132 | PBANKA_080<br>560 | PCHAS_08059<br>0 | 1.69416 | 3.81299 | 0.00143 | 5.82158 | 3.25555 | 2.1522  | 1.33113 | 1.1576401 | 0.00143 | pv | 0.8055425 | 5.821578 | py |
| MAL7P1.27  | PKH_010710 | PVX_087980 | PY05061 | PBANKA_121<br>950 | PCHAS_12202<br>0 | 1.47723 | 1.41177 | 0.91151 | 2.46896 | 2.11881 | 0.59597 | 0.52429 | 0.4177111 | 2.46896 | py | 0.3453792 | 2.118812 | pb |
| MAL7P1.30  | PKH_010820 | PVX_088035 | PY06572 | PBANKA_122<br>060 | PCHAS_12213<br>0 | 4.59527 | 6.25571 | 4.62192 | 5.27821 | 5.31398 | 4.89128 | 0.45657 | 0.2750021 | 6.25571 | pk | 0.2764107 | 4.621917 | pv |
| MAL7P1.32  | PKH_010860 | PVX_088055 | PY04689 | PBANKA_122<br>100 | PCHAS_12217<br>0 | 2.40765 | 1.88434 | 3.0361  | 0.03196 | 3.03313 | 2.33637 | 0.70404 | 0.3697033 | 0.03196 | py | 0.3057609 | 3.033127 | pb |
| MAL7P1.320 | PKH_010480 | PVX_087860 | PY02795 | PBANKA_080<br>400 | PCHAS_08043<br>0 | 2.38576 | 1.43084 | 2.64624 | 2.46626 | 2.68464 | 2.09659 | 0.31399 | 0.1697057 | 1.43084 | pk | 0.1671382 | 2.646239 | pv |
| MAL7P1.340 | PKH_010440 | PVX_087835 | PY03813 | PBANKA_080<br>350 | PCHAS_08038<br>0 | 4.02027 | 3.27723 | 3.79061 | 4.6914  | 3.94734 | 4.16316 | 0.30994 | 0.2231188 | 4.6914  | py | 0.2788985 | 3.94734  | pb |
| MAL7P1.36  | PKH_010950 | PVX_088100 | PY01895 | PBANKA_122<br>190 | PCHAS_12226<br>0 | 2.88612 | 3.23156 | 1.72859 | 1.02574 | 3.37871 | 6.13557 | 1.14828 | 0.7711861 | 6.13557 | pc | 0.4988897 | 1.025744 | py |
| MAL7P1.37  | PKH_010960 | PVX_088105 | PY01894 | PBANKA_122<br>200 | PCHAS_12227<br>0 | 3.42532 | 3.00319 | 1.9945  | 1.91023 | 1.88441 | 2.72255 | 0.56032 | 0.3862195 | 3.42532 | pf | 0.2306017 | 3.003188 | pk |
| MAL7P1.66  | PKH_142090 | PVX_122905 | PY01860 | PBANKA_142<br>020 | PCHAS_14220<br>0 | 3.72859 | 3.10416 | 3.00566 | 3.24473 | 2.94247 | 2.44912 | 0.28004 | 0.1914592 | 3.72859 | pf | 0.2147002 | 3.104158 | pk |
| MAL7P1.76  | PKH_030230 | PVX_000615 | PY01026 | PBANKA_061<br>390 | PCHAS_06156<br>0 | 1.37506 | 1.68892 | 1.78027 | 0.2741  | 0.71264 | 0.49178 | 0.56096 | 0.4529539 | 0.2741  | py | 0.4005873 | 0.712643 | pb |
| MAL7P1.77  | PKH_030220 | PVX_000610 | PY01024 | PBANKA_061<br>400 | PCHAS_06157<br>0 | 3.98317 | 3.9729  | 3.5483  | 2.82692 | 3.5185  | 3.12762 | 0.33856 | 0.2619917 | 2.82692 | py | 0.320038  | 3.518496 | pb |
| MAL7P1.81  | PKH_030170 | PVX_000590 | PY00595 | PBANKA_061<br>450 | PCHAS_06162<br>0 | 2.4721  | 1.17629 | 2.29222 | 2.31232 | 2.28243 | 2.4539  | 0.2479  | 0.070271  | 1.17629 | pk | 0.0828147 | 2.292223 | pv |
| MAL7P1.84  | PKH_030110 | PVX_000570 | PY04342 | PBANKA_061<br>490 | PCHAS_06166<br>0 | 5.44121 | 6.27592 | 4.98343 | 2.77142 | 5.2956  | 5.38323 | 0.67499 | 0.2876204 | 2.77142 | py | 0.3376181 | 5.295603 | pb |
| MAL7P1.86  | PKH_030100 | PVX_000565 | PY00824 | PBANKA_061<br>500 | PCHAS_06167<br>0 | 6.152   | 1.22045 | 1.95594 | 2.1371  | 2.24939 | 0.13683 | 0.85272 | 0.6058408 | 6.152   | pf | 0.5734302 | 1.220453 | pk |
| MAL7P1.87  | PKH_030070 | PVX_000550 | PY03296 | PBANKA_061<br>530 | PCHAS_06170<br>0 | 5.15858 | 4.98666 | 5.96719 | 3.82848 | 6.22777 | 4.36735 | 0.69518 | 0.5681918 | 3.82848 | py | 0.4429405 | 6.227773 | pb |
| MAL7P1.88  | PKH_030040 | PVX_000535 | PY03292 | PBANKA_061<br>560 | PCHAS_06173<br>0 | 2.52907 | 2.72429 | 1.94893 | 2.23968 | 2.7933  | 2.57987 | 0.22996 | 0.1497697 | 1.94893 | pv | 0.1021644 | 2.239675 | py |
| MAL7P1.91  | PKH_030020 | PVX_000525 | PY02763 | PBANKA_061<br>580 | PCHAS_06175<br>0 | 4.12845 | 4.99586 | 4.96773 | 3.84798 | 4.60622 | 4.38748 | 0.36765 | 0.2895327 | 3.84798 | py | 0.3619159 | 4.606224 | pb |
| MAL7P1.99  | PKH_031290 | PVX_096365 | PY05856 | PBANKA_061<br>660 | PCHAS_06183<br>0 | 4.17419 | 3.12151 | 4.43121 | 5.7251  | 3.88377 | 4.49424 | 0.57851 | 0.3840332 | 5.7251  | py | 0.4074369 | 3.883773 | pb |

|            |            |            |         |                   |                  |         |         |         |         |         |         |         |           |         |    |           |          |    |
|------------|------------|------------|---------|-------------------|------------------|---------|---------|---------|---------|---------|---------|---------|-----------|---------|----|-----------|----------|----|
| MAL8P1.10  | PKH_050170 | PVX_088895 | PY07165 | PBANKA_070<br>160 | PCHAS_09364<br>0 | 1.94006 | 2.51748 | 2.24805 | 2.45833 | 2.59048 | 2.29941 | 0.17979 | 0.1120989 | 1.94006 | pf | 0.1253382 | 2.517475 | pk |
| MAL8P1.100 | PKH_142660 | PVX_123170 | PY00745 | PBANKA_142<br>550 | PCHAS_14273<br>0 | 2.58822 | 2.96433 | 2.32759 | 5.86346 | 2.63218 | 2.43438 | 0.64041 | 0.1669085 | 5.86346 | py | 0.1976451 | 2.632182 | pb |
| MAL8P1.101 | PKH_142670 | PVX_123175 | PY00746 | PBANKA_142<br>560 | PCHAS_14274<br>0 | 4.26017 | 2.68214 | 4.56984 | 1.18357 | 3.45832 | 3.0767  | 0.89099 | 0.6142346 | 1.18357 | py | 0.7677932 | 3.458323 | pb |
| MAL8P1.103 | PKH_142720 | PVX_123200 | PY04680 | PBANKA_142<br>610 | PCHAS_14279<br>0 | 2.68523 | 4.70062 | 3.11072 | 3.27893 | 3.2992  | 3.29418 | 0.36985 | 0.1594867 | 4.70062 | pk | 0.1573037 | 3.110715 | pv |
| MAL8P1.104 | PKH_142730 | PVX_123205 | PY01168 | PBANKA_142<br>620 | PCHAS_14280<br>0 | 0.79092 | 5.68031 | 3.47106 | 5.38878 | 1.07779 | 1.91747 | 1.19545 | 0.8985097 | 3.47106 | pv | 0.7018071 | 5.388781 | py |
| MAL8P1.105 | PKH_142740 | PVX_123210 | PY01173 | PBANKA_142<br>630 | PCHAS_14281<br>0 | 2.36185 | 3.06965 | 2.87714 | 2.16259 | 1.70973 | 2.52198 | 0.37243 | 0.2844692 | 1.70973 | pb | 0.3555866 | 2.521981 | pc |
| MAL8P1.109 | PKH_142830 | PVX_123260 | PY01654 | PBANKA_142<br>720 | PCHAS_14290<br>0 | 5.64466 | 2.81259 | 5.77781 | 2.82321 | 4.78539 | 4.72502 | 0.97451 | 0.7748478 | 2.81259 | pk | 0.720454  | 5.777809 | pv |
| MAL8P1.11  | PKH_050190 | PVX_088905 | PY06243 | PBANKA_070<br>170 | PCHAS_09363<br>0 | 3.67318 | 4.27535 | 2.91943 | 2.896   | 2.11535 | 1.9519  | 0.65078 | 0.5050719 | 4.27535 | pk | 0.6254821 | 2.91943  | pv |
| MAL8P1.121 | PKH_010980 | PVX_088115 | PY01892 | PBANKA_122<br>230 | PCHAS_12229<br>0 | 5.44066 | 3.24661 | 3.44902 | 1.63165 | 3.98854 | 2.31721 | 0.94712 | 0.6977388 | 5.44066 | pf | 0.8721735 | 3.246613 | pk |
| MAL8P1.122 | PKH_010990 | PVX_088120 | PY01891 | PBANKA_122<br>240 | PCHAS_12230<br>0 | 5.79376 | 3.53553 | 3.88298 | 3.13114 | 3.48807 | 4.17514 | 0.61619 | 0.2877814 | 5.79376 | pf | 0.3597268 | 3.535529 | pk |
| MAL8P1.127 | PKH_011070 | PVX_088165 | PY04191 | PBANKA_122<br>300 | PCHAS_12236<br>0 | 2.36865 | 0.51024 | 2.51842 | 2.57057 | 2.19207 | 3.68339 | 0.6169  | 0.3386476 | 0.51024 | pk | 0.4233095 | 2.51842  | pv |
| MAL8P1.130 | PKH_011110 | PVX_088185 | PY01073 | PBANKA_122<br>340 | PCHAS_12240<br>0 | 2.29528 | 1.46974 | 1.41101 | 5.38862 | 4.73503 | 5.22195 | 1.43058 | 1.0980285 | 2.29528 | pf | 0.7814597 | 1.469738 | pk |
| MAL8P1.131 | PKH_011130 | PVX_088195 | PY07255 | PBANKA_122<br>360 | PCHAS_12242<br>0 | 2.41132 | 3.01745 | 2.50628 | 5.63057 | 3.30042 | 2.99106 | 0.6733  | 0.2800544 | 5.63057 | py | 0.2727289 | 3.300416 | pb |
| MAL8P1.132 | PKH_011180 | PVX_088220 | PY02867 | PBANKA_122<br>410 | PCHAS_12247<br>0 | 1.27049 | 4.04768 | 1.83157 | 3.92788 | 4.75786 | 0.15683 | 1.36927 | 1.0876867 | 1.27049 | pf | 1.3596083 | 4.047678 | pk |
| MAL8P1.134 | PKH_011210 | PVX_088235 | PY04695 | PBANKA_122<br>440 | PCHAS_12250<br>0 | 5.19497 | 4.18171 | 4.61338 | 5.39654 | 4.24327 | 4.80727 | 0.3934  | 0.3154515 | 5.39654 | py | 0.3017869 | 4.243272 | pb |
| MAL8P1.139 | PKH_011410 | PVX_093535 | PY00801 | PBANKA_122<br>610 | PCHAS_12267<br>0 | 4.02278 | 3.63426 | 3.35164 | 2.89185 | 3.22465 | 2.01517 | 0.4795  | 0.3081094 | 2.01517 | pc | 0.2173515 | 4.02278  | pf |
| MAL8P1.14  | PKH_050250 | PVX_088935 | PY05780 | PBANKA_070<br>230 | PCHAS_09357<br>0 | 3.98381 | 3.66931 | 3.80173 | 5.77806 | 5.45772 | 2.42985 | 0.88645 | 0.7529485 | 2.42985 | pc | 0.4926226 | 5.778062 | py |
| MAL8P1.140 | PKH_011420 | PVX_093540 | PY00802 | PBANKA_122<br>620 | PCHAS_12268<br>0 | 4.23869 | 5.88548 | 3.32952 | 3.63741 | 3.17211 | 3.79683 | 0.63033 | 0.3067795 | 5.88548 | pk | 0.3065023 | 3.329517 | pv |
| MAL8P1.141 | PKH_011430 | PVX_093545 | PY00803 | PBANKA_122<br>630 | PCHAS_12269<br>0 | 1.14618 | 0.76044 | 1.43317 | 5.80434 | 0.24919 | 1.45095 | 0.58325 | 0.3748972 | 5.80434 | py | 0.2443751 | 0.249192 | pb |
| MAL8P1.142 | PKH_011450 | PVX_093555 | PY00806 | PBANKA_122<br>650 | PCHAS_12271<br>0 | 3.70056 | 4.24278 | 3.56707 | 4.3893  | 3.6957  | 3.72664 | 0.23256 | 0.1413292 | 4.3893  | py | 0.1754455 | 3.695699 | pb |
| MAL8P1.144 | PKH_011480 | PVX_093570 | PY00809 | PBANKA_122<br>670 | PCHAS_12273<br>0 | 6.24259 | 0.57424 | 0.24682 | 0.06022 | 0.65518 | 0.23483 | 0.20363 | 0.1602866 | 0.65518 | pb | 0.2003582 | 0.234832 | pc |
| MAL8P1.146 | PKH_011510 | PVX_093585 | PY05625 | PBANKA_122<br>700 | PCHAS_12276<br>0 | 5.31734 | 5.80789 | 5.67211 | 2.90748 | 5.31818 | 5.60893 | 0.59099 | 0.1688963 | 2.90748 | py | 0.1384318 | 5.318176 | pb |

|            |            |            |         |                   |                  |         |         |         |         |         |         |         |           |         |    |           |          |    |
|------------|------------|------------|---------|-------------------|------------------|---------|---------|---------|---------|---------|---------|---------|-----------|---------|----|-----------|----------|----|
| MAL8P1.15  | PKH_050280 | PVX_088950 | PY01363 | PBANKA_070<br>260 | PCHAS_09354<br>0 | 2.91587 | 0.56331 | 2.30319 | 0.51593 | 4.43955 | 2.26958 | 1.05163 | 0.8279661 | 4.43955 | pb | 1.0349576 | 2.269581 | pc |
| MAL8P1.150 | PKH_011570 | PVX_093610 | PY07180 | PBANKA_122<br>760 | PCHAS_12283<br>0 | 5.73818 | 5.48404 | 6.16478 | 5.95323 | 5.66854 | 0.6039  | 0.35239 | 0.193088  | 0.6039  | pc | 0.1778236 | 5.484037 | pk |
| MAL8P1.151 | PKH_011580 | PVX_093615 | PY04281 | PBANKA_122<br>770 | PCHAS_12284<br>0 | 5.95738 | 5.56911 | 5.33249 | 5.65295 | 4.45923 | 0.75705 | 0.54829 | 0.3637209 | 0.75705 | pc | 0.177182  | 4.459232 | pb |
| MAL8P1.154 | PKH_011650 | PVX_093645 | PY02606 | PBANKA_122<br>830 | PCHAS_12290<br>0 | 1.24212 | 2.40095 | 0.11374 | 1.17319 | 0.17251 | 5.82134 | 0.83198 | 0.5526831 | 2.40095 | pk | 0.6761614 | 0.113736 | pv |
| MAL8P1.156 | PKH_011660 | PVX_093650 | PY03463 | PBANKA_122<br>840 | PCHAS_12291<br>0 | 2.60893 | 2.38124 | 4.90425 | 2.13459 | 2.24038 | 1.30262 | 0.7028  | 0.3105913 | 4.90425 | pv | 0.3617926 | 2.134594 | py |
| MAL8P1.157 | PKH_011670 | PVX_093655 | PY03464 | PBANKA_122<br>850 | PCHAS_12292<br>0 | 3.0924  | 6.2452  | 2.93103 | 0.06055 | 3.36222 | 3.4132  | 1.10275 | 0.7467008 | 6.2452  | pk | 0.8255785 | 2.931035 | pv |
| MAL8P1.16  | PKH_050290 | PVX_088955 | PY01364 | PBANKA_070<br>270 | PCHAS_09353<br>0 | 2.604   | 2.92322 | 0.53193 | 0.26765 | 6.0449  | 4.97585 | 1.22285 | 0.9363088 | 2.92322 | pk | 1.1043168 | 0.531928 | pv |
| MAL8P1.17  | PKH_050300 | PVX_088960 | PY00638 | PBANKA_070<br>280 | PCHAS_09352<br>0 | 3.74545 | 4.22532 | 3.7465  | 1.4038  | 4.1325  | 4.13411 | 0.59936 | 0.1734943 | 1.4038  | py | 0.2168678 | 4.132504 | pb |
| MAL8P1.18  | PKH_050330 | PVX_088975 | PY04437 | PBANKA_070<br>310 | PCHAS_09349<br>0 | 3.76808 | 4.63928 | 2.98375 | 2.35571 | 1.35415 | 2.75153 | 0.82162 | 0.6083937 | 4.63928 | pk | 0.7024372 | 2.983751 | pv |
| MAL8P1.19  | PKH_050390 | PVX_089015 | PY03587 | PBANKA_070<br>370 | PCHAS_09343<br>0 | 1.87951 | 1.48274 | 1.35867 | 2.05185 | 6.08575 | 1.6336  | 0.48683 | 0.2179892 | 6.08575 | pb | 0.2724865 | 1.633597 | pc |
| MAL8P1.200 | PKH_011320 | PVX_088280 | PY05005 | PBANKA_122<br>520 | PCHAS_12258<br>0 | 0.74672 | 2.6934  | 2.40173 | 0.76848 | 3.46099 | 2.18665 | 0.80904 | 0.7159858 | 3.46099 | pb | 0.8949823 | 2.186652 | pc |
| MAL8P1.201 | PKH_011310 | PVX_088275 | PY05006 | PBANKA_122<br>510 | PCHAS_12257<br>0 | 0.04344 | 5.10805 | 5.90193 | 5.59655 | 0.8001  | 4.74978 | 0.64291 | 0.4741458 | 0.8001  | pb | 0.3809882 | 4.749777 | pc |
| MAL8P1.21  | PKH_050420 | PVX_089030 | PY00517 | PBANKA_070<br>400 | PCHAS_09340<br>0 | 2.85546 | 4.14652 | 2.67727 | 6.05965 | 3.09304 | 6.02835 | 1.26812 | 0.9284266 | 6.05965 | py | 1.1448855 | 3.09304  | pb |
| MAL8P1.24  | PKH_050480 | PVX_089060 | PY01031 | PBANKA_070<br>460 | PCHAS_09334<br>0 | 2.94814 | 2.5192  | 2.327   | 1.4705  | 2.66992 | 1.98093 | 0.39314 | 0.2620286 | 1.4705  | py | 0.2898541 | 2.669922 | pb |
| MAL8P1.27  | PKH_050580 | PVX_089095 | PY05664 | PBANKA_070<br>540 | PCHAS_07147<br>0 | 4.46387 | 4.06463 | 3.80123 | 4.61903 | 4.78441 | 4.65395 | 0.28794 | 0.1819704 | 3.80123 | pv | 0.227463  | 4.619028 | py |
| MAL8P1.33  | PKH_050670 | PVX_089145 | PY02080 | PBANKA_070<br>630 | PCHAS_07156<br>0 | 4.62827 | 3.24603 | 2.54019 | 2.42021 | 2.60578 | 2.29614 | 0.53725 | 0.2270908 | 4.62827 | pf | 0.1074036 | 3.246031 | pk |
| MAL8P1.34  | PKH_050680 | PVX_089150 | PY02081 | PBANKA_070<br>640 | PCHAS_07157<br>0 | 3.52007 | 3.98406 | 4.42722 | 1.80279 | 4.73475 | 4.79578 | 0.77514 | 0.4052816 | 1.80279 | py | 0.4297196 | 4.734754 | pb |
| MAL8P1.40  | PKH_050780 | PVX_089205 | PY02680 | PBANKA_070<br>740 | PCHAS_07167<br>0 | 2.53966 | 0.8891  | 1.8011  | 3.11736 | 0.86505 | 5.12932 | 1.14297 | 0.7805717 | 5.12932 | pc | 0.6466501 | 3.117358 | py |
| MAL8P1.41  | PKH_050790 | PVX_089210 | PY02682 | PBANKA_070<br>750 | PCHAS_07168<br>0 | 1.67979 | 2.85313 | 2.5838  | 2.02478 | 2.64406 | 2.58063 | 0.2993  | 0.178355  | 1.67979 | pf | 0.1556117 | 2.853128 | pk |
| MAL8P1.43  | PKH_050820 | PVX_089225 | PY02499 | PBANKA_070<br>780 | PCHAS_07171<br>0 | 1.94686 | 3.47834 | 2.91899 | 2.4718  | 2.39267 | 4.42866 | 0.66911 | 0.4115577 | 4.42866 | pc | 0.3832133 | 1.946865 | pf |
| MAL8P1.47  | PKH_050860 | PVX_089245 | PY07232 | PBANKA_070<br>820 | PCHAS_07175<br>0 | 1.24352 | 5.8791  | 6.16911 | 5.3192  | 0.49542 | 6.22874 | 0.52777 | 0.3618085 | 1.24352 | pf | 0.3797604 | 5.879104 | pk |
| MAL8P1.50  | PKH_050910 | PVX_089270 | PY04245 | PBANKA_070<br>890 | PCHAS_07180<br>0 | 3.37252 | 3.69789 | 2.50161 | 3.79919 | 3.29744 | 3.59967 | 0.32086 | 0.165424  | 2.50161 | pv | 0.1568997 | 3.79919  | py |

|           |            |            |         |                   |                  |         |         |         |         |         |         |         |           |         |    |           |          |    |
|-----------|------------|------------|---------|-------------------|------------------|---------|---------|---------|---------|---------|---------|---------|-----------|---------|----|-----------|----------|----|
| MAL8P1.53 | PKH_051000 | PVX_089310 | PY07455 | PBANKA_070<br>980 | PCHAS_07189<br>0 | 4.44338 | 5.56734 | 4.90574 | 4.70048 | 5.18998 | 5.20258 | 0.31838 | 0.2497422 | 5.56734 | pk | 0.3121778 | 4.905741 | pv |
| MAL8P1.55 | PKH_051020 | PVX_089320 | PY02422 | PBANKA_071<br>000 | PCHAS_07191<br>0 | 3.91472 | 3.17086 | 3.15845 | 5.41082 | 4.08216 | 2.90963 | 0.69479 | 0.3857589 | 5.41082 | py | 0.2543737 | 4.082159 | pb |
| MAL8P1.56 | PKH_051040 | PVX_089330 | PY02420 | PBANKA_071<br>020 | PCHAS_07193<br>0 | 4.78896 | 5.51534 | 4.88631 | 5.37873 | 0.59619 | 5.11189 | 0.49771 | 0.2437595 | 0.59619 | pb | 0.3046993 | 5.111891 | pc |
| MAL8P1.61 | PKH_051150 | PVX_089380 | PY03073 | PBANKA_071<br>110 | PCHAS_07202<br>0 | 4.80781 | 5.16504 | 4.14356 | 3.6502  | 3.31461 | 5.34244 | 0.70115 | 0.5427437 | 3.31461 | pb | 0.5447718 | 5.342441 | pc |
| MAL8P1.62 | PKH_051160 | PVX_089385 | PY03074 | PBANKA_071<br>120 | PCHAS_07203<br>0 | 4.87604 | 5.61828 | 6.05867 | 2.36737 | 3.85003 | 1.6132  | 1.37688 | 1.0457989 | 2.36737 | py | 0.8651857 | 3.850025 | pb |
| MAL8P1.63 | PKH_051170 | PVX_089390 | PY03075 | PBANKA_071<br>130 | PCHAS_07204<br>0 | 2.28208 | 3.76422 | 4.99831 | 6.06638 | 5.88861 | 2.00519 | 1.37815 | 1.1184439 | 2.28208 | pf | 0.8669595 | 3.764224 | pk |
| MAL8P1.64 | PKH_051220 | PVX_089415 | PY06156 | PBANKA_071<br>180 | PCHAS_07209<br>0 | 1.6444  | 2.56822 | 2.74663 | 2.4079  | 0.91524 | 1.20241 | 0.66012 | 0.4936076 | 0.91524 | pb | 0.3156376 | 1.202409 | pc |
| MAL8P1.65 | PKH_051310 | PVX_089480 | PY03840 | PBANKA_071<br>210 | PCHAS_07212<br>0 | 2.29595 | 4.08653 | 4.9165  | 2.23555 | 4.6835  | 2.74043 | 1.0691  | 0.8477079 | 4.9165  | pv | 0.9334126 | 2.235545 | py |
| MAL8P1.69 | PKH_051370 | PVX_089505 | PY01841 | PBANKA_071<br>260 | PCHAS_07217<br>0 | 4.27286 | 3.12116 | 3.47671 | 2.91581 | 3.94332 | 3.97815 | 0.44678 | 0.3306286 | 2.91581 | py | 0.4132857 | 3.943322 | pb |
| MAL8P1.70 | PKH_051380 | PVX_089510 | PY03958 | PBANKA_071<br>270 | PCHAS_07218<br>0 | 6.12957 | 0.18087 | 5.51606 | 0.02247 | 5.68414 | 1.8283  | 0.59191 | 0.3139028 | 1.8283  | pc | 0.2390014 | 5.516057 | pv |
| MAL8P1.71 | PKH_051390 | PVX_089515 | PY03957 | PBANKA_071<br>280 | PCHAS_07219<br>0 | 0.12364 | 3.98866 | 4.81389 | 2.07905 | 1.15398 | 1.49751 | 1.29282 | 0.9580175 | 4.81389 | pv | 1.0521352 | 2.079055 | py |
| MAL8P1.76 | PKH_051570 | PVX_089570 | PY05593 | PBANKA_071<br>400 | PCHAS_07231<br>0 | 1.22857 | 3.48648 | 0.59482 | 0.02538 | 0.77437 | 3.16026 | 1.08012 | 0.7537256 | 3.48648 | pk | 0.8972696 | 0.594818 | pv |
| MAL8P1.83 | PKH_051690 | PVX_089625 | PY00540 | PBANKA_071<br>520 | PCHAS_07243<br>0 | 2.80298 | 1.33611 | 2.68173 | 1.99191 | 2.6098  | 2.53381 | 0.37211 | 0.1918001 | 1.33611 | pk | 0.2217672 | 2.681732 | pv |
| MAL8P1.84 | PKH_051700 | PVX_089630 | PY00541 | PBANKA_071<br>530 | PCHAS_07244<br>0 | 4.65116 | 4.63747 | 4.77164 | 5.30214 | 5.4193  | 4.92487 | 0.26434 | 0.1876766 | 5.4193  | pb | 0.1962871 | 4.924874 | pc |
| MAL8P1.91 | PKH_142390 | PVX_123050 | PY02403 | PBANKA_142<br>310 | PCHAS_14249<br>0 | 6.00436 | 3.76017 | 4.27802 | 5.45436 | 5.39346 | 5.32663 | 0.58123 | 0.3708133 | 3.76017 | pk | 0.1846583 | 4.278025 | pv |
| MAL8P1.92 | PKH_142400 | PVX_123055 | PY02401 | PBANKA_142<br>320 | PCHAS_14250<br>0 | 1.31226 | 0.95698 | 1.78718 | 1.96114 | 0.61826 | 1.24053 | 0.37413 | 0.3101612 | 0.61826 | pb | 0.3697701 | 1.24053  | pc |
| MAL8P1.96 | PKH_142530 | PVX_123115 | PY05996 | PBANKA_142<br>440 | PCHAS_14262<br>0 | 4.77313 | 4.35936 | 4.03772 | 5.28047 | 3.64303 | 3.1143  | 0.60298 | 0.4745698 | 3.1143  | pc | 0.3629361 | 5.280469 | py |
| PF07_0010 | PKH_010120 | PVX_087690 | PY05768 | PBANKA_080<br>070 | PCHAS_08010<br>0 | 3.49027 | 3.33087 | 2.49339 | 2.32231 | 3.12081 | 2.78719 | 0.38984 | 0.3081118 | 2.32231 | py | 0.3851398 | 3.120811 | pb |
| PF07_0011 | PKH_010130 | PVX_087695 | PY02319 | PBANKA_080<br>080 | PCHAS_08011<br>0 | 2.17496 | 3.514   | 0.16215 | 3.85469 | 4.18757 | 0.29521 | 1.27794 | 0.9887886 | 0.29521 | pc | 0.5883242 | 0.162151 | pv |
| PF07_0012 | PKH_010140 | PVX_087700 | PY02320 | PBANKA_080<br>090 | PCHAS_08012<br>0 | 4.1361  | 3.24787 | 2.6926  | 0.33101 | 3.27871 | 2.64365 | 0.83257 | 0.4157103 | 0.33101 | py | 0.5119293 | 3.278708 | pb |
| PF07_0014 | PKH_010200 | PVX_087730 | PY00680 | PBANKA_080<br>150 | PCHAS_08018<br>0 | 0.81521 | 2.37791 | 0.02865 | 5.32666 | 5.91755 | 2.35873 | 1.14089 | 0.8992201 | 2.37791 | pk | 1.1240251 | 0.028646 | pv |
| PF07_0015 | PKH_010240 | PVX_087750 | PY01948 | PBANKA_080<br>190 | PCHAS_08022<br>0 | 2.00819 | 1.95362 | 2.25772 | 2.33047 | 2.474   | 2.11183 | 0.16476 | 0.1252749 | 2.474   | pb | 0.1565937 | 2.111827 | pc |

|           |            |            |         |               |              |         |         |         |         |         |         |         |           |         |    |           |          |    |
|-----------|------------|------------|---------|---------------|--------------|---------|---------|---------|---------|---------|---------|---------|-----------|---------|----|-----------|----------|----|
| PF07_0016 | PKH_010250 | PVX_087755 | PY01947 | PBANKA_080200 | PCHAS_080230 | 4.81732 | 4.94536 | 5.01675 | 4.92729 | 5.25491 | 5.56809 | 0.19163 | 0.1054093 | 5.56809 | pc | 0.0543747 | 5.254906 | pb |
| PF07_0017 | PKH_010260 | PVX_087760 | PY01946 | PBANKA_080210 | PCHAS_080240 | 4.26525 | 3.8422  | 5.52531 | 2.31969 | 2.07691 | 4.49578 | 1.00792 | 0.8728875 | 5.52531 | pv | 0.710482  | 2.319694 | py |
| PF07_0019 | PKH_010330 | PVX_087785 | PY06024 | PBANKA_080250 | PCHAS_080280 | 5.47236 | 5.6748  | 5.42864 | 5.42353 | 6.00602 | 5.74724 | 0.18392 | 0.1139727 | 6.00602 | pb | 0.0737459 | 5.747238 | pc |
| PF07_0020 | PKH_010350 | PVX_087795 | PY04146 | PBANKA_080270 | PCHAS_080300 | 1.81183 | 2.69411 | 1.17877 | 2.35917 | 1.72592 | 1.69675 | 0.37728 | 0.2590966 | 2.69411 | pk | 0.1870836 | 1.178772 | pv |
| PF07_0021 | PKH_010360 | PVX_087800 | PY01051 | PBANKA_080280 | PCHAS_080310 | 5.40859 | 4.26178 | 5.75026 | 4.55441 | 5.9401  | 5.69232 | 0.52632 | 0.3454718 | 4.26178 | pk | 0.4173535 | 5.750262 | pv |
| PF07_0023 | PKH_010390 | PVX_087810 | PY03236 | PBANKA_080310 | PCHAS_080340 | 4.43116 | 4.46948 | 4.89393 | 3.48253 | 4.06653 | 4.79506 | 0.36304 | 0.2382599 | 3.48253 | py | 0.197087  | 4.066533 | pb |
| PF07_0024 | PKH_010400 | PVX_087815 | PY03237 | PBANKA_080320 | PCHAS_080350 | 6.08454 | 5.00995 | 4.72673 | 3.49975 | 2.38153 | 3.83845 | 1.01692 | 0.7512584 | 2.38153 | pb | 0.7170026 | 3.838447 | pc |
| PF07_0025 | PKH_010570 | PVX_087905 | PY00140 | PBANKA_080480 | PCHAS_080510 | 1.13824 | 3.67097 | 2.94276 | 4.87219 | 3.12084 | 2.97176 | 0.76854 | 0.5257283 | 1.13824 | pf | 0.5196277 | 3.670968 | pk |
| PF07_0026 | PKH_010580 | PVX_087910 | PY00139 | PBANKA_080490 | PCHAS_080520 | 0.03613 | 4.97746 | 5.33972 | 6.08829 | 1.91342 | 2.02162 | 1.06921 | 0.8397485 | 2.02162 | pc | 0.5226063 | 1.913417 | pb |
| PF07_0028 | PKH_010630 | PVX_087940 | PY00133 | PBANKA_080550 | PCHAS_080580 | 1.13676 | 3.25214 | 6.00767 | 4.18641 | 1.62873 | 2.61364 | 1.26037 | 0.934611  | 6.00767 | pv | 0.7750736 | 4.186405 | py |
| PF07_0030 | PKH_010660 | PVX_087955 | PY05066 | PBANKA_121900 | PCHAS_121970 | 2.30299 | 2.58002 | 2.37049 | 2.49211 | 2.93356 | 1.64508 | 0.28119 | 0.1680217 | 1.64508 | pc | 0.0996642 | 2.933562 | pb |
| PF07_0032 | PKH_010680 | PVX_087965 | PY05064 | PBANKA_121920 | PCHAS_121990 | 4.76208 | 4.27959 | 3.81224 | 5.10217 | 4.59975 | 4.48364 | 0.31475 | 0.2202033 | 3.81224 | pv | 0.149648  | 5.102171 | py |
| PF07_0033 | PKH_010690 | PVX_087970 | PY05063 | PBANKA_121930 | PCHAS_122000 | 2.51827 | 3.01419 | 2.25028 | 2.57168 | 3.09352 | 2.63806 | 0.23426 | 0.2035521 | 2.25028 | pv | 0.2378457 | 2.571685 | py |
| PF07_0034 | PKH_010700 | PVX_087975 | PY05062 | PBANKA_121940 | PCHAS_122010 | 1.54144 | 2.82397 | 3.68872 | 0.86818 | 3.24833 | 1.18082 | 1.02843 | 0.8046617 | 3.68872 | pv | 0.8375126 | 0.868182 | py |
| PF07_0035 | PKH_010720 | PVX_087985 | PY05060 | PBANKA_121960 | PCHAS_122030 | 4.22721 | 3.9927  | 2.31565 | 2.42083 | 2.26214 | 2.21796 | 0.64083 | 0.3866888 | 4.22721 | pf | 0.0640982 | 3.992704 | pk |
| PF07_0042 | PKH_010840 | PVX_088045 | PY04691 | PBANKA_122080 | PCHAS_122150 | 4.20994 | 6.05012 | 5.36607 | 3.97234 | 5.05952 | 5.34597 | 0.58673 | 0.5059512 | 6.05012 | pk | 0.555802  | 5.366071 | pv |
| PF07_0043 | PKH_010880 | PVX_088065 | PY04861 | PBANKA_122120 | PCHAS_122190 | 2.37544 | 2.97382 | 2.54607 | 4.10429 | 2.66519 | 1.8607  | 0.49351 | 0.2805734 | 4.10429 | py | 0.3209378 | 2.665186 | pb |
| PF07_0044 | PKH_010890 | PVX_088070 | PY04862 | PBANKA_122130 | PCHAS_122200 | 1.67607 | 1.73553 | 2.59129 | 1.92007 | 0.45133 | 5.52937 | 0.81222 | 0.4767917 | 5.52937 | pc | 0.3820512 | 2.591289 | pv |
| PF07_0046 | PKH_010910 | PVX_088080 | PY05786 | PBANKA_122150 | PCHAS_122220 | 2.22941 | 3.25202 | 2.74523 | 4.65037 | 5.46022 | 0.62012 | 1.29464 | 1.0105727 | 5.46022 | pb | 0.7319392 | 0.620122 | pc |
| PF07_0052 | PKH_142110 | PVX_122915 | PY06753 | PBANKA_142040 | PCHAS_142220 | 5.57443 | 5.50342 | 5.71805 | 3.59268 | 3.61989 | 4.25887 | 0.88741 | 0.6827427 | 3.59268 | py | 0.3825467 | 3.61989  | pb |
| PF07_0053 | PKH_142120 | PVX_122920 | PY04903 | PBANKA_142050 | PCHAS_142230 | 2.58557 | 1.87719 | 2.43454 | 1.7338  | 0.74459 | 1.81827 | 0.43344 | 0.29361   | 0.74459 | pb | 0.3522822 | 1.818266 | pc |
| PF07_0054 | PKH_142130 | PVX_122930 | PY02616 | PBANKA_142060 | PCHAS_142240 | 5.06432 | 5.80427 | 5.07841 | 5.39401 | 5.11397 | 5.49515 | 0.23945 | 0.1492864 | 5.80427 | pk | 0.1777156 | 5.078405 | pv |

|           |            |            |         |               |              |         |         |         |         |         |         |         |           |         |    |           |          |    |
|-----------|------------|------------|---------|---------------|--------------|---------|---------|---------|---------|---------|---------|---------|-----------|---------|----|-----------|----------|----|
| PF07_0056 | PKH_142150 | PVX_122940 | PY02618 | PBANKA_142080 | PCHAS_142260 | 5.68014 | 5.6707  | 5.29128 | 1.43578 | 0.6517  | 0.20357 | 0.74975 | 0.491932  | 1.43578 | py | 0.3012282 | 0.651698 | pb |
| PF07_0057 | PKH_142180 | PVX_122950 | PY01302 | PBANKA_142110 | PCHAS_142290 | 2.78905 | 2.69701 | 3.75189 | 0.04104 | 3.21654 | 2.53949 | 0.74666 | 0.3463855 | 0.04104 | py | 0.3261094 | 3.216544 | pb |
| PF07_0058 | PKH_142190 | PVX_122955 | PY01301 | PBANKA_142120 | PCHAS_142300 | 1.55144 | 3.93843 | 5.16768 | 2.21509 | 3.63334 | 1.90166 | 1.17854 | 0.823734  | 5.16768 | pv | 1.0296674 | 2.215089 | py |
| PF07_0059 | PKH_142210 | PVX_122960 | PY01300 | PBANKA_142130 | PCHAS_142310 | 1.77365 | 2.29497 | 2.85536 | 4.51754 | 2.26554 | 1.77187 | 0.6428  | 0.3209636 | 4.51754 | py | 0.4012045 | 2.265543 | pb |
| PF07_0062 | PKH_142270 | PVX_122985 | PY02880 | PBANKA_142190 | PCHAS_142370 | 3.93046 | 3.13273 | 2.68408 | 2.90551 | 3.39776 | 4.53281 | 0.52312 | 0.3477265 | 4.53281 | pc | 0.3224939 | 2.684076 | pv |
| PF07_0063 | PKH_142280 | PVX_122990 | PY02881 | PBANKA_142200 | PCHAS_142380 | 3.87318 | 4.25642 | 3.131   | 5.16809 | 3.48272 | 4.22055 | 0.52636 | 0.3726488 | 5.16809 | py | 0.3681964 | 3.482724 | pb |
| PF07_0065 | PKH_142300 | PVX_123000 | PY07157 | PBANKA_142220 | PCHAS_142400 | 4.20676 | 2.76125 | 3.60764 | 3.41618 | 2.96727 | 3.7699  | 0.4066  | 0.3298026 | 4.20676 | pf | 0.2485202 | 2.761252 | pk |
| PF07_0066 | PKH_030250 | PVX_000625 | PY01028 | PBANKA_061370 | PCHAS_061540 | 2.23206 | 2.92512 | 1.81012 | 0.30714 | 0.58838 | 2.22129 | 0.7788  | 0.5517342 | 0.30714 | py | 0.2814398 | 0.588382 | pb |
| PF07_0067 | PKH_030240 | PVX_000620 | PY01027 | PBANKA_061380 | PCHAS_061550 | 1.64851 | 1.69287 | 2.12189 | 0.13203 | 0.37387 | 3.21957 | 0.81332 | 0.6617712 | 3.21957 | pc | 0.4480931 | 0.132029 | py |
| PF07_0068 | PKH_030200 | PVX_000600 | PY06105 | PBANKA_061430 | PCHAS_061600 | 3.2409  | 2.9707  | 3.23205 | 1.05431 | 4.43194 | 5.56074 | 0.99609 | 0.7579848 | 1.05431 | py | 0.6497207 | 4.431943 | pb |
| PF07_0070 | PKH_030160 | PVX_000585 | PY00596 | PBANKA_061460 | PCHAS_061630 | 2.9712  | 6.16095 | 1.08734 | 6.28118 | 2.74331 | 4.90463 | 1.38411 | 1.0662885 | 2.9712  | pf | 1.3028043 | 6.16095  | pk |
| PF07_0071 | PKH_030090 | PVX_000560 | PY00825 | PBANKA_061510 | PCHAS_061680 | 1.30987 | 2.06729 | 3.05011 | 1.48712 | 0.91873 | 1.35454 | 0.50356 | 0.2651599 | 3.05011 | pv | 0.2983055 | 1.487116 | py |
| PF07_0072 | PKH_030080 | PVX_000555 | PY03298 | PBANKA_061520 | PCHAS_061690 | 5.62578 | 0.41387 | 5.94555 | 1.80028 | 5.93038 | 5.12654 | 0.6739  | 0.3780568 | 1.80028 | py | 0.472571  | 5.930383 | pb |
| PF07_0073 | PKH_030060 | PVX_000545 | PY03295 | PBANKA_061540 | PCHAS_061710 | 2.71443 | 0.85357 | 3.10247 | 2.77333 | 2.9048  | 2.37947 | 0.47219 | 0.1826758 | 0.85357 | pk | 0.1460588 | 3.102472 | pv |
| PF07_0074 | PKH_030050 | PVX_000540 | PY03294 | PBANKA_061550 | PCHAS_061720 | 3.1423  | 0.27733 | 0.56365 | 2.02175 | 3.01616 | 2.25392 | 0.92494 | 0.7146118 | 0.27733 | pk | 0.4706988 | 0.563653 | pv |
| PF07_0077 | PKH_031310 | PVX_096355 | PY02457 | PBANKA_061680 | PCHAS_061850 | 2.35447 | 3.14168 | 2.57139 | 4.52902 | 3.06761 | 2.463   | 0.55824 | 0.2783639 | 4.52902 | py | 0.2239005 | 3.067613 | pb |
| PF07_0078 | PKH_031330 | PVX_096345 | PY02459 | PBANKA_061700 | PCHAS_061870 | 4.84033 | 5.76714 | 5.56927 | 5.98004 | 0.59252 | 2.41626 | 0.89641 | 0.4892282 | 2.41626 | pc | 0.3798322 | 4.840331 | pf |
| PF07_0081 | PKH_031360 | PVX_096330 | PY02463 | PBANKA_061730 | PCHAS_061900 | 3.2827  | 4.41104 | 3.25722 | 3.09843 | 4.19989 | 2.07146 | 0.57775 | 0.4510549 | 2.07146 | pc | 0.2817342 | 4.411037 | pk |
| PF07_0082 | PKH_031370 | PVX_096325 | PY02464 | PBANKA_061740 | PCHAS_061910 | 2.31833 | 4.09315 | 2.26561 | 5.24053 | 3.25019 | 2.56253 | 0.90623 | 0.55188   | 5.24053 | py | 0.5179356 | 3.250192 | pb |
| PF07_0083 | PKH_031390 | PVX_096315 | PY00333 | PBANKA_061760 | PCHAS_061930 | 1.26396 | 1.3939  | 2.52375 | 0.15884 | 0.25683 | 0.75746 | 0.66808 | 0.448436  | 2.52375 | pv | 0.4108914 | 0.158841 | py |
| PF07_0085 | PKH_031420 | PVX_096305 | PY01431 | PBANKA_061790 | PCHAS_061960 | 2.70036 | 1.84895 | 3.07191 | 6.09947 | 2.42081 | 1.94797 | 0.76331 | 0.3950712 | 6.09947 | py | 0.493839  | 2.420812 | pb |
| PF07_0087 | PKH_031490 | PVX_096280 | PY01731 | PBANKA_061860 | PCHAS_062030 | 3.84092 | 3.57584 | 3.22622 | 3.63683 | 3.72662 | 3.95108 | 0.17996 | 0.1158667 | 3.22622 | pv | 0.1223858 | 3.636831 | py |



|           |            |            |         |                   |                  |         |         |         |         |         |         |         |           |         |    |           |          |    |
|-----------|------------|------------|---------|-------------------|------------------|---------|---------|---------|---------|---------|---------|---------|-----------|---------|----|-----------|----------|----|
| PF07_0088 | PKH_031540 | PVX_096265 | PY06068 | PBANKA_061<br>910 | PCHAS_06208<br>0 | 2.52551 | 2.36257 | 2.58781 | 2.10733 | 2.84192 | 1.5151  | 0.32837 | 0.1919648 | 1.5151  | pc | 0.1608545 | 2.841917 | pb |
| PF07_0089 | PKH_031550 | PVX_096260 | PY02842 | PBANKA_061<br>920 | PCHAS_06209<br>0 | 1.24766 | 3.57736 | 6.27345 | 5.22889 | 0.26151 | 4.51038 | 1.17206 | 0.8672556 | 3.57736 | pk | 1.0840695 | 6.273446 | pv |
| PF07_0091 | PKH_031620 | PVX_096230 | PY02267 | PBANKA_062<br>000 | PCHAS_06217<br>0 | 1.7092  | 0.68216 | 4.78805 | 1.46659 | 1.1473  | 3.00167 | 0.97386 | 0.5762819 | 4.78805 | pv | 0.7203524 | 1.466594 | py |
| PF07_0092 | PKH_031630 | PVX_096225 | PY02268 | PBANKA_062<br>010 | PCHAS_06218<br>0 | 1.52182 | 1.08019 | 2.12725 | 0.50367 | 6.07601 | 1.62096 | 0.64889 | 0.4328693 | 6.07601 | pb | 0.5163008 | 1.620963 | pc |
| PF07_0095 | PKH_031670 | PVX_096205 | PY02052 | PBANKA_062<br>050 | PCHAS_06222<br>0 | 1.68842 | 2.73908 | 2.10782 | 3.46451 | 3.16072 | 2.16047 | 0.56793 | 0.420712  | 3.46451 | py | 0.2758273 | 3.16072  | pb |
| PF07_0097 | PKH_031710 | PVX_096180 | PY02048 | PBANKA_062<br>090 | PCHAS_06226<br>0 | 1.59306 | 1.25188 | 2.62408 | 2.31262 | 0.66408 | 1.9296  | 0.55955 | 0.4183512 | 0.66408 | pb | 0.522939  | 1.929596 | pc |
| PF07_0098 | PKH_031720 | PVX_096175 | PY02047 | PBANKA_062<br>100 | PCHAS_06227<br>0 | 1.7371  | 3.78784 | 0.07807 | 5.71656 | 4.64017 | 1.20753 | 1.28795 | 1.0308552 | 3.78784 | pk | 1.288569  | 0.078066 | pv |
| PF07_0099 | PKH_031730 | PVX_096170 | PY05504 | PBANKA_062<br>110 | PCHAS_06228<br>0 | 1.79836 | 2.61476 | 2.5347  | 2.38365 | 4.35622 | 1.03885 | 0.71414 | 0.4624509 | 4.35622 | pb | 0.2418635 | 1.038849 | pc |
| PF07_0101 | PKH_031750 | PVX_096155 | PY00052 | PBANKA_062<br>130 | PCHAS_06230<br>0 | 4.68543 | 5.33308 | 4.88168 | 5.4803  | 6.07714 | 2.89533 | 0.73802 | 0.3980685 | 2.89533 | pc | 0.3115696 | 6.077143 | pb |
| PF07_0102 | PKH_031790 | PVX_096135 | PY01610 | PBANKA_062<br>170 | PCHAS_06234<br>0 | 2.0655  | 2.54997 | 2.23917 | 2.36305 | 3.12698 | 2.9571  | 0.32772 | 0.2404804 | 3.12698 | pb | 0.1520886 | 2.957097 | pc |
| PF07_0103 | PKH_031810 | PVX_096125 | PY01612 | PBANKA_062<br>190 | PCHAS_06236<br>0 | 1.48497 | 1.00011 | 1.45579 | 1.42349 | 1.99806 | 1.3469  | 0.19472 | 0.1187485 | 1.99806 | pb | 0.1292889 | 1.346904 | pc |
| PF07_0104 | PKH_031860 | PVX_096095 | PY00879 | PBANKA_062<br>240 | PCHAS_06241<br>0 | 6.1893  | 2.95666 | 0.69171 | 4.97415 | 0.42926 | 5.78315 | 0.99677 | 0.5860095 | 2.95666 | pk | 0.5361108 | 0.691715 | pv |
| PF07_0105 | PKH_031870 | PVX_096090 | PY00878 | PBANKA_062<br>250 | PCHAS_06242<br>0 | 4.0048  | 4.2649  | 4.38419 | 2.87634 | 4.73514 | 5.45738 | 0.57178 | 0.3845645 | 2.87634 | py | 0.3929671 | 4.735145 | pb |
| PF07_0106 | PKH_031900 | PVX_096075 | PY03677 | PBANKA_062<br>280 | PCHAS_06245<br>0 | 1.54605 | 1.35829 | 1.95888 | 2.45641 | 1.87471 | 1.48237 | 0.31721 | 0.1985866 | 2.45641 | py | 0.1660689 | 1.874712 | pb |
| PF07_0108 | PKH_021100 | PVX_081635 | PY02527 | PBANKA_021<br>070 | PCHAS_02091<br>0 | 4.72195 | 4.58559 | 4.50076 | 0.04118 | 3.01795 | 3.91931 | 0.69898 | 0.4740552 | 0.04118 | py | 0.2218659 | 3.017947 | pb |
| PF07_0110 | PKH_021130 | PVX_081650 | PY02099 | PBANKA_021<br>100 | PCHAS_02094<br>0 | 2.96858 | 2.62865 | 2.34425 | 3.46054 | 1.97928 | 0.76138 | 0.66214 | 0.4211167 | 0.76138 | pc | 0.3184238 | 3.460542 | py |
| PF07_0111 | PKH_021140 | PVX_081655 | PY02098 | PBANKA_021<br>110 | PCHAS_02095<br>0 | 2.99788 | 3.57847 | 5.09897 | 4.60964 | 3.16495 | 6.10231 | 1.0116  | 0.7091548 | 6.10231 | pc | 0.7412959 | 2.997884 | pf |
| PF07_0112 | PKH_021180 | PVX_081675 | PY02094 | PBANKA_021<br>150 | PCHAS_02099<br>0 | 3.66875 | 3.84028 | 3.13322 | 2.24947 | 3.30322 | 3.51518 | 0.38972 | 0.2145169 | 2.24947 | py | 0.2151566 | 3.303224 | pb |
| PF07_0113 | PKH_021190 | PVX_081680 | PY02093 | PBANKA_021<br>160 | PCHAS_02100<br>0 | 3.79298 | 3.74117 | 3.85033 | 5.23724 | 2.63538 | 4.13877 | 0.50947 | 0.322508  | 5.23724 | py | 0.1137365 | 2.635385 | pb |
| PF07_0114 | PKH_021210 | PVX_081690 | PY01290 | PBANKA_021<br>180 | PCHAS_02102<br>0 | 4.14325 | 3.07405 | 2.92195 | 1.75309 | 4.00757 | 1.15893 | 0.89848 | 0.6951558 | 1.15893 | pc | 0.6016435 | 4.143252 | pf |
| PF07_0115 | PKH_021220 | PVX_081695 | PY01447 | PBANKA_021<br>190 | PCHAS_02103<br>0 | 2.65152 | 3.27858 | 3.57903 | 3.06314 | 4.68609 | 5.85988 | 0.85529 | 0.5100921 | 5.85988 | pc | 0.2857375 | 4.68609  | pb |
| PF07_0116 | PKH_021230 | PVX_081700 | PY00092 | PBANKA_021<br>200 | PCHAS_02104<br>0 | 1.02746 | 0.16807 | 5.12954 | 1.08452 | 5.58423 | 0.70788 | 0.75073 | 0.5285753 | 5.12954 | pv | 0.566558  | 1.084524 | py |

|           |            |            |         |                   |                  |         |         |         |         |         |         |         |           |         |    |           |          |    |
|-----------|------------|------------|---------|-------------------|------------------|---------|---------|---------|---------|---------|---------|---------|-----------|---------|----|-----------|----------|----|
| PF07_0117 | PKH_021240 | PVX_081705 | PY00093 | PBANKA_021<br>210 | PCHAS_02105<br>0 | 2.84949 | 2.5602  | 2.68945 | 2.97187 | 2.80253 | 1.68569 | 0.28143 | 0.1143433 | 1.68569 | pc | 0.1005924 | 2.971875 | py |
| PF07_0119 | PKH_021270 | PVX_081715 | PY01308 | PBANKA_021<br>240 | PCHAS_02108<br>0 | 3.64581 | 3.3482  | 3.42385 | 4.15939 | 3.47628 | 3.0943  | 0.23585 | 0.1359164 | 4.15939 | py | 0.1567878 | 3.476277 | pb |
| PF07_0120 | PKH_021350 | PVX_081755 | PY01476 | PBANKA_021<br>320 | PCHAS_02116<br>0 | 4.06163 | 4.50692 | 5.28283 | 1.96312 | 4.80551 | 4.87743 | 0.73902 | 0.3183419 | 1.96312 | py | 0.3979274 | 4.805508 | pb |
| PF07_0122 | PKH_021380 | PVX_081770 | PY01473 | PBANKA_021<br>350 | PCHAS_02119<br>0 | 1.78661 | 1.85396 | 2.0126  | 1.34012 | 0.72878 | 1.19177 | 0.39875 | 0.2669336 | 0.72878 | pb | 0.1849594 | 1.191774 | pc |
| PF08_0006 | PKH_050160 | PVX_088890 | PY07166 | PBANKA_070<br>150 | PCHAS_09365<br>0 | 2.81559 | 2.48365 | 2.10138 | 5.90162 | 2.79057 | 3.09896 | 0.74009 | 0.2659031 | 5.90162 | py | 0.3323788 | 2.790574 | pb |
| PF08_0008 | PKH_050210 | PVX_088910 | PY07130 | PBANKA_070<br>190 | PCHAS_09361<br>0 | 6.20863 | 6.1312  | 6.03428 | 4.41931 | 5.83734 | 5.97083 | 0.35777 | 0.106334  | 4.41931 | py | 0.083683  | 5.837338 | pb |
| PF08_0009 | PKH_050240 | PVX_088930 | PY07384 | PBANKA_070<br>220 | PCHAS_09358<br>0 | 4.44172 | 3.51326 | 2.89287 | 3.20579 | 2.95848 | 1.84869 | 0.57679 | 0.395499  | 4.44172 | pf | 0.3556782 | 3.513263 | pk |
| PF08_0010 | PKH_050260 | PVX_088940 | PY05779 | PBANKA_070<br>240 | PCHAS_09356<br>0 | 2.668   | 3.92165 | 5.60822 | 6.1189  | 5.3538  | 5.09621 | 0.89918 | 0.5418527 | 2.668   | pf | 0.3192789 | 3.921652 | pk |
| PF08_0011 | PKH_050270 | PVX_088945 | PY05778 | PBANKA_070<br>250 | PCHAS_09355<br>0 | 3.09003 | 2.93841 | 2.35799 | 2.51496 | 2.19309 | 2.64749 | 0.26832 | 0.2069664 | 3.09003 | pf | 0.1528449 | 2.93841  | pk |
| PF08_0012 | PKH_050310 | PVX_088965 | PY00637 | PBANKA_070<br>290 | PCHAS_09351<br>0 | 4.7399  | 4.87003 | 5.2958  | 5.57328 | 0.50956 | 5.88635 | 0.55777 | 0.3699397 | 0.50956 | pb | 0.3147868 | 5.886353 | pc |
| PF08_0014 | PKH_050340 | PVX_088985 | PY04436 | PBANKA_070<br>320 | PCHAS_09348<br>0 | 4.06486 | 3.15256 | 3.63508 | 3.00303 | 3.64214 | 3.62158 | 0.26082 | 0.2243258 | 4.06486 | pf | 0.1631508 | 3.152555 | pk |
| PF08_0018 | PKH_050380 | PVX_089010 | PY06191 | PBANKA_070<br>360 | PCHAS_09344<br>0 | 2.66124 | 1.78127 | 2.57869 | 2.39303 | 1.55995 | 2.257   | 0.33912 | 0.2403308 | 1.55995 | pb | 0.2664052 | 2.257    | pc |
| PF08_0019 | PKH_050410 | PVX_089025 | PY00516 | PBANKA_070<br>390 | PCHAS_09341<br>0 | 2.35435 | 2.56908 | 2.34389 | 0.24039 | 2.51704 | 3.12923 | 0.54612 | 0.2000147 | 0.24039 | py | 0.2500184 | 2.517042 | pb |
| PF08_0020 | PKH_050430 | PVX_089035 | PY00518 | PBANKA_070<br>410 | PCHAS_09339<br>0 | 3.72206 | 5.10789 | 4.94555 | 4.45473 | 1.00558 | 2.62131 | 1.09069 | 0.7420147 | 1.00558 | pb | 0.4691641 | 2.621312 | pc |
| PF08_0021 | PKH_050450 | PVX_089045 | PY05573 | PBANKA_070<br>430 | PCHAS_09337<br>0 | 4.34375 | 4.27238 | 5.49993 | 4.46798 | 3.8264  | 4.80629 | 0.38861 | 0.2350983 | 5.49993 | pv | 0.2628153 | 4.467978 | py |
| PF08_0022 | PKH_050460 | PVX_089050 | PY05572 | PBANKA_070<br>440 | PCHAS_09336<br>0 | 5.58058 | 3.54153 | 4.24113 | 2.10708 | 4.49028 | 5.33425 | 0.91923 | 0.6264333 | 2.10708 | py | 0.7830417 | 4.49028  | pb |
| PF08_0023 | PKH_050490 | PVX_089065 | PY01032 | PBANKA_070<br>470 | PCHAS_09333<br>0 | 1.28819 | 3.02251 | 1.1218  | 0.65415 | 6.13063 | 1.52046 | 0.7013  | 0.4614123 | 3.02251 | pk | 0.5767654 | 1.121795 | pv |
| PF08_0026 | PKH_050550 | PVX_089085 | PY01886 | PBANKA_070<br>510 | PCHAS_09329<br>0 | 1.44774 | 1.69164 | 2.25176 | 2.39809 | 0.66962 | 1.59297 | 0.43853 | 0.3218276 | 0.66962 | pb | 0.3776174 | 1.592971 | pc |
| PF08_0027 | PKH_050610 | PVX_089115 | PY03121 | PBANKA_070<br>570 | PCHAS_07150<br>0 | 1.73496 | 2.4902  | 1.54378 | 0.07902 | 1.76777 | 1.40718 | 0.49383 | 0.2614034 | 0.07902 | py | 0.3185516 | 1.767772 | pb |
| PF08_0028 | PKH_050620 | PVX_089120 | PY03123 | PBANKA_070<br>580 | PCHAS_07151<br>0 | 2.09017 | 1.52922 | 2.47801 | 2.20229 | 3.15056 | 2.33556 | 0.35708 | 0.2388365 | 3.15056 | pb | 0.2652275 | 2.335561 | pc |
| PF08_0031 | PKH_050710 | PVX_089165 | PY02084 | PBANKA_070<br>670 | PCHAS_07160<br>0 | 3.11008 | 3.64769 | 2.30146 | 2.85037 | 0.78924 | 4.70142 | 0.91969 | 0.6394555 | 0.78924 | pb | 0.4014842 | 4.701418 | pc |
| PF08_0032 | PKH_050720 | PVX_089170 | PY04500 | PBANKA_070<br>680 | PCHAS_07161<br>0 | 3.483   | 3.81615 | 3.88776 | 2.67356 | 3.16716 | 4.27396 | 0.44236 | 0.3023138 | 2.67356 | py | 0.2156434 | 3.167156 | pb |



|           |            |            |         |                   |                  |         |         |         |         |         |         |         |           |         |    |           |          |    |
|-----------|------------|------------|---------|-------------------|------------------|---------|---------|---------|---------|---------|---------|---------|-----------|---------|----|-----------|----------|----|
| PF08_0033 | PKH_050750 | PVX_089185 | PY04502 | PBANKA_070<br>710 | PCHAS_07164<br>0 | 5.64104 | 3.75619 | 0.69311 | 0.01578 | 6.24502 | 3.99404 | 1.0215  | 0.7280359 | 3.75619 | pk | 0.7272266 | 0.693111 | pv |
| PF08_0034 | PKH_050770 | PVX_089200 | PY02679 | PBANKA_070<br>730 | PCHAS_07166<br>0 | 3.14447 | 3.95447 | 3.71595 | 1.99163 | 0.49333 | 2.60322 | 0.95445 | 0.6151136 | 0.49333 | pb | 0.6335811 | 2.603222 | pc |
| PF08_0035 | PKH_050810 | PVX_089220 | PY02500 | PBANKA_070<br>770 | PCHAS_07170<br>0 | 5.98801 | 0.08607 | 5.95405 | 0.0051  | 5.7273  | 5.93541 | 0.17146 | 0.1227165 | 0.08607 | pk | 0.1533956 | 5.954052 | pv |
| PF08_0036 | PKH_050840 | PVX_089235 | PY02497 | PBANKA_070<br>800 | PCHAS_07173<br>0 | 0.02527 | 4.71025 | 3.72037 | 5.28364 | 2.51082 | 0.12107 | 1.17582 | 0.8564156 | 2.51082 | pb | 0.7903679 | 0.121066 | pc |
| PF08_0037 | PKH_050890 | PVX_089260 | PY04243 | PBANKA_070<br>870 | PCHAS_07178<br>0 | 2.09975 | 1.35554 | 2.66002 | 3.08688 | 2.79901 | 4.99178 | 0.79373 | 0.4861189 | 4.99178 | pc | 0.281527  | 1.355537 | pk |
| PF08_0038 | PKH_050900 | PVX_089265 | PY04244 | PBANKA_070<br>880 | PCHAS_07179<br>0 | 3.7458  | 3.6654  | 2.61327 | 0.65832 | 2.3683  | 3.50831 | 0.87993 | 0.4859243 | 0.65832 | py | 0.3224043 | 2.368304 | pb |
| PF08_0039 | PKH_050930 | PVX_089280 | PY04247 | PBANKA_070<br>910 | PCHAS_07182<br>0 | 2.32528 | 2.28823 | 2.4448  | 2.30135 | 2.78008 | 2.15166 | 0.13482 | 0.0660396 | 2.78008 | pb | 0.0451265 | 2.15166  | pc |
| PF08_0040 | PKH_050940 | PVX_089285 | PY04248 | PBANKA_070<br>920 | PCHAS_07183<br>0 | 1.66039 | 2.91843 | 2.47213 | 1.55272 | 2.76337 | 0.37549 | 0.76089 | 0.4937378 | 0.37549 | pc | 0.5055975 | 2.918432 | pk |
| PF08_0043 | PKH_050980 | PVX_089300 | PY03687 | PBANKA_070<br>960 | PCHAS_07187<br>0 | 2.17016 | 3.89577 | 4.25913 | 5.77546 | 2.13942 | 1.32974 | 1.22727 | 0.9371479 | 5.77546 | py | 1.1637517 | 2.139422 | pb |
| PF08_0044 | PKH_050990 | PVX_089305 | PY05890 | PBANKA_070<br>970 | PCHAS_07188<br>0 | 0.90186 | 6.05991 | 0.16026 | 4.82425 | 6.23237 | 5.05483 | 0.65364 | 0.5593473 | 0.90186 | pf | 0.6991841 | 6.059913 | pk |
| PF08_0048 | PKH_051120 | PVX_089365 | PY01180 | PBANKA_071<br>080 | PCHAS_07199<br>0 | 2.22494 | 3.19953 | 3.57943 | 2.25972 | 2.90316 | 2.50859 | 0.44815 | 0.3236063 | 3.57943 | pv | 0.3422905 | 2.259722 | py |
| PF08_0049 | PKH_051130 | PVX_089370 | PY03069 | PBANKA_071<br>090 | PCHAS_07200<br>0 | 2.51169 | 3.08648 | 2.20929 | 6.2417  | 3.80469 | 1.51023 | 0.95414 | 0.6343279 | 6.2417  | py | 0.4696605 | 3.80469  | pb |
| PF08_0054 | PKH_051230 | PVX_089425 | PY06158 | PBANKA_071<br>190 | PCHAS_07210<br>0 | 2.58752 | 3.00359 | 2.73699 | 2.40023 | 2.9277  | 2.01179 | 0.27812 | 0.1887089 | 2.01179 | pc | 0.1692361 | 3.00359  | pk |
| PF08_0055 | PKH_051240 | PVX_089430 | PY03839 | PBANKA_071<br>200 | PCHAS_07211<br>0 | 1.32929 | 1.19294 | 1.88967 | 0.0998  | 0.40356 | 0.60388 | 0.55078 | 0.4037751 | 1.88967 | pv | 0.3786988 | 0.099797 | py |
| PF08_0056 | PKH_051330 | PVX_089490 | PY00088 | PBANKA_071<br>230 | PCHAS_07214<br>0 | 0.34191 | 5.88609 | 5.21117 | 4.73885 | 6.17826 | 0.9157  | 0.69436 | 0.5453443 | 4.73885 | py | 0.6816804 | 6.17826  | pb |
| PF08_0058 | PKH_051430 | PVX_089535 | PY05167 | PBANKA_071<br>320 | PCHAS_07223<br>0 | 5.81913 | 6.02511 | 6.14844 | 5.94691 | 5.78235 | 5.92232 | 0.09945 | 0.0741097 | 6.14844 | pv | 0.0864881 | 5.946912 | py |
| PF08_0062 | PKH_051560 | PVX_089565 | PY05592 | PBANKA_071<br>390 | PCHAS_07230<br>0 | 2.33067 | 4.29954 | 5.69237 | 4.30722 | 4.791   | 5.74345 | 0.88156 | 0.5658108 | 2.33067 | pf | 0.5843986 | 4.299538 | pk |
| PF08_0063 | PKH_051590 | PVX_089580 | PY00565 | PBANKA_071<br>420 | PCHAS_07233<br>0 | 3.11741 | 3.00344 | 2.69899 | 2.31926 | 3.05505 | 2.47429 | 0.28056 | 0.1998371 | 2.31926 | py | 0.2368942 | 3.055051 | pb |
| PF08_0065 | PKH_051650 | PVX_089605 | PY00572 | PBANKA_071<br>480 | PCHAS_07239<br>0 | 1.25116 | 2.51028 | 2.03037 | 1.37284 | 1.56189 | 1.04767 | 0.40515 | 0.2586866 | 2.51028 | pk | 0.1589741 | 2.030372 | pv |
| PF08_0068 | PKH_142310 | PVX_123005 | PY04441 | PBANKA_142<br>230 | PCHAS_14241<br>0 | 3.9308  | 3.35787 | 3.0743  | 4.99051 | 3.18482 | 2.38802 | 0.60534 | 0.3652687 | 4.99051 | py | 0.4565859 | 3.184821 | pb |
| PF08_0069 | PKH_142320 | PVX_123010 | PY04443 | PBANKA_142<br>240 | PCHAS_14242<br>0 | 2.65613 | 3.17746 | 2.81189 | 2.55192 | 1.91144 | 3.73416 | 0.434   | 0.3051974 | 3.73416 | pc | 0.1953234 | 1.911441 | pb |
| PF08_0071 | PKH_142350 | PVX_123030 | PY05422 | PBANKA_142<br>270 | PCHAS_14245<br>0 | 4.01307 | 6.23747 | 2.42654 | 5.88686 | 2.98348 | 2.11838 | 1.29113 | 0.9847778 | 5.88686 | py | 1.0917375 | 2.983478 | pb |

|           |            |            |         |                   |                  |         |         |         |         |         |         |         |           |         |    |           |          |    |
|-----------|------------|------------|---------|-------------------|------------------|---------|---------|---------|---------|---------|---------|---------|-----------|---------|----|-----------|----------|----|
| PF08_0073 | PKH_142370 | PVX_123040 | PY05340 | PBANKA_142<br>290 | PCHAS_14247<br>0 | 6.02791 | 3.57613 | 0.8502  | 6.12686 | 0.47818 | 5.90001 | 0.75293 | 0.3933662 | 3.57613 | pk | 0.2400748 | 0.850202 | pv |
| PF08_0074 | PKH_142420 | PVX_123060 | PY07825 | PBANKA_142<br>330 | PCHAS_14251<br>0 | 2.1706  | 3.00575 | 2.2854  | 3.1192  | 2.69421 | 2.54354 | 0.30327 | 0.2487922 | 3.1192  | py | 0.2733227 | 2.694211 | pb |
| PF08_0075 | PKH_142440 | PVX_123070 | PY06465 | PBANKA_142<br>350 | PCHAS_14253<br>0 | 2.40012 | 0.47637 | 2.73541 | 2.4113  | 2.7875  | 2.33617 | 0.45359 | 0.157323  | 0.47637 | pk | 0.1156244 | 2.735415 | pv |
| PF08_0076 | PKH_142450 | PVX_123075 | PY06464 | PBANKA_142<br>360 | PCHAS_14254<br>0 | 2.29105 | 2.33597 | 2.41909 | 2.16592 | 2.7161  | 2.29496 | 0.11987 | 0.0596173 | 2.7161  | pb | 0.0745216 | 2.29496  | pc |
| PF08_0080 | PKH_142500 | PVX_123100 | PY00460 | PBANKA_142<br>400 | PCHAS_14258<br>0 | 3.5858  | 1.35902 | 1.35579 | 2.45123 | 3.34205 | 5.06266 | 1.13741 | 0.8426081 | 5.06266 | pc | 0.779402  | 1.355793 | pv |
| PF08_0081 | PKH_142510 | PVX_123105 | PY00458 | PBANKA_142<br>420 | PCHAS_14260<br>0 | 1.67263 | 0.5213  | 4.08421 | 2.76978 | 2.64049 | 1.88028 | 0.90338 | 0.643267  | 4.08421 | pv | 0.5817084 | 2.76978  | py |
| PF08_0083 | PKH_142550 | PVX_123125 | PY03189 | PBANKA_142<br>460 | PCHAS_14264<br>0 | 0.57064 | 0.47311 | 0.08708 | 4.6384  | 0.5377  | 1.99277 | 0.69762 | 0.4006447 | 4.6384  | py | 0.5008058 | 0.537695 | pb |
| PF08_0085 | PKH_142600 | PVX_123140 | PY01792 | PBANKA_142<br>490 | PCHAS_14267<br>0 | 4.08412 | 5.45469 | 0.51416 | 2.29715 | 2.18134 | 0.01883 | 1.33356 | 1.0576307 | 4.08412 | pf | 0.9863743 | 5.45469  | pk |
| PF08_0087 | PKH_142620 | PVX_123150 | PY01795 | PBANKA_142<br>510 | PCHAS_14269<br>0 | 3.18164 | 3.52751 | 3.72703 | 3.72606 | 3.38243 | 4.27686 | 0.27306 | 0.177803  | 4.27686 | pc | 0.1357855 | 3.181638 | pf |
| PF08_0089 | PKH_142650 | PVX_123165 | PY03874 | PBANKA_142<br>540 | PCHAS_14272<br>0 | 3.00948 | 4.90653 | 3.32308 | 2.33655 | 3.02211 | 2.47704 | 0.57144 | 0.306319  | 4.90653 | pk | 0.3044987 | 3.323081 | pv |
| PF08_0091 | PKH_142700 | PVX_123190 | PY04682 | PBANKA_142<br>590 | PCHAS_14277<br>0 | 5.01545 | 6.0207  | 5.59151 | 3.89908 | 6.05351 | 5.57698 | 0.52904 | 0.2963557 | 3.89908 | py | 0.2549449 | 6.053511 | pb |
| PF08_0092 | PKH_142710 | PVX_123195 | PY04681 | PBANKA_142<br>600 | PCHAS_14278<br>0 | 1.64636 | 1.58161 | 1.97826 | 1.97498 | 2.48621 | 1.45137 | 0.29335 | 0.1840521 | 2.48621 | pb | 0.1813163 | 1.451367 | pc |
| PF08_0093 | PKH_142750 | PVX_123215 | PY01172 | PBANKA_142<br>640 | PCHAS_14282<br>0 | 4.38852 | 0.30986 | 4.88414 | 3.97081 | 2.7132  | 3.86561 | 0.88602 | 0.5387711 | 0.30986 | pk | 0.4451317 | 4.884138 | pv |
| PF08_0095 | PKH_142780 | PVX_123230 | PY02226 | PBANKA_142<br>670 | PCHAS_14285<br>0 | 2.69604 | 5.90942 | 2.7995  | 1.39229 | 2.81105 | 1.84593 | 0.90702 | 0.4744643 | 5.90942 | pk | 0.5672153 | 2.7995   | pv |
| PF08_0096 | PKH_142800 | PVX_123240 | PY02224 | PBANKA_142<br>690 | PCHAS_14287<br>0 | 2.42936 | 1.35418 | 2.56808 | 2.44253 | 1.35444 | 1.31338 | 0.56966 | 0.4408653 | 2.56808 | pv | 0.2790595 | 2.442525 | py |
| PF08_0097 | PKH_142820 | PVX_123250 | PY06110 | PBANKA_142<br>710 | PCHAS_14289<br>0 | 2.86511 | 2.59868 | 2.30464 | 3.25617 | 2.89598 | 3.48512 | 0.31147 | 0.2554996 | 2.30464 | pv | 0.2293287 | 3.256167 | py |
| PF08_0098 | PKH_142840 | PVX_123265 | PY01655 | PBANKA_142<br>730 | PCHAS_14291<br>0 | 3.08068 | 2.60908 | 3.64175 | 3.13089 | 2.65816 | 2.0672  | 0.41981 | 0.3010797 | 2.0672  | pc | 0.2360833 | 3.641745 | pv |
| PF08_0099 | PKH_142860 | PVX_123275 | PY01656 | PBANKA_142<br>750 | PCHAS_14293<br>0 | 2.45567 | 0.29187 | 5.95318 | 5.28623 | 3.6263  | 3.16418 | 1.42805 | 1.1239127 | 0.29187 | pk | 0.8231702 | 5.953182 | pv |
| PF08_0100 | PKH_142890 | PVX_123295 | PY01658 | PBANKA_142<br>770 | PCHAS_14295<br>0 | 0.16972 | 0.33707 | 4.43468 | 5.48855 | 5.71812 | 1.02698 | 0.79033 | 0.5447494 | 4.43468 | pv | 0.4398473 | 5.488547 | py |
| PF08_0108 | PKH_011000 | PVX_088125 | PY06692 | PBANKA_122<br>250 | PCHAS_12231<br>0 | 6.20929 | 0.17343 | 6.18178 | 6.13554 | 0.65262 | 5.91527 | 0.22819 | 0.123019  | 0.65262 | pb | 0.0871456 | 5.915265 | pc |
| PF08_0110 | PKH_011100 | PVX_088180 | PY01075 | PBANKA_122<br>330 | PCHAS_12239<br>0 | 3.26217 | 3.01554 | 2.4315  | 2.38215 | 1.88308 | 2.02932 | 0.40244 | 0.3069279 | 3.26217 | pf | 0.2253107 | 3.015542 | pk |
| PF08_0111 | PKH_011120 | PVX_088190 | PY07254 | PBANKA_122<br>350 | PCHAS_12241<br>0 | 2.21605 | 3.24937 | 1.95772 | 0.43945 | 5.98066 | 4.81168 | 1.36374 | 1.0657006 | 4.81168 | pc | 1.0092113 | 3.249375 | pk |

|           |            |            |         |                   |                  |         |         |         |         |         |         |         |           |         |    |           |          |    |
|-----------|------------|------------|---------|-------------------|------------------|---------|---------|---------|---------|---------|---------|---------|-----------|---------|----|-----------|----------|----|
| PF08_0112 | PKH_011140 | PVX_088200 | PY07256 | PBANKA_122<br>370 | PCHAS_12243<br>0 | 3.29143 | 4.37423 | 2.73444 | 4.34769 | 2.0205  | 1.56596 | 0.94874 | 0.7933967 | 1.56596 | pc | 0.7210456 | 4.374233 | pk |
| PF08_0113 | PKH_011150 | PVX_088205 | PY05420 | PBANKA_122<br>380 | PCHAS_12244<br>0 | 6.16331 | 5.79832 | 4.94953 | 3.15705 | 4.55152 | 2.23057 | 1.162   | 0.8506127 | 2.23057 | pc | 0.6151473 | 3.157055 | py |
| PF08_0114 | PKH_011170 | PVX_088215 | PY02868 | PBANKA_122<br>400 | PCHAS_12246<br>0 | 2.23359 | 3.15161 | 1.58468 | 3.4566  | 3.57671 | 2.29756 | 0.67818 | 0.5004323 | 1.58468 | pv | 0.5492928 | 3.456601 | py |
| PF08_0115 | PKH_011190 | PVX_088225 | PY02866 | PBANKA_122<br>420 | PCHAS_12248<br>0 | 6.24473 | 0.36708 | 0.29379 | 1.41994 | 0.65006 | 0.89389 | 0.39024 | 0.2577209 | 1.41994 | py | 0.2514083 | 0.650056 | pb |
| PF08_0117 | PKH_011240 | PVX_088250 | PY05153 | PBANKA_122<br>470 | PCHAS_12253<br>0 | 2.36011 | 2.89155 | 5.857   | 4.2729  | 3.4524  | 2.42343 | 0.98454 | 0.5883526 | 5.857   | pv | 0.3901035 | 4.2729   | py |
| PF08_0120 | PKH_011370 | PVX_093515 | PY00381 | PBANKA_122<br>570 | PCHAS_12263<br>0 | 0.26307 | 6.02892 | 5.04919 | 4.61898 | 4.66401 | 4.42746 | 0.65232 | 0.4063336 | 0.26307 | pf | 0.1666891 | 6.028922 | pk |
| PF08_0121 | PKH_011380 | PVX_093520 | PY00382 | PBANKA_122<br>580 | PCHAS_12264<br>0 | 1.72173 | 2.99911 | 2.12206 | 4.19204 | 3.83665 | 5.18309 | 1.06148 | 0.8369777 | 5.18309 | pc | 0.7268766 | 1.721731 | pf |
| PF08_0125 | PKH_011460 | PVX_093560 | PY00808 | PBANKA_122<br>660 | PCHAS_12272<br>0 | 3.72535 | 4.86653 | 4.31283 | 5.24608 | 3.13626 | 4.08276 | 0.58018 | 0.4609003 | 3.13626 | pb | 0.5186073 | 4.082758 | pc |
| PF08_0126 | PKH_011490 | PVX_093575 | PY00810 | PBANKA_122<br>680 | PCHAS_12274<br>0 | 4.67156 | 5.79081 | 3.92845 | 4.29681 | 4.33796 | 4.63498 | 0.42236 | 0.2162566 | 5.79081 | pk | 0.1679418 | 3.928447 | pv |
| PF08_0128 | PKH_011530 | PVX_093595 | PY05631 | PBANKA_122<br>720 | PCHAS_12278<br>0 | 2.16436 | 2.26501 | 1.26383 | 2.08847 | 2.37069 | 2.11042 | 0.22289 | 0.0873597 | 1.26383 | pv | 0.0902266 | 2.088469 | py |
| PF08_0129 | PKH_011550 | PVX_093605 | PY02315 | PBANKA_122<br>740 | PCHAS_12280<br>0 | 5.56351 | 6.28094 | 5.46218 | 5.33115 | 5.29526 | 4.37906 | 0.38353 | 0.2436072 | 4.37906 | pc | 0.0998209 | 6.280936 | pk |
| PF08_0132 | PKH_011640 | PVX_093640 | PY03701 | PBANKA_122<br>820 | PCHAS_12289<br>0 | 3.2265  | 1.70957 | 1.60414 | 2.52218 | 2.21857 | 1.9721  | 0.44691 | 0.2854065 | 3.2265  | pf | 0.2911268 | 1.709575 | pk |
| PF10_0030 | PKH_080130 | PVX_094330 | PY05646 | PBANKA_120<br>100 | PCHAS_12017<br>0 | 3.63576 | 3.04571 | 2.92802 | 0.95156 | 3.05607 | 3.32765 | 0.5157  | 0.1979383 | 0.95156 | py | 0.2474229 | 3.056066 | pb |
| PF10_0032 | PKH_080150 | PVX_094340 | PY04382 | PBANKA_120<br>120 | PCHAS_12019<br>0 | 3.44847 | 1.0566  | 3.28813 | 2.94052 | 3.90921 | 3.51524 | 0.59795 | 0.2391605 | 1.0566  | pk | 0.2588656 | 3.288132 | pv |
| PF10_0034 | PKH_080170 | PVX_094350 | PY04290 | PBANKA_120<br>140 | PCHAS_12021<br>0 | 5.70102 | 6.17949 | 5.34682 | 0.63435 | 3.8397  | 5.6877  | 0.65397 | 0.4125008 | 3.8397  | pb | 0.5122953 | 5.687701 | pc |
| PF10_0035 | PKH_080190 | PVX_094360 | PY00940 | PBANKA_120<br>160 | PCHAS_12023<br>0 | 2.8275  | 3.13667 | 2.55293 | 5.01655 | 3.26407 | 3.35958 | 0.52052 | 0.248645  | 5.01655 | py | 0.2789554 | 3.264074 | pb |
| PF10_0036 | PKH_080200 | PVX_094365 | PY00941 | PBANKA_120<br>170 | PCHAS_12024<br>0 | 1.4913  | 2.1035  | 1.26096 | 0.19087 | 1.9884  | 1.94982 | 0.51643 | 0.2679302 | 0.19087 | py | 0.3252669 | 1.9884   | pb |
| PF10_0037 | PKH_080210 | PVX_094370 | PY00942 | PBANKA_120<br>180 | PCHAS_12025<br>0 | 5.90604 | 6.0797  | 5.77785 | 5.41038 | 5.97431 | 6.05548 | 0.1692  | 0.0902562 | 5.41038 | py | 0.1128203 | 5.974309 | pb |
| PF10_0038 | PKH_080220 | PVX_094375 | PY00943 | PBANKA_120<br>190 | PCHAS_12026<br>0 | 2.21472 | 0.81781 | 2.50933 | 2.46679 | 2.65523 | 2.49122 | 0.35941 | 0.0966099 | 0.81781 | pk | 0.1162336 | 2.509333 | pv |
| PF10_0040 | PKH_080240 | PVX_094385 | PY04338 | PBANKA_120<br>210 | PCHAS_12028<br>0 | 0.95917 | 2.48149 | 2.03922 | 2.79438 | 2.15971 | 0.62767 | 0.63492 | 0.455495  | 0.62767 | pc | 0.2692345 | 0.959171 | pf |
| PF10_0041 | PKH_080250 | PVX_094390 | PY05417 | PBANKA_120<br>220 | PCHAS_12029<br>0 | 2.05913 | 3.27019 | 2.25002 | 2.30431 | 2.27207 | 2.27368 | 0.21116 | 0.0537687 | 3.27019 | pk | 0.0616976 | 2.250021 | pv |
| PF10_0043 | PKH_080270 | PVX_094400 | PY07370 | PBANKA_120<br>240 | PCHAS_12031<br>0 | 2.41602 | 2.87191 | 2.55527 | 2.70952 | 2.4385  | 2.31986 | 0.16039 | 0.1057815 | 2.87191 | pk | 0.1030355 | 2.555269 | pv |

|           |            |            |         |                   |                  |         |         |         |         |         |         |         |           |         |    |           |          |    |
|-----------|------------|------------|---------|-------------------|------------------|---------|---------|---------|---------|---------|---------|---------|-----------|---------|----|-----------|----------|----|
| PF10_0046 | PKH_080290 | PVX_094410 | PY06662 | PBANKA_120<br>260 | PCHAS_12033<br>0 | 0.92093 | 6.27117 | 0.44948 | 1.52189 | 0.51404 | 1.74442 | 0.53929 | 0.4010719 | 1.74442 | pc | 0.3698256 | 6.271166 | pk |
| PF10_0047 | PKH_080300 | PVX_094415 | PY05537 | PBANKA_120<br>270 | PCHAS_12034<br>0 | 3.0776  | 2.39942 | 2.29851 | 2.77979 | 2.72179 | 2.02343 | 0.30964 | 0.2359276 | 3.0776  | pf | 0.2949095 | 2.39942  | pk |
| PF10_0053 | PKH_080360 | PVX_094445 | PY06890 | PBANKA_120<br>330 | PCHAS_12040<br>0 | 1.88214 | 1.70839 | 2.51198 | 1.975   | 2.88119 | 5.17264 | 0.8147  | 0.3605304 | 5.17264 | pc | 0.2241147 | 2.881192 | pb |
| PF10_0058 | PKH_080440 | PVX_094475 | PY01285 | PBANKA_120<br>390 | PCHAS_12046<br>0 | 4.5146  | 1.90334 | 3.01942 | 3.70573 | 0.7562  | 1.80319 | 1.1295  | 0.8331516 | 4.5146  | pf | 1.0414395 | 1.903344 | pk |
| PF10_0060 | PKH_080460 | PVX_094490 | PY06601 | PBANKA_120<br>410 | PCHAS_12048<br>0 | 4.8376  | 4.61523 | 3.54204 | 5.45906 | 1.71722 | 4.45815 | 0.86575 | 0.4592943 | 1.71722 | pb | 0.5348469 | 4.458151 | pc |
| PF10_0062 | PKH_080480 | PVX_094500 | PY06599 | PBANKA_120<br>430 | PCHAS_12050<br>0 | 0.66209 | 3.73254 | 6.14269 | 5.47865 | 3.728   | 4.26943 | 1.13944 | 0.8321604 | 0.66209 | pf | 0.9059795 | 3.732541 | pk |
| PF10_0067 | PKH_080540 | PVX_094530 | PY00047 | PBANKA_120<br>490 | PCHAS_12056<br>0 | 1.56778 | 2.35967 | 1.38209 | 5.14653 | 3.12661 | 1.73126 | 0.90072 | 0.5072826 | 5.14653 | py | 0.285266  | 3.126614 | pb |
| PF10_0068 | PKH_080550 | PVX_094535 | PY03354 | PBANKA_120<br>500 | PCHAS_12057<br>0 | 1.87133 | 1.85549 | 2.30279 | 2.46707 | 2.87513 | 2.51143 | 0.304   | 0.2503354 | 2.87513 | pb | 0.2607593 | 2.511428 | pc |
| PF10_0071 | PKH_080590 | PVX_094555 | PY01876 | PBANKA_120<br>540 | PCHAS_12061<br>0 | 5.48557 | 5.6317  | 5.02725 | 4.47139 | 4.77443 | 4.59607 | 0.38377 | 0.289071  | 5.6317  | pk | 0.2981328 | 5.027249 | pv |
| PF10_0072 | PKH_080600 | PVX_094560 | PY00003 | PBANKA_120<br>550 | PCHAS_12062<br>0 | 5.95316 | 5.92479 | 5.64406 | 4.03191 | 5.77834 | 5.89093 | 0.38576 | 0.0911094 | 4.03191 | py | 0.0857407 | 5.778342 | pb |
| PF10_0073 | PKH_080610 | PVX_094565 | PY00004 | PBANKA_120<br>560 | PCHAS_12063<br>0 | 5.29534 | 3.78798 | 1.81315 | 2.86682 | 4.58292 | 4.77027 | 1.0301  | 0.6821614 | 1.81315 | pv | 0.4236774 | 2.866824 | py |
| PF10_0074 | PKH_080630 | PVX_094575 | PY00006 | PBANKA_120<br>580 | PCHAS_12065<br>0 | 2.36416 | 3.20575 | 2.41544 | 4.96554 | 3.88717 | 3.60353 | 0.74515 | 0.5422181 | 4.96554 | py | 0.5074188 | 3.887165 | pb |
| PF10_0075 | PKH_080640 | PVX_094580 | PY00007 | PBANKA_120<br>590 | PCHAS_12066<br>0 | 3.59319 | 5.84334 | 2.54276 | 4.09117 | 0.83489 | 1.83858 | 1.33225 | 1.0021805 | 5.84334 | pk | 1.2527256 | 2.542762 | pv |
| PF10_0076 | PKH_080660 | PVX_094585 | PY07199 | PBANKA_120<br>600 | PCHAS_12067<br>0 | 1.95751 | 0.1586  | 5.91052 | 2.01624 | 1.5156  | 3.04978 | 0.95367 | 0.6783616 | 5.91052 | pv | 0.8332714 | 2.016237 | py |
| PF10_0077 | PKH_080670 | PVX_094590 | PY04269 | PBANKA_120<br>610 | PCHAS_12068<br>0 | 2.38952 | 2.19363 | 2.40299 | 1.93411 | 2.16377 | 2.74272 | 0.20729 | 0.1389254 | 2.74272 | pc | 0.1087746 | 1.934106 | py |
| PF10_0078 | PKH_080680 | PVX_094595 | PY07179 | PBANKA_120<br>620 | PCHAS_12069<br>0 | 2.82037 | 5.78804 | 5.79303 | 1.09556 | 2.32473 | 1.80281 | 1.13961 | 0.9079394 | 5.78804 | pk | 0.5616827 | 5.793029 | pv |
| PF10_0079 | PKH_080690 | PVX_094600 | PY00764 | PBANKA_120<br>630 | PCHAS_12070<br>0 | 3.66414 | 1.39855 | 5.03527 | 1.2951  | 0.36733 | 0.97136 | 1.0445  | 0.7148476 | 3.66414 | pf | 0.7867635 | 1.398548 | pk |
| PF10_0080 | PKH_080700 | PVX_094605 | PY00765 | PBANKA_120<br>640 | PCHAS_12071<br>0 | 4.8319  | 4.32521 | 3.93765 | 4.70802 | 4.11927 | 4.71001 | 0.3113  | 0.2194864 | 3.93765 | pv | 0.274358  | 4.708024 | py |
| PF10_0081 | PKH_080720 | PVX_094615 | PY00768 | PBANKA_120<br>660 | PCHAS_12073<br>0 | 4.26577 | 1.64159 | 3.84578 | 3.67352 | 3.32449 | 3.83597 | 0.55132 | 0.2227074 | 1.64159 | pk | 0.2759319 | 3.845776 | pv |
| PF10_0084 | PKH_080750 | PVX_094635 | PY05711 | PBANKA_120<br>690 | PCHAS_12076<br>0 | 4.39372 | 4.83384 | 5.26803 | 4.82449 | 5.14691 | 4.37713 | 0.27557 | 0.241978  | 5.26803 | pv | 0.3024725 | 4.824486 | py |
| PF10_0086 | PKH_080830 | PVX_094660 | PY01562 | PBANKA_120<br>720 | PCHAS_12079<br>0 | 2.96983 | 3.29334 | 3.45846 | 2.29542 | 3.59732 | 3.87586 | 0.39551 | 0.2420035 | 2.29542 | py | 0.2677898 | 3.597321 | pb |
| PF10_0087 | PKH_080840 | PVX_094665 | PY01561 | PBANKA_120<br>730 | PCHAS_12080<br>0 | 1.50506 | 2.92927 | 1.66226 | 2.80339 | 2.55095 | 1.90135 | 0.53582 | 0.4338102 | 1.50506 | pf | 0.4476829 | 2.929274 | pk |

|           |            |            |         |               |              |         |         |         |         |         |         |         |           |         |    |           |          |    |
|-----------|------------|------------|---------|---------------|--------------|---------|---------|---------|---------|---------|---------|---------|-----------|---------|----|-----------|----------|----|
| PF10_0090 | PKH_080870 | PVX_094680 | PY02537 | PBANKA_120760 | PCHAS_120830 | 2.07321 | 3.69835 | 1.46999 | 3.55801 | 2.31515 | 1.95786 | 0.67841 | 0.4890623 | 3.69835 | pk | 0.4605235 | 1.469994 | pv |
| PF10_0095 | PKH_080920 | PVX_094705 | PY02531 | PBANKA_120810 | PCHAS_120880 | 1.42706 | 3.59971 | 2.78254 | 4.70064 | 3.00135 | 1.47424 | 0.93631 | 0.7399515 | 4.70064 | py | 0.8702374 | 3.001346 | pb |
| PF10_0097 | PKH_080950 | PVX_094720 | PY04009 | PBANKA_120840 | PCHAS_120910 | 5.72971 | 2.45202 | 3.06766 | 3.11913 | 3.80342 | 1.65082 | 0.91363 | 0.5639419 | 5.72971 | pf | 0.5510176 | 2.452025 | pk |
| PF10_0099 | PKH_080970 | PVX_094730 | PY04011 | PBANKA_120860 | PCHAS_120930 | 1.88014 | 2.63781 | 2.30784 | 1.48763 | 1.23951 | 1.78361 | 0.38584 | 0.2921679 | 2.63781 | pk | 0.2341527 | 2.307842 | pv |
| PF10_0100 | PKH_080980 | PVX_094735 | PY06182 | PBANKA_120870 | PCHAS_120940 | 6.24211 | 0.50957 | 0.04939 | 5.23874 | 0.23597 | 0.06749 | 0.30819 | 0.1474447 | 5.23874 | py | 0.1421864 | 0.235972 | pb |
| PF10_0101 | PKH_080990 | PVX_094740 | PY06184 | PBANKA_120880 | PCHAS_120950 | 5.75885 | 0.35734 | 0.06478 | 0.06035 | 0.06526 | 2.10652 | 0.48805 | 0.1773162 | 2.10652 | pc | 0.0743666 | 5.758847 | pf |
| PF10_0103 | PKH_081010 | PVX_094750 | PY02091 | PBANKA_120900 | PCHAS_120970 | 2.18228 | 2.45447 | 2.51891 | 2.5469  | 2.28026 | 2.09505 | 0.16045 | 0.1206545 | 2.09505 | pc | 0.1277087 | 2.546903 | py |
| PF10_0104 | PKH_081020 | PVX_094755 | PY02090 | PBANKA_120910 | PCHAS_120980 | 2.67608 | 3.13298 | 2.75673 | 6.25835 | 2.83834 | 4.27112 | 0.80575 | 0.3942596 | 6.25835 | py | 0.4928245 | 2.83834  | pb |
| PF10_0105 | PKH_081030 | PVX_094760 | PY02089 | PBANKA_120920 | PCHAS_120990 | 3.16692 | 3.35243 | 2.54101 | 5.69899 | 2.75436 | 3.80568 | 0.73247 | 0.3725471 | 5.69899 | py | 0.3625451 | 2.754364 | pb |
| PF10_0106 | PKH_081040 | PVX_094765 | PY02088 | PBANKA_120930 | PCHAS_121000 | 2.12241 | 3.33079 | 1.7999  | 4.43474 | 3.62241 | 3.09658 | 0.72817 | 0.6061773 | 4.43474 | py | 0.6262638 | 3.622408 | pb |
| PF10_0107 | PKH_081050 | PVX_094770 | PY02086 | PBANKA_120940 | PCHAS_121010 | 4.87339 | 4.21891 | 0.02641 | 4.50239 | 6.16632 | 6.07575 | 0.82616 | 0.6200266 | 4.21891 | pk | 0.7165725 | 0.026408 | pv |
| PF10_0108 | PKH_081060 | PVX_094775 | PY02715 | PBANKA_120950 | PCHAS_121020 | 2.89707 | 3.64442 | 2.46016 | 3.24726 | 3.73442 | 2.18353 | 0.51422 | 0.4043206 | 2.18353 | pc | 0.3836098 | 3.734421 | pb |
| PF10_0111 | PKH_081090 | PVX_094790 | PY06767 | PBANKA_120980 | PCHAS_121050 | 3.75934 | 4.65669 | 3.38974 | 3.4922  | 3.61647 | 3.81935 | 0.28949 | 0.1393496 | 4.65669 | pk | 0.1175056 | 3.389743 | pv |
| PF10_0114 | PKH_081120 | PVX_094805 | PY01513 | PBANKA_121010 | PCHAS_121080 | 2.74123 | 0.0616  | 4.16253 | 1.20357 | 2.16669 | 2.92252 | 1.06574 | 0.7429587 | 0.0616  | pk | 0.5733736 | 4.16253  | pv |
| PF10_0115 | PKH_081130 | PVX_094810 | PY03523 | PBANKA_121020 | PCHAS_121090 | 2.72964 | 0.81218 | 0.01548 | 2.16417 | 2.14855 | 2.22682 | 0.69074 | 0.3991467 | 0.01548 | pv | 0.4989334 | 2.164166 | py |
| PF10_0116 | PKH_081140 | PVX_094815 | PY03522 | PBANKA_121030 | PCHAS_121100 | 4.60189 | 3.55618 | 3.87414 | 6.05021 | 4.17721 | 4.77563 | 0.6367  | 0.3894376 | 6.05021 | py | 0.4867969 | 4.177211 | pb |
| PF10_0117 | PKH_081150 | PVX_094820 | PY03640 | PBANKA_121040 | PCHAS_121110 | 5.19599 | 2.47901 | 5.29884 | 2.69498 | 5.13098 | 5.49119 | 0.94684 | 0.5928142 | 2.47901 | pk | 0.7153044 | 5.29884  | pv |
| PF10_0118 | PKH_081160 | PVX_094825 | PY03641 | PBANKA_121050 | PCHAS_121120 | 4.43648 | 2.84157 | 3.88868 | 1.88492 | 5.88257 | 3.15146 | 1.05496 | 0.7197328 | 5.88257 | pb | 0.899666  | 3.151457 | pc |
| PF10_0119 | PKH_081170 | PVX_094830 | PY03476 | PBANKA_121060 | PCHAS_121130 | 5.69859 | 5.95062 | 5.64849 | 4.45939 | 5.45993 | 5.58898 | 0.29823 | 0.1200604 | 4.45939 | py | 0.1029363 | 5.45993  | pb |
| PF10_0120 | PKH_081180 | PVX_094835 | PY03477 | PBANKA_121070 | PCHAS_121140 | 4.8287  | 4.04206 | 4.38224 | 5.44066 | 4.09751 | 4.29413 | 0.36965 | 0.2142729 | 5.44066 | py | 0.218685  | 4.09751  | pb |
| PF10_0122 | PKH_081200 | PVX_094845 | PY03478 | PBANKA_121090 | PCHAS_121160 | 2.37334 | 1.82014 | 1.61036 | 1.70551 | 2.9226  | 1.83969 | 0.33327 | 0.1794336 | 2.9226  | pb | 0.2194048 | 1.839691 | pc |
| PF10_0123 | PKH_081210 | PVX_094850 | PY03479 | PBANKA_121100 | PCHAS_121170 | 1.96601 | 2.58166 | 2.03041 | 1.47548 | 2.24636 | 1.91641 | 0.25009 | 0.1891206 | 1.47548 | py | 0.1824135 | 2.246356 | pb |

|           |            |            |         |                   |                  |         |         |         |         |         |         |         |           |         |    |           |          |    |
|-----------|------------|------------|---------|-------------------|------------------|---------|---------|---------|---------|---------|---------|---------|-----------|---------|----|-----------|----------|----|
| PF10_0126 | PKH_081240 | PVX_094865 | PY01361 | PBANKA_121<br>130 | PCHAS_12120<br>0 | 1.71421 | 2.06848 | 1.62004 | 2.27004 | 2.671   | 1.45246 | 0.37047 | 0.2532054 | 2.671   | pb | 0.2510685 | 1.452461 | pc |
| PF10_0129 | PKH_081270 | PVX_094880 | PY05155 | PBANKA_121<br>160 | PCHAS_12123<br>0 | 5.07072 | 5.88433 | 4.0593  | 5.05151 | 4.87518 | 5.67128 | 0.44005 | 0.325783  | 4.0593  | pv | 0.4024277 | 5.051512 | py |
| PF10_0133 | PKH_081310 | PVX_094900 | PY04831 | PBANKA_121<br>200 | PCHAS_12127<br>0 | 4.24929 | 4.60995 | 4.31293 | 5.42319 | 4.34954 | 4.77089 | 0.31538 | 0.1637245 | 5.42319 | py | 0.2046557 | 4.349541 | pb |
| PF10_0135 | PKH_081330 | PVX_094905 | PY01919 | PBANKA_121<br>220 | PCHAS_12129<br>0 | 5.57394 | 5.88202 | 5.69257 | 5.07749 | 5.48772 | 5.76588 | 0.20022 | 0.1172481 | 5.07749 | py | 0.0953485 | 5.487723 | pb |
| PF10_0136 | PKH_081340 | PVX_094910 | PY01920 | PBANKA_121<br>230 | PCHAS_12130<br>0 | 1.91737 | 4.78386 | 2.76235 | 2.33617 | 2.26108 | 2.77296 | 0.63409 | 0.2713728 | 4.78386 | pk | 0.2326695 | 2.762352 | pv |
| PF10_0137 | PKH_081350 | PVX_094915 | PY01921 | PBANKA_121<br>240 | PCHAS_12131<br>0 | 5.32588 | 4.74865 | 5.07256 | 4.49363 | 6.0817  | 5.66534 | 0.45968 | 0.3497878 | 6.0817  | pb | 0.289041  | 5.665338 | pc |
| PF10_0141 | PKH_081440 | PVX_094935 | PY05139 | PBANKA_121<br>280 | PCHAS_12135<br>0 | 1.70749 | 1.2902  | 2.76573 | 5.70506 | 3.44788 | 3.90376 | 1.21555 | 0.8707919 | 5.70506 | py | 0.9179504 | 3.447884 | pb |
| PF10_0143 | PKH_081460 | PVX_094945 | PY03808 | PBANKA_121<br>300 | PCHAS_12137<br>0 | 3.96622 | 5.63351 | 5.06523 | 2.0234  | 0.85951 | 2.33864 | 1.52281 | 1.2190051 | 5.06523 | pv | 1.5237563 | 2.023398 | py |
| PF10_0144 | PKH_081470 | PVX_094950 | PY07442 | PBANKA_121<br>310 | PCHAS_12138<br>0 | 2.62157 | 2.33293 | 1.35329 | 2.52933 | 2.80562 | 2.62782 | 0.30658 | 0.1142351 | 1.35329 | pv | 0.1197328 | 2.529327 | py |
| PF10_0145 | PKH_081480 | PVX_094955 | PY07441 | PBANKA_121<br>320 | PCHAS_12139<br>0 | 2.38838 | 6.04028 | 4.28049 | 4.58404 | 0.0851  | 2.31168 | 1.33534 | 1.1632797 | 2.38838 | pf | 1.0900397 | 6.04028  | pk |
| PF10_0147 | PKH_081500 | PVX_094970 | PY07439 | PBANKA_121<br>340 | PCHAS_12141<br>0 | 5.06753 | 2.51861 | 3.68954 | 5.56399 | 3.61577 | 2.85832 | 0.88806 | 0.6760266 | 5.56399 | py | 0.8450332 | 3.615769 | pb |
| PF10_0148 | PKH_081510 | PVX_094975 | PY07440 | PBANKA_121<br>350 | PCHAS_12142<br>0 | 4.01865 | 6.0101  | 4.71282 | 2.54601 | 3.55357 | 2.20509 | 1.07282 | 0.7960759 | 6.0101  | pk | 0.7052818 | 4.712819 | pv |
| PF10_0149 | PKH_081520 | PVX_094980 | PY04618 | PBANKA_121<br>360 | PCHAS_12143<br>0 | 2.22514 | 1.61832 | 2.633   | 2.27883 | 2.96633 | 2.17533 | 0.3099  | 0.2397726 | 1.61832 | pk | 0.2111722 | 2.633001 | pv |
| PF10_0150 | PKH_081530 | PVX_094985 | PY04617 | PBANKA_121<br>370 | PCHAS_12144<br>0 | 2.08027 | 1.18027 | 2.1107  | 1.40639 | 2.7056  | 1.70629 | 0.43394 | 0.3208625 | 2.7056  | pb | 0.4010781 | 1.706291 | pc |
| PF10_0151 | PKH_081540 | PVX_094990 | PY04616 | PBANKA_121<br>380 | PCHAS_12145<br>0 | 4.07625 | 5.58083 | 4.03062 | 3.83687 | 4.31191 | 3.33314 | 0.4614  | 0.2436308 | 5.58083 | pk | 0.3045386 | 4.030618 | pv |
| PF10_0152 | PKH_081550 | PVX_094995 | PY04615 | PBANKA_121<br>390 | PCHAS_12146<br>0 | 3.75134 | 3.71733 | 3.54252 | 3.46016 | 3.71728 | 1.23398 | 0.49155 | 0.0931975 | 1.23398 | pc | 0.0522173 | 3.460158 | py |
| PF10_0153 | PKH_081560 | PVX_095000 | PY04614 | PBANKA_121<br>400 | PCHAS_12147<br>0 | 3.11443 | 2.25753 | 2.13502 | 2.78965 | 2.77273 | 2.21546 | 0.3448  | 0.2423807 | 3.11443 | pf | 0.3029758 | 2.257532 | pk |
| PF10_0154 | PKH_081580 | PVX_095010 | PY07154 | PBANKA_121<br>420 | PCHAS_12149<br>0 | 4.18065 | 4.18056 | 4.62355 | 3.73862 | 4.60856 | 4.61966 | 0.29199 | 0.1764004 | 3.73862 | py | 0.2205005 | 4.608555 | pb |
| PF10_0155 | PKH_081610 | PVX_095015 | PY06644 | PBANKA_121<br>430 | PCHAS_12150<br>0 | 2.91526 | 2.60678 | 2.44701 | 2.13784 | 1.94626 | 2.62932 | 0.27004 | 0.191946  | 1.94626 | pb | 0.2342962 | 2.629323 | pc |
| PF10_0165 | PKH_060110 | PVX_001720 | PY00203 | PBANKA_050<br>130 | PCHAS_05014<br>0 | 3.8839  | 3.25711 | 4.01371 | 2.86825 | 4.32403 | 3.9065  | 0.3725  | 0.2393473 | 2.86825 | py | 0.1948009 | 4.324033 | pb |
| PF10_0166 | PKH_060120 | PVX_001725 | PY00202 | PBANKA_050<br>140 | PCHAS_05015<br>0 | 5.51065 | 5.92726 | 5.53001 | 4.93463 | 5.42221 | 5.5743  | 0.19401 | 0.1137387 | 4.93463 | py | 0.1152253 | 5.422213 | pb |
| PF10_0167 | PKH_060130 | PVX_001730 | PY00201 | PBANKA_050<br>150 | PCHAS_05016<br>0 | 4.54253 | 3.78794 | 4.43508 | 5.49085 | 3.44653 | 3.11477 | 0.68654 | 0.4832619 | 5.49085 | py | 0.5187262 | 3.446535 | pb |



|             |            |            |         |               |              |         |         |         |         |         |         |         |           |         |    |           |          |    |
|-------------|------------|------------|---------|---------------|--------------|---------|---------|---------|---------|---------|---------|---------|-----------|---------|----|-----------|----------|----|
| PF10_0168-a | PKH_060140 | PVX_001735 | PY00200 | PBANKA_050160 | PCHAS_050170 | 5.41308 | 5.96384 | 4.94454 | 5.3895  | 5.99598 | 5.86238 | 0.34585 | 0.2314486 | 4.94454 | pv | 0.1710914 | 5.389498 | py |
| PF10_0170   | PKH_060160 | PVX_001745 | PY02639 | PBANKA_050180 | PCHAS_050190 | 0.03315 | 0.2121  | 6.10755 | 5.83404 | 6.06979 | 5.93706 | 0.17971 | 0.1305575 | 0.2121  | pk | 0.1537573 | 6.107552 | pv |
| PF10_0171   | PKH_060170 | PVX_001750 | PY02640 | PBANKA_050190 | PCHAS_050200 | 1.89804 | 3.2949  | 3.0016  | 2.93386 | 2.79836 | 2.93594 | 0.26703 | 0.1128561 | 1.89804 | pf | 0.0513308 | 3.294899 | pk |
| PF10_0173   | PKH_060190 | PVX_001755 | PY02642 | PBANKA_050210 | PCHAS_050220 | 2.41774 | 0.16639 | 3.02059 | 3.29114 | 1.76642 | 1.94578 | 0.80848 | 0.5199071 | 0.16639 | pk | 0.4991714 | 3.020594 | pv |
| PF10_0174   | PKH_060200 | PVX_001760 | PY02643 | PBANKA_050220 | PCHAS_050230 | 3.71675 | 3.60582 | 3.34524 | 2.01121 | 3.22268 | 3.76673 | 0.41836 | 0.1831112 | 2.01121 | py | 0.1331053 | 3.22268  | pb |
| PF10_0175   | PKH_060210 | PVX_001765 | PY02644 | PBANKA_050230 | PCHAS_050240 | 3.14985 | 3.57673 | 5.60975 | 2.7222  | 2.2931  | 2.59171 | 0.78822 | 0.3683544 | 5.60975 | pv | 0.460443  | 2.722196 | py |
| PF10_0177b  | PKH_060240 | PVX_001780 | PY06959 | PBANKA_050260 | PCHAS_050270 | 0.67448 | 5.99882 | 4.50757 | 2.5502  | 3.99867 | 3.58103 | 1.22236 | 0.8750326 | 0.67448 | pf | 0.5937539 | 5.998819 | pk |
| PF10_0179   | PKH_060270 | PVX_001790 | PY05008 | PBANKA_050280 | PCHAS_050290 | 1.24725 | 1.99225 | 1.83291 | 1.36128 | 0.96655 | 2.55638 | 0.46774 | 0.3222711 | 2.55638 | pc | 0.3041582 | 0.966553 | pb |
| PF10_0180   | PKH_060280 | PVX_001795 | PY02493 | PBANKA_050290 | PCHAS_050300 | 1.89065 | 0.19563 | 4.7158  | 0.79983 | 0.98177 | 0.67038 | 0.72894 | 0.4012821 | 4.7158  | pv | 0.5016026 | 0.799834 | py |
| PF10_0181   | PKH_060290 | PVX_001800 | PY02494 | PBANKA_050300 | PCHAS_050310 | 1.10067 | 3.19345 | 3.07116 | 5.63527 | 1.00606 | 2.24375 | 1.17492 | 0.8315749 | 5.63527 | py | 0.7300465 | 1.006063 | pb |
| PF10_0182   | PKH_060300 | PVX_001805 | PY02495 | PBANKA_050310 | PCHAS_050320 | 1.93926 | 2.68794 | 2.82559 | 3.06596 | 6.14143 | 2.06338 | 0.78643 | 0.3777826 | 6.14143 | pb | 0.3160876 | 2.063376 | pc |
| PF10_0183   | PKH_060310 | PVX_001810 | PY04040 | PBANKA_050320 | PCHAS_050330 | 6.19351 | 0.43375 | 3.5922  | 0.12626 | 2.38811 | 2.19724 | 1.27892 | 0.9097535 | 3.5922  | pv | 1.0603202 | 0.126261 | py |
| PF10_0184   | PKH_060320 | PVX_001820 | PY04041 | PBANKA_050330 | PCHAS_050340 | 5.35934 | 5.64745 | 5.98852 | 5.24252 | 5.4534  | 6.05542 | 0.27269 | 0.206821  | 6.05542 | pc | 0.1247478 | 5.988515 | pv |
| PF10_0187   | PKH_060340 | PVX_001835 | PY05200 | PBANKA_050360 | PCHAS_050370 | 2.3539  | 2.25325 | 2.65834 | 2.59597 | 2.47532 | 1.88567 | 0.20614 | 0.1294327 | 1.88567 | pc | 0.1160351 | 2.658338 | pv |
| PF10_0188   | PKH_060350 | PVX_001840 | PY05202 | PBANKA_050370 | PCHAS_050380 | 4.67389 | 5.70334 | 4.41427 | 3.39705 | 4.53611 | 5.42694 | 0.57612 | 0.4359789 | 3.39705 | py | 0.5105287 | 4.536111 | pb |
| PF10_0191   | PKH_060380 | PVX_001855 | PY00607 | PBANKA_050400 | PCHAS_050410 | 4.05095 | 2.65834 | 1.88479 | 5.54818 | 2.66962 | 1.89276 | 0.97214 | 0.5886037 | 5.54818 | py | 0.7329353 | 2.669621 | pb |
| PF10_0193   | PKH_060390 | PVX_001860 | PY00606 | PBANKA_050410 | PCHAS_050420 | 5.59864 | 5.98489 | 5.35672 | 5.44737 | 5.54792 | 5.60826 | 0.13996 | 0.0805613 | 5.98489 | pk | 0.0529022 | 5.356718 | pv |
| PF10_0194   | PKH_060400 | PVX_001865 | PY00605 | PBANKA_050420 | PCHAS_050430 | 3.73905 | 1.69148 | 2.32387 | 1.33022 | 0.99571 | 5.78624 | 0.98757 | 0.7033179 | 3.73905 | pf | 0.7888322 | 1.691482 | pk |
| PF10_0196   | PKH_060430 | PVX_001875 | PY00602 | PBANKA_050450 | PCHAS_050460 | 6.11424 | 3.31381 | 6.09271 | 5.59682 | 4.1837  | 4.45842 | 0.97464 | 0.7129661 | 3.31381 | pk | 0.7672352 | 6.092706 | pv |
| PF10_0197   | PKH_060440 | PVX_001880 | PY00601 | PBANKA_050460 | PCHAS_050470 | 1.88651 | 2.90145 | 2.70486 | 4.4644  | 3.0028  | 2.18573 | 0.59859 | 0.3664033 | 4.4644  | py | 0.3835191 | 3.002804 | pb |
| PF10_0200   | PKH_060470 | PVX_001895 | PY04574 | PBANKA_050490 | PCHAS_050500 | 1.63981 | 3.11508 | 1.75303 | 1.74577 | 0.99325 | 0.99576 | 0.49751 | 0.3019575 | 3.11508 | pk | 0.3491423 | 1.753029 | pv |
| PF10_0203   | PKH_060500 | PVX_001905 | PY04572 | PBANKA_050510 | PCHAS_050520 | 4.24301 | 4.63583 | 3.86303 | 3.00632 | 4.73841 | 4.85866 | 0.52009 | 0.298206  | 3.00632 | py | 0.347112  | 4.73841  | pb |

|            |            |            |         |               |              |         |         |         |         |         |         |         |           |         |    |           |          |    |
|------------|------------|------------|---------|---------------|--------------|---------|---------|---------|---------|---------|---------|---------|-----------|---------|----|-----------|----------|----|
| PF10_0204  | PKH_060510 | PVX_001910 | PY03164 | PBANKA_050520 | PCHAS_050530 | 4.05401 | 0.23839 | 3.39244 | 5.25162 | 4.58699 | 4.21691 | 0.7828  | 0.4784294 | 0.23839 | pk | 0.3919195 | 3.392443 | pv |
| PF10_0205  | PKH_060520 | PVX_001920 | PY03165 | PBANKA_050530 | PCHAS_050540 | 0.86101 | 5.19965 | 3.12219 | 5.91679 | 4.49028 | 0.09149 | 1.10392 | 0.7657898 | 3.12219 | pv | 0.9572372 | 5.916787 | py |
| PF10_0208  | PKH_060550 | PVX_001935 | PY02254 | PBANKA_050560 | PCHAS_050570 | 2.69085 | 0.05461 | 0.44018 | 5.80036 | 2.92025 | 0.63149 | 1.03844 | 0.7501094 | 2.92025 | pb | 0.8898096 | 0.631486 | pc |
| PF10_0209  | PKH_060560 | PVX_001940 | PY02253 | PBANKA_050570 | PCHAS_050580 | 1.65373 | 0.15416 | 2.69828 | 2.09879 | 0.34638 | 1.2282  | 0.78701 | 0.6503977 | 2.69828 | pv | 0.5953494 | 2.098794 | py |
| PF10_0210  | PKH_060570 | PVX_001945 | PY02252 | PBANKA_050580 | PCHAS_050590 | 2.66033 | 3.44076 | 3.42737 | 2.26809 | 0.52128 | 5.38109 | 1.13325 | 0.8157505 | 5.38109 | pc | 0.4849279 | 0.521285 | pb |
| PF10_0212a | PKH_060590 | PVX_001955 | PY04081 | PBANKA_050600 | PCHAS_050610 | 5.12141 | 4.97663 | 4.79904 | 4.48513 | 5.25945 | 5.52898 | 0.27484 | 0.2025531 | 4.48513 | py | 0.2186802 | 5.259452 | pb |
| PF10_0214  | PKH_060610 | PVX_001965 | PY04813 | PBANKA_050620 | PCHAS_050630 | 2.75484 | 3.4805  | 2.76487 | 3.75422 | 0.40142 | 1.13756 | 0.95096 | 0.6684642 | 0.40142 | pb | 0.4287533 | 1.137559 | pc |
| PF10_0215  | PKH_060630 | PVX_001975 | PY05045 | PBANKA_050640 | PCHAS_050650 | 3.70206 | 3.48335 | 3.17431 | 2.01207 | 3.10703 | 2.00275 | 0.53964 | 0.4132624 | 2.00275 | pc | 0.2260193 | 2.012074 | py |
| PF10_0215a | PKH_060620 | PVX_001970 | PY05046 | PBANKA_050630 | PCHAS_050640 | 1.25431 | 4.38495 | 2.40137 | 1.65936 | 0.66192 | 0.4738  | 1.00928 | 0.5850035 | 4.38495 | pk | 0.4444873 | 2.401374 | pv |
| PF10_0223  | PKH_060720 | PVX_111565 | PY01666 | PBANKA_050720 | PCHAS_050730 | 6.08509 | 5.95967 | 1.72635 | 0.94151 | 3.72995 | 1.56531 | 1.10029 | 0.7626539 | 3.72995 | pb | 0.797366  | 1.565314 | pc |
| PF10_0224  | PKH_060730 | PVX_111560 | PY03506 | PBANKA_050730 | PCHAS_050740 | 1.75328 | 3.9811  | 1.94689 | 5.95986 | 0.07557 | 0.92471 | 1.16738 | 0.7895839 | 3.9811  | pk | 0.7314362 | 1.946886 | pv |
| PF10_0227  | PKH_060760 | PVX_111545 | PY01517 | PBANKA_050760 | PCHAS_050770 | 4.20355 | 3.86663 | 5.63558 | 5.08811 | 3.1388  | 4.01251 | 0.65155 | 0.4572456 | 5.63558 | pv | 0.3026571 | 5.088111 | py |
| PF10_0232  | PKH_060810 | PVX_111520 | PY02297 | PBANKA_050810 | PCHAS_050820 | 4.94025 | 5.90625 | 5.66561 | 4.80698 | 0.70966 | 1.58455 | 0.89233 | 0.6303729 | 1.58455 | pc | 0.4561581 | 0.709659 | pb |
| PF10_0245  | PKH_060930 | PVX_111455 | PY00101 | PBANKA_050930 | PCHAS_050940 | 6.01943 | 3.07034 | 1.36567 | 6.03854 | 4.08225 | 4.93689 | 1.26956 | 0.9336498 | 3.07034 | pk | 0.759706  | 1.365669 | pv |
| PF10_0250  | PKH_060980 | PVX_111435 | PY05441 | PBANKA_050970 | PCHAS_050980 | 4.7675  | 4.03422 | 2.77863 | 5.88232 | 5.862   | 5.45723 | 0.93687 | 0.5885202 | 2.77863 | pv | 0.6293801 | 5.882315 | py |
| PF10_0273  | PKH_061220 | PVX_111325 | PY05972 | PBANKA_051200 | PCHAS_051210 | 2.39514 | 3.16531 | 3.24891 | 0.47649 | 0.00631 | 5.62988 | 1.49664 | 1.2014314 | 0.00631 | pb | 0.885646  | 5.629881 | pc |
| PF10_0276  | PKH_061250 | PVX_111310 | PY02950 | PBANKA_051230 | PCHAS_051240 | 4.5539  | 4.54356 | 2.57983 | 5.17525 | 3.72153 | 5.29989 | 0.69735 | 0.4420102 | 2.57983 | pv | 0.3971768 | 5.175246 | py |
| PF10_0278  | PKH_061270 | PVX_111300 | PY05510 | PBANKA_051250 | PCHAS_051260 | 1.814   | 1.72479 | 3.24905 | 0.8225  | 0.58951 | 1.00656 | 0.72821 | 0.4253554 | 3.24905 | pv | 0.4856774 | 0.822497 | py |
| PF10_0283  | PKH_061320 | PVX_111280 | PY07110 | PBANKA_051300 | PCHAS_051310 | 5.99199 | 6.06471 | 3.82365 | 5.27544 | 6.24219 | 5.69591 | 0.58398 | 0.2671102 | 3.82365 | pv | 0.154749  | 5.275438 | py |
| PF10_0284  | PKH_061340 | PVX_111270 | PY02874 | PBANKA_051310 | PCHAS_051320 | 3.2566  | 2.25334 | 1.62643 | 6.03552 | 3.47373 | 1.48205 | 1.02047 | 0.724368  | 6.03552 | py | 0.6003636 | 3.473726 | pb |
| PF10_0286  | PKH_061360 | PVX_111260 | PY02073 | PBANKA_051330 | PCHAS_051340 | 3.3968  | 2.78999 | 2.54797 | 0.38895 | 4.4813  | 2.10036 | 0.93847 | 0.6459559 | 0.38895 | py | 0.3846163 | 4.481303 | pb |
| PF10_0289  | PKH_061390 | PVX_111245 | PY02076 | PBANKA_051360 | PCHAS_051370 | 3.39924 | 2.74972 | 5.17301 | 5.652   | 3.1704  | 1.79955 | 1.0841  | 0.8045966 | 5.652   | py | 1.0057457 | 3.170404 | pb |



|           |            |            |         |                   |                  |         |         |         |         |         |         |         |           |         |    |           |          |    |
|-----------|------------|------------|---------|-------------------|------------------|---------|---------|---------|---------|---------|---------|---------|-----------|---------|----|-----------|----------|----|
| PF10_0298 | PKH_061480 | PVX_111200 | PY00527 | PBANKA_051<br>450 | PCHAS_05146<br>0 | 3.3908  | 3.37435 | 0.944   | 3.07258 | 3.19306 | 2.70505 | 0.53943 | 0.1975033 | 0.944   | pv | 0.2167587 | 3.072582 | py |
| PF10_0307 | PKH_061560 | PVX_111160 | PY05982 | PBANKA_051<br>530 | PCHAS_05154<br>0 | 5.75404 | 5.18663 | 5.53059 | 2.44557 | 4.94555 | 4.35118 | 0.78816 | 0.3975796 | 2.44557 | py | 0.436704  | 4.945546 | pb |
| PF10_0312 | PKH_061610 | PVX_111135 | PY06322 | PBANKA_051<br>560 | PCHAS_05157<br>0 | 5.1979  | 4.75142 | 6.13096 | 5.59796 | 3.75156 | 4.38939 | 0.67241 | 0.5176215 | 3.75156 | pb | 0.4449004 | 4.389394 | pc |
| PF10_0314 | PKH_061650 | PVX_111120 | PY00841 | PBANKA_051<br>590 | PCHAS_05160<br>0 | 1.13149 | 0.25611 | 1.32575 | 1.43709 | 5.72405 | 0.82911 | 0.56137 | 0.3355242 | 5.72405 | pb | 0.343809  | 0.829106 | pc |
| PF10_0319 | PKH_061710 | PVX_111090 | PY02600 | PBANKA_051<br>650 | PCHAS_05166<br>0 | 2.75796 | 0.63765 | 6.11319 | 2.66383 | 2.26471 | 2.37848 | 0.84465 | 0.503885  | 6.11319 | pv | 0.558519  | 2.663825 | py |
| PF10_0321 | PKH_061740 | PVX_111075 | PY04753 | PBANKA_051<br>680 | PCHAS_05169<br>0 | 1.9741  | 0.62688 | 5.42323 | 4.03713 | 2.98604 | 2.8589  | 1.16442 | 0.8844403 | 5.42323 | pv | 0.8109913 | 4.037134 | py |
| PF10_0324 | PKH_061770 | PVX_111060 | PY03151 | PBANKA_051<br>710 | PCHAS_05172<br>0 | 2.62152 | 3.12413 | 3.56397 | 0.2198  | 2.27897 | 0.03724 | 1.12893 | 0.8378662 | 0.03724 | pc | 0.4469031 | 0.219798 | py |
| PF10_0326 | PKH_061790 | PVX_111050 | PY03149 | PBANKA_051<br>730 | PCHAS_05174<br>0 | 1.80905 | 2.30598 | 3.19229 | 2.28317 | 0.00835 | 1.90643 | 0.67627 | 0.3565577 | 0.00835 | pb | 0.351514  | 1.906433 | pc |
| PF10_0327 | PKH_061800 | PVX_111045 | PY03148 | PBANKA_051<br>740 | PCHAS_05175<br>0 | 2.00149 | 1.18403 | 2.51317 | 1.97961 | 0.37097 | 2.39438 | 0.5624  | 0.3487804 | 0.37097 | pb | 0.3377532 | 2.394375 | pc |
| PF10_0331 | PKH_061890 | PVX_111025 | PY00467 | PBANKA_051<br>780 | PCHAS_05179<br>0 | 1.47259 | 3.75966 | 6.28054 | 3.35951 | 1.29764 | 4.70848 | 1.43649 | 1.1395821 | 6.28054 | pv | 1.3773278 | 3.359513 | py |
| PF10_0332 | PKH_061910 | PVX_111015 | PY00465 | PBANKA_051<br>800 | PCHAS_05181<br>0 | 3.74843 | 3.95205 | 5.85346 | 3.24984 | 0.10215 | 5.10887 | 1.06622 | 0.7928121 | 0.10215 | pb | 0.7018094 | 5.108869 | pc |
| PF10_0335 | PKH_061940 | PVX_111000 | PY05469 | PBANKA_051<br>830 | PCHAS_05184<br>0 | 4.19976 | 0.02009 | 1.28669 | 4.51059 | 2.46728 | 2.61361 | 1.25832 | 0.9912754 | 0.02009 | pk | 0.9073645 | 1.286695 | pv |
| PF10_0337 | PKH_061960 | PVX_110990 | PY05471 | PBANKA_051<br>850 | PCHAS_05186<br>0 | 5.22193 | 3.96371 | 4.55571 | 4.42302 | 5.82045 | 5.2658  | 0.56096 | 0.4202001 | 5.82045 | pb | 0.3477263 | 5.265801 | pc |
| PF10_0338 | PKH_061970 | PVX_110985 | PY05474 | PBANKA_051<br>860 | PCHAS_05187<br>0 | 4.1087  | 3.13904 | 3.5458  | 5.90979 | 3.25306 | 2.57935 | 0.76547 | 0.3872207 | 5.90979 | py | 0.4840259 | 3.253058 | pb |
| PF10_0359 | PKH_062090 | PVX_110925 | PY01011 | PBANKA_051<br>970 | PCHAS_05199<br>0 | 2.76458 | 2.85168 | 2.46481 | 5.94976 | 3.19392 | 3.21858 | 0.71353 | 0.2366223 | 5.94976 | py | 0.2102165 | 3.193922 | pb |
| PF10_0361 | PKH_062110 | PVX_110915 | PY01008 | PBANKA_051<br>990 | PCHAS_05201<br>0 | 1.63424 | 1.67533 | 5.91401 | 2.73655 | 1.12714 | 2.16614 | 0.69764 | 0.428262  | 5.91401 | pv | 0.270023  | 2.736548 | py |
| PF10_0363 | PKH_062130 | PVX_110905 | PY03879 | PBANKA_052<br>000 | PCHAS_05202<br>0 | 3.09736 | 3.35063 | 2.45017 | 3.67436 | 3.37035 | 0.12412 | 0.75897 | 0.2994349 | 0.12412 | pc | 0.1491796 | 2.450175 | pv |
| PF10_0368 | PKH_062180 | PVX_110885 | PY04073 | PBANKA_052<br>040 | PCHAS_05206<br>0 | 5.77826 | 5.95029 | 6.17154 | 3.66329 | 5.35217 | 5.58299 | 0.55027 | 0.2373341 | 3.66329 | py | 0.1901453 | 5.352169 | pb |
| PF10_0373 | PKH_062240 | PVX_110850 | PY06809 | PBANKA_052<br>100 | PCHAS_05212<br>0 | 2.37322 | 2.33389 | 3.85835 | 3.54357 | 1.37509 | 2.20617 | 0.64333 | 0.4671059 | 3.85835 | pv | 0.2814636 | 3.543566 | py |
| PF11_0043 | PKH_090030 | PVX_090845 | PY06972 | PBANKA_094<br>360 | PCHAS_09007<br>0 | 2.2269  | 1.63065 | 2.42736 | 2.69906 | 2.61462 | 2.67545 | 0.28404 | 0.1440527 | 1.63065 | pk | 0.1332499 | 2.427358 | pv |
| PF11_0047 | PKH_090080 | PVX_090865 | PY00904 | PBANKA_094<br>330 | PCHAS_09010<br>0 | 1.97173 | 2.73839 | 2.88352 | 3.0071  | 2.91687 | 2.8453  | 0.20868 | 0.0680564 | 1.97173 | pf | 0.0487878 | 2.738388 | pk |
| PF11_0048 | PKH_090090 | PVX_090870 | PY01939 | PBANKA_094<br>320 | PCHAS_09011<br>0 | 2.77926 | 4.95834 | 2.09261 | 3.09759 | 2.99742 | 2.12095 | 0.67675 | 0.3762886 | 4.95834 | pk | 0.2986992 | 2.092613 | pv |

|             |            |            |         |                   |                  |         |         |         |         |         |         |         |           |         |    |           |          |    |
|-------------|------------|------------|---------|-------------------|------------------|---------|---------|---------|---------|---------|---------|---------|-----------|---------|----|-----------|----------|----|
| PF11_0049   | PKH_090100 | PVX_090875 | PY01940 | PBANKA_094<br>310 | PCHAS_09012<br>0 | 4.22918 | 1.27215 | 2.53387 | 5.28853 | 2.94059 | 2.34192 | 1.05173 | 0.7111387 | 5.28853 | py | 0.787244  | 2.940587 | pb |
| PF11_0052   | PKH_090130 | PVX_090885 | PY02378 | PBANKA_094<br>280 | PCHAS_09015<br>0 | 1.03376 | 3.2671  | 1.91568 | 2.75209 | 1.941   | 1.64971 | 0.56017 | 0.4019232 | 3.2671  | pk | 0.502404  | 1.915679 | pv |
| PF11_0053   | PKH_090140 | PVX_090890 | PY02376 | PBANKA_094<br>270 | PCHAS_09016<br>0 | 1.86555 | 5.87235 | 0.53874 | 2.70915 | 6.02212 | 2.26712 | 1.1625  | 0.9609156 | 2.70915 | py | 1.0011934 | 6.02212  | pb |
| PF11_0055   | PKH_090160 | PVX_090900 | PY03715 | PBANKA_094<br>250 | PCHAS_09018<br>0 | 3.28455 | 4.40376 | 3.25871 | 3.13445 | 2.47297 | 3.32722 | 0.35823 | 0.2008702 | 4.40376 | pk | 0.2510878 | 3.258709 | pv |
| PF11_0058-a | PKH_090190 | PVX_090915 | PY02385 | PBANKA_094<br>220 | PCHAS_09021<br>0 | 2.76993 | 2.40136 | 2.63772 | 5.06655 | 2.8915  | 3.55145 | 0.61674 | 0.2807713 | 5.06655 | py | 0.3205738 | 2.891496 | pb |
| PF11_0059   | PKH_090200 | PVX_090920 | PY02384 | PBANKA_094<br>210 | PCHAS_09022<br>0 | 2.8665  | 2.63066 | 2.45125 | 5.73006 | 2.56015 | 2.30611 | 0.64218 | 0.1479593 | 5.73006 | py | 0.1849491 | 2.560149 | pb |
| PF11_0065   | PKH_090260 | PVX_090950 | PY03779 | PBANKA_094<br>150 | PCHAS_09028<br>0 | 2.42    | 2.10897 | 2.53281 | 2.56945 | 2.6767  | 2.32758 | 0.15373 | 0.0997145 | 2.10897 | pk | 0.1246431 | 2.532808 | pv |
| PF11_0066   | PKH_090270 | PVX_090955 | PY03778 | PBANKA_094<br>140 | PCHAS_09029<br>0 | 4.42255 | 5.27767 | 5.20318 | 5.46606 | 5.47549 | 6.11935 | 0.35959 | 0.2227994 | 4.42255 | pf | 0.2313995 | 5.277665 | pk |
| PF11_0067   | PKH_090280 | PVX_090960 | PY03777 | PBANKA_094<br>130 | PCHAS_09030<br>0 | 0.79329 | 0.44658 | 0.65231 | 0.12079 | 6.138   | 2.70992 | 0.62222 | 0.2939993 | 2.70992 | pc | 0.2195587 | 6.137999 | pb |
| PF11_0068   | PKH_090290 | PVX_090965 | PY03776 | PBANKA_094<br>120 | PCHAS_09031<br>0 | 1.64817 | 2.94286 | 2.65737 | 3.58988 | 3.37962 | 2.71326 | 0.48226 | 0.3197738 | 1.64817 | pf | 0.3997173 | 2.942865 | pk |
| PF11_0069   | PKH_090300 | PVX_090970 | PY03372 | PBANKA_094<br>110 | PCHAS_09032<br>0 | 3.31285 | 3.2809  | 2.38397 | 3.18952 | 3.09848 | 5.57183 | 0.58227 | 0.2222602 | 5.57183 | pc | 0.0764391 | 2.383971 | pv |
| PF11_0071   | PKH_090320 | PVX_090975 | PY03371 | PBANKA_094<br>090 | PCHAS_09034<br>0 | 2.20987 | 2.73182 | 1.07795 | 2.29884 | 2.60478 | 2.45835 | 0.36805 | 0.1655767 | 1.07795 | pv | 0.1670924 | 2.298841 | py |
| PF11_0072   | PKH_090330 | PVX_090980 | PY03370 | PBANKA_094<br>080 | PCHAS_09035<br>0 | 4.03518 | 4.26144 | 3.52168 | 2.71541 | 4.28149 | 4.46451 | 0.45586 | 0.2378264 | 2.71541 | py | 0.2922709 | 4.281488 | pb |
| PF11_0073   | PKH_090340 | PVX_090985 | PY03369 | PBANKA_094<br>070 | PCHAS_09036<br>0 | 3.46069 | 3.12462 | 2.71847 | 0.99691 | 3.04962 | 0.05142 | 0.97802 | 0.5739867 | 0.05142 | pc | 0.2043051 | 0.996909 | py |
| PF11_0076   | PKH_090370 | PVX_091000 | PY05771 | PBANKA_094<br>040 | PCHAS_09039<br>0 | 2.48777 | 1.51161 | 2.43138 | 2.20427 | 2.48757 | 1.95522 | 0.28927 | 0.163172  | 1.51161 | pk | 0.2039649 | 2.431379 | pv |
| PF11_0078   | PKH_090390 | PVX_091010 | PY06416 | PBANKA_094<br>020 | PCHAS_09041<br>0 | 2.36773 | 2.49577 | 2.69412 | 5.45469 | 3.40882 | 2.36718 | 0.72116 | 0.2736072 | 5.45469 | py | 0.1137459 | 3.408823 | pb |
| PF11_0079   | PKH_090400 | PVX_091015 | PY02790 | PBANKA_094<br>010 | PCHAS_09042<br>0 | 2.99877 | 3.00999 | 2.96675 | 2.94056 | 5.01596 | 2.43225 | 0.44753 | 0.12719   | 5.01596 | pb | 0.0253607 | 2.432246 | pc |
| PF11_0083   | PKH_090430 | PVX_091030 | PY03627 | PBANKA_093<br>980 | PCHAS_09045<br>0 | 5.09139 | 2.27132 | 2.30499 | 0.77103 | 3.23871 | 5.90459 | 1.32855 | 1.0302507 | 5.09139 | pf | 1.2878133 | 2.271318 | pk |
| PF11_0087   | PKH_090470 | PVX_091045 | PY03786 | PBANKA_093<br>950 | PCHAS_09048<br>0 | 4.02836 | 3.9234  | 5.44496 | 4.91697 | 4.71418 | 4.80968 | 0.41761 | 0.354977  | 5.44496 | pv | 0.3930235 | 4.916973 | py |
| PF11_0088   | PKH_090480 | PVX_091050 | PY03787 | PBANKA_093<br>940 | PCHAS_09049<br>0 | 2.53843 | 3.58938 | 2.24133 | 5.7373  | 3.64023 | 2.61427 | 0.92881 | 0.4899701 | 5.7373  | py | 0.3559716 | 3.640232 | pb |
| PF11_0090   | PKH_090500 | PVX_091060 | PY07549 | PBANKA_093<br>920 | PCHAS_09051<br>0 | 1.85887 | 1.74729 | 2.00509 | 1.94072 | 0.69882 | 1.73393 | 0.27077 | 0.0929191 | 0.69882 | pb | 0.0849137 | 1.733927 | pc |
| PF11_0091   | PKH_090510 | PVX_091065 | PY07039 | PBANKA_093<br>910 | PCHAS_09052<br>0 | 5.57674 | 6.18946 | 6.16225 | 3.09643 | 0.19108 | 0.5368  | 0.77471 | 0.3110514 | 3.09643 | py | 0.317614  | 0.191075 | pb |

|           |            |            |         |                   |                  |         |         |         |         |         |         |         |           |         |    |           |          |    |
|-----------|------------|------------|---------|-------------------|------------------|---------|---------|---------|---------|---------|---------|---------|-----------|---------|----|-----------|----------|----|
| PF11_0093 | PKH_090530 | PVX_091080 | PY03357 | PBANKA_093<br>890 | PCHAS_09054<br>0 | 0.99275 | 0.88353 | 0.14498 | 1.1244  | 2.20712 | 2.0035  | 0.55229 | 0.4668685 | 0.14498 | pv | 0.5835856 | 1.124405 | py |
| PF11_0095 | PKH_090550 | PVX_091090 | PY00917 | PBANKA_093<br>870 | PCHAS_09056<br>0 | 0.92469 | 2.72531 | 2.55862 | 5.12291 | 2.97371 | 2.72671 | 0.76912 | 0.4434225 | 5.12291 | py | 0.4921783 | 2.97371  | pb |
| PF11_0097 | PKH_090570 | PVX_091100 | PY05049 | PBANKA_093<br>850 | PCHAS_09058<br>0 | 4.69338 | 4.29339 | 4.14994 | 5.30534 | 4.18043 | 4.61374 | 0.33145 | 0.1953511 | 5.30534 | py | 0.215949  | 4.180425 | pb |
| PF11_0098 | PKH_090580 | PVX_091105 | PY05050 | PBANKA_093<br>840 | PCHAS_09059<br>0 | 4.01493 | 3.95079 | 3.50975 | 5.5002  | 3.90082 | 0.17476 | 0.76862 | 0.4209133 | 0.17476 | pc | 0.1387886 | 5.500203 | py |
| PF11_0099 | PKH_090590 | PVX_091110 | PY07174 | PBANKA_093<br>830 | PCHAS_09060<br>0 | 3.7661  | 4.4668  | 3.40625 | 5.98496 | 3.55067 | 4.26569 | 0.66574 | 0.355115  | 5.98496 | py | 0.3900351 | 3.550666 | pb |
| PF11_0100 | PKH_090600 | PVX_091115 | PY02753 | PBANKA_093<br>820 | PCHAS_09061<br>0 | 2.52538 | 3.51119 | 1.08791 | 1.24421 | 4.67276 | 1.04395 | 1.12656 | 0.7809403 | 4.67276 | pb | 0.9261102 | 1.043948 | pc |
| PF11_0101 | PKH_090610 | PVX_091120 | PY02752 | PBANKA_093<br>810 | PCHAS_09062<br>0 | 2.15418 | 1.56506 | 2.55001 | 1.37808 | 2.25688 | 1.59443 | 0.40392 | 0.2935846 | 2.55001 | pv | 0.3128928 | 1.378083 | py |
| PF11_0105 | PKH_090640 | PVX_091140 | PY00699 | PBANKA_093<br>780 | PCHAS_09065<br>0 | 1.54028 | 1.11102 | 1.92812 | 1.00561 | 0.56457 | 5.97187 | 0.55343 | 0.3796441 | 5.97187 | pc | 0.2702812 | 1.928118 | pv |
| PF11_0106 | PKH_090660 | PVX_091145 | PY06787 | PBANKA_093<br>770 | PCHAS_09066<br>0 | 2.09987 | 1.79348 | 2.46985 | 2.69899 | 2.34658 | 2.25677 | 0.22755 | 0.1624396 | 1.79348 | pk | 0.1722338 | 2.469846 | pv |
| PF11_0107 | PKH_090680 | PVX_091155 | PY03705 | PBANKA_093<br>750 | PCHAS_09068<br>0 | 5.71459 | 6.05858 | 4.87384 | 6.01297 | 4.6635  | 5.44185 | 0.46783 | 0.3511722 | 4.6635  | pb | 0.3707814 | 5.441851 | pc |
| PF11_0111 | PKH_090770 | PVX_091170 | PY01748 | PBANKA_093<br>720 | PCHAS_09071<br>0 | 2.00346 | 2.65173 | 2.4216  | 1.68233 | 1.17648 | 1.96183 | 0.37603 | 0.2858334 | 1.17648 | pb | 0.3468837 | 1.961832 | pc |
| PF11_0112 | PKH_090780 | PVX_091175 | PY01746 | PBANKA_093<br>710 | PCHAS_09072<br>0 | 3.77309 | 6.25266 | 4.44148 | 5.35609 | 4.0459  | 5.10803 | 0.74272 | 0.5290266 | 6.25266 | pk | 0.6612833 | 4.441475 | pv |
| PF11_0113 | PKH_090790 | PVX_091180 | PY01745 | PBANKA_093<br>700 | PCHAS_09073<br>0 | 4.68458 | 4.02476 | 3.61554 | 3.95091 | 3.30059 | 5.50055 | 0.55714 | 0.3586423 | 5.50055 | pc | 0.285724  | 3.300591 | pb |
| PF11_0114 | PKH_090800 | PVX_091185 | PY01744 | PBANKA_093<br>690 | PCHAS_09074<br>0 | 5.33038 | 5.27129 | 4.90845 | 4.54531 | 5.52567 | 5.16323 | 0.25173 | 0.1568746 | 4.54531 | py | 0.1324986 | 5.525668 | pb |
| PF11_0115 | PKH_090820 | PVX_091195 | PY01743 | PBANKA_093<br>670 | PCHAS_09076<br>0 | 1.11195 | 0.24229 | 2.85644 | 2.37029 | 0.81712 | 0.06498 | 0.86905 | 0.6349938 | 2.85644 | pv | 0.4054492 | 2.370291 | py |
| PF11_0116 | PKH_090830 | PVX_091200 | PY01742 | PBANKA_093<br>660 | PCHAS_09077<br>0 | 1.82835 | 2.8102  | 2.61122 | 1.89272 | 0.71826 | 0.51905 | 0.70808 | 0.5749618 | 0.51905 | pc | 0.4893312 | 2.810205 | pk |
| PF11_0117 | PKH_090840 | PVX_091205 | PY01741 | PBANKA_093<br>650 | PCHAS_09078<br>0 | 3.81556 | 3.61358 | 1.70597 | 5.40982 | 4.37808 | 4.74755 | 0.90006 | 0.5456468 | 1.70597 | pv | 0.4241222 | 5.409821 | py |
| PF11_0118 | PKH_090850 | PVX_091210 | PY02705 | PBANKA_093<br>640 | PCHAS_09079<br>0 | 2.39812 | 3.88444 | 1.23165 | 2.24913 | 3.72628 | 2.09777 | 0.73838 | 0.6527641 | 1.23165 | pv | 0.7787065 | 2.249126 | py |
| PF11_0122 | PKH_090890 | PVX_091230 | PY03723 | PBANKA_093<br>600 | PCHAS_09083<br>0 | 4.55459 | 3.84999 | 0.07743 | 0.25631 | 0.24947 | 1.6924  | 1.04709 | 0.7199767 | 3.84999 | pk | 0.8569588 | 0.077426 | pv |
| PF11_0123 | PKH_090900 | PVX_091235 | PY03726 | PBANKA_093<br>590 | PCHAS_09084<br>0 | 1.95035 | 3.09217 | 3.12955 | 1.7516  | 2.40683 | 1.92324 | 0.50056 | 0.3648318 | 3.12955 | pv | 0.4063512 | 1.751597 | py |
| PF11_0127 | PKH_090940 | PVX_091255 | PY05034 | PBANKA_093<br>550 | PCHAS_09088<br>0 | 5.20246 | 5.0025  | 4.99041 | 3.01757 | 5.0977  | 5.54987 | 0.47326 | 0.1518836 | 3.01757 | py | 0.1898545 | 5.097702 | pb |
| PF11_0131 | PKH_090990 | PVX_091280 | PY05480 | PBANKA_093<br>500 | PCHAS_09093<br>0 | 4.5061  | 4.02712 | 4.84488 | 4.08924 | 3.89416 | 3.9668  | 0.25869 | 0.146875  | 4.84488 | pv | 0.168062  | 4.089244 | py |

|             |            |            |         |                   |                  |         |         |         |         |         |         |         |           |         |    |           |          |    |
|-------------|------------|------------|---------|-------------------|------------------|---------|---------|---------|---------|---------|---------|---------|-----------|---------|----|-----------|----------|----|
| PF11_0139   | PKH_091030 | PVX_091305 | PY05564 | PBANKA_093<br>450 | PCHAS_09098<br>0 | 0.06988 | 0.17379 | 6.05418 | 1.52825 | 0.23947 | 0.04508 | 0.34259 | 0.1194372 | 1.52825 | py | 0.1069007 | 0.239467 | pb |
| PF11_0143   | PKH_091070 | PVX_091320 | PY00735 | PBANKA_093<br>410 | PCHAS_09102<br>0 | 1.34164 | 3.1231  | 3.15547 | 2.47751 | 0.77802 | 2.23452 | 0.73365 | 0.5404807 | 0.77802 | pb | 0.6148553 | 2.234525 | pc |
| PF11_0144   | PKH_091080 | PVX_091325 | PY00734 | PBANKA_093<br>400 | PCHAS_09103<br>0 | 1.08794 | 3.34293 | 0.67811 | 4.31783 | 0.61247 | 1.59751 | 1.11719 | 0.7299739 | 4.31783 | py | 0.7936005 | 0.612471 | pb |
| PF11_0145   | PKH_091090 | PVX_091330 | PY00733 | PBANKA_093<br>390 | PCHAS_09104<br>0 | 2.4055  | 2.71118 | 1.15799 | 4.52895 | 3.51    | 2.08577 | 0.85014 | 0.5954836 | 4.52895 | py | 0.4682293 | 3.510004 | pb |
| PF11_0149-a | PKH_091130 | PVX_091350 | PY00729 | PBANKA_093<br>350 | PCHAS_09108<br>0 | 5.39952 | 0.37136 | 5.59753 | 4.52598 | 5.17408 | 5.49094 | 0.44057 | 0.2776818 | 0.37136 | pk | 0.2975994 | 5.597527 | pv |
| PF11_0152   | PKH_091140 | PVX_091355 | PY00727 | PBANKA_093<br>340 | PCHAS_09109<br>0 | 0.70981 | 5.57688 | 5.15738 | 5.4361  | 3.06133 | 2.53704 | 1.20837 | 0.8702339 | 2.53704 | pc | 0.4940988 | 3.06133  | pb |
| PF11_0153   | PKH_091150 | PVX_091360 | PY00725 | PBANKA_093<br>330 | PCHAS_09110<br>0 | 3.75142 | 5.37984 | 3.26802 | 0.68163 | 3.54683 | 2.43705 | 1.04857 | 0.6852397 | 0.68163 | py | 0.8565496 | 3.546828 | pb |
| PF11_0154   | PKH_091160 | PVX_091365 | PY00724 | PBANKA_093<br>320 | PCHAS_09111<br>0 | 3.79132 | 3.40159 | 2.81022 | 3.37108 | 3.24451 | 3.47461 | 0.20695 | 0.1300659 | 2.81022 | pv | 0.1549557 | 3.371084 | py |
| PF11_0156   | PKH_091180 | PVX_091375 | PY02926 | PBANKA_093<br>300 | PCHAS_09113<br>0 | 2.68435 | 3.05304 | 3.15068 | 2.0358  | 3.66186 | 1.58454 | 0.59348 | 0.4184795 | 1.58454 | pc | 0.3708947 | 3.661864 | pb |
| PF11_0158   | PKH_091200 | PVX_091385 | PY00788 | PBANKA_093<br>280 | PCHAS_09115<br>0 | 5.29356 | 5.58881 | 5.02638 | 5.15502 | 5.29921 | 5.7189  | 0.18866 | 0.1413248 | 5.7189  | pc | 0.1098615 | 5.026377 | pv |
| PF11_0160   | PKH_091230 | PVX_091400 | PY00784 | PBANKA_093<br>250 | PCHAS_09118<br>0 | 6.17916 | 6.17425 | 6.23081 | 4.12881 | 5.88208 | 5.38084 | 0.53208 | 0.2294123 | 4.12881 | py | 0.2137224 | 5.882076 | pb |
| PF11_0168a  | PKH_091350 | PVX_091435 | PY02157 | PBANKA_093<br>190 | PCHAS_09124<br>0 | 5.18857 | 5.58983 | 5.2938  | 5.08908 | 5.75843 | 3.60042 | 0.46067 | 0.2141226 | 3.60042 | pc | 0.1514961 | 5.758432 | pb |
| PF11_0169   | PKH_091360 | PVX_091440 | PY02155 | PBANKA_093<br>180 | PCHAS_09125<br>0 | 1.52885 | 1.65284 | 2.30657 | 0.02104 | 3.64739 | 2.13161 | 0.81381 | 0.5544545 | 0.02104 | py | 0.3141232 | 3.647389 | pb |
| PF11_0170   | PKH_091370 | PVX_091445 | PY02154 | PBANKA_093<br>170 | PCHAS_09126<br>0 | 2.24364 | 3.25571 | 2.73916 | 4.60513 | 3.47319 | 3.57127 | 0.56851 | 0.412329  | 4.60513 | py | 0.4610435 | 3.473185 | pb |
| PF11_0171   | PKH_091380 | PVX_091450 | PY02153 | PBANKA_093<br>160 | PCHAS_09127<br>0 | 3.5871  | 3.01257 | 2.86255 | 4.56592 | 5.66291 | 4.25955 | 0.83769 | 0.5900688 | 5.66291 | pb | 0.5694732 | 4.259551 | pc |
| PF11_0172   | PKH_091390 | PVX_091455 | PY02152 | PBANKA_093<br>150 | PCHAS_09128<br>0 | 4.66877 | 6.23892 | 0.52454 | 4.5368  | 5.14492 | 5.06735 | 0.65311 | 0.4356529 | 0.52454 | pv | 0.4119295 | 4.536801 | py |
| PF11_0173   | PKH_091400 | PVX_091460 | PY02151 | PBANKA_093<br>140 | PCHAS_09129<br>0 | 3.07823 | 4.35532 | 3.53911 | 5.49908 | 2.41928 | 4.74663 | 0.9274  | 0.7208885 | 5.49908 | py | 0.6211526 | 2.419277 | pb |
| PF11_0174   | PKH_091410 | PVX_091465 | PY05365 | PBANKA_093<br>130 | PCHAS_09130<br>0 | 1.51751 | 1.91328 | 1.47304 | 2.39483 | 2.45365 | 3.51236 | 0.57617 | 0.3715849 | 3.51236 | pc | 0.354421  | 1.473044 | pv |
| PF11_0177   | PKH_091450 | PVX_091485 | PY04400 | PBANKA_093<br>090 | PCHAS_09134<br>0 | 4.36976 | 4.19513 | 3.05637 | 4.49225 | 4.16935 | 4.40724 | 0.30807 | 0.1070018 | 3.05637 | pv | 0.1031322 | 4.492245 | py |
| PF11_0181   | PKH_091490 | PVX_091505 | PY06291 | PBANKA_093<br>050 | PCHAS_09138<br>0 | 3.36728 | 3.52515 | 2.54754 | 2.74797 | 2.7134  | 1.4689  | 0.48509 | 0.3262982 | 1.4689  | pc | 0.2135794 | 3.525145 | pk |
| PF11_0184   | PKH_091520 | PVX_091525 | PY05214 | PBANKA_093<br>020 | PCHAS_09141<br>0 | 2.50668 | 4.58053 | 4.47797 | 3.77977 | 4.58032 | 4.70728 | 0.51728 | 0.2060128 | 2.50668 | pf | 0.257465  | 4.580525 | pk |
| PF11_0185   | PKH_091530 | PVX_091530 | PY05215 | PBANKA_093<br>010 | PCHAS_09142<br>0 | 5.15471 | 5.56309 | 5.13376 | 0.29225 | 5.53437 | 4.39231 | 0.49868 | 0.3142754 | 0.29225 | py | 0.2979309 | 5.534366 | pb |

|           |            |            |         |               |              |         |         |         |         |         |         |         |           |         |    |           |          |    |
|-----------|------------|------------|---------|---------------|--------------|---------|---------|---------|---------|---------|---------|---------|-----------|---------|----|-----------|----------|----|
| PF11_0187 | PKH_091550 | PVX_091540 | PY05216 | PBANKA_093000 | PCHAS_091430 | 2.83814 | 5.20915 | 5.26509 | 6.12498 | 3.58951 | 0.67714 | 1.11893 | 0.8573274 | 2.83814 | pf | 1.0576733 | 5.209147 | pk |
| PF11_0189 | PKH_091570 | PVX_091550 | PY04232 | PBANKA_092980 | PCHAS_091450 | 1.30846 | 3.34055 | 3.22523 | 6.01973 | 3.18719 | 2.77613 | 0.88562 | 0.4962387 | 6.01973 | py | 0.6202983 | 3.187192 | pb |
| PF11_0190 | PKH_091580 | PVX_091555 | PY04231 | PBANKA_092970 | PCHAS_091460 | 5.32098 | 4.8576  | 4.35414 | 0.83171 | 3.7931  | 4.75131 | 0.73249 | 0.4062681 | 0.83171 | py | 0.2682821 | 3.793099 | pb |
| PF11_0192 | PKH_091600 | PVX_091565 | PY00909 | PBANKA_092950 | PCHAS_091480 | 1.08056 | 0.83479 | 3.12106 | 6.2302  | 4.4923  | 6.00709 | 1.18191 | 0.7964652 | 3.12106 | pv | 0.9955816 | 6.230196 | py |
| PF11_0193 | PKH_091610 | PVX_091570 | PY00910 | PBANKA_092940 | PCHAS_091490 | 5.63138 | 5.77757 | 5.6456  | 5.17491 | 5.6989  | 5.74626 | 0.12847 | 0.0493696 | 5.17491 | py | 0.061712  | 5.698899 | pb |
| PF11_0197 | PKH_091640 | PVX_091585 | PY04674 | PBANKA_092910 | PCHAS_091520 | 3.80031 | 3.27632 | 2.45237 | 5.26304 | 5.43036 | 0.1282  | 1.26263 | 0.9530235 | 2.45237 | pv | 1.1912794 | 5.263042 | py |
| PF11_0198 | PKH_091650 | PVX_091590 | PY04675 | PBANKA_092900 | PCHAS_091530 | 2.46049 | 2.08306 | 3.83283 | 1.17038 | 3.53955 | 3.93841 | 0.93281 | 0.6455389 | 1.17038 | py | 0.8069236 | 3.539552 | pb |
| PF11_0199 | PKH_091660 | PVX_091595 | PY04676 | PBANKA_092890 | PCHAS_091540 | 1.3324  | 2.14235 | 2.37882 | 0.20108 | 3.01776 | 0.18507 | 0.97006 | 0.8270022 | 3.01776 | pb | 0.7469201 | 0.185074 | pc |
| PF11_0200 | PKH_091670 | PVX_091600 | PY04677 | PBANKA_092880 | PCHAS_091550 | 2.3012  | 2.89918 | 2.00278 | 2.72619 | 2.04342 | 0.69633 | 0.53067 | 0.3158341 | 0.69633 | pc | 0.2452979 | 2.899179 | pk |
| PF11_0202 | PKH_091690 | PVX_091610 | PY05839 | PBANKA_092860 | PCHAS_091570 | 2.71761 | 0.53295 | 3.26963 | 5.62183 | 3.36451 | 2.45095 | 1.09241 | 0.7300474 | 5.62183 | py | 0.7508347 | 3.364509 | pb |
| PF11_0203 | PKH_091700 | PVX_091615 | PY05838 | PBANKA_092850 | PCHAS_091580 | 2.35933 | 2.19036 | 2.17186 | 0.95625 | 0.69122 | 2.12741 | 0.49111 | 0.2932072 | 0.69122 | pb | 0.3553961 | 2.12741  | pc |
| PF11_0212 | PKH_091790 | PVX_091655 | PY00891 | PBANKA_092780 | PCHAS_091650 | 1.73664 | 1.21713 | 3.68657 | 1.86392 | 2.11843 | 1.94883 | 0.48936 | 0.2226983 | 3.68657 | pv | 0.2783728 | 1.863915 | py |
| PF11_0213 | PKH_091800 | PVX_091660 | PY00892 | PBANKA_092770 | PCHAS_091660 | 3.72499 | 4.35259 | 0.09676 | 5.18619 | 1.22079 | 4.37899 | 1.10226 | 0.6977116 | 1.22079 | pb | 0.8721395 | 4.378986 | pc |
| PF11_0216 | PKH_091830 | PVX_091665 | PY03576 | PBANKA_092740 | PCHAS_091690 | 3.63878 | 4.72275 | 4.80929 | 5.62433 | 4.68955 | 6.03371 | 0.56938 | 0.4491486 | 3.63878 | pf | 0.5398004 | 4.722754 | pk |
| PF11_0217 | PKH_091840 | PVX_091670 | PY03577 | PBANKA_092730 | PCHAS_091700 | 5.27403 | 5.64995 | 0.11054 | 5.55327 | 5.83411 | 5.40891 | 0.2736  | 0.1602235 | 0.11054 | pv | 0.2002794 | 5.553267 | py |
| PF11_0218 | PKH_091850 | PVX_091675 | PY03578 | PBANKA_092720 | PCHAS_091710 | 5.54035 | 3.86156 | 1.77611 | 2.18515 | 5.66215 | 1.92554 | 1.26    | 0.9783264 | 5.54035 | pf | 0.7389035 | 3.861562 | pk |
| PF11_0220 | PKH_091870 | PVX_091685 | PY07273 | PBANKA_092700 | PCHAS_091730 | 4.95355 | 5.21075 | 5.1278  | 4.29946 | 4.74058 | 5.16872 | 0.25228 | 0.1370677 | 4.29946 | py | 0.0745306 | 4.740583 | pb |
| PF11_0222 | PKH_091880 | PVX_091690 | PY03942 | PBANKA_092690 | PCHAS_091740 | 5.92252 | 3.54417 | 5.3689  | 6.17899 | 5.33304 | 1.1867  | 0.88755 | 0.5893874 | 3.54417 | pk | 0.5983285 | 5.368898 | pv |
| PF11_0223 | PKH_091890 | PVX_091695 | PY03941 | PBANKA_092680 | PCHAS_091750 | 4.36835 | 3.12735 | 5.16261 | 5.75705 | 2.4107  | 2.82039 | 1.15493 | 0.8599741 | 5.75705 | py | 0.8958058 | 2.4107   | pb |
| PF11_0224 | PKH_091900 | PVX_091700 | PY04421 | PBANKA_092670 | PCHAS_091760 | 2.03595 | 5.5861  | 5.16506 | 6.05371 | 6.25334 | 4.78863 | 0.84773 | 0.4706712 | 2.03595 | pf | 0.588339  | 5.5861   | pk |
| PF11_0225 | PKH_091910 | PVX_091705 | PY06050 | PBANKA_092660 | PCHAS_091770 | 1.84747 | 3.13198 | 2.47576 | 1.59034 | 2.30731 | 2.77105 | 0.43895 | 0.3618009 | 3.13198 | pk | 0.4101387 | 2.475765 | pv |
| PF11_0229 | PKH_091950 | PVX_091725 | PY06965 | PBANKA_092620 | PCHAS_091810 | 4.1266  | 4.07124 | 3.56495 | 3.07697 | 3.53364 | 4.33577 | 0.39301 | 0.2727533 | 3.07697 | py | 0.2065429 | 3.533645 | pb |

|           |            |            |         |                   |                  |         |         |         |         |         |         |         |           |         |    |           |          |    |
|-----------|------------|------------|---------|-------------------|------------------|---------|---------|---------|---------|---------|---------|---------|-----------|---------|----|-----------|----------|----|
| PF11_0230 | PKH_091960 | PVX_091730 | PY05603 | PBANKA_092<br>610 | PCHAS_09182<br>0 | 0.9108  | 3.86752 | 1.78799 | 5.10252 | 2.61021 | 1.75565 | 1.12999 | 0.7622568 | 5.10252 | py | 0.7472663 | 2.610206 | pb |
| PF11_0240 | PKH_092040 | PVX_091760 | PY00078 | PBANKA_092<br>540 | PCHAS_09190<br>0 | 1.5049  | 3.80833 | 6.02367 | 4.31055 | 0.00944 | 1.72548 | 1.32447 | 1.0925075 | 3.80833 | pk | 1.1304219 | 6.023666 | pv |
| PF11_0242 | PKH_092060 | PVX_091770 | PY00029 | PBANKA_092<br>520 | PCHAS_09192<br>0 | 6.06605 | 3.30264 | 3.0701  | 2.10791 | 1.90348 | 1.96116 | 0.80552 | 0.5016196 | 6.06605 | pf | 0.3283418 | 3.302641 | pk |
| PF11_0244 | PKH_092080 | PVX_091780 | PY06314 | PBANKA_092<br>500 | PCHAS_09194<br>0 | 3.91268 | 0.01774 | 5.00137 | 1.85741 | 4.72871 | 3.37273 | 1.14803 | 0.803377  | 1.85741 | py | 1.0042212 | 4.728706 | pb |
| PF11_0245 | PKH_092090 | PVX_091785 | PY04385 | PBANKA_092<br>490 | PCHAS_09195<br>0 | 2.36995 | 1.99035 | 3.28029 | 1.56097 | 2.86895 | 1.86077 | 0.51785 | 0.3634306 | 3.28029 | pv | 0.3469437 | 1.560973 | py |
| PF11_0247 | PKH_092110 | PVX_091795 | PY01452 | PBANKA_092<br>470 | PCHAS_09197<br>0 | 1.7233  | 2.91804 | 2.67798 | 0.41955 | 2.26301 | 2.1355  | 0.59678 | 0.3474428 | 0.41955 | py | 0.4343035 | 2.263005 | pb |
| PF11_0248 | PKH_092120 | PVX_091800 | PY01451 | PBANKA_092<br>460 | PCHAS_09198<br>0 | 3.85019 | 3.41482 | 3.02956 | 5.57769 | 3.22635 | 3.2627  | 0.55401 | 0.2018201 | 5.57769 | py | 0.2431856 | 3.226346 | pb |
| PF11_0249 | PKH_092130 | PVX_091805 | PY01450 | PBANKA_092<br>450 | PCHAS_09199<br>0 | 4.38731 | 5.06239 | 4.72286 | 4.34751 | 4.99715 | 4.81079 | 0.23544 | 0.1898743 | 4.34751 | py | 0.1907528 | 4.997154 | pb |
| PF11_0250 | PKH_092140 | PVX_091810 | PY03136 | PBANKA_092<br>440 | PCHAS_09200<br>0 | 1.85098 | 1.47929 | 1.91463 | 6.12166 | 0.86976 | 0.88138 | 0.60921 | 0.4028934 | 6.12166 | py | 0.351232  | 0.869755 | pb |
| PF11_0251 | PKH_092150 | PVX_091815 | PY07009 | PBANKA_092<br>430 | PCHAS_09201<br>0 | 5.14126 | 4.85535 | 5.40822 | 0.16889 | 5.12016 | 3.56446 | 0.57693 | 0.376956  | 3.56446 | pc | 0.1434908 | 0.168889 | py |
| PF11_0252 | PKH_092160 | PVX_091820 | PY01158 | PBANKA_092<br>420 | PCHAS_09202<br>0 | 2.90553 | 2.69313 | 2.58417 | 2.58587 | 2.71012 | 0.95947 | 0.36321 | 0.0891216 | 0.95947 | pc | 0.0583007 | 2.90553  | pf |
| PF11_0254 | PKH_092180 | PVX_091830 | PY05246 | PBANKA_092<br>400 | PCHAS_09204<br>0 | 2.74678 | 2.79735 | 5.12302 | 5.95738 | 6.09439 | 0.76429 | 1.33053 | 0.999409  | 2.79735 | pk | 1.006419  | 5.123021 | pv |
| PF11_0259 | PKH_092230 | PVX_091855 | PY00816 | PBANKA_092<br>350 | PCHAS_09209<br>0 | 1.89436 | 1.58567 | 1.79923 | 1.2759  | 0.81451 | 1.73382 | 0.29189 | 0.1664046 | 0.81451 | pb | 0.2080057 | 1.733817 | pc |
| PF11_0261 | PKH_092260 | PVX_091870 | PY03512 | PBANKA_092<br>330 | PCHAS_09211<br>0 | 4.66435 | 3.3227  | 4.61828 | 5.36812 | 4.20083 | 4.38293 | 0.45738 | 0.2897421 | 3.3227  | pk | 0.3621777 | 4.618284 | pv |
| PF11_0262 | PKH_092270 | PVX_091875 | PY03513 | PBANKA_092<br>320 | PCHAS_09212<br>0 | 4.12343 | 3.25939 | 3.90214 | 4.93038 | 4.3372  | 3.25996 | 0.49492 | 0.3882563 | 4.93038 | py | 0.3765556 | 4.337198 | pb |
| PF11_0265 | PKH_092300 | PVX_091890 | PY06558 | PBANKA_092<br>290 | PCHAS_09215<br>0 | 2.22417 | 2.43402 | 1.81267 | 1.78232 | 1.79592 | 2.85389 | 0.35353 | 0.2159889 | 2.85389 | pc | 0.1146494 | 2.434017 | pk |
| PF11_0267 | PKH_092330 | PVX_091905 | PY00272 | PBANKA_092<br>260 | PCHAS_09218<br>0 | 6.11988 | 6.16839 | 5.76363 | 5.45671 | 5.82313 | 5.59973 | 0.21522 | 0.1849824 | 5.45671 | py | 0.231228  | 5.823131 | pb |
| PF11_0268 | PKH_092340 | PVX_091910 | PY00275 | PBANKA_092<br>250 | PCHAS_09219<br>0 | 6.15443 | 0.1634  | 5.90036 | 3.21604 | 5.40386 | 4.61933 | 0.87702 | 0.515566  | 3.21604 | py | 0.5203345 | 5.403864 | pb |
| PF11_0269 | PKH_092350 | PVX_091915 | PY06958 | PBANKA_092<br>240 | PCHAS_09220<br>0 | 1.49706 | 4.25184 | 3.72512 | 5.18035 | 3.33971 | 4.18457 | 0.84248 | 0.4734713 | 1.49706 | pf | 0.5750213 | 4.25184  | pk |
| PF11_0270 | PKH_092360 | PVX_091920 | PY06957 | PBANKA_092<br>230 | PCHAS_09221<br>0 | 2.71334 | 3.17019 | 2.89916 | 5.93109 | 2.28993 | 2.56964 | 0.71254 | 0.2419567 | 5.93109 | py | 0.1965945 | 2.289934 | pb |
| PF11_0272 | PKH_092380 | PVX_091925 | PY07508 | PBANKA_092<br>210 | PCHAS_09223<br>0 | 2.06595 | 1.984   | 2.54561 | 2.33476 | 2.87498 | 1.70393 | 0.33358 | 0.2384857 | 2.87498 | pb | 0.2076034 | 1.703932 | pc |
| PF11_0275 | PKH_092410 | PVX_091940 | PY05911 | PBANKA_092<br>190 | PCHAS_09225<br>0 | 1.78788 | 1.52437 | 1.64716 | 1.40713 | 1.03356 | 1.5712  | 0.17353 | 0.1007074 | 1.03356 | pb | 0.1258842 | 1.571204 | pc |



|           |            |            |         |               |              |         |         |         |         |         |         |         |           |         |    |           |          |    |
|-----------|------------|------------|---------|---------------|--------------|---------|---------|---------|---------|---------|---------|---------|-----------|---------|----|-----------|----------|----|
| PF11_0276 | PKH_092420 | PVX_091945 | PY04938 | PBANKA_092180 | PCHAS_092260 | 2.21777 | 1.22953 | 0.68388 | 1.36411 | 6.27713 | 5.96134 | 0.74257 | 0.5843089 | 2.21777 | pf | 0.5939717 | 1.229533 | pk |
| PF11_0277 | PKH_092430 | PVX_091950 | PY04937 | PBANKA_092170 | PCHAS_092270 | 5.93035 | 6.12144 | 5.17247 | 0.01224 | 5.76473 | 5.97291 | 0.25371 | 0.1443579 | 5.17247 | pv | 0.0998186 | 0.012238 | py |
| PF11_0281 | PKH_092470 | PVX_091965 | PY02121 | PBANKA_092140 | PCHAS_092300 | 1.36335 | 0.54253 | 1.12904 | 0.01808 | 6.13117 | 5.03446 | 0.73626 | 0.5252664 | 5.03446 | pc | 0.4513763 | 1.363354 | pf |
| PF11_0282 | PKH_092480 | PVX_091970 | PY05536 | PBANKA_092130 | PCHAS_092310 | 3.90442 | 4.11573 | 4.06516 | 5.09264 | 3.9846  | 4.2205  | 0.24578 | 0.0894429 | 5.09264 | py | 0.0916644 | 3.984598 | pb |
| PF11_0284 | PKH_092500 | PVX_091980 | PY05818 | PBANKA_092110 | PCHAS_092330 | 2.02755 | 2.40465 | 2.74666 | 5.79621 | 2.45141 | 1.93729 | 0.68747 | 0.2466445 | 5.79621 | py | 0.296614  | 2.451412 | pb |
| PF11_0289 | PKH_092550 | PVX_092000 | PY03552 | PBANKA_092060 | PCHAS_092380 | 2.4895  | 3.86557 | 3.95053 | 1.00531 | 1.14796 | 1.65372 | 1.0831  | 0.8403609 | 3.95053 | pv | 0.8883478 | 1.005306 | py |
| PF11_0290 | PKH_092560 | PVX_092005 | PY02161 | PBANKA_092050 | PCHAS_092390 | 6.19958 | 5.68186 | 5.94121 | 5.98945 | 5.48914 | 5.66972 | 0.21492 | 0.1543607 | 6.19958 | pf | 0.1929509 | 5.681864 | pk |
| PF11_0291 | PKH_092570 | PVX_092010 | PY02741 | PBANKA_092040 | PCHAS_092400 | 0.91216 | 6.16015 | 6.13237 | 1.90713 | 0.31665 | 0.28541 | 0.52073 | 0.3005313 | 1.90713 | py | 0.3678554 | 0.316645 | pb |
| PF11_0293 | PKH_092610 | PVX_092030 | PY05916 | PBANKA_092000 | PCHAS_092440 | 2.33185 | 3.33477 | 2.96972 | 3.46376 | 3.20795 | 3.48717 | 0.29603 | 0.1546518 | 2.33185 | pf | 0.1933148 | 3.334768 | pk |
| PF11_0294 | PKH_092620 | PVX_092035 | PY05918 | PBANKA_091990 | PCHAS_092450 | 1.93195 | 3.40322 | 6.23113 | 0.4513  | 0.00172 | 1.24197 | 1.02936 | 0.644853  | 3.40322 | pk | 0.6802271 | 6.231126 | pv |
| PF11_0295 | PKH_092630 | PVX_092040 | PY05919 | PBANKA_091980 | PCHAS_092460 | 3.3737  | 3.67516 | 3.93017 | 4.61916 | 3.51368 | 6.07619 | 0.67716 | 0.3323913 | 6.07619 | pc | 0.1794893 | 4.61916  | py |
| PF11_0296 | PKH_092640 | PVX_092045 | PY03468 | PBANKA_091970 | PCHAS_092470 | 1.90215 | 2.35823 | 2.35138 | 0.55848 | 3.00783 | 1.93746 | 0.55322 | 0.3052892 | 0.55848 | py | 0.2175006 | 3.007826 | pb |
| PF11_0297 | PKH_092650 | PVX_092050 | PY03469 | PBANKA_091960 | PCHAS_092480 | 0.65434 | 4.35612 | 5.41542 | 5.82275 | 3.71446 | 3.55208 | 1.09217 | 0.7943266 | 0.65434 | pf | 0.9929082 | 4.356124 | pk |
| PF11_0300 | PKH_092670 | PVX_092060 | PY02856 | PBANKA_091940 | PCHAS_092500 | 5.52275 | 5.77174 | 5.78898 | 5.1065  | 5.66135 | 5.53862 | 0.1757  | 0.0998695 | 5.1065  | py | 0.1248368 | 5.661355 | pb |
| PF11_0301 | PKH_092680 | PVX_092065 | PY04977 | PBANKA_091930 | PCHAS_092510 | 3.01683 | 2.65993 | 2.20453 | 2.57712 | 2.15    | 1.19453 | 0.4508  | 0.2644465 | 1.19453 | pc | 0.2206314 | 3.016827 | pf |
| PF11_0303 | PKH_092700 | PVX_092075 | PY06923 | PBANKA_091900 | PCHAS_092710 | 4.00291 | 4.33211 | 3.6556  | 3.56505 | 3.49943 | 3.47782 | 0.24139 | 0.1362511 | 4.33211 | pk | 0.1476762 | 3.655601 | pv |
| PF11_0304 | PKH_092710 | PVX_092080 | PY06922 | PBANKA_091890 | PCHAS_092720 | 5.54819 | 5.94688 | 5.28542 | 5.89481 | 4.73328 | 5.02281 | 0.3914  | 0.3066935 | 4.73328 | pb | 0.2520222 | 5.02281  | pc |
| PF11_0305 | PKH_092720 | PVX_092085 | PY05667 | PBANKA_091880 | PCHAS_092730 | 1.98629 | 1.53174 | 2.15708 | 2.44197 | 1.43658 | 1.816   | 0.30017 | 0.23501   | 2.44197 | py | 0.1989065 | 1.436581 | pb |
| PF11_0306 | PKH_092730 | PVX_092090 | PY05666 | PBANKA_091870 | PCHAS_092740 | 3.32062 | 1.03611 | 3.35286 | 5.28288 | 3.88811 | 4.17877 | 0.94003 | 0.5576334 | 1.03611 | pk | 0.5632294 | 3.352864 | pv |
| PF11_0309 | PKH_092750 | PVX_092100 | PY05171 | PBANKA_091840 | PCHAS_092770 | 1.73286 | 5.24577 | 1.6544  | 5.10732 | 3.52536 | 3.01936 | 1.24531 | 1.0490834 | 5.24577 | pk | 0.9701149 | 1.6544   | pv |
| PF11_0310 | PKH_092760 | PVX_092105 | PY02129 | PBANKA_091830 | PCHAS_092780 | 2.14659 | 4.62632 | 5.20576 | 2.10635 | 2.08601 | 6.06949 | 1.33334 | 0.98012   | 5.20576 | pv | 1.22515   | 2.106347 | py |
| PF11_0311 | PKH_092770 | PVX_092110 | PY02130 | PBANKA_091820 | PCHAS_092790 | 2.92362 | 3.52621 | 3.58592 | 0.51611 | 1.30654 | 3.28805 | 0.94232 | 0.5763928 | 0.51611 | py | 0.2251139 | 1.306538 | pb |

|           |            |            |         |                   |                  |         |         |         |         |         |         |         |           |         |    |           |          |    |
|-----------|------------|------------|---------|-------------------|------------------|---------|---------|---------|---------|---------|---------|---------|-----------|---------|----|-----------|----------|----|
| PF11_0313 | PKH_092790 | PVX_092120 | PY00659 | PBANKA_091<br>800 | PCHAS_09281<br>0 | 2.48292 | 1.89053 | 2.51419 | 2.66043 | 2.19519 | 1.17257 | 0.39987 | 0.2177799 | 1.17257 | pc | 0.2278479 | 2.660427 | py |
| PF11_0314 | PKH_092800 | PVX_092125 | PY00657 | PBANKA_091<br>790 | PCHAS_09282<br>0 | 4.08288 | 4.33638 | 3.46327 | 2.59302 | 2.74882 | 3.89564 | 0.58496 | 0.4414321 | 2.59302 | py | 0.2650858 | 2.748823 | pb |
| PF11_0315 | PKH_092810 | PVX_092130 | PY00656 | PBANKA_091<br>780 | PCHAS_09283<br>0 | 4.30985 | 3.29351 | 2.92888 | 5.27524 | 2.19477 | 2.05235 | 0.95044 | 0.6712504 | 5.27524 | py | 0.6555354 | 2.194767 | pb |
| PF11_0316 | PKH_092820 | PVX_092135 | PY00654 | PBANKA_091<br>770 | PCHAS_09284<br>0 | 1.76879 | 2.67866 | 2.33065 | 2.34913 | 1.09971 | 1.96242 | 0.42125 | 0.2593147 | 1.09971 | pb | 0.2320858 | 1.962422 | pc |
| PF11_0319 | PKH_092850 | PVX_092150 | PY01166 | PBANKA_091<br>730 | PCHAS_09287<br>0 | 3.14274 | 3.31085 | 2.52775 | 0.95723 | 1.75805 | 1.51779 | 0.79138 | 0.6355508 | 0.95723 | py | 0.6020129 | 1.758046 | pb |
| PF11_0322 | PKH_092880 | PVX_092165 | PY06085 | PBANKA_091<br>700 | PCHAS_09290<br>0 | 1.30478 | 3.43197 | 6.00018 | 1.63043 | 2.9581  | 0.34982 | 1.10815 | 0.9043452 | 3.43197 | pk | 0.7334839 | 6.000177 | pv |
| PF11_0336 | PKH_093040 | PVX_092235 | PY05953 | PBANKA_091<br>580 | PCHAS_09302<br>0 | 1.71055 | 2.74121 | 2.5076  | 2.49592 | 1.48567 | 0.99945 | 0.59151 | 0.4105177 | 0.99945 | pc | 0.4518236 | 2.741211 | pk |
| PF11_0337 | PKH_093050 | PVX_092240 | PY05952 | PBANKA_091<br>570 | PCHAS_09303<br>0 | 2.83686 | 4.17743 | 3.51826 | 5.20338 | 3.7239  | 4.52109 | 0.63715 | 0.4686809 | 5.20338 | py | 0.5858511 | 3.723904 | pb |
| PF11_0338 | PKH_093060 | PVX_092245 | PY05950 | PBANKA_091<br>560 | PCHAS_09304<br>0 | 4.985   | 5.92227 | 5.17164 | 5.70339 | 5.21062 | 4.93528 | 0.29073 | 0.1987451 | 5.92227 | pk | 0.2484313 | 5.171644 | pv |
| PF11_0339 | PKH_093070 | PVX_092250 | PY05949 | PBANKA_091<br>550 | PCHAS_09305<br>0 | 3.72729 | 1.7603  | 2.55827 | 3.88048 | 3.78507 | 2.31607 | 0.79303 | 0.5582403 | 1.7603  | pk | 0.4055463 | 2.558271 | pv |
| PF11_0341 | PKH_093080 | PVX_092260 | PY01034 | PBANKA_091<br>530 | PCHAS_09307<br>0 | 1.45586 | 1.34854 | 1.92647 | 2.08508 | 0.5665  | 2.46197 | 0.5171  | 0.3485299 | 0.5665  | pb | 0.3017863 | 2.461974 | pc |
| PF11_0342 | PKH_093090 | PVX_092265 | PY01035 | PBANKA_091<br>520 | PCHAS_09308<br>0 | 4.39925 | 4.48163 | 4.63104 | 3.23752 | 4.79447 | 5.3607  | 0.44464 | 0.2548581 | 3.23752 | py | 0.2777165 | 4.794469 | pb |
| PF11_0344 | PKH_093110 | PVX_092275 | PY01581 | PBANKA_091<br>500 | PCHAS_09310<br>0 | 5.99444 | 0.06581 | 6.03005 | 5.3188  | 5.89577 | 5.80518 | 0.22562 | 0.1356185 | 5.3188  | py | 0.144855  | 5.895771 | pb |
| PF11_0345 | PKH_093120 | PVX_092280 | PY01582 | PBANKA_091<br>490 | PCHAS_09311<br>0 | 4.06874 | 3.14462 | 2.2009  | 6.09718 | 3.27489 | 2.72253 | 0.89546 | 0.4840413 | 6.09718 | py | 0.5724822 | 3.274893 | pb |
| PF11_0347 | PKH_093140 | PVX_092290 | PY00240 | PBANKA_091<br>470 | PCHAS_09313<br>0 | 1.04816 | 2.76833 | 2.45263 | 2.87575 | 2.80512 | 2.06772 | 0.48011 | 0.2321027 | 1.04816 | pf | 0.2901283 | 2.768331 | pk |
| PF11_0348 | PKH_093150 | PVX_092300 | PY05313 | PBANKA_091<br>460 | PCHAS_09314<br>0 | 4.12665 | 5.21373 | 6.14159 | 2.73778 | 3.26483 | 1.40638 | 1.3455  | 1.0392448 | 6.14159 | pv | 1.1672925 | 2.737778 | py |
| PF11_0349 | PKH_093180 | PVX_092305 | PY05311 | PBANKA_091<br>450 | PCHAS_09315<br>0 | 1.4451  | 1.84752 | 4.18149 | 2.31282 | 3.56285 | 5.65328 | 1.23241 | 0.8903442 | 5.65328 | pc | 0.6457634 | 4.181488 | pv |
| PF11_0351 | PKH_093190 | PVX_092310 | PY06981 | PBANKA_091<br>440 | PCHAS_09316<br>0 | 2.89385 | 2.52933 | 2.33349 | 2.57189 | 2.50968 | 2.04635 | 0.18426 | 0.1245139 | 2.04635 | pc | 0.0645111 | 2.893851 | pf |
| PF11_0352 | PKH_093200 | PVX_092315 | PY06980 | PBANKA_091<br>430 | PCHAS_09317<br>0 | 4.15897 | 4.39043 | 3.35427 | 3.35716 | 3.66935 | 3.96406 | 0.35545 | 0.2823182 | 4.39043 | pk | 0.2741285 | 3.354274 | pv |
| PF11_0353 | PKH_093210 | PVX_092320 | PY01922 | PBANKA_091<br>420 | PCHAS_09318<br>0 | 1.73469 | 1.36691 | 1.92219 | 0.7222  | 0.17957 | 2.7282  | 0.68607 | 0.5510208 | 2.7282  | pc | 0.3919409 | 0.179574 | pb |
| PF11_0354 | PKH_093220 | PVX_092325 | PY01923 | PBANKA_091<br>410 | PCHAS_09319<br>0 | 5.09283 | 4.88097 | 5.01139 | 5.39488 | 4.27935 | 5.29583 | 0.26864 | 0.1596716 | 4.27935 | pb | 0.1488395 | 5.295832 | pc |
| PF11_0358 | PKH_093260 | PVX_092345 | PY05002 | PBANKA_091<br>380 | PCHAS_09322<br>0 | 1.42291 | 2.88017 | 1.51139 | 5.1016  | 1.5843  | 2.39956 | 0.85189 | 0.469087  | 5.1016  | py | 0.5863588 | 1.584301 | pb |



|             |            |            |         |               |              |         |         |         |         |         |         |         |           |         |    |           |          |    |
|-------------|------------|------------|---------|---------------|--------------|---------|---------|---------|---------|---------|---------|---------|-----------|---------|----|-----------|----------|----|
| PF11_0359   | PKH_093270 | PVX_092350 | PY00471 | PBANKA_091370 | PCHAS_093230 | 1.36387 | 4.01135 | 3.62814 | 5.74149 | 3.42447 | 2.61746 | 0.99586 | 0.7316314 | 5.74149 | py | 0.9145393 | 3.424471 | pb |
| PF11_0360   | PKH_093280 | PVX_092355 | PY00472 | PBANKA_091360 | PCHAS_093240 | 5.25931 | 4.45968 | 6.05939 | 5.259   | 0.25308 | 2.68384 | 0.90874 | 0.5753924 | 2.68384 | pc | 0.4000032 | 0.253078 | pb |
| PF11_0365   | PKH_093340 | PVX_092390 | PY03003 | PBANKA_091310 | PCHAS_071440 | 4.15058 | 3.83501 | 3.67548 | 5.38075 | 2.27035 | 3.20176 | 0.70312 | 0.5026951 | 5.38075 | py | 0.2770882 | 2.270355 | pb |
| PF11_0369   | PKH_093370 | PVX_092405 | PY03008 | PBANKA_091280 | PCHAS_071410 | 2.20629 | 1.7678  | 2.60521 | 1.0743  | 0.70532 | 4.28618 | 0.92504 | 0.6063753 | 4.28618 | pc | 0.4923511 | 0.705324 | pb |
| PF11_0370   | PKH_093380 | PVX_092410 | PY03009 | PBANKA_091270 | PCHAS_071400 | 4.72916 | 5.05069 | 3.62931 | 4.76334 | 3.38723 | 3.76647 | 0.6267  | 0.4836494 | 3.38723 | pb | 0.363889  | 3.766473 | pc |
| PF11_0372   | PKH_093400 | PVX_092420 | PY01226 | PBANKA_091250 | PCHAS_071380 | 3.61905 | 0.11083 | 0.88814 | 4.41033 | 6.14736 | 5.86326 | 0.97001 | 0.6583505 | 3.61905 | pf | 0.761275  | 0.110828 | pk |
| PF11_0373   | PKH_093410 | PVX_092425 | PY01227 | PBANKA_091240 | PCHAS_071370 | 5.72962 | 6.27752 | 5.92451 | 3.09223 | 6.0856  | 5.99979 | 0.60276 | 0.1417991 | 3.09223 | py | 0.1557959 | 6.085602 | pb |
| PF11_0374   | PKH_093420 | PVX_092430 | PY01228 | PBANKA_091230 | PCHAS_071360 | 2.63074 | 2.65781 | 2.49555 | 3.08193 | 2.01628 | 2.63599 | 0.20553 | 0.1226884 | 2.01628 | pb | 0.1533605 | 2.635988 | pc |
| PF11_0375   | PKH_093430 | PVX_092435 | PY01229 | PBANKA_091220 | PCHAS_071350 | 0.72337 | 2.83546 | 2.55143 | 1.50551 | 2.4789  | 2.10415 | 0.58879 | 0.3554462 | 0.72337 | pf | 0.3551684 | 2.835461 | pk |
| PF11_0377-a | PKH_093440 | PVX_092440 | PY06011 | PBANKA_091210 | PCHAS_071340 | 5.33858 | 6.02398 | 5.32615 | 3.46484 | 3.93788 | 4.77255 | 0.75224 | 0.5304258 | 3.46484 | py | 0.3159641 | 3.937876 | pb |
| PF11_0378   | PKH_093450 | PVX_092445 | PY05749 | PBANKA_091200 | PCHAS_071330 | 1.27762 | 1.55178 | 1.63892 | 1.95203 | 0.9347  | 2.16732 | 0.33236 | 0.2579883 | 0.9347  | pb | 0.1903863 | 2.167315 | pc |
| PF11_0380   | PKH_093470 | PVX_092455 | PY05753 | PBANKA_091180 | PCHAS_071310 | 1.86912 | 3.96737 | 2.57335 | 2.50619 | 2.88615 | 0.78339 | 0.71136 | 0.4956418 | 0.78339 | pc | 0.2710476 | 3.967366 | pk |
| PF11_0382   | PKH_093490 | PVX_092465 | PY01220 | PBANKA_091160 | PCHAS_071290 | 1.91165 | 3.33007 | 3.71232 | 3.2256  | 3.53608 | 3.83335 | 0.43574 | 0.1980002 | 1.91165 | pf | 0.1959987 | 3.330073 | pk |
| PF11_0383   | PKH_093500 | PVX_092470 | PY01218 | PBANKA_091150 | PCHAS_071280 | 5.79461 | 6.05742 | 5.38261 | 4.58959 | 5.51354 | 5.80889 | 0.36253 | 0.1940317 | 4.58959 | py | 0.1722717 | 5.513539 | pb |
| PF11_0385   | PKH_093520 | PVX_092485 | PY01216 | PBANKA_091130 | PCHAS_071260 | 3.0752  | 2.11762 | 1.78664 | 3.60017 | 3.18288 | 6.26403 | 0.99553 | 0.5757589 | 6.26403 | pc | 0.5884571 | 3.600169 | py |
| PF11_0386   | PKH_093530 | PVX_092490 | PY02435 | PBANKA_091120 | PCHAS_071250 | 4.4748  | 3.80642 | 3.6827  | 3.25481 | 4.3063  | 4.42076 | 0.40966 | 0.2812882 | 3.25481 | py | 0.3516103 | 4.306305 | pb |
| PF11_0393   | PKH_093590 | PVX_092520 | PY06420 | PBANKA_091060 | PCHAS_071190 | 1.35269 | 2.96092 | 3.13623 | 0.34258 | 3.83385 | 1.43912 | 1.13277 | 0.835654  | 0.34258 | py | 0.8263363 | 3.833846 | pb |
| PF11_0396   | PKH_093630 | PVX_092540 | PY06845 | PBANKA_091020 | PCHAS_071150 | 0.09309 | 4.02718 | 3.73325 | 1.94128 | 1.8108  | 2.50761 | 1.07048 | 0.8016691 | 0.09309 | pf | 0.622194  | 4.027178 | pk |
| PF11_0403   | PKH_093680 | PVX_092565 | PY05865 | PBANKA_090970 | PCHAS_071100 | 2.23838 | 1.49833 | 2.5595  | 0.40327 | 2.83368 | 1.44378 | 0.71436 | 0.4902131 | 0.40327 | py | 0.4639407 | 2.833682 | pb |
| PF11_0404   | PKH_093690 | PVX_092570 | PY00769 | PBANKA_090960 | PCHAS_071090 | 2.16278 | 0.9673  | 2.09794 | 2.0703  | 2.25541 | 1.60205 | 0.31274 | 0.149165  | 0.9673  | pk | 0.1864563 | 2.097941 | pv |
| PF11_0412   | PKH_093750 | PVX_092600 | PY00743 | PBANKA_090890 | PCHAS_071020 | 3.17084 | 3.59385 | 3.332   | 1.16282 | 2.62071 | 1.10488 | 0.86805 | 0.6284651 | 1.10488 | pc | 0.2835763 | 1.162819 | py |
| PF11_0414   | PKH_093770 | PVX_092610 | PY00531 | PBANKA_090870 | PCHAS_071000 | 4.58259 | 3.96998 | 1.00055 | 5.28798 | 4.20738 | 4.86566 | 0.77957 | 0.3952561 | 1.00055 | pv | 0.3177213 | 5.287985 | py |

|           |            |            |         |                   |                  |         |         |         |         |         |         |         |           |         |    |           |          |    |
|-----------|------------|------------|---------|-------------------|------------------|---------|---------|---------|---------|---------|---------|---------|-----------|---------|----|-----------|----------|----|
| PF11_0415 | PKH_093780 | PVX_092615 | PY00530 | PBANKA_090<br>860 | PCHAS_07099<br>0 | 5.57777 | 5.88401 | 5.90368 | 5.11277 | 5.53395 | 5.35574 | 0.22717 | 0.1795985 | 5.11277 | py | 0.2135444 | 5.533953 | pb |
| PF11_0416 | PKH_093790 | PVX_092620 | PY00529 | PBANKA_090<br>850 | PCHAS_07098<br>0 | 6.24431 | 5.77848 | 6.01604 | 4.79047 | 4.46731 | 3.0822  | 0.94981 | 0.6005116 | 3.0822  | pc | 0.6341814 | 6.244308 | pf |
| PF11_0420 | PKH_093830 | PVX_092640 | PY05531 | PBANKA_090<br>810 | PCHAS_07094<br>0 | 4.49235 | 4.61411 | 5.57728 | 0.09464 | 3.34735 | 4.26554 | 0.744   | 0.5156988 | 0.09464 | py | 0.3583748 | 3.347353 | pb |
| PF11_0424 | PKH_093870 | PVX_092670 | PY06250 | PBANKA_090<br>770 | PCHAS_07090<br>0 | 4.7443  | 4.98722 | 5.60876 | 4.18884 | 5.50511 | 5.1251  | 0.38644 | 0.2764693 | 4.18884 | py | 0.2505845 | 5.50511  | pb |
| PF11_0429 | PKH_093920 | PVX_092695 | PY03412 | PBANKA_090<br>720 | PCHAS_07084<br>0 | 5.18006 | 6.06944 | 5.50047 | 5.64779 | 5.07523 | 5.45265 | 0.25163 | 0.1785935 | 6.06944 | pk | 0.2112862 | 5.500468 | pv |
| PF11_0431 | PKH_093930 | PVX_092700 | PY03535 | PBANKA_090<br>710 | PCHAS_07083<br>0 | 0.50304 | 3.48332 | 0.5996  | 0.53042 | 0.33213 | 2.70633 | 0.90394 | 0.4941518 | 3.48332 | pk | 0.6003968 | 0.599595 | pv |
| PF11_0432 | PKH_093940 | PVX_092705 | PY03536 | PBANKA_090<br>700 | PCHAS_07082<br>0 | 3.13321 | 2.06036 | 2.50577 | 1.93968 | 2.32728 | 2.40804 | 0.28662 | 0.1827545 | 3.13321 | pf | 0.1617137 | 2.060362 | pk |
| PF11_0433 | PKH_093950 | PVX_092710 | PY03538 | PBANKA_090<br>690 | PCHAS_07081<br>0 | 0.22572 | 6.17349 | 5.32688 | 1.6879  | 1.94963 | 1.81174 | 1.04826 | 0.729069  | 5.32688 | pv | 0.9113362 | 1.687905 | py |
| PF11_0435 | PKH_093970 | PVX_092720 | PY05500 | PBANKA_090<br>670 | PCHAS_07079<br>0 | 4.83265 | 4.22276 | 4.79152 | 3.98105 | 3.64573 | 5.83412 | 0.60146 | 0.399479  | 5.83412 | pc | 0.3550916 | 3.645732 | pb |
| PF11_0436 | PKH_093980 | PVX_092725 | PY05501 | PBANKA_090<br>660 | PCHAS_07078<br>0 | 1.71872 | 1.33391 | 2.13766 | 4.45976 | 4.1549  | 1.76054 | 0.98986 | 0.6479861 | 4.45976 | py | 0.2113931 | 4.1549   | pb |
| PF11_0438 | PKH_094000 | PVX_092735 | PY05736 | PBANKA_090<br>640 | PCHAS_07076<br>0 | 2.13504 | 2.02586 | 2.36249 | 3.20551 | 2.13159 | 1.06192 | 0.41394 | 0.2821078 | 1.06192 | pc | 0.0850175 | 3.205509 | py |
| PF11_0443 | PKH_094070 | PVX_092765 | PY01970 | PBANKA_090<br>580 | PCHAS_07070<br>0 | 5.11076 | 4.42093 | 3.47083 | 2.34943 | 3.96174 | 4.14217 | 0.64865 | 0.4198252 | 2.34943 | py | 0.4796735 | 3.96174  | pb |
| PF11_0445 | PKH_094080 | PVX_092770 | PY01971 | PBANKA_090<br>570 | PCHAS_07069<br>0 | 1.84856 | 1.22651 | 1.78076 | 0.27332 | 1.48648 | 6.24946 | 0.60828 | 0.4258956 | 6.24946 | pc | 0.2290809 | 0.273323 | py |
| PF11_0447 | PKH_094090 | PVX_092775 | PY01973 | PBANKA_090<br>560 | PCHAS_07068<br>0 | 2.74411 | 1.41981 | 2.43109 | 1.86938 | 2.06314 | 2.4382  | 0.37684 | 0.2499595 | 1.41981 | pk | 0.3124493 | 2.431086 | pv |
| PF11_0452 | PKH_094130 | PVX_092795 | PY02609 | PBANKA_090<br>520 | PCHAS_07064<br>0 | 0.95898 | 1.09043 | 1.13588 | 5.84364 | 0.11037 | 4.88938 | 0.81804 | 0.5110967 | 4.88938 | pc | 0.2892402 | 5.843643 | py |
| PF11_0455 | PKH_094170 | PVX_092815 | PY06955 | PBANKA_090<br>480 | PCHAS_07060<br>0 | 3.19011 | 2.84309 | 6.26583 | 6.15445 | 5.73524 | 2.72275 | 1.53196 | 1.2485051 | 3.19011 | pf | 0.8455214 | 2.843089 | pk |
| PF11_0457 | PKH_094200 | PVX_092830 | PY00295 | PBANKA_090<br>450 | PCHAS_07057<br>0 | 3.05885 | 3.54233 | 2.9884  | 2.34272 | 3.6192  | 4.23705 | 0.50143 | 0.3617997 | 2.34272 | py | 0.4330327 | 3.619196 | pb |
| PF11_0461 | PKH_094250 | PVX_092850 | PY00721 | PBANKA_090<br>410 | PCHAS_07053<br>0 | 4.85259 | 5.027   | 4.35501 | 5.06507 | 4.86418 | 5.24215 | 0.21041 | 0.1180908 | 4.35501 | pv | 0.1380955 | 5.065069 | py |
| PF11_0462 | PKH_094260 | PVX_092855 | PY00720 | PBANKA_090<br>400 | PCHAS_07052<br>0 | 0.03523 | 2.62495 | 4.64678 | 1.20716 | 5.77904 | 6.12679 | 1.02738 | 0.676589  | 2.62495 | pk | 0.4757332 | 4.646779 | pv |
| PF11_0464 | PKH_094280 | PVX_092865 | PY00717 | PBANKA_090<br>380 | PCHAS_07050<br>0 | 5.56029 | 5.89777 | 6.03789 | 4.15779 | 5.9953  | 5.94131 | 0.39311 | 0.115027  | 4.15779 | py | 0.130287  | 5.995297 | pb |
| PF11_0468 | PKH_094330 | PVX_092890 | PY02594 | PBANKA_090<br>330 | PCHAS_07045<br>0 | 4.65975 | 4.9807  | 4.94874 | 1.60496 | 2.77894 | 6.20031 | 1.11362 | 0.7484626 | 1.60496 | py | 0.3931297 | 2.778942 | pb |
| PF11_0469 | PKH_094340 | PVX_092895 | PY02595 | PBANKA_090<br>320 | PCHAS_07044<br>0 | 2.00571 | 2.98649 | 2.54875 | 5.79405 | 1.94609 | 1.87233 | 0.70194 | 0.3433627 | 5.79405 | py | 0.4142973 | 1.946088 | pb |

|           |            |            |         |                   |                  |         |         |         |         |         |         |         |           |         |    |           |          |    |
|-----------|------------|------------|---------|-------------------|------------------|---------|---------|---------|---------|---------|---------|---------|-----------|---------|----|-----------|----------|----|
| PF11_0471 | PKH_094350 | PVX_092900 | PY02598 | PBANKA_090<br>310 | PCHAS_07043<br>0 | 6.066   | 1.84903 | 1.64168 | 0.11238 | 0.61431 | 1.60205 | 0.76388 | 0.5528038 | 6.066   | pf | 0.6292589 | 1.849033 | pk |
| PF11_0477 | PKH_094400 | PVX_092925 | PY05259 | PBANKA_090<br>260 | PCHAS_07038<br>0 | 5.54604 | 5.47013 | 4.94052 | 2.69599 | 5.43986 | 4.20799 | 0.76859 | 0.3735305 | 2.69599 | py | 0.4669131 | 5.43986  | pb |
| PF11_0483 | PKH_094470 | PVX_092960 | PY02409 | PBANKA_090<br>160 | PCHAS_07028<br>0 | 2.15775 | 2.49937 | 2.57432 | 1.8677  | 3.93597 | 1.90004 | 0.51403 | 0.2611906 | 3.93597 | pb | 0.2620594 | 1.900039 | pc |
| PF11_0485 | PKH_094490 | PVX_092970 | PY05978 | PBANKA_090<br>140 | PCHAS_07026<br>0 | 4.07482 | 3.0347  | 2.89255 | 3.99838 | 3.79771 | 4.16059 | 0.41814 | 0.2805999 | 2.89255 | pv | 0.3507498 | 3.998375 | py |
| PF11_0487 | PKH_094510 | PVX_092980 | PY05976 | PBANKA_090<br>120 | PCHAS_07024<br>0 | 0.7017  | 5.56939 | 5.31919 | 5.58944 | 3.92222 | 5.37468 | 0.58794 | 0.3760919 | 3.92222 | pb | 0.4214361 | 5.374678 | pc |
| PF11_0488 | PKH_094520 | PVX_092985 | PY05975 | PBANKA_090<br>110 | PCHAS_07023<br>0 | 4.07461 | 4.35328 | 3.9576  | 0.23041 | 4.35493 | 4.72277 | 0.5343  | 0.2090991 | 0.23041 | py | 0.2609618 | 4.354929 | pb |
| PF11_0524 | PKH_090420 | PVX_091025 | PY07662 | PBANKA_093<br>990 | PCHAS_09044<br>0 | 3.29868 | 3.0875  | 2.49016 | 1.40929 | 3.26003 | 5.09082 | 0.7771  | 0.5318529 | 5.09082 | pc | 0.2452639 | 1.409289 | py |
| PF13_0013 | PKH_140110 | PVX_121970 | PY00741 | PBANKA_140<br>110 | PCHAS_14030<br>0 | 1.35216 | 0.62645 | 1.91474 | 2.23576 | 1.33262 | 0.8379  | 0.45095 | 0.3605088 | 2.23576 | py | 0.450636  | 1.332621 | pb |
| PF13_0014 | PKH_140130 | PVX_121980 | PY03900 | PBANKA_140<br>130 | PCHAS_14032<br>0 | 2.35019 | 2.5229  | 2.35667 | 2.50413 | 2.64561 | 2.12697 | 0.1398  | 0.0923302 | 2.12697 | pc | 0.080041  | 2.645612 | pb |
| PF13_0015 | PKH_140140 | PVX_121985 | PY03901 | PBANKA_140<br>140 | PCHAS_14033<br>0 | 2.71238 | 1.92737 | 2.46044 | 0.67425 | 2.47179 | 2.42998 | 0.4355  | 0.165364  | 0.67425 | py | 0.2038671 | 2.471792 | pb |
| PF13_0016 | PKH_140160 | PVX_121995 | PY03902 | PBANKA_140<br>160 | PCHAS_14035<br>0 | 3.26037 | 3.07805 | 3.4775  | 4.66316 | 3.89984 | 4.15457 | 0.48361 | 0.343198  | 4.66316 | py | 0.3234133 | 3.89984  | pb |
| PF13_0018 | PKH_140190 | PVX_122010 | PY02930 | PBANKA_140<br>190 | PCHAS_14038<br>0 | 1.2793  | 1.33019 | 2.13816 | 3.69526 | 0.46835 | 1.98733 | 0.79049 | 0.4755692 | 3.69526 | py | 0.3790011 | 0.468346 | pb |
| PF13_0019 | PKH_140200 | PVX_122015 | PY02931 | PBANKA_140<br>200 | PCHAS_14039<br>0 | 5.93815 | 5.41745 | 5.02514 | 2.21464 | 0.79896 | 5.52411 | 0.92524 | 0.5155396 | 2.21464 | py | 0.2549158 | 0.798957 | pb |
| PF13_0020 | PKH_140290 | PVX_122060 | PY07310 | PBANKA_140<br>290 | PCHAS_14048<br>0 | 3.1838  | 0.83081 | 4.92975 | 0.31658 | 1.85762 | 2.63222 | 1.29013 | 0.9337245 | 4.92975 | pv | 0.7818952 | 0.316577 | py |
| PF13_0022 | PKH_140320 | PVX_122075 | PY00225 | PBANKA_140<br>320 | PCHAS_14051<br>0 | 3.76683 | 2.79334 | 2.7744  | 5.17879 | 3.61129 | 4.38254 | 0.69152 | 0.5163251 | 5.17879 | py | 0.6454064 | 3.611292 | pb |
| PF13_0023 | PKH_140340 | PVX_122080 | PY02185 | PBANKA_140<br>340 | PCHAS_14053<br>0 | 2.07746 | 1.4767  | 2.27292 | 6.27149 | 2.90022 | 2.20343 | 0.63902 | 0.3237961 | 6.27149 | py | 0.2305493 | 2.900216 | pb |
| PF13_0024 | PKH_140350 | PVX_122085 | PY02186 | PBANKA_140<br>350 | PCHAS_14054<br>0 | 4.08252 | 0.75903 | 5.22649 | 1.67475 | 4.65445 | 4.80886 | 1.11097 | 0.7063459 | 1.67475 | py | 0.8443318 | 4.654454 | pb |
| PF13_0026 | PKH_140370 | PVX_122095 | PY02188 | PBANKA_140<br>370 | PCHAS_14056<br>0 | 3.7396  | 3.54633 | 3.03121 | 4.25259 | 3.02931 | 3.68821 | 0.34559 | 0.2734574 | 4.25259 | py | 0.2125669 | 3.029311 | pb |
| PF13_0027 | PKH_140400 | PVX_122110 | PY00561 | PBANKA_140<br>400 | PCHAS_14059<br>0 | 2.58787 | 3.2136  | 3.06987 | 5.45391 | 3.06439 | 2.13012 | 0.65917 | 0.3130944 | 5.45391 | py | 0.391368  | 3.06439  | pb |
| PF13_0028 | PKH_140410 | PVX_122115 | PY00562 | PBANKA_140<br>410 | PCHAS_14060<br>0 | 4.72893 | 2.63346 | 4.07198 | 4.60415 | 3.65352 | 4.4064  | 0.56342 | 0.3215159 | 2.63346 | pk | 0.3182911 | 4.071983 | pv |
| PF13_0031 | PKH_140440 | PVX_122130 | PY05590 | PBANKA_140<br>440 | PCHAS_14063<br>0 | 3.16262 | 4.54596 | 2.82885 | 1.9809  | 1.50013 | 1.67317 | 0.89721 | 0.5636344 | 4.54596 | pk | 0.4925552 | 2.828849 | pv |
| PF13_0032 | PKH_140470 | PVX_122145 | PY02587 | PBANKA_140<br>470 | PCHAS_14066<br>0 | 4.29673 | 4.01473 | 4.28913 | 3.2768  | 5.23114 | 4.69834 | 0.44092 | 0.325122  | 3.2768  | py | 0.172801  | 5.231141 | pb |

|           |            |            |         |               |              |         |         |         |         |         |         |         |           |         |    |           |          |    |
|-----------|------------|------------|---------|---------------|--------------|---------|---------|---------|---------|---------|---------|---------|-----------|---------|----|-----------|----------|----|
| PF13_0033 | PKH_140490 | PVX_122155 | PY02590 | PBANKA_140490 | PCHAS_140680 | 3.97804 | 5.5174  | 3.62064 | 3.14468 | 3.44875 | 3.18658 | 0.55601 | 0.2534847 | 5.5174  | pk | 0.2738839 | 3.620642 | pv |
| PF13_0034 | PKH_140510 | PVX_122165 | PY02592 | PBANKA_140510 | PCHAS_140700 | 2.74127 | 6.27903 | 4.70609 | 1.3413  | 2.92357 | 2.85702 | 1.06805 | 0.7094201 | 6.27903 | pk | 0.4245063 | 4.706091 | pv |
| PF13_0040 | PKH_140650 | PVX_122210 | PY00033 | PBANKA_140610 | PCHAS_140800 | 5.057   | 4.39819 | 3.3291  | 2.63478 | 1.30737 | 4.63459 | 1.13642 | 0.7455418 | 1.30737 | pb | 0.8728259 | 4.634594 | pc |
| PF13_0041 | PKH_140660 | PVX_122215 | PY00032 | PBANKA_140620 | PCHAS_140810 | 0.03207 | 0.29876 | 4.63992 | 1.88231 | 0.02126 | 1.17924 | 0.82504 | 0.6016445 | 4.63992 | pv | 0.3561676 | 1.882315 | py |
| PF13_0042 | PKH_140670 | PVX_122220 | PY00031 | PBANKA_140630 | PCHAS_140820 | 2.26954 | 1.03852 | 2.56016 | 1.76113 | 0.43881 | 1.8863  | 0.57959 | 0.4060095 | 0.43881 | pb | 0.5075119 | 1.886301 | pc |
| PF13_0043 | PKH_140700 | PVX_122235 | PY06256 | PBANKA_140660 | PCHAS_140850 | 2.38812 | 4.27053 | 4.81668 | 4.82676 | 4.51071 | 4.6683  | 0.52373 | 0.1724397 | 2.38812 | pf | 0.1161056 | 4.270527 | pk |
| PF13_0045 | PKH_140720 | PVX_122245 | PY03153 | PBANKA_140680 | PCHAS_140870 | 2.41585 | 2.14438 | 2.28965 | 4.32959 | 2.54716 | 1.31952 | 0.58984 | 0.2998222 | 4.32959 | py | 0.3103996 | 2.547162 | pb |
| PF13_0047 | PKH_140760 | PVX_122265 | PY04274 | PBANKA_140720 | PCHAS_140910 | 4.19068 | 4.63168 | 4.82018 | 1.9988  | 2.8965  | 4.68029 | 0.84103 | 0.4826585 | 1.9988  | py | 0.1695272 | 2.896499 | pb |
| PF13_0048 | PKH_140780 | PVX_122275 | PY07320 | PBANKA_140740 | PCHAS_140930 | 2.16512 | 2.34532 | 2.97676 | 2.20306 | 0.91738 | 1.41046 | 0.50536 | 0.3492999 | 0.91738 | pb | 0.2384755 | 1.410462 | pc |
| PF13_0049 | PKH_140800 | PVX_122285 | PY06973 | PBANKA_140760 | PCHAS_140950 | 2.34471 | 2.03653 | 2.16969 | 2.54975 | 2.85177 | 2.48284 | 0.22224 | 0.1652724 | 2.85177 | pb | 0.1720592 | 2.482836 | pc |
| PF13_0050 | PKH_140830 | PVX_122300 | PY02325 | PBANKA_140790 | PCHAS_140980 | 4.22861 | 5.40056 | 0.42486 | 1.82077 | 1.13402 | 1.50745 | 1.14676 | 0.7571966 | 4.22861 | pf | 0.4423363 | 5.400563 | pk |
| PF13_0051 | PKH_140840 | PVX_122305 | PY02326 | PBANKA_140800 | PCHAS_140990 | 1.94226 | 1.67442 | 4.96156 | 2.47142 | 2.12421 | 1.38682 | 0.75895 | 0.3068782 | 4.96156 | pv | 0.2513088 | 2.471418 | py |
| PF13_0052 | PKH_140850 | PVX_122310 | PY03106 | PBANKA_140810 | PCHAS_141000 | 1.93218 | 3.00591 | 2.10041 | 3.06647 | 2.73272 | 2.13547 | 0.43951 | 0.3412088 | 3.06647 | py | 0.2771974 | 2.732724 | pb |
| PF13_0053 | PKH_140860 | PVX_122315 | PY03107 | PBANKA_140820 | PCHAS_141010 | 1.97982 | 2.85984 | 1.20364 | 5.16712 | 2.87429 | 1.93136 | 0.94917 | 0.5198245 | 5.16712 | py | 0.4261631 | 2.874291 | pb |
| PF13_0054 | PKH_140870 | PVX_122320 | PY03108 | PBANKA_140830 | PCHAS_141020 | 3.33254 | 3.04418 | 2.14832 | 1.13328 | 3.02354 | 2.23289 | 0.64763 | 0.3991028 | 1.13328 | py | 0.4988785 | 3.023538 | pb |
| PF13_0055 | PKH_140920 | PVX_122345 | PY05348 | PBANKA_140880 | PCHAS_141070 | 0.66912 | 0.86275 | 0.999   | 1.03223 | 2.63967 | 1.5293  | 0.44506 | 0.2059316 | 2.63967 | pb | 0.1248385 | 1.5293   | pc |
| PF13_0056 | PKH_140930 | PVX_122350 | PY06125 | PBANKA_140890 | PCHAS_141080 | 1.06149 | 1.898   | 2.48384 | 2.64669 | 3.12462 | 3.18771 | 0.58595 | 0.3860958 | 1.06149 | pf | 0.2954475 | 1.898004 | pk |
| PF13_0058 | PKH_140960 | PVX_122365 | PY02798 | PBANKA_140920 | PCHAS_141110 | 6.04598 | 0.1022  | 5.73269 | 6.14934 | 5.73933 | 5.77213 | 0.22276 | 0.1446595 | 0.1022  | pk | 0.1709649 | 5.732688 | pv |
| PF13_0060 | PKH_141000 | PVX_122385 | PY02801 | PBANKA_140960 | PCHAS_141150 | 1.01684 | 3.47501 | 0.13499 | 0.73998 | 5.94207 | 2.50825 | 1.07771 | 0.7462436 | 3.47501 | pk | 0.7815564 | 0.134991 | pv |
| PF13_0061 | PKH_141020 | PVX_122395 | PY02803 | PBANKA_140980 | PCHAS_141170 | 3.48154 | 2.70126 | 3.84695 | 5.02772 | 3.98315 | 4.45602 | 0.57286 | 0.4310515 | 2.70126 | pk | 0.5047649 | 3.846948 | pv |
| PF13_0062 | PKH_141030 | PVX_122405 | PY02804 | PBANKA_140990 | PCHAS_141180 | 2.83518 | 3.70945 | 2.78481 | 3.81133 | 3.55657 | 4.03255 | 0.39613 | 0.2904262 | 2.78481 | pv | 0.3375614 | 3.811332 | py |
| PF13_0063 | PKH_141040 | PVX_122410 | PY02805 | PBANKA_141000 | PCHAS_141190 | 4.27813 | 5.55428 | 3.78864 | 3.18314 | 3.31379 | 4.12988 | 0.61278 | 0.3822144 | 5.55428 | pk | 0.4777681 | 3.788641 | pv |

|           |            |            |         |               |              |         |         |         |         |         |         |         |           |         |    |           |          |    |
|-----------|------------|------------|---------|---------------|--------------|---------|---------|---------|---------|---------|---------|---------|-----------|---------|----|-----------|----------|----|
| PF13_0065 | PKH_141110 | PVX_122430 | PY01556 | PBANKA_141040 | PCHAS_141230 | 3.35269 | 0.56769 | 3.96367 | 2.53113 | 2.32348 | 2.27333 | 0.7805  | 0.5439086 | 0.56769 | pk | 0.3217521 | 3.963666 | pv |
| PF13_0068 | PKH_141150 | PVX_122450 | PY02336 | PBANKA_141080 | PCHAS_141270 | 3.92428 | 3.23993 | 3.30033 | 2.64972 | 3.43491 | 2.81931 | 0.32509 | 0.2532436 | 3.92428 | pf | 0.3165545 | 3.239926 | pk |
| PF13_0070 | PKH_141180 | PVX_122460 | PY05086 | PBANKA_141110 | PCHAS_141300 | 5.40823 | 3.01591 | 4.9665  | 3.45368 | 4.38501 | 4.29777 | 0.6654  | 0.5246564 | 3.01591 | pk | 0.510448  | 4.966498 | pv |
| PF13_0072 | PKH_141190 | PVX_122465 | PY05085 | PBANKA_141120 | PCHAS_141310 | 5.40479 | 5.75039 | 0.42143 | 2.57205 | 4.97017 | 1.74445 | 1.24369 | 0.8714562 | 2.57205 | py | 0.8942653 | 4.970173 | pb |
| PF13_0078 | PKH_141260 | PVX_122495 | PY03766 | PBANKA_141190 | PCHAS_141380 | 5.68146 | 4.89483 | 4.8824  | 5.0939  | 5.09838 | 5.69594 | 0.26744 | 0.2005227 | 5.69594 | pc | 0.1037616 | 5.681465 | pf |
| PF13_0081 | PKH_141350 | PVX_122540 | PY00477 | PBANKA_141290 | PCHAS_141470 | 1.44898 | 1.20068 | 4.40346 | 4.38232 | 4.20686 | 5.04235 | 1.14859 | 0.7579936 | 1.20068 | pk | 0.9422061 | 4.403463 | pv |
| PF13_0083 | PKH_141370 | PVX_122550 | PY00475 | PBANKA_141310 | PCHAS_141490 | 2.37942 | 2.78871 | 2.62276 | 0.34729 | 2.37996 | 2.36831 | 0.4494  | 0.1327472 | 0.34729 | py | 0.165934  | 2.379958 | pb |
| PF13_0084 | PKH_141400 | PVX_122560 | PY00473 | PBANKA_141330 | PCHAS_141510 | 1.61032 | 3.45819 | 2.5952  | 5.50687 | 0.76933 | 5.14612 | 1.46796 | 1.2449315 | 5.50687 | py | 1.0996961 | 0.769331 | pb |
| PF13_0085 | PKH_141430 | PVX_122575 | PY04620 | PBANKA_141360 | PCHAS_141540 | 0.98132 | 4.06071 | 0.23293 | 6.2139  | 6.21451 | 3.52996 | 1.03176 | 0.7012013 | 3.52996 | pc | 0.3380525 | 4.060714 | pk |
| PF13_0087 | PKH_141500 | PVX_122610 | PY06950 | PBANKA_141420 | PCHAS_141600 | 2.02909 | 3.25859 | 3.04956 | 5.49083 | 3.80834 | 1.29955 | 1.02993 | 0.7476565 | 5.49083 | py | 0.7448754 | 3.808341 | pb |
| PF13_0088 | PKH_141510 | PVX_122615 | PY06951 | PBANKA_141430 | PCHAS_141610 | 1.98224 | 4.48073 | 3.55854 | 2.10874 | 3.63558 | 2.45657 | 0.85455 | 0.6206273 | 4.48073 | pk | 0.5002926 | 3.558537 | pv |
| PF13_0089 | PKH_141540 | PVX_122630 | PY06556 | PBANKA_141460 | PCHAS_141640 | 3.91449 | 5.30795 | 3.2337  | 5.80234 | 2.90903 | 3.38142 | 0.91677 | 0.6159424 | 5.80234 | py | 0.6518305 | 2.909028 | pb |
| PF13_0091 | PKH_141570 | PVX_122645 | PY03239 | PBANKA_141500 | PCHAS_141680 | 2.4431  | 3.07782 | 2.43707 | 2.49121 | 1.24439 | 2.07267 | 0.37633 | 0.2118593 | 1.24439 | pb | 0.1722163 | 2.072666 | pc |
| PF13_0095 | PKH_141630 | PVX_122675 | PY03411 | PBANKA_141560 | PCHAS_141740 | 4.27048 | 5.18481 | 5.10383 | 4.08677 | 4.85348 | 4.41588 | 0.39483 | 0.320457  | 4.08677 | py | 0.4005713 | 4.853481 | pb |
| PF13_0096 | PKH_141620 | PVX_122670 | PY03410 | PBANKA_141550 | PCHAS_141730 | 2.38966 | 1.00115 | 2.66894 | 0.86901 | 3.72584 | 5.07553 | 1.20175 | 0.9049219 | 5.07553 | pc | 0.7971078 | 3.725836 | pb |
| PF13_0098 | PKH_141650 | PVX_122685 | PY00193 | PBANKA_141580 | PCHAS_141760 | 2.93292 | 3.17288 | 2.83815 | 1.32849 | 3.01373 | 3.23352 | 0.38676 | 0.1270648 | 1.32849 | py | 0.158831  | 3.013729 | pb |
| PF13_0099 | PKH_141660 | PVX_122690 | PY00192 | PBANKA_141590 | PCHAS_141770 | 2.9618  | 3.01824 | 3.01959 | 2.3199  | 2.98513 | 3.52248 | 0.21558 | 0.119028  | 2.3199  | py | 0.1405064 | 2.985129 | pb |
| PF13_0101 | PKH_141750 | PVX_122735 | PY01969 | PBANKA_141680 | PCHAS_141860 | 2.62711 | 4.6132  | 5.85309 | 3.97122 | 4.97602 | 5.20003 | 0.80293 | 0.4937405 | 2.62711 | pf | 0.5264719 | 4.613202 | pk |
| PF13_0104 | PKH_141820 | PVX_122765 | PY03274 | PBANKA_141750 | PCHAS_141930 | 4.69549 | 2.23006 | 0.6642  | 1.66367 | 2.80066 | 3.11916 | 1.00956 | 0.7183881 | 4.69549 | pf | 0.8979851 | 2.230065 | pk |
| PF13_0106 | PKH_141830 | PVX_122770 | PY03275 | PBANKA_141760 | PCHAS_141940 | 0.33205 | 0.77117 | 6.2151  | 6.21474 | 5.35851 | 0.39956 | 0.42733 | 0.261454  | 5.35851 | pb | 0.3099402 | 0.399564 | pc |
| PF13_0107 | PKH_141840 | PVX_122775 | PY04504 | PBANKA_141770 | PCHAS_141950 | 1.23783 | 5.3335  | 4.85423 | 6.17927 | 4.9522  | 0.98928 | 0.97214 | 0.7290605 | 1.23783 | pf | 0.9113256 | 5.3335   | pk |
| PF13_0109 | PKH_141850 | PVX_122780 | PY04503 | PBANKA_141780 | PCHAS_141960 | 1.83694 | 1.06582 | 1.97009 | 1.3996  | 1.55112 | 1.86484 | 0.27589 | 0.1768414 | 1.06582 | pk | 0.1877653 | 1.970087 | pv |

|           |            |            |         |                   |                  |         |         |         |         |         |         |         |           |         |    |           |          |    |
|-----------|------------|------------|---------|-------------------|------------------|---------|---------|---------|---------|---------|---------|---------|-----------|---------|----|-----------|----------|----|
| PF13_0116 | PKH_141900 | PVX_122810 | PY03873 | PBANKA_141<br>830 | PCHAS_14201<br>0 | 0.75531 | 4.9214  | 3.46752 | 4.06284 | 1.11102 | 1.96873 | 1.43612 | 1.1328049 | 4.9214  | pk | 1.0413092 | 3.467518 | pv |
| PF13_0117 | PKH_141920 | PVX_122820 | PY03871 | PBANKA_141<br>850 | PCHAS_14203<br>0 | 3.65514 | 3.0788  | 6.01432 | 4.91185 | 3.29328 | 2.39856 | 0.96845 | 0.6179258 | 6.01432 | pv | 0.367764  | 4.911851 | py |
| PF13_0118 | PKH_141940 | PVX_122830 | PY07139 | PBANKA_141<br>870 | PCHAS_14205<br>0 | 3.27039 | 0.63905 | 2.31332 | 4.07801 | 4.0127  | 2.04574 | 1.0605  | 0.7463289 | 0.63905 | pk | 0.6936431 | 2.313321 | pv |
| PF13_0119 | PKH_141960 | PVX_122840 | PY07141 | PBANKA_141<br>890 | PCHAS_14207<br>0 | 0.32633 | 0.13041 | 0.00669 | 2.89955 | 2.94278 | 4.60858 | 1.28436 | 0.9787613 | 2.94278 | pb | 0.772197  | 4.608576 | pc |
| PF13_0121 | PKH_141980 | PVX_122850 | PY03521 | PBANKA_141<br>910 | PCHAS_14209<br>0 | 3.72334 | 3.87223 | 4.75497 | 5.56051 | 3.20947 | 1.29593 | 0.99316 | 0.6765349 | 1.29593 | pc | 0.4235998 | 5.560508 | py |
| PF13_0122 | PKH_141990 | PVX_122855 | PY03520 | PBANKA_141<br>920 | PCHAS_14210<br>0 | 1.80423 | 4.28296 | 2.55769 | 5.31218 | 2.87284 | 2.93335 | 0.88229 | 0.5708787 | 5.31218 | py | 0.7135984 | 2.872841 | pb |
| PF13_0123 | PKH_142000 | PVX_122860 | PY01632 | PBANKA_141<br>930 | PCHAS_14211<br>0 | 1.21058 | 1.13203 | 0.4557  | 5.6839  | 6.18529 | 2.07048 | 0.77576 | 0.6079582 | 2.07048 | pc | 0.4962021 | 5.6839   | py |
| PF13_0124 | PKH_123130 | PVX_116780 | PY06857 | PBANKA_133<br>720 | PCHAS_13418<br>0 | 1.67944 | 5.66292 | 6.26038 | 2.86903 | 5.87148 | 6.02601 | 0.96913 | 0.537719  | 2.86903 | py | 0.6335175 | 5.871484 | pb |
| PF13_0126 | PKH_123080 | PVX_116755 | PY01060 | PBANKA_133<br>760 | PCHAS_13422<br>0 | 3.6884  | 4.78824 | 5.89881 | 3.15035 | 5.54718 | 5.52618 | 0.89086 | 0.5938694 | 3.15035 | py | 0.7370866 | 5.54718  | pb |
| PF13_0130 | PKH_122990 | PVX_116710 | PY01589 | PBANKA_133<br>840 | PCHAS_13430<br>0 | 2.45345 | 3.31961 | 2.04724 | 2.63899 | 2.8006  | 2.47619 | 0.29705 | 0.1877816 | 3.31961 | pk | 0.1274898 | 2.047238 | pv |
| PF13_0132 | PKH_122970 | PVX_116700 | PY04600 | PBANKA_133<br>860 | PCHAS_13432<br>0 | 2.31199 | 2.36185 | 2.44271 | 2.57035 | 2.70039 | 2.4432  | 0.09957 | 0.067944  | 2.70039 | pb | 0.0848091 | 2.443196 | pc |
| PF13_0133 | PKH_122960 | PVX_116695 | PY02085 | PBANKA_133<br>870 | PCHAS_13433<br>0 | 2.89797 | 5.99258 | 4.87668 | 4.41362 | 5.89748 | 4.92004 | 0.7703  | 0.5199513 | 2.89797 | pf | 0.381803  | 5.992582 | pk |
| PF13_0134 | PKH_122950 | PVX_116690 | PY07345 | PBANKA_133<br>880 | PCHAS_13434<br>0 | 3.56086 | 2.60633 | 2.47203 | 2.66119 | 2.90921 | 3.37762 | 0.35136 | 0.2416932 | 3.56086 | pf | 0.2884016 | 2.606327 | pk |
| PF13_0135 | PKH_122930 | PVX_116680 | PY06640 | PBANKA_133<br>900 | PCHAS_13436<br>0 | 1.85496 | 3.3812  | 3.08473 | 2.83201 | 0.77206 | 0.00089 | 1.11167 | 0.7677807 | 0.00089 | pc | 0.4447386 | 0.772063 | pb |
| PF13_0140 | PKH_122830 | PVX_116635 | PY03886 | PBANKA_134<br>000 | PCHAS_13446<br>0 | 3.7098  | 3.75552 | 2.25918 | 0.20972 | 2.92146 | 2.28117 | 0.93945 | 0.5849944 | 0.20972 | py | 0.731243  | 2.921456 | pb |
| PF13_0141 | PKH_122820 | PVX_116630 | PY03885 | PBANKA_134<br>010 | PCHAS_13447<br>0 | 3.04233 | 2.31004 | 3.00266 | 5.16008 | 3.48298 | 4.21465 | 0.75045 | 0.4769856 | 5.16008 | py | 0.4860695 | 3.482975 | pb |
| PF13_0142 | PKH_122810 | PVX_116625 | PY00919 | PBANKA_134<br>020 | PCHAS_13448<br>0 | 2.39166 | 1.232   | 2.53259 | 4.11619 | 2.92392 | 2.61116 | 0.5825  | 0.3822839 | 4.11619 | py | 0.3800237 | 2.92392  | pb |
| PF13_0143 | PKH_122800 | PVX_116620 | PY00920 | PBANKA_134<br>030 | PCHAS_13449<br>0 | 2.59039 | 2.17367 | 2.39596 | 0.12763 | 1.52973 | 1.38341 | 0.68654 | 0.4146427 | 0.12763 | py | 0.3573167 | 1.529726 | pb |
| PF13_0146 | PKH_122730 | PVX_116590 | PY02027 | PBANKA_134<br>090 | PCHAS_13455<br>0 | 2.26949 | 5.54775 | 2.70205 | 1.21372 | 5.99397 | 3.48405 | 1.37775 | 1.0523192 | 5.54775 | pk | 1.2072605 | 2.702048 | pv |
| PF13_0147 | PKH_122660 | PVX_116560 | PY01733 | PBANKA_134<br>150 | PCHAS_13461<br>0 | 2.64535 | 2.09369 | 2.18271 | 3.05388 | 2.20381 | 2.32767 | 0.25778 | 0.1393237 | 3.05388 | py | 0.1741546 | 2.203811 | pb |
| PF13_0148 | PKH_122630 | PVX_116550 | PY03327 | PBANKA_134<br>180 | PCHAS_13464<br>0 | 4.04426 | 4.67943 | 4.62266 | 4.09751 | 3.07364 | 3.03073 | 0.54183 | 0.4368362 | 3.03073 | pc | 0.2900791 | 3.073644 | pb |
| PF13_0149 | PKH_122340 | PVX_082410 | PY01043 | PBANKA_134<br>430 | PCHAS_13489<br>0 | 3.97053 | 4.58246 | 5.2292  | 4.39223 | 5.07869 | 4.70676 | 0.34491 | 0.2666406 | 3.97053 | pf | 0.3022261 | 4.582463 | pk |



|           |            |            |         |                   |                  |         |         |         |         |         |         |         |           |         |    |           |          |    |
|-----------|------------|------------|---------|-------------------|------------------|---------|---------|---------|---------|---------|---------|---------|-----------|---------|----|-----------|----------|----|
| PF13_0150 | PKH_122370 | PVX_082395 | PY01037 | PBANKA_134<br>400 | PCHAS_13486<br>0 | 1.90677 | 2.49207 | 2.64415 | 2.52806 | 2.04248 | 1.79205 | 0.3205  | 0.2445918 | 1.79205 | pc | 0.2677204 | 2.644151 | pv |
| PF13_0152 | PKH_122390 | PVX_082385 | PY01554 | PBANKA_134<br>380 | PCHAS_13484<br>0 | 6.23931 | 4.05193 | 5.86479 | 0.69774 | 2.80375 | 2.03062 | 1.37094 | 1.0593278 | 4.05193 | pk | 1.0451264 | 5.864793 | pv |
| PF13_0154 | PKH_122430 | PVX_082365 | PY07292 | PBANKA_134<br>350 | PCHAS_13481<br>0 | 5.02637 | 5.44167 | 5.41914 | 4.83231 | 5.57315 | 5.5392  | 0.2127  | 0.1333667 | 4.83231 | py | 0.1338384 | 5.573146 | pb |
| PF13_0156 | PKH_122490 | PVX_082355 | PY04957 | PBANKA_134<br>330 | PCHAS_13479<br>0 | 3.64372 | 3.70505 | 3.43859 | 3.87789 | 3.44024 | 3.59135 | 0.12608 | 0.0939889 | 3.87789 | py | 0.0797071 | 3.440236 | pb |
| PF13_0159 | PKH_122530 | PVX_116500 | PY06728 | PBANKA_134<br>280 | PCHAS_13474<br>0 | 0.11334 | 3.06046 | 3.57823 | 2.46142 | 0.12546 | 0.21364 | 1.36695 | 1.0566149 | 3.57823 | pv | 0.7588239 | 2.461419 | py |
| PF13_0161 | PKH_122560 | PVX_116515 | PY00261 | PBANKA_134<br>250 | PCHAS_13471<br>0 | 6.20101 | 0.21564 | 0.16958 | 0.00618 | 0.13038 | 0.58502 | 0.15264 | 0.0922443 | 0.58502 | pc | 0.0621667 | 6.201006 | pf |
| PF13_0162 | PKH_122320 | PVX_082420 | PY01353 | PBANKA_134<br>450 | PCHAS_13491<br>0 | 0.96966 | 0.61756 | 1.26782 | 5.90831 | 0.48546 | 2.4036  | 0.65216 | 0.4253802 | 2.4036  | pc | 0.2836149 | 5.908307 | py |
| PF13_0164 | PKH_122220 | PVX_082465 | PY06135 | PBANKA_134<br>550 | PCHAS_13501<br>0 | 5.21854 | 5.0886  | 3.16913 | 1.38417 | 4.12638 | 2.14991 | 1.28839 | 0.9976214 | 1.38417 | py | 1.2470268 | 4.126379 | pb |
| PF13_0165 | PKH_122190 | PVX_082480 | PY02209 | PBANKA_134<br>580 | PCHAS_13504<br>0 | 1.9907  | 1.83398 | 2.33033 | 2.63435 | 0.93766 | 1.19712 | 0.49777 | 0.3867153 | 0.93766 | pb | 0.2849998 | 1.197121 | pc |
| PF13_0166 | PKH_122180 | PVX_082485 | PY02207 | PBANKA_134<br>590 | PCHAS_13505<br>0 | 6.03988 | 6.27081 | 5.68402 | 5.59533 | 5.48728 | 5.69116 | 0.20587 | 0.129688  | 6.27081 | pk | 0.16211   | 5.684024 | pv |
| PF13_0169 | PKH_122130 | PVX_082510 | PY02177 | PBANKA_134<br>640 | PCHAS_13510<br>0 | 6.03736 | 4.03796 | 4.52523 | 0.04852 | 5.60382 | 5.71525 | 0.65288 | 0.4480037 | 4.03796 | pk | 0.2625004 | 4.525229 | pv |
| PF13_0170 | PKH_122110 | PVX_082520 | PY02178 | PBANKA_134<br>660 | PCHAS_13512<br>0 | 2.18999 | 1.95349 | 2.38643 | 1.5517  | 2.80778 | 2.31955 | 0.30309 | 0.2101434 | 1.5517  | py | 0.1406218 | 2.807776 | pb |
| PF13_0171 | PKH_122100 | PVX_082525 | PY07409 | PBANKA_134<br>670 | PCHAS_13513<br>0 | 2.36128 | 2.2569  | 2.47003 | 1.63488 | 3.03931 | 1.67264 | 0.38437 | 0.3047576 | 3.03931 | pb | 0.2348819 | 1.672639 | pc |
| PF13_0173 | PKH_122070 | PVX_082540 | PY02567 | PBANKA_134<br>700 | PCHAS_13516<br>0 | 5.92368 | 4.48857 | 5.84595 | 5.55637 | 5.91121 | 5.79269 | 0.3072  | 0.0971654 | 4.48857 | pk | 0.1214567 | 5.845946 | pv |
| PF13_0175 | PKH_122040 | PVX_082555 | PY05726 | PBANKA_134<br>730 | PCHAS_13519<br>0 | 1.31302 | 3.54523 | 2.63418 | 1.90277 | 2.52724 | 0.8947  | 0.76603 | 0.5907413 | 3.54523 | pk | 0.5555736 | 2.634185 | pv |
| PF13_0176 | PKH_122030 | PVX_082560 | PY05725 | PBANKA_134<br>740 | PCHAS_13520<br>0 | 4.94487 | 3.26045 | 3.0418  | 4.11431 | 4.17967 | 3.43465 | 0.58366 | 0.3983475 | 4.94487 | pf | 0.4543856 | 3.260452 | pk |
| PF13_0177 | PKH_122020 | PVX_082565 | PY05724 | PBANKA_134<br>750 | PCHAS_13521<br>0 | 1.22654 | 0.72172 | 1.82766 | 0.1916  | 6.09755 | 1.63995 | 0.66108 | 0.5108591 | 6.09755 | pb | 0.5352196 | 1.639952 | pc |
| PF13_0179 | PKH_122000 | PVX_082575 | PY01849 | PBANKA_134<br>770 | PCHAS_13523<br>0 | 2.63268 | 2.27127 | 2.80508 | 1.59913 | 1.87265 | 2.6087  | 0.3839  | 0.2587687 | 1.59913 | py | 0.1394485 | 1.872652 | pb |
| PF13_0180 | PKH_121990 | PVX_082580 | PY01850 | PBANKA_134<br>780 | PCHAS_13524<br>0 | 2.84197 | 2.77457 | 2.65979 | 2.93084 | 2.51018 | 2.69016 | 0.11454 | 0.084571  | 2.51018 | pb | 0.0846114 | 2.69016  | pc |
| PF13_0182 | PKH_121970 | PVX_082590 | PY01851 | PBANKA_134<br>790 | PCHAS_13525<br>0 | 3.68535 | 4.63542 | 3.79099 | 5.12987 | 4.11185 | 4.66717 | 0.47404 | 0.3652487 | 5.12987 | py | 0.4565608 | 4.11185  | pb |
| PF13_0183 | PKH_121940 | PVX_082605 | PY02103 | PBANKA_134<br>820 | PCHAS_13528<br>0 | 3.08634 | 2.63322 | 3.44496 | 4.80145 | 3.26096 | 2.23368 | 0.59236 | 0.3678048 | 4.80145 | py | 0.4161009 | 3.260961 | pb |
| PF13_0184 | PKH_121930 | PVX_082610 | PY01761 | PBANKA_134<br>830 | PCHAS_13529<br>0 | 1.59856 | 1.92003 | 2.44219 | 2.80472 | 1.25906 | 1.95443 | 0.40395 | 0.3078013 | 2.80472 | py | 0.2195106 | 1.259065 | pb |

|           |            |            |         |                   |                  |         |         |         |         |         |         |         |           |         |    |           |          |    |
|-----------|------------|------------|---------|-------------------|------------------|---------|---------|---------|---------|---------|---------|---------|-----------|---------|----|-----------|----------|----|
| PF13_0185 | PKH_121920 | PVX_082615 | PY01762 | PBANKA_134<br>840 | PCHAS_13530<br>0 | 5.48054 | 5.83941 | 5.19945 | 4.56476 | 4.61572 | 4.99095 | 0.39133 | 0.299903  | 5.83941 | pk | 0.3227531 | 5.19945  | pv |
| PF13_0186 | PKH_121910 | PVX_082620 | PY04802 | PBANKA_134<br>850 | PCHAS_13531<br>0 | 0.99571 | 3.24761 | 1.60875 | 2.38227 | 2.86953 | 2.4971  | 0.60459 | 0.4252242 | 0.99571 | pf | 0.3439028 | 3.247608 | pk |
| PF13_0188 | PKH_121890 | PVX_082630 | PY01408 | PBANKA_134<br>870 | PCHAS_13533<br>0 | 4.87137 | 3.85959 | 5.28652 | 4.57875 | 5.01362 | 4.44613 | 0.38117 | 0.2550501 | 3.85959 | pk | 0.2150266 | 5.286518 | pv |
| PF13_0189 | PKH_121880 | PVX_082635 | PY01407 | PBANKA_134<br>880 | PCHAS_13534<br>0 | 3.82033 | 3.70685 | 5.38317 | 4.1029  | 0.28192 | 4.88681 | 0.8675  | 0.5485597 | 0.28192 | pb | 0.4897205 | 4.886813 | pc |
| PF13_0196 | PKH_121860 | PVX_082645 | PY02147 | PBANKA_134<br>900 | PCHAS_13536<br>0 | 5.79443 | 5.33593 | 2.85122 | 4.86176 | 5.17806 | 4.70242 | 0.64884 | 0.3132358 | 2.85122 | pv | 0.3124692 | 4.861761 | py |
| PF13_0199 | PKH_121790 | PVX_082725 | PY03050 | PBANKA_134<br>960 | PCHAS_13542<br>0 | 4.04305 | 4.01618 | 3.23132 | 2.8717  | 3.06369 | 2.31994 | 0.50587 | 0.4247675 | 2.31994 | pc | 0.3280283 | 4.043049 | pf |
| PF13_0200 | PKH_121780 | PVX_082730 | PY03051 | PBANKA_134<br>970 | PCHAS_13543<br>0 | 3.96492 | 3.48435 | 3.37063 | 3.40141 | 3.77609 | 2.37922 | 0.34568 | 0.1937927 | 2.37922 | pc | 0.1220991 | 3.964922 | pf |
| PF13_0203 | PKH_121700 | PVX_082765 | PY01502 | PBANKA_135<br>050 | PCHAS_13551<br>0 | 1.51358 | 0.18696 | 0.31543 | 2.45857 | 5.71731 | 5.18054 | 0.96152 | 0.6995062 | 2.45857 | py | 0.6861729 | 5.717306 | pb |
| PF13_0204 | PKH_121690 | PVX_082770 | PY06251 | PBANKA_135<br>060 | PCHAS_13552<br>0 | 2.34402 | 2.56919 | 1.98454 | 2.70456 | 2.36081 | 2.412   | 0.16606 | 0.1137827 | 1.98454 | pv | 0.0690884 | 2.704558 | py |
| PF13_0205 | PKH_121680 | PVX_082775 | PY06252 | PBANKA_135<br>070 | PCHAS_13553<br>0 | 2.13556 | 4.39659 | 3.93024 | 1.89048 | 1.859   | 1.9996  | 0.78555 | 0.4632647 | 4.39659 | pk | 0.0964213 | 3.930242 | pv |
| PF13_0209 | PKH_121630 | PVX_082800 | PY04968 | PBANKA_135<br>120 | PCHAS_13558<br>0 | 1.67326 | 2.89047 | 2.26031 | 1.9768  | 2.93112 | 1.84019 | 0.43194 | 0.3274666 | 2.93112 | pb | 0.3751798 | 1.840187 | pc |
| PF13_0212 | PKH_121590 | PVX_082825 | PY02719 | PBANKA_135<br>160 | PCHAS_13562<br>0 | 0.55666 | 3.12363 | 2.80097 | 1.79783 | 3.174   | 2.79533 | 0.65813 | 0.3408948 | 0.55666 | pf | 0.3454512 | 3.123635 | pk |
| PF13_0213 | PKH_121560 | PVX_082840 | PY02722 | PBANKA_135<br>190 | PCHAS_13565<br>0 | 2.14451 | 2.59765 | 2.42247 | 0.80626 | 2.47135 | 2.23975 | 0.38349 | 0.1369479 | 0.80626 | py | 0.1589638 | 2.47135  | pb |
| PF13_0214 | PKH_121550 | PVX_082845 | PY07121 | PBANKA_135<br>200 | PCHAS_13566<br>0 | 2.84919 | 2.36267 | 3.34868 | 0.10518 | 3.01139 | 3.01181 | 0.67581 | 0.2297264 | 0.10518 | py | 0.287158  | 3.011387 | pb |
| PF13_0215 | PKH_121480 | PVX_082885 | PY00558 | PBANKA_135<br>270 | PCHAS_13573<br>0 | 2.23165 | 0.13005 | 3.87209 | 3.11212 | 1.13366 | 0.54823 | 1.23399 | 0.9330979 | 3.87209 | pv | 0.6717577 | 3.112122 | py |
| PF13_0221 | PKH_121370 | PVX_082940 | PY04558 | PBANKA_135<br>390 | PCHAS_13585<br>0 | 2.32092 | 5.45176 | 0.48334 | 0.10058 | 0.65721 | 2.61296 | 0.9731  | 0.7417945 | 2.61296 | pc | 0.5985526 | 5.451764 | pk |
| PF13_0222 | PKH_121360 | PVX_082945 | PY04559 | PBANKA_135<br>400 | PCHAS_13586<br>0 | 2.8474  | 3.57841 | 2.37897 | 3.99341 | 0.12521 | 1.99554 | 0.98659 | 0.6394649 | 0.12521 | pb | 0.5863637 | 1.995535 | pc |
| PF13_0223 | PKH_121340 | PVX_082955 | PY07365 | PBANKA_135<br>420 | PCHAS_13588<br>0 | 4.6584  | 4.0505  | 5.86203 | 5.02034 | 5.06341 | 5.25147 | 0.40794 | 0.2869501 | 4.0505  | pk | 0.1590328 | 5.862028 | pv |
| PF13_0224 | PKH_121320 | PVX_082965 | PY01391 | PBANKA_135<br>440 | PCHAS_13590<br>0 | 2.04805 | 2.42785 | 2.48136 | 2.64658 | 2.64449 | 1.76286 | 0.25561 | 0.1630331 | 1.76286 | pc | 0.0954657 | 2.048053 | pf |
| PF13_0226 | PKH_121270 | PVX_082990 | PY03088 | PBANKA_135<br>490 | PCHAS_13595<br>0 | 5.74389 | 5.83582 | 0.44676 | 6.14134 | 0.70337 | 3.99931 | 0.71314 | 0.4273572 | 3.99931 | pc | 0.3228946 | 0.703366 | pb |
| PF13_0227 | PKH_121260 | PVX_082995 | PY03087 | PBANKA_135<br>500 | PCHAS_13596<br>0 | 2.75405 | 0.33696 | 3.45852 | 2.73738 | 2.68686 | 0.85548 | 0.84511 | 0.5340459 | 0.33696 | pk | 0.4872727 | 3.458523 | pv |
| PF13_0228 | PKH_121250 | PVX_083000 | PY06397 | PBANKA_135<br>510 | PCHAS_13597<br>0 | 2.15631 | 2.73287 | 2.57929 | 2.10916 | 2.44386 | 2.16496 | 0.22093 | 0.1515356 | 2.73287 | pk | 0.0858371 | 2.579288 | pv |



|           |            |            |         |                   |                  |         |         |         |         |         |         |         |           |         |    |           |          |    |
|-----------|------------|------------|---------|-------------------|------------------|---------|---------|---------|---------|---------|---------|---------|-----------|---------|----|-----------|----------|----|
| PF13_0229 | PKH_121240 | PVX_083005 | PY00319 | PBANKA_135<br>520 | PCHAS_13598<br>0 | 5.1903  | 4.38056 | 3.55188 | 6.02855 | 4.45213 | 4.4405  | 0.54967 | 0.3419974 | 6.02855 | py | 0.4245906 | 4.452126 | pb |
| PF13_0232 | PKH_121210 | PVX_083020 | PY01577 | PBANKA_135<br>550 | PCHAS_13601<br>0 | 2.95834 | 3.16245 | 2.44342 | 1.24922 | 2.53773 | 3.06509 | 0.49258 | 0.2492783 | 1.24922 | py | 0.2064475 | 2.537734 | pb |
| PF13_0233 | PKH_121190 | PVX_083030 | PY01232 | PBANKA_135<br>570 | PCHAS_13603<br>0 | 6.10768 | 0.24792 | 6.21057 | 5.53554 | 6.23441 | 6.1672  | 0.19428 | 0.0981265 | 5.53554 | py | 0.1166966 | 6.234412 | pb |
| PF13_0234 | PKH_121170 | PVX_083035 | PY01233 | PBANKA_135<br>590 | PCHAS_13605<br>0 | 2.45567 | 2.31248 | 2.08619 | 3.63972 | 1.76675 | 1.5446  | 0.50172 | 0.2913603 | 3.63972 | py | 0.2843392 | 1.766749 | pb |
| PF13_0235 | PKH_121160 | PVX_083040 | PY01234 | PBANKA_135<br>600 | PCHAS_13606<br>0 | 2.16148 | 2.74991 | 1.9988  | 1.21852 | 0.99075 | 1.79848 | 0.48374 | 0.3902036 | 2.74991 | pk | 0.4376732 | 1.998802 | pv |
| PF13_0236 | PKH_121130 | PVX_083055 | PY05490 | PBANKA_135<br>620 | PCHAS_13608<br>0 | 1.88922 | 2.75366 | 3.57971 | 2.33226 | 5.72419 | 4.94833 | 1.21285 | 0.8613122 | 5.72419 | pb | 0.5279729 | 4.948333 | pc |
| PF13_0237 | PKH_121120 | PVX_083060 | PY05489 | PBANKA_135<br>630 | PCHAS_13609<br>0 | 3.72683 | 4.52698 | 4.50041 | 3.01347 | 4.35149 | 4.55981 | 0.4159  | 0.201694  | 3.01347 | py | 0.2148881 | 4.351489 | pb |
| PF13_0238 | PKH_121080 | PVX_083080 | PY02946 | PBANKA_135<br>670 | PCHAS_13613<br>0 | 0.50942 | 0.32847 | 5.47468 | 0.61886 | 0.36076 | 5.98213 | 0.37836 | 0.2201748 | 5.47468 | pv | 0.2106928 | 0.618861 | py |
| PF13_0239 | PKH_120970 | PVX_083130 | PY06209 | PBANKA_135<br>760 | PCHAS_13622<br>0 | 1.57458 | 2.88634 | 3.43141 | 5.47069 | 0.82536 | 1.61972 | 1.05834 | 0.7835618 | 5.47069 | py | 0.7808621 | 0.82536  | pb |
| PF13_0241 | PKH_120920 | PVX_083160 | PY00587 | PBANKA_135<br>810 | PCHAS_13627<br>0 | 3.57571 | 3.48424 | 2.15504 | 0.46282 | 2.49063 | 3.61481 | 0.92771 | 0.5089677 | 0.46282 | py | 0.3878073 | 2.490632 | pb |
| PF13_0242 | PKH_120870 | PVX_083185 | PY00592 | PBANKA_135<br>860 | PCHAS_13632<br>0 | 3.59856 | 3.38031 | 3.45141 | 3.35346 | 3.70322 | 3.67614 | 0.13212 | 0.1081864 | 3.70322 | pb | 0.0790504 | 3.67614  | pc |
| PF13_0245 | PKH_120770 | PVX_083225 | PY01328 | PBANKA_135<br>940 | PCHAS_13640<br>0 | 1.87902 | 3.11353 | 3.21828 | 1.98296 | 1.22396 | 1.8342  | 0.56293 | 0.4076649 | 3.21828 | pv | 0.4835964 | 1.982959 | py |
| PF13_0246 | PKH_120760 | PVX_083230 | PY01327 | PBANKA_135<br>950 | PCHAS_13641<br>0 | 4.87543 | 3.1578  | 3.52167 | 2.77076 | 4.18425 | 4.21207 | 0.63692 | 0.4935516 | 4.87543 | pf | 0.5259721 | 3.157798 | pk |
| PF13_0249 | PKH_120700 | PVX_083245 | PY01130 | PBANKA_135<br>980 | PCHAS_13644<br>0 | 4.67711 | 4.66196 | 4.41073 | 3.87388 | 5.34161 | 5.0143  | 0.34774 | 0.2566431 | 3.87388 | py | 0.1546807 | 5.341606 | pb |
| PF13_0250 | PKH_120690 | PVX_083250 | PY01132 | PBANKA_135<br>990 | PCHAS_13645<br>0 | 2.00774 | 0.06982 | 6.25744 | 4.10823 | 3.94893 | 0.01588 | 1.10473 | 0.9189837 | 2.00774 | pf | 1.1248392 | 0.069819 | pk |
| PF13_0253 | PKH_120620 | PVX_083280 | PY06073 | PBANKA_136<br>050 | PCHAS_13651<br>0 | 0.28231 | 0.11561 | 0.91073 | 2.50927 | 0.56427 | 0.46079 | 0.52093 | 0.2154174 | 2.50927 | py | 0.2434011 | 0.564273 | pb |
| PF13_0256 | PKH_120500 | PVX_083340 | PY02889 | PBANKA_136<br>170 | PCHAS_13663<br>0 | 1.39682 | 2.27349 | 1.98864 | 0.11808 | 3.41368 | 1.13047 | 0.83841 | 0.6027181 | 3.41368 | pb | 0.6868092 | 1.130466 | pc |
| PF13_0257 | PKH_120470 | PVX_083355 | PY02891 | PBANKA_136<br>200 | PCHAS_13666<br>0 | 1.93151 | 1.6396  | 1.95855 | 2.10785 | 2.22177 | 1.95744 | 0.1266  | 0.0881327 | 1.6396  | pk | 0.1101658 | 1.958554 | pv |
| PF13_0258 | PKH_120460 | PVX_083360 | PY04013 | PBANKA_136<br>210 | PCHAS_13667<br>0 | 5.52214 | 4.46834 | 5.08671 | 5.16519 | 5.37095 | 5.51639 | 0.28154 | 0.1573251 | 4.46834 | pk | 0.1255984 | 5.086714 | pv |
| PF13_0259 | PKH_120450 | PVX_083365 | PY04017 | PBANKA_136<br>220 | PCHAS_13668<br>0 | 1.95731 | 3.55629 | 3.12262 | 2.06427 | 4.15046 | 1.67874 | 0.85484 | 0.6085722 | 4.15046 | pb | 0.6643319 | 1.678736 | pc |
| PF13_0260 | PKH_120420 | PVX_083380 | PY00113 | PBANKA_136<br>250 | PCHAS_13671<br>0 | 4.83743 | 4.52069 | 0.07283 | 5.1268  | 6.28143 | 5.49124 | 0.60729 | 0.482907  | 0.07283 | pv | 0.6036337 | 5.126802 | py |
| PF13_0261 | PKH_120410 | PVX_083385 | PY00114 | PBANKA_136<br>260 | PCHAS_13672<br>0 | 1.55168 | 2.71332 | 2.19472 | 2.48525 | 1.90553 | 1.53847 | 0.3996  | 0.317964  | 2.71332 | pk | 0.3251555 | 2.194724 | pv |

|           |            |            |         |                   |                  |         |         |         |         |         |         |         |           |         |    |           |          |    |
|-----------|------------|------------|---------|-------------------|------------------|---------|---------|---------|---------|---------|---------|---------|-----------|---------|----|-----------|----------|----|
| PF13_0262 | PKH_120380 | PVX_083400 | PY00115 | PBANKA_136<br>290 | PCHAS_13675<br>0 | 2.61322 | 2.41772 | 2.7625  | 5.24994 | 3.00477 | 3.12935 | 0.59844 | 0.220636  | 5.24994 | py | 0.2152262 | 3.004773 | pb |
| PF13_0263 | PKH_120360 | PVX_083410 | PY05605 | PBANKA_136<br>310 | PCHAS_13677<br>0 | 1.72442 | 1.35772 | 2.46896 | 2.34858 | 0.5036  | 2.38198 | 0.6023  | 0.3537605 | 0.5036  | pb | 0.4338509 | 2.38198  | pc |
| PF13_0264 | PKH_120350 | PVX_083415 | PY05606 | PBANKA_136<br>320 | PCHAS_13678<br>0 | 4.16626 | 1.11128 | 2.59421 | 5.05502 | 5.27618 | 2.08678 | 1.45087 | 1.1300446 | 1.11128 | pk | 1.0195436 | 2.594208 | pv |
| PF13_0268 | PKH_120250 | PVX_083465 | PY00934 | PBANKA_136<br>420 | PCHAS_13688<br>0 | 2.25436 | 2.29242 | 2.66576 | 2.4534  | 2.40891 | 2.56676 | 0.12171 | 0.0946753 | 2.66576 | pv | 0.10722   | 2.453403 | py |
| PF13_0269 | PKH_120240 | PVX_083470 | PY00935 | PBANKA_136<br>430 | PCHAS_13689<br>0 | 1.42488 | 2.88013 | 0.14688 | 4.8731  | 4.05705 | 3.91798 | 1.18954 | 0.90101   | 1.42488 | pf | 0.832033  | 2.88013  | pk |
| PF13_0271 | PKH_120190 | PVX_083495 | PY07088 | PBANKA_136<br>480 | PCHAS_13694<br>0 | 1.21446 | 1.29384 | 1.92046 | 1.60806 | 0.70426 | 0.71066 | 0.3655  | 0.2973968 | 1.92046 | pv | 0.2733462 | 1.608061 | py |
| PF13_0272 | PKH_120150 | PVX_083515 | PY06242 | PBANKA_136<br>520 | PCHAS_13698<br>0 | 4.04689 | 4.20589 | 1.77461 | 4.55111 | 6.16889 | 4.59739 | 0.88167 | 0.5027002 | 1.77461 | pv | 0.6283752 | 4.551112 | py |
| PF13_0273 | PKH_120120 | PVX_083530 | PY01194 | PBANKA_136<br>530 | PCHAS_13699<br>0 | 2.16525 | 3.00486 | 2.80347 | 2.87764 | 2.60605 | 2.13757 | 0.29619 | 0.222242  | 2.13757 | pc | 0.1182465 | 2.165248 | pf |
| PF13_0274 | PKH_120110 | PVX_083535 | PY02732 | PBANKA_136<br>540 | PCHAS_13700<br>0 | 2.79182 | 3.53916 | 3.25548 | 2.136   | 3.19917 | 3.16957 | 0.31607 | 0.166649  | 2.136   | py | 0.2083112 | 3.199175 | pb |
| PF13_0277 | PKH_111780 | PVX_114655 | PY00833 | PBANKA_112<br>990 | PCHAS_11294<br>0 | 3.63026 | 3.56759 | 0.433   | 1.04872 | 4.12563 | 1.62917 | 1.36877 | 1.0156001 | 0.433   | pv | 0.6397816 | 1.048716 | py |
| PF13_0279 | PKH_111760 | PVX_114665 | PY04660 | PBANKA_113<br>010 | PCHAS_11296<br>0 | 2.898   | 3.67637 | 3.47954 | 5.19277 | 3.42888 | 2.64127 | 0.56342 | 0.3233275 | 5.19277 | py | 0.4041594 | 3.428884 | pb |
| PF13_0281 | PKH_111740 | PVX_114675 | PY05550 | PBANKA_113<br>030 | PCHAS_11298<br>0 | 2.34199 | 2.89939 | 1.99124 | 2.16383 | 3.05541 | 2.56986 | 0.33794 | 0.2628382 | 3.05541 | pb | 0.2715795 | 2.56986  | pc |
| PF13_0282 | PKH_111730 | PVX_114680 | PY02352 | PBANKA_113<br>040 | PCHAS_11299<br>0 | 3.6015  | 4.42159 | 3.30562 | 3.1294  | 3.28919 | 3.64452 | 0.3239  | 0.1654861 | 4.42159 | pk | 0.2068576 | 3.305622 | pv |
| PF13_0284 | PKH_111710 | PVX_114690 | PY02349 | PBANKA_113<br>070 | PCHAS_11302<br>0 | 2.1714  | 3.19211 | 3.25616 | 5.18224 | 3.27334 | 3.71679 | 0.59212 | 0.3253235 | 5.18224 | py | 0.4023604 | 3.273338 | pb |
| PF13_0285 | PKH_111700 | PVX_114695 | PY02348 | PBANKA_113<br>080 | PCHAS_11303<br>0 | 5.59003 | 1.02096 | 0.45828 | 2.49178 | 3.80732 | 0.33284 | 1.13453 | 0.7746123 | 3.80732 | pb | 0.9369059 | 0.33284  | pc |
| PF13_0287 | PKH_111670 | PVX_114710 | PY03301 | PBANKA_113<br>110 | PCHAS_11306<br>0 | 2.7665  | 2.60499 | 2.01518 | 2.75697 | 2.20663 | 2.6142  | 0.21848 | 0.1423714 | 2.01518 | pv | 0.1422725 | 2.756967 | py |
| PF13_0290 | PKH_111630 | PVX_114730 | PY04889 | PBANKA_113<br>150 | PCHAS_11310<br>0 | 2.93494 | 4.10917 | 5.21451 | 2.09358 | 4.24259 | 2.28205 | 1.04262 | 0.7952266 | 5.21451 | pv | 0.7836942 | 2.093582 | py |
| PF13_0291 | PKH_111620 | PVX_114735 | PY04888 | PBANKA_113<br>160 | PCHAS_11311<br>0 | 4.39633 | 0.41557 | 5.11855 | 3.72947 | 5.83541 | 4.52709 | 0.8333  | 0.5656307 | 0.41557 | pk | 0.5591732 | 5.118548 | pv |
| PF13_0292 | PKH_111610 | PVX_114740 | PY04887 | PBANKA_113<br>170 | PCHAS_11312<br>0 | 1.81168 | 2.37751 | 3.63178 | 2.66856 | 2.39131 | 1.12955 | 0.56215 | 0.4237263 | 3.63178 | pv | 0.4568959 | 2.668562 | py |
| PF13_0293 | PKH_111600 | PVX_114745 | PY04885 | PBANKA_113<br>180 | PCHAS_11313<br>0 | 1.42399 | 2.75916 | 2.14867 | 4.21086 | 3.10579 | 1.62144 | 0.81362 | 0.5639029 | 4.21086 | py | 0.4655995 | 3.105788 | pb |
| PF13_0298 | PKH_111500 | PVX_114780 | PY04629 | PBANKA_113<br>230 | PCHAS_11318<br>0 | 4.44105 | 0.73863 | 0.72671 | 4.96919 | 4.73805 | 1.83678 | 1.33084 | 0.9705203 | 1.83678 | pc | 1.0811177 | 4.441054 | pf |
| PF13_0299 | PKH_111490 | PVX_114785 | PY04919 | PBANKA_113<br>240 | PCHAS_11319<br>0 | 5.00276 | 3.86558 | 1.86917 | 0.16177 | 3.80772 | 4.57488 | 1.08002 | 0.7548837 | 1.86917 | pv | 0.4760851 | 0.161773 | py |

|           |            |            |         |                   |                  |         |         |         |         |         |         |         |           |         |    |           |          |    |
|-----------|------------|------------|---------|-------------------|------------------|---------|---------|---------|---------|---------|---------|---------|-----------|---------|----|-----------|----------|----|
| PF13_0300 | PKH_111480 | PVX_114790 | PY04920 | PBANKA_113<br>250 | PCHAS_11320<br>0 | 2.56701 | 1.5725  | 1.50765 | 0.37617 | 2.73194 | 1.64803 | 0.58178 | 0.4437598 | 0.37617 | py | 0.2837224 | 2.731937 | pb |
| PF13_0301 | PKH_111470 | PVX_114795 | PY01609 | PBANKA_113<br>260 | PCHAS_11321<br>0 | 5.39629 | 5.6763  | 5.01846 | 5.46428 | 3.4493  | 5.0711  | 0.49967 | 0.2102026 | 3.4493  | pb | 0.1814563 | 5.0711   | pc |
| PF13_0302 | PKH_111460 | PVX_114800 | PY01608 | PBANKA_113<br>270 | PCHAS_11322<br>0 | 3.11502 | 5.51823 | 4.18566 | 6.19072 | 0.88412 | 3.71425 | 1.31022 | 0.9759339 | 0.88412 | pb | 1.1020664 | 3.714253 | pc |
| PF13_0303 | PKH_111440 | PVX_114810 | PY02933 | PBANKA_113<br>290 | PCHAS_11324<br>0 | 1.64417 | 4.78349 | 5.35812 | 5.45999 | 5.8432  | 5.67043 | 0.6399  | 0.2744059 | 1.64417 | pf | 0.1738824 | 4.783488 | pk |
| PF13_0307 | PKH_111360 | PVX_114845 | PY00365 | PBANKA_113<br>370 | PCHAS_11332<br>0 | 3.52666 | 3.72193 | 4.95412 | 2.38374 | 3.14515 | 1.92367 | 0.79169 | 0.5882363 | 4.95412 | pv | 0.5449415 | 2.383739 | py |
| PF13_0310 | PKH_111290 | PVX_114880 | PY06014 | PBANKA_113<br>440 | PCHAS_11339<br>0 | 1.62552 | 0.88448 | 1.94313 | 1.92204 | 0.69545 | 5.98734 | 0.7011  | 0.4570485 | 5.98734 | pc | 0.4919079 | 1.943132 | pv |
| PF13_0313 | PKH_111250 | PVX_114895 | PY01182 | PBANKA_113<br>480 | PCHAS_11343<br>0 | 1.92158 | 1.23537 | 2.4577  | 2.21479 | 1.21235 | 2.26716 | 0.42839 | 0.3135795 | 1.21235 | pb | 0.3788843 | 2.267155 | pc |
| PF13_0314 | PKH_111240 | PVX_114900 | PY01183 | PBANKA_113<br>490 | PCHAS_11344<br>0 | 6.14778 | 4.98418 | 0.48586 | 0.02656 | 0.12995 | 4.703   | 0.60949 | 0.4100425 | 4.703   | pc | 0.1811635 | 4.984184 | pk |
| PF13_0315 | PKH_111140 | PVX_114940 | PY02887 | PBANKA_113<br>570 | PCHAS_11352<br>0 | 2.21099 | 3.00902 | 4.15888 | 2.95032 | 1.12151 | 4.36168 | 0.87446 | 0.6718483 | 1.12151 | pb | 0.5016473 | 4.361676 | pc |
| PF13_0316 | PKH_111200 | PVX_114910 | PY03929 | PBANKA_113<br>510 | PCHAS_11346<br>0 | 2.3979  | 2.25931 | 2.56894 | 2.33151 | 2.13697 | 1.80447 | 0.18293 | 0.1141122 | 1.80447 | pc | 0.0832811 | 2.568944 | pv |
| PF13_0319 | PKH_111040 | PVX_114985 | PY00950 | PBANKA_113<br>660 | PCHAS_11361<br>0 | 2.4987  | 3.17143 | 1.70295 | 5.6899  | 3.29917 | 2.8498  | 0.85151 | 0.4537893 | 5.6899  | py | 0.4548945 | 3.299165 | pb |
| PF13_0327 | PKH_110900 | PVX_115045 | PY01089 | PBANKA_113<br>770 | PCHAS_11372<br>0 | 5.03725 | 4.6219  | 4.22159 | 5.48137 | 4.54899 | 4.5198  | 0.30836 | 0.1835527 | 5.48137 | py | 0.2294409 | 4.548987 | pb |
| PF13_0328 | PKH_110880 | PVX_115055 | PY01758 | PBANKA_113<br>790 | PCHAS_11374<br>0 | 4.01939 | 4.14836 | 4.84572 | 3.93521 | 4.23859 | 4.37635 | 0.22628 | 0.1320681 | 4.84572 | pv | 0.1117968 | 3.93521  | py |
| PF13_0329 | PKH_110870 | PVX_115060 | PY06706 | PBANKA_113<br>800 | PCHAS_11375<br>0 | 5.34392 | 6.18613 | 4.3792  | 5.5814  | 4.41424 | 4.75122 | 0.59447 | 0.4263776 | 6.18613 | pk | 0.4399665 | 4.379197 | pv |
| PF13_0330 | PKH_110850 | PVX_115065 | PY05342 | PBANKA_113<br>820 | PCHAS_11377<br>0 | 2.06481 | 2.86251 | 1.54344 | 2.79853 | 2.0684  | 2.75388 | 0.45638 | 0.3055659 | 1.54344 | pv | 0.3707936 | 2.798532 | py |
| PF13_0331 | PKH_110840 | PVX_115070 | PY00975 | PBANKA_113<br>830 | PCHAS_11378<br>0 | 2.28927 | 2.81946 | 0.82761 | 5.61626 | 3.52673 | 4.73151 | 1.32303 | 1.028272  | 5.61626 | py | 1.1085237 | 3.526729 | pb |
| PF13_0335 | PKH_110730 | PVX_115125 | PY05801 | PBANKA_113<br>940 | PCHAS_11389<br>0 | 3.106   | 3.97635 | 3.7517  | 2.98504 | 2.5165  | 6.23908 | 0.89326 | 0.4453004 | 6.23908 | pc | 0.4092513 | 2.516504 | pb |
| PF13_0341 | PKH_110590 | PVX_115200 | PY02779 | PBANKA_114<br>060 | PCHAS_11401<br>0 | 1.60003 | 1.86968 | 2.24657 | 0.29999 | 1.79007 | 1.93814 | 0.39405 | 0.1589206 | 0.29999 | py | 0.1787486 | 1.790072 | pb |
| PF13_0344 | PKH_110530 | PVX_115230 | PY02846 | PBANKA_114<br>120 | PCHAS_11407<br>0 | 2.01054 | 2.60128 | 3.50506 | 1.56689 | 1.86048 | 0.68853 | 0.66683 | 0.4712819 | 3.50506 | pv | 0.5157035 | 1.566885 | py |
| PF13_0347 | PKH_110470 | PVX_115260 | PY03338 | PBANKA_114<br>180 | PCHAS_11413<br>0 | 1.26254 | 3.19396 | 3.12242 | 2.23651 | 2.52368 | 0.89065 | 0.74173 | 0.5634664 | 0.89065 | pc | 0.3890484 | 1.262537 | pf |
| PF13_0348 | PKH_110420 | PVX_115280 | PY03152 | PBANKA_114<br>230 | PCHAS_11418<br>0 | 2.98382 | 2.45068 | 2.81186 | 2.4506  | 0.98561 | 1.37979 | 0.57173 | 0.3930576 | 0.98561 | pb | 0.2236009 | 1.379793 | pc |
| PF13_0349 | PKH_110410 | PVX_115285 | PY04911 | PBANKA_114<br>240 | PCHAS_11419<br>0 | 3.95664 | 4.19757 | 5.66384 | 5.14428 | 4.71768 | 3.93475 | 0.5728  | 0.3941124 | 5.66384 | pv | 0.2559643 | 5.144277 | py |

|            |            |            |         |                   |                  |         |         |         |         |         |         |         |           |         |    |           |          |    |
|------------|------------|------------|---------|-------------------|------------------|---------|---------|---------|---------|---------|---------|---------|-----------|---------|----|-----------|----------|----|
| PF13_0351  | PKH_110390 | PVX_115295 | PY06102 | PBANKA_114<br>260 | PCHAS_11421<br>0 | 0.64458 | 2.52614 | 1.73639 | 5.43898 | 2.89369 | 1.75697 | 0.94001 | 0.6077723 | 5.43898 | py | 0.4755349 | 2.893693 | pb |
| PF13_0353  | PKH_110300 | PVX_115335 | PY03083 | PBANKA_114<br>340 | PCHAS_11429<br>0 | 4.51511 | 4.24352 | 5.64622 | 3.61077 | 0.58065 | 5.09831 | 0.87316 | 0.5780462 | 0.58065 | pb | 0.5767582 | 5.098308 | pc |
| PF13_0354  | PKH_110280 | PVX_115345 | PY03081 | PBANKA_114<br>360 | PCHAS_11431<br>0 | 2.12288 | 3.00352 | 2.65496 | 2.1302  | 1.40288 | 2.07955 | 0.3639  | 0.2912102 | 1.40288 | pb | 0.3513522 | 2.079554 | pc |
| PF13_0356  | PKH_110210 | PVX_115380 | PY04217 | PBANKA_114<br>430 | PCHAS_11438<br>0 | 4.23529 | 4.66402 | 0.23423 | 2.71571 | 4.80684 | 4.55406 | 0.7472  | 0.50397   | 0.23423 | pv | 0.1703767 | 2.715715 | py |
| PF13_0357  | PKH_110200 | PVX_115385 | PY05706 | PBANKA_114<br>440 | PCHAS_11439<br>0 | 2.19373 | 2.76984 | 3.41908 | 2.6029  | 3.48692 | 2.48285 | 0.39939 | 0.3024667 | 3.48692 | pb | 0.3480705 | 2.48285  | pc |
| PF13_0360  | PKH_110140 | PVX_115415 | PY04539 | PBANKA_114<br>500 | PCHAS_11445<br>0 | 2.00051 | 2.70551 | 2.42758 | 5.50548 | 2.54364 | 2.76129 | 0.66676 | 0.2077423 | 5.50548 | py | 0.2596778 | 2.543639 | pb |
| PF13_0361  | PKH_110090 | PVX_115440 | PY01143 | PBANKA_114<br>560 | PCHAS_11451<br>0 | 3.76495 | 3.71819 | 3.08062 | 2.84964 | 3.35934 | 2.77438 | 0.35631 | 0.2907028 | 3.76495 | pf | 0.2039859 | 3.718191 | pk |
| PF14_0020  | PKH_134520 | PVX_086340 | PY00116 | PBANKA_104<br>010 | PCHAS_10409<br>0 | 4.79473 | 5.90211 | 2.64781 | 4.86849 | 1.44912 | 0.56356 | 1.32412 | 0.9831663 | 2.64781 | pv | 0.970553  | 4.868486 | py |
| PF14_0023  | PKH_134490 | PVX_086325 | PY00117 | PBANKA_103<br>980 | PCHAS_10406<br>0 | 2.26135 | 2.71653 | 2.29309 | 3.07026 | 1.49661 | 2.92567 | 0.44357 | 0.2882987 | 1.49661 | pb | 0.3080876 | 2.925673 | pc |
| PF14_0024  | PKH_134480 | PVX_086320 | PY00118 | PBANKA_103<br>970 | PCHAS_10405<br>0 | 5.28952 | 5.47234 | 4.73218 | 5.03111 | 4.07588 | 4.49411 | 0.41513 | 0.3071134 | 4.07588 | pb | 0.2496413 | 4.494113 | pc |
| PF14_0025  | PKH_134470 | PVX_086315 | PY00119 | PBANKA_103<br>960 | PCHAS_10404<br>0 | 3.71589 | 4.75024 | 3.7456  | 5.77679 | 2.96525 | 3.70552 | 0.64766 | 0.3650128 | 5.77679 | py | 0.2686047 | 2.965249 | pb |
| PF14_0026  | PKH_134460 | PVX_086310 | PY00121 | PBANKA_103<br>950 | PCHAS_10403<br>0 | 2.90465 | 0.29826 | 4.9599  | 2.7718  | 3.96605 | 2.12212 | 1.1064  | 0.8064063 | 0.29826 | pk | 0.4941953 | 4.959904 | pv |
| PF14_0027  | PKH_134450 | PVX_086305 | PY00122 | PBANKA_103<br>940 | PCHAS_10402<br>0 | 2.28527 | 2.11459 | 2.59425 | 2.51265 | 2.26996 | 1.47383 | 0.25563 | 0.1444701 | 1.47383 | pc | 0.1033411 | 2.594254 | pv |
| PF14_0028  | PKH_134440 | PVX_086295 | PY00123 | PBANKA_103<br>930 | PCHAS_10401<br>0 | 2.08655 | 1.0721  | 2.4987  | 2.11754 | 3.63838 | 2.73937 | 0.60004 | 0.4347321 | 1.0721  | pk | 0.5434152 | 2.498704 | pv |
| PF14_0029  | PKH_134430 | PVX_086290 | PY00124 | PBANKA_103<br>920 | PCHAS_10400<br>0 | 4.93186 | 5.5219  | 6.08562 | 4.53925 | 5.20273 | 5.39722 | 0.38848 | 0.2896028 | 6.08562 | pv | 0.1961326 | 4.539246 | py |
| PF14_0029a | PKH_134420 | PVX_086285 | PY00125 | PBANKA_103<br>910 | PCHAS_10399<br>0 | 5.53699 | 1.94273 | 3.72634 | 4.793   | 2.38083 | 2.33046 | 1.22886 | 0.8492318 | 5.53699 | pf | 0.9520147 | 1.942729 | pk |
| PF14_0030  | PKH_134400 | PVX_086280 | PY00126 | PBANKA_103<br>900 | PCHAS_10398<br>0 | 1.29848 | 5.09804 | 5.64108 | 4.19122 | 5.56126 | 2.44441 | 1.17506 | 0.7866965 | 2.44441 | pc | 0.4782701 | 1.298481 | pf |
| PF14_0031a | PKH_134380 | PVX_086275 | PY00128 | PBANKA_103<br>890 | PCHAS_10397<br>0 | 4.34954 | 4.79887 | 5.30886 | 5.29235 | 0.12381 | 4.82947 | 0.50505 | 0.2905581 | 0.12381 | pb | 0.3631977 | 4.829475 | pc |
| PF14_0032  | PKH_134340 | PVX_086265 | PY05274 | PBANKA_103<br>860 | PCHAS_10394<br>0 | 4.28584 | 3.63166 | 5.94037 | 5.66859 | 0.26416 | 1.95013 | 1.18916 | 0.9140431 | 1.95013 | pc | 0.6333214 | 3.631655 | pk |
| PF14_0034  | PKH_134320 | PVX_086250 | PY00812 | PBANKA_103<br>830 | PCHAS_10391<br>0 | 0.38153 | 5.55993 | 5.44774 | 2.15127 | 2.90871 | 6.02377 | 1.2011  | 0.818302  | 2.90871 | pb | 1.0228775 | 6.023775 | pc |
| PF14_0037  | PKH_134290 | PVX_086235 | PY05431 | PBANKA_103<br>810 | PCHAS_10389<br>0 | 4.273   | 3.34938 | 2.88352 | 0.01084 | 3.18824 | 3.12368 | 0.78683 | 0.3230372 | 0.01084 | py | 0.4037965 | 3.188236 | pb |
| PF14_0038  | PKH_134280 | PVX_086230 | PY05430 | PBANKA_103<br>800 | PCHAS_10388<br>0 | 2.74093 | 2.32625 | 1.71929 | 3.61181 | 4.22305 | 4.29019 | 0.88976 | 0.689211  | 1.71929 | pv | 0.8615137 | 3.611815 | py |

|           |            |            |         |               |              |         |         |         |         |         |         |         |           |         |    |           |          |    |
|-----------|------------|------------|---------|---------------|--------------|---------|---------|---------|---------|---------|---------|---------|-----------|---------|----|-----------|----------|----|
| PF14_0041 | PKH_134250 | PVX_086215 | PY00995 | PBANKA_103770 | PCHAS_103850 | 1.39297 | 4.3424  | 3.32627 | 4.03743 | 2.33361 | 4.07395 | 0.90016 | 0.5512964 | 1.39297 | pf | 0.6128768 | 4.342405 | pk |
| PF14_0042 | PKH_134240 | PVX_086210 | PY00994 | PBANKA_103760 | PCHAS_103840 | 1.50938 | 1.33442 | 0.22712 | 2.04535 | 0.06824 | 1.36374 | 0.54811 | 0.3986371 | 0.06824 | pb | 0.4982964 | 1.363742 | pc |
| PF14_0044 | PKH_134220 | PVX_086200 | PY06764 | PBANKA_103740 | PCHAS_103820 | 0.11361 | 0.10928 | 5.8714  | 5.90293 | 6.14665 | 5.90596 | 0.20927 | 0.1529552 | 0.11361 | pf | 0.0695674 | 0.109279 | pk |
| PF14_0047 | PKH_134190 | PVX_086185 | PY05594 | PBANKA_103720 | PCHAS_103800 | 2.2255  | 4.61582 | 1.94856 | 6.22592 | 4.50926 | 1.43033 | 1.33816 | 1.0723381 | 4.61582 | pk | 1.3404226 | 1.948561 | pv |
| PF14_0050 | PKH_134160 | PVX_086170 | PY07061 | PBANKA_103690 | PCHAS_103770 | 3.64138 | 3.68796 | 3.04912 | 2.57295 | 3.84334 | 2.34797 | 0.53377 | 0.3818439 | 2.34797 | pc | 0.2101974 | 2.572953 | py |
| PF14_0051 | PKH_134150 | PVX_086165 | PY03673 | PBANKA_103680 | PCHAS_103760 | 3.28771 | 3.39825 | 2.56527 | 3.59573 | 2.73399 | 2.85669 | 0.35429 | 0.27734   | 3.59573 | py | 0.3160007 | 2.733988 | pb |
| PF14_0053 | PKH_134130 | PVX_086155 | PY03671 | PBANKA_103660 | PCHAS_103740 | 4.09466 | 4.08343 | 4.71028 | 4.34295 | 4.48709 | 4.41011 | 0.18107 | 0.1438215 | 4.71028 | pv | 0.1797769 | 4.34295  | py |
| PF14_0055 | PKH_134110 | PVX_086145 | PY05281 | PBANKA_103640 | PCHAS_103720 | 1.36441 | 1.28547 | 1.8805  | 0.64725 | 0.44403 | 1.55784 | 0.40433 | 0.3011229 | 0.44403 | pb | 0.3280449 | 1.557845 | pc |
| PF14_0056 | PKH_134100 | PVX_086140 | PY05280 | PBANKA_103630 | PCHAS_103710 | 1.51055 | 1.0675  | 1.94847 | 0.2175  | 0.47056 | 0.784   | 0.50908 | 0.3779974 | 1.94847 | pv | 0.3308728 | 0.2175   | py |
| PF14_0057 | PKH_134090 | PVX_086130 | PY04111 | PBANKA_103620 | PCHAS_103700 | 2.60049 | 3.35865 | 2.42268 | 0.17914 | 3.19573 | 2.96973 | 0.7203  | 0.3062402 | 0.17914 | py | 0.326302  | 3.195728 | pb |
| PF14_0059 | PKH_134070 | PVX_086120 | PY04114 | PBANKA_103600 | PCHAS_103680 | 2.15419 | 2.48555 | 2.6473  | 2.43269 | 0.99795 | 1.66887 | 0.45742 | 0.2619573 | 0.99795 | pb | 0.1364921 | 1.668871 | pc |
| PF14_0060 | PKH_134060 | PVX_086115 | PY03220 | PBANKA_103590 | PCHAS_103670 | 3.64024 | 0.69226 | 0.23648 | 0.87134 | 0.32768 | 6.05488 | 0.75434 | 0.311085  | 3.64024 | pf | 0.297711  | 0.692262 | pk |
| PF14_0063 | PKH_134030 | PVX_086100 | PY06430 | PBANKA_103560 | PCHAS_103640 | 4.31867 | 2.88564 | 3.35441 | 1.22142 | 2.88387 | 1.96082 | 0.74877 | 0.5656765 | 1.22142 | py | 0.7066536 | 2.883873 | pb |
| PF14_0064 | PKH_134020 | PVX_086095 | PY06431 | PBANKA_103550 | PCHAS_103630 | 4.14443 | 5.01873 | 4.04757 | 5.61679 | 3.90056 | 4.2278  | 0.46179 | 0.2596796 | 5.61679 | py | 0.2636324 | 3.900564 | pb |
| PF14_0065 | PKH_134010 | PVX_086090 | PY06432 | PBANKA_103540 | PCHAS_103620 | 5.38553 | 5.65801 | 5.77179 | 5.65809 | 5.52682 | 5.26858 | 0.15116 | 0.1035035 | 5.26858 | pc | 0.1009355 | 5.771788 | pv |
| PF14_0066 | PKH_134000 | PVX_086085 | PY01072 | PBANKA_103530 | PCHAS_103610 | 3.54349 | 5.15435 | 3.99812 | 0.30979 | 2.87806 | 1.63108 | 1.28214 | 0.9286667 | 0.30979 | py | 0.9944754 | 2.87806  | pb |
| PF14_0069 | PKH_133970 | PVX_086070 | PY01070 | PBANKA_103500 | PCHAS_103580 | 0.42289 | 5.97271 | 5.58301 | 2.10704 | 4.52663 | 0.34017 | 0.93955 | 0.643957  | 2.10704 | py | 0.4434267 | 4.526628 | pb |
| PF14_0070 | PKH_133960 | PVX_086065 | PY02472 | PBANKA_103490 | PCHAS_103570 | 0.92819 | 2.54719 | 2.72509 | 2.55672 | 1.5459  | 1.12265 | 0.70538 | 0.5226513 | 0.92819 | pf | 0.6533141 | 2.547189 | pk |
| PF14_0071 | PKH_133950 | PVX_086060 | PY02471 | PBANKA_103480 | PCHAS_103560 | 2.61883 | 2.65834 | 5.6651  | 3.77977 | 4.33563 | 4.65185 | 0.93261 | 0.7420631 | 5.6651  | pv | 0.9275789 | 3.779766 | py |
| PF14_0076 | PKH_133920 | PVX_086040 | PY06899 | PBANKA_103440 | PCHAS_103520 | 1.23193 | 1.00335 | 5.00051 | 3.08609 | 2.66648 | 2.0319  | 1.08098 | 0.7034595 | 5.00051 | pv | 0.6157786 | 3.086087 | py |
| PF14_0077 | PKH_133920 | PVX_086040 | PY06899 | PBANKA_103440 | PCHAS_103520 | 2.82572 | 1.00335 | 5.00051 | 3.08609 | 2.66648 | 2.0319  | 0.86843 | 0.575311  | 5.00051 | pv | 0.6142377 | 3.086087 | py |
| PF14_0079 | PKH_133910 | PVX_086035 | PY06900 | PBANKA_103430 | PCHAS_103510 | 1.66412 | 1.53312 | 0.01157 | 2.11181 | 0.42178 | 1.73397 | 0.59057 | 0.3781763 | 0.01157 | pv | 0.3607982 | 2.111808 | py |

|           |            |            |         |               |              |         |         |         |         |         |         |         |           |         |    |           |          |    |
|-----------|------------|------------|---------|---------------|--------------|---------|---------|---------|---------|---------|---------|---------|-----------|---------|----|-----------|----------|----|
| PF14_0081 | PKH_133900 | PVX_086025 | PY06657 | PBANKA_103410 | PCHAS_103490 | 3.35328 | 3.81767 | 5.27328 | 5.05524 | 2.69046 | 4.70247 | 0.8616  | 0.6315137 | 2.69046 | pb | 0.7893921 | 4.702468 | pc |
| PF14_0083 | PKH_133880 | PVX_086020 | PY01682 | PBANKA_103390 | PCHAS_103470 | 2.57022 | 0.71843 | 2.47368 | 2.56907 | 2.27691 | 2.40252 | 0.36919 | 0.0919737 | 0.71843 | pk | 0.1149671 | 2.473678 | pv |
| PF14_0086 | PKH_133860 | PVX_086005 | PY01376 | PBANKA_103360 | PCHAS_103440 | 1.86017 | 0.51359 | 1.17396 | 2.57594 | 5.04894 | 1.35802 | 0.89014 | 0.5497129 | 5.04894 | pb | 0.6871412 | 1.358023 | pc |
| PF14_0087 | PKH_133855 | PVX_086000 | PY01377 | PBANKA_103350 | PCHAS_103430 | 1.8736  | 1.2628  | 1.54248 | 2.49018 | 2.05921 | 1.66287 | 0.32581 | 0.2255049 | 2.49018 | py | 0.1827953 | 2.059209 | pb |
| PF14_0090 | PKH_133840 | PVX_085985 | PY06672 | PBANKA_103320 | PCHAS_103400 | 5.05407 | 5.65168 | 4.73222 | 3.65769 | 2.01441 | 3.88258 | 0.98055 | 0.6330971 | 2.01441 | pb | 0.5789621 | 3.882579 | pc |
| PF14_0097 | PKH_133780 | PVX_085955 | PY01816 | PBANKA_103260 | PCHAS_103340 | 3.32921 | 1.38204 | 6.08741 | 1.98028 | 0.64057 | 0.40199 | 0.97413 | 0.6312225 | 3.32921 | pf | 0.6036602 | 1.382042 | pk |
| PF14_0098 | PKH_133770 | PVX_085950 | PY01817 | PBANKA_103250 | PCHAS_103330 | 1.71669 | 3.52107 | 2.45478 | 3.20835 | 2.22969 | 2.4401  | 0.46629 | 0.34335   | 3.52107 | pk | 0.425518  | 2.454778 | pv |
| PF14_0100 | PKH_133750 | PVX_085940 | PY00624 | PBANKA_103230 | PCHAS_103310 | 2.02628 | 1.5292  | 1.80304 | 2.75104 | 1.18109 | 1.5909  | 0.37986 | 0.2238067 | 2.75104 | py | 0.177306  | 1.181091 | pb |
| PF14_0101 | PKH_133740 | PVX_085935 | PY00623 | PBANKA_103220 | PCHAS_103300 | 3.05517 | 3.18228 | 3.84665 | 2.45978 | 2.1327  | 2.18667 | 0.55083 | 0.3836169 | 3.84665 | pv | 0.4795212 | 2.459778 | py |
| PF14_0102 | PKH_133730 | PVX_085930 | PY00622 | PBANKA_103210 | PCHAS_103290 | 5.60107 | 5.95453 | 5.6583  | 4.96949 | 5.49265 | 5.28928 | 0.24375 | 0.1661812 | 4.96949 | py | 0.1806214 | 5.492651 | pb |
| PF14_0103 | PKH_133720 | PVX_085925 | PY00621 | PBANKA_103200 | PCHAS_103280 | 3.49665 | 3.50163 | 4.41078 | 0.21858 | 3.62218 | 3.0178  | 0.75311 | 0.3037028 | 0.21858 | py | 0.3494914 | 3.622183 | pb |
| PF14_0104 | PKH_133710 | PVX_085920 | PY04028 | PBANKA_103190 | PCHAS_103270 | 2.37869 | 3.00314 | 2.55639 | 2.25853 | 2.25274 | 1.77832 | 0.27477 | 0.1808052 | 3.00314 | pk | 0.1515393 | 2.556394 | pv |
| PF14_0105 | PKH_133700 | PVX_085915 | PY04029 | PBANKA_103180 | PCHAS_103260 | 4.70376 | 4.08495 | 4.22475 | 3.20281 | 3.3883  | 6.05929 | 0.71862 | 0.4674802 | 6.05929 | pc | 0.3638148 | 3.202811 | py |
| PF14_0107 | PKH_133680 | PVX_085905 | PY04031 | PBANKA_103160 | PCHAS_103240 | 6.17636 | 1.02508 | 4.1896  | 2.43564 | 0.84746 | 1.6746  | 1.08138 | 0.6739209 | 4.1896  | pv | 0.4897602 | 2.435639 | py |
| PF14_0110 | PKH_133640 | PVX_085890 | PY00165 | PBANKA_103130 | PCHAS_103210 | 0.24917 | 6.12502 | 6.26116 | 4.8799  | 6.01788 | 0.17143 | 0.37089 | 0.168816  | 4.8799  | py | 0.1501984 | 6.017876 | pb |
| PF14_0111 | PKH_133630 | PVX_085885 | PY00164 | PBANKA_103120 | PCHAS_103200 | 5.76614 | 0.45084 | 3.37108 | 2.16118 | 2.19961 | 2.13212 | 0.94433 | 0.5975475 | 5.76614 | pf | 0.3193487 | 0.450836 | pk |
| PF14_0112 | PKH_133620 | PVX_085880 | PY00163 | PBANKA_103110 | PCHAS_103190 | 3.79393 | 2.75574 | 3.30129 | 2.56552 | 1.7287  | 3.19711 | 0.5404  | 0.3547933 | 1.7287  | pb | 0.4434917 | 3.197108 | pc |
| PF14_0114 | PKH_133600 | PVX_085875 | PY00161 | PBANKA_103090 | PCHAS_103170 | 3.58345 | 4.1083  | 3.81258 | 2.55157 | 3.40045 | 2.38789 | 0.5274  | 0.3937726 | 2.38789 | pc | 0.2342455 | 2.55157  | py |
| PF14_0115 | PKH_133590 | PVX_085870 | PY00160 | PBANKA_103080 | PCHAS_103160 | 2.62494 | 3.6381  | 1.93397 | 1.62248 | 1.41824 | 0.06581 | 0.84841 | 0.644464  | 0.06581 | pc | 0.3795478 | 3.638101 | pk |
| PF14_0120 | PKH_133550 | PVX_085850 | PY00426 | PBANKA_103050 | PCHAS_103130 | 4.35016 | 4.93223 | 4.01643 | 5.58166 | 4.05782 | 3.07334 | 0.61941 | 0.4879298 | 3.07334 | pc | 0.3020386 | 5.581658 | py |
| PF14_0124 | PKH_133510 | PVX_085830 | PY01545 | PBANKA_103010 | PCHAS_103090 | 1.8292  | 2.6163  | 1.46121 | 1.52826 | 1.01557 | 6.19933 | 0.5968  | 0.3937436 | 6.19933 | pc | 0.2201679 | 2.616303 | pk |
| PF14_0125 | PKH_133500 | PVX_085825 | PY01546 | PBANKA_103000 | PCHAS_103080 | 1.84639 | 1.87671 | 2.2934  | 2.30152 | 2.22    | 1.59171 | 0.25002 | 0.174363  | 1.59171 | pc | 0.1975745 | 2.301518 | py |



|           |            |            |         |                   |                  |         |         |         |         |         |         |         |           |         |    |           |          |    |
|-----------|------------|------------|---------|-------------------|------------------|---------|---------|---------|---------|---------|---------|---------|-----------|---------|----|-----------|----------|----|
| PF14_0126 | PKH_133490 | PVX_085820 | PY01547 | PBANKA_102<br>990 | PCHAS_10307<br>0 | 2.60807 | 2.28103 | 2.47948 | 2.6198  | 2.32813 | 2.44462 | 0.10893 | 0.0910244 | 2.28103 | pk | 0.1137806 | 2.479479 | pv |
| PF14_0127 | PKH_133480 | PVX_085815 | PY01548 | PBANKA_102<br>980 | PCHAS_10306<br>0 | 1.02585 | 3.03905 | 2.31568 | 3.86907 | 3.0849  | 2.57813 | 0.67889 | 0.4120313 | 1.02585 | pf | 0.5150391 | 3.039054 | pk |
| PF14_0135 | PKH_133390 | PVX_085765 | PY01402 | PBANKA_102<br>900 | PCHAS_10298<br>0 | 5.96702 | 0.01767 | 0.2489  | 1.50882 | 6.10669 | 5.66277 | 0.48141 | 0.2406285 | 1.50882 | py | 0.3007856 | 6.106693 | pb |
| PF14_0136 | PKH_133380 | PVX_085760 | PY01400 | PBANKA_102<br>890 | PCHAS_10297<br>0 | 1.25262 | 0.96139 | 1.50751 | 2.56997 | 3.10084 | 3.33999 | 0.88155 | 0.6913615 | 3.33999 | pc | 0.7276717 | 0.961389 | pk |
| PF14_0137 | PKH_133370 | PVX_085755 | PY05607 | PBANKA_102<br>880 | PCHAS_10296<br>0 | 1.80029 | 4.5478  | 3.56106 | 1.55069 | 2.9302  | 4.57566 | 1.06722 | 0.8785953 | 1.55069 | py | 0.9405287 | 2.930195 | pb |
| PF14_0138 | PKH_133360 | PVX_085750 | PY05608 | PBANKA_102<br>870 | PCHAS_10295<br>0 | 4.61618 | 4.67894 | 3.43066 | 4.48488 | 4.86837 | 4.72528 | 0.29015 | 0.0985193 | 3.43066 | pv | 0.0746346 | 4.484883 | py |
| PF14_0141 | PKH_133290 | PVX_085735 | PY07431 | PBANKA_102<br>840 | PCHAS_10292<br>0 | 2.34708 | 2.00117 | 2.97656 | 1.99528 | 3.08913 | 2.95969 | 0.44698 | 0.3434883 | 1.99528 | py | 0.3969989 | 3.089132 | pb |
| PF14_0142 | PKH_133280 | PVX_085730 | PY07156 | PBANKA_102<br>830 | PCHAS_10291<br>0 | 4.6666  | 3.95054 | 2.48613 | 5.25206 | 2.02268 | 4.82675 | 1.04768 | 0.7284271 | 2.02268 | pb | 0.8704971 | 4.826745 | pc |
| PF14_0145 | PKH_133250 | PVX_085715 | PY05772 | PBANKA_102<br>800 | PCHAS_10288<br>0 | 1.58348 | 0.64741 | 2.33833 | 0.26925 | 0.71181 | 1.17055 | 0.57731 | 0.3674747 | 2.33833 | pv | 0.3487027 | 0.269251 | py |
| PF14_0146 | PKH_133240 | PVX_085710 | PY06406 | PBANKA_102<br>790 | PCHAS_10287<br>0 | 2.29659 | 2.85742 | 2.40755 | 3.24227 | 3.10787 | 3.49743 | 0.381   | 0.2949455 | 2.29659 | pf | 0.3060706 | 2.857421 | pk |
| PF14_0149 | PKH_133210 | PVX_085695 | PY04456 | PBANKA_102<br>760 | PCHAS_10284<br>0 | 5.636   | 5.85843 | 6.14958 | 4.81336 | 5.2452  | 3.32132 | 0.71069 | 0.3898897 | 3.32132 | pc | 0.3589676 | 6.149579 | pv |
| PF14_0150 | PKH_133200 | PVX_085690 | PY04455 | PBANKA_102<br>750 | PCHAS_10283<br>0 | 1.3112  | 1.90008 | 1.81851 | 1.02494 | 1.33158 | 1.64194 | 0.28213 | 0.2151632 | 1.02494 | py | 0.1913635 | 1.331575 | pb |
| PF14_0152 | PKH_133180 | PVX_085680 | PY00348 | PBANKA_102<br>730 | PCHAS_10281<br>0 | 3.20599 | 4.26978 | 4.12608 | 5.45073 | 4.92095 | 2.59946 | 0.78499 | 0.6079215 | 2.59946 | pc | 0.4646646 | 5.450726 | py |
| PF14_0154 | PKH_133160 | PVX_085670 | PY00386 | PBANKA_102<br>710 | PCHAS_10279<br>0 | 3.19469 | 0.3218  | 1.12308 | 4.10629 | 4.88686 | 5.23831 | 1.17695 | 0.908463  | 1.12308 | pv | 0.9404356 | 4.106286 | py |
| PF14_0156 | PKH_133140 | PVX_085660 | PY06971 | PBANKA_102<br>690 | PCHAS_10277<br>0 | 1.83166 | 0.78043 | 2.23632 | 1.59945 | 1.00363 | 1.06129 | 0.47035 | 0.3294095 | 2.23632 | pv | 0.2772222 | 1.599449 | py |
| PF14_0157 | PKH_133130 | PVX_085655 | PY06970 | PBANKA_102<br>680 | PCHAS_10276<br>0 | 1.59979 | 3.10441 | 2.52541 | 2.80876 | 5.1667  | 4.92242 | 1.04326 | 0.7803231 | 5.1667  | pb | 0.4469907 | 4.922417 | pc |
| PF14_0160 | PKH_133100 | PVX_085640 | PY04718 | PBANKA_102<br>650 | PCHAS_10273<br>0 | 5.29021 | 4.65246 | 4.8578  | 5.50146 | 1.46605 | 5.38436 | 0.6391  | 0.2751132 | 1.46605 | pb | 0.3203543 | 5.384361 | pc |
| PF14_0161 | PKH_133090 | PVX_085635 | PY06610 | PBANKA_102<br>640 | PCHAS_10272<br>0 | 3.57237 | 2.6511  | 0.31592 | 4.88251 | 0.98001 | 4.76769 | 1.29228 | 1.0516288 | 0.98001 | pb | 1.314536  | 4.767689 | pc |
| PF14_0162 | PKH_133080 | PVX_085630 | PY06609 | PBANKA_102<br>630 | PCHAS_10271<br>0 | 1.09912 | 3.36588 | 0.21317 | 0.49666 | 6.20978 | 1.87117 | 0.94996 | 0.5661059 | 3.36588 | pk | 0.6367585 | 0.213169 | pv |
| PF14_0171 | PKH_133050 | PVX_085585 | PY03056 | PBANKA_102<br>540 | PCHAS_10262<br>0 | 5.4733  | 5.67071 | 6.10859 | 4.75693 | 5.47337 | 5.39764 | 0.2708  | 0.1816722 | 4.75693 | py | 0.2270902 | 5.473374 | pb |
| PF14_0174 | PKH_133030 | PVX_085575 | PY05447 | PBANKA_102<br>520 | PCHAS_10260<br>0 | 1.83464 | 1.74415 | 1.58163 | 2.0162  | 1.22907 | 1.25715 | 0.25453 | 0.2185164 | 2.0162  | py | 0.1850039 | 1.229065 | pb |
| PF14_0184 | PKH_133000 | PVX_085530 | PY02577 | PBANKA_102<br>420 | PCHAS_10250<br>0 | 4.37821 | 5.2071  | 4.75453 | 2.49037 | 5.03226 | 4.59713 | 0.58803 | 0.2528031 | 2.49037 | py | 0.2465712 | 5.032258 | pb |

|            |            |            |         |                   |                  |         |         |         |         |         |         |         |           |         |    |           |          |    |
|------------|------------|------------|---------|-------------------|------------------|---------|---------|---------|---------|---------|---------|---------|-----------|---------|----|-----------|----------|----|
| PF14_0186  | PKH_132980 | PVX_085520 | PY03574 | PBANKA_102<br>400 | PCHAS_10248<br>0 | 3.43726 | 2.19206 | 2.33438 | 2.77525 | 3.5392  | 4.07104 | 0.6243  | 0.4900034 | 4.07104 | pc | 0.466708  | 2.19206  | pk |
| PF14_0188  | PKH_132960 | PVX_085510 | PY05087 | PBANKA_102<br>380 | PCHAS_10246<br>0 | 1.76216 | 1.71743 | 1.75557 | 1.38142 | 0.73917 | 1.64459 | 0.245   | 0.0983442 | 0.73917 | pb | 0.1047197 | 1.644585 | pc |
| PF14_0193  | PKH_132910 | PVX_085485 | PY01203 | PBANKA_102<br>330 | PCHAS_10241<br>0 | 1.29616 | 1.44236 | 3.01031 | 0.08078 | 2.98388 | 1.86967 | 0.84076 | 0.6511338 | 0.08078 | py | 0.5353653 | 2.983876 | pb |
| PF14_0194  | PKH_132900 | PVX_085480 | PY01202 | PBANKA_102<br>320 | PCHAS_10240<br>0 | 1.8367  | 4.27184 | 2.3595  | 3.43943 | 2.45275 | 4.81683 | 0.97986 | 0.7030142 | 4.81683 | pc | 0.7247542 | 1.836698 | pf |
| PF14_0195  | PKH_132890 | PVX_085475 | PY01201 | PBANKA_102<br>310 | PCHAS_10239<br>0 | 0.90732 | 0.44251 | 0.25263 | 5.08227 | 3.16287 | 5.24873 | 1.08257 | 0.717041  | 3.16287 | pb | 0.574529  | 5.24873  | pc |
| PF14_0196  | PKH_132880 | PVX_085470 | PY01200 | PBANKA_102<br>300 | PCHAS_10238<br>0 | 5.67465 | 6.2135  | 4.59971 | 3.31067 | 4.24469 | 0.93683 | 1.15885 | 0.8665581 | 0.93683 | pc | 0.7609377 | 3.31067  | py |
| PF14_0197  | PKH_132870 | PVX_085465 | PY01199 | PBANKA_102<br>290 | PCHAS_10237<br>0 | 0.75171 | 0.49414 | 5.63308 | 2.48847 | 3.88184 | 0.29056 | 1.08254 | 0.7199461 | 3.88184 | pb | 0.8490354 | 0.290555 | pc |
| PF14_0198  | PKH_132860 | PVX_085460 | PY01198 | PBANKA_102<br>280 | PCHAS_10236<br>0 | 2.28982 | 1.62251 | 2.68433 | 2.13607 | 2.38453 | 1.21759 | 0.39709 | 0.2620563 | 1.21759 | pc | 0.2289444 | 2.684326 | pv |
| PF14_0199  | PKH_132850 | PVX_085455 | PY01197 | PBANKA_102<br>270 | PCHAS_10235<br>0 | 5.47721 | 0.9361  | 2.53718 | 5.18812 | 2.65125 | 0.67935 | 1.22437 | 1.1208285 | 5.47721 | pf | 1.1557087 | 0.9361   | pk |
| PF14_0200  | PKH_132840 | PVX_085450 | PY06793 | PBANKA_102<br>260 | PCHAS_10234<br>0 | 3.18692 | 2.51101 | 4.14675 | 5.73402 | 6.18297 | 2.25768 | 1.35136 | 1.0352406 | 5.73402 | py | 0.6412448 | 6.182967 | pb |
| PF14_0209  | PKH_132740 | PVX_085395 | PY07260 | PBANKA_102<br>170 | PCHAS_10225<br>0 | 2.34134 | 0.75608 | 2.2762  | 3.01279 | 2.81632 | 1.89539 | 0.54046 | 0.3315028 | 0.75608 | pk | 0.3980922 | 2.276197 | pv |
| PF14_0212  | PKH_132700 | PVX_085375 | PY04493 | PBANKA_102<br>130 | PCHAS_10221<br>0 | 4.95927 | 0.33262 | 2.70093 | 1.99413 | 3.59414 | 2.33581 | 1.09863 | 0.7936638 | 4.95927 | pf | 0.4912824 | 0.332624 | pk |
| PF14_0213  | PKH_132690 | PVX_085370 | PY00028 | PBANKA_102<br>120 | PCHAS_10220<br>0 | 5.6444  | 5.9133  | 5.9448  | 5.21597 | 6.04283 | 5.58379 | 0.24279 | 0.1518862 | 5.21597 | py | 0.1574764 | 6.042826 | pb |
| PF14_0213a | PKH_132680 | PVX_085365 | PY00027 | PBANKA_102<br>110 | PCHAS_10219<br>0 | 1.99433 | 2.18271 | 2.05057 | 5.55561 | 6.0662  | 1.08122 | 1.01516 | 0.6738083 | 5.55561 | py | 0.2894326 | 6.066202 | pb |
| PF14_0214  | PKH_132670 | PVX_085360 | PY00026 | PBANKA_102<br>100 | PCHAS_10218<br>0 | 1.6046  | 2.3161  | 1.99167 | 1.72851 | 1.60069 | 1.36407 | 0.24449 | 0.1510836 | 2.3161  | pk | 0.0920875 | 1.99167  | pv |
| PF14_0215  | PKH_132660 | PVX_085355 | PY00025 | PBANKA_102<br>090 | PCHAS_10217<br>0 | 4.92323 | 5.5291  | 5.28132 | 3.96814 | 3.11527 | 4.2367  | 0.73559 | 0.5211167 | 3.11527 | pb | 0.4797641 | 4.236698 | pc |
| PF14_0216  | PKH_132650 | PVX_085350 | PY00024 | PBANKA_102<br>080 | PCHAS_10216<br>0 | 4.55426 | 5.24208 | 5.15828 | 6.04997 | 0.90658 | 5.19957 | 0.59495 | 0.3159024 | 0.90658 | pb | 0.394878  | 5.19957  | pc |
| PF14_0217  | PKH_132640 | PVX_085345 | PY00022 | PBANKA_102<br>070 | PCHAS_10215<br>0 | 2.19507 | 2.48746 | 2.52738 | 1.4063  | 2.57292 | 1.94609 | 0.34005 | 0.1918269 | 1.4063  | py | 0.2184175 | 2.57292  | pb |
| PF14_0218  | PKH_132630 | PVX_085340 | PY00021 | PBANKA_102<br>060 | PCHAS_10214<br>0 | 2.40095 | 3.70911 | 3.01672 | 4.15624 | 3.1791  | 2.51078 | 0.51933 | 0.3952942 | 4.15624 | py | 0.4535221 | 3.179103 | pb |
| PF14_0220  | PKH_132620 | PVX_085335 | PY00020 | PBANKA_102<br>050 | PCHAS_10213<br>0 | 0.47302 | 1.64971 | 0.31388 | 3.4143  | 0.59323 | 4.41593 | 1.12293 | 0.7592636 | 3.4143  | py | 0.9190261 | 0.59323  | pb |
| PF14_0221  | PKH_132610 | PVX_085330 | PY00019 | PBANKA_102<br>040 | PCHAS_10212<br>0 | 1.61453 | 1.52187 | 2.44398 | 0.00126 | 0.82339 | 0.88315 | 0.64543 | 0.462351  | 2.44398 | pv | 0.3574652 | 0.001257 | py |
| PF14_0223  | PKH_132590 | PVX_085320 | PY00017 | PBANKA_102<br>020 | PCHAS_10210<br>0 | 2.34335 | 2.71459 | 3.07712 | 1.5627  | 3.48905 | 1.8586  | 0.58602 | 0.4740816 | 3.48905 | pb | 0.4714153 | 1.858598 | pc |



|             |            |            |         |                   |                  |         |         |         |         |         |         |         |           |         |    |           |          |    |
|-------------|------------|------------|---------|-------------------|------------------|---------|---------|---------|---------|---------|---------|---------|-----------|---------|----|-----------|----------|----|
| PF14_0227   | PKH_132550 | PVX_085300 | PY07390 | PBANKA_101<br>980 | PCHAS_10206<br>0 | 3.0997  | 1.58034 | 0.8257  | 5.77413 | 5.51304 | 5.07747 | 1.17606 | 0.8763808 | 3.0997  | pf | 0.5731278 | 1.58034  | pk |
| PF14_0230   | PKH_132520 | PVX_085275 | PY06459 | PBANKA_101<br>950 | PCHAS_10203<br>0 | 2.33903 | 2.48999 | 2.63443 | 2.81782 | 2.30715 | 2.77493 | 0.18183 | 0.1526363 | 2.81782 | py | 0.1450853 | 2.30715  | pb |
| PF14_0231   | PKH_132510 | PVX_085270 | PY06460 | PBANKA_101<br>940 | PCHAS_10202<br>0 | 2.42245 | 1.3872  | 2.55129 | 2.3058  | 2.94519 | 1.73287 | 0.41551 | 0.2915619 | 1.3872  | pk | 0.3322436 | 2.55129  | pv |
| PF14_0232   | PKH_132500 | PVX_085265 | PY06826 | PBANKA_101<br>930 | PCHAS_10201<br>0 | 3.32703 | 2.7363  | 4.02519 | 5.62279 | 2.81743 | 5.12029 | 0.98125 | 0.7183509 | 5.62279 | py | 0.7705371 | 2.817426 | pb |
| PF14_0233   | PKH_132490 | PVX_085260 | PY06825 | PBANKA_101<br>920 | PCHAS_10200<br>0 | 5.35641 | 3.44171 | 3.72599 | 5.34332 | 4.44646 | 1.12507 | 1.0823  | 0.706405  | 1.12507 | pc | 0.6318174 | 3.441706 | pk |
| PF14_0234   | PKH_132480 | PVX_085255 | PY06824 | PBANKA_101<br>910 | PCHAS_10199<br>0 | 5.85476 | 0.42198 | 5.04399 | 2.94555 | 4.80249 | 5.12442 | 0.81538 | 0.5426886 | 2.94555 | py | 0.5978798 | 4.802491 | pb |
| PF14_0239   | PKH_132440 | PVX_085230 | PY06635 | PBANKA_101<br>870 | PCHAS_10195<br>0 | 1.64466 | 1.5441  | 2.58151 | 1.0052  | 2.74252 | 5.89645 | 0.80102 | 0.5549456 | 5.89645 | pc | 0.4192182 | 2.742515 | pb |
| PF14_0240   | PKH_132430 | PVX_085225 | PY05142 | PBANKA_101<br>860 | PCHAS_10194<br>0 | 2.26286 | 2.14525 | 2.82673 | 2.6189  | 2.07351 | 1.77679 | 0.28549 | 0.2062932 | 2.82673 | pv | 0.1394532 | 2.618903 | py |
| PF14_0241   | PKH_132420 | PVX_085220 | PY05141 | PBANKA_101<br>850 | PCHAS_10193<br>0 | 2.25436 | 2.52426 | 2.43669 | 2.4686  | 3.06277 | 1.96422 | 0.23339 | 0.1548566 | 3.06277 | pb | 0.0754535 | 1.964218 | pc |
| PF14_0242   | PKH_132410 | PVX_085215 | PY05140 | PBANKA_101<br>840 | PCHAS_10192<br>0 | 2.54722 | 0.55194 | 2.47042 | 1.06004 | 3.17519 | 1.9497  | 0.77186 | 0.5425316 | 0.55194 | pk | 0.6781644 | 2.470417 | pv |
| PF14_0246   | PKH_132370 | PVX_085200 | PY00206 | PBANKA_101<br>790 | PCHAS_10187<br>0 | 5.60181 | 5.01868 | 3.71657 | 0.33293 | 0.98829 | 2.20758 | 1.34022 | 1.0283516 | 3.71657 | pv | 1.2854394 | 0.332925 | py |
| PF14_0247   | PKH_132360 | PVX_085195 | PY01065 | PBANKA_101<br>780 | PCHAS_10186<br>0 | 1.4892  | 0.2038  | 2.82848 | 6.22348 | 2.3031  | 2.36053 | 0.97647 | 0.6992017 | 6.22348 | py | 0.8740021 | 2.303101 | pb |
| PF14_0248   | PKH_132350 | PVX_085190 | PY01064 | PBANKA_101<br>770 | PCHAS_10185<br>0 | 4.75403 | 6.13561 | 3.7492  | 4.80954 | 4.28968 | 4.65609 | 0.5007  | 0.3049378 | 6.13561 | pk | 0.1544508 | 3.749203 | pv |
| PF14_0251   | PKH_132320 | PVX_085175 | PY07136 | PBANKA_101<br>740 | PCHAS_10182<br>0 | 5.85991 | 4.61283 | 3.66695 | 4.74775 | 5.46663 | 4.96823 | 0.54454 | 0.3931895 | 3.66695 | pv | 0.4363679 | 4.747752 | py |
| PF14_0253-a | PKH_132300 | PVX_085165 | PY02120 | PBANKA_101<br>720 | PCHAS_10180<br>0 | 3.72141 | 5.73187 | 2.91171 | 5.88712 | 4.11747 | 4.83775 | 0.95102 | 0.7560207 | 2.91171 | pv | 0.6826829 | 5.887118 | py |
| PF14_0256   | PKH_132270 | PVX_085150 | PY07159 | PBANKA_101<br>680 | PCHAS_10176<br>0 | 2.0762  | 3.24046 | 2.23417 | 2.58512 | 2.92729 | 3.80785 | 0.51335 | 0.3714774 | 3.80785 | pc | 0.3371166 | 2.076198 | pf |
| PF14_0257   | PKH_132260 | PVX_085145 | PY06840 | PBANKA_101<br>670 | PCHAS_10175<br>0 | 3.72266 | 3.47039 | 3.44482 | 3.07321 | 4.05291 | 3.54438 | 0.22192 | 0.1498006 | 4.05291 | pb | 0.1687547 | 3.544377 | pc |
| PF14_0264   | PKH_113740 | PVX_085120 | PY04471 | PBANKA_101<br>620 | PCHAS_10170<br>0 | 0.65446 | 4.42355 | 5.2314  | 6.11794 | 3.98436 | 2.64421 | 1.20581 | 0.9295357 | 2.64421 | pc | 0.735358  | 0.654464 | pf |
| PF14_0266   | PKH_132160 | PVX_085110 | PY04472 | PBANKA_101<br>600 | PCHAS_10168<br>0 | 2.89149 | 2.71338 | 2.75162 | 6.20099 | 0.03611 | 0.07903 | 1.38726 | 1.1022163 | 2.89149 | pf | 0.7191824 | 2.713384 | pk |
| PF14_0267   | PKH_132150 | PVX_085105 | PY00685 | PBANKA_101<br>590 | PCHAS_10167<br>0 | 2.53309 | 4.03054 | 3.58382 | 3.83928 | 4.21994 | 4.6239  | 0.48637 | 0.2841476 | 2.53309 | pf | 0.3551845 | 4.030541 | pk |
| PF14_0268   | PKH_132140 | PVX_085100 | PY00686 | PBANKA_101<br>580 | PCHAS_10166<br>0 | 4.07142 | 4.0606  | 3.54137 | 5.52783 | 4.30645 | 4.73558 | 0.48274 | 0.2880122 | 5.52783 | py | 0.3012578 | 4.306453 | pb |
| PF14_0269   | PKH_132130 | PVX_085095 | PY00687 | PBANKA_101<br>570 | PCHAS_10165<br>0 | 2.0296  | 3.52354 | 4.80775 | 2.43951 | 2.19867 | 1.37996 | 0.86043 | 0.5106984 | 4.80775 | pv | 0.5781634 | 2.439508 | py |

|           |            |            |         |                   |                  |         |         |         |         |         |         |         |           |         |    |           |          |    |
|-----------|------------|------------|---------|-------------------|------------------|---------|---------|---------|---------|---------|---------|---------|-----------|---------|----|-----------|----------|----|
| PF14_0271 | PKH_132110 | PVX_085085 | PY00689 | PBANKA_101<br>550 | PCHAS_10163<br>0 | 0.9939  | 0.11058 | 5.90515 | 6.0409  | 4.68957 | 3.23975 | 0.97955 | 0.615227  | 3.23975 | pc | 0.4599855 | 0.993903 | pf |
| PF14_0273 | PKH_132090 | PVX_085070 | PY00691 | PBANKA_101<br>530 | PCHAS_10161<br>0 | 2.08285 | 2.23192 | 3.21564 | 1.45044 | 4.30782 | 2.63711 | 0.73256 | 0.4638906 | 4.30782 | pb | 0.4785662 | 2.637107 | pc |
| PF14_0274 | PKH_132080 | PVX_085065 | PY06443 | PBANKA_101<br>520 | PCHAS_10160<br>0 | 1.53516 | 0.62102 | 2.54415 | 2.23781 | 4.05111 | 0.68633 | 0.99843 | 0.6949216 | 4.05111 | pb | 0.6564448 | 0.686329 | pc |
| PF14_0277 | PKH_132050 | PVX_085050 | PY01272 | PBANKA_101<br>490 | PCHAS_10157<br>0 | 6.27081 | 5.90792 | 3.43154 | 3.23781 | 2.75425 | 2.91344 | 1.11746 | 0.7343553 | 6.27081 | pf | 0.250416  | 5.907923 | pk |
| PF14_0280 | PKH_132020 | PVX_085035 | PY01269 | PBANKA_101<br>460 | PCHAS_10154<br>0 | 3.71212 | 5.93214 | 2.37223 | 5.88198 | 4.0839  | 2.45821 | 1.22591 | 1.0270888 | 5.93214 | pk | 0.9488882 | 2.372226 | pv |
| PF14_0281 | PKH_132010 | PVX_085030 | PY01268 | PBANKA_101<br>450 | PCHAS_10153<br>0 | 5.77303 | 5.91468 | 5.72785 | 6.1652  | 5.54937 | 5.44567 | 0.18834 | 0.138534  | 6.1652  | py | 0.1285495 | 5.549374 | pb |
| PF14_0282 | PKH_132000 | PVX_085025 | PY01267 | PBANKA_101<br>440 | PCHAS_10152<br>0 | 2.29868 | 0.18738 | 2.48738 | 0.91954 | 3.10854 | 2.09227 | 0.78257 | 0.5168229 | 0.18738 | pk | 0.5988525 | 2.48738  | pv |
| PF14_0290 | PKH_131920 | PVX_084985 | PY01259 | PBANKA_101<br>360 | PCHAS_10144<br>0 | 0.59997 | 2.79257 | 0.075   | 4.4673  | 4.99783 | 2.7041  | 1.3792  | 1.1718688 | 0.59997 | pf | 1.0461532 | 2.792567 | pk |
| PF14_0292 | PKH_131900 | PVX_084975 | PY06180 | PBANKA_101<br>350 | PCHAS_10143<br>0 | 1.46143 | 1.94361 | 5.43912 | 1.43252 | 1.295   | 1.4144  | 0.49537 | 0.1391256 | 5.43912 | pv | 0.173907  | 1.432524 | py |
| PF14_0293 | PKH_131890 | PVX_084970 | PY06181 | PBANKA_101<br>340 | PCHAS_10142<br>0 | 5.81958 | 5.77406 | 5.58199 | 6.21177 | 5.92945 | 5.54032 | 0.1774  | 0.1253428 | 6.21177 | py | 0.1178324 | 5.929446 | pb |
| PF14_0294 | PKH_131880 | PVX_084965 | PY02176 | PBANKA_101<br>330 | PCHAS_10141<br>0 | 4.17252 | 4.71179 | 3.24766 | 3.23275 | 5.36112 | 3.9875  | 0.62959 | 0.480779  | 5.36112 | pb | 0.6009737 | 3.987498 | pc |
| PF14_0295 | PKH_131870 | PVX_084960 | PY02175 | PBANKA_101<br>320 | PCHAS_10140<br>0 | 4.50891 | 5.82583 | 5.07775 | 3.96427 | 3.65142 | 4.50351 | 0.54888 | 0.3941935 | 5.82583 | pk | 0.3491834 | 5.077749 | pv |
| PF14_0296 | PKH_131860 | PVX_084955 | PY02173 | PBANKA_101<br>310 | PCHAS_10139<br>0 | 2.28244 | 2.18936 | 2.60473 | 2.30804 | 2.74325 | 1.81215 | 0.22868 | 0.1752353 | 1.81215 | pc | 0.110242  | 2.743246 | pb |
| PF14_0300 | PKH_131840 | PVX_084945 | PY04059 | PBANKA_101<br>290 | PCHAS_10137<br>0 | 3.59453 | 3.60933 | 3.35808 | 2.76123 | 3.33537 | 2.69969 | 0.29428 | 0.2214539 | 2.69969 | pc | 0.1276047 | 2.761227 | py |
| PF14_0304 | PKH_041750 | PVX_084930 | PY04054 | PBANKA_101<br>260 | PCHAS_10134<br>0 | 5.82324 | 0.13449 | 3.43932 | 4.34815 | 3.31494 | 2.74491 | 1.18165 | 0.8223057 | 0.13449 | pk | 1.0278821 | 3.439318 | pv |
| PF14_0307 | PKH_131680 | PVX_084920 | PY04902 | PBANKA_101<br>240 | PCHAS_10132<br>0 | 1.5913  | 6.1826  | 1.55721 | 2.15317 | 0.15842 | 2.12456 | 0.709   | 0.5124203 | 6.1826  | pk | 0.6320017 | 1.557206 | pv |
| PF14_0311 | PKH_131640 | PVX_084900 | PY05014 | PBANKA_101<br>200 | PCHAS_10128<br>0 | 5.3803  | 0.08489 | 5.82101 | 5.53529 | 5.48215 | 5.55805 | 0.2249  | 0.1033213 | 0.08489 | pk | 0.0577234 | 5.821008 | pv |
| PF14_0312 | PKH_131620 | PVX_084885 | PY05262 | PBANKA_101<br>180 | PCHAS_10126<br>0 | 3.13288 | 1.17471 | 2.90877 | 5.6443  | 5.2556  | 3.14936 | 1.13882 | 0.8642955 | 5.6443  | py | 0.5496874 | 5.255604 | pb |
| PF14_0314 | PKH_131600 | PVX_084870 | PY05679 | PBANKA_101<br>160 | PCHAS_10124<br>0 | 5.12621 | 4.8378  | 4.51155 | 2.72403 | 1.01168 | 4.88377 | 0.87191 | 0.5548811 | 1.01168 | pb | 0.6821087 | 4.883773 | pc |
| PF14_0315 | PKH_131590 | PVX_084865 | PY05680 | PBANKA_101<br>150 | PCHAS_10123<br>0 | 3.9529  | 0.17448 | 4.47576 | 4.32033 | 4.79649 | 5.05135 | 0.59275 | 0.3149215 | 0.17448 | pk | 0.3936518 | 4.475761 | pv |
| PF14_0321 | PKH_131530 | PVX_084835 | PY06911 | PBANKA_101<br>080 | PCHAS_10117<br>0 | 2.03975 | 0.15059 | 2.03985 | 2.64384 | 2.74385 | 2.25974 | 0.56954 | 0.2616199 | 0.15059 | pk | 0.2720524 | 2.039852 | pv |
| PF14_0322 | PKH_131520 | PVX_084830 | PY06909 | PBANKA_101<br>070 | PCHAS_10116<br>0 | 1.97672 | 0.90595 | 2.93802 | 1.65368 | 2.6365  | 1.1083  | 0.64722 | 0.519795  | 2.93802 | pv | 0.6497437 | 1.653679 | py |

|            |            |            |         |               |              |         |         |         |         |         |         |         |           |         |    |           |          |    |
|------------|------------|------------|---------|---------------|--------------|---------|---------|---------|---------|---------|---------|---------|-----------|---------|----|-----------|----------|----|
| PF14_0323  | PKH_131510 | PVX_084825 | PY06908 | PBANKA_101060 | PCHAS_101150 | 4.37559 | 4.80163 | 4.98763 | 4.4414  | 3.85495 | 4.41274 | 0.26456 | 0.2001868 | 3.85495 | pb | 0.2430669 | 4.412735 | pc |
| PF14_0324  | PKH_131500 | PVX_084820 | PY03138 | PBANKA_101050 | PCHAS_101140 | 2.51422 | 2.76822 | 2.30872 | 2.34723 | 2.11511 | 2.65809 | 0.19491 | 0.1540726 | 2.11511 | pb | 0.1566229 | 2.658091 | pc |
| PF14_0325  | PKH_131490 | PVX_084815 | PY03139 | PBANKA_101040 | PCHAS_101130 | 5.94405 | 1.28933 | 5.40402 | 5.44626 | 5.62604 | 5.62567 | 0.44444 | 0.1439635 | 1.28933 | pk | 0.1245412 | 5.404019 | pv |
| PF14_0327  | PKH_131470 | PVX_084805 | PY02559 | PBANKA_101020 | PCHAS_101110 | 1.52527 | 1.68993 | 2.42924 | 3.62142 | 0.62621 | 1.90338 | 0.68544 | 0.4362272 | 3.62142 | py | 0.2793532 | 0.626208 | pb |
| PF14_0328  | PKH_131460 | PVX_084800 | PY02558 | PBANKA_101010 | PCHAS_101100 | 2.7224  | 2.51638 | 1.96793 | 2.31899 | 1.94609 | 3.57369 | 0.42991 | 0.2649529 | 3.57369 | pc | 0.2379654 | 1.946085 | pb |
| PF14_0329  | PKH_131450 | PVX_084795 | PY02557 | PBANKA_101000 | PCHAS_101090 | 3.14389 | 2.80822 | 2.42994 | 1.92878 | 2.81577 | 2.58058 | 0.30476 | 0.1898286 | 1.92878 | py | 0.2353988 | 2.815768 | pb |
| PF14_0331  | PKH_131430 | PVX_084785 | PY02555 | PBANKA_100980 | PCHAS_101070 | 4.2082  | 2.46368 | 2.6998  | 4.98686 | 2.99587 | 2.53886 | 0.7481  | 0.4403056 | 4.98686 | py | 0.476366  | 2.995868 | pb |
| PF14_0332  | PKH_131420 | PVX_084780 | PY02554 | PBANKA_100970 | PCHAS_101060 | 3.83544 | 3.77233 | 5.44823 | 4.86773 | 3.48234 | 4.3003  | 0.58769 | 0.3826729 | 5.44823 | pv | 0.2202667 | 4.867734 | py |
| PF14_0334  | PKH_131400 | PVX_084770 | PY03719 | PBANKA_100950 | PCHAS_101040 | 5.68711 | 5.626   | 0.83162 | 4.2504  | 0.33226 | 0.18363 | 0.77226 | 0.4834265 | 4.2504  | py | 0.5671264 | 0.332256 | pb |
| PF14_0337  | PKH_131370 | PVX_084755 | PY05582 | PBANKA_100920 | PCHAS_101010 | 5.80829 | 6.05377 | 6.09138 | 0.28389 | 5.72524 | 6.21955 | 0.21512 | 0.1554792 | 0.28389 | py | 0.1122172 | 5.725241 | pb |
| PF14_0339  | PKH_131350 | PVX_084745 | PY00616 | PBANKA_100900 | PCHAS_100990 | 3.21986 | 2.87391 | 2.66989 | 3.89332 | 3.01931 | 2.10149 | 0.41453 | 0.2935576 | 3.89332 | py | 0.3305969 | 3.019306 | pb |
| PF14_0340  | PKH_131340 | PVX_084740 | PY00617 | PBANKA_100890 | PCHAS_100980 | 3.28821 | 2.9322  | 4.03866 | 3.59729 | 3.42321 | 2.17354 | 0.4442  | 0.2831065 | 2.17354 | pc | 0.2000212 | 4.038659 | pv |
| PF14_0341  | PKH_131330 | PVX_084735 | PY00618 | PBANKA_100880 | PCHAS_100970 | 2.4784  | 2.05269 | 1.07023 | 2.35302 | 2.14811 | 2.986   | 0.4244  | 0.252721  | 1.07023 | pv | 0.3159012 | 2.353024 | py |
| PF14_0342  | PKH_131320 | PVX_084730 | PY00619 | PBANKA_100870 | PCHAS_100960 | 2.581   | 4.63527 | 5.50389 | 2.85573 | 5.01844 | 4.49371 | 0.87119 | 0.6345785 | 2.581   | pf | 0.7932232 | 4.635267 | pk |
| PF14_0344  | PKH_131290 | PVX_084720 | PY02301 | PBANKA_100850 | PCHAS_100940 | 0.62979 | 0.8825  | 0.7043  | 2.2392  | 0.8056  | 0.20133 | 0.39865 | 0.1713951 | 2.2392  | py | 0.1889194 | 0.805602 | pb |
| PF14_0345a | PKH_131280 | PVX_084715 | PY02302 | PBANKA_100840 | PCHAS_100930 | 2.24477 | 1.91216 | 3.10706 | 6.03817 | 2.47859 | 5.53636 | 1.15168 | 0.7837008 | 5.53636 | pc | 0.3571778 | 6.038166 | py |
| PF14_0345b | PKH_131270 | PVX_084710 | PY02303 | PBANKA_100830 | PCHAS_100920 | 3.64102 | 0.55433 | 3.8501  | 4.70313 | 3.21433 | 2.68461 | 0.95683 | 0.530857  | 0.55433 | pk | 0.6113025 | 3.850099 | pv |
| PF14_0346  | PKH_131265 | PVX_084705 | PY02304 | PBANKA_100820 | PCHAS_100910 | 5.6783  | 5.49518 | 5.23096 | 1.96562 | 3.24792 | 3.80928 | 1.18902 | 0.8232568 | 1.96562 | py | 0.5333104 | 3.247921 | pb |
| PF14_0356  | PKH_131170 | PVX_084665 | PY07497 | PBANKA_061120 | PCHAS_061290 | 3.26026 | 2.98802 | 2.76221 | 6.25901 | 3.00359 | 2.919   | 0.59914 | 0.1165278 | 6.25901 | py | 0.1417679 | 3.003588 | pb |
| PF14_0359  | PKH_131140 | PVX_084650 | PY02476 | PBANKA_061090 | PCHAS_061260 | 2.42481 | 2.78149 | 2.22263 | 2.5878  | 2.31087 | 2.22515 | 0.17258 | 0.1129674 | 2.78149 | pk | 0.1191493 | 2.222627 | pv |
| PF14_0361  | PKH_126810 | PVX_118580 | PY02255 | PBANKA_130220 | PCHAS_130540 | 4.61278 | 1.25856 | 3.78992 | 5.71215 | 3.35728 | 4.17531 | 1.01575 | 0.6355458 | 1.25856 | pk | 0.6980843 | 3.789921 | pv |
| PF14_0363  | PKH_126800 | PVX_118575 | PY00663 | PBANKA_130230 | PCHAS_130550 | 5.30518 | 5.73084 | 5.06048 | 0.61668 | 5.36125 | 1.24964 | 0.73944 | 0.4530098 | 1.24964 | pc | 0.1816091 | 0.61668  | py |

|           |            |            |         |               |              |         |         |         |         |         |         |         |           |         |    |           |          |    |
|-----------|------------|------------|---------|---------------|--------------|---------|---------|---------|---------|---------|---------|---------|-----------|---------|----|-----------|----------|----|
| PF14_0365 | PKH_126780 | PVX_118565 | PY00666 | PBANKA_130250 | PCHAS_130570 | 1.42082 | 3.20833 | 3.92947 | 0.13508 | 1.20584 | 2.50603 | 1.14701 | 0.9022263 | 0.13508 | py | 0.8027367 | 1.205845 | pb |
| PF14_0366 | PKH_126770 | PVX_118560 | PY00667 | PBANKA_130260 | PCHAS_130580 | 4.0036  | 3.51833 | 4.64643 | 5.20973 | 4.19245 | 4.48642 | 0.43803 | 0.3221829 | 5.20973 | py | 0.4027286 | 4.192448 | pb |
| PF14_0368 | PKH_126740 | PVX_118545 | PY00414 | PBANKA_130280 | PCHAS_130600 | 2.69391 | 2.21593 | 2.7784  | 2.99689 | 3.73664 | 4.14857 | 0.53231 | 0.3647376 | 4.14857 | pc | 0.3153051 | 2.215932 | pk |
| PF14_0369 | PKH_126730 | PVX_118540 | PY00413 | PBANKA_130290 | PCHAS_130610 | 4.85272 | 1.26807 | 3.34951 | 5.35137 | 4.4381  | 4.25728 | 0.95174 | 0.5194604 | 1.26807 | pk | 0.3771792 | 3.349514 | pv |
| PF14_0372 | PKH_126700 | PVX_118525 | PY00410 | PBANKA_130320 | PCHAS_130640 | 6.02514 | 5.35465 | 4.86098 | 2.86639 | 5.9657  | 1.60981 | 1.13363 | 0.7404994 | 2.86639 | py | 0.9256243 | 5.965701 | pb |
| PF14_0373 | PKH_126690 | PVX_118520 | PY05634 | PBANKA_130330 | PCHAS_130650 | 4.95837 | 5.17207 | 4.6998  | 3.85675 | 4.50697 | 4.28865 | 0.36298 | 0.2669654 | 3.85675 | py | 0.2854984 | 4.506967 | pb |
| PF14_0374 | PKH_126680 | PVX_118515 | PY00826 | PBANKA_130340 | PCHAS_130660 | 6.05875 | 6.07805 | 4.76365 | 3.34312 | 4.09506 | 5.14842 | 0.84723 | 0.655619  | 3.34312 | py | 0.5561835 | 4.095061 | pb |
| PF14_0376 | PKH_126660 | PVX_118505 | PY00828 | PBANKA_130360 | PCHAS_130680 | 4.19944 | 3.99435 | 2.37921 | 3.5901  | 3.46752 | 2.67725 | 0.54332 | 0.4098047 | 2.37921 | pv | 0.5122558 | 3.590104 | py |
| PF14_0377 | PKH_126650 | PVX_118500 | PY06882 | PBANKA_130370 | PCHAS_130690 | 3.46123 | 1.83829 | 3.01208 | 3.23596 | 2.85508 | 4.2736  | 0.54422 | 0.3735343 | 1.83829 | pk | 0.4109466 | 3.012076 | pv |
| PF14_0379 | PKH_126630 | PVX_118490 | PY04304 | PBANKA_130390 | PCHAS_130710 | 4.52774 | 5.24614 | 4.82016 | 3.50484 | 5.33749 | 5.01732 | 0.45804 | 0.2471465 | 3.50484 | py | 0.2288919 | 5.337489 | pb |
| PF14_0383 | PKH_126590 | PVX_118470 | PY04301 | PBANKA_130430 | PCHAS_130750 | 5.28601 | 5.12291 | 5.0765  | 5.76015 | 5.26668 | 5.79547 | 0.22926 | 0.1693518 | 5.79547 | pc | 0.0883206 | 5.760154 | py |
| PF14_0386 | PKH_126560 | PVX_118455 | PY02583 | PBANKA_130460 | PCHAS_130780 | 3.25132 | 2.52839 | 2.94158 | 2.43945 | 3.10021 | 2.01885 | 0.3844  | 0.2767388 | 2.01885 | pc | 0.2684882 | 3.251317 | pf |
| PF14_0387 | PKH_126550 | PVX_118450 | PY02584 | PBANKA_130470 | PCHAS_130790 | 3.25274 | 2.66866 | 2.6983  | 6.03149 | 4.49595 | 4.70425 | 1.102   | 0.7666501 | 6.03149 | py | 0.647509  | 4.495953 | pb |
| PF14_0388 | PKH_126540 | PVX_118445 | PY02585 | PBANKA_130480 | PCHAS_130800 | 5.72008 | 6.01265 | 5.5537  | 4.64649 | 5.04049 | 5.60304 | 0.34918 | 0.2277076 | 4.64649 | py | 0.1439963 | 5.040488 | pb |
| PF14_0389 | PKH_126530 | PVX_118440 | PY02586 | PBANKA_130490 | PCHAS_130810 | 1.89031 | 2.52549 | 3.14482 | 3.05045 | 2.36833 | 2.90976 | 0.38682 | 0.2602909 | 1.89031 | pf | 0.2292962 | 2.525491 | pk |
| PF14_0392 | PKH_126500 | PVX_118425 | PY05330 | PBANKA_130520 | PCHAS_130840 | 5.43471 | 5.94913 | 6.0366  | 0.06601 | 5.83025 | 0.72858 | 0.36391 | 0.2241656 | 0.72858 | pc | 0.1516027 | 5.434711 | pf |
| PF14_0393 | PKH_126490 | PVX_118420 | PY06012 | PBANKA_130530 | PCHAS_130850 | 3.13661 | 4.54002 | 3.21913 | 3.29669 | 3.53719 | 4.40505 | 0.47164 | 0.3172992 | 4.54002 | pk | 0.3772358 | 3.219133 | pv |
| PF14_0395 | PKH_126470 | PVX_118410 | PY01295 | PBANKA_130550 | PCHAS_130870 | 4.69944 | 6.28174 | 5.21481 | 3.98107 | 0.653   | 5.84184 | 0.86074 | 0.6607329 | 3.98107 | py | 0.5523305 | 0.652998 | pb |
| PF14_0396 | PKH_126460 | PVX_118405 | PY01294 | PBANKA_130560 | PCHAS_130880 | 3.67246 | 2.13352 | 2.3119  | 3.25737 | 3.31361 | 1.79256 | 0.66758 | 0.5081307 | 1.79256 | pc | 0.5313906 | 3.672463 | pf |
| PF14_0397 | PKH_126450 | PVX_118400 | PY01293 | PBANKA_130570 | PCHAS_130890 | 4.10043 | 4.29938 | 5.52756 | 4.75082 | 3.67982 | 2.82689 | 0.66177 | 0.499627  | 2.82689 | pc | 0.317488  | 5.527565 | pv |
| PF14_0399 | PKH_126430 | PVX_118390 | PY00881 | PBANKA_130590 | PCHAS_130910 | 2.26383 | 3.4433  | 3.53529 | 3.45739 | 3.2674  | 4.01644 | 0.3391  | 0.1682056 | 2.26383 | pf | 0.2067332 | 3.443298 | pk |
| PF14_0401 | PKH_126400 | PVX_118375 | PY02994 | PBANKA_130620 | PCHAS_130940 | 1.91017 | 2.76768 | 2.4721  | 2.43954 | 2.63645 | 2.58637 | 0.19478 | 0.0984974 | 1.91017 | pf | 0.0777924 | 2.767685 | pk |

|           |            |            |         |               |              |         |         |         |         |         |         |         |           |         |    |           |          |    |
|-----------|------------|------------|---------|---------------|--------------|---------|---------|---------|---------|---------|---------|---------|-----------|---------|----|-----------|----------|----|
| PF14_0402 | PKH_126390 | PVX_118370 | PY02454 | PBANKA_130630 | PCHAS_130950 | 4.19636 | 4.79052 | 4.55894 | 2.35369 | 3.27386 | 1.93503 | 0.99721 | 0.7443806 | 1.93503 | pc | 0.4698096 | 2.353694 | py |
| PF14_0403 | PKH_126380 | PVX_118365 | PY02453 | PBANKA_130640 | PCHAS_130960 | 2.84065 | 3.1875  | 2.41134 | 2.36852 | 1.7916  | 2.55997 | 0.33611 | 0.249658  | 1.7916  | pb | 0.3120725 | 2.559972 | pc |
| PF14_0405 | PKH_126360 | PVX_118355 | PY05024 | PBANKA_130660 | PCHAS_130980 | 4.72822 | 5.19688 | 5.61148 | 4.5861  | 5.02301 | 5.63244 | 0.35058 | 0.2985388 | 4.5861  | py | 0.3297044 | 5.023006 | pb |
| PF14_0407 | PKH_126340 | PVX_118345 | PY00094 | PBANKA_130680 | PCHAS_131000 | 0.44212 | 3.75352 | 3.09465 | 2.2138  | 2.94281 | 1.94922 | 0.86431 | 0.5370316 | 0.44212 | pf | 0.4686115 | 3.753523 | pk |
| PF14_0408 | PKH_126330 | PVX_118340 | PY00095 | PBANKA_130690 | PCHAS_131010 | 5.12934 | 3.65297 | 5.81024 | 5.66707 | 5.39651 | 4.02143 | 0.67835 | 0.4653069 | 3.65297 | pk | 0.4782013 | 5.810241 | pv |
| PF14_0409 | PKH_126320 | PVX_118335 | PY00096 | PBANKA_130700 | PCHAS_131020 | 4.5373  | 4.6238  | 5.28807 | 2.92684 | 5.30421 | 4.7081  | 0.53541 | 0.2862343 | 2.92684 | py | 0.2087667 | 5.304209 | pb |
| PF14_0410 | PKH_126310 | PVX_118330 | PY01913 | PBANKA_130710 | PCHAS_131030 | 2.66712 | 3.1244  | 1.94423 | 5.43757 | 0.60327 | 1.19221 | 1.13098 | 0.7992096 | 5.43757 | py | 0.6637719 | 0.603266 | pb |
| PF14_0412 | PKH_126290 | PVX_118320 | PY01912 | PBANKA_130730 | PCHAS_131050 | 3.69155 | 2.52322 | 3.12245 | 4.48694 | 4.57412 | 3.76647 | 0.58172 | 0.4494145 | 2.52322 | pk | 0.400763  | 3.122449 | pv |
| PF14_0414 | PKH_126270 | PVX_118310 | PY01910 | PBANKA_130750 | PCHAS_131070 | 3.93743 | 3.70759 | 4.43918 | 3.09462 | 1.16124 | 3.75971 | 0.69548 | 0.3148812 | 1.16124 | pb | 0.3936015 | 3.759714 | pc |
| PF14_0415 | PKH_126260 | PVX_118305 | PY01909 | PBANKA_130760 | PCHAS_131080 | 4.61198 | 6.0874  | 5.13523 | 3.47301 | 3.48467 | 3.24039 | 0.93942 | 0.6067623 | 6.0874  | pk | 0.3458115 | 5.135233 | pv |
| PF14_0416 | PKH_126250 | PVX_118300 | PY01907 | PBANKA_130770 | PCHAS_131090 | 2.9496  | 1.53297 | 3.26714 | 2.42792 | 3.58542 | 2.22324 | 0.603   | 0.4402805 | 1.53297 | pk | 0.4709647 | 3.267142 | pv |
| PF14_0417 | PKH_126240 | PVX_118295 | PY01906 | PBANKA_130780 | PCHAS_131100 | 3.46545 | 2.53397 | 2.49213 | 2.28071 | 1.547   | 2.84632 | 0.42098 | 0.3077854 | 1.547   | pb | 0.3066435 | 2.846319 | pc |
| PF14_0421 | PKH_126200 | PVX_118280 | PY01678 | PBANKA_130820 | PCHAS_131140 | 5.15777 | 4.04017 | 1.34979 | 3.82949 | 3.86976 | 6.08099 | 1.03832 | 0.7079031 | 1.34979 | pv | 0.8322075 | 3.829488 | py |
| PF14_0423 | PKH_126180 | PVX_118270 | PY03319 | PBANKA_130840 | PCHAS_131160 | 0.60696 | 5.50171 | 6.25829 | 2.49482 | 4.56831 | 4.96225 | 1.10413 | 0.7235744 | 2.49482 | py | 0.6711186 | 4.56831  | pb |
| PF14_0425 | PKH_126150 | PVX_118255 | PY03709 | PBANKA_130860 | PCHAS_131180 | 4.39984 | 1.98045 | 0.89087 | 3.76966 | 2.51118 | 2.30859 | 0.9168  | 0.6819054 | 4.39984 | pf | 0.7703469 | 1.980447 | pk |
| PF14_0426 | PKH_126140 | PVX_118245 | PY03708 | PBANKA_130870 | PCHAS_131190 | 2.36929 | 3.66121 | 2.65988 | 5.24428 | 3.39513 | 2.88503 | 0.73107 | 0.4054366 | 5.24428 | py | 0.3792696 | 3.395133 | pb |
| PF14_0427 | PKH_126130 | PVX_118240 | PY03707 | PBANKA_130880 | PCHAS_131200 | 4.88928 | 3.31688 | 4.77445 | 3.25173 | 0.72119 | 4.46287 | 0.93944 | 0.6190226 | 0.72119 | pb | 0.7737783 | 4.46287  | pc |
| PF14_0428 | PKH_126120 | PVX_118235 | PY03706 | PBANKA_130890 | PCHAS_131210 | 1.79431 | 1.30554 | 2.83859 | 4.22848 | 1.50413 | 2.17495 | 0.77301 | 0.4407723 | 4.22848 | py | 0.4784216 | 1.504134 | pb |
| PF14_0431 | PKH_126090 | PVX_118220 | PY06874 | PBANKA_130920 | PCHAS_131240 | 1.72353 | 0.75062 | 1.89607 | 2.4114  | 0.32494 | 1.48575 | 0.57828 | 0.4142198 | 0.32494 | pb | 0.4583301 | 1.485753 | pc |
| PF14_0433 | PKH_126070 | PVX_118205 | PY05556 | PBANKA_130940 | PCHAS_131260 | 0.87683 | 0.73664 | 0.29684 | 0.74477 | 0.5601  | 5.83369 | 0.32513 | 0.1529334 | 5.83369 | pc | 0.1561172 | 0.876833 | pf |
| PF14_0434 | PKH_126060 | PVX_118200 | PY05555 | PBANKA_130950 | PCHAS_131270 | 2.3464  | 2.40677 | 2.43109 | 2.48835 | 1.80402 | 2.12819 | 0.1746  | 0.0889701 | 1.80402 | pb | 0.0415673 | 2.128187 | pc |
| PF14_0437 | PKH_126040 | PVX_118190 | PY01902 | PBANKA_130970 | PCHAS_131290 | 1.78704 | 1.15509 | 1.2286  | 2.1296  | 1.05329 | 0.42305 | 0.41897 | 0.3416524 | 0.42305 | pc | 0.2018153 | 2.129602 | py |

|             |            |            |         |               |              |         |         |         |         |         |         |         |           |         |    |           |          |    |
|-------------|------------|------------|---------|---------------|--------------|---------|---------|---------|---------|---------|---------|---------|-----------|---------|----|-----------|----------|----|
| PF14_0438   | PKH_126030 | PVX_118185 | PY01899 | PBANKA_130980 | PCHAS_131300 | 1.20232 | 3.53364 | 0.22284 | 5.72555 | 5.98362 | 5.62574 | 0.84837 | 0.5280477 | 3.53364 | pk | 0.5294585 | 0.222844 | pv |
| PF14_0441   | PKH_126000 | PVX_118170 | PY07062 | PBANKA_131010 | PCHAS_131330 | 2.97642 | 3.77733 | 5.70197 | 5.86827 | 3.87808 | 4.56998 | 0.91807 | 0.7829673 | 2.97642 | pf | 0.7805467 | 3.777328 | pk |
| PF14_0444   | PKH_125970 | PVX_118160 | PY01551 | PBANKA_131050 | PCHAS_131380 | 4.4078  | 5.48675 | 5.42333 | 4.97398 | 5.44186 | 5.16132 | 0.30147 | 0.1586628 | 4.4078  | pf | 0.1824741 | 5.486751 | pk |
| PF14_0447   | PKH_125950 | PVX_118150 | PY06896 | PBANKA_131070 | PCHAS_131400 | 3.61638 | 3.33265 | 5.93457 | 1.80457 | 4.47653 | 0.15891 | 1.34993 | 1.0547765 | 0.15891 | pc | 0.8655184 | 1.804567 | py |
| PF14_0450   | PKH_125920 | PVX_118135 | PY04851 | PBANKA_131100 | PCHAS_131430 | 1.54247 | 6.04746 | 4.28367 | 2.26614 | 1.03665 | 2.01809 | 1.03742 | 0.6966625 | 4.28367 | pv | 0.6899112 | 2.266142 | py |
| PF14_0451   | PKH_125910 | PVX_118130 | PY00396 | PBANKA_131110 | PCHAS_131440 | 3.06031 | 3.49209 | 2.82258 | 5.96346 | 3.36458 | 4.1723  | 0.73006 | 0.3563011 | 5.96346 | py | 0.4453763 | 3.364584 | pb |
| PF14_0453   | PKH_125870 | PVX_118110 | PY06003 | PBANKA_131150 | PCHAS_131480 | 3.53469 | 3.9223  | 1.88287 | 5.57708 | 3.88917 | 5.90504 | 1.01628 | 0.8116524 | 1.88287 | pv | 0.6008685 | 5.577084 | py |
| PF14_0455   | PKH_125840 | PVX_118100 | PY06054 | PBANKA_131170 | PCHAS_131500 | 2.85878 | 0.89548 | 0.91634 | 5.79485 | 5.65552 | 5.83851 | 0.98459 | 0.5855664 | 2.85878 | pf | 0.3969183 | 0.895481 | pk |
| PF14_0456   | PKH_125830 | PVX_118095 | PY01106 | PBANKA_131180 | PCHAS_131510 | 1.87531 | 1.39151 | 1.85876 | 1.97306 | 0.79023 | 1.59529 | 0.32168 | 0.1723129 | 0.79023 | pb | 0.149524  | 1.595295 | pc |
| PF14_0464   | PKH_125770 | PVX_118060 | PY05111 | PBANKA_131230 | PCHAS_131560 | 0.69303 | 3.5827  | 2.14006 | 4.32982 | 4.65339 | 5.69685 | 1.21231 | 0.9254953 | 0.69303 | pf | 0.9700898 | 3.582704 | pk |
| PF14_0465   | PKH_125760 | PVX_118055 | PY05110 | PBANKA_131240 | PCHAS_131570 | 1.18652 | 3.04755 | 2.21451 | 0.15941 | 2.43788 | 1.78348 | 0.76176 | 0.5030864 | 0.15941 | py | 0.5730149 | 2.437882 | pb |
| PF14_0467   | PKH_125730 | PVX_118040 | PY05966 | PBANKA_131270 | PCHAS_131600 | 6.0086  | 0.20726 | 6.05167 | 0.69831 | 0.08211 | 1.54495 | 0.47909 | 0.2823342 | 1.54495 | pc | 0.19887   | 0.698306 | py |
| PF14_0469-a | PKH_125700 | PVX_118025 | PY07313 | PBANKA_131300 | PCHAS_131630 | 0.62586 | 0.741   | 0.43483 | 0.46538 | 0.55653 | 1.29019 | 0.20005 | 0.0933299 | 1.29019 | pc | 0.0862393 | 0.434833 | pv |
| PF14_0470   | PKH_125690 | PVX_118020 | PY03745 | PBANKA_131310 | PCHAS_131640 | 4.41345 | 4.12962 | 4.76252 | 1.18847 | 5.06387 | 5.71605 | 0.82433 | 0.4473722 | 1.18847 | py | 0.4838785 | 5.063872 | pb |
| PF14_0471   | PKH_125680 | PVX_118015 | PY07598 | PBANKA_131320 | PCHAS_131650 | 3.98931 | 0.40685 | 4.62764 | 2.15517 | 4.08949 | 3.22622 | 1.00608 | 0.6671466 | 0.40685 | pk | 0.6743521 | 4.627639 | pv |
| PF14_0476   | PKH_125630 | PVX_117985 | PY01077 | PBANKA_131370 | PCHAS_131700 | 0.42437 | 0.33766 | 0.14009 | 5.72045 | 0.53685 | 5.8287  | 0.36267 | 0.2551221 | 5.72045 | py | 0.2691058 | 0.536851 | pb |
| PF14_0477   | PKH_125620 | PVX_117980 | PY06341 | PBANKA_131380 | PCHAS_131710 | 1.08639 | 1.80085 | 2.80027 | 2.08957 | 1.74433 | 5.25304 | 0.81502 | 0.4118239 | 5.25304 | pc | 0.2649258 | 2.80027  | pv |
| PF14_0478   | PKH_125600 | PVX_117970 | PY06344 | PBANKA_131400 | PCHAS_131730 | 1.43611 | 0.44819 | 2.14541 | 4.71895 | 3.38073 | 2.00828 | 1.05875 | 0.7283691 | 4.71895 | py | 0.5673496 | 3.380727 | pb |
| PF14_0480   | PKH_125580 | PVX_117960 | PY01987 | PBANKA_131420 | PCHAS_131750 | 5.27138 | 5.54761 | 4.58605 | 4.09899 | 2.22135 | 2.76433 | 1.0534  | 0.7911356 | 2.22135 | pb | 0.5334895 | 2.764327 | pc |
| PF14_0481   | PKH_125570 | PVX_117950 | PY01988 | PBANKA_131430 | PCHAS_131760 | 1.91142 | 2.15842 | 2.36058 | 5.19117 | 4.06003 | 2.08094 | 0.91017 | 0.4856493 | 5.19117 | py | 0.1316607 | 4.060027 | pb |
| PF14_0482   | PKH_125560 | PVX_117945 | PY01989 | PBANKA_131440 | PCHAS_131770 | 1.91732 | 2.79917 | 3.13292 | 2.62541 | 0.7425  | 2.22018 | 0.61292 | 0.3589181 | 0.7425  | pb | 0.3473398 | 2.220182 | pc |
| PF14_0483   | PKH_125550 | PVX_117940 | PY01990 | PBANKA_131450 | PCHAS_131780 | 3.28681 | 2.28349 | 2.67318 | 0.7341  | 2.29437 | 0.09619 | 0.85677 | 0.5884822 | 0.09619 | pc | 0.487491  | 3.286813 | pf |



|           |            |            |         |                   |                  |         |         |         |         |         |         |         |           |         |    |           |          |    |
|-----------|------------|------------|---------|-------------------|------------------|---------|---------|---------|---------|---------|---------|---------|-----------|---------|----|-----------|----------|----|
| PF14_0484 | PKH_125540 | PVX_117935 | PY01991 | PBANKA_131<br>460 | PCHAS_13179<br>0 | 3.60849 | 2.39097 | 2.71994 | 5.71082 | 3.0798  | 2.06265 | 0.87092 | 0.4469337 | 5.71082 | py | 0.4687027 | 3.079801 | pb |
| PF14_0486 | PKH_125520 | PVX_117925 | PY05356 | PBANKA_131<br>480 | PCHAS_13181<br>0 | 2.56501 | 2.49672 | 3.44248 | 2.64947 | 2.59417 | 2.82621 | 0.21038 | 0.0827911 | 3.44248 | pv | 0.0896636 | 2.649471 | py |
| PF14_0487 | PKH_125510 | PVX_117920 | PY05354 | PBANKA_131<br>490 | PCHAS_13182<br>0 | 0.88368 | 0.45453 | 1.16887 | 1.59556 | 0.48457 | 1.16898 | 0.35177 | 0.2797483 | 1.59556 | py | 0.2499081 | 0.484573 | pb |
| PF14_0489 | PKH_125490 | PVX_117910 | PY01626 | PBANKA_131<br>510 | PCHAS_13184<br>0 | 2.27858 | 5.46957 | 4.04061 | 0.98309 | 1.44457 | 3.53383 | 1.37316 | 1.0293537 | 5.46957 | pk | 0.8461859 | 4.040605 | pv |
| PF14_0490 | PKH_125480 | PVX_117905 | PY01625 | PBANKA_131<br>520 | PCHAS_13185<br>0 | 2.03805 | 3.79781 | 1.24563 | 3.19645 | 3.03674 | 0.10541 | 1.10699 | 0.7421159 | 0.10541 | pc | 0.7373781 | 3.797812 | pk |
| PF14_0491 | PKH_125470 | PVX_117900 | PY01624 | PBANKA_131<br>530 | PCHAS_13186<br>0 | 4.8709  | 3.88414 | 0.32505 | 0.39387 | 0.45518 | 3.23777 | 1.26218 | 0.9320773 | 3.23777 | pc | 0.4840713 | 3.884139 | pk |
| PF14_0492 | PKH_125460 | PVX_117895 | PY01623 | PBANKA_131<br>540 | PCHAS_13187<br>0 | 5.21595 | 5.61616 | 5.57028 | 4.69363 | 4.71541 | 5.14469 | 0.30811 | 0.2652673 | 4.69363 | py | 0.2064503 | 4.715412 | pb |
| PF14_0493 | PKH_125450 | PVX_117890 | PY01622 | PBANKA_131<br>550 | PCHAS_13188<br>0 | 4.1283  | 4.21621 | 3.99863 | 3.06976 | 3.19166 | 4.8075  | 0.48199 | 0.4166174 | 4.8075  | pc | 0.2885527 | 3.069755 | py |
| PF14_0494 | PKH_125440 | PVX_117885 | PY01621 | PBANKA_131<br>560 | PCHAS_13189<br>0 | 1.79728 | 1.02455 | 1.42814 | 1.70351 | 0.73482 | 1.70907 | 0.33706 | 0.2107315 | 0.73482 | pb | 0.2620228 | 1.709072 | pc |
| PF14_0495 | PKH_125430 | PVX_117880 | PY06813 | PBANKA_131<br>570 | PCHAS_13190<br>0 | 5.61927 | 5.83281 | 5.57203 | 2.92531 | 6.08615 | 5.40789 | 0.6055  | 0.1878074 | 2.92531 | py | 0.1180393 | 6.086153 | pb |
| PF14_0496 | PKH_125420 | PVX_117875 | PY06812 | PBANKA_131<br>580 | PCHAS_13191<br>0 | 1.63358 | 2.13809 | 1.99714 | 0.89715 | 0.82339 | 1.0623  | 0.49766 | 0.3820347 | 2.13809 | pk | 0.2438348 | 1.997138 | pv |
| PF14_0497 | PKH_125410 | PVX_117870 | PY06811 | PBANKA_131<br>590 | PCHAS_13192<br>0 | 3.50221 | 3.14194 | 2.90464 | 3.53216 | 2.90061 | 2.13618 | 0.37248 | 0.2458244 | 2.13618 | pc | 0.2097272 | 3.532155 | py |
| PF14_0499 | PKH_125390 | PVX_117860 | PY05178 | PBANKA_131<br>610 | PCHAS_13194<br>0 | 2.38165 | 1.12114 | 2.37306 | 2.82035 | 0.8781  | 1.59332 | 0.66375 | 0.4975079 | 0.8781  | pb | 0.426949  | 1.593321 | pc |
| PF14_0500 | PKH_125380 | PVX_117855 | PY05177 | PBANKA_131<br>620 | PCHAS_13195<br>0 | 4.85691 | 3.75058 | 3.92615 | 4.38292 | 3.15249 | 4.0329  | 0.40725 | 0.3126211 | 3.15249 | pb | 0.3907764 | 4.032898 | pc |
| PF14_0501 | PKH_125370 | PVX_117850 | PY00071 | PBANKA_131<br>630 | PCHAS_13196<br>0 | 4.87586 | 5.69949 | 3.7267  | 2.85073 | 2.59512 | 1.49962 | 1.2261  | 0.9015643 | 5.69949 | pk | 0.907961  | 3.726704 | pv |
| PF14_0502 | PKH_125360 | PVX_117845 | PY04945 | PBANKA_131<br>640 | PCHAS_13197<br>0 | 3.28089 | 5.32128 | 4.36827 | 2.9493  | 3.16438 | 3.35027 | 0.60754 | 0.3209709 | 5.32128 | pk | 0.1293694 | 4.368268 | pv |
| PF14_0504 | PKH_125340 | PVX_117830 | PY04947 | PBANKA_131<br>670 | PCHAS_13200<br>0 | 2.41721 | 1.10272 | 2.56129 | 2.67013 | 2.80115 | 2.12796 | 0.39745 | 0.1852233 | 1.10272 | pk | 0.2315291 | 2.561292 | pv |
| PF14_0507 | PKH_125310 | PVX_117810 | PY00259 | PBANKA_131<br>710 | PCHAS_13204<br>0 | 2.03953 | 4.92311 | 3.02994 | 2.80766 | 3.72876 | 2.28936 | 0.75754 | 0.4859629 | 4.92311 | pk | 0.5518835 | 3.029941 | pv |
| PF14_0511 | PKH_125270 | PVX_117790 | PY00793 | PBANKA_131<br>750 | PCHAS_13208<br>0 | 1.48837 | 3.46841 | 2.3643  | 3.22862 | 2.71707 | 3.08275 | 0.53501 | 0.3231309 | 1.48837 | pf | 0.3075    | 3.468405 | pk |
| PF14_0512 | PKH_125260 | PVX_117785 | PY00794 | PBANKA_131<br>760 | PCHAS_13209<br>0 | 1.12106 | 1.45954 | 1.34284 | 0.06418 | 0.55058 | 1.34358 | 0.40169 | 0.2262969 | 0.06418 | py | 0.0848067 | 0.550578 | pb |
| PF14_0513 | PKH_125250 | PVX_117780 | PY00795 | PBANKA_131<br>770 | PCHAS_13210<br>0 | 2.13    | 3.44481 | 6.1847  | 2.58887 | 3.54906 | 3.76694 | 0.8895  | 0.5194262 | 6.1847  | pv | 0.4352973 | 2.588866 | py |
| PF14_0515 | PKH_125230 | PVX_117770 | PY00796 | PBANKA_131<br>790 | PCHAS_13212<br>0 | 1.61256 | 1.04041 | 2.07702 | 2.25359 | 1.33235 | 2.076   | 0.40355 | 0.2771389 | 1.04041 | pk | 0.3461691 | 2.077018 | pv |

|           |            |            |         |                   |                  |         |         |         |         |         |         |         |           |         |    |           |          |    |
|-----------|------------|------------|---------|-------------------|------------------|---------|---------|---------|---------|---------|---------|---------|-----------|---------|----|-----------|----------|----|
| PF14_0517 | PKH_125210 | PVX_117760 | PY00855 | PBANKA_131<br>810 | PCHAS_13214<br>0 | 2.67953 | 1.46208 | 1.80946 | 2.49734 | 2.37488 | 2.07798 | 0.36704 | 0.2578864 | 1.46208 | pk | 0.1810034 | 1.809461 | pv |
| PF14_0518 | PKH_125200 | PVX_117755 | PY00856 | PBANKA_131<br>820 | PCHAS_13215<br>0 | 0.68209 | 5.81268 | 0.80915 | 1.10566 | 4.47914 | 0.24127 | 0.7717  | 0.4288093 | 4.47914 | pb | 0.4258046 | 0.241265 | pc |
| PF14_0519 | PKH_125190 | PVX_117750 | PY00857 | PBANKA_131<br>830 | PCHAS_13216<br>0 | 2.11213 | 3.34751 | 3.25568 | 5.22207 | 2.98441 | 2.81768 | 0.65184 | 0.3346771 | 5.22207 | py | 0.4183464 | 2.984413 | pb |
| PF14_0520 | PKH_125180 | PVX_117745 | PY00858 | PBANKA_131<br>840 | PCHAS_13217<br>0 | 3.181   | 3.04983 | 2.67198 | 2.95772 | 3.17233 | 2.98797 | 0.13091 | 0.0815259 | 2.67198 | pv | 0.0788795 | 2.957722 | py |
| PF14_0522 | PKH_125160 | PVX_117735 | PY00860 | PBANKA_131<br>860 | PCHAS_13219<br>0 | 0.35536 | 5.99833 | 0.61128 | 6.15448 | 0.3381  | 5.56763 | 0.40564 | 0.2760407 | 5.56763 | pc | 0.2767569 | 0.611278 | pv |
| PF14_0530 | PKH_125050 | PVX_117685 | PY05745 | PBANKA_131<br>930 | PCHAS_13226<br>0 | 5.24016 | 5.58161 | 4.8562  | 0.33115 | 5.22089 | 5.31442 | 0.36552 | 0.1637862 | 0.33115 | py | 0.1999153 | 5.220888 | pb |
| PF14_0534 | PKH_125000 | PVX_117660 | PY00669 | PBANKA_131<br>980 | PCHAS_13231<br>0 | 3.04275 | 3.14798 | 2.61917 | 5.67049 | 1.5342  | 2.09474 | 0.93552 | 0.5123554 | 5.67049 | py | 0.3692037 | 1.534204 | pb |
| PF14_0538 | PKH_124960 | PVX_117640 | PY02373 | PBANKA_132<br>020 | PCHAS_13235<br>0 | 4.01779 | 4.61695 | 5.02971 | 5.47817 | 4.79345 | 4.20073 | 0.41098 | 0.3209265 | 5.47817 | py | 0.357034  | 4.793445 | pb |
| PF14_0539 | PKH_124950 | PVX_117635 | PY02374 | PBANKA_132<br>030 | PCHAS_13236<br>0 | 3.51551 | 3.68124 | 3.62491 | 3.58692 | 2.61913 | 3.56658 | 0.19864 | 0.0448142 | 2.61913 | pb | 0.0509314 | 3.566576 | pc |
| PF14_0540 | PKH_124940 | PVX_117630 | PY02375 | PBANKA_132<br>040 | PCHAS_13237<br>0 | 2.9921  | 3.8248  | 4.58592 | 1.00519 | 3.3989  | 5.5946  | 1.10152 | 0.7579026 | 1.00519 | py | 0.8409035 | 3.398903 | pb |
| PF14_0541 | PKH_124930 | PVX_117625 | PY06858 | PBANKA_132<br>050 | PCHAS_13238<br>0 | 1.27504 | 2.38375 | 0.09359 | 2.31478 | 0.83325 | 0.58662 | 0.74335 | 0.6557322 | 0.09359 | pv | 0.5597314 | 2.314777 | py |
| PF14_0543 | PKH_124910 | PVX_117615 | PY06507 | PBANKA_132<br>070 | PCHAS_13240<br>0 | 3.50517 | 3.963   | 4.49184 | 3.90477 | 4.18102 | 4.80246 | 0.3504  | 0.2525854 | 4.80246 | pc | 0.2012721 | 3.505165 | pf |
| PF14_0546 | PKH_124880 | PVX_117600 | PY04186 | PBANKA_132<br>100 | PCHAS_13243<br>0 | 2.27159 | 0.56153 | 1.96624 | 1.8456  | 1.39932 | 1.48947 | 0.43885 | 0.2698072 | 0.56153 | pk | 0.3071003 | 1.966238 | pv |
| PF14_0547 | PKH_124870 | PVX_117595 | PY04187 | PBANKA_132<br>110 | PCHAS_13244<br>0 | 1.01036 | 4.12989 | 2.7748  | 1.96373 | 2.8997  | 2.46669 | 0.72726 | 0.5400793 | 4.12989 | pk | 0.5980738 | 2.774795 | pv |
| PF14_0548 | PKH_124860 | PVX_117590 | PY00672 | PBANKA_132<br>120 | PCHAS_13245<br>0 | 5.17752 | 5.68061 | 4.74305 | 1.3929  | 1.16705 | 4.41321 | 1.07886 | 0.7949181 | 1.3929  | py | 0.4254695 | 1.167051 | pb |
| PF14_0549 | PKH_124850 | PVX_117585 | PY00673 | PBANKA_132<br>130 | PCHAS_13246<br>0 | 1.62535 | 2.70386 | 1.66848 | 2.54191 | 2.76193 | 1.80517 | 0.48478 | 0.3903896 | 2.76193 | pb | 0.487987  | 1.805175 | pc |
| PF14_0550 | PKH_124840 | PVX_117580 | PY00674 | PBANKA_132<br>140 | PCHAS_13247<br>0 | 1.64376 | 1.32618 | 1.93145 | 1.13246 | 0.66761 | 1.6355  | 0.34741 | 0.2233123 | 0.66761 | pb | 0.2791404 | 1.635495 | pc |
| PF14_0551 | PKH_124830 | PVX_117575 | PY00675 | PBANKA_132<br>150 | PCHAS_13248<br>0 | 5.22494 | 4.55511 | 5.91804 | 5.80749 | 0.2388  | 2.46199 | 0.93294 | 0.5319946 | 2.46199 | pc | 0.3518972 | 4.555106 | pk |
| PF14_0557 | PKH_124770 | PVX_117545 | PY06026 | PBANKA_132<br>210 | PCHAS_13254<br>0 | 2.31788 | 2.96716 | 1.7527  | 4.45904 | 4.43936 | 5.11441 | 1.16251 | 0.8576805 | 1.7527  | pv | 1.0671803 | 4.459039 | py |
| PF14_0558 | PKH_124760 | PVX_117540 | PY06000 | PBANKA_132<br>220 | PCHAS_13255<br>0 | 4.67806 | 4.12238 | 5.25997 | 3.0662  | 4.95078 | 2.24658 | 0.90894 | 0.6044346 | 2.24658 | pc | 0.3525779 | 3.066203 | py |
| PF14_0559 | PKH_124750 | PVX_117535 | PY05450 | PBANKA_132<br>230 | PCHAS_13256<br>0 | 1.51656 | 3.51287 | 2.42527 | 1.80925 | 3.26982 | 1.90691 | 0.66254 | 0.4738545 | 3.51287 | pk | 0.4627295 | 2.425266 | pv |
| PF14_0560 | PKH_124740 | PVX_117530 | PY05451 | PBANKA_132<br>240 | PCHAS_13257<br>0 | 4.57924 | 0.64715 | 4.67214 | 6.14431 | 4.32955 | 4.7972  | 0.71515 | 0.4065432 | 0.64715 | pk | 0.508179  | 4.672141 | pv |



|           |            |            |         |                   |                  |         |         |         |         |         |         |         |           |         |    |           |          |    |
|-----------|------------|------------|---------|-------------------|------------------|---------|---------|---------|---------|---------|---------|---------|-----------|---------|----|-----------|----------|----|
| PF14_0563 | PKH_124710 | PVX_117510 | PY06529 | PBANKA_132<br>270 | PCHAS_13260<br>0 | 1.61769 | 3.56648 | 2.4783  | 2.35511 | 1.30951 | 1.8358  | 0.60615 | 0.381244  | 3.56648 | pk | 0.3159294 | 2.478303 | pv |
| PF14_0564 | PKH_124700 | PVX_117505 | PY06530 | PBANKA_132<br>280 | PCHAS_13261<br>0 | 2.68469 | 2.67308 | 2.86449 | 2.34024 | 2.37792 | 1.77042 | 0.28894 | 0.1662026 | 1.77042 | pc | 0.1599008 | 2.864487 | pv |
| PF14_0566 | PKH_124680 | PVX_117495 | PY06531 | PBANKA_132<br>290 | PCHAS_13262<br>0 | 5.48917 | 3.76572 | 2.5575  | 5.49156 | 4.788   | 4.58871 | 0.80947 | 0.5252593 | 2.5575  | pv | 0.4806852 | 5.491555 | py |
| PF14_0567 | PKH_124670 | PVX_117490 | PY06532 | PBANKA_132<br>300 | PCHAS_13263<br>0 | 0.27271 | 2.77152 | 3.64166 | 0.2781  | 0.6665  | 3.68862 | 1.44658 | 1.151974  | 3.64166 | pv | 1.3802349 | 0.278097 | py |
| PF14_0568 | PKH_124660 | PVX_117485 | PY06533 | PBANKA_132<br>310 | PCHAS_13264<br>0 | 2.83474 | 3.64568 | 3.09033 | 1.95027 | 1.68272 | 2.58084 | 0.55949 | 0.4584168 | 3.64568 | pk | 0.4456467 | 3.090333 | pv |
| PF14_0569 | PKH_124650 | PVX_117480 | PY05521 | PBANKA_132<br>320 | PCHAS_13265<br>0 | 2.365   | 4.9646  | 3.39447 | 1.35758 | 3.0686  | 2.483   | 0.87035 | 0.5480977 | 4.9646  | pk | 0.4572539 | 3.394469 | pv |
| PF14_0570 | PKH_124640 | PVX_117475 | PY05519 | PBANKA_132<br>330 | PCHAS_13266<br>0 | 3.70281 | 4.08946 | 2.92011 | 6.0773  | 4.39383 | 2.77383 | 0.86064 | 0.5578709 | 6.0773  | py | 0.5245833 | 4.393831 | pb |
| PF14_0571 | PKH_124630 | PVX_117470 | PY05518 | PBANKA_132<br>340 | PCHAS_13267<br>0 | 3.53808 | 5.62642 | 1.38895 | 2.89475 | 3.75218 | 5.46569 | 1.17042 | 0.9318554 | 1.38895 | pv | 0.9504628 | 2.894753 | py |
| PF14_0572 | PKH_124620 | PVX_117465 | PY01918 | PBANKA_132<br>350 | PCHAS_13268<br>0 | 5.52403 | 5.98296 | 5.42433 | 5.14626 | 5.51937 | 5.6569  | 0.17899 | 0.1220684 | 5.98296 | pk | 0.1288241 | 5.424328 | pv |
| PF14_0574 | PKH_124600 | PVX_117455 | PY01916 | PBANKA_132<br>370 | PCHAS_13270<br>0 | 0.65641 | 0.80188 | 1.31979 | 2.59455 | 0.83473 | 1.72625 | 0.55793 | 0.3175493 | 2.59455 | py | 0.3969366 | 0.834729 | pb |
| PF14_0576 | PKH_124560 | PVX_117435 | PY01755 | PBANKA_132<br>410 | PCHAS_13274<br>0 | 2.36477 | 1.9279  | 2.58078 | 5.48228 | 2.90112 | 3.28969 | 0.79994 | 0.3796292 | 5.48228 | py | 0.3944523 | 2.901121 | pb |
| PF14_0578 | PKH_124540 | PVX_117425 | PY01752 | PBANKA_132<br>430 | PCHAS_13276<br>0 | 5.74484 | 5.93815 | 5.42104 | 5.47672 | 5.85003 | 5.86787 | 0.16891 | 0.1168913 | 5.42104 | pv | 0.0527866 | 5.476717 | py |
| PF14_0579 | PKH_124530 | PVX_117420 | PY01750 | PBANKA_132<br>440 | PCHAS_13277<br>0 | 2.12396 | 2.79934 | 2.52155 | 2.6035  | 2.32573 | 1.95172 | 0.25383 | 0.1906285 | 1.95172 | pc | 0.168839  | 2.799335 | pk |
| PF14_0584 | PKH_124480 | PVX_117395 | PY04143 | PBANKA_132<br>490 | PCHAS_13282<br>0 | 1.51887 | 0.88823 | 2.15965 | 0.39032 | 0.63413 | 1.19195 | 0.49297 | 0.3372744 | 2.15965 | pv | 0.2971148 | 0.390318 | py |
| PF14_0589 | PKH_124410 | PVX_117360 | PY00514 | PBANKA_132<br>560 | PCHAS_13289<br>0 | 2.2389  | 2.72502 | 2.77724 | 2.69514 | 2.71538 | 2.42195 | 0.14361 | 0.0770357 | 2.2389  | pf | 0.0938854 | 2.725021 | pk |
| PF14_0592 | PKH_124390 | PVX_117350 | PY05869 | PBANKA_132<br>590 | PCHAS_13292<br>0 | 3.96771 | 6.17458 | 3.85469 | 4.46403 | 3.19085 | 4.72668 | 0.72534 | 0.4290336 | 6.17458 | pk | 0.5080372 | 3.854689 | pv |
| PF14_0593 | PKH_124380 | PVX_117345 | PY05870 | PBANKA_132<br>600 | PCHAS_13293<br>0 | 2.40343 | 4.40142 | 5.3836  | 2.69028 | 1.40582 | 5.32621 | 1.43528 | 1.123219  | 1.40582 | pb | 1.172827  | 5.326209 | pc |
| PF14_0597 | PKH_124300 | PVX_117325 | PY03278 | PBANKA_132<br>630 | PCHAS_13296<br>0 | 4.55002 | 4.17786 | 4.56875 | 4.14843 | 4.00863 | 4.315   | 0.18314 | 0.158496  | 4.00863 | pb | 0.19812   | 4.314997 | pc |
| PF14_0600 | PKH_124270 | PVX_117315 | PY03282 | PBANKA_132<br>660 | PCHAS_13299<br>0 | 2.22281 | 1.43067 | 0.65485 | 0.41381 | 0.39948 | 0.51358 | 0.49691 | 0.2544463 | 2.22281 | pf | 0.0887858 | 1.430672 | pk |
| PF14_0607 | PKH_124170 | PVX_117270 | PY06776 | PBANKA_132<br>710 | PCHAS_13310<br>0 | 5.67421 | 5.91364 | 5.63056 | 5.28378 | 5.55717 | 5.99661 | 0.18549 | 0.1445029 | 5.28378 | py | 0.1513699 | 5.557172 | pb |
| PF14_0608 | PKH_124160 | PVX_117265 | PY04483 | PBANKA_132<br>740 | PCHAS_13320<br>0 | 1.67016 | 2.68975 | 3.39443 | 2.05184 | 3.14941 | 2.42296 | 0.51477 | 0.4138066 | 1.67016 | pf | 0.5172582 | 2.689751 | pk |
| PF14_0609 | PKH_124150 | PVX_117260 | PY04484 | PBANKA_132<br>750 | PCHAS_13321<br>0 | 2.9216  | 2.8991  | 2.75185 | 2.85563 | 2.56449 | 2.08386 | 0.21269 | 0.100871  | 2.08386 | pc | 0.0533028 | 2.56449  | pb |

|             |            |            |         |                   |                  |         |         |         |         |         |         |         |           |         |    |           |          |    |
|-------------|------------|------------|---------|-------------------|------------------|---------|---------|---------|---------|---------|---------|---------|-----------|---------|----|-----------|----------|----|
| PF14_0610   | PKH_124140 | PVX_117255 | PY04485 | PBANKA_132<br>760 | PCHAS_13322<br>0 | 1.23911 | 1.26557 | 1.24133 | 2.05264 | 1.52459 | 1.56465 | 0.23264 | 0.1217594 | 2.05264 | py | 0.0874463 | 1.524587 | pb |
| PF14_0614   | PKH_124100 | PVX_117230 | PY04404 | PBANKA_132<br>800 | PCHAS_13326<br>0 | 0.35879 | 1.69538 | 0.70178 | 4.92514 | 5.99115 | 6.0856  | 0.76727 | 0.5421287 | 1.69538 | pk | 0.4528212 | 0.701778 | pv |
| PF14_0615   | PKH_124090 | PVX_117225 | PY04403 | PBANKA_132<br>810 | PCHAS_13327<br>0 | 0.18536 | 0.03277 | 5.99761 | 3.60593 | 3.53693 | 4.84584 | 1.13223 | 0.8665452 | 3.53693 | pb | 0.7952397 | 4.845842 | pc |
| PF14_0616   | PKH_124070 | PVX_117215 | PY04402 | PBANKA_132<br>830 | PCHAS_13329<br>0 | 1.50086 | 2.10191 | 2.06575 | 2.25618 | 2.3756  | 1.93268 | 0.20573 | 0.1266683 | 1.50086 | pf | 0.1583354 | 2.101907 | pk |
| PF14_0617   | PKH_124060 | PVX_117210 | PY01373 | PBANKA_132<br>840 | PCHAS_13330<br>0 | 5.02124 | 4.04277 | 0.30483 | 4.60603 | 4.29873 | 4.35589 | 0.58631 | 0.257152  | 0.30483 | pv | 0.2589062 | 4.606025 | py |
| PF14_0618   | PKH_124050 | PVX_117205 | PY01372 | PBANKA_132<br>850 | PCHAS_13331<br>0 | 4.41858 | 3.91009 | 1.69547 | 2.82558 | 3.55481 | 2.10289 | 0.87659 | 0.6800398 | 1.69547 | pv | 0.6677421 | 2.825579 | py |
| PF14_0619   | PKH_124040 | PVX_117200 | PY01371 | PBANKA_132<br>860 | PCHAS_13332<br>0 | 1.97174 | 2.80764 | 2.4679  | 5.16514 | 3.23088 | 2.61448 | 0.69159 | 0.3197764 | 5.16514 | py | 0.2456216 | 3.230878 | pb |
| PF14_0620   | PKH_124030 | PVX_117195 | PY01370 | PBANKA_132<br>870 | PCHAS_13333<br>0 | 1.93681 | 0.97442 | 2.51396 | 4.60814 | 3.206   | 2.0344  | 0.89708 | 0.5617454 | 4.60814 | py | 0.4092817 | 3.206001 | pb |
| PF14_0632   | PKH_123930 | PVX_117150 | PY00248 | PBANKA_132<br>970 | PCHAS_13343<br>0 | 3.80514 | 6.18575 | 3.42084 | 6.27381 | 1.96229 | 2.97882 | 1.31712 | 1.027567  | 6.18575 | pk | 1.2077622 | 3.42084  | pv |
| PF14_0639   | PKH_123840 | PVX_117110 | PY05580 | PBANKA_133<br>040 | PCHAS_13350<br>0 | 2.07421 | 1.61317 | 1.44316 | 2.6523  | 2.91564 | 2.85497 | 0.54873 | 0.4166457 | 1.44316 | pv | 0.5208071 | 2.652302 | py |
| PF14_0641   | PKH_123820 | PVX_117100 | PY05578 | PBANKA_133<br>060 | PCHAS_13352<br>0 | 4.05714 | 3.52901 | 4.55143 | 3.24141 | 3.32689 | 3.00056 | 0.42812 | 0.2688349 | 4.55143 | pv | 0.3146727 | 3.241407 | py |
| PF14_0643   | PKH_123800 | PVX_117090 | PY05576 | PBANKA_133<br>080 | PCHAS_13354<br>0 | 2.46294 | 3.33461 | 0.94112 | 4.56075 | 3.40375 | 2.67134 | 0.87062 | 0.566044  | 0.94112 | pv | 0.4010205 | 4.560745 | py |
| PF14_0645   | PKH_123780 | PVX_117080 | PY03682 | PBANKA_133<br>100 | PCHAS_13356<br>0 | 1.97051 | 2.34137 | 2.50751 | 5.23189 | 3.13575 | 3.07983 | 0.77135 | 0.3807414 | 5.23189 | py | 0.3188651 | 3.135753 | pb |
| PF14_0646   | PKH_123770 | PVX_117075 | PY03683 | PBANKA_133<br>110 | PCHAS_13357<br>0 | 3.34446 | 2.62139 | 4.56188 | 3.51452 | 4.50616 | 4.07774 | 0.6109  | 0.4418122 | 2.62139 | pk | 0.4312307 | 4.561883 | pv |
| PF14_0649   | PKH_123730 | PVX_117060 | PY01412 | PBANKA_133<br>140 | PCHAS_13360<br>0 | 3.15144 | 6.22535 | 2.71926 | 1.58571 | 1.77263 | 1.98615 | 0.75939 | 0.5024732 | 6.22535 | pk | 0.4448144 | 2.719262 | pv |
| PF14_0650   | PKH_123720 | PVX_117055 | PY02060 | PBANKA_133<br>150 | PCHAS_13361<br>0 | 2.82106 | 0.31921 | 0.63369 | 1.74426 | 3.57472 | 2.45965 | 1.02638 | 0.8655628 | 3.57472 | pb | 0.9031055 | 2.459652 | pc |
| PF14_0652   | PKH_123700 | PVX_117045 | PY02869 | PBANKA_133<br>170 | PCHAS_13363<br>0 | 6.00309 | 6.14541 | 5.71479 | 5.90808 | 6.01163 | 5.73104 | 0.13437 | 0.1137777 | 6.14541 | pk | 0.0939014 | 5.714794 | pv |
| PF14_0653-a | PKH_123690 | PVX_117040 | PY02870 | PBANKA_133<br>180 | PCHAS_13364<br>0 | 4.72115 | 5.62079 | 3.98409 | 4.95259 | 4.0202  | 1.96432 | 0.88765 | 0.5138166 | 1.96432 | pc | 0.417363  | 5.620785 | pk |
| PF14_0655   | PKH_123670 | PVX_117030 | PY04360 | PBANKA_133<br>190 | PCHAS_13365<br>0 | 2.4046  | 1.48227 | 2.31476 | 2.96515 | 1.80277 | 3.71102 | 0.58016 | 0.4169407 | 3.71102 | pc | 0.3130535 | 1.482274 | pk |
| PF14_0656   | PKH_123660 | PVX_117025 | PY04361 | PBANKA_133<br>200 | PCHAS_13366<br>0 | 2.71589 | 2.39339 | 2.46606 | 5.40504 | 2.68824 | 1.96545 | 0.66405 | 0.2090581 | 5.40504 | py | 0.2057777 | 2.688239 | pb |
| PF14_0657   | PKH_123650 | PVX_117020 | PY04362 | PBANKA_133<br>210 | PCHAS_13367<br>0 | 2.22892 | 2.50822 | 2.34796 | 2.30319 | 3.14783 | 2.18207 | 0.21497 | 0.0890369 | 3.14783 | pb | 0.0810162 | 2.182069 | pc |
| PF14_0660   | PKH_123600 | PVX_117005 | PY03645 | PBANKA_133<br>240 | PCHAS_13370<br>0 | 5.86396 | 6.12336 | 5.37337 | 2.76689 | 4.26823 | 4.67254 | 0.94217 | 0.6093096 | 2.76689 | py | 0.4853524 | 4.268231 | pb |

|           |            |            |         |                   |                  |         |         |         |         |         |         |         |           |         |    |           |          |    |
|-----------|------------|------------|---------|-------------------|------------------|---------|---------|---------|---------|---------|---------|---------|-----------|---------|----|-----------|----------|----|
| PF14_0661 | PKH_123590 | PVX_117000 | PY03646 | PBANKA_133<br>250 | PCHAS_13371<br>0 | 1.83617 | 1.80972 | 2.39899 | 6.02081 | 0.44273 | 1.31567 | 0.75814 | 0.4953521 | 6.02081 | py | 0.2774434 | 0.442731 | pb |
| PF14_0663 | PKH_123570 | PVX_116990 | PY07221 | PBANKA_133<br>260 | PCHAS_13372<br>0 | 1.91086 | 1.39427 | 1.14699 | 3.40405 | 2.71517 | 1.98208 | 0.6082  | 0.4311995 | 3.40405 | py | 0.3379218 | 2.715172 | pb |
| PF14_0664 | PKH_123560 | PVX_116985 | PY01695 | PBANKA_133<br>280 | PCHAS_13374<br>0 | 3.73724 | 4.67657 | 5.73331 | 5.08365 | 0.72444 | 3.453   | 0.99296 | 0.7253456 | 0.72444 | pb | 0.6007906 | 3.453005 | pc |
| PF14_0666 | PKH_123540 | PVX_116975 | PY01697 | PBANKA_133<br>300 | PCHAS_13376<br>0 | 3.96505 | 3.51941 | 3.01574 | 5.37058 | 3.5546  | 3.11661 | 0.53975 | 0.2774619 | 5.37058 | py | 0.3380279 | 3.554603 | pb |
| PF14_0667 | PKH_123530 | PVX_116970 | PY01698 | PBANKA_133<br>310 | PCHAS_13377<br>0 | 0.31557 | 4.06479 | 0.38306 | 3.56217 | 0.30365 | 1.38209 | 1.11941 | 0.7359779 | 3.56217 | py | 0.9169937 | 0.303654 | pb |
| PF14_0668 | PKH_123520 | PVX_116965 | PY01699 | PBANKA_133<br>330 | PCHAS_13379<br>0 | 2.80685 | 3.19351 | 2.88394 | 5.25834 | 3.84817 | 2.47739 | 0.68864 | 0.3514885 | 5.25834 | py | 0.1983032 | 3.848168 | pb |
| PF14_0669 | PKH_123510 | PVX_116960 | PY06654 | PBANKA_133<br>340 | PCHAS_13380<br>0 | 1.56326 | 2.33837 | 2.4281  | 5.84707 | 0.10152 | 1.50027 | 0.86068 | 0.6329357 | 5.84707 | py | 0.4257346 | 0.101521 | pb |
| PF14_0670 | PKH_123500 | PVX_116955 | PY06653 | PBANKA_133<br>350 | PCHAS_13381<br>0 | 1.25553 | 2.73243 | 0.31014 | 2.10906 | 5.10941 | 1.45853 | 0.98469 | 0.6551647 | 5.10941 | pb | 0.8189559 | 1.458533 | pc |
| PF14_0671 | PKH_123490 | PVX_116950 | PY06652 | PBANKA_133<br>360 | PCHAS_13382<br>0 | 3.7578  | 3.8209  | 5.45798 | 4.15052 | 4.34181 | 4.64348 | 0.45234 | 0.2813192 | 5.45798 | pv | 0.351649  | 4.150519 | py |
| PF14_0672 | PKH_123480 | PVX_116945 | PY07430 | PBANKA_133<br>370 | PCHAS_13383<br>0 | 5.94534 | 5.53922 | 5.9877  | 3.65238 | 0.41821 | 2.376   | 1.03522 | 0.6994981 | 2.376   | pc | 0.301133  | 3.652385 | py |
| PF14_0673 | PKH_123470 | PVX_116940 | PY03618 | PBANKA_133<br>380 | PCHAS_13384<br>0 | 2.60447 | 2.33893 | 2.21035 | 2.04667 | 2.62084 | 1.62155 | 0.28094 | 0.1936593 | 1.62155 | pc | 0.1715943 | 2.620844 | pb |
| PF14_0674 | PKH_123460 | PVX_116935 | PY03617 | PBANKA_133<br>390 | PCHAS_13385<br>0 | 2.80983 | 2.17444 | 2.90574 | 1.5167  | 3.06204 | 1.71309 | 0.56223 | 0.4160492 | 1.5167  | py | 0.4570092 | 3.062039 | pb |
| PF14_0676 | PKH_123440 | PVX_116925 | PY06665 | PBANKA_133<br>410 | PCHAS_13387<br>0 | 3.69882 | 4.81609 | 2.03939 | 5.83162 | 3.74911 | 3.61002 | 0.84143 | 0.6677737 | 2.03939 | pv | 0.3140916 | 5.831615 | py |
| PF14_0677 | PKH_123430 | PVX_116920 | PY05891 | PBANKA_133<br>420 | PCHAS_13388<br>0 | 1.94806 | 1.03847 | 1.87584 | 1.1516  | 0.9171  | 1.27917 | 0.33265 | 0.2398885 | 1.94806 | pf | 0.2715782 | 1.038468 | pk |
| PF14_0678 | PKH_123420 | PVX_116915 | PY05892 | PBANKA_133<br>430 | PCHAS_13389<br>0 | 3.17041 | 1.54108 | 0.81849 | 5.51364 | 0.48827 | 5.22753 | 1.14449 | 0.8369547 | 3.17041 | pf | 0.7829894 | 1.541082 | pk |
| PF14_0680 | PKH_123400 | PVX_116905 | PY07225 | PBANKA_133<br>450 | PCHAS_13391<br>0 | 3.92866 | 3.38165 | 3.11213 | 2.40992 | 2.84247 | 3.01412 | 0.35932 | 0.2482785 | 3.92866 | pf | 0.218465  | 3.381653 | pk |
| PF14_0681 | PKH_123390 | PVX_116900 | PY06359 | PBANKA_133<br>460 | PCHAS_13392<br>0 | 5.07199 | 5.71475 | 0.25664 | 0.71116 | 0.64154 | 5.17262 | 0.74992 | 0.6063415 | 5.07199 | pf | 0.5516587 | 5.714749 | pk |
| PF14_0688 | PKH_123330 | PVX_116880 | PY05359 | PBANKA_133<br>520 | PCHAS_13398<br>0 | 0.99858 | 2.8231  | 0.14867 | 2.19936 | 3.00549 | 1.03965 | 0.97351 | 0.7580718 | 0.14867 | pv | 0.9475898 | 2.199359 | py |
| PF14_0693 | PKH_123280 | PVX_116855 | PY06321 | PBANKA_133<br>570 | PCHAS_13403<br>0 | 5.94287 | 3.89498 | 0.19638 | 1.90002 | 6.12687 | 2.12003 | 1.18354 | 0.9033353 | 3.89498 | pk | 1.1291691 | 0.196381 | pv |
| PF14_0695 | PKH_123260 | PVX_116845 | PY04295 | PBANKA_133<br>590 | PCHAS_13405<br>0 | 5.23171 | 3.99705 | 3.77583 | 5.15762 | 3.54648 | 3.87565 | 0.5314  | 0.3664737 | 5.23171 | pf | 0.4277407 | 3.997055 | pk |
| PF14_0696 | PKH_123250 | PVX_116840 | PY04294 | PBANKA_133<br>600 | PCHAS_13406<br>0 | 4.42127 | 4.153   | 2.91852 | 1.9973  | 3.39684 | 4.93094 | 0.86543 | 0.6073711 | 1.9973  | py | 0.5701738 | 3.39684  | pb |
| PF14_0699 | PKH_123220 | PVX_116825 | PY04291 | PBANKA_133<br>630 | PCHAS_13409<br>0 | 2.53369 | 4.10333 | 3.35672 | 3.84704 | 4.13989 | 3.52359 | 0.44604 | 0.2725801 | 2.53369 | pf | 0.2766524 | 4.103326 | pk |

|             |            |            |         |                   |                  |         |         |         |         |         |         |         |           |         |    |           |          |    |
|-------------|------------|------------|---------|-------------------|------------------|---------|---------|---------|---------|---------|---------|---------|-----------|---------|----|-----------|----------|----|
| PF14_0700   | PKH_123210 | PVX_116820 | PY03688 | PBANKA_133<br>640 | PCHAS_13410<br>0 | 3.22049 | 4.66831 | 4.68711 | 4.43144 | 4.78344 | 4.88306 | 0.3389  | 0.113351  | 3.22049 | pf | 0.1369896 | 4.668312 | pk |
| PF14_0704   | PKH_123180 | PVX_116805 | PY03692 | PBANKA_133<br>670 | PCHAS_13413<br>0 | 1.93033 | 3.00642 | 2.51142 | 1.40566 | 2.08522 | 2.20293 | 0.38326 | 0.2756714 | 3.00642 | pk | 0.2380406 | 2.511416 | pv |
| PF14_0707   | PKH_123150 | PVX_116790 | PY05083 | PBANKA_133<br>700 | PCHAS_13416<br>0 | 1.19121 | 0.5729  | 1.41141 | 0.27489 | 0.28649 | 0.37339 | 0.37346 | 0.2405445 | 1.41141 | pv | 0.276057  | 0.274894 | py |
| PF14_0709   | PKH_126820 | PVX_118585 | PY02256 | PBANKA_130<br>210 | PCHAS_13053<br>0 | 2.01566 | 3.74665 | 3.37728 | 4.11223 | 3.3247  | 3.49062 | 0.43864 | 0.2313813 | 2.01566 | pf | 0.2252175 | 3.746653 | pk |
| PF14_0711   | PKH_126840 | PVX_118595 | PY02631 | PBANKA_130<br>190 | PCHAS_13051<br>0 | 2.8375  | 2.84764 | 2.6829  | 3.45139 | 4.76572 | 4.37668 | 0.70429 | 0.4615326 | 4.76572 | pb | 0.1946553 | 4.37668  | pc |
| PF14_0713   | PKH_126860 | PVX_118605 | PY02637 | PBANKA_130<br>170 | PCHAS_13049<br>0 | 1.5813  | 2.46275 | 2.64068 | 2.62479 | 4.31764 | 1.69612 | 0.64049 | 0.3976087 | 4.31764 | pb | 0.3053537 | 1.696124 | pc |
| PF14_0714   | PKH_126870 | PVX_118610 | PY00265 | PBANKA_130<br>160 | PCHAS_13048<br>0 | 0.1304  | 4.29528 | 2.54371 | 0.10767 | 0.05595 | 5.85652 | 0.85673 | 0.5305281 | 2.54371 | pv | 0.6502314 | 0.107665 | py |
| PF14_0715   | PKH_126880 | PVX_118615 | PY00266 | PBANKA_130<br>150 | PCHAS_13047<br>0 | 1.98094 | 5.78837 | 4.42828 | 6.04547 | 2.61032 | 1.95095 | 1.30019 | 1.064758  | 4.42828 | pv | 0.783781  | 6.045471 | py |
| PF14_0716   | PKH_126890 | PVX_118620 | PY00267 | PBANKA_130<br>140 | PCHAS_13046<br>0 | 3.55011 | 3.53057 | 3.02642 | 5.3297  | 3.43177 | 3.64366 | 0.42245 | 0.147117  | 5.3297  | py | 0.1591963 | 3.431769 | pb |
| PF14_0718   | PKH_126910 | PVX_118630 | PY00705 | PBANKA_130<br>120 | PCHAS_13044<br>0 | 2.09312 | 2.15988 | 2.74413 | 5.5178  | 3.17684 | 2.39495 | 0.79847 | 0.3335931 | 5.5178  | py | 0.2215169 | 3.176844 | pb |
| PF14_0719   | PKH_126920 | PVX_118635 | PY00706 | PBANKA_130<br>110 | PCHAS_13043<br>0 | 2.38013 | 2.80478 | 2.5514  | 4.57605 | 2.85323 | 2.21214 | 0.51507 | 0.2131494 | 4.57605 | py | 0.1909786 | 2.853235 | pb |
| PF14_0720   | PKH_126930 | PVX_118640 | PY00707 | PBANKA_130<br>100 | PCHAS_13042<br>0 | 4.12774 | 2.03865 | 2.97545 | 2.45029 | 0.82564 | 2.87622 | 0.77747 | 0.5228505 | 0.82564 | pb | 0.6535632 | 2.876223 | pc |
| PF14_0721   | PKH_126940 | PVX_118645 | PY00708 | PBANKA_130<br>090 | PCHAS_13041<br>0 | 4.19346 | 2.67856 | 3.13446 | 3.34931 | 2.83092 | 3.3821  | 0.38016 | 0.244387  | 4.19346 | pf | 0.1915081 | 2.678555 | pk |
| PF14_0723   | PKH_126960 | PVX_118650 | PY05554 | PBANKA_130<br>070 | PCHAS_13039<br>0 | 4.91022 | 1.01847 | 0.61898 | 4.41701 | 0.12446 | 3.83379 | 1.24174 | 0.9753174 | 3.83379 | pc | 0.9956452 | 1.018467 | pk |
| PF14_0724   | PKH_126970 | PVX_118655 | PY05553 | PBANKA_130<br>060 | PCHAS_13038<br>0 | 1.26305 | 0.75226 | 5.3716  | 2.60074 | 2.55533 | 5.27941 | 1.2637  | 1.0815163 | 5.3716  | pv | 1.0174734 | 2.600739 | py |
| PF14_0774   | PKH_132810 | PVX_085435 | PY05717 | PBANKA_102<br>230 | PCHAS_10231<br>0 | 5.23823 | 5.25968 | 5.40036 | 0.05464 | 5.12371 | 5.06787 | 0.26134 | 0.0936909 | 0.05464 | py | 0.0884847 | 5.123714 | pb |
| PF14_0788-a | PKH_134230 | PVX_086205 | PY00993 | PBANKA_103<br>750 | PCHAS_10383<br>0 | 0.87495 | 3.80501 | 6.08156 | 5.07562 | 5.66305 | 1.37325 | 1.05874 | 0.8151791 | 3.80501 | pk | 1.0189739 | 6.08156  | pv |
| PFA0140c    | PKH_021060 | PVX_081615 | PY01437 | PBANKA_021<br>030 | PCHAS_02087<br>0 | 4.02234 | 3.39805 | 3.15535 | 4.39128 | 3.94618 | 0.89893 | 0.81791 | 0.372045  | 0.89893 | pc | 0.3537823 | 4.39128  | py |
| PFA0160c    | PKH_021010 | PVX_081595 | PY06526 | PBANKA_020<br>990 | PCHAS_02083<br>0 | 3.12809 | 2.98426 | 3.28235 | 4.29316 | 2.80432 | 0.7871  | 0.68799 | 0.3573846 | 0.7871  | pc | 0.1554637 | 4.293157 | py |
| PFA0165c    | PKH_021000 | PVX_081590 | PY03810 | PBANKA_020<br>980 | PCHAS_02082<br>0 | 1.07772 | 3.34205 | 2.47122 | 2.20825 | 2.54541 | 2.73451 | 0.47746 | 0.279419  | 1.07772 | pf | 0.1501145 | 3.342051 | pk |
| PFA0180w    | PKH_020970 | PVX_081575 | PY04834 | PBANKA_020<br>950 | PCHAS_02079<br>0 | 2.54147 | 2.71968 | 2.50775 | 2.19608 | 2.74303 | 1.72671 | 0.26227 | 0.1517772 | 1.72671 | pc | 0.1033743 | 2.196077 | py |
| PFA0195w    | PKH_020940 | PVX_081565 | PY04147 | PBANKA_020<br>920 | PCHAS_02076<br>0 | 3.6117  | 2.75119 | 2.50108 | 4.49903 | 3.07967 | 1.16696 | 0.79519 | 0.5716916 | 1.16696 | pc | 0.3597748 | 4.49903  | py |

|          |            |            |         |               |              |         |         |         |         |         |         |         |           |         |    |           |          |    |
|----------|------------|------------|---------|---------------|--------------|---------|---------|---------|---------|---------|---------|---------|-----------|---------|----|-----------|----------|----|
| PFA0205w | PKH_020920 | PVX_081555 | PY06306 | PBANKA_020900 | PCHAS_020740 | 5.44891 | 5.58359 | 5.24287 | 3.75504 | 5.83529 | 5.76681 | 0.45648 | 0.1820617 | 3.75504 | py | 0.1646532 | 5.835285 | pb |
| PFA0225w | PKH_020880 | PVX_081535 | PY01243 | PBANKA_020870 | PCHAS_020710 | 4.13123 | 4.01085 | 3.20101 | 2.78025 | 2.53394 | 3.12229 | 0.48443 | 0.3795324 | 4.13123 | pf | 0.2522753 | 4.010851 | pk |
| PFA0230c | PKH_020870 | PVX_081530 | PY01244 | PBANKA_020860 | PCHAS_020700 | 2.25244 | 3.28709 | 2.63533 | 2.68681 | 3.0698  | 2.54841 | 0.26792 | 0.1911509 | 3.28709 | pk | 0.2389386 | 2.635328 | pv |
| PFA0245w | PKH_020840 | PVX_081515 | PY07333 | PBANKA_020830 | PCHAS_020670 | 5.03185 | 1.32768 | 1.57148 | 0.79888 | 1.57664 | 2.58401 | 0.80948 | 0.4068184 | 5.03185 | pf | 0.4475736 | 1.327678 | pk |
| PFA0250w | PKH_020830 | PVX_081510 | PY07833 | PBANKA_020820 | PCHAS_020660 | 3.89439 | 3.3727  | 3.59305 | 4.9903  | 3.91622 | 4.20895 | 0.37589 | 0.2318826 | 4.9903  | py | 0.2843971 | 3.916217 | pb |
| PFA0255c | PKH_020820 | PVX_081505 | PY07834 | PBANKA_020810 | PCHAS_020650 | 3.39048 | 3.00994 | 2.71797 | 2.20618 | 2.50607 | 2.19876 | 0.3679  | 0.2645944 | 3.39048 | pf | 0.2047743 | 3.009945 | pk |
| PFA0270c | PKH_020790 | PVX_081495 | PY04768 | PBANKA_020780 | PCHAS_020620 | 3.5156  | 3.5603  | 1.87848 | 2.04592 | 3.16922 | 3.10673 | 0.53566 | 0.3846489 | 1.87848 | pv | 0.1999852 | 2.045921 | py |
| PFA0275c | PKH_020780 | PVX_081490 | PY04766 | PBANKA_020770 | PCHAS_020610 | 1.92904 | 3.70781 | 2.52951 | 2.65425 | 3.16112 | 3.06321 | 0.46989 | 0.3370347 | 1.92904 | pf | 0.2601414 | 3.707815 | pk |
| PFA0290w | PKH_020730 | PVX_081475 | PY06866 | PBANKA_020740 | PCHAS_020580 | 4.73282 | 3.81114 | 3.87013 | 5.71433 | 3.57954 | 1.75455 | 0.86201 | 0.6112946 | 1.75455 | pc | 0.3030662 | 5.714335 | py |
| PFA0295c | PKH_020720 | PVX_081470 | PY06867 | PBANKA_020730 | PCHAS_020570 | 5.05202 | 3.83404 | 4.72767 | 6.0433  | 4.74401 | 5.06594 | 0.47592 | 0.3112482 | 6.0433  | py | 0.3890603 | 4.744007 | pb |
| PFA0300c | PKH_020710 | PVX_081465 | PY05774 | PBANKA_020720 | PCHAS_020560 | 3.13717 | 3.35121 | 2.64798 | 2.60275 | 2.839   | 2.08592 | 0.33179 | 0.2475282 | 2.08592 | pc | 0.1813564 | 3.351212 | pk |
| PFA0330w | PKH_020650 | PVX_081435 | PY04551 | PBANKA_020660 | PCHAS_020500 | 1.51713 | 1.23215 | 1.98935 | 1.59826 | 0.80948 | 1.60935 | 0.27303 | 0.1698832 | 0.80948 | pb | 0.209583  | 1.609347 | pc |
| PFA0335w | PKH_020640 | PVX_081430 | PY01029 | PBANKA_020650 | PCHAS_020490 | 4.36587 | 4.88964 | 5.70294 | 5.28782 | 4.82803 | 4.62559 | 0.34349 | 0.2372008 | 5.70294 | pv | 0.1815543 | 5.287818 | py |
| PFA0350c | PKH_020610 | PVX_081415 | PY07070 | PBANKA_020620 | PCHAS_020460 | 3.49626 | 5.30084 | 3.90928 | 5.68186 | 3.62922 | 0.6154  | 1.14109 | 0.7714445 | 0.6154  | pc | 0.5211592 | 5.681861 | py |
| PFA0355w | PKH_020600 | PVX_081410 | PY06583 | PBANKA_020610 | PCHAS_020450 | 3.39964 | 3.51447 | 2.35948 | 0.44067 | 2.98269 | 3.09214 | 0.7039  | 0.3143873 | 0.44067 | py | 0.3656214 | 2.982687 | pb |
| PFA0370w | PKH_020590 | PVX_081405 | PY06584 | PBANKA_020600 | PCHAS_020440 | 4.4486  | 3.15106 | 3.86692 | 4.44194 | 4.32658 | 3.45965 | 0.45658 | 0.3127942 | 3.15106 | pk | 0.276078  | 3.866918 | pv |
| PFA0375c | PKH_020580 | PVX_081400 | PY03953 | PBANKA_020590 | PCHAS_020430 | 0.6616  | 0.86223 | 1.65784 | 5.75258 | 5.86709 | 0.52235 | 0.601   | 0.4941062 | 1.65784 | pv | 0.3543953 | 5.752583 | py |
| PFA0400c | PKH_020530 | PVX_081375 | PY06176 | PBANKA_020540 | PCHAS_020380 | 3.77648 | 3.60846 | 3.41087 | 4.86288 | 3.36509 | 3.70936 | 0.32738 | 0.1419763 | 4.86288 | py | 0.1166284 | 3.365094 | pb |
| PFA0405w | PKH_020520 | PVX_081370 | PY06175 | PBANKA_020530 | PCHAS_020370 | 3.80223 | 2.83911 | 4.09018 | 2.58958 | 3.16972 | 2.6568  | 0.49611 | 0.3451141 | 4.09018 | pv | 0.3690099 | 2.589582 | py |
| PFA0420w | PKH_020490 | PVX_081355 | PY00631 | PBANKA_020500 | PCHAS_020340 | 0.56683 | 0.50423 | 6.1519  | 5.95754 | 6.25047 | 0.31388 | 0.31243 | 0.2470135 | 5.95754 | py | 0.2221169 | 6.25047  | pb |
| PFA0440w | PKH_020450 | PVX_081335 | PY05079 | PBANKA_020460 | PCHAS_020300 | 6.03059 | 0.0054  | 6.04348 | 5.68536 | 5.96395 | 5.90402 | 0.13489 | 0.096937  | 0.0054  | pk | 0.1012887 | 6.043479 | pv |
| PFA0445w | PKH_020440 | PVX_081330 | PY06758 | PBANKA_020450 | PCHAS_020290 | 6.19135 | 3.26325 | 0.61451 | 0.10715 | 0.55107 | 2.74246 | 1.00897 | 0.6683292 | 3.26325 | pk | 0.819551  | 0.614514 | pv |

|          |            |            |         |               |              |         |         |         |         |         |         |         |           |         |    |           |          |    |
|----------|------------|------------|---------|---------------|--------------|---------|---------|---------|---------|---------|---------|---------|-----------|---------|----|-----------|----------|----|
| PFA0460c | PKH_020410 | PVX_081315 | PY03059 | PBANKA_020420 | PCHAS_020260 | 3.75727 | 3.31137 | 5.88247 | 4.76929 | 4.21697 | 4.01048 | 0.6316  | 0.3835253 | 5.88247 | pv | 0.2897039 | 4.76929  | py |
| PFA0465c | PKH_020400 | PVX_081310 | PY01428 | PBANKA_020410 | PCHAS_020250 | 2.39736 | 2.59255 | 1.61056 | 3.46475 | 2.06525 | 3.25952 | 0.54061 | 0.4523326 | 1.61056 | pv | 0.3473649 | 3.464753 | py |
| PFA0495c | PKH_020340 | PVX_081285 | PY00420 | PBANKA_020350 | PCHAS_020190 | 2.53323 | 2.60423 | 3.22722 | 4.17056 | 1.66202 | 2.79125 | 0.56492 | 0.3646426 | 4.17056 | py | 0.2202526 | 1.662024 | pb |
| PFA0500w | PKH_020330 | PVX_081280 | PY00421 | PBANKA_020340 | PCHAS_020180 | 2.82856 | 3.39071 | 2.50849 | 5.41544 | 3.42731 | 2.63268 | 0.71062 | 0.33537   | 5.41544 | py | 0.2695234 | 3.427312 | pb |
| PFA0510w | PKH_020310 | PVX_081275 | PY00423 | PBANKA_020320 | PCHAS_020160 | 3.17869 | 3.59024 | 2.29554 | 2.88222 | 0.5455  | 2.18334 | 0.77113 | 0.4580107 | 0.5455  | pb | 0.3977931 | 2.183338 | pc |
| PFA0515w | PKH_020300 | PVX_081270 | PY02398 | PBANKA_020310 | PCHAS_020150 | 0.86952 | 0.13673 | 0.40949 | 0.3088  | 3.67949 | 1.5979  | 0.83918 | 0.4043766 | 3.67949 | pb | 0.2083702 | 1.597897 | pc |
| PFA0520c | PKH_020290 | PVX_081265 | PY02400 | PBANKA_020300 | PCHAS_020140 | 3.66474 | 3.15636 | 4.08372 | 4.61692 | 4.37969 | 4.09366 | 0.36424 | 0.2496287 | 3.15636 | pk | 0.3095496 | 4.083715 | pv |
| PFA0530c | PKH_020220 | PVX_081255 | PY07323 | PBANKA_020280 | PCHAS_020120 | 2.19514 | 2.89568 | 2.71177 | 0.08102 | 3.25471 | 1.29946 | 0.88109 | 0.5311576 | 0.08102 | py | 0.5282105 | 3.254712 | pb |
| PFA0535c | PKH_020210 | PVX_081250 | PY02372 | PBANKA_020270 | PCHAS_020110 | 4.95391 | 5.41341 | 5.83233 | 6.05936 | 2.46    | 1.73854 | 1.1041  | 0.7427523 | 2.46    | pb | 0.3810921 | 1.738536 | pc |
| PFA0540c | PKH_020200 | PVX_081245 | PY04376 | PBANKA_020260 | PCHAS_020100 | 3.99901 | 3.57965 | 3.46574 | 4.79399 | 2.95477 | 3.64444 | 0.40621 | 0.2445856 | 4.79399 | py | 0.1495107 | 2.954769 | pb |
| PFA0545c | PKH_020190 | PVX_081240 | PY04378 | PBANKA_020250 | PCHAS_020090 | 3.92421 | 4.01095 | 4.84481 | 3.9948  | 4.45651 | 4.85312 | 0.37075 | 0.2764637 | 4.85312 | pc | 0.1371134 | 4.844813 | pv |
| PFA0550w | PKH_020180 | PVX_081235 | PY05597 | PBANKA_020240 | PCHAS_020080 | 3.89034 | 5.84123 | 4.91237 | 5.54344 | 4.82806 | 4.52426 | 0.50906 | 0.4064691 | 3.89034 | pf | 0.2758717 | 5.841227 | pk |
| PFA0555c | PKH_020170 | PVX_081230 | PY05596 | PBANKA_020230 | PCHAS_020070 | 4.85061 | 3.01189 | 2.67141 | 1.68052 | 2.60341 | 3.04275 | 0.65832 | 0.3541428 | 4.85061 | pf | 0.357558  | 3.011894 | pk |
| PFA0580c | PKH_020130 | PVX_081205 | PY01446 | PBANKA_020180 | PCHAS_020020 | 2.58755 | 3.18924 | 2.60525 | 4.74709 | 2.87114 | 2.48536 | 0.52155 | 0.1974936 | 4.74709 | py | 0.1803936 | 2.871142 | pb |
| PFB0130w | PKH_041710 | PVX_003575 | PY00446 | PBANKA_030080 | PCHAS_030300 | 3.58602 | 4.53552 | 4.49946 | 5.44907 | 4.02341 | 3.35246 | 0.58702 | 0.4192981 | 5.44907 | py | 0.5241226 | 4.023412 | pb |
| PFB0160w | PKH_041660 | PVX_003600 | PY06905 | PBANKA_030120 | PCHAS_030340 | 2.60274 | 3.4584  | 3.0653  | 0.53193 | 4.57029 | 4.2398  | 1.01142 | 0.6284113 | 0.53193 | py | 0.50754   | 4.570295 | pb |
| PFB0170w | PKH_041640 | PVX_003610 | PY01530 | PBANKA_030140 | PCHAS_030360 | 4.31771 | 4.59407 | 5.59031 | 5.56062 | 5.10641 | 3.51213 | 0.63891 | 0.4478299 | 3.51213 | pc | 0.438811  | 5.590315 | pv |
| PFB0175c | PKH_041630 | PVX_003615 | PY01531 | PBANKA_030150 | PCHAS_030370 | 1.54666 | 1.69833 | 2.06694 | 0.47619 | 0.53421 | 1.55463 | 0.46048 | 0.3368821 | 0.47619 | py | 0.1659959 | 0.534206 | pb |
| PFB0180w | PKH_041610 | PVX_003625 | PY01683 | PBANKA_030170 | PCHAS_030390 | 3.27485 | 4.01431 | 0.47995 | 5.02675 | 3.3611  | 3.56272 | 0.91465 | 0.4810216 | 0.47995 | pv | 0.2352711 | 5.026748 | py |
| PFB0190c | PKH_041590 | PVX_003635 | PY03271 | PBANKA_030190 | PCHAS_030410 | 5.26868 | 5.68673 | 5.40721 | 0.86778 | 5.57464 | 2.92932 | 0.80119 | 0.4323601 | 2.92932 | pc | 0.1463707 | 0.867776 | py |
| PFB0194w | PKH_041580 | PVX_003640 | PY00894 | PBANKA_030200 | PCHAS_030420 | 6.23566 | 1.90757 | 1.56054 | 5.97639 | 6.05008 | 4.55798 | 0.94761 | 0.8016014 | 4.55798 | pc | 0.5132265 | 1.907571 | pk |
| PFB0210c | PKH_041510 | PVX_003665 | PY00899 | PBANKA_030250 | PCHAS_030470 | 2.28796 | 1.96914 | 2.30045 | 3.69572 | 3.35651 | 3.83912 | 0.7223  | 0.5892845 | 1.96914 | pk | 0.4725897 | 2.300451 | pv |



|            |            |            |         |               |              |         |         |         |         |         |         |         |           |         |    |           |          |    |
|------------|------------|------------|---------|---------------|--------------|---------|---------|---------|---------|---------|---------|---------|-----------|---------|----|-----------|----------|----|
| PFB0240w   | PKH_041440 | PVX_003700 | PY02526 | PBANKA_030310 | PCHAS_030530 | 2.0178  | 2.95205 | 2.75094 | 3.71538 | 2.33809 | 2.85649 | 0.40285 | 0.2905294 | 3.71538 | py | 0.2599498 | 2.338094 | pb |
| PFB0255w-a | PKH_041410 | PVX_003720 | PY01125 | PBANKA_030340 | PCHAS_030560 | 1.36628 | 3.22809 | 2.3166  | 4.7253  | 4.26278 | 1.88097 | 1.10872 | 0.8487262 | 4.7253  | py | 0.5743623 | 4.262784 | pb |
| PFB0260w   | PKH_041390 | PVX_003730 | PY01123 | PBANKA_030360 | PCHAS_030580 | 3.92136 | 3.64953 | 3.59676 | 5.39863 | 1.56908 | 3.60005 | 0.7006  | 0.4246366 | 1.56908 | pb | 0.5184258 | 3.600051 | pc |
| PFB0265c   | PKH_041380 | PVX_003735 | PY01122 | PBANKA_030370 | PCHAS_030590 | 5.99501 | 0.69578 | 6.06892 | 3.53546 | 4.01367 | 5.7963  | 0.94958 | 0.6475832 | 3.53546 | py | 0.3141437 | 4.013665 | pb |
| PFB0270w   | PKH_041370 | PVX_003740 | PY05037 | PBANKA_030380 | PCHAS_030600 | 0.91267 | 3.00883 | 4.01896 | 5.49639 | 4.9748  | 2.2885  | 1.38002 | 1.0347719 | 0.91267 | pf | 1.0409316 | 3.008829 | pk |
| PFB0280w   | PKH_041350 | PVX_003750 | PY05041 | PBANKA_030400 | PCHAS_030620 | 2.10991 | 2.60576 | 2.85877 | 1.16308 | 2.55464 | 1.84009 | 0.48435 | 0.3029052 | 1.16308 | py | 0.3786315 | 2.55464  | pb |
| PFB0285c   | PKH_041340 | PVX_003755 | PY00070 | PBANKA_030410 | PCHAS_030630 | 1.35331 | 1.22187 | 5.98984 | 4.63081 | 0.7386  | 1.125   | 0.81788 | 0.4259844 | 4.63081 | py | 0.4358782 | 0.738596 | pb |
| PFB0290c   | PKH_041330 | PVX_003760 | PY00068 | PBANKA_030420 | PCHAS_030640 | 1.67906 | 2.54622 | 1.78756 | 0.59335 | 1.5323  | 1.2173  | 0.44498 | 0.3311944 | 2.54622 | pk | 0.3501777 | 1.787556 | pv |
| PFB0295w   | PKH_041320 | PVX_003765 | PY05969 | PBANKA_030430 | PCHAS_030650 | 1.64843 | 2.15851 | 1.8512  | 4.83928 | 0.60584 | 0.90071 | 0.93258 | 0.5006334 | 4.83928 | py | 0.365145  | 0.605839 | pb |
| PFB0320c   | PKH_041280 | PVX_003785 | PY02064 | PBANKA_030460 | PCHAS_030680 | 5.93029 | 2.76828 | 2.18238 | 5.65722 | 2.54743 | 4.64124 | 1.4483  | 1.1137291 | 5.93029 | pf | 1.3921614 | 2.768278 | pk |
| PFB0370c   | PKH_041180 | PVX_003860 | PY03494 | PBANKA_030530 | PCHAS_030750 | 1.69183 | 0.92723 | 2.4688  | 1.32066 | 0.75138 | 1.02138 | 0.46355 | 0.2667758 | 2.4688  | pv | 0.2586496 | 1.320662 | py |
| PFB0375w   | PKH_041170 | PVX_003865 | PY03493 | PBANKA_030540 | PCHAS_030760 | 1.59446 | 1.92833 | 2.05986 | 1.73304 | 1.75052 | 1.34587 | 0.17755 | 0.1321359 | 1.34587 | pc | 0.0878343 | 2.059858 | pv |
| PFB0380c   | PKH_041160 | PVX_003870 | PY03492 | PBANKA_030550 | PCHAS_030770 | 3.81137 | 3.47222 | 2.39531 | 0.9627  | 2.31285 | 3.09322 | 0.78432 | 0.5150857 | 0.9627  | py | 0.4487652 | 2.312852 | pb |
| PFB0390w   | PKH_041140 | PVX_003885 | PY04778 | PBANKA_030570 | PCHAS_030790 | 3.92227 | 1.64518 | 2.75865 | 2.46021 | 4.15193 | 2.46915 | 0.70972 | 0.6289695 | 1.64518 | pk | 0.7862119 | 2.758646 | pv |
| PFB0410c   | PKH_041090 | PVX_003910 | PY02960 | PBANKA_030620 | PCHAS_030840 | 1.06229 | 5.69757 | 3.32757 | 6.04981 | 0.07232 | 6.21768 | 0.80729 | 0.3907211 | 3.32757 | pv | 0.4464343 | 6.04981  | py |
| PFB0415c   | PKH_041080 | PVX_003915 | PY00320 | PBANKA_030630 | PCHAS_030850 | 2.00726 | 2.08791 | 2.20021 | 4.82207 | 3.47886 | 2.32628 | 0.72197 | 0.3419932 | 4.82207 | py | 0.1078298 | 3.47886  | pb |
| PFB0420w   | PKH_041070 | PVX_003920 | PY00321 | PBANKA_030640 | PCHAS_030860 | 3.33269 | 3.62944 | 1.62633 | 4.90484 | 3.17778 | 3.22741 | 0.63924 | 0.4258192 | 1.62633 | pv | 0.1392359 | 4.90484  | py |
| PFB0435c   | PKH_041040 | PVX_003935 | PY00325 | PBANKA_030670 | PCHAS_030890 | 5.22288 | 4.58782 | 4.81485 | 4.72338 | 5.65345 | 5.35895 | 0.35154 | 0.254125  | 5.65345 | pb | 0.1816322 | 5.358948 | pc |
| PFB0450w   | PKH_041010 | PVX_003950 | PY07642 | PBANKA_030690 | PCHAS_030910 | 2.92915 | 6.22502 | 5.84393 | 4.22148 | 4.17483 | 4.15158 | 0.83915 | 0.7485091 | 2.92915 | pf | 0.4347524 | 6.225021 | pk |
| PFB0460c   | PKH_040990 | PVX_003960 | PY06445 | PBANKA_030710 | PCHAS_030930 | 4.17206 | 4.67033 | 4.92764 | 2.5985  | 5.0615  | 4.38678 | 0.58369 | 0.2860587 | 2.5985  | py | 0.2597821 | 5.061496 | pb |
| PFB0465c   | PKH_040980 | PVX_003965 | PY00444 | PBANKA_030720 | PCHAS_030940 | 3.83291 | 2.99161 | 3.09484 | 5.1559  | 5.57567 | 4.47158 | 0.88063 | 0.7082058 | 5.57567 | pb | 0.7255893 | 4.47158  | pc |
| PFB0475c   | PKH_040950 | PVX_003980 | PY00441 | PBANKA_030750 | PCHAS_030970 | 6.00795 | 6.07488 | 5.81719 | 5.36864 | 5.65288 | 0.50128 | 0.3381  | 0.2122608 | 0.50128 | pc | 0.1531874 | 5.368639 | py |

|          |            |            |         |               |              |         |         |         |         |         |         |         |           |         |    |           |          |    |
|----------|------------|------------|---------|---------------|--------------|---------|---------|---------|---------|---------|---------|---------|-----------|---------|----|-----------|----------|----|
| PFB0495w | PKH_040910 | PVX_002975 | PY05091 | PBANKA_030790 | PCHAS_031010 | 1.87408 | 3.34288 | 2.45063 | 1.93149 | 2.09424 | 2.24556 | 0.35654 | 0.1781233 | 3.34288 | pk | 0.1335566 | 2.450635 | pv |
| PFB0510w | PKH_040870 | PVX_002955 | PY04596 | PBANKA_030830 | PCHAS_031050 | 5.26796 | 5.39319 | 5.10522 | 4.9552  | 4.90215 | 4.10843 | 0.3001  | 0.1607578 | 4.10843 | pc | 0.1289536 | 5.393192 | pk |
| PFB0545c | PKH_040800 | PVX_002920 | PY03559 | PBANKA_030900 | PCHAS_031120 | 2.74408 | 2.83745 | 3.34828 | 5.57487 | 3.63061 | 2.70842 | 0.71064 | 0.305279  | 5.57487 | py | 0.1833082 | 3.630608 | pb |
| PFB0550w | PKH_040790 | PVX_002915 | PY03558 | PBANKA_030910 | PCHAS_031130 | 2.40579 | 1.35618 | 1.19548 | 3.35114 | 1.20623 | 1.09958 | 0.60197 | 0.2933817 | 3.35114 | py | 0.3667272 | 1.206226 | pb |
| PFB0570w | PKH_040760 | PVX_002900 | PY02991 | PBANKA_030950 | PCHAS_031160 | 6.01011 | 6.18225 | 0.78733 | 5.62008 | 5.88945 | 5.83652 | 0.31947 | 0.147154  | 0.78733 | pv | 0.1166006 | 5.620078 | py |
| PFB0575c | PKH_040750 | PVX_002895 | PY02990 | PBANKA_030960 | PCHAS_031170 | 2.46767 | 3.63031 | 2.94881 | 4.92935 | 3.49043 | 3.53308 | 0.53097 | 0.3493809 | 4.92935 | py | 0.4367262 | 3.490432 | pb |
| PFB0580w | PKH_040740 | PVX_002890 | PY02989 | PBANKA_030970 | PCHAS_031180 | 3.11502 | 2.76489 | 3.33313 | 2.7721  | 2.93696 | 5.24647 | 0.53678 | 0.1822298 | 5.24647 | pc | 0.1287447 | 3.333126 | pv |
| PFB0585w | PKH_040730 | PVX_002885 | PY02988 | PBANKA_030980 | PCHAS_031190 | 5.05064 | 5.41733 | 4.26447 | 3.777   | 3.26254 | 3.87071 | 0.63703 | 0.4551144 | 5.41733 | pk | 0.4704535 | 4.26447  | pv |
| PFB0595w | PKH_040690 | PVX_002875 | PY02986 | PBANKA_031000 | PCHAS_031210 | 2.73346 | 2.34406 | 2.20128 | 1.86571 | 2.60531 | 2.15133 | 0.24408 | 0.1972324 | 1.86571 | py | 0.1812267 | 2.605313 | pb |
| PFB0605w | PKH_040670 | PVX_002865 | PY02983 | PBANKA_031030 | PCHAS_031240 | 3.70437 | 0.36633 | 4.1397  | 5.30514 | 3.90432 | 2.60264 | 0.9805  | 0.627566  | 0.36633 | pk | 0.7256128 | 4.139698 | pv |
| PFB0610c | PKH_040660 | PVX_002860 | PY02982 | PBANKA_031040 | PCHAS_031250 | 2.6618  | 3.05026 | 3.30888 | 4.91564 | 2.21002 | 2.43374 | 0.66154 | 0.3430757 | 4.91564 | py | 0.3158992 | 2.210021 | pb |
| PFB0630c | PKH_040600 | PVX_002840 | PY03933 | PBANKA_031080 | PCHAS_031290 | 1.68813 | 1.96831 | 2.10843 | 2.39055 | 2.77134 | 2.00175 | 0.26869 | 0.1685055 | 2.77134 | pb | 0.2106318 | 2.001745 | pc |
| PFB0635w | PKH_040590 | PVX_002835 | PY03932 | PBANKA_031090 | PCHAS_031300 | 2.33116 | 2.76663 | 2.47506 | 2.7881  | 3.0215  | 2.59541 | 0.19577 | 0.1497009 | 3.0215  | pb | 0.1871262 | 2.595411 | pc |
| PFB0640c | PKH_040580 | PVX_002830 | PY03930 | PBANKA_031100 | PCHAS_031310 | 0.00704 | 5.53852 | 3.10592 | 2.75995 | 1.12172 | 3.04871 | 1.30074 | 0.9525546 | 0.00704 | pf | 0.5682398 | 5.53852  | pk |
| PFB0655c | PKH_040550 | PVX_002815 | PY03137 | PBANKA_031120 | PCHAS_031330 | 1.46821 | 0.88    | 1.64497 | 1.64943 | 0.68299 | 1.83853 | 0.35029 | 0.2279517 | 0.68299 | pb | 0.2365499 | 1.838534 | pc |
| PFB0660w | PKH_040540 | PVX_002810 | PY03305 | PBANKA_031130 | PCHAS_031340 | 1.72165 | 1.58427 | 1.62491 | 4.32344 | 0.68581 | 0.97286 | 0.73784 | 0.3375786 | 4.32344 | py | 0.1973575 | 0.685809 | pb |
| PFB0665w | PKH_040530 | PVX_002805 | PY03306 | PBANKA_031140 | PCHAS_031350 | 6.1568  | 0.3914  | 0.37242 | 5.45153 | 6.03829 | 6.03888 | 0.32638 | 0.2506063 | 5.45153 | py | 0.2836293 | 6.038287 | pb |
| PFB0675w | PKH_040510 | PVX_002795 | PY05194 | PBANKA_031160 | PCHAS_031370 | 0.39757 | 0.24968 | 5.91791 | 1.37898 | 1.44366 | 1.24236 | 0.6305  | 0.4350779 | 5.91791 | pv | 0.5096922 | 1.378981 | py |
| PFB0690w | PKH_040470 | PVX_002775 | PY00196 | PBANKA_031200 | PCHAS_031410 | 0.90023 | 3.05297 | 5.59569 | 0.59474 | 0.38004 | 3.07659 | 1.12375 | 0.8521288 | 3.07659 | pc | 0.4506043 | 3.052965 | pk |
| PFB0700c | PKH_040460 | PVX_002770 | PY00195 | PBANKA_031210 | PCHAS_031420 | 1.26956 | 1.95395 | 2.15418 | 5.16321 | 5.61554 | 1.22859 | 0.98946 | 0.7094387 | 5.16321 | py | 0.4024978 | 5.615543 | pb |
| PFB0705w | PKH_040450 | PVX_002765 | PY01112 | PBANKA_031220 | PCHAS_031430 | 1.1806  | 1.69663 | 1.85756 | 0.26795 | 1.02804 | 4.8089  | 0.81885 | 0.4516418 | 4.8089  | pc | 0.3363884 | 0.267947 | py |
| PFB0710c | PKH_040440 | PVX_002760 | PY01113 | PBANKA_031230 | PCHAS_031440 | 1.88432 | 3.29284 | 5.78248 | 1.96877 | 3.97784 | 5.42076 | 1.33919 | 1.1091011 | 5.78248 | pv | 1.0553598 | 1.968775 | py |



|          |            |            |         |                   |                  |         |         |         |         |         |         |         |           |         |    |           |          |    |
|----------|------------|------------|---------|-------------------|------------------|---------|---------|---------|---------|---------|---------|---------|-----------|---------|----|-----------|----------|----|
| PFB0715w | PKH_040430 | PVX_002755 | PY01115 | PBANKA_031<br>240 | PCHAS_03145<br>0 | 2.4075  | 1.55227 | 2.85061 | 2.69517 | 1.43205 | 1.87456 | 0.51573 | 0.4236699 | 2.85061 | pv | 0.3244339 | 2.695169 | py |
| PFB0720c | PKH_040420 | PVX_002750 | PY01116 | PBANKA_031<br>250 | PCHAS_03146<br>0 | 3.92339 | 3.40561 | 5.32542 | 5.31091 | 0.43376 | 5.07823 | 0.82434 | 0.661467  | 0.43376 | pb | 0.8268337 | 5.07823  | pc |
| PFB0732c | PKH_040395 | PVX_002735 | PY01119 | PBANKA_031<br>280 | PCHAS_03149<br>0 | 2.55302 | 3.08458 | 2.81852 | 2.20469 | 3.08223 | 2.4248  | 0.30047 | 0.2377977 | 2.20469 | py | 0.2313208 | 3.082226 | pb |
| PFB0760w | PKH_040350 | PVX_002710 | PY01249 | PBANKA_031<br>330 | PCHAS_03154<br>0 | 6.1636  | 0.33075 | 5.09236 | 3.03276 | 5.43681 | 4.81095 | 0.87971 | 0.5748446 | 3.03276 | py | 0.7185557 | 5.436808 | pb |
| PFB0795w | PKH_040300 | PVX_002685 | PY05971 | PBANKA_031<br>380 | PCHAS_03159<br>0 | 4.29081 | 3.33614 | 3.8258  | 4.86348 | 4.01582 | 4.28611 | 0.37711 | 0.2625337 | 3.33614 | pk | 0.2130905 | 3.8258   | pv |
| PFB0800c | PKH_040290 | PVX_002680 | PY05970 | PBANKA_031<br>390 | PCHAS_03160<br>0 | 3.27029 | 2.8825  | 2.01427 | 0.93436 | 3.78267 | 1.6215  | 0.89422 | 0.6834346 | 0.93436 | py | 0.629251  | 3.782666 | pb |
| PFB0815w | PKH_040260 | PVX_002665 | PY06527 | PBANKA_031<br>420 | PCHAS_03163<br>0 | 5.58804 | 0.26758 | 6.13756 | 4.2577  | 5.45892 | 5.12888 | 0.57181 | 0.4201073 | 4.2577  | py | 0.492853  | 5.458915 | pb |
| PFB0820c | PKH_040250 | PVX_002660 | PY06528 | PBANKA_031<br>430 | PCHAS_03164<br>0 | 3.09113 | 2.8541  | 2.51856 | 5.53413 | 6.05447 | 2.54821 | 1.10688 | 0.7116972 | 6.05447 | pb | 0.8131507 | 2.548215 | pc |
| PFB0830w | PKH_040230 | PVX_002650 | PY04712 | PBANKA_031<br>450 | PCHAS_03166<br>0 | 2.40342 | 1.58692 | 2.65038 | 1.48147 | 2.69374 | 2.06625 | 0.43548 | 0.3381908 | 1.48147 | py | 0.3501598 | 2.69374  | pb |
| PFB0840w | PKH_040210 | PVX_002640 | PY03797 | PBANKA_031<br>470 | PCHAS_03168<br>0 | 3.9289  | 3.83164 | 2.83854 | 5.38897 | 4.57247 | 4.63909 | 0.66691 | 0.4535024 | 2.83854 | pv | 0.3627529 | 5.388968 | py |
| PFB0855c | PKH_040180 | PVX_002625 | PY01246 | PBANKA_031<br>500 | PCHAS_03171<br>0 | 3.58911 | 3.90836 | 4.03386 | 0.43792 | 2.99418 | 5.54273 | 0.96768 | 0.5986606 | 0.43792 | py | 0.5197807 | 2.994177 | pb |
| PFB0865w | PKH_040160 | PVX_002615 | PY01248 | PBANKA_031<br>520 | PCHAS_03173<br>0 | 2.39958 | 2.73566 | 2.61038 | 0.58614 | 3.20061 | 2.86076 | 0.53349 | 0.2102817 | 0.58614 | py | 0.1466133 | 3.20061  | pb |
| PFB0875c | PKH_040140 | PVX_002605 | PY04746 | PBANKA_031<br>540 | PCHAS_03175<br>0 | 1.47311 | 2.05525 | 1.11693 | 2.13573 | 0.49383 | 1.51207 | 0.43653 | 0.3201861 | 0.49383 | pb | 0.4002326 | 1.512069 | pc |
| PFB0890c | PKH_040090 | PVX_002580 | PY04495 | PBANKA_031<br>590 | PCHAS_03180<br>0 | 4.2258  | 3.5324  | 2.77743 | 3.10208 | 3.34419 | 2.71076 | 0.41869 | 0.2776799 | 4.2258  | pf | 0.2395216 | 3.532396 | pk |
| PFB0895c | PKH_040080 | PVX_002575 | PY04496 | PBANKA_031<br>600 | PCHAS_03181<br>0 | 3.9445  | 4.2001  | 3.65344 | 2.90953 | 4.43084 | 4.66168 | 0.46419 | 0.2989173 | 2.90953 | py | 0.3159608 | 4.430843 | pb |
| PFC0100c | PKH_083780 | PVX_119245 | PY07385 | PBANKA_040<br>100 | PCHAS_04019<br>0 | 1.65315 | 3.19059 | 2.05542 | 2.92097 | 1.45228 | 4.40863 | 0.89322 | 0.6012253 | 4.40863 | pc | 0.6007477 | 1.45228  | pb |
| PFC0105w | PKH_083770 | PVX_119250 | PY06573 | PBANKA_040<br>110 | PCHAS_04020<br>0 | 2.19976 | 3.01361 | 4.26143 | 2.49955 | 1.29128 | 1.76234 | 0.75353 | 0.4919089 | 4.26143 | pv | 0.539938  | 2.499554 | py |
| PFC0126c | PKH_083750 | PVX_119260 | PY03962 | PBANKA_040<br>130 | PCHAS_04022<br>0 | 3.90541 | 3.31313 | 2.79086 | 4.23148 | 3.3764  | 4.05464 | 0.45186 | 0.3193192 | 2.79086 | pv | 0.3176309 | 4.231485 | py |
| PFC0130c | PKH_083740 | PVX_119265 | PY03963 | PBANKA_040<br>140 | PCHAS_04023<br>0 | 1.18658 | 2.48788 | 1.03156 | 2.81689 | 2.16305 | 0.84843 | 0.73354 | 0.5541869 | 2.81689 | py | 0.4486169 | 2.16305  | pb |
| PFC0135c | PKH_083730 | PVX_119270 | PY01601 | PBANKA_040<br>150 | PCHAS_04024<br>0 | 3.16437 | 4.42941 | 3.38878 | 3.03878 | 3.73712 | 3.26145 | 0.34845 | 0.1845502 | 4.42941 | pk | 0.1988559 | 3.388777 | pv |
| PFC0140c | PKH_083720 | PVX_119275 | PY05628 | PBANKA_040<br>160 | PCHAS_04025<br>0 | 2.98944 | 4.64914 | 2.88594 | 2.40659 | 2.17483 | 2.28598 | 0.60952 | 0.2829143 | 4.64914 | pk | 0.2338038 | 2.885943 | pv |
| PFC0150w | PKH_083700 | PVX_119285 | PY01351 | PBANKA_040<br>180 | PCHAS_04027<br>0 | 5.30239 | 6.00522 | 4.61346 | 1.63188 | 3.60128 | 2.75339 | 1.32242 | 0.9905863 | 1.63188 | py | 0.9851881 | 3.601283 | pb |

|          |            |            |         |               |              |         |         |         |         |         |         |         |           |         |    |           |          |    |
|----------|------------|------------|---------|---------------|--------------|---------|---------|---------|---------|---------|---------|---------|-----------|---------|----|-----------|----------|----|
| PFC0155c | PKH_083690 | PVX_119290 | PY01352 | PBANKA_040190 | PCHAS_040280 | 1.99757 | 0.45446 | 2.27133 | 2.00665 | 1.60141 | 4.57029 | 0.79914 | 0.4444214 | 4.57029 | pc | 0.1697485 | 0.454458 | pk |
| PFC0160w | PKH_083680 | PVX_119295 | PY07037 | PBANKA_040200 | PCHAS_040290 | 5.10514 | 5.04606 | 5.27667 | 4.98516 | 4.59028 | 5.51329 | 0.21227 | 0.1517465 | 4.59028 | pb | 0.0876472 | 5.513288 | pc |
| PFC0166w | PKH_083660 | PVX_119305 | PY00502 | PBANKA_040220 | PCHAS_040310 | 2.54164 | 3.62872 | 3.52539 | 5.56693 | 2.44323 | 3.22999 | 0.75103 | 0.4338462 | 5.56693 | py | 0.3456182 | 2.443233 | pb |
| PFC0170c | PKH_083650 | PVX_119310 | PY00503 | PBANKA_040230 | PCHAS_040320 | 3.83722 | 2.39866 | 3.42626 | 5.20104 | 4.64443 | 3.79112 | 0.67778 | 0.5256191 | 2.39866 | pk | 0.5542846 | 3.426261 | pv |
| PFC0175w | PKH_083640 | PVX_119315 | PY00504 | PBANKA_040240 | PCHAS_040330 | 3.06661 | 3.68544 | 3.68321 | 5.35728 | 0.10775 | 3.83762 | 0.85843 | 0.4890183 | 0.10775 | pb | 0.5732257 | 3.837625 | pc |
| PFC0176c | PKH_083630 | PVX_119320 | PY00505 | PBANKA_040250 | PCHAS_040340 | 5.23353 | 3.15113 | 0.27012 | 5.73344 | 6.19919 | 4.0919  | 1.00156 | 0.6854155 | 3.15113 | pk | 0.6518028 | 0.270125 | pv |
| PFC0185w | PKH_083610 | PVX_119330 | PY03527 | PBANKA_040270 | PCHAS_040360 | 6.07396 | 5.95492 | 0.52998 | 5.98744 | 0.3126  | 5.76625 | 0.29572 | 0.1897148 | 0.52998 | pv | 0.2371435 | 5.987438 | py |
| PFC0190c | PKH_083600 | PVX_119335 | PY03528 | PBANKA_040280 | PCHAS_040370 | 0.5096  | 0.27655 | 1.20852 | 2.42155 | 0.33688 | 5.61593 | 0.69891 | 0.4217632 | 2.42155 | py | 0.527204  | 0.336875 | pb |
| PFC0195w | PKH_083590 | PVX_119340 | PY03529 | PBANKA_040290 | PCHAS_040380 | 4.23606 | 2.5564  | 2.81231 | 2.26891 | 1.59165 | 2.66902 | 0.55007 | 0.3241545 | 4.23606 | pf | 0.4051932 | 2.556403 | pk |
| PFC0225c | PKH_083520 | PVX_119375 | PY07445 | PBANKA_040350 | PCHAS_040440 | 3.81691 | 2.98952 | 3.17652 | 2.69975 | 3.68089 | 1.96791 | 0.50286 | 0.3617047 | 1.96791 | pc | 0.2920341 | 3.816912 | pf |
| PFC0250c | PKH_083430 | PVX_119405 | PY02645 | PBANKA_040410 | PCHAS_040500 | 4.60786 | 5.60634 | 4.56974 | 5.03967 | 4.81425 | 5.07458 | 0.28813 | 0.1873318 | 5.60634 | pk | 0.1730377 | 4.569739 | pv |
| PFC0255c | PKH_083420 | PVX_119410 | PY05886 | PBANKA_040420 | PCHAS_040510 | 3.49311 | 4.4735  | 3.05874 | 4.40985 | 3.81023 | 1.99884 | 0.69048 | 0.4663011 | 1.99884 | pc | 0.4170596 | 4.473501 | pk |
| PFC0262c | PKH_083390 | PVX_119425 | PY05888 | PBANKA_040440 | PCHAS_040530 | 4.77253 | 4.0371  | 5.36091 | 5.76602 | 4.33563 | 4.38087 | 0.52431 | 0.3521411 | 5.76602 | py | 0.4288671 | 4.335633 | pb |
| PFC0265c | PKH_083380 | PVX_119430 | PY07420 | PBANKA_040450 | PCHAS_040540 | 2.32328 | 0.81432 | 5.16363 | 2.28839 | 2.34226 | 5.68588 | 1.22063 | 0.8897052 | 5.16363 | pv | 1.1121315 | 2.288389 | py |
| PFC0271c | PKH_083360 | PVX_119440 | PY05305 | PBANKA_040470 | PCHAS_040560 | 2.79832 | 3.6631  | 2.45829 | 5.89625 | 3.67723 | 3.26774 | 0.78537 | 0.4167429 | 5.89625 | py | 0.4185566 | 3.677228 | pb |
| PFC0275w | PKH_083350 | PVX_119445 | PY05303 | PBANKA_040480 | PCHAS_040570 | 4.71842 | 2.03679 | 5.05992 | 5.08903 | 4.50603 | 4.21183 | 0.68545 | 0.2862173 | 2.03679 | pk | 0.2723968 | 5.059916 | pv |
| PFC0280c | PKH_083340 | PVX_119450 | PY01192 | PBANKA_040490 | PCHAS_040580 | 4.87981 | 5.97454 | 4.11303 | 4.54997 | 3.72814 | 4.74564 | 0.53481 | 0.356857  | 5.97454 | pk | 0.3368354 | 4.113027 | pv |
| PFC0281w | PKH_083330 | PVX_119455 | PY01193 | PBANKA_040500 | PCHAS_040590 | 4.75978 | 3.52971 | 4.07845 | 4.83491 | 4.0666  | 3.99102 | 0.34764 | 0.307415  | 3.52971 | pk | 0.3842687 | 4.078453 | pv |
| PFC0282w | PKH_083320 | PVX_119460 | PY06839 | PBANKA_040510 | PCHAS_040600 | 2.00052 | 2.98047 | 3.08    | 5.2601  | 3.86214 | 1.76996 | 0.90855 | 0.6343331 | 5.2601  | py | 0.5724986 | 3.862136 | pb |
| PFC0290w | PKH_083300 | PVX_119470 | PY05754 | PBANKA_040530 | PCHAS_040620 | 2.46423 | 1.76152 | 2.43869 | 3.41267 | 2.37537 | 1.95775 | 0.37016 | 0.2367297 | 3.41267 | py | 0.2959122 | 2.375373 | pb |
| PFC0300c | PKH_083280 | PVX_119480 | PY05756 | PBANKA_040550 | PCHAS_040640 | 2.20062 | 2.59326 | 2.47076 | 2.70996 | 2.31176 | 1.90936 | 0.22537 | 0.1581681 | 1.90936 | pc | 0.1379107 | 2.70996  | py |
| PFC0310c | PKH_083260 | PVX_119490 | PY06630 | PBANKA_040570 | PCHAS_040660 | 4.38064 | 2.77647 | 3.14962 | 2.59606 | 1.8149  | 2.00751 | 0.64804 | 0.4207355 | 4.38064 | pf | 0.4808171 | 2.776468 | pk |

|          |            |            |         |               |              |         |         |         |         |         |         |         |           |         |    |           |          |    |
|----------|------------|------------|---------|---------------|--------------|---------|---------|---------|---------|---------|---------|---------|-----------|---------|----|-----------|----------|----|
| PFC0315c | PKH_083250 | PVX_119495 | PY06713 | PBANKA_040580 | PCHAS_040670 | 4.21357 | 4.59666 | 4.32996 | 3.7643  | 4.59471 | 5.04597 | 0.32158 | 0.2198195 | 3.7643  | py | 0.2747744 | 4.594711 | pb |
| PFC0320w | PKH_083240 | PVX_119500 | PY05494 | PBANKA_040590 | PCHAS_040680 | 4.29031 | 5.46677 | 4.58889 | 3.29771 | 4.32732 | 3.09427 | 0.61678 | 0.5048471 | 5.46677 | pk | 0.5564149 | 4.58889  | pv |
| PFC0330w | PKH_083220 | PVX_119510 | PY01938 | PBANKA_040610 | PCHAS_040700 | 2.68754 | 2.8943  | 5.61576 | 6.03649 | 3.45246 | 2.1958  | 1.22098 | 0.8369763 | 6.03649 | py | 0.9066808 | 3.45246  | pb |
| PFC0340w | PKH_083200 | PVX_119520 | PY01936 | PBANKA_040630 | PCHAS_040720 | 3.5186  | 3.75616 | 3.48203 | 5.87335 | 4.4227  | 3.43527 | 0.60272 | 0.2523094 | 5.87335 | py | 0.0893622 | 4.422698 | pb |
| PFC0345w | PKH_083190 | PVX_119525 | PY01935 | PBANKA_040640 | PCHAS_040730 | 5.33771 | 5.49511 | 5.21889 | 4.82261 | 5.59112 | 5.39112 | 0.18302 | 0.1059261 | 4.82261 | py | 0.0824077 | 5.591123 | pb |
| PFC0350c | PKH_083180 | PVX_119530 | PY01933 | PBANKA_040650 | PCHAS_040740 | 2.4255  | 3.1703  | 2.99143 | 0.24912 | 2.93663 | 2.92438 | 0.58323 | 0.1623727 | 0.24912 | py | 0.2029659 | 2.936632 | pb |
| PFC0370w | PKH_083140 | PVX_119550 | PY02343 | PBANKA_040690 | PCHAS_040780 | 6.2245  | 6.20081 | 5.66335 | 5.24841 | 6.14573 | 2.47283 | 0.68731 | 0.3027109 | 2.47283 | pc | 0.1540594 | 5.248412 | py |
| PFC0371w | PKH_083130 | PVX_119555 | PY02342 | PBANKA_040700 | PCHAS_040790 | 5.89436 | 3.98543 | 3.93869 | 5.9063  | 3.4072  | 4.77655 | 0.87432 | 0.6650048 | 5.9063  | py | 0.6866971 | 3.407197 | pb |
| PFC0375c | PKH_083120 | PVX_119560 | PY02341 | PBANKA_040710 | PCHAS_040800 | 1.90018 | 2.73042 | 2.28576 | 5.88472 | 2.71621 | 2.25921 | 0.66191 | 0.257448  | 5.88472 | py | 0.214199  | 2.716207 | pb |
| PFC0380w | PKH_083110 | PVX_119565 | PY03455 | PBANKA_040720 | PCHAS_040810 | 2.0507  | 2.8494  | 2.88633 | 2.39478 | 3.29698 | 1.50484 | 0.51373 | 0.3475651 | 1.50484 | pc | 0.3225601 | 3.296983 | pb |
| PFC0385c | PKH_083090 | PVX_119575 | PY03456 | PBANKA_040740 | PCHAS_040830 | 5.08943 | 4.51071 | 5.69007 | 6.13114 | 4.66325 | 5.01231 | 0.45406 | 0.3211056 | 6.13114 | py | 0.314119  | 4.663254 | pb |
| PFC0395w | PKH_083070 | PVX_119585 | PY02906 | PBANKA_040760 | PCHAS_040850 | 2.07207 | 3.44022 | 2.75203 | 2.77288 | 2.14327 | 2.70669 | 0.34052 | 0.261916  | 3.44022 | pk | 0.3160578 | 2.752034 | pv |
| PFC0405c | PKH_083050 | PVX_119590 | PY02904 | PBANKA_040780 | PCHAS_040870 | 0.97563 | 1.82369 | 2.49796 | 2.56292 | 2.39723 | 2.20408 | 0.40912 | 0.2066218 | 0.97563 | pf | 0.1148923 | 1.823692 | pk |
| PFC0410w | PKH_083040 | PVX_119595 | PY07308 | PBANKA_040790 | PCHAS_040880 | 0.86014 | 5.17245 | 2.54688 | 4.87017 | 2.87422 | 3.04177 | 1.13386 | 0.9243052 | 0.86014 | pf | 0.6227095 | 5.172454 | pk |
| PFC0415c | PKH_083030 | PVX_119600 | PY05132 | PBANKA_040800 | PCHAS_040890 | 3.89495 | 4.59652 | 1.94954 | 6.12419 | 3.4495  | 2.1517  | 1.17749 | 0.8780472 | 6.12419 | py | 1.097559  | 3.449505 | pb |
| PFC0430w | PKH_082990 | PVX_119620 | PY07389 | PBANKA_040840 | PCHAS_040930 | 1.95789 | 2.41664 | 1.69348 | 2.20271 | 2.52338 | 2.22321 | 0.21819 | 0.1558845 | 1.69348 | pv | 0.1897319 | 2.202712 | py |
| PFC0435w | PKH_082980 | PVX_119625 | PY07388 | PBANKA_040850 | PCHAS_040940 | 4.73194 | 5.18916 | 5.32146 | 4.88596 | 4.65991 | 5.48141 | 0.2857  | 0.2237551 | 5.48141 | pc | 0.2231801 | 4.659906 | pb |
| PFC0445w | PKH_082950 | PVX_119640 | PY04582 | PBANKA_040870 | PCHAS_040960 | 1.62555 | 0.06173 | 2.50136 | 5.02391 | 3.74082 | 0.09314 | 1.32666 | 1.0648915 | 3.74082 | pb | 1.3311143 | 0.093139 | pc |
| PFC0465c | PKH_082910 | PVX_119660 | PY05315 | PBANKA_040910 | PCHAS_041000 | 2.23221 | 0.85826 | 2.19315 | 2.46401 | 3.22949 | 1.8639  | 0.50174 | 0.327292  | 0.85826 | pk | 0.3993487 | 2.193148 | pv |
| PFC0475c | PKH_082870 | PVX_119670 | PY06311 | PBANKA_040930 | PCHAS_041020 | 5.09173 | 4.94117 | 5.23701 | 0.77296 | 2.87497 | 2.48117 | 1.18126 | 0.8954043 | 2.48117 | pc | 0.6281505 | 0.772965 | py |
| PFC0500w | PKH_082820 | PVX_119695 | PY01712 | PBANKA_040980 | PCHAS_041070 | 4.50663 | 2.96193 | 3.65841 | 5.33676 | 2.57804 | 4.99831 | 0.94055 | 0.7429453 | 2.57804 | pb | 0.8057616 | 4.99831  | pc |
| PFC0510w | PKH_082790 | PVX_119710 | PY01709 | PBANKA_041010 | PCHAS_041100 | 4.46388 | 3.6795  | 3.70414 | 6.08862 | 2.08514 | 2.78319 | 0.95147 | 0.6599388 | 6.08862 | py | 0.4263323 | 2.085138 | pb |

|            |            |            |         |               |              |         |         |         |         |         |         |         |           |         |    |           |          |    |
|------------|------------|------------|---------|---------------|--------------|---------|---------|---------|---------|---------|---------|---------|-----------|---------|----|-----------|----------|----|
| PFC0525c   | PKH_082750 | PVX_119725 | PY01719 | PBANKA_041040 | PCHAS_041130 | 4.32212 | 4.4971  | 5.20686 | 5.20891 | 5.33992 | 4.9751  | 0.3269  | 0.2153274 | 4.32212 | pf | 0.0917198 | 4.4971   | pk |
| PFC0535w   | PKH_082730 | PVX_119740 | PY04507 | PBANKA_041060 | PCHAS_041150 | 2.31258 | 2.06843 | 2.33837 | 2.21316 | 2.61813 | 2.13491 | 0.1421  | 0.0895218 | 2.61813 | pb | 0.0923419 | 2.134914 | pc |
| PFC0555c   | PKH_082690 | PVX_119755 | PY03661 | PBANKA_041090 | PCHAS_041180 | 3.44504 | 3.55089 | 3.49001 | 5.01953 | 2.59024 | 3.40471 | 0.43674 | 0.2091913 | 5.01953 | py | 0.0477888 | 2.590235 | pb |
| PFC0565w   | PKH_082660 | PVX_119770 | PY03663 | PBANKA_041120 | PCHAS_041210 | 1.95242 | 2.86996 | 2.71867 | 2.54221 | 3.10137 | 2.42126 | 0.29569 | 0.2015738 | 1.95242 | pf | 0.2141452 | 2.869959 | pk |
| PFC0575w   | PKH_082630 | PVX_119785 | PY03103 | PBANKA_041150 | PCHAS_041240 | 3.70855 | 4.52433 | 3.51598 | 3.92569 | 3.84954 | 4.19253 | 0.26141 | 0.1787389 | 4.52433 | pk | 0.1400343 | 3.515981 | pv |
| PFC0582c-a | PKH_082600 | PVX_119800 | PY02848 | PBANKA_041180 | PCHAS_041270 | 0.0348  | 0.45004 | 2.53932 | 0.0939  | 2.30452 | 3.31337 | 1.26308 | 0.9430294 | 3.31337 | pc | 1.0749754 | 0.034797 | pf |
| PFC0595c   | PKH_082570 | PVX_119815 | PY02284 | PBANKA_041210 | PCHAS_041300 | 2.00405 | 4.05033 | 2.67845 | 5.80885 | 3.32523 | 0.74278 | 1.29319 | 0.9257453 | 5.80885 | py | 0.9954869 | 3.325229 | pb |
| PFC0600w   | PKH_082560 | PVX_119820 | PY02285 | PBANKA_041220 | PCHAS_041310 | 1.70699 | 1.92301 | 3.93862 | 0.55191 | 1.04794 | 0.24803 | 0.95345 | 0.5660102 | 3.93862 | pv | 0.5835062 | 0.551915 | py |
| PFC0605w   | PKH_082550 | PVX_119825 | PY02286 | PBANKA_041230 | PCHAS_041320 | 2.0922  | 6.26852 | 6.24541 | 4.56215 | 5.70426 | 6.1754  | 0.74125 | 0.4495038 | 2.0922  | pf | 0.538601  | 6.268516 | pk |
| PFC0715c   | PKH_082500 | PVX_095415 | PY03582 | PBANKA_041420 | PCHAS_041510 | 3.86625 | 3.56723 | 3.1606  | 3.26286 | 2.99788 | 2.53708 | 0.33346 | 0.2549979 | 2.53708 | pc | 0.1678999 | 3.866248 | pf |
| PFC0720w   | PKH_082490 | PVX_095410 | PY06387 | PBANKA_041430 | PCHAS_041520 | 4.40184 | 4.73335 | 5.27323 | 4.94867 | 5.1703  | 5.07402 | 0.23895 | 0.1523018 | 4.40184 | pf | 0.1052094 | 4.733353 | pk |
| PFC0725c   | PKH_082480 | PVX_095405 | PY06388 | PBANKA_041440 | PCHAS_041530 | 2.60743 | 1.69562 | 1.13067 | 1.59528 | 2.66927 | 4.79504 | 0.9417  | 0.5101502 | 4.79504 | pc | 0.4964515 | 1.130671 | pv |
| PFC0735w   | PKH_082460 | PVX_095390 | PY04951 | PBANKA_041460 | PCHAS_041550 | 2.23902 | 1.87298 | 2.65567 | 2.63632 | 2.84574 | 3.00856 | 0.29361 | 0.1957946 | 1.87298 | pk | 0.2447432 | 2.655666 | pv |
| PFC0740c   | PKH_082450 | PVX_095385 | PY05143 | PBANKA_080830 | PCHAS_080860 | 0.12837 | 3.47218 | 6.11175 | 3.41284 | 1.15795 | 6.24249 | 1.18307 | 0.8537512 | 3.41284 | py | 0.7675276 | 1.157947 | pb |
| PFC0745c   | PKH_082440 | PVX_095380 | PY00152 | PBANKA_080820 | PCHAS_080850 | 3.6753  | 3.61817 | 3.27543 | 4.46027 | 3.53034 | 3.42134 | 0.25444 | 0.1193381 | 4.46027 | py | 0.1491726 | 3.530336 | pb |
| PFC0755c   | PKH_082420 | PVX_095370 | PY00154 | PBANKA_080800 | PCHAS_080830 | 4.56953 | 5.19036 | 4.91892 | 3.17412 | 4.97711 | 2.37334 | 0.82823 | 0.4847625 | 2.37334 | pc | 0.1697526 | 3.174122 | py |
| PFC0770c   | PKH_082390 | PVX_095355 | PY02733 | PBANKA_080770 | PCHAS_080800 | 4.18455 | 4.6197  | 4.60435 | 2.55814 | 5.07825 | 5.37591 | 0.62114 | 0.3330505 | 2.55814 | py | 0.3016766 | 5.078246 | pb |
| PFC0775w   | PKH_082380 | PVX_095350 | PY06696 | PBANKA_080760 | PCHAS_080790 | 2.18368 | 2.40218 | 2.42176 | 2.95415 | 2.23907 | 2.58627 | 0.18954 | 0.1170569 | 2.95415 | py | 0.1055439 | 2.239069 | pb |
| PFC0805w   | PKH_082310 | PVX_095320 | PY03187 | PBANKA_080700 | PCHAS_080730 | 2.36323 | 3.35918 | 3.70876 | 0.51963 | 1.87384 | 6.06752 | 1.20889 | 0.9348911 | 6.06752 | pc | 0.7077147 | 0.519634 | py |
| PFC0810c   | PKH_082290 | PVX_095315 | PY03186 | PBANKA_080690 | PCHAS_080720 | 1.18661 | 3.24692 | 2.84043 | 2.70281 | 1.80824 | 3.59503 | 0.66412 | 0.4661798 | 1.18661 | pf | 0.4811012 | 3.24692  | pk |
| PFC0815c   | PKH_082280 | PVX_095310 | PY06071 | PBANKA_080680 | PCHAS_080710 | 5.99249 | 4.31104 | 0.07596 | 6.05038 | 0.02044 | 0.99497 | 0.59784 | 0.3188845 | 4.31104 | pk | 0.3847266 | 0.07596  | pv |
| PFC0820w   | PKH_082270 | PVX_095305 | PY06069 | PBANKA_080670 | PCHAS_080700 | 5.86064 | 6.04531 | 5.69717 | 4.62243 | 4.97992 | 4.98831 | 0.50208 | 0.3875457 | 4.62243 | py | 0.3051195 | 4.979918 | pb |

|          |            |            |         |               |              |         |         |         |         |         |         |         |           |         |    |           |          |    |
|----------|------------|------------|---------|---------------|--------------|---------|---------|---------|---------|---------|---------|---------|-----------|---------|----|-----------|----------|----|
| PFC0825c | PKH_082260 | PVX_095300 | PY00757 | PBANKA_080660 | PCHAS_080690 | 1.13381 | 3.44725 | 5.87906 | 4.29995 | 2.25533 | 1.97989 | 1.21549 | 0.9267004 | 5.87906 | pv | 0.6472201 | 4.299953 | py |
| PFC0831w | PKH_082250 | PVX_095295 | PY00756 | PBANKA_080650 | PCHAS_080680 | 0.25369 | 2.60043 | 3.42868 | 3.644   | 3.04813 | 2.85891 | 0.73463 | 0.3226667 | 0.25369 | pf | 0.2914098 | 2.600432 | pk |
| PFC0835c | PKH_082240 | PVX_095290 | PY00755 | PBANKA_080640 | PCHAS_080670 | 3.24077 | 1.64189 | 5.81085 | 2.80047 | 3.21778 | 2.70512 | 0.85365 | 0.4223085 | 5.81085 | pv | 0.5278856 | 2.800471 | py |
| PFC0850c | PKH_082180 | PVX_095275 | PY00970 | PBANKA_080610 | PCHAS_080640 | 2.28109 | 3.31226 | 2.30353 | 2.5291  | 1.10594 | 1.58921 | 0.52811 | 0.4274953 | 3.31226 | pk | 0.5287595 | 2.303528 | pv |
| PFC0860w | PKH_082160 | PVX_095265 | PY00972 | PBANKA_080590 | PCHAS_080620 | 4.52576 | 5.13689 | 4.20212 | 4.10201 | 4.22389 | 4.73494 | 0.31159 | 0.1913141 | 5.13689 | pk | 0.2336998 | 4.202122 | pv |
| PFC0865w | PKH_082150 | PVX_095260 | PY00973 | PBANKA_080580 | PCHAS_080610 | 2.18811 | 2.28471 | 2.28809 | 3.9545  | 2.70542 | 1.86767 | 0.43459 | 0.1875446 | 3.9545  | py | 0.1292532 | 2.705419 | pb |
| PFC0880c | PKH_082120 | PVX_095245 | PY00169 | PBANKA_121870 | PCHAS_121940 | 5.57305 | 3.6297  | 6.27912 | 1.14345 | 1.27471 | 0.28526 | 1.01185 | 0.6264729 | 3.6297  | pk | 0.7107613 | 6.279123 | pv |
| PFC0885c | PKH_082110 | PVX_095240 | PY00168 | PBANKA_121860 | PCHAS_121930 | 1.17523 | 4.52191 | 0.55264 | 4.57501 | 3.92945 | 1.58667 | 1.47187 | 1.1685758 | 1.58667 | pc | 0.7398694 | 1.17523  | pf |
| PFC0890w | PKH_082090 | PVX_095230 | PY01820 | PBANKA_121840 | PCHAS_121910 | 3.20946 | 4.20398 | 4.46467 | 3.5191  | 4.15912 | 4.96745 | 0.45807 | 0.3880208 | 4.96745 | pc | 0.2476105 | 3.209458 | pf |
| PFC0905c | PKH_082060 | PVX_095215 | PY00597 | PBANKA_121810 | PCHAS_121880 | 0.99212 | 0.93611 | 0.55224 | 3.89359 | 1.50672 | 0.83659 | 0.67791 | 0.2220017 | 3.89359 | py | 0.1348503 | 1.506717 | pb |
| PFC0910w | PKH_082010 | PVX_095210 | PY05269 | PBANKA_121800 | PCHAS_121870 | 5.32701 | 2.31131 | 2.44626 | 0.55065 | 0.30971 | 0.59281 | 0.9077  | 0.7794417 | 5.32701 | pf | 0.5446769 | 2.311308 | pk |
| PFC0915w | PKH_081980 | PVX_095195 | PY01870 | PBANKA_121770 | PCHAS_121840 | 3.48934 | 2.76273 | 6.23972 | 3.75275 | 3.24774 | 4.21196 | 0.7841  | 0.390849  | 6.23972 | pv | 0.4227073 | 3.752751 | py |
| PFC0920w | PKH_081970 | PVX_095190 | PY00436 | PBANKA_121760 | PCHAS_121830 | 5.37795 | 5.43596 | 4.77512 | 4.71533 | 5.16653 | 5.47533 | 0.27204 | 0.193927  | 4.71533 | py | 0.1895544 | 5.166532 | pb |
| PFC0925w | PKH_081960 | PVX_095185 | PY00434 | PBANKA_121750 | PCHAS_121820 | 2.41871 | 2.56312 | 2.19624 | 2.16747 | 3.00021 | 1.91406 | 0.28404 | 0.1800599 | 3.00021 | pb | 0.1545284 | 1.914058 | pc |
| PFC0935c | PKH_081940 | PVX_095175 | PY00432 | PBANKA_121730 | PCHAS_121800 | 3.35798 | 3.93928 | 5.3986  | 6.11128 | 3.90892 | 3.61067 | 0.76193 | 0.4738457 | 6.11128 | py | 0.5923071 | 3.908919 | pb |
| PFC0945w | PKH_081920 | PVX_095165 | PY02676 | PBANKA_121710 | PCHAS_121780 | 5.77969 | 3.04496 | 5.02534 | 4.76867 | 5.36367 | 5.35467 | 0.60984 | 0.2698705 | 3.04496 | pk | 0.2550071 | 5.025342 | pv |
| PFC0950c | PKH_081910 | PVX_095160 | PY02677 | PBANKA_121700 | PCHAS_121770 | 3.87311 | 2.6848  | 3.64777 | 2.93181 | 2.91306 | 2.19007 | 0.44413 | 0.3846038 | 2.19007 | pc | 0.2454297 | 3.873113 | pf |
| PFC0955w | PKH_081900 | PVX_095155 | PY03755 | PBANKA_121690 | PCHAS_121760 | 3.77876 | 4.00107 | 3.64398 | 2.2431  | 1.47283 | 2.65539 | 0.84208 | 0.5762685 | 1.47283 | pb | 0.4731885 | 2.655387 | pc |
| PFC0960c | PKH_081890 | PVX_095150 | PY03753 | PBANKA_121680 | PCHAS_121750 | 4.94298 | 4.89304 | 4.6688  | 2.5308  | 4.98465 | 5.17729 | 0.50205 | 0.1200202 | 2.5308  | py | 0.1396077 | 4.984647 | pb |
| PFC0965w | PKH_081880 | PVX_095145 | PY03666 | PBANKA_121670 | PCHAS_121740 | 6.0915  | 6.03535 | 4.35519 | 2.4016  | 2.55638 | 2.51709 | 1.24443 | 0.9403316 | 6.03535 | pk | 0.7158904 | 4.355191 | pv |
| PFC0970w | PKH_081870 | PVX_095140 | PY03667 | PBANKA_121660 | PCHAS_121730 | 1.00037 | 3.90102 | 3.63695 | 1.98596 | 3.3167  | 1.87968 | 0.99811 | 0.7344651 | 1.00037 | pf | 0.7720019 | 3.901022 | pk |
| PFC0995c | PKH_081830 | PVX_095120 | PY01256 | PBANKA_121620 | PCHAS_121690 | 4.23703 | 3.71652 | 2.65412 | 4.94348 | 0.79703 | 0.15972 | 1.30982 | 1.0031487 | 0.79703 | pb | 0.702467  | 0.15972  | pc |

|          |            |            |         |                   |                  |         |         |         |         |         |         |         |           |         |    |           |          |    |
|----------|------------|------------|---------|-------------------|------------------|---------|---------|---------|---------|---------|---------|---------|-----------|---------|----|-----------|----------|----|
| PFC1010w | PKH_081770 | PVX_095100 | PY00640 | PBANKA_121<br>590 | PCHAS_12166<br>0 | 4.44878 | 3.6332  | 0.22878 | 3.40634 | 2.32936 | 2.15176 | 1.11775 | 0.7201705 | 0.22878 | pv | 0.9002131 | 3.406335 | py |
| PFC1011c | PKH_081760 | PVX_095095 | PY00639 | PBANKA_121<br>580 | PCHAS_12165<br>0 | 2.65237 | 2.59813 | 2.41614 | 2.61122 | 2.70233 | 2.0855  | 0.14436 | 0.0680884 | 2.0855  | pc | 0.0363395 | 2.416135 | pv |
| PFC1020c | PKH_081740 | PVX_095080 | PY02291 | PBANKA_121<br>560 | PCHAS_12163<br>0 | 2.13693 | 2.25221 | 2.4453  | 2.45236 | 2.75195 | 1.96208 | 0.2164  | 0.15973   | 2.75195 | pb | 0.1271298 | 1.962081 | pc |
| PFC1030w | PKH_081720 | PVX_095070 | PY06850 | PBANKA_121<br>540 | PCHAS_12161<br>0 | 2.72974 | 0.02626 | 3.16194 | 2.61687 | 3.9411  | 1.80992 | 0.89662 | 0.53525   | 0.02626 | pk | 0.5610114 | 3.161941 | pv |
| PFC1035w | PKH_081710 | PVX_095065 | PY00355 | PBANKA_121<br>530 | PCHAS_12160<br>0 | 3.6595  | 2.54948 | 4.34841 | 4.969   | 4.34241 | 2.57422 | 0.81277 | 0.7134226 | 4.969   | py | 0.7210509 | 4.342412 | pb |
| PFC1050w | PKH_081680 | PVX_095050 | PY00358 | PBANKA_121<br>500 | PCHAS_12157<br>0 | 0.04092 | 0.10359 | 0.21505 | 4.63545 | 3.7272  | 2.03508 | 1.08609 | 0.7713893 | 3.7272  | pb | 0.4813641 | 2.035085 | pc |
| PFC1055w | PKH_081670 | PVX_095045 | PY00359 | PBANKA_121<br>490 | PCHAS_12156<br>0 | 2.25757 | 6.17636 | 2.84522 | 2.63214 | 2.89745 | 2.16381 | 0.67671 | 0.2642564 | 6.17636 | pk | 0.2770496 | 2.845222 | pv |
| PFC1060c | PKH_081660 | PVX_095040 | PY00360 | PBANKA_121<br>480 | PCHAS_12155<br>0 | 0.60718 | 3.7565  | 2.08911 | 2.41579 | 1.51185 | 2.35572 | 0.71998 | 0.5304958 | 3.7565  | pk | 0.6631198 | 2.089109 | pv |
| PFC1065w | PKH_081650 | PVX_095035 | PY01537 | PBANKA_121<br>470 | PCHAS_12154<br>0 | 1.63129 | 5.22775 | 2.60144 | 2.5508  | 3.98928 | 3.12595 | 0.92658 | 0.5866287 | 5.22775 | pk | 0.7332858 | 2.601441 | pv |
| PFD0145c | PKH_031200 | PVX_001095 | PY02440 | PBANKA_100<br>070 | PCHAS_10016<br>0 | 3.68485 | 2.86182 | 2.83473 | 2.18671 | 3.42732 | 2.4821  | 0.41174 | 0.3240663 | 3.68485 | pf | 0.398312  | 2.861816 | pk |
| PFD0150w | PKH_031190 | PVX_001090 | PY02441 | PBANKA_100<br>080 | PCHAS_10017<br>0 | 1.78816 | 0.70588 | 1.47217 | 2.1853  | 3.02221 | 2.53639 | 0.62962 | 0.459655  | 0.70588 | pk | 0.3962863 | 1.472173 | pv |
| PFD0160w | PKH_031170 | PVX_001080 | PY02442 | PBANKA_100<br>100 | PCHAS_10019<br>0 | 0.94074 | 4.15509 | 2.24565 | 0.28539 | 3.01545 | 0.95343 | 1.18608 | 0.8069958 | 4.15509 | pk | 0.6856904 | 2.245649 | pv |
| PFD0170c | PKH_031130 | PVX_001065 | PY02446 | PBANKA_100<br>130 | PCHAS_10022<br>0 | 4.26027 | 4.95998 | 4.17011 | 3.1335  | 4.66034 | 4.40018 | 0.40944 | 0.2379897 | 3.1335  | py | 0.2324474 | 4.660343 | pb |
| PFD0180c | PKH_031100 | PVX_001060 | PY02447 | PBANKA_100<br>140 | PCHAS_10023<br>0 | 2.27673 | 3.0386  | 2.3955  | 2.36715 | 2.68322 | 2.33895 | 0.18908 | 0.0926087 | 3.0386  | pk | 0.1086719 | 2.395502 | pv |
| PFD0190w | PKH_031080 | PVX_001050 | PY01349 | PBANKA_100<br>160 | PCHAS_10025<br>0 | 5.45643 | 4.02019 | 4.93272 | 2.40649 | 4.92313 | 4.70448 | 0.69685 | 0.3328951 | 2.40649 | py | 0.4161189 | 4.923135 | pb |
| PFD0195c | PKH_031070 | PVX_001045 | PY01347 | PBANKA_100<br>170 | PCHAS_10026<br>0 | 5.97635 | 5.02309 | 0.78686 | 4.88301 | 5.50836 | 4.28775 | 0.72682 | 0.4627897 | 0.78686 | pv | 0.5434653 | 4.883006 | py |
| PFD0225w | PKH_031000 | PVX_001010 | PY01338 | PBANKA_100<br>230 | PCHAS_10032<br>0 | 2.24299 | 3.60515 | 6.22643 | 0.257   | 0.86397 | 2.07625 | 1.14336 | 0.8237985 | 3.60515 | pk | 0.7995666 | 6.226431 | pv |
| PFD0230c | PKH_030990 | PVX_001005 | PY01068 | PBANKA_100<br>240 | PCHAS_10033<br>0 | 5.67827 | 5.73688 | 5.26516 | 5.17349 | 5.92315 | 5.37647 | 0.25386 | 0.1952991 | 5.92315 | pb | 0.2441239 | 5.376466 | pc |
| PFD0240c | PKH_030970 | PVX_000995 | PY01066 | PBANKA_100<br>260 | PCHAS_10035<br>0 | 5.39936 | 5.9505  | 5.62221 | 1.66074 | 5.46665 | 5.27564 | 0.5625  | 0.1795396 | 1.66074 | py | 0.2244246 | 5.466652 | pb |
| PFD0245c | PKH_030960 | PVX_000990 | PY03896 | PBANKA_100<br>270 | PCHAS_10036<br>0 | 1.69921 | 1.66752 | 2.07476 | 0.55836 | 0.31634 | 0.82393 | 0.62381 | 0.4984045 | 2.07476 | pv | 0.5566132 | 0.558361 | py |
| PFD0250c | PKH_030950 | PVX_000985 | PY03895 | PBANKA_100<br>280 | PCHAS_10037<br>0 | 4.85591 | 3.93254 | 5.10737 | 2.34337 | 1.90212 | 0.07275 | 1.35686 | 1.0374802 | 1.90212 | pb | 0.9218433 | 0.072754 | pc |
| PFD0265w | PKH_030920 | PVX_000970 | PY01669 | PBANKA_100<br>310 | PCHAS_10040<br>0 | 2.39381 | 2.58263 | 2.90294 | 2.11441 | 2.02993 | 3.1297  | 0.34619 | 0.2682467 | 3.1297  | pc | 0.2443387 | 2.029929 | pb |



|          |            |            |         |               |              |         |         |         |         |         |         |         |           |         |    |           |          |    |
|----------|------------|------------|---------|---------------|--------------|---------|---------|---------|---------|---------|---------|---------|-----------|---------|----|-----------|----------|----|
| PFD0270c | PKH_030910 | PVX_000965 | PY01668 | PBANKA_100320 | PCHAS_100410 | 1.80712 | 2.25986 | 1.66029 | 1.74076 | 1.79168 | 0.68444 | 0.29553 | 0.1331851 | 0.68444 | pc | 0.0494363 | 2.259857 | pk |
| PFD0285c | PKH_030890 | PVX_000955 | PY01667 | PBANKA_100340 | PCHAS_100430 | 2.7742  | 2.5466  | 2.0744  | 6.17415 | 0.64375 | 1.98068 | 0.8133  | 0.5392732 | 6.17415 | py | 0.3164296 | 0.643751 | pb |
| PFD0290w | PKH_030880 | PVX_000950 | PY06651 | PBANKA_100350 | PCHAS_100440 | 3.93786 | 2.93785 | 3.11735 | 4.37586 | 3.43474 | 2.1106  | 0.59711 | 0.4517035 | 2.1106  | pc | 0.3293511 | 4.375855 | py |
| PFD0300w | PKH_030860 | PVX_000940 | PY05103 | PBANKA_100370 | PCHAS_100460 | 4.75907 | 0.73792 | 1.53109 | 2.08593 | 6.15534 | 0.71694 | 0.88166 | 0.6055843 | 4.75907 | pf | 0.7569804 | 0.737922 | pk |
| PFD0305c | PKH_030850 | PVX_000935 | PY05102 | PBANKA_100380 | PCHAS_100470 | 2.92476 | 2.62548 | 2.87008 | 2.42101 | 2.71281 | 2.17328 | 0.21465 | 0.1496705 | 2.17328 | pc | 0.1341011 | 2.924761 | pf |
| PFD0311w | PKH_030830 | PVX_000925 | PY05100 | PBANKA_100400 | PCHAS_100490 | 2.81128 | 2.88533 | 2.85292 | 2.21242 | 2.55336 | 1.56356 | 0.37003 | 0.1944934 | 1.56356 | pc | 0.0934019 | 2.212419 | py |
| PFD0320c | PKH_030820 | PVX_000920 | PY05099 | PBANKA_100410 | PCHAS_100500 | 0.86677 | 4.50879 | 5.03641 | 3.90113 | 4.1185  | 1.70031 | 1.16253 | 0.7887508 | 0.86677 | pf | 0.8883648 | 4.508793 | pk |
| PFD0325w | PKH_030810 | PVX_000915 | PY06037 | PBANKA_100420 | PCHAS_100510 | 3.85778 | 3.54421 | 3.85657 | 5.21986 | 3.66098 | 3.71259 | 0.33607 | 0.1018327 | 5.21986 | py | 0.114387  | 3.660979 | pb |
| PFD0335c | PKH_030790 | PVX_000905 | PY03014 | PBANKA_100440 | PCHAS_100530 | 3.99136 | 4.77087 | 4.01061 | 5.67118 | 3.11997 | 3.71653 | 0.60413 | 0.3889952 | 5.67118 | py | 0.2683954 | 3.119969 | pb |
| PFD0350w | PKH_030760 | PVX_000890 | PY05693 | PBANKA_100470 | PCHAS_100560 | 2.29488 | 2.29594 | 3.23372 | 4.35713 | 4.28705 | 3.98683 | 0.80108 | 0.6229047 | 2.29488 | pf | 0.3559084 | 2.295939 | pk |
| PFD0365c | PKH_030730 | PVX_000875 | PY05630 | PBANKA_100500 | PCHAS_100590 | 3.13298 | 4.25054 | 2.55891 | 3.59231 | 1.24011 | 3.53749 | 0.74139 | 0.4301919 | 1.24011 | pb | 0.5377399 | 3.537489 | pc |
| PFD0367w | PKH_030720 | PVX_000870 | PY07641 | PBANKA_100510 | PCHAS_100600 | 2.63771 | 2.51156 | 1.82828 | 2.55113 | 0.9077  | 2.2841  | 0.44672 | 0.2152913 | 0.9077  | pb | 0.2122486 | 2.284102 | pc |
| PFD0380c | PKH_030700 | PVX_000860 | PY03395 | PBANKA_100530 | PCHAS_100620 | 5.56678 | 5.36233 | 5.10978 | 3.6872  | 3.27458 | 2.5945  | 1.08044 | 0.7934658 | 2.5945  | pc | 0.8775824 | 5.566781 | pf |
| PFD0390c | PKH_030680 | PVX_000850 | PY02232 | PBANKA_100550 | PCHAS_100640 | 5.98768 | 4.76446 | 4.31908 | 5.0108  | 4.26996 | 3.64272 | 0.58853 | 0.3725145 | 5.98768 | pf | 0.3542973 | 4.764461 | pk |
| PFD0395c | PKH_030670 | PVX_000845 | PY02233 | PBANKA_100560 | PCHAS_100650 | 6.28286 | 0.22449 | 1.47577 | 5.9168  | 0.2267  | 6.14742 | 0.40491 | 0.1906678 | 1.47577 | pv | 0.146819  | 5.916801 | py |
| PFD0400w | PKH_030660 | PVX_000840 | PY02234 | PBANKA_100570 | PCHAS_100660 | 0.21444 | 4.42382 | 5.34298 | 1.72801 | 0.54639 | 1.41565 | 1.04586 | 0.773887  | 4.42382 | pk | 0.5957101 | 5.342979 | pv |
| PFD0403w | PKH_030650 | PVX_000835 | PY02235 | PBANKA_100580 | PCHAS_100670 | 0.08462 | 0.30771 | 0.43272 | 0.56783 | 0.26176 | 0.94319 | 0.21494 | 0.130836  | 0.94319 | pc | 0.1077725 | 0.084616 | pf |
| PFD0415c | PKH_030630 | PVX_000825 | PY02237 | PBANKA_100600 | PCHAS_100690 | 3.62422 | 3.03273 | 3.12824 | 2.20358 | 3.3678  | 2.5239  | 0.39334 | 0.2870787 | 2.20358 | py | 0.2989566 | 3.367803 | pb |
| PFD0420c | PKH_030620 | PVX_000820 | PY02238 | PBANKA_100610 | PCHAS_100700 | 4.39417 | 5.083   | 5.43854 | 4.5392  | 4.81369 | 4.72416 | 0.27962 | 0.1926637 | 5.43854 | pv | 0.1945903 | 4.539199 | py |
| PFD0440w | PKH_030580 | PVX_000800 | PY00451 | PBANKA_100650 | PCHAS_100740 | 3.85758 | 3.6664  | 4.05149 | 0.36468 | 3.11467 | 1.74837 | 1.00458 | 0.6092058 | 0.36468 | py | 0.6235759 | 3.114673 | pb |
| PFD0455w | PKH_030550 | PVX_000785 | PY04096 | PBANKA_100680 | PCHAS_100770 | 1.54976 | 2.50558 | 2.24381 | 0.21692 | 0.48487 | 0.95002 | 0.77456 | 0.6183545 | 2.50558 | pk | 0.4494959 | 2.243805 | pv |
| PFD0460c | PKH_030530 | PVX_000780 | PY04095 | PBANKA_100690 | PCHAS_100780 | 1.76081 | 3.35614 | 2.26224 | 2.38018 | 2.0606  | 1.52323 | 0.44232 | 0.2716758 | 3.35614 | pk | 0.2891834 | 2.262243 | pv |

|          |            |            |         |               |              |         |         |         |         |         |         |         |           |         |    |           |          |    |
|----------|------------|------------|---------|---------------|--------------|---------|---------|---------|---------|---------|---------|---------|-----------|---------|----|-----------|----------|----|
| PFD0462w | PKH_030520 | PVX_000775 | PY04093 | PBANKA_100700 | PCHAS_100790 | 2.23388 | 2.47202 | 2.58763 | 3.77133 | 2.79506 | 1.45961 | 0.49808 | 0.3378392 | 3.77133 | py | 0.3415389 | 2.795059 | pb |
| PFD0465c | PKH_030510 | PVX_000770 | PY04092 | PBANKA_100710 | PCHAS_100800 | 4.11309 | 3.80064 | 2.43311 | 2.34678 | 3.06575 | 4.60714 | 0.7792  | 0.6267662 | 4.60714 | pc | 0.6037173 | 2.346784 | py |
| PFD0470c | PKH_030500 | PVX_000765 | PY04090 | PBANKA_100720 | PCHAS_100810 | 3.96972 | 5.00339 | 1.73091 | 2.88628 | 2.68552 | 3.10076 | 0.79519 | 0.5308084 | 5.00339 | pk | 0.3746696 | 1.730911 | pv |
| PFD0480w | PKH_030490 | PVX_000760 | PY04089 | PBANKA_100730 | PCHAS_100820 | 4.54254 | 4.21398 | 1.36107 | 4.6656  | 3.4479  | 3.85942 | 0.79229 | 0.3801634 | 1.36107 | pv | 0.3623003 | 4.665597 | py |
| PFD0485w | PKH_030480 | PVX_000755 | PY04088 | PBANKA_100740 | PCHAS_100830 | 1.00316 | 6.14143 | 5.37501 | 1.33975 | 0.18197 | 3.85313 | 1.00081 | 0.6785693 | 3.85313 | pc | 0.5587668 | 1.339752 | py |
| PFD0487c | PKH_030470 | PVX_000750 | PY04087 | PBANKA_100750 | PCHAS_100840 | 5.27399 | 3.81368 | 6.15397 | 0.27436 | 0.79989 | 1.07219 | 0.95906 | 0.6020966 | 3.81368 | pk | 0.6517267 | 6.153969 | pv |
| PFD0495c | PKH_030460 | PVX_000745 | PY04086 | PBANKA_100760 | PCHAS_100850 | 0.2682  | 1.32708 | 2.40873 | 1.77169 | 2.42849 | 0.36372 | 0.77499 | 0.6292832 | 0.2682  | pf | 0.6754517 | 1.327083 | pk |
| PFD0515w | PKH_030440 | PVX_000730 | PY02309 | PBANKA_100780 | PCHAS_100870 | 1.68936 | 3.12803 | 2.59149 | 2.04273 | 3.21676 | 0.70492 | 0.74988 | 0.5225396 | 0.70492 | pc | 0.4968578 | 3.216758 | pb |
| PFD0545w | PKH_030380 | PVX_000700 | PY04864 | PBANKA_061240 | PCHAS_061410 | 1.53847 | 3.64327 | 0.63666 | 0.855   | 6.19309 | 5.94945 | 0.97065 | 0.5634589 | 3.64327 | pk | 0.7043236 | 0.636663 | pv |
| PFD0555c | PKH_030360 | PVX_000690 | PY04866 | PBANKA_061260 | PCHAS_061430 | 2.65621 | 2.61046 | 3.80772 | 2.88848 | 4.11582 | 2.31298 | 0.53873 | 0.3545539 | 4.11582 | pb | 0.357383  | 2.312977 | pc |
| PFD0560w | PKH_030350 | PVX_000685 | PY04867 | PBANKA_061270 | PCHAS_061440 | 3.40947 | 3.17799 | 3.22933 | 6.10453 | 4.28097 | 5.53785 | 1.01776 | 0.6822995 | 6.10453 | py | 0.6349995 | 4.280967 | pb |
| PFD0565c | PKH_030340 | PVX_000680 | PY04868 | PBANKA_061280 | PCHAS_061450 | 2.08272 | 2.45645 | 2.06908 | 2.24241 | 1.38944 | 2.63326 | 0.29848 | 0.1875807 | 1.38944 | pb | 0.1367631 | 2.633257 | pc |
| PFD0590c | PKH_030300 | PVX_000650 | PY06115 | PBANKA_061320 | PCHAS_061490 | 4.31586 | 3.49984 | 4.86494 | 5.04269 | 5.18127 | 4.63624 | 0.43949 | 0.2543726 | 3.49984 | pk | 0.3179657 | 4.86494  | pv |
| PFD0605c | PKH_030270 | PVX_000635 | PY05325 | PBANKA_061350 | PCHAS_061520 | 2.09009 | 3.53609 | 6.22934 | 3.11796 | 3.72476 | 2.04411 | 1.03967 | 0.6253293 | 6.22934 | pv | 0.7816616 | 3.117965 | py |
| PFD0610w | PKH_030260 | PVX_000630 | PY05326 | PBANKA_061360 | PCHAS_061530 | 3.39734 | 3.53678 | 2.70785 | 2.51539 | 2.25385 | 1.84561 | 0.50452 | 0.4329757 | 1.84561 | pc | 0.3339877 | 3.536782 | pk |
| PFD0660w | PKH_051720 | PVX_089635 | PY00543 | PBANKA_071550 | PCHAS_072460 | 4.82464 | 5.52752 | 3.27898 | 5.37657 | 4.28337 | 5.33161 | 0.64145 | 0.3592164 | 3.27898 | pv | 0.4377784 | 5.376574 | py |
| PFD0665c | PKH_051730 | PVX_089640 | PY00544 | PBANKA_071560 | PCHAS_072470 | 4.1785  | 4.29583 | 3.44689 | 3.05513 | 3.42724 | 3.99441 | 0.42325 | 0.3200405 | 3.05513 | py | 0.2582573 | 3.427236 | pb |
| PFD0675w | PKH_051750 | PVX_089650 | PY00545 | PBANKA_071580 | PCHAS_072490 | 4.45081 | 3.40275 | 2.63036 | 3.26371 | 4.33964 | 4.41793 | 0.65193 | 0.4404556 | 2.63036 | pv | 0.2815856 | 3.263708 | py |
| PFD0680c | PKH_051760 | PVX_089655 | PY00546 | PBANKA_071590 | PCHAS_072500 | 4.01328 | 5.68433 | 2.95198 | 3.37003 | 3.517   | 3.6813  | 0.58998 | 0.274513  | 5.68433 | pk | 0.2018866 | 2.951983 | pv |
| PFD0685c | PKH_051770 | PVX_089660 | PY00549 | PBANKA_071600 | PCHAS_072510 | 3.86331 | 4.58181 | 4.78203 | 2.66465 | 3.97195 | 3.87808 | 0.48829 | 0.3244905 | 2.66465 | py | 0.4056131 | 3.971948 | pb |
| PFD0705c | PKH_051830 | PVX_089685 | PY02203 | PBANKA_071660 | PCHAS_072570 | 5.37584 | 5.04349 | 5.82092 | 3.73092 | 4.52364 | 5.20761 | 0.51772 | 0.3259265 | 3.73092 | py | 0.2364152 | 4.52364  | pb |
| PFD0710w | PKH_051840 | PVX_089690 | PY02202 | PBANKA_071670 | PCHAS_072580 | 5.09533 | 4.23002 | 0.44001 | 4.57358 | 2.26886 | 2.5084  | 1.23081 | 0.9783313 | 0.44001 | pv | 1.1370231 | 4.573581 | py |



|            |            |            |         |                   |                  |         |         |         |         |         |         |         |           |         |    |           |          |    |
|------------|------------|------------|---------|-------------------|------------------|---------|---------|---------|---------|---------|---------|---------|-----------|---------|----|-----------|----------|----|
| PFD0720w   | PKH_051860 | PVX_089700 | PY02199 | PBANKA_071<br>690 | PCHAS_07260<br>0 | 6.07796 | 5.93569 | 5.81524 | 5.73789 | 5.88081 | 5.75437 | 0.09783 | 0.0648484 | 6.07796 | pf | 0.0509482 | 5.93569  | pk |
| PFD0725c   | PKH_051870 | PVX_089705 | PY02198 | PBANKA_071<br>700 | PCHAS_07261<br>0 | 1.61181 | 6.26553 | 4.93079 | 5.87137 | 2.59506 | 2.04863 | 1.33956 | 1.014633  | 4.93079 | pv | 0.7623841 | 5.871371 | py |
| PFD0730w   | PKH_051880 | PVX_089710 | PY02197 | PBANKA_071<br>710 | PCHAS_07262<br>0 | 1.51169 | 3.01563 | 5.37081 | 3.2282  | 3.07877 | 2.47094 | 0.77992 | 0.4648673 | 5.37081 | pv | 0.5279428 | 3.228198 | py |
| PFD0750w   | PKH_051920 | PVX_089730 | PY02814 | PBANKA_071<br>750 | PCHAS_07266<br>0 | 2.91399 | 0.72208 | 1.7681  | 2.56888 | 2.84449 | 1.23742 | 0.76663 | 0.5505899 | 0.72208 | pk | 0.4880432 | 1.768102 | pv |
| PFD0755c   | PKH_051930 | PVX_089735 | PY02813 | PBANKA_071<br>760 | PCHAS_07267<br>0 | 0.6804  | 2.40641 | 2.32359 | 4.46839 | 2.59607 | 1.89864 | 0.76137 | 0.4846888 | 4.46839 | py | 0.5377402 | 2.59607  | pb |
| PFD0760c   | PKH_051940 | PVX_089740 | PY02812 | PBANKA_071<br>770 | PCHAS_07268<br>0 | 4.82892 | 5.00786 | 3.98305 | 3.7933  | 3.78551 | 4.87387 | 0.5248  | 0.4247954 | 5.00786 | pk | 0.5309942 | 3.983047 | pv |
| PFD0770c   | PKH_051960 | PVX_089750 | PY02811 | PBANKA_071<br>780 | PCHAS_07269<br>0 | 2.3113  | 1.99715 | 2.62855 | 2.45696 | 1.55512 | 2.32921 | 0.25853 | 0.1554125 | 1.55512 | pb | 0.1942656 | 2.329212 | pc |
| PFD0780w   | PKH_052020 | PVX_089895 | PY02858 | PBANKA_071<br>810 | PCHAS_07272<br>0 | 4.19012 | 3.26227 | 2.47963 | 3.50012 | 4.2442  | 2.14206 | 0.67508 | 0.5384851 | 2.14206 | pc | 0.4870868 | 4.2442   | pb |
| PFD0795w   | PKH_052050 | PVX_089910 | PY02860 | PBANKA_071<br>840 | PCHAS_07275<br>0 | 4.40736 | 3.99992 | 4.21849 | 2.40464 | 3.91609 | 4.22088 | 0.42101 | 0.142446  | 2.40464 | py | 0.1024575 | 3.916087 | pb |
| PFD0800c   | PKH_052060 | PVX_089915 | PY02861 | PBANKA_071<br>850 | PCHAS_07276<br>0 | 4.80563 | 4.04464 | 4.61457 | 5.89417 | 3.5402  | 2.35847 | 0.89518 | 0.6229903 | 2.35847 | pc | 0.4588379 | 5.894169 | py |
| PFD0810w   | PKH_052090 | PVX_089930 | PY04367 | PBANKA_071<br>880 | PCHAS_07279<br>0 | 3.30391 | 4.58123 | 4.94136 | 4.87713 | 4.9081  | 5.38159 | 0.41146 | 0.1729185 | 3.30391 | pf | 0.1344318 | 4.581231 | pk |
| PFD0815c   | PKH_052100 | PVX_089935 | PY04368 | PBANKA_071<br>890 | PCHAS_07280<br>0 | 2.48549 | 3.15964 | 1.84329 | 3.21422 | 2.20198 | 2.50865 | 0.39196 | 0.3372788 | 1.84329 | pv | 0.2452058 | 3.214218 | py |
| PFD0830w   | PKH_052130 | PVX_089950 | PY04370 | PBANKA_071<br>930 | PCHAS_07283<br>0 | 3.96363 | 4.79919 | 3.65401 | 1.00716 | 4.22785 | 4.41562 | 0.77661 | 0.3194367 | 1.00716 | py | 0.3992959 | 4.227849 | pb |
| PFD0835c   | PKH_052150 | PVX_089955 | PY04371 | PBANKA_071<br>940 | PCHAS_07284<br>0 | 2.46594 | 2.4822  | 1.85575 | 2.07537 | 2.72655 | 1.8387  | 0.31748 | 0.2507388 | 2.72655 | pb | 0.2542553 | 1.838696 | pc |
| PFD0850c-a | PKH_052160 | PVX_089970 | PY04533 | PBANKA_071<br>960 | PCHAS_07286<br>0 | 3.92377 | 2.52108 | 2.52403 | 5.50757 | 2.97311 | 1.58216 | 0.96286 | 0.5587286 | 5.50757 | py | 0.5861399 | 2.973113 | pb |
| PFD0875c   | PKH_052220 | PVX_089995 | PY03308 | PBANKA_072<br>020 | PCHAS_07292<br>0 | 1.77838 | 0.55334 | 0.70273 | 1.12592 | 1.58359 | 1.08101 | 0.35847 | 0.2906864 | 1.77838 | pf | 0.2314422 | 0.553344 | pk |
| PFD0880w   | PKH_052230 | PVX_090000 | PY03267 | PBANKA_072<br>030 | PCHAS_07293<br>0 | 2.28559 | 2.008   | 2.65133 | 2.8033  | 2.41405 | 2.14562 | 0.23825 | 0.1823547 | 2.8033  | py | 0.195828  | 2.414054 | pb |
| PFD0885c   | PKH_052240 | PVX_090005 | PY03268 | PBANKA_072<br>040 | PCHAS_07294<br>0 | 5.92284 | 0.39441 | 6.03197 | 6.22747 | 0.40343 | 5.36154 | 0.37922 | 0.2818817 | 5.36154 | pc | 0.2375656 | 0.403434 | pb |
| PFD0900w   | PKH_052290 | PVX_090020 | PY06816 | PBANKA_072<br>070 | PCHAS_07297<br>0 | 6.01699 | 5.73933 | 5.95582 | 6.15319 | 5.72356 | 1.0193  | 0.34232 | 0.1414564 | 1.0193  | pc | 0.1187565 | 5.723565 | pb |
| PFD0905w   | PKH_052300 | PVX_090025 | PY05599 | PBANKA_072<br>080 | PCHAS_07298<br>0 | 0.41603 | 1.78596 | 2.11449 | 0.056   | 0.55317 | 1.34459 | 0.7033  | 0.5317021 | 2.11449 | pv | 0.5403357 | 0.056005 | py |
| PFD0930w   | PKH_052350 | PVX_090050 | PY07464 | PBANKA_072<br>130 | PCHAS_07303<br>0 | 5.31711 | 3.32397 | 3.72908 | 0.99034 | 1.74717 | 0.22049 | 1.42591 | 1.1633474 | 3.72908 | pv | 1.4541843 | 0.990336 | py |
| PFD0950w   | PKH_052390 | PVX_090070 | PY07276 | PBANKA_072<br>170 | PCHAS_07307<br>0 | 2.89375 | 4.03824 | 2.62839 | 2.62606 | 3.60706 | 2.49772 | 0.46448 | 0.275405  | 4.03824 | pk | 0.3442563 | 2.628386 | pv |

|          |            |            |         |               |              |         |         |         |         |         |         |         |           |         |    |           |          |    |
|----------|------------|------------|---------|---------------|--------------|---------|---------|---------|---------|---------|---------|---------|-----------|---------|----|-----------|----------|----|
| PFD0975w | PKH_052440 | PVX_090095 | PY06287 | PBANKA_052140 | PCHAS_052160 | 1.56453 | 1.94615 | 2.01169 | 2.69575 | 0.59589 | 1.34259 | 0.5251  | 0.3600629 | 0.59589 | pb | 0.2991901 | 1.342593 | pc |
| PFD0980w | PKH_052460 | PVX_090105 | PY06285 | PBANKA_052160 | PCHAS_052180 | 3.29044 | 2.71015 | 3.59273 | 6.09638 | 2.97517 | 2.53205 | 0.7937  | 0.3281934 | 6.09638 | py | 0.4102417 | 2.975172 | pb |
| PFD0985w | PKH_052480 | PVX_090110 | PY06328 | PBANKA_052170 | PCHAS_052190 | 6.26398 | 0.21338 | 0.79699 | 4.78945 | 0.39115 | 0.71543 | 0.53386 | 0.2636501 | 4.78945 | py | 0.3295626 | 0.391155 | pb |
| PFD1030c | PKH_052510 | PVX_090130 | PY02465 | PBANKA_052210 | PCHAS_052230 | 0.72182 | 5.37489 | 6.19794 | 4.76746 | 1.62113 | 2.58036 | 1.23876 | 0.9533937 | 2.58036 | pc | 0.8341214 | 4.76746  | py |
| PFD1037w | PKH_052550 | PVX_090145 | PY05566 | PBANKA_052250 | PCHAS_052270 | 2.93832 | 2.54989 | 4.74911 | 1.8749  | 3.20291 | 4.27045 | 0.80989 | 0.6097132 | 4.74911 | pv | 0.4962865 | 1.874903 | py |
| PFD1050w | PKH_052580 | PVX_090155 | PY04063 | PBANKA_052270 | PCHAS_052290 | 0.00462 | 4.47317 | 4.69149 | 4.19565 | 5.39531 | 4.32401 | 0.56363 | 0.3134278 | 0.00462 | pf | 0.3917847 | 4.47317  | pk |
| PFD1055w | PKH_052590 | PVX_090160 | PY04062 | PBANKA_052280 | PCHAS_052300 | 2.21037 | 1.58243 | 2.53325 | 2.04066 | 1.91255 | 2.40955 | 0.26959 | 0.1979163 | 1.58243 | pk | 0.1666759 | 2.533247 | pv |
| PFD1070w | PKH_052620 | PVX_090175 | PY06447 | PBANKA_052310 | PCHAS_052330 | 2.05763 | 1.45338 | 2.42631 | 0.50316 | 1.34951 | 2.50629 | 0.61403 | 0.4259408 | 0.50316 | py | 0.3553951 | 1.349506 | pb |
| PFD1075w | PKH_052630 | PVX_090180 | PY06448 | PBANKA_052320 | PCHAS_052340 | 4.46773 | 3.25866 | 5.41396 | 4.9196  | 4.3811  | 2.18404 | 0.82958 | 0.53876   | 2.18404 | pc | 0.4368904 | 5.413964 | pv |
| PFD1090c | PKH_052650 | PVX_090195 | PY06451 | PBANKA_052350 | PCHAS_052370 | 2.74337 | 3.48213 | 3.33371 | 5.80707 | 2.88159 | 3.7263  | 0.67614 | 0.3166924 | 5.80707 | py | 0.2828368 | 2.881591 | pb |
| PFD1095w | PKH_052670 | PVX_090200 | PY06452 | PBANKA_052360 | PCHAS_052380 | 5.38031 | 3.26261 | 4.43474 | 5.48433 | 3.72554 | 4.67942 | 0.68686 | 0.5408714 | 3.26261 | pk | 0.6149197 | 4.434744 | pv |
| PFD1100c | PKH_052680 | PVX_090205 | PY06453 | PBANKA_052370 | PCHAS_052390 | 5.72064 | 5.69085 | 5.57886 | 4.76951 | 5.71131 | 5.64221 | 0.1887  | 0.0421746 | 4.76951 | py | 0.047603  | 5.711307 | pb |
| PFD1105w | PKH_052690 | PVX_090210 | PY06454 | PBANKA_052380 | PCHAS_052400 | 5.71566 | 5.85938 | 5.62365 | 5.36176 | 5.45759 | 5.57957 | 0.13329 | 0.1039917 | 5.85938 | pk | 0.1189701 | 5.623652 | pv |
| PFD1110w | PKH_052700 | PVX_090215 | PY06455 | PBANKA_052390 | PCHAS_052410 | 5.38707 | 5.86164 | 5.89007 | 5.27588 | 5.57371 | 5.2399  | 0.2371  | 0.1839148 | 5.89007 | pv | 0.2020951 | 5.27588  | py |
| PFD1115c | PKH_052710 | PVX_090220 | PY06456 | PBANKA_052400 | PCHAS_052420 | 0.85337 | 4.99793 | 3.2931  | 2.67946 | 2.84601 | 2.02723 | 0.9295  | 0.651701  | 4.99793 | pk | 0.6612164 | 3.293102 | pv |
| PFE0090w | PKH_103170 | PVX_097595 | PY03920 | PBANKA_110160 | PCHAS_110130 | 4.14507 | 4.6085  | 4.75967 | 3.6462  | 5.22289 | 4.65826 | 0.37351 | 0.2457982 | 3.6462  | py | 0.1660905 | 5.222888 | pb |
| PFE0120c | PKH_103110 | PVX_097625 | PY06415 | PBANKA_110220 | PCHAS_110190 | 0.84387 | 1.78617 | 2.3578  | 2.22137 | 1.01295 | 1.59155 | 0.48616 | 0.394934  | 0.84387 | pf | 0.4936675 | 1.786169 | pk |
| PFE0130c | PKH_103080 | PVX_097640 | PY06025 | PBANKA_110240 | PCHAS_110210 | 2.25738 | 2.86684 | 3.22569 | 0.89265 | 2.71823 | 2.78316 | 0.50124 | 0.2233823 | 0.89265 | py | 0.2629976 | 2.718235 | pb |
| PFE0135w | PKH_103070 | PVX_097645 | PY04661 | PBANKA_110250 | PCHAS_110220 | 1.86151 | 3.41179 | 3.08123 | 5.64788 | 3.2146  | 2.2605  | 0.84517 | 0.5008756 | 5.64788 | py | 0.5927535 | 3.214598 | pb |
| PFE0145w | PKH_103050 | PVX_097655 | PY04664 | PBANKA_110270 | PCHAS_110240 | 4.81992 | 3.75867 | 3.58605 | 2.73564 | 3.56531 | 3.11433 | 0.45823 | 0.2989526 | 4.81992 | pf | 0.3253484 | 3.758675 | pk |
| PFE0150c | PKH_103040 | PVX_097660 | PY04665 | PBANKA_110280 | PCHAS_110250 | 3.2244  | 5.23194 | 3.7261  | 5.22492 | 2.79104 | 2.66586 | 0.91695 | 0.6988253 | 5.23194 | pk | 0.7481063 | 3.726098 | pv |
| PFE0165w | PKH_102980 | PVX_097745 | PY04700 | PBANKA_110310 | PCHAS_110280 | 5.2328  | 5.59574 | 4.98162 | 3.85553 | 4.2541  | 4.31515 | 0.56423 | 0.4209564 | 5.59574 | pk | 0.3595778 | 4.981617 | pv |

|          |            |            |         |                   |                  |         |         |         |         |         |         |         |           |         |    |           |          |    |
|----------|------------|------------|---------|-------------------|------------------|---------|---------|---------|---------|---------|---------|---------|-----------|---------|----|-----------|----------|----|
| PFE0170c | PKH_102970 | PVX_097750 | PY04701 | PBANKA_110<br>320 | PCHAS_11029<br>0 | 2.60402 | 5.49424 | 3.52735 | 0.20827 | 3.34879 | 1.96504 | 1.26551 | 0.890506  | 0.20827 | py | 1.1131325 | 3.348791 | pb |
| PFE0175c | PKH_102930 | PVX_097755 | PY00345 | PBANKA_110<br>330 | PCHAS_11030<br>0 | 6.09891 | 6.13416 | 5.61308 | 0.31686 | 0.30431 | 5.85007 | 0.29327 | 0.2477139 | 5.61308 | pv | 0.1931688 | 0.316865 | py |
| PFE0185c | PKH_102920 | PVX_097760 | PY00344 | PBANKA_110<br>340 | PCHAS_11031<br>0 | 2.2882  | 1.7753  | 2.42622 | 2.2276  | 2.53689 | 2.32187 | 0.16564 | 0.0894592 | 1.7753  | pk | 0.0857365 | 2.426217 | pv |
| PFE0190c | PKH_102910 | PVX_097765 | PY00343 | PBANKA_110<br>350 | PCHAS_11032<br>0 | 3.24499 | 2.38762 | 3.07033 | 2.95825 | 2.8444  | 3.42736 | 0.25874 | 0.173941  | 2.38762 | pk | 0.2174262 | 3.070334 | pv |
| PFE0215w | PKH_102860 | PVX_097785 | PY03841 | PBANKA_110<br>400 | PCHAS_11037<br>0 | 3.85482 | 2.46282 | 2.77938 | 0.91194 | 3.30339 | 2.89194 | 0.64934 | 0.3832014 | 0.91194 | py | 0.3761408 | 3.303387 | pb |
| PFE0225w | PKH_102840 | PVX_097790 | PY03843 | PBANKA_110<br>420 | PCHAS_11039<br>0 | 5.40642 | 3.46371 | 5.01003 | 4.57009 | 3.61416 | 4.33331 | 0.59589 | 0.5004488 | 5.40642 | pf | 0.4081623 | 3.463714 | pk |
| PFE0235c | PKH_102820 | PVX_097800 | PY03845 | PBANKA_110<br>440 | PCHAS_11041<br>0 | 4.51974 | 4.87613 | 4.18335 | 6.06944 | 5.15744 | 5.19975 | 0.47457 | 0.33082   | 6.06944 | py | 0.3431964 | 5.157443 | pb |
| PFE0245c | PKH_102800 | PVX_097810 | PY04880 | PBANKA_110<br>460 | PCHAS_11043<br>0 | 1.81917 | 3.14258 | 2.34177 | 1.53816 | 0.65996 | 2.27147 | 0.62309 | 0.4254039 | 0.65996 | pb | 0.5317548 | 2.271467 | pc |
| PFE0255w | PKH_102780 | PVX_097820 | PY00875 | PBANKA_110<br>480 | PCHAS_11045<br>0 | 5.59625 | 0.00065 | 3.90231 | 6.23493 | 2.39534 | 1.07673 | 1.09813 | 0.8290386 | 2.39534 | pb | 0.7550516 | 1.076733 | pc |
| PFE0270c | PKH_102750 | PVX_097835 | PY02936 | PBANKA_110<br>510 | PCHAS_11048<br>0 | 3.93407 | 5.17261 | 4.57875 | 5.74354 | 4.22514 | 4.9492  | 0.52123 | 0.3925212 | 5.74354 | py | 0.4022491 | 4.225145 | pb |
| PFE0300c | PKH_102690 | PVX_097860 | PY00711 | PBANKA_110<br>570 | PCHAS_11054<br>0 | 2.17515 | 1.89373 | 2.06352 | 1.1875  | 0.90388 | 1.56993 | 0.41185 | 0.2962468 | 0.90388 | pb | 0.289359  | 1.569934 | pc |
| PFE0305w | PKH_102680 | PVX_097865 | PY00712 | PBANKA_110<br>580 | PCHAS_11055<br>0 | 1.25565 | 2.17967 | 2.52027 | 0.1204  | 0.56754 | 0.88032 | 0.73122 | 0.5494755 | 2.52027 | pv | 0.4968639 | 0.120398 | py |
| PFE0310c | PKH_102670 | PVX_097870 | PY00713 | PBANKA_110<br>590 | PCHAS_11056<br>0 | 3.52766 | 2.21437 | 2.98731 | 1.90469 | 3.38688 | 1.88422 | 0.64976 | 0.5170546 | 3.52766 | pf | 0.6463183 | 2.214373 | pk |
| PFE0330w | PKH_102620 | PVX_097895 | PY06258 | PBANKA_110<br>630 | PCHAS_11060<br>0 | 3.79582 | 6.05095 | 4.50731 | 5.36392 | 1.31328 | 4.88156 | 0.97111 | 0.6223503 | 1.31328 | pb | 0.7779379 | 4.881562 | pc |
| PFE0335w | PKH_102610 | PVX_097900 | PY04352 | PBANKA_110<br>640 | PCHAS_11061<br>0 | 2.06569 | 1.732   | 2.5406  | 0.65291 | 1.46001 | 2.78021 | 0.59026 | 0.4257601 | 0.65291 | py | 0.3807806 | 1.460007 | pb |
| PFE0340c | PKH_102600 | PVX_097905 | PY04351 | PBANKA_110<br>650 | PCHAS_11062<br>0 | 5.43234 | 2.85876 | 5.81727 | 5.37218 | 6.17772 | 5.10413 | 0.68204 | 0.3037357 | 2.85876 | pk | 0.2834379 | 5.81727  | pv |
| PFE0375w | PKH_102530 | PVX_097940 | PY05128 | PBANKA_110<br>720 | PCHAS_11069<br>0 | 0.6811  | 3.32765 | 2.32412 | 5.12408 | 2.97942 | 3.592   | 1.00985 | 0.6825075 | 0.6811  | pf | 0.8531343 | 3.327654 | pk |
| PFE0380c | PKH_102520 | PVX_097945 | PY05126 | PBANKA_110<br>730 | PCHAS_11070<br>0 | 3.06717 | 5.73571 | 3.2637  | 5.89278 | 2.58241 | 1.53079 | 1.2853  | 1.0086554 | 5.73571 | pk | 1.1272993 | 3.263702 | pv |
| PFE0385w | PKH_102510 | PVX_097950 | PY02736 | PBANKA_110<br>740 | PCHAS_11071<br>0 | 0.7438  | 5.94721 | 1.75662 | 2.00278 | 1.09059 | 1.75337 | 0.66906 | 0.3850023 | 5.94721 | pk | 0.4804403 | 1.756622 | pv |
| PFE0390w | PKH_102500 | PVX_097955 | PY02737 | PBANKA_110<br>750 | PCHAS_11072<br>0 | 1.55069 | 3.94555 | 1.72171 | 6.04895 | 3.06063 | 1.25016 | 1.02688 | 0.8410656 | 6.04895 | py | 0.716601  | 3.060631 | pb |
| PFE0395c | PKH_102490 | PVX_097960 | PY02738 | PBANKA_110<br>760 | PCHAS_11073<br>0 | 5.44437 | 4.28953 | 4.11737 | 3.99681 | 5.19507 | 5.4323  | 0.61134 | 0.4939522 | 3.99681 | py | 0.6174402 | 5.19507  | pb |
| PFE0400w | PKH_102480 | PVX_097965 | PY02739 | PBANKA_110<br>770 | PCHAS_11074<br>0 | 5.36009 | 5.16573 | 4.69941 | 5.16419 | 5.36509 | 5.6093  | 0.21752 | 0.1288927 | 4.69941 | pv | 0.11214   | 5.164188 | py |

|          |            |            |         |               |              |         |         |         |         |         |         |         |           |         |    |           |          |    |
|----------|------------|------------|---------|---------------|--------------|---------|---------|---------|---------|---------|---------|---------|-----------|---------|----|-----------|----------|----|
| PFE0410w | PKH_102460 | PVX_097975 | PY00389 | PBANKA_110790 | PCHAS_110760 | 3.1955  | 1.0147  | 4.93155 | 5.7048  | 0.53325 | 3.46373 | 1.37139 | 1.1438087 | 3.1955  | pf | 1.0314897 | 1.0147   | pk |
| PFE0430w | PKH_102420 | PVX_097995 | PY05239 | PBANKA_110830 | PCHAS_110800 | 2.24724 | 3.01814 | 2.34719 | 2.5588  | 2.69379 | 2.55156 | 0.18746 | 0.1316319 | 3.01814 | pk | 0.113448  | 2.347193 | pv |
| PFE0435c | PKH_102410 | PVX_098000 | PY05238 | PBANKA_110840 | PCHAS_110810 | 4.50973 | 1.18774 | 3.70477 | 3.14456 | 3.39568 | 3.20164 | 0.67938 | 0.3736615 | 1.18774 | pk | 0.3898041 | 3.704771 | pv |
| PFE0445c | PKH_102390 | PVX_098015 | PY04299 | PBANKA_110860 | PCHAS_110830 | 3.99717 | 3.97057 | 4.24569 | 5.42571 | 4.44015 | 3.62537 | 0.41974 | 0.217982  | 5.42571 | py | 0.1617335 | 4.44015  | pb |
| PFE0450w | PKH_102380 | PVX_098020 | PY03258 | PBANKA_110870 | PCHAS_110840 | 4.2869  | 5.18303 | 5.01298 | 4.97665 | 5.30496 | 5.00684 | 0.2051  | 0.1008991 | 4.2869  | pf | 0.0836118 | 5.183026 | pk |
| PFE0465c | PKH_102350 | PVX_098025 | PY03255 | PBANKA_110900 | PCHAS_110870 | 1.60571 | 1.32786 | 2.22037 | 1.85642 | 2.19837 | 1.88711 | 0.25264 | 0.1913233 | 1.32786 | pk | 0.1558379 | 2.220373 | pv |
| PFE0475w | PKH_102330 | PVX_098040 | PY03253 | PBANKA_110920 | PCHAS_110890 | 3.10313 | 3.3618  | 0.81142 | 2.10735 | 3.15531 | 1.71246 | 0.8315  | 0.5394617 | 0.81142 | pv | 0.4253809 | 2.107347 | py |
| PFE0480c | PKH_102320 | PVX_098045 | PY03252 | PBANKA_110930 | PCHAS_110900 | 2.95289 | 3.67546 | 2.07443 | 3.15889 | 0.05431 | 5.36094 | 1.18561 | 0.8018157 | 0.05431 | pb | 0.4517595 | 5.360935 | pc |
| PFE0485w | PKH_102310 | PVX_098050 | PY04039 | PBANKA_110940 | PCHAS_110910 | 0.10117 | 3.26663 | 3.45135 | 0.49415 | 2.39988 | 2.82662 | 1.09157 | 0.7647914 | 0.10117 | pf | 0.845988  | 3.26663  | pk |
| PFE0490w | PKH_102300 | PVX_098055 | PY04038 | PBANKA_110950 | PCHAS_110920 | 1.71426 | 4.99096 | 3.81543 | 4.26121 | 3.63255 | 5.99946 | 1.0149  | 0.7084889 | 1.71426 | pf | 0.7031732 | 4.990965 | pk |
| PFE0495w | PKH_102290 | PVX_098060 | PY04036 | PBANKA_110960 | PCHAS_110930 | 4.95094 | 3.6364  | 0.13658 | 5.50054 | 0.23407 | 2.36204 | 1.24803 | 0.8699376 | 2.36204 | pc | 0.6213855 | 3.636396 | pk |
| PFE0505w | PKH_102270 | PVX_098070 | PY03899 | PBANKA_110980 | PCHAS_110950 | 3.02657 | 2.32123 | 2.74973 | 6.1389  | 2.28979 | 2.33001 | 0.60659 | 0.2330557 | 6.1389  | py | 0.2812644 | 2.289787 | pb |
| PFE0520c | PKH_102240 | PVX_098085 | PY05226 | PBANKA_111010 | PCHAS_110980 | 3.92444 | 3.90695 | 5.6109  | 2.79629 | 4.87896 | 4.94972 | 0.80198 | 0.5458447 | 2.79629 | py | 0.6823058 | 4.878964 | pb |
| PFE0545c | PKH_102200 | PVX_080685 | PY04896 | PBANKA_111050 | PCHAS_111020 | 2.82523 | 2.73844 | 5.6264  | 2.78557 | 3.18513 | 3.67675 | 0.68984 | 0.2675742 | 5.6264  | pv | 0.324553  | 2.785567 | py |
| PFE0555w | PKH_102180 | PVX_080675 | PY04895 | PBANKA_111070 | PCHAS_111040 | 4.81789 | 5.90152 | 4.09384 | 3.58694 | 5.01608 | 2.64541 | 0.90155 | 0.6473662 | 2.64541 | pc | 0.5382989 | 5.901521 | pk |
| PFE0560c | PKH_102170 | PVX_080670 | PY04894 | PBANKA_111080 | PCHAS_111050 | 3.23091 | 5.18784 | 4.94015 | 2.96992 | 2.69895 | 2.43689 | 0.87552 | 0.6070452 | 5.18784 | pk | 0.26625   | 4.940149 | pv |
| PFE0625w | PKH_101990 | PVX_080610 | PY04604 | PBANKA_111230 | PCHAS_111190 | 4.13526 | 2.53406 | 3.44329 | 2.76949 | 3.24291 | 4.57786 | 0.60166 | 0.4550012 | 4.57786 | pc | 0.3915385 | 2.534062 | pk |
| PFE0630c | PKH_101980 | PVX_080605 | PY04605 | PBANKA_111240 | PCHAS_111120 | 2.51756 | 2.84625 | 1.79601 | 2.39947 | 3.02747 | 1.78549 | 0.40172 | 0.3564617 | 3.02747 | pb | 0.2920814 | 1.785491 | pc |
| PFE0650c | PKH_101940 | PVX_080585 | PY04625 | PBANKA_111280 | PCHAS_111240 | 5.36814 | 4.69462 | 5.41393 | 2.94144 | 5.25012 | 5.78186 | 0.61296 | 0.2502107 | 2.94144 | py | 0.2832586 | 5.25012  | pb |
| PFE0660c | PKH_101920 | PVX_080575 | PY04622 | PBANKA_111300 | PCHAS_111260 | 3.26577 | 2.35828 | 2.37431 | 0.0468  | 2.5987  | 2.21332 | 0.6034  | 0.2585755 | 0.0468  | py | 0.2671229 | 2.598701 | pb |
| PFE0675c | PKH_101890 | PVX_080560 | PY02821 | PBANKA_111330 | PCHAS_111290 | 3.88319 | 5.10066 | 4.62918 | 3.0848  | 5.03948 | 5.0566  | 0.59993 | 0.3289801 | 3.0848  | py | 0.4112252 | 5.039477 | pb |
| PFE0690c | PKH_101870 | PVX_080550 | PY02819 | PBANKA_111350 | PCHAS_111310 | 3.94695 | 3.13801 | 3.79382 | 3.06216 | 3.47142 | 4.06844 | 0.35627 | 0.2811919 | 3.06216 | py | 0.2708906 | 3.471419 | pb |

|          |            |            |         |                   |                  |         |         |         |         |         |         |         |           |         |    |           |          |    |
|----------|------------|------------|---------|-------------------|------------------|---------|---------|---------|---------|---------|---------|---------|-----------|---------|----|-----------|----------|----|
| PFE0700c | PKH_101850 | PVX_080540 | PY02818 | PBANKA_111<br>370 | PCHAS_11133<br>0 | 6.26093 | 6.18613 | 5.42977 | 6.2108  | 0.57317 | 2.48234 | 0.67602 | 0.3002767 | 2.48234 | pc | 0.180087  | 5.429768 | pv |
| PFE0705c | PKH_101840 | PVX_080535 | PY02817 | PBANKA_111<br>380 | PCHAS_11134<br>0 | 4.46713 | 5.7214  | 4.66808 | 5.68488 | 4.90171 | 3.31284 | 0.64332 | 0.4542155 | 3.31284 | pc | 0.3628466 | 5.721401 | pk |
| PFE0710w | PKH_101830 | PVX_080530 | PY01997 | PBANKA_111<br>390 | PCHAS_11135<br>0 | 3.04033 | 1.66194 | 5.67728 | 1.60522 | 4.2006  | 5.31969 | 1.47784 | 1.2506259 | 5.67728 | pv | 1.2045045 | 1.60522  | py |
| PFE0715w | PKH_101820 | PVX_080525 | PY01996 | PBANKA_111<br>400 | PCHAS_11136<br>0 | 3.49849 | 2.86904 | 2.66104 | 1.87938 | 4.06699 | 5.54314 | 0.94986 | 0.6050136 | 5.54314 | pc | 0.5088513 | 1.87938  | py |
| PFE0730c | PKH_101800 | PVX_080515 | PY07185 | PBANKA_111<br>420 | PCHAS_11138<br>0 | 2.20004 | 1.31581 | 1.36608 | 0.35998 | 1.22001 | 2.63353 | 0.55064 | 0.4595508 | 0.35998 | py | 0.5379219 | 1.220009 | pb |
| PFE0745w | PKH_101770 | PVX_080500 | PY03225 | PBANKA_111<br>450 | PCHAS_11141<br>0 | 2.14711 | 2.59086 | 2.69684 | 2.25078 | 2.13901 | 1.43217 | 0.30337 | 0.2003166 | 1.43217 | pc | 0.1388807 | 2.696842 | pv |
| PFE0765w | PKH_101740 | PVX_080480 | PY00334 | PBANKA_111<br>490 | PCHAS_11145<br>0 | 3.71778 | 1.80787 | 3.23116 | 4.84415 | 3.11806 | 2.22925 | 0.77299 | 0.582364  | 4.84415 | py | 0.7279549 | 3.118056 | pb |
| PFE0780w | PKH_101710 | PVX_080465 | PY02013 | PBANKA_111<br>520 | PCHAS_11148<br>0 | 0.79102 | 3.73119 | 0.10865 | 5.99696 | 5.87538 | 2.50722 | 1.10882 | 0.7984562 | 3.73119 | pk | 0.9980702 | 0.108647 | pv |
| PFE0785c | PKH_101700 | PVX_080460 | PY00232 | PBANKA_111<br>530 | PCHAS_11149<br>0 | 5.32136 | 5.95063 | 5.87736 | 5.12118 | 5.57439 | 5.31493 | 0.27415 | 0.2031267 | 5.95063 | pk | 0.1149084 | 5.877357 | pv |
| PFE0790c | PKH_101690 | PVX_080455 | PY00231 | PBANKA_111<br>540 | PCHAS_11150<br>0 | 2.79197 | 2.90124 | 2.10493 | 5.42709 | 3.18385 | 1.9864  | 0.77148 | 0.3987516 | 5.42709 | py | 0.4004697 | 3.183845 | pb |
| PFE0795c | PKH_101680 | PVX_080450 | PY00230 | PBANKA_111<br>550 | PCHAS_11151<br>0 | 3.83314 | 4.45818 | 2.32751 | 0.98193 | 4.35224 | 1.25692 | 1.3462  | 1.0451973 | 0.98193 | py | 1.1767231 | 4.352239 | pb |
| PFE0800w | PKH_101670 | PVX_080445 | PY01634 | PBANKA_123<br>090 | PCHAS_12315<br>0 | 2.81303 | 2.94637 | 2.12421 | 0.22521 | 2.22768 | 1.74509 | 0.64876 | 0.378021  | 0.22521 | py | 0.4725262 | 2.227681 | pb |
| PFE0810c | PKH_101660 | PVX_080440 | PY01636 | PBANKA_123<br>100 | PCHAS_12316<br>0 | 2.23811 | 1.95264 | 2.49466 | 2.12986 | 2.64153 | 1.93584 | 0.22599 | 0.1688592 | 2.64153 | pb | 0.1625689 | 1.935842 | pc |
| PFE0815w | PKH_101650 | PVX_080435 | PY03314 | PBANKA_123<br>110 | PCHAS_12317<br>0 | 1.73808 | 2.3104  | 1.95463 | 2.59954 | 2.53967 | 0.6     | 0.52615 | 0.2892999 | 0.6     | pc | 0.2893405 | 2.599541 | py |
| PFE0820c | PKH_101640 | PVX_080430 | PY03313 | PBANKA_123<br>120 | PCHAS_12318<br>0 | 4.76614 | 0.13204 | 5.11162 | 4.48885 | 3.0047  | 4.22074 | 0.76312 | 0.5304652 | 0.13204 | pk | 0.5073878 | 5.11162  | pv |
| PFE0825w | PKH_101630 | PVX_080425 | PY03312 | PBANKA_123<br>130 | PCHAS_12319<br>0 | 0.9759  | 5.28552 | 0.54987 | 0.51211 | 5.68538 | 5.1595  | 0.79284 | 0.6366671 | 0.9759  | pf | 0.6958676 | 5.285516 | pk |
| PFE0830c | PKH_101620 | PVX_080420 | PY03311 | PBANKA_123<br>140 | PCHAS_12320<br>0 | 3.6101  | 2.66542 | 2.46216 | 2.67301 | 4.36537 | 1.89761 | 0.60388 | 0.3846673 | 4.36537 | pb | 0.2888808 | 1.89761  | pc |
| PFE0835w | PKH_101610 | PVX_080415 | PY03802 | PBANKA_123<br>150 | PCHAS_12321<br>0 | 6.16319 | 0.168   | 1.88908 | 2.11424 | 2.59526 | 1.94906 | 0.78691 | 0.5304834 | 6.16319 | pf | 0.2178395 | 0.168002 | pk |
| PFE0840c | PKH_101600 | PVX_080410 | PY03803 | PBANKA_123<br>160 | PCHAS_12322<br>0 | 4.82367 | 5.10455 | 5.29086 | 6.1901  | 0.50195 | 0.70806 | 0.79124 | 0.6094036 | 0.70806 | pc | 0.644958  | 4.82367  | pf |
| PFE0850c | PKH_101580 | PVX_080400 | PY04344 | PBANKA_123<br>180 | PCHAS_12324<br>0 | 2.39257 | 1.44814 | 2.4868  | 2.59348 | 2.98959 | 3.31161 | 0.42786 | 0.2843665 | 1.44814 | pk | 0.3287893 | 2.4868   | pv |
| PFE0870w | PKH_101540 | PVX_080380 | PY05380 | PBANKA_123<br>220 | PCHAS_12328<br>0 | 3.38835 | 3.63946 | 3.92628 | 4.41883 | 2.80289 | 4.28531 | 0.46662 | 0.335264  | 2.80289 | pb | 0.3293219 | 4.285309 | pc |
| PFE0875c | PKH_101530 | PVX_080375 | PY05379 | PBANKA_123<br>230 | PCHAS_12329<br>0 | 1.41276 | 6.00782 | 0.27449 | 4.7726  | 3.67266 | 1.40795 | 1.24861 | 0.9213314 | 3.67266 | pb | 0.8682997 | 1.40795  | pc |

|          |            |            |         |                   |                  |         |         |         |         |         |         |         |           |         |    |           |          |    |
|----------|------------|------------|---------|-------------------|------------------|---------|---------|---------|---------|---------|---------|---------|-----------|---------|----|-----------|----------|----|
| PFE0885w | PKH_101510 | PVX_080365 | PY01620 | PBANKA_123<br>250 | PCHAS_12331<br>0 | 2.09037 | 0.43265 | 2.45469 | 2.47423 | 2.33246 | 1.97748 | 0.46015 | 0.1722154 | 0.43265 | pk | 0.1847109 | 2.454695 | pv |
| PFE0900w | PKH_101470 | PVX_080345 | PY01617 | PBANKA_123<br>280 | PCHAS_12334<br>0 | 1.27406 | 3.77818 | 4.21973 | 5.39238 | 3.85028 | 3.78662 | 0.77059 | 0.4094618 | 1.27406 | pf | 0.4938019 | 3.778175 | pk |
| PFE0905w | PKH_101460 | PVX_080340 | PY01616 | PBANKA_123<br>290 | PCHAS_12335<br>0 | 3.15185 | 4.22418 | 3.06402 | 1.44786 | 3.51122 | 3.5188  | 0.59841 | 0.3054226 | 1.44786 | py | 0.3817782 | 3.511223 | pb |
| PFE0915c | PKH_101440 | PVX_080330 | PY02685 | PBANKA_123<br>310 | PCHAS_12337<br>0 | 3.75526 | 4.03513 | 3.57914 | 0.44871 | 3.6588  | 2.50198 | 0.79706 | 0.3418542 | 0.44871 | py | 0.4273177 | 3.658799 | pb |
| PFE0925c | PKH_101420 | PVX_080320 | PY04051 | PBANKA_123<br>330 | PCHAS_12339<br>0 | 2.46748 | 5.56367 | 3.77352 | 2.16496 | 2.9799  | 2.54892 | 0.85595 | 0.4241947 | 5.56367 | pk | 0.2240939 | 3.773516 | pv |
| PFE0960w | PKH_101330 | PVX_080290 | PY06065 | PBANKA_123<br>390 | PCHAS_12345<br>0 | 4.60077 | 0.50078 | 3.95292 | 3.2589  | 3.504   | 3.88377 | 0.78183 | 0.3581567 | 0.50078 | pk | 0.4304082 | 3.952918 | pv |
| PFE0965c | PKH_101320 | PVX_080285 | PY06066 | PBANKA_123<br>400 | PCHAS_12346<br>0 | 4.65163 | 5.21824 | 4.61569 | 6.25187 | 3.89834 | 5.30161 | 0.60101 | 0.4011619 | 6.25187 | py | 0.3131313 | 3.898344 | pb |
| PFE0975c | PKH_101300 | PVX_080275 | PY06213 | PBANKA_123<br>420 | PCHAS_12348<br>0 | 2.29556 | 2.91015 | 2.35581 | 3.00043 | 2.78096 | 2.37089 | 0.27821 | 0.2079489 | 3.00043 | py | 0.1574172 | 2.780961 | pb |
| PFE0980c | PKH_101290 | PVX_080270 | PY04723 | PBANKA_123<br>430 | PCHAS_12349<br>0 | 2.88576 | 4.80519 | 4.54451 | 1.08798 | 2.73574 | 2.29892 | 1.0188  | 0.8630074 | 1.08798 | py | 1.0412538 | 2.735735 | pb |
| PFE0990w | PKH_101270 | PVX_080260 | PY00700 | PBANKA_123<br>450 | PCHAS_12351<br>0 | 1.5032  | 0.22745 | 5.18653 | 2.45213 | 5.54534 | 0.99378 | 1.09269 | 0.8662957 | 2.45213 | py | 0.8415443 | 5.545336 | pb |
| PFE0995c | PKH_101260 | PVX_080255 | PY03310 | PBANKA_123<br>460 | PCHAS_12352<br>0 | 2.1911  | 1.1389  | 2.51019 | 2.008   | 2.8473  | 1.62871 | 0.46216 | 0.3441566 | 1.1389  | pk | 0.3504232 | 2.510187 | pv |
| PFE1005w | PKH_101240 | PVX_080245 | PY02191 | PBANKA_123<br>480 | PCHAS_12354<br>0 | 2.28146 | 2.16132 | 2.49388 | 2.45865 | 1.77716 | 2.03229 | 0.21054 | 0.1517842 | 1.77716 | pb | 0.1274393 | 2.032295 | pc |
| PFE1010w | PKH_101230 | PVX_080240 | PY02192 | PBANKA_123<br>490 | PCHAS_12355<br>0 | 2.02302 | 2.9933  | 1.75281 | 5.12536 | 1.77088 | 1.93774 | 0.7647  | 0.2985273 | 5.12536 | py | 0.3314441 | 1.770878 | pb |
| PFE1015c | PKH_101220 | PVX_080235 | PY04490 | PBANKA_123<br>500 | PCHAS_12356<br>0 | 2.72697 | 2.6519  | 2.81793 | 1.4109  | 2.33239 | 2.29923 | 0.35904 | 0.1826533 | 1.4109  | py | 0.1484396 | 2.332391 | pb |
| PFE1020w | PKH_101210 | PVX_080230 | PY04489 | PBANKA_123<br>510 | PCHAS_12357<br>0 | 2.67609 | 2.79366 | 2.61291 | 4.78721 | 3.27903 | 2.08329 | 0.58127 | 0.2752989 | 4.78721 | py | 0.1933889 | 3.27903  | pb |
| PFE1025c | PKH_101200 | PVX_080225 | PY04488 | PBANKA_123<br>520 | PCHAS_12358<br>0 | 3.80762 | 4.49578 | 3.67792 | 5.05736 | 3.7415  | 4.50372 | 0.47164 | 0.3160167 | 5.05736 | py | 0.3784907 | 3.741498 | pb |
| PFE1035c | PKH_101160 | PVX_080215 | PY04487 | PBANKA_123<br>530 | PCHAS_12359<br>0 | 1.73259 | 2.89219 | 0.85941 | 6.03203 | 3.77512 | 3.43774 | 1.29345 | 0.9241725 | 6.03203 | py | 0.9344827 | 3.775121 | pb |
| PFE1050w | PKH_101130 | PVX_080200 | PY02893 | PBANKA_123<br>560 | PCHAS_12362<br>0 | 3.89077 | 2.9664  | 2.54447 | 3.25905 | 3.0565  | 3.55648 | 0.35649 | 0.2609313 | 3.89077 | pf | 0.3036395 | 2.966398 | pk |
| PFE1070c | PKH_101090 | PVX_080180 | PY03799 | PBANKA_123<br>590 | PCHAS_12365<br>0 | 1.40782 | 5.11481 | 2.84197 | 1.09025 | 3.32024 | 3.12767 | 1.03711 | 0.789968  | 5.11481 | pk | 0.98746   | 2.841972 | pv |
| PFE1075c | PKH_101080 | PVX_080175 | PY00872 | PBANKA_123<br>600 | PCHAS_12366<br>0 | 3.12209 | 2.86346 | 2.82591 | 3.66856 | 3.44212 | 2.75617 | 0.29787 | 0.1964262 | 3.66856 | py | 0.100868  | 3.442121 | pb |
| PFE1080w | PKH_101070 | PVX_080170 | PY00873 | PBANKA_123<br>610 | PCHAS_12367<br>0 | 2.9562  | 2.80047 | 2.19943 | 2.6172  | 2.35881 | 2.35945 | 0.2427  | 0.1718869 | 2.9562  | pf | 0.104603  | 2.80047  | pk |
| PFE1085w | PKH_101050 | PVX_080160 | PY01366 | PBANKA_123<br>630 | PCHAS_12369<br>0 | 1.99925 | 2.34166 | 3.1175  | 2.82632 | 2.20393 | 2.5393  | 0.32305 | 0.2324877 | 3.1175  | pv | 0.1694461 | 2.826318 | py |



|          |            |            |         |                   |                  |         |         |         |         |         |         |         |           |         |    |           |          |    |
|----------|------------|------------|---------|-------------------|------------------|---------|---------|---------|---------|---------|---------|---------|-----------|---------|----|-----------|----------|----|
| PFE1120w | PKH_100980 | PVX_080130 | PY06434 | PBANKA_123<br>710 | PCHAS_12376<br>0 | 5.55529 | 5.38416 | 5.38957 | 5.20701 | 5.11563 | 6.0295  | 0.21126 | 0.1244424 | 6.0295  | pc | 0.0884197 | 5.11563  | pb |
| PFE1125w | PKH_100970 | PVX_080125 | PY00041 | PBANKA_123<br>720 | PCHAS_12377<br>0 | 4.50638 | 3.93332 | 3.6252  | 5.39514 | 3.63573 | 4.16739 | 0.47911 | 0.2825695 | 5.39514 | py | 0.2788151 | 3.63573  | pb |
| PFE1130w | PKH_100960 | PVX_080120 | PY00042 | PBANKA_123<br>730 | PCHAS_12378<br>0 | 5.47269 | 5.76664 | 5.39956 | 4.82367 | 0.0488  | 5.51687 | 0.31993 | 0.2120566 | 0.0488  | pb | 0.2540249 | 5.516873 | pc |
| PFE1140c | PKH_100940 | PVX_080110 | PY00044 | PBANKA_123<br>750 | PCHAS_12380<br>0 | 2.42278 | 2.76277 | 2.38843 | 6.28151 | 3.05938 | 3.4497  | 0.74372 | 0.3395722 | 6.28151 | py | 0.3503132 | 3.059377 | pb |
| PFE1145w | PKH_100930 | PVX_080105 | PY06948 | PBANKA_123<br>760 | PCHAS_12381<br>0 | 0.38435 | 3.38529 | 3.27273 | 0.089   | 6.03338 | 2.32425 | 1.45979 | 1.1515583 | 3.38529 | pk | 0.7173511 | 3.272734 | pv |
| PFE1150w | PKH_100920 | PVX_080100 | PY00245 | PBANKA_123<br>780 | PCHAS_12382<br>0 | 0.91885 | 1.36146 | 1.75241 | 2.06859 | 1.72333 | 1.51191 | 0.29202 | 0.1895273 | 0.91885 | pf | 0.1464395 | 1.361456 | pk |
| PFE1155c | PKH_100910 | PVX_080095 | PY00244 | PBANKA_123<br>790 | PCHAS_12383<br>0 | 3.21136 | 3.9725  | 0.37825 | 5.2149  | 3.88967 | 4.36325 | 0.86101 | 0.4954237 | 0.37825 | pv | 0.3086802 | 5.214901 | py |
| PFE1160w | PKH_100900 | PVX_080090 | PY00243 | PBANKA_123<br>800 | PCHAS_12384<br>0 | 2.65367 | 3.51452 | 2.67544 | 1.73151 | 1.86783 | 1.01252 | 0.7053  | 0.5170153 | 3.51452 | pk | 0.4443665 | 2.675439 | pv |
| PFE1165c | PKH_100890 | PVX_080085 | PY00242 | PBANKA_123<br>810 | PCHAS_12385<br>0 | 4.90516 | 4.18703 | 4.73029 | 5.43222 | 4.86031 | 4.49887 | 0.29692 | 0.2159142 | 5.43222 | py | 0.237387  | 4.860308 | pb |
| PFE1170w | PKH_100880 | PVX_080080 | PY03711 | PBANKA_123<br>820 | PCHAS_12386<br>0 | 5.38638 | 0.46874 | 5.11715 | 2.58608 | 1.41679 | 3.12367 | 1.45344 | 1.2422177 | 2.58608 | py | 0.9743731 | 1.416793 | pb |
| PFE1175w | PKH_100860 | PVX_080070 | PY03712 | PBANKA_123<br>840 | PCHAS_12388<br>0 | 4.25255 | 4.87166 | 5.60956 | 4.81788 | 4.61422 | 4.84928 | 0.27431 | 0.1708323 | 5.60956 | pv | 0.2135404 | 4.817884 | py |
| PFE1185w | PKH_100840 | PVX_080060 | PY04720 | PBANKA_123<br>860 | PCHAS_12390<br>0 | 1.02177 | 1.57947 | 2.29876 | 0.22442 | 5.04438 | 0.58864 | 0.88763 | 0.6130352 | 5.04438 | pb | 0.6580103 | 0.58864  | pc |
| PFE1195w | PKH_100820 | PVX_080050 | PY00155 | PBANKA_123<br>880 | PCHAS_12392<br>0 | 2.25585 | 1.29154 | 2.45797 | 1.65639 | 1.30258 | 2.21938 | 0.44712 | 0.3762218 | 2.45797 | pv | 0.4702773 | 1.656386 | py |
| PFE1210c | PKH_100790 | PVX_080035 | PY00157 | PBANKA_123<br>910 | PCHAS_12395<br>0 | 2.45829 | 2.54355 | 2.8948  | 0.23643 | 2.71912 | 1.87065 | 0.59869 | 0.2569982 | 0.23643 | py | 0.2773537 | 2.719124 | pb |
| PFE1230c | PKH_100750 | PVX_080015 | PY06872 | PBANKA_123<br>950 | PCHAS_12399<br>0 | 2.45854 | 2.15944 | 2.06889 | 2.5605  | 3.03078 | 0.82127 | 0.50004 | 0.2725893 | 0.82127 | pc | 0.1976766 | 3.030783 | pb |
| PFE1240w | PKH_100720 | PVX_080000 | PY05984 | PBANKA_123<br>970 | PCHAS_12401<br>0 | 1.85465 | 1.56464 | 1.53851 | 2.08037 | 1.27318 | 1.47303 | 0.20249 | 0.1346171 | 2.08037 | py | 0.1019376 | 1.273178 | pb |
| PFE1245w | PKH_100710 | PVX_079995 | PY06412 | PBANKA_123<br>980 | PCHAS_12402<br>0 | 2.64873 | 1.18659 | 3.92727 | 0.40045 | 1.48516 | 1.67196 | 0.86263 | 0.5467307 | 3.92727 | pv | 0.4122359 | 0.400446 | py |
| PFE1250w | PKH_100700 | PVX_079990 | PY01239 | PBANKA_123<br>990 | PCHAS_12403<br>0 | 5.53779 | 6.00942 | 2.7172  | 3.97897 | 3.1432  | 1.93197 | 1.28897 | 0.9735164 | 6.00942 | pk | 1.1103954 | 2.717199 | pv |
| PFE1260c | PKH_100680 | PVX_079980 | PY06789 | PBANKA_124<br>010 | PCHAS_12405<br>0 | 6.09871 | 5.94032 | 6.11227 | 0.04176 | 6.00326 | 6.02037 | 0.09533 | 0.0534796 | 0.04176 | py | 0.0625732 | 6.003264 | pb |
| PFE1270c | PKH_100660 | PVX_079970 | PY02111 | PBANKA_124<br>030 | PCHAS_12407<br>0 | 1.84724 | 0.41117 | 2.25097 | 1.54113 | 1.32508 | 3.50653 | 0.72123 | 0.4723915 | 3.50653 | pc | 0.3079995 | 0.411173 | pk |
| PFE1280w | PKH_100640 | PVX_079960 | PY03649 | PBANKA_124<br>050 | PCHAS_12409<br>0 | 4.61108 | 3.31097 | 3.7616  | 4.95624 | 3.38322 | 5.29528 | 0.73447 | 0.5746252 | 5.29528 | pc | 0.6056251 | 3.310972 | pk |
| PFE1285w | PKH_100630 | PVX_079955 | PY03650 | PBANKA_124<br>060 | PCHAS_12410<br>0 | 6.02358 | 0.12723 | 5.8745  | 5.43204 | 5.79787 | 5.9776  | 0.21787 | 0.1542547 | 0.12723 | pk | 0.1928183 | 5.874499 | pv |

|            |            |            |         |               |              |         |         |         |         |         |         |         |           |         |    |           |          |    |
|------------|------------|------------|---------|---------------|--------------|---------|---------|---------|---------|---------|---------|---------|-----------|---------|----|-----------|----------|----|
| PFE1290w   | PKH_100620 | PVX_079950 | PY06724 | PBANKA_124070 | PCHAS_124110 | 1.20826 | 0.4427  | 0.29023 | 6.25724 | 1.18158 | 5.69657 | 0.52581 | 0.4251105 | 5.69657 | pc | 0.3399985 | 1.208257 | pf |
| PFE1300w   | PKH_100600 | PVX_079940 | PY03865 | PBANKA_124090 | PCHAS_124130 | 3.48052 | 3.61391 | 2.28192 | 6.13731 | 2.73105 | 2.36154 | 0.88798 | 0.4901931 | 6.13731 | py | 0.6127414 | 2.731048 | pb |
| PFE1305c-a | PKH_100590 | PVX_079935 | PY03864 | PBANKA_124100 | PCHAS_124140 | 4.62746 | 3.94917 | 3.76272 | 0.92741 | 2.25976 | 1.78817 | 1.22734 | 0.9057402 | 0.92741 | py | 0.7564353 | 2.259759 | pb |
| PFE1310c   | PKH_100580 | PVX_079930 | PY03863 | PBANKA_124110 | PCHAS_124150 | 1.52959 | 0.02556 | 3.36458 | 5.84085 | 4.72332 | 5.47468 | 1.06663 | 0.8123388 | 1.52959 | pf | 0.8069077 | 0.025557 | pk |
| PFE1320w   | PKH_100560 | PVX_079920 | PY07355 | PBANKA_124130 | PCHAS_124170 | 1.7393  | 3.20801 | 2.89004 | 0.84359 | 4.35398 | 1.87563 | 0.99892 | 0.7030318 | 4.35398 | pb | 0.8787898 | 1.875631 | pc |
| PFE1330c   | PKH_100530 | PVX_079905 | PY03733 | PBANKA_124150 | PCHAS_124190 | 3.66885 | 3.14655 | 3.54012 | 1.42539 | 3.39146 | 3.03658 | 0.49865 | 0.2051684 | 1.42539 | py | 0.2564605 | 3.39146  | pb |
| PFE1340w   | PKH_100510 | PVX_079895 | PY03735 | PBANKA_124170 | PCHAS_124210 | 1.82105 | 4.7606  | 4.59932 | 2.2308  | 3.80249 | 2.61794 | 1.0821  | 0.9022351 | 1.82105 | pf | 0.8882674 | 4.760601 | pk |
| PFE1345c   | PKH_100500 | PVX_079890 | PY03736 | PBANKA_124180 | PCHAS_124220 | 4.37089 | 4.88415 | 5.1555  | 4.76397 | 5.16824 | 4.82111 | 0.20865 | 0.1477292 | 4.37089 | pf | 0.1846615 | 4.884152 | pk |
| PFE1355c   | PKH_100480 | PVX_079880 | PY03738 | PBANKA_124200 | PCHAS_124240 | 3.74215 | 3.73854 | 5.97398 | 3.12231 | 3.27734 | 3.6209  | 0.57235 | 0.2162076 | 5.97398 | pv | 0.1456113 | 3.12231  | py |
| PFE1370w   | PKH_100450 | PVX_079865 | PY00398 | PBANKA_124230 | PCHAS_124270 | 2.8503  | 3.16547 | 2.59699 | 2.64949 | 2.6195  | 1.51889 | 0.32165 | 0.1598553 | 1.51889 | pc | 0.0708243 | 3.165469 | pk |
| PFE1390w   | PKH_100430 | PVX_079855 | PY01284 | PBANKA_124250 | PCHAS_124290 | 1.82856 | 3.79457 | 1.76651 | 2.27276 | 2.39674 | 1.3446  | 0.5874  | 0.3116775 | 3.79457 | pk | 0.3740831 | 1.766506 | pv |
| PFE1395c   | PKH_100420 | PVX_079850 | PY01283 | PBANKA_124260 | PCHAS_124300 | 3.63129 | 3.74245 | 3.57359 | 2.08728 | 3.46172 | 0.99999 | 0.73306 | 0.3649489 | 0.99999 | pc | 0.0846097 | 2.087285 | py |
| PFE1400c   | PKH_100410 | PVX_079845 | PY01282 | PBANKA_124270 | PCHAS_124310 | 1.5335  | 3.97658 | 4.22337 | 3.01695 | 2.39392 | 1.93353 | 0.89266 | 0.7053015 | 4.22337 | pv | 0.7258686 | 3.016952 | py |
| PFE1405c   | PKH_100400 | PVX_079840 | PY01281 | PBANKA_124280 | PCHAS_124320 | 2.1977  | 1.62913 | 2.39257 | 1.18642 | 2.2343  | 2.57775 | 0.36523 | 0.2286961 | 1.18642 | py | 0.2858701 | 2.234303 | pb |
| PFE1410c   | PKH_100390 | PVX_079835 | PY01280 | PBANKA_124290 | PCHAS_124330 | 5.98631 | 5.93477 | 5.74563 | 6.07022 | 0.53503 | 5.5211  | 0.27887 | 0.1579586 | 0.53503 | pb | 0.0940302 | 5.521102 | pc |
| PFE1415w   | PKH_100380 | PVX_079830 | PY06597 | PBANKA_124300 | PCHAS_124340 | 5.78225 | 5.75927 | 6.0659  | 4.79911 | 5.75003 | 5.18975 | 0.31142 | 0.1816729 | 4.79911 | py | 0.2247813 | 5.750034 | pb |
| PFE1425c   | PKH_100360 | PVX_079820 | PY00692 | PBANKA_124320 | PCHAS_124360 | 1.75392 | 1.59498 | 0.90219 | 1.78464 | 6.25718 | 1.36631 | 0.48184 | 0.2540144 | 6.25718 | pb | 0.2603519 | 1.366312 | pc |
| PFE1430c   | PKH_100350 | PVX_079815 | PY00693 | PBANKA_124330 | PCHAS_124370 | 1.79172 | 3.49854 | 1.74932 | 5.69128 | 2.59725 | 3.20187 | 1.04223 | 0.6318741 | 5.69128 | py | 0.7898427 | 2.59725  | pb |
| PFE1435c   | PKH_100340 | PVX_079810 | PY00694 | PBANKA_124340 | PCHAS_124380 | 1.67585 | 1.46378 | 1.87475 | 1.07601 | 1.23838 | 1.72715 | 0.24993 | 0.1799498 | 1.07601 | py | 0.1155684 | 1.238376 | pb |
| PFE1445c   | PKH_100320 | PVX_079800 | PY00695 | PBANKA_124360 | PCHAS_124400 | 0.39256 | 0.5091  | 4.88229 | 1.72189 | 1.58852 | 3.35538 | 1.19417 | 0.8351211 | 4.88229 | pv | 1.0105595 | 1.72189  | py |
| PFE1450c   | PKH_100310 | PVX_079795 | PY00696 | PBANKA_124370 | PCHAS_124410 | 3.83274 | 2.96635 | 2.71947 | 5.7009  | 3.08833 | 3.30505 | 0.67742 | 0.2903943 | 5.7009  | py | 0.3629929 | 3.088334 | pb |
| PFE1460w   | PKH_100300 | PVX_079790 | PY00697 | PBANKA_124380 | PCHAS_124420 | 3.60488 | 2.55045 | 2.74756 | 5.29942 | 3.2224  | 2.69632 | 0.68873 | 0.3161025 | 5.29942 | py | 0.2764184 | 3.222402 | pb |



|          |            |            |         |                   |                  |         |         |         |         |         |         |         |           |         |    |           |          |    |
|----------|------------|------------|---------|-------------------|------------------|---------|---------|---------|---------|---------|---------|---------|-----------|---------|----|-----------|----------|----|
| PFE1470w | PKH_100280 | PVX_079780 | PY02784 | PBANKA_124<br>400 | PCHAS_12444<br>0 | 2.54901 | 3.08575 | 2.6607  | 2.0451  | 3.0436  | 1.46889 | 0.45451 | 0.307048  | 1.46889 | pc | 0.229911  | 2.045104 | py |
| PFE1480c | PKH_100270 | PVX_079775 | PY05156 | PBANKA_124<br>410 | PCHAS_12445<br>0 | 3.29912 | 3.35282 | 2.58828 | 3.03085 | 2.59468 | 1.70622 | 0.4656  | 0.2937952 | 1.70622 | pc | 0.2867506 | 3.35282  | pk |
| PFE1490c | PKH_100250 | PVX_079770 | PY05158 | PBANKA_124<br>430 | PCHAS_12447<br>0 | 0.37076 | 5.60683 | 5.25185 | 0.03769 | 1.24334 | 0.0337  | 0.5543  | 0.4232289 | 1.24334 | pb | 0.5290362 | 0.033701 | pc |
| PFE1505w | PKH_100190 | PVX_079760 | PY01811 | PBANKA_124<br>450 | PCHAS_12449<br>0 | 0.02573 | 6.25973 | 1.356   | 2.61291 | 1.10887 | 1.10536 | 0.66169 | 0.4925177 | 2.61291 | py | 0.6147707 | 1.108865 | pb |
| PFE1510c | PKH_100180 | PVX_079755 | PY01812 | PBANKA_124<br>460 | PCHAS_12450<br>0 | 4.22785 | 4.63009 | 3.72921 | 5.48634 | 2.66587 | 2.95916 | 0.83167 | 0.6465829 | 5.48634 | py | 0.5423918 | 2.665867 | pb |
| PFE1515w | PKH_100170 | PVX_079750 | PY01813 | PBANKA_124<br>470 | PCHAS_12451<br>0 | 5.15719 | 5.81832 | 5.18506 | 1.86352 | 5.26404 | 5.58315 | 0.65698 | 0.2118439 | 1.86352 | py | 0.2648048 | 5.264037 | pb |
| PFE1520c | PKH_100160 | PVX_079745 | PY01814 | PBANKA_124<br>480 | PCHAS_12452<br>0 | 2.81771 | 3.55014 | 4.40844 | 3.89123 | 2.94558 | 1.97794 | 0.68476 | 0.5072755 | 1.97794 | pc | 0.4195188 | 4.408442 | pv |
| PFE1530c | PKH_100140 | PVX_079735 | PY02808 | PBANKA_124<br>500 | PCHAS_12454<br>0 | 2.00666 | 5.25903 | 2.25209 | 1.09601 | 2.38375 | 1.77174 | 0.79982 | 0.3536151 | 5.25903 | pk | 0.3806634 | 2.252085 | pv |
| PFE1545c | PKH_100110 | PVX_079720 | PY01292 | PBANKA_124<br>530 | PCHAS_12457<br>0 | 5.37052 | 5.72401 | 5.55252 | 4.7353  | 5.3508  | 0.08351 | 0.36443 | 0.2380857 | 0.08351 | pc | 0.1388001 | 4.735295 | py |
| PFE1565w | PKH_100070 | PVX_079700 | PY02967 | PBANKA_124<br>570 | PCHAS_12461<br>0 | 4.90728 | 4.14707 | 5.42256 | 3.83946 | 2.81242 | 3.72433 | 0.68345 | 0.55321   | 2.81242 | pb | 0.5858289 | 3.724334 | pc |
| PFE1570c | PKH_100060 | PVX_079695 | PY02965 | PBANKA_124<br>580 | PCHAS_12462<br>0 | 1.75732 | 2.30884 | 1.12529 | 6.16568 | 0.85344 | 1.962   | 0.69449 | 0.4584221 | 6.16568 | py | 0.3470562 | 0.853438 | pb |
| PFF0095c | PKH_114790 | PVX_113265 | PY02270 | PBANKA_010<br>080 | PCHAS_01015<br>0 | 0.23282 | 3.84929 | 6.01448 | 1.65676 | 0.06271 | 1.76868 | 1.04969 | 0.7262887 | 3.84929 | pk | 0.7824788 | 6.014478 | pv |
| PFF0100w | PKH_114780 | PVX_113270 | PY01861 | PBANKA_010<br>090 | PCHAS_01016<br>0 | 2.04768 | 2.59032 | 2.33533 | 2.03902 | 0.69049 | 1.48852 | 0.45922 | 0.2796206 | 0.69049 | pb | 0.2097372 | 1.488525 | pc |
| PFF0105w | PKH_114770 | PVX_113275 | PY01862 | PBANKA_010<br>100 | PCHAS_01017<br>0 | 2.35399 | 2.4419  | 0.67019 | 1.84374 | 3.10638 | 2.24131 | 0.5245  | 0.2926457 | 0.67019 | pv | 0.2382448 | 1.843737 | py |
| PFF0120w | PKH_114740 | PVX_113290 | PY07078 | PBANKA_010<br>130 | PCHAS_01020<br>0 | 2.67443 | 2.89665 | 2.57785 | 1.08785 | 2.87969 | 3.43539 | 0.4786  | 0.2159537 | 1.08785 | py | 0.2699422 | 2.879694 | pb |
| PFF0125c | PKH_114730 | PVX_113295 | PY00220 | PBANKA_010<br>140 | PCHAS_01021<br>0 | 1.61634 | 0.05685 | 3.38591 | 1.84216 | 1.7034  | 2.30502 | 0.69275 | 0.4742361 | 0.05685 | pk | 0.2068579 | 3.385906 | pv |
| PFF0130c | PKH_114720 | PVX_113300 | PY00219 | PBANKA_010<br>150 | PCHAS_01022<br>0 | 1.37504 | 3.81276 | 0.67809 | 1.91045 | 1.52497 | 0.57029 | 0.77079 | 0.4374064 | 3.81276 | pk | 0.3725198 | 0.678089 | pv |
| PFF0135w | PKH_114710 | PVX_113305 | PY00218 | PBANKA_010<br>160 | PCHAS_01023<br>0 | 1.33561 | 1.6973  | 2.58175 | 2.28085 | 2.31878 | 1.93411 | 0.36906 | 0.2538251 | 1.33561 | pf | 0.1713942 | 1.697303 | pk |
| PFF0145w | PKH_114690 | PVX_113315 | PY00216 | PBANKA_010<br>180 | PCHAS_01025<br>0 | 0.19045 | 3.56281 | 6.18409 | 2.17226 | 1.27189 | 1.38269 | 0.95909 | 0.6927184 | 3.56281 | pk | 0.5231536 | 6.184093 | pv |
| PFF0150c | PKH_114680 | PVX_113320 | PY00215 | PBANKA_010<br>190 | PCHAS_01026<br>0 | 3.91588 | 0.5542  | 2.96602 | 5.35948 | 2.79575 | 3.21255 | 1.02866 | 0.7027174 | 0.5542  | pk | 0.8167623 | 2.966017 | pv |
| PFF0155w | PKH_114670 | PVX_113325 | PY02578 | PBANKA_010<br>200 | PCHAS_01027<br>0 | 3.5599  | 2.5878  | 2.44666 | 3.74864 | 3.5883  | 2.91143 | 0.49183 | 0.3675435 | 2.44666 | pv | 0.4122435 | 3.748642 | py |
| PFF0160c | PKH_114660 | PVX_113330 | PY02580 | PBANKA_010<br>210 | PCHAS_01028<br>0 | 2.48274 | 3.13099 | 2.57269 | 2.15377 | 1.89384 | 1.08922 | 0.50827 | 0.3312147 | 1.08922 | pc | 0.2519559 | 3.130987 | pk |

|          |            |            |         |               |              |         |         |         |         |         |         |         |           |         |    |           |          |    |
|----------|------------|------------|---------|---------------|--------------|---------|---------|---------|---------|---------|---------|---------|-----------|---------|----|-----------|----------|----|
| PFF0165c | PKH_114650 | PVX_113335 | PY02581 | PBANKA_010220 | PCHAS_010290 | 2.6647  | 3.0274  | 2.15001 | 2.21994 | 1.45033 | 2.0656  | 0.37435 | 0.2952989 | 1.45033 | pb | 0.3305376 | 2.065599 | pc |
| PFF0170w | PKH_114640 | PVX_113340 | PY00061 | PBANKA_010230 | PCHAS_010300 | 4.4496  | 2.70828 | 3.03594 | 5.11689 | 0.98805 | 4.42027 | 1.11221 | 0.7644539 | 0.98805 | pb | 0.9555674 | 4.420267 | pc |
| PFF0180w | PKH_114620 | PVX_113350 | PY04422 | PBANKA_010250 | PCHAS_010320 | 3.58155 | 2.78792 | 3.19147 | 5.17155 | 3.24506 | 2.54343 | 0.57922 | 0.299051  | 5.17155 | py | 0.3604158 | 3.245057 | pb |
| PFF0190c | PKH_114600 | PVX_113360 | PY03251 | PBANKA_010270 | PCHAS_010340 | 0.8653  | 6.19021 | 0.15924 | 0.81702 | 5.98623 | 5.312   | 0.53378 | 0.4144489 | 5.312   | pc | 0.3415476 | 0.865297 | pf |
| PFF0205w | PKH_114540 | PVX_113375 | PY05526 | PBANKA_010300 | PCHAS_010370 | 3.57049 | 3.32857 | 3.83596 | 5.36425 | 3.89308 | 3.25516 | 0.48985 | 0.2290634 | 5.36425 | py | 0.2056821 | 3.893081 | pb |
| PFF0220w | PKH_114510 | PVX_113390 | PY04822 | PBANKA_010330 | PCHAS_010400 | 1.17104 | 0.45873 | 1.6034  | 2.21497 | 1.68046 | 1.9647  | 0.43783 | 0.2810463 | 0.45873 | pk | 0.3320429 | 1.603399 | pv |
| PFF0230c | PKH_114490 | PVX_113400 | PY04823 | PBANKA_010340 | PCHAS_010410 | 4.18724 | 4.58673 | 3.90668 | 4.55024 | 3.02104 | 4.25035 | 0.37872 | 0.2086088 | 3.02104 | pb | 0.260761  | 4.25035  | pc |
| PFF0240c | PKH_114470 | PVX_113410 | PY03727 | PBANKA_010370 | PCHAS_010430 | 3.34184 | 2.55771 | 0.36728 | 5.40889 | 2.8907  | 3.77277 | 1.11797 | 0.7466496 | 0.36728 | pv | 0.4165492 | 5.408894 | py |
| PFF0250w | PKH_114450 | PVX_113420 | PY04901 | PBANKA_010390 | PCHAS_010450 | 1.12413 | 2.36311 | 2.57848 | 2.56461 | 0.75418 | 4.9183  | 0.97    | 0.6529579 | 4.9183  | pc | 0.4139632 | 0.754176 | pb |
| PFF0260w | PKH_114430 | PVX_113435 | PY05614 | PBANKA_010410 | PCHAS_010470 | 4.4992  | 4.38417 | 5.72228 | 5.31218 | 5.36425 | 4.61016 | 0.4842  | 0.3586112 | 5.72228 | pv | 0.272759  | 5.312183 | py |
| PFF0285c | PKH_114340 | PVX_113460 | PY00626 | PBANKA_010460 | PCHAS_010520 | 3.82857 | 4.98184 | 5.01586 | 4.53865 | 4.84397 | 3.06542 | 0.56817 | 0.3260975 | 3.06542 | pc | 0.153771  | 3.828568 | pf |
| PFF0295c | PKH_114320 | PVX_113470 | PY07550 | PBANKA_010480 | PCHAS_010540 | 0.64552 | 0.4099  | 6.00087 | 0.66869 | 0.38515 | 0.9745  | 0.29599 | 0.1696261 | 6.00087 | pv | 0.2062411 | 0.668687 | py |
| PFF0300w | PKH_114310 | PVX_113475 | PY03159 | PBANKA_010490 | PCHAS_010550 | 1.3798  | 2.0864  | 2.48964 | 1.54746 | 2.82559 | 2.34082 | 0.4404  | 0.3362734 | 1.3798  | pf | 0.3567385 | 2.086402 | pk |
| PFF0305c | PKH_114300 | PVX_113480 | PY03157 | PBANKA_010500 | PCHAS_010560 | 5.75376 | 4.9744  | 2.91759 | 4.90353 | 4.81777 | 5.91458 | 0.66731 | 0.3894048 | 2.91759 | pv | 0.4690402 | 4.903533 | py |
| PFF0315c | PKH_114280 | PVX_113490 | PY01049 | PBANKA_010510 | PCHAS_010570 | 0.66829 | 4.67542 | 0.25555 | 5.88897 | 0.50684 | 0.2908  | 0.53539 | 0.2627592 | 4.67542 | pk | 0.3196353 | 0.255548 | pv |
| PFF0320c | PKH_114270 | PVX_113495 | PY01048 | PBANKA_010520 | PCHAS_010580 | 1.45694 | 2.55865 | 2.21534 | 2.50507 | 1.03755 | 3.06614 | 0.57    | 0.3905016 | 1.03755 | pb | 0.3478595 | 3.066139 | pc |
| PFF0325c | PKH_114260 | PVX_113500 | PY01046 | PBANKA_010530 | PCHAS_010590 | 1.36619 | 2.54953 | 2.38785 | 6.19794 | 1.46379 | 2.0528  | 0.70758 | 0.4214815 | 6.19794 | py | 0.3795976 | 1.463787 | pb |
| PFF0330w | PKH_114250 | PVX_113505 | PY01045 | PBANKA_010540 | PCHAS_010600 | 3.78099 | 0.03931 | 3.29738 | 1.07479 | 2.57723 | 0.70929 | 1.30537 | 1.0252016 | 3.78099 | pf | 1.0226335 | 0.039315 | pk |
| PFF0340c | PKH_114240 | PVX_113510 | PY00223 | PBANKA_010550 | PCHAS_010610 | 2.51937 | 1.89363 | 2.70849 | 6.13607 | 3.25563 | 2.13851 | 0.76641 | 0.3863959 | 6.13607 | py | 0.2989313 | 3.255629 | pb |
| PFF0345w | PKH_114230 | PVX_113515 | PY05837 | PBANKA_010560 | PCHAS_010620 | 2.42265 | 0.09806 | 2.76036 | 2.68932 | 1.92578 | 1.9857  | 0.6438  | 0.3076386 | 0.09806 | pk | 0.3001216 | 2.760357 | pv |
| PFF0355c | PKH_114210 | PVX_113525 | PY00652 | PBANKA_010580 | PCHAS_010640 | 2.09842 | 3.59778 | 3.56976 | 6.22786 | 4.1068  | 3.23359 | 0.83845 | 0.4745152 | 6.22786 | py | 0.4588837 | 4.106803 | pb |
| PFF0365c | PKH_114190 | PVX_113535 | PY02530 | PBANKA_010600 | PCHAS_010660 | 3.22728 | 3.71474 | 3.08889 | 0.12896 | 4.52548 | 4.17293 | 0.84661 | 0.4764487 | 0.12896 | py | 0.3928775 | 4.525475 | pb |

|          |            |            |         |               |              |         |         |         |         |         |         |         |           |         |    |           |          |    |
|----------|------------|------------|---------|---------------|--------------|---------|---------|---------|---------|---------|---------|---------|-----------|---------|----|-----------|----------|----|
| PFF0370w | PKH_114180 | PVX_113540 | PY01399 | PBANKA_010610 | PCHAS_010670 | 2.00531 | 4.53402 | 3.01258 | 5.17258 | 3.98992 | 3.46771 | 0.86849 | 0.6452618 | 2.00531 | pf | 0.6705522 | 4.534016 | pk |
| PFF0375c | PKH_114170 | PVX_113545 | PY01398 | PBANKA_010620 | PCHAS_010680 | 4.70947 | 4.98335 | 5.63297 | 4.39558 | 2.52586 | 3.01963 | 0.89745 | 0.6402212 | 2.52586 | pb | 0.3778179 | 3.019631 | pc |
| PFF0385c | PKH_114150 | PVX_113555 | PY04853 | PBANKA_010640 | PCHAS_010700 | 5.81916 | 2.20749 | 3.47217 | 5.61611 | 3.92961 | 2.16504 | 1.25336 | 1.034639  | 5.81916 | pf | 0.9771275 | 2.207485 | pk |
| PFF0390w | PKH_114140 | PVX_113560 | PY04852 | PBANKA_010650 | PCHAS_010710 | 1.59686 | 1.51704 | 3.4504  | 4.45949 | 3.03307 | 2.93354 | 0.81592 | 0.673916  | 4.45949 | py | 0.8175118 | 3.033074 | pb |
| PFF0415c | PKH_114080 | PVX_113580 | PY03035 | PBANKA_010700 | PCHAS_010760 | 4.35736 | 4.55853 | 4.40006 | 5.46109 | 4.6509  | 4.42534 | 0.24796 | 0.0904011 | 5.46109 | py | 0.0566122 | 4.650899 | pb |
| PFF0420c | PKH_114070 | PVX_113585 | PY03034 | PBANKA_010710 | PCHAS_010770 | 3.58126 | 3.9442  | 3.36775 | 4.08107 | 3.50583 | 3.70085 | 0.21188 | 0.1542943 | 4.08107 | py | 0.1740115 | 3.505833 | pb |
| PFF0435w | PKH_114040 | PVX_113600 | PY00104 | PBANKA_010740 | PCHAS_010800 | 3.4809  | 2.46501 | 2.22255 | 3.79589 | 3.34215 | 2.05742 | 0.64566 | 0.5086157 | 3.79589 | py | 0.4164852 | 3.342153 | pb |
| PFF0440w | PKH_114030 | PVX_113605 | PY00105 | PBANKA_010750 | PCHAS_010810 | 4.61783 | 3.85608 | 4.82141 | 3.49988 | 3.40226 | 2.29472 | 0.68308 | 0.5074219 | 2.29472 | pc | 0.3929435 | 4.821412 | pv |
| PFF0450c | PKH_114010 | PVX_113615 | PY01325 | PBANKA_010770 | PCHAS_010830 | 1.02447 | 4.12788 | 6.02523 | 1.62854 | 1.08766 | 2.91086 | 1.13552 | 0.754579  | 4.12788 | pk | 0.6068188 | 6.02523  | pv |
| PFF0495w | PKH_113900 | PVX_113650 | PY04391 | PBANKA_010850 | PCHAS_010910 | 3.94005 | 3.20784 | 2.98741 | 2.95614 | 2.93192 | 2.72433 | 0.25382 | 0.1078013 | 3.94005 | pf | 0.0718251 | 3.207843 | pk |
| PFF0500c | PKH_113890 | PVX_113655 | PY04392 | PBANKA_010860 | PCHAS_010920 | 2.24925 | 1.92959 | 2.79495 | 2.16977 | 3.24943 | 1.82816 | 0.39435 | 0.2572912 | 3.24943 | pb | 0.2362104 | 1.828159 | pc |
| PFF0515c | PKH_113860 | PVX_113670 | PY00497 | PBANKA_010890 | PCHAS_010950 | 2.23942 | 2.54431 | 2.50484 | 6.00051 | 2.99082 | 4.00038 | 0.84566 | 0.44939   | 6.00051 | py | 0.4501091 | 2.990825 | pb |
| PFF0530w | PKH_113840 | PVX_113675 | PY03111 | PBANKA_010910 | PCHAS_010970 | 1.85983 | 1.65277 | 3.83671 | 2.03504 | 3.3266  | 3.42203 | 0.83962 | 0.6472076 | 3.83671 | pv | 0.8090095 | 2.035039 | py |
| PFF0535c | PKH_113830 | PVX_113680 | PY03112 | PBANKA_010920 | PCHAS_010980 | 1.50567 | 1.52202 | 4.93404 | 2.20793 | 0.81275 | 2.07366 | 0.80572 | 0.3926331 | 4.93404 | pv | 0.3193136 | 2.207927 | py |
| PFF0540c | PKH_113820 | PVX_113685 | PY03114 | PBANKA_010930 | PCHAS_010990 | 4.48514 | 2.76498 | 5.23633 | 4.86596 | 4.01583 | 5.68531 | 0.75361 | 0.4841341 | 2.76498 | pk | 0.5125753 | 5.236329 | pv |
| PFF0545c | PKH_113810 | PVX_113690 | PY03115 | PBANKA_010940 | PCHAS_011000 | 4.70478 | 5.42396 | 4.89702 | 3.95555 | 3.79258 | 4.69781 | 0.42997 | 0.370733  | 5.42396 | pk | 0.4136155 | 4.897015 | pv |
| PFF0550w | PKH_113800 | PVX_113695 | PY03117 | PBANKA_010950 | PCHAS_011010 | 3.78403 | 3.25228 | 3.21987 | 3.92766 | 3.37767 | 3.72182 | 0.26395 | 0.20674   | 3.92766 | py | 0.258425  | 3.377674 | pb |
| PFF0555w | PKH_113790 | PVX_113705 | PY03118 | PBANKA_010960 | PCHAS_011020 | 3.92581 | 3.29043 | 3.65437 | 2.08334 | 3.8393  | 4.16812 | 0.48418 | 0.2298249 | 2.08334 | py | 0.2872812 | 3.8393   | pb |
| PFF0560c | PKH_113780 | PVX_113710 | PY03119 | PBANKA_010970 | PCHAS_011030 | 2.56083 | 3.10688 | 2.58738 | 2.55392 | 3.65573 | 1.6703  | 0.42749 | 0.3295723 | 1.6703  | pc | 0.1448779 | 3.65573  | pb |
| PFF0570c | PKH_113720 | PVX_113725 | PY02915 | PBANKA_010990 | PCHAS_011050 | 5.28664 | 5.32516 | 0.12134 | 4.76752 | 5.45876 | 5.68805 | 0.362   | 0.2185282 | 0.12134 | pv | 0.1337512 | 4.767519 | py |
| PFF0595c | PKH_113660 | PVX_113755 | PY03350 | PBANKA_011050 | PCHAS_011110 | 5.10869 | 5.46241 | 5.72755 | 6.13701 | 5.37736 | 6.00724 | 0.32056 | 0.2608979 | 5.10869 | pf | 0.2598377 | 5.462409 | pk |
| PFF0605c | PKH_113640 | PVX_113765 | PY03102 | PBANKA_011080 | PCHAS_011140 | 0.34393 | 4.43674 | 0.61886 | 0.66848 | 0.38147 | 3.95426 | 0.91671 | 0.5579717 | 3.95426 | pc | 0.1404842 | 4.436737 | pk |

|          |            |            |         |               |              |         |         |         |         |         |         |         |           |         |    |           |          |    |
|----------|------------|------------|---------|---------------|--------------|---------|---------|---------|---------|---------|---------|---------|-----------|---------|----|-----------|----------|----|
| PFF0610c | PKH_113630 | PVX_113770 | PY03101 | PBANKA_011090 | PCHAS_011150 | 5.61786 | 3.52306 | 2.82262 | 2.51423 | 1.25788 | 1.51998 | 1.11191 | 0.7135638 | 5.61786 | pf | 0.6397486 | 3.523058 | pk |
| PFF0615c | PKH_113620 | PVX_113775 | PY03100 | PBANKA_011100 | PCHAS_011160 | 5.49023 | 0.0071  | 5.46659 | 5.39135 | 5.40522 | 5.58028 | 0.18294 | 0.0547896 | 0.0071  | pk | 0.068487  | 5.466595 | pv |
| PFF0620c | PKH_113610 | PVX_113780 | PY03099 | PBANKA_011110 | PCHAS_011170 | 1.74611 | 0.94417 | 1.04084 | 2.64496 | 0.25473 | 6.26714 | 0.70818 | 0.5096531 | 2.64496 | py | 0.4647075 | 0.254732 | pb |
| PFF0625w | PKH_113600 | PVX_113785 | PY03098 | PBANKA_011120 | PCHAS_011180 | 1.988   | 1.68296 | 2.52293 | 1.84771 | 0.83299 | 1.52679 | 0.38599 | 0.2602377 | 0.83299 | pb | 0.2450655 | 1.526785 | pc |
| PFF0635w | PKH_113580 | PVX_113795 | PY04882 | PBANKA_011140 | PCHAS_011200 | 0.2223  | 5.12714 | 4.26921 | 6.11195 | 4.09047 | 5.80302 | 0.82227 | 0.6442171 | 4.09047 | pb | 0.8052714 | 5.803024 | pc |
| PFF0645c | PKH_113570 | PVX_113800 | PY04881 | PBANKA_011160 | PCHAS_011220 | 5.76105 | 5.87345 | 5.54487 | 5.79616 | 5.85682 | 5.65758 | 0.09382 | 0.0623274 | 5.54487 | pv | 0.0779092 | 5.796163 | py |
| PFF0650w | PKH_113560 | PVX_113805 | PY01671 | PBANKA_011170 | PCHAS_011230 | 4.75318 | 5.85041 | 3.96324 | 4.84066 | 4.44365 | 3.97155 | 0.51097 | 0.3318116 | 5.85041 | pk | 0.2946606 | 3.963238 | pv |
| PFF0655c | PKH_113550 | PVX_113810 | PY01672 | PBANKA_011180 | PCHAS_011240 | 2.93421 | 0.59708 | 2.95496 | 5.42533 | 3.18043 | 2.11257 | 0.98614 | 0.6851469 | 5.42533 | py | 0.7948778 | 3.180431 | pb |
| PFF0665c | PKH_113530 | PVX_113820 | PY05107 | PBANKA_011200 | PCHAS_011260 | 4.04335 | 3.04089 | 2.38329 | 0.99698 | 3.78581 | 0.87462 | 1.10253 | 0.8897778 | 0.87462 | pc | 0.6012438 | 0.996976 | py |
| PFF0675c | PKH_113510 | PVX_113830 | PY01085 | PBANKA_011220 | PCHAS_011280 | 5.9434  | 6.24612 | 5.75364 | 5.68329 | 5.92565 | 6.10651 | 0.15558 | 0.1225977 | 6.24612 | pk | 0.1102443 | 5.753636 | pv |
| PFF0690c | PKH_113470 | PVX_113850 | PY00646 | PBANKA_011250 | PCHAS_011310 | 3.62175 | 0.24872 | 1.35003 | 6.04039 | 0.32271 | 0.05949 | 0.79437 | 0.3712075 | 3.62175 | pf | 0.4640094 | 0.248722 | pk |
| PFF0715c | PKH_113420 | PVX_113875 | PY05677 | PBANKA_122950 | PCHAS_123020 | 3.11218 | 1.78877 | 3.28453 | 6.07794 | 2.11545 | 1.11252 | 0.96935 | 0.6990855 | 6.07794 | py | 0.8738569 | 2.115449 | pb |
| PFF0765c | PKH_113320 | PVX_113925 | PY07542 | PBANKA_123060 | PCHAS_123120 | 4.05462 | 2.47729 | 3.84331 | 3.5329  | 3.78505 | 2.23813 | 0.57244 | 0.377546  | 2.23813 | pc | 0.1449922 | 2.477291 | pk |
| PFF0770c | PKH_113310 | PVX_113930 | PY03433 | PBANKA_123070 | PCHAS_123130 | 4.64456 | 3.95663 | 2.93125 | 5.93759 | 2.52221 | 2.66118 | 1.07069 | 0.6835583 | 5.93759 | py | 0.7521892 | 2.522213 | pb |
| PFF0775w | PKH_113300 | PVX_113935 | PY01633 | PBANKA_123080 | PCHAS_123140 | 2.5221  | 2.8735  | 1.3365  | 1.85371 | 3.28793 | 2.28122 | 0.53535 | 0.4052991 | 1.3365  | pv | 0.3395263 | 1.85371  | py |
| PFF0785w | PKH_113280 | PVX_113945 | PY01957 | PBANKA_111570 | PCHAS_111530 | 4.50769 | 5.2704  | 5.14819 | 5.34458 | 5.26715 | 5.03255 | 0.19895 | 0.0868474 | 4.50769 | pf | 0.1077462 | 5.270402 | pk |
| PFF0790c | PKH_113270 | PVX_113950 | PY01959 | PBANKA_111580 | PCHAS_111540 | 1.97542 | 3.00412 | 4.87435 | 1.40582 | 4.3929  | 1.072   | 1.30302 | 0.9838411 | 4.87435 | pv | 1.087399  | 1.405815 | py |
| PFF0795w | PKH_113260 | PVX_113955 | PY01960 | PBANKA_111590 | PCHAS_111550 | 2.41383 | 3.52255 | 3.9481  | 4.33367 | 6.02239 | 5.23621 | 0.9513  | 0.7575899 | 2.41383 | pf | 0.7442058 | 3.522548 | pk |
| PFF0805c | PKH_113240 | PVX_113970 | PY01500 | PBANKA_111610 | PCHAS_111570 | 4.29597 | 3.95266 | 5.96553 | 4.90215 | 3.35443 | 4.12014 | 0.62274 | 0.3782058 | 5.96553 | pv | 0.2772555 | 4.90215  | py |
| PFF0825c | PKH_113200 | PVX_113990 | PY05229 | PBANKA_111650 | PCHAS_111610 | 2.36491 | 2.34266 | 2.03891 | 1.90253 | 2.42242 | 3.87874 | 0.397   | 0.1691796 | 3.87874 | pc | 0.1014422 | 1.902528 | py |
| PFF0840w | PKH_113170 | PVX_114010 | PY05077 | PBANKA_111690 | PCHAS_111640 | 5.24823 | 5.43584 | 4.96912 | 6.16643 | 5.27287 | 4.82034 | 0.30624 | 0.1838488 | 6.16643 | py | 0.2236531 | 5.272865 | pb |
| PFF0870w | PKH_113140 | PVX_114025 | PY05072 | PBANKA_111720 | PCHAS_111670 | 5.75098 | 6.02722 | 2.75895 | 1.58878 | 5.6019  | 5.9309  | 0.94292 | 0.509262  | 2.75895 | pv | 0.1513109 | 1.588784 | py |

|          |            |            |         |                   |                  |         |         |         |         |         |         |         |           |         |    |           |          |    |
|----------|------------|------------|---------|-------------------|------------------|---------|---------|---------|---------|---------|---------|---------|-----------|---------|----|-----------|----------|----|
| PFF0875w | PKH_113130 | PVX_114030 | PY05071 | PBANKA_111<br>730 | PCHAS_11168<br>0 | 5.29343 | 1.66271 | 2.76399 | 4.71062 | 3.94403 | 2.53699 | 1.16406 | 0.9406134 | 1.66271 | pk | 0.8807561 | 2.763986 | pv |
| PFF0895w | PKH_113090 | PVX_114050 | PY03376 | PBANKA_111<br>770 | PCHAS_11172<br>0 | 5.04979 | 3.42745 | 4.75609 | 4.34949 | 4.42236 | 4.35119 | 0.35002 | 0.2210398 | 3.42745 | pk | 0.192868  | 4.756091 | pv |
| PFF0905w | PKH_113070 | PVX_114060 | PY03378 | PBANKA_111<br>790 | PCHAS_11174<br>0 | 3.12156 | 2.91835 | 2.63522 | 3.06746 | 2.59909 | 3.64304 | 0.2799  | 0.1909427 | 3.64304 | pc | 0.1588618 | 2.599089 | pb |
| PFF0910c | PKH_113060 | PVX_114065 | PY03379 | PBANKA_111<br>800 | PCHAS_11175<br>0 | 3.78186 | 1.7583  | 2.55443 | 0.56415 | 1.3135  | 2.39903 | 0.84989 | 0.61516   | 3.78186 | pf | 0.76895   | 1.758299 | pk |
| PFF0915w | PKH_113050 | PVX_114070 | PY03381 | PBANKA_111<br>810 | PCHAS_11176<br>0 | 4.77724 | 4.24703 | 4.66494 | 3.5419  | 4.0299  | 5.48063 | 0.51733 | 0.3740768 | 5.48063 | pc | 0.2913131 | 3.541897 | py |
| PFF0945c | PKH_112980 | PVX_114100 | PY05696 | PBANKA_111<br>870 | PCHAS_11182<br>0 | 2.6218  | 2.65583 | 3.02168 | 0.1773  | 3.16008 | 1.7683  | 0.7117  | 0.3583326 | 0.1773  | py | 0.3218517 | 3.160084 | pb |
| PFF0950w | PKH_112970 | PVX_114105 | PY05697 | PBANKA_111<br>880 | PCHAS_11183<br>0 | 3.06244 | 3.08732 | 4.51213 | 6.27093 | 5.05097 | 2.02881 | 1.2619  | 0.8943677 | 6.27093 | py | 0.6270489 | 5.050966 | pb |
| PFF0960c | PKH_112960 | PVX_114110 | PY07222 | PBANKA_111<br>890 | PCHAS_11184<br>0 | 4.42964 | 2.36131 | 5.24707 | 3.86714 | 2.75993 | 4.24434 | 0.82211 | 0.6099284 | 2.36131 | pk | 0.5117271 | 5.247075 | pv |
| PFF0970w | PKH_112940 | PVX_114120 | PY03246 | PBANKA_111<br>910 | PCHAS_11186<br>0 | 0.65701 | 2.77492 | 1.96963 | 2.6358  | 3.76017 | 5.44056 | 1.11887 | 0.7816877 | 5.44056 | pc | 0.4824127 | 0.657014 | pf |
| PFF0980w | PKH_112920 | PVX_114130 | PY03244 | PBANKA_111<br>930 | PCHAS_11188<br>0 | 4.63883 | 3.42689 | 4.42007 | 5.49229 | 4.27679 | 4.53862 | 0.42433 | 0.2868518 | 3.42689 | pk | 0.3289269 | 4.420073 | pv |
| PFF0995c | PKH_112880 | PVX_114145 | PY04226 | PBANKA_111<br>960 | PCHAS_11191<br>0 | 5.89291 | 6.13371 | 5.4576  | 0.00398 | 5.67688 | 5.49587 | 0.28057 | 0.2146318 | 0.00398 | py | 0.2682898 | 5.676875 | pb |
| PFF1000w | PKH_112870 | PVX_114150 | PY04225 | PBANKA_111<br>970 | PCHAS_11192<br>0 | 1.31327 | 3.02564 | 2.39238 | 3.72169 | 2.40448 | 2.12453 | 0.55361 | 0.3984653 | 3.72169 | py | 0.4950561 | 2.404478 | pb |
| PFF1015w | PKH_112840 | PVX_114170 | PY04477 | PBANKA_112<br>000 | PCHAS_11195<br>0 | 3.04735 | 2.992   | 3.02287 | 1.99798 | 1.85942 | 0.05486 | 0.85833 | 0.4425639 | 0.05486 | pc | 0.270061  | 1.859422 | pb |
| PFF1020c | PKH_112830 | PVX_114175 | PY04476 | PBANKA_112<br>010 | PCHAS_11196<br>0 | 5.58393 | 5.75241 | 5.29598 | 5.1306  | 4.80461 | 4.89373 | 0.30056 | 0.2363123 | 5.75241 | pk | 0.2540457 | 5.29598  | pv |
| PFF1025c | PKH_112820 | PVX_114180 | PY04475 | PBANKA_112<br>020 | PCHAS_11197<br>0 | 2.34447 | 4.84767 | 1.80061 | 2.31779 | 2.72368 | 1.33664 | 0.74346 | 0.3861796 | 4.84767 | pk | 0.3534288 | 1.800609 | pv |
| PFF1040w | PKH_112790 | PVX_114195 | PY04323 | PBANKA_112<br>050 | PCHAS_11200<br>0 | 1.98974 | 2.71136 | 2.14085 | 4.33075 | 2.8905  | 2.06568 | 0.62272 | 0.3092866 | 4.33075 | py | 0.1991951 | 2.890498 | pb |
| PFF1045w | PKH_112780 | PVX_114200 | PY04324 | PBANKA_112<br>060 | PCHAS_11201<br>0 | 2.86257 | 2.72189 | 1.65038 | 1.94654 | 2.25935 | 1.9879  | 0.3765  | 0.2768623 | 2.86257 | pf | 0.1625815 | 2.721887 | pk |
| PFF1060w | PKH_112750 | PVX_114215 | PY01464 | PBANKA_112<br>090 | PCHAS_11204<br>0 | 1.70136 | 4.48563 | 6.25819 | 4.96356 | 6.12643 | 3.75893 | 1.19351 | 0.8280127 | 1.70136 | pf | 0.9155347 | 4.485631 | pk |
| PFF1070c | PKH_112730 | PVX_114225 | PY01291 | PBANKA_112<br>110 | PCHAS_11206<br>0 | 1.78924 | 0.74838 | 1.09245 | 2.60424 | 1.08137 | 1.87242 | 0.55728 | 0.36638   | 2.60424 | py | 0.4552053 | 1.08137  | pb |
| PFF1080w | PKH_112710 | PVX_114235 | PY02212 | PBANKA_112<br>130 | PCHAS_11208<br>0 | 3.68013 | 3.49248 | 3.53704 | 4.14212 | 3.46078 | 3.02631 | 0.22995 | 0.1460145 | 4.14212 | py | 0.1745943 | 3.460783 | pb |
| PFF1085c | PKH_112700 | PVX_114240 | PY02213 | PBANKA_112<br>140 | PCHAS_11209<br>0 | 2.1916  | 0.73335 | 4.54499 | 2.81311 | 2.26937 | 2.32149 | 0.74755 | 0.4419307 | 4.54499 | pv | 0.4164774 | 2.813114 | py |
| PFF1090c | PKH_112680 | PVX_114250 | PY02214 | PBANKA_112<br>160 | PCHAS_11211<br>0 | 2.25581 | 3.77732 | 3.02011 | 1.15135 | 3.24398 | 0.58085 | 1.0089  | 0.7228291 | 0.58085 | pc | 0.714233  | 3.777321 | pk |

|          |            |            |         |                   |                  |         |         |         |         |         |         |         |           |         |    |           |          |    |
|----------|------------|------------|---------|-------------------|------------------|---------|---------|---------|---------|---------|---------|---------|-----------|---------|----|-----------|----------|----|
| PFF1095w | PKH_112670 | PVX_114255 | PY02181 | PBANKA_112<br>170 | PCHAS_11212<br>0 | 2.41185 | 2.64866 | 2.86708 | 1.54966 | 2.17089 | 1.95499 | 0.37534 | 0.2779726 | 1.54966 | py | 0.2872264 | 2.17089  | pb |
| PFF1100c | PKH_112660 | PVX_114260 | PY02180 | PBANKA_112<br>180 | PCHAS_11213<br>0 | 0.64788 | 5.45322 | 0.0742  | 5.67197 | 5.89928 | 1.99347 | 0.75677 | 0.4326538 | 1.99347 | pc | 0.4293019 | 5.453215 | pk |
| PFF1105c | PKH_112650 | PVX_114265 | PY04071 | PBANKA_112<br>190 | PCHAS_11214<br>0 | 3.46617 | 2.87238 | 4.53324 | 4.55704 | 3.21797 | 6.09182 | 0.9376  | 0.5999867 | 6.09182 | pc | 0.6015354 | 2.872376 | pk |
| PFF1150w | PKH_112560 | PVX_114310 | PY06561 | PBANKA_112<br>280 | PCHAS_11223<br>0 | 3.10957 | 3.55662 | 5.30358 | 4.89531 | 4.76904 | 4.71764 | 0.59735 | 0.3849278 | 3.10957 | pf | 0.1780556 | 3.55662  | pk |
| PFF1155w | PKH_112550 | PVX_114315 | PY02030 | PBANKA_112<br>290 | PCHAS_11224<br>0 | 2.95015 | 2.4317  | 2.66294 | 2.78864 | 1.78431 | 3.70301 | 0.42714 | 0.3045543 | 3.70301 | pc | 0.1610367 | 1.784315 | pb |
| PFF1160w | PKH_112540 | PVX_114320 | PY02031 | PBANKA_112<br>300 | PCHAS_11225<br>0 | 4.21253 | 3.80415 | 3.60044 | 3.46571 | 3.16927 | 3.26715 | 0.28583 | 0.193634  | 4.21253 | pf | 0.1574327 | 3.804146 | pk |
| PFF1165c | PKH_112530 | PVX_114325 | PY02032 | PBANKA_112<br>310 | PCHAS_11226<br>0 | 3.58622 | 3.60031 | 4.2542  | 5.01591 | 4.60281 | 3.71328 | 0.49552 | 0.3340979 | 5.01591 | py | 0.1952394 | 4.602812 | pb |
| PFF1175c | PKH_112510 | PVX_114335 | PY04445 | PBANKA_112<br>330 | PCHAS_11228<br>0 | 3.8471  | 2.89617 | 4.10835 | 2.7743  | 3.41812 | 2.76835 | 0.48912 | 0.344513  | 4.10835 | pv | 0.4001725 | 2.7743   | py |
| PFF1210w | PKH_112460 | PVX_114355 | PY02331 | PBANKA_112<br>390 | PCHAS_11234<br>0 | 5.78587 | 6.25654 | 5.92441 | 0.50661 | 3.04464 | 0.34266 | 0.79611 | 0.341071  | 3.04464 | pb | 0.3340145 | 0.342656 | pc |
| PFF1240w | PKH_112370 | PVX_114385 | PY02044 | PBANKA_112<br>450 | PCHAS_11240<br>0 | 1.27471 | 3.58422 | 0.81415 | 5.6212  | 1.68092 | 5.32662 | 1.22404 | 0.9148351 | 3.58422 | pk | 1.1435438 | 0.814145 | pv |
| PFF1245c | PKH_112360 | PVX_114390 | PY02045 | PBANKA_112<br>460 | PCHAS_11241<br>0 | 3.21913 | 2.39141 | 4.10761 | 4.29372 | 4.23888 | 4.26484 | 0.51322 | 0.2463648 | 2.39141 | pk | 0.2751378 | 4.10761  | pv |
| PFF1270c | PKH_112310 | PVX_114415 | PY04985 | PBANKA_112<br>500 | PCHAS_11245<br>0 | 1.76039 | 2.90386 | 2.46801 | 2.77476 | 2.21089 | 2.40515 | 0.29503 | 0.212515  | 1.76039 | pf | 0.1566825 | 2.903856 | pk |
| PFF1285w | PKH_112280 | PVX_114430 | PY07530 | PBANKA_112<br>530 | PCHAS_11248<br>0 | 1.38171 | 0.6873  | 0.54559 | 0.47072 | 5.54875 | 5.74268 | 0.5698  | 0.5015678 | 1.38171 | pf | 0.5728147 | 0.687304 | pk |
| PFF1290c | PKH_112270 | PVX_114435 | PY07531 | PBANKA_112<br>540 | PCHAS_11249<br>0 | 2.33234 | 2.69178 | 2.99328 | 5.56378 | 3.62173 | 1.45145 | 0.95053 | 0.5662429 | 5.56378 | py | 0.4753168 | 3.621728 | pb |
| PFF1295w | PKH_112260 | PVX_114440 | PY07532 | PBANKA_112<br>550 | PCHAS_11250<br>0 | 2.17728 | 2.64513 | 2.32227 | 5.03175 | 3.77949 | 2.04887 | 0.81799 | 0.439694  | 5.03175 | py | 0.1853107 | 3.779493 | pb |
| PFF1300w | PKH_112250 | PVX_114445 | PY04645 | PBANKA_112<br>560 | PCHAS_11251<br>0 | 2.94776 | 2.39964 | 2.8579  | 2.71888 | 2.64076 | 2.60209 | 0.14701 | 0.112563  | 2.39964 | pk | 0.1059481 | 2.857899 | pv |
| PFF1305w | PKH_112240 | PVX_114450 | PY04644 | PBANKA_112<br>570 | PCHAS_11252<br>0 | 3.51503 | 3.53649 | 3.33906 | 3.20977 | 3.79787 | 2.96882 | 0.22196 | 0.1571048 | 2.96882 | pc | 0.1256706 | 3.797867 | pb |
| PFF1325c | PKH_112200 | PVX_114470 | PY04641 | PBANKA_112<br>600 | PCHAS_11255<br>0 | 4.57679 | 2.955   | 0.50652 | 2.66798 | 4.05698 | 4.68923 | 1.06263 | 0.7286066 | 0.50652 | pv | 0.5635088 | 2.667985 | py |
| PFF1330c | PKH_112190 | PVX_114475 | PY04639 | PBANKA_112<br>610 | PCHAS_11256<br>0 | 2.89558 | 2.02342 | 1.55184 | 4.84716 | 2.89012 | 3.08025 | 0.72627 | 0.4801145 | 4.84716 | py | 0.6001431 | 2.890123 | pb |
| PFF1335c | PKH_112180 | PVX_114480 | PY04638 | PBANKA_112<br>620 | PCHAS_11257<br>0 | 2.52324 | 2.44241 | 2.72482 | 5.70888 | 3.3747  | 2.78586 | 0.69649 | 0.2389799 | 5.70888 | py | 0.1362569 | 3.374697 | pb |
| PFF1345w | PKH_112160 | PVX_114490 | PY02706 | PBANKA_112<br>640 | PCHAS_11259<br>0 | 2.8749  | 1.01709 | 3.59329 | 4.09835 | 0.85747 | 2.08451 | 1.10124 | 0.9187264 | 4.09835 | py | 0.841647  | 0.85747  | pb |
| PFF1350c | PKH_112150 | PVX_114495 | PY02707 | PBANKA_112<br>650 | PCHAS_11260<br>0 | 2.46014 | 0.8419  | 3.0145  | 3.55943 | 2.06631 | 4.19618 | 0.90029 | 0.6458328 | 0.8419  | pk | 0.807291  | 3.014497 | pv |



|            |            |            |         |                   |                  |         |         |         |         |         |         |         |           |         |    |           |          |    |
|------------|------------|------------|---------|-------------------|------------------|---------|---------|---------|---------|---------|---------|---------|-----------|---------|----|-----------|----------|----|
| PFF1375c-a | PKH_112100 | PVX_114515 | PY05544 | PBANKA_112<br>700 | PCHAS_11265<br>0 | 5.85001 | 0.32133 | 3.49296 | 5.25216 | 0.08743 | 6.07531 | 0.74255 | 0.374592  | 3.49296 | pv | 0.2624543 | 5.252163 | py |
| PFF1385c   | PKH_112070 | PVX_114530 | PY06369 | PBANKA_112<br>730 | PCHAS_11268<br>0 | 1.94024 | 2.96199 | 2.3681  | 2.46091 | 3.55583 | 2.86716 | 0.43596 | 0.304163  | 3.55583 | pb | 0.2786415 | 2.867162 | pc |
| PFF1395c   | PKH_112050 | PVX_114540 | PY03547 | PBANKA_112<br>750 | PCHAS_11270<br>0 | 3.42343 | 3.54651 | 2.9454  | 2.45639 | 2.04797 | 2.44811 | 0.49381 | 0.4130869 | 2.04797 | pb | 0.3920342 | 2.448105 | pc |
| PFF1410c   | PKH_112020 | PVX_114555 | PY03546 | PBANKA_112<br>770 | PCHAS_11272<br>0 | 3.3679  | 3.49633 | 2.51207 | 2.58072 | 2.6545  | 1.68364 | 0.45705 | 0.3542869 | 1.68364 | pc | 0.2324001 | 3.496329 | pk |
| PFF1445c   | PKH_111910 | PVX_114590 | PY02229 | PBANKA_112<br>860 | PCHAS_11281<br>0 | 1.70793 | 4.37504 | 4.01531 | 1.25488 | 3.13277 | 3.14117 | 0.90599 | 0.7099292 | 1.25488 | py | 0.885312  | 3.132772 | pb |
| PFF1460c   | PKH_111880 | PVX_114605 | PY06261 | PBANKA_112<br>890 | PCHAS_11284<br>0 | 0.37049 | 0.03082 | 0.44686 | 5.42695 | 0.38955 | 5.61072 | 0.4508  | 0.2956114 | 5.42695 | py | 0.3647497 | 0.389548 | pb |
| PFF1470c   | PKH_111860 | PVX_114615 | PY06086 | PBANKA_112<br>910 | PCHAS_11286<br>0 | 3.99067 | 4.39012 | 5.11129 | 5.73985 | 4.05078 | 4.38371 | 0.46935 | 0.2919917 | 5.73985 | py | 0.281757  | 4.050783 | pb |
| PFF1485w   | PKH_111830 | PVX_114630 | PY04518 | PBANKA_112<br>940 | PCHAS_11289<br>0 | 4.18428 | 0.14813 | 4.22829 | 4.61481 | 3.65322 | 3.15061 | 0.71438 | 0.4078531 | 0.14813 | pk | 0.4988141 | 4.228285 | pv |
| PFF1490w   | PKH_111820 | PVX_114635 | PY04519 | PBANKA_112<br>950 | PCHAS_11290<br>0 | 0.17937 | 3.39386 | 0.6304  | 1.52494 | 2.84022 | 2.22739 | 1.02113 | 0.815748  | 0.17937 | pf | 0.7280655 | 3.393864 | pk |
| PFF1500c   | PKH_111800 | PVX_114645 | PY00830 | PBANKA_112<br>970 | PCHAS_11292<br>0 | 1.54944 | 0.54049 | 1.87787 | 0.48144 | 0.16994 | 1.49557 | 0.62183 | 0.4787269 | 1.87787 | pv | 0.5836448 | 0.481438 | py |
| PFI0145w   | PKH_070020 | PVX_098595 | PY01822 | PBANKA_041<br>840 | PCHAS_04193<br>0 | 3.90104 | 3.44394 | 2.84446 | 5.54197 | 2.85754 | 0.99934 | 1.03093 | 0.7002351 | 5.54197 | py | 0.8752939 | 2.857544 | pb |
| PFI0150c   | PKH_070030 | PVX_098600 | PY01823 | PBANKA_041<br>830 | PCHAS_04192<br>0 | 1.99725 | 2.86882 | 0.05464 | 0.68613 | 3.15608 | 4.8718  | 1.35978 | 1.056826  | 4.8718  | pc | 0.8353793 | 0.054641 | pv |
| PFI0155c   | PKH_070040 | PVX_098605 | PY01824 | PBANKA_041<br>820 | PCHAS_04191<br>0 | 3.80576 | 4.8129  | 5.15649 | 4.56174 | 4.08486 | 4.64141 | 0.35974 | 0.2645578 | 3.80576 | pf | 0.2878244 | 4.8129   | pk |
| PFI0170w   | PKH_070070 | PVX_098620 | PY01157 | PBANKA_041<br>790 | PCHAS_04188<br>0 | 1.37905 | 2.08238 | 3.7695  | 0.44929 | 2.49193 | 1.29115 | 0.87072 | 0.5667723 | 3.7695  | pv | 0.4760277 | 0.449295 | py |
| PFI0180w   | PKH_070090 | PVX_098630 | PY01155 | PBANKA_041<br>770 | PCHAS_04186<br>0 | 4.25117 | 4.9332  | 5.20481 | 5.56566 | 5.09711 | 4.52194 | 0.36021 | 0.2630655 | 4.25117 | pf | 0.2878543 | 4.9332   | pk |
| PFI0190w   | PKH_070110 | PVX_098640 | PY01152 | PBANKA_041<br>750 | PCHAS_04184<br>0 | 2.18698 | 2.04869 | 2.48031 | 2.17593 | 2.87037 | 1.88761 | 0.23757 | 0.1461978 | 2.87037 | pb | 0.1106673 | 1.887615 | pc |
| PFI0195c   | PKH_070120 | PVX_098645 | PY01151 | PBANKA_041<br>740 | PCHAS_04183<br>0 | 2.48158 | 3.69199 | 2.70041 | 2.10951 | 4.3772  | 2.55886 | 0.60327 | 0.3602601 | 4.3772  | pb | 0.4503251 | 2.558857 | pc |
| PFI0200c   | PKH_070130 | PVX_098650 | PY01150 | PBANKA_041<br>730 | PCHAS_04182<br>0 | 3.12552 | 3.41301 | 3.47817 | 4.20757 | 2.33698 | 2.30099 | 0.55587 | 0.4506395 | 4.20757 | py | 0.3661654 | 2.336983 | pb |
| PFI0205w   | PKH_070140 | PVX_098655 | PY01149 | PBANKA_041<br>720 | PCHAS_04181<br>0 | 0.81616 | 0.88675 | 0.57113 | 0.06737 | 0.16736 | 4.58693 | 0.62259 | 0.2936352 | 4.58693 | pc | 0.2881383 | 0.886751 | pk |
| PFI0210c   | PKH_070150 | PVX_098660 | PY01148 | PBANKA_041<br>710 | PCHAS_04180<br>0 | 4.99879 | 4.98954 | 5.48138 | 1.42044 | 6.10098 | 4.59241 | 0.78421 | 0.4000827 | 1.42044 | py | 0.2245545 | 6.100981 | pb |
| PFI0215c   | PKH_070160 | PVX_098665 | PY04820 | PBANKA_041<br>700 | PCHAS_04179<br>0 | 4.28112 | 3.70638 | 3.32952 | 2.45333 | 2.96438 | 0.67801 | 0.87022 | 0.5139583 | 0.67801 | pc | 0.4045467 | 4.281122 | pf |
| PFI0220w   | PKH_070170 | PVX_098670 | PY06424 | PBANKA_041<br>690 | PCHAS_04178<br>0 | 2.96341 | 3.74023 | 3.9051  | 2.81213 | 3.04813 | 3.60877 | 0.40507 | 0.3146917 | 3.9051  | pv | 0.3343643 | 2.812132 | py |

|            |            |            |         |               |              |         |         |         |         |         |         |         |           |         |    |           |          |    |
|------------|------------|------------|---------|---------------|--------------|---------|---------|---------|---------|---------|---------|---------|-----------|---------|----|-----------|----------|----|
| PFI0225w   | PKH_070180 | PVX_098675 | PY04608 | PBANKA_041680 | PCHAS_041770 | 5.96774 | 0.88132 | 5.24235 | 2.47579 | 4.07847 | 2.37914 | 1.47527 | 1.1976769 | 5.24235 | pv | 1.4451532 | 2.475788 | py |
| PFI0235w   | PKH_070200 | PVX_098685 | PY00067 | PBANKA_041660 | PCHAS_041750 | 3.91702 | 5.06192 | 5.47371 | 4.104   | 4.28235 | 4.45176 | 0.44733 | 0.29853   | 5.47371 | pv | 0.3285749 | 4.104004 | py |
| PFI0245c   | PKH_070220 | PVX_098695 | PY00065 | PBANKA_041640 | PCHAS_041730 | 3.92219 | 2.26041 | 3.67177 | 4.00114 | 3.77921 | 3.2217  | 0.42478 | 0.2059736 | 2.26041 | pk | 0.2306081 | 3.671772 | pv |
| PFI0250c   | PKH_070230 | PVX_098700 | PY00064 | PBANKA_041630 | PCHAS_041720 | 5.46827 | 0.18891 | 4.37993 | 5.3549  | 4.73321 | 0.60183 | 0.72622 | 0.5654452 | 0.60183 | pc | 0.4630646 | 4.379934 | pv |
| PFI0255c   | PKH_070240 | PVX_098705 | PY04545 | PBANKA_041620 | PCHAS_041710 | 1.50927 | 1.01416 | 5.95734 | 1.65168 | 0.81651 | 1.48815 | 0.52405 | 0.2660583 | 5.95734 | pv | 0.2916907 | 1.651679 | py |
| PFI0260c   | PKH_070250 | PVX_098710 | PY04544 | PBANKA_041610 | PCHAS_041700 | 0.52267 | 3.62878 | 6.18621 | 0.85895 | 5.82893 | 0.62874 | 0.8575  | 0.4077837 | 3.62878 | pk | 0.3548172 | 6.18621  | pv |
| PFI0280c-a | PKH_070290 | PVX_098725 | PY04567 | PBANKA_041570 | PCHAS_041660 | 3.32132 | 5.04367 | 5.6173  | 5.37951 | 5.00746 | 5.00883 | 0.45048 | 0.1961042 | 3.32132 | pf | 0.2451303 | 5.043673 | pk |
| PFI0285w   | PKH_070300 | PVX_098730 | PY03790 | PBANKA_041560 | PCHAS_041650 | 1.95163 | 2.32213 | 1.2321  | 1.47749 | 0.73626 | 2.29577 | 0.52061 | 0.3816622 | 0.73626 | pb | 0.3910409 | 2.295773 | pc |
| PFI0295c   | PKH_070330 | PVX_098745 | PY04959 | PBANKA_041530 | PCHAS_041620 | 2.90976 | 1.956   | 2.44462 | 1.12253 | 3.30894 | 1.4129  | 0.69531 | 0.5637904 | 3.30894 | pb | 0.5689625 | 1.412902 | pc |
| PFI0300w   | PKH_070340 | PVX_098750 | PY07558 | PBANKA_041520 | PCHAS_041610 | 4.05586 | 4.82055 | 4.62783 | 5.91655 | 4.49719 | 4.85006 | 0.40105 | 0.2235117 | 5.91655 | py | 0.2467303 | 4.497191 | pb |
| PFI0315c   | PKH_070370 | PVX_098765 | PY05018 | PBANKA_041490 | PCHAS_041580 | 1.06353 | 0.03426 | 6.19747 | 0.46417 | 0.7121  | 0.98066 | 0.3906  | 0.3091536 | 6.19747 | pv | 0.3244595 | 0.464168 | py |
| PFI0335w   | PKH_070410 | PVX_098785 | PY05144 | PBANKA_080840 | PCHAS_080870 | 2.2731  | 2.11147 | 2.65869 | 1.82111 | 3.8     | 0.79864 | 0.66676 | 0.4624079 | 3.8     | pb | 0.2498028 | 0.798637 | pc |
| PFI0345w   | PKH_070440 | PVX_098805 | PY01953 | PBANKA_080870 | PCHAS_080900 | 5.21784 | 0.75025 | 1.26691 | 0.983   | 1.35891 | 2.29517 | 0.70885 | 0.3841648 | 5.21784 | pf | 0.3510419 | 0.750255 | pk |
| PFI0350c   | PKH_070450 | PVX_098810 | PY01952 | PBANKA_080880 | PCHAS_080910 | 2.33365 | 3.3259  | 2.91564 | 5.97198 | 3.41618 | 2.04838 | 0.90273 | 0.4720095 | 5.97198 | py | 0.4648753 | 3.416184 | pb |
| PFI0355c   | PKH_070460 | PVX_098815 | PY01951 | PBANKA_080890 | PCHAS_080920 | 4.20314 | 5.02117 | 4.22093 | 2.96552 | 3.15567 | 3.18455 | 0.68991 | 0.4605731 | 5.02117 | pk | 0.3166221 | 4.220927 | pv |
| PFI0365w   | PKH_070480 | PVX_098825 | PY04116 | PBANKA_080900 | PCHAS_080930 | 1.15524 | 2.53798 | 2.19899 | 0.57755 | 2.01985 | 3.44711 | 0.73857 | 0.6008371 | 3.44711 | pc | 0.3904713 | 0.577549 | py |
| PFI0370c   | PKH_070490 | PVX_098830 | PY04117 | PBANKA_080910 | PCHAS_080940 | 2.17736 | 2.21735 | 2.41011 | 0.43723 | 3.09481 | 4.89862 | 0.9286  | 0.578068  | 4.89862 | pc | 0.2775557 | 0.437232 | py |
| PFI0375w   | PKH_070500 | PVX_098835 | PY01737 | PBANKA_080920 | PCHAS_080950 | 4.78973 | 4.27758 | 3.61413 | 3.46457 | 3.64633 | 5.66555 | 0.66797 | 0.3977188 | 5.66555 | pc | 0.2112998 | 4.789725 | pf |
| PFI0380c   | PKH_070510 | PVX_098840 | PY01738 | PBANKA_080930 | PCHAS_080960 | 3.28413 | 3.3034  | 2.68483 | 2.53981 | 4.04383 | 4.22467 | 0.51052 | 0.4245162 | 4.22467 | pc | 0.3445649 | 2.539807 | py |
| PFI0385c   | PKH_070520 | PVX_098845 | PY01739 | PBANKA_080940 | PCHAS_080970 | 4.97045 | 5.95998 | 5.07892 | 0.15356 | 5.23549 | 5.24178 | 0.39228 | 0.2304792 | 0.15356 | py | 0.288099  | 5.235487 | pb |
| PFI0395w   | PKH_070560 | PVX_098850 | PY06648 | PBANKA_080960 | PCHAS_080990 | 5.02109 | 5.23174 | 5.12075 | 5.2195  | 5.11126 | 5.21411 | 0.06871 | 0.0438452 | 5.02109 | pf | 0.0503989 | 5.231739 | pk |
| PFI0415c   | PKH_070600 | PVX_098870 | PY05388 | PBANKA_080980 | PCHAS_081010 | 1.78414 | 2.00936 | 2.3272  | 6.21136 | 3.72091 | 1.69009 | 0.77585 | 0.5147768 | 6.21136 | py | 0.2155846 | 3.720906 | pb |



|          |            |            |         |               |              |         |         |         |         |         |         |         |           |         |    |           |          |    |
|----------|------------|------------|---------|---------------|--------------|---------|---------|---------|---------|---------|---------|---------|-----------|---------|----|-----------|----------|----|
| PFI0440w | PKH_070650 | PVX_098895 | PY03134 | PBANKA_081030 | PCHAS_081060 | 5.73119 | 5.74376 | 0.72409 | 5.96481 | 4.25221 | 2.1875  | 0.9526  | 0.5977365 | 2.1875  | pc | 0.3742832 | 4.252206 | pb |
| PFI0455w | PKH_070680 | PVX_098910 | PY03131 | PBANKA_081060 | PCHAS_081090 | 1.96452 | 1.24768 | 2.64036 | 1.93328 | 0.05047 | 2.74978 | 0.6872  | 0.4418351 | 0.05047 | pb | 0.355979  | 2.749775 | pc |
| PFI0460w | PKH_070690 | PVX_098915 | PY03130 | PBANKA_081070 | PCHAS_081110 | 5.55698 | 5.8862  | 0.77114 | 0.49127 | 0.38336 | 3.40716 | 0.90157 | 0.4771205 | 3.40716 | pc | 0.3190071 | 5.556975 | pf |
| PFI0465c | PKH_070700 | PVX_098920 | PY03129 | PBANKA_081080 | PCHAS_081110 | 4.84069 | 6.10521 | 4.69841 | 6.19886 | 5.22239 | 5.05163 | 0.48929 | 0.3576981 | 6.19886 | py | 0.4044333 | 5.222386 | pb |
| PFI0470w | PKH_070710 | PVX_098925 | PY03501 | PBANKA_081090 | PCHAS_081120 | 0.45355 | 0.31567 | 5.797   | 1.23259 | 1.26202 | 0.06641 | 0.50871 | 0.4225051 | 5.797   | pv | 0.3333717 | 1.232586 | py |
| PFI0475w | PKH_070720 | PVX_098930 | PY03502 | PBANKA_081100 | PCHAS_081130 | 2.08172 | 3.1308  | 2.75796 | 6.26321 | 3.27934 | 4.6199  | 1.032   | 0.6119118 | 6.26321 | py | 0.7277539 | 3.279342 | pb |
| PFI0480w | PKH_070730 | PVX_098935 | PY03503 | PBANKA_081110 | PCHAS_081140 | 1.76114 | 1.41111 | 2.05364 | 2.12194 | 1.65705 | 1.96322 | 0.21825 | 0.1514774 | 1.41111 | pk | 0.1667426 | 2.053638 | pv |
| PFI0495w | PKH_070760 | PVX_098950 | PY04264 | PBANKA_081140 | PCHAS_081170 | 3.99882 | 1.93162 | 5.40406 | 0.5405  | 0.50204 | 1.04869 | 1.03038 | 0.6714787 | 3.99882 | pf | 0.4915686 | 1.931618 | pk |
| PFI0500w | PKH_070770 | PVX_098955 | PY05529 | PBANKA_081150 | PCHAS_081180 | 2.28854 | 0.58917 | 2.31347 | 3.00897 | 2.71974 | 1.40598 | 0.62641 | 0.4068376 | 0.58917 | pk | 0.5085469 | 2.31347  | pv |
| PFI0505c | PKH_070780 | PVX_098960 | PY05530 | PBANKA_081160 | PCHAS_081190 | 3.36947 | 0.78559 | 3.31482 | 4.16666 | 1.1138  | 2.28399 | 1.11126 | 0.827668  | 0.78559 | pk | 1.034585  | 3.314824 | pv |
| PFI0525w | PKH_070820 | PVX_098980 | PY00852 | PBANKA_081190 | PCHAS_081220 | 2.96368 | 1.47624 | 4.30898 | 2.35014 | 1.48016 | 0.01509 | 1.10855 | 0.7645004 | 4.30898 | pv | 0.7381305 | 2.350145 | py |
| PFI0540w | PKH_070850 | PVX_098995 | PY00335 | PBANKA_081220 | PCHAS_081250 | 6.19134 | 6.18083 | 5.72388 | 5.58999 | 6.13131 | 6.01701 | 0.19543 | 0.1262564 | 5.58999 | py | 0.1578205 | 6.131314 | pb |
| PFI0545w | PKH_070860 | PVX_099000 | PY00336 | PBANKA_081230 | PCHAS_081260 | 4.37807 | 4.08208 | 5.21577 | 3.7999  | 4.78596 | 4.83167 | 0.42889 | 0.3174578 | 3.7999  | py | 0.3968223 | 4.785964 | pb |
| PFI0555c | PKH_070880 | PVX_099010 | PY00338 | PBANKA_081250 | PCHAS_081280 | 2.37445 | 3.27016 | 2.48655 | 3.98834 | 2.80965 | 2.19558 | 0.50193 | 0.3019562 | 3.98834 | py | 0.2966711 | 2.809649 | pb |
| PFI0565w | PKH_070900 | PVX_099020 | PY03427 | PBANKA_081270 | PCHAS_081300 | 4.55631 | 5.43038 | 3.91942 | 5.00763 | 4.27224 | 4.80793 | 0.41633 | 0.3247792 | 5.43038 | pk | 0.2467512 | 3.91942  | pv |
| PFI0570w | PKH_070910 | PVX_099025 | PY03426 | PBANKA_081280 | PCHAS_081310 | 3.49762 | 3.69681 | 3.42009 | 2.68369 | 3.08023 | 2.38896 | 0.41027 | 0.2861014 | 2.38896 | pc | 0.2884462 | 3.696808 | pk |
| PFI0575c | PKH_070920 | PVX_099030 | PY03425 | PBANKA_081290 | PCHAS_081320 | 5.2904  | 2.86761 | 2.34965 | 4.89689 | 3.68368 | 1.48005 | 1.19561 | 0.9501745 | 5.2904  | pf | 1.1877181 | 2.867607 | pk |
| PFI0590c | PKH_070950 | PVX_099045 | PY03423 | PBANKA_081320 | PCHAS_081350 | 3.86214 | 3.18257 | 3.97627 | 1.21685 | 2.19628 | 2.22224 | 0.8976  | 0.6839784 | 1.21685 | py | 0.6084005 | 2.196278 | pb |
| PFI0605c | PKH_070970 | PVX_099055 | PY03421 | PBANKA_081340 | PCHAS_081370 | 3.9293  | 5.02855 | 3.09581 | 3.89114 | 3.49382 | 5.30812 | 0.63087 | 0.4736429 | 5.30812 | pc | 0.393222  | 3.095815 | pv |
| PFI0610w | PKH_070980 | PVX_099060 | PY07463 | PBANKA_081350 | PCHAS_081380 | 2.27783 | 1.31601 | 0.25908 | 2.24257 | 3.53555 | 1.60671 | 0.81236 | 0.589061  | 3.53555 | pb | 0.7363262 | 1.606713 | pc |
| PFI0625c | PKH_071010 | PVX_099075 | PY03441 | PBANKA_081380 | PCHAS_081410 | 1.83305 | 3.82182 | 2.64422 | 2.17371 | 2.53366 | 1.52865 | 0.57738 | 0.3632366 | 3.82182 | pk | 0.3364164 | 2.644225 | pv |
| PFI0640c | PKH_071040 | PVX_099090 | PY05053 | PBANKA_081410 | PCHAS_081440 | 3.27451 | 4.02795 | 3.72774 | 0.26087 | 2.60153 | 1.3596  | 1.1347  | 0.7589133 | 0.26087 | py | 0.7803965 | 2.601528 | pb |

|          |            |            |         |                   |                  |         |         |         |         |         |         |         |           |         |    |           |          |    |
|----------|------------|------------|---------|-------------------|------------------|---------|---------|---------|---------|---------|---------|---------|-----------|---------|----|-----------|----------|----|
| PFI0645w | PKH_071050 | PVX_099095 | PY06160 | PBANKA_081<br>420 | PCHAS_08145<br>0 | 2.68612 | 2.22974 | 3.66115 | 2.84703 | 3.37059 | 2.97843 | 0.37455 | 0.2997175 | 2.22974 | pk | 0.2039672 | 3.661145 | pv |
| PFI0650c | PKH_071060 | PVX_099100 | PY04842 | PBANKA_081<br>430 | PCHAS_08146<br>0 | 2.29018 | 5.45334 | 2.23084 | 1.70569 | 3.16414 | 1.62811 | 0.86354 | 0.4241069 | 5.45334 | pk | 0.5301336 | 2.230839 | pv |
| PFI0665w | PKH_071090 | PVX_099110 | PY02478 | PBANKA_081<br>460 | PCHAS_08149<br>0 | 4.40685 | 0.82746 | 3.40373 | 5.63452 | 3.12208 | 2.1543  | 1.22354 | 0.9529971 | 0.82746 | pk | 1.1912464 | 3.403727 | pv |
| PFI0670w | PKH_071100 | PVX_099115 | PY02480 | PBANKA_081<br>470 | PCHAS_08150<br>0 | 3.70178 | 2.75388 | 2.87091 | 1.81132 | 3.22212 | 2.4635  | 0.46102 | 0.3413049 | 1.81132 | py | 0.3388281 | 3.222123 | pb |
| PFI0680c | PKH_071110 | PVX_099120 | PY02481 | PBANKA_081<br>490 | PCHAS_08152<br>0 | 2.09459 | 2.90315 | 1.35286 | 4.80523 | 2.89945 | 2.26011 | 0.81671 | 0.4710293 | 4.80523 | py | 0.4289524 | 2.899452 | pb |
| PFI0690c | PKH_071130 | PVX_099130 | PY02485 | PBANKA_081<br>510 | PCHAS_08154<br>0 | 5.91059 | 0.01068 | 6.10573 | 6.05285 | 5.68606 | 6.27881 | 0.17148 | 0.1218458 | 5.68606 | pb | 0.1090367 | 6.278809 | pc |
| PFI0695c | PKH_071140 | PVX_099135 | PY02486 | PBANKA_081<br>520 | PCHAS_08155<br>0 | 0.68212 | 3.37946 | 1.69327 | 1.59594 | 3.46296 | 5.89966 | 1.10686 | 0.9128716 | 5.89966 | pc | 0.6986658 | 3.462961 | pb |
| PFI0700c | PKH_071150 | PVX_099140 | PY04160 | PBANKA_081<br>530 | PCHAS_08156<br>0 | 1.05905 | 0.85856 | 1.77893 | 2.30071 | 1.72373 | 1.64264 | 0.37385 | 0.3170095 | 2.30071 | py | 0.3759903 | 1.72373  | pb |
| PFI0720w | PKH_071190 | PVX_099160 | PY02653 | PBANKA_081<br>570 | PCHAS_08160<br>0 | 1.96551 | 2.02707 | 2.69691 | 0.28269 | 0.33615 | 2.41829 | 0.75965 | 0.5627067 | 0.28269 | py | 0.2806534 | 0.336149 | pb |
| PFI0725c | PKH_071210 | PVX_099165 | PY02654 | PBANKA_081<br>580 | PCHAS_08161<br>0 | 4.72901 | 2.89401 | 5.60486 | 5.7571  | 5.31732 | 5.10353 | 0.65879 | 0.3058833 | 2.89401 | pk | 0.3104683 | 5.60486  | pv |
| PFI0730w | PKH_071220 | PVX_099175 | PY03420 | PBANKA_081<br>590 | PCHAS_08162<br>0 | 3.0678  | 0.09101 | 5.10967 | 2.54033 | 4.92705 | 1.898   | 1.4292  | 1.1196775 | 0.09101 | pk | 0.8891306 | 5.109665 | pv |
| PFI0735c | PKH_071230 | PVX_099180 | PY03419 | PBANKA_081<br>600 | PCHAS_08163<br>0 | 5.27788 | 3.61262 | 5.15306 | 4.62568 | 3.78589 | 5.37459 | 0.63022 | 0.4481816 | 3.61262 | pk | 0.560227  | 5.153057 | pv |
| PFI0750c | PKH_071260 | PVX_099195 | PY01320 | PBANKA_081<br>630 | PCHAS_08166<br>0 | 2.74185 | 3.6378  | 2.5665  | 3.19341 | 3.80491 | 2.1299  | 0.53298 | 0.4268715 | 2.1299  | pc | 0.3807132 | 3.80491  | pb |
| PFI0755c | PKH_071270 | PVX_099200 | PY01321 | PBANKA_081<br>640 | PCHAS_08167<br>0 | 2.43515 | 2.47497 | 2.50847 | 2.18565 | 1.61675 | 2.20278 | 0.23557 | 0.1190022 | 1.61675 | pb | 0.0906604 | 2.202777 | pc |
| PFI0760w | PKH_071280 | PVX_099205 | PY01322 | PBANKA_081<br>650 | PCHAS_08168<br>0 | 2.72504 | 3.01862 | 1.5415  | 5.8038  | 2.63983 | 2.01523 | 0.88436 | 0.4373876 | 5.8038  | py | 0.5467345 | 2.639831 | pb |
| PFI0770c | PKH_071300 | PVX_099215 | PY07489 | PBANKA_081<br>670 | PCHAS_08170<br>0 | 5.25405 | 4.10555 | 2.80359 | 3.58484 | 4.94309 | 4.2981  | 0.66688 | 0.50135   | 2.80359 | pv | 0.4483721 | 3.584841 | py |
| PFI0775w | PKH_071310 | PVX_099220 | PY07488 | PBANKA_081<br>680 | PCHAS_08171<br>0 | 6.03128 | 3.59317 | 0.41578 | 0.39029 | 5.19165 | 5.56878 | 0.84169 | 0.5224031 | 3.59317 | pk | 0.4860839 | 0.415777 | pv |
| PFI0780w | PKH_071320 | PVX_099225 | PY00953 | PBANKA_081<br>690 | PCHAS_08172<br>0 | 2.66845 | 4.68622 | 2.12047 | 2.91393 | 3.61434 | 4.83987 | 0.90626 | 0.7023281 | 4.83987 | pc | 0.6795465 | 2.120472 | pv |
| PFI0790w | PKH_071340 | PVX_099235 | PY00221 | PBANKA_081<br>710 | PCHAS_08174<br>0 | 5.77388 | 3.25538 | 3.05184 | 5.07236 | 4.27448 | 5.8074  | 1.01199 | 0.8102844 | 3.05184 | pv | 1.0128554 | 5.072357 | py |
| PFI0795w | PKH_071350 | PVX_099240 | PY00222 | PBANKA_081<br>720 | PCHAS_08175<br>0 | 3.18129 | 2.42608 | 2.36206 | 1.69956 | 2.41532 | 1.89036 | 0.34512 | 0.2502959 | 3.18129 | pf | 0.2968657 | 2.426077 | pk |
| PFI0815c | PKH_071390 | PVX_099255 | PY06964 | PBANKA_081<br>760 | PCHAS_08179<br>0 | 1.68779 | 3.30655 | 1.34745 | 6.27621 | 2.26525 | 1.32919 | 0.76499 | 0.5790312 | 6.27621 | py | 0.5794235 | 2.265251 | pb |
| PFI0830c | PKH_071430 | PVX_099270 | PY03265 | PBANKA_081<br>800 | PCHAS_08183<br>0 | 4.18017 | 4.71105 | 4.47635 | 4.53191 | 4.97127 | 4.79184 | 0.21429 | 0.1509696 | 4.18017 | pf | 0.188712  | 4.711052 | pk |

|            |            |            |         |               |              |         |         |         |         |         |         |         |           |         |    |           |          |    |
|------------|------------|------------|---------|---------------|--------------|---------|---------|---------|---------|---------|---------|---------|-----------|---------|----|-----------|----------|----|
| PFI0835c   | PKH_071440 | PVX_099275 | PY07176 | PBANKA_081810 | PCHAS_081840 | 2.81414 | 2.26147 | 2.58658 | 5.61463 | 3.44417 | 3.02771 | 0.73739 | 0.3247659 | 5.61463 | py | 0.24845   | 3.444173 | pb |
| PFI0845w   | PKH_071460 | PVX_099285 | PY07178 | PBANKA_081830 | PCHAS_081860 | 5.47225 | 5.00187 | 5.24899 | 4.54134 | 5.17871 | 5.65309 | 0.2754  | 0.1889532 | 4.54134 | py | 0.2186217 | 5.178713 | pb |
| PFI0855w   | PKH_071480 | PVX_099295 | PY06081 | PBANKA_081850 | PCHAS_081880 | 3.95887 | 4.60355 | 4.72819 | 5.80536 | 6.27472 | 4.62343 | 0.60374 | 0.3942269 | 6.27472 | pb | 0.4927836 | 4.623425 | pc |
| PFI0860c   | PKH_071490 | PVX_099300 | PY06080 | PBANKA_081860 | PCHAS_081890 | 1.91721 | 2.51478 | 2.57049 | 5.94809 | 1.86047 | 0.71531 | 0.79363 | 0.5018997 | 5.94809 | py | 0.613191  | 1.860471 | pb |
| PFI0865w   | PKH_071500 | PVX_099305 | PY06079 | PBANKA_081870 | PCHAS_081900 | 1.75615 | 3.47926 | 2.17695 | 0.21821 | 1.37655 | 1.0496  | 0.79467 | 0.5330578 | 3.47926 | pk | 0.4662218 | 2.176948 | pv |
| PFI0875w   | PKH_071520 | PVX_099315 | PY05001 | PBANKA_081890 | PCHAS_081920 | 3.83295 | 4.51098 | 3.97528 | 2.93355 | 3.17013 | 4.00694 | 0.42609 | 0.302967  | 2.93355 | py | 0.1774218 | 3.170133 | pb |
| PFI0880c   | PKH_071530 | PVX_099320 | PY05000 | PBANKA_081900 | PCHAS_081930 | 4.97398 | 5.48802 | 5.63609 | 5.90601 | 5.85191 | 5.36433 | 0.26128 | 0.1811119 | 4.97398 | pf | 0.189374  | 5.488025 | pk |
| PFI0890c-a | PKH_071550 | PVX_099330 | PY07001 | PBANKA_081920 | PCHAS_081950 | 4.07728 | 3.63768 | 4.02632 | 3.951   | 3.48624 | 4.04491 | 0.17893 | 0.1067024 | 3.48624 | pb | 0.1287295 | 4.044913 | pc |
| PFI0920c   | PKH_071600 | PVX_099355 | PY06801 | PBANKA_081970 | PCHAS_082000 | 1.68533 | 0.84007 | 3.82628 | 3.26912 | 2.06293 | 1.14652 | 0.9144  | 0.669093  | 3.82628 | pv | 0.4404177 | 3.269123 | py |
| PFI0925w   | PKH_071610 | PVX_099360 | PY01606 | PBANKA_081980 | PCHAS_082010 | 2.1451  | 1.14256 | 2.09373 | 2.55801 | 1.33633 | 1.27172 | 0.5077  | 0.364909  | 2.55801 | py | 0.4561363 | 1.33633  | pb |
| PFI0930c   | PKH_071620 | PVX_099365 | PY01605 | PBANKA_081990 | PCHAS_082020 | 2.75427 | 2.35906 | 3.13792 | 2.75616 | 0.94927 | 2.81632 | 0.4413  | 0.168181  | 0.94927 | pb | 0.1951869 | 2.816316 | pc |
| PFI0935w   | PKH_071630 | PVX_099370 | PY05339 | PBANKA_082000 | PCHAS_082030 | 3.27203 | 4.55068 | 4.18435 | 0.96075 | 3.80645 | 4.19808 | 0.78831 | 0.3340558 | 0.96075 | py | 0.3230947 | 3.806452 | pb |
| PFI0940c   | PKH_071640 | PVX_099375 | PY05337 | PBANKA_082010 | PCHAS_082040 | 6.07187 | 6.05129 | 5.75947 | 5.63509 | 5.57213 | 5.95828 | 0.18579 | 0.14572   | 5.57213 | pb | 0.18215   | 5.958278 | pc |
| PFI0950w   | PKH_071660 | PVX_099385 | PY05335 | PBANKA_082030 | PCHAS_082060 | 4.84145 | 5.0837  | 3.1495  | 4.12591 | 4.64839 | 3.62207 | 0.61268 | 0.4354345 | 3.1495  | pv | 0.4136737 | 4.125907 | py |
| PFI0970c   | PKH_071700 | PVX_099405 | PY05378 | PBANKA_082070 | PCHAS_082100 | 5.25174 | 5.53379 | 4.9635  | 5.16064 | 6.21537 | 4.74963 | 0.35452 | 0.2144793 | 6.21537 | pb | 0.1653485 | 4.749634 | pc |
| PFI0975c   | PKH_071710 | PVX_099410 | PY05377 | PBANKA_082080 | PCHAS_082110 | 5.08437 | 5.50427 | 5.21848 | 4.90139 | 5.17504 | 5.30926 | 0.1452  | 0.1083975 | 5.50427 | pk | 0.1246352 | 5.218483 | pv |
| PFI0990c   | PKH_071740 | PVX_099425 | PY05249 | PBANKA_082110 | PCHAS_082140 | 4.04062 | 3.46444 | 3.22026 | 2.75229 | 3.86048 | 2.6147  | 0.46305 | 0.3915854 | 4.04062 | pf | 0.4284381 | 3.464439 | pk |
| PFI1010w   | PKH_071780 | PVX_099445 | PY02621 | PBANKA_082150 | PCHAS_082180 | 5.31203 | 3.71171 | 2.89844 | 3.00267 | 3.6233  | 1.9518  | 0.79902 | 0.4969526 | 5.31203 | pf | 0.4439314 | 3.711708 | pk |
| PFI1015w   | PKH_071790 | PVX_099450 | PY03600 | PBANKA_082160 | PCHAS_082190 | 5.84858 | 5.81789 | 5.51686 | 5.78135 | 4.14036 | 5.87349 | 0.35023 | 0.0847731 | 4.14036 | pb | 0.0920651 | 5.873493 | pc |
| PFI1020c   | PKH_071800 | PVX_099455 | PY03601 | PBANKA_082170 | PCHAS_082200 | 1.72447 | 2.36204 | 5.18389 | 3.06948 | 2.48385 | 2.2921  | 0.72644 | 0.3073528 | 5.18389 | pv | 0.2073302 | 3.069483 | py |
| PFI1025w   | PKH_071810 | PVX_099460 | PY03602 | PBANKA_082180 | PCHAS_082210 | 2.44836 | 2.93344 | 2.40462 | 2.39618 | 3.00442 | 2.3942  | 0.19854 | 0.118283  | 3.00442 | pb | 0.1452496 | 2.394202 | pc |
| PFI1040c   | PKH_071840 | PVX_099480 | PY03606 | PBANKA_082210 | PCHAS_082240 | 1.76977 | 1.24582 | 2.05908 | 6.22096 | 0.33575 | 1.32934 | 0.60648 | 0.4494569 | 6.22096 | py | 0.3134219 | 0.335748 | pb |

|          |            |            |         |                   |                  |         |         |         |         |         |         |         |           |         |    |           |          |    |
|----------|------------|------------|---------|-------------------|------------------|---------|---------|---------|---------|---------|---------|---------|-----------|---------|----|-----------|----------|----|
| PFI1045w | PKH_071850 | PVX_099485 | PY02488 | PBANKA_082<br>220 | PCHAS_08225<br>0 | 2.34118 | 4.29191 | 3.36777 | 5.58652 | 1.88998 | 3.61446 | 0.98233 | 0.7350429 | 5.58652 | py | 0.5493546 | 1.889975 | pb |
| PFI1060w | PKH_071880 | PVX_099500 | PY04670 | PBANKA_082<br>250 | PCHAS_08228<br>0 | 2.04639 | 1.79703 | 2.81885 | 2.58546 | 2.37509 | 0.60966 | 0.55438 | 0.3121759 | 0.60966 | pc | 0.2792806 | 2.818846 | pv |
| PFI1065c | PKH_071890 | PVX_099505 | PY04671 | PBANKA_082<br>260 | PCHAS_08229<br>0 | 3.75139 | 3.86369 | 2.78993 | 1.89546 | 2.40485 | 3.54215 | 0.67783 | 0.4840594 | 1.89546 | py | 0.3207493 | 2.404854 | pb |
| PFI1080w | PKH_071920 | PVX_099515 | PY00184 | PBANKA_082<br>290 | PCHAS_08232<br>0 | 3.83971 | 2.17828 | 5.93074 | 2.20868 | 0.5219  | 1.73113 | 1.05435 | 0.8435006 | 3.83971 | pf | 0.9425872 | 2.17828  | pk |
| PFI1085w | PKH_071930 | PVX_099520 | PY00183 | PBANKA_082<br>300 | PCHAS_08233<br>0 | 1.83853 | 2.44449 | 3.73171 | 3.33917 | 2.16473 | 2.05945 | 0.57544 | 0.3771365 | 3.73171 | pv | 0.1778104 | 3.339168 | py |
| PFI1090w | PKH_071940 | PVX_099525 | PY06246 | PBANKA_082<br>310 | PCHAS_08234<br>0 | 4.26608 | 1.67456 | 2.78334 | 1.36137 | 0.80786 | 1.07763 | 0.91285 | 0.5144819 | 4.26608 | pf | 0.5648053 | 1.674557 | pk |
| PFI1100w | PKH_071960 | PVX_099530 | PY04548 | PBANKA_082<br>330 | PCHAS_08236<br>0 | 5.52362 | 2.30543 | 2.97686 | 1.9411  | 2.7385  | 2.61028 | 0.73036 | 0.2937635 | 5.52362 | pf | 0.2909925 | 2.305435 | pk |
| PFI1105w | PKH_071970 | PVX_099535 | PY04547 | PBANKA_082<br>340 | PCHAS_08237<br>0 | 2.89798 | 2.35735 | 2.58527 | 2.87493 | 2.98649 | 2.38228 | 0.23908 | 0.183384  | 2.35735 | pk | 0.1568145 | 2.585266 | pv |
| PFI1110w | PKH_071980 | PVX_099540 | PY04688 | PBANKA_082<br>350 | PCHAS_08238<br>0 | 1.51799 | 4.65906 | 5.41152 | 0.85082 | 2.17158 | 2.402   | 1.28925 | 0.9188859 | 4.65906 | pk | 0.5511927 | 5.411519 | pv |
| PFI1130c | PKH_072020 | PVX_099560 | PY02415 | PBANKA_082<br>390 | PCHAS_08242<br>0 | 1.79042 | 2.76012 | 0.24688 | 3.0194  | 2.24196 | 2.25964 | 0.62665 | 0.349427  | 0.24688 | pv | 0.2468417 | 3.019404 | py |
| PFI1135c | PKH_072030 | PVX_099565 | PY02414 | PBANKA_082<br>400 | PCHAS_08243<br>0 | 1.84644 | 5.22434 | 4.07578 | 0.44994 | 2.66231 | 0.56655 | 1.31527 | 1.0235308 | 4.07578 | pv | 1.25026   | 0.449937 | py |
| PFI1150w | PKH_072060 | PVX_099580 | PY02393 | PBANKA_082<br>430 | PCHAS_08246<br>0 | 2.95938 | 0.99462 | 5.8105  | 2.26225 | 2.45158 | 1.37674 | 0.96242 | 0.6079185 | 5.8105  | pv | 0.7598981 | 2.262249 | py |
| PFI1170c | PKH_072100 | PVX_099600 | PY02397 | PBANKA_082<br>470 | PCHAS_08250<br>0 | 4.03763 | 1.61645 | 2.81717 | 4.04113 | 1.94349 | 3.95641 | 0.94301 | 0.6636202 | 1.61645 | pk | 0.5447166 | 2.817175 | pv |
| PFI1175c | PKH_072110 | PVX_099605 | PY00009 | PBANKA_082<br>480 | PCHAS_08251<br>0 | 2.23977 | 0.91748 | 4.45551 | 0.87587 | 1.2185  | 3.48656 | 1.16319 | 0.7865967 | 4.45551 | pv | 0.897588  | 0.875869 | py |
| PFI1180w | PKH_072120 | PVX_099615 | PY06683 | PBANKA_082<br>490 | PCHAS_08252<br>0 | 6.11002 | 5.63935 | 3.71959 | 1.37262 | 0.6278  | 3.48276 | 1.30585 | 1.0889369 | 3.71959 | pv | 0.9747242 | 1.372624 | py |
| PFI1195c | PKH_072150 | PVX_099630 | PY05196 | PBANKA_082<br>520 | PCHAS_08255<br>0 | 5.32813 | 3.73283 | 3.69684 | 3.64004 | 3.38673 | 0.89777 | 0.80554 | 0.4068374 | 0.89777 | pc | 0.1007247 | 5.328128 | pf |
| PFI1205c | PKH_072170 | PVX_099640 | PY05199 | PBANKA_082<br>540 | PCHAS_08257<br>0 | 5.12803 | 5.46338 | 4.91724 | 3.77521 | 5.24277 | 5.5346  | 0.40338 | 0.1905419 | 3.77521 | py | 0.2381773 | 5.24277  | pb |
| PFI1210w | PKH_072180 | PVX_099645 | PY05371 | PBANKA_082<br>550 | PCHAS_08258<br>0 | 5.45247 | 5.56177 | 5.89182 | 5.09229 | 5.58222 | 4.31012 | 0.36349 | 0.185854  | 4.31012 | pc | 0.1498056 | 5.891816 | pv |
| PFI1215w | PKH_072190 | PVX_099650 | PY07291 | PBANKA_082<br>560 | PCHAS_08259<br>0 | 1.41997 | 2.48372 | 2.2934  | 5.85042 | 0.87759 | 1.92883 | 0.80686 | 0.4959099 | 5.85042 | py | 0.3570778 | 0.877592 | pb |
| PFI1235w | PKH_072230 | PVX_099675 | PY00928 | PBANKA_082<br>600 | PCHAS_08263<br>0 | 1.49652 | 1.91325 | 2.65181 | 1.67667 | 1.40315 | 1.78527 | 0.29566 | 0.1597686 | 2.65181 | pv | 0.1997108 | 1.67667  | py |
| PFI1245c | PKH_072250 | PVX_099685 | PY00926 | PBANKA_082<br>620 | PCHAS_08265<br>0 | 3.0206  | 2.91548 | 0.96114 | 0.59435 | 4.79087 | 4.20794 | 1.25807 | 1.0977952 | 0.96114 | pv | 0.7656824 | 0.594351 | py |
| PFI1255w | PKH_072270 | PVX_099695 | PY03878 | PBANKA_082<br>640 | PCHAS_08267<br>0 | 5.24465 | 5.89907 | 5.08067 | 4.45927 | 3.99598 | 4.55251 | 0.53611 | 0.3740159 | 5.89907 | pk | 0.3354794 | 5.080672 | pv |

|            |            |            |         |                   |                  |         |         |         |         |         |         |         |           |         |    |           |          |    |
|------------|------------|------------|---------|-------------------|------------------|---------|---------|---------|---------|---------|---------|---------|-----------|---------|----|-----------|----------|----|
| PFI1260c   | PKH_072280 | PVX_099700 | PY03877 | PBANKA_082<br>650 | PCHAS_08268<br>0 | 2.65045 | 2.5157  | 4.08485 | 5.15072 | 3.70653 | 4.04385 | 0.73446 | 0.5925114 | 5.15072 | py | 0.7406393 | 3.706528 | pb |
| PFI1270w   | PKH_072300 | PVX_099710 | PY00763 | PBANKA_082<br>670 | PCHAS_08270<br>0 | 2.07027 | 1.37222 | 1.02331 | 1.51738 | 1.73627 | 1.27168 | 0.27612 | 0.1917313 | 2.07027 | pf | 0.2396641 | 1.372216 | pk |
| PFI1275w   | PKH_072310 | PVX_099715 | PY00762 | PBANKA_082<br>680 | PCHAS_08271<br>0 | 2.86941 | 2.28221 | 2.38984 | 5.73648 | 3.82887 | 2.55196 | 0.85415 | 0.4052456 | 5.73648 | py | 0.1873288 | 3.828868 | pb |
| PFI1280c   | PKH_072320 | PVX_099725 | PY00761 | PBANKA_082<br>690 | PCHAS_08272<br>0 | 1.39327 | 0.59271 | 1.47973 | 5.14022 | 2.59561 | 1.82858 | 0.84348 | 0.4876431 | 5.14022 | py | 0.3305829 | 2.595612 | pb |
| PFI1285w   | PKH_072340 | PVX_099740 | PY04353 | PBANKA_082<br>710 | PCHAS_08274<br>0 | 6.2012  | 0.77591 | 6.05109 | 6.07231 | 5.96392 | 2.99662 | 0.72016 | 0.2490577 | 2.99662 | pc | 0.0646241 | 0.775912 | pk |
| PFI1295c   | PKH_072350 | PVX_099745 | PY04355 | PBANKA_082<br>720 | PCHAS_08275<br>0 | 4.62884 | 0.6204  | 4.62589 | 4.45183 | 5.14681 | 4.64072 | 0.49743 | 0.1419634 | 0.6204  | pk | 0.1767166 | 4.625892 | pv |
| PFI1310w   | PKH_072430 | PVX_099765 | PY00252 | PBANKA_082<br>750 | PCHAS_08278<br>0 | 3.17507 | 2.7475  | 3.13266 | 5.37392 | 1.48648 | 4.27419 | 0.90942 | 0.6430531 | 5.37392 | py | 0.3922726 | 1.486481 | pb |
| PFI1320c   | PKH_072470 | PVX_099780 | PY00254 | PBANKA_082<br>770 | PCHAS_08280<br>0 | 5.72581 | 4.71144 | 4.61874 | 5.45367 | 3.90824 | 1.69791 | 0.94434 | 0.5304981 | 1.69791 | pc | 0.4623224 | 3.908244 | pb |
| PFI1330c   | PKH_072490 | PVX_099790 | PY02909 | PBANKA_082<br>790 | PCHAS_08282<br>0 | 4.84437 | 3.16921 | 4.11887 | 5.58102 | 3.90659 | 3.58559 | 0.64715 | 0.4416893 | 5.58102 | py | 0.5521116 | 3.906595 | pb |
| PFI1355w   | PKH_072540 | PVX_099820 | PY00449 | PBANKA_082<br>840 | PCHAS_08287<br>0 | 4.77758 | 5.33374 | 4.88999 | 4.57122 | 4.79812 | 5.03854 | 0.18589 | 0.1159446 | 5.33374 | pk | 0.121963  | 4.889986 | pv |
| PFI1360c   | PKH_072560 | PVX_099825 | PY00448 | PBANKA_082<br>850 | PCHAS_08288<br>0 | 4.30634 | 3.9473  | 3.15637 | 4.73888 | 4.18837 | 5.21066 | 0.49397 | 0.3627765 | 3.15637 | pv | 0.3453348 | 4.738881 | py |
| PFI1370c   | PKH_072580 | PVX_099840 | PY05588 | PBANKA_082<br>870 | PCHAS_08290<br>0 | 5.18115 | 0.98593 | 4.35695 | 0.1542  | 3.65135 | 0.50889 | 1.21819 | 0.9046175 | 3.65135 | pb | 1.0421009 | 0.508887 | pc |
| PFI1415w   | PKH_072660 | PVX_099890 | PY04175 | PBANKA_082<br>960 | PCHAS_08299<br>0 | 3.61126 | 1.7846  | 2.93118 | 1.19553 | 1.92737 | 2.79263 | 0.73793 | 0.5487355 | 3.61126 | pf | 0.6502256 | 1.784599 | pk |
| PFI1420w   | PKH_072670 | PVX_099895 | PY04174 | PBANKA_082<br>970 | PCHAS_08300<br>0 | 2.21588 | 2.9817  | 2.18362 | 2.04123 | 1.50662 | 0.43077 | 0.5671  | 0.3299453 | 0.43077 | pc | 0.2129109 | 2.981701 | pk |
| PFI1435w   | PKH_072740 | PVX_099915 | PY05765 | PBANKA_083<br>000 | PCHAS_08303<br>0 | 1.57502 | 2.95878 | 2.7089  | 2.82898 | 3.00751 | 2.70617 | 0.30086 | 0.1102432 | 1.57502 | pf | 0.1053543 | 2.95878  | pk |
| PFI1455c   | PKH_072780 | PVX_099940 | PY05293 | PBANKA_083<br>040 | PCHAS_08307<br>0 | 5.69213 | 3.17751 | 0.5449  | 0.15329 | 0.07586 | 4.88678 | 0.96455 | 0.5371316 | 3.17751 | pk | 0.5541531 | 0.544904 | pv |
| PFI1460c   | PKH_072790 | PVX_099945 | PY05292 | PBANKA_083<br>050 | PCHAS_08308<br>0 | 4.06287 | 2.66986 | 3.76689 | 6.04244 | 2.84343 | 5.65946 | 1.08076 | 0.841808  | 6.04244 | py | 0.8213943 | 2.843431 | pb |
| PFI1475w   | PKH_072850 | PVX_099980 | PY05748 | PBANKA_083<br>100 | PCHAS_08313<br>0 | 5.55932 | 5.86248 | 5.43537 | 4.70346 | 5.44858 | 5.11889 | 0.26878 | 0.1735077 | 4.70346 | py | 0.2168846 | 5.448584 | pb |
| PFI1485c   | PKH_072870 | PVX_099990 | PY01867 | PBANKA_083<br>120 | PCHAS_08315<br>0 | 6.06456 | 5.92573 | 0.05476 | 5.19661 | 5.47058 | 5.75728 | 0.3173  | 0.2349297 | 5.19661 | py | 0.1798739 | 5.470579 | pb |
| PFI1490c-a | PKH_072880 | PVX_099995 | PY03175 | PBANKA_083<br>130 | PCHAS_08316<br>0 | 2.49937 | 0.20661 | 4.73663 | 2.66682 | 3.51257 | 2.57038 | 0.93994 | 0.6358896 | 0.20661 | pk | 0.2774096 | 4.736626 | pv |
| PFI1495w   | PKH_072890 | PVX_100000 | PY03176 | PBANKA_083<br>140 | PCHAS_08317<br>0 | 2.04076 | 2.94894 | 2.46806 | 6.07685 | 3.45382 | 2.59161 | 0.78198 | 0.3787885 | 6.07685 | py | 0.2579326 | 3.453823 | pb |
| PFI1505c   | PKH_072930 | PVX_087155 | PY07561 | PBANKA_083<br>180 | PCHAS_08321<br>0 | 4.71561 | 3.54937 | 2.28177 | 2.9448  | 0.48717 | 0.42284 | 1.33634 | 1.0992099 | 0.42284 | pc | 0.7596043 | 0.487169 | pb |

|          |            |            |         |               |              |         |         |         |         |         |         |         |           |         |    |           |          |    |
|----------|------------|------------|---------|---------------|--------------|---------|---------|---------|---------|---------|---------|---------|-----------|---------|----|-----------|----------|----|
| PFI1525w | PKH_072970 | PVX_087135 | PY07648 | PBANKA_083220 | PCHAS_083250 | 3.80461 | 3.89614 | 3.09763 | 2.44157 | 3.71807 | 3.369   | 0.41843 | 0.2468235 | 2.44157 | py | 0.3085294 | 3.718066 | pb |
| PFI1540w | PKH_073000 | PVX_087120 | PY03213 | PBANKA_083250 | PCHAS_083280 | 1.65967 | 1.39467 | 4.34917 | 5.35924 | 5.39178 | 1.62642 | 1.34266 | 1.0202874 | 4.34917 | pv | 0.6957053 | 5.359237 | py |
| PFI1545c | PKH_073010 | PVX_087115 | PY03212 | PBANKA_083260 | PCHAS_083290 | 3.8966  | 4.29985 | 3.98477 | 3.51048 | 3.63896 | 3.64272 | 0.23151 | 0.1463854 | 4.29985 | pk | 0.097468  | 3.984774 | pv |
| PFI1550c | PKH_073020 | PVX_087110 | PY03211 | PBANKA_083270 | PCHAS_083300 | 5.93467 | 0.36885 | 6.13358 | 5.01469 | 5.61477 | 0.05923 | 0.42732 | 0.2890012 | 5.01469 | py | 0.2315485 | 5.614773 | pb |
| PFI1565w | PKH_073040 | PVX_087095 | PY03207 | PBANKA_083300 | PCHAS_083330 | 5.263   | 5.99798 | 4.63061 | 4.14758 | 4.90355 | 4.35837 | 0.50466 | 0.3321195 | 5.99798 | pk | 0.4151494 | 4.630612 | pv |
| PFI1570c | PKH_073050 | PVX_087090 | PY03205 | PBANKA_083310 | PCHAS_083340 | 2.74574 | 2.22338 | 2.47204 | 2.93667 | 2.53753 | 3.25495 | 0.28407 | 0.1973999 | 3.25495 | pc | 0.168211  | 2.223377 | pk |
| PFI1575c | PKH_073060 | PVX_087085 | PY03620 | PBANKA_083320 | PCHAS_083350 | 4.17964 | 3.10356 | 3.38958 | 3.91155 | 4.01715 | 2.69117 | 0.48734 | 0.3407289 | 2.69117 | pc | 0.3588872 | 4.179641 | pf |
| PFI1585c | PKH_073080 | PVX_087075 | PY03622 | PBANKA_083340 | PCHAS_083370 | 4.03332 | 2.3205  | 3.28151 | 5.84478 | 3.67275 | 4.42575 | 0.83818 | 0.5714126 | 5.84478 | py | 0.7142657 | 3.672752 | pb |
| PFI1595c | PKH_073110 | PVX_087060 | PY02605 | PBANKA_083370 | PCHAS_083400 | 1.80271 | 4.49554 | 5.56594 | 4.46303 | 1.74939 | 3.00453 | 1.32798 | 1.0812951 | 5.56594 | pv | 0.9869943 | 4.463031 | py |
| PFI1600w | PKH_073120 | PVX_087055 | PY02603 | PBANKA_083380 | PCHAS_083410 | 0.93215 | 3.94672 | 4.60641 | 0.83715 | 5.68945 | 2.13289 | 1.40752 | 1.0671123 | 3.94672 | pk | 0.705408  | 4.606409 | pv |
| PFI1625c | PKH_073170 | PVX_087035 | PY01832 | PBANKA_083440 | PCHAS_083470 | 3.1466  | 3.8339  | 2.91679 | 4.66594 | 3.67078 | 4.52991 | 0.54926 | 0.4756933 | 2.91679 | pv | 0.3866063 | 4.66594  | py |
| PFI1630c | PKH_073180 | PVX_087030 | PY01831 | PBANKA_083450 | PCHAS_083480 | 4.4624  | 3.05641 | 2.38433 | 5.65467 | 4.34809 | 3.48454 | 0.92331 | 0.6739481 | 5.65467 | py | 0.6265496 | 4.348086 | pb |
| PFI1635w | PKH_073190 | PVX_087025 | PY01830 | PBANKA_083460 | PCHAS_083490 | 1.67439 | 3.6877  | 3.39667 | 0.19647 | 1.49657 | 4.43182 | 1.33859 | 0.9897109 | 0.19647 | py | 0.7621148 | 1.496575 | pb |
| PFI1650w | PKH_073220 | PVX_087010 | PY00738 | PBANKA_083490 | PCHAS_083520 | 2.46317 | 1.83129 | 2.854   | 5.11955 | 3.96489 | 4.48629 | 1.07038 | 0.8313435 | 5.11955 | py | 0.7614592 | 3.964885 | pb |
| PFI1660w | PKH_073240 | PVX_087000 | PY06099 | PBANKA_083510 | PCHAS_083540 | 4.53238 | 2.36146 | 3.82756 | 4.66529 | 4.13283 | 4.27222 | 0.52467 | 0.2474558 | 2.36146 | pk | 0.1981543 | 3.827562 | pv |
| PFI1665w | PKH_073250 | PVX_086995 | PY06100 | PBANKA_083520 | PCHAS_083550 | 4.39144 | 2.84611 | 3.76543 | 3.20929 | 3.92532 | 2.27532 | 0.62525 | 0.4522726 | 2.27532 | pc | 0.4088384 | 4.39144  | pf |
| PFI1670c | PKH_073260 | PVX_086990 | PY06101 | PBANKA_083530 | PCHAS_083560 | 3.55265 | 3.81834 | 2.76572 | 0.04316 | 3.14018 | 1.0353  | 1.11117 | 0.713995  | 0.04316 | py | 0.8924937 | 3.140184 | pb |
| PFI1675w | PKH_073270 | PVX_086985 | PY05237 | PBANKA_083540 | PCHAS_083570 | 6.1687  | 0.18427 | 5.22063 | 5.95128 | 0.19073 | 3.44578 | 0.74873 | 0.3538926 | 3.44578 | pc | 0.2053467 | 5.220628 | pv |
| PFI1680w | PKH_073280 | PVX_086980 | PY05236 | PBANKA_083550 | PCHAS_083580 | 4.0128  | 5.88732 | 0.25913 | 3.62064 | 4.67272 | 5.1866  | 0.88501 | 0.6880961 | 0.25913 | pv | 0.5970995 | 3.620642 | py |
| PFI1690c | PKH_073300 | PVX_086970 | PY05234 | PBANKA_083570 | PCHAS_083600 | 0.91751 | 0.35331 | 5.9165  | 0.06683 | 4.55967 | 5.12923 | 0.76363 | 0.5582927 | 4.55967 | pb | 0.3926704 | 5.129229 | pc |
| PFI1695c | PKH_073310 | PVX_086965 | PY01195 | PBANKA_083580 | PCHAS_083610 | 2.85954 | 3.24212 | 3.07338 | 4.55966 | 3.7034  | 0.58408 | 0.83136 | 0.466027  | 0.58408 | pc | 0.2531502 | 4.559658 | py |
| PFI1730w | PKH_073370 | PVX_086930 | PY06117 | PBANKA_083630 | PCHAS_083660 | 5.23458 | 5.7053  | 4.9919  | 4.96156 | 3.55318 | 5.69543 | 0.52144 | 0.2894509 | 3.55318 | pb | 0.2466009 | 5.695426 | pc |



|          |            |            |         |               |              |         |         |         |         |         |         |         |           |         |    |           |          |    |
|----------|------------|------------|---------|---------------|--------------|---------|---------|---------|---------|---------|---------|---------|-----------|---------|----|-----------|----------|----|
| PFL0075w | PKH_130020 | PVX_084100 | PY01480 | PBANKA_060050 | PCHAS_060240 | 1.61546 | 2.34474 | 2.20219 | 2.09626 | 1.83599 | 1.55111 | 0.27344 | 0.2263739 | 2.34474 | pk | 0.1914188 | 2.202186 | pv |
| PFL0120c | PKH_130110 | PVX_084165 | PY01525 | PBANKA_060140 | PCHAS_060320 | 4.39317 | 3.4791  | 3.20769 | 6.27491 | 3.12101 | 3.34244 | 0.74601 | 0.3087133 | 6.27491 | py | 0.330534  | 3.121014 | pb |
| PFL0125c | PKH_130120 | PVX_084170 | PY01523 | PBANKA_060150 | PCHAS_060330 | 1.17802 | 1.35923 | 0.46431 | 4.34927 | 3.30172 | 0.95801 | 1.05843 | 0.6477281 | 4.34927 | py | 0.2787337 | 3.301723 | pb |
| PFL0130c | PKH_130140 | PVX_084175 | PY01520 | PBANKA_060160 | PCHAS_060340 | 5.16833 | 4.19655 | 4.05942 | 2.32014 | 3.20075 | 2.58898 | 0.88574 | 0.6693704 | 5.16833 | pf | 0.5877624 | 4.19655  | pk |
| PFL0150w | PKH_130180 | PVX_084195 | PY05283 | PBANKA_060200 | PCHAS_060380 | 4.25501 | 3.85302 | 5.78315 | 4.36822 | 0.66866 | 4.80404 | 0.8438  | 0.4958301 | 0.66866 | pb | 0.5108346 | 4.804036 | pc |
| PFL0165c | PKH_130210 | PVX_084210 | PY05286 | PBANKA_060230 | PCHAS_060410 | 4.40332 | 5.59751 | 3.29736 | 1.5853  | 3.96506 | 3.95973 | 0.85392 | 0.5487466 | 1.5853  | py | 0.6859332 | 3.965064 | pb |
| PFL0175c | PKH_130220 | PVX_084220 | PY05913 | PBANKA_060250 | PCHAS_060430 | 1.3845  | 1.27968 | 1.56623 | 1.87443 | 1.02596 | 0.76027 | 0.29321 | 0.2328995 | 1.87443 | py | 0.2276933 | 1.025957 | pb |
| PFL0180w | PKH_130230 | PVX_084225 | PY05914 | PBANKA_060260 | PCHAS_060440 | 2.73666 | 2.17911 | 2.39707 | 0.84414 | 2.97629 | 6.27405 | 0.84932 | 0.5379415 | 6.27405 | pc | 0.2841935 | 0.84414  | py |
| PFL0185c | PKH_130240 | PVX_084230 | PY05915 | PBANKA_060270 | PCHAS_060450 | 2.65437 | 3.22667 | 3.03999 | 2.16488 | 3.43357 | 2.95457 | 0.32107 | 0.2102612 | 2.16488 | py | 0.1644318 | 3.433566 | pb |
| PFL0190w | PKH_130250 | PVX_084235 | PY03025 | PBANKA_060280 | PCHAS_060460 | 0.60779 | 4.47721 | 2.32651 | 5.8141  | 2.57872 | 4.29382 | 1.33054 | 1.077218  | 0.60779 | pf | 1.253778  | 4.477209 | pk |
| PFL0200c | PKH_130270 | PVX_084245 | PY00981 | PBANKA_060300 | PCHAS_060480 | 2.87882 | 4.96429 | 1.56389 | 1.17067 | 3.78019 | 3.27541 | 1.06775 | 0.8642069 | 4.96429 | pk | 0.7515268 | 1.563889 | pv |
| PFL0205w | PKH_130280 | PVX_084250 | PY00982 | PBANKA_060310 | PCHAS_060490 | 3.88116 | 4.36275 | 2.6441  | 4.88734 | 2.93116 | 2.56174 | 0.83237 | 0.6076141 | 4.88734 | py | 0.7595177 | 2.931164 | pb |
| PFL0210c | PKH_130290 | PVX_084255 | PY00983 | PBANKA_060320 | PCHAS_060500 | 2.85698 | 1.95918 | 4.33905 | 2.64601 | 3.42862 | 3.70443 | 0.66832 | 0.5080964 | 1.95918 | pk | 0.4075134 | 4.33905  | pv |
| PFL0225c | PKH_130310 | PVX_084265 | PY04716 | PBANKA_060340 | PCHAS_060520 | 2.71634 | 3.96938 | 3.7751  | 4.00026 | 2.78433 | 3.92539 | 0.43654 | 0.2820426 | 2.71634 | pf | 0.3415559 | 3.969377 | pk |
| PFL0230w | PKH_130320 | PVX_084270 | PY04717 | PBANKA_060350 | PCHAS_060530 | 1.85454 | 5.26009 | 2.65661 | 5.34662 | 3.13996 | 1.87716 | 1.22639 | 0.9509755 | 5.26009 | pk | 1.0247889 | 2.656612 | pv |
| PFL0315c | PKH_130540 | PVX_084350 | PY01844 | PBANKA_060490 | PCHAS_060670 | 5.56734 | 5.82504 | 5.5291  | 0.29322 | 5.48969 | 0.01899 | 0.35291 | 0.2216821 | 0.29322 | py | 0.2576905 | 5.489695 | pb |
| PFL0320w | PKH_130550 | PVX_084355 | PY01845 | PBANKA_060500 | PCHAS_060680 | 5.72642 | 5.7928  | 5.86103 | 4.71178 | 4.33305 | 5.87349 | 0.45934 | 0.2592636 | 4.33305 | pb | 0.3039058 | 5.873494 | pc |
| PFL0325w | PKH_130555 | PVX_084360 | PY01846 | PBANKA_060510 | PCHAS_060690 | 0.76025 | 4.49363 | 0.34458 | 0.66806 | 0.24977 | 1.26955 | 0.64884 | 0.2870897 | 4.49363 | pk | 0.2779923 | 0.344576 | pv |
| PFL0330c | PKH_130560 | PVX_084365 | PY01847 | PBANKA_060520 | PCHAS_060700 | 1.70419 | 1.86048 | 1.84436 | 2.06311 | 1.48543 | 1.68302 | 0.14922 | 0.1072781 | 2.06311 | py | 0.0794083 | 1.485432 | pb |
| PFL0390c | PKH_130670 | PVX_084425 | PY04167 | PBANKA_060630 | PCHAS_060810 | 1.37261 | 2.58293 | 0.25198 | 5.01799 | 0.76198 | 1.85323 | 1.01    | 0.6844404 | 5.01799 | py | 0.7028933 | 0.761978 | pb |
| PFL0405w | PKH_130700 | PVX_084440 | PY03518 | PBANKA_060660 | PCHAS_060840 | 1.58904 | 0.95182 | 1.88397 | 1.77733 | 1.05743 | 1.59796 | 0.27683 | 0.2029653 | 0.95182 | pk | 0.1822041 | 1.883972 | pv |
| PFL0410w | PKH_130710 | PVX_084445 | PY00076 | PBANKA_060670 | PCHAS_060850 | 6.10381 | 3.63615 | 5.59571 | 4.75156 | 3.85509 | 5.13179 | 0.76475 | 0.6472522 | 6.10381 | pf | 0.5302133 | 3.636154 | pk |

|          |            |            |         |               |              |         |         |         |         |         |         |         |           |         |    |           |          |    |
|----------|------------|------------|---------|---------------|--------------|---------|---------|---------|---------|---------|---------|---------|-----------|---------|----|-----------|----------|----|
| PFL0440c | PKH_130770 | PVX_084470 | PY06576 | PBANKA_060730 | PCHAS_060910 | 0.80512 | 5.11655 | 0.42677 | 1.5786  | 1.04724 | 1.28539 | 0.641   | 0.3264205 | 5.11655 | pk | 0.2529068 | 0.426767 | pv |
| PFL0450c | PKH_130790 | PVX_084480 | PY06694 | PBANKA_060750 | PCHAS_060930 | 2.42618 | 6.26115 | 2.12613 | 4.43472 | 3.04714 | 2.94746 | 0.98317 | 0.58591   | 6.26115 | pk | 0.5270546 | 2.126128 | pv |
| PFL0460w | PKH_130810 | PVX_084490 | PY03614 | PBANKA_060760 | PCHAS_060940 | 1.84702 | 3.21782 | 2.57074 | 6.07661 | 3.15021 | 2.76178 | 0.81977 | 0.3900536 | 6.07661 | py | 0.3904592 | 3.150209 | pb |
| PFL0470w | PKH_130830 | PVX_084500 | PY07576 | PBANKA_060780 | PCHAS_060960 | 6.19322 | 5.32416 | 5.11912 | 5.66654 | 5.48881 | 5.44152 | 0.24396 | 0.1424125 | 6.19322 | pf | 0.1486774 | 5.324164 | pk |
| PFL0480w | PKH_130850 | PVX_084510 | PY01828 | PBANKA_060800 | PCHAS_060980 | 6.08783 | 2.99445 | 6.18323 | 4.7759  | 5.40095 | 3.6455  | 1.04269 | 0.7699328 | 2.99445 | pk | 0.7668463 | 6.18323  | pv |
| PFL0495c | PKH_130880 | PVX_084520 | PY01826 | PBANKA_060830 | PCHAS_061010 | 3.93488 | 3.22144 | 3.75469 | 2.77964 | 3.4478  | 5.40152 | 0.60704 | 0.3376988 | 5.40152 | pc | 0.2550842 | 2.779644 | py |
| PFL0500w | PKH_130900 | PVX_084525 | PY03485 | PBANKA_060840 | PCHAS_061020 | 4.08154 | 4.81289 | 2.62111 | 2.54776 | 3.23746 | 2.35066 | 0.76873 | 0.4841162 | 4.81289 | pk | 0.6051453 | 2.62111  | pv |
| PFL0505c | PKH_130910 | PVX_084535 | PY03484 | PBANKA_060850 | PCHAS_061030 | 5.08515 | 0.18046 | 6.14189 | 6.13612 | 6.03999 | 6.23244 | 0.26278 | 0.103994  | 5.08515 | pf | 0.0495552 | 0.180456 | pk |
| PFL0510c | PKH_130920 | PVX_084540 | PY03482 | PBANKA_060860 | PCHAS_061040 | 0.7743  | 3.58556 | 0.74802 | 1.45794 | 0.89249 | 1.95445 | 0.76386 | 0.3780136 | 3.58556 | pk | 0.4363991 | 0.748016 | pv |
| PFL0515w | PKH_130930 | PVX_084545 | PY07010 | PBANKA_060870 | PCHAS_061050 | 2.14806 | 2.85393 | 2.20886 | 6.00426 | 2.74716 | 2.10917 | 0.63861 | 0.2687715 | 6.00426 | py | 0.2013892 | 2.74716  | pb |
| PFL0520c | PKH_130950 | PVX_084555 | PY03064 | PBANKA_060890 | PCHAS_061070 | 0.9645  | 2.12658 | 2.77201 | 2.54409 | 3.63383 | 2.43276 | 0.57102 | 0.3692994 | 0.9645  | pf | 0.3572461 | 2.126577 | pk |
| PFL0525w | PKH_130960 | PVX_084560 | PY03063 | PBANKA_060900 | PCHAS_061080 | 1.24571 | 2.58028 | 2.35281 | 0.06183 | 1.79294 | 2.04269 | 0.64588 | 0.3788892 | 0.06183 | py | 0.4111752 | 1.792943 | pb |
| PFL0530c | PKH_130970 | PVX_084565 | PY02289 | PBANKA_060910 | PCHAS_061090 | 1.03029 | 0.95301 | 1.03537 | 2.12764 | 0.53373 | 1.33376 | 0.32996 | 0.1764767 | 2.12764 | py | 0.0964582 | 0.533735 | pb |
| PFL0535c | PKH_130980 | PVX_084570 | PY02288 | PBANKA_060920 | PCHAS_061100 | 4.34828 | 5.43718 | 3.4889  | 0.92896 | 3.66606 | 5.52276 | 1.11147 | 0.7609946 | 0.92896 | py | 0.7806881 | 3.666063 | pb |
| PFL0565w | PKH_131040 | PVX_084600 | PY01224 | PBANKA_060990 | PCHAS_061160 | 2.57375 | 2.00771 | 3.59654 | 1.1285  | 3.97877 | 6.27599 | 1.17001 | 0.887821  | 6.27599 | pc | 0.7585205 | 3.978771 | pb |
| PFL0580w | PKH_131065 | PVX_084615 | PY04668 | PBANKA_061020 | PCHAS_061190 | 4.37981 | 5.34014 | 5.0607  | 4.41163 | 4.76591 | 4.75    | 0.27088 | 0.2070335 | 5.34014 | pk | 0.181117  | 5.060699 | pv |
| PFL0590c | PKH_131080 | PVX_084625 | PY03970 | PBANKA_061040 | PCHAS_061210 | 1.49182 | 1.3652  | 0.72172 | 2.90091 | 1.46653 | 1.9143  | 0.45893 | 0.2638427 | 2.90091 | py | 0.3298034 | 1.466531 | pb |
| PFL0600w | PKH_131100 | PVX_084635 | PY06936 | PBANKA_061060 | PCHAS_061230 | 3.72848 | 2.8331  | 2.70564 | 0.99036 | 4.86174 | 5.32407 | 1.23086 | 0.9294141 | 0.99036 | py | 0.8784522 | 4.861737 | pb |
| PFL0615w | PKH_142970 | PVX_123325 | PY06588 | PBANKA_142840 | PCHAS_143020 | 3.60876 | 3.18098 | 2.23196 | 3.76751 | 4.30078 | 5.0518  | 0.68306 | 0.5125687 | 2.23196 | pv | 0.6407109 | 3.767508 | py |
| PFL0620c | PKH_142980 | PVX_123330 | PY06015 | PBANKA_142850 | PCHAS_143030 | 3.14855 | 5.73831 | 3.98168 | 3.79684 | 2.63224 | 5.33907 | 0.91357 | 0.7079917 | 5.73831 | pk | 0.8387797 | 3.981681 | pv |
| PFL0625c | PKH_143000 | PVX_123340 | PY04546 | PBANKA_142870 | PCHAS_143050 | 2.11503 | 1.7568  | 2.55312 | 2.28932 | 2.1893  | 2.09099 | 0.17815 | 0.1272857 | 1.7568  | pk | 0.0681502 | 2.553123 | pv |
| PFL0630w | PKH_143010 | PVX_123345 | PY04921 | PBANKA_142880 | PCHAS_143060 | 5.0379  | 0.85259 | 5.5039  | 4.91791 | 3.95837 | 4.67263 | 0.68811 | 0.3821614 | 0.85259 | pk | 0.3312045 | 5.503903 | pv |



|          |            |            |         |                   |                  |         |         |         |         |         |         |         |           |         |    |           |          |    |
|----------|------------|------------|---------|-------------------|------------------|---------|---------|---------|---------|---------|---------|---------|-----------|---------|----|-----------|----------|----|
| PFL0635c | PKH_143020 | PVX_123350 | PY04922 | PBANKA_142<br>890 | PCHAS_14307<br>0 | 0.70623 | 0.52901 | 5.93492 | 0.67117 | 2.58083 | 3.89564 | 1.0275  | 0.6212624 | 3.89564 | pc | 0.2991622 | 2.580832 | pb |
| PFL0660w | PKH_143090 | PVX_123370 | PY02016 | PBANKA_142<br>940 | PCHAS_14313<br>0 | 3.66261 | 4.96879 | 5.76348 | 5.3655  | 5.62556 | 4.84824 | 0.54582 | 0.3144018 | 3.66261 | pf | 0.293827  | 4.968795 | pk |
| PFL0665c | PKH_143100 | PVX_123375 | PY02017 | PBANKA_142<br>950 | PCHAS_14314<br>0 | 1.95249 | 1.74556 | 2.08472 | 0.81235 | 2.53204 | 6.23215 | 0.67707 | 0.4117723 | 6.23215 | pc | 0.369829  | 2.532039 | pb |
| PFL0670c | PKH_143110 | PVX_123380 | PY02018 | PBANKA_142<br>960 | PCHAS_14315<br>0 | 2.377   | 3.89834 | 1.63514 | 2.60473 | 2.75367 | 2.88294 | 0.48635 | 0.3248949 | 3.89834 | pk | 0.1637222 | 1.635139 | pv |
| PFL0680c | PKH_143130 | PVX_123390 | PY02020 | PBANKA_142<br>980 | PCHAS_14317<br>0 | 4.31802 | 2.8175  | 4.50617 | 4.85168 | 3.45536 | 0.87672 | 0.98781 | 0.6169973 | 0.87672 | pc | 0.3961167 | 2.8175   | pk |
| PFL0690c | PKH_143150 | PVX_123400 | PY02023 | PBANKA_143<br>000 | PCHAS_14319<br>0 | 2.88535 | 3.24557 | 3.38443 | 2.17396 | 3.31783 | 1.58681 | 0.55029 | 0.3285912 | 1.58681 | pc | 0.1428355 | 2.173957 | py |
| PFL0692c | PKH_143160 | PVX_123405 | PY02024 | PBANKA_143<br>010 | PCHAS_14320<br>0 | 2.62665 | 3.00912 | 2.34311 | 2.40916 | 3.42472 | 3.83921 | 0.48235 | 0.3363131 | 3.83921 | pc | 0.2208735 | 3.424718 | pb |
| PFL0705c | PKH_143180 | PVX_123415 | PY07468 | PBANKA_143<br>040 | PCHAS_14323<br>0 | 2.08059 | 2.98748 | 1.21269 | 5.67272 | 3.04599 | 1.94833 | 0.92725 | 0.5744915 | 5.67272 | py | 0.4767634 | 3.045994 | pb |
| PFL0730w | PKH_143230 | PVX_123440 | PY02748 | PBANKA_143<br>090 | PCHAS_14328<br>0 | 1.97475 | 3.32467 | 0.21319 | 3.91451 | 4.23879 | 3.5818  | 0.96141 | 0.5707766 | 0.21319 | pv | 0.6302935 | 3.91451  | py |
| PFL0735w | PKH_143240 | PVX_123445 | PY02749 | PBANKA_143<br>100 | PCHAS_14329<br>0 | 4.51683 | 3.49508 | 3.93504 | 4.35454 | 3.31561 | 3.01805 | 0.49628 | 0.4121361 | 3.01805 | pc | 0.369723  | 4.51683  | pf |
| PFL0745c | PKH_143260 | PVX_123455 | PY07048 | PBANKA_143<br>110 | PCHAS_14331<br>0 | 4.35198 | 0.59275 | 4.91066 | 5.00725 | 3.35539 | 4.23003 | 0.80941 | 0.4664994 | 0.59275 | pk | 0.4434538 | 4.910662 | pv |
| PFL0765w | PKH_143300 | PVX_123475 | PY02272 | PBANKA_143<br>160 | PCHAS_14336<br>0 | 3.09532 | 5.82117 | 5.54637 | 3.2568  | 4.02697 | 4.58872 | 0.92953 | 0.7565951 | 5.82117 | pk | 0.5658937 | 5.546372 | pv |
| PFL0780w | PKH_143330 | PVX_123490 | PY05585 | PBANKA_143<br>190 | PCHAS_14339<br>0 | 1.83622 | 0.05283 | 1.86261 | 3.2222  | 3.11609 | 4.46724 | 1.17565 | 0.7981225 | 0.05283 | pk | 0.6842841 | 1.862614 | pv |
| PFL0785c | PKH_143350 | PVX_123495 | PY05584 | PBANKA_143<br>200 | PCHAS_14340<br>0 | 1.14722 | 5.54949 | 2.29442 | 2.15912 | 3.51399 | 1.57339 | 0.99677 | 0.6175584 | 5.54949 | pk | 0.7381252 | 2.294415 | pv |
| PFL0795c | PKH_143370 | PVX_123505 | PY00179 | PBANKA_143<br>220 | PCHAS_14342<br>0 | 0.83881 | 6.23368 | 3.62943 | 5.79016 | 0.00731 | 3.03582 | 1.1797  | 0.7985809 | 3.03582 | pc | 0.3471624 | 3.629428 | pv |
| PFL0805w | PKH_143390 | PVX_123515 | PY00181 | PBANKA_143<br>240 | PCHAS_14344<br>0 | 1.58788 | 3.68978 | 0.21695 | 6.2528  | 1.1583  | 2.79053 | 1.12055 | 0.8383687 | 3.68978 | pk | 0.8126233 | 0.216951 | pv |
| PFL0815w | PKH_143400 | PVX_123520 | PY01558 | PBANKA_143<br>250 | PCHAS_14345<br>0 | 2.32893 | 1.59561 | 2.16224 | 2.0011  | 0.70808 | 2.19542 | 0.39697 | 0.1855303 | 0.70808 | pb | 0.2236176 | 2.195423 | pc |
| PFL0820c | PKH_143410 | PVX_123525 | PY01559 | PBANKA_143<br>260 | PCHAS_14346<br>0 | 3.42074 | 3.39272 | 5.25942 | 4.72703 | 3.67706 | 3.31952 | 0.58842 | 0.3383705 | 5.25942 | pv | 0.0963902 | 4.727035 | py |
| PFL0830w | PKH_143430 | PVX_123535 | PY01560 | PBANKA_143<br>280 | PCHAS_14348<br>0 | 1.41613 | 0.95589 | 1.69236 | 1.83856 | 0.88209 | 1.61389 | 0.31512 | 0.2317815 | 0.88209 | pb | 0.2897269 | 1.613888 | pc |
| PFL0835w | PKH_143440 | PVX_123540 | PY05368 | PBANKA_143<br>290 | PCHAS_14349<br>0 | 4.17965 | 3.51329 | 2.88536 | 2.93401 | 2.33689 | 2.15047 | 0.54237 | 0.3919893 | 4.17965 | pf | 0.3330056 | 3.513286 | pk |
| PFL0845w | PKH_143460 | PVX_123550 | PY04727 | PBANKA_143<br>310 | PCHAS_14351<br>0 | 1.03966 | 1.20584 | 0.66803 | 5.868   | 6.22893 | 5.71443 | 0.65862 | 0.5383244 | 1.20584 | pk | 0.4923355 | 0.668026 | pv |
| PFL0850w | PKH_143470 | PVX_123555 | PY04728 | PBANKA_143<br>320 | PCHAS_14352<br>0 | 0.59586 | 3.25458 | 0.07585 | 5.88362 | 1.32945 | 1.51722 | 0.97152 | 0.6340755 | 3.25458 | pk | 0.6625931 | 0.075853 | pv |

|          |            |            |         |               |              |         |         |         |         |         |         |         |           |         |    |           |          |    |
|----------|------------|------------|---------|---------------|--------------|---------|---------|---------|---------|---------|---------|---------|-----------|---------|----|-----------|----------|----|
| PFL0860c | PKH_143490 | PVX_123565 | PY04730 | PBANKA_143340 | PCHAS_143540 | 1.33641 | 0.19307 | 0.78248 | 1.42729 | 1.01478 | 1.83116 | 0.43409 | 0.292237  | 0.19307 | pk | 0.2268122 | 0.782478 | pv |
| PFL0865w | PKH_143500 | PVX_123570 | PY04731 | PBANKA_143350 | PCHAS_143550 | 5.41262 | 0.44276 | 6.2283  | 2.78265 | 4.77609 | 2.3618  | 1.33662 | 1.0364435 | 2.78265 | py | 0.9324999 | 4.776086 | pb |
| PFL0870w | PKH_143510 | PVX_123575 | PY04732 | PBANKA_143360 | PCHAS_143560 | 6.16408 | 0.15168 | 5.99253 | 5.70939 | 6.17682 | 5.76538 | 0.21808 | 0.1732249 | 0.15168 | pk | 0.2165311 | 5.99253  | pv |
| PFL0925w | PKH_143610 | PVX_123615 | PY01855 | PBANKA_143460 | PCHAS_143660 | 4.55404 | 6.22405 | 5.67112 | 4.60802 | 5.6408  | 5.34416 | 0.50496 | 0.4299723 | 6.22405 | pk | 0.4557258 | 5.67112  | pv |
| PFL0930w | PKH_143620 | PVX_123620 | PY01854 | PBANKA_143470 | PCHAS_143670 | 3.41787 | 0.2068  | 3.75617 | 4.61314 | 3.74262 | 6.00444 | 1.03182 | 0.691418  | 0.2068  | pk | 0.8642725 | 3.756167 | pv |
| PFL0950c | PKH_143630 | PVX_123625 | PY01853 | PBANKA_143480 | PCHAS_143680 | 2.00766 | 5.58658 | 2.62607 | 5.65584 | 3.31722 | 1.2439  | 1.3385  | 1.0653464 | 5.58658 | pk | 1.1770817 | 2.626067 | pv |
| PFL0965c | PKH_143660 | PVX_123640 | PY01806 | PBANKA_143520 | PCHAS_143720 | 0.75134 | 3.31566 | 0.30537 | 0.20389 | 0.08748 | 1.33182 | 0.80035 | 0.3583587 | 3.31566 | pk | 0.4479483 | 0.305368 | pv |
| PFL0970w | PKH_143670 | PVX_123645 | PY01805 | PBANKA_143530 | PCHAS_143730 | 1.94152 | 2.31839 | 3.01915 | 5.63134 | 5.29386 | 0.30093 | 1.43655 | 1.1376917 | 5.29386 | pb | 1.0119685 | 0.300935 | pc |
| PFL0975w | PKH_143690 | PVX_123655 | PY05225 | PBANKA_143550 | PCHAS_143750 | 4.91185 | 5.06574 | 5.2661  | 3.05824 | 4.81049 | 5.05299 | 0.43404 | 0.1219011 | 3.05824 | py | 0.0917508 | 4.810485 | pb |
| PFL0990w | PKH_143720 | PVX_123670 | PY06627 | PBANKA_143580 | PCHAS_143780 | 3.35886 | 4.54797 | 3.03963 | 4.74501 | 3.85799 | 4.15134 | 0.53131 | 0.4152259 | 3.03963 | pv | 0.3706145 | 4.745011 | py |
| PFL1010c | PKH_143760 | PVX_123685 | PY03491 | PBANKA_143620 | PCHAS_143820 | 4.55545 | 3.51579 | 4.68945 | 0.91382 | 4.93517 | 5.10143 | 0.74549 | 0.3930744 | 0.91382 | py | 0.4299129 | 4.935171 | pb |
| PFL1020w | PKH_143780 | PVX_123695 | PY05399 | PBANKA_143640 | PCHAS_143840 | 2.62248 | 0.06938 | 5.68796 | 0.07374 | 2.0123  | 4.93617 | 1.0969  | 0.8056563 | 2.62248 | pf | 1.0070704 | 0.069381 | pk |
| PFL1030w | PKH_143800 | PVX_123705 | PY01137 | PBANKA_143660 | PCHAS_143860 | 0.36537 | 4.09038 | 0.64174 | 5.68735 | 0.2213  | 3.04984 | 1.10405 | 0.7591511 | 3.04984 | pc | 0.345412  | 4.090375 | pk |
| PFL1035w | PKH_143810 | PVX_123710 | PY01136 | PBANKA_143670 | PCHAS_143870 | 3.1341  | 2.62524 | 2.57157 | 2.28257 | 4.12917 | 2.3533  | 0.44684 | 0.2246939 | 4.12917 | pb | 0.2262992 | 2.353301 | pc |
| PFL1040w | PKH_143820 | PVX_123715 | PY01135 | PBANKA_143680 | PCHAS_143880 | 3.83686 | 6.27139 | 3.84005 | 4.95413 | 3.81675 | 3.38888 | 0.67051 | 0.3177094 | 6.27139 | pk | 0.3963407 | 3.840048 | pv |
| PFL1050w | PKH_143840 | PVX_123725 | PY03215 | PBANKA_143700 | PCHAS_143900 | 4.44828 | 5.40648 | 4.28221 | 3.04631 | 3.95223 | 3.7124  | 0.571   | 0.394355  | 5.40648 | pk | 0.4104502 | 4.282205 | pv |
| PFL1055c | PKH_143850 | PVX_123730 | PY03216 | PBANKA_143710 | PCHAS_143910 | 1.13218 | 0.66404 | 0.43474 | 5.99745 | 0.1597  | 2.94942 | 0.73949 | 0.3844514 | 2.94942 | pc | 0.3004456 | 5.997453 | py |
| PFL1090w | PKH_143920 | PVX_123765 | PY03448 | PBANKA_143760 | PCHAS_143960 | 5.8587  | 5.939   | 6.08307 | 5.75365 | 5.71035 | 5.76344 | 0.10889 | 0.0667379 | 6.08307 | pv | 0.0809754 | 5.753651 | py |
| PFL1100w | PKH_143940 | PVX_123775 | PY03449 | PBANKA_143780 | PCHAS_143980 | 3.42519 | 2.19349 | 6.10379 | 5.77644 | 4.88298 | 2.09512 | 1.47903 | 1.2347844 | 2.19349 | pk | 1.2847769 | 6.103788 | pv |
| PFL1105c | PKH_143950 | PVX_123780 | PY03450 | PBANKA_143790 | PCHAS_143990 | 5.3716  | 5.06574 | 5.53211 | 5.30359 | 0.03424 | 5.37619 | 0.24747 | 0.1077945 | 0.03424 | pb | 0.1335959 | 5.376193 | pc |
| PFL1110c | PKH_143960 | PVX_123785 | PY03451 | PBANKA_143800 | PCHAS_144000 | 5.40293 | 5.69709 | 5.13501 | 4.00448 | 5.45393 | 4.1525  | 0.54366 | 0.3727011 | 4.00448 | py | 0.4531278 | 5.453925 | pb |
| PFL1135c | PKH_144020 | PVX_123810 | PY06737 | PBANKA_143850 | PCHAS_144050 | 3.13128 | 3.17982 | 4.17888 | 4.13019 | 3.81206 | 2.8545  | 0.49259 | 0.3995951 | 2.8545  | pc | 0.4077886 | 4.178883 | pv |

|          |            |            |         |                   |                  |         |         |         |         |         |         |         |           |         |    |           |          |    |
|----------|------------|------------|---------|-------------------|------------------|---------|---------|---------|---------|---------|---------|---------|-----------|---------|----|-----------|----------|----|
| PFL1140w | PKH_144030 | PVX_123815 | PY06735 | PBANKA_143<br>860 | PCHAS_14406<br>0 | 3.4975  | 2.23889 | 3.55745 | 3.94298 | 3.55171 | 3.89542 | 0.35129 | 0.1578389 | 2.23889 | pk | 0.1972987 | 3.557449 | pv |
| PFL1150c | PKH_144050 | PVX_123825 | PY06733 | PBANKA_143<br>880 | PCHAS_14408<br>0 | 3.44205 | 3.07504 | 2.80702 | 2.48038 | 2.94469 | 2.44652 | 0.28798 | 0.2185652 | 3.44205 | pf | 0.2062005 | 3.075043 | pk |
| PFL1155w | PKH_144060 | PVX_123830 | PY03300 | PBANKA_143<br>890 | PCHAS_14409<br>0 | 3.169   | 2.22458 | 2.83074 | 1.35999 | 2.43589 | 2.68768 | 0.44449 | 0.2678542 | 1.35999 | py | 0.2718698 | 2.435893 | pb |
| PFL1160c | PKH_144070 | PVX_123835 | PY03299 | PBANKA_143<br>900 | PCHAS_14410<br>0 | 5.23012 | 5.39787 | 5.18098 | 4.89521 | 5.2317  | 5.46537 | 0.13144 | 0.0904269 | 4.89521 | py | 0.1130336 | 5.231696 | pb |
| PFL1170w | PKH_144100 | PVX_123845 | PY05398 | PBANKA_143<br>920 | PCHAS_14412<br>0 | 1.80965 | 1.96234 | 3.20301 | 5.71523 | 0.81361 | 1.88054 | 0.83176 | 0.5084187 | 5.71523 | py | 0.3687898 | 0.813608 | pb |
| PFL1175w | PKH_144110 | PVX_123850 | PY05853 | PBANKA_143<br>930 | PCHAS_14413<br>0 | 1.47377 | 1.20437 | 6.15014 | 0.18455 | 0.43025 | 0.58164 | 0.46301 | 0.3469032 | 1.47377 | pf | 0.2400974 | 1.204374 | pk |
| PFL1190c | PKH_144140 | PVX_123865 | PY02470 | PBANKA_143<br>960 | PCHAS_14416<br>0 | 5.85328 | 1.53926 | 4.36731 | 2.78757 | 4.80481 | 3.64179 | 1.17613 | 0.8457458 | 1.53926 | pk | 1.0571823 | 4.367311 | pv |
| PFL1195w | PKH_144150 | PVX_123870 | PY07238 | PBANKA_143<br>970 | PCHAS_14417<br>0 | 5.64016 | 3.79164 | 5.23351 | 4.76095 | 4.27254 | 3.16081 | 0.73494 | 0.5618987 | 3.16081 | pc | 0.4825725 | 5.640158 | pf |
| PFL1200c | PKH_144160 | PVX_123875 | PY07239 | PBANKA_143<br>980 | PCHAS_14418<br>0 | 1.35992 | 4.98263 | 1.61971 | 6.04672 | 5.56215 | 5.88039 | 0.86126 | 0.6290094 | 1.61971 | pv | 0.7446785 | 6.046721 | py |
| PFL1210w | PKH_144190 | PVX_123885 | PY07371 | PBANKA_144<br>000 | PCHAS_14420<br>0 | 2.90991 | 3.51293 | 2.65081 | 0.04447 | 4.213   | 1.88342 | 1.00952 | 0.6383394 | 0.04447 | py | 0.4721522 | 4.213    | pb |
| PFL1215c | PKH_144200 | PVX_123890 | PY05789 | PBANKA_144<br>010 | PCHAS_14421<br>0 | 1.39097 | 2.03974 | 2.6077  | 0.70946 | 0.63238 | 0.91806 | 0.62975 | 0.4177744 | 2.6077  | pv | 0.470068  | 0.709456 | py |
| PFL1220w | PKH_144210 | PVX_123895 | PY05790 | PBANKA_144<br>020 | PCHAS_14422<br>0 | 1.40364 | 0.15601 | 6.16669 | 2.08305 | 0.20441 | 1.81801 | 0.84346 | 0.636425  | 2.08305 | py | 0.7955312 | 0.204414 | pb |
| PFL1225c | PKH_144220 | PVX_123900 | PY05791 | PBANKA_144<br>030 | PCHAS_14423<br>0 | 1.27656 | 1.38252 | 2.58178 | 0.35425 | 1.24035 | 1.79249 | 0.48094 | 0.3160828 | 2.58178 | pv | 0.1645269 | 0.354252 | py |
| PFL1230w | PKH_144230 | PVX_123905 | PY05849 | PBANKA_144<br>040 | PCHAS_14424<br>0 | 1.48119 | 1.48024 | 4.10494 | 1.28992 | 0.83731 | 1.28742 | 0.60862 | 0.1673425 | 4.10494 | pv | 0.2091781 | 1.289923 | py |
| PFL1235c | PKH_144240 | PVX_123910 | PY05850 | PBANKA_144<br>050 | PCHAS_14425<br>0 | 1.93539 | 2.57562 | 3.21856 | 2.31448 | 3.44683 | 1.38619 | 0.60082 | 0.4831037 | 1.38619 | pc | 0.3860765 | 3.446829 | pb |
| PFL1240c | PKH_144250 | PVX_123915 | PY05852 | PBANKA_144<br>060 | PCHAS_14426<br>0 | 2.09447 | 3.59117 | 3.28974 | 1.92025 | 1.57476 | 1.49282 | 0.66459 | 0.4633245 | 3.59117 | pk | 0.2367842 | 3.289737 | pv |
| PFL1245w | PKH_144260 | PVX_123920 | PY01879 | PBANKA_144<br>070 | PCHAS_14427<br>0 | 3.216   | 6.12297 | 3.36492 | 4.96138 | 2.3749  | 2.87329 | 0.99752 | 0.6156244 | 6.12297 | pk | 0.7322994 | 3.364921 | pv |
| PFL1255c | PKH_144280 | PVX_123930 | PY01881 | PBANKA_144<br>090 | PCHAS_14429<br>0 | 2.90142 | 2.91907 | 3.46656 | 5.19377 | 3.37038 | 2.32143 | 0.64813 | 0.3228186 | 5.19377 | py | 0.2906956 | 3.370376 | pb |
| PFL1335w | PKH_144440 | PVX_124010 | PY00535 | PBANKA_144<br>230 | PCHAS_14444<br>0 | 4.76358 | 5.63836 | 5.06088 | 5.35216 | 4.908   | 5.14354 | 0.2336  | 0.1648218 | 5.63836 | pk | 0.2060273 | 5.060884 | pv |
| PFL1345c | PKH_144460 | PVX_124020 | PY03999 | PBANKA_144<br>250 | PCHAS_14447<br>0 | 1.55676 | 0.57784 | 0.70694 | 2.34758 | 0.79298 | 1.264   | 0.5151  | 0.3071954 | 2.34758 | py | 0.3839942 | 0.792976 | pb |
| PFL1350w | PKH_144470 | PVX_124025 | PY04000 | PBANKA_144<br>260 | PCHAS_14448<br>0 | 1.97453 | 3.8418  | 3.32237 | 4.18943 | 2.39509 | 2.10844 | 0.81259 | 0.6162385 | 4.18943 | py | 0.7702981 | 2.395089 | pb |
| PFL1355w | PKH_144480 | PVX_124030 | PY04001 | PBANKA_144<br>270 | PCHAS_14449<br>0 | 3.44989 | 3.23475 | 3.40696 | 3.31498 | 2.89765 | 3.77988 | 0.19822 | 0.136007  | 2.89765 | pb | 0.0767793 | 3.77988  | pc |

|          |            |            |         |                   |                  |         |         |         |         |         |         |         |           |         |    |           |          |    |
|----------|------------|------------|---------|-------------------|------------------|---------|---------|---------|---------|---------|---------|---------|-----------|---------|----|-----------|----------|----|
| PFL1365w | PKH_144500 | PVX_124040 | PY04004 | PBANKA_144<br>290 | PCHAS_14451<br>0 | 4.13675 | 2.35202 | 2.5458  | 5.66366 | 1.95109 | 1.11078 | 1.0987  | 0.7241339 | 5.66366 | py | 0.804937  | 1.951093 | pb |
| PFL1370w | PKH_144510 | PVX_124045 | PY04005 | PBANKA_144<br>300 | PCHAS_14452<br>0 | 4.52714 | 4.37069 | 5.10838 | 5.18823 | 5.34985 | 5.04052 | 0.28469 | 0.1940853 | 4.37069 | pk | 0.2426066 | 5.108381 | pv |
| PFL1375w | PKH_144520 | PVX_124050 | PY05683 | PBANKA_144<br>310 | PCHAS_14453<br>0 | 1.69935 | 2.60282 | 1.57567 | 2.65573 | 5.70573 | 4.58275 | 1.17773 | 0.7926924 | 5.70573 | pb | 0.4958829 | 4.582752 | pc |
| PFL1380w | PKH_144530 | PVX_124055 | PY02882 | PBANKA_144<br>320 | PCHAS_14454<br>0 | 4.61024 | 0.24002 | 3.13785 | 2.32889 | 3.16117 | 3.79174 | 0.97607 | 0.5870482 | 0.24002 | pk | 0.7279788 | 3.137846 | pv |
| PFL1385c | PKH_144540 | PVX_124060 | PY02883 | PBANKA_144<br>330 | PCHAS_14455<br>0 | 5.39431 | 5.73444 | 5.31953 | 3.55314 | 4.86416 | 4.83583 | 0.53252 | 0.2857502 | 3.55314 | py | 0.2433457 | 4.864164 | pb |
| PFL1390w | PKH_144550 | PVX_124065 | PY02884 | PBANKA_144<br>340 | PCHAS_14456<br>0 | 4.49563 | 5.99086 | 3.78069 | 3.6479  | 3.33283 | 3.319   | 0.66124 | 0.3248963 | 5.99086 | pk | 0.3729236 | 3.780689 | pv |
| PFL1395c | PKH_144560 | PVX_124070 | PY01983 | PBANKA_144<br>350 | PCHAS_14457<br>0 | 4.2269  | 4.12246 | 4.83385 | 2.65439 | 3.80769 | 5.65956 | 0.68929 | 0.5126523 | 2.65439 | py | 0.5360136 | 3.807688 | pb |
| PFL1420w | PKH_144610 | PVX_124095 | PY05452 | PBANKA_144<br>400 | PCHAS_14462<br>0 | 3.08086 | 3.03954 | 2.93828 | 5.64951 | 3.31623 | 2.74635 | 0.55374 | 0.1424934 | 5.64951 | py | 0.1089439 | 3.316229 | pb |
| PFL1425w | PKH_144620 | PVX_124100 | PY07337 | PBANKA_144<br>410 | PCHAS_14463<br>0 | 2.69243 | 2.68725 | 2.64275 | 2.60807 | 2.67355 | 2.74593 | 0.03354 | 0.0257711 | 2.74593 | pc | 0.015844  | 2.608073 | py |
| PFL1430c | PKH_144630 | PVX_124105 | PY07335 | PBANKA_144<br>420 | PCHAS_14464<br>0 | 4.49575 | 0.51009 | 2.72678 | 0.08828 | 1.95089 | 3.02187 | 1.28252 | 1.0300566 | 4.49575 | pf | 0.9273705 | 0.510086 | pk |
| PFL1435c | PKH_144660 | PVX_124120 | PY02134 | PBANKA_144<br>450 | PCHAS_14467<br>0 | 5.93155 | 6.13151 | 5.56918 | 2.66403 | 5.79146 | 6.00117 | 0.63128 | 0.1544075 | 2.66403 | py | 0.1579865 | 5.791456 | pb |
| PFL1440c | PKH_144680 | PVX_124130 | PY02515 | PBANKA_144<br>460 | PCHAS_14468<br>0 | 4.73365 | 4.11878 | 4.14164 | 5.20764 | 3.36257 | 2.03959 | 0.76033 | 0.491987  | 2.03959 | pc | 0.3484847 | 5.207641 | py |
| PFL1450c | PKH_144700 | PVX_124145 | PY07066 | PBANKA_144<br>480 | PCHAS_14470<br>0 | 0.37704 | 3.23219 | 0.42498 | 0.16279 | 0.55288 | 5.80373 | 0.69161 | 0.2589056 | 3.23219 | pk | 0.3116463 | 0.424983 | pv |
| PFL1465c | PKH_144730 | PVX_124160 | PY03772 | PBANKA_144<br>510 | PCHAS_14473<br>0 | 3.94336 | 0.25927 | 2.93241 | 5.92835 | 3.15602 | 3.61678 | 1.11816 | 0.7566566 | 0.25927 | pk | 0.774727  | 2.932408 | pv |
| PFL1470c | PKH_144740 | PVX_124165 | PY03773 | PBANKA_144<br>520 | PCHAS_14474<br>0 | 1.69973 | 1.4466  | 2.12237 | 1.75486 | 1.39654 | 2.17176 | 0.25102 | 0.2068178 | 2.17176 | pc | 0.1528632 | 2.122366 | pv |
| PFL1475w | PKH_144750 | PVX_124170 | PY03774 | PBANKA_144<br>530 | PCHAS_14475<br>0 | 2.73128 | 2.37757 | 2.69145 | 1.67395 | 3.55924 | 1.56587 | 0.56076 | 0.4365807 | 3.55924 | pb | 0.3428024 | 1.565871 | pc |
| PFL1480w | PKH_144760 | PVX_124175 | PY03775 | PBANKA_144<br>540 | PCHAS_14476<br>0 | 0.462   | 0.13413 | 4.48126 | 3.95393 | 1.13793 | 3.3445  | 1.46732 | 1.1462214 | 3.3445  | pc | 1.181825  | 1.137933 | pb |
| PFL1485w | PKH_144770 | PVX_124180 | PY01573 | PBANKA_144<br>550 | PCHAS_14477<br>0 | 1.8712  | 2.60763 | 2.15431 | 2.49174 | 0.92694 | 2.53551 | 0.44707 | 0.2235268 | 0.92694 | pb | 0.2684667 | 2.535508 | pc |
| PFL1490w | PKH_144780 | PVX_124185 | PY01572 | PBANKA_144<br>560 | PCHAS_14478<br>0 | 1.17245 | 1.73129 | 1.75856 | 1.64959 | 0.44691 | 1.14653 | 0.39559 | 0.2341741 | 0.44691 | pb | 0.1669528 | 1.146527 | pc |
| PFL1495w | PKH_144790 | PVX_124190 | PY05253 | PBANKA_144<br>570 | PCHAS_14479<br>0 | 5.07871 | 0.00488 | 6.22212 | 1.14034 | 2.67358 | 2.42398 | 1.24976 | 1.0307514 | 5.07871 | pf | 1.004574  | 0.004878 | pk |
| PFL1505c | PKH_144810 | PVX_124200 | PY05255 | PBANKA_144<br>590 | PCHAS_14481<br>0 | 6.1673  | 0.05879 | 1.10078 | 4.35412 | 5.41451 | 5.92484 | 0.69996 | 0.4773193 | 4.35412 | py | 0.4084528 | 5.41451  | pb |
| PFL1530w | PKH_144890 | PVX_100535 | PY06041 | PBANKA_144<br>650 | PCHAS_14487<br>0 | 2.7848  | 1.65392 | 2.19336 | 2.71772 | 2.74064 | 2.63167 | 0.29404 | 0.140082  | 1.65392 | pk | 0.0440129 | 2.193358 | pv |

|          |            |            |         |                   |                  |         |         |         |         |         |         |         |           |         |    |           |          |    |
|----------|------------|------------|---------|-------------------|------------------|---------|---------|---------|---------|---------|---------|---------|-----------|---------|----|-----------|----------|----|
| PFL1540c | PKH_144910 | PVX_100545 | PY04756 | PBANKA_144<br>670 | PCHAS_14489<br>0 | 3.7714  | 3.14504 | 3.43349 | 2.6522  | 3.20557 | 1.65522 | 0.493   | 0.2815299 | 1.65522 | pc | 0.2104554 | 3.771402 | pf |
| PFL1545c | PKH_144920 | PVX_100550 | PY04757 | PBANKA_144<br>680 | PCHAS_14490<br>0 | 3.59323 | 2.84975 | 2.73632 | 2.59586 | 2.87529 | 2.61465 | 0.22857 | 0.1029046 | 3.59323 | pf | 0.1002727 | 2.849751 | pk |
| PFL1550w | PKH_144930 | PVX_100555 | PY04793 | PBANKA_144<br>690 | PCHAS_14491<br>0 | 3.51037 | 3.08915 | 4.52823 | 3.2257  | 3.83437 | 3.91361 | 0.4085  | 0.2866253 | 4.52823 | pv | 0.2871143 | 3.225704 | py |
| PFL1565c | PKH_144960 | PVX_100570 | PY04962 | PBANKA_144<br>720 | PCHAS_14494<br>0 | 5.71538 | 5.58908 | 5.4861  | 6.07752 | 5.65425 | 5.54736 | 0.13744 | 0.0672368 | 6.07752 | py | 0.0677526 | 5.654252 | pb |
| PFL1580w | PKH_144990 | PVX_100585 | PY04704 | PBANKA_144<br>740 | PCHAS_14496<br>0 | 5.60255 | 0.18497 | 4.98953 | 5.0018  | 4.7331  | 5.29573 | 0.44034 | 0.2351299 | 0.18497 | pk | 0.2908466 | 4.989534 | pv |
| PFL1585c | PKH_145010 | PVX_100595 | PY04705 | PBANKA_144<br>760 | PCHAS_14499<br>0 | 2.39293 | 2.42924 | 1.91773 | 0.87766 | 3.20921 | 2.1539  | 0.51368 | 0.3133644 | 0.87766 | py | 0.1876376 | 3.209206 | pb |
| PFL1595w | PKH_145030 | PVX_100610 | PY04707 | PBANKA_144<br>780 | PCHAS_14501<br>0 | 3.94132 | 5.47235 | 2.99574 | 2.12771 | 3.44661 | 1.33509 | 1.06696 | 0.7850252 | 5.47235 | pk | 0.9812815 | 2.995737 | pv |
| PFL1605w | PKH_145050 | PVX_100625 | PY04935 | PBANKA_144<br>800 | PCHAS_14503<br>0 | 3.35554 | 2.93361 | 2.76672 | 2.09044 | 2.85899 | 2.23891 | 0.34201 | 0.2926498 | 3.35554 | pf | 0.3240882 | 2.933612 | pk |
| PFL1610c | PKH_145060 | PVX_100630 | PY04934 | PBANKA_144<br>810 | PCHAS_14504<br>0 | 1.73874 | 1.36045 | 1.45519 | 1.73723 | 2.65268 | 2.7413  | 0.42997 | 0.3151557 | 2.7413  | pc | 0.1650821 | 2.652679 | pb |
| PFL1620w | PKH_145070 | PVX_100635 | PY03832 | PBANKA_144<br>820 | PCHAS_14505<br>0 | 3.3674  | 4.76823 | 3.56635 | 2.46176 | 2.6949  | 2.14504 | 0.73338 | 0.4653908 | 4.76823 | pk | 0.3638758 | 3.566355 | pv |
| PFL1630c | PKH_145090 | PVX_100645 | PY07835 | PBANKA_144<br>840 | PCHAS_14507<br>0 | 4.08339 | 4.24116 | 3.44966 | 4.18584 | 3.69122 | 4.391   | 0.26562 | 0.1715091 | 3.44966 | pv | 0.2143864 | 4.185835 | py |
| PFL1635w | PKH_145100 | PVX_100650 | PY02388 | PBANKA_144<br>850 | PCHAS_14508<br>0 | 2.83618 | 1.15706 | 3.36778 | 0.80641 | 5.06162 | 0.97681 | 1.13323 | 0.88415   | 5.06162 | pb | 1.060124  | 0.976807 | pc |
| PFL1665c | PKH_145160 | PVX_100675 | PY06202 | PBANKA_144<br>910 | PCHAS_14514<br>0 | 1.70096 | 2.91043 | 2.71776 | 5.7021  | 2.9598  | 3.98806 | 0.8868  | 0.5058273 | 5.7021  | py | 0.6199436 | 2.959796 | pb |
| PFL1675c | PKH_145180 | PVX_100685 | PY03515 | PBANKA_144<br>930 | PCHAS_14516<br>0 | 1.62961 | 0.46679 | 0.91212 | 2.52762 | 0.16075 | 0.28638 | 0.69257 | 0.4189214 | 2.52762 | py | 0.4471422 | 0.160748 | pb |
| PFL1680w | PKH_145190 | PVX_100690 | PY03514 | PBANKA_144<br>940 | PCHAS_14517<br>0 | 2.38113 | 2.40267 | 2.44529 | 2.02866 | 2.17968 | 4.55636 | 0.46914 | 0.1279242 | 4.55636 | pc | 0.071786  | 2.028655 | py |
| PFL1690w | PKH_145210 | PVX_100700 | PY00508 | PBANKA_144<br>960 | PCHAS_14519<br>0 | 3.17278 | 3.63797 | 5.91255 | 5.52616 | 6.13598 | 1.37705 | 1.22864 | 0.9264184 | 3.17278 | pf | 0.5893766 | 3.637966 | pk |
| PFL1705w | PKH_145380 | PVX_100715 | PY00512 | PBANKA_144<br>990 | PCHAS_14522<br>0 | 1.62262 | 1.2349  | 2.17857 | 1.06792 | 1.39487 | 1.37859 | 0.25244 | 0.1429342 | 2.17857 | pv | 0.100999  | 1.06792  | py |
| PFL1710c | PKH_145390 | PVX_100720 | PY00511 | PBANKA_145<br>000 | PCHAS_14523<br>0 | 2.71374 | 1.95853 | 2.35582 | 5.33526 | 5.69837 | 2.54668 | 1.14435 | 0.7469269 | 5.69837 | pb | 0.9336586 | 2.546678 | pc |
| PFL1720w | PKH_145420 | PVX_100730 | PY00962 | PBANKA_145<br>020 | PCHAS_14525<br>0 | 4.35751 | 4.36833 | 3.96851 | 4.46149 | 4.7218  | 4.26524 | 0.16006 | 0.1121079 | 3.96851 | pv | 0.1168434 | 4.461493 | py |
| PFL1725w | PKH_145430 | PVX_100735 | PY00963 | PBANKA_145<br>030 | PCHAS_14526<br>0 | 4.00806 | 2.8767  | 3.50868 | 4.86087 | 3.82928 | 4.34502 | 0.49988 | 0.3735844 | 2.8767  | pk | 0.3421362 | 3.508684 | pv |
| PFL1730c | PKH_145440 | PVX_100740 | PY00965 | PBANKA_145<br>040 | PCHAS_14527<br>0 | 2.46119 | 0.50833 | 6.23815 | 5.45703 | 5.53078 | 0.87101 | 0.91069 | 0.5915807 | 2.46119 | pf | 0.6011344 | 0.508327 | pk |
| PFL1735c | PKH_145450 | PVX_100745 | PY00967 | PBANKA_145<br>050 | PCHAS_14528<br>0 | 2.44834 | 2.18033 | 2.54395 | 2.33777 | 1.68871 | 0.11196 | 0.55818 | 0.2246487 | 0.11196 | pc | 0.1185454 | 1.68871  | pb |

|          |            |            |         |               |              |         |         |         |         |         |         |         |           |         |    |           |          |    |
|----------|------------|------------|---------|---------------|--------------|---------|---------|---------|---------|---------|---------|---------|-----------|---------|----|-----------|----------|----|
| PFL1740w | PKH_145460 | PVX_100750 | PY04228 | PBANKA_145060 | PCHAS_145290 | 3.95113 | 3.80535 | 3.99256 | 2.05468 | 3.59767 | 0.88384 | 0.86881 | 0.4582695 | 0.88384 | pc | 0.1351688 | 2.054678 | py |
| PFL1745c | PKH_145470 | PVX_100755 | PY03171 | PBANKA_145070 | PCHAS_145300 | 2.63366 | 0.44923 | 0.1231  | 2.55776 | 2.06256 | 3.00712 | 0.92727 | 0.6257956 | 0.1231  | pv | 0.7822445 | 2.557757 | py |
| PFL1760w | PKH_145500 | PVX_100770 | PY06123 | PBANKA_145100 | PCHAS_145330 | 0.68599 | 0.54961 | 3.7998  | 5.9706  | 4.102   | 4.36013 | 1.25177 | 0.9803181 | 0.68599 | pf | 0.6072321 | 0.549607 | pk |
| PFL1775c | PKH_145530 | PVX_100785 | PY05542 | PBANKA_145130 | PCHAS_145360 | 3.22342 | 3.31889 | 3.29707 | 1.67855 | 2.89703 | 2.37905 | 0.48079 | 0.267976  | 1.67855 | py | 0.2533724 | 2.897031 | pb |
| PFL1780w | PKH_145540 | PVX_100790 | PY05541 | PBANKA_145140 | PCHAS_145370 | 4.85741 | 5.76287 | 2.66141 | 6.10247 | 2.85374 | 0.04887 | 1.28181 | 0.9446748 | 2.66141 | pv | 1.0959443 | 6.102465 | py |
| PFL1785c | PKH_145550 | PVX_100795 | PY05540 | PBANKA_145150 | PCHAS_145380 | 5.59278 | 4.35336 | 5.91396 | 5.6191  | 5.23313 | 5.25467 | 0.38078 | 0.2090512 | 4.35336 | pk | 0.1810183 | 5.913962 | pv |
| PFL1790w | PKH_145560 | PVX_100800 | PY05539 | PBANKA_145160 | PCHAS_145390 | 3.08179 | 5.40802 | 3.38962 | 3.84878 | 3.53638 | 3.61833 | 0.47789 | 0.1991396 | 5.40802 | pk | 0.2122337 | 3.389619 | pv |
| PFL1795c | PKH_145570 | PVX_100805 | PY05538 | PBANKA_145170 | PCHAS_145400 | 2.18799 | 1.14545 | 2.22351 | 1.61748 | 2.25722 | 1.84666 | 0.34319 | 0.2033185 | 1.14545 | pk | 0.2452669 | 2.223511 | pv |
| PFL1820w | PKH_145620 | PVX_100830 | PY03590 | PBANKA_145220 | PCHAS_145450 | 1.44488 | 1.81388 | 2.03099 | 1.38645 | 1.22216 | 0.46918 | 0.36866 | 0.2472511 | 0.46918 | pc | 0.1625363 | 2.030987 | pv |
| PFL1825w | PKH_145640 | PVX_100835 | PY03591 | PBANKA_145230 | PCHAS_145460 | 4.20237 | 3.60919 | 2.76278 | 6.0342  | 3.53863 | 1.81691 | 0.95457 | 0.6463734 | 6.0342  | py | 0.8079668 | 3.538625 | pb |
| PFL1830w | PKH_145650 | PVX_100840 | PY06022 | PBANKA_145240 | PCHAS_145470 | 2.15263 | 2.91682 | 2.81493 | 5.92384 | 4.33958 | 2.4648  | 0.95798 | 0.5277928 | 5.92384 | py | 0.2785799 | 4.339579 | pb |
| PFL1835w | PKH_145660 | PVX_100845 | PY04830 | PBANKA_145250 | PCHAS_145480 | 0.16424 | 2.89235 | 1.52469 | 1.83454 | 2.67795 | 1.95912 | 0.66766 | 0.4422152 | 0.16424 | pf | 0.3194603 | 2.892351 | pk |
| PFL1845c | PKH_145680 | PVX_100855 | PY04829 | PBANKA_145260 | PCHAS_145490 | 2.83291 | 2.71694 | 1.41436 | 2.65892 | 3.20551 | 1.8938  | 0.46471 | 0.2971412 | 1.41436 | pv | 0.3569194 | 2.658915 | py |
| PFL1855w | PKH_145700 | PVX_100865 | PY04825 | PBANKA_145280 | PCHAS_145510 | 1.78195 | 0.92061 | 1.97034 | 0.77806 | 0.64455 | 0.74163 | 0.41811 | 0.2632761 | 1.97034 | pv | 0.3290952 | 0.778063 | py |
| PFL1915w | PKH_145750 | PVX_100925 | PY04024 | PBANKA_145400 | PCHAS_145630 | 3.85331 | 4.05828 | 2.65864 | 2.68315 | 4.87175 | 3.27333 | 0.6947  | 0.5139606 | 4.87175 | pb | 0.6424508 | 3.27333  | pc |
| PFL1935c | PKH_145790 | PVX_100945 | PY02218 | PBANKA_145430 | PCHAS_145660 | 1.73227 | 1.15428 | 3.15509 | 1.70281 | 2.76267 | 1.78353 | 0.51866 | 0.3378231 | 3.15509 | pv | 0.4149135 | 1.702806 | py |
| PFL1940w | PKH_145800 | PVX_100950 | PY02220 | PBANKA_145440 | PCHAS_145670 | 0.8611  | 3.38706 | 3.06414 | 0.79616 | 3.14628 | 2.69463 | 0.87426 | 0.595522  | 0.79616 | py | 0.7238684 | 3.14628  | pb |
| PFL1975c | PKH_145810 | PVX_100955 | PY02221 | PBANKA_145450 | PCHAS_145680 | 0.92199 | 3.33662 | 2.84009 | 4.21057 | 2.69658 | 0.82722 | 0.99025 | 0.8855005 | 4.21057 | py | 1.1068756 | 2.696582 | pb |
| PFL1980c | PKH_145820 | PVX_100960 | PY02222 | PBANKA_145460 | PCHAS_145690 | 2.879   | 4.88621 | 5.13811 | 3.05838 | 5.08539 | 5.51539 | 0.81922 | 0.5417811 | 2.879   | pf | 0.62743   | 4.886209 | pk |
| PFL1985c | PKH_145830 | PVX_100965 | PY03465 | PBANKA_145470 | PCHAS_145700 | 3.70426 | 3.19762 | 3.0143  | 2.26509 | 2.5583  | 1.97276 | 0.52    | 0.3948137 | 3.70426 | pf | 0.3336871 | 3.197619 | pk |
| PFL1995c | PKH_145850 | PVX_100975 | PY01495 | PBANKA_145490 | PCHAS_145720 | 2.91966 | 4.16616 | 6.13996 | 4.92248 | 4.23352 | 5.40234 | 0.85757 | 0.628524  | 2.91966 | pf | 0.5965762 | 4.166164 | pk |
| PFL2000w | PKH_145860 | PVX_100980 | PY01494 | PBANKA_145500 | PCHAS_145730 | 3.70499 | 2.91253 | 2.07937 | 5.71116 | 0.9951  | 4.98485 | 1.40233 | 1.1230741 | 5.71116 | py | 0.9244841 | 0.995096 | pb |



|          |            |            |         |               |              |         |         |         |         |         |         |         |           |         |    |           |          |    |
|----------|------------|------------|---------|---------------|--------------|---------|---------|---------|---------|---------|---------|---------|-----------|---------|----|-----------|----------|----|
| PFL2010c | PKH_145900 | PVX_100990 | PY01492 | PBANKA_145520 | PCHAS_145750 | 1.60453 | 1.01562 | 2.27305 | 1.95892 | 0.6557  | 1.68102 | 0.43952 | 0.3223608 | 0.6557  | pb | 0.402951  | 1.681024 | pc |
| PFL2015w | PKH_145910 | PVX_100995 | PY01491 | PBANKA_145530 | PCHAS_145760 | 0.59086 | 2.49851 | 3.71332 | 0.41136 | 0.7393  | 6.2375  | 0.9991  | 0.574427  | 3.71332 | pv | 0.6731597 | 0.411359 | py |
| PFL2020c | PKH_145920 | PVX_101000 | PY01490 | PBANKA_145540 | PCHAS_145770 | 3.8395  | 0.86647 | 1.04976 | 1.3253  | 5.44292 | 5.81932 | 1.10871 | 0.7358392 | 3.8395  | pf | 0.919799  | 0.866469 | pk |
| PFL2030w | PKH_145930 | PVX_101010 | PY01488 | PBANKA_145560 | PCHAS_145790 | 2.80017 | 4.08323 | 2.19466 | 2.75289 | 3.04535 | 2.74059 | 0.37344 | 0.1820557 | 4.08323 | pk | 0.0880108 | 2.194656 | pv |
| PFL2035c | PKH_145940 | PVX_101015 | PY01487 | PBANKA_145570 | PCHAS_145800 | 3.82844 | 2.51669 | 1.84056 | 5.56276 | 2.83992 | 1.71207 | 1.02696 | 0.623143  | 5.56276 | py | 0.698123  | 2.839916 | pb |
| PFL2045w | PKH_145960 | PVX_101025 | PY04104 | PBANKA_145590 | PCHAS_145820 | 4.10458 | 4.631   | 3.54969 | 2.67848 | 3.70195 | 3.04748 | 0.52698 | 0.4161145 | 4.631   | pk | 0.5201432 | 3.549695 | pv |
| PFL2060c | PKH_145990 | PVX_101040 | PY04102 | PBANKA_145620 | PCHAS_145850 | 2.90988 | 0.50925 | 2.89684 | 6.06392 | 2.35837 | 3.85158 | 1.16832 | 0.7787669 | 6.06392 | py | 0.8388408 | 2.358372 | pb |
| PFL2070w | PKH_146010 | PVX_101050 | PY03571 | PBANKA_145640 | PCHAS_145870 | 4.70925 | 2.62275 | 4.39266 | 2.12052 | 3.65338 | 1.7952  | 1.03614 | 0.8260635 | 4.70925 | pf | 1.0325794 | 2.62275  | pk |
| PFL2075c | PKH_146020 | PVX_101055 | PY03572 | PBANKA_145650 | PCHAS_145880 | 2.28972 | 3.83925 | 3.2607  | 2.20655 | 0.32077 | 4.31917 | 1.10035 | 0.7324312 | 0.32077 | pb | 0.6509216 | 4.319174 | pc |
| PFL2090c | PKH_146060 | PVX_101075 | PY01275 | PBANKA_145680 | PCHAS_145910 | 4.92706 | 5.40676 | 5.07054 | 4.2261  | 4.98925 | 4.86758 | 0.24097 | 0.1365325 | 4.2261  | py | 0.1706656 | 4.989247 | pb |
| PFL2095w | PKH_146070 | PVX_101080 | PY01209 | PBANKA_145690 | PCHAS_145920 | 6.19768 | 0.47676 | 5.70131 | 4.05698 | 5.47519 | 5.6613  | 0.57758 | 0.3642279 | 4.05698 | py | 0.3987549 | 5.475189 | pb |
| PFL2100w | PKH_146080 | PVX_101085 | PY01211 | PBANKA_145700 | PCHAS_145930 | 6.02245 | 5.6999  | 5.21085 | 5.26188 | 5.69076 | 5.63195 | 0.21807 | 0.1835847 | 6.02245 | pf | 0.2124933 | 5.699897 | pk |
| PFL2105c | PKH_146090 | PVX_101090 | PY01212 | PBANKA_145710 | PCHAS_145940 | 1.355   | 5.36878 | 2.06034 | 1.02112 | 5.22448 | 2.81958 | 1.19782 | 0.9546395 | 5.22448 | pb | 0.8271553 | 2.81958  | pc |
| PFL2110c | PKH_146100 | PVX_101095 | PY01213 | PBANKA_145720 | PCHAS_145950 | 5.40907 | 5.22624 | 5.43166 | 4.79774 | 5.44139 | 5.52805 | 0.16134 | 0.0668255 | 4.79774 | py | 0.0811    | 5.441391 | pb |
| PFL2115c | PKH_146110 | PVX_101100 | PY01214 | PBANKA_145730 | PCHAS_145960 | 4.05906 | 3.52053 | 2.59137 | 2.67118 | 2.35208 | 1.78798 | 0.58656 | 0.4103296 | 4.05906 | pf | 0.2806214 | 3.520528 | pk |
| PFL2120w | PKH_146120 | PVX_101105 | PY01215 | PBANKA_145740 | PCHAS_145970 | 5.65547 | 2.62275 | 2.22046 | 1.54822 | 2.2465  | 1.96412 | 0.70085 | 0.2713793 | 5.65547 | pf | 0.2386526 | 2.622745 | pk |
| PFL2125c | PKH_146130 | PVX_101110 | PY06009 | PBANKA_145750 | PCHAS_145980 | 1.87858 | 2.7025  | 3.04713 | 0.87205 | 2.19435 | 2.03913 | 0.5257  | 0.3663842 | 0.87205 | py | 0.4579803 | 2.194348 | pb |
| PFL2140c | PKH_146180 | PVX_101125 | PY03828 | PBANKA_145780 | PCHAS_146010 | 5.57085 | 6.10784 | 5.09667 | 4.02569 | 4.58227 | 4.79115 | 0.56271 | 0.4119098 | 6.10784 | pk | 0.4385093 | 5.096666 | pv |
| PFL2145w | PKH_146190 | PVX_101130 | PY00985 | PBANKA_145790 | PCHAS_146020 | 0.79399 | 1.86015 | 0.56712 | 1.45448 | 4.33085 | 4.47019 | 1.2178  | 0.9121006 | 4.33085 | pb | 0.4883804 | 4.470189 | pc |
| PFL2150c | PKH_146200 | PVX_101135 | PY00986 | PBANKA_145800 | PCHAS_146030 | 1.96358 | 2.80501 | 2.62067 | 2.6182  | 2.29629 | 2.1219  | 0.27702 | 0.2014985 | 1.96358 | pf | 0.2051704 | 2.805015 | pk |
| PFL2165w | PKH_146250 | PVX_101150 | PY03174 | PBANKA_145830 | PCHAS_146060 | 4.95987 | 4.60497 | 5.0073  | 3.31112 | 4.87474 | 4.76231 | 0.36058 | 0.1199781 | 3.31112 | py | 0.1499726 | 4.874736 | pb |
| PFL2180w | PKH_146280 | PVX_101165 | PY04814 | PBANKA_145860 | PCHAS_146090 | 2.47485 | 3.49492 | 2.30284 | 3.85343 | 2.60419 | 3.02411 | 0.49843 | 0.3482664 | 3.85343 | py | 0.4353331 | 2.60419  | pb |

|          |            |            |         |               |              |         |         |         |         |         |         |         |           |         |    |           |          |    |
|----------|------------|------------|---------|---------------|--------------|---------|---------|---------|---------|---------|---------|---------|-----------|---------|----|-----------|----------|----|
| PFL2190c | PKH_146300 | PVX_101175 | PY06543 | PBANKA_145880 | PCHAS_146110 | 0.99646 | 0.21954 | 6.14265 | 2.20473 | 4.67456 | 1.27131 | 1.00035 | 0.6794071 | 4.67456 | pb | 0.7805447 | 1.271312 | pc |
| PFL2195w | PKH_146310 | PVX_101180 | PY07827 | PBANKA_145890 | PCHAS_146120 | 0.53237 | 0.09925 | 1.07966 | 5.90398 | 5.06596 | 0.61498 | 0.6207  | 0.3949199 | 5.06596 | pb | 0.4729966 | 0.61498  | pc |
| PFL2200w | PKH_146320 | PVX_101185 | PY05461 | PBANKA_145900 | PCHAS_146130 | 2.89877 | 2.08862 | 2.08375 | 1.1532  | 1.2986  | 1.20999 | 0.56823 | 0.3618365 | 2.89877 | pf | 0.2547912 | 2.088618 | pk |
| PFL2215w | PKH_146350 | PVX_101200 | PY02240 | PBANKA_145930 | PCHAS_146160 | 5.24012 | 5.60761 | 5.45855 | 4.72071 | 4.78978 | 4.4733  | 0.38708 | 0.3111334 | 4.4733  | pc | 0.2970455 | 5.607606 | pk |
| PFL2230c | PKH_146390 | PVX_101220 | PY00407 | PBANKA_145960 | PCHAS_146190 | 2.05092 | 2.49549 | 2.34715 | 5.15258 | 2.12726 | 1.65927 | 0.69296 | 0.2264892 | 5.15258 | py | 0.2831115 | 2.127258 | pb |
| PFL2235w | PKH_146400 | PVX_101225 | PY00406 | PBANKA_145970 | PCHAS_146200 | 1.76283 | 2.65527 | 1.71656 | 0.03881 | 2.28845 | 2.3746  | 0.63335 | 0.3100958 | 0.03881 | py | 0.3876198 | 2.288452 | pb |
| PFL2240w | PKH_146410 | PVX_101230 | PY00405 | PBANKA_145980 | PCHAS_146210 | 3.42261 | 2.23664 | 2.41035 | 2.90923 | 3.14708 | 1.52854 | 0.55057 | 0.384541  | 1.52854 | pc | 0.3523308 | 3.422612 | pf |
| PFL2245w | PKH_146420 | PVX_101235 | PY00404 | PBANKA_145990 | PCHAS_146220 | 3.74056 | 0.01734 | 4.47752 | 5.57271 | 3.70812 | 5.0574  | 0.83407 | 0.6362859 | 0.01734 | pk | 0.7953574 | 4.477519 | pv |
| PFL2275c | PKH_146480 | PVX_101260 | PY02360 | PBANKA_146040 | PCHAS_146270 | 3.01884 | 2.25507 | 2.32476 | 2.49483 | 3.20707 | 2.65986 | 0.30185 | 0.2197749 | 3.20707 | pb | 0.2334606 | 2.65986  | pc |
| PFL2295w | PKH_146520 | PVX_101285 | PY01569 | PBANKA_146080 | PCHAS_146310 | 1.55486 | 1.68241 | 2.15954 | 1.23369 | 0.75566 | 0.52543 | 0.48034 | 0.391237  | 2.15954 | pv | 0.4890462 | 1.233693 | py |
| PFL2300w | PKH_146530 | PVX_101290 | PY01570 | PBANKA_146090 | PCHAS_146320 | 4.72672 | 5.71804 | 3.84205 | 5.64771 | 5.12174 | 3.97972 | 0.6565  | 0.5318585 | 3.84205 | pv | 0.5333314 | 5.647706 | py |
| PFL2305w | PKH_146540 | PVX_101295 | PY01571 | PBANKA_146100 | PCHAS_146330 | 2.30968 | 0.75339 | 5.63545 | 2.16304 | 2.02742 | 1.16188 | 0.8721  | 0.5114901 | 5.63545 | pv | 0.6054585 | 2.163037 | py |
| PFL2310w | PKH_146550 | PVX_101300 | PY03562 | PBANKA_146110 | PCHAS_146340 | 1.27939 | 0.9433  | 5.85205 | 4.75471 | 0.15044 | 1.85409 | 0.98099 | 0.6828339 | 4.75471 | py | 0.6553295 | 0.150444 | pb |
| PFL2315c | PKH_146560 | PVX_101305 | PY03563 | PBANKA_146120 | PCHAS_146350 | 4.21787 | 0.50161 | 1.64773 | 5.78034 | 3.07538 | 3.56239 | 1.38931 | 1.0550216 | 0.50161 | pk | 0.8401109 | 1.647726 | pv |
| PFL2320w | PKH_146570 | PVX_101310 | PY00380 | PBANKA_146130 | PCHAS_146360 | 1.11576 | 2.63028 | 0.62996 | 1.25294 | 0.43819 | 4.47894 | 0.95585 | 0.5630141 | 4.47894 | pc | 0.3251384 | 2.630279 | pk |
| PFL2325c | PKH_146580 | PVX_101315 | PY00378 | PBANKA_146140 | PCHAS_146370 | 4.39709 | 0.21371 | 3.9995  | 6.02965 | 0.75936 | 4.98081 | 1.03195 | 0.8259912 | 0.75936 | pb | 1.032489  | 4.980807 | pc |
| PFL2330w | PKH_146590 | PVX_101320 | PY05458 | PBANKA_146150 | PCHAS_146380 | 4.275   | 4.40981 | 4.09612 | 2.08108 | 0.2127  | 3.81702 | 0.86441 | 0.5573417 | 0.2127  | pb | 0.626903  | 3.81702  | pc |
| PFL2345c | PKH_146620 | PVX_101335 | PY02897 | PBANKA_146180 | PCHAS_146410 | 3.98446 | 4.83166 | 4.18606 | 5.43852 | 3.85801 | 3.83068 | 0.46385 | 0.2658074 | 5.43852 | py | 0.3006464 | 3.85801  | pb |
| PFL2355w | PKH_146640 | PVX_101345 | PY02899 | PBANKA_146200 | PCHAS_146430 | 1.96754 | 1.34486 | 2.00439 | 2.06783 | 1.62637 | 0.75499 | 0.38559 | 0.2201978 | 0.75499 | pc | 0.1195772 | 1.344862 | pk |
| PFL2370c | PKH_146670 | PVX_101360 | PY02902 | PBANKA_146230 | PCHAS_146460 | 4.19007 | 5.89758 | 5.56632 | 4.79271 | 4.95867 | 5.1803  | 0.45046 | 0.3425058 | 4.19007 | pf | 0.2488102 | 5.897585 | pk |
| PFL2400w | PKH_146770 | PVX_101395 | PY06282 | PBANKA_146290 | PCHAS_146520 | 2.00315 | 1.51946 | 2.76389 | 1.97615 | 0.58416 | 5.99016 | 0.8221  | 0.5326831 | 5.99016 | pc | 0.4689174 | 2.763893 | pv |
| PFL2410w | PKH_146790 | PVX_101405 | PY06730 | PBANKA_146310 | PCHAS_146540 | 6.22458 | 0.21734 | 4.73297 | 0.19683 | 4.60547 | 0.22223 | 0.65382 | 0.4096784 | 4.60547 | pb | 0.5057482 | 0.222233 | pc |



|          |            |            |         |               |              |         |         |         |         |         |         |         |           |         |    |           |          |    |
|----------|------------|------------|---------|---------------|--------------|---------|---------|---------|---------|---------|---------|---------|-----------|---------|----|-----------|----------|----|
| PFL2415w | PKH_146800 | PVX_101410 | PY05367 | PBANKA_146320 | PCHAS_146550 | 4.17359 | 4.07542 | 3.8717  | 4.9693  | 3.60578 | 3.2469  | 0.41566 | 0.2792673 | 4.9693  | py | 0.2826031 | 3.605778 | pb |
| PFL2430c | PKH_146830 | PVX_101425 | PY03599 | PBANKA_146350 | PCHAS_146580 | 1.47892 | 5.49191 | 2.99959 | 1.7816  | 1.0489  | 2.45381 | 0.91641 | 0.5851158 | 5.49191 | pk | 0.4268972 | 2.999588 | pv |
| PFL2445c | PKH_146860 | PVX_101440 | PY00647 | PBANKA_146380 | PCHAS_146610 | 3.05145 | 0.63446 | 3.62655 | 0.29589 | 0.36999 | 1.03538 | 1.06884 | 0.6841912 | 3.62655 | pv | 0.7705944 | 0.295886 | py |
| PFL2465c | PKH_146900 | PVX_101455 | PY01336 | PBANKA_146420 | PCHAS_146650 | 4.46952 | 4.18759 | 2.80622 | 0.47868 | 4.07849 | 1.97531 | 1.09316 | 0.7751161 | 0.47868 | py | 0.9688951 | 4.078493 | pb |
| PFL2475w | PKH_146920 | PVX_101465 | PY07601 | PBANKA_146450 | PCHAS_146670 | 1.60278 | 1.29773 | 1.74351 | 2.05554 | 0.41994 | 1.64377 | 0.35373 | 0.1797067 | 0.41994 | pb | 0.2246334 | 1.643772 | pc |
| PFL2490c | PKH_146950 | PVX_101480 | PY01704 | PBANKA_146480 | PCHAS_146700 | 1.83062 | 0.55023 | 2.88589 | 1.13745 | 0.42734 | 2.08451 | 0.781   | 0.5875127 | 2.88589 | pv | 0.7343909 | 1.137446 | py |
| PFL2505c | PKH_146960 | PVX_101485 | PY01808 | PBANKA_146490 | PCHAS_146710 | 5.4584  | 5.46142 | 5.35375 | 5.99348 | 5.39489 | 5.40777 | 0.12615 | 0.0342347 | 5.99348 | py | 0.039573  | 5.394889 | pb |

**Supplementary Table 3:** Functional enrichment analysis for outlier species orthologs using hypergeometric distribution function, related to Figure 4b.

Pathways testing (level for statistical significance = 0.05)

| ID | PathwayName                                                     | Genome | Input | Pathway | Input & Pathway | Direction of deviation from expected        | Hypergeometric test | Binomial   | GeneList                                                                                                                                                                                                                                                                                                          |
|----|-----------------------------------------------------------------|--------|-------|---------|-----------------|---------------------------------------------|---------------------|------------|-------------------------------------------------------------------------------------------------------------------------------------------------------------------------------------------------------------------------------------------------------------------------------------------------------------------|
| pb | MPM.Chaperone_assisted_protein_folding_                         | 3041   | 201   | 84      | 11              | over-representation (expect 5, observe 11)  | 0.02077359          | 0.02240696 | PF07_0103,PFL0815w,PFL0815w,PFL0815w,PF14_0241,PFL2275c,PF14_0324,PF14_0417,PF14_0223,PF0635w,PF10335w                                                                                                                                                                                                            |
| pb | MPM.Genes_coding_for_components_involved_in_ribosome_assembly   | 3041   | 201   | 130     | 29              | over-representation (expect 8, observe 29)  | 1.9438E-09          | 6.1951E-09 | PFL0830w,PF07_0092,PFA0330w,PF14_0042,PF07_0092,PF13_0177,PFA0330w,PF14_0456,PF13_0315,PF08_0026,PFF0100w,PF14_0494,PF0975w,PFL1490w,PF11_0090,MAL8P1.19,MAL13P1.93,PFE0300c,PFL1475w,PF07_0122,PF11_0259,PFF0625w,PFL2010c,PFL2475w,PF14_0055,PFL0830w,PF10455w,PF10295c,PF14_0274                               |
| pb | MPM.Import_of_proteins_into_the_mitochondrion                   | 3041   | 201   | 27      | 5               | over-representation (expect 1, observe 5)   | 0.0293572           | 0.0300003  | PF13_0180,PF13_0180,MAL8P1.14,PF14_0197,PF14_0197                                                                                                                                                                                                                                                                 |
| pb | MPM.Lsm_proteins_and_RNA_processing                             | 3041   | 201   | 12      | 3               | over-representation (expect 0, observe 3)   | 0.04014383          | 0.0404707  | MAL8P1.9,PF10_0314,PF13_0048                                                                                                                                                                                                                                                                                      |
| pb | MPM.Maturation_and_export_of_60S_and_40S_ribosomal_subunits     | 3041   | 201   | 120     | 32              | over-representation (expect 7, observe 32)  | 1.4303E-12          | 7.2303E-12 | PF07_0092,PF13_0177,PFA0330w,PFL0830w,PF14_0456,PF14_0042,PF08_0026,PF10455w,PFA0330w,PF14_0042,MAL13P1.322,PFL1490w,PF0975w,PF14_0494,PF07_0122,PFL2475w,PF14_0055,PFF0625w,PFL2010c,PF11_0090,PFL2010c,PFE0300c,PFL2010c,MAL8P1.19,PF11_0090,PF14_0055,PFL1475w,MAL8P1.19,PFF0625w,PFE0300c,PF14_0273,PF14_0550 |
| pb | MPM.Phosphoinositides_and_membrane_traffic                      | 3041   | 201   | 27      | 6               | over-representation (expect 1, observe 6)   | 0.00709002          | 0.00737599 | PF10_0126,PFL2195w,PF13_0285,PFA0515w,PF13_0285,PF07_0024                                                                                                                                                                                                                                                         |
| pb | MPM.Pre_ribosomal_particles_along_the_40S_assembly_pathway      | 3041   | 201   | 16      | 5               | over-representation (expect 1, observe 5)   | 0.00287455          | 0.00297114 | PFA0330w,PF13_0177,PFL1490w,PF0975w,PF14_0494                                                                                                                                                                                                                                                                     |
| pb | MPM.Pre_ribosomal_particles_along_the_60S_assembly_pathway      | 3041   | 201   | 28      | 6               | over-representation (expect 1, observe 6)   | 0.00853805          | 0.00887138 | PFF0625w,PFL2010c,PFL2475w,MAL8P1.19,PF14_0055,PF11_0090                                                                                                                                                                                                                                                          |
| pb | MPM.Protein_N_terminal_acetylation                              | 3041   | 201   | 11      | 3               | over-representation (expect 0, observe 3)   | 0.03161211          | 0.0318881  | MAL8P1.9,MAL8P1.200,MAL8P1.200                                                                                                                                                                                                                                                                                    |
| pb | MPM.Proteins_involved_in_steps_during_passage_through_prophase_ | 3041   | 201   | 21      | 4               | over-representation (expect 1, observe 4)   | 0.04561964          | 0.04621799 | PF10_0327,PF14_0031,PF14_0142,MAL13P1.21                                                                                                                                                                                                                                                                          |
| pb | MPM.Ribosomal_structure                                         | 3041   | 201   | 167     | 18              | over-representation (expect 11, observe 18) | 0.0355196           | 0.04080495 | PFC1020c,PFE1005w,PFE0810c,PF08_0076,PF11_0272,MAL13P1.272,PF0770c,PF08_0039,PF13_0171,PF13_0132,PFE0300c,PF13_0049,PFC0535w,PF10190w,PF07_0046,PF14_0539,PF10_0332,PF10890c                                                                                                                                      |
| pb | MPM.RNA_Degradation_Factors                                     | 3041   | 201   | 41      | 7               | over-representation (expect 2, observe 7)   | 0.01626565          | 0.0169719  | PF10_0314,PF13_0048,PF10455w,MAL13P1.170,PFF0100w,MAL8P1.9,PF13_0222                                                                                                                                                                                                                                              |

|    |                                                                                |      |     |     |    |                                               |            |            |                                                                                                                                                                                                       |
|----|--------------------------------------------------------------------------------|------|-----|-----|----|-----------------------------------------------|------------|------------|-------------------------------------------------------------------------------------------------------------------------------------------------------------------------------------------------------|
| pb | MPM.Splicing_of_pre_mRNA                                                       | 3041 | 201 | 121 | 20 | over-representation<br>(expect 8, observe 20) | 9.0686E-05 | 0.00013393 | PFC0955w,PFF0100w,PF11025w,PFL0970w,PF0565c,MAL7P1.201,PF13_0222,MAL13P1.322,PFF0500c,MAL13P1.35,PF13_0091,PFL2075c,PF14_0720,MAL8P1.9,MAL8P1.9,MAL8P1.61,PF14_0713,PFB0875c,PF11_0374,PFC1050w       |
| pb | MPM.tRNA_modifications                                                         | 3041 | 201 | 49  | 7  | over-representation<br>(expect 3, observe 7)  | 0.03982634 | 0.04115027 | PF14_0086,PF13_0259,MAL13P1.31,PF07_0015,PF13_0236,PF14_0711,PF10295c                                                                                                                                 |
| pc | MPM.ATP_dependent_chromatin_remodeling_complexes                               | 3041 | 219 | 37  | 8  | over-representation<br>(expect 2, observe 8)  | 0.00395591 | 0.00421008 | MAL7P1.209,PFL2215w,PFL2215w,PF14_0124,PF10_0232,PF10_0232,PFA0290w,PFF0560c                                                                                                                          |
| pc | MPM.ER_to_Golgi_translocation_and_quality_control                              | 3041 | 219 | 13  | 4  | over-representation<br>(expect 1, observe 4)  | 0.0111481  | 0.01133937 | PF10150c,MAL13P1.87,PF11_0098,PFE0625w                                                                                                                                                                |
| pc | MPM.Import_and_export_through_the_nuclear_pore                                 | 3041 | 219 | 24  | 5  | over-representation<br>(expect 1, observe 5)  | 0.02541858 | 0.02595146 | PF08_0087,PF08_0069,PF08_0087,PF11_0385,PF0900w                                                                                                                                                       |
| pc | MPM.Import_of_proteins_into_the_mitochondrion                                  | 3041 | 219 | 27  | 8  | over-representation<br>(expect 2, observe 8)  | 0.00042636 | 0.00046188 | PF08_0054,PF11_0351,MAL8P1.14,PF14_0328,PF11_0265,PF07_0110,PFE1230c,PFF0825c                                                                                                                         |
| pc | MPM.Inositol_phosphate_metabolism                                              | 3041 | 219 | 26  | 5  | over-representation<br>(expect 1, observe 5)  | 0.03500074 | 0.03566817 | MAL8P1.151,PF10_0101,PFC0475c,PFC0475c,MAL8P1.151                                                                                                                                                     |
| pc | MPM.Large_Tethering_Complexes_that_Act_in_the_Secretory_and_Endocytic_Pathways | 3041 | 219 | 33  | 7  | over-representation<br>(expect 2, observe 7)  | 0.00774528 | 0.00810597 | PFF0905w,PFF0905w,PF14_0397,PF13_0135,PF07_0111,PF14_0493,PF14_0397                                                                                                                                   |
| pc | MPM.Molecular_model_of_vesicle_exocytosis                                      | 3041 | 219 | 19  | 4  | over-representation<br>(expect 1, observe 4)  | 0.04302435 | 0.04355446 | PFF0665c,PF14_0300,PFF0665c,MAL13P1.16                                                                                                                                                                |
| pc | MPM.Rab_cycle                                                                  | 3041 | 219 | 42  | 7  | over-representation<br>(expect 3, observe 7)  | 0.02819153 | 0.02915746 | MAL13P1.244,PF11_0152,MAL13P1.16,MAL13P1.135,PFC0890w,PFC0582c,PFE0625w                                                                                                                               |
| pc | MPM.RNA_polymerase_III_transcribes_tRNA_and_5S_rRNA                            | 3041 | 219 | 11  | 3  | over-representation<br>(expect 0, observe 3)  | 0.03947257 | 0.03977027 | PF13_0150,PF0800c,PF14_0469                                                                                                                                                                           |
| pc | MPM.Splicing_of_pre_mRNA                                                       | 3041 | 219 | 121 | 20 | over-representation<br>(expect 8, observe 20) | 0.00029858 | 0.00041059 | PF14_0437,MAL13P1.14,PF14_0655,PFA0180w,PF0265w,MAL13P1.253,PF11695c,PFF0970w,PF11695c,PF14_0194,PFL1680w,PF11_0200,PF11_0524,MAL8P1.9,MAL13P1.385,MAL8P1.43,PF11_0524,MAL8P1.9,MAL13P1.385,PF11_0336 |
| pc | MPM.The_structures_of_RNA_polymerases                                          | 3041 | 219 | 22  | 6  | over-representation<br>(expect 1, observe 6)  | 0.00364924 | 0.0037985  | PFC0155c,PFC0155c,PFC0805w,PFL0665c,PF13_0150,PF11_0445                                                                                                                                               |
| pf | MPM.A_model_for_UbpX_function_in_the_regulation_of_PCNA_deubiquitylation       | 3041 | 176 | 20  | 4  | over-representation<br>(expect 1, observe 4)  | 0.02532373 | 0.02577664 | MAL13P1.216,PF08_0085,MAL13P1.216,PFE0835w                                                                                                                                                            |
| pf | MPM.CCR4_NOT_complex                                                           | 3041 | 176 | 18  | 4  | over-representation<br>(expect 1, observe 4)  | 0.01750315 | 0.01784465 | PFE0375w,PF11_0297,PF10_0062,PFL0190w                                                                                                                                                                 |
| pf | MPM.Classical_COPI_mediated_vesicular_transport                                | 3041 | 176 | 37  | 13 | over-representation<br>(expect 2, observe 13) | 5.5404E-08 | 7.7717E-08 | PF08_0120,PF14_0399,PF08010w,PF14_0407,PF14_0399,PF08010w,PFF0330w,PF14_0277,MAL8P1.121,PFE1340w,PFL2070w,PF14_0464,MAL13P1.16                                                                        |
| pf | MPM.Classical_COPII_mediated_vesicular_transport                               | 3041 | 176 | 32  | 9  | over-representation<br>(expect 1, observe 9)  | 5.2347E-05 | 6.0199E-05 | PFE1340w,PF14_0399,PF08010w,PF14_0399,PF08010w,PFB0640c,PF14_0464,MAL13P1.16,MAL13P1.171                                                                                                              |

|    |                                                                                                           |      |     |     |    |                                                |            |            |                                                                                                                                                                                                                                                     |
|----|-----------------------------------------------------------------------------------------------------------|------|-----|-----|----|------------------------------------------------|------------|------------|-----------------------------------------------------------------------------------------------------------------------------------------------------------------------------------------------------------------------------------------------------|
| pf | MPM.Folate_biosynthesis                                                                                   | 3041 | 176 | 14  | 3  | over-representation<br>(expect 0, observe 3)   | 0.0432574  | 0.04364796 | PFF1490w,PFF1490w,PF11100w                                                                                                                                                                                                                          |
| pf | MPM.Kinetochores_power_chromosome_movements_in_mitosis                                                    | 3041 | 176 | 47  | 7  | over-representation<br>(expect 2, observe 7)   | 0.0169682  | 0.01780248 | PFD1050w,PF10180w,MAL8P1.132,PFL0660w,PF0785w,PFD1050w,PF10180w                                                                                                                                                                                     |
| pf | MPM.Leucine_Isoleucine_and_Valine_metabolism                                                              | 3041 | 176 | 13  | 3  | over-representation<br>(expect 0, observe 3)   | 0.03545904 | 0.03579969 | PF08_0011,PF14_0589,PFE0225w                                                                                                                                                                                                                        |
| pf | MPM.Nuclear_genes_with_mitochondrial_signal_sequences                                                     | 3041 | 176 | 280 | 25 | over-representation<br>(expect 16, observe 25) | 0.0223751  | 0.02650788 | PF14_0695,PFE1080w,PF14_0589,MAL13P1.164,MAL7P1.66,PF11_0382,PF13_0068,PF14_0041,PF0495w,PF14_0709,PF14_0212,PF10_0097,PFL1150c,PFE0145w,PFL1605w,PF14_0616,PF10_0153,MAL13P1.84,PFE0225w,PF0370w,PF14_0721,PF0320c,MAL13P1.335,PF14_0266,MAL8P1.33 |
| pf | MPM.Phosphoinositides_and_membrane_traffic                                                                | 3041 | 176 | 27  | 5  | over-representation<br>(expect 1, observe 5)   | 0.01749201 | 0.01799232 | MAL13P1.51,PF13_0133,PFE0485w,PFE0485w,PF11_0187                                                                                                                                                                                                    |
| pf | MPM.Rab_cycle                                                                                             | 3041 | 176 | 42  | 10 | over-representation<br>(expect 2, observe 10)  | 9.5121E-05 | 0.00011157 | PF10345w,PF14_0699,MAL13P1.16,PF14_0464,PFL2070w,PFL0505c,MAL13P1.205,MAL13P1.51,PF08_0110,PF10155c                                                                                                                                                 |
| pf | MPM.Rab_proteins                                                                                          | 3041 | 176 | 12  | 4  | over-representation<br>(expect 0, observe 4)   | 0.00371929 | 0.00381154 | MAL13P1.51,PF10155c,MAL13P1.205,PF08_0110                                                                                                                                                                                                           |
| pf | MPM.Rab_proteins_in_intracellular_traffic                                                                 | 3041 | 176 | 16  | 4  | over-representation<br>(expect 0, observe 4)   | 0.01139706 | 0.01163873 | MAL13P1.205,MAL13P1.51,PF10155c,PF08_0110                                                                                                                                                                                                           |
| pf | MPM.Shikimate_Biosynthesis                                                                                | 3041 | 176 | 6   | 3  | over-representation<br>(expect 0, observe 3)   | 0.00334811 | 0.00339531 | PF11100w,PF11100w,MAL13P1.319                                                                                                                                                                                                                       |
| pk | MPM.Components_of_the_linear_motor_responsible_for_merozoite_motility_in_invasion                         | 3041 | 262 | 34  | 10 | over-representation<br>(expect 3, observe 10)  | 0.00038611 | 0.00042491 | PFE0785c,PFE0340c,MAL8P1.16,MAL13P1.130,PFE1285w,PF11_0431,PF08_0033,PF10_0107,PFL0925w,PF11565w                                                                                                                                                    |
| pk | MPM.Double_strand_break_repair_and_homologous_recombination                                               | 3041 | 262 | 11  | 4  | over-representation<br>(expect 1, observe 4)   | 0.0109258  | 0.01108364 | PFD0470c,PF08_0126,MAL8P1.76,MAL13P1.22                                                                                                                                                                                                             |
| pk | MPM.Generation_of_polyphosphates                                                                          | 3041 | 262 | 22  | 6  | over-representation<br>(expect 1, observe 6)   | 0.0088327  | 0.00909549 | PFF1350c,PFE1250w,MAL13P1.22,PFL1790w,PFL1245w,PFL0670c                                                                                                                                                                                             |
| pk | MPM.Genes_coding_for_the_components_of_the_proteasome_degradation_machinery_and_their_timed_transcription | 3041 | 262 | 103 | 15 | over-representation<br>(expect 8, observe 15)  | 0.02935178 | 0.03182293 | PF11_0303,PF14_0632,PF13_0063,PF10_0081,PF13_0033,PF13_0282,MAL13P1.270,PF11545c,PF10_0111,PFL1790w,PFL1245w,PF10_0117,PFL1620w,PFD0680c,PF10_0114                                                                                                  |
| pk | MPM.Glycolysis                                                                                            | 3041 | 262 | 28  | 8  | over-representation<br>(expect 2, observe 8)   | 0.00184216 | 0.00195169 | PFL0780w,PF11_0294,PF1300w,PF11105w,PF11_0338,PF0275w,PF0210c,PF11295c                                                                                                                                                                              |
| pk | MPM.Histone_acetylation                                                                                   | 3041 | 262 | 30  | 8  | over-representation<br>(expect 2, observe 8)   | 0.00298023 | 0.00314648 | PF13_0185,PF07_0054,PF10_0200,PF10_0078,PF13_0152,PF13_0152,PF14_0489,MAL13P1.233                                                                                                                                                                   |
| pk | MPM.Histone_chaperones                                                                                    | 3041 | 262 | 38  | 7  | over-representation<br>(expect 3, observe 7)   | 0.04039614 | 0.04142219 | PF10_0078,PFA0520,PF14_0393,PFA0520c,PFD0470c,PF13_0291,PFL0580w                                                                                                                                                                                    |

|    |                                                                                       |      |     |     |    |                                                |            |            |                                                                                                                                                                                                                                                                                                                                                                                                                                                                                                                                                                |
|----|---------------------------------------------------------------------------------------|------|-----|-----|----|------------------------------------------------|------------|------------|----------------------------------------------------------------------------------------------------------------------------------------------------------------------------------------------------------------------------------------------------------------------------------------------------------------------------------------------------------------------------------------------------------------------------------------------------------------------------------------------------------------------------------------------------------------|
| pk | MPM.Initiation_of_translation                                                         | 3041 | 262 | 43  | 11 | over-representation<br>(expect 3, observe 11)  | 0.00074484 | 0.00082611 | PF11_0447,PF0345w,PF10_0136,PF14_0104,PFL2430c,MAL7P1.81,MAL8P1.83,PFE0885w,PFL0625c,PF10625c,PF11_0225                                                                                                                                                                                                                                                                                                                                                                                                                                                        |
| pk | MPM.Molecular_motor_prototypes                                                        | 3041 | 262 | 42  | 8  | over-representation<br>(expect 3, observe 8)   | 0.02434665 | 0.02523291 | PF10_0196,PF10_0224,PF11_0240,PF10260c,PF07_0104,PF0860w,PF0675c,PF10_0193                                                                                                                                                                                                                                                                                                                                                                                                                                                                                     |
| pk | MPM.Nucleosome_assembly_and_regulation_                                               | 3041 | 262 | 43  | 8  | over-representation<br>(expect 3, observe 8)   | 0.02775975 | 0.02873089 | PF07_0054,PF13_0185,PF14_0393,PFA0520c,PFA0520,PF14_0393,PF14_0393,PF13_0152                                                                                                                                                                                                                                                                                                                                                                                                                                                                                   |
| pk | MPM.Proteasome_mediated_proteolysis_of_ubi-<br>quinated_proteins                      | 3041 | 262 | 100 | 18 | over-representation<br>(expect 8, observe 18)  | 0.00177603 | 0.0021359  | PF0680c,PFL1790w,PFL1245w,PF10_0117,PFL1620w,PFL0325w,PF13_0063,PF10_0081,PF13_0033,PF13_0282,MAL13P1.270,PF11545c,PF10_0111,PF11_0303,PF14_0632,PF13_0063,PF10_0081,PF13_0033                                                                                                                                                                                                                                                                                                                                                                                 |
| pk | MPM.Protein_biosynthesis                                                              | 3041 | 262 | 55  | 9  | over-representation<br>(expect 4, observe 9)   | 0.04286663 | 0.04438844 | PF07_0073,PFL0670c,PF10_0149,PF13_0257,PF13_0205,PF10645w,PFL0210c,MAL7P1.20,MAL8P1.140                                                                                                                                                                                                                                                                                                                                                                                                                                                                        |
| pk | MPM.S_Glutathionylated_proteins                                                       | 3041 | 262 | 320 | 39 | over-representation<br>(expect 27, observe 39) | 0.01667047 | 0.02191416 | PF11105w,PF1300w,PFE1250w,PF13_0070,PF08_0095,PF1025c,PF07_0054,PFA0520c,PFE0165w,PF0950w,PFL1725w,PF10_0111,PF14_0242,PF11_0048,PF14_0517,PF11545c,PF13_0282,MAL13P1.270,MAL13P1.540,PFL1245w,PFL2140c,PF14_0377,PF11_0352,PF11170c,PF0250c,PF10_0114,PF10_0075,PF11_0043,PFE0850c,PF10645w,PFL0210c,PF14_0104,MAL7P1.81,PFL0670c,PF10_0149,PF07_0073,PF1055w,PF14_0083,PF13_0065                                                                                                                                                                             |
| pk | MPM.Signal_recognition_particle_mediated_targeting_of_membrane_and_secretory_proteins | 3041 | 262 | 10  | 3  | over-representation<br>(expect 0, observe 3)   | 0.04812282 | 0.04840976 | PFL2245w,MAL13P1.231,PFL0785c                                                                                                                                                                                                                                                                                                                                                                                                                                                                                                                                  |
| pk | MPM.The_acidocalcisome                                                                | 3041 | 262 | 36  | 8  | over-representation<br>(expect 3, observe 8)   | 0.00979027 | 0.01023609 | PFF0450c,PF13_0065,PF13_0130,PF13_0227,PF13_0034,MAL13P1.206,PF11_0338,MAL13P1.23                                                                                                                                                                                                                                                                                                                                                                                                                                                                              |
| pk | MPM.The_phosphoproteome_of_Plasmodium_falciparum_infected_RBCs                        | 3041 | 262 | 334 | 56 | over-representation<br>(expect 28, observe 56) | 2.1748E-07 | 8.7285E-07 | PFF1300w,MAL8P1.91,MAL13P1.233,PF10_0078,PFE0560c,PF0950w,PF11_0052,PFL0930w,MAL13P1.22,PF14_0563,PFE0430w,PF0590c,PF10_0114,PF10865w,PFL0075w,PF08_0065,MAL7P1.157a,PF10_0075,PF11_0404,PF14_0471,PF13_0109,PF13_0261,PFE0465c,PFE0925c,PF14_0028,MAL7P1.320,PFE0850c,PFF0345w,PFL0210c,PFL0625c,MAL8P1.83,PF14_0104,PF14_0408,PF13_0258,PF14_0614,MAL8P1.109,MAL8P1.157,PF11_0149,PFE0340c,PFL1790w,PF0680c,PF10_0111,PF11_0303,PF14_0632,PF13_0282,PF07_0020,PF14_0359,PFE0380c,PFL1620w,MAL13P1.206,PFF0450c,PF11295c,PFL0950c,PFL1140w,PF14_0416,PFL0440c |
| pk | MPM.Transporters_of_the_plasma_membrane                                               | 3041 | 262 | 71  | 16 | over-representation<br>(expect 6, observe 16)  | 0.00024208 | 0.00029548 | PFB0210c,PF11295c,PFL0620c,PF10_0215,PF13_0065,PF13_0227,PF13_0130,PF13_0034,PF11_0338,MAL13P1.206,PFF0450c,PF10_0215,MAL13P1.206,PFL0950c,PF14_0369,MAL13P1.23                                                                                                                                                                                                                                                                                                                                                                                                |
| pv | MPM.A_model_for_UbpX_function_in_the_regulation_of_PCNA_deubiquitylation              | 3041 | 209 | 20  | 5  | over-representation<br>(expect 1, observe 5)   | 0.00966727 | 0.00992991 | PF13_0328,PF10_0227,PFE1355c,PF14_0145,PF14_0145                                                                                                                                                                                                                                                                                                                                                                                                                                                                                                               |
| pv | MPM.Asparagine_and_Aspartate_metabolism                                               | 3041 | 209 | 8   | 3  | over-representation<br>(expect 0, observe 3)   | 0.01384171 | 0.01398057 | MAL13P1.221,PF13_0287,PFE0475w                                                                                                                                                                                                                                                                                                                                                                                                                                                                                                                                 |

|    |                                                                                                           |      |     |     |    |                                               |            |            |                                                                                                                                                                                                                                                                    |
|----|-----------------------------------------------------------------------------------------------------------|------|-----|-----|----|-----------------------------------------------|------------|------------|--------------------------------------------------------------------------------------------------------------------------------------------------------------------------------------------------------------------------------------------------------------------|
| pv | MPM.CCR4_NOT_complex                                                                                      | 3041 | 209 | 18  | 4  | over-representation<br>(expect 1, observe 4)  | 0.03090842 | 0.03135083 | MAL8P1.104,PFL1705w,PF10_0143,PFC0915w                                                                                                                                                                                                                             |
| pv | MPM.Cotranslational_cleavage_of_N_terminal_methionine_residues_and_N_terminal_acetylation                 | 3041 | 209 | 12  | 3  | over-representation<br>(expect 0, observe 3)  | 0.04434407 | 0.04468082 | PFA0465c,PFA0465c,PFA0465c                                                                                                                                                                                                                                         |
| pv | MPM.DNA_Replication                                                                                       | 3041 | 209 | 38  | 7  | over-representation<br>(expect 2, observe 7)  | 0.01324252 | 0.01382243 | MAL13P1.22,PF13_0328,PF13_0330,PF11_0131,PF11_0117,PFB0840w,PF13_0328                                                                                                                                                                                              |
| pv | MPM.Double_strand_break_repair_and_homologous_recombination                                               | 3041 | 209 | 11  | 3  | over-representation<br>(expect 0, observe 3)  | 0.03498794 | 0.03527398 | PF10235w,PF11_0087,MAL13P1.22                                                                                                                                                                                                                                      |
| pv | MPM.Genes_coding_for_components_involved_in_ribosome_assembly                                             | 3041 | 209 | 130 | 22 | over-representation<br>(expect 9, observe 22) | 4.9997E-05 | 7.8387E-05 | PF07_0083,PF13_0051,PF14_0584,PF08_0055,MAL13P1.14,PF10_0209,PFL2295w,PFL1230w,PFB0370c,PF14_0156,PF0905w,PF1500c,PF11235w,PF14_0221,MAL7P1.24,MAL13P1.341,PF10_0278,PF14_0292,MAL13P1.243,MAL13P1.36,MAL13P1.36,PF14_0292                                         |
| pv | MPM.Genes_coding_for_enzymes_proteins_involved_in_DNA_replication                                         | 3041 | 209 | 56  | 8  | over-representation<br>(expect 3, observe 8)  | 0.03537335 | 0.03680625 | PF10235w,PFB0840w,PF11_0117,PF13_0330,MAL13P1.22,PF08_0100,PF11_0071,PF14_0639                                                                                                                                                                                     |
| pv | MPM.Genes_coding_for_the_components_of_the_proteasome_degradation_machinery_and_their_timed_transcription | 3041 | 209 | 103 | 13 | over-representation<br>(expect 7, observe 13) | 0.02744475 | 0.03005077 | PF10_0298,PF14_0676,PF0305c,PF1325c,PF10_0276,PF11085w,PF11_0177,PF14_0145,PF10225w,PF1355c,PF11_0177,PFL1845c,PF13_0344                                                                                                                                           |
| pv | MPM.Genes_involved_in_excision_repair                                                                     | 3041 | 209 | 80  | 12 | over-representation<br>(expect 5, observe 12) | 0.00753967 | 0.00836956 | PF0420c,PF10_0080,PF13_0330,PF08_0048,PF11_0071,PF08_0100,PFB0840w,PF11_0117,PF10235w,PF13_0328,MAL13P1.22,PFB0180w                                                                                                                                                |
| pv | MPM.Maturation_and_export_of_60S_and_40S_ribosomal_subunits                                               | 3041 | 209 | 120 | 27 | over-representation<br>(expect 8, observe 27) | 1.4659E-08 | 3.7325E-08 | PFB0370c,PF10_0209,PF14_0584,PFL2295w,MAL13P1.14,PF08_0055,PF1500c,PF13_0051,MAL13P1.36,PFB0370c,PF14_0156,PF14_0156,PF14_0156,PF1500c,PF10_0278,PF0710w,PF1085w,PF10_0278,MAL13P1.341,MAL7P1.24,PF10_0278,PF14_0221,PF1500c,MAL13P1.341,MAL7P1.24,PF1085w,PF1085c |
| pv | MPM.Nucleotide_excision_repair                                                                            | 3041 | 209 | 32  | 6  | over-representation<br>(expect 2, observe 6)  | 0.01966187 | 0.02027917 | MAL13P1.22,PF11_0117,PF13_0328,PFB0840w,PF10235w,PF10_0080                                                                                                                                                                                                         |
| pv | MPM.One_carbon_enzyme_systems_serine_hydroxymethyltransferase_and_glycine_cleavage_complex                | 3041 | 209 | 9   | 3  | over-representation<br>(expect 0, observe 3)  | 0.01972464 | 0.01990994 | PFL1720w,PFL1550w,PF11_0172                                                                                                                                                                                                                                        |
| pv | MPM.Phosphatidylcholine_metabolism                                                                        | 3041 | 209 | 24  | 5  | over-representation<br>(expect 1, observe 5)  | 0.02117881 | 0.02166649 | PF14_0020,PFB0410c,PF11180w,PF1375c,PF11_0197                                                                                                                                                                                                                      |
| pv | MPM.Pre_ribosomal_particles_along_the_40S_assembly_pathway                                                | 3041 | 209 | 16  | 4  | over-representation<br>(expect 1, observe 4)  | 0.02047498 | 0.02080076 | PF10_0209,MAL13P1.14,PF1500c,PF0905w                                                                                                                                                                                                                               |

|    |                                                                                                           |      |     |     |    |                                             |            |            |                                                                                                                                                                                                                                                                             |
|----|-----------------------------------------------------------------------------------------------------------|------|-----|-----|----|---------------------------------------------|------------|------------|-----------------------------------------------------------------------------------------------------------------------------------------------------------------------------------------------------------------------------------------------------------------------------|
| pv | MPM.Pre_ribosomal_particles_along_the_60S_assembly_pathway                                                | 3041 | 209 | 28  | 7  | over-representation (expect 1, observe 7)   | 0.00223413 | 0.00236585 | PF14_0221,PF14_0292,PF11_0245,PF1500c,PF1500c,PF1500c,PF1500c                                                                                                                                                                                                               |
| pv | MPM.Pyrimidine_metabolism                                                                                 | 3041 | 209 | 25  | 5  | over-representation (expect 1, observe 5)   | 0.02503698 | 0.02558893 | PF14_0053,PFL1720w,MAL13P1.221,PF13_0349,PF13_0349                                                                                                                                                                                                                          |
| pv | MPM.Rab_cycle                                                                                             | 3041 | 209 | 42  | 7  | over-representation (expect 2, observe 7)   | 0.02242806 | 0.02328922 | PF13_0117,PF10_0373,MAL13P1.16,MAL13P1.113,PF11_0461,PFA0335w,PFE0545c                                                                                                                                                                                                      |
| pv | MPM.tRNA_modifications                                                                                    | 3041 | 209 | 49  | 7  | over-representation (expect 3, observe 7)   | 0.04764697 | 0.04906862 | PFI0920c,PF07_0071,PF14_0322,PF10_0175,PFL2305w,PF11_0348,PF11_0212                                                                                                                                                                                                         |
| py | MPM.Base_excision_repair_of_AP_sites                                                                      | 3041 | 428 | 43  | 12 | over-representation (expect 6, observe 12)  | 0.01415398 | 0.01482083 | PFF0715c,PFI0835c,MAL13P1.22,PF10_0165,PFF1470c,PFF1470c,MAL7P1.32,PFB0160w,PFB0265c,PFE0215w,PF11650w,PF10860c                                                                                                                                                             |
| py | MPM.Control_of_the_mitotic_spindle_organization_by_kinesins                                               | 3041 | 428 | 10  | 4  | over-representation (expect 1, observe 4)   | 0.040392   | 0.0406609  | PFC0770c,PFL2165w,PFL2165w,PFC0385c                                                                                                                                                                                                                                         |
| py | MPM.ER_to_Golgi_translocation_and_quality_control                                                         | 3041 | 428 | 13  | 5  | over-representation (expect 1, observe 5)   | 0.02630499 | 0.02659018 | PF13_0124,MAL13P1.163,MAL13P1.241,PFF0365c,PFE0690c                                                                                                                                                                                                                         |
| py | MPM.Folate_biosynthesis                                                                                   | 3041 | 428 | 14  | 6  | over-representation (expect 2, observe 6)   | 0.00828872 | 0.00844245 | MAL13P1.67,PF13_0140,PF13_0140,PFD0830w,PFD0830w,PFL1155w                                                                                                                                                                                                                   |
| py | MPM.Genes_coding_for_chaperones_and_their_regulators                                                      | 3041 | 428 | 134 | 28 | over-representation (expect 19, observe 28) | 0.02967745 | 0.03347661 | PF0462w,PFI0935w,PFE1170w,PFE0135w,PFB0595w,MAL8P1.2,PF11_0099,PF08_0032,PF08_0115,PF14_0137,PF14_0213,PFE0135w,PF11_0443,PFI0875w,MAL13P1.52,MAL13P1.139,MAL8P1.17,PF11_0170,PF13_0122,PFE0505w,PFE1430c,PFL0120c,PFC0350c,PF11_0088,PFI0350c,MAL7P1.7,PF14_0063,PF08_0063 |
| py | MPM.Genes_coding_for_enzymes_proteins_involved_in_DNA_replication                                         | 3041 | 428 | 56  | 18 | over-representation (expect 8, observe 18)  | 0.00039978 | 0.00045813 | PFE0520c,PFB0895c,PF11_0078,PF11_0477,PF14_0470,PF14_0366,PFC0340w,PF10_0165,PFF1470c,PF14_0234,MAL13P1.22,PFI0385c,PFB0265c,PFE0270c,MAL7P1.145,PF11650w,PFE0675c,PFI0835c                                                                                                 |
| py | MPM.Genes_coding_for_Fe_S_containing_proteins                                                             | 3041 | 428 | 17  | 11 | over-representation (expect 2, observe 11)  | 2.1192E-06 | 2.3247E-06 | PFL0705c,PF14_0373,PF07_0085,PFF0715c,PF13_0229,PF14_0334,MAL13P1.220,PFF1070c,PFE1240w,PFL1345c,PF14_0066                                                                                                                                                                  |
| py | MPM.Genes_coding_for_the_components_of_the_proteasome_degradation_machinery_and_their_timed_transcription | 3041 | 428 | 103 | 27 | over-representation (expect 14, observe 27) | 0.00068425 | 0.00085111 | MAL13P1.190,PF10_0174,PF14_0025,MAL13P1.343,PF0665c,PF11_0314,PFL2345c,PFF0420c,PF07_0112,PF14_0716,PFC0745c,PF13_0156,PFA0400c,PFE0915c,MAL8P1.142,PF13_0182,MAL13P1.227,PFC0510w,PFC0740c,PFL1830w,PF13_0084,MAL7P1.147,MAL7P1.147,PF14_0576,PFF1445c,PF0880w,PF11_0393   |
| py | MPM.Genes_involved_in_excision_repair                                                                     | 3041 | 428 | 80  | 18 | over-representation (expect 11, observe 18) | 0.03397628 | 0.03629309 | PFF0715c,PFI0835c,MAL7P1.32,PFF1470c,PF10_0165,PFE0215w,MAL13P1.76,PF13_0279,PFB0160w,PFB0265c,PFE0270c,PF11650w,PFB0895c,MAL13P1.22,PF07_0105,MAL7P1.145,PF14_0051,PFI0385c                                                                                                |
| py | MPM.Involvement_of_GTP_binding_proteins_and_ribosomes_in_a_minino_acid_shortage                           | 3041 | 428 | 5   | 3  | over-representation (expect 0, observe 3)   | 0.02222123 | 0.02232493 | PF14_0423,MAL13P1.26,PFL0390c                                                                                                                                                                                                                                               |

|    |                                                                                |      |     |     |    |                                             |            |            |                                                                                                                                                                                                                                                                                                          |
|----|--------------------------------------------------------------------------------|------|-----|-----|----|---------------------------------------------|------------|------------|----------------------------------------------------------------------------------------------------------------------------------------------------------------------------------------------------------------------------------------------------------------------------------------------------------|
| py | MPM.Large_Tethering_Complexes_that_Act_in_the_Secretory_and_Endocytic_Pathways | 3041 | 428 | 33  | 9  | over-representation (expect 4, observe 9)   | 0.03388477 | 0.03469156 | PF11_0262,PF14_0548,PF10300w,PFL2415w,PF14_0064,PFE0765w,PF13_0053,PF13_0274,PFL2090c                                                                                                                                                                                                                    |
| py | MPM.Leucine_Isoleucine_and_Valine_metabolism                                   | 3041 | 428 | 13  | 5  | over-representation (expect 1, observe 5)   | 0.02630499 | 0.02659018 | PFF1095w,PF13_0179,PF14_0232,PF10_0167,PFL1940w                                                                                                                                                                                                                                                          |
| py | MPM.Methionine_and_polyamine_metabolism                                        | 3041 | 428 | 23  | 7  | over-representation (expect 3, observe 7)   | 0.0335915  | 0.03415428 | PFL1775c,PF10_0197,PF13_0016,MAL13P1.255,MAL13P1.67,PFE0660c,PF10_0289                                                                                                                                                                                                                                   |
| py | MPM.Molecular_markers_of_resistance_to_antimalarial_drugs                      | 3041 | 428 | 13  | 5  | over-representation (expect 1, observe 5)   | 0.02630499 | 0.02659018 | MAL7P1.27,PF0830w,PF14_0373,PF10_0120,PF13_0019                                                                                                                                                                                                                                                          |
| py | MPM.Nucleotide_excision_repair                                                 | 3041 | 428 | 32  | 12 | over-representation (expect 4, observe 12)  | 0.00080771 | 0.00086755 | MAL13P1.22,MAL13P1.76,PF13_0279,PFL2125c,PF10_0165,PFB0160w,PFB0265c,PFB0265c,PFB0895c,PF0340w,PFF1470c,PF11650w                                                                                                                                                                                         |
| py | MPM.Plasmodium_falciparum_chromatin_landscape                                  | 3041 | 428 | 22  | 7  | over-representation (expect 3, observe 7)   | 0.02646964 | 0.02694696 | PF0190w,PF13_0293,PF11_0160,PF11260c,PF0795w,PF10_0036,PFL1345c                                                                                                                                                                                                                                          |
| py | MPM.Proteasome_mediated_proteolysis_of_ubiquitinated_proteins                  | 3041 | 428 | 100 | 31 | over-representation (expect 14, observe 31) | 7.7379E-06 | 1.1519E-05 | MAL7P1.147,PF14_0576,PFL1830w,PF13_0084,PF08_0056,MAL7P1.147,PF13_0182,MAL13P1.227,PF0740c,PF0510w,PF0880w,PF0665c,PF11_0314,PFL2345c,PF0420c,PF07_0112,PF14_0716,PF0745c,PF13_0156,PFA0400c,PFE0915c,MAL8P1.142,MAL13P1.190,PF10_0174,PF14_0025,MAL13P1.343,PF0880w,PFB0240w,PF0665c,PF11_0314,PFL2345c |
| py | MPM.Protein_kinase_coding_genes                                                | 3041 | 428 | 107 | 23 | over-representation (expect 15, observe 23) | 0.03268009 | 0.03583039 | MAL7P1.100,PF14_0346,MAL13P1.278,PF0385c,PF11_0464,PF07_0072,PFB0815w,PFB0665w,MAL7P1.18,PF11_0377,PF10_0141,MAL13P1.185,PFE0170c,PF11275w,PF14_0423,MAL7P1.91,PF11280c,PF11_0488,PF11_0220,PF14_0476,PF13_0232,PF13_0022,PFL1110c                                                                       |
| py | MPM.Proteins_targeted_by_the_thioredoxin_superfamily_enzymes                   | 3041 | 428 | 44  | 11 | over-representation (expect 6, observe 11)  | 0.04698552 | 0.04848161 | MAL13P1.241,MAL7P1.122,MAL8P1.17,MAL8P1.69,PF08_0019,PF11_0248,PF13_0141,PF0166w,PFF0435w,PFF0715c,PF10875w                                                                                                                                                                                              |
| py | MPM.Proteins_with_ER_retention_sequences                                       | 3041 | 428 | 13  | 5  | over-representation (expect 1, observe 5)   | 0.02630499 | 0.02659018 | PF10875w,MAL8P1.17,PF11_0099,MAL13P1.121,PF10_0104                                                                                                                                                                                                                                                       |
| py | MPM.Purine_metabolism                                                          | 3041 | 428 | 35  | 10 | over-representation (expect 5, observe 10)  | 0.02362496 | 0.02440232 | PF10_0154,PFE0660c,PF10_0086,PF0755c,PFA0530c,MAL13P1.119,PF10_0289,MAL13P1.121,PFB0295w,PF10_0123                                                                                                                                                                                                       |
| py | MPM.Pyridoxal_phosphate_Vitamin_B6_metabolism                                  | 3041 | 428 | 23  | 8  | over-representation (expect 3, observe 8)   | 0.01019112 | 0.01047309 | PF14_0570,PF07_0059,PF11_0169,MAL13P1.324,PF14_0534,PFF0435w,PF07_0068,PF0285c                                                                                                                                                                                                                           |
| py | MPM.RNA_polymerase_II_transcribed_mRNA                                         | 3041 | 428 | 40  | 12 | over-representation (expect 5, observe 12)  | 0.00690268 | 0.00727209 | PF14_0374,PF11_0477,PF14_0470,MAL13P1.76,PFL2125c,PF13_0279,PF07_0057,PF13_0023,PF13_0341,MAL8P1.131,PF10210c,PF14_0718                                                                                                                                                                                  |



|    |                                                                |      |     |     |    |                                                |            |            |                                                                                                                                                                                                                                                                                                                                                                                                                                                                                                                                                                                                                                                                                         |
|----|----------------------------------------------------------------|------|-----|-----|----|------------------------------------------------|------------|------------|-----------------------------------------------------------------------------------------------------------------------------------------------------------------------------------------------------------------------------------------------------------------------------------------------------------------------------------------------------------------------------------------------------------------------------------------------------------------------------------------------------------------------------------------------------------------------------------------------------------------------------------------------------------------------------------------|
| py | MPM.S_Glutathionylated_proteins                                | 3041 | 428 | 320 | 71 | over-representation<br>(expect 45, observe 71) | 2.1647E-05 | 6.1924E-05 | PF11_0145,PF13_0141,PF13_0234,PF13_0143,PFE0730c,PF10_0289,PF10_0086,PFB0295w,PF0830w,PF14_0100,PF11_0282,PF10_0154,PFL2465c,PFE0660c,PF1335c,PF11155w,PF11310w,PF0435w,PF0920w,PF10185c,PF0350c,PF11475w,PF14_0102,MAL7P1.122,PF07_0085,PFA0580c,MAL8P1.69,PF11_0314,PFA0400c,PF11110c,PF11_0377,PF13_0232,PFE0505w,MAL8P1.17,PF0595w,PF10875w,PF11_0099,MAL8P1.142,PF0745c,PF0420c,PF07_0112,PFE0915c,PF13_0156,PF14_0716,PF10_0203,PF08_0019,PF1420w,PFE0690c,PF12060c,PF14_0064,PF08_0071,PF0271c,PF0166w,PF10860c,PF11_0250,PF10700c,PF11170w,PF10475w,PF07_0057,PFE1020w,PF10460w,PF13_0214,PF13_0170,PF13_0179,PF1095w,PF13_0262,PF11_0270,PF13_0013,PF14_0230,PF10590c,PFE0790c |
| py | MPM.The_phosphoproteome_of_Plasmodium_falciparum_infected_RBCs | 3041 | 428 | 334 | 64 | over-representation<br>(expect 47, observe 64) | 0.00587655 | 0.00934935 | PF14_0334,PFE0765w,PF13_0253,PF0150w,PF11485c,PF14_0100,PF11155w,PF10925w,PF11_0053,PF10185c,MAL13P1.16,PF11565c,PF13_0274,PFE1305c,PF10200c,PF12090c,MAL7P1.12,MAL13P1.22,PF10860c,PFE0520c,PF1470c,PF07_0023,PF13_0095,PF11_0477,PFE0270c,PF08895c,PF08_0074,PF11_0049,PF07_0105,PF10415c,PF11170w,MAL13P1.120,PF11_0091,PF0375c,PF0865w,MAL13P1.92,PF13_0214,PF1095w,MAL13P1.185,MAL13P1.278,PF11_0220,PF11_0488,PF0815w,PF14_0346,PF13_0232,MAL7P1.147,PFE1010w,PF07_0112,PF0420c,MAL8P1.69,PF10875w,PF08_0032,PF0740c,PFE0505w,PF1430c,PF11110c,PF11280c,MAL7P1.27,PF13_0019,PF14_0387,PF10720w,PF10590c,MAL7P1.155,PF14_0395                                                      |
| py | MPM.tRNA_modifications                                         | 3041 | 428 | 49  | 13 | over-representation<br>(expect 7, observe 13)  | 0.02012223 | 0.0211221  | PF10_0289,PF11350w,PF14_0174,PF11_0198,PF11_0284,PF10_0191,MAL13P1.31,PF11_0305,PF07_0095,PF11_0095,PF11_0144,PF14_0620,PF13_0087                                                                                                                                                                                                                                                                                                                                                                                                                                                                                                                                                       |

**Supplementary Table 4:** List of 240 transcriptionally conserved orthologs with positive druggability index score (DIS) obtained from TDR database, with its corresponding peak expression in IDC, related to Figure 6. Y denotes essentiality evidence in *P. berghei* knockout studies from RMgMDB.

| gene_ID  | gene_product                                   | pfam_domains    | go_terms                                                                                                                                                                                                                                                                                                                             | druggability_evidence_index | idc_peak_phase | RMgMDB_essentiality |
|----------|------------------------------------------------|-----------------|--------------------------------------------------------------------------------------------------------------------------------------------------------------------------------------------------------------------------------------------------------------------------------------------------------------------------------------|-----------------------------|----------------|---------------------|
| PFB0210c | hexose transporter, PfHT1                      |                 | GO:0005215 (transporter activity); GO:0006810 (transport); GO:0015145 (monosaccharide transmembrane transporter activity); GO:0015749 (monosaccharide transport); GO:0016020 (membrane); GO:0016021 (integral to membrane); GO:0022891 (substrate-specific transmembrane transporter activity); GO:0055085 (transmembrane transport) | 0.4                         | 2.2879625      | Y                   |
| PFC0525c | glycogen synthase kinase 3                     |                 | GO:0004672 (protein kinase activity); GO:0004674 (protein serine/threonine kinase activity); GO:0004696 (glycogen synthase kinase 3 activity); GO:0004713 (protein tyrosine kinase activity); GO:0005524 (ATP binding); GO:0006468 (protein amino acid phosphorylation); GO:0018105 (peptidyl-serine phosphorylation)                | 0.9                         | 4.3221154      | Y                   |
| PFD0230c | protease, putative                             | PF03074 (GCS)   | GO:0006508 (proteolysis); GO:0008234 (cysteine-type peptidase activity); GO:0020011 (apicoplast); GO:0030163 (protein catabolic process)                                                                                                                                                                                             | 0.3                         | 5.6782677      | Y                   |
| PFE1120w | conserved Plasmodium protein, unknown function | PF08423 (Rad51) | GO:0004198 (calcium-dependent cysteine-type endopeptidase activity); GO:0005622 (intracellular); GO:0006508 (proteolysis)                                                                                                                                                                                                            | 0.5                         | 5.5552911      | Y                   |
| PFF0260w | serine/threonine protein kinase, Pfnk-5        |                 | GO:0004672 (protein kinase activity); GO:0004674 (protein serine/threonine kinase activity); GO:0004713 (protein tyrosine kinase activity); GO:0005524 (ATP binding); GO:0006468 (protein amino acid phosphorylation)                                                                                                                | 0.5                         | 4.499201       | Y                   |

|           |                                                   |                                                                                                                                                                                      |                                                                                                                                                                                                                                                                              |     |           |   |
|-----------|---------------------------------------------------|--------------------------------------------------------------------------------------------------------------------------------------------------------------------------------------|------------------------------------------------------------------------------------------------------------------------------------------------------------------------------------------------------------------------------------------------------------------------------|-----|-----------|---|
| PF08_0129 | serine/threonine protein phosphatase, putative    |                                                                                                                                                                                      | GO:0004722 (protein serine/threonine phosphatase activity); GO:0004723 (calcium-dependent protein serine/threonine phosphatase activity); GO:0006470 (protein amino acid dephosphorylation); GO:0016787 (hydrolase activity)                                                 | 0.8 | 5.5635077 | Y |
| PF08_0108 | plasmepsin X                                      | PF00117 (GATase); PF00958 (GMP_synt_C)                                                                                                                                               | GO:0004190 (aspartic-type endopeptidase activity); GO:0006508 (proteolysis)                                                                                                                                                                                                  | 0.6 | 6.2092867 | Y |
| PF11360c  | serine/threonine protein phosphatase, putative    | PF00753 (Lactamase_B)                                                                                                                                                                | GO:0016787 (hydrolase activity)                                                                                                                                                                                                                                              | 0.3 | 4.3063381 | Y |
| PF11475w  | merozoite surface protein 1 precursor             | PF00562 (RNA_pol_Rpb2_6); PF04560 (RNA_pol_Rpb2_7); PF04561 (RNA_pol_Rpb2_2); PF04563 (RNA_pol_Rpb2_1); PF04565 (RNA_pol_Rpb2_3); PF04566 (RNA_pol_Rpb2_4); PF04567 (RNA_pol_Rpb2_5) | GO:0009405 (pathogenesis); GO:0016020 (membrane)                                                                                                                                                                                                                             | 0.2 | 5.5593198 | Y |
| PFL1370w  | NIMA-related protein kinase, Pfnk-1               | PF00036 (efhand)                                                                                                                                                                     | GO:0004672 (protein kinase activity); GO:0004674 (protein serine/threonine kinase activity); GO:0004713 (protein tyrosine kinase activity); GO:0005524 (ATP binding); GO:0005575 (cellular_component); GO:0006468 (protein amino acid phosphorylation); GO:0007067 (mitosis) | 0.7 | 4.5271361 | Y |
| PF13_0166 | protein kinase, putative                          | PF05191 (ADK_lid)                                                                                                                                                                    | GO:0004672 (protein kinase activity); GO:0004674 (protein serine/threonine kinase activity); GO:0005524 (ATP binding); GO:0006468 (protein amino acid phosphorylation)                                                                                                       | 0.3 | 6.0398829 | Y |
| PF13_0235 | transcription factor with AP2 domain(s), putative | PF00752 (XPG_N); PF00867 (XPG_I); PF01367 (5_3_exonuc)                                                                                                                               | GO:0003700 (transcription factor activity)                                                                                                                                                                                                                                   | 0.5 | 2.1614838 | Y |
| PF13_0258 | serine/threonine protein kinase                   | PF00069 (Pkinase)                                                                                                                                                                    | GO:0004672 (protein kinase activity); GO:0004674 (protein serine/threonine kinase activity); GO:0004713 (protein tyrosine kinase activity); GO:0005524 (ATP binding); GO:0006468 (protein amino acid phosphorylation)                                                        | 0.5 | 5.5221377 | Y |

|             |                                                         |                   |                                                                                                                                                                                                                                                                                                                                                                |     |           |   |
|-------------|---------------------------------------------------------|-------------------|----------------------------------------------------------------------------------------------------------------------------------------------------------------------------------------------------------------------------------------------------------------------------------------------------------------------------------------------------------------|-----|-----------|---|
| MAL13P1.279 | protein kinase 5                                        |                   | GO:0004672 (protein kinase activity); GO:0004674 (protein serine/threonine kinase activity); GO:0004693 (cyclin-dependent protein kinase activity); GO:0004713 (protein tyrosine kinase activity); GO:0005524 (ATP binding); GO:0006468 (protein amino acid phosphorylation); GO:0007049 (cell cycle)                                                          | 0.9 | 3.9863464 | Y |
| PF14_0110   | rhomboid protease ROM8                                  |                   | GO:0016021 (integral to membrane)                                                                                                                                                                                                                                                                                                                              | 0.4 | 0.2491733 | Y |
| PF14_0281   | plasmepsin IX                                           | PF01096 (TFIIS_C) | GO:0004190 (aspartic-type endopeptidase activity); GO:0005575 (cellular_component); GO:0006508 (proteolysis)                                                                                                                                                                                                                                                   | 0.6 | 5.7730288 | Y |
| PF14_0607   | conserved Plasmodium membrane protein, unknown function |                   | GO:0005509 (calcium ion binding); GO:0008150 (biological_process); GO:0020011 (apicoplast)                                                                                                                                                                                                                                                                     | 0.5 | 5.6742069 | Y |
| PF14_0641   | 1-deoxy-D-xylulose 5-phosphate reductoisomerase         |                   | GO:0003824 (catalytic activity); GO:0005488 (binding); GO:0008152 (metabolic process); GO:0008299 (isoprenoid biosynthetic process); GO:0019288 (isopentenyl diphosphate biosynthetic process, mevalonate-independent pathway); GO:0020011 (apicoplast); GO:0030604 (1-deoxy-D-xylulose-5-phosphate reductoisomerase activity); GO:0046872 (metal ion binding) | 0.6 | 4.0571371 |   |
| MAL8P1.69   | 14-3-3 protein, putative                                |                   | GO:0019904 (protein domain specific binding)                                                                                                                                                                                                                                                                                                                   | 0.2 | 4.2728575 |   |
| PF07_0088   | 40S ribosomal protein S5, putative                      |                   | GO:0003735 (structural constituent of ribosome); GO:0005622 (intracellular); GO:0005840 (ribosome); GO:0006412 (translation); GO:0015935 (small ribosomal subunit); GO:0022627 (cytosolic small ribosomal subunit)                                                                                                                                             | 0.2 | 2.5255109 |   |

|            |                                                   |  |                                                                                                                                                                                                                                                                                          |     |           |
|------------|---------------------------------------------------|--|------------------------------------------------------------------------------------------------------------------------------------------------------------------------------------------------------------------------------------------------------------------------------------------|-----|-----------|
| PFI0755c   | 6-phosphofructokinase, putative                   |  | GO:0003824 (catalytic activity); GO:0003872 (6-phosphofructokinase activity); GO:0005524 (ATP binding); GO:0005945 (6-phosphofructokinase complex); GO:0006096 (glycolysis); GO:0008152 (metabolic process); GO:0047334 (diphosphate-fructose-6-phosphate 1-phosphotransferase activity) | 0.2 | 2.4351465 |
| MAL7P1.209 | AAA family ATPase, putative                       |  | GO:0000166 (nucleotide binding); GO:0005524 (ATP binding); GO:0017111 (nucleoside-triphosphatase activity)                                                                                                                                                                               | 0.1 | 2.5852047 |
| PF14_0126  | AAA family ATPase, putative                       |  | GO:0000166 (nucleotide binding); GO:0005524 (ATP binding); GO:0005575 (cellular_component); GO:0008150 (biological_process); GO:0017111 (nucleoside-triphosphatase activity)                                                                                                             | 0.2 | 2.6080727 |
| MAL8P1.144 | AAA family ATPase, putative                       |  | GO:0000166 (nucleotide binding); GO:0005524 (ATP binding); GO:0017111 (nucleoside-triphosphatase activity)                                                                                                                                                                               | 0.5 | 6.2425912 |
| PF13_0271  | ABC transporter, (heavy metal transporter family) |  | GO:0000166 (nucleotide binding); GO:0005524 (ATP binding); GO:0006810 (transport); GO:0016021 (integral to membrane); GO:0016887 (ATPase activity); GO:0017111 (nucleoside-triphosphatase activity); GO:0020011 (apicoplast)                                                             | 0.5 | 1.2144618 |
| PFL2215w   | actin I                                           |  | GO:0005200 (structural constituent of cytoskeleton); GO:0005515 (protein binding); GO:0005884 (actin filament); GO:0007010 (cytoskeleton organization and biogenesis)                                                                                                                    | 0.2 | 5.2401204 |
| PFI0200c   | adapter-related protein, putative                 |  | GO:0005488 (binding); GO:0005515 (protein binding); GO:0006886 (intracellular protein transport); GO:0016192 (vesicle-mediated transport); GO:0030117 (membrane coat)                                                                                                                    | 0.1 | 3.1255194 |

|             |                                                              |                     |                                                                                                                                                                                                                                                                                               |     |           |
|-------------|--------------------------------------------------------------|---------------------|-----------------------------------------------------------------------------------------------------------------------------------------------------------------------------------------------------------------------------------------------------------------------------------------------|-----|-----------|
| PFE1050w    | adenosylhomocysteinase(S-adenosyl-L-homocystein e hydrolase) |                     | GO:0003824 (catalytic activity); GO:0004013 (adenosylhomocysteinase activity); GO:0005488 (binding); GO:0006730 (one-carbon compound metabolic process); GO:0008152 (metabolic process)                                                                                                       | 0.8 | 3.8907745 |
| PF10_0086   | adenylate kinase                                             | PF05756 (S-antigen) | GO:0004017 (adenylate kinase activity); GO:0005524 (ATP binding); GO:0005739 (mitochondrion); GO:0019201 (nucleotide kinase activity)                                                                                                                                                         | 0.6 | 2.969828  |
| PF13_0287   | adenylosuccinate synthetase                                  |                     | GO:0000287 (magnesium ion binding); GO:0004019 (adenylosuccinate synthase activity); GO:0005525 (GTP binding); GO:0006164 (purine nucleotide biosynthetic process); GO:0006167 (AMP biosynthetic process)                                                                                     | 0.8 | 2.7665033 |
| PF13_0354   | alanine--tRNA ligase, putative                               |                     | GO:0000166 (nucleotide binding); GO:0003676 (nucleic acid binding); GO:0004813 (alanine-tRNA ligase activity); GO:0005524 (ATP binding); GO:0005737 (cytoplasm); GO:0006412 (translation); GO:0006419 (alanyl-tRNA aminoacylation); GO:0020011 (apicoplast); GO:0043039 (tRNA aminoacylation) | 0.5 | 2.1228817 |
| MAL13P1.324 | aldo-keto reductase, putative                                | PF00168 (C2)        | GO:0004033 (aldo-keto reductase activity); GO:0008152 (metabolic process); GO:0016491 (oxidoreductase activity); GO:0020011 (apicoplast); GO:0055114 (oxidation reduction)                                                                                                                    | 0.1 | 4.2732069 |
| MAL13P1.390 | aminomethyltransferase, putative                             |                     | GO:0004047 (aminomethyltransferase activity); GO:0005737 (cytoplasm); GO:0006546 (glycine catabolic process)                                                                                                                                                                                  | 0.5 | 3.4248346 |
| PFC0395w    | asparagine synthetase, putative                              |                     | GO:0006529 (asparagine biosynthetic process); GO:0008152 (metabolic process)                                                                                                                                                                                                                  | 0.2 | 2.0720682 |
| PF11_0111   | asparagine-rich antigen                                      |                     | GO:0000166 (nucleotide binding); GO:0003676 (nucleic acid binding)                                                                                                                                                                                                                            | 0.3 | 2.0034643 |

|             |                                                                           |                    |                                                                                                                                                                                                                                                                                                                                            |     |           |
|-------------|---------------------------------------------------------------------------|--------------------|--------------------------------------------------------------------------------------------------------------------------------------------------------------------------------------------------------------------------------------------------------------------------------------------------------------------------------------------|-----|-----------|
| PFL1725w    | ATP synthase beta chain, mitochondrial precursor, putative                | PF08839 (CDT1)     | GO:0000166 (nucleotide binding); GO:0005739 (mitochondrion); GO:0015986 (ATP synthesis coupled proton transport); GO:0015992 (proton transport); GO:0016469 (proton-transporting two-sector ATPase complex); GO:0017111 (nucleoside-triphosphatase activity); GO:0046034 (ATP metabolic process)                                           | 0.7 | 4.0080609 |
| PFB0795w    | ATP synthase F1, alpha subunit, putative                                  |                    | GO:0005739 (mitochondrion); GO:0015986 (ATP synthesis coupled proton transport); GO:0015992 (proton transport); GO:0016469 (proton-transporting two-sector ATPase complex); GO:0046034 (ATP metabolic process)                                                                                                                             | 0.7 | 4.2908134 |
| PF08_0048   | ATP-dependent helicase, putative                                          |                    | GO:0003676 (nucleic acid binding); GO:0003677 (DNA binding); GO:0004386 (helicase activity); GO:0005524 (ATP binding); GO:0008026 (ATP-dependent helicase activity)                                                                                                                                                                        | 0.5 | 2.2249352 |
| PF14_0616   | ATP-dependent protease la, putative                                       |                    | GO:0000166 (nucleotide binding); GO:0004222 (metalloendopeptidase activity); GO:0005524 (ATP binding); GO:0006508 (proteolysis); GO:0008270 (zinc ion binding); GO:0016020 (membrane); GO:0016021 (integral to membrane); GO:0017111 (nucleoside-triphosphatase activity); GO:0020011 (apicoplast); GO:0030163 (protein catabolic process) | 0.2 | 1.5008562 |
| MAL8P1.92   | ATPase, putative                                                          | PF00218 (IGPS)     | GO:0000166 (nucleotide binding); GO:0005524 (ATP binding); GO:0006810 (transport); GO:0016887 (ATPase activity); GO:0017111 (nucleoside-triphosphatase activity)                                                                                                                                                                           | 0.5 | 1.3122554 |
| PFC0160w    | binding protein, putative                                                 |                    | GO:0005515 (protein binding); GO:0008270 (zinc ion binding)                                                                                                                                                                                                                                                                                | 0.1 | 5.1051438 |
| MAL13P1.119 | calcium/calmodulin-dependent 3',5'-cyclic nucleotide phosphodiesterase 1b | PF00643 (zf-B_box) | GO:0003824 (catalytic activity); GO:0004117 (calmodulin-dependent cyclic-nucleotide phosphodiesterase activity); GO:0007165 (signal transduction)                                                                                                                                                                                          | 0.5 | 5.6844682 |

|            |                                                            |                                                                              |                                                                                                                                                                                    |     |           |
|------------|------------------------------------------------------------|------------------------------------------------------------------------------|------------------------------------------------------------------------------------------------------------------------------------------------------------------------------------|-----|-----------|
| PF14_0323  | calmodulin                                                 |                                                                              | GO:0005509 (calcium ion binding); GO:0005575 (cellular_component); GO:0008150 (biological_process); GO:0019899 (enzyme binding)                                                    | 0.5 | 4.375589  |
| PFL1110c   | CAMP-dependent protein kinase regulatory subunit, putative |                                                                              | GO:0001932 (regulation of protein amino acid phosphorylation); GO:0005952 (cAMP-dependent protein kinase complex); GO:0008603 (cAMP-dependent protein kinase regulator activity)   | 0.6 | 5.402931  |
| PF11_0066  | centrin-4                                                  | PF07774 (DUF1620)                                                            | GO:0005200 (structural constituent of cytoskeleton); GO:0005509 (calcium ion binding); GO:0005813 (centrosome); GO:0007067 (mitosis)                                               | 0.5 | 4.4225485 |
| PF13_0062  | clathrin-adaptor medium chain, putative                    | PF02475 (Met_10)                                                             | GO:0005515 (protein binding); GO:0006810 (transport); GO:0006886 (intracellular protein transport); GO:0016192 (vesicle-mediated transport); GO:0030131 (clathrin adaptor complex) | 0.2 | 2.835182  |
| MAL7P1.122 | conserved GTP-binding protein, putative                    | PF04983 (RNA_pol_Rpb1_3); PF04998 (RNA_pol_Rpb1_5); PF05000 (RNA_pol_Rpb1_4) | GO:0005525 (GTP binding); GO:0005622 (intracellular); GO:0007165 (signal transduction)                                                                                             | 0.2 | 2.6270143 |
| PFL1610c   | conserved Plasmodium membrane protein, unknown function    |                                                                              | GO:0003674 (molecular_function); GO:0008150 (biological_process)                                                                                                                   | 0.1 | 1.7387391 |
| PF14_0188  | conserved Plasmodium membrane protein, unknown function    | PF00899 (ThiF); PF02134 (UBACT)                                              | GO:0003674 (molecular_function); GO:0008150 (biological_process)                                                                                                                   | 0.5 | 1.7621564 |
| PF08_0028  | conserved Plasmodium membrane protein, unknown function    | PF04055 (Radical_SAM); PF08608 (Wyosine_form)                                |                                                                                                                                                                                    | 0.1 | 2.0901702 |
| PFC1011c   | conserved Plasmodium membrane protein, unknown function    | PF00004 (AAA)                                                                |                                                                                                                                                                                    | 0.1 | 2.6523704 |
| PF08_0097  | conserved Plasmodium membrane protein, unknown function    |                                                                              | GO:0005215 (transporter activity); GO:0006810 (transport); GO:0016020 (membrane)                                                                                                   | 0.1 | 2.8651143 |
| PF10_0215  | conserved Plasmodium membrane protein, unknown function    | PF01399 (PCI)                                                                | GO:0003674 (molecular_function); GO:0008150 (biological_process)                                                                                                                   | 0.1 | 3.7020636 |
| PF07_0016  | conserved Plasmodium membrane protein, unknown function    | PF01535 (PPR)                                                                |                                                                                                                                                                                    | 0.5 | 4.8173188 |



|             |                                                         |                                                |                                                                                        |     |           |
|-------------|---------------------------------------------------------|------------------------------------------------|----------------------------------------------------------------------------------------|-----|-----------|
| MAL13P1.348 | conserved Plasmodium membrane protein, unknown function | PF01602 (Adaptin_N)                            |                                                                                        | 0.1 | 5.2227315 |
| MAL7P1.17   | conserved Plasmodium membrane protein, unknown function |                                                |                                                                                        | 0.1 | 5.3484236 |
| MAL13P1.38  | conserved Plasmodium membrane protein, unknown function |                                                | GO:0005524 (ATP binding); GO:0006810 (transport); GO:0016021 (integral to membrane)    | 0.1 | 5.5292523 |
| PF13_0078   | conserved Plasmodium membrane protein, unknown function |                                                | GO:0005524 (ATP binding); GO:0006810 (transport); GO:0016021 (integral to membrane)    | 0.5 | 5.6814648 |
| PFL0530c    | conserved Plasmodium protein, unknown function          | PF00012 (HSP70)                                |                                                                                        | 0.3 | 1.0302856 |
| PFF0220w    | conserved Plasmodium protein, unknown function          |                                                |                                                                                        | 0.5 | 1.1710394 |
| PF14_0707   | conserved Plasmodium protein, unknown function          | PF00514 (Arm)                                  |                                                                                        | 0.3 | 1.1912068 |
| PFL1175w    | conserved Plasmodium protein, unknown function          | PF00270 (DEAD); PF00271 (Helicase_C)           | GO:0000166 (nucleotide binding)                                                        | 0.5 | 1.4737744 |
| PFL0405w    | conserved Plasmodium protein, unknown function          | PF05148 (Methyltransf_8)                       | GO:0003674 (molecular_function); GO:0005488 (binding); GO:0008150 (biological_process) | 0.5 | 1.5890376 |
| PFB0375w    | conserved Plasmodium protein, unknown function          | PF00227 (Proteasome); PF10584 (Proteasome_A_N) | GO:0003674 (molecular_function); GO:0008150 (biological_process)                       | 0.5 | 1.5944609 |
| PF13_0184   | conserved Plasmodium protein, unknown function          | PF00005 (ABC_tran)                             | GO:0016020 (membrane)                                                                  | 0.5 | 1.5985582 |
| PF14_0214   | conserved Plasmodium protein, unknown function          |                                                |                                                                                        | 0.5 | 1.6046013 |
| PF14_0515   | conserved Plasmodium protein, unknown function          | PF03144 (GTP_EFTU_D2); PF09173 (eIF2_C)        | GO:0003674 (molecular_function); GO:0008150 (biological_process)                       | 0.1 | 1.6125587 |
| PF14_0550   | conserved Plasmodium protein, unknown function          | PF00083 (Sugar_tr)                             | GO:0005488 (binding)                                                                   | 0.5 | 1.643757  |
| PFD0875c    | conserved Plasmodium protein, unknown function          |                                                |                                                                                        | 0.3 | 1.7783821 |
| PFB0495w    | conserved Plasmodium protein, unknown function          | PF00071 (Ras)                                  |                                                                                        | 0.5 | 1.8740824 |
| PF10_0099   | conserved Plasmodium protein, unknown function          | PF01545 (Cation_efflux)                        |                                                                                        | 0.5 | 1.8801369 |
| MAL13P1.349 | conserved Plasmodium protein, unknown function          | PF00183 (HSP90)                                |                                                                                        | 0.5 | 1.9120729 |
| PFA0275c    | conserved Plasmodium protein, unknown function          | PF02181 (FH2); PF10409 (PTEN_C2)               |                                                                                        | 0.1 | 1.9290443 |

|             |                                                |                                                            |                                                                                                                                                                              |     |           |
|-------------|------------------------------------------------|------------------------------------------------------------|------------------------------------------------------------------------------------------------------------------------------------------------------------------------------|-----|-----------|
| PF11_0123   | conserved Plasmodium protein, unknown function |                                                            |                                                                                                                                                                              | 0.5 | 1.9503512 |
| PF10285w    | conserved Plasmodium protein, unknown function |                                                            | GO:0003677 (DNA binding); GO:0005515 (protein binding); GO:0005634 (nucleus); GO:0006350 (transcription); GO:0030528 (transcription regulator activity)                      | 0.5 | 1.9516252 |
| MAL13P1.323 | conserved Plasmodium protein, unknown function | PF00590 (TP_methylase)                                     |                                                                                                                                                                              | 0.1 | 2.1254606 |
| PF13_0273   | conserved Plasmodium protein, unknown function | PF00130 (C1_1); PF00609 (DAGK_acc); PF00781 (DAGK_cat)     |                                                                                                                                                                              | 0.5 | 2.1652482 |
| PFL1795c    | conserved Plasmodium protein, unknown function | PF00749 (tRNA-synt_1c); PF03950 (tRNA-synt_1c_C)           | GO:0003674 (molecular_function); GO:0008150 (biological_process)                                                                                                             | 0.5 | 2.1879865 |
| PF13_0357   | conserved Plasmodium protein, unknown function |                                                            |                                                                                                                                                                              | 0.1 | 2.1937306 |
| PF14_0657   | conserved Plasmodium protein, unknown function |                                                            | GO:0005622 (intracellular); GO:0008270 (zinc ion binding)                                                                                                                    | 0.5 | 2.2289238 |
| MAL7P1.204  | conserved Plasmodium protein, unknown function | PF00004 (AAA)                                              |                                                                                                                                                                              | 0.3 | 2.2564183 |
| PF14_0023   | conserved Plasmodium protein, unknown function | PF00398 (RrnaAD)                                           | GO:0001522 (pseudouridine synthesis); GO:0003723 (RNA binding); GO:0008150 (biological_process); GO:0009451 (RNA modification); GO:0009982 (pseudouridine synthase activity) | 0.1 | 2.2613529 |
| PF14_0504   | conserved Plasmodium protein, unknown function | PF00112 (Peptidase_C1)                                     |                                                                                                                                                                              | 0.5 | 2.4172135 |
| PF11_0076   | conserved Plasmodium protein, unknown function |                                                            | GO:0003674 (molecular_function); GO:0008150 (biological_process); GO:0020011 (apicoplast)                                                                                    | 0.5 | 2.487774  |
| PFE1015c    | conserved Plasmodium protein, unknown function |                                                            |                                                                                                                                                                              | 0.1 | 2.7269659 |
| MAL13P1.300 | conserved Plasmodium protein, unknown function | PF00004 (AAA); PF01434 (Peptidase_M41); PF06480 (FtsH_ext) | GO:0020011 (apicoplast)                                                                                                                                                      | 0.1 | 2.8461267 |
| PF14_0101   | conserved Plasmodium protein, unknown function |                                                            |                                                                                                                                                                              | 0.5 | 3.0551709 |
| MAL13P1.336 | conserved Plasmodium protein, unknown function |                                                            |                                                                                                                                                                              | 0.3 | 3.082385  |
| PFL1135c    | conserved Plasmodium protein, unknown function | PF04874 (Mak16)                                            | GO:0003674 (molecular_function); GO:0008150 (biological_process)                                                                                                             | 0.5 | 3.1312774 |

|            |                                                |                                      |                                                                                                                                                                                                                            |     |           |
|------------|------------------------------------------------|--------------------------------------|----------------------------------------------------------------------------------------------------------------------------------------------------------------------------------------------------------------------------|-----|-----------|
| PF11_0432  | conserved Plasmodium protein, unknown function | PF06682 (DUF1183); PF06762 (DUF1222) | GO:0003674 (molecular_function); GO:0008150 (biological_process)                                                                                                                                                           | 0.1 | 3.1332056 |
| PFI0795w   | conserved Plasmodium protein, unknown function | PF01529 (zf-DHHC)                    |                                                                                                                                                                                                                            | 0.1 | 3.1812907 |
| PFE0190c   | conserved Plasmodium protein, unknown function | PF00012 (HSP70)                      |                                                                                                                                                                                                                            | 0.3 | 3.2449865 |
| PFE1480c   | conserved Plasmodium protein, unknown function | PF03643 (Vps26)                      |                                                                                                                                                                                                                            | 0.5 | 3.2991176 |
| PF07_0010  | conserved Plasmodium protein, unknown function |                                      |                                                                                                                                                                                                                            | 0.5 | 3.4902708 |
| PF13_0237  | conserved Plasmodium protein, unknown function |                                      |                                                                                                                                                                                                                            | 0.1 | 3.7268268 |
| PFA0550w   | conserved Plasmodium protein, unknown function | PF00270 (DEAD); PF00271 (Helicase_C) |                                                                                                                                                                                                                            | 0.1 | 3.890341  |
| PF13_0200  | conserved Plasmodium protein, unknown function | PF01227 (GTP_cyclohydrol)            |                                                                                                                                                                                                                            | 0.5 | 3.9649216 |
| PF14_0538  | conserved Plasmodium protein, unknown function |                                      |                                                                                                                                                                                                                            | 0.5 | 4.0177885 |
| PF13_0199  | conserved Plasmodium protein, unknown function | PF00008 (EGF)                        |                                                                                                                                                                                                                            | 0.1 | 4.0430487 |
| PF13_0148  | conserved Plasmodium protein, unknown function |                                      | GO:0005576 (extracellular region); GO:0006511 (ubiquitin-dependent protein catabolic process); GO:0009405 (pathogenesis); GO:0031461 (cullin-RING ubiquitin ligase complex); GO:0031625 (ubiquitin protein ligase binding) | 0.5 | 4.0442613 |
| PF14_0268  | conserved Plasmodium protein, unknown function | PF00118 (Cpn60_TCP1)                 |                                                                                                                                                                                                                            | 0.3 | 4.0714226 |
| PFI0830c   | conserved Plasmodium protein, unknown function | PF01590 (GAF); PF10507 (DUF2453)     | GO:0005488 (binding)                                                                                                                                                                                                       | 0.1 | 4.1801703 |
| PF07_0042  | conserved Plasmodium protein, unknown function | PF00008 (EGF); PF07462 (MSP1_C)      | GO:0003677 (DNA binding)                                                                                                                                                                                                   | 0.5 | 4.2099447 |
| MAL8P1.53  | conserved Plasmodium protein, unknown function | PF00069 (Pkinase)                    |                                                                                                                                                                                                                            | 0.1 | 4.4433805 |
| PFE0235c   | conserved Plasmodium protein, unknown function |                                      | GO:0016740 (transferase activity)                                                                                                                                                                                          | 0.5 | 4.5197427 |
| MAL7P1.203 | conserved Plasmodium protein, unknown function | PF00071 (Ras)                        | GO:0005634 (nucleus)                                                                                                                                                                                                       | 0.5 | 4.5462795 |
| PFI0565w   | conserved Plasmodium protein, unknown function | PF00071 (Ras)                        |                                                                                                                                                                                                                            | 0.4 | 4.556311  |

|             |                                                |                                             |                                                                                           |     |           |
|-------------|------------------------------------------------|---------------------------------------------|-------------------------------------------------------------------------------------------|-----|-----------|
| MAL7P1.30   | conserved Plasmodium protein, unknown function |                                             |                                                                                           | 0.5 | 4.5952672 |
| MAL8P1.84   | conserved Plasmodium protein, unknown function | PF01926 (MMR_HSR1); PF06071 (YchF-GTPase_C) |                                                                                           | 0.3 | 4.6511625 |
| PFF0545c    | conserved Plasmodium protein, unknown function |                                             |                                                                                           | 0.1 | 4.7047789 |
| PF14_0405   | conserved Plasmodium protein, unknown function | PF00867 (XPG_I)                             |                                                                                           | 0.5 | 4.7282178 |
| PFI0395w    | conserved Plasmodium protein, unknown function |                                             |                                                                                           | 0.5 | 5.0210918 |
| PF11_0354   | conserved Plasmodium protein, unknown function |                                             |                                                                                           | 0.5 | 5.0928319 |
| MAL13P1.29  | conserved Plasmodium protein, unknown function | PF00076 (RRM_1)                             | GO:0005524 (ATP binding); GO:0006810 (transport); GO:0016021 (integral to membrane)       | 0.5 | 5.2370775 |
| PF14_0383   | conserved Plasmodium protein, unknown function | PF00310 (GATase_2); PF00733 (Asn_synthase)  | GO:0005622 (intracellular); GO:0008270 (zinc ion binding)                                 | 0.1 | 5.2860093 |
| PFF0570c    | conserved Plasmodium protein, unknown function | PF05024 (Gpi1)                              | GO:0005524 (ATP binding); GO:0006810 (transport); GO:0016021 (integral to membrane)       | 0.1 | 5.2866439 |
| PF11_0158   | conserved Plasmodium protein, unknown function |                                             |                                                                                           | 0.5 | 5.2935551 |
| PFC0345w    | conserved Plasmodium protein, unknown function | PF00012 (HSP70)                             | GO:0005622 (intracellular); GO:0008270 (zinc ion binding)                                 | 0.5 | 5.3377125 |
| PF10_0184   | conserved Plasmodium protein, unknown function |                                             |                                                                                           | 0.5 | 5.3593444 |
| PF07_0021   | conserved Plasmodium protein, unknown function | PF01529 (zf-DHHC)                           |                                                                                           | 0.1 | 5.408591  |
| PFI1210w    | conserved Plasmodium protein, unknown function |                                             |                                                                                           | 0.5 | 5.4524731 |
| PF11_0304   | conserved Plasmodium protein, unknown function |                                             | GO:0003674 (molecular_function); GO:0008150 (biological_process); GO:0020011 (apicoplast) | 0.5 | 5.548189  |
| PFL0315c    | conserved Plasmodium protein, unknown function | PF10453 (NUFIP1)                            |                                                                                           | 0.5 | 5.5673433 |
| PF10_0135   | conserved Plasmodium protein, unknown function | PF00928 (Adap_comp_sub)                     | GO:0003674 (molecular_function); GO:0008150 (biological_process)                          | 0.3 | 5.5739371 |
| MAL13P1.380 | conserved Plasmodium protein, unknown function | PF06487 (SAP18)                             |                                                                                           | 0.5 | 5.6909583 |
| PF11_0107   | conserved Plasmodium protein, unknown function |                                             | GO:0003674 (molecular_function); GO:0008150 (biological_process)                          | 0.1 | 5.7145864 |

|             |                                                |                                                 |                                                                                                                                                                                                                                                                  |     |           |
|-------------|------------------------------------------------|-------------------------------------------------|------------------------------------------------------------------------------------------------------------------------------------------------------------------------------------------------------------------------------------------------------------------|-----|-----------|
| PFD1100c    | conserved Plasmodium protein, unknown function | PF03144 (GTP_EFTU_D2);<br>PF03764 (EFG_IV)      | GO:0020011 (apicoplast)                                                                                                                                                                                                                                          | 0.3 | 5.7206385 |
| PF14_0337   | conserved Plasmodium protein, unknown function | PF00149 (Metallophos)                           |                                                                                                                                                                                                                                                                  | 0.5 | 5.8082873 |
| PFC0820w    | conserved Plasmodium protein, unknown function | PF03143 (GTP_EFTU_D3);<br>PF03144 (GTP_EFTU_D2) | GO:0005488 (binding)                                                                                                                                                                                                                                             | 0.5 | 5.8606395 |
| PFD0885c    | conserved Plasmodium protein, unknown function | PF00071 (Ras)                                   |                                                                                                                                                                                                                                                                  | 0.5 | 5.9228394 |
| PF11_0277   | conserved Plasmodium protein, unknown function |                                                 |                                                                                                                                                                                                                                                                  | 0.1 | 5.9303492 |
| PF08_0035   | conserved Plasmodium protein, unknown function |                                                 |                                                                                                                                                                                                                                                                  | 0.1 | 5.9880096 |
| MAL13P1.260 | conserved Plasmodium protein, unknown function |                                                 |                                                                                                                                                                                                                                                                  | 0.5 | 6.0320441 |
| PFL0470w    | conserved Plasmodium protein, unknown function | PF01694 (Rhomboid)                              |                                                                                                                                                                                                                                                                  | 0.5 | 6.1932188 |
| PFE1240w    | conserved protein, unknown function            |                                                 | GO:0003824 (catalytic activity); GO:0051536 (iron-sulfur cluster binding)                                                                                                                                                                                        | 0.1 | 1.8546544 |
| MAL8P1.105  | conserved protein, unknown function            |                                                 |                                                                                                                                                                                                                                                                  | 0.1 | 2.3618461 |
| PF14_0597   | cytochrome c1 precursor, putative              |                                                 | GO:0005506 (iron ion binding); GO:0005750 (mitochondrial respiratory chain complex III); GO:0009055 (electron carrier activity); GO:0020037 (heme binding)                                                                                                       | 0.2 | 4.5500239 |
| PFD0311w    | cytosolic glyoxalase II                        |                                                 | GO:0004416 (hydroxyacylglutathione hydrolase activity); GO:0006089 (lactate metabolic process); GO:0008270 (zinc ion binding); GO:0016787 (hydrolase activity)                                                                                                   | 0.8 | 2.8112782 |
| PFL2010c    | DEAD/DEAH box helicase, putative               |                                                 | GO:0003676 (nucleic acid binding); GO:0004004 (ATP-dependent RNA helicase activity); GO:0004386 (helicase activity); GO:0005524 (ATP binding); GO:0005575 (cellular_component); GO:0008026 (ATP-dependent helicase activity); GO:0016070 (RNA metabolic process) | 0.3 | 1.6045349 |
| PF14_0125   | deoxyhypusine synthase                         | PF07665 (MpPF2)                                 | GO:0006412 (translation); GO:0008612 (peptidyl-lysine modification to hypusine); GO:0050983 (spermidine catabolic process to deoxyhypusine, using deoxyhypusine synthase)                                                                                        | 0.8 | 1.8463864 |

|             |                                                            |               |                                                                                                                                                                                                                                    |     |           |
|-------------|------------------------------------------------------------|---------------|------------------------------------------------------------------------------------------------------------------------------------------------------------------------------------------------------------------------------------|-----|-----------|
| PF11_0282   | deoxyuridine 5'-triphosphate nucleotidohydrolase, putative |               | GO:0004170 (dUTP diphosphatase activity); GO:0005575 (cellular_component); GO:0006260 (DNA replication); GO:0006399 (tRNA metabolic process); GO:0016787 (hydrolase activity); GO:0046080 (dUTP metabolic process)                 | 0.6 | 3.9044221 |
| MAL13P1.126 | DHHC-type zinc finger protein, putative                    |               | GO:0005524 (ATP binding); GO:0006810 (transport); GO:0008270 (zinc ion binding); GO:0016020 (membrane); GO:0016021 (integral to membrane)                                                                                          | 0.1 | 5.2677764 |
| PF11485c    | diacylglycerol kinase, putative                            |               | GO:0004143 (diacylglycerol kinase activity); GO:0007205 (activation of protein kinase C activity); GO:0007242 (intracellular signaling cascade); GO:0020011 (apicoplast)                                                           | 0.4 | 6.0645611 |
| PF14_0156   | dimethyladenosine transferase, putative                    |               | GO:0000154 (rRNA modification); GO:0006364 (rRNA processing); GO:0008649 (rRNA methyltransferase activity)                                                                                                                         | 0.2 | 1.8316609 |
| PF10_0087   | diphthine synthase                                         |               | GO:0004164 (diphthine synthase activity); GO:0005575 (cellular_component); GO:0008152 (metabolic process); GO:0008168 (methyltransferase activity); GO:0017183 (peptidyl-diphthamide biosynthetic process from peptidyl-histidine) | 0.2 | 1.5050605 |
| PFD0590c    | DNA polymerase alpha                                       | PF02213 (GYF) | GO:0000166 (nucleotide binding); GO:0003676 (nucleic acid binding); GO:0003677 (DNA binding); GO:0003887 (DNA-directed DNA polymerase activity); GO:0005634 (nucleus); GO:0006260 (DNA replication)                                | 0.8 | 4.3158593 |

|           |                                                                 |                 |                                                                                                                                                                                                                                                                                                                               |     |           |
|-----------|-----------------------------------------------------------------|-----------------|-------------------------------------------------------------------------------------------------------------------------------------------------------------------------------------------------------------------------------------------------------------------------------------------------------------------------------|-----|-----------|
| PF10_0165 | DNA polymerase delta catalytic subunit                          |                 | GO:0000166 (nucleotide binding); GO:0003676 (nucleic acid binding); GO:0003677 (DNA binding); GO:0003887 (DNA-directed DNA polymerase activity); GO:0005634 (nucleus); GO:0006260 (DNA replication); GO:0008310 (single-stranded DNA specific 3'-5' exodeoxyribonuclease activity); GO:0043625 (delta DNA polymerase complex) | 0.8 | 3.8838987 |
| PFF1470c  | DNA polymerase epsilon, catalytic subunit a, putative           |                 | GO:0000166 (nucleotide binding); GO:0003676 (nucleic acid binding); GO:0003677 (DNA binding); GO:0003887 (DNA-directed DNA polymerase activity); GO:0006260 (DNA replication); GO:0006261 (DNA-dependent DNA replication); GO:0008270 (zinc ion binding); GO:0008622 (epsilon DNA polymerase complex)                         | 0.5 | 3.9906662 |
| PF14_0639 | DNA-3-methyladenine glycosylase, putative                       |                 | GO:0003677 (DNA binding); GO:0003824 (catalytic activity); GO:0003905 (alkylbase DNA N-glycosylase activity); GO:0005575 (cellular_component); GO:0006284 (base-excision repair)                                                                                                                                              | 0.3 | 2.0742087 |
| PFB0715w  | DNA-directed RNA polymerase II second largest subunit, putative |                 | GO:0003677 (DNA binding); GO:0003899 (DNA-directed RNA polymerase activity); GO:0005665 (DNA-directed RNA polymerase II, core complex); GO:0006350 (transcription); GO:0006366 (transcription from RNA polymerase II promoter)                                                                                                | 0.8 | 2.4074974 |
| PFL0330c  | DNA-directed RNA polymerase III subunit, putative               | PF08711 (TFIIS) | GO:0003677 (DNA binding); GO:0003899 (DNA-directed RNA polymerase activity); GO:0005666 (DNA-directed RNA polymerase III complex); GO:0006350 (transcription); GO:0006383 (transcription from RNA polymerase III promoter)                                                                                                    | 0.5 | 1.7041893 |
| PF08_0032 | DNAJ protein, putative                                          |                 | GO:0006457 (protein folding); GO:0031072 (heat shock protein binding); GO:0051082 (unfolded protein binding)                                                                                                                                                                                                                  | 0.1 | 3.4830016 |
| PFI0315c  | dynein light intermediate chain 2, cytosolic                    |                 | GO:0003774 (motor activity)                                                                                                                                                                                                                                                                                                   | 0.5 | 1.0635295 |

|             |                                                                       |  |                                                                                                                                                                                                                   |     |           |
|-------------|-----------------------------------------------------------------------|--|-------------------------------------------------------------------------------------------------------------------------------------------------------------------------------------------------------------------|-----|-----------|
| PF14_0486   | elongation factor 2                                                   |  | GO:0003746 (translation elongation factor activity);<br>GO:0003924 (GTPase activity); GO:0005525 (GTP binding);<br>GO:0005575 (cellular_component); GO:0006414 (translational<br>elongation)                      | 0.2 | 2.5650101 |
| MAL13P1.164 | elongation factor Tu, putative                                        |  | GO:0003746 (translation elongation factor activity);<br>GO:0003924 (GTPase activity); GO:0005525 (GTP binding);<br>GO:0005622 (intracellular); GO:0006414 (translational<br>elongation)                           | 0.2 | 3.8768026 |
| PF10_0080   | endonuclease, putative                                                |  | GO:0003677 (DNA binding); GO:0003824 (catalytic activity);<br>GO:0004518 (nuclease activity); GO:0005739 (mitochondrion);<br>GO:0006281 (DNA repair)                                                              | 0.3 | 4.8319018 |
| MAL7P1.12   | erythrocyte membrane-associated antigen                               |  | GO:0016020 (membrane)                                                                                                                                                                                             | 0.1 | 2.4878486 |
| PF14_0104   | eukaryotic translation initiation factor 2 gamma<br>subunit, putative |  | GO:0003924 (GTPase activity); GO:0005525 (GTP binding);<br>GO:0005850 (eukaryotic translation initiation factor 2<br>complex); GO:0006413 (translational initiation)                                              | 0.2 | 2.3786858 |
| PFE1405c    | eukaryotic translation initiation factor 3, subunit 6,<br>putative    |  | GO:0003677 (DNA binding)                                                                                                                                                                                          | 0.1 | 2.1976977 |
| PFL2275c    | FK506-binding protein (FKBP)-type peptidyl-propyl<br>isomerase        |  | GO:0003755 (peptidyl-prolyl cis-trans isomerase activity);<br>GO:0005488 (binding); GO:0005528 (FK506 binding);<br>GO:0005575 (cellular_component); GO:0006457 (protein<br>folding)                               | 0.6 | 3.0188449 |
| PFD0420c    | flap endonuclease 1                                                   |  | GO:0003677 (DNA binding); GO:0003824 (catalytic activity);<br>GO:0004518 (nuclease activity); GO:0004520<br>(endodeoxyribonuclease activity); GO:0006281 (DNA repair);<br>GO:0008409 (5'-3' exonuclease activity) | 0.8 | 4.3941724 |



|           |                                        |  |                                                                                                                                                                                                                                                                                                              |     |           |
|-----------|----------------------------------------|--|--------------------------------------------------------------------------------------------------------------------------------------------------------------------------------------------------------------------------------------------------------------------------------------------------------------|-----|-----------|
| PFL0925w  | formin 2, putative                     |  | GO:0000910 (cytokinesis); GO:0003779 (actin binding); GO:0005575 (cellular_component); GO:0016043 (cellular component organization and biogenesis); GO:0030036 (actin cytoskeleton organization and biogenesis)                                                                                              | 0.1 | 4.5540415 |
| PFI0380c  | formylmethionine deformylase, putative |  | GO:0005506 (iron ion binding); GO:0006412 (translation); GO:0020011 (apicoplast); GO:0042586 (peptide deformylase activity)                                                                                                                                                                                  | 0.8 | 3.2841281 |
| PFB0510w  | GAF domain-related protein, putative   |  | GO:0003674 (molecular_function); GO:0008150 (biological_process)                                                                                                                                                                                                                                             | 0.1 | 5.267956  |
| PFI0925w  | gamma-glutamylcysteine synthetase      |  | GO:0004357 (glutamate-cysteine ligase activity); GO:0006750 (glutathione biosynthetic process)                                                                                                                                                                                                               | 0.6 | 2.1451004 |
| PF13_0257 | glutamate--tRNA ligase, putative       |  | GO:0000166 (nucleotide binding); GO:0004812 (aminoacyl-tRNA ligase activity); GO:0004818 (glutamate-tRNA ligase activity); GO:0005524 (ATP binding); GO:0005737 (cytoplasm); GO:0006412 (translation); GO:0006418 (tRNA aminoacylation for protein translation); GO:0006424 (glutamyl-tRNA aminoacylation)   | 0.3 | 1.9315084 |
| PF13_0170 | glutaminyl-tRNA synthetase, putative   |  | GO:0000166 (nucleotide binding); GO:0004812 (aminoacyl-tRNA ligase activity); GO:0004819 (glutamine-tRNA ligase activity); GO:0005524 (ATP binding); GO:0005737 (cytoplasm); GO:0006412 (translation); GO:0006418 (tRNA aminoacylation for protein translation); GO:0006425 (glutaminyl-tRNA aminoacylation) | 0.8 | 2.1899936 |
| PF10_0123 | GMP synthetase                         |  | GO:0003824 (catalytic activity); GO:0003921 (GMP synthase activity); GO:0005524 (ATP binding); GO:0005575 (cellular_component); GO:0006164 (purine nucleotide biosynthetic process); GO:0006177 (GMP biosynthetic process)                                                                                   | 0.6 | 1.9660071 |

|           |                                         |                |                                                                                                                                                                                                                                                                        |     |           |
|-----------|-----------------------------------------|----------------|------------------------------------------------------------------------------------------------------------------------------------------------------------------------------------------------------------------------------------------------------------------------|-----|-----------|
| PFL1155w  | GTP cyclohydrolase I                    |                | GO:0006730 (one-carbon compound metabolic process);<br>GO:0009396 (folic acid and derivative biosynthetic process)                                                                                                                                                     | 0.3 | 3.1690009 |
| PFL2415w  | Hbeta58/Vps26 protein homolog, putative | PF00400 (WD40) | GO:0003674 (molecular_function); GO:0007034 (vacuolar transport); GO:0030904 (retromer complex); GO:0042147 (retrograde transport, endosome to Golgi)                                                                                                                  | 0.2 | 4.1735934 |
| PF08_0054 | heat shock 70 kDa protein               |                | GO:0005524 (ATP binding); GO:0006986 (response to unfolded protein); GO:0009408 (response to heat)                                                                                                                                                                     | 0.2 | 2.5875201 |
| PF10_0153 | heat shock protein 60                   |                | GO:0005515 (protein binding); GO:0005524 (ATP binding); GO:0005739 (mitochondrion); GO:0006626 (protein targeting to mitochondrion); GO:0006986 (response to unfolded protein); GO:0042623 (ATPase activity, coupled); GO:0044267 (cellular protein metabolic process) | 0.2 | 3.1144282 |
| PFI0875w  | Heat shock protein 70 (HSP70) homologue |                | GO:0005524 (ATP binding)                                                                                                                                                                                                                                               | 0.2 | 3.8329496 |
| PF11_0351 | heat shock protein hsp70 homologue      |                | GO:0005524 (ATP binding); GO:0005575 (cellular_component); GO:0006457 (protein folding); GO:0006986 (response to unfolded protein); GO:0009408 (response to heat); GO:0051082 (unfolded protein binding)                                                               | 0.2 | 2.8938506 |
| PFF1155w  | hexokinase                              | PF08514 (STAG) | GO:0005524 (ATP binding); GO:0005575 (cellular_component); GO:0005975 (carbohydrate metabolic process)                                                                                                                                                                 | 0.6 | 2.9501507 |
| PF14_0417 | HSP90                                   | PF00400 (WD40) | GO:0005524 (ATP binding); GO:0009408 (response to heat); GO:0020011 (apicoplast); GO:0042623 (ATPase activity, coupled)                                                                                                                                                | 0.3 | 3.4654461 |

|             |                                                |                                            |                                                                                                                                                                                                                                                                                                                                             |     |           |
|-------------|------------------------------------------------|--------------------------------------------|---------------------------------------------------------------------------------------------------------------------------------------------------------------------------------------------------------------------------------------------------------------------------------------------------------------------------------------------|-----|-----------|
| PF08_0087   | importin alpha, putative                       | PF00069 (Pkinase)                          | GO:0005488 (binding); GO:0005634 (nucleus); GO:0005643 (nuclear pore); GO:0005737 (cytoplasm); GO:0006606 (protein import into nucleus); GO:0006607 (NLS-bearing substrate import into nucleus); GO:0006886 (intracellular protein transport); GO:0008565 (protein transporter activity)                                                    | 0.2 | 3.1816383 |
| MAL13P1.319 | indole-3-glycerol-phosphate synthase, putative | PF05783 (DLIC)                             | GO:0003824 (catalytic activity); GO:0008152 (metabolic process)                                                                                                                                                                                                                                                                             | 0.1 | 3.854046  |
| PFF0645c    | integral membrane protein, putative            | PF00069 (Pkinase)                          | GO:0005524 (ATP binding); GO:0006810 (transport); GO:0016021 (integral to membrane)                                                                                                                                                                                                                                                         | 0.1 | 5.7610513 |
| PF13_0179   | isoleucine - tRNA ligase, putative             | PF00005 (ABC_tran); PF00664 (ABC_membrane) | GO:0000166 (nucleotide binding); GO:0004812 (aminoacyl-tRNA ligase activity); GO:0004822 (isoleucine-tRNA ligase activity); GO:0005524 (ATP binding); GO:0005737 (cytoplasm); GO:0006412 (translation); GO:0006418 (tRNA aminoacylation for protein translation); GO:0006428 (isoleucyl-tRNA aminoacylation); GO:0008270 (zinc ion binding) | 0.7 | 2.6326826 |
| PF08_0011   | leucine - tRNA ligase                          | PF02493 (MORN)                             | GO:0000166 (nucleotide binding); GO:0004812 (aminoacyl-tRNA ligase activity); GO:0004823 (leucine-tRNA ligase activity); GO:0005524 (ATP binding); GO:0005737 (cytoplasm); GO:0006412 (translation); GO:0006418 (tRNA aminoacylation for protein translation); GO:0006429 (leucyl-tRNA aminoacylation); GO:0020011 (apicoplast)             | 0.5 | 3.0900292 |
| PFF1095w    | leucyl tRNA synthase                           | PF00004 (AAA)                              | GO:0000166 (nucleotide binding); GO:0004812 (aminoacyl-tRNA ligase activity); GO:0004823 (leucine-tRNA ligase activity); GO:0005524 (ATP binding); GO:0005737 (cytoplasm); GO:0006412 (translation); GO:0006418 (tRNA aminoacylation for protein translation); GO:0006429 (leucyl-tRNA aminoacylation)                                      | 0.7 | 2.4118473 |

|            |                                     |                                           |                                                                                                                                                                                                                                                                                                                                                                                          |     |           |
|------------|-------------------------------------|-------------------------------------------|------------------------------------------------------------------------------------------------------------------------------------------------------------------------------------------------------------------------------------------------------------------------------------------------------------------------------------------------------------------------------------------|-----|-----------|
| PFL1550w   | lipoamide dehydrogenase             |                                           | GO:0004148 (dihydrolipoyl dehydrogenase activity);<br>GO:0005737 (cytoplasm); GO:0005759 (mitochondrial matrix);<br>GO:0016491 (oxidoreductase activity); GO:0045454 (cell redox<br>homeostasis); GO:0050660 (FAD binding)                                                                                                                                                               | 0.3 | 3.5103738 |
| PFI1570c   | M18 aspartyl aminopeptidase         |                                           | GO:0004177 (aminopeptidase activity); GO:0005773 (vacuole);<br>GO:0006508 (proteolysis); GO:0008270 (zinc ion binding)                                                                                                                                                                                                                                                                   | 0.6 | 2.7457424 |
| PFF0895w   | malate dehydrogenase                |                                           | GO:0003824 (catalytic activity); GO:0005488 (binding);<br>GO:0005739 (mitochondrion); GO:0005975 (carbohydrate<br>metabolic process); GO:0006096 (glycolysis); GO:0006099<br>(tricarboxylic acid cycle); GO:0008152 (metabolic process);<br>GO:0016491 (oxidoreductase activity); GO:0016615 (malate<br>dehydrogenase activity); GO:0044262 (cellular carbohydrate<br>metabolic process) | 0.8 | 5.0497884 |
| PFF0995c   | Merozoite surface protein 10, MSP10 | PF08241 (Methyltransf_11)                 |                                                                                                                                                                                                                                                                                                                                                                                          | 0.1 | 5.8929058 |
| PFI0700c   | met-10+ like protein, putative      |                                           | GO:0020011 (apicoplast)                                                                                                                                                                                                                                                                                                                                                                  | 0.1 | 1.0590471 |
| PF10_0150  | methionine aminopeptidase, putative | PF01189 (Nol1_Nop2_Fmu)                   | GO:0004177 (aminopeptidase activity); GO:0005575<br>(cellular_component); GO:0006417 (regulation of translation);<br>GO:0006464 (protein modification process); GO:0006508<br>(proteolysis); GO:0008235 (metalloexopeptidase activity);<br>GO:0009987 (cellular process)                                                                                                                 | 0.8 | 2.0802669 |
| PFI1235w   | methyltransferase, putative         | PF00847 (AP2)                             |                                                                                                                                                                                                                                                                                                                                                                                          | 0.3 | 1.4965241 |
| PF08_0092  | methyltransferase, putative         | PF07973 (tRNA_SAD)                        |                                                                                                                                                                                                                                                                                                                                                                                          | 0.1 | 1.6463629 |
| PF07_0020  | methyltransferase, putative         | PF00847 (AP2)                             | GO:0008152 (metabolic process); GO:0008168<br>(methyltransferase activity)                                                                                                                                                                                                                                                                                                               | 0.5 | 1.8118316 |
| PF07_0015  | methyltransferase, putative         |                                           |                                                                                                                                                                                                                                                                                                                                                                                          | 0.5 | 2.008191  |
| MAL13P1.32 | MORN repeat protein, putative       | PF00176 (SNF2_N); PF00271<br>(Helicase_C) |                                                                                                                                                                                                                                                                                                                                                                                          | 0.5 | 1.2378271 |

|            |                                                   |                                              |                                                                                                                                                                                                                                                                                                                |     |           |
|------------|---------------------------------------------------|----------------------------------------------|----------------------------------------------------------------------------------------------------------------------------------------------------------------------------------------------------------------------------------------------------------------------------------------------------------------|-----|-----------|
| PFE1150w   | multidrug resistance protein                      | PF00849 (PseudoU_synth_2)                    | GO:0000166 (nucleotide binding); GO:0005524 (ATP binding); GO:0006810 (transport); GO:0016021 (integral to membrane); GO:0016887 (ATPase activity); GO:0017111 (nucleoside-triphosphatase activity); GO:0042493 (response to drug)                                                                             | 0.7 | 0.9188501 |
| PFF0675c   | myosin E                                          | PF00133 (tRNA-synt_1)                        | GO:0003774 (motor activity); GO:0003779 (actin binding); GO:0005524 (ATP binding); GO:0016459 (myosin complex)                                                                                                                                                                                                 | 0.1 | 5.943398  |
| PFF0915w   | N-acetylglucosamine transferase                   | PF01571 (GCV_T)                              | GO:0006506 (GPI anchor biosynthetic process); GO:0016021 (integral to membrane); GO:0017176 (phosphatidylinositol N-acetylglucosaminyltransferase activity)                                                                                                                                                    | 0.1 | 4.7772398 |
| PFF0785w   | Ndc80 homologue, putative                         | PF00136 (DNA_pol_B); PF03104 (DNA_pol_B_exo) | GO:0005515 (protein binding); GO:0016020 (membrane); GO:0016192 (vesicle-mediated transport)                                                                                                                                                                                                                   | 0.5 | 4.507689  |
| PFB0175c   | nucleolar preribosomal assembly protein, putative | PF00036 (efhand)                             |                                                                                                                                                                                                                                                                                                                | 0.3 | 1.5466582 |
| PF13_0349  | nucleoside diphosphate kinase b, putative         | PF00069 (Pkinase)                            | GO:0004550 (nucleoside diphosphate kinase activity); GO:0005524 (ATP binding); GO:0006183 (GTP biosynthetic process); GO:0006228 (UTP biosynthetic process); GO:0006241 (CTP biosynthetic process)                                                                                                             | 0.2 | 3.9566428 |
| PFL1605w   | pentatricopeptide repeat protein, putative        | PF03801 (Ndc80_HEC)                          |                                                                                                                                                                                                                                                                                                                | 0.1 | 3.3555353 |
| MAL13P1.19 | peptidase, putative                               | PF00069 (Pkinase); PF07714 (Pkinase_Tyr)     | GO:0005086 (ARF guanyl-nucleotide exchange factor activity); GO:0005488 (binding); GO:0005622 (intracellular); GO:0032012 (regulation of ARF protein signal transduction)                                                                                                                                      | 0.5 | 3.9657481 |
| PF11_0225  | PfGCN20                                           |                                              | GO:0000166 (nucleotide binding); GO:0005524 (ATP binding); GO:0006417 (regulation of translation); GO:0006810 (transport); GO:0016020 (membrane); GO:0016887 (ATPase activity); GO:0017111 (nucleoside-triphosphatase activity); GO:0042626 (ATPase activity, coupled to transmembrane movement of substances) | 0.4 | 1.8474668 |

|           |                         |                                    |                                                                                                                                                                                                                                                                                                                                                                  |     |           |
|-----------|-------------------------|------------------------------------|------------------------------------------------------------------------------------------------------------------------------------------------------------------------------------------------------------------------------------------------------------------------------------------------------------------------------------------------------------------|-----|-----------|
| PF08_0110 | PfRab18, GTPase         | PF00069 (Pkinase)                  | GO:0003924 (GTPase activity); GO:0005515 (protein binding); GO:0005525 (GTP binding); GO:0005622 (intracellular); GO:0006886 (intracellular protein transport); GO:0006913 (nucleocytoplasmic transport); GO:0007165 (signal transduction); GO:0007264 (small GTPase mediated signal transduction); GO:0015031 (protein transport)                               | 0.2 | 3.2621681 |
| PFE0690c  | PfRab1a                 | PF00069 (Pkinase); PF00536 (SAM_1) | GO:0003924 (GTPase activity); GO:0005515 (protein binding); GO:0005525 (GTP binding); GO:0005622 (intracellular); GO:0006886 (intracellular protein transport); GO:0006913 (nucleocytoplasmic transport); GO:0007165 (signal transduction); GO:0007264 (small GTPase mediated signal transduction); GO:0015031 (protein transport)                               | 0.2 | 3.9469485 |
| PF11_0461 | PfRab6, GTPase          |                                    | GO:0003924 (GTPase activity); GO:0005515 (protein binding); GO:0005525 (GTP binding); GO:0005622 (intracellular); GO:0005794 (Golgi apparatus); GO:0006886 (intracellular protein transport); GO:0006913 (nucleocytoplasmic transport); GO:0007165 (signal transduction); GO:0007264 (small GTPase mediated signal transduction); GO:0015031 (protein transport) | 0.2 | 4.8525855 |
| PF10155c  | PfRab7, GTPase          |                                    | GO:0003924 (GTPase activity); GO:0005515 (protein binding); GO:0005525 (GTP binding); GO:0005622 (intracellular); GO:0006886 (intracellular protein transport); GO:0006913 (nucleocytoplasmic transport); GO:0007165 (signal transduction); GO:0007264 (small GTPase mediated signal transduction); GO:0015031 (protein transport)                               | 0.2 | 3.805761  |
| PF11105w  | phosphoglycerate kinase | PF00004 (AAA)                      | GO:0004618 (phosphoglycerate kinase activity); GO:0006096 (glycolysis)                                                                                                                                                                                                                                                                                           | 0.8 | 2.8979751 |

|             |                                                     |                                                    |                                                                                                                                                                                                                                                               |     |           |
|-------------|-----------------------------------------------------|----------------------------------------------------|---------------------------------------------------------------------------------------------------------------------------------------------------------------------------------------------------------------------------------------------------------------|-----|-----------|
| MAL13P1.270 | proteasome subunit, putative                        |                                                    | GO:0004175 (endopeptidase activity); GO:0004298 (threonine endopeptidase activity); GO:0005839 (proteasome core complex); GO:0006511 (ubiquitin-dependent protein catabolic process); GO:0051603 (proteolysis involved in cellular protein catabolic process) | 0.2 | 3.3121615 |
| PF11_0220   | protein kinase                                      |                                                    | GO:0004672 (protein kinase activity); GO:0004674 (protein serine/threonine kinase activity); GO:0004713 (protein tyrosine kinase activity); GO:0005524 (ATP binding); GO:0006468 (protein amino acid phosphorylation)                                         | 0.5 | 4.9535483 |
| PF14_0492   | protein phosphatase 2b regulatory subunit, putative | PF01564 (Spermine_synth)                           | GO:0005509 (calcium ion binding); GO:0005955 (calcineurin complex); GO:0006470 (protein amino acid dephosphorylation); GO:0008597 (calcium-dependent protein serine/threonine phosphatase regulator activity)                                                 | 0.9 | 5.2159471 |
| PFF1300w    | pyruvate kinase                                     | PF00254 (FKBP_C); PF00515 (TPR_1)                  | GO:0000287 (magnesium ion binding); GO:0003824 (catalytic activity); GO:0004743 (pyruvate kinase activity); GO:0006096 (glycolysis); GO:0030955 (potassium ion binding)                                                                                       | 0.2 | 2.9477631 |
| PF14_0300   | Qa-SNARE protein, putative                          | PF00692 (dUTPase)                                  | GO:0003674 (molecular_function); GO:0005515 (protein binding); GO:0008150 (biological_process); GO:0016020 (membrane); GO:0016192 (vesicle-mediated transport)                                                                                                | 0.3 | 3.5945339 |
| PFL2030w    | queuine tRNA-ribosyltransferase, putative           | PF02670 (DXP_reductoisom); PF08436 (DXP_redisom_C) | GO:0006400 (tRNA modification); GO:0008479 (queuine tRNA-ribosyltransferase activity); GO:0008616 (queuosine biosynthetic process); GO:0020011 (apicoplast)                                                                                                   | 0.6 | 2.8001675 |

|             |                                                           |                                                                      |                                                                                                                                                                                                                                                                                                                                                                                                        |     |           |
|-------------|-----------------------------------------------------------|----------------------------------------------------------------------|--------------------------------------------------------------------------------------------------------------------------------------------------------------------------------------------------------------------------------------------------------------------------------------------------------------------------------------------------------------------------------------------------------|-----|-----------|
| PF11_0087   | Rad51 homolog                                             | PF00549 (Ligase_CoA); PF02629 (CoA_binding)                          | GO:0000150 (recombinase activity); GO:0000166 (nucleotide binding); GO:0003677 (DNA binding); GO:0003684 (damaged DNA binding); GO:0005515 (protein binding); GO:0005524 (ATP binding); GO:0005634 (nucleus); GO:0006259 (DNA metabolic process); GO:0006281 (DNA repair); GO:0006310 (DNA recombination); GO:0008094 (DNA-dependent ATPase activity); GO:0017111 (nucleoside-triphosphatase activity) | 0.2 | 4.0283619 |
| PF10_0071   | rhoGAP GTPase, putative                                   | PF00027 (cNMP_binding)                                               | GO:0005100 (Rho GTPase activator activity); GO:0005622 (intracellular); GO:0007165 (signal transduction); GO:0007266 (Rho protein signal transduction); GO:0020011 (apicoplast)                                                                                                                                                                                                                        | 0.1 | 5.4855672 |
| PFL2505c    | rhoptry neck protein 3, putative                          |                                                                      | GO:0020011 (apicoplast)                                                                                                                                                                                                                                                                                                                                                                                | 0.1 | 5.4583951 |
| MAL13P1.292 | riboflavin kinase / FAD synthase family protein, putative | PF00005 (ABC_tran); PF00664 (ABC_membrane)                           | GO:0008531 (riboflavin kinase activity); GO:0009231 (riboflavin biosynthetic process)                                                                                                                                                                                                                                                                                                                  | 0.2 | 1.6471748 |
| PF14_0053   | ribonucleotide reductase small subunit                    | PF00133 (tRNA-synt_1); PF08264 (Anticodon_1)                         | GO:0004748 (ribonucleoside-diphosphate reductase activity); GO:0005575 (cellular_component); GO:0006260 (DNA replication); GO:0009186 (deoxyribonucleoside diphosphate metabolic process); GO:0016491 (oxidoreductase activity); GO:0046914 (transition metal ion binding)                                                                                                                             | 1   | 4.0946595 |
| PF10_0154   | ribonucleotide reductase small subunit, putative          | PF00133 (tRNA-synt_1); PF08264 (Anticodon_1); PF09334 (tRNA-synt_1g) | GO:0004748 (ribonucleoside-diphosphate reductase activity); GO:0005575 (cellular_component); GO:0006260 (DNA replication); GO:0009186 (deoxyribonucleoside diphosphate metabolic process); GO:0016491 (oxidoreductase activity); GO:0046914 (transition metal ion binding)                                                                                                                             | 0.8 | 4.1806503 |



|           |                                                            |                                                                               |                                                                                                                                                                                                                                                        |     |           |
|-----------|------------------------------------------------------------|-------------------------------------------------------------------------------|--------------------------------------------------------------------------------------------------------------------------------------------------------------------------------------------------------------------------------------------------------|-----|-----------|
| PFE1080w  | ribosomal large subunit pseudouridylate synthase, putative | PF00133 (tRNA-synt_1);<br>PF08264 (Anticodon_1)                               | GO:0001522 (pseudouridine synthesis); GO:0003723 (RNA binding); GO:0004730 (pseudouridylate synthase activity); GO:0006364 (rRNA processing); GO:0009451 (RNA modification); GO:0009982 (pseudouridine synthase activity)                              | 0.5 | 2.9562018 |
| PFL1705w  | RNA binding protein, putative                              | PF00006 (ATP-synt_ab);<br>PF00306 (ATP-synt_ab_C);<br>PF02874 (ATP-synt_ab_N) | GO:0000166 (nucleotide binding); GO:0003676 (nucleic acid binding); GO:0005515 (protein binding); GO:0008270 (zinc ion binding)                                                                                                                        | 0.5 | 1.6226167 |
| PF08_0096 | RNA helicase, putative                                     | PF00006 (ATP-synt_ab);<br>PF00306 (ATP-synt_ab_C);<br>PF02874 (ATP-synt_ab_N) | GO:0003676 (nucleic acid binding); GO:0003724 (RNA helicase activity); GO:0004386 (helicase activity); GO:0005524 (ATP binding); GO:0008026 (ATP-dependent helicase activity)                                                                          | 0.2 | 2.4293568 |
| PFE0465c  | RNA polymerase I                                           | PF00006 (ATP-synt_ab);<br>PF00306 (ATP-synt_ab_C);<br>PF02874 (ATP-synt_ab_N) | GO:0003677 (DNA binding); GO:0003899 (DNA-directed RNA polymerase activity); GO:0005736 (DNA-directed RNA polymerase I complex); GO:0006350 (transcription); GO:0006360 (transcription from RNA polymerase I promoter)                                 | 0.1 | 1.6057119 |
| PF14_0476 | serine/threonine protein kinase, putative                  | PF00749 (tRNA-synt_1c);<br>PF03950 (tRNA-synt_1c_C)                           | GO:0004672 (protein kinase activity); GO:0004674 (protein serine/threonine kinase activity); GO:0004713 (protein tyrosine kinase activity); GO:0005524 (ATP binding); GO:0005575 (cellular_component); GO:0006468 (protein amino acid phosphorylation) | 0.5 | 0.4243658 |
| PFC0385c  | serine/threonine protein kinase, putative                  | PF00709 (Adenylsucc_synt)                                                     | GO:0004672 (protein kinase activity); GO:0004674 (protein serine/threonine kinase activity); GO:0004713 (protein tyrosine kinase activity); GO:0005524 (ATP binding); GO:0006468 (protein amino acid phosphorylation)                                  | 0.9 | 5.0894274 |
| MAL7P1.18 | serine/threonine protein kinase, putative                  |                                                                               | GO:0004672 (protein kinase activity); GO:0004674 (protein serine/threonine kinase activity); GO:0004713 (protein tyrosine kinase activity); GO:0005524 (ATP binding); GO:0006468 (protein amino acid phosphorylation)                                  | 0.1 | 5.2108704 |

|           |                                                                          |                                                                                                                                                                            |                                                                                                                                                                                                                                                                                              |     |           |
|-----------|--------------------------------------------------------------------------|----------------------------------------------------------------------------------------------------------------------------------------------------------------------------|----------------------------------------------------------------------------------------------------------------------------------------------------------------------------------------------------------------------------------------------------------------------------------------------|-----|-----------|
| PF14_0392 | serine/threonine protein kinase, putative                                | PF00562 (RNA_pol_Rpb2_6);<br>PF04560 (RNA_pol_Rpb2_7);<br>PF04561 (RNA_pol_Rpb2_2);<br>PF04563 (RNA_pol_Rpb2_1);<br>PF04565 (RNA_pol_Rpb2_3);<br>PF04566 (RNA_pol_Rpb2_4); | GO:0004672 (protein kinase activity); GO:0004674 (protein serine/threonine kinase activity); GO:0004713 (protein tyrosine kinase activity); GO:0005524 (ATP binding); GO:0005575 (cellular_component); GO:0006468 (protein amino acid phosphorylation)                                       | 0.5 | 5.4347111 |
| PFE1290w  | serine/threonine-protein kinase Nek-2                                    |                                                                                                                                                                            | GO:0004672 (protein kinase activity); GO:0004674 (protein serine/threonine kinase activity); GO:0004713 (protein tyrosine kinase activity); GO:0005524 (ATP binding); GO:0005575 (cellular_component); GO:0006468 (protein amino acid phosphorylation)                                       | 0.5 | 1.2082574 |
| MAL7P1.37 | sin3 associated polypeptide p18-like protein                             | PF00136 (DNA_pol_B); PF03104 (DNA_pol_B_exo)                                                                                                                               | GO:0000118 (histone deacetylase complex); GO:0003714 (transcription corepressor activity); GO:0006357 (regulation of transcription from RNA polymerase II promoter)                                                                                                                          | 0.3 | 3.4253201 |
| PF11_0301 | spermidine synthase                                                      | PF00670 (AdoHcyase_NAD)                                                                                                                                                    | GO:0003824 (catalytic activity); GO:0004766 (spermidine synthase activity); GO:0005575 (cellular_component); GO:0008295 (spermidine biosynthetic process)                                                                                                                                    | 0.6 | 3.0168268 |
| PF11_0097 | succinyl-CoA synthetase alpha subunit, putative                          | PF00268 (Ribonuc_red_sm)                                                                                                                                                   | GO:0003824 (catalytic activity); GO:0004776 (succinate-CoA ligase (GDP-forming) activity); GO:0005488 (binding); GO:0006099 (tricarboxylic acid cycle); GO:0006104 (succinyl-CoA metabolic process); GO:0008152 (metabolic process); GO:0045244 (succinate-CoA ligase complex (GDP-forming)) | 0.6 | 4.6933807 |
| PFF0560c  | SWI/SNF-related matrix-associated actin-dependent regulator of chromatin | PF00136 (DNA_pol_B); PF03104 (DNA_pol_B_exo)                                                                                                                               |                                                                                                                                                                                                                                                                                              | 0.1 | 2.5608254 |
| PF11_0404 | transcription factor with AP2 domain(s), putative                        | PF00056 (Ldh_1_N)                                                                                                                                                          | GO:0003700 (transcription factor activity)                                                                                                                                                                                                                                                   | 0.5 | 2.1627753 |

|           |                                       |                       |                                                                                                                                                                                                                                                                                                                                                                                                         |     |           |
|-----------|---------------------------------------|-----------------------|---------------------------------------------------------------------------------------------------------------------------------------------------------------------------------------------------------------------------------------------------------------------------------------------------------------------------------------------------------------------------------------------------------|-----|-----------|
| PFB0290c  | transcription factor, putative        | PF00149 (Metallophos) | GO:0003676 (nucleic acid binding); GO:0003700 (transcription factor activity); GO:0005666 (DNA-directed RNA polymerase III complex); GO:0006383 (transcription from RNA polymerase III promoter); GO:0008270 (zinc ion binding); GO:0030528 (transcription regulator activity); GO:0045449 (regulation of transcription)                                                                                | 0.6 | 1.6790595 |
| PFB0435c  | transporter, putative                 | PF00069 (Pkinase)     | GO:0005328 (neurotransmitter:sodium symporter activity); GO:0005887 (integral to plasma membrane); GO:0006836 (neurotransmitter transport); GO:0016020 (membrane)                                                                                                                                                                                                                                       | 0.5 | 5.2228791 |
| PF10_0084 | tubulin beta chain, putative          | PF00069 (Pkinase)     | GO:0000226 (microtubule cytoskeleton organization and biogenesis); GO:0003924 (GTPase activity); GO:0005198 (structural molecule activity); GO:0005200 (structural constituent of cytoskeleton); GO:0005525 (GTP binding); GO:0005874 (microtubule); GO:0007017 (microtubule-based process); GO:0007018 (microtubule-based movement); GO:0043234 (protein complex); GO:0051258 (protein polymerization) | 1   | 4.3937228 |
| PF13_0182 | ubiquitin-activating enzyme, putative | PF00069 (Pkinase)     | GO:0003824 (catalytic activity); GO:0005488 (binding); GO:0005524 (ATP binding); GO:0006464 (protein modification process); GO:0008152 (metabolic process); GO:0008641 (small protein activating enzyme activity); GO:0016020 (membrane); GO:0020011 (apicoplast)                                                                                                                                       | 0.1 | 3.6853546 |
| PFD0305c  | vacuolar ATP synthase subunit b       | PF00036 (efhand)      | GO:0007035 (vacuolar acidification); GO:0015986 (ATP synthesis coupled proton transport); GO:0015992 (proton transport); GO:0016469 (proton-transporting two-sector ATPase complex); GO:0046034 (ATP metabolic process)                                                                                                                                                                                 | 0.7 | 2.9247613 |

|           |                              |                          |                                                                                                                                                                                                                                                                                                                                       |     |           |
|-----------|------------------------------|--------------------------|---------------------------------------------------------------------------------------------------------------------------------------------------------------------------------------------------------------------------------------------------------------------------------------------------------------------------------------|-----|-----------|
| PF14_0589 | valine-tRNA ligase, putative | PF00268 (Ribonuc_red_sm) | GO:0000166 (nucleotide binding); GO:0004812 (aminoacyl-tRNA ligase activity); GO:0004832 (valine-tRNA ligase activity); GO:0005524 (ATP binding); GO:0005575 (cellular_component); GO:0005737 (cytoplasm); GO:0006412 (translation); GO:0006418 (tRNA aminoacylation for protein translation); GO:0006438 (valyl-tRNA aminoacylation) | 0.7 | 2.2389047 |
| PF07_0065 | zinc transporter, putative   |                          | GO:0005385 (zinc ion transmembrane transporter activity); GO:0005887 (integral to plasma membrane); GO:0006812 (cation transport); GO:0006829 (zinc ion transport); GO:0008324 (cation transmembrane transporter activity); GO:0016020 (membrane)                                                                                     | 0.4 | 4.2067632 |
